# Supplementary material for: C-COMPASS: a user-friendly neural network tool profiles cell compartments at protein and lipid levels
Source: Springer Nature journal article supplement (doi:10.1038/s41592-025-02880-3), 2025-12-04
Supplement: MOESM1 [file 41592_2025_2880_MOESM1_ESM.pdf › 41592_2025_2880_MOESM1_ESM.pdf]

# **C-COMPASS: a user-friendly neural network tool profiles cell compartments at protein and lipid levels**

---

In the format provided by the  
authors and unedited

1    **Inventory of Supplementary information**

- 2        -    Procedural suggestion for generating a custom marker list

3

#### 4    **Procedural suggestion for generating a custom marker list**

5    In certain cases, it may be necessary to generate a custom list of spatial marker proteins,  
6    particularly when reference data for specific tissues, organisms, or biological conditions is  
7    unavailable. However, it is possible to derive marker proteins that reflect compartment-specific  
8    profile patterns directly from the dataset itself. To do so, we recommend the following pre-  
9    processing steps on the gradient data: 1) Impute missing values with zero. 2) Apply MinMax  
10   scaling to normalize all protein profiles to a range between 0 and 1.

11   Next, perform hierarchical clustering across the protein dimensions (rows) only, without  
12   clustering the fraction dimension (columns). After clustering, identify protein clusters that are  
13   enriched for annotations associated with specific organelles or compartments. We recommend  
14   using Gene Ontology Cellular Component (GOCC) annotations for this purpose. This  
15   enrichment can be assessed manually or via algorithmic approaches that identify clusters with  
16   the strongest enrichment for the compartments of interest. If performed manually, we  
17   recommend prioritizing clusters with distinctive profile patterns over large cluster sizes.

18   The resulting set of proteins can then be compiled into a marker list, with each protein  
19   annotated according to the enriched compartment. To be used in C-COMPASS, this list must  
20   contain at least two columns: one serving as an identifier (e.g. gene names), and one indicating  
21   the assigned compartment annotation. A comprehensive list of marker proteins used in our  
22   experiments can be found in the supplementary material.

23   Below, we provide a list of publications in which this strategy has been successfully applied to  
24   derive compartment-specific marker proteins:

25   Klingelhuber, F. et al. A spatiotemporal proteomic map of human adipogenesis. *Nat Metab* **6**,  
26   861-879 (2024)

27   Krahmer, N. et al. Organellar Proteomics and Phospho-Proteomics Reveal Subcellular  
28   Reorganization in Diet-Induced Hepatic Steatosis. *Dev Cell* **47**, 205-221 e207 (2018)
