# Supplementary material for: C-COMPASS: a user-friendly neural network tool profiles cell compartments at protein and lipid levels
Source: Nat Methods. 2025 Dec 4;23(1):118–30. doi: 10.1038/s41592-025-02880-3 (PMC12791020; doi:10.1038/s41592-025-02880-3)
Supplement: Supplementary file 4 — Prediction results for C-COMPASS and from original study by Klingelhuber et al. [file 41592_2025_2880_MOESM4_ESM.xlsx]

## Sheet: Prediction Comparison
ProteinGroups	Genes	UniProtIds	MarkerCompartment	MainCompartment Klingelhuber_et_al	MainCompartment CCMPS
A0A024QZW4;Q9H1N7	SLC35B3	A0A024QZW4;Q9H1N7			GOLGI APPARATUS
A0A024QZX5;A0A087X1N8;P35237	SERPINB6	A0A024QZX5;A0A087X1N8;P35237		Cytosol	CYTOPLASM
A0A024R1R8;Q9Y2S6	ENSG00000225528;TMA7	A0A024R1R8;Q9Y2S6		Translation	CYTOPLASM
A0A024R3M2;A0A1B0GUD6;A0A1B0GWG7;A0A2R8Y5X2;J3KNL5;Q3KR37;Q3KR37-2;Q3KR37-3;Q3KR37-4	GRAMD1B	A0A024R3M2;A0A1B0GUD6;A0A1B0GWG7;A0A2R8Y5X2;J3KNL5;Q3KR37;Q3KR37-2;Q3KR37-3;Q3KR37-4		Golgi	GOLGI APPARATUS
A0A024R4E5;Q00341	HDLBP	A0A024R4E5;Q00341		PM	TRANSLATION
A0A024R7E8;K7EMV4;K7EN05;K7EPC8;K7EQ44;P60002	ELOF1	A0A024R7E8;K7EMV4;K7EN05;K7EPC8;K7EQ44;P60002		Cytosol	nan
A0A024R7P0;O14593;O14593-2;O14593-3	RFXANK	A0A024R7P0;O14593;O14593-2;O14593-3		Nucleus	NUCLEUS
A0A024R7W5;A0A087WY31;A0A087X0Q1;Q7Z739	YTHDF3	A0A024R7W5;A0A087WY31;A0A087X0Q1;Q7Z739		Endosome	TRANSLATION
A0A024RA52;P25787	PSMA2	A0A024RA52;P25787	PROTEIN-COMPLEX	Protein Complex	PROTEIN-COMPLEX
A0A024RAC6;Q14241	ELOA	A0A024RAC6;Q14241		Nucleus	NUCLEUS
A0A024RBG1;Q9NZJ9-2	NUDT4B;NUDT4	A0A024RBG1;Q9NZJ9-2	CYTOPLASM		CYTOPLASM
A0A024RCQ8;A0A0G2JHB6;A0A0G2JID8;A0A0G2JK02;A0A0G2JLL3;A2ABN7;G8JLL2;Q9UMR5;Q9UMR5-2;Q9UMR5-3	PPT2;PPT2;PPT2;PPT2;ENSG00000254875;PPT2;PPT2;PPT2;PPT2;PPT2	A0A024RCQ8;A0A0G2JHB6;A0A0G2JID8;A0A0G2JK02;A0A0G2JLL3;A2ABN7;G8JLL2;Q9UMR5;Q9UMR5-2;Q9UMR5-3	LYSOSOME		LYSOSOME
A0A024RCR6;A0A0G2JK23;P46379;P46379-2;P46379-3	BAG6	A0A024RCR6;A0A0G2JK23;P46379;P46379-2;P46379-3	CYTOPLASM	Cytosol	CYTOPLASM
A0A067XG54;Q8NB49;Q8NB49-2;Q8NB49-3;Q8NB49-4	ATP11C	A0A067XG54;Q8NB49;Q8NB49-2;Q8NB49-3;Q8NB49-4	ENDOSOME-VESICLE	Translation	ENDOSOME-VESICLE
A0A075B6E4;A0A0A6YYI5;E7EWF5;G5E9M7;G5E9M9;Q14135;Q14135-2;Q14135-4	VGLL4	A0A075B6E4;A0A0A6YYI5;E7EWF5;G5E9M7;G5E9M9;Q14135;Q14135-2;Q14135-4		Cytosol	CYTOPLASM
A0A075B6F9;Q9Y314	NOSIP	A0A075B6F9;Q9Y314		Cytosol	LD
A0A075B6G3;A0A087WTU7;A0A087WV90;A0A5H1ZRP8;P11532;P11532-11;P11532-4	DMD	A0A075B6G3;A0A087WTU7;A0A087WV90;A0A5H1ZRP8;P11532;P11532-11;P11532-4			TRANSLATION
A0A075B6P0;Q330K2;Q330K2-2	NDUFAF6	A0A075B6P0;Q330K2;Q330K2-2	MITOCHONDRIA	Mitochondria	MITOCHONDRIA
A0A075B6T4;Q9NVX7;Q9NVX7-2	KBTBD4	A0A075B6T4;Q9NVX7;Q9NVX7-2			PROTEIN-COMPLEX
A0A075B730;P58107	EPPK1	A0A075B730;P58107			PM
A0A075B749;A0A087WX83;Q5VU43-3	PDE4DIP	A0A075B749;A0A087WX83;Q5VU43-3			CYTOPLASM
A0A075B773;O00623	PEX12	A0A075B773;O00623		Protein Complex	LYSOSOME
A0A075B784;Q9P275	USP36	A0A075B784;Q9P275			NUCLEUS
A0A075B7B1	SYNM	A0A075B7B1			ENDOSOME-VESICLE
A0A075B7B7;Q8NHY3	GAS2L2	A0A075B7B7;Q8NHY3			PROTEIN-COMPLEX
A0A087WSV0;Q9HB09;Q9HB09-3	BCL2L12	A0A087WSV0;Q9HB09;Q9HB09-3			PROTEIN-COMPLEX
A0A087WSW9;A0A087WSY9;Q16881;Q16881-3;Q16881-4	TXNRD1	A0A087WSW9;A0A087WSY9;Q16881;Q16881-3;Q16881-4		Cytosol	CYTOPLASM
A0A087WT12;A0A087X2I2;P36969;P36969-2	GPX4	A0A087WT12;A0A087X2I2;P36969;P36969-2		Cytosol	CYTOPLASM
A0A087WT18;Q96A73;Q96A73-2	KIAA1191	A0A087WT18;Q96A73;Q96A73-2			CYTOPLASM
A0A087WT20;Q9NV06	DCAF13	A0A087WT20;Q9NV06	NUCLEUS	Nucleus	NUCLEUS
A0A087WT23;A0A087WV67;O00124;O00124-3	UBXN8	A0A087WT23;A0A087WV67;O00124;O00124-3			nan
A0A087WT44	HMOX2	A0A087WT44	ER	ER	ER
A0A087WT64;Q07820	MCL1	A0A087WT64;Q07820			PROTEIN-COMPLEX
A0A087WT80;A0A087WW73;A0A0D9SF51;A0A0D9SG17;A0A1B0GWB6;Q9NQ66;Q9NQ66-2	PLCB1	A0A087WT80;A0A087WW73;A0A0D9SF51;A0A0D9SG17;A0A1B0GWB6;Q9NQ66;Q9NQ66-2			LD
A0A087WT84;Q9H9V9;Q9H9V9-2	JMJD4	A0A087WT84;Q9H9V9;Q9H9V9-2		Cytosol	LD
A0A087WT87;A0A087X0U3;P43003;P43003-2	SLC1A3	A0A087WT87;A0A087X0U3;P43003;P43003-2	ENDOSOME-VESICLE	PM	ENDOSOME-VESICLE
A0A087WT92;Q0VGL1	LAMTOR4	A0A087WT92;Q0VGL1	LYSOSOME	ER	ER
A0A087WTA8;P08123	COL1A2	A0A087WTA8;P08123		Nucleus	LD
A0A087WTP3;Q92945	KHSRP	A0A087WTP3;Q92945		Nucleus	CYTOPLASM
A0A087WTT9;A0A087WX43;A0A096LNJ4;A0A1B0GVW6;D6RE84;Q9NP73;Q9NP73-2	ALG13	A0A087WTT9;A0A087WX43;A0A096LNJ4;A0A1B0GVW6;D6RE84;Q9NP73;Q9NP73-2		Cytosol	ER
A0A087WTU1;A0A087X0S7;A0A0B4J2G4;Q15345;Q15345-3	LRRC41	A0A087WTU1;A0A087X0S7;A0A0B4J2G4;Q15345;Q15345-3	NUCLEUS	Nucleus	NUCLEUS
A0A087WU02;Q96RQ1	ERGIC2	A0A087WU02;Q96RQ1	GOLGI APPARATUS	ER	GOLGI APPARATUS
A0A087WU07;Q5TGZ0	MICOS10	A0A087WU07;Q5TGZ0		Mitochondria	MITOCHONDRIA
A0A087WU53;Q9H0U3	MAGT1	A0A087WU53;Q9H0U3	ER	ER	ER
A0A087WU65;A0A2R8YE10;Q9NRW7	VPS45	A0A087WU65;A0A2R8YE10;Q9NRW7	ENDOSOME-VESICLE	Endosome	ENDOSOME-VESICLE
A0A087WU73;A0A087X287;A0A494BZX7;A0A499FIJ6;B0QY83;E7ER32;Q969V6;W0Z7M9	MRTFA	A0A087WU73;A0A087X287;A0A494BZX7;A0A499FIJ6;B0QY83;E7ER32;Q969V6;W0Z7M9		Nucleus	CYTOPLASM
A0A087WU78;A0A087WWC4;Q6T4R5;Q6T4R5-2;Q6T4R5-3;Q6T4R5-4	NHS	A0A087WU78;A0A087WWC4;Q6T4R5;Q6T4R5-2;Q6T4R5-3;Q6T4R5-4			PROTEIN-COMPLEX
A0A087WUB9;Q8WYA6;Q8WYA6-4	CTNNBL1	A0A087WUB9;Q8WYA6;Q8WYA6-4	NUCLEUS	Nucleus	NUCLEUS
A0A087WUC6;E9PI68;Q15005	SPCS2	A0A087WUC6;E9PI68;Q15005	ER	ER	ER
A0A087WUD3;Q9NRP0;Q9NRP0-2	OSTC	A0A087WUD3;Q9NRP0;Q9NRP0-2		ER	MITOCHONDRIA
A0A087WUI6;Q8WXW3	PIBF1	A0A087WUI6;Q8WXW3			GOLGI APPARATUS
A0A087WUK2;O14979	HNRNPDL	A0A087WUK2;O14979	NUCLEUS	Translation	TRANSLATION
A0A087WUQ6;P07203	GPX1	A0A087WUQ6;P07203		Mitochondria	MITOCHONDRIA
A0A087WUT6;O60841	EIF5B	A0A087WUT6;O60841	TRANSLATION	Translation	TRANSLATION
A0A087WUW6;A0A087X0G7;A0A087X1B1;Q9Y6K9;Q9Y6K9-2	IKBKG	A0A087WUW6;A0A087X0G7;A0A087X1B1;Q9Y6K9;Q9Y6K9-2		Cytosol	CYTOPLASM
A0A087WUW9;Q9NXU5	ARL15	A0A087WUW9;Q9NXU5			PM
A0A087WUZ7;Q9Y5W8;Q9Y5W8-2	SNX13	A0A087WUZ7;Q9Y5W8;Q9Y5W8-2		ER	ER
A0A087WV05;Q99417	ENSG00000274944;MYCBP	A0A087WV05;Q99417		Cytosol	CYTOPLASM
A0A087WV25;O95684;O95684-2	CEP43	A0A087WV25;O95684;O95684-2			CYTOPLASM
A0A087WV97;Q8WU79;Q8WU79-2;Q8WU79-3;X6RCC3	SMAP2	A0A087WV97;Q8WU79;Q8WU79-2;Q8WU79-3;X6RCC3	CYTOPLASM	Cytosol	CYTOPLASM
A0A087WVA1;P62341;Q6IAK0	SELENOT	A0A087WVA1;P62341;Q6IAK0			LD
A0A087WVC4;A0A0A0MS54;P22694;P22694-2;P22694-3;P22694-4;P22694-5;P22694-6;P22694-7;P22694-9	PRKACB	A0A087WVC4;A0A0A0MS54;P22694;P22694-2;P22694-3;P22694-4;P22694-5;P22694-6;P22694-7;P22694-9		Cytosol	CYTOPLASM
A0A087WVD1	LENG9	A0A087WVD1			PROTEIN-COMPLEX
A0A087WVF7;Q9NZM3;Q9NZM3-2;Q9NZM3-3;Q9NZM3-4	ITSN2	A0A087WVF7;Q9NZM3;Q9NZM3-2;Q9NZM3-3;Q9NZM3-4		Cytosol	CYTOPLASM
A0A087WVI1;Q96JY6;Q96JY6-5	PDLIM2	A0A087WVI1;Q96JY6;Q96JY6-5		Protein Complex	CYTOPLASM
A0A087WVM1;P78382;P78382-2;Q5W1L7	SLC35A1	A0A087WVM1;P78382;P78382-2;Q5W1L7			GOLGI APPARATUS
A0A087WVQ6;Q00610;Q00610-2	CLTC	A0A087WVQ6;Q00610;Q00610-2	PROTEIN-COMPLEX	Protein Complex	CYTOPLASM
A0A087WVS8;Q70IA6;Q70IA6-2;Q70IA6-3	MOB2	A0A087WVS8;Q70IA6;Q70IA6-2;Q70IA6-3		Cytosol	CYTOPLASM
A0A087WVT6;A0A087X159;D6RAC5;P81877;P81877-2;P81877-3;P81877-4;P81877-5;Q9BWW4;Q9BWW4-2;Q9BWW4-3	SSBP3;SSBP2;SSBP2;SSBP2;SSBP2;SSBP2;SSBP2;SSBP2;SSBP3;SSBP3;SSBP3	A0A087WVT6;A0A087X159;D6RAC5;P81877;P81877-2;P81877-3;P81877-4;P81877-5;Q9BWW4;Q9BWW4-2;Q9BWW4-3		Nucleus	NUCLEUS
A0A087WW00;P51668	UBE2D1	A0A087WW00;P51668			CYTOPLASM
A0A087WW06;Q96AY4	TTC28	A0A087WW06;Q96AY4		Protein Complex	CYTOPLASM
A0A087WW59;Q7Z7L8	C11orf96	A0A087WW59;Q7Z7L8			LD
A0A087WWA3;O60333;O60333-2;O60333-4;Q4R9M9	KIF1B	A0A087WWA3;O60333;O60333-2;O60333-4;Q4R9M9		Protein Complex	TRANSLATION
A0A087WWE7;E5RGR5;Q8N0T1;Q8N0T1-2	RBIS	A0A087WWE7;E5RGR5;Q8N0T1;Q8N0T1-2			CYTOPLASM
A0A087WWF1;Q8WWX9	SELENOM	A0A087WWF1;Q8WWX9		ER	ER
A0A087WWF6;F8W8R3;H7C1B3;P49005	POLD2	A0A087WWF6;F8W8R3;H7C1B3;P49005		Nucleus	LD
A0A087WWG3;A0A087X140;A0A0A0MRU4;A0A0A6YYH9;C9J3G2;Q5JTY5;Q5JTY5-2;Q5RIA9;Q5RIA9-3;Q5RIB0;Q8IUF1;Q9BRT8;Q9BRT8-3	CBWD3;CBWD1;CBWD3;CBWD5;CBWD2;CBWD3;CBWD3;CBWD5;CBWD5;CBWD5;CBWD2;CBWD1;CBWD1	A0A087WWG3;A0A087X140;A0A0A0MRU4;A0A0A6YYH9;C9J3G2;Q5JTY5;Q5JTY5-2;Q5RIA9;Q5RIA9-3;Q5RIB0;Q8IUF1;Q9BRT8;Q9BRT8-3		Cytosol	CYTOPLASM
A0A087WWH3;Q9NZM4;Q9NZM4-2	BICRA	A0A087WWH3;Q9NZM4;Q9NZM4-2			NUCLEUS
A0A087WWM0;O43617	TRAPPC3	A0A087WWM0;O43617	CYTOPLASM	Cytosol	CYTOPLASM
A0A087WWM4;H0YNJ6;Q9P2T1;Q9P2T1-2	GMPR2	A0A087WWM4;H0YNJ6;Q9P2T1;Q9P2T1-2		Cytosol	PROTEIN-COMPLEX
A0A087WWM6;E7EQL6;O43272;O43272-1;O43272-2	PRODH	A0A087WWM6;E7EQL6;O43272;O43272-1;O43272-2	MITOCHONDRIA		MITOCHONDRIA
A0A087WWP4;A0A494C001;A0A499FJY3;Q96T37;Q96T37-2;Q96T37-3;Q96T37-4	RBM15	A0A087WWP4;A0A494C001;A0A499FJY3;Q96T37;Q96T37-2;Q96T37-3;Q96T37-4	NUCLEUS	Protein Complex	NUCLEUS
A0A087WWQ2;Q92979;V9GYP5	EMG1	A0A087WWQ2;Q92979;V9GYP5	NUCLEUS		NUCLEUS
A0A087WWS1;Q96FV9	THOC1	A0A087WWS1;Q96FV9		Nucleus	PM
A0A087WWW9;O95999	BCL10	A0A087WWW9;O95999			CYTOPLASM
A0A087WX11;J3KNG8;Q8TF40;Q8TF40-3	FNIP1	A0A087WX11;J3KNG8;Q8TF40;Q8TF40-3			GOLGI APPARATUS
A0A087WX19;A0A087WX45;C9J5R6	IQCE	A0A087WX19;A0A087WX45;C9J5R6		Mitochondria	MITOCHONDRIA
A0A087WX23	PEG10	A0A087WX23		Cytosol	TRANSLATION
A0A087WX48;Q8IUX4;Q96AK3	APOBEC3D;APOBEC3F;APOBEC3D	A0A087WX48;Q8IUX4;Q96AK3			TRANSLATION
A0A087WXB0;O15126	SCAMP1	A0A087WXB0;O15126	ENDOSOME-VESICLE	Endosome	ENDOSOME-VESICLE
A0A087WXC5;E7ESZ7;O95299	NDUFA10	A0A087WXC5;E7ESZ7;O95299	MITOCHONDRIA	Mitochondria	MITOCHONDRIA
A0A087WXD1;Q96T83	SLC9A7	A0A087WXD1;Q96T83	ENDOSOME-VESICLE		ENDOSOME-VESICLE
A0A087WXE9;Q6UXH9	PAMR1	A0A087WXE9;Q6UXH9			LD
A0A087WXF8;A0A0D9SEW3;Q9NP64;Q9NP64-2;Q9NP64-3	ZCCHC17	A0A087WXF8;A0A0D9SEW3;Q9NP64;Q9NP64-2;Q9NP64-3			TRANSLATION
A0A087WXK4;Q7Z3F1	GPR155	A0A087WXK4;Q7Z3F1			ER
A0A087WXL6;B7Z879;Q9H270	VPS11	A0A087WXL6;B7Z879;Q9H270		Protein Complex	ENDOSOME-VESICLE
A0A087WXM6;A0A0A6YYL6;J3KRX5;J3QQT2;P18621;P18621-3	RPL17;RPL17-C18orf32;RPL17;RPL17;RPL17;RPL17	A0A087WXM6;A0A0A6YYL6;J3KRX5;J3QQT2;P18621;P18621-3		Translation	TRANSLATION
A0A087WXN9;Q765P7	MTSS2	A0A087WXN9;Q765P7		Cytosol	CYTOPLASM
A0A087WXP3;E9PEE8;P18564;P18564-2	ITGB6	A0A087WXP3;E9PEE8;P18564;P18564-2			ER
A0A087WXR7;A0A087WZJ6;A0A2R8Y459;A0A2R8Y4S2;A0A2R8Y687;A0A2R8Y6M7;A0A2R8Y6Q6;A0A2R8Y6Y1;A0A2R8Y761;A0A2R8Y7Q3;A0A2R8Y7R8;A0A2R8Y883;A0A2R8YCJ4;A0A2R8YCP1;A0A2R8YCX2;A0A2R8YE60;A0A2R8YEC1;A0A2R8YEH2;A0A2R8YGP2;Q5TBB1;Q5TBB1-2	RNASEH2B	A0A087WXR7;A0A087WZJ6;A0A2R8Y459;A0A2R8Y4S2;A0A2R8Y687;A0A2R8Y6M7;A0A2R8Y6Q6;A0A2R8Y6Y1;A0A2R8Y761;A0A2R8Y7Q3;A0A2R8Y7R8;A0A2R8Y883;A0A2R8YCJ4;A0A2R8YCP1;A0A2R8YCX2;A0A2R8YE60;A0A2R8YEC1;A0A2R8YEH2;A0A2R8YGP2;Q5TBB1;Q5TBB1-2		Cytosol	CYTOPLASM
A0A087WXU0;Q9NWS8	RMND1	A0A087WXU0;Q9NWS8	MITOCHONDRIA	Mitochondria	MITOCHONDRIA
A0A087WXX3;Q8N196	SIX5	A0A087WXX3;Q8N196			CYTOPLASM
A0A087WY35;O95965	ITGBL1	A0A087WY35;O95965			LD
A0A087WY55;Q9NP79	VTA1	A0A087WY55;Q9NP79	CYTOPLASM	Cytosol	CYTOPLASM
A0A087WY62	NBPF26	A0A087WY62			LYSOSOME
A0A087WY71;Q96CW1;Q96CW1-2	AP2M1	A0A087WY71;Q96CW1;Q96CW1-2		Protein Complex	ENDOSOME-VESICLE
A0A087WYD6;A0A0G2JLV0;Q03519;X5CMH5	TAP2	A0A087WYD6;A0A0G2JLV0;Q03519;X5CMH5	ER	ER	ER
A0A087WYF7;Q6UXV4	APOOL	A0A087WYF7;Q6UXV4	MITOCHONDRIA	Mitochondria	MITOCHONDRIA
A0A087WYL5;Q6UXD5-3;Q6UXD5-5	SEZ6L2	A0A087WYL5;Q6UXD5-3;Q6UXD5-5			ENDOSOME-VESICLE
A0A087WYN9;Q7Z478	DHX29	A0A087WYN9;Q7Z478		ER	ER
A0A087WYR0;P09132	SRP19	A0A087WYR0;P09132	CYTOPLASM	Protein Complex	PROTEIN-COMPLEX
A0A087WYS1;E7EUC7;Q16851	UGP2	A0A087WYS1;E7EUC7;Q16851	PROTEIN-COMPLEX	Cytosol	PROTEIN-COMPLEX
A0A087WYT3;Q15185;Q15185-4	PTGES3	A0A087WYT3;Q15185;Q15185-4	CYTOPLASM	Cytosol	CYTOPLASM
A0A087WYY0;A0A087X260;B1AKP7;G3V162;Q13148	TARDBP	A0A087WYY0;A0A087X260;B1AKP7;G3V162;Q13148		Nucleus	NUCLEUS
A0A087WZ13;E9PAU2;Q8IY67-2	RAVER1	A0A087WZ13;E9PAU2;Q8IY67-2		Nucleus	TRANSLATION
A0A087WZ50;Q8TCT7;Q8TCT7-2;Q8TCT7-4	SPPL2B	A0A087WZ50;Q8TCT7;Q8TCT7-2;Q8TCT7-4		ER	ER
A0A087WZ62;Q9H6U8;Q9H6U8-3	ENSG00000258529;ALG9;ALG9	A0A087WZ62;Q9H6U8;Q9H6U8-3	ER	PM	ER
A0A087WZ97;A0A087X2C2;Q5T7M9	DIPK1A	A0A087WZ97;A0A087X2C2;Q5T7M9		Golgi	GOLGI APPARATUS
A0A087WZC1;Q6IN84;Q6IN84-2	MRM1	A0A087WZC1;Q6IN84;Q6IN84-2			MITOCHONDRIA
A0A087WZE9	HMGN3	A0A087WZE9	NUCLEUS		NUCLEUS
A0A087WZG4;A0A3B3IPE9;A0A590UK10;Q6ZSZ5;Q6ZSZ5-1;Q6ZSZ5-2;Q6ZSZ5-5;Q6ZSZ5-6	ARHGEF18	A0A087WZG4;A0A3B3IPE9;A0A590UK10;Q6ZSZ5;Q6ZSZ5-1;Q6ZSZ5-2;Q6ZSZ5-5;Q6ZSZ5-6			LD
A0A087WZJ5;A0A087X1E1;A0A2R8Y760;A8MWQ5;E9PNV9;Q9BXS0;Q9BXS0-2;Q9BXS0-3	COL25A1	A0A087WZJ5;A0A087X1E1;A0A2R8Y760;A8MWQ5;E9PNV9;Q9BXS0;Q9BXS0-2;Q9BXS0-3			CYTOPLASM
A0A087WZK9;B3KS98;O15372	EIF3H	A0A087WZK9;B3KS98;O15372	TRANSLATION	Translation	TRANSLATION
A0A087WZN1;O43837	IDH3B	A0A087WZN1;O43837	MITOCHONDRIA	Mitochondria	MITOCHONDRIA
A0A087WZQ7;Q9H115	NAPB	A0A087WZQ7;Q9H115		Endosome	TRANSLATION
A0A087WZT2;Q6UX53	METTL7B	A0A087WZT2;Q6UX53		LD	ER
A0A087WZT3;Q9H3K6	BOLA2B	A0A087WZT3;Q9H3K6		Cytosol	CYTOPLASM
A0A087WZU2;Q00536;Q00536-2;Q00536-3	CDK16	A0A087WZU2;Q00536;Q00536-2;Q00536-3		Cytosol	CYTOPLASM
A0A087WZU5;O43657	TSPAN6	A0A087WZU5;O43657		PM	LYSOSOME
A0A087WZV0;O43314;O43314-2	PPIP5K2	A0A087WZV0;O43314;O43314-2		Cytosol	CYTOPLASM
A0A087WZY2;A6NIV2;Q9P0U1	TOMM7	A0A087WZY2;A6NIV2;Q9P0U1		Mitochondria	LD
A0A087X011;E9PES4;J3KPF9;Q9Y496	KIF3A	A0A087X011;E9PES4;J3KPF9;Q9Y496		Cytosol	CYTOPLASM
A0A087X020;Q9Y3A5	SBDS	A0A087X020;Q9Y3A5	TRANSLATION	Translation	TRANSLATION
A0A087X043;O43424;O43424-2	GRID2	A0A087X043;O43424;O43424-2			ENDOSOME-VESICLE
A0A087X091	WDR13	A0A087X091	PROTEIN-COMPLEX	Cytosol	CYTOPLASM
A0A087X0B7;H7C3C7;Q5SQN1;Q5SQN1-2;U3KPT7	SNAP47	A0A087X0B7;H7C3C7;Q5SQN1;Q5SQN1-2;U3KPT7			ENDOSOME-VESICLE
A0A087X0F1;Q9UK61;Q9UK61-2;Q9UK61-3;Q9UK61-4	TASOR	A0A087X0F1;Q9UK61;Q9UK61-2;Q9UK61-3;Q9UK61-4		Endosome	NUCLEUS
A0A087X0H9;Q5T8P6	RBM26	A0A087X0H9;Q5T8P6	NUCLEUS	Nucleus	NUCLEUS
A0A087X0K0;P39059	COL15A1	A0A087X0K0;P39059		ER	LD
A0A087X0L7;E7EVY0;J3KNA0;Q15070;Q15070-2	OXA1L	A0A087X0L7;E7EVY0;J3KNA0;Q15070;Q15070-2	MITOCHONDRIA	Mitochondria	MITOCHONDRIA
A0A087X0M4;Q9BWU0	SLC4A1AP	A0A087X0M4;Q9BWU0	NUCLEUS	Nucleus	NUCLEUS
A0A087X0P0;Q02224;Q02224-3	CENPE	A0A087X0P0;Q02224;Q02224-3			CYTOPLASM
A0A087X0P9;I3L4S1;Q96CW6	SLC7A6OS	A0A087X0P9;I3L4S1;Q96CW6			CYTOPLASM
A0A087X0Q9;Q9BVL4	SELENOO	A0A087X0Q9;Q9BVL4		Cytosol	CYTOPLASM
A0A087X0R6;Q9UMY4;Q9UMY4-1	SNX12	A0A087X0R6;Q9UMY4;Q9UMY4-1		Cytosol	CYTOPLASM
A0A087X0V4;A8K0B5;D3DPQ2;Q8IWT0	ZBTB8OS	A0A087X0V4;A8K0B5;D3DPQ2;Q8IWT0			CYTOPLASM
A0A087X0W9;Q8N6M0	OTUD6B	A0A087X0W9;Q8N6M0	PROTEIN-COMPLEX	Protein Complex	PROTEIN-COMPLEX
A0A087X0X3;P52272;P52272-2	HNRNPM	A0A087X0X3;P52272;P52272-2	NUCLEUS	Nucleus	NUCLEUS
A0A087X117;A0A0G2JN29;Q15155	NOMO1	A0A087X117;A0A0G2JN29;Q15155		PM	PEROXISOME
A0A087X165;Q9C0H9	SRCIN1	A0A087X165;Q9C0H9		Cytosol	ER
A0A087X1A8;A0A2R8Y3X7;D3VVH9;F5H211;G3V3R7;P54252;P54252-1;P54252-4	ATXN3	A0A087X1A8;A0A2R8Y3X7;D3VVH9;F5H211;G3V3R7;P54252;P54252-1;P54252-4		Cytosol	CYTOPLASM
A0A087X1B2;Q53GS9	USP39	A0A087X1B2;Q53GS9	NUCLEUS	Nucleus	NUCLEUS
A0A087X1E4;P53365;P53365-3	ARFIP2	A0A087X1E4;P53365;P53365-3		Protein Complex	CYTOPLASM
A0A087X1G7;O60613	SELENOF	A0A087X1G7;O60613		Golgi	nan
A0A087X1K1;A0A087X1Z5;Q96C00	ZBTB9	A0A087X1K1;A0A087X1Z5;Q96C00		Cytosol	CYTOPLASM
A0A087X1N0;Q9H3C7	GGNBP2	A0A087X1N0;Q9H3C7			PROTEIN-COMPLEX
A0A087X1U1;E7EUN2;F5GXM9;Q9UPQ3;Q9UPQ3-2	AGAP1	A0A087X1U1;E7EUN2;F5GXM9;Q9UPQ3;Q9UPQ3-2			TRANSLATION
A0A087X1U5;F5H7T0;F6RJM5;Q96S38;Q96S38-2	RPS6KC1	A0A087X1U5;F5H7T0;F6RJM5;Q96S38;Q96S38-2			ENDOSOME-VESICLE
A0A087X1Z1;A0A0G2JPW5;A0A0G2JQX1;A0A0G2JSA7;Q96RT8;Q96RT8-2	TUBGCP5	A0A087X1Z1;A0A0G2JPW5;A0A0G2JQX1;A0A0G2JSA7;Q96RT8;Q96RT8-2		Cytosol	TRANSLATION
A0A087X1Z3;Q9UL46	PSME2	A0A087X1Z3;Q9UL46		Protein Complex	CYTOPLASM
A0A087X211;Q8TCG1	CIP2A	A0A087X211;Q8TCG1			PROTEIN-COMPLEX
A0A087X256;Q2M389	WASHC4	A0A087X256;Q2M389		Protein Complex	PROTEIN-COMPLEX
A0A087X266;Q9BXJ8	TMEM120A	A0A087X266;Q9BXJ8		Endosome	ER
A0A087X279;P09913	IFIT2	A0A087X279;P09913		Cytosol	CYTOPLASM
A0A087X295;Q9NNW5	WDR6	A0A087X295;Q9NNW5			PROTEIN-COMPLEX
A0A087X296;P23219;P23219-2;P23219-3;P23219-5;P23219-6	PTGS1	A0A087X296;P23219;P23219-2;P23219-3;P23219-5;P23219-6		ER	ER
A0A087X2B2;E9PMH5;Q13490;Q13490-2	BIRC2	A0A087X2B2;E9PMH5;Q13490;Q13490-2			CYTOPLASM
A0A087X2D5;Q9BRJ2	MRPL45	A0A087X2D5;Q9BRJ2		Mitochondria	MITOCHONDRIA
A0A087X2I1;P62333	PSMC6	A0A087X2I1;P62333	PROTEIN-COMPLEX	Protein Complex	PROTEIN-COMPLEX
A0A088AWN2;Q8TBZ3;Q8TBZ3-2;Q8TBZ3-4;Q8TBZ3-5;Q8TBZ3-6;Q8TBZ3-7	WDR20	A0A088AWN2;Q8TBZ3;Q8TBZ3-2;Q8TBZ3-4;Q8TBZ3-5;Q8TBZ3-6;Q8TBZ3-7		Golgi	ENDOSOME-VESICLE
A0A088AWN3;A0A0A0MSY4;Q9BZ29;Q9BZ29-3;Q9BZ29-4;Q9BZ29-5	DOCK9	A0A088AWN3;A0A0A0MSY4;Q9BZ29;Q9BZ29-3;Q9BZ29-4;Q9BZ29-5			PROTEIN-COMPLEX
A0A088AWP5;Q8WUY3;Q8WUY3-2;Q8WUY3-3;Q8WUY3-4	PRUNE2	A0A088AWP5;Q8WUY3;Q8WUY3-2;Q8WUY3-3;Q8WUY3-4		Cytosol	CYTOPLASM
A0A096LNH4;Q9BQS2;Q9BQS2-2;Q9BQS2-3;Q9BQS2-4;X6R8R1	LOC102724488;SYT15;SYT15;SYT15;SYT15;SYT15	A0A096LNH4;Q9BQS2;Q9BQS2-2;Q9BQS2-3;Q9BQS2-4;X6R8R1			NUCLEUS
A0A096LNR9;A0A1B0GUM4;A0A669KBC2;O76039;O76039-1	CDKL5	A0A096LNR9;A0A1B0GUM4;A0A669KBC2;O76039;O76039-1			LYSOSOME
A0A096LNV3;A0A096LP02;Q9Y508;Q9Y508-2	RNF114	A0A096LNV3;A0A096LP02;Q9Y508;Q9Y508-2		Cytosol	CYTOPLASM
A0A096LP25	AAK1	A0A096LP25	PROTEIN-COMPLEX	Protein Complex	PROTEIN-COMPLEX
A0A096LP69	CD99	A0A096LP69		Golgi	PM
A0A096LPC5;A0A0A0MR88;Q9Y4E1;Q9Y4E1-1;Q9Y4E1-2;Q9Y4E1-6	WASHC2C	A0A096LPC5;A0A0A0MR88;Q9Y4E1;Q9Y4E1-1;Q9Y4E1-2;Q9Y4E1-6		Protein Complex	PROTEIN-COMPLEX
A0A096LPI6	ENSG00000276612	A0A096LPI6		Nucleus	MITOCHONDRIA
A0A096LPJ4;P05161	ISG15	A0A096LPJ4;P05161		Cytosol	CYTOPLASM
A0A0A0MQR2;Q9BY42	RTF2	A0A0A0MQR2;Q9BY42		Cytosol	CYTOPLASM
A0A0A0MQR7;P19388	POLR2E	A0A0A0MQR7;P19388		Protein Complex	TRANSLATION
A0A0A0MQS1;Q53H96;Q53H96-2	PYCR3	A0A0A0MQS1;Q53H96;Q53H96-2		Cytosol	CYTOPLASM
A0A0A0MQS3;K7ESE5;Q9UNZ5	C19orf53	A0A0A0MQS3;K7ESE5;Q9UNZ5			NUCLEUS
A0A0A0MQS9;A0A0A0MTC7	LAMA4	A0A0A0MQS9;A0A0A0MTC7	PM	PM	ER
A0A0A0MQT0;P09455	RBP1	A0A0A0MQT0;P09455			CYTOPLASM
A0A0A0MQU0;Q9BV38;U3KQC1	WDR18	A0A0A0MQU0;Q9BV38;U3KQC1	NUCLEUS	Nucleus	NUCLEUS
A0A0A0MQU4;Q96I15	SCLY	A0A0A0MQU4;Q96I15		Cytosol	CYTOPLASM
A0A0A0MQV1;P28845	HSD11B1	A0A0A0MQV1;P28845	ER	ER	ER
A0A0A0MQV6;P09038;P09038-1;P09038-2;P09038-3	FGF2	A0A0A0MQV6;P09038;P09038-1;P09038-2;P09038-3		Protein Complex	NUCLEUS
A0A0A0MQW1;A0A2R8Y4X0;A0A2R8Y5H9;A8MY87;Q8IVT5;Q8IVT5-2;Q8IVT5-3;Q8IVT5-4	KSR1	A0A0A0MQW1;A0A2R8Y4X0;A0A2R8Y5H9;A8MY87;Q8IVT5;Q8IVT5-2;Q8IVT5-3;Q8IVT5-4			MITOCHONDRIA
A0A0A0MQX1;Q9HD67	MYO10	A0A0A0MQX1;Q9HD67			LD
A0A0A0MQX8;C9JP00;Q9NR56	MBNL1	A0A0A0MQX8;C9JP00;Q9NR56		Protein Complex	CYTOPLASM
A0A0A0MQY7;A0A3B3ISH2;Q5VU97	CACHD1	A0A0A0MQY7;A0A3B3ISH2;Q5VU97			GOLGI APPARATUS
A0A0A0MR09;P43378	PTPN9	A0A0A0MR09;P43378		Cytosol	TRANSLATION
A0A0A0MR30;A0A0A0MRL4;F8WEZ8;G3XAD3;Q13002;Q13002-2;Q13002-3;Q13002-4;Q13002-5;Q13002-6;Q13002-7	GRIK2	A0A0A0MR30;A0A0A0MRL4;F8WEZ8;G3XAD3;Q13002;Q13002-2;Q13002-3;Q13002-4;Q13002-5;Q13002-6;Q13002-7			ENDOSOME-VESICLE
A0A0A0MR39	MYEF2	A0A0A0MR39	NUCLEUS	Nucleus	NUCLEUS
A0A0A0MR85;Q03013	GSTM4	A0A0A0MR85;Q03013	CYTOPLASM	Cytosol	CYTOPLASM
A0A0A0MR93;A0A0C4DH11;K7ELZ7;K7ES91;Q53F39;Q53F39-2;Q53F39-3	MPPE1	A0A0A0MR93;A0A0C4DH11;K7ELZ7;K7ES91;Q53F39;Q53F39-2;Q53F39-3			GOLGI APPARATUS
A0A0A0MRB5;Q8WXG6;Q8WXG6-2;Q8WXG6-3;Q8WXG6-7	MADD	A0A0A0MRB5;Q8WXG6;Q8WXG6-2;Q8WXG6-3;Q8WXG6-7			LD
A0A0A0MRC4;A0A0A0MSK4;Q86YR5;Q86YR5-4	GPSM1	A0A0A0MRC4;A0A0A0MSK4;Q86YR5;Q86YR5-4		Cytosol	CYTOPLASM
A0A0A0MRE3;G3V5X4;Q8WXH0;Q8WXH0-2	SYNE2	A0A0A0MRE3;G3V5X4;Q8WXH0;Q8WXH0-2		Cytosol	CYTOPLASM
A0A0A0MRE5;Q9ULH1;Q9ULH1-2	ASAP1	A0A0A0MRE5;Q9ULH1;Q9ULH1-2		Cytosol	CYTOPLASM
A0A0A0MRE6;O94967;O94967-2	WDR47	A0A0A0MRE6;O94967;O94967-2		Cytosol	ENDOSOME-VESICLE
A0A0A0MRG8;Q16611	BAK1	A0A0A0MRG8;Q16611		Mitochondria	MITOCHONDRIA
A0A0A0MRG9;Q96SN8;Q96SN8-2;Q96SN8-3;Q96SN8-4	CDK5RAP2	A0A0A0MRG9;Q96SN8;Q96SN8-2;Q96SN8-3;Q96SN8-4			GOLGI APPARATUS
A0A0A0MRI1;Q8IXQ4;Q8IXQ4-2	GPALPP1	A0A0A0MRI1;Q8IXQ4;Q8IXQ4-2			CYTOPLASM
A0A0A0MRI2;Q9UNH7	SNX6	A0A0A0MRI2;Q9UNH7	ENDOSOME-VESICLE	Cytosol	CYTOPLASM
A0A0A0MRJ3;Q8NEY1;Q8NEY1-2;Q8NEY1-3;Q8NEY1-4;Q8NEY1-7	NAV1	A0A0A0MRJ3;Q8NEY1;Q8NEY1-2;Q8NEY1-3;Q8NEY1-4;Q8NEY1-7		Cytosol	TRANSLATION
A0A0A0MRJ6;P22061;P22061-2	PCMT1	A0A0A0MRJ6;P22061;P22061-2	CYTOPLASM	Cytosol	CYTOPLASM
A0A0A0MRJ7;P12259	F5	A0A0A0MRJ7;P12259			GOLGI APPARATUS
A0A0A0MRM8;A0A1Y0BRN3;A0A590UJ40;E7EW20;Q9UM54;Q9UM54-1;Q9UM54-2;Q9UM54-4;Q9UM54-5;Q9UM54-6	MYO6	A0A0A0MRM8;A0A1Y0BRN3;A0A590UJ40;E7EW20;Q9UM54;Q9UM54-1;Q9UM54-2;Q9UM54-4;Q9UM54-5;Q9UM54-6		Cytosol	CYTOPLASM
A0A0A0MRM9;Q14978;Q14978-2;Q14978-3	NOLC1	A0A0A0MRM9;Q14978;Q14978-2;Q14978-3	NUCLEUS	Nucleus	NUCLEUS
A0A0A0MRR7;P09234	SNRPC	A0A0A0MRR7;P09234	NUCLEUS	Nucleus	NUCLEUS
A0A0A0MRS4;Q9NVV0	TMEM38B	A0A0A0MRS4;Q9NVV0		Cytosol	ER
A0A0A0MRT6;Q8IZP0;Q8IZP0-2;Q8IZP0-3;Q8IZP0-4;Q8IZP0-5;Q8IZP0-6;Q8IZP0-9	ABI1	A0A0A0MRT6;Q8IZP0;Q8IZP0-2;Q8IZP0-3;Q8IZP0-4;Q8IZP0-5;Q8IZP0-6;Q8IZP0-9		Cytosol	CYTOPLASM
A0A0A0MRU0;A0A0C4DH75;A0A0D9SFF8;B4DZ84;D3DX48;D3DX49;Q14168;Q14168-2;Q14168-3;Q14168-4;Q14168-5;Q14168-6	MPP2	A0A0A0MRU0;A0A0C4DH75;A0A0D9SFF8;B4DZ84;D3DX48;D3DX49;Q14168;Q14168-2;Q14168-3;Q14168-4;Q14168-5;Q14168-6			NUCLEUS
A0A0A0MRV9;A0A0A0MRW3;Q5T593;Q8IW50;Q8IW50-7	FAM219A	A0A0A0MRV9;A0A0A0MRW3;Q5T593;Q8IW50;Q8IW50-7			ENDOSOME-VESICLE
A0A0A0MRY9;Q96AQ7;Q96AQ7-2;Q96AQ7-4	CIDEC	A0A0A0MRY9;Q96AQ7;Q96AQ7-2;Q96AQ7-4	LD		LD
A0A0A0MRZ1	UNKL	A0A0A0MRZ1			CYTOPLASM
A0A0A0MRZ4;E7EMV7;Q15025;Q15025-2;Q15025-3;Q15025-4;Q15025-5;Q15025-6;Q15025-7;Q15025-8	TNIP1	A0A0A0MRZ4;E7EMV7;Q15025;Q15025-2;Q15025-3;Q15025-4;Q15025-5;Q15025-6;Q15025-7;Q15025-8		Cytosol	CYTOPLASM
A0A0A0MS31;Q14790;Q14790-2;Q14790-4;Q14790-7;Q14790-8;Q14790-9	CASP8	A0A0A0MS31;Q14790;Q14790-2;Q14790-4;Q14790-7;Q14790-8;Q14790-9	PROTEIN-COMPLEX		CYTOPLASM
A0A0A0MS45;A0A6I8PIQ6;J3KNI1;Q9H9E3	COG4	A0A0A0MS45;A0A6I8PIQ6;J3KNI1;Q9H9E3	PROTEIN-COMPLEX	Protein Complex	CYTOPLASM
A0A0A0MSC1;O60266	ADCY3	A0A0A0MSC1;O60266			GOLGI APPARATUS
A0A0A0MSI2;B3KPJ4;Q8IXK0;Q8IXK0-2;Q8IXK0-4;Q8IXK0-5	PHC2	A0A0A0MSI2;B3KPJ4;Q8IXK0;Q8IXK0-2;Q8IXK0-4;Q8IXK0-5	NUCLEUS		NUCLEUS
A0A0A0MSI8;O00471	EXOC5	A0A0A0MSI8;O00471		Cytosol	PROTEIN-COMPLEX
A0A0A0MSJ9;Q15283;Q15283-2	RASA2	A0A0A0MSJ9;Q15283;Q15283-2		ER	LD
A0A0A0MSN4;P12821;P12821-2	ACE	A0A0A0MSN4;P12821;P12821-2		PM	PEROXISOME
A0A0A0MSP4;Q86WC4	OSTM1	A0A0A0MSP4;Q86WC4	LYSOSOME	PM	LYSOSOME
A0A0A0MSQ0;P13797;P13797-2	PLS3	A0A0A0MSQ0;P13797;P13797-2	CYTOPLASM	Cytosol	CYTOPLASM
A0A0A0MSS8;P42330	AKR1C3	A0A0A0MSS8;P42330	CYTOPLASM	Cytosol	CYTOPLASM
A0A0A0MSU2;A0A1C7CYX1;Q6PJG2	MIDEAS	A0A0A0MSU2;A0A1C7CYX1;Q6PJG2			NUCLEUS
A0A0A0MSU4;O94911-3	ABCA8	A0A0A0MSU4;O94911-3		PM	ER
A0A0A0MSV9;A0A0G2JH37;A0A0G2JKZ1;A2AB90;O15533;O15533-3	TAPBP	A0A0A0MSV9;A0A0G2JH37;A0A0G2JKZ1;A2AB90;O15533;O15533-3	ER	ER	ER
A0A0A0MSZ3;A0A0A0MT29;A0A0A0MT41;C9JP92;Q9NUJ7;X6RFG1	PLCXD1	A0A0A0MSZ3;A0A0A0MT29;A0A0A0MT41;C9JP92;Q9NUJ7;X6RFG1		PM	GOLGI APPARATUS
A0A0A0MT02;P18615;P18615-3	NELFE	A0A0A0MT02;P18615;P18615-3		Protein Complex	CYTOPLASM
A0A0A0MT32;P38571;P38571-2	LIPA	A0A0A0MT32;P38571;P38571-2	LYSOSOME	Lysosome	LYSOSOME
A0A0A0MT33;Q9UPN6	SCAF8	A0A0A0MT33;Q9UPN6		Nucleus	NUCLEUS
A0A0A0MT35;A0A2P0CTB1;Q8TBF2;Q8TBF2-3	PRXL2B	A0A0A0MT35;A0A2P0CTB1;Q8TBF2;Q8TBF2-3	CYTOPLASM	Cytosol	CYTOPLASM
A0A0A0MT61;G5E979;H7BYM2;Q8WYN0;Q8WYN0-3;Q8WYN0-5	ATG4A	A0A0A0MT61;G5E979;H7BYM2;Q8WYN0;Q8WYN0-3;Q8WYN0-5			PROTEIN-COMPLEX
A0A0A0MT71;Q6UX73;Q6UX73-2	C16orf89	A0A0A0MT71;Q6UX73;Q6UX73-2			GOLGI APPARATUS
A0A0A0MT72;Q9BSQ5;Q9BSQ5-2	CCM2	A0A0A0MT72;Q9BSQ5;Q9BSQ5-2		Cytosol	CYTOPLASM
A0A0A0MT83;P26440	IVD	A0A0A0MT83;P26440	MITOCHONDRIA	Mitochondria	MITOCHONDRIA
A0A0A0MTB8;Q8NI36	WDR36	A0A0A0MTB8;Q8NI36	NUCLEUS	Nucleus	NUCLEUS
A0A0A0MTC2;D6RA37;D6RDV0;D6RIY7;Q13454;Q13454-2	TUSC3	A0A0A0MTC2;D6RA37;D6RDV0;D6RIY7;Q13454;Q13454-2		PM	ER
A0A0A0MTH3;Q13418	ILK	A0A0A0MTH3;Q13418		Protein Complex	CYTOPLASM
A0A0A0MTH9;O14981	BTAF1	A0A0A0MTH9;O14981		Cytosol	NUCLEUS
A0A0A0MTJ5;Q01973	ROR1	A0A0A0MTJ5;Q01973			PM
A0A0A0MTN0;Q13617;Q13617-2	CUL2	A0A0A0MTN0;Q13617;Q13617-2	PROTEIN-COMPLEX	Protein Complex	CYTOPLASM
A0A0A0MTR7;Q63HN8	RNF213	A0A0A0MTR7;Q63HN8	CYTOPLASM	Protein Complex	PROTEIN-COMPLEX
A0A0A0MTS7;Q8WZ42;Q8WZ42-11;Q8WZ42-12;Q8WZ42-13;Q8WZ42-2;Q8WZ42-4;Q8WZ42-5;Q8WZ42-7;Q8WZ42-8	TTN	A0A0A0MTS7;Q8WZ42;Q8WZ42-11;Q8WZ42-12;Q8WZ42-13;Q8WZ42-2;Q8WZ42-4;Q8WZ42-5;Q8WZ42-7;Q8WZ42-8			MITOCHONDRIA
A0A0A0MTU3;Q4ZIN3;Q4ZIN3-2	TMEM259	A0A0A0MTU3;Q4ZIN3;Q4ZIN3-2		ER	ER
A0A0A6YYC0;E9PJN1;O75676;O75676-2	RPS6KA4	A0A0A6YYC0;E9PJN1;O75676;O75676-2	PROTEIN-COMPLEX	Golgi	CYTOPLASM
A0A0A6YYC7;Q96JP5;Q96JP5-2	ZFP91-CNTF;ZFP91;ZFP91	A0A0A6YYC7;Q96JP5;Q96JP5-2		Nucleus	NUCLEUS
A0A0A6YYG5;Q53S48;Q9Y6Q2;Q9Y6Q2-2;Q9Y6Q2-3	STON1-GTF2A1L;STON1-GTF2A1L;STON1;STON1;STON1	A0A0A6YYG5;Q53S48;Q9Y6Q2;Q9Y6Q2-2;Q9Y6Q2-3		Cytosol	CYTOPLASM
A0A0A6YYH1;Q7Z6K5;Q7Z6K5-2	C15orf38-AP3S2;ARPIN;ARPIN	A0A0A6YYH1;Q7Z6K5;Q7Z6K5-2		Cytosol	CYTOPLASM
A0A0A6YYI3;A0A0B4J1V8;A8MV53;Q9NQ55;Q9NQ55-2;Q9NQ55-3	PPAN-P2RY11;PPAN-P2RY11;PPAN;PPAN;PPAN;PPAN	A0A0A6YYI3;A0A0B4J1V8;A8MV53;Q9NQ55;Q9NQ55-2;Q9NQ55-3		Nucleus	NUCLEUS
A0A0A6YYJ5	MACF1	A0A0A6YYJ5		PM	NUCLEUS
A0A0A6YYJ8;Q96HJ9-2	LUC7L2;FMC1	A0A0A6YYJ8;Q96HJ9-2		Cytosol	CYTOPLASM
A0A0A6YYL4;P57737-3	CORO7-PAM16;CORO7	A0A0A6YYL4;P57737-3		Mitochondria	CYTOPLASM
A0A0B4J1R2;Q9H6R3	ACSS3	A0A0B4J1R2;Q9H6R3	MITOCHONDRIA	Mitochondria	MITOCHONDRIA
A0A0B4J1R7;Q96B45	BORCS7-ASMT;BORCS7	A0A0B4J1R7;Q96B45	CYTOPLASM	Cytosol	CYTOPLASM
A0A0B4J1S8;Q9UBF8;Q9UBF8-2;Q9UBF8-3	PI4KB	A0A0B4J1S8;Q9UBF8;Q9UBF8-2;Q9UBF8-3		Cytosol	CYTOPLASM
A0A0B4J1Z1;C9JAB2;Q16629;Q16629-2;Q16629-3;Q16629-4	SRSF7	A0A0B4J1Z1;C9JAB2;Q16629;Q16629-2;Q16629-3;Q16629-4	NUCLEUS	Nucleus	NUCLEUS
A0A0B4J221;E9PR99;Q96LU5	IMMP1L	A0A0B4J221;E9PR99;Q96LU5	MITOCHONDRIA		MITOCHONDRIA
A0A0B4J223;A0A2R8Y5M4;A0A2R8Y646;A0A2R8YD57;A0A590UJK9;A0A590UK40;A0A6Q8PFJ7;A8MYG7;H7C3B7;Q9UPM9;Q9UPM9-2	B9D1	A0A0B4J223;A0A2R8Y5M4;A0A2R8Y646;A0A2R8YD57;A0A590UJK9;A0A590UK40;A0A6Q8PFJ7;A8MYG7;H7C3B7;Q9UPM9;Q9UPM9-2			CYTOPLASM
A0A0B4J294;H3BP13;Q9UL33;Q9UL33-2	TRAPPC2L	A0A0B4J294;H3BP13;Q9UL33;Q9UL33-2	PROTEIN-COMPLEX	Translation	PROTEIN-COMPLEX
A0A0B4J297;I3L4V0;Q9BRA0;Q9BRA0-2	NAA38	A0A0B4J297;I3L4V0;Q9BRA0;Q9BRA0-2		Protein Complex	TRANSLATION
A0A0B4J2A0	ENSG00000262304	A0A0B4J2A0		Cytosol	CYTOPLASM
A0A0B4J2A2	PPIAL4C	A0A0B4J2A2			nan
A0A0B4J2C3;P13693;Q5W0H4	TPT1	A0A0B4J2C3;P13693;Q5W0H4	CYTOPLASM	Cytosol	CYTOPLASM
A0A0B4J2D5;P0DPI2	GATD3B;GATD3A	A0A0B4J2D5;P0DPI2		Mitochondria	MITOCHONDRIA
A0A0B4J2E5;Q15269	LOC102724159;PWP2	A0A0B4J2E5;Q15269	NUCLEUS		NUCLEUS
A0A0B4J2F0	PIGBOS1	A0A0B4J2F0			nan
A0A0B4J2F8;E2QRJ6;F6S314;P52435	POLR2J3;POLR2J3;POLR2J;POLR2J	A0A0B4J2F8;E2QRJ6;F6S314;P52435		Protein Complex	CYTOPLASM
A0A0C4DFL7;Q16850	CYP51A1	A0A0C4DFL7;Q16850	ER	ER	ER
A0A0C4DFL8;F5GX28;O94953	KDM4B	A0A0C4DFL8;F5GX28;O94953		Nucleus	NUCLEUS
A0A0C4DFM0;G3V4T6	GSTZ1	A0A0C4DFM0;G3V4T6		Cytosol	MITOCHONDRIA
A0A0C4DFM1;Q92544	TM9SF4	A0A0C4DFM1;Q92544	GOLGI APPARATUS	Golgi	GOLGI APPARATUS
A0A0C4DFM2;Q6ZN55;Q6ZN55-2	ZNF574	A0A0C4DFM2;Q6ZN55;Q6ZN55-2		Cytosol	NUCLEUS
A0A0C4DFM7;Q5TAX3	TUT4	A0A0C4DFM7;Q5TAX3			TRANSLATION
A0A0C4DFN3;Q99685	MGLL	A0A0C4DFN3;Q99685		Cytosol	CYTOPLASM
A0A0C4DFR3;Q9NQR1;Q9NQR1-2	KMT5A	A0A0C4DFR3;Q9NQR1;Q9NQR1-2			LD
A0A0C4DFS6;Q9C004	SPRY4	A0A0C4DFS6;Q9C004	GOLGI APPARATUS	Cytosol	ENDOSOME-VESICLE
A0A0C4DFT3;A0A590UJ08;A0A590UJD9;Q12959-2;Q12959-4	DLG1	A0A0C4DFT3;A0A590UJ08;A0A590UJD9;Q12959-2;Q12959-4	PM	PM	PM
A0A0C4DFV0;Q9H469	FBXL15	A0A0C4DFV0;Q9H469		Cytosol	CYTOPLASM
A0A0C4DFX4;Q6ZRS2;Q6ZRS2-2;Q6ZRS2-3	ENSG00000282034;SRCAP;SRCAP;SRCAP	A0A0C4DFX4;Q6ZRS2;Q6ZRS2-2;Q6ZRS2-3		Cytosol	NUCLEUS
A0A0C4DFX9;Q9H3P2	NELFA	A0A0C4DFX9;Q9H3P2	NUCLEUS	Nucleus	NUCLEUS
A0A0C4DFZ2;P15289;P15289-2	ARSA	A0A0C4DFZ2;P15289;P15289-2	LYSOSOME	Mitochondria	LYSOSOME
A0A0C4DFZ9;Q58A45;Q58A45-3	PAN3	A0A0C4DFZ9;Q58A45;Q58A45-3			ENDOSOME-VESICLE
A0A0C4DG17;C9J9K3;P08865	RPSA	A0A0C4DG17;C9J9K3;P08865	TRANSLATION	Translation	TRANSLATION
A0A0C4DG21;A0A7D9NKC8;E7EP65;E7EW77;E9PEZ7;F8WAL6;Q9NYB9;Q9NYB9-2;Q9NYB9-4	ABI2	A0A0C4DG21;A0A7D9NKC8;E7EP65;E7EW77;E9PEZ7;F8WAL6;Q9NYB9;Q9NYB9-2;Q9NYB9-4		Cytosol	CYTOPLASM
A0A0C4DG40;Q8NF91-4	SYNE1	A0A0C4DG40;Q8NF91-4		Nucleus	ER
A0A0C4DG49	PVR	A0A0C4DG49		Peroxisome	PM
A0A0C4DG51;Q9NP80;Q9NP80-3	PNPLA8	A0A0C4DG51;Q9NP80;Q9NP80-3		Mitochondria	MITOCHONDRIA
A0A0C4DG62;F8WCT1;Q66PJ3;Q66PJ3-2;Q66PJ3-3;Q66PJ3-7	ARL6IP4	A0A0C4DG62;F8WCT1;Q66PJ3;Q66PJ3-2;Q66PJ3-3;Q66PJ3-7		Protein Complex	ER
A0A0C4DG89;Q7L014	DDX46	A0A0C4DG89;Q7L014	NUCLEUS	Nucleus	NUCLEUS
A0A0C4DG91;C9J9V6;O75414	NME6	A0A0C4DG91;C9J9V6;O75414	MITOCHONDRIA	Mitochondria	MITOCHONDRIA
A0A0C4DGA2;O75521;O75521-2	ECI2	A0A0C4DGA2;O75521;O75521-2	MITOCHONDRIA	ER	MITOCHONDRIA
A0A0C4DGA6;Q14527;Q14527-2	HLTF	A0A0C4DGA6;Q14527;Q14527-2	NUCLEUS	Protein Complex	TRANSLATION
A0A0C4DGA7;O94929-3	ABLIM3	A0A0C4DGA7;O94929-3			ENDOSOME-VESICLE
A0A0C4DGB0;Q9UIL1;Q9UIL1-2;Q9UIL1-3	SCOC	A0A0C4DGB0;Q9UIL1;Q9UIL1-2;Q9UIL1-3		Cytosol	CYTOPLASM
A0A0C4DGB6;P02768;P02768-1	ALB;ALB;SWISS-PROT:P02768-1	A0A0C4DGB6;P02768;			PROTEIN-COMPLEX
A0A0C4DGB9	PPA2	A0A0C4DGB9	MITOCHONDRIA	Mitochondria	MITOCHONDRIA
A0A0C4DGG1;Q9UKS6	PACSIN3	A0A0C4DGG1;Q9UKS6		Translation	TRANSLATION
A0A0C4DGH0;Q5ZPR3	CD276	A0A0C4DGH0;Q5ZPR3	PM	PM	ER
A0A0C4DGH3;Q9Y6R0	NUMBL	A0A0C4DGH3;Q9Y6R0		Cytosol	TRANSLATION
A0A0C4DGH8;A0A0C4DGY3;H0YJX0;Q8TAM2-3;Q8TAM2-4	TTC8	A0A0C4DGH8;A0A0C4DGY3;H0YJX0;Q8TAM2-3;Q8TAM2-4		Cytosol	PROTEIN-COMPLEX
A0A0C4DGN6;J3QRU8;Q9Y2X7;Q9Y2X7-3	GIT1	A0A0C4DGN6;J3QRU8;Q9Y2X7;Q9Y2X7-3		Cytosol	PROTEIN-COMPLEX
A0A0C4DGP0;E7EU35;Q9UKF7-2	PITPNC1	A0A0C4DGP0;E7EU35;Q9UKF7-2		Nucleus	CYTOPLASM
A0A0C4DGQ5;P04632	CAPNS1	A0A0C4DGQ5;P04632	CYTOPLASM	Cytosol	CYTOPLASM
A0A0C4DGQ8;Q6IAN0	DHRS7B	A0A0C4DGQ8;Q6IAN0	ER	ER	ER
A0A0C4DGS1;P39656	DDOST	A0A0C4DGS1;P39656		ER	ER
A0A0C4DGT3;A0A2R8Y7T6;A0A3B3IRZ4;A0A3B3IU98;Q6DN90;Q6DN90-2;Q6DN90-3	IQSEC1	A0A0C4DGT3;A0A2R8Y7T6;A0A3B3IRZ4;A0A3B3IU98;Q6DN90;Q6DN90-2;Q6DN90-3		Cytosol	CYTOPLASM
A0A0C4DGT4	LPCAT4	A0A0C4DGT4			NUCLEUS
A0A0C4DGV4;E9PLX3;O43504;R4GMU8	LAMTOR5	A0A0C4DGV4;E9PLX3;O43504;R4GMU8	LYSOSOME	PM	PM
A0A0C4DGV9;P49917	LIG4	A0A0C4DGV9;P49917			PROTEIN-COMPLEX
A0A0C4DGW0;A0A3B3IRK3;B4DGY6;H7C5F7;Q9NV92	NDFIP2	A0A0C4DGW0;A0A3B3IRK3;B4DGY6;H7C5F7;Q9NV92		Golgi	ENDOSOME-VESICLE
A0A0C4DGW2;P57768	SNX16	A0A0C4DGW2;P57768	ENDOSOME-VESICLE		ENDOSOME-VESICLE
A0A0C4DH01;Q9NVU0;Q9NVU0-2;Q9NVU0-3;Q9NVU0-4;Q9NVU0-5	POLR3E	A0A0C4DH01;Q9NVU0;Q9NVU0-2;Q9NVU0-3;Q9NVU0-4;Q9NVU0-5	NUCLEUS	Protein Complex	NUCLEUS
A0A0C4DH14;Q6P5X5	C22orf39	A0A0C4DH14;Q6P5X5			nan
A0A0C4DH16;B8ZZS0;H7BXT7;Q9NYM9	BET1L	A0A0C4DH16;B8ZZS0;H7BXT7;Q9NYM9	GOLGI APPARATUS	Golgi	GOLGI APPARATUS
A0A0D9SEI0;Q9P0P8	MTRES1	A0A0D9SEI0;Q9P0P8	MITOCHONDRIA		MITOCHONDRIA
A0A0D9SEI3;A0A0D9SEN2;A0A0D9SER5;P21127;P21127-2;P21127-3;P21127-8;Q5QPR3;Q9UQ88;Q9UQ88-2;Q9UQ88-3;Q9UQ88-4	CDK11B;CDK11B;CDK11B;CDK11B;CDK11B;CDK11B;CDK11B;CDK11A;CDK11A;CDK11A;CDK11A;CDK11A	A0A0D9SEI3;A0A0D9SEN2;A0A0D9SER5;P21127;P21127-2;P21127-3;P21127-8;Q5QPR3;Q9UQ88;Q9UQ88-2;Q9UQ88-3;Q9UQ88-4		Cytosol	NUCLEUS
A0A0D9SEJ5;F5GY05;Q96EK7	FAM120B	A0A0D9SEJ5;F5GY05;Q96EK7		Cytosol	PROTEIN-COMPLEX
A0A0D9SEN1;B4DLR2;Q12884	FAP	A0A0D9SEN1;B4DLR2;Q12884	PM	PM	LYSOSOME
A0A0D9SES8;H0YKN8;H0YKT5;H0YL70;H0YNT2;Q04726;Q04726-2;Q04726-3;Q04726-4;Q04726-5;Q04726-6;Q04726-7	TLE3	A0A0D9SES8;H0YKN8;H0YKT5;H0YL70;H0YNT2;Q04726;Q04726-2;Q04726-3;Q04726-4;Q04726-5;Q04726-6;Q04726-7			NUCLEUS
A0A0D9SEU5;Q6VN20;Q6VN20-3;R4GMX8	RANBP10	A0A0D9SEU5;Q6VN20;Q6VN20-3;R4GMX8	PROTEIN-COMPLEX	Protein Complex	PROTEIN-COMPLEX
A0A0D9SF44;A0A0R4J2E2;Q9Y3T6;Q9Y3T6-3	R3HCC1	A0A0D9SF44;A0A0R4J2E2;Q9Y3T6;Q9Y3T6-3		Cytosol	LD
A0A0D9SF53;A0A0D9SFB3;A0A0D9SG12;A0A2R8Y4A4;A0A2R8YF78;A0A2R8YFS5;O00571	DDX3X	A0A0D9SF53;A0A0D9SFB3;A0A0D9SG12;A0A2R8Y4A4;A0A2R8YF78;A0A2R8YFS5;O00571		Endosome	TRANSLATION
A0A0D9SF60;Q99569;Q99569-2	PKP4	A0A0D9SF60;Q99569;Q99569-2		Mitochondria	MITOCHONDRIA
A0A0D9SFB1;A0A0D9SFE4;A0A0U1RQP1;Q05193;Q05193-2;Q05193-3;Q05193-5	DNM1	A0A0D9SFB1;A0A0D9SFE4;A0A0U1RQP1;Q05193;Q05193-2;Q05193-3;Q05193-5		Cytosol	PROTEIN-COMPLEX
A0A0D9SFK2;Q92614;Q92614-3;Q92614-4	MYO18A	A0A0D9SFK2;Q92614;Q92614-3;Q92614-4		Protein Complex	MITOCHONDRIA
A0A0D9SFW8	HLA-F	A0A0D9SFW8			GOLGI APPARATUS
A0A0D9SG04;A0A0X1KG75;A0A590PXD8;Q53SF7;Q53SF7-2;Q53SF7-3	COBLL1	A0A0D9SG04;A0A0X1KG75;A0A590PXD8;Q53SF7;Q53SF7-2;Q53SF7-3		Cytosol	CYTOPLASM
A0A0D9SG71;P49459;P49459-3	UBE2A	A0A0D9SG71;P49459;P49459-3		Cytosol	CYTOPLASM
A0A0D9SG79;Q9NZ09;Q9NZ09-3;Q9NZ09-4	UBAP1	A0A0D9SG79;Q9NZ09;Q9NZ09-3;Q9NZ09-4		Cytosol	CYTOPLASM
A0A0D9SGD6;B0QZE2;B7Z2J6;E7ENI9;E7EV75;Q15326;Q15326-2;Q15326-3;Q15326-4;Q15326-5;Q15326-6	ZMYND11	A0A0D9SGD6;B0QZE2;B7Z2J6;E7ENI9;E7EV75;Q15326;Q15326-2;Q15326-3;Q15326-4;Q15326-5;Q15326-6		Nucleus	NUCLEUS
A0A0D9SGF6	SPTAN1	A0A0D9SGF6		Protein Complex	PROTEIN-COMPLEX
A0A0D9SGJ6;C9JFZ1;J3KPK1;J3KQV8;O43426;O43426-2;O43426-4	SYNJ1	A0A0D9SGJ6;C9JFZ1;J3KPK1;J3KQV8;O43426;O43426-2;O43426-4			PROTEIN-COMPLEX
A0A0G2JH68;O60610	DIAPH1	A0A0G2JH68;O60610		Cytosol	CYTOPLASM
A0A0G2JHC2;Q6NYC8	PPP1R18	A0A0G2JHC2;Q6NYC8		Protein Complex	CYTOPLASM
A0A0G2JHL0;A0A0G2JK44;A0A140T9E9;A0A140T9F7;A0A140T9V2;H0Y6K2;P25440;P25440-2;P25440-3;P25440-4;U3KQA6	BRD2	A0A0G2JHL0;A0A0G2JK44;A0A140T9E9;A0A140T9F7;A0A140T9V2;H0Y6K2;P25440;P25440-2;P25440-3;P25440-4;U3KQA6			NUCLEUS
A0A0G2JIA5;A0A0G2JL52;A0A140T8Y0;A0A140TA35;A0A140TA36;B4E0K6;Q5ST30;Q5ST30-4	VARS2	A0A0G2JIA5;A0A0G2JL52;A0A140T8Y0;A0A140TA35;A0A140TA36;B4E0K6;Q5ST30;Q5ST30-4	MITOCHONDRIA		MITOCHONDRIA
A0A0G2JIR1;A0A0G2JIS2;A0A0G2JK64;A2ABF8;A2ABF9;Q96KQ7;Q96KQ7-2	EHMT2	A0A0G2JIR1;A0A0G2JIS2;A0A0G2JK64;A2ABF8;A2ABF9;Q96KQ7;Q96KQ7-2			NUCLEUS
A0A0G2JIW1;P0DMV8;P0DMV9	HSPA1B;HSPA1A;HSPA1B	A0A0G2JIW1;P0DMV8;P0DMV9	CYTOPLASM	Cytosol	CYTOPLASM
A0A0G2JJD3;O95870	ABHD16A	A0A0G2JJD3;O95870		ER	ER
A0A0G2JKR7;A0A5F9ZHH6;P19793;P19793-2;P28702;P28702-3	RXRB;RXRA;RXRA;RXRA;RXRB;RXRB	A0A0G2JKR7;A0A5F9ZHH6;P19793;P19793-2;P28702;P28702-3		Cytosol	CYTOPLASM
A0A0G2JMI0;A0A0G2JNU6;A0A0G2JP18;A0A140T8W3;Q6GTX8	LAIR1	A0A0G2JMI0;A0A0G2JNU6;A0A0G2JP18;A0A140T8W3;Q6GTX8	PM	PM	PM
A0A0G2JMX7;A0A0G2JPD5;A0A0G2JQJ7;A0A0G2JS76;P10636;P10636-9	MAPT	A0A0G2JMX7;A0A0G2JPD5;A0A0G2JQJ7;A0A0G2JS76;P10636;P10636-9		Cytosol	CYTOPLASM
A0A0G2JNW7;Q9Y666	SLC12A7	A0A0G2JNW7;Q9Y666		ER	ENDOSOME-VESICLE
A0A0G2JNZ2;A0A669KB89;Q14160	SCRIB	A0A0G2JNZ2;A0A669KB89;Q14160		PM	LD
A0A0G2JP78;O75943-4	RAD17	A0A0G2JP78;O75943-4			NUCLEUS
A0A0G2JPR0;P0C0L4	C4A	A0A0G2JPR0;P0C0L4			ER
A0A0G2JQ41;A0A1C7CYZ0;Q12979;Q12979-2;Q12979-4	ABR	A0A0G2JQ41;A0A1C7CYZ0;Q12979;Q12979-2;Q12979-4		Cytosol	CYTOPLASM
A0A0G2JQT1;A0A0G2JR96	CYFIP1	A0A0G2JQT1;A0A0G2JR96			nan
A0A0G2JR66;B7WPD9;Q2KJY2;Q2KJY2-2	KIF26B	A0A0G2JR66;B7WPD9;Q2KJY2;Q2KJY2-2			LD
A0A0J9YVP6;Q9UHX1-2	PUF60	A0A0J9YVP6;Q9UHX1-2	NUCLEUS	Nucleus	NUCLEUS
A0A0J9YW18;F6RP06;Q12983	BNIP3	A0A0J9YW18;F6RP06;Q12983	ER	Mitochondria	ER
A0A0J9YWB6;A0A0J9YWJ4;K7EJD2;Q9Y5B0;Q9Y5B0-4	CTDP1	A0A0J9YWB6;A0A0J9YWJ4;K7EJD2;Q9Y5B0;Q9Y5B0-4			NUCLEUS
A0A0J9YWD5;A0A0J9YX88;A0A0J9YYB5;B7ZM65;E9PJ24;F8WEF5;Q9P1Y6;Q9P1Y6-2;Q9P1Y6-3	PHRF1	A0A0J9YWD5;A0A0J9YX88;A0A0J9YYB5;B7ZM65;E9PJ24;F8WEF5;Q9P1Y6;Q9P1Y6-2;Q9P1Y6-3			NUCLEUS
A0A0J9YWE1	EPB41L3	A0A0J9YWE1			nan
A0A0J9YWL0;Q9Y4K1	CRYBG1	A0A0J9YWL0;Q9Y4K1		Protein Complex	TRANSLATION
A0A0J9YX34;A0A6Q8PF18;A0A6Q8PF63;A0A6Q8PFB0;A0A6Q8PFI4;A0A6Q8PFV0;A0A6Q8PGE9;A0A6Q8PGL5;A0A6Q8PH06;A0A6Q8PHP4;C9J084;Q9C040;Q9C040-2	TRIM2;ENSG00000288637;TRIM2;TRIM2;TRIM2;TRIM2;TRIM2;TRIM2;ENSG00000288637;TRIM2;TRIM2;TRIM2;TRIM2	A0A0J9YX34;A0A6Q8PF18;A0A6Q8PF63;A0A6Q8PFB0;A0A6Q8PFI4;A0A6Q8PFV0;A0A6Q8PGE9;A0A6Q8PGL5;A0A6Q8PH06;A0A6Q8PHP4;C9J084;Q9C040;Q9C040-2		Protein Complex	TRANSLATION
A0A0J9YX62;O75190-3	DNAJB6	A0A0J9YX62;O75190-3		Cytosol	ENDOSOME-VESICLE
A0A0J9YX66;A0A0J9YXJ0;A0A1B0GU44;A0A1B0GUN8;E9PC62;O95319;O95319-2;O95319-3;O95319-4;O95319-5;Q5VZZ6;V9GYD9	CELF2	A0A0J9YX66;A0A0J9YXJ0;A0A1B0GU44;A0A1B0GUN8;E9PC62;O95319;O95319-2;O95319-3;O95319-4;O95319-5;Q5VZZ6;V9GYD9		Cytosol	TRANSLATION
A0A0J9YXF2;Q15165	PON2	A0A0J9YXF2;Q15165	ER	PM	ER
A0A0J9YXM6;Q562E7	WDR81	A0A0J9YXM6;Q562E7		Translation	ER
A0A0J9YXN7	PLIN4	A0A0J9YXN7	LD	Cytosol	CYTOPLASM
A0A0J9YY72;A0A1W2PQQ1;Q5HYW2	NHSL2	A0A0J9YY72;A0A1W2PQQ1;Q5HYW2			PROTEIN-COMPLEX
A0A0J9YYJ3;Q9Y519	TMEM184B	A0A0J9YYJ3;Q9Y519			TRANSLATION
A0A0R4J2F2;D6R9S8;D6RA76;D6RC11;D6RCE6;D6RCR8;D6RDI6;D6RDP6;D6RDY1;D6RFX6;D6RHU6;D6RIU2;H0Y8T9;Q9NY35;Q9NY35-2	CLDND1	A0A0R4J2F2;D6R9S8;D6RA76;D6RC11;D6RCE6;D6RCR8;D6RDI6;D6RDP6;D6RDY1;D6RFX6;D6RHU6;D6RIU2;H0Y8T9;Q9NY35;Q9NY35-2			PM
A0A0R4J2F6;Q12894;Q12894-2	IFRD2	A0A0R4J2F6;Q12894;Q12894-2		Translation	TRANSLATION
A0A0U1RQD2;Q6ZUS6;Q6ZUS6-2;Q6ZUS6-4;Q6ZUS6-5;Q6ZUS6-6	CCDC149	A0A0U1RQD2;Q6ZUS6;Q6ZUS6-2;Q6ZUS6-4;Q6ZUS6-5;Q6ZUS6-6		Protein Complex	GOLGI APPARATUS
A0A0U1RQE4;A0A494C1M0	SH3D19	A0A0U1RQE4;A0A494C1M0	CYTOPLASM	Cytosol	CYTOPLASM
A0A0U1RQF0	FASN	A0A0U1RQF0			PROTEIN-COMPLEX
A0A0U1RQK7	EIF4G3	A0A0U1RQK7		Protein Complex	TRANSLATION
A0A0U1RQK9	ALDH1B1	A0A0U1RQK9	MITOCHONDRIA		MITOCHONDRIA
A0A0U1RQQ9;Q6P3W7	SCYL2	A0A0U1RQQ9;Q6P3W7		Cytosol	CYTOPLASM
A0A0U1RQT7;A0A0U1RQY7;Q8IXA3;Q9HCP0;Q9HCP0-2;U3KQA5;U3KQB3	CSNK1G1	A0A0U1RQT7;A0A0U1RQY7;Q8IXA3;Q9HCP0;Q9HCP0-2;U3KQA5;U3KQB3		PM	PM
A0A0U1RQT8;Q8TCZ2;Q8TCZ2-2;Q8TCZ2-3;Q8TCZ2-5	CD99L2	A0A0U1RQT8;Q8TCZ2;Q8TCZ2-2;Q8TCZ2-3;Q8TCZ2-5		PM	PM
A0A0U1RQX8;A0A0U1RR39;A0A1B0GW38;P22681	CBL	A0A0U1RQX8;A0A0U1RR39;A0A1B0GW38;P22681	CYTOPLASM	Cytosol	CYTOPLASM
A0A0U1RR06;Q9Y484;Q9Y484-2;Q9Y484-3	WDR45	A0A0U1RR06;Q9Y484;Q9Y484-2;Q9Y484-3		Cytosol	CYTOPLASM
A0A0U1RR70;G5E9L9;Q8N568;Q8N568-2;Q8N568-3	DCLK2	A0A0U1RR70;G5E9L9;Q8N568;Q8N568-2;Q8N568-3			CYTOPLASM
A0A0U1RRA6;B5MCG9;B5MCU0;H7C0E9;Q9Y2K5;Q9Y2K5-2;Q9Y2K5-3	R3HDM2	A0A0U1RRA6;B5MCG9;B5MCU0;H7C0E9;Q9Y2K5;Q9Y2K5-2;Q9Y2K5-3			LD
A0A0U1RRB6;Q9Y2D4	EXOC6B	A0A0U1RRB6;Q9Y2D4		Protein Complex	PROTEIN-COMPLEX
A0A0U1RRB9;F2Z2V1;Q96C11;Q96C11-3	FGGY	A0A0U1RRB9;F2Z2V1;Q96C11;Q96C11-3		Cytosol	CYTOPLASM
A0A0U1RRH6;O94880-2	PHF14	A0A0U1RRH6;O94880-2		Nucleus	LD
A0A0U1RRK1;A0A286YF11;F6XEV2;Q9BPX6;Q9BPX6-2;Q9BPX6-3	MICU1	A0A0U1RRK1;A0A286YF11;F6XEV2;Q9BPX6;Q9BPX6-2;Q9BPX6-3	MITOCHONDRIA	Mitochondria	MITOCHONDRIA
A0A0U1RRL7	MMP24OS	A0A0U1RRL7		PM	MITOCHONDRIA
A0A0U1RRL8;Q8TB22;Q8TB22-2	SPATA20	A0A0U1RRL8;Q8TB22;Q8TB22-2		Mitochondria	MITOCHONDRIA
A0A0U1RRM1;Q8WXI9	GATAD2B	A0A0U1RRM1;Q8WXI9			NUCLEUS
A0A140T8X5;A0A140TA37;B7ZLI8;P49842;P49842-2;P49842-3;P49842-4	STK19	A0A140T8X5;A0A140TA37;B7ZLI8;P49842;P49842-2;P49842-3;P49842-4			NUCLEUS
A0A140T8Y4;Q5SPM2	HLA-A	A0A140T8Y4;Q5SPM2	PM		ER
A0A140T913;A0A140T9I0;A0A140T9X5;Q53Z42	HLA-A	A0A140T913;A0A140T9I0;A0A140T9X5;Q53Z42	PM	PM	ER
A0A140T9G8;Q0P5T2;Q5SQH8;Q5SQH8-2;Q5SQH8-3;Q5SQH8-4	C6orf136	A0A140T9G8;Q0P5T2;Q5SQH8;Q5SQH8-2;Q5SQH8-3;Q5SQH8-4		Mitochondria	GOLGI APPARATUS
A0A140T9J9	HLA-C	A0A140T9J9			ER
A0A140T9M0	HLA-C	A0A140T9M0			GOLGI APPARATUS
A0A140T9T7;Q03518	TAP1	A0A140T9T7;Q03518	ER	ER	ER
A0A140TA62;A0A140TA69;Q8IUT8	ENSG00000262748;KRT34;TREMBL:Q8IUT8	A0A140TA62;A0A140TA69;			LD
A0A140TA76	LSM14A	A0A140TA76			TRANSLATION
A0A140TA86;Q5XKP0	MICOS13	A0A140TA86;Q5XKP0	MITOCHONDRIA	Mitochondria	MITOCHONDRIA
A0A182DWF2;A0A182DWF3;D3YTF8;Q9NNW7;Q9NNW7-2	TXNRD2	A0A182DWF2;A0A182DWF3;D3YTF8;Q9NNW7;Q9NNW7-2	MITOCHONDRIA	Mitochondria	MITOCHONDRIA
A0A1B0GTC3;A0A1B0GVH5;Q9C0B1	FTO	A0A1B0GTC3;A0A1B0GVH5;Q9C0B1	CYTOPLASM	Cytosol	CYTOPLASM
A0A1B0GTG2;A0A1B0GW77;P49419;P49419-2	ALDH7A1	A0A1B0GTG2;A0A1B0GW77;P49419;P49419-2	MITOCHONDRIA	Mitochondria	MITOCHONDRIA
A0A1B0GTJ7;A0A1B0GWJ0;P30566	ADSL	A0A1B0GTJ7;A0A1B0GWJ0;P30566	CYTOPLASM	Cytosol	CYTOPLASM
A0A1B0GTJ8;A0A1B0GV63;A0A1B0GVK1;A0A1B0GWJ2;A0A3F2YNW7;A0A6Q8NVI4;H0Y7H8;Q8NFD5;Q8NFD5-2;Q8NFD5-3;Q8NFD5-4	ARID1B	A0A1B0GTJ8;A0A1B0GV63;A0A1B0GVK1;A0A1B0GWJ2;A0A3F2YNW7;A0A6Q8NVI4;H0Y7H8;Q8NFD5;Q8NFD5-2;Q8NFD5-3;Q8NFD5-4		Nucleus	NUCLEUS
A0A1B0GTK8;Q5GJ75	TNFAIP8L3	A0A1B0GTK8;Q5GJ75			PROTEIN-COMPLEX
A0A1B0GTL5	RAB11FIP5	A0A1B0GTL5	ENDOSOME-VESICLE	ER	LD
A0A1B0GTM3;A0A1B0GUA4;A0A1B0GW68;Q13510;Q13510-2	ASAH1	A0A1B0GTM3;A0A1B0GUA4;A0A1B0GW68;Q13510;Q13510-2	LYSOSOME	Lysosome	LYSOSOME
A0A1B0GTU3;Q96L93;Q96L93-4	KIF16B	A0A1B0GTU3;Q96L93;Q96L93-4		Golgi	ENDOSOME-VESICLE
A0A1B0GTU4	PXN	A0A1B0GTU4		Cytosol	CYTOPLASM
A0A1B0GTU5;H0Y488;O14497;O14497-3	ARID1A	A0A1B0GTU5;H0Y488;O14497;O14497-3		Nucleus	PROTEIN-COMPLEX
A0A1B0GTW1;A0A2R8YDH4;A0A3B3IRI3;A0A3B3ITE1;Q9UDY2;Q9UDY2-3;Q9UDY2-7	TJP2;ENSG00000285130;TJP2;TJP2;TJP2;TJP2;TJP2	A0A1B0GTW1;A0A2R8YDH4;A0A3B3IRI3;A0A3B3ITE1;Q9UDY2;Q9UDY2-3;Q9UDY2-7		Cytosol	CYTOPLASM
A0A1B0GTW6	EPB41L1	A0A1B0GTW6	PM	PM	PM
A0A1B0GU24;Q9HCJ0;Q9HCJ0-2	TNRC6C	A0A1B0GU24;Q9HCJ0;Q9HCJ0-2			TRANSLATION
A0A1B0GU48;A0A1B0GV09;Q9H9B1;Q9H9B1-3;Q9H9B1-4	EHMT1	A0A1B0GU48;A0A1B0GV09;Q9H9B1;Q9H9B1-3;Q9H9B1-4	NUCLEUS		NUCLEUS
A0A1B0GU97;A0A1B0GW37	NFIB	A0A1B0GU97;A0A1B0GW37	NUCLEUS		TRANSLATION
A0A1B0GUA3;Q96EK5	KIFBP	A0A1B0GUA3;Q96EK5		Cytosol	CYTOPLASM
A0A1B0GUG6;Q86WH2	RASSF3	A0A1B0GUG6;Q86WH2		Translation	TRANSLATION
A0A1B0GUI1	RALGAPA1	A0A1B0GUI1		Cytosol	TRANSLATION
A0A1B0GUL6;E9PEZ5;Q9UPP5;Q9UPP5-2	BTBD8;BTBD8;KIAA1107;KIAA1107	A0A1B0GUL6;E9PEZ5;Q9UPP5;Q9UPP5-2			ER
A0A1B0GUS7;B1AM27;O14795;O14795-2	UNC13B	A0A1B0GUS7;B1AM27;O14795;O14795-2		Golgi	CYTOPLASM
A0A1B0GUZ7;Q14156;Q14156-2	EFR3A	A0A1B0GUZ7;Q14156;Q14156-2	PM	PM	PROTEIN-COMPLEX
A0A1B0GV02;A0A1B0GVV8;A0A1B0GW50;A0JP08;E7EUW9;O60315;O60315-2;U3KQ51	ZEB2	A0A1B0GV02;A0A1B0GVV8;A0A1B0GW50;A0JP08;E7EUW9;O60315;O60315-2;U3KQ51		Nucleus	NUCLEUS
A0A1B0GV47;Q7Z4S6;Q7Z4S6-2;Q7Z4S6-3;Q7Z4S6-4;Q7Z4S6-5;Q7Z4S6-6	KIF21A	A0A1B0GV47;Q7Z4S6;Q7Z4S6-2;Q7Z4S6-3;Q7Z4S6-4;Q7Z4S6-5;Q7Z4S6-6	CYTOPLASM	Cytosol	PROTEIN-COMPLEX
A0A1B0GV71;A0A1B0GW34;A0A1B0GWD3;H3BR00;Q13286;Q13286-2;Q13286-3;Q13286-4;Q13286-5;Q13286-7;Q9UBD8	CLN3;CLN3;ENSG00000261832;CLN3;CLN3;CLN3;CLN3;CLN3;CLN3;CLN3;CLN3	A0A1B0GV71;A0A1B0GW34;A0A1B0GWD3;H3BR00;Q13286;Q13286-2;Q13286-3;Q13286-4;Q13286-5;Q13286-7;Q9UBD8	LYSOSOME	Mitochondria	ER
A0A1B0GVA6;Q70EK9	USP51	A0A1B0GVA6;Q70EK9			TRANSLATION
A0A1B0GVD5;A0A1B0GVP3;P07339	CTSD	A0A1B0GVD5;A0A1B0GVP3;P07339	LYSOSOME	Lysosome	LYSOSOME
A0A1B0GVI7;A0A2R8Y7G1;P35869	ENSG00000283321;AHR;AHR	A0A1B0GVI7;A0A2R8Y7G1;P35869			PROTEIN-COMPLEX
A0A1B0GVL4	FAM193A	A0A1B0GVL4		Translation	LYSOSOME
A0A1B0GW05	DPY19L1	A0A1B0GW05	ER	ER	ER
A0A1B0GW23	ABHD14A-ACY1	A0A1B0GW23		Cytosol	CYTOPLASM
A0A1B0GWI2;O75503	CLN5	A0A1B0GWI2;O75503		Lysosome	LYSOSOME
A0A1C7CYX9	DPYSL2	A0A1C7CYX9	CYTOPLASM		CYTOPLASM
A0A1D5RMN4;P23945;P23945-2;P23945-3;P23945-4	FSHR	A0A1D5RMN4;P23945;P23945-2;P23945-3;P23945-4		Nucleus	NUCLEUS
A0A1P0AYU5;Q9BWM7	SFXN3	A0A1P0AYU5;Q9BWM7	MITOCHONDRIA	Mitochondria	MITOCHONDRIA
A0A1P0B7D2;A0A286YEN5;A0A286YEQ0;A0A286YEQ7;A0A286YES0;A0A286YES9;A0A286YEV3;A0A286YEW9;A0A286YEX7;A0A286YEY0;A0A286YF02;A0A286YF19;A0A286YF35;A0A286YF62;A0A286YF83;A0A286YF85;A0A286YF97;A0A286YFA6;A0A286YFB6;A0A286YFC0;A0A286YFD7;A0A286YFE2;A0A286YFI3;A0A286YFJ4;A0A286YFJ6;A0A286YFM6;A0A286YFN2;D6RJF9;F8W9R5;P53779;P53779-2;P53779-3	MAPK10	A0A1P0B7D2;A0A286YEN5;A0A286YEQ0;A0A286YEQ7;A0A286YES0;A0A286YES9;A0A286YEV3;A0A286YEW9;A0A286YEX7;A0A286YEY0;A0A286YF02;A0A286YF19;A0A286YF35;A0A286YF62;A0A286YF83;A0A286YF85;A0A286YF97;A0A286YFA6;A0A286YFB6;A0A286YFC0;A0A286YFD7;A0A286YFE2;A0A286YFI3;A0A286YFJ4;A0A286YFJ6;A0A286YFM6;A0A286YFN2;D6RJF9;F8W9R5;P53779;P53779-2;P53779-3		Cytosol	ENDOSOME-VESICLE
A0A1W2PNH8;A0A1W2PNR0;A0A1W2PNW5;A0A1W2PPB6;A0A1W2PPR7;A0A1W2PQA9;A0A1W2PQP4;A0A1W2PQZ1;A0A1W2PS19;K7ELE1;K7EPJ2;O95427	PIGN	A0A1W2PNH8;A0A1W2PNR0;A0A1W2PNW5;A0A1W2PPB6;A0A1W2PPR7;A0A1W2PQA9;A0A1W2PQP4;A0A1W2PQZ1;A0A1W2PS19;K7ELE1;K7EPJ2;O95427		ER	ER
A0A1W2PNR9;Q9Y5U9	IER3IP1	A0A1W2PNR9;Q9Y5U9			LD
A0A1W2PNV1;A0A1W2PNV7;A0A1W2PP78;A0A1W2PPG2;A0A1W2PPI1;A0A1W2PPJ9;A0A1W2PPM8;A0A1W2PQ00;A0A1W2PQE8;A0A1W2PQF1;A0A1W2PR00;A0A1W2PS04;J3QS66;Q7RTN6;Q7RTN6-2;Q7RTN6-3;Q7RTN6-4;Q7RTN6-5;Q7RTN6-6;Q86YC8	STRADA	A0A1W2PNV1;A0A1W2PNV7;A0A1W2PP78;A0A1W2PPG2;A0A1W2PPI1;A0A1W2PPJ9;A0A1W2PPM8;A0A1W2PQ00;A0A1W2PQE8;A0A1W2PQF1;A0A1W2PR00;A0A1W2PS04;J3QS66;Q7RTN6;Q7RTN6-2;Q7RTN6-3;Q7RTN6-4;Q7RTN6-5;Q7RTN6-6;Q86YC8			CYTOPLASM
A0A1W2PNV4	ENSG00000284292	A0A1W2PNV4		Cytosol	PROTEIN-COMPLEX
A0A1W2PNW1;A0A494C0T4;H0YJH6;P42226;P42226-3	STAT6	A0A1W2PNW1;A0A494C0T4;H0YJH6;P42226;P42226-3	CYTOPLASM	Cytosol	CYTOPLASM
A0A1W2PNW4;P17948;P17948-2;P17948-3	FLT1	A0A1W2PNW4;P17948;P17948-2;P17948-3			PROTEIN-COMPLEX
A0A1W2PNX8;Q9H3U1;Q9H3U1-2	UNC45A	A0A1W2PNX8;Q9H3U1;Q9H3U1-2		Cytosol	CYTOPLASM
A0A1W2PP04;Q5JY83;Q9Y388	RBMX2	A0A1W2PP04;Q5JY83;Q9Y388			NUCLEUS
A0A1W2PP11;A0A1W2PS40;C9JNP8;F8WCQ4;Q9H300;Q9H300-2	PARL	A0A1W2PP11;A0A1W2PS40;C9JNP8;F8WCQ4;Q9H300;Q9H300-2	MITOCHONDRIA	Mitochondria	MITOCHONDRIA
A0A1W2PPC6;Q9H3H5;Q9H3H5-2;Q9H3H5-3	DPAGT1	A0A1W2PPC6;Q9H3H5;Q9H3H5-2;Q9H3H5-3	ER	ER	ER
A0A1W2PPG1;A0A1W2PPG5;A0A1W2PPP5;A0A1W2PQM3;A0A1W2PS81;E7EQ34;I3NI02;O14653;O14653-2	GOSR2;GOSR2;GOSR2;GOSR2;GOSR2;ENSG00000262633;GOSR2;GOSR2;GOSR2	A0A1W2PPG1;A0A1W2PPG5;A0A1W2PPP5;A0A1W2PQM3;A0A1W2PS81;E7EQ34;I3NI02;O14653;O14653-2	GOLGI APPARATUS	Endosome	ER
A0A1W2PPJ5;J3QT87;Q96SW2;Q96SW2-2	CRBN	A0A1W2PPJ5;J3QT87;Q96SW2;Q96SW2-2		Cytosol	CYTOPLASM
A0A1W2PPM2;O43766;O43766-2	LIAS	A0A1W2PPM2;O43766;O43766-2	MITOCHONDRIA	Nucleus	MITOCHONDRIA
A0A1W2PPZ5;P23193	TCEA1	A0A1W2PPZ5;P23193		Cytosol	CYTOPLASM
A0A1W2PQ13;A0A1W2PSA9	ENSG00000283761	A0A1W2PQ13;A0A1W2PSA9		ER	GOLGI APPARATUS
A0A1W2PQ75;O15488-4	GYG2	A0A1W2PQ75;O15488-4		Protein Complex	CYTOPLASM
A0A1W2PQP6;Q9BWL3;Q9BWL3-2;Q9BWL3-3;X6R6F3	C1orf43	A0A1W2PQP6;Q9BWL3;Q9BWL3-2;Q9BWL3-3;X6R6F3		PM	ER
A0A1W2PR09;A0A1W2PRL5;A0A1W2PRM0;F5GYH1;Q8NC96	NECAP1	A0A1W2PR09;A0A1W2PRL5;A0A1W2PRM0;F5GYH1;Q8NC96		Cytosol	PROTEIN-COMPLEX
A0A1W2PR17;F2Z2I2;Q16875;Q16875-2;Q16875-3;Q16875-4;Q5VX20;Q5W015	PFKFB3	A0A1W2PR17;F2Z2I2;Q16875;Q16875-2;Q16875-3;Q16875-4;Q5VX20;Q5W015			CYTOPLASM
A0A1W2PR46;A0A1X7SBR3;P14136;P14136-2;P14136-3	GFAP	A0A1W2PR46;A0A1X7SBR3;P14136;P14136-2;P14136-3		Protein Complex	ENDOSOME-VESICLE
A0A1W2PRQ8;Q14129	ENSG00000283809;DGCR6	A0A1W2PRQ8;Q14129			CYTOPLASM
A0A1W2PRV5;E7EQZ4;Q16637;Q16637-3	SMN2;SMN1;SMN2;SMN1	A0A1W2PRV5;E7EQZ4;Q16637;Q16637-3	TRANSLATION		TRANSLATION
A0A1W2PS05;Q8NEB9	PIK3C3	A0A1W2PS05;Q8NEB9	PROTEIN-COMPLEX	Protein Complex	PROTEIN-COMPLEX
A0A1W2PS24;P04439;P04439-2;Q5SRN5;Q5SRN7	HLA-A	A0A1W2PS24;P04439;P04439-2;Q5SRN5;Q5SRN7	PM	PM	ER
A0A1W2PS43;Q14108	SCARB2	A0A1W2PS43;Q14108		PM	LYSOSOME
A0A1W2PS85;A0A494C0S2;P28715;R4GMW8	BIVM-ERCC5;ERCC5;ERCC5;BIVM-ERCC5	A0A1W2PS85;A0A494C0S2;P28715;R4GMW8		Nucleus	NUCLEUS
A0A1X7SBR1;Q7Z3G6	PRICKLE2	A0A1X7SBR1;Q7Z3G6		Protein Complex	LD
A0A1X7SBS0;Q96EB1	ELP4	A0A1X7SBS0;Q96EB1		Protein Complex	PROTEIN-COMPLEX
A0A1X7SBT7;O95502	NPTXR	A0A1X7SBT7;O95502			ER
A0A1X7SBY3;H0Y860;H7C5A5;H7C5C6;H7C5K2;Q9P246;Q9P246-2;Q9P246-3	STIM2	A0A1X7SBY3;H0Y860;H7C5A5;H7C5C6;H7C5K2;Q9P246;Q9P246-2;Q9P246-3			LD
A0A1X7SBZ2;A0A5H1ZRQ2;Q92841	DDX17	A0A1X7SBZ2;A0A5H1ZRQ2;Q92841	NUCLEUS	Nucleus	TRANSLATION
A0A286YEQ6;A0A286YFD1;A0A286YFJ1;A0AVI2	FER1L5	A0A286YEQ6;A0A286YFD1;A0A286YFJ1;A0AVI2			ENDOSOME-VESICLE
A0A286YET3;Q6ZNW5	ENSG00000284626;GDPGP1	A0A286YET3;Q6ZNW5		Cytosol	CYTOPLASM
A0A286YEX4;P08651;P08651-5;P08651-6	NFIC	A0A286YEX4;P08651;P08651-5;P08651-6	NUCLEUS	Nucleus	TRANSLATION
A0A286YF00	MFSD8	A0A286YF00			LD
A0A286YF17;A0A286YFD0;F8W9T8;P42898;P42898-2;Q5SNW7	MTHFR	A0A286YF17;A0A286YFD0;F8W9T8;P42898;P42898-2;Q5SNW7		Cytosol	PROTEIN-COMPLEX
A0A286YF22;O43175	PHGDH	A0A286YF22;O43175	CYTOPLASM	Cytosol	CYTOPLASM
A0A286YFF7;A0A2C9F2P4;P50897	PPT1	A0A286YFF7;A0A2C9F2P4;P50897	LYSOSOME	Lysosome	LYSOSOME
A0A286YFL8	PPT1	A0A286YFL8	LYSOSOME	Lysosome	LYSOSOME
A0A2Q2SV78;E9PFT7;P25054;P25054-3	APC	A0A2Q2SV78;E9PFT7;P25054;P25054-3			LD
A0A2Q3DP09;H7BZY2;Q7Z3E5;Q7Z3E5-2	ARMC9	A0A2Q3DP09;H7BZY2;Q7Z3E5;Q7Z3E5-2			LD
A0A2R2Y2Q3	TPM3	A0A2R2Y2Q3			CYTOPLASM
A0A2R8Y3M9	ENSG00000285330	A0A2R8Y3M9		Protein Complex	ER
A0A2R8Y3N3;A0A2R8Y5P7;P49590;P49590-2	HARS2	A0A2R8Y3N3;A0A2R8Y5P7;P49590;P49590-2	MITOCHONDRIA	PM	MITOCHONDRIA
A0A2R8Y430;P48637	GSS	A0A2R8Y430;P48637		Cytosol	CYTOPLASM
A0A2R8Y440;A0A2R8Y4P4;A0A2R8Y7S2;A0A2R8YG32;A0A2R8YGG3;P51532;P51532-2;P51532-3;P51532-4;P51532-5;Q9HBD4	SMARCA4	A0A2R8Y440;A0A2R8Y4P4;A0A2R8Y7S2;A0A2R8YG32;A0A2R8YGG3;P51532;P51532-2;P51532-3;P51532-4;P51532-5;Q9HBD4	NUCLEUS	Nucleus	NUCLEUS
A0A2R8Y455;A0A2R8Y600;A0A2R8Y620;A0A2R8Y7U2;Q86VX2;Q86VX2-2	COMMD7	A0A2R8Y455;A0A2R8Y600;A0A2R8Y620;A0A2R8Y7U2;Q86VX2;Q86VX2-2		Protein Complex	ENDOSOME-VESICLE
A0A2R8Y478;A6NNI4;G8JLH6;P21926	CD9	A0A2R8Y478;A6NNI4;G8JLH6;P21926		PM	TRANSLATION
A0A2R8Y481;A0A2R8Y4I8;A0A2R8Y5N9;A0A2R8Y7K2;A0A2R8YCL5;A0A2R8YFW8;A0A2R8YGN6;A0A2U3TZR0;Q9UBP0;Q9UBP0-2;Q9UBP0-3;Q9UBP0-4	SPAST	A0A2R8Y481;A0A2R8Y4I8;A0A2R8Y5N9;A0A2R8Y7K2;A0A2R8YCL5;A0A2R8YFW8;A0A2R8YGN6;A0A2U3TZR0;Q9UBP0;Q9UBP0-2;Q9UBP0-3;Q9UBP0-4		ER	ENDOSOME-VESICLE
A0A2R8Y4E3;A0A2R8Y4X1;A0A2R8Y504;A0A2R8Y5P8;A0A2R8Y5R7;A0A2R8Y5X5;A0A2R8Y821;A0A2R8YGQ3;B7Z2R4;O43556;O43556-4	SGCE	A0A2R8Y4E3;A0A2R8Y4X1;A0A2R8Y504;A0A2R8Y5P8;A0A2R8Y5R7;A0A2R8Y5X5;A0A2R8Y821;A0A2R8YGQ3;B7Z2R4;O43556;O43556-4	PM	Translation	ER
A0A2R8Y4H2;B1AHR1;Q9UH03;Q9UH03-2	SEPTIN3	A0A2R8Y4H2;B1AHR1;Q9UH03;Q9UH03-2			PROTEIN-COMPLEX
A0A2R8Y4K2;Q9Y2S2;Q9Y2S2-2	CRYL1	A0A2R8Y4K2;Q9Y2S2;Q9Y2S2-2		Cytosol	CYTOPLASM
A0A2R8Y4T1	TNS1	A0A2R8Y4T1		Cytosol	CYTOPLASM
A0A2R8Y4U1;A0A2R8YDF7;O75164	ENSG00000284989;KDM4A;KDM4A	A0A2R8Y4U1;A0A2R8YDF7;O75164		Nucleus	NUCLEUS
A0A2R8Y4U4;A0A2R8Y7R1;A0A2R8YFL3;P15260	IFNGR1	A0A2R8Y4U4;A0A2R8Y7R1;A0A2R8YFL3;P15260		PM	ER
A0A2R8Y4Y7;A0A2R8YFW4;A0A2U3TZH1;Q9UQ90	SPG7	A0A2R8Y4Y7;A0A2R8YFW4;A0A2U3TZH1;Q9UQ90	MITOCHONDRIA	Mitochondria	MITOCHONDRIA
A0A2R8Y4Z0;A0A2R8Y7W5;Q14004;Q14004-2	CDK13	A0A2R8Y4Z0;A0A2R8Y7W5;Q14004;Q14004-2			MITOCHONDRIA
A0A2R8Y4Z8	CCDC9	A0A2R8Y4Z8	CYTOPLASM	Cytosol	CYTOPLASM
A0A2R8Y521;A0A2R8Y5J0;A0A2R8YFK9;A0A2U3TZM0	CHD4	A0A2R8Y521;A0A2R8Y5J0;A0A2R8YFK9;A0A2U3TZM0		Nucleus	TRANSLATION
A0A2R8Y543;A0A2R8Y5A3;A0A2R8Y804;A0A2R8YCH5;P35222	CTNNB1	A0A2R8Y543;A0A2R8Y5A3;A0A2R8Y804;A0A2R8YCH5;P35222	PM	PM	ER
A0A2R8Y566;Q9P260-2	RELCH	A0A2R8Y566;Q9P260-2	CYTOPLASM	Cytosol	CYTOPLASM
A0A2R8Y595;A0A2R8YFL0;P49711;P49711-2	CTCF	A0A2R8Y595;A0A2R8YFL0;P49711;P49711-2		Nucleus	NUCLEUS
A0A2R8Y5A0;A0A2R8YD58;E7EU96;P68400	CSNK2A1	A0A2R8Y5A0;A0A2R8YD58;E7EU96;P68400		Protein Complex	CYTOPLASM
A0A2R8Y5A6;A0A2R8YDM9	ATXN2	A0A2R8Y5A6;A0A2R8YDM9		Cytosol	ER
A0A2R8Y5C4	TNKS1BP1	A0A2R8Y5C4		Cytosol	CYTOPLASM
A0A2R8Y5K9;A0A2R8Y7U0;H0Y770;O75140;O75140-1;O75140-4;O75140-9	DEPDC5	A0A2R8Y5K9;A0A2R8Y7U0;H0Y770;O75140;O75140-1;O75140-4;O75140-9			TRANSLATION
A0A2R8Y5N2;A0A2R8Y5S3;A0A2R8YFV7;Q92574;Q92574-2	TSC1	A0A2R8Y5N2;A0A2R8Y5S3;A0A2R8YFV7;Q92574;Q92574-2	PROTEIN-COMPLEX	Cytosol	PROTEIN-COMPLEX
A0A2R8Y5P9;Q8TF72	SHROOM3	A0A2R8Y5P9;Q8TF72			MITOCHONDRIA
A0A2R8Y5Q8;A0A2R8YHI9;Q15813;Q15813-2	TBCE	A0A2R8Y5Q8;A0A2R8YHI9;Q15813;Q15813-2		Cytosol	CYTOPLASM
A0A2R8Y635;A0A2R8YDN7	ATP13A3	A0A2R8Y635;A0A2R8YDN7			ENDOSOME-VESICLE
A0A2R8Y661	RAPGEF2	A0A2R8Y661	CYTOPLASM		PROTEIN-COMPLEX
A0A2R8Y6I6	DYRK1A	A0A2R8Y6I6	CYTOPLASM	Cytosol	CYTOPLASM
A0A2R8Y6W8;P19447	ERCC3	A0A2R8Y6W8;P19447			NUCLEUS
A0A2R8Y6Y7;A0A2R8YDQ9;Q9P2R7;Q9P2R7-2	SUCLA2	A0A2R8Y6Y7;A0A2R8YDQ9;Q9P2R7;Q9P2R7-2	MITOCHONDRIA	Mitochondria	MITOCHONDRIA
A0A2R8Y768;A0A6Q8PF14;A0A6Q8PG65;A0A6Q8PG93;A0A6Q8PGV4;O75072;O75072-2	FKTN	A0A2R8Y768;A0A6Q8PF14;A0A6Q8PG65;A0A6Q8PG93;A0A6Q8PGV4;O75072;O75072-2		Golgi	GOLGI APPARATUS
A0A2R8Y7H3	ACOT6	A0A2R8Y7H3			MITOCHONDRIA
A0A2R8Y7Q1;E7ETD6;E9PE19;Q12830;Q12830-2;Q12830-4	BPTF	A0A2R8Y7Q1;E7ETD6;E9PE19;Q12830;Q12830-2;Q12830-4			NUCLEUS
A0A2R8Y7R4;B2RUZ4;H3BS66	SMIM1	A0A2R8Y7R4;B2RUZ4;H3BS66		Endosome	ENDOSOME-VESICLE
A0A2R8Y7X5;A0A2R8YDR3;A0A2R8YDZ2;H3BMQ0;P49815;P49815-2;P49815-3;P49815-4;P49815-5;X5D2U8	TSC2	A0A2R8Y7X5;A0A2R8YDR3;A0A2R8YDZ2;H3BMQ0;P49815;P49815-2;P49815-3;P49815-4;P49815-5;X5D2U8	CYTOPLASM	Cytosol	ENDOSOME-VESICLE
A0A2R8Y7Y4;Q8N8A2;Q8N8A2-2;Q8N8A2-4	ANKRD44	A0A2R8Y7Y4;Q8N8A2;Q8N8A2-2;Q8N8A2-4		Cytosol	CYTOPLASM
A0A2R8Y811;P62263	RPS14	A0A2R8Y811;P62263	TRANSLATION	Translation	TRANSLATION
A0A2R8Y849;A0A2R8YD14;E7ETK0;P62847;P62847-2;P62847-3;P62847-4	RPS24	A0A2R8Y849;A0A2R8YD14;E7ETK0;P62847;P62847-2;P62847-3;P62847-4	TRANSLATION	Translation	TRANSLATION
A0A2R8Y852;A0A2R8YDI1;P39880-3	CUX1	A0A2R8Y852;A0A2R8YDI1;P39880-3			GOLGI APPARATUS
A0A2R8Y880;Q7Z6E9;Q7Z6E9-2	RBBP6	A0A2R8Y880;Q7Z6E9;Q7Z6E9-2			PROTEIN-COMPLEX
A0A2R8Y8E0;A0A2U3TZI2;H7C560;P15056	BRAF	A0A2R8Y8E0;A0A2U3TZI2;H7C560;P15056	PROTEIN-COMPLEX	Cytosol	CYTOPLASM
A0A2R8YCJ8;Q5T2H3;Q5T2H4;Q9NVV5;Q9NVV5-1;Q9NVV5-3;Q9NVV5-4	AIG1	A0A2R8YCJ8;Q5T2H3;Q5T2H4;Q9NVV5;Q9NVV5-1;Q9NVV5-3;Q9NVV5-4		Mitochondria	ER
A0A2R8YCL1;Q13322;Q13322-2;Q13322-3;Q13322-4	GRB10	A0A2R8YCL1;Q13322;Q13322-2;Q13322-3;Q13322-4			LD
A0A2R8YCS7;Q9Y3Z3	SAMHD1	A0A2R8YCS7;Q9Y3Z3		Nucleus	NUCLEUS
A0A2R8YCV2;Q8NCS4	ENSG00000284773;TMEM35B	A0A2R8YCV2;Q8NCS4			nan
A0A2R8YD49;Q9H1P3;Q9H1P3-2	OSBPL2	A0A2R8YD49;Q9H1P3;Q9H1P3-2		Cytosol	MITOCHONDRIA
A0A2R8YD71;P49281-2	SLC11A2	A0A2R8YD71;P49281-2	PM		ER
A0A2R8YDB8;H7BXF5;Q9H0E3;Q9H0E3-3	SAP130	A0A2R8YDB8;H7BXF5;Q9H0E3;Q9H0E3-3			PROTEIN-COMPLEX
A0A2R8YDE6;Q9UBN7;Q9UBN7-2	HDAC6	A0A2R8YDE6;Q9UBN7;Q9UBN7-2	TRANSLATION	Cytosol	CYTOPLASM
A0A2R8YDQ0;Q9H267	ENSG00000284946;VPS33B	A0A2R8YDQ0;Q9H267		Cytosol	CYTOPLASM
A0A2R8YDR8;Q9BZD2;Q9BZD2-2	SLC29A3	A0A2R8YDR8;Q9BZD2;Q9BZD2-2			ER
A0A2R8YDT1;P15104	GLUL	A0A2R8YDT1;P15104	CYTOPLASM	Protein Complex	PROTEIN-COMPLEX
A0A2R8YE63;Q12929	EPS8	A0A2R8YE63;Q12929		Cytosol	CYTOPLASM
A0A2R8YE77;A0A2U3TZM1;O14936;O14936-3	CASK	A0A2R8YE77;A0A2U3TZM1;O14936;O14936-3	PM	PM	PM
A0A2R8YEC9;O00462	MANBA	A0A2R8YEC9;O00462	LYSOSOME		LYSOSOME
A0A2R8YEL6;P48506	GCLC	A0A2R8YEL6;P48506		Cytosol	CYTOPLASM
A0A2R8YEM2;P51946	CCNH	A0A2R8YEM2;P51946			CYTOPLASM
A0A2R8YEM9;O15050	TRANK1	A0A2R8YEM9;O15050			TRANSLATION
A0A2R8YES3;B4DGM3;Q969G3;Q969G3-3;Q969G3-4	SMARCE1	A0A2R8YES3;B4DGM3;Q969G3;Q969G3-3;Q969G3-4	NUCLEUS	Nucleus	NUCLEUS
A0A2R8YEU4	TPM4	A0A2R8YEU4			nan
A0A2R8YFH5;Q15437	SEC23B	A0A2R8YFH5;Q15437	PROTEIN-COMPLEX	Cytosol	CYTOPLASM
A0A2R8YFN3;A1Z1Q3;A1Z1Q3-1	MACROD2	A0A2R8YFN3;A1Z1Q3;A1Z1Q3-1		Cytosol	CYTOPLASM
A0A2R8YFX5;H0YHA8;Q8IVL0;Q8IVL0-2;Q8IVL0-3	NAV3	A0A2R8YFX5;H0YHA8;Q8IVL0;Q8IVL0-2;Q8IVL0-3			TRANSLATION
A0A2R8YG42	ARHGEF7	A0A2R8YG42	PROTEIN-COMPLEX	Protein Complex	PROTEIN-COMPLEX
A0A2R8YGH5;H7C1E4;P61966	AP1S1	A0A2R8YGH5;H7C1E4;P61966		Cytosol	ENDOSOME-VESICLE
A0A2R8YHG5;Q9BZV2	SLC19A3	A0A2R8YHG5;Q9BZV2		ER	ENDOSOME-VESICLE
A0A2U3TZH3;Q05639	EEF1A2	A0A2U3TZH3;Q05639	CYTOPLASM	Protein Complex	CYTOPLASM
A0A2U3TZL5;E9PNW4;P13987;P13987-2	CD59;ENSG00000284969;CD59;CD59	A0A2U3TZL5;E9PNW4;P13987;P13987-2	PM	ER	ER
A0A2U3TZL8;H0YME6;H7BYN4;Q02241;Q02241-2	KIF23	A0A2U3TZL8;H0YME6;H7BYN4;Q02241;Q02241-2
A0A2U3TZU2;P06744	GPI	A0A2U3TZU2;P06744	CYTOPLASM	Cytosol	CYTOPLASM
A0A2U3TZV8;Q4KWH8;Q4KWH8-2;Q4KWH8-3;Q4KWH8-4	PLCH1	A0A2U3TZV8;Q4KWH8;Q4KWH8-2;Q4KWH8-3;Q4KWH8-4			GOLGI APPARATUS
A0A2U3U020;P55808-3	XG	A0A2U3U020;P55808-3			GOLGI APPARATUS
A0A2Y9D025;P56556	NDUFA6	A0A2Y9D025;P56556	MITOCHONDRIA	Mitochondria	MITOCHONDRIA
A0A384DVK4;Q7Z5L2;Q7Z5L2-2	R3HCC1L	A0A384DVK4;Q7Z5L2;Q7Z5L2-2		Cytosol	PROTEIN-COMPLEX
A0A384DVU0;Q8IY17;Q8IY17-3	PNPLA6	A0A384DVU0;Q8IY17;Q8IY17-3	ER	ER	ER
A0A384N5Y3;F5H2F4;V9GYY3	MTHFD1	A0A384N5Y3;F5H2F4;V9GYY3			CYTOPLASM
A0A3B3IRI0	OGFRL1	A0A3B3IRI0		Endosome	ER
A0A3B3IRJ9;A0A3B3ITL0;Q9Y2H2	INPP5F	A0A3B3IRJ9;A0A3B3ITL0;Q9Y2H2			LD
A0A3B3IRL2;O75629	CREG1	A0A3B3IRL2;O75629		Lysosome	LYSOSOME
A0A3B3IRM4;O75191	XYLB	A0A3B3IRM4;O75191		Cytosol	PROTEIN-COMPLEX
A0A3B3IRM5;P46439;Q5T8R1	GSTM5	A0A3B3IRM5;P46439;Q5T8R1	CYTOPLASM	Cytosol	CYTOPLASM
A0A3B3IRN8;A0A3B3ITX0;P24311	COX7B	A0A3B3IRN8;A0A3B3ITX0;P24311	MITOCHONDRIA	Mitochondria	MITOCHONDRIA
A0A3B3IRQ9	ADAR	A0A3B3IRQ9	NUCLEUS		NUCLEUS
A0A3B3IRR1;A0A3F2YNY7;P08397;P08397-2	HMBS	A0A3B3IRR1;A0A3F2YNY7;P08397;P08397-2		Cytosol	CYTOPLASM
A0A3B3IRV1	ENSG00000285547	A0A3B3IRV1		Cytosol	CYTOPLASM
A0A3B3IRX2;P14555	PLA2G2A	A0A3B3IRX2;P14555			nan
A0A3B3IS71;P06400	RB1	A0A3B3IS71;P06400	NUCLEUS	Nucleus	NUCLEUS
A0A3B3ISD1;P11362;P11362-14;P11362-2;P11362-20;P11362-21;P11362-3;P11362-4;P11362-5;P11362-6;P11362-7	FGFR1	A0A3B3ISD1;P11362;P11362-14;P11362-2;P11362-20;P11362-21;P11362-3;P11362-4;P11362-5;P11362-6;P11362-7		PM	CYTOPLASM
A0A3B3ISF0;Q659C4;Q659C4-2	LARP1B	A0A3B3ISF0;Q659C4;Q659C4-2			TRANSLATION
A0A3B3ISF6	KLHDC7B	A0A3B3ISF6			ER
A0A3B3ISF9;P42892;P42892-3;P42892-4	ECE1	A0A3B3ISF9;P42892;P42892-3;P42892-4	ENDOSOME-VESICLE	Translation	ENDOSOME-VESICLE
A0A3B3ISG5;P14735	IDE	A0A3B3ISG5;P14735		Cytosol	CYTOPLASM
A0A3B3ISJ2;Q96KQ4	PPP1R13B	A0A3B3ISJ2;Q96KQ4			CYTOPLASM
A0A3B3ISL7;A0A3B3ITY4;A0A3B3ITZ8;A0A3B3IUC5;Q8N8U9	BMPER	A0A3B3ISL7;A0A3B3ITY4;A0A3B3ITZ8;A0A3B3IUC5;Q8N8U9		PM	LD
A0A3B3ISL8;G3V2D1;O75582;O75582-2;O75582-3	RPS6KA5	A0A3B3ISL8;G3V2D1;O75582;O75582-2;O75582-3			CYTOPLASM
A0A3B3ISM6;A0A3B3ITJ2;P10746	UROS	A0A3B3ISM6;A0A3B3ITJ2;P10746		Cytosol	CYTOPLASM
A0A3B3ISP1;Q92625	ANKS1A	A0A3B3ISP1;Q92625		Cytosol	CYTOPLASM
A0A3B3ISQ4;Q9H6S3;Q9H6S3-3	EPS8L2	A0A3B3ISQ4;Q9H6S3;Q9H6S3-3	CYTOPLASM	Cytosol	CYTOPLASM
A0A3B3ISR2;B4DPQ0;P00736	C1R	A0A3B3ISR2;B4DPQ0;P00736			LD
A0A3B3ISS6;Q14956;Q14956-2	GPNMB	A0A3B3ISS6;Q14956;Q14956-2		Endosome	LYSOSOME
A0A3B3IST1;B5MD23;O75954	TSPAN9	A0A3B3IST1;B5MD23;O75954			LD
A0A3B3ISV4	VKORC1L1	A0A3B3ISV4	ER	ER	ER
A0A3B3ISV5;Q8N9N7	ENSG00000285942;LRRC57	A0A3B3ISV5;Q8N9N7	CYTOPLASM	Cytosol	CYTOPLASM
A0A3B3ISX9	TNXB	A0A3B3ISX9			PM
A0A3B3ISZ5;Q9UDY2-6	TJP2	A0A3B3ISZ5;Q9UDY2-6			nan
A0A3B3IT31;Q9NUN5;Q9NUN5-3	LMBRD1	A0A3B3IT31;Q9NUN5;Q9NUN5-3	ENDOSOME-VESICLE	ER	ER
A0A3B3IT47;Q9Y2I8;Q9Y2I8-2	WDR37	A0A3B3IT47;Q9Y2I8;Q9Y2I8-2		Protein Complex	PROTEIN-COMPLEX
A0A3B3IT54;Q9H7E9;Q9H7E9-2	C8orf33	A0A3B3IT54;Q9H7E9;Q9H7E9-2		Translation	TRANSLATION
A0A3B3IT64;P98164	LRP2	A0A3B3IT64;P98164			PEROXISOME
A0A3B3IT92;A0A3B3IU45;P33991	MCM4	A0A3B3IT92;A0A3B3IU45;P33991			NUCLEUS
A0A3B3IT94;A0A5F9ZGS6;Q5JSC9;Q96LT4;Q96LT4-2	SAMD8	A0A3B3IT94;A0A5F9ZGS6;Q5JSC9;Q96LT4;Q96LT4-2			GOLGI APPARATUS
A0A3B3ITD7;A0A3B3ITI2;E5RHC2;Q96HA8;Q96HA8-2	NTAQ1	A0A3B3ITD7;A0A3B3ITI2;E5RHC2;Q96HA8;Q96HA8-2		Cytosol	CYTOPLASM
A0A3B3ITG3;H0Y3A3;Q5VWQ8;Q5VWQ8-2;Q5VWQ8-3;Q5VWQ8-4;Q5VWQ8-5	DAB2IP	A0A3B3ITG3;H0Y3A3;Q5VWQ8;Q5VWQ8-2;Q5VWQ8-3;Q5VWQ8-4;Q5VWQ8-5		PM	LD
A0A3B3ITH3;Q9P2X3	IMPACT	A0A3B3ITH3;Q9P2X3		Cytosol	CYTOPLASM
A0A3B3ITK0;P35442	THBS2	A0A3B3ITK0;P35442			LD
A0A3B3ITK4;Q96LA8;Q96LA8-2	PRMT6	A0A3B3ITK4;Q96LA8;Q96LA8-2		Nucleus	nan
A0A3B3ITL1;Q8WUD1	RAB2B	A0A3B3ITL1;Q8WUD1		ER	ER
A0A3B3ITN6;D6RA89;D6RBB0;O60683;O60683-2	PEX10	A0A3B3ITN6;D6RA89;D6RBB0;O60683;O60683-2		Mitochondria	PEROXISOME
A0A3B3ITN8;Q8NFJ5	GPRC5A	A0A3B3ITN8;Q8NFJ5			PROTEIN-COMPLEX
A0A3B3ITP4;Q495G5;Q8IVH4	MMAA	A0A3B3ITP4;Q495G5;Q8IVH4	MITOCHONDRIA	Mitochondria	MITOCHONDRIA
A0A3B3ITR4	ENSG00000285953	A0A3B3ITR4			ER
A0A3B3ITT1	RAB12	A0A3B3ITT1	LD	Cytosol	LD
A0A3B3ITT5;P47914	RPL29	A0A3B3ITT5;P47914	TRANSLATION	Translation	TRANSLATION
A0A3B3ITU3;Q9H246	C1orf21	A0A3B3ITU3;Q9H246		PM	PM
A0A3B3ITU8;A0A3B3IU04;A0A3F2YNW8;Q14643;Q14643-2;Q14643-3;Q14643-4;Q14643-5;Q14643-6;Q14643-7;Q14643-8	ITPR1	A0A3B3ITU8;A0A3B3IU04;A0A3F2YNW8;Q14643;Q14643-2;Q14643-3;Q14643-4;Q14643-5;Q14643-6;Q14643-7;Q14643-8	ER	Cytosol	ER
A0A3B3ITX9	GET1-SH3BGR	A0A3B3ITX9			nan
A0A3B3IU42;G5EA29;H0YDP6;H0YEL0;O14893;O14893-2;O14893-3	GEMIN2	A0A3B3IU42;G5EA29;H0YDP6;H0YEL0;O14893;O14893-2;O14893-3	TRANSLATION		PROTEIN-COMPLEX
A0A3B3IU69;F8W717;O00423;O00423-3	EML1	A0A3B3IU69;F8W717;O00423;O00423-3		Translation	TRANSLATION
A0A3B3IUA2	SNU13	A0A3B3IUA2		Nucleus	CYTOPLASM
A0A3B3IUB1;Q13144	EIF2B5	A0A3B3IUB1;Q13144	TRANSLATION	Translation	TRANSLATION
A0A3B3IUB5;Q8TCT9;Q8TCT9-5	HM13	A0A3B3IUB5;Q8TCT9;Q8TCT9-5	ER	ER	ER
A0A3B3IUC4;A0A6Q8PFA9;P06280	GLA	A0A3B3IUC4;A0A6Q8PFA9;P06280	LYSOSOME	Lysosome	LYSOSOME
A0A3B3IUD7;Q14690	PDCD11	A0A3B3IUD7;Q14690		Nucleus	CYTOPLASM
A0A494BXY3;E9PLD3;E9PRG8	C11orf98;ENSG00000255432;C11orf98	A0A494BXY3;E9PLD3;E9PRG8		Nucleus	TRANSLATION
A0A494BZV2	MPRIP	A0A494BZV2		Protein Complex	CYTOPLASM
A0A494BZW8;A0A494C0B6;A0A494C0J9;A0A499FJL5;C9J8C7;E7ERD7;Q9UKU0;Q9UKU0-1;Q9UKU0-3;Q9UKU0-5;Q9UKU0-6;Q9UKU0-7;Q9UKU0-8;Q9UKU0-9	ACSL6	A0A494BZW8;A0A494C0B6;A0A494C0J9;A0A499FJL5;C9J8C7;E7ERD7;Q9UKU0;Q9UKU0-1;Q9UKU0-3;Q9UKU0-5;Q9UKU0-6;Q9UKU0-7;Q9UKU0-8;Q9UKU0-9	MITOCHONDRIA		ER
A0A494BZZ2;H0YK48;H0YKJ4;P09493-5	TPM1	A0A494BZZ2;H0YK48;H0YKJ4;P09493-5		Cytosol	CYTOPLASM
A0A494BZZ8;Q96K49;Q96K49-2	TMEM87B	A0A494BZZ8;Q96K49;Q96K49-2			GOLGI APPARATUS
A0A494C004;A0A494C0C5;A0A494C0V5;A0A494C141;A0A499FJ53;A6XNE1;F6Y2X3;Q16635;Q16635-2;Q16635-3;Q16635-4;Q16635-5;Q16635-6;Q16635-7;Q16635-8;Q16635-9	TAZ	A0A494C004;A0A494C0C5;A0A494C0V5;A0A494C141;A0A499FJ53;A6XNE1;F6Y2X3;Q16635;Q16635-2;Q16635-3;Q16635-4;Q16635-5;Q16635-6;Q16635-7;Q16635-8;Q16635-9	MITOCHONDRIA	Mitochondria	MITOCHONDRIA
A0A494C028;H0Y993;P35659	DEK	A0A494C028;H0Y993;P35659	NUCLEUS	Nucleus	NUCLEUS
A0A494C050;Q5M9Q1;Q8N5F7	NKAP;NKAPL;NKAP	A0A494C050;Q5M9Q1;Q8N5F7			NUCLEUS
A0A494C060	ACTN2	A0A494C060			NUCLEUS
A0A494C066;B7Z4W5;Q16773	KYAT1	A0A494C066;B7Z4W5;Q16773	CYTOPLASM	Cytosol	CYTOPLASM
A0A494C068;A0A494C1K7;E9PGP6;Q9UGJ0;Q9UGJ0-2;Q9UGJ0-3	PRKAG2	A0A494C068;A0A494C1K7;E9PGP6;Q9UGJ0;Q9UGJ0-2;Q9UGJ0-3			PROTEIN-COMPLEX
A0A494C070;H0Y6K5;H0Y7L6;Q02447;Q02447-2;Q02447-3;Q02447-4;Q02447-5;Q02447-6	SP3	A0A494C070;H0Y6K5;H0Y7L6;Q02447;Q02447-2;Q02447-3;Q02447-4;Q02447-5;Q02447-6			NUCLEUS
A0A494C0D8;Q75N90	FBN3	A0A494C0D8;Q75N90			PEROXISOME
A0A494C0G1;O95394;O95394-4	PGM3	A0A494C0G1;O95394;O95394-4	CYTOPLASM	Cytosol	CYTOPLASM
A0A494C0M1;P52701	MSH6	A0A494C0M1;P52701		Nucleus	NUCLEUS
A0A494C0N4;Q7Z4L5	TTC21B	A0A494C0N4;Q7Z4L5		Translation	TRANSLATION
A0A494C0P1;P04150;P04150-10;P04150-8	NR3C1	A0A494C0P1;P04150;P04150-10;P04150-8	CYTOPLASM	Cytosol	CYTOPLASM
A0A494C0Q8;P06132	UROD	A0A494C0Q8;P06132	CYTOPLASM	Cytosol	CYTOPLASM
A0A494C0R7;O43734;O43734-2;O43734-3;O43734-4;O43734-5	TRAF3IP2	A0A494C0R7;O43734;O43734-2;O43734-3;O43734-4;O43734-5		Cytosol	CYTOPLASM
A0A494C0R8	CLUH	A0A494C0R8	ENDOSOME-VESICLE	Cytosol	CYTOPLASM
A0A494C0S0;Q9H3E2	SNX25	A0A494C0S0;Q9H3E2			GOLGI APPARATUS
A0A494C0T3;E9PFV2;P37231;P37231-2	PPARG	A0A494C0T3;E9PFV2;P37231;P37231-2		Nucleus	CYTOPLASM
A0A494C0V9;B8ZZ87;H7BZ50;H7C173;H7C202;Q6NZ67;Q6P582	MZT2B;MZT2B;MZT2B;MZT2B;MZT2A;MZT2B;MZT2A	A0A494C0V9;B8ZZ87;H7BZ50;H7C173;H7C202;Q6NZ67;Q6P582		Endosome	nan
A0A494C0Y9	FAM120A	A0A494C0Y9	PM	ER	PM
A0A494C0Z5;Q9H082	RAB33B	A0A494C0Z5;Q9H082	PM	ER	ER
A0A494C105;Q9H3U5;Q9H3U5-3;Q9H3U5-5;Q9H3U5-6	MFSD1	A0A494C105;Q9H3U5;Q9H3U5-3;Q9H3U5-5;Q9H3U5-6	PM	ER	ER
A0A494C108;Q8N9T8	KRI1	A0A494C108;Q8N9T8			NUCLEUS
A0A494C120;Q9HA38;Q9HA38-2	ZMAT3	A0A494C120;Q9HA38;Q9HA38-2		Translation	TRANSLATION
A0A494C143;Q14689;Q14689-6	DIP2A	A0A494C143;Q14689;Q14689-6			CYTOPLASM
A0A494C146;P50336	PPOX	A0A494C146;P50336		Mitochondria	MITOCHONDRIA
A0A494C164;P52630;P52630-4	STAT2	A0A494C164;P52630;P52630-4	CYTOPLASM	Cytosol	CYTOPLASM
A0A494C165;P12955	PEPD	A0A494C165;P12955		Cytosol	CYTOPLASM
A0A494C167;Q9UHD2	TBK1	A0A494C167;Q9UHD2	PROTEIN-COMPLEX	Protein Complex	CYTOPLASM
A0A494C1F2;P35658;P35658-2;P35658-3;P35658-4;P35658-5	NUP214	A0A494C1F2;P35658;P35658-2;P35658-3;P35658-4;P35658-5		Nucleus	NUCLEUS
A0A494C1J1;Q69YQ0;Q69YQ0-2	SPECC1L	A0A494C1J1;Q69YQ0;Q69YQ0-2		Protein Complex	CYTOPLASM
A0A494C1K3;P78347;P78347-2;P78347-3;P78347-4	GTF2I	A0A494C1K3;P78347;P78347-2;P78347-3;P78347-4	NUCLEUS	Nucleus	NUCLEUS
A0A494C1L5	LRBA	A0A494C1L5	GOLGI APPARATUS	Cytosol	CYTOPLASM
A0A494C1M4;Q3SY69	ALDH1L2	A0A494C1M4;Q3SY69		Mitochondria	CYTOPLASM
A0A494C1N0;P26885	FKBP2	A0A494C1N0;P26885	ER	ER	ER
A0A494C1V1;H0Y764;Q6ZNJ1;Q6ZNJ1-2;Q6ZNJ1-3	NBEAL2	A0A494C1V1;H0Y764;Q6ZNJ1;Q6ZNJ1-2;Q6ZNJ1-3		Cytosol	LD
A0A499FI31;Q15020	SART3	A0A499FI31;Q15020	NUCLEUS	Nucleus	NUCLEUS
A0A499FIS5;A0A499FJN1;A0A499FJS1;Q9BUB5;Q9BUB5-2;Q9BUB5-3	MKNK1	A0A499FIS5;A0A499FJN1;A0A499FJS1;Q9BUB5;Q9BUB5-2;Q9BUB5-3		Cytosol	MITOCHONDRIA
A0A499FIX8;A0FGR8-2;H7BXI1	ESYT2	A0A499FIX8;A0FGR8-2;H7BXI1		ER	ER
A0A499FIZ0	WDR26	A0A499FIZ0		Protein Complex	PROTEIN-COMPLEX
A0A499FJ16;A0A5F9ZGX5;A0A5F9ZHB0;A0A5F9ZHJ2;A0A5F9ZHL4;A0A5F9ZHP4;A0A5F9ZHQ1;A0A5F9ZI29;C9J1X3;Q07912;Q07912-2;Q07912-3	TNK2	A0A499FJ16;A0A5F9ZGX5;A0A5F9ZHB0;A0A5F9ZHJ2;A0A5F9ZHL4;A0A5F9ZHP4;A0A5F9ZHQ1;A0A5F9ZI29;C9J1X3;Q07912;Q07912-2;Q07912-3			GOLGI APPARATUS
A0A499FJI4;O75592;O75592-2	MYCBP2	A0A499FJI4;O75592;O75592-2	TRANSLATION	PM	TRANSLATION
A0A499FJK2;P01137	TGFB1	A0A499FJK2;P01137			NUCLEUS
A0A4W8VYG7;A0A4W8W4R1;Q99674	CGREF1	A0A4W8VYG7;A0A4W8W4R1;Q99674		Endosome	GOLGI APPARATUS
A0A590UJ43;P48729;P48729-3;U3KPX3	CSNK1A1	A0A590UJ43;P48729;P48729-3;U3KPX3		Protein Complex	PROTEIN-COMPLEX
A0A590UJ57;A0A590UJ98;A0A590UJF9;A0A590UJH5;A0A590UJJ8;A0A590UJT0;A0A590UK53;A0A590UK84;A0A590UK97;A0A590UKB1;E9PP15;Q14114;Q14114-2;Q14114-3;Q14114-4	LRP8	A0A590UJ57;A0A590UJ98;A0A590UJF9;A0A590UJH5;A0A590UJJ8;A0A590UJT0;A0A590UK53;A0A590UK84;A0A590UK97;A0A590UKB1;E9PP15;Q14114;Q14114-2;Q14114-3;Q14114-4			PROTEIN-COMPLEX
A0A590UJ74;Q9UPY6;Q9UPY6-2	WASF3	A0A590UJ74;Q9UPY6;Q9UPY6-2			PROTEIN-COMPLEX
A0A590UJA9;C9JCW7;C9JE12;Q9BVT8	TMUB1	A0A590UJA9;C9JCW7;C9JE12;Q9BVT8	ER	ER	ER
A0A590UJB6;A0A590UJJ4;A0A5F9UN28;Q13303;Q13303-2;Q13303-3;Q13303-4;Q13303-5	KCNAB2	A0A590UJB6;A0A590UJJ4;A0A5F9UN28;Q13303;Q13303-2;Q13303-3;Q13303-4;Q13303-5		Translation	ER
A0A590UJF0	GNAS	A0A590UJF0	PM	PM	ER
A0A590UJG2;Q9UPN3-2;Q9UPN3-3	MACF1	A0A590UJG2;Q9UPN3-2;Q9UPN3-3		Protein Complex	PROTEIN-COMPLEX
A0A590UJI0;H0YDE5;Q6ZVL6	KIAA1549L	A0A590UJI0;H0YDE5;Q6ZVL6			PROTEIN-COMPLEX
A0A590UJK3;Q14BN4;Q14BN4-2;Q14BN4-3	SLMAP	A0A590UJK3;Q14BN4;Q14BN4-2;Q14BN4-3	ER	ER	GOLGI APPARATUS
A0A590UJK4;A0A590UJP7;A0A590UK01;A0A590UK80;Q13247;Q13247-3	SRSF6;SRSF6;SRSF6;ENSG00000288000;SRSF6;SRSF6	A0A590UJK4;A0A590UJP7;A0A590UK01;A0A590UK80;Q13247;Q13247-3		Cytosol	TRANSLATION
A0A590UJL0;P08842	STS	A0A590UJL0;P08842		PM	ER
A0A590UJR3;Q13616	CUL1	A0A590UJR3;Q13616	PROTEIN-COMPLEX	Protein Complex	CYTOPLASM
A0A590UJS4;Q6KC79;Q6KC79-2	NIPBL	A0A590UJS4;Q6KC79;Q6KC79-2	NUCLEUS		NUCLEUS
A0A590UJS8;A0A5F9ZA98;O75027;O75027-2	ABCB7	A0A590UJS8;A0A5F9ZA98;O75027;O75027-2	MITOCHONDRIA	Mitochondria	MITOCHONDRIA
A0A590UJW0;P20585	MSH3	A0A590UJW0;P20585			TRANSLATION
A0A590UJW4;E7EQB3;Q9BSV6	TSEN34	A0A590UJW4;E7EQB3;Q9BSV6		Cytosol	CYTOPLASM
A0A590UJW6;A0A5F9XIK1;H3BS18;Q8WYQ9;Q8WYQ9-2	ZCCHC14	A0A590UJW6;A0A5F9XIK1;H3BS18;Q8WYQ9;Q8WYQ9-2			NUCLEUS
A0A5E8;Q99501	GAS2L1	A0A5E8;Q99501			LD
A0A5F9UJV3;Q13367;Q13367-4	AP3B2	A0A5F9UJV3;Q13367;Q13367-4		Protein Complex	PROTEIN-COMPLEX
A0A5F9UK94;H0Y360;Q01433	AMPD2	A0A5F9UK94;H0Y360;Q01433	PROTEIN-COMPLEX	Protein Complex	PROTEIN-COMPLEX
A0A5F9UP49;Q9BRK5	SDF4	A0A5F9UP49;Q9BRK5	GOLGI APPARATUS	Golgi	GOLGI APPARATUS
A0A5F9UY30;A0A5H1ZRP2;O43493;O43493-3;O43493-5;O43493-7	TGOLN2	A0A5F9UY30;A0A5H1ZRP2;O43493;O43493-3;O43493-5;O43493-7		Translation	GOLGI APPARATUS
A0A5F9VB99	SLMAP	A0A5F9VB99	ER		ER
A0A5F9YFS9	SPCS1	A0A5F9YFS9	ER	ER	ER
A0A5F9ZGN6;P05089;P05089-2	ARG1	A0A5F9ZGN6;P05089;P05089-2		Cytosol	LD
A0A5F9ZGS5;A0A5F9ZGZ5;A0A5F9ZH30;A0A5F9ZH70;A0A5F9ZHC9;A0A5F9ZHE4;A0A5F9ZHG3;A0A5F9ZI18	ANK2	A0A5F9ZGS5;A0A5F9ZGZ5;A0A5F9ZH30;A0A5F9ZH70;A0A5F9ZHC9;A0A5F9ZHE4;A0A5F9ZHG3;A0A5F9ZI18		Cytosol	CYTOPLASM
A0A5F9ZGY7	UFSP1	A0A5F9ZGY7			CYTOPLASM
A0A5F9ZH13;E9PR06;E9PRT0;E9PSB9;Q9NQC8;Q9NQC8-2	IFT46	A0A5F9ZH13;E9PR06;E9PRT0;E9PSB9;Q9NQC8;Q9NQC8-2		Cytosol	PROTEIN-COMPLEX
A0A5F9ZH14;Q3SYG4;Q3SYG4-2;Q3SYG4-3;Q3SYG4-4;Q3SYG4-7	BBS9	A0A5F9ZH14;Q3SYG4;Q3SYG4-2;Q3SYG4-3;Q3SYG4-4;Q3SYG4-7			TRANSLATION
A0A5F9ZH93;A0A5F9ZHX9;Q9UHN1	POLG2	A0A5F9ZH93;A0A5F9ZHX9;Q9UHN1	MITOCHONDRIA	Mitochondria	MITOCHONDRIA
A0A5F9ZHD5;B4DZ60;F6R5I9;P17707	AMD1	A0A5F9ZHD5;B4DZ60;F6R5I9;P17707			NUCLEUS
A0A5F9ZHG7;E9PCH4;Q8TEU7;Q8TEU7-4	RAPGEF6;ENSG00000273217;RAPGEF6;RAPGEF6	A0A5F9ZHG7;E9PCH4;Q8TEU7;Q8TEU7-4			PROTEIN-COMPLEX
A0A5F9ZHJ0	ACAT1	A0A5F9ZHJ0	MITOCHONDRIA	Mitochondria	MITOCHONDRIA
A0A5F9ZHM4;P07195	LDHB	A0A5F9ZHM4;P07195	CYTOPLASM	Cytosol	CYTOPLASM
A0A5F9ZHN7;Q9NTJ5	SACM1L	A0A5F9ZHN7;Q9NTJ5	ER	ER	ER
A0A5F9ZHN9;P51648;P51648-2	ALDH3A2	A0A5F9ZHN9;P51648;P51648-2	ER	ER	ER
A0A5F9ZHP1;Q8N9N2-2	ASCC1	A0A5F9ZHP1;Q8N9N2-2	TRANSLATION	Protein Complex	TRANSLATION
A0A5F9ZHQ6;A0A6I8PIP2;O75071	EFCAB14	A0A5F9ZHQ6;A0A6I8PIP2;O75071			GOLGI APPARATUS
A0A5F9ZHU3;A0A5K1VW74;Q9Y243;Q9Y243-2	AKT3	A0A5F9ZHU3;A0A5K1VW74;Q9Y243;Q9Y243-2			PROTEIN-COMPLEX
A0A5F9ZHU6;A0A6Q8PGB1;A0A6Q8PGP6;A0A6Q8PH24;A0A6Q8PH78;O15078	CEP290	A0A5F9ZHU6;A0A6Q8PGB1;A0A6Q8PGP6;A0A6Q8PH24;A0A6Q8PH78;O15078			PROTEIN-COMPLEX
A0A5F9ZHU7;P49643	PRIM2	A0A5F9ZHU7;P49643			NUCLEUS
A0A5F9ZHW1;A0A5F9ZHX2;A0A5F9ZI43;A6NH01;H7BZG6;P56377	AP1S2	A0A5F9ZHW1;A0A5F9ZHX2;A0A5F9ZI43;A6NH01;H7BZG6;P56377	PROTEIN-COMPLEX		PROTEIN-COMPLEX
A0A5F9ZHY7;Q8WY22	BRI3BP	A0A5F9ZHY7;Q8WY22			GOLGI APPARATUS
A0A5F9ZHZ7;A0A669KAW7;A0A669KAW9;A0A669KAY3;A0A669KAZ0;A0A669KBI0;C9J818;C9JX57;D3DSE6;P57076;Q9NX33	CFAP298-TCP10L;CFAP298-TCP10L;CFAP298-TCP10L;CFAP298-TCP10L;CFAP298-TCP10L;CFAP298-TCP10L;CFAP298;CFAP298;CFAP298;CFAP298;CFAP298	A0A5F9ZHZ7;A0A669KAW7;A0A669KAW9;A0A669KAY3;A0A669KAZ0;A0A669KBI0;C9J818;C9JX57;D3DSE6;P57076;Q9NX33		Protein Complex	CYTOPLASM
A0A5F9ZI21;Q92974;Q92974-2;Q92974-3;V9GYM8	ARHGEF2	A0A5F9ZI21;Q92974;Q92974-2;Q92974-3;V9GYM8		Translation	TRANSLATION
A0A5H1ZRP4;Q8WX92;Q8WX92-2	NELFB	A0A5H1ZRP4;Q8WX92;Q8WX92-2		Nucleus	ENDOSOME-VESICLE
A0A5H1ZRS1	PCM1	A0A5H1ZRS1		Golgi	TRANSLATION
A0A5K1VW60;Q99766	DMAC2L	A0A5K1VW60;Q99766	MITOCHONDRIA	Mitochondria	MITOCHONDRIA
A0A5K1VW61;A0A5K1VW71;A0A5K1VW79;A0A5K1VW93;Q7Z5Q1;Q7Z5Q1-3;Q7Z5Q1-4;Q7Z5Q1-5;Q7Z5Q1-6;Q7Z5Q1-7;Q7Z5Q1-8;Q7Z5Q1-9	CPEB2	A0A5K1VW61;A0A5K1VW71;A0A5K1VW79;A0A5K1VW93;Q7Z5Q1;Q7Z5Q1-3;Q7Z5Q1-4;Q7Z5Q1-5;Q7Z5Q1-6;Q7Z5Q1-7;Q7Z5Q1-8;Q7Z5Q1-9		Cytosol	PROTEIN-COMPLEX
A0A5K1VW70;P98198;P98198-3	ATP8B2	A0A5K1VW70;P98198;P98198-3			PROTEIN-COMPLEX
A0A5K1VW95;P40925;P40925-3	MDH1	A0A5K1VW95;P40925;P40925-3	CYTOPLASM	Cytosol	CYTOPLASM
A0A669KA35;B1AMG5;Q5JSG7;Q92824;Q92824-2	PCSK5	A0A669KA35;B1AMG5;Q5JSG7;Q92824;Q92824-2			NUCLEUS
A0A669KA36;A0A669KB88;B7ZLR4;E7ET55;F5H562;F5H748;P35670;P35670-2;P35670-4	ATP7B	A0A669KA36;A0A669KB88;B7ZLR4;E7ET55;F5H562;F5H748;P35670;P35670-2;P35670-4	GOLGI APPARATUS		ENDOSOME-VESICLE
A0A669KAV7;A0A669KBG4;A0A669KBH9;B9EGQ5;M0QXA7;O95785-3;O95785-4	WIZ	A0A669KAV7;A0A669KBG4;A0A669KBH9;B9EGQ5;M0QXA7;O95785-3;O95785-4		Protein Complex	GOLGI APPARATUS
A0A669KAW3;H0Y818;P40692	MLH1	A0A669KAW3;H0Y818;P40692	NUCLEUS	Cytosol	NUCLEUS
A0A669KAX3;O76024	WFS1	A0A669KAX3;O76024	ER	ER	ER
A0A669KAX4;K4DI93;Q13620;Q13620-1	CUL4B	A0A669KAX4;K4DI93;Q13620;Q13620-1		Cytosol	CYTOPLASM
A0A669KAX9;Q5T653	ENSG00000288564;MRPL2	A0A669KAX9;Q5T653	MITOCHONDRIA	Mitochondria	MITOCHONDRIA
A0A669KAY5;A0A669KB27;A0A669KBH7	DUS4L-BCAP29	A0A669KAY5;A0A669KB27;A0A669KBH7		ER	ER
A0A669KB05	CTNND1	A0A669KB05	PM		NUCLEUS
A0A669KB10;A0A669KBG8;Q92538;Q92538-2;Q92538-3	GBF1	A0A669KB10;A0A669KBG8;Q92538;Q92538-2;Q92538-3		Protein Complex	ENDOSOME-VESICLE
A0A669KB12;Q09472	EP300	A0A669KB12;Q09472		Nucleus	NUCLEUS
A0A669KB29;Q9P0U4;Q9P0U4-2	CXXC1	A0A669KB29;Q9P0U4;Q9P0U4-2		Nucleus	NUCLEUS
A0A669KB53;A0A669KB56;A0A669KB68;A0A669KBA4;A0A669KBI6;J3KPM9;P42224;P42224-2	STAT1	A0A669KB53;A0A669KB56;A0A669KB68;A0A669KBA4;A0A669KBI6;J3KPM9;P42224;P42224-2		Cytosol	CYTOPLASM
A0A669KBD5;A0A669KBI7;Q9UMN6	KMT2B	A0A669KBD5;A0A669KBI7;Q9UMN6			NUCLEUS
A0A669KBH4;Q14999;Q14999-2	CUL7	A0A669KBH4;Q14999;Q14999-2	PROTEIN-COMPLEX	Protein Complex	CYTOPLASM
A0A669KBJ7;Q9H2P0	ADNP	A0A669KBJ7;Q9H2P0	NUCLEUS	Nucleus	NUCLEUS
A0A669KBK7;Q5T619	ZNF648	A0A669KBK7;Q5T619			TRANSLATION
A0A669KBL1;Q93009;Q93009-3	USP7	A0A669KBL1;Q93009;Q93009-3		Cytosol	CYTOPLASM
A0A6E1WCP9;H0YGT3;P11474;P11474-2	ESRRA	A0A6E1WCP9;H0YGT3;P11474;P11474-2		Nucleus	LD
A0A6I8PIS1;Q00796	SORD	A0A6I8PIS1;Q00796		Cytosol	CYTOPLASM
A0A6I8PIV1;Q9P2J5	LARS1	A0A6I8PIV1;Q9P2J5		Protein Complex	PROTEIN-COMPLEX
A0A6I8PL80;A0A6I8PS19;Q9NVN8	GNL3L	A0A6I8PL80;A0A6I8PS19;Q9NVN8			PM
A0A6I8PRM6;B1ALU3;O95490-2;O95490-5	ADGRL2	A0A6I8PRM6;B1ALU3;O95490-2;O95490-5		PM	PROTEIN-COMPLEX
A0A6I8PRS5;Q8N954	GPATCH11	A0A6I8PRS5;Q8N954			CYTOPLASM
A0A6I8PRV1;O75486;O75486-4	SUPT3H	A0A6I8PRV1;O75486;O75486-4			NUCLEUS
A0A6I8PS32;Q99615	DNAJC7	A0A6I8PS32;Q99615		Protein Complex	CYTOPLASM
A0A6I8PTZ8;Q9UL18	AGO1	A0A6I8PTZ8;Q9UL18		ER	ER
A0A6Q8JGF9;I3L1H5;Q9BZG8;Q9BZG8-2;Q9BZG8-3	DPH1	A0A6Q8JGF9;I3L1H5;Q9BZG8;Q9BZG8-2;Q9BZG8-3		Cytosol	CYTOPLASM
A0A6Q8JR05;Q6V0I7;Q6V0I7-3	FAT4	A0A6Q8JR05;Q6V0I7;Q6V0I7-3			GOLGI APPARATUS
A0A6Q8KRG2;Q08379	GOLGA2	A0A6Q8KRG2;Q08379	GOLGI APPARATUS	Golgi	GOLGI APPARATUS
A0A6Q8PEV5;A0A6Q8PF12;A0A6Q8PFB5;A0A6Q8PGX0;A0A6Q8PH03;Q9BYV8	CEP41	A0A6Q8PEV5;A0A6Q8PF12;A0A6Q8PFB5;A0A6Q8PGX0;A0A6Q8PH03;Q9BYV8		Cytosol	CYTOPLASM
A0A6Q8PEX6;A0A6Q8PFB7;A0A6Q8PG86;A0A6Q8PGW3;A0A6Q8PHF4;O95163	ELP1	A0A6Q8PEX6;A0A6Q8PFB7;A0A6Q8PG86;A0A6Q8PGW3;A0A6Q8PHF4;O95163	PROTEIN-COMPLEX	Cytosol	PROTEIN-COMPLEX
A0A6Q8PEZ3;A0A6Q8PFC0;A0A6Q8PFE6;Q9UKA9;Q9UKA9-2;Q9UKA9-3;Q9UKA9-4	PTBP2	A0A6Q8PEZ3;A0A6Q8PFC0;A0A6Q8PFE6;Q9UKA9;Q9UKA9-2;Q9UKA9-3;Q9UKA9-4		Nucleus	TRANSLATION
A0A6Q8PEZ7;A0A6Q8PG30;A0A6Q8PHQ1;Q96S66	CLCC1	A0A6Q8PEZ7;A0A6Q8PG30;A0A6Q8PHQ1;Q96S66	ER	ER	ER
A0A6Q8PF05;B4DHE8;Q96DH6;Q96DH6-2	MSI2	A0A6Q8PF05;B4DHE8;Q96DH6;Q96DH6-2		Endosome	ER
A0A6Q8PF23;Q96IV0	NGLY1	A0A6Q8PF23;Q96IV0		Cytosol	PROTEIN-COMPLEX
A0A6Q8PF35;A0A6Q8PG85;F5H875;F8VUA2;F8VVT7;Q9HD42	CHMP1A	A0A6Q8PF35;A0A6Q8PG85;F5H875;F8VUA2;F8VVT7;Q9HD42		Cytosol	CYTOPLASM
A0A6Q8PF40;A0A6Q8PFC4;A0A6Q8PFY7;A0A6Q8PG00;A0A6Q8PG04;A0A6Q8PGS4;A0A6Q8PH27;A0A6Q8PH89;Q92734;Q92734-2;Q92734-3;Q92734-4	TFG	A0A6Q8PF40;A0A6Q8PFC4;A0A6Q8PFY7;A0A6Q8PG00;A0A6Q8PG04;A0A6Q8PGS4;A0A6Q8PH27;A0A6Q8PH89;Q92734;Q92734-2;Q92734-3;Q92734-4		Cytosol	CYTOPLASM
A0A6Q8PF62;A0A6Q8PG59;A0A6Q8PGP4;A0A6Q8PGY7;A0A6Q8PHC7;A0A6Q8PHH5;Q92562	FIG4	A0A6Q8PF62;A0A6Q8PG59;A0A6Q8PGP4;A0A6Q8PGY7;A0A6Q8PHC7;A0A6Q8PHH5;Q92562	ENDOSOME-VESICLE	Protein Complex	PROTEIN-COMPLEX
A0A6Q8PF75;A0A6Q8PG39;A4D126;A4D126-2	CRPPA	A0A6Q8PF75;A0A6Q8PG39;A4D126;A4D126-2		Cytosol	CYTOPLASM
A0A6Q8PF83;A0A6Q8PGD1;A0A6Q8PH95;D6REX9;Q8N960;Q8N960-2	CEP120	A0A6Q8PF83;A0A6Q8PGD1;A0A6Q8PH95;D6REX9;Q8N960;Q8N960-2			TRANSLATION
A0A6Q8PF94;O15344	MID1	A0A6Q8PF94;O15344		Translation	TRANSLATION
A0A6Q8PFA6;A0A6Q8PH57;O00139;O00139-4;O00139-5	KIF2A	A0A6Q8PFA6;A0A6Q8PH57;O00139;O00139-4;O00139-5		Protein Complex	TRANSLATION
A0A6Q8PFE4	ACTB	A0A6Q8PFE4		Cytosol	nan
A0A6Q8PFH3;Q9H5K3	POMK	A0A6Q8PFH3;Q9H5K3		ER	GOLGI APPARATUS
A0A6Q8PFI7;A0A6Q8PGP5;A0A6Q8PHJ5;Q96PU5;Q96PU5-2;Q96PU5-3;Q96PU5-5;Q96PU5-6;Q96PU5-7	NEDD4L	A0A6Q8PFI7;A0A6Q8PGP5;A0A6Q8PHJ5;Q96PU5;Q96PU5-2;Q96PU5-3;Q96PU5-5;Q96PU5-6;Q96PU5-7		Cytosol	CYTOPLASM
A0A6Q8PFJ0;P02545	LMNA	A0A6Q8PFJ0;P02545	NUCLEUS	Nucleus	NUCLEUS
A0A6Q8PFK4;P50747	HLCS	A0A6Q8PFK4;P50747	CYTOPLASM	Cytosol	CYTOPLASM
A0A6Q8PFM5;A0A6Q8PG15;O95831;O95831-3	AIFM1	A0A6Q8PFM5;A0A6Q8PG15;O95831;O95831-3	MITOCHONDRIA	Mitochondria	MITOCHONDRIA
A0A6Q8PFP4;H3BNC0;Q9NVM4;Q9NVM4-3;Q9NVM4-4	PRMT7	A0A6Q8PFP4;H3BNC0;Q9NVM4;Q9NVM4-3;Q9NVM4-4		Golgi	CYTOPLASM
A0A6Q8PFT9;A0A6Q8PG02;A0A6Q8PGB2;A0A6Q8PGW1;Q6UWE0;Q6UWE0-2	LRSAM1	A0A6Q8PFT9;A0A6Q8PG02;A0A6Q8PGB2;A0A6Q8PGW1;Q6UWE0;Q6UWE0-2	CYTOPLASM	Cytosol	CYTOPLASM
A0A6Q8PFU2;E7ESJ3;Q9UPS8;Q9UPS8-2	ANKRD26	A0A6Q8PFU2;E7ESJ3;Q9UPS8;Q9UPS8-2			ER
A0A6Q8PFU3;P43034	PAFAH1B1	A0A6Q8PFU3;P43034	PROTEIN-COMPLEX	Cytosol	PROTEIN-COMPLEX
A0A6Q8PG35;A0A6Q8PGB9;A0A6Q8PHF8;E9PKE4;Q9HAB3	SLC52A2	A0A6Q8PG35;A0A6Q8PGB9;A0A6Q8PHF8;E9PKE4;Q9HAB3			PM
A0A6Q8PGI1	CALD1	A0A6Q8PGI1			nan
A0A6Q8PGJ2;Q9UG01;Q9UG01-2	IFT172	A0A6Q8PGJ2;Q9UG01;Q9UG01-2			PROTEIN-COMPLEX
A0A6Q8PGU6;Q8NB90	SPATA5	A0A6Q8PGU6;Q8NB90	CYTOPLASM	Cytosol	PROTEIN-COMPLEX
A0A6Q8PGV8;O95140	MFN2	A0A6Q8PGV8;O95140	MITOCHONDRIA	Mitochondria	MITOCHONDRIA
A0A6Q8PGZ8;P41250	GARS1	A0A6Q8PGZ8;P41250	CYTOPLASM	Cytosol	CYTOPLASM
A0A6Q8PH13;Q86WG5	SBF2	A0A6Q8PH13;Q86WG5		Protein Complex	TRANSLATION
A0A6Q8PH21;Q9UHW9;Q9UHW9-4;Q9UHW9-5	SLC12A6	A0A6Q8PH21;Q9UHW9;Q9UHW9-4;Q9UHW9-5	ENDOSOME-VESICLE	Endosome	ENDOSOME-VESICLE
A0A6Q8PH68;Q9UGU0;Q9UGU0-2	TCF20	A0A6Q8PH68;Q9UGU0;Q9UGU0-2			NUCLEUS
A0A6Q8PH71;A0A6Q8PHA2;A0A6Q8PHG2;Q27J81;Q27J81-2	INF2	A0A6Q8PH71;A0A6Q8PHA2;A0A6Q8PHG2;Q27J81;Q27J81-2		ER	ENDOSOME-VESICLE
A0A6Q8PHK0;Q14669-2	TRIP12	A0A6Q8PHK0;Q14669-2		Nucleus	MITOCHONDRIA
A0A6Q8PHP0;P49902;P49902-2	NT5C2	A0A6Q8PHP0;P49902;P49902-2		Cytosol	CYTOPLASM
A0AVF1;A0AVF1-2;A0AVF1-3;B7Z2T3;B7Z6R6	TTC26	A0AVF1;A0AVF1-2;A0AVF1-3;B7Z2T3;B7Z6R6			TRANSLATION
A0AVT1	UBA6	A0AVT1	CYTOPLASM	Cytosol	CYTOPLASM
A0JLT2;A0JLT2-2;J3KR33	MED19	A0JLT2;A0JLT2-2;J3KR33		Nucleus	LD
A0JNW5	UHRF1BP1L	A0JNW5		Protein Complex	PM
A0PJW6	TMEM223	A0PJW6	MITOCHONDRIA	Mitochondria	MITOCHONDRIA
A0PJZ3	GXYLT2	A0PJZ3		Endosome	GOLGI APPARATUS
A0PK00	TMEM120B	A0PK00		ER	GOLGI APPARATUS
A1A4S6	ARHGAP10	A1A4S6			TRANSLATION
A1A5C7;C9J4Z0	SLC22A23	A1A5C7;C9J4Z0		PM	GOLGI APPARATUS
A1L0T0	ILVBL	A1L0T0	ER	ER	ER
A1L188	NDUFAF8	A1L188			nan
A1L4H1	SSC5D	A1L4H1			NUCLEUS
A1X283	SH3PXD2B	A1X283		Protein Complex	CYTOPLASM
A1XBS5;A1XBS5-3;A1XBS5-4	FAM92A	A1XBS5;A1XBS5-3;A1XBS5-4		ER	PM
A2A274;Q99798	ACO2	A2A274;Q99798	MITOCHONDRIA	Mitochondria	MITOCHONDRIA
A2A2V1;P04156	PRNP	A2A2V1;P04156	PM	PM	ER
A2A2V2;P42696	RBM34	A2A2V2;P42696	NUCLEUS	Nucleus	NUCLEUS
A2A369;Q8NF50;Q8NF50-2;Q8NF50-3;Q8NF50-4	DOCK8	A2A369;Q8NF50;Q8NF50-2;Q8NF50-3;Q8NF50-4			GOLGI APPARATUS
A2A376;O95786;O95786-2	DDX58	A2A376;O95786;O95786-2		Cytosol	PROTEIN-COMPLEX
A2AJT9;A2AJT9-2;A2AJT9-3;F2Z385;H7BXX2	BCLAF3	A2AJT9;A2AJT9-2;A2AJT9-3;F2Z385;H7BXX2			NUCLEUS
A2RRP1	NBAS	A2RRP1	ER	ER	ER
A2RTX5	TARS3	A2RTX5		Protein Complex	PROTEIN-COMPLEX
A2RU37	LINC02872	A2RU37			GOLGI APPARATUS
A2RU67	FAM234B	A2RU67			ENDOSOME-VESICLE
A2RUC4	TYW5	A2RUC4		Cytosol	PROTEIN-COMPLEX
A2VDJ0;A2VDJ0-3;A2VDJ0-5	TMEM131L	A2VDJ0;A2VDJ0-3;A2VDJ0-5		PM	ER
A3KFL1;A3KFL2;Q13868;Q13868-3	EXOSC2	A3KFL1;A3KFL2;Q13868;Q13868-3	NUCLEUS	Cytosol	NUCLEUS
A3KMH1;A3KMH1-3	VWA8	A3KMH1;A3KMH1-3	MITOCHONDRIA	Mitochondria	MITOCHONDRIA
A4D1E9	GTPBP10	A4D1E9	MITOCHONDRIA	Mitochondria	MITOCHONDRIA
A4D1P6	WDR91	A4D1P6		PM	ER
A4D1S5;A4D1S5-2	RAB19	A4D1S5;A4D1S5-2	LD	Translation	LD
A4D2B0	MBLAC1	A4D2B0			CYTOPLASM
A5D8V6;F5H4Q5	VPS37C	A5D8V6;F5H4Q5		ER	CYTOPLASM
A5PLL7;A5PLL7-2	PEDS1	A5PLL7;A5PLL7-2	ER	ER	ER
A5PLN9;A5PLN9-2;A5PLN9-4;A5PLN9-5	TRAPPC13	A5PLN9;A5PLN9-2;A5PLN9-4;A5PLN9-5	PROTEIN-COMPLEX	Protein Complex	PROTEIN-COMPLEX
A5YKK6	CNOT1	A5YKK6		Protein Complex	TRANSLATION
A6NC48;Q10588	BST1	A6NC48;Q10588	PM	PM	ER
A6NCE7;H3BTL1;Q9GZQ8	MAP1LC3B2;MAP1LC3B;MAP1LC3B	A6NCE7;H3BTL1;Q9GZQ8		Translation	TRANSLATION
A6NCW0;A8MUK1;C9J2P7;C9JJH3;C9JLJ4;C9JPN9;C9JVI0;D6R901;D6R9N7;D6RA61;D6RBQ6;D6RCP7;D6RJB6;Q0WX57;Q7RTZ2	USP17L3;USP17L5;USP17L15;USP17L10;USP17L13;USP17L12;USP17L11;USP17L21;USP17L18;USP17L22;USP17L17;USP17L19;USP17L20;USP17L30;USP17L1	A6NCW0;A8MUK1;C9J2P7;C9JJH3;C9JLJ4;C9JPN9;C9JVI0;D6R901;D6R9N7;D6RA61;D6RBQ6;D6RCP7;D6RJB6;Q0WX57;Q7RTZ2			ENDOSOME-VESICLE
A6NDG6	PGP	A6NDG6		Cytosol	CYTOPLASM
A6NDU8	C5orf51	A6NDU8		Cytosol	CYTOPLASM
A6NEM2;P51610;P51610-2;P51610-4	HCFC1	A6NEM2;P51610;P51610-2;P51610-4	NUCLEUS	Nucleus	NUCLEUS
A6NF31;O75665;O75665-3	OFD1	A6NF31;O75665;O75665-3			GOLGI APPARATUS
A6NFX8;Q9UKK9	NUDT5	A6NFX8;Q9UKK9		Cytosol	CYTOPLASM
A6NFY7	SDHAF1	A6NFY7	MITOCHONDRIA	Mitochondria	MITOCHONDRIA
A6NGJ0;P51808	DYNLT3	A6NGJ0;P51808	PROTEIN-COMPLEX	Protein Complex	PROTEIN-COMPLEX
A6NGP5;Q9H910;Q9H910-3	JPT2	A6NGP5;Q9H910;Q9H910-3	CYTOPLASM	Cytosol	CYTOPLASM
A6NGU5;B5MCK8;P19440	GGT3P;GGT2;GGT1	A6NGU5;B5MCK8;P19440			GOLGI APPARATUS
A6NHB5;A6NHN7;Q14202;Q14202-2	ZMYM3	A6NHB5;A6NHN7;Q14202;Q14202-2			NUCLEUS
A6NHG8;Q13114	TRAF3	A6NHG8;Q13114		Protein Complex	PROTEIN-COMPLEX
A6NHJ8;A6NND8;O95825	CRYZL1	A6NHJ8;A6NND8;O95825	CYTOPLASM	Cytosol	CYTOPLASM
A6NHL2;A6NHL2-2	TUBAL3	A6NHL2;A6NHL2-2		Cytosol	GOLGI APPARATUS
A6NHR9;A6NHR9-2	SMCHD1	A6NHR9;A6NHR9-2	NUCLEUS	Nucleus	NUCLEUS
A6NI79	CCDC69	A6NI79		PM	PM
A6NIH7	UNC119B	A6NIH7		Cytosol	CYTOPLASM
A6NIT2;A6NMN0;P46020;P46020-2;P46020-3	PHKA1	A6NIT2;A6NMN0;P46020;P46020-2;P46020-3	PROTEIN-COMPLEX	Protein Complex	PROTEIN-COMPLEX
A6NIZ0;Q9GZM8;Q9GZM8-2;Q9GZM8-3	NDEL1	A6NIZ0;Q9GZM8;Q9GZM8-2;Q9GZM8-3		Cytosol	CYTOPLASM
A6NJ78	METTL15	A6NJ78		Mitochondria	MITOCHONDRIA
A6NJX0;Q9H4F1	ST6GALNAC4	A6NJX0;Q9H4F1	GOLGI APPARATUS	Golgi	GOLGI APPARATUS
A6NKD9;G3V4C8;H0YJE0;H0YJY5	CCDC85C	A6NKD9;G3V4C8;H0YJE0;H0YJY5			CYTOPLASM
A6NL99;B7Z4U2;O14520	AQP7P3;AQP7;AQP7	A6NL99;B7Z4U2;O14520		ER	ER
A6NLH6;Q9P003	CNIH4	A6NLH6;Q9P003	ER	ER	ER
A6NLN1;P26599;P26599-2;P26599-3	PTBP1	A6NLN1;P26599;P26599-2;P26599-3		Nucleus	TRANSLATION
A6NMH6;Q92599;Q92599-2;Q92599-4	SEPTIN8	A6NMH6;Q92599;Q92599-2;Q92599-4	CYTOPLASM	Protein Complex	CYTOPLASM
A6NMH8;E9PRJ8;H0YDJ9;H0YDL9;P60033	CD81	A6NMH8;E9PRJ8;H0YDJ9;H0YDL9;P60033		ER	GOLGI APPARATUS
A6NML8;C9J6U3;O60879-2	DIAPH2	A6NML8;C9J6U3;O60879-2		Cytosol	CYTOPLASM
A6NMQ3;O43768;O43768-2;O43768-3;O43768-4;O43768-9;Q5T5H1	ENSA	A6NMQ3;O43768;O43768-2;O43768-3;O43768-4;O43768-9;Q5T5H1		Cytosol	CYTOPLASM
A6NN50;O75147	OBSL1	A6NN50;O75147			PROTEIN-COMPLEX
A6NNK5;Q12888;Q12888-2	TP53BP1	A6NNK5;Q12888;Q12888-2	NUCLEUS	Nucleus	NUCLEUS
A6NP52;O60831	PRAF2	A6NP52;O60831	ER	ER	ER
A6PVP4;B7ZBQ3;Q9H944;Q9H944-2	MED20	A6PVP4;B7ZBQ3;Q9H944;Q9H944-2			LD
A6PW57;Q99755;Q99755-3	PIP5K1A	A6PW57;Q99755;Q99755-3			LYSOSOME
A6XND0;A6XND1;B3KWK7;P17936;P17936-2	IGFBP3	A6XND0;A6XND1;B3KWK7;P17936;P17936-2			LD
A6ZKI3;Q9BWD3	RTL8C;RTL8A	A6ZKI3;Q9BWD3			CYTOPLASM
A7E2V4;A7E2V4-3;A7E2V4-4;A7E2V4-5;S4R393;S4R410	ZSWIM8	A7E2V4;A7E2V4-3;A7E2V4-4;A7E2V4-5;S4R393;S4R410	CYTOPLASM	Cytosol	PROTEIN-COMPLEX
A7MCY6	TBKBP1	A7MCY6			GOLGI APPARATUS
A8CG34	POM121C	A8CG34		Nucleus	NUCLEUS
A8DPD7;Q9C0D3	ZYG11B	A8DPD7;Q9C0D3		Cytosol	CYTOPLASM
A8K7Q2	HSPA8	A8K7Q2		Cytosol	nan
A8KAH6;Q16082	HSPB2-C11orf52;HSPB2	A8KAH6;Q16082		Cytosol	CYTOPLASM
A8MPU2;C9JBU8;O14713	ITGB1BP1	A8MPU2;C9JBU8;O14713			CYTOPLASM
A8MQB8;G3V0J0;Q06787-2	FMR1	A8MQB8;G3V0J0;Q06787-2		Golgi	NUCLEUS
A8MSI8;D6RAR2;D6RFL2;J3KTA2	LYRM9;LYRM9;LYRM9;ENSG00000266202	A8MSI8;D6RAR2;D6RFL2;J3KTA2			MITOCHONDRIA
A8MSY1;Q86TL2	STIMATE-MUSTN1;STIMATE	A8MSY1;Q86TL2			GOLGI APPARATUS
A8MTT3	CEBPZOS	A8MTT3		Mitochondria	LD
A8MU27;A8MUA9;P55854;P55854-2	SUMO3	A8MU27;A8MUA9;P55854;P55854-2		Cytosol	CYTOPLASM
A8MUM1;Q53HC9	EIPR1	A8MUM1;Q53HC9		Cytosol	CYTOPLASM
A8MVV6;E9PN41;J3KQ42;O14817	TSPAN4	A8MVV6;E9PN41;J3KQ42;O14817			GOLGI APPARATUS
A8MVW0	FAM171A2	A8MVW0		PM	MITOCHONDRIA
A8MWY0	ELAPOR2	A8MWY0		Golgi	ENDOSOME-VESICLE
A8MXB7;Q9Y343	SNX24	A8MXB7;Q9Y343		Protein Complex	CYTOPLASM
A8MXP9	MATR3	A8MXP9	NUCLEUS	Nucleus	NUCLEUS
A8MXV4	NUDT19	A8MXV4	MITOCHONDRIA	Mitochondria	MITOCHONDRIA
A9X3U0;Q96GF1	RNF185	A9X3U0;Q96GF1	LD	ER	ER
A9Z1X7;E9PCT1;Q8IYB3;Q8IYB3-2	SRRM1	A9Z1X7;E9PCT1;Q8IYB3;Q8IYB3-2		Nucleus	NUCLEUS
B0QY89;Q9Y262	EIF3L	B0QY89;Q9Y262	TRANSLATION	Translation	TRANSLATION
B0QY95;Q9NQG6	MIEF1	B0QY95;Q9NQG6	MITOCHONDRIA	Cytosol	MITOCHONDRIA
B0QYK0;Q01844;Q01844-3;Q01844-5;Q01844-6	EWSR1	B0QYK0;Q01844;Q01844-3;Q01844-5;Q01844-6		Protein Complex	CYTOPLASM
B0QYN7;H3BQQ9;P63279	UBE2I	B0QYN7;H3BQQ9;P63279		Cytosol	CYTOPLASM
B0QYS6;B0QYS7;P19484	TFEB	B0QYS6;B0QYS7;P19484	CYTOPLASM		CYTOPLASM
B0QZ40;Q7Z4G1;Q7Z4G1-2	COMMD6	B0QZ40;Q7Z4G1;Q7Z4G1-2			nan
B0YJ81	HACD1	B0YJ81	ER		ER
B1AHL2	FBLN1	B1AHL2			LD
B1AK88;P47756-2	CAPZB	B1AK88;P47756-2	PROTEIN-COMPLEX		PROTEIN-COMPLEX
B1AKL4;Q9NRA8;Q9NRA8-3	EIF4ENIF1	B1AKL4;Q9NRA8;Q9NRA8-3		Protein Complex	TRANSLATION
B1AKR6;Q9NP97	DYNLRB1	B1AKR6;Q9NP97	PROTEIN-COMPLEX	Cytosol	PROTEIN-COMPLEX
B1AKY9;P50993	ATP1A2	B1AKY9;P50993			PEROXISOME
B1AL05;H0Y6Y8;Q8N983;Q8N983-2;Q8N983-3;Q8N983-4;Q8N983-6;Q8N983-7	MRPL43	B1AL05;H0Y6Y8;Q8N983;Q8N983-2;Q8N983-3;Q8N983-4;Q8N983-6;Q8N983-7	MITOCHONDRIA	Mitochondria	MITOCHONDRIA
B1AL69;Q7L3B6	CDC37L1	B1AL69;Q7L3B6	CYTOPLASM	Cytosol	CYTOPLASM
B1ALD0;Q9Y6B7	AP4B1	B1ALD0;Q9Y6B7	ENDOSOME-VESICLE	Cytosol	PROTEIN-COMPLEX
B1ALM5;Q9P0T7	TMEM9	B1ALM5;Q9P0T7	ENDOSOME-VESICLE	ER	ENDOSOME-VESICLE
B1ALY0;Q8IXS6-2	PALM2AKAP2;PALM2	B1ALY0;Q8IXS6-2			CYTOPLASM
B1AMS2;Q14141;Q14141-2;Q14141-4	SEPTIN6	B1AMS2;Q14141;Q14141-2;Q14141-4		Cytosol	ENDOSOME-VESICLE
B1AMU3;B1AMU4;Q9Y3B2;R4GMQ7;R4GNH9	EXOSC1	B1AMU3;B1AMU4;Q9Y3B2;R4GMQ7;R4GNH9	NUCLEUS	Nucleus	NUCLEUS
B1AMW1;P19256;P19256-2;P19256-3	CD58	B1AMW1;P19256;P19256-2;P19256-3	PM	PM	ER
B1ANH0;B1ANH2;Q16774;Q16774-2	GUK1	B1ANH0;B1ANH2;Q16774;Q16774-2	MITOCHONDRIA	Cytosol	CYTOPLASM
B1AP13;H3BLV0;H7BY55;P08174;P08174-2;P08174-3;P08174-4;P08174-5;P08174-6;P08174-7	CD55	B1AP13;H3BLV0;H7BY55;P08174;P08174-2;P08174-3;P08174-4;P08174-5;P08174-6;P08174-7		ER	LD
B1AP22;P49810;P49810-3	PSEN2	B1AP22;P49810;P49810-3		PM	ER
B1APR7;Q99504;Q99504-2;Q99504-4;Q99504-5	EYA3	B1APR7;Q99504;Q99504-2;Q99504-4;Q99504-5			PROTEIN-COMPLEX
B1AVT0;P49760;P49760-3	CLK2	B1AVT0;P49760;P49760-3		Nucleus	LD
B2R5W2;B4DY08;G3V4W0;P07910-2	HNRNPC	B2R5W2;B4DY08;G3V4W0;P07910-2	NUCLEUS	Nucleus	NUCLEUS
B2RNG4;Q9BYJ4;Q9BYJ4-2	TRIM6-TRIM34;TRIM34;TRIM34	B2RNG4;Q9BYJ4;Q9BYJ4-2			NUCLEUS
B2RTY4;B2RTY4-2;B2RTY4-4	MYO9A	B2RTY4;B2RTY4-2;B2RTY4-4	PROTEIN-COMPLEX		PROTEIN-COMPLEX
B2WTI3;B2WTI4;K7EJU9;Q6NYC1;Q6NYC1-2;Q6NYC1-3	JMJD6	B2WTI3;B2WTI4;K7EJU9;Q6NYC1;Q6NYC1-2;Q6NYC1-3		Protein Complex	LD
B3KT51;E7EPS7;H0YNF6;H0YNS4;Q9BRN9;Q9BRN9-2	TM2D3	B3KT51;E7EPS7;H0YNF6;H0YNS4;Q9BRN9;Q9BRN9-2			MITOCHONDRIA
B3KTM8;Q9UBU8-2	MORF4L1	B3KTM8;Q9UBU8-2	NUCLEUS		NUCLEUS
B3KUS5;Q70CQ3	USP30	B3KUS5;Q70CQ3	MITOCHONDRIA	Mitochondria	MITOCHONDRIA
B3KW70;F5GYX4;H0YG03;Q13361;Q13361-2	MFAP5	B3KW70;F5GYX4;H0YG03;Q13361;Q13361-2		Mitochondria	LD
B3KY94;O14735;O14735-3	CDIPT	B3KY94;O14735;O14735-3	ER	ER	ER
B4DDD6	DBNL	B4DDD6		Cytosol	CYTOPLASM
B4DDF4;B4DUT8;Q99439	CNN2	B4DDF4;B4DUT8;Q99439		Cytosol	CYTOPLASM
B4DEE8;P16455	MGMT	B4DEE8;P16455		Cytosol	CYTOPLASM
B4DFC0;E9PMV6;E9PR50;G3V1B4;Q9UGK8;Q9UGK8-2	SERGEF	B4DFC0;E9PMV6;E9PR50;G3V1B4;Q9UGK8;Q9UGK8-2		Cytosol	CYTOPLASM
B4DGI9;Q99081;Q99081-3	TCF12	B4DGI9;Q99081;Q99081-3			NUCLEUS
B4DJV2;O75390	CS	B4DJV2;O75390	MITOCHONDRIA	Mitochondria	MITOCHONDRIA
B4DJV5;Q13610	PWP1	B4DJV5;Q13610		Cytosol	TRANSLATION
B4DK77;Q9H6K4	OPA3	B4DK77;Q9H6K4		Cytosol	MITOCHONDRIA
B4DL54	CHURC1-FNTB	B4DL54		Cytosol	CYTOPLASM
B4DLP0;B8ZZF7;O00338;O00338-2	SULT1C2	B4DLP0;B8ZZF7;O00338;O00338-2			LD
B4DP62	SLC25A1	B4DP62	MITOCHONDRIA		MITOCHONDRIA
B4DR61;P61619	SEC61A1	B4DR61;P61619	ER	ER	ER
B4DR80;Q9Y6E0;Q9Y6E0-2	STK24	B4DR80;Q9Y6E0;Q9Y6E0-2		Protein Complex	CYTOPLASM
B4DRN8;Q5W0Z9;Q5W0Z9-3;Q5W0Z9-4	ZDHHC20	B4DRN8;Q5W0Z9;Q5W0Z9-3;Q5W0Z9-4			GOLGI APPARATUS
B4DUA7;Q9NX70	MED29	B4DUA7;Q9NX70			NUCLEUS
B4DUC8;Q13126	MTAP	B4DUC8;Q13126	CYTOPLASM	Cytosol	CYTOPLASM
B4DUD2;C9IYT2;C9IZ27;C9JEN3;C9JW19;C9JWV9;F8WDY4;Q969X1	TMBIM1	B4DUD2;C9IYT2;C9IZ27;C9JEN3;C9JW19;C9JWV9;F8WDY4;Q969X1			nan
B4DVN3;E7ESC7;Q7L5Y9;Q7L5Y9-3	MAEA	B4DVN3;E7ESC7;Q7L5Y9;Q7L5Y9-3		Protein Complex	PROTEIN-COMPLEX
B4DWG0;O95199;O95199-2	RCBTB2	B4DWG0;O95199;O95199-2			LD
B4DWH1;Q9Y6I8;Q9Y6I8-2	PXMP4	B4DWH1;Q9Y6I8;Q9Y6I8-2		PM	MITOCHONDRIA
B4DXZ6;P51114	FXR1	B4DXZ6;P51114		Golgi	ER
B4DYU2;Q96MW5	COG8	B4DYU2;Q96MW5			PROTEIN-COMPLEX
B4DYW4;E9PPH4;Q86VG3	IFTAP	B4DYW4;E9PPH4;Q86VG3	CYTOPLASM		CYTOPLASM
B4E0E3;G3V1M5;Q9H6X4;Q9H6X4-2;Q9H6X4-3	TMEM134	B4E0E3;G3V1M5;Q9H6X4;Q9H6X4-2;Q9H6X4-3		Endosome	ENDOSOME-VESICLE
B4E0K5;Q16539	MAPK14	B4E0K5;Q16539		Cytosol	CYTOPLASM
B4E0T2;P50542;P50542-3;P50542-4	PEX5	B4E0T2;P50542;P50542-3;P50542-4	CYTOPLASM	Protein Complex	CYTOPLASM
B4E0Y9;Q8NBY1;Q9P289	STK26	B4E0Y9;Q8NBY1;Q9P289			CYTOPLASM
B4E107;F5GXE4;O95260-2	ATE1	B4E107;F5GXE4;O95260-2		Cytosol	CYTOPLASM
B4E1G1;E5RGY0;Q9BUN8;Q9BUN8-2	DERL1	B4E1G1;E5RGY0;Q9BUN8;Q9BUN8-2		Cytosol	ER
B4E1N1;Q6NXE6;Q6NXE6-2	ARMC6	B4E1N1;Q6NXE6;Q6NXE6-2	CYTOPLASM	Cytosol	CYTOPLASM
B4E1Q4;O14730	RIOK3	B4E1Q4;O14730		Cytosol	PROTEIN-COMPLEX
B4E2Q0;P98194;P98194-4	ATP2C1	B4E2Q0;P98194;P98194-4		ER	GOLGI APPARATUS
B4E3L3;G3V1N5;Q96RU2;Q96RU2-2	USP28	B4E3L3;G3V1N5;Q96RU2;Q96RU2-2			NUCLEUS
B4E3T4;Q93062;Q93062-2;Q93062-3;Q93062-4;Q93062-5	RBPMS	B4E3T4;Q93062;Q93062-2;Q93062-3;Q93062-4;Q93062-5		Nucleus	CYTOPLASM
B5MBX2;F8WE86;P20062	TCN2	B5MBX2;F8WE86;P20062			ENDOSOME-VESICLE
B5MBZ0;Q9HC35	EML4	B5MBZ0;Q9HC35		Translation	TRANSLATION
B5MC02;C9JLP2;Q8NFT2;Q8NFT2-2;Q8NFT2-3	STEAP2	B5MC02;C9JLP2;Q8NFT2;Q8NFT2-2;Q8NFT2-3	ENDOSOME-VESICLE	PM	GOLGI APPARATUS
B5MC20;P0C870	JMJD7	B5MC20;P0C870	CYTOPLASM	Cytosol	CYTOPLASM
B5MC22;Q9UDX5	MTFP1	B5MC22;Q9UDX5		Mitochondria	MITOCHONDRIA
B5MC53;B5MCF8;G5E9F5;P39210	MPV17	B5MC53;B5MCF8;G5E9F5;P39210	MITOCHONDRIA	Mitochondria	MITOCHONDRIA
B5MCD7;O43759;O43759-2	SYNGR1	B5MCD7;O43759;O43759-2		Endosome	ENDOSOME-VESICLE
B5MCF4;C9JDC5;P05230;P05230-2	FGF1	B5MCF4;C9JDC5;P05230;P05230-2			CYTOPLASM
B5MCF9;O00541	PES1	B5MCF9;O00541		Nucleus	NUCLEUS
B5MCN7;Q15788;Q15788-2;Q15788-3	NCOA1	B5MCN7;Q15788;Q15788-2;Q15788-3		Nucleus	LD
B5MCR8;Q6NXT4;Q6NXT4-2;Q6NXT4-4	SLC30A6	B5MCR8;Q6NXT4;Q6NXT4-2;Q6NXT4-4		Golgi	GOLGI APPARATUS
B5MCX7;D3YTC9;F8WB76;H7C3L3;Q6NXT1;Q6NXT1-2	ANKRD54	B5MCX7;D3YTC9;F8WB76;H7C3L3;Q6NXT1;Q6NXT1-2			CYTOPLASM
B5MD46;F8WCD1;Q9BXI6;Q9BXI6-2	TBC1D10A	B5MD46;F8WCD1;Q9BXI6;Q9BXI6-2			CYTOPLASM
B5MDF5;J3KQE5;P62826	RAN	B5MDF5;J3KQE5;P62826		Cytosol	CYTOPLASM
B5MDL5;P53778;P53778-2	MAPK12	B5MDL5;P53778;P53778-2	NUCLEUS	Cytosol	CYTOPLASM
B5MDU6;Q9H6V9;Q9H6V9-2	LDAH	B5MDU6;Q9H6V9;Q9H6V9-2	LD	ER	LD
B5ME97;E7EW69;E7EX04;Q9P0V9;Q9P0V9-2;Q9P0V9-3	SEPTIN10	B5ME97;E7EW69;E7EX04;Q9P0V9;Q9P0V9-2;Q9P0V9-3		Cytosol	LD
B7WP74;Q9HCG8	CWC22	B7WP74;Q9HCG8	NUCLEUS	Nucleus	NUCLEUS
B7WPE2;Q32P44	EML3	B7WPE2;Q32P44		Protein Complex	TRANSLATION
B7WPG3;C9IYN3;Q8WVV9;Q8WVV9-4;Q8WVV9-5;V9GYK2	HNRNPLL	B7WPG3;C9IYN3;Q8WVV9;Q8WVV9-4;Q8WVV9-5;V9GYK2		Translation	TRANSLATION
B7WPJ3;Q8WTX7	CASTOR1	B7WPJ3;Q8WTX7			CYTOPLASM
B7WPL9;Q6PFW1;Q6PFW1-2;Q6PFW1-3;Q6PFW1-7	PPIP5K1	B7WPL9;Q6PFW1;Q6PFW1-2;Q6PFW1-3;Q6PFW1-7	CYTOPLASM	Cytosol	CYTOPLASM
B7Z2R7;Q5T8D3;Q5T8D3-2;Q5T8D3-3;Q5T8D3-4	ACBD5	B7Z2R7;Q5T8D3;Q5T8D3-2;Q5T8D3-3;Q5T8D3-4		Cytosol	MITOCHONDRIA
B7Z493;E9PJX4;F8VWL3;Q96M96	FGD4	B7Z493;E9PJX4;F8VWL3;Q96M96		Cytosol	ENDOSOME-VESICLE
B7Z4C8;B7Z4E3;C9JU56;H7C2W9;P62899;P62899-2;P62899-3	RPL31	B7Z4C8;B7Z4E3;C9JU56;H7C2W9;P62899;P62899-2;P62899-3	TRANSLATION	Translation	TRANSLATION
B7Z4L1;B7Z4U3;E7EPD9;E7EPW5;E9PCV1;G3XAH9;H7BXS2;Q9NRC1-2;Q9NRC1-3;Q9NRC1-4;Q9NRC1-5;Q9NRC1-6	ST7	B7Z4L1;B7Z4U3;E7EPD9;E7EPW5;E9PCV1;G3XAH9;H7BXS2;Q9NRC1-2;Q9NRC1-3;Q9NRC1-4;Q9NRC1-5;Q9NRC1-6		PM	ER
B7Z6D5;Q96GQ7	DDX27	B7Z6D5;Q96GQ7		Nucleus	NUCLEUS
B7Z6Q0;Q12980	NPRL3	B7Z6Q0;Q12980		Protein Complex	TRANSLATION
B7Z6T3;E9PCX5;Q8NDZ6	TMEM161B	B7Z6T3;E9PCX5;Q8NDZ6			NUCLEUS
B7Z7P8;P62495;P62495-2	ETF1	B7Z7P8;P62495;P62495-2		Cytosol	CYTOPLASM
B7Z9I1;P11310;P11310-2;Q5T4U5	ACADM	B7Z9I1;P11310;P11310-2;Q5T4U5	MITOCHONDRIA	Mitochondria	MITOCHONDRIA
B7ZAQ6;B7ZAQ6-2;B7ZAQ6-3;P0CG08	GPR89A;GPR89A;GPR89A;GPR89B	B7ZAQ6;B7ZAQ6-2;B7ZAQ6-3;P0CG08			GOLGI APPARATUS
B7ZBD4;E7EWW3;F2Z2T3;F2Z3J7;Q9UBK7;Q9UBK7-2;Q9UBK7-3;Q9UNT1;Q9UNT1-2;Q9UNT1-3	RABL2A;RABL2A;RABL2B;RABL2B;RABL2A;RABL2A;RABL2A;RABL2B;RABL2B;RABL2B	B7ZBD4;E7EWW3;F2Z2T3;F2Z3J7;Q9UBK7;Q9UBK7-2;Q9UBK7-3;Q9UNT1;Q9UNT1-2;Q9UNT1-3		Cytosol	CYTOPLASM
B7ZBK1;P00742;Q5JVE8	F10	B7ZBK1;P00742;Q5JVE8		Nucleus	NUCLEUS
B7ZC38;Q9NR46	SH3GLB2	B7ZC38;Q9NR46	CYTOPLASM	Cytosol	CYTOPLASM
B7ZKJ3;B7ZKW7;P54756;P54756-2;P54756-3	EPHA5	B7ZKJ3;B7ZKW7;P54756;P54756-2;P54756-3			PROTEIN-COMPLEX
B7ZKJ8;Q14624;Q14624-2;Q14624-3	ITIH4	B7ZKJ8;Q14624;Q14624-2;Q14624-3			NUCLEUS
B7ZKQ9;Q8WTV0-2;Q8WTV0-4	SCARB1	B7ZKQ9;Q8WTV0-2;Q8WTV0-4		PM	ER
B7ZL88;Q8N8Q8	COX18	B7ZL88;Q8N8Q8	MITOCHONDRIA	Mitochondria	MITOCHONDRIA
B7ZLQ5;P28370	SMARCA1	B7ZLQ5;P28370	NUCLEUS		NUCLEUS
B7ZLQ8;E5RJM0;Q17RY0;Q17RY0-2	CPEB4	B7ZLQ8;E5RJM0;Q17RY0;Q17RY0-2		Endosome	TRANSLATION
B7ZM79;Q5VT82;Q9HC56;Q9HC56-2	PCDH9	B7ZM79;Q5VT82;Q9HC56;Q9HC56-2			PROTEIN-COMPLEX
B7ZM87	SRGAP2	B7ZM87		Protein Complex	CYTOPLASM
B7ZM99	MTHFD1L	B7ZM99	MITOCHONDRIA	Mitochondria	MITOCHONDRIA
B8ZZ45;C9JIH3;Q4AE62;Q4AE62-2;Q4AE62-3;Q4AE62-4	GTDC1	B8ZZ45;C9JIH3;Q4AE62;Q4AE62-2;Q4AE62-3;Q4AE62-4			CYTOPLASM
B8ZZ47;H0Y714;Q96G21	IMP4	B8ZZ47;H0Y714;Q96G21	NUCLEUS		NUCLEUS
B8ZZA1;B8ZZQ6;B8ZZW7;H7C2N1;P06454;P06454-2	PTMA	B8ZZA1;B8ZZQ6;B8ZZW7;H7C2N1;P06454;P06454-2		Cytosol	CYTOPLASM
B8ZZC8;B8ZZE3;B8ZZY8;Q9NRN9	METTL5	B8ZZC8;B8ZZE3;B8ZZY8;Q9NRN9			CYTOPLASM
B8ZZD4;Q86VP1;Q86VP1-2	TAX1BP1	B8ZZD4;Q86VP1;Q86VP1-2	ENDOSOME-VESICLE	Endosome	ENDOSOME-VESICLE
B8ZZG1;Q9NZW5	MPP6	B8ZZG1;Q9NZW5		PM	CYTOPLASM
B8ZZI5;O75716	STK16	B8ZZI5;O75716		Cytosol	ENDOSOME-VESICLE
B8ZZJ6;H7C1S9;Q8TD22	SFXN5	B8ZZJ6;H7C1S9;Q8TD22	MITOCHONDRIA	Mitochondria	MITOCHONDRIA
B8ZZK5;O43924	PDE6D	B8ZZK5;O43924		Cytosol	CYTOPLASM
B8ZZN6;P63165	SUMO1	B8ZZN6;P63165		Nucleus	CYTOPLASM
B8ZZU6;P15336;P15336-5	ATF2	B8ZZU6;P15336;P15336-5			NUCLEUS
B8ZZV9;B8ZZX2;Q9H8M1;Q9H8M1-2	COQ10B	B8ZZV9;B8ZZX2;Q9H8M1;Q9H8M1-2	MITOCHONDRIA	Mitochondria	MITOCHONDRIA
B8ZZZ1;F8W8K9;G5E966;Q96PC3;Q96PC3-2;Q96PC3-3;Q96PC3-4	AP1S3	B8ZZZ1;F8W8K9;G5E966;Q96PC3;Q96PC3-2;Q96PC3-3;Q96PC3-4			ENDOSOME-VESICLE
B9A057;Q86WW8	COA5	B9A057;Q86WW8		Mitochondria	MITOCHONDRIA
B9EGA3;J3KMX2;Q92925;Q92925-2;Q92925-3	SMARCD2	B9EGA3;J3KMX2;Q92925;Q92925-2;Q92925-3		Nucleus	NUCLEUS
B9TWZ6;K7EKS6;Q9Y2X0;Q9Y2X0-2;Q9Y2X0-3;Q9Y2X0-4;Q9Y2X0-5;U3KQ43;U3KQB4	MED16	B9TWZ6;K7EKS6;Q9Y2X0;Q9Y2X0-2;Q9Y2X0-3;Q9Y2X0-4;Q9Y2X0-5;U3KQ43;U3KQB4			PROTEIN-COMPLEX
B9ZVN9;O95602	POLR1A	B9ZVN9;O95602	PROTEIN-COMPLEX	Nucleus	PROTEIN-COMPLEX
C4AMC7;Q6VEQ5	WASH3P;WASH2P	C4AMC7;Q6VEQ5		Protein Complex	CYTOPLASM
C4B7M2;Q96JI7;Q96JI7-2	SPG11	C4B7M2;Q96JI7;Q96JI7-2			PROTEIN-COMPLEX
C9IYC4;Q9UK00;Q9UK00-2	C3orf18	C9IYC4;Q9UK00;Q9UK00-2			ENDOSOME-VESICLE
C9IZ93;C9J9P8;C9JF62;Q969M7;Q969M7-2;Q969M7-3;Q969M7-7	UBE2F	C9IZ93;C9J9P8;C9JF62;Q969M7;Q969M7-2;Q969M7-3;Q969M7-7	CYTOPLASM	PM	CYTOPLASM
C9IZF6;P41247;P41247-2	PNPLA4	C9IZF6;P41247;P41247-2	MITOCHONDRIA		MITOCHONDRIA
C9IZU8;C9J9T0;Q96AT9	RPE	C9IZU8;C9J9T0;Q96AT9	CYTOPLASM	Cytosol	CYTOPLASM
C9J066;Q8N4C6;Q8N4C6-10;Q8N4C6-2;Q8N4C6-4;Q8N4C6-5;Q8N4C6-7;Q8N4C6-9	NIN	C9J066;Q8N4C6;Q8N4C6-10;Q8N4C6-2;Q8N4C6-4;Q8N4C6-5;Q8N4C6-7;Q8N4C6-9			PROTEIN-COMPLEX
C9J0E4;P01040	CSTA	C9J0E4;P01040	CYTOPLASM	Cytosol	CYTOPLASM
C9J0I9;Q86WB0;Q86WB0-2	ZC3HC1	C9J0I9;Q86WB0;Q86WB0-2		Nucleus	CYTOPLASM
C9J0J0;Q96EE4	CCDC126	C9J0J0;Q96EE4	GOLGI APPARATUS	Golgi	GOLGI APPARATUS
C9J0J7;G5E9Q6;P35080-2	PFN2	C9J0J7;G5E9Q6;P35080-2		Cytosol	CYTOPLASM
C9J0K6;P30626;P30626-2	SRI	C9J0K6;P30626;P30626-2	CYTOPLASM	Cytosol	CYTOPLASM
C9J0Q5;C9JE98	NCOR2	C9J0Q5;C9JE98	NUCLEUS	Nucleus	NUCLEUS
C9J0T6;H7C1P7;Q9H0T7	RAB17	C9J0T6;H7C1P7;Q9H0T7			CYTOPLASM
C9J0Y3	GOLGA4	C9J0Y3		Golgi	GOLGI APPARATUS
C9J1P0;C9JZB1;Q96HH4	TMEM169	C9J1P0;C9JZB1;Q96HH4		PM	ENDOSOME-VESICLE
C9J2C0;Q9NY65;Q9NY65-2	TUBA8	C9J2C0;Q9NY65;Q9NY65-2			LD
C9J2H1;G5E9D8;Q86UX2;Q86UX2-2	ITIH5	C9J2H1;G5E9D8;Q86UX2;Q86UX2-2		PM	PROTEIN-COMPLEX
C9J2P9;Q75N03;Q75N03-2	CBLL1	C9J2P9;Q75N03;Q75N03-2		Nucleus	NUCLEUS
C9J2Y9;P30876	POLR2B	C9J2Y9;P30876	PROTEIN-COMPLEX	Protein Complex	PROTEIN-COMPLEX
C9J384;Q9BQ75;Q9BQ75-2	CMSS1	C9J384;Q9BQ75;Q9BQ75-2			TRANSLATION
C9J3D7;Q9UKG9;Q9UKG9-3	CROT	C9J3D7;Q9UKG9;Q9UKG9-3			LYSOSOME
C9J406	IMMT	C9J406	MITOCHONDRIA	Mitochondria	MITOCHONDRIA
C9J494;Q9H000	MKRN2	C9J494;Q9H000	CYTOPLASM	Protein Complex	CYTOPLASM
C9J4B6;G5E9P4;Q8N755;Q8N755-2	SLC66A3	C9J4B6;G5E9P4;Q8N755;Q8N755-2			LD
C9J4I9	PXDN	C9J4I9			LD
C9J4Z3;P61513	RPL37A	C9J4Z3;P61513	TRANSLATION	Translation	TRANSLATION
C9J5N1;Q9BTE6;Q9BTE6-2;Q9BTE6-3	PTGES3L-AARSD1;AARSD1;AARSD1;AARSD1	C9J5N1;Q9BTE6;Q9BTE6-2;Q9BTE6-3	CYTOPLASM	Cytosol	CYTOPLASM
C9J5X1;P08069	IGF1R	C9J5X1;P08069			GOLGI APPARATUS
C9J623;C9JG63;H7C3Y6;Q7Z698;Q7Z698-2	SPRED2	C9J623;C9JG63;H7C3Y6;Q7Z698;Q7Z698-2			TRANSLATION
C9J6P4	ZC3HAV1	C9J6P4		PM	TRANSLATION
C9J798;E7ERK1;F5GXT2;F8W6L0;O43374;O43374-2	RASA4B;RASA4;RASA4B;RASA4B;RASA4;RASA4	C9J798;E7ERK1;F5GXT2;F8W6L0;O43374;O43374-2			GOLGI APPARATUS
C9J7E5;Q9Y5L0;Q9Y5L0-1;Q9Y5L0-3	TNPO3	C9J7E5;Q9Y5L0;Q9Y5L0-1;Q9Y5L0-3		Cytosol	CYTOPLASM
C9J7I0	UMAD1	C9J7I0		Cytosol	CYTOPLASM
C9J7K9;O15162;O15162-2	PLSCR1	C9J7K9;O15162;O15162-2	NUCLEUS		LYSOSOME
C9J813	CALD1	C9J813			CYTOPLASM
C9J8E1;Q16644	MAPKAPK3	C9J8E1;Q16644		Cytosol	CYTOPLASM
C9J8U3;Q7Z2E3;Q7Z2E3-10;Q7Z2E3-11;Q7Z2E3-5;Q7Z2E3-7;Q7Z2E3-9	APTX	C9J8U3;Q7Z2E3;Q7Z2E3-10;Q7Z2E3-11;Q7Z2E3-5;Q7Z2E3-7;Q7Z2E3-9		Nucleus	TRANSLATION
C9J9M8;C9JRX4;Q86Y13;Q86Y13-2	DZIP3	C9J9M8;C9JRX4;Q86Y13;Q86Y13-2			LD
C9J9Z5;J3KQ06;Q9NWC5	TMEM45A	C9J9Z5;J3KQ06;Q9NWC5			ENDOSOME-VESICLE
C9JA08;Q96D46	NMD3	C9JA08;Q96D46		Cytosol	TRANSLATION
C9JA28;Q9UNL2;Q9UNL2-2	SSR3	C9JA28;Q9UNL2;Q9UNL2-2		Mitochondria	GOLGI APPARATUS
C9JAW5;C9JNU6;Q9Y241	ENSG00000280571;HIGD1A;HIGD1A	C9JAW5;C9JNU6;Q9Y241		Mitochondria	nan
C9JAX1;Q16595	FXN	C9JAX1;Q16595	MITOCHONDRIA	Mitochondria	MITOCHONDRIA
C9JBG5;Q8NBJ9;Q8NBJ9-2	SIDT2	C9JBG5;Q8NBJ9;Q8NBJ9-2		ER	ER
C9JBI3;P78330	PSPH	C9JBI3;P78330	CYTOPLASM	Cytosol	CYTOPLASM
C9JBX0;F5H0R1;H3BRB1;Q9H6E5	TUT1;TUT1;ENSG00000255508;TUT1	C9JBX0;F5H0R1;H3BRB1;Q9H6E5		Cytosol	NUCLEUS
C9JBY7;Q9Y291	MRPS33	C9JBY7;Q9Y291	MITOCHONDRIA	Mitochondria	MITOCHONDRIA
C9JC84;C9JEU5;P02679;P02679-2	FGG	C9JC84;C9JEU5;P02679;P02679-2			LD
C9JCC6;Q14919;Q14919-2	DRAP1	C9JCC6;Q14919;Q14919-2	CYTOPLASM	Cytosol	CYTOPLASM
C9JDJ8;C9JNZ0;C9JRY4;Q96IW7	SEC22A	C9JDJ8;C9JNZ0;C9JRY4;Q96IW7	GOLGI APPARATUS	Golgi	GOLGI APPARATUS
C9JEA7;Q9BRC7	PLCD4	C9JEA7;Q9BRC7	CYTOPLASM	Cytosol	CYTOPLASM
C9JEH3;C9JG97;Q13685	AAMP	C9JEH3;C9JG97;Q13685		Cytosol	CYTOPLASM
C9JEJ2;P49585	PCYT1A	C9JEJ2;P49585		Cytosol	CYTOPLASM
C9JEX3;Q13614;Q13614-2	MTMR2	C9JEX3;Q13614;Q13614-2	ENDOSOME-VESICLE	Cytosol	TRANSLATION
C9JF17;P05090	APOD	C9JF17;P05090		Nucleus	NUCLEUS
C9JFE4;Q13098;Q13098-5;Q13098-7	GPS1	C9JFE4;Q13098;Q13098-5;Q13098-7	PROTEIN-COMPLEX	Protein Complex	PROTEIN-COMPLEX
C9JFR7;P99999	CYCS	C9JFR7;P99999	MITOCHONDRIA	Mitochondria	MITOCHONDRIA
C9JFV4;Q8IZL8	PELP1	C9JFV4;Q8IZL8	NUCLEUS	Nucleus	NUCLEUS
C9JH25;C9JH25-2;C9JH25-3;C9JVX5	PRRT4	C9JH25;C9JH25-2;C9JH25-3;C9JVX5		Cytosol	PEROXISOME
C9JIF9;P13798	APEH	C9JIF9;P13798	PROTEIN-COMPLEX	Cytosol	PROTEIN-COMPLEX
C9JIJ9;Q6XE24-3	RBMS3	C9JIJ9;Q6XE24-3		Endosome	ER
C9JIK8;Q9Y4P1;Q9Y4P1-2;Q9Y4P1-6	ATG4B	C9JIK8;Q9Y4P1;Q9Y4P1-2;Q9Y4P1-6	CYTOPLASM	Cytosol	CYTOPLASM
C9JJ19;P82930	MRPS34	C9JJ19;P82930	MITOCHONDRIA	Mitochondria	MITOCHONDRIA
C9JJN9;Q8N3P4;Q8N3P4-3	VPS8	C9JJN9;Q8N3P4;Q8N3P4-3		Cytosol	PROTEIN-COMPLEX
C9JJU7;Q9NSI2;Q9NSI2-2	FAM207A	C9JJU7;Q9NSI2;Q9NSI2-2			nan
C9JJV1;Q9Y5U2;Q9Y5U2-2	TSSC4	C9JJV1;Q9Y5U2;Q9Y5U2-2		Protein Complex	CYTOPLASM
C9JKA9;Q9NS87;Q9NS87-2;Q9NS87-3	KIF15	C9JKA9;Q9NS87;Q9NS87-2;Q9NS87-3			CYTOPLASM
C9JKI3	CAV1	C9JKI3			nan
C9JKL2;C9JPX5;O95772	STARD3NL	C9JKL2;C9JPX5;O95772		PM	LYSOSOME
C9JLB7;Q96HP4;U3KQU8	OXNAD1	C9JLB7;Q96HP4;U3KQU8	MITOCHONDRIA		MITOCHONDRIA
C9JLU1;P52434	POLR2H	C9JLU1;P52434	NUCLEUS	Cytosol	NUCLEUS
C9JLW8;I3L2L5;I3L4Q0	MCRIP1	C9JLW8;I3L2L5;I3L4Q0		Cytosol	CYTOPLASM
C9JME2;Q9Y4F1;Q9Y4F1-2	FARP1	C9JME2;Q9Y4F1;Q9Y4F1-2		PM	CYTOPLASM
C9JMP5;C9JT95;F8WAF5;H7C0W4;Q96AH0;Q96AH0-2;Q96AH0-3;Q9BQ15	NABP2;NABP2;NABP1;NABP1;NABP1;NABP1;NABP1;NABP2	C9JMP5;C9JT95;F8WAF5;H7C0W4;Q96AH0;Q96AH0-2;Q96AH0-3;Q9BQ15		Nucleus	LD
C9JNE2;Q9Y530	OARD1	C9JNE2;Q9Y530		Translation	NUCLEUS
C9JNG9	COL6A3	C9JNG9			ENDOSOME-VESICLE
C9JP85;Q16656;Q16656-2;Q16656-4	NRF1	C9JP85;Q16656;Q16656-2;Q16656-4			NUCLEUS
C9JQ41;H7C525;Q4VC31	CCDC58	C9JQ41;H7C525;Q4VC31	MITOCHONDRIA	Mitochondria	MITOCHONDRIA
C9JQD4;O43447	PPIH	C9JQD4;O43447		Protein Complex	CYTOPLASM
C9JQV0;H7C0T1;H7C2R9;Q9BRJ6	C7orf50	C9JQV0;H7C0T1;H7C2R9;Q9BRJ6			TRANSLATION
C9JRL4	MDH1	C9JRL4	CYTOPLASM		PROTEIN-COMPLEX
C9JRZ6	CHCHD3	C9JRZ6	MITOCHONDRIA	Mitochondria	MITOCHONDRIA
C9JRZ8;C9JRZ8-2;O60218	AKR1B15;AKR1B15;AKR1B10	C9JRZ8;C9JRZ8-2;O60218	CYTOPLASM	Cytosol	CYTOPLASM
C9JSG8;O15503;O15503-2	INSIG1	C9JSG8;O15503;O15503-2	ER	Endosome	ER
C9JWJ8;Q14938-3;Q14938-5	NFIX	C9JWJ8;Q14938-3;Q14938-5	NUCLEUS		TRANSLATION
C9JWV4;G5E9Q8;Q9H9Q4;Q9H9Q4-2	NHEJ1	C9JWV4;G5E9Q8;Q9H9Q4;Q9H9Q4-2		Cytosol	PROTEIN-COMPLEX
C9JYM0;O75817	POP7	C9JYM0;O75817	NUCLEUS	PM	LYSOSOME
C9JYQ9;H0Y8C2;Q6P5R6	RPL22L1	C9JYQ9;H0Y8C2;Q6P5R6	TRANSLATION	Translation	TRANSLATION
C9JYS5;J3KS67;J3QL47;J3QL63;K7ENL4;Q96ET8-3;Q9NYZ1	TVP23C;TVP23B;TVP23C;TVP23B;TVP23B;TVP23C;TVP23B	C9JYS5;J3KS67;J3QL47;J3QL63;K7ENL4;Q96ET8-3;Q9NYZ1		Endosome	ENDOSOME-VESICLE
C9JYY6;Q92823;Q92823-3;Q92823-4;Q92823-6	NRCAM	C9JYY6;Q92823;Q92823-3;Q92823-4;Q92823-6		PM	CYTOPLASM
C9JZG9;C9JZY6;P62256	UBE2H	C9JZG9;C9JZY6;P62256		Cytosol	CYTOPLASM
C9JZI7	NAP1L4	C9JZI7		Cytosol	CYTOPLASM
C9JZR2;O60716;O60716-2;O60716-3;O60716-5	CTNND1	C9JZR2;O60716;O60716-2;O60716-3;O60716-5	PM	PM	PM
D3DPN2;O75056	SDC3	D3DPN2;O75056		PM	GOLGI APPARATUS
D3DQV9;P78344	EIF4G2	D3DQV9;P78344		Endosome	ENDOSOME-VESICLE
D3DWX8;P98173;P98173-2;P98173-3;Q5HY75	FAM3A	D3DWX8;P98173;P98173-2;P98173-3;Q5HY75	GOLGI APPARATUS	Cytosol	GOLGI APPARATUS
D3YTA9;F6U1T9;P63098	PPP3R1	D3YTA9;F6U1T9;P63098		Cytosol	CYTOPLASM
D3YTB5;P51617;P51617-2;P51617-3;P51617-4	IRAK1	D3YTB5;P51617;P51617-2;P51617-3;P51617-4	CYTOPLASM	Cytosol	PROTEIN-COMPLEX
D3YTC7;Q9UBM1;Q9UBM1-2;Q9UBM1-3	PEMT	D3YTC7;Q9UBM1;Q9UBM1-2;Q9UBM1-3		Golgi	LD
D4PHA4;Q86WP2;Q86WP2-2;Q86WP2-3	GPBP1	D4PHA4;Q86WP2;Q86WP2-2;Q86WP2-3			NUCLEUS
D5H3J5;Q2L6G2	HLA-B	D5H3J5;Q2L6G2	PM		GOLGI APPARATUS
D6R927;Q06330;Q06330-4;Q06330-5;Q06330-6;Q06330-7	RBPJ	D6R927;Q06330;Q06330-4;Q06330-5;Q06330-6;Q06330-7	NUCLEUS	Nucleus	TRANSLATION
D6R938;Q13557;Q13557-10;Q13557-11;Q13557-12;Q13557-6;Q13557-8	CAMK2D	D6R938;Q13557;Q13557-10;Q13557-11;Q13557-12;Q13557-6;Q13557-8	PROTEIN-COMPLEX	Protein Complex	PROTEIN-COMPLEX
D6R9B6	RPS3A	D6R9B6	TRANSLATION		TRANSLATION
D6R9C3;H0UI06;P14406	COX7A2	D6R9C3;H0UI06;P14406		Mitochondria	MITOCHONDRIA
D6R9Q7;E7ESU6;Q8NBW4;Q8NBW4-2	SLC38A9	D6R9Q7;E7ESU6;Q8NBW4;Q8NBW4-2	LYSOSOME		LYSOSOME
D6R9U3;D6RDB1;D6RGZ0;Q96QK8	SMIM14	D6R9U3;D6RDB1;D6RGZ0;Q96QK8		Cytosol	nan
D6RA57;D6RC31;D6RE67;H0Y9X1;Q96EY4	TMA16	D6RA57;D6RC31;D6RE67;H0Y9X1;Q96EY4			CYTOPLASM
D6RA82;P12429	ANXA3	D6RA82;P12429		Cytosol	CYTOPLASM
D6RAJ6;Q9UKT5;Q9UKT5-2	FBXO4	D6RAJ6;Q9UKT5;Q9UKT5-2		Cytosol	LD
D6RAN8;Q9P0M9	MRPL27	D6RAN8;Q9P0M9	MITOCHONDRIA	Mitochondria	MITOCHONDRIA
D6RB12;Q9BUD6	SPON2	D6RB12;Q9BUD6			LD
D6RB73;D6RE58;D6RHG0;P78383;P78383-2	SLC35B1	D6RB73;D6RE58;D6RHG0;P78383;P78383-2			GOLGI APPARATUS
D6RB81;Q9UHK6;Q9UHK6-2;Q9UHK6-4;Q9UHK6-5;V9GYP4;V9GYU9;V9GZ45	AMACR	D6RB81;Q9UHK6;Q9UHK6-2;Q9UHK6-4;Q9UHK6-5;V9GYP4;V9GYU9;V9GZ45	PEROXISOME		PEROXISOME
D6RBN4;P36406;P36406-2;P36406-3	TRIM23	D6RBN4;P36406;P36406-2;P36406-3			LD
D6RBY0;D6RJG8;Q8TAC1;Q8TAC1-2	RFESD	D6RBY0;D6RJG8;Q8TAC1;Q8TAC1-2			CYTOPLASM
D6RC81	PARP8	D6RC81			CYTOPLASM
D6RCC7;Q9P2D6;Q9P2D6-2;Q9P2D6-3;Q9P2D6-4	FAM135A	D6RCC7;Q9P2D6;Q9P2D6-2;Q9P2D6-3;Q9P2D6-4			GOLGI APPARATUS
D6RCD0;Q8NBQ5	HSD17B11	D6RCD0;Q8NBQ5	LD	PM	LD
D6RCM2;H0YAG5;Q9Y3D5	MRPS18C	D6RCM2;H0YAG5;Q9Y3D5	MITOCHONDRIA	Mitochondria	MITOCHONDRIA
D6RCP5;Q8N264;Q8N264-2;Q8N264-3	ARHGAP24	D6RCP5;Q8N264;Q8N264-2;Q8N264-3			MITOCHONDRIA
D6RCU0;Q9H5J4	ELOVL6	D6RCU0;Q9H5J4		ER	ER
D6RD26;D6RIS3;D6RIT3;Q8N1A6	C4orf33	D6RD26;D6RIS3;D6RIT3;Q8N1A6		Cytosol	CYTOPLASM
D6RDW7;H0Y8H1;Q9UKJ5	CHIC2	D6RDW7;H0Y8H1;Q9UKJ5			ENDOSOME-VESICLE
D6REA0;O75879	GATB	D6REA0;O75879	MITOCHONDRIA	Mitochondria	MITOCHONDRIA
D6REK3;Q6UX04;Q6UX04-2	CWC27	D6REK3;Q6UX04;Q6UX04-2			CYTOPLASM
D6REQ6;D6RHI9;O00584	RNASET2	D6REQ6;D6RHI9;O00584	LYSOSOME	Lysosome	LYSOSOME
D6RER5;D6RGI3;Q9NVA2	SEPTIN11	D6RER5;D6RGI3;Q9NVA2	CYTOPLASM	Cytosol	CYTOPLASM
D6REX3	SEC31A	D6REX3	ENDOSOME-VESICLE	Protein Complex	PROTEIN-COMPLEX
D6REY2;P23508;P23508-2	MCC	D6REY2;P23508;P23508-2		Protein Complex	PROTEIN-COMPLEX
D6RF23	RACK1	D6RF23	TRANSLATION		NUCLEUS
D6RF48;Q9P2W9	STX18	D6RF48;Q9P2W9		ER	PROTEIN-COMPLEX
D6RFG8;P27707	DCK	D6RFG8;P27707		Cytosol	CYTOPLASM
D6RG30;Q2TB18;Q2TB18-2	ASTE1	D6RG30;Q2TB18;Q2TB18-2			NUCLEUS
D6RGG3;Q99715	COL12A1	D6RGG3;Q99715		Lysosome	PROTEIN-COMPLEX
D6RGK3;D6RHW1;D6RIE8;D6RIV9;D6RIY1;Q16594;Q9HBM6	TAF9;TAF9;TAF9;TAF9;TAF9;TAF9;TAF9B	D6RGK3;D6RHW1;D6RIE8;D6RIV9;D6RIY1;Q16594;Q9HBM6		Nucleus	NUCLEUS
D6RH26;Q5HY62;Q8TE69;Q8TE69-2;Q96DE9;S4R3G8	EOLA1;EOLA2;EOLA1;EOLA1;EOLA2;EOLA2	D6RH26;Q5HY62;Q8TE69;Q8TE69-2;Q96DE9;S4R3G8			MITOCHONDRIA
D6RHD2;O43609	SPRY1	D6RHD2;O43609	GOLGI APPARATUS	Endosome	ENDOSOME-VESICLE
D6RHX8;P43250;P43250-2;P43250-3	GRK6	D6RHX8;P43250;P43250-2;P43250-3		ER	ENDOSOME-VESICLE
D6RIG4;Q9HCL0;Q9HCL0-2	PCDH18	D6RIG4;Q9HCL0;Q9HCL0-2		PM	PM
D6RJ07;Q9UL40	ZNF346	D6RJ07;Q9UL40		Translation	TRANSLATION
D6RJ90;Q9Y6G5	COMMD10	D6RJ90;Q9Y6G5		Cytosol	CYTOPLASM
E0CX11	STMP1	E0CX11			LD
E2QRB3;P32322;P32322-3	PYCR1	E2QRB3;P32322;P32322-3	MITOCHONDRIA	Mitochondria	MITOCHONDRIA
E5RFF3;H0YAV4;Q9UHF7;Q9UHF7-2;Q9UHF7-3	TRPS1	E5RFF3;H0YAV4;Q9UHF7;Q9UHF7-2;Q9UHF7-3			NUCLEUS
E5RFH6;E5RFU2;P34913	EPHX2	E5RFH6;E5RFU2;P34913	CYTOPLASM		CYTOPLASM
E5RFX4;Q96KB5;Q96KB5-2	PBK	E5RFX4;Q96KB5;Q96KB5-2			NUCLEUS
E5RG17;Q6P1N9	TATDN1	E5RG17;Q6P1N9		Cytosol	CYTOPLASM
E5RG29	ASPH	E5RG29	ER	ER	ER
E5RG44;E5RGJ1;E5RIT1;Q629K1	TRIQK	E5RG44;E5RGJ1;E5RIT1;Q629K1	ER	ER	ER
E5RGR0;O75608;O75608-2	LYPLA1	E5RGR0;O75608;O75608-2	CYTOPLASM	Cytosol	CYTOPLASM
E5RGS2;Q9H6H4	REEP4	E5RGS2;Q9H6H4		ER	ER
E5RGZ2;H0YKJ1;Q6NT76;Q6NT76-2;Q6NT76-3;Q6NT76-5	HMBOX1	E5RGZ2;H0YKJ1;Q6NT76;Q6NT76-2;Q6NT76-3;Q6NT76-5			NUCLEUS
E5RHG8;Q15369	ELOC	E5RHG8;Q15369		Cytosol	CYTOPLASM
E5RHG9	UQCRB	E5RHG9	MITOCHONDRIA		MITOCHONDRIA
E5RHJ2	ASPH	E5RHJ2	ER		LD
E5RHN3;Q8TDQ0	HAVCR2	E5RHN3;Q8TDQ0			ENDOSOME-VESICLE
E5RIA9;H0YAN3;Q9UJ68;Q9UJ68-2;Q9UJ68-3;Q9UJ68-4;Q9UJ68-5	MSRA	E5RIA9;H0YAN3;Q9UJ68;Q9UJ68-2;Q9UJ68-3;Q9UJ68-4;Q9UJ68-5	CYTOPLASM	Cytosol	CYTOPLASM
E5RIH5;Q6NXR4	TTI2	E5RIH5;Q6NXR4			TRANSLATION
E5RIK9;Q96E29;Q96E29-2;Q96E29-3	MTERF3	E5RIK9;Q96E29;Q96E29-2;Q96E29-3		Mitochondria	MITOCHONDRIA
E5RIQ5;Q9BX73;Q9BX73-2	TM2D2	E5RIQ5;Q9BX73;Q9BX73-2		ER	LYSOSOME
E5RIW3;E5RJD8;O75347	TBCA	E5RIW3;E5RJD8;O75347		Cytosol	CYTOPLASM
E5RIW9;P28328	PEX2	E5RIW9;P28328			MITOCHONDRIA
E5RJ29;Q9NYI0;Q9NYI0-2	PSD3	E5RJ29;Q9NYI0;Q9NYI0-2			LD
E5RK69	ANXA6	E5RK69	CYTOPLASM	PM	CYTOPLASM
E7EM57	G6PD	E7EM57	CYTOPLASM		PROTEIN-COMPLEX
E7EM64;Q7L5N1	COPS6	E7EM64;Q7L5N1	PROTEIN-COMPLEX	Protein Complex	PROTEIN-COMPLEX
E7EMN6	PPP1R2	E7EMN6		Cytosol	CYTOPLASM
E7EMP6;Q96FZ2	HMCES	E7EMP6;Q96FZ2		Cytosol	CYTOPLASM
E7EMS2;G3V3D1;G3V3E8;J3KMY5;P61916	NPC2	E7EMS2;G3V3D1;G3V3E8;J3KMY5;P61916	LYSOSOME	ER	LYSOSOME
E7EMZ9;E9PBC6;O95359;O95359-3	TACC2	E7EMZ9;E9PBC6;O95359;O95359-3	CYTOPLASM	Cytosol	CYTOPLASM
E7EN19;O95819-6	MAP4K4	E7EN19;O95819-6		Protein Complex	TRANSLATION
E7EN65;E7ENM0;G3V0G6;P15502;P15502-1;P15502-10;P15502-12;P15502-13;P15502-2;P15502-4;P15502-5;P15502-6;P15502-7;P15502-9	ELN	E7EN65;E7ENM0;G3V0G6;P15502;P15502-1;P15502-10;P15502-12;P15502-13;P15502-2;P15502-4;P15502-5;P15502-6;P15502-7;P15502-9			LD
E7EN73;Q8IZA0;Q8IZA0-2	KIAA0319L	E7EN73;Q8IZA0;Q8IZA0-2	GOLGI APPARATUS	Golgi	ENDOSOME-VESICLE
E7ENY0;P35611-3;P35611-6	ADD1	E7ENY0;P35611-3;P35611-6		Protein Complex	TRANSLATION
E7EP72;Q9UFG5	C19orf25	E7EP72;Q9UFG5		Endosome	LD
E7EPI0;Q9P2D0	IBTK	E7EPI0;Q9P2D0		Golgi	TRANSLATION
E7EPK1;E7ES33;Q16181;Q16181-2	SEPTIN7	E7EPK1;E7ES33;Q16181;Q16181-2		Cytosol	CYTOPLASM
E7EPN9;Q9Y520;Q9Y520-4;Q9Y520-5;Q9Y520-6;Q9Y520-7	PRRC2C	E7EPN9;Q9Y520;Q9Y520-4;Q9Y520-5;Q9Y520-6;Q9Y520-7		Endosome	ER
E7EPP7;Q6ZWJ1	STXBP4	E7EPP7;Q6ZWJ1			LD
E7EPS8;P28827;P28827-2	PTPRM	E7EPS8;P28827;P28827-2		PM	ER
E7EPT4;P19404	NDUFV2	E7EPT4;P19404	MITOCHONDRIA	Mitochondria	MITOCHONDRIA
E7EPX0;E7EVJ4;Q9NUL3;Q9NUL3-2;Q9NUL3-3;Q9NUL3-7;Q9NUL3-8	STAU2	E7EPX0;E7EVJ4;Q9NUL3;Q9NUL3-2;Q9NUL3-3;Q9NUL3-7;Q9NUL3-8		Translation	TRANSLATION
E7EQ45;Q9H0R1	AP5M1	E7EQ45;Q9H0R1			LD
E7EQ69;Q9GZZ1	NAA50	E7EQ69;Q9GZZ1		Cytosol	CYTOPLASM
E7EQR4;P15311	EZR	E7EQR4;P15311		Cytosol	CYTOPLASM
E7EQR8;Q9GZM5	YIPF3	E7EQR8;Q9GZM5	GOLGI APPARATUS	Golgi	GOLGI APPARATUS
E7EQT4;Q9UKV3;S4R3H4	ACIN1	E7EQT4;Q9UKV3;S4R3H4		Nucleus	NUCLEUS
E7EQU1;E7ES08;E9PES6;O15347	HMGB3	E7EQU1;E7ES08;E9PES6;O15347	PROTEIN-COMPLEX	Cytosol	CYTOPLASM
E7EQY1;Q96C01	FAM136A	E7EQY1;Q96C01	MITOCHONDRIA	Mitochondria	MITOCHONDRIA
E7ER77;Q7Z2K6	ERMP1	E7ER77;Q7Z2K6	ER	PM	ER
E7ER86;E7ESA3;Q8WW35	TCTEX1D2;ENSG00000272741;DYNLT2B	E7ER86;E7ESA3;Q8WW35			TRANSLATION
E7ERI8;E7EW49;O75122-3	CLASP2	E7ERI8;E7EW49;O75122-3		Endosome	CYTOPLASM
E7ERK9;Q9UI10;Q9UI10-2;Q9UI10-3	EIF2B4	E7ERK9;Q9UI10;Q9UI10-2;Q9UI10-3	TRANSLATION	Translation	TRANSLATION
E7ERS3;Q86VM9	ZC3H18	E7ERS3;Q86VM9		Nucleus	NUCLEUS
E7ERZ2;F8WDV1;Q9Y535;Q9Y535-2	POLR3H	E7ERZ2;F8WDV1;Q9Y535;Q9Y535-2		Nucleus	NUCLEUS
E7ES19;P35443	THBS4	E7ES19;P35443			LD
E7ES52;P46527	CDKN1B	E7ES52;P46527			CYTOPLASM
E7ES96;P49768;P49768-2	PSEN1	E7ES96;P49768;P49768-2	GOLGI APPARATUS	PM	ER
E7ESA6;H0YBP1;Q05397;Q05397-7	PTK2	E7ESA6;H0YBP1;Q05397;Q05397-7		Cytosol	CYTOPLASM
E7ESC6;Q9UIA9	XPO7	E7ESC6;Q9UIA9	PROTEIN-COMPLEX	Cytosol	PROTEIN-COMPLEX
E7ESK6;E9PBI9;P34741	SDC2	E7ESK6;E9PBI9;P34741	PM	PM	ER
E7ESL0;J3KQY1;Q9NWU5	MRPL22	E7ESL0;J3KQY1;Q9NWU5	MITOCHONDRIA	Mitochondria	MITOCHONDRIA
E7ESP9;P07197	NEFM	E7ESP9;P07197			PROTEIN-COMPLEX
E7ESS3;K7EKW3;Q71RG4;Q71RG4-2	TMUB2	E7ESS3;K7EKW3;Q71RG4;Q71RG4-2		ER	ER
E7ESU0	USP19	E7ESU0		Cytosol	CYTOPLASM
E7ESY4;Q13330;Q13330-3	MTA1	E7ESY4;Q13330;Q13330-3		Nucleus	LD
E7ET40;P00749;P00749-2	PLAU	E7ET40;P00749;P00749-2			PROTEIN-COMPLEX
E7ET49;Q8NCG7	DAGLB	E7ET49;Q8NCG7		Translation	TRANSLATION
E7ETE2;P12081;P12081-4	HARS1	E7ETE2;P12081;P12081-4	CYTOPLASM	Cytosol	CYTOPLASM
E7ETP9;Q9UQV4	LAMP3	E7ETP9;Q9UQV4			NUCLEUS
E7ETU5;F6Y5H0;P29558;P29558-2	RBMS1	E7ETU5;F6Y5H0;P29558;P29558-2		Endosome	ER
E7ETU7;H0Y9G6;P09001	MRPL3	E7ETU7;H0Y9G6;P09001	MITOCHONDRIA	Mitochondria	MITOCHONDRIA
E7ETU9	PLOD2	E7ETU9	ER		ER
E7ETZ4;Q9Y6E2	BZW2	E7ETZ4;Q9Y6E2		Cytosol	PROTEIN-COMPLEX
E7EU05;P16671;P16671-3	CD36	E7EU05;P16671;P16671-3	PM	PM	ER
E7EUA0	NEXN	E7EUA0			TRANSLATION
E7EUF1;Q13822;Q13822-2;Q13822-3	ENPP2	E7EUF1;Q13822;Q13822-2;Q13822-3			LD
E7EUN9;Q9NX74	DUS2	E7EUN9;Q9NX74	CYTOPLASM		CYTOPLASM
E7EUU4;Q04637-8	EIF4G1	E7EUU4;Q04637-8	TRANSLATION	Protein Complex	TRANSLATION
E7EV01;O15484	CAPN5	E7EV01;O15484		PM	ER
E7EVA0	MAP4	E7EVA0		Translation	TRANSLATION
E7EVB6;O60941;O60941-6;O60941-7	DTNB	E7EVB6;O60941;O60941-6;O60941-7		Peroxisome	NUCLEUS
E7EVC7;Q676U5;Q676U5-2	ATG16L1	E7EVC7;Q676U5;Q676U5-2		Cytosol	PM
E7EVQ6;Q14534	SQLE	E7EVQ6;Q14534	ER	ER	ER
E7EVW7;P14317	HCLS1	E7EVW7;P14317	CYTOPLASM		CYTOPLASM
E7EVX8;Q8WWY3	PRPF31	E7EVX8;Q8WWY3	NUCLEUS	Nucleus	NUCLEUS
E7EVZ1;Q86UP3;Q86UP3-2;Q86UP3-4;Q86UP3-5	ZFHX4	E7EVZ1;Q86UP3;Q86UP3-2;Q86UP3-4;Q86UP3-5		Protein Complex	GOLGI APPARATUS
E7EVZ5;Q8NBM8	PCYOX1L	E7EVZ5;Q8NBM8		ER	ER
E7EW84;Q8TAG9;Q8TAG9-2	EXOC6	E7EW84;Q8TAG9;Q8TAG9-2			PROTEIN-COMPLEX
E7EWD6;Q76L83	ASXL2	E7EWD6;Q76L83			NUCLEUS
E7EWM1;Q15596	NCOA2	E7EWM1;Q15596		Nucleus	NUCLEUS
E7EWP0;H0Y886;O43674;O43674-2	NDUFB5	E7EWP0;H0Y886;O43674;O43674-2		Mitochondria	PEROXISOME
E7EWR4;P33240;P33240-2	CSTF2	E7EWR4;P33240;P33240-2	NUCLEUS	Cytosol	CYTOPLASM
E7EX17;P23588	EIF4B	E7EX17;P23588		Translation	CYTOPLASM
E7EX44;Q05682-3	CALD1	E7EX44;Q05682-3			CYTOPLASM
E7EX59;E9PDR0;P05166;P05166-2	PCCB	E7EX59;E9PDR0;P05166;P05166-2	MITOCHONDRIA	Mitochondria	MITOCHONDRIA
E7EX90;Q14203-3	DCTN1	E7EX90;Q14203-3	PROTEIN-COMPLEX	Protein Complex	PROTEIN-COMPLEX
E9PAV3	NACA	E9PAV3	TRANSLATION	Translation	ENDOSOME-VESICLE
E9PB61;Q86V81	ALYREF	E9PB61;Q86V81	NUCLEUS	Nucleus	NUCLEUS
E9PBC1;F6PQP6;O95208;O95208-2	EPN2	E9PBC1;F6PQP6;O95208;O95208-2		PM	NUCLEUS
E9PBZ2;P15428;P15428-2;P15428-4	HPGD	E9PBZ2;P15428;P15428-2;P15428-4	CYTOPLASM		CYTOPLASM
E9PC47;P53667;P53667-2;P53667-4	LIMK1	E9PC47;P53667;P53667-2;P53667-4
E9PC49;Q96EB6	SIRT1	E9PC49;Q96EB6		Cytosol	NUCLEUS
E9PC66;P17029	ZKSCAN1	E9PC66;P17029	NUCLEUS		NUCLEUS
E9PC69;Q7KZI7;Q7KZI7-11;Q7KZI7-15;Q7KZI7-16;Q7KZI7-4;Q7KZI7-5;Q7KZI7-8;Q7KZI7-9	MARK2	E9PC69;Q7KZI7;Q7KZI7-11;Q7KZI7-15;Q7KZI7-16;Q7KZI7-4;Q7KZI7-5;Q7KZI7-8;Q7KZI7-9		Cytosol	LD
E9PCG9;Q02338	BDH1	E9PCG9;Q02338	MITOCHONDRIA	Mitochondria	MITOCHONDRIA
E9PCP0;F5H0S8;F5H100;F5H8J8;P16520;P16520-2	GNB3	E9PCP0;F5H0S8;F5H100;F5H8J8;P16520;P16520-2			ER
E9PCQ7;F8WD67;F8WD87;O43709;O43709-2;O43709-3	BUD23	E9PCQ7;F8WD67;F8WD87;O43709;O43709-2;O43709-3			PROTEIN-COMPLEX
E9PCT3;P51636	CAV2	E9PCT3;P51636		PM	ER
E9PCW1;G5E9T8;O95249	GOSR1	E9PCW1;G5E9T8;O95249	GOLGI APPARATUS	Golgi	GOLGI APPARATUS
E9PD53;Q9NTJ3	SMC4	E9PD53;Q9NTJ3			NUCLEUS
E9PE17;I3L0E3;Q9Y2R5	MRPS17;ENSG00000249773;MRPS17	E9PE17;I3L0E3;Q9Y2R5		Mitochondria	MITOCHONDRIA
E9PEB5;Q96AE4	FUBP1	E9PEB5;Q96AE4		Cytosol	CYTOPLASM
E9PEJ6;P98196	ATP11A	E9PEJ6;P98196		Endosome	ENDOSOME-VESICLE
E9PER6;O15530;O15530-2;O15530-3	PDPK1	E9PER6;O15530;O15530-2;O15530-3		Cytosol	CYTOPLASM
E9PEX6;P09622	DLD	E9PEX6;P09622	MITOCHONDRIA	Mitochondria	MITOCHONDRIA
E9PEZ1;Q8IWT3;Q8IWT3-3	CUL9	E9PEZ1;Q8IWT3;Q8IWT3-3			LD
E9PF19;Q96E41;Q9Y4P3	TBL2	E9PF19;Q96E41;Q9Y4P3		PM	ER
E9PFF5	FXR1	E9PFF5			ER
E9PFK5;P78316;P78316-2	NOP14	E9PFK5;P78316;P78316-2			NUCLEUS
E9PFK9;Q9UJ41;Q9UJ41-3;Q9UJ41-4	RABGEF1	E9PFK9;Q9UJ41;Q9UJ41-3;Q9UJ41-4		Cytosol	CYTOPLASM
E9PFR3;Q14738	PPP2R5D	E9PFR3;Q14738	CYTOPLASM	Cytosol	CYTOPLASM
E9PG19;O94868;O94868-2;O94868-3	FCHSD2	E9PG19;O94868;O94868-2;O94868-3			CYTOPLASM
E9PG22;Q8IW35	CEP97	E9PG22;Q8IW35			PROTEIN-COMPLEX
E9PGA6;Q9BXJ4;Q9BXJ4-3	C1QTNF3-AMACR;C1QTNF3;C1QTNF3	E9PGA6;Q9BXJ4;Q9BXJ4-3			GOLGI APPARATUS
E9PGC0;P20936;P20936-2;P20936-4	RASA1	E9PGC0;P20936;P20936-2;P20936-4		Cytosol	CYTOPLASM
E9PGC8	MAP1A	E9PGC8		Translation	TRANSLATION
E9PGQ0;Q96H78	SLC25A44	E9PGQ0;Q96H78	MITOCHONDRIA	Mitochondria	PEROXISOME
E9PGT1;Q15631	TSN	E9PGT1;Q15631		Cytosol	CYTOPLASM
E9PGT6;Q99627	COPS8	E9PGT6;Q99627		Protein Complex	CYTOPLASM
E9PHH9;Q9BUI4	POLR3C	E9PHH9;Q9BUI4		Nucleus	NUCLEUS
E9PHR9;Q9NRQ2;Q9NRQ2-2	PLSCR4	E9PHR9;Q9NRQ2;Q9NRQ2-2		ER	GOLGI APPARATUS
E9PHV5;P28290	ITPRID2	E9PHV5;P28290	PM	ER	ER
E9PHY8;Q8NDA8	MROH1	E9PHY8;Q8NDA8		Cytosol	LD
E9PI41;Q9NPD3	EXOSC4	E9PI41;Q9NPD3	NUCLEUS	Nucleus	NUCLEUS
E9PI99;Q13952;Q13952-2;Q13952-3;Q13952-5;Q13952-6;Q13952-7;Q5T6K5;Q5T6K7	NFYC	E9PI99;Q13952;Q13952-2;Q13952-3;Q13952-5;Q13952-6;Q13952-7;Q5T6K5;Q5T6K7			PROTEIN-COMPLEX
E9PIC2;E9PJV6;P56962	STX17	E9PIC2;E9PJV6;P56962		ER	ER
E9PIG5;O00212	RHOD	E9PIG5;O00212			LD
E9PIK4;E9PIN5;E9PKN9;E9PKZ4;E9PMW4;E9PN66;E9PPM1;E9PQ46;E9PS55;O14683;U3KQ32	TP53I11	E9PIK4;E9PIN5;E9PKN9;E9PKZ4;E9PMW4;E9PN66;E9PPM1;E9PQ46;E9PS55;O14683;U3KQ32			nan
E9PIM0;J3KN20;Q9NS37	CREBZF	E9PIM0;J3KN20;Q9NS37		Cytosol	CYTOPLASM
E9PIM6;E9PNQ8;P04216	THY1	E9PIM6;E9PNQ8;P04216		PM	LD
E9PJ55;Q9NUJ3	TCP11L1	E9PJ55;Q9NUJ3	PROTEIN-COMPLEX	Cytosol	PROTEIN-COMPLEX
E9PJD7;Q6ZMK1;Q6ZMK1-2	CYHR1	E9PJD7;Q6ZMK1;Q6ZMK1-2			NUCLEUS
E9PJJ5;E9PRT1;Q4G0X4	KCTD21	E9PJJ5;E9PRT1;Q4G0X4		Protein Complex	CYTOPLASM
E9PJM3;Q9UK99;Q9UK99-2;Q9UK99-3	FBXO3	E9PJM3;Q9UK99;Q9UK99-2;Q9UK99-3			CYTOPLASM
E9PJN9	RPS3	E9PJN9	TRANSLATION	Golgi	TRANSLATION
E9PJQ3;E9PK53;Q8N413;Q8N413-4	SLC25A45	E9PJQ3;E9PK53;Q8N413;Q8N413-4			MITOCHONDRIA
E9PK67;E9PNI7;Q53GL7	PARP10	E9PK67;E9PNI7;Q53GL7		Cytosol	CYTOPLASM
E9PK89;Q8TBN0;Q8TBN0-2	RAB3IL1	E9PK89;Q8TBN0;Q8TBN0-2		Cytosol	CYTOPLASM
E9PKB7;H0YE88;P28347	TEAD1	E9PKB7;H0YE88;P28347		Nucleus	NUCLEUS
E9PKE9;G3V148;Q9H920;Q9H920-2	RNF121	E9PKE9;G3V148;Q9H920;Q9H920-2		ER	LD
E9PKF6;H7BXH2;Q5H9R7;Q5H9R7-2;Q5H9R7-6	PPP6R3	E9PKF6;H7BXH2;Q5H9R7;Q5H9R7-2;Q5H9R7-6	CYTOPLASM	Cytosol	CYTOPLASM
E9PKG1;Q99873;Q99873-2;Q99873-3	PRMT1	E9PKG1;Q99873;Q99873-2;Q99873-3		Cytosol	CYTOPLASM
E9PKP7;P17480;P17480-2	UBTF	E9PKP7;P17480;P17480-2	NUCLEUS	Nucleus	NUCLEUS
E9PKT4;Q8N131;Q8N131-2	TMEM123	E9PKT4;Q8N131;Q8N131-2			ENDOSOME-VESICLE
E9PKU7	GANAB	E9PKU7	ER		NUCLEUS
E9PKW1;Q9NS15;Q9NS15-2	LTBP3	E9PKW1;Q9NS15;Q9NS15-2		ER	PEROXISOME
E9PL17;Q92989;Q92989-2	CLP1	E9PL17;Q92989;Q92989-2	NUCLEUS		NUCLEUS
E9PL57	NEDD8-MDP1	E9PL57		Cytosol	CYTOPLASM
E9PL83;E9PQE6;P35318	ADM	E9PL83;E9PQE6;P35318			LD
E9PLI6;E9PS76;Q8N9N8	EIF1AD	E9PLI6;E9PS76;Q8N9N8		Cytosol	CYTOPLASM
E9PLK3;P55786	NPEPPS	E9PLK3;P55786	CYTOPLASM	Cytosol	CYTOPLASM
E9PLM6;E9PPJ5;P21741	MDK	E9PLM6;E9PPJ5;P21741			LD
E9PLN8;F8W9H0;I3L3B4;Q9BQB6;Q9BQB6-2;Q9BQB6-3	ENSG00000255439;VKORC1;ENSG00000255439;VKORC1;VKORC1;VKORC1	E9PLN8;F8W9H0;I3L3B4;Q9BQB6;Q9BQB6-2;Q9BQB6-3			MITOCHONDRIA
E9PLP8;Q12996	CSTF3	E9PLP8;Q12996		Nucleus	NUCLEUS
E9PM75;Q9NTG7	SIRT3	E9PM75;Q9NTG7	MITOCHONDRIA	Mitochondria	MITOCHONDRIA
E9PM92;O00193	C11orf58;SMAP	E9PM92;O00193		Cytosol	CYTOPLASM
E9PMB9;Q16798	ME3	E9PMB9;Q16798		Mitochondria	MITOCHONDRIA
E9PMG1;H0YDT0;Q96D71;Q96D71-2;Q96D71-3;Q96D71-4	REPS1	E9PMG1;H0YDT0;Q96D71;Q96D71-2;Q96D71-3;Q96D71-4		Protein Complex	PROTEIN-COMPLEX
E9PMI6;J3KN38;P54105	CLNS1A	E9PMI6;J3KN38;P54105	PROTEIN-COMPLEX	Cytosol	CYTOPLASM
E9PMJ2;J3KP39;Q9BPY3	FAM118B	E9PMJ2;J3KP39;Q9BPY3		Cytosol	CYTOPLASM
E9PMK4;F5H6J2;Q9BQE6-2	LBHD1	E9PMK4;F5H6J2;Q9BQE6-2			CYTOPLASM
E9PMR4;K4DIA7;P48509	CD151	E9PMR4;K4DIA7;P48509	PM	PM	ER
E9PMS6	LMO7	E9PMS6			ENDOSOME-VESICLE
E9PN58	SIRT3	E9PN58	MITOCHONDRIA		MITOCHONDRIA
E9PN81;Q8TDP1	RNASEH2C	E9PN81;Q8TDP1		Cytosol	NUCLEUS
E9PNL8;Q13574;Q13574-1;Q13574-3;Q13574-4;Q13574-5;Q13574-6;Q13574-7	DGKZ	E9PNL8;Q13574;Q13574-1;Q13574-3;Q13574-4;Q13574-5;Q13574-6;Q13574-7		Cytosol	CYTOPLASM
E9PNP3;Q9H7C9	AAMDC	E9PNP3;Q9H7C9		Cytosol	CYTOPLASM
E9PP76;J3KNF4;O14618	CCS	E9PP76;J3KNF4;O14618		Cytosol	CYTOPLASM
E9PP81;E9PPF0;E9PQP8;E9PRA1;H0YCC7;H0YD82;Q17R31;Q17R31-2;Q17R31-3;Q17R31-4;Q17R31-5	TATDN3	E9PP81;E9PPF0;E9PQP8;E9PRA1;H0YCC7;H0YD82;Q17R31;Q17R31-2;Q17R31-3;Q17R31-4;Q17R31-5		Cytosol	CYTOPLASM
E9PPQ1;J3KNE7;Q16890;Q16890-5	TPD52L1	E9PPQ1;J3KNE7;Q16890;Q16890-5	CYTOPLASM		CYTOPLASM
E9PQ91;O75845	SC5D	E9PQ91;O75845			nan
E9PQE8;Q9Y296;Q9Y296-2	TRAPPC4	E9PQE8;Q9Y296;Q9Y296-2		Protein Complex	PROTEIN-COMPLEX
E9PQY2;Q9NQP4	PFDN4	E9PQY2;Q9NQP4		Cytosol	CYTOPLASM
E9PQY3;P11117	ACP2	E9PQY3;P11117	LYSOSOME	ER	LYSOSOME
E9PR30;P62861	FAU	E9PR30;P62861	TRANSLATION	Translation	TRANSLATION
E9PR76;E9PSH4;Q9H063	MAF1	E9PR76;E9PSH4;Q9H063			NUCLEUS
E9PRF4;Q15047;Q15047-3	SETDB1	E9PRF4;Q15047;Q15047-3	NUCLEUS	Nucleus	NUCLEUS
E9PRQ4	NDUFC2-KCTD14	E9PRQ4			nan
E9PRQ7;Q04323	UBXN1	E9PRQ7;Q04323	CYTOPLASM	Cytosol	CYTOPLASM
E9PS00;Q9Y5Q0	FADS3	E9PS00;Q9Y5Q0	ER	ER	ER
E9PS41;Q6RFH5	WDR74	E9PS41;Q6RFH5		Nucleus	NUCLEUS
E9PS74;Q8NBI5;Q8NBI5-2	SLC43A3	E9PS74;Q8NBI5;Q8NBI5-2			CYTOPLASM
E9PSI1	ENSG00000254692	E9PSI1		Cytosol	CYTOPLASM
ENSEMBL:ENSBTAP00000007350	(Bos				LD
ENSEMBL:ENSBTAP00000013050	(Bos				LD
ENSEMBL:ENSBTAP00000016046	(Bos				LD
ENSEMBL:ENSBTAP00000018229	(Bos				LD
ENSEMBL:ENSBTAP00000018574	(Bos				NUCLEUS
ENSEMBL:ENSBTAP00000024146	(Bos				LD
ENSEMBL:ENSBTAP00000025008	(Bos				NUCLEUS
ENSEMBL:ENSBTAP00000032840	(Bos				LD
ENSEMBL:ENSBTAP00000034412	(Bos				MITOCHONDRIA
ENSEMBL:ENSBTAP00000037665	(Bos				LD
F1LLU6;J3QTA2;Q99933;Q99933-2;Q99933-3;Q99933-4	BAG1	F1LLU6;J3QTA2;Q99933;Q99933-2;Q99933-3;Q99933-4		Cytosol	CYTOPLASM
F2Z2E2;Q86VI3	IQGAP3	F2Z2E2;Q86VI3			ENDOSOME-VESICLE
F2Z2U4;H0Y4W2;Q9Y4A5;Q9Y4A5-2	TRRAP	F2Z2U4;H0Y4W2;Q9Y4A5;Q9Y4A5-2			NUCLEUS
F2Z2V0;Q99829	CPNE1	F2Z2V0;Q99829		Cytosol	CYTOPLASM
F2Z2W7;Q8IZ69	TRMT2A	F2Z2W7;Q8IZ69	TRANSLATION	Translation	TRANSLATION
F2Z2X0;O00746;Q4TT34	NME4	F2Z2X0;O00746;Q4TT34	MITOCHONDRIA	Mitochondria	MITOCHONDRIA
F2Z2X4;Q9C0E2	XPO4	F2Z2X4;Q9C0E2	CYTOPLASM	Cytosol	CYTOPLASM
F2Z2Y6;O95777	LSM8	F2Z2Y6;O95777		Cytosol	CYTOPLASM
F5GWA4;Q9H3F6;Q9H3F6-2	KCTD10	F5GWA4;Q9H3F6;Q9H3F6-2		Cytosol	CYTOPLASM
F5GWH5;P61165	TMEM258	F5GWH5;P61165			LD
F5GWN5;O00750	PIK3C2B	F5GWN5;O00750			CYTOPLASM
F5GWT4;Q9H4A3;Q9H4A3-2;Q9H4A3-5;Q9H4A3-6;Q9H4A3-7	WNK1	F5GWT4;Q9H4A3;Q9H4A3-2;Q9H4A3-5;Q9H4A3-6;Q9H4A3-7		Cytosol	CYTOPLASM
F5GXJ1;F5H5N1;O75251;O75251-2	NDUFS7	F5GXJ1;F5H5N1;O75251;O75251-2	MITOCHONDRIA	Mitochondria	MITOCHONDRIA
F5GXW3;F5GYR2;F5H0H9;F5H4F8;F8W771;Q8TBY8;Q8TBY8-1;Q8TBY8-3	PMFBP1	F5GXW3;F5GYR2;F5H0H9;F5H4F8;F8W771;Q8TBY8;Q8TBY8-1;Q8TBY8-3		Protein Complex	LD
F5GXX5;P61803	DAD1	F5GXX5;P61803			GOLGI APPARATUS
F5GYJ5;Q9NX18	SDHAF2	F5GYJ5;Q9NX18	MITOCHONDRIA		MITOCHONDRIA
F5GYR0;Q6H8Q1;Q6H8Q1-7;Q6H8Q1-9	ABLIM2	F5GYR0;Q6H8Q1;Q6H8Q1-7;Q6H8Q1-9			CYTOPLASM
F5GZ54	MCEE	F5GZ54	MITOCHONDRIA		GOLGI APPARATUS
F5GZ97;Q9Y3C0	WASHC3	F5GZ97;Q9Y3C0	PROTEIN-COMPLEX	Cytosol	ENDOSOME-VESICLE
F5GZG1	RAP1B	F5GZG1	PM		GOLGI APPARATUS
F5GZK9;Q8IZD4;Q8IZD4-2	DCP1B	F5GZK9;Q8IZD4;Q8IZD4-2	TRANSLATION		ENDOSOME-VESICLE
F5GZS6;J3KPF3;P08195;P08195-2;P08195-3;P08195-4	SLC3A2	F5GZS6;J3KPF3;P08195;P08195-2;P08195-3;P08195-4	PM	PM	ER
F5GZY7;Q9H0R8;Q9H0R8-2	GABARAPL1	F5GZY7;Q9H0R8;Q9H0R8-2	ENDOSOME-VESICLE	Cytosol	ENDOSOME-VESICLE
F5H0U5;Q9NZD2	GLTP	F5H0U5;Q9NZD2			CYTOPLASM
F5H199;Q8IXL7;Q8IXL7-2	MSRB3	F5H199;Q8IXL7;Q8IXL7-2	ER	ER	PM
F5H1C6;Q86UX7;Q86UX7-2	FERMT3	F5H1C6;Q86UX7;Q86UX7-2			LD
F5H1S1;Q92521	PIGB	F5H1S1;Q92521			GOLGI APPARATUS
F5H1U9;O75970;O75970-3	MPDZ	F5H1U9;O75970;O75970-3		Cytosol	CYTOPLASM
F5H269;Q9Y485	DMXL1	F5H269;Q9Y485		Protein Complex	PROTEIN-COMPLEX
F5H2A4;F5H2U8;F5H6H0;P52926;P52926-2;P52926-3;P52926-4;P52926-5;P52926-6	HMGA2	F5H2A4;F5H2U8;F5H6H0;P52926;P52926-2;P52926-3;P52926-4;P52926-5;P52926-6			LD
F5H365;Q15436	SEC23A	F5H365;Q15436		Endosome	ENDOSOME-VESICLE
F5H385;Q9BRY0	SLC39A3	F5H385;Q9BRY0	ENDOSOME-VESICLE	Golgi	GOLGI APPARATUS
F5H3D1;Q8IY45;Q8IY45-2	AMN1	F5H3D1;Q8IY45;Q8IY45-2		Cytosol	LD
F5H459;Q92572	AP3S1	F5H459;Q92572	PROTEIN-COMPLEX	Cytosol	PROTEIN-COMPLEX
F5H4N4;Q9NR77	PXMP2	F5H4N4;Q9NR77	PEROXISOME	PM	PEROXISOME
F5H4R6;F8VY35;H0YIV4;P55209;P55209-2	NAP1L1	F5H4R6;F8VY35;H0YIV4;P55209;P55209-2		Cytosol	CYTOPLASM
F5H4X8;Q96DB9	FXYD5	F5H4X8;Q96DB9			GOLGI APPARATUS
F5H5G1;H3BLU2;Q13449	LSAMP	F5H5G1;H3BLU2;Q13449		ER	ER
F5H5R8;P18440	NAT1	F5H5R8;P18440		Cytosol	CYTOPLASM
F5H5U2;Q8NHQ9	DDX55	F5H5U2;Q8NHQ9	TRANSLATION		TRANSLATION
F5H619;Q86XA9	HEATR5A	F5H619;Q86XA9		Cytosol	CYTOPLASM
F5H6F8;P36941;P36941-2	LTBR	F5H6F8;P36941;P36941-2		PM	ER
F5H6Q1;J3KR44;Q96FW1	OTUB1	F5H6Q1;J3KR44;Q96FW1	CYTOPLASM	Cytosol	CYTOPLASM
F5H6U7;G3V1U5;Q9Y3E0	GOLT1B	F5H6U7;G3V1U5;Q9Y3E0		Endosome	GOLGI APPARATUS
F5H785;P0DI81;P0DI81-3;P0DI82	TRAPPC2;TRAPPC2;TRAPPC2;TRAPPC2B	F5H785;P0DI81;P0DI81-3;P0DI82	ENDOSOME-VESICLE	Cytosol	PROTEIN-COMPLEX
F5H7P7;Q96BP3	PPWD1	F5H7P7;Q96BP3		Nucleus	CYTOPLASM
F5H8F7;Q9UBL3;Q9UBL3-2;Q9UBL3-3	ASH2L	F5H8F7;Q9UBL3;Q9UBL3-2;Q9UBL3-3		Cytosol	NUCLEUS
F5H8H2;Q03426	MVK	F5H8H2;Q03426	CYTOPLASM	Cytosol	CYTOPLASM
F6RY50;Q96FS4	SIPA1	F6RY50;Q96FS4		Nucleus	ENDOSOME-VESICLE
F6SFZ6;Q99571;Q99571-2	P2RX4	F6SFZ6;Q99571;Q99571-2			LYSOSOME
F6SKB8;Q9NVZ3;Q9NVZ3-2;Q9NVZ3-3	NECAP2	F6SKB8;Q9NVZ3;Q9NVZ3-2;Q9NVZ3-3		Cytosol	CYTOPLASM
F6SYP7;P98153;P98153-2	DGCR2	F6SYP7;P98153;P98153-2		LD	GOLGI APPARATUS
F6TB26;Q5SZR4;Q9Y2W6	TDRKH	F6TB26;Q5SZR4;Q9Y2W6	MITOCHONDRIA	Mitochondria	MITOCHONDRIA
F6TLX2;Q9HC38-2	GLOD4	F6TLX2;Q9HC38-2	CYTOPLASM	Cytosol	CYTOPLASM
F6UJY1;Q5T013	HYI	F6UJY1;Q5T013	CYTOPLASM	Cytosol	CYTOPLASM
F6VCX5;Q16816;Q16816-2	PHKG1	F6VCX5;Q16816;Q16816-2		Protein Complex	PROTEIN-COMPLEX
F6VZ39;H0YA61;Q9BX46;Q9H0Z9;Q9H0Z9-2	RBM38;RBM24;RBM24;RBM38;RBM38	F6VZ39;H0YA61;Q9BX46;Q9H0Z9;Q9H0Z9-2		Cytosol	CYTOPLASM
F8VNQ3;G3V106;Q9NT68;Q9NT68-2	TENM2	F8VNQ3;G3V106;Q9NT68;Q9NT68-2			GOLGI APPARATUS
F8VNY5;Q9P031	CCDC59	F8VNY5;Q9P031			NUCLEUS
F8VPD4;P27708	CAD	F8VPD4;P27708	PROTEIN-COMPLEX	Protein Complex	PROTEIN-COMPLEX
F8VPF7;F8W0B3;Q96D96;Q96D96-3;Q96D96-4	HVCN1	F8VPF7;F8W0B3;Q96D96;Q96D96-3;Q96D96-4			TRANSLATION
F8VQD4;Q8TAD7	C12orf75;OCC1	F8VQD4;Q8TAD7		PM	nan
F8VQD9;Q9BSB4	ATG101	F8VQD9;Q9BSB4		Cytosol	CYTOPLASM
F8VRE8;F8VS20;Q96HH6;Q96HH6-2	TMEM19	F8VRE8;F8VS20;Q96HH6;Q96HH6-2			ER
F8VS78;F8VWE0;Q12999	TSPAN31	F8VS78;F8VWE0;Q12999			nan
F8VUB4;F8VV52;Q9NZN8	CNOT2	F8VUB4;F8VV52;Q9NZN8		Endosome	PROTEIN-COMPLEX
F8VUJ3;Q8N4A0	POC1B-GALNT4;GALNT4	F8VUJ3;Q8N4A0	GOLGI APPARATUS	Golgi	GOLGI APPARATUS
F8VV56;F8VWK8;F8W022;P08962;P08962-2;P08962-3	CD63	F8VV56;F8VWK8;F8W022;P08962;P08962-2;P08962-3	PM	ER	ER
F8VV64;Q63HR2;Q63HR2-2;Q63HR2-4;Q63HR2-5;Q63HR2-6	TNS2	F8VV64;Q63HR2;Q63HR2-2;Q63HR2-4;Q63HR2-5;Q63HR2-6			CYTOPLASM
F8VVA7;P61923;P61923-4	COPZ1	F8VVA7;P61923;P61923-4		Protein Complex	PROTEIN-COMPLEX
F8VVL1;O43583	DENR	F8VVL1;O43583	CYTOPLASM	Cytosol	CYTOPLASM
F8VVS7;P55211;P55211-2;P55211-4;Q5JRU2	CASP9	F8VVS7;P55211;P55211-2;P55211-4;Q5JRU2		Cytosol	CYTOPLASM
F8VW41;Q86VP3;Q86VP3-2;Q86VP3-3;Q86VP3-4	PACS2	F8VW41;Q86VP3;Q86VP3-2;Q86VP3-3;Q86VP3-4		Protein Complex	PROTEIN-COMPLEX
F8VW96;Q16527	CSRP2	F8VW96;Q16527		Cytosol	ENDOSOME-VESICLE
F8VWW7;Q8NCJ5	SPRYD3	F8VWW7;Q8NCJ5		PM	TRANSLATION
F8VXC8;Q8TAQ2;Q8TAQ2-2;Q8TAQ2-3	SMARCC2	F8VXC8;Q8TAQ2;Q8TAQ2-2;Q8TAQ2-3		Cytosol	NUCLEUS
F8VXD5;Q53FV1	ORMDL2	F8VXD5;Q53FV1		ER	LD
F8VXG7;Q99590;Q99590-2	SCAF11	F8VXG7;Q99590;Q99590-2	NUCLEUS	Nucleus	NUCLEUS
F8VXY6;G3V1V1;Q8TBF4	ZCRB1	F8VXY6;G3V1V1;Q8TBF4		Nucleus	TRANSLATION
F8VYE8;P36873;P36873-2	PPP1CC	F8VYE8;P36873;P36873-2		Cytosol	CYTOPLASM
F8VZQ9;P82979	SARNP	F8VZQ9;P82979		Nucleus	CYTOPLASM
F8W038;Q8IXM2;Q8IXM2-3	C17orf49;BAP18;BAP18	F8W038;Q8IXM2;Q8IXM2-3		Cytosol	CYTOPLASM
F8W0Q9;Q8NEY8-2;Q8NEY8-8;Q8NEY8-9	PPHLN1	F8W0Q9;Q8NEY8-2;Q8NEY8-8;Q8NEY8-9		Nucleus	NUCLEUS
F8W1C3;Q99542	MMP19	F8W1C3;Q99542			LD
F8W1F5;Q8IVF7	FMNL3	F8W1F5;Q8IVF7	ENDOSOME-VESICLE	PM	TRANSLATION
F8W1T6;Q15434	RBMS2	F8W1T6;Q15434		ER	ER
F8W6G1;Q9UHY1	NRBP1	F8W6G1;Q9UHY1	CYTOPLASM	Cytosol	CYTOPLASM
F8W6M3;H0Y6A5;Q9NYG2;Q9NYG2-2	ZDHHC3	F8W6M3;H0Y6A5;Q9NYG2;Q9NYG2-2		Golgi	GOLGI APPARATUS
F8W727;P62910	RPL32	F8W727;P62910	TRANSLATION	Translation	TRANSLATION
F8W7C6	RPL10	F8W7C6	TRANSLATION	Translation	TRANSLATION
F8W7Q4;Q96A26	FAM162A	F8W7Q4;Q96A26	MITOCHONDRIA	Mitochondria	MITOCHONDRIA
F8W8C2	VEZT	F8W8C2		Protein Complex	ER
F8W8D3;H7C4H8;Q14493	SLBP	F8W8D3;H7C4H8;Q14493			ENDOSOME-VESICLE
F8W8I6;P31483	TIA1	F8W8I6;P31483		Cytosol	CYTOPLASM
F8W925;J3QLG5;Q8NFI3;Q8NFI3-2;Q8NFI3-3	ENGASE	F8W925;J3QLG5;Q8NFI3;Q8NFI3-2;Q8NFI3-3		Cytosol	PROTEIN-COMPLEX
F8W930;Q9Y6M1;Q9Y6M1-1	IGF2BP2	F8W930;Q9Y6M1;Q9Y6M1-1		Endosome	TRANSLATION
F8W9J4;Q03001	DST	F8W9J4;Q03001		Protein Complex	CYTOPLASM
F8W9X7;Q567U6	CCDC93	F8W9X7;Q567U6	ENDOSOME-VESICLE	Protein Complex	PROTEIN-COMPLEX
F8WA11;Q7Z460;Q7Z460-2;Q7Z460-3;Q7Z460-4;Q7Z460-5	CLASP1	F8WA11;Q7Z460;Q7Z460-2;Q7Z460-3;Q7Z460-4;Q7Z460-5		Protein Complex	TRANSLATION
F8WA39;Q13613	MTMR1	F8WA39;Q13613		Cytosol	TRANSLATION
F8WAJ0;Q9H8H2	DDX31	F8WAJ0;Q9H8H2			NUCLEUS
F8WBA3;Q15139	PRKD1	F8WBA3;Q15139		Cytosol	CYTOPLASM
F8WCA0;J3QRU4;L7N2F9;P63027	VAMP2;VAMP2;ENSG00000263620;VAMP2	F8WCA0;J3QRU4;L7N2F9;P63027		Endosome	ENDOSOME-VESICLE
F8WCF6;P59998;P59998-3	ARPC4-TTLL3;ARPC4;ARPC4	F8WCF6;P59998;P59998-3		Cytosol	CYTOPLASM
F8WCZ3;Q96NT0	CCDC115	F8WCZ3;Q96NT0	ER	ER	ER
F8WDZ3;Q96FZ5;Q96FZ5-2	CMTM7	F8WDZ3;Q96FZ5;Q96FZ5-2			ENDOSOME-VESICLE
F8WE88;G3V394;Q9Y4I1;Q9Y4I1-2;Q9Y4I1-3	MYO5A	F8WE88;G3V394;Q9Y4I1;Q9Y4I1-2;Q9Y4I1-3		Endosome	ENDOSOME-VESICLE
F8WE91;Q9Y6K1;Q9Y6K1-3	DNMT3A	F8WE91;Q9Y6K1;Q9Y6K1-3			CYTOPLASM
F8WET0;Q8IW19	APLF	F8WET0;Q8IW19			NUCLEUS
F8WJN3;Q16630;Q16630-2;Q16630-3	CPSF6	F8WJN3;Q16630;Q16630-2;Q16630-3		Nucleus	CYTOPLASM
G3V0I5;P49821;P49821-2	NDUFV1	G3V0I5;P49821;P49821-2	MITOCHONDRIA	Mitochondria	MITOCHONDRIA
G3V169;P29466;P29466-2;P29466-3	CASP1	G3V169;P29466;P29466-2;P29466-3	CYTOPLASM	Cytosol	CYTOPLASM
G3V180;G3V1D3;Q9NY33	DPP3	G3V180;G3V1D3;Q9NY33	CYTOPLASM	Cytosol	CYTOPLASM
G3V198;Q12769	NUP160	G3V198;Q12769	NUCLEUS	Nucleus	NUCLEUS
G3V1A6;P57764	GSDMD	G3V1A6;P57764		Cytosol	LD
G3V1D7	RTN4RL2	G3V1D7			LD
G3V1L9;Q07157	TJP1	G3V1L9;Q07157		Cytosol	CYTOPLASM
G3V1P3;Q969J3	BORCS5	G3V1P3;Q969J3		Protein Complex	ER
G3V1P5;Q96RN5;Q96RN5-2;Q96RN5-3	MED15	G3V1P5;Q96RN5;Q96RN5-2;Q96RN5-3		Nucleus	CYTOPLASM
G3V1S7;M0R2V0;Q92839	HAS1	G3V1S7;M0R2V0;Q92839			PROTEIN-COMPLEX
G3V203;Q07020	RPL18	G3V203;Q07020	TRANSLATION	Translation	TRANSLATION
G3V256;Q6PJT7;Q6PJT7-10;Q6PJT7-11;Q6PJT7-2;Q6PJT7-3;Q6PJT7-4;Q6PJT7-5;Q6PJT7-9	ZC3H14	G3V256;Q6PJT7;Q6PJT7-10;Q6PJT7-11;Q6PJT7-2;Q6PJT7-3;Q6PJT7-4;Q6PJT7-5;Q6PJT7-9	NUCLEUS	Nucleus	NUCLEUS
G3V2D5;G3V2P5;Q07352	ZFP36L1	G3V2D5;G3V2P5;Q07352			CYTOPLASM
G3V2D8;Q68DK2;Q68DK2-2;Q68DK2-5	ZFYVE26	G3V2D8;Q68DK2;Q68DK2-2;Q68DK2-5		Protein Complex	ENDOSOME-VESICLE
G3V2K1;H0YJC5;Q969Q6;Q969Q6-2	PPP2R3C	G3V2K1;H0YJC5;Q969Q6;Q969Q6-2			ENDOSOME-VESICLE
G3V2M0;G3V424;G3V5I4;H0YM28;Q4LDG9;Q4LDG9-2;Q4LDG9-3	DNAL1	G3V2M0;G3V424;G3V5I4;H0YM28;Q4LDG9;Q4LDG9-2;Q4LDG9-3			CYTOPLASM
G3V2N3;P54821;P54821-2	PRRX1	G3V2N3;P54821;P54821-2			NUCLEUS
G3V2U7;P07311	ACYP1	G3V2U7;P07311	CYTOPLASM	Cytosol	CYTOPLASM
G3V325	ATP5MF-PTCD1	G3V325		Mitochondria	MITOCHONDRIA
G3V3A4;Q13573	SNW1	G3V3A4;Q13573	NUCLEUS	Nucleus	NUCLEUS
G3V3X5;Q14767	LTBP2	G3V3X5;Q14767		Mitochondria	LD
G3V3Y1;Q8N8N7	ENSG00000258653;PTGR2	G3V3Y1;Q8N8N7		Cytosol	CYTOPLASM
G3V4K3;Q9H9C1	VIPAS39	G3V4K3;Q9H9C1		Cytosol	CYTOPLASM
G3V4P8;P60983	GMFB	G3V4P8;P60983	CYTOPLASM	Cytosol	CYTOPLASM
G3V4U0;Q9UBX5	FBLN5	G3V4U0;Q9UBX5			LD
G3V4X7;G3V541;G3V5A5;H0YIZ6;H0YJ09;Q9H6D7	HAUS4	G3V4X7;G3V541;G3V5A5;H0YIZ6;H0YJ09;Q9H6D7			GOLGI APPARATUS
G3V529;Q9GZR7;Q9GZR7-2	DDX24	G3V529;Q9GZR7;Q9GZR7-2	NUCLEUS	Nucleus	NUCLEUS
G3V583;Q8N128;Q8N128-2	FAM177A1	G3V583;Q8N128;Q8N128-2		Endosome	GOLGI APPARATUS
G3V599;Q96PC5;Q96PC5-10;Q96PC5-14;Q96PC5-7;Q96PC5-9	MIA2	G3V599;Q96PC5;Q96PC5-10;Q96PC5-14;Q96PC5-7;Q96PC5-9	ER	ER	ER
G3V5N8;Q9HBF4;Q9HBF4-3	ZFYVE1	G3V5N8;Q9HBF4;Q9HBF4-3		Cytosol	LD
G3V5P5;Q9UPI3;Q9UPI3-2	FLVCR2	G3V5P5;Q9UPI3;Q9UPI3-2		ER	GOLGI APPARATUS
G3V5V3;O60524;O60524-4;O60524-5	NEMF	G3V5V3;O60524;O60524-4;O60524-5		Translation	TRANSLATION
G3V5Z7;P60900	PSMA6	G3V5Z7;P60900	PROTEIN-COMPLEX	Protein Complex	PROTEIN-COMPLEX
G3XAA2;O95819-4;O95819-5	MAP4K4	G3XAA2;O95819-4;O95819-5			TRANSLATION
G3XAG1;Q96ME7;Q96ME7-2;Q96ME7-3	ZNF512	G3XAG1;Q96ME7;Q96ME7-2;Q96ME7-3		Nucleus	NUCLEUS
G3XAH0	SEPTIN5	G3XAH0		Cytosol	CYTOPLASM
G3XAI2;P07942	LAMB1	G3XAI2;P07942	ER	PM	ER
G3XAK1;H7C0F8;P26927;Q2TV78;Q2TV78-2	MST1;MST1;MST1;MST1L;MST1L	G3XAK1;H7C0F8;P26927;Q2TV78;Q2TV78-2			NUCLEUS
G3XAN8;Q9Y5J9	TIMM8B	G3XAN8;Q9Y5J9	MITOCHONDRIA	Mitochondria	MITOCHONDRIA
G4U4J3;Q8NDF8;Q8NDF8-5	TENT4B	G4U4J3;Q8NDF8;Q8NDF8-5			TRANSLATION
G5E953;Q13615;Q13615-2;Q13615-3	MTMR3	G5E953;Q13615;Q13615-2;Q13615-3		Endosome	ENDOSOME-VESICLE
G5E972	TMPO	G5E972	NUCLEUS		LYSOSOME
G5E994;Q5VW38;Q5VW38-2	GPR107	G5E994;Q5VW38;Q5VW38-2		Translation	ENDOSOME-VESICLE
G5E9A6;P51784	USP11	G5E9A6;P51784		Cytosol	CYTOPLASM
G5E9C2;I3L4X3;Q15653;Q15653-2	NFKBIB	G5E9C2;I3L4X3;Q15653;Q15653-2		Cytosol	CYTOPLASM
G5E9C8;Q07889	SOS1	G5E9C8;Q07889	CYTOPLASM	Cytosol	CYTOPLASM
G5E9G4;Q9ULT0;Q9ULT0-4	TTC7A	G5E9G4;Q9ULT0;Q9ULT0-4		PM	TRANSLATION
G5E9M4;Q9NRM2	ZNF277	G5E9M4;Q9NRM2			ER
G5E9P3;Q9NYS0	NKIRAS1	G5E9P3;Q9NYS0	CYTOPLASM	Cytosol	CYTOPLASM
G5E9V5;G5E9W7;P82650	MRPS22	G5E9V5;G5E9W7;P82650	MITOCHONDRIA	Mitochondria	MITOCHONDRIA
G5E9W2;Q9P2E5	CHPF2	G5E9W2;Q9P2E5			ER
G5E9W3;Q9UKF6	CPSF3	G5E9W3;Q9UKF6		Nucleus	NUCLEUS
G5EA09	SDCBP	G5EA09		ER	LYSOSOME
G5EA30;Q92879;Q92879-2;Q92879-3	CELF1	G5EA30;Q92879;Q92879-2;Q92879-3		Translation	TRANSLATION
G5EA42;Q9NZR1	TMOD2	G5EA42;Q9NZR1		Cytosol	PROTEIN-COMPLEX
G8JLA1;Q8NBN7	RDH13	G8JLA1;Q8NBN7	MITOCHONDRIA	Mitochondria	MITOCHONDRIA
G8JLB3;Q9Y606;Q9Y606-2	PUS1	G8JLB3;Q9Y606;Q9Y606-2	MITOCHONDRIA	Mitochondria	MITOCHONDRIA
G8JLB6;P31943	HNRNPH1	G8JLB6;P31943		Nucleus	CYTOPLASM
G8JLK1;Q9NZ43	USE1	G8JLK1;Q9NZ43	ER	ER	ER
G8JLP4;Q9Y4F3;Q9Y4F3-3;Q9Y4F3-4;Q9Y4F3-5	MARF1	G8JLP4;Q9Y4F3;Q9Y4F3-3;Q9Y4F3-4;Q9Y4F3-5			ENDOSOME-VESICLE
H-INV:HIT000292931	Tax_Id=9606				PROTEIN-COMPLEX
H0Y339;Q8NHY2;Q8NHY2-2;Q8NHY2-4	COP1	H0Y339;Q8NHY2;Q8NHY2-2;Q8NHY2-4			TRANSLATION
H0Y368;O60762;Q5QPK2	DPM1	H0Y368;O60762;Q5QPK2	ER	ER	ER
H0Y3R8	TJP1	H0Y3R8			LYSOSOME
H0Y3W9;Q9H4W6;Q9H4W6-2	EBF3	H0Y3W9;Q9H4W6;Q9H4W6-2	NUCLEUS	Nucleus	NUCLEUS
H0Y400	DDX39B	H0Y400			NUCLEUS
H0Y403;Q86VZ6;Q86VZ6-2	JAZF1	H0Y403;Q86VZ6;Q86VZ6-2			LD
H0Y4E8	SIK3	H0Y4E8		Protein Complex	PROTEIN-COMPLEX
H0Y4K4;Q5TAA8;Q92902;Q92902-2;Q92902-3;Q92902-4	HPS1	H0Y4K4;Q5TAA8;Q92902;Q92902-2;Q92902-3;Q92902-4			PROTEIN-COMPLEX
H0Y4Q6;Q8WUA4	GTF3C2	H0Y4Q6;Q8WUA4			NUCLEUS
H0Y4U7;Q8IUA7	ABCA9	H0Y4U7;Q8IUA7			GOLGI APPARATUS
H0Y4Y2;Q6IQ20	NAPEPLD	H0Y4Y2;Q6IQ20			GOLGI APPARATUS
H0Y509;O60478	GPR137B	H0Y509;O60478			LYSOSOME
H0Y5B0	EPB41L2	H0Y5B0	PM	PM	PM
H0Y5B4;H7BZ11;J3KQN4;P83881	RPL36A;RPL36A-HNRNPH2;RPL36A;RPL36A	H0Y5B4;H7BZ11;J3KQN4;P83881	TRANSLATION	Translation	TRANSLATION
H0Y5F5	PABPC4	H0Y5F5			ER
H0Y5I5;Q8N1G0;Q8N1G0-2	ZNF687	H0Y5I5;Q8N1G0;Q8N1G0-2			NUCLEUS
H0Y5J5;Q7RTV5	PRXL2C	H0Y5J5;Q7RTV5		Golgi	GOLGI APPARATUS
H0Y5K5;H0Y621;Q9Y282;Q9Y282-2;Q9Y282-3	ERGIC3	H0Y5K5;H0Y621;Q9Y282;Q9Y282-2;Q9Y282-3	GOLGI APPARATUS	Endosome	GOLGI APPARATUS
H0Y5N9	COL12A1	H0Y5N9			GOLGI APPARATUS
H0Y614;P61960	UFM1	H0Y614;P61960		Cytosol	CYTOPLASM
H0Y679;H0YE12;Q92733	PRCC	H0Y679;H0YE12;Q92733		Cytosol	CYTOPLASM
H0Y6D8;P20226;P20226-2;Q32MN6;Q6SJ96	TBP;TBP;TBP;TBP;TBPL2	H0Y6D8;P20226;P20226-2;Q32MN6;Q6SJ96			NUCLEUS
H0Y6F5;Q9H4I2	ZHX3	H0Y6F5;Q9H4I2		Nucleus	NUCLEUS
H0Y6T6;Q8IXM6	NRM	H0Y6T6;Q8IXM6	NUCLEUS	Nucleus	NUCLEUS
H0Y6V6;Q8WVP7;Q8WVP7-3	LMBR1	H0Y6V6;Q8WVP7;Q8WVP7-3			GOLGI APPARATUS
H0Y7P7;Q9UG56	PISD	H0Y7P7;Q9UG56	MITOCHONDRIA	Cytosol	MITOCHONDRIA
H0Y858	ENSG00000173366	H0Y858		Lysosome	CYTOPLASM
H0Y8G9;Q15034	HERC3	H0Y8G9;Q15034	CYTOPLASM	Cytosol	PROTEIN-COMPLEX
H0Y8J2;Q03188	CENPC	H0Y8J2;Q03188			NUCLEUS
H0Y8P0;Q86TI0	TBC1D1	H0Y8P0;Q86TI0			LD
H0Y8P4;Q8TED0;Q8TED0-3	UTP15	H0Y8P4;Q8TED0;Q8TED0-3		Nucleus	NUCLEUS
H0Y8Y5	ACSF2	H0Y8Y5	MITOCHONDRIA		MITOCHONDRIA
H0Y920;Q96JK9	MAML3	H0Y920;Q96JK9	TRANSLATION		CYTOPLASM
H0Y962;Q8N4T8;Q8N4T8-2	CBR4	H0Y962;Q8N4T8;Q8N4T8-2	MITOCHONDRIA	Mitochondria	MITOCHONDRIA
H0Y997;Q96J42;Q96J42-2	TXNDC15	H0Y997;Q96J42;Q96J42-2	ER	ER	ER
H0Y9C1;H0Y9Z5;Q96LI5	CNOT6L	H0Y9C1;H0Y9Z5;Q96LI5		Cytosol	TRANSLATION
H0YA52;Q9H0N5	PCBD2	H0YA52;Q9H0N5		Cytosol	CYTOPLASM
H0YAA8;Q9H204	MED28	H0YAA8;Q9H204		Nucleus	LYSOSOME
H0YAB3	SEC31A	H0YAB3	ENDOSOME-VESICLE	Protein Complex	PROTEIN-COMPLEX
H0YAN7;Q86XE3	MICU3	H0YAN7;Q86XE3	MITOCHONDRIA	Mitochondria	MITOCHONDRIA
H0YAR2	PABPC1	H0YAR2		Golgi	PROTEIN-COMPLEX
H0YBI6;H0YBQ0;Q86VQ6	TXNRD3	H0YBI6;H0YBQ0;Q86VQ6			CYTOPLASM
H0YBL1;P29218;P29218-3	IMPA1	H0YBL1;P29218;P29218-3		Cytosol	CYTOPLASM
H0YBS1;H0YC12;J3KNV5;Q75QN2;Q75QN2-2	INTS8	H0YBS1;H0YC12;J3KNV5;Q75QN2;Q75QN2-2			nan
H0YBZ4;Q15390;Q15390-2	MTFR1	H0YBZ4;Q15390;Q15390-2	MITOCHONDRIA		MITOCHONDRIA
H0YCW1	FNTA	H0YCW1	CYTOPLASM	Cytosol	CYTOPLASM
H0YCY6;Q3LXA3;Q3LXA3-2	TKFC	H0YCY6;Q3LXA3;Q3LXA3-2	CYTOPLASM	Cytosol	CYTOPLASM
H0YD14	MYOF	H0YD14	ENDOSOME-VESICLE		ENDOSOME-VESICLE
H0YD36;P54098	POLG	H0YD36;P54098	MITOCHONDRIA		MITOCHONDRIA
H0YD93;Q8WXA3;Q8WXA3-1;Q8WXA3-3	RUFY2	H0YD93;Q8WXA3;Q8WXA3-1;Q8WXA3-3		Cytosol	ENDOSOME-VESICLE
H0YDB2	STIM1	H0YDB2	ER		ER
H0YDD8	RPLP2	H0YDD8	TRANSLATION		TRANSLATION
H0YEB6;O60232	ZNRD2	H0YEB6;O60232	CYTOPLASM	Cytosol	PROTEIN-COMPLEX
H0YEF7	PICALM	H0YEF7			nan
H0YF29;Q6P1X6	C8orf82	H0YF29;Q6P1X6		Mitochondria	MITOCHONDRIA
H0YFD6;P40939	HADHA	H0YFD6;P40939	MITOCHONDRIA	Mitochondria	MITOCHONDRIA
H0YFL9;H0YH04;O75953;O75953-4;O75953-5	DNAJB5	H0YFL9;H0YH04;O75953;O75953-4;O75953-5			PROTEIN-COMPLEX
H0YFW7;Q9NS93	TM7SF3	H0YFW7;Q9NS93	LYSOSOME		LYSOSOME
H0YGR4;Q9Y3B8	REXO2	H0YGR4;Q9Y3B8	MITOCHONDRIA	Cytosol	CYTOPLASM
H0YGS3	MFAP5	H0YGS3		Mitochondria	LD
H0YGX7;P52566	ARHGDIB	H0YGX7;P52566			CYTOPLASM
H0YH82	CS	H0YH82			nan
H0YHE2;Q8WYA0	IFT81	H0YHE2;Q8WYA0			PROTEIN-COMPLEX
H0YHF6;H0YIE9;O94952;O94952-1;Q4G104	FBXO21	H0YHF6;H0YIE9;O94952;O94952-1;Q4G104			MITOCHONDRIA
H0YI02;J3KPG1;Q96QF0;Q96QF0-2;Q96QF0-3;Q96QF0-4;Q96QF0-5;Q96QF0-6;Q96QF0-7	RAB3IP	H0YI02;J3KPG1;Q96QF0;Q96QF0-2;Q96QF0-3;Q96QF0-4;Q96QF0-5;Q96QF0-6;Q96QF0-7			CYTOPLASM
H0YI08;Q9Y6F6;Q9Y6F6-1;Q9Y6F6-2;Q9Y6F6-3;Q9Y6F6-4;Q9Y6F6-5;Q9Y6F6-7	IRAG1	H0YI08;Q9Y6F6;Q9Y6F6-1;Q9Y6F6-2;Q9Y6F6-3;Q9Y6F6-4;Q9Y6F6-5;Q9Y6F6-7		ER	NUCLEUS
H0YI09;Q9H8H3	METTL7A	H0YI09;Q9H8H3	LD	LD	LD
H0YI37	ATP5F1B	H0YI37	MITOCHONDRIA		MITOCHONDRIA
H0YIV6;Q92994;Q92994-5;Q92994-7;Q92994-8	BRF1	H0YIV6;Q92994;Q92994-5;Q92994-7;Q92994-8		Nucleus	LD
H0YIV9	ENSG00000111780	H0YIV9		Mitochondria	MITOCHONDRIA
H0YJ03	PSMA3	H0YJ03	PROTEIN-COMPLEX	Protein Complex	PROTEIN-COMPLEX
H0YJ98	ITGA7	H0YJ98	PM	PM	ER
H0YJH7	TMPO	H0YJH7	NUCLEUS		NUCLEUS
H0YK61;H0YNK0;H0YNK8;Q5J8M3;Q5J8M3-2;Q5J8M3-3;S4R329	EMC4	H0YK61;H0YNK0;H0YNK8;Q5J8M3;Q5J8M3-2;Q5J8M3-3;S4R329	ER	ER	ER
H0YL81;H0YMI4;H0YMP6;Q6JHV3;Q9Y6I4	USP3	H0YL81;H0YMI4;H0YMP6;Q6JHV3;Q9Y6I4		Nucleus	CYTOPLASM
H0YLF3	B2M	H0YLF3	GOLGI APPARATUS	Golgi	GOLGI APPARATUS
H0YLM8;Q8TDJ6;Q8TDJ6-3	DMXL2	H0YLM8;Q8TDJ6;Q8TDJ6-3		Cytosol	ENDOSOME-VESICLE
H0YLN5;H0YN78;Q9BV29;Q9BV29-2	CCDC32	H0YLN5;H0YN78;Q9BV29;Q9BV29-2			CYTOPLASM
H0YLN8;Q96QT4	TRPM7	H0YLN8;Q96QT4		PM	ER
H0YMD1;J3KMZ9;P01130;P01130-4;P01130-5	LDLR	H0YMD1;J3KMZ9;P01130;P01130-4;P01130-5	ENDOSOME-VESICLE	ER	ENDOSOME-VESICLE
H0YMN5;Q9ULG1	INO80	H0YMN5;Q9ULG1			LYSOSOME
H0YMZ3;H0YN49;Q9NPR2;Q9NPR2-2	SEMA4B	H0YMZ3;H0YN49;Q9NPR2;Q9NPR2-2			PM
H0YN33;Q9BW66;Q9BW66-3	CINP	H0YN33;Q9BW66;Q9BW66-3		Cytosol	CYTOPLASM
H0YN81;Q9GZS3	WDR61	H0YN81;Q9GZS3	TRANSLATION	Translation	ENDOSOME-VESICLE
H0YNA2	SPPL2A	H0YNA2	PM		ENDOSOME-VESICLE
H0YNG3;P67812;P67812-3;P67812-4	SEC11A	H0YNG3;P67812;P67812-3;P67812-4	ER	ER	ER
H0YNH5;Q7L8W6	DPH6	H0YNH5;Q7L8W6		Cytosol	CYTOPLASM
H0YNK6;Q06418	TYRO3	H0YNK6;Q06418		PM	PM
H0YNP1;O94923	GLCE	H0YNP1;O94923	GOLGI APPARATUS	Golgi	GOLGI APPARATUS
H0YNU7;Q5SZE1;Q96G23	CERS2	H0YNU7;Q5SZE1;Q96G23	ER	Endosome	ER
H3BLT9;Q7RTR2;Q7RTR2-2;Q7RTR2-3;Q7RTR2-4	NLRC3	H3BLT9;Q7RTR2;Q7RTR2-2;Q7RTR2-3;Q7RTR2-4	CYTOPLASM		PROTEIN-COMPLEX
H3BLU7;O43488	AKR7A2	H3BLU7;O43488	CYTOPLASM	Cytosol	CYTOPLASM
H3BLV9;Q96SB4;Q96SB4-3;Q96SB4-4	SRPK1	H3BLV9;Q96SB4;Q96SB4-3;Q96SB4-4	TRANSLATION	Protein Complex	TRANSLATION
H3BM74;Q9Y5A7	NUB1	H3BM74;Q9Y5A7		Cytosol	CYTOPLASM
H3BM86;H3BRU1;H3BSK2;Q5XKK7;Q5XKK7-2;Q5XKK7-3	FAM219B	H3BM86;H3BRU1;H3BSK2;Q5XKK7;Q5XKK7-2;Q5XKK7-3			ENDOSOME-VESICLE
H3BM91;Q9H0A8	COMMD4	H3BM91;Q9H0A8		Cytosol	LD
H3BMD8;P56211	ARPP19	H3BMD8;P56211		Cytosol	CYTOPLASM
H3BMF4;Q9H2V7;Q9H2V7-2;Q9H2V7-3	SPNS1	H3BMF4;Q9H2V7;Q9H2V7-2;Q9H2V7-3			ER
H3BMI0;Q9NXF8;Q9NXF8-2	ZDHHC7	H3BMI0;Q9NXF8;Q9NXF8-2			TRANSLATION
H3BMJ2;Q6ZRI6;Q6ZRI6-2	C15orf39	H3BMJ2;Q6ZRI6;Q6ZRI6-2			CYTOPLASM
H3BML9;H3BN54;H3BPK4;Q96A32	MYLPF	H3BML9;H3BN54;H3BPK4;Q96A32			PROTEIN-COMPLEX
H3BMM9;H3BTC0;H3BV80;Q15287;Q15287-2;Q15287-3	RNPS1	H3BMM9;H3BTC0;H3BV80;Q15287;Q15287-2;Q15287-3		Nucleus	NUCLEUS
H3BMW7;H3BPY4;H3BTN6;Q9H6L2	TMEM231	H3BMW7;H3BPY4;H3BTN6;Q9H6L2		PM	ER
H3BNC9;P08708	ENSG00000260836;RPS17	H3BNC9;P08708	TRANSLATION	Translation	TRANSLATION
H3BNI4	ATP6V0C	H3BNI4			nan
H3BNP7;H3BPX1;H3BR52;P13498	CYBA	H3BNP7;H3BPX1;H3BR52;P13498			GOLGI APPARATUS
H3BNT4;H3BSB3;Q99547	MPHOSPH6	H3BNT4;H3BSB3;Q99547			NUCLEUS
H3BP20;P06865	HEXA	H3BP20;P06865	LYSOSOME	Lysosome	LYSOSOME
H3BP28;Q99807	COQ7	H3BP28;Q99807	MITOCHONDRIA	Mitochondria	MITOCHONDRIA
H3BP71;O75150;O75150-4	RNF40	H3BP71;O75150;O75150-4		Nucleus	CYTOPLASM
H3BPB8;P34949	MPI	H3BPB8;P34949	CYTOPLASM	Cytosol	CYTOPLASM
H3BPE1;H3BQK9	MACF1	H3BPE1;H3BQK9		Protein Complex	PROTEIN-COMPLEX
H3BPF6;Q99471	PFDN5	H3BPF6;Q99471		Protein Complex	CYTOPLASM
H3BPG6;H3BQQ2;Q86UK7;Q86UK7-2;Q86UK7-3	ZNF598	H3BPG6;H3BQQ2;Q86UK7;Q86UK7-2;Q86UK7-3		Golgi	ER
H3BPJ2;Q15041;Q15041-2	ARL6IP1	H3BPJ2;Q15041;Q15041-2	ER	ER	ER
H3BQK0;Q9UMR2;Q9UMR2-2;Q9UMR2-4	DDX19B	H3BQK0;Q9UMR2;Q9UMR2-2;Q9UMR2-4		Cytosol	CYTOPLASM
H3BQR0;H3BRI5;H3BSK1;H3BTA6;O95149	SNUPN	H3BQR0;H3BRI5;H3BSK1;H3BTA6;O95149	CYTOPLASM	Cytosol	CYTOPLASM
H3BR37;Q15554;Q15554-4	TERF2	H3BR37;Q15554;Q15554-4			NUCLEUS
H3BR70	PKM	H3BR70	CYTOPLASM	Cytosol	CYTOPLASM
H3BR94;Q9BTE1;Q9BTE1-2	DCTN5	H3BR94;Q9BTE1;Q9BTE1-2	PROTEIN-COMPLEX	Cytosol	PROTEIN-COMPLEX
H3BRB6;Q8ND25;Q8ND25-2	ZNRF1	H3BRB6;Q8ND25;Q8ND25-2		Cytosol	CYTOPLASM
H3BRF9;Q96K21;Q96K21-2	ZFYVE19	H3BRF9;Q96K21;Q96K21-2		Nucleus	CYTOPLASM
H3BRJ5;Q9P2H3-3	ENSG00000248710;IFT80	H3BRJ5;Q9P2H3-3			GOLGI APPARATUS
H3BRL0;Q9BXC9	BBS2	H3BRL0;Q9BXC9		Cytosol	PROTEIN-COMPLEX
H3BRL3;O14562	UBFD1	H3BRL3;O14562		Cytosol	CYTOPLASM
H3BRN4;P80404	ABAT	H3BRN4;P80404	MITOCHONDRIA	Mitochondria	PEROXISOME
H3BRY5;P50225	SULT1A1	H3BRY5;P50225		Cytosol	CYTOPLASM
H3BS09;J3KRR7;Q9NQC7;Q9NQC7-2	CYLD	H3BS09;J3KRR7;Q9NQC7;Q9NQC7-2		Cytosol	CYTOPLASM
H3BSC1;P62491	RAB11A	H3BSC1;P62491	ENDOSOME-VESICLE		ENDOSOME-VESICLE
H3BSM0;Q53FZ2	ACSM3	H3BSM0;Q53FZ2			MITOCHONDRIA
H3BSM5;P60520	GABARAPL2	H3BSM5;P60520	ENDOSOME-VESICLE	Cytosol	CYTOPLASM
H3BSM7;Q96GQ5	RUSF1	H3BSM7;Q96GQ5		ER	ER
H3BST1;Q9UL45	BLOC1S6	H3BST1;Q9UL45		Cytosol	ENDOSOME-VESICLE
H3BT89	TMX3	H3BT89	ER		ER
H3BTB7;Q5JPH6;Q5JPH6-2	EARS2	H3BTB7;Q5JPH6;Q5JPH6-2	MITOCHONDRIA	Mitochondria	MITOCHONDRIA
H3BU86;O14662;O14662-5	STX16-NPEPL1;STX16;STX16	H3BU86;O14662;O14662-5	ENDOSOME-VESICLE		ENDOSOME-VESICLE
H3BUB6	SCAMP2	H3BUB6	ENDOSOME-VESICLE		ENDOSOME-VESICLE
H3BUD5;Q96MX0	CMTM3	H3BUD5;Q96MX0		Nucleus	GOLGI APPARATUS
H3BUJ7;Q66K89	E4F1	H3BUJ7;Q66K89			NUCLEUS
H3BUN4;H3BUP2;O60936;O60936-3	NOL3	H3BUN4;H3BUP2;O60936;O60936-3	CYTOPLASM	Cytosol	CYTOPLASM
H3BV55;O15305	PMM2	H3BV55;O15305		Cytosol	CYTOPLASM
H3BVF7;Q0P6H9	TMEM62	H3BVF7;Q0P6H9			GOLGI APPARATUS
H6UMI1;O95166	GABARAP	H6UMI1;O95166	ENDOSOME-VESICLE	Endosome	ENDOSOME-VESICLE
H7BXD5;H7C2Z6;P28676	GCA	H7BXD5;H7C2Z6;P28676	CYTOPLASM	Protein Complex	CYTOPLASM
H7BXY3;Q7L2E3;Q7L2E3-2;Q7L2E3-3	DHX30	H7BXY3;Q7L2E3;Q7L2E3-2;Q7L2E3-3		PM	TRANSLATION
H7BY16	NCL	H7BY16			TRANSLATION
H7BY57;O94856;O94856-10;O94856-11;O94856-12;O94856-13;O94856-3;O94856-4;O94856-5;O94856-6;O94856-7;O94856-8;O94856-9;X6RKN2	NFASC	H7BY57;O94856;O94856-10;O94856-11;O94856-12;O94856-13;O94856-3;O94856-4;O94856-5;O94856-6;O94856-7;O94856-8;O94856-9;X6RKN2			GOLGI APPARATUS
H7BYC8;Q8TCX1;Q8TCX1-3	DYNC2LI1	H7BYC8;Q8TCX1;Q8TCX1-3			ENDOSOME-VESICLE
H7BYF2;Q5JRG1;Q9BVL2;Q9BVL2-2;Q9BVL2-3	NUP58	H7BYF2;Q5JRG1;Q9BVL2;Q9BVL2-2;Q9BVL2-3		Nucleus	NUCLEUS
H7BYT1;P48730;P48730-2	CSNK1D	H7BYT1;P48730;P48730-2		Protein Complex	PROTEIN-COMPLEX
H7BZJ3	PDIA3	H7BZJ3	ER	ER	ER
H7BZK6;P62068;P62068-2;P62068-3;P62068-4	USP46	H7BZK6;P62068;P62068-2;P62068-3;P62068-4		PM	ENDOSOME-VESICLE
H7BZW6;O00422;O00422-2	SAP18	H7BZW6;O00422;O00422-2		Nucleus	NUCLEUS
H7BZY3;H7C4B9;Q9P1T7;Q9P1T7-1	MDFIC	H7BZY3;H7C4B9;Q9P1T7;Q9P1T7-1	GOLGI APPARATUS	Golgi	ER
H7C0E7;H7C484;Q9H2C2	ARV1	H7C0E7;H7C484;Q9H2C2		ER	ER
H7C0N4	SF1	H7C0N4		Nucleus	NUCLEUS
H7C0X2;Q6ZSS7	MFSD6	H7C0X2;Q6ZSS7			LD
H7C0X4;Q92685	ALG3	H7C0X4;Q92685	ER	ER	ER
H7C144	ACTN4	H7C144			CYTOPLASM
H7C1I0;Q96K37	SLC35E1	H7C1I0;Q96K37	GOLGI APPARATUS	Golgi	GOLGI APPARATUS
H7C1J8	HNRNPA3	H7C1J8	NUCLEUS		NUCLEUS
H7C1N3;O15155	BET1	H7C1N3;O15155			MITOCHONDRIA
H7C1Q6;Q9NXE4;Q9NXE4-3;Q9NXE4-4	SMPD4	H7C1Q6;Q9NXE4;Q9NXE4-3;Q9NXE4-4	NUCLEUS	ER	TRANSLATION
H7C1U8;Q9BUR5	APOO	H7C1U8;Q9BUR5	MITOCHONDRIA	Mitochondria	MITOCHONDRIA
H7C1Z7;H7C270;Q9GZU7;Q9GZU7-2;Q9GZU7-3	CTDSP1	H7C1Z7;H7C270;Q9GZU7;Q9GZU7-2;Q9GZU7-3		PM	MITOCHONDRIA
H7C2Q8;Q99848	EBNA1BP2	H7C2Q8;Q99848		Nucleus	NUCLEUS
H7C3M7	FARP2	H7C3M7			nan
H7C3T2;Q2TAZ0;Q2TAZ0-3	ATG2A	H7C3T2;Q2TAZ0;Q2TAZ0-3			PROTEIN-COMPLEX
H7C4I5	CLASP2	H7C4I5			PROTEIN-COMPLEX
H7C4S4	FXR1	H7C4S4
H7C556;Q7Z7G0	ABI3BP	H7C556;Q7Z7G0			LD
H7C598;Q8IWF6	DENND6A	H7C598;Q8IWF6			ENDOSOME-VESICLE
H7C5B8;O95178	NDUFB2	H7C5B8;O95178	MITOCHONDRIA	Mitochondria	MITOCHONDRIA
H7C5J3;Q92995;Q92995-2	USP13	H7C5J3;Q92995;Q92995-2	CYTOPLASM		CYTOPLASM
H7C5V5	MTFR1	H7C5V5	MITOCHONDRIA	Mitochondria	LD
H8Y6P7;P0CAP2;P0CAP2-3	GCOM1;POLR2M;POLR2M	H8Y6P7;P0CAP2;P0CAP2-3		Cytosol	CYTOPLASM
H9KV31;O15394	NCAM2	H9KV31;O15394			GOLGI APPARATUS
H9KV45	UBE2D3	H9KV45		Cytosol	CYTOPLASM
H9KV75	ACTN1	H9KV75		Cytosol	CYTOPLASM
H9KV77;J3QRX6;Q9NQ92	COPRS	H9KV77;J3QRX6;Q9NQ92			CYTOPLASM
I3L0A0	PEDS1-UBE2V1	I3L0A0		Cytosol	CYTOPLASM
I3L0H8;Q9NUU7	DDX19A	I3L0H8;Q9NUU7		Cytosol	CYTOPLASM
I3L0L6;Q9H6Y7	RNF167	I3L0L6;Q9H6Y7	LYSOSOME	ER	LYSOSOME
I3L0N3;P46459	NSF	I3L0N3;P46459	GOLGI APPARATUS	ER	ENDOSOME-VESICLE
I3L0R0;Q641Q3;Q641Q3-2	METRNL	I3L0R0;Q641Q3;Q641Q3-2			LD
I3L0U9;I3L0V9;I3L4T6;I3L4U4;Q8TBP0;Q8TBP0-2;Q8TBP0-3;Q8TBP0-4	TBC1D16	I3L0U9;I3L0V9;I3L4T6;I3L4U4;Q8TBP0;Q8TBP0-2;Q8TBP0-3;Q8TBP0-4		Cytosol	CYTOPLASM
I3L0W4;Q96F10	SAT2	I3L0W4;Q96F10			CYTOPLASM
I3L100;I3L2W2;Q96JN8;Q96JN8-2	NEURL4	I3L100;I3L2W2;Q96JN8;Q96JN8-2		Cytosol	CYTOPLASM
I3L1A8;I3L1Q3;I3L2A9;I3L2T0;I3L3N8;I3L437;Q8TE02;Q8TE02-2;Q8TE02-3;Q8TE02-4	ELP5	I3L1A8;I3L1Q3;I3L2A9;I3L2T0;I3L3N8;I3L437;Q8TE02;Q8TE02-2;Q8TE02-3;Q8TE02-4		Cytosol	PROTEIN-COMPLEX
I3L1G1;I3L4I4;I3NI44;J3KQU4;O75674;O75674-2;O75674-3	TOM1L1	I3L1G1;I3L4I4;I3NI44;J3KQU4;O75674;O75674-2;O75674-3			CYTOPLASM
I3L1T3;Q9GZP9	DERL2	I3L1T3;Q9GZP9	ER	PM	ER
I3L1Y8;Q9HBL8	NMRAL1	I3L1Y8;Q9HBL8		Cytosol	CYTOPLASM
I3L1Y9;Q96CP2	FLYWCH2	I3L1Y9;Q96CP2		Cytosol	CYTOPLASM
I3L295;J3KT75;J3QRD5;J3QS48;J3QW43;O75352;O75352-2	MPDU1	I3L295;J3KT75;J3QRD5;J3QS48;J3QW43;O75352;O75352-2		Cytosol	ER
I3L2C7;P57678	GEMIN4	I3L2C7;P57678	TRANSLATION	Protein Complex	TRANSLATION
I3L2J7;Q86XT9	TMEM219	I3L2J7;Q86XT9			TRANSLATION
I3L2S3;Q9ULH7;Q9ULH7-2;Q9ULH7-3;Q9ULH7-4;Q9ULH7-5	MRTFB	I3L2S3;Q9ULH7;Q9ULH7-2;Q9ULH7-3;Q9ULH7-4;Q9ULH7-5		Cytosol	CYTOPLASM
I3L3S0;Q9Y5R8	TRAPPC1	I3L3S0;Q9Y5R8	PROTEIN-COMPLEX	Protein Complex	CYTOPLASM
I3L3W6;O94983;O94983-2;O94983-3;O94983-4;O94983-6	CAMTA2	I3L3W6;O94983;O94983-2;O94983-3;O94983-4;O94983-6
I3L3X5;I3NI29;Q9NRY6	PLSCR3	I3L3X5;I3NI29;Q9NRY6			ER
I3L3Y9;I3L4X7;Q13227;Q13227-2	GPS2	I3L3Y9;I3L4X7;Q13227;Q13227-2			NUCLEUS
I3L448;Q5TC12	ATPAF1	I3L448;Q5TC12	MITOCHONDRIA	Mitochondria	MITOCHONDRIA
I3L4A1;I3L4G8;Q96FZ7	CHMP6	I3L4A1;I3L4G8;Q96FZ7	PM	ER	GOLGI APPARATUS
I3L4Q4;Q9BUL5;Q9BUL5-4	PHF23	I3L4Q4;Q9BUL5;Q9BUL5-4			LD
I3L4S6;Q5MNZ6	WDR45B	I3L4S6;Q5MNZ6	GOLGI APPARATUS		ENDOSOME-VESICLE
I3VM54;Q9Y2K7	KDM2A	I3VM54;Q9Y2K7		Cytosol	GOLGI APPARATUS
J3KMZ8;Q92785	DPF2	J3KMZ8;Q92785		Nucleus	NUCLEUS
J3KN01;P55196;P55196-3	AFDN	J3KN01;P55196;P55196-3		PM	PM
J3KN16;Q5VYK3	ECPAS	J3KN16;Q5VYK3	PROTEIN-COMPLEX	Protein Complex	PROTEIN-COMPLEX
J3KN29;O00233	PSMD9	J3KN29;O00233	CYTOPLASM	Cytosol	CYTOPLASM
J3KN59;Q12982;Q12982-2	BNIP2	J3KN59;Q12982;Q12982-2		Cytosol	TRANSLATION
J3KN75;Q0IIM8	TBC1D8B	J3KN75;Q0IIM8		Protein Complex	PROTEIN-COMPLEX
J3KNB4;P49913	CAMP	J3KNB4;P49913			ER
J3KNC0;P52655	GTF2A1	J3KNC0;P52655		Cytosol	NUCLEUS
J3KND1	SAAL1	J3KND1		Cytosol	PROTEIN-COMPLEX
J3KND3;P60660	MYL6	J3KND3;P60660		Cytosol	CYTOPLASM
J3KNF6;Q6NW40	RGMB	J3KNF6;Q6NW40		Nucleus	GOLGI APPARATUS
J3KNH0;Q96MD2	C12orf66	J3KNH0;Q96MD2		Golgi	TRANSLATION
J3KNN3;P15735;P15735-2	PHKG2	J3KNN3;P15735;P15735-2	PROTEIN-COMPLEX	Protein Complex	PROTEIN-COMPLEX
J3KNN7;Q7Z569	BRAP	J3KNN7;Q7Z569		Translation	TRANSLATION
J3KP15;J3QL05;Q01130;Q01130-2	SRSF2	J3KP15;J3QL05;Q01130;Q01130-2		Cytosol	CYTOPLASM
J3KP26;Q86W74;Q86W74-1	ANKRD46	J3KP26;Q86W74;Q86W74-1		Endosome	GOLGI APPARATUS
J3KP75	PHACTR2	J3KP75			nan
J3KPA2;Q9BX74;U3KPW4	TM2D1	J3KPA2;Q9BX74;U3KPW4		PM	nan
J3KPD3;Q9Y580	RBM7	J3KPD3;Q9Y580		Nucleus	NUCLEUS
J3KPF0	HECTD4	J3KPF0		Translation	TRANSLATION
J3KPG9;Q9Y600;Q9Y600-3	CSAD	J3KPG9;Q9Y600;Q9Y600-3		Cytosol	CYTOPLASM
J3KPJ3;Q8N5S9;Q8N5S9-2	CAMKK1	J3KPJ3;Q8N5S9;Q8N5S9-2			CYTOPLASM
J3KPP0;Q9Y6G3;S4R2Z7;S4R360	MRPL42	J3KPP0;Q9Y6G3;S4R2Z7;S4R360	MITOCHONDRIA	Mitochondria	MITOCHONDRIA
J3KPP4;O95232	LUC7L3	J3KPP4;O95232			LD
J3KPS0;Q9NXW2	DNAJB12	J3KPS0;Q9NXW2	ER	ER	ER
J3KPT4;Q9H4I3	TRABD	J3KPT4;Q9H4I3		Mitochondria	MITOCHONDRIA
J3KPX7;Q99623	PHB2	J3KPX7;Q99623	MITOCHONDRIA	Mitochondria	MITOCHONDRIA
J3KQ09;J3KSW2;Q9UNA4;X6R2I3	POLI	J3KQ09;J3KSW2;Q9UNA4;X6R2I3			LD
J3KQ12;Q96G97;Q96G97-4	BSCL2	J3KQ12;Q96G97;Q96G97-4	LD	Endosome	ER
J3KQ32;Q9NTK5	OLA1	J3KQ32;Q9NTK5	CYTOPLASM	Cytosol	CYTOPLASM
J3KQ48;Q9Y3E5	PTRH2	J3KQ48;Q9Y3E5		ER	ER
J3KQ72;Q9NRD1	FBXO6	J3KQ72;Q9NRD1		Cytosol	CYTOPLASM
J3KQJ1;Q8NBJ7	SUMF2	J3KQJ1;Q8NBJ7	ER	ER	ER
J3KQL8	APOL2	J3KQL8	ER	ER	ER
J3KR72;P49848;P49848-2;P49848-3;P49848-4	TAF6	J3KR72;P49848;P49848-2;P49848-3;P49848-4			NUCLEUS
J3KR97;Q9BTW9;Q9BTW9-4	TBCD	J3KR97;Q9BTW9;Q9BTW9-4	PROTEIN-COMPLEX	Cytosol	CYTOPLASM
J3KRA9;Q96Q15	SMG1	J3KRA9;Q96Q15		Cytosol	PROTEIN-COMPLEX
J3KRG2;Q96QA5	GSDMA	J3KRG2;Q96QA5		Lysosome	PM
J3KRG9;J3KSM6;P55042	RRAD	J3KRG9;J3KSM6;P55042			LD
J3KRH3;J3QKL0;J3QKU6;K7EIV9;Q8WVB3;Q8WVB3-2	HEXD	J3KRH3;J3QKL0;J3QKU6;K7EIV9;Q8WVB3;Q8WVB3-2		Cytosol	CYTOPLASM
J3KRK0;J3QLK5;Q86UE8;Q86UE8-2;Q86UE8-3	TLK2	J3KRK0;J3QLK5;Q86UE8;Q86UE8-2;Q86UE8-3			nan
J3KRN4;J3QRB6;Q99759;Q99759-2	MAP3K3	J3KRN4;J3QRB6;Q99759;Q99759-2			GOLGI APPARATUS
J3KRP9;Q9HCD6;Q9HCD6-2	TANC2	J3KRP9;Q9HCD6;Q9HCD6-2	CYTOPLASM	Cytosol	ENDOSOME-VESICLE
J3KS15;Q14197	MRPL58	J3KS15;Q14197	MITOCHONDRIA	Mitochondria	MITOCHONDRIA
J3KS81;Q8N511	TMEM199	J3KS81;Q8N511	ER	ER	ER
J3KSE9;J3QLF4;J3QRC3;J3QRL7;J3QS35;J3QSG9;Q9BTE0-2	NAT9	J3KSE9;J3QLF4;J3QRC3;J3QRL7;J3QS35;J3QSG9;Q9BTE0-2		Cytosol	CYTOPLASM
J3KSJ5;J3QRG5;Q9BQA9;Q9BQA9-2	CYBC1	J3KSJ5;J3QRG5;Q9BQA9;Q9BQA9-2		ER	ER
J3KSJ8;Q9UD71;Q9UD71-2	PPP1R1B	J3KSJ8;Q9UD71;Q9UD71-2		Cytosol	CYTOPLASM
J3KSS7;Q9NZ52;Q9NZ52-4	GGA3	J3KSS7;Q9NZ52;Q9NZ52-4		Cytosol	CYTOPLASM
J3KTA1;Q96IG2	FBXL20	J3KTA1;Q96IG2		PM	ER
J3KTC3	HPR	J3KTC3			TRANSLATION
J3KTD1;Q5BJF2;Q86XC5	TMEM97	J3KTD1;Q5BJF2;Q86XC5		Mitochondria	GOLGI APPARATUS
J3KTE4;J3QR09;P84098	RPL19	J3KTE4;J3QR09;P84098	TRANSLATION	Translation	TRANSLATION
J3KTF9;Q8N138;Q8N138-4	ORMDL3	J3KTF9;Q8N138;Q8N138-4		Endosome	LD
J3KTI2;Q9BRT3	MIEN1	J3KTI2;Q9BRT3	CYTOPLASM		CYTOPLASM
J3KTL2;Q07955	SRSF1	J3KTL2;Q07955	NUCLEUS	Nucleus	NUCLEUS
J3KTN6;J3QLV8;Q9Y5W9;Q9Y5W9-2	SNX11	J3KTN6;J3QLV8;Q9Y5W9;Q9Y5W9-2		Cytosol	ER
J3QL54;Q9BW27;Q9BW27-3	NUP85	J3QL54;Q9BW27;Q9BW27-3	NUCLEUS	Nucleus	NUCLEUS
J3QL71;Q96FV2	SCRN2	J3QL71;Q96FV2		Cytosol	CYTOPLASM
J3QLE4;Q6P1R4	DUS1L	J3QLE4;Q6P1R4		Cytosol	CYTOPLASM
J3QLE5;P14678;P14678-2;P14678-3;P63162;P63162-2	SNRPN;SNRPB;SNRPB;SNRPB;SNRPN;SNRPN	J3QLE5;P14678;P14678-2;P14678-3;P63162;P63162-2	NUCLEUS	Nucleus	NUCLEUS
J3QLQ8;Q9NWM3;Q9NWM3-2	CUEDC1	J3QLQ8;Q9NWM3;Q9NWM3-2			CYTOPLASM
J3QLS3;Q9Y2R9	MRPS7	J3QLS3;Q9Y2R9	MITOCHONDRIA	Mitochondria	MITOCHONDRIA
J3QQJ0;Q9UHR5;Q9UHR5-2	SAP30BP	J3QQJ0;Q9UHR5;Q9UHR5-2		Cytosol	NUCLEUS
J3QQK6;P02686;P02686-2	MBP	J3QQK6;P02686;P02686-2			PM
J3QQR8;J3QQX6;J3QRQ1;J3QRT5;P13598	ICAM2	J3QQR8;J3QQX6;J3QRQ1;J3QRT5;P13598			GOLGI APPARATUS
J3QQW9;Q15022	SUZ12	J3QQW9;Q15022		Nucleus	NUCLEUS
J3QRF7;K7EPJ7;Q96NT5;Q96NT5-2	SLC46A1	J3QRF7;K7EPJ7;Q96NT5;Q96NT5-2			LYSOSOME
J3QRG6;K7ENC6;K7ES20;P42771;P42771-2;P42771-4	CDKN2A	J3QRG6;K7ENC6;K7ES20;P42771;P42771-2;P42771-4		Cytosol	CYTOPLASM
J3QRN6;K7EIG7;O94832	MYO1D	J3QRN6;K7EIG7;O94832		PM	LD
J3QRP2;Q8IZR5;Q8IZR5-2;Q8IZR5-3	CMTM4	J3QRP2;Q8IZR5;Q8IZR5-2;Q8IZR5-3		Mitochondria	ER
J3QRS9;O43670;O43670-2;O43670-4	ZNF207	J3QRS9;O43670;O43670-2;O43670-4	NUCLEUS	Nucleus	NUCLEUS
J3QRU1;P07947	YES1	J3QRU1;P07947		PM	PM
J3QS10	STARD3	J3QS10		ER	LYSOSOME
J3QS41	HELZ	J3QS41		Translation	TRANSLATION
J3QSH4;Q14119	VEZF1	J3QSH4;Q14119		Nucleus	NUCLEUS
J3QSS3;Q9BZC7;Q9BZC7-3	ABCA2	J3QSS3;Q9BZC7;Q9BZC7-3	ENDOSOME-VESICLE	Endosome	ENDOSOME-VESICLE
J3QSV6;O76021	RSL1D1	J3QSV6;O76021		Nucleus	NUCLEUS
J3QT28;O43684;O43684-2	BUB3	J3QT28;O43684;O43684-2	NUCLEUS	Nucleus	TRANSLATION
J3QTA6;Q9BRQ6	CHCHD6	J3QTA6;Q9BRQ6	MITOCHONDRIA	Mitochondria	MITOCHONDRIA
J9JIC5;Q9HAS0	C17orf75	J9JIC5;Q9HAS0		Translation	ENDOSOME-VESICLE
J9JIG6;Q96EG1	ARSG	J9JIG6;Q96EG1	LYSOSOME		LYSOSOME
K4DI92;Q6NW29	RWDD4	K4DI92;Q6NW29		Cytosol	CYTOPLASM
K7EID0;Q9UH92;Q9UH92-2;Q9UH92-3	MLX	K7EID0;Q9UH92;Q9UH92-2;Q9UH92-3		Cytosol	CYTOPLASM
K7EIE8;O95983;O95983-2	MBD3	K7EIE8;O95983;O95983-2			NUCLEUS
K7EIG9;Q96D70	R3HDM4	K7EIG9;Q96D70		Translation	PROTEIN-COMPLEX
K7EIN2;Q9BRJ7	NUDT16L1	K7EIN2;Q9BRJ7		Cytosol	LD
K7EIP7;K7ERW0;Q9BWQ6	YIPF2	K7EIP7;K7ERW0;Q9BWQ6		Protein Complex	ENDOSOME-VESICLE
K7EIU8;Q13485	SMAD4	K7EIU8;Q13485	CYTOPLASM	Cytosol	CYTOPLASM
K7EIY1;Q9Y421;Q9Y421-3	FAM32A	K7EIY1;Q9Y421;Q9Y421-3			NUCLEUS
K7EIY4;O60499;Q5U8S2	STX10	K7EIY4;O60499;Q5U8S2	ENDOSOME-VESICLE	Endosome	ENDOSOME-VESICLE
K7EIY6;Q9BV68	RNF126	K7EIY6;Q9BV68		Cytosol	CYTOPLASM
K7EIY8;M0R3E2;Q6PI98;Q6PI98-3;Q6PI98-4	INO80C	K7EIY8;M0R3E2;Q6PI98;Q6PI98-3;Q6PI98-4			NUCLEUS
K7EJ35;O43760;O43760-2	SYNGR2	K7EJ35;O43760;O43760-2		Cytosol	ENDOSOME-VESICLE
K7EJA9;K7EK72;K7EKH4;K7EM54;K7EQT8;K7ES67;Q96CS2	HAUS1	K7EJA9;K7EK72;K7EKH4;K7EM54;K7EQT8;K7ES67;Q96CS2	CYTOPLASM	Cytosol	CYTOPLASM
K7EJH8	ACTN4	K7EJH8		Protein Complex	PROTEIN-COMPLEX
K7EJJ1	AP1M2	K7EJJ1		Protein Complex	CYTOPLASM
K7EJS5;Q6NUT3;Q6NUT3-2;Q6NUT3-3;Q6NUT3-4	MFSD12	K7EJS5;Q6NUT3;Q6NUT3-2;Q6NUT3-3;Q6NUT3-4			LYSOSOME
K7EK00;Q96ND0	FAM210A	K7EK00;Q96ND0	MITOCHONDRIA	Mitochondria	MITOCHONDRIA
K7EK07;P84243	H3-3B;H3-3A	K7EK07;P84243			NUCLEUS
K7EK33;K7EQ02;K7EQ55;Q96EP5;Q96EP5-2	DAZAP1	K7EK33;K7EQ02;K7EQ55;Q96EP5;Q96EP5-2		Cytosol	CYTOPLASM
K7EK35;P42229	STAT5A	K7EK35;P42229	CYTOPLASM	Cytosol	CYTOPLASM
K7EKE6;P36776;P36776-2	LONP1	K7EKE6;P36776;P36776-2	MITOCHONDRIA	Mitochondria	MITOCHONDRIA
K7EL44;Q32NB8;Q32NB8-2	PGS1	K7EL44;Q32NB8;Q32NB8-2	MITOCHONDRIA	Mitochondria	MITOCHONDRIA
K7EL81	PPP1R12C	K7EL81		Cytosol	CYTOPLASM
K7ELC2;P62841	RPS15	K7ELC2;P62841	TRANSLATION	Translation	TRANSLATION
K7ELC7;P61353	RPL27	K7ELC7;P61353	TRANSLATION	Translation	TRANSLATION
K7ELE3;Q08117;Q08117-2	TLE5	K7ELE3;Q08117;Q08117-2		Cytosol	PROTEIN-COMPLEX
K7ELH8;Q6ZPD9	DPY19L3	K7ELH8;Q6ZPD9		ER	GOLGI APPARATUS
K7ELL7;P14314;P14314-2	PRKCSH	K7ELL7;P14314;P14314-2	ER	ER	ER
K7EM18;P41567	EIF1	K7EM18;P41567		Cytosol	CYTOPLASM
K7EM38	ACTG1	K7EM38			TRANSLATION
K7EM86;Q8IWZ8;V9GZ08	SUGP1	K7EM86;Q8IWZ8;V9GZ08			NUCLEUS
K7EMC9;Q969T9	WBP2	K7EMC9;Q969T9	CYTOPLASM	Cytosol	CYTOPLASM
K7EMR7;O75298;O75298-2;O75298-3	RTN2	K7EMR7;O75298;O75298-2;O75298-3			NUCLEUS
K7EN45;Q13526	PIN1	K7EN45;Q13526		Cytosol	CYTOPLASM
K7ENE2;Q8IVV7	GID4	K7ENE2;Q8IVV7	CYTOPLASM	Protein Complex	PROTEIN-COMPLEX
K7ENF0	NARS1	K7ENF0	CYTOPLASM		NUCLEUS
K7ENI6;K7ERE1;Q8N2U0	TMEM256-PLSCR3;TMEM256-PLSCR3;TMEM256	K7ENI6;K7ERE1;Q8N2U0		Mitochondria	MITOCHONDRIA
K7ENL9;Q96DM3	RMC1	K7ENL9;Q96DM3			PM
K7ENR6;Q969U7;Q969U7-2	PSMG2	K7ENR6;Q969U7;Q969U7-2			CYTOPLASM
K7EP07;Q99426;Q99426-2	TBCB	K7EP07;Q99426;Q99426-2	CYTOPLASM	Cytosol	CYTOPLASM
K7EP90;K7EQ03;Q9BTD8;Q9BTD8-2;Q9BTD8-3;Q9BTD8-4	RBM42	K7EP90;K7EQ03;Q9BTD8;Q9BTD8-2;Q9BTD8-3;Q9BTD8-4		Nucleus	nan
K7EPA3;Q9NX61;Q9NX61-2	TMEM161A	K7EPA3;Q9NX61;Q9NX61-2			ER
K7EPI4	GFAP	K7EPI4			LD
K7EPN1;K7EPS3;Q9GZN7	ROGDI	K7EPN1;K7EPS3;Q9GZN7			PROTEIN-COMPLEX
K7EPR0;Q6UW68	TMEM205	K7EPR0;Q6UW68		ER	GOLGI APPARATUS
K7EQG4;O00168	FXYD1	K7EQG4;O00168		Golgi	GOLGI APPARATUS
K7EQX8	MXRA7	K7EQX8			ER
K7ER00;Q9Y285	FARSA	K7ER00;Q9Y285	TRANSLATION	Translation	TRANSLATION
K7ER11;P24310	COX7A1	K7ER11;P24310		Lysosome	PEROXISOME
K7ER90	EIF3G	K7ER90	TRANSLATION		TRANSLATION
K7ERC8;Q06136	KDSR	K7ERC8;Q06136	ER	ER	ER
K7ERG2;Q9NYR9;Q9NYR9-2	NKIRAS2	K7ERG2;Q9NYR9;Q9NYR9-2		Protein Complex	ENDOSOME-VESICLE
K7ERG9;P00746	CFD	K7ERG9;P00746		Golgi	LD
K7ERI9;P02654	APOC1	K7ERI9;P02654		ER	NUCLEUS
K7ERU9;Q2NL98	ENSG00000267314;VMAC	K7ERU9;Q2NL98			CYTOPLASM
K7ES61;Q9BYD3	MRPL4	K7ES61;Q9BYD3	MITOCHONDRIA	Mitochondria	MITOCHONDRIA
K7ES70;P55083;P55083-2	MFAP4	K7ES70;P55083;P55083-2			LD
K7ESE6;Q9BUM1	G6PC3	K7ESE6;Q9BUM1		ER	GOLGI APPARATUS
K7ESP4;Q8WVC6	DCAKD	K7ESP4;Q8WVC6	ER	ER	ER
K7N7A0;Q9BUJ0	ABHD14A	K7N7A0;Q9BUJ0		Golgi	GOLGI APPARATUS
L0R6Q1	SLC35A4	L0R6Q1		Mitochondria	CYTOPLASM
L0R819	ASDURF	L0R819		Cytosol	TRANSLATION
L0R8F8	MIEF1	L0R8F8	MITOCHONDRIA	Mitochondria	MITOCHONDRIA
M0QWZ7;Q9NP81	SARS2	M0QWZ7;Q9NP81		Mitochondria	MITOCHONDRIA
M0QX74;M0QXN9;M0QXP3;M0QY77;M0R0B4;M0R228;M0R2G3;Q9BQD3	KXD1	M0QX74;M0QXN9;M0QXP3;M0QY77;M0R0B4;M0R228;M0R2G3;Q9BQD3			ER
M0QXF9;O15382	BCAT2	M0QXF9;O15382	MITOCHONDRIA	Mitochondria	MITOCHONDRIA
M0QXH1;M0R1H9;M0R3D4;Q9UI14	RABAC1	M0QXH1;M0R1H9;M0R3D4;Q9UI14			GOLGI APPARATUS
M0QXN1;M0QZ66;M0R122;P54852	EMP3	M0QXN1;M0QZ66;M0R122;P54852	PM	PM	ER
M0QXQ4	NUMBL	M0QXQ4			NUCLEUS
M0QXZ5;Q96B54	ZNF428	M0QXZ5;Q96B54		Cytosol	CYTOPLASM
M0QY01	EPS15L1	M0QY01			CYTOPLASM
M0QYZ2;M0R0N4;P53680	AP2S1	M0QYZ2;M0R0N4;P53680		LD	ENDOSOME-VESICLE
M0QZ12;Q96CP6;Q96CP6-2;Q96CP6-3	GRAMD1A	M0QZ12;Q96CP6;Q96CP6-2;Q96CP6-3		ER	ER
M0QZ22;Q5PRF9	SAMD4B	M0QZ22;Q5PRF9		Translation	TRANSLATION
M0QZ57;Q96K62	ZBTB45	M0QZ57;Q96K62			CYTOPLASM
M0QZC5;P62280	RPS11	M0QZC5;P62280	TRANSLATION	Translation	TRANSLATION
M0QZM1	HNRNPM	M0QZM1			nan
M0QZR4;Q92888;Q92888-2;Q92888-3	ARHGEF1	M0QZR4;Q92888;Q92888-2;Q92888-3	CYTOPLASM	Cytosol	CYTOPLASM
M0R0P8;Q13459	MYO9B	M0R0P8;Q13459	CYTOPLASM	Cytosol	CYTOPLASM
M0R0X1;P61018;P61018-2	RAB4B	M0R0X1;P61018;P61018-2	ENDOSOME-VESICLE	Endosome	ENDOSOME-VESICLE
M0R117;Q02543	RPL18A	M0R117;Q02543	TRANSLATION	Translation	TRANSLATION
M0R1G1;Q9NPR9	GPR108	M0R1G1;Q9NPR9	GOLGI APPARATUS	Golgi	GOLGI APPARATUS
M0R208;Q16740	CLPP	M0R208;Q16740	MITOCHONDRIA	Mitochondria	MITOCHONDRIA
M0R226;Q9BQ48	MRPL34	M0R226;Q9BQ48			MITOCHONDRIA
M0R2A0;Q5UCC4;Q5UCC4-2	EMC10	M0R2A0;Q5UCC4;Q5UCC4-2	ER	PM	ER
M0R2I2	BABAM1	M0R2I2			CYTOPLASM
M0R2S3;Q9BW85	YJU2	M0R2S3;Q9BW85			NUCLEUS
M0R2Z9;Q8IX01;Q8IX01-4	SUGP2	M0R2Z9;Q8IX01;Q8IX01-4		Nucleus	NUCLEUS
M0R344;Q9NRA0;Q9NRA0-2;Q9NRA0-5	SPHK2	M0R344;Q9NRA0;Q9NRA0-2;Q9NRA0-5		Cytosol	ER
O00115;O00115-2	DNASE2	O00115;O00115-2	LYSOSOME	Lysosome	LYSOSOME
O00116	AGPS	O00116	PEROXISOME	Peroxisome	PEROXISOME
O00142	TK2	O00142	MITOCHONDRIA	Mitochondria	MITOCHONDRIA
O00148	DDX39A	O00148	NUCLEUS	Nucleus	NUCLEUS
O00151	PDLIM1	O00151		Cytosol	CYTOPLASM
O00154;O00154-4;O00154-6;O00154-7	ACOT7	O00154;O00154-4;O00154-6;O00154-7	CYTOPLASM	Cytosol	CYTOPLASM
O00159-3	MYO1C	O00159-3		PM	ENDOSOME-VESICLE
O00161	SNAP23	O00161	PM	PM	PM
O00165	HAX1	O00165	MITOCHONDRIA	Mitochondria	MITOCHONDRIA
O00170	AIP	O00170	CYTOPLASM	Cytosol	CYTOPLASM
O00178	GTPBP1	O00178	CYTOPLASM	Cytosol	CYTOPLASM
O00186	STXBP3	O00186	PM	PM	ER
O00189	AP4M1	O00189			ENDOSOME-VESICLE
O00203-3	AP3B1	O00203-3	PROTEIN-COMPLEX	Protein Complex	PROTEIN-COMPLEX
O00214-2	LGALS8	O00214-2	PM	Cytosol	CYTOPLASM
O00217	NDUFS8	O00217	MITOCHONDRIA	Mitochondria	MITOCHONDRIA
O00221;Q7LC14	NFKBIE	O00221;Q7LC14		Cytosol	CYTOPLASM
O00231	PSMD11	O00231	PROTEIN-COMPLEX	Protein Complex	PROTEIN-COMPLEX
O00232	PSMD12	O00232	PROTEIN-COMPLEX	Protein Complex	PROTEIN-COMPLEX
O00244	ATOX1	O00244		Cytosol	CYTOPLASM
O00264	PGRMC1	O00264	ER	Endosome	ER
O00267;O00267-2	SUPT5H	O00267;O00267-2		Nucleus	CYTOPLASM
O00268	TAF4	O00268			NUCLEUS
O00273	DFFA	O00273	CYTOPLASM	Cytosol	CYTOPLASM
O00291	HIP1	O00291		PM	PEROXISOME
O00299	CLIC1	O00299	CYTOPLASM	Cytosol	CYTOPLASM
O00300	TNFRSF11B	O00300			NUCLEUS
O00303	EIF3F	O00303	TRANSLATION	Translation	TRANSLATION
O00308;O00308-2	WWP2	O00308;O00308-2		Golgi	ENDOSOME-VESICLE
O00330;O00330-3	PDHX	O00330;O00330-3	MITOCHONDRIA	Mitochondria	MITOCHONDRIA
O00339-2	MATN2	O00339-2			ER
O00391	QSOX1	O00391		Mitochondria	LD
O00399	DCTN6	O00399	PROTEIN-COMPLEX	Protein Complex	PROTEIN-COMPLEX
O00400	SLC33A1	O00400	ER	Endosome	GOLGI APPARATUS
O00401	WASL	O00401	CYTOPLASM	Cytosol	CYTOPLASM
O00410;O00410-3	IPO5	O00410;O00410-3		Cytosol	CYTOPLASM
O00411	POLRMT	O00411	MITOCHONDRIA	Mitochondria	MITOCHONDRIA
O00418	EEF2K	O00418			PROTEIN-COMPLEX
O00425	IGF2BP3	O00425		Endosome	TRANSLATION
O00429;O00429-2;O00429-3;O00429-4;O00429-5	DNM1L	O00429;O00429-2;O00429-3;O00429-4;O00429-5	CYTOPLASM	Cytosol	CYTOPLASM
O00442;O00442-2	RTCA	O00442;O00442-2		Cytosol	CYTOPLASM
O00443	PIK3C2A	O00443	PM	ER	ER
O00458	IFRD1	O00458			TRANSLATION
O00459	PIK3R2	O00459		Cytosol	CYTOPLASM
O00461	GOLIM4	O00461	GOLGI APPARATUS	Golgi	GOLGI APPARATUS
O00468;O00468-3;O00468-4;O00468-5;O00468-6;O00468-7	AGRN	O00468;O00468-3;O00468-4;O00468-5;O00468-6;O00468-7		Mitochondria	LD
O00469	PLOD2	O00469	ER	PM	ER
O00478;O00478-2	BTN3A3	O00478;O00478-2		PM	ER
O00479	HMGN4	O00479			NUCLEUS
O00483	NDUFA4	O00483		Mitochondria	MITOCHONDRIA
O00487	PSMD14	O00487	PROTEIN-COMPLEX	Protein Complex	PROTEIN-COMPLEX
O00499-2;O00499-6	BIN1	O00499-2;O00499-6	CYTOPLASM	Cytosol	CYTOPLASM
O00505	KPNA3	O00505	CYTOPLASM	Cytosol	CYTOPLASM
O00506;O00506-2;O00506-3	STK25	O00506;O00506-2;O00506-3		Cytosol	CYTOPLASM
O00534	VWA5A	O00534		Cytosol	CYTOPLASM
O00562;O00562-2	PITPNM1	O00562;O00562-2			PROTEIN-COMPLEX
O00566	MPHOSPH10	O00566		Mitochondria	NUCLEUS
O00567	NOP56	O00567	NUCLEUS	Nucleus	NUCLEUS
O00602	FCN1	O00602			ER
O00622	CCN1	O00622			GOLGI APPARATUS
O00625	PIR	O00625		Cytosol	CYTOPLASM
O00628;O00628-2	PEX7	O00628;O00628-2			CYTOPLASM
O00629	KPNA4	O00629		Cytosol	CYTOPLASM
O00635	TRIM38	O00635		Cytosol	CYTOPLASM
O00743;O00743-2;O00743-3	PPP6C	O00743;O00743-2;O00743-3		Cytosol	CYTOPLASM
O00748;O00748-4	CES2	O00748;O00748-4	ER	ER	ER
O00754;O00754-2	MAN2B1	O00754;O00754-2	LYSOSOME	Lysosome	LYSOSOME
O00763	ACACB	O00763	PROTEIN-COMPLEX	Protein Complex	PROTEIN-COMPLEX
O00764	PDXK	O00764		Cytosol	CYTOPLASM
O00767	SCD	O00767	ER	ER	ER
O14494	PLPP1	O14494	PM	PM	PM
O14494-2	PLPP1	O14494-2	PM		LYSOSOME
O14495	PLPP3	O14495		PM	GOLGI APPARATUS
O14498	ISLR	O14498		Endosome	LD
O14521;O14521-2	SDHD	O14521;O14521-2		Mitochondria	MITOCHONDRIA
O14523;O14523-2	C2CD2L	O14523;O14523-2		PM	ER
O14524;O14524-2	NEMP1	O14524;O14524-2			NUCLEUS
O14530;O14530-2	TXNDC9	O14530;O14530-2	PROTEIN-COMPLEX	Protein Complex	PROTEIN-COMPLEX
O14531	DPYSL4	O14531		Cytosol	CYTOPLASM
O14545	TRAFD1	O14545		Cytosol	CYTOPLASM
O14548	COX7A2L	O14548		Mitochondria	MITOCHONDRIA
O14558	HSPB6	O14558	CYTOPLASM	Cytosol	CYTOPLASM
O14561	NDUFAB1	O14561	MITOCHONDRIA	Mitochondria	MITOCHONDRIA
O14576;O14576-2;O14576-3;O14576-5	DYNC1I1	O14576;O14576-2;O14576-3;O14576-5			PROTEIN-COMPLEX
O14579	COPE	O14579		Cytosol	PROTEIN-COMPLEX
O14602	EIF1AY	O14602		Translation	TRANSLATION
O14613	CDC42EP2	O14613	CYTOPLASM	Cytosol	CYTOPLASM
O14617-5	AP3D1	O14617-5	PROTEIN-COMPLEX	Protein Complex	PROTEIN-COMPLEX
O14640;O14640-2;P54792;P54792-2	DVL1;DVL1;DVL1P1;DVL1P1	O14640;O14640-2;P54792;P54792-2			CYTOPLASM
O14641	DVL2	O14641		Cytosol	CYTOPLASM
O14646;O14646-2	CHD1	O14646;O14646-2			nan
O14647	CHD2	O14647	NUCLEUS	Nucleus	NUCLEUS
O14656	TOR1A	O14656	LD	ER	ER
O14657	TOR1B	O14657	LD	ER	ER
O14662-2	STX16	O14662-2	ENDOSOME-VESICLE	Endosome	ENDOSOME-VESICLE
O14672	ADAM10	O14672	ER	ER	ER
O14678	ABCD4	O14678			ER
O14681;O14681-3	EI24	O14681;O14681-3	ER	ER	ER
O14682;O14682-2	ENC1	O14682;O14682-2			LD
O14684	PTGES	O14684			nan
O14727;O14727-4	APAF1	O14727;O14727-4		Cytosol	LD
O14734	ACOT8	O14734	PEROXISOME	ER	PEROXISOME
[truncated: 5,801 more rows]

## Sheet: CCMPS Values
ProteinGroups	NN_PEROXISOME	NN_MITOCHONDRIA	NN_LD	NN_ENDOSOME-VESICLE	NN_GOLGI APPARATUS	NN_TRANSLATION	NN_ER	NN_PM	NN_NUCLEUS	NN_LYSOSOME	NN_CYTOPLASM	NN_PROTEIN-COMPLEX	CC_PEROXISOME	CC_MITOCHONDRIA	CC_LD	CC_ENDOSOME-VESICLE	CC_GOLGI APPARATUS	CC_TRANSLATION	CC_ER	CC_PM	CC_NUCLEUS	CC_LYSOSOME	CC_CYTOPLASM	CC_PROTEIN-COMPLEX
A0A024QZW4;Q9H1N7	0.00129515	0.00133693	0.00182517	0.00151454	0.979598	0.000743732	0.000285578	0.0093734	0.000482515	0.000700545	0.000835185	0.00200881	0	0	0	0	1	0	0	0	0	0	0	0
A0A024QZX5;A0A087X1N8;P35237	0.00349148	0.00652593	0.00638663	0.0481059	0.00282823	0.0128899	0.00261489	0.00777767	0.0442926	0.0595674	0.661797	0.143722	0	0	0	0	0	0	0	0	0	0	0.821578	0.178422
A0A024R1R8;Q9Y2S6	0.00209941	0.0047553	0.424439	0.0185565	0.00218554	0.014563	0.00268927	0.00293176	0.0705208	0.000728238	0.446822	0.00970872	0	0	0.450676	0	0	0	0	0	0.0748802	0	0.474443	0
A0A024R3M2;A0A1B0GUD6;A0A1B0GWG7;A0A2R8Y5X2;J3KNL5;Q3KR37;Q3KR37-2;Q3KR37-3;Q3KR37-4	0.00137037	0.00283896	0.00845282	0.0477519	0.697426	0.00669733	0.219213	0.00885553	0	0.00601391	0.00100618	0.000373552	0	0	0	0	0.760851	0	0.239149	0	0	0	0	0
A0A024R4E5;Q00341	0.00506743	0.0167787	0.0285904	0.0663249	0.0112547	0.617125	0.0307103	0.0110261	0.0115223	0.0215205	0.0104949	0.169585	0	0	0	0	0	0.784438	0	0	0	0	0	0.215562
A0A024R7E8;K7EMV4;K7EN05;K7EPC8;K7EQ44;P60002	NaN	NaN	NaN	NaN	NaN	NaN	NaN	NaN	NaN	NaN	NaN	NaN	NaN	NaN	NaN	NaN	NaN	NaN	NaN	NaN	NaN	NaN	NaN	NaN
A0A024R7P0;O14593;O14593-2;O14593-3	0.00789846	0.0051006	0.00370423	0	0.0180409	0.00429566	0.00244458	0.0156752	0.493472	0.0051429	0.377047	0.067179	0	0	0	0	0	0	0	0	0.566871	0	0.433129	0
A0A024R7W5;A0A087WY31;A0A087X0Q1;Q7Z739	0.0265348	0.00129155	0.0715589	0.103175	0.0133656	0.312524	0.108935	0.143779	0.016572	0.0879043	0.0936846	0.0206747	0	0	0.0995337	0.14351	0	0.4347	0	0.199988	0	0.122269	0	0
A0A024RA52;P25787	0.00369219	0.00566381	0.00386848	0.00438206	0.00754066	0.00582364	0.00365972	0.0039729	0.00484319	0.00350227	0.00893656	0.944115	0	0	0	0	0	0	0	0	0	0	0	1
A0A024RAC6;Q14241	0.00448146	0.0232495	0.133305	0.0300496	0.0072796	0.0788729	0.0418361	0.0185123	0.5972	0.0250277	0.00882736	0.0313585	0	0	0.1647	0	0	0.0974488	0	0	0.737851	0	0	0
A0A024RBG1;Q9NZJ9-2	0.00547762	0.0058338	0.00453704	0.00480234	0.00230983	0.00475241	0.00305209	0.00570374	0.0471839	0.00479735	0.887802	0.0237476	0	0	0	0	0	0	0	0	0	0	1	0
A0A024RCQ8;A0A0G2JHB6;A0A0G2JID8;A0A0G2JK02;A0A0G2JLL3;A2ABN7;G8JLL2;Q9UMR5;Q9UMR5-2;Q9UMR5-3	0.04935	0.093323	0.000729959	0.00309769	0.00350321	0.00464206	0.023647	0.0066546	0.0350768	0.775393	0.00269681	0.00188617	0	0.107426	0	0	0	0	0	0	0	0.892574	0	0
A0A024RCR6;A0A0G2JK23;P46379;P46379-2;P46379-3	0.00360717	0.00353111	0.0266254	0.0152431	0.00294401	0.00584991	0.00324079	0.00374312	0.00612193	0.0047485	0.618457	0.305888	0	0	0	0	0	0	0	0	0	0	0.669076	0.330924
A0A067XG54;Q8NB49;Q8NB49-2;Q8NB49-3;Q8NB49-4	0.00308403	8.94601e-05	0.00963595	0.720008	0.0296749	0.0618107	0.0126074	0.00904692	0.00953554	0.00413772	0.119148	0.0212222	0	0	0	1	0	0	0	0	0	0	0	0
A0A075B6E4;A0A0A6YYI5;E7EWF5;G5E9M7;G5E9M9;Q14135;Q14135-2;Q14135-4	0.00503269	0.00468202	0.00703921	0.00673321	0.00271353	0.00293307	0.0028753	0.0187315	0.00819232	0.00307261	0.929454	0.00854011	0	0	0	0	0	0	0	0	0	0	1	0
A0A075B6F9;Q9Y314	0.00220062	0.00639139	0.648922	0.0227316	0.00726244	0.00337891	0.00317512	0.00271792	0.0556843	0.000687144	0.236158	0.0106908	0	0	0.733179	0	0	0	0	0	0	0	0.266821	0
A0A075B6G3;A0A087WTU7;A0A087WV90;A0A5H1ZRP8;P11532;P11532-11;P11532-4	0.00132717	0.00706088	0.0674912	0.0675404	0.00858598	0.623282	0.00988217	0.0200591	0.183549	0.00148856	0.00633106	0.00340224	0	0	0	0	0	0.772506	0	0	0.227494	0	0	0
A0A075B6P0;Q330K2;Q330K2-2	0.0970014	0.834262	0.00560054	0.00398608	0.00452589	0.00287709	0.00314684	0.0114457	0.00861638	0.0131399	0.00611533	0.00928335	0	1	0	0	0	0	0	0	0	0	0	0
A0A075B6T4;Q9NVX7;Q9NVX7-2	0.00508777	0.00932594	0.0030039	0	0.10024	0.160043	0.000464542	0.133033	0.0191043	0.00278307	0.00238322	0.564532	0	0	0	0	0.104652	0.167086	0	0.138887	0	0	0	0.589375
A0A075B730;P58107	0.00857238	0.0845873	0.137144	0.0827181	0.0697719	0.127508	0.0105878	0.169513	0.159152	0.00254566	0.135728	0.0121703	0	0.0875532	0.141953	0.0856185	0.0722184	0.131979	0	0.175457	0.164733	0	0.140488	0
A0A075B749;A0A087WX83;Q5VU43-3	0.0663787	0.00692686	0.124419	0.0691678	0.00769855	0.0326223	0.00289299	0.0255737	0.047526	0.0149711	0.457161	0.144662	0	0	0.171319	0	0	0	0	0	0	0	0.629488	0.199193
A0A075B773;O00623	0.267054	0.00616421	0.00577063	0.00398403	0.308941	0.000718862	0.0162087	0.0326837	0.0196784	0.325223	0.00491657	0.00865697	0.296326	0	0	0	0.342804	0	0	0	0	0.36087	0	0
A0A075B784;Q9P275	0.0401699	0.00274435	0.00981769	0.00517613	0.348488	0.00327667	0.0048962	0.013967	0.552942	0.00394115	0.00393863	0.0106424	0	0	0	0	0.386595	0	0	0	0.613405	0	0	0
A0A075B7B1	0.00261121	0.000972167	0.00664015	0.483503	0.269378	0.0262893	0.135539	0.026455	0.020407	0.0218688	0.00257868	0.00375824	0	0	0	0.642204	0.357796	0	0	0	0	0	0	0
A0A075B7B7;Q8NHY3	0.0161383	0.111048	0.0839202	0.0278528	0.00437234	0.00492968	0.00335269	0.00274897	0.0697715	0.0757595	0.257266	0.34284	0	0.11806	0.0892194	0	0	0	0	0	0.0741772	0.0805434	0.273512	0.364489
A0A087WSV0;Q9HB09;Q9HB09-3	0.00440504	0.0221188	0.103944	0.00520328	0.0638402	0.00423439	0.000745531	0.00149351	0.199709	0.0381501	0.0687129	0.487443	0	0	0.121581	0	0.0746725	0	0	0	0.233595	0	0	0.570151
A0A087WSW9;A0A087WSY9;Q16881;Q16881-3;Q16881-4	0.00407552	0.00363839	0.0111086	0.0321224	0.00267175	0.015275	0.00337552	0.00800933	0.00880244	0.00873185	0.757862	0.144327	0	0	0	0	0	0	0	0	0	0	0.840026	0.159974
A0A087WT12;A0A087X2I2;P36969;P36969-2	0.00356569	0.079102	0.139937	0.0351885	0.00423028	0.0039199	0.00264899	0.0225521	0.126331	0.0444422	0.451146	0.0869353	0	0.0993099	0.175687	0	0	0	0	0	0.158605	0	0.566399	0
A0A087WT18;Q96A73;Q96A73-2	0.00613428	0.025576	0.0247066	0.00997773	0.00389717	0.00151945	0.00215843	0.111927	0.0243078	0.00305516	0.782882	0.00385888	0	0	0	0	0	0	0	0.125084	0	0	0.874916	0
A0A087WT20;Q9NV06	0.0328541	0.00319664	0.0367979	0.00321613	0.00561129	0.00785972	0.0764872	0.0944145	0.696105	0.032411	0.00668734	0.00435895	0	0	0	0	0	0	0	0.119433	0.880567	0	0	0
A0A087WT23;A0A087WV67;O00124;O00124-3	NaN	NaN	NaN	NaN	NaN	NaN	NaN	NaN	NaN	NaN	NaN	NaN	NaN	NaN	NaN	NaN	NaN	NaN	NaN	NaN	NaN	NaN	NaN	NaN
A0A087WT44	0.0206955	0.00441456	0.0154185	0.012898	0.0430143	0.00835112	0.773151	0.101632	0.00444538	0.0107898	0.00262891	0.00256176	0	0	0	0	0	0	0.883821	0.116179	0	0	0	0
A0A087WT64;Q07820	0.00209773	0.0294948	0.00916495	0.0106916	0.00768879	0.00422196	0.00143173	0.0825178	0.0244594	0.0154094	0.357893	0.454929	0	0	0	0	0	0	0	0	0	0	0.440309	0.559691
A0A087WT80;A0A087WW73;A0A0D9SF51;A0A0D9SG17;A0A1B0GWB6;Q9NQ66;Q9NQ66-2	0.0718285	0.178389	0.251762	0.0213142	0.011696	0.0689227	0.0133194	0.12293	0.2103	0.0318941	0.00719636	0.0104477	0	0.233683	0.329799	0	0	0	0	0.161033	0.275485	0	0	0
A0A087WT84;Q9H9V9;Q9H9V9-2	0.00304435	0.00858727	0.526256	0.00569774	0.00843309	0.00327946	0.00163011	0.00213622	0.119949	0.000854449	0.0242583	0.295874	0	0	0.558611	0	0	0	0	0	0.127324	0	0	0.314065
A0A087WT87;A0A087X0U3;P43003;P43003-2	0.012998	0.00464385	0.0128063	0.363614	0.100178	0.0647961	0.220919	0.150334	0.0241971	0.0414567	0.0033715	0.000684942	0	0	0	0.435443	0.119967	0	0.264559	0.180031	0	0	0	0
A0A087WT92;Q0VGL1	0.0383067	0.00783487	0.0273033	0.0610393	0.0349694	0.0463899	0.500035	0.162927	0.0224204	0.0754023	0.0121207	0.0112509	0	0	0	0	0	0	0.67722	0.22066	0	0.102121	0	0
A0A087WTA8;P08123	0.0557101	0.0194672	0.322654	0.0410414	0.00216007	0.00806301	0.0152392	0.024653	0.181387	0.0101892	0.0992182	0.220218	0	0	0.445495	0	0	0	0	0	0.250445	0	0	0.30406
A0A087WTP3;Q92945	0.00715874	0.00415846	0.0161024	0.00624131	0.00332591	0.00379108	0.00263396	0.0109671	0.136805	0.0101838	0.78925	0.00938243	0	0	0	0	0	0	0	0	0.147728	0	0.852272	0
A0A087WTT9;A0A087WX43;A0A096LNJ4;A0A1B0GVW6;D6RE84;Q9NP73;Q9NP73-2	0.0594716	0.0189217	0.03313	0.0211424	0.0146686	0.0598257	0.720175	0.0304924	0.00664934	0.0310727	0.00204557	0.00240484	0	0	0	0	0	0	1	0	0	0	0	0
A0A087WTU1;A0A087X0S7;A0A0B4J2G4;Q15345;Q15345-3	0.00376894	0.004457	0.0363096	0.00413947	0.00642578	0.0103945	0.00141415	0.00568757	0.479807	0.00796576	0.206924	0.232705	0	0	0	0	0	0	0	0	0.521849	0	0.225056	0.253095
A0A087WU02;Q96RQ1	0.000638591	0.00125412	0.008163	0.298199	0.353788	0.10203	0.211627	0.013403	0.00137307	0.00449377	0.00274298	0.00228688	0	0	0	0.308808	0.366375	0.10566	0.219157	0	0	0	0	0
A0A087WU07;Q5TGZ0	0.0140997	0.613832	0.00896187	0.00497483	0.016215	0.00427758	0.00224489	0.0267405	0.279269	0.0106021	0.00378663	0.0149957	0	0.687304	0	0	0	0	0	0	0.312696	0	0	0
A0A087WU53;Q9H0U3	0.0335396	0.00403428	0.00834321	0.00646132	0.019739	0.00800434	0.855324	0.0220318	0.00203284	0.0357609	0.00269643	0.00203214	0	0	0	0	0	0	1	0	0	0	0	0
A0A087WU65;A0A2R8YE10;Q9NRW7	0.00247992	8.67949e-07	0.0160602	0.715778	0.026833	0.117007	0.0120575	0.00430978	0.00091055	0.00107567	0.0840373	0.0194505	0	0	0	0.859499	0	0.140501	0	0	0	0	0	0
A0A087WU73;A0A087X287;A0A494BZX7;A0A499FIJ6;B0QY83;E7ER32;Q969V6;W0Z7M9	0.00652608	0.00464289	0.00944807	0.00374233	0.00456972	0.00182895	0.00252449	0.00459289	0.00671282	0.00167365	0.912234	0.0415038	0	0	0	0	0	0	0	0	0	0	1	0
A0A087WU78;A0A087WWC4;Q6T4R5;Q6T4R5-2;Q6T4R5-3;Q6T4R5-4	0.300456	0.0698942	0.0115874	0.00317392	0.0793443	0.008523	0.00677462	0.0267272	0.0899464	0.00739046	0.0178591	0.378324	0.327307	0.0761404	0	0	0.0864351	0	0	0	0.0979846	0	0	0.412133
A0A087WUB9;Q8WYA6;Q8WYA6-4	0.0247596	0.0689271	0.00893808	0.0124547	0.00408919	0.0053592	0.00818952	0.0901924	0.721787	0.0321357	0.0136782	0.00948956	0	0.0782456	0	0	0	0	0	0.102386	0.819368	0	0	0
A0A087WUC6;E9PI68;Q15005	0.0281343	0.00377091	0.00906636	0.00993264	0.0227643	0.0121967	0.867731	0.0185617	0.00240047	0.0205227	0.00263846	0.00228054	0	0	0	0	0	0	1	0	0	0	0	0
A0A087WUD3;Q9NRP0;Q9NRP0-2	0.031177	0.339887	0.243488	0.00925455	0.0143093	0.00366943	0.189752	0.02892	0.128674	6.03459e-05	0.00545471	0.00535238	0	0.477336	0.341954	0	0	0	0	0	0.18071	0	0	0
A0A087WUI6;Q8WXW3	0.0110801	0.023558	0.0144448	0.0739812	0.329313	0.00463395	0.00735063	0.0506115	0.305252	0.170291	0.0038521	0.00563148	0	0	0	0	0.409158	0	0	0	0.379263	0.211579	0	0
A0A087WUK2;O14979	0.00644957	0.00459567	0.0533633	0.115587	0.00895684	0.453226	0.0390538	0.0941251	0.181415	0.017319	0.0126745	0.0132346	0	0	0	0.136894	0	0.536773	0	0.111476	0.214856	0	0	0
A0A087WUQ6;P07203	0.316389	0.490261	0.0464495	0.000444844	0	0.00228852	0.00177632	0.00992422	0.0764585	0.0199587	0.0339903	0.00205948	0.358268	0.555154	0	0	0	0	0	0	0.0865789	0	0	0
A0A087WUT6;O60841	0.00203885	0.00727328	0.00539182	0.0667664	0.00867976	0.794842	0.0537851	0.00020089	0.00557552	0.00597318	0.00669035	0.0427828	0	0	0	0	0	1	0	0	0	0	0	0
A0A087WUW6;A0A087X0G7;A0A087X1B1;Q9Y6K9;Q9Y6K9-2	0.00748571	0.00578567	0.0134317	0.00565271	0.00656833	0.00173359	0.00239025	0.0648479	0.0121197	0.00188647	0.865728	0.0123699	0	0	0	0	0	0	0	0	0	0	1	0
A0A087WUW9;Q9NXU5	0.0284237	0.0239528	0.0746427	0.0228734	0.0251606	0.0340297	0.0157896	0.445333	0.236707	0.0248238	0.0311958	0.037067	0	0	0.0986445	0	0	0	0	0.588533	0.312822	0	0	0
A0A087WUZ7;Q9Y5W8;Q9Y5W8-2	0.00685446	0.00415538	0.0107738	0.0105894	0.0614589	0.0137903	0.834012	0.0423743	0.000550934	0.0114338	0.00275468	0.00125215	0	0	0	0	0.068633	0	0.931367	0	0	0	0	0
A0A087WV05;Q99417	0.00951607	0.00312144	0.0157968	0.0184838	0.00408558	0.0030147	0.00378995	0.0116823	0.00714951	0.0045192	0.906428	0.0124127	0	0	0	0	0	0	0	0	0	0	1	0
A0A087WV25;O95684;O95684-2	0.00268973	0.00239754	0.00366115	0.0871612	0.243849	0.0156197	0.000803813	0.00248642	0.0103879	0.00108591	0.545815	0.0840422	0	0	0	0.0994054	0.278105	0	0	0	0	0	0.62249	0
A0A087WV97;Q8WU79;Q8WU79-2;Q8WU79-3;X6RCC3	0.00317029	0.00324798	0.0252894	0.0432067	0.00314411	0.0146652	0.00275964	0.00480878	0.0178435	0.00326773	0.817605	0.0609913	0	0	0	0	0	0	0	0	0	0	1	0
A0A087WVA1;P62341;Q6IAK0	0.00314643	0.00122264	0.380087	0.00678457	0.202707	0.0076791	0.0558678	0.192656	0.146336	0.00314567	0	0.000368187	0	0	0.412338	0	0.219907	0	0	0.209002	0.158753	0	0	0
A0A087WVC4;A0A0A0MS54;P22694;P22694-2;P22694-3;P22694-4;P22694-5;P22694-6;P22694-7;P22694-9	0.0230171	0.00378919	0.0799122	0.205964	0.00360477	0.056647	0.0190758	0.0607512	0.0411114	0.0295039	0.295496	0.181127	0	0	0.104803	0.270117	0	0	0	0	0	0	0.387537	0.237544
A0A087WVD1	0	0.00309374	0.00588792	0.0415322	0.00873519	0.296458	0.000498653	0.000301113	0.0113228	0.00157055	0.127321	0.503279	0	0	0	0	0	0.370694	0	0	0	0	0	0.629306
A0A087WVF7;Q9NZM3;Q9NZM3-2;Q9NZM3-3;Q9NZM3-4	0.0603883	0.0203243	0.0912769	0.0305575	0.00439493	0.00224851	0.00640587	0.147454	0.0843832	0.0297931	0.458004	0.0647692	0	0	0.116854	0	0	0	0	0.188773	0.108029	0	0.586344	0
A0A087WVI1;Q96JY6;Q96JY6-5	0.10736	0.20864	0.0105138	0.0830653	0.00577991	0.00394967	0.00373743	0.0834352	0.0170443	0.00328087	0.460389	0.0128044	0.124917	0.242759	0	0.0966489	0	0	0	0	0	0	0.535676	0
A0A087WVM1;P78382;P78382-2;Q5W1L7	0.00252331	0.00423593	0.00121311	0.0120356	0.889595	0.00127824	0.00231167	0.046121	0.00434838	0.00132744	0.0011754	0.0338347	0	0	0	0	1	0	0	0	0	0	0	0
A0A087WVQ6;Q00610;Q00610-2	0.00524598	0.00148368	0.080557	0.194238	0.00518011	0.0306032	0.00800462	0.0184763	0.00625859	0.00648111	0.352341	0.291131	0	0	0.0877272	0.211527	0	0	0	0	0	0	0.383702	0.317044
A0A087WVS8;Q70IA6;Q70IA6-2;Q70IA6-3	0.0049926	0.00448888	0.00320129	0.00931706	0.00298433	0.00378288	0.00278218	0.00367503	0.00529148	0.00419487	0.883246	0.0720438	0	0	0	0	0	0	0	0	0	0	1	0
A0A087WVT6;A0A087X159;D6RAC5;P81877;P81877-2;P81877-3;P81877-4;P81877-5;Q9BWW4;Q9BWW4-2;Q9BWW4-3	0.0750229	0.0106127	0.188228	0.003775	0.00585991	0.00446549	0.0043537	0.0299669	0.660749	0.00448408	0.00618506	0.00629782	0	0	0.221712	0	0	0	0	0	0.778288	0	0	0
A0A087WW00;P51668	0.00256422	0.0282516	0.0836736	0.00177899	0.00953914	0.00314085	0.000839729	0.194093	0.11896	0.0113003	0.545859	0	0	0	0.0887704	0	0	0	0	0.205916	0.126206	0	0.579108	0
A0A087WW06;Q96AY4	0.00434305	0.00243986	0.0128205	0.133347	0.0030267	0.0565625	0.00114211	0.00291842	0.103148	0.0125724	0.372089	0.295592	0	0	0	0.147479	0	0	0	0	0.114079	0	0.411523	0.326919
A0A087WW59;Q7Z7L8	0.00508802	0.00472625	0.658627	0.00323835	0.00490718	0.00180009	0.00459317	0.00359289	0.0261687	0.000643896	0.282466	0.00414909	0	0	0.699853	0	0	0	0	0	0	0	0.300147	0
A0A087WWA3;O60333;O60333-2;O60333-4;Q4R9M9	0.0100979	0.00213214	0.172403	0.193803	0.00723434	0.253114	0.0635573	0.0748272	0.0366354	0.00769373	0.109138	0.0693634	0	0	0.278375	0.312928	0	0.408697	0	0	0	0	0	0
A0A087WWE7;E5RGR5;Q8N0T1;Q8N0T1-2	0.0047564	0.0115415	0.0091204	0.015567	0.0163772	0.0114473	0.0134033	0.0121461	0.0672117	0.108181	0.660285	0.0699631	0	0	0	0	0	0	0	0	0.0804278	0.129453	0.790119	0
A0A087WWF1;Q8WWX9	0.111563	0.0657858	0.0650061	0.00827357	0.0579277	0.033336	0.274882	0.199102	0.0335357	0.037342	0.0102729	0.102974	0.157295	0.0927527	0	0	0.0816735	0	0.387561	0.280718	0	0	0	0
A0A087WWF6;F8W8R3;H7C1B3;P49005	0.00242756	0.0224117	0.528095	0.00260826	0.0542876	0.00256723	0.00324127	0.00465204	0.0190575	0.000658578	0.193816	0.166178	0	0	0.560386	0	0.0576072	0	0	0	0	0	0.205667	0.176339
A0A087WWG3;A0A087X140;A0A0A0MRU4;A0A0A6YYH9;C9J3G2;Q5JTY5;Q5JTY5-2;Q5RIA9;Q5RIA9-3;Q5RIB0;Q8IUF1;Q9BRT8;Q9BRT8-3	0.00366725	0.00621408	0.0450292	0.00348704	0.00296082	0.0183126	0.00126648	0.00256957	0.143269	0.00236016	0.722587	0.0482775	0	0	0	0	0	0	0	0	0.165465	0	0.834535	0
A0A087WWH3;Q9NZM4;Q9NZM4-2	0.172193	0.00470806	0.03722	0.00315785	0.0178586	0.00592544	0.00395282	0.0528156	0.682531	0.0086182	0.00386647	0.00715332	0.20146	0	0	0	0	0	0	0	0.79854	0	0	0
A0A087WWM0;O43617	0.00363153	0.00216572	0.00899754	0.025446	0.00437856	0.00412617	0.00316424	0.00523081	0.0065288	0.00293609	0.731073	0.202322	0	0	0	0	0	0	0	0	0	0	0.783241	0.216759
A0A087WWM4;H0YNJ6;Q9P2T1;Q9P2T1-2	0.00558972	0.00330989	0.00619506	0.0272121	0.0044399	0.0198088	0.00361677	0.0047588	0.00475528	0.00725229	0.430257	0.482804	0	0	0	0	0	0	0	0	0	0	0.471225	0.528775
A0A087WWM6;E7EQL6;O43272;O43272-1;O43272-2	0.090685	0.838565	0.00665972	0.00353781	0.0066939	0.0024955	0.00331562	0.0146599	0.00474008	0.014827	0.0045554	0.00926466	0	1	0	0	0	0	0	0	0	0	0	0
A0A087WWP4;A0A494C001;A0A499FJY3;Q96T37;Q96T37-2;Q96T37-3;Q96T37-4	0.0119703	0.00598283	0.0280676	0.00719438	0.0386554	0.0194025	0.0843799	0.206081	0.524109	0.0638979	0.00366258	0.00659698	0	0	0	0	0	0	0	0.282229	0.717771	0	0	0
A0A087WWQ2;Q92979;V9GYP5	0.0604936	0.00517012	0.00768596	0.0436131	0.00689281	0.0283826	0.0244461	0.0613943	0.671129	0.0712595	0.00461379	0.0149196	0	0	0	0	0	0	0	0	1	0	0	0
A0A087WWS1;Q96FV9	0.116135	0.00536516	0.0365123	0.0229668	0.168012	0.0716414	0.237703	0.26512	0.0137215	0.039354	0.00128742	0.022181	0.147573	0	0	0	0.213492	0	0.302048	0.336887	0	0	0	0
A0A087WWW9;O95999	0.00548986	0.00702967	0.00632977	0.00746204	0.00494491	0.00276937	0.00428786	0.022701	0.0260176	0.00489658	0.903429	0.0046421	0	0	0	0	0	0	0	0	0	0	1	0
A0A087WX11;J3KNG8;Q8TF40;Q8TF40-3	0.00775562	0.00226159	0.0176156	0.00283311	0.52875	0.000265658	0.00246479	0.00450179	0.00709841	0.00280096	0.00340586	0.420246	0	0	0	0	0.557168	0	0	0	0	0	0	0.442832
A0A087WX19;A0A087WX45;C9J5R6	0.0693035	0.868818	0.00456846	0.00286188	0.0026557	0.00325173	0.00528903	0.00739148	0.00703116	0.0163388	0.00504162	0.00744882	0	1	0	0	0	0	0	0	0	0	0	0
A0A087WX23	0.0102331	0.0033742	0.0764182	0.183401	0.00266328	0.319675	0.0197956	0.0759391	0.0445265	0.0245573	0.185807	0.0536095	0	0	0.0998537	0.239646	0	0.417711	0	0	0	0	0.242789	0
A0A087WX48;Q8IUX4;Q96AK3	0.00113224	0.00107833	0.212721	0.0728152	0.0381165	0.474676	0.114837	0.0289775	0.028589	0.0231584	0.00294936	0.000949962	0	0	0.309459	0	0	0.690541	0	0	0	0	0	0
A0A087WXB0;O15126	0.000938888	0.133068	0.004766	0.59818	0.0278069	0.107972	0.00532834	0.00959457	0.0348057	0.0587844	0.00387283	0.0148818	0	0.158562	0	0.712781	0	0.128657	0	0	0	0	0	0
A0A087WXC5;E7ESZ7;O95299	0.145522	0.678745	0.0067896	0.00407162	0.00179841	0.00514434	0.0777475	0.0121298	0.0100591	0.0478121	0.00468665	0.00549379	0.176547	0.823453	0	0	0	0	0	0	0	0	0	0
A0A087WXD1;Q96T83	0.0110473	0.00454671	0.00764202	0.712178	0.0304986	0.0903867	0.0339275	0.0367054	0.0247452	0.0270699	0.00356313	0.0176891	0	0	0	0.887378	0	0.112622	0	0	0	0	0	0
A0A087WXE9;Q6UXH9	0.00206592	0.0177932	0.620233	0.00267374	0.113297	0.00170871	0.00407975	0.0973351	0.130177	0	0.00568434	0.00495162	0	0	0.645375	0	0.11789	0	0	0.101281	0.135454	0	0	0
A0A087WXF8;A0A0D9SEW3;Q9NP64;Q9NP64-2;Q9NP64-3	0.00334911	0.0124441	0.00368425	0.0119114	0.0254202	0.390906	0.0430188	0.0665732	0.130294	0.130224	0.00107853	0.181097	0	0	0	0	0	0.469545	0	0	0.156506	0.156421	0	0.217528
A0A087WXK4;Q7Z3F1	0.0117608	0.00203924	0.01884	0.0440035	0.0969783	0.00574595	0.455863	0.0705287	0.00350466	0.287885	0.00285098	0	0	0	0	0	0.115351	0	0.542225	0	0	0.342424	0	0
A0A087WXL6;B7Z879;Q9H270	0.0187414	0.00206101	0.149259	0.214702	0.0153614	0.110167	0.0952648	0.1344	0.00498282	0.0186406	0.109368	0.127052	0	0	0.202913	0.291881	0	0.149769	0	0.182713	0	0	0	0.172724
A0A087WXM6;A0A0A6YYL6;J3KRX5;J3QQT2;P18621;P18621-3	0.00233941	0.00381358	0.0064884	0.014964	0.0077304	0.90854	0.012153	0.00424682	0.012776	0.00687891	0.00566481	0.0144052	0	0	0	0	0	1	0	0	0	0	0	0
A0A087WXN9;Q765P7	0.00416492	0.00412091	0.024381	0.00911255	0.00394388	0.00288145	0.0027896	0.0170294	0.00447787	0.00292452	0.904083	0.0200908	0	0	0	0	0	0	0	0	0	0	1	0
A0A087WXP3;E9PEE8;P18564;P18564-2	0.160954	0.00495248	0.182286	0.00178345	0.047731	0.00348148	0.378953	0.105151	0.10668	0.00629541	0.000803576	0.000928449	0.163945	0	0.185673	0	0.048618	0	0.385996	0.107105	0.108663	0	0	0
A0A087WXR7;A0A087WZJ6;A0A2R8Y459;A0A2R8Y4S2;A0A2R8Y687;A0A2R8Y6M7;A0A2R8Y6Q6;A0A2R8Y6Y1;A0A2R8Y761;A0A2R8Y7Q3;A0A2R8Y7R8;A0A2R8Y883;A0A2R8YCJ4;A0A2R8YCP1;A0A2R8YCX2;A0A2R8YE60;A0A2R8YEC1;A0A2R8YEH2;A0A2R8YGP2;Q5TBB1;Q5TBB1-2	0.00106903	0.00387918	0.00591	0.0101259	0.00265165	0.148521	0.0021472	0.0329132	0.0498788	0.00215971	0.55765	0.183095	0	0	0	0	0	0.167015	0	0	0	0	0.62709	0.205894
A0A087WXU0;Q9NWS8	0.10673	0.819316	0.00721482	0.00428837	0.00237384	0.00373359	0.00734832	0.00905969	0.00494406	0.0215536	0.00537793	0.00805959	0.115254	0.884746	0	0	0	0	0	0	0	0	0	0
A0A087WXX3;Q8N196	0.00714862	0.00406879	0.00758029	0.00191212	0.00536856	0.00164688	0.0022424	0.172155	0.182952	0.00184877	0.610196	0.00288032	0	0	0	0	0	0	0	0.178343	0.189528	0	0.632129	0
A0A087WY35;O95965	0.00156115	0.244326	0.674365	0.0045241	0.0140796	0.00211994	0.00301252	0.00226696	0.0122413	0.0328528	0.00462189	0.00402878	0	0.26595	0.73405	0	0	0	0	0	0	0	0	0
A0A087WY55;Q9NP79	0.00502272	0.0026745	0.0190849	0.0162559	0.00341931	0.00333208	0.00295163	0.00480979	0.0128886	0.00353452	0.806306	0.11972	0	0	0	0	0	0	0	0	0	0	1	0
A0A087WY62	0.0887183	0.000930208	0.00644395	0.00617766	0.155044	0.0261661	0.0875768	0.0325161	0.0423604	0.546916	0.00446425	0.00268599	0	0	0	0	0.220874	0	0	0	0	0.779126	0	0
A0A087WY71;Q96CW1;Q96CW1-2	0.0179808	0.0026217	0.131348	0.25394	0.0123725	0.149913	0.0546024	0.103327	0.0175216	0.0540859	0.07258	0.129708	0	0	0.170973	0.33055	0	0.195139	0	0.134499	0	0	0	0.168839
A0A087WYD6;A0A0G2JLV0;Q03519;X5CMH5	0.0102458	0.00527025	0.0145764	0.00967863	0.0193421	0.0203481	0.857521	0.0229645	0.0025929	0.0330028	0.00271734	0.00174067	0	0	0	0	0	0	1	0	0	0	0	0
A0A087WYF7;Q6UXV4	0.0679452	0.636145	0.0069146	0.0216607	0.00242598	0.00349615	0.00668919	0.00707493	0.0419219	0.0169191	0.180866	0.00794167	0	0.778625	0	0	0	0	0	0	0	0	0.221375	0
A0A087WYL5;Q6UXD5-3;Q6UXD5-5	0	0.000432523	0.00989462	0.67113	0.0223059	0.0492844	0.00123664	0.00486447	0.00190262	0	0.00732765	0.231621	0	0	0	0.743427	0	0	0	0	0	0	0	0.256573
A0A087WYN9;Q7Z478	0.00519639	0.00272742	0.0135951	0.0221862	0.025811	0.34081	0.413475	0.0418974	0.0152839	0.111546	0.00461097	0.00286131	0	0	0	0	0	0.393622	0.477547	0	0	0.128831	0	0
A0A087WYR0;P09132	0.00272814	0.00143693	0.0294527	0.0771983	0.0121574	0.114526	0.00839303	0.00730918	0.0017676	0.00539038	0.301444	0.438196	0	0	0	0	0	0.134079	0	0	0	0	0.352911	0.51301
A0A087WYS1;E7EUC7;Q16851	0.00431837	0.00558945	0.0045382	0.00667556	0.00594517	0.00345643	0.00338429	0.00280265	0.00467207	0.00288823	0.0863735	0.869356	0	0	0	0	0	0	0	0	0	0	0	1
A0A087WYT3;Q15185;Q15185-4	0.00535736	0.00423333	0.0136263	0.01183	0.00273268	0.0045715	0.00322246	0.00642322	0.00692132	0.00314305	0.911589	0.0263496	0	0	0	0	0	0	0	0	0	0	1	0
A0A087WYY0;A0A087X260;B1AKP7;G3V162;Q13148	0.0581615	0.00891577	0.0687361	0.0187898	0.000587925	0.0786784	0.00617207	0.0843212	0.463552	0.0296375	0.154318	0.0281301	0	0	0	0	0	0.112955	0	0	0.665498	0	0.221547	0
A0A087WZ13;E9PAU2;Q8IY67-2	0.0217113	0.0391373	0.122627	0.120452	0.00522911	0.179781	0.119066	0.119896	0.09852	0.0276324	0.117251	0.0286964	0	0.0575199	0.180224	0.177028	0	0.264224	0	0.176211	0.144794	0	0	0
A0A087WZ50;Q8TCT7;Q8TCT7-2;Q8TCT7-4	0.0325328	0.00400984	0.0665648	0.024601	0.204185	0.0109132	0.529157	0.0982796	0.00353603	0.00826652	0.00266356	0.0152912	0	0	0	0	0.245526	0	0.636296	0.118178	0	0	0	0
A0A087WZ62;Q9H6U8;Q9H6U8-3	0.00837391	0.00259166	0.00642941	0.00708189	0.0842848	0.00693269	0.753275	0.0344065	0.000835186	0.0920433	0.00263286	0.00111296	0	0	0	0	0.0906675	0	0.810319	0	0	0.0990136	0	0
A0A087WZ97;A0A087X2C2;Q5T7M9	0.00569266	0.00235864	0.00321332	0.0103177	0.757839	0.00234495	0.200145	0.0143035	0.000296598	0.000424424	0.0013041	0.00176062	0	0	0	0	0.791077	0	0.208923	0	0	0	0	0
A0A087WZC1;Q6IN84;Q6IN84-2	0.0835444	0.663964	0.0111741	0.00546219	0.0226955	0.000832518	0.00357205	0.0262668	0.154449	0.00612187	0.00879318	0.0131234	0	0.811282	0	0	0	0	0	0	0.188718	0	0	0
A0A087WZE9	0.00994883	0.0127628	0.152542	0.0313884	0.00477573	0.0237398	0.00564847	0.0194006	0.650338	0.0124615	0.0539805	0.0230132	0	0	0.189993	0	0	0	0	0	0.810007	0	0	0
A0A087WZG4;A0A3B3IPE9;A0A590UK10;Q6ZSZ5;Q6ZSZ5-1;Q6ZSZ5-2;Q6ZSZ5-5;Q6ZSZ5-6	0.126553	0.0290583	0.451173	0.00254581	0.015996	0.0130317	0.200476	0.02439	0.115962	0.0130971	0.00304395	0.00467293	0.141532	0	0.504575	0	0	0	0.224205	0	0.129687	0	0	0
A0A087WZJ5;A0A087X1E1;A0A2R8Y760;A8MWQ5;E9PNV9;Q9BXS0;Q9BXS0-2;Q9BXS0-3	0.185027	0.0208455	0.0230393	0.00983458	0.0839844	0.00205734	0.0026037	0.169826	0.134565	0.0106086	0.261213	0.0963955	0.221691	0	0	0	0.100626	0	0	0.203478	0.16123	0	0.312974	0
A0A087WZK9;B3KS98;O15372	0.00156942	0.0038281	0.00881943	0.0988161	0.0254326	0.788032	0.00437379	0.00315728	0.00523179	0.00543493	0.00791716	0.0473878	0	0	0	0.111424	0	0.888576	0	0	0	0	0	0
A0A087WZN1;O43837	0.0353456	0.902956	0.00605692	0.00410612	0.00244112	0.00341239	0.00571599	0.0079943	0.00603439	0.0108639	0.00635868	0.00871417	0	1	0	0	0	0	0	0	0	0	0	0
A0A087WZQ7;Q9H115	0.0608096	0.0136862	0.00374917	0.34838	0.168693	0.373238	0.000115558	0.00693308	0.0152709	0.000572124	0.00552677	0.00302658	0	0	0	0.391302	0.189476	0.419222	0	0	0	0	0	0
A0A087WZT2;Q6UX53	0.0452638	0.00356693	0.0697243	0.0199474	0.300584	0.000665357	0.435077	0.103255	0.00390711	0.00895293	0.00256926	0.00648718	0	0	0.0767348	0	0.330806	0	0.478823	0.113637	0	0	0	0
A0A087WZT3;Q9H3K6	0.00650368	0.0224326	0.0213395	0.0075458	0.0027558	0.00333681	0.00188794	0.00474376	0.0312035	0.00307757	0.876515	0.0186579	0	0	0	0	0	0	0	0	0	0	1	0
A0A087WZU2;Q00536;Q00536-2;Q00536-3	0.00188535	0.00208134	0.0163326	0.0437026	0.00625721	0.278817	0.00188677	0.00255552	0.0341371	0.00210408	0.586954	0.0232873	0	0	0	0	0	0.322045	0	0	0	0	0.677955	0
A0A087WZU5;O43657	0.229909	0.216762	0.00301671	0.00657937	0.0019415	0.00550845	0.0824703	0.00745964	0.014716	0.426148	0.00277366	0.00271604	0.26341	0.248347	0	0	0	0	0	0	0	0.488243	0	0
A0A087WZV0;O43314;O43314-2	0.000340944	0.00290379	0.0785709	0.00720345	0.00256855	0.0585018	0.000795859	0.000835567	0.0518973	0.0015641	0.618657	0.176161	0	0	0.0899609	0	0	0	0	0	0	0	0.708341	0.201698
A0A087WZY2;A6NIV2;Q9P0U1	0.00514716	0.23397	0.632346	0.00241244	0.00860787	0.00191846	0.00313344	0.00256788	0.0960404	0.00158187	0.00743195	0.00484264	0	0.243122	0.657081	0	0	0	0	0	0.0997972	0	0	0
A0A087X011;E9PES4;J3KPF9;Q9Y496	0.0025539	0.0045169	0.0512921	0.013383	0.00329955	0.211733	0.00823036	0.00204438	0.00488786	0.00141048	0.47969	0.216959	0	0	0	0	0	0.233088	0	0	0	0	0.528071	0.238841
A0A087X020;Q9Y3A5	0.00397864	0.00667706	0.00374727	0.141562	0.00415581	0.60215	0.0013068	0.000933724	0.00462045	0.00299899	0.211195	0.0166747	0	0	0	0.148246	0	0.630585	0	0	0	0	0.221168	0
A0A087X043;O43424;O43424-2	0.00707559	0.00105388	0.0166331	0.579329	0.0847493	0.0497164	0.103741	0.0960898	0.024067	0.0261316	0.00460582	0.00680696	0	0	0	0.762107	0.111488	0	0	0.126406	0	0	0	0
A0A087X091	0.00399313	0.00486261	0.0127605	0.0578134	0.00340288	0.104857	0.0233828	0.00450993	0.00507408	0.0111614	0.659929	0.108253	0	0	0	0	0	0.137107	0	0	0	0	0.862893	0
A0A087X0B7;H7C3C7;Q5SQN1;Q5SQN1-2;U3KPT7	0.000172733	0	0.0123574	0.471162	0.141314	0.233235	0.132568	0.00458165	0	0.000103321	0.00312297	0.00138308	0	0	0	0.55712	0.167095	0.275786	0	0	0	0	0	0
A0A087X0F1;Q9UK61;Q9UK61-2;Q9UK61-3;Q9UK61-4	0.019851	0.0150526	0.0120043	0.00485795	0.00428987	0.00418557	0.00339572	0.0369886	0.873647	0.010691	0.004055	0.0109813	0	0	0	0	0	0	0	0	1	0	0	0
A0A087X0H9;Q5T8P6	0.010233	0.0108156	0.0161963	0.048062	0.00494409	0.10874	0.00364355	0.0321666	0.578301	0.0263675	0.117093	0.043437	0	0	0	0	0	0.158273	0	0	0.841727	0	0	0
A0A087X0K0;P39059	0.0990475	0.0314385	0.586769	0.00182152	0.00513965	0.00540553	0.0451962	0.113342	0.0773754	0.029614	0.00173644	0.00311426	0	0.0388646	0.725369	0	0	0	0	0.140114	0.0956521	0	0	0
A0A087X0L7;E7EVY0;J3KNA0;Q15070;Q15070-2	0.154624	0.756105	0.00528212	0.00376501	0.00171843	0.00376912	0.00571551	0.00821099	0.00470846	0.0413064	0.00871426	0.00608079	0.169781	0.830219	0	0	0	0	0	0	0	0	0	0
A0A087X0M4;Q9BWU0	0.0110893	0.00534594	0.056007	0.00760752	0.00314444	0.00442975	0.0011275	0.0616899	0.703521	0.0216224	0.108326	0.0160885	0	0	0	0	0	0	0	0	1	0	0	0
A0A087X0P0;Q02224;Q02224-3	0.00835795	0.00617055	0.0056942	0.00990789	0.00411879	0.00278504	0.0033074	0.00391961	0.0135587	0.00460248	0.534262	0.403315	0	0	0	0	0	0	0	0	0	0	0.569833	0.430167
A0A087X0P9;I3L4S1;Q96CW6	0.0101518	0.00271713	0.0111001	0.00115627	0.00699662	0.000100301	0.00359602	0.00300473	0.0260844	0.00564335	0.522952	0.406497	0	0	0	0	0	0	0	0	0	0	0.562647	0.437353
A0A087X0Q9;Q9BVL4	0.0225475	0.145308	0.0725114	0.00144435	0.00699422	0.00162776	0.000624602	0.0159074	0.290454	0.0373088	0.376729	0.0285431	0	0.16419	0.0819336	0	0	0	0	0	0.328196	0	0.425681	0
A0A087X0R6;Q9UMY4;Q9UMY4-1	0.00415424	0.00371695	0.00774307	0.0129052	0.00305191	0.00546809	0.00312746	0.0068841	0.010417	0.00291963	0.93019	0.00942201	0	0	0	0	0	0	0	0	0	0	1	0
A0A087X0V4;A8K0B5;D3DPQ2;Q8IWT0	0.00111822	0.00958728	0.00965799	0.00975754	0.0024896	0.0238732	0.00269987	0.0141148	0.0834374	0.00195112	0.77966	0.0616528	0	0	0	0	0	0	0	0	0.096672	0	0.903328	0
A0A087X0W9;Q8N6M0	0.0014299	0.00370098	0.00692563	0.00408576	0.0078603	0.187585	0.00323944	0.000624055	0.00179887	0.00335516	0.0565843	0.72281	0	0	0	0	0	0.206048	0	0	0	0	0	0.793952
A0A087X0X3;P52272;P52272-2	0.00930314	0.00118752	0.0765064	0.0485419	0.00528066	0.317298	0.0520851	0.0714237	0.320419	0.0375636	0.0284833	0.031908	0	0	0.107118	0	0	0.444256	0	0	0.448625	0	0	0
A0A087X117;A0A0G2JN29;Q15155	0.296513	0.146868	0.00429911	0.000569471	0.0857219	0.00452644	0.239623	0.000626466	0.114233	0.0950478	0.00573499	0.00623674	0.303181	0.150171	0	0	0.0876496	0	0.245011	0	0.116801	0.0971852	0	0
A0A087X165;Q9C0H9	0.0340132	0.0487128	0.195551	0.0232025	0.0241623	0.0376144	0.272685	0.208652	0.0862125	0.0444291	0.0136712	0.0110945	0	0.060005	0.240881	0	0	0	0.335896	0.25702	0.106197	0	0	0
A0A087X1A8;A0A2R8Y3X7;D3VVH9;F5H211;G3V3R7;P54252;P54252-1;P54252-4	0.00366925	0.00386212	0.0332004	0.00818359	0.00393882	0.00407065	0.00181203	0.00409308	0.0235688	0.00271462	0.897867	0.0130201	0	0	0	0	0	0	0	0	0	0	1	0
A0A087X1B2;Q53GS9	0.0198898	0.0106937	0.0344317	0.00745885	0.0040016	0.271264	0.0360742	0.0944009	0.427543	0.0842043	0.00407016	0.00596738	0	0	0	0	0	0.309164	0	0.10759	0.487277	0.0959689	0	0
A0A087X1E4;P53365;P53365-3	0.00295326	0.00371438	0.00744156	0.0166288	0.00647769	0.00348313	0.00263752	0.00473687	0.00923859	0.00235974	0.860131	0.0801973	0	0	0	0	0	0	0	0	0	0	1	0
A0A087X1G7;O60613	NaN	NaN	NaN	NaN	NaN	NaN	NaN	NaN	NaN	NaN	NaN	NaN	NaN	NaN	NaN	NaN	NaN	NaN	NaN	NaN	NaN	NaN	NaN	NaN
A0A087X1K1;A0A087X1Z5;Q96C00	0.00421594	0.00493134	0.0040818	0.00705539	0.00364782	0.00518568	0.0029301	0.00353216	0.0044774	0.00322493	0.878168	0.0785492	0	0	0	0	0	0	0	0	0	0	1	0
A0A087X1N0;Q9H3C7	0.35657	0.00779529	0.0115825	0.00146579	0.01685	0.0186263	0	0.00245558	0.120566	0.0133393	0.00491297	0.445837	0.386328	0	0	0	0	0	0	0	0.130628	0	0	0.483045
A0A087X1U1;E7EUN2;F5GXM9;Q9UPQ3;Q9UPQ3-2	0.000226655	0.00187113	0.0137897	0.133335	0.055989	0.442168	0.000748167	0.00990504	0.00839791	0.000547295	0.00240326	0.330618	0	0	0	0.138586	0.058194	0.459582	0	0	0	0	0	0.343639
A0A087X1U5;F5H7T0;F6RJM5;Q96S38;Q96S38-2	0.00110146	0	0.0292755	0.574693	0.220775	0.0518091	0.00339937	0.0733277	8.4584e-05	0.0060498	0.0258931	0.0135915	0	0	0	0.722459	0.277541	0	0	0	0	0	0	0
A0A087X1Z1;A0A0G2JPW5;A0A0G2JQX1;A0A0G2JSA7;Q96RT8;Q96RT8-2	0.00230143	0.00510208	0.00767228	0.0414873	0.0145377	0.823319	0.0003566	0.000536582	0.00569861	0.0036652	0.00553333	0.0897903	0	0	0	0	0	1	0	0	0	0	0	0
A0A087X1Z3;Q9UL46	0.00472319	0.00340176	0.00535187	0.0136087	0.00411357	0.00258418	0.00267102	0.00395436	0.0156952	0.00318834	0.77693	0.163778	0	0	0	0	0	0	0	0	0	0	0.825899	0.174101
A0A087X211;Q8TCG1	0.0018272	0.00558489	0.00355219	0.00175027	0.01281	0.00607356	0.00526548	0.0446549	0.0218387	0.00319894	0.00452349	0.88892	0	0	0	0	0	0	0	0	0	0	0	1
A0A087X256;Q2M389	0.00337351	0.00210847	0.0817332	0.329943	0.0163819	0.0107427	0.00683035	0.0159573	0.00252726	0.00381726	0.0806665	0.445918	0	0	0.0953052	0.384731	0	0	0	0	0	0	0	0.519964
A0A087X266;Q9BXJ8	0.0155459	0.0125815	0.0160222	0.0126685	0.0358197	0.0797833	0.721886	0.0630249	0.00267345	0.0357761	0.00302266	0.001196	0	0	0	0	0	0.0995215	0.900478	0	0	0	0	0
A0A087X279;P09913	0.0431117	0.0983296	0.0461377	0.0138292	0.18768	0.0364054	0.00851325	0.0676423	0.0190493	0.00280047	0.336938	0.139563	0	0.128955	0	0	0.246134	0	0	0	0	0	0.44188	0.183031
A0A087X295;Q9NNW5	0.00361048	0.00159325	0.0202596	0.0280188	0.0111241	0.315778	0.00291643	0.00504429	0.187236	0.00985056	0.0763337	0.338235	0	0	0	0	0	0.375368	0	0	0.222569	0	0	0.402063
A0A087X296;P23219;P23219-2;P23219-3;P23219-5;P23219-6	0.124061	0.00474712	0.0836715	0.00547396	0.00940351	0.0260309	0.590413	0.100262	0.0173787	0.0338946	0.00258858	0.00207446	0.13809	0	0.0931331	0	0	0	0.657177	0.1116	0	0	0	0
A0A087X2B2;E9PMH5;Q13490;Q13490-2	0.00441107	0.00477246	0.0169936	0.0205709	0.0432939	0.00222704	0.000706093	0.0108446	0.0198607	0.00644431	0.494657	0.375218	0	0	0	0	0	0	0	0	0	0	0.568653	0.431347
A0A087X2D5;Q9BRJ2	0.257991	0.457435	0.00893947	0.00162396	0.00190105	0.0059498	0.00876923	0.0138468	0.0534006	0.17805	0.00474224	0.00734997	0.288749	0.511972	0	0	0	0	0	0	0	0.199278	0	0
A0A087X2I1;P62333	0.00451789	0.00591869	0.0037905	0.00762377	0.00743513	0.00611479	0.00400728	0.00486739	0.00619595	0.00392055	0.00794327	0.937665	0	0	0	0	0	0	0	0	0	0	0	1
A0A088AWN2;Q8TBZ3;Q8TBZ3-2;Q8TBZ3-4;Q8TBZ3-5;Q8TBZ3-6;Q8TBZ3-7	0.00496082	0.0322922	0.0232373	0.366379	0.132491	0.141982	0.048587	0.143677	0.0258412	0.0561014	0.0144871	0.00996428	0	0.039534	0	0.448542	0.162203	0.173823	0	0.175898	0	0	0	0
A0A088AWN3;A0A0A0MSY4;Q9BZ29;Q9BZ29-3;Q9BZ29-4;Q9BZ29-5	0.00291011	0.0110572	0.00458917	0.00868768	0.0243101	0.0642458	0.00301777	0.00083416	0.107845	0.00512003	0.00997164	0.757411	0	0	0	0	0	0	0	0	0.124639	0	0	0.875361
A0A088AWP5;Q8WUY3;Q8WUY3-2;Q8WUY3-3;Q8WUY3-4	0.000890162	0.0088515	0.00961868	0.181343	0.00568181	0.0316345	0.00386776	0.00426252	0.00437906	0.0456892	0.401366	0.302416	0	0	0	0.204878	0	0	0	0	0	0	0.453457	0.341665
A0A096LNH4;Q9BQS2;Q9BQS2-2;Q9BQS2-3;Q9BQS2-4;X6R8R1	0.186235	0.0279726	0.00550837	0.0504918	0.0706079	0.00207594	0.00460604	0.0686065	0.312931	0.00775787	0.00846541	0.254742	0.225871	0	0	0	0.0856357	0	0	0	0.379533	0	0	0.30896
A0A096LNR9;A0A1B0GUM4;A0A669KBC2;O76039;O76039-1	0.0416394	0.0285007	0.0217526	0.00568747	0.146026	0.162493	0.0894116	0.100797	0.0039204	0.387215	0.00321849	0.00933865	0	0	0	0	0.183327	0.204001	0	0.126544	0	0.486128	0	0
A0A096LNV3;A0A096LP02;Q9Y508;Q9Y508-2	0.00627613	0.00321167	0.00719355	0.0054461	0.00700852	0.00196858	0.00270662	0.00772835	0.00703008	0.00389852	0.867055	0.0804765	0	0	0	0	0	0	0	0	0	0	1	0
A0A096LP25	0.003123	0.0105272	0.0112295	0.116792	0.119886	0.0196046	0.00024583	0.0107481	0.0111612	0.00923502	0.132664	0.554783	0	0	0	0.147565	0.151474	0	0	0	0	0	0	0.700961
A0A096LP69	0.00739305	0.0242366	0.108538	0.142118	0.0186814	0.0351271	0.053176	0.249893	0.117565	0.00884032	0.223472	0.0109584	0	0	0.128969	0.168869	0	0	0	0.296931	0.139694	0	0.265537	0
A0A096LPC5;A0A0A0MR88;Q9Y4E1;Q9Y4E1-1;Q9Y4E1-2;Q9Y4E1-6	0.00239945	0.00309037	0.00614023	0.0904167	0.115813	0.00211548	0.00593996	0.12144	0.0209512	0.00188286	0.295112	0.334699	0	0	0	0.0944319	0.120956	0	0	0.126833	0	0	0.308217	0.349562
A0A096LPI6	0.121523	0.791753	0.00963057	0.0051767	0.00191905	0.0034417	0.00402051	0.0232313	0.00697031	0.0121354	0.00953761	0.0106611	0.133063	0.866937	0	0	0	0	0	0	0	0	0	0
A0A096LPJ4;P05161	0.00466376	0.00483638	0.00950329	0.00596511	0.00323058	0.00557892	0.00292262	0.00706356	0.0489131	0.00325264	0.891574	0.0124964	0	0	0	0	0	0	0	0	0	0	1	0
A0A0A0MQR2;Q9BY42	0.0507727	0.0306198	0.0127743	0.106623	0.0116557	0.00277606	0.00211206	0.0394464	0.0673593	0.00290813	0.661391	0.0115625	0	0	0	0.127635	0	0	0	0	0.0806338	0	0.791731	0
A0A0A0MQR7;P19388	0.040583	0.0325602	0.0150315	0.137608	0.00706379	0.347162	0.00607401	0.0387958	0.0615421	0.0396371	0.0104211	0.263521	0	0.038652	0	0.163354	0	0.412114	0	0	0.0730563	0	0	0.312824
A0A0A0MQS1;Q53H96;Q53H96-2	0.00740883	0.00374867	0.00497076	0.039726	0.00367408	0.00524881	0.00250562	0.00456948	0.00984244	0.00306488	0.756864	0.158376	0	0	0	0	0	0	0	0	0	0	0.826957	0.173043
A0A0A0MQS3;K7ESE5;Q9UNZ5	0.000886054	0.0040387	0.27865	0.00734531	0.00635361	0.200029	0.0015793	0.00724172	0.29165	0.00332338	0.156006	0.042897	0	0	0.300809	0	0	0.215936	0	0	0.314843	0	0.168412	0
A0A0A0MQS9;A0A0A0MTC7	0.0386482	0.00380511	0.148779	0.100945	0.0492796	0.070431	0.332862	0.213844	0.00647301	0.0158309	0.00822122	0.0108813	0	0	0.175922	0.119361	0.0582702	0	0.393589	0.252857	0	0	0	0
A0A0A0MQT0;P09455	0.00601732	0.00417265	0.0105944	0.0130631	0.00470316	0.00260068	0.0023739	0.0211256	0.0613966	0.00818246	0.844306	0.0214645	0	0	0	0	0	0	0	0	0.0677889	0	0.932211	0
A0A0A0MQU0;Q9BV38;U3KQC1	0.0433303	0.0404181	0.0242322	0.00304406	0.00324451	0.0054093	0.00221758	0.0921616	0.753142	0.0184108	0.00778183	0.00660783	0	0.045633	0	0	0	0	0	0.104053	0.850314	0	0	0
A0A0A0MQU4;Q96I15	0.00371223	0.00392028	0.0043404	0.00577476	0.00358893	0.00584725	0.00248341	0.00423602	0.0058377	0.00283549	0.895167	0.0622566	0	0	0	0	0	0	0	0	0	0	1	0
A0A0A0MQV1;P28845	0.0670366	0.00346848	0.0713093	0.00756383	0.0182548	0.0107477	0.693648	0.0973235	0.00639936	0.0198972	0.00250357	0.00184795	0	0	0.0826984	0	0	0	0.804434	0.112868	0	0	0	0
A0A0A0MQV6;P09038;P09038-1;P09038-2;P09038-3	0.0383223	0.0748379	0.251902	0.00629109	0.00523315	0.0752271	0.0288333	0.0759608	0.323793	0.104621	0.00686752	0.00811096	0	0.0901247	0.303357	0	0	0.0905935	0	0	0.389933	0.125992	0	0
A0A0A0MQW1;A0A2R8Y4X0;A0A2R8Y5H9;A8MY87;Q8IVT5;Q8IVT5-2;Q8IVT5-3;Q8IVT5-4	0.00358828	0.414615	0	0.00410764	0.117595	0.163433	0	0	0.0129122	0.0555511	0.000804457	0.227393	0	0.449186	0	0	0.127401	0.177061	0	0	0	0	0	0.246353
A0A0A0MQX1;Q9HD67	0.0117131	0.0183946	0.525067	0.0718786	0.0354982	0.100165	0.124898	0.0238777	0.012052	0.00375338	0.00339261	0.06931	0	0	0.839795	0	0	0.160205	0	0	0	0	0	0
A0A0A0MQX8;C9JP00;Q9NR56	0.00652632	0.000810405	0.0738469	0.0683337	0.00341724	0.0698438	0.00638917	0.0722122	0.0336588	0.00883076	0.586698	0.069433	0	0	0.111797	0	0	0	0	0	0	0	0.888203	0
A0A0A0MQY7;A0A3B3ISH2;Q5VU97	0.00413958	0.00426962	0.0555834	0.0742736	0.714649	0.0177183	0.0571978	0.0577313	0.00570571	0.00622955	0.0019494	0.000552812	0	0	0	0	1	0	0	0	0	0	0	0
A0A0A0MR09;P43378	0.00890378	0.00341484	0.0742776	0.194489	0.0042485	0.403048	0.00919282	0.00680023	0.0170061	0.00144585	0.0656336	0.21154	0	0	0.0840858	0.220171	0	0.45627	0	0	0	0	0	0.239473
A0A0A0MR30;A0A0A0MRL4;F8WEZ8;G3XAD3;Q13002;Q13002-2;Q13002-3;Q13002-4;Q13002-5;Q13002-6;Q13002-7	0.00163469	0.0067915	0.00223723	0.476392	0.0748441	0.404884	9.28099e-05	0.00283477	0.00691867	0.00525514	0.0148425	0.00327309	0	0	0	0.498255	0.078279	0.423466	0	0	0	0	0	0
A0A0A0MR39	0.0176866	0.0033107	0.0216253	0.0277696	0.00405512	0.0364145	0.0326496	0.2167	0.410691	0.077009	0.0511203	0.100968	0	0	0	0	0	0	0	0.307638	0.583036	0.109326	0	0
A0A0A0MR85;Q03013	0.00402806	0.00506109	0.00543002	0.0121392	0.00486537	0.00436825	0.00238137	0.00723902	0.0195161	0.00261433	0.852261	0.0800967	0	0	0	0	0	0	0	0	0	0	1	0
A0A0A0MR93;A0A0C4DH11;K7ELZ7;K7ES91;Q53F39;Q53F39-2;Q53F39-3	0.013695	0.181404	0.0167004	0.00575502	0.375247	0.0270025	0.0837644	0.0822839	0.002777	0.20607	0.00125699	0.0040439	0	0.237837	0	0	0.491985	0	0	0	0	0.270178	0	0
A0A0A0MRB5;Q8WXG6;Q8WXG6-2;Q8WXG6-3;Q8WXG6-7	0.00224068	0.00652494	0.484067	0.00326495	0.0169583	0.00872834	0.00389219	0.0168719	0.0304452	0.000572534	0.00866522	0.417768	0	0	0.536758	0	0	0	0	0	0	0	0	0.463242
A0A0A0MRC4;A0A0A0MSK4;Q86YR5;Q86YR5-4	0.0119933	0.00713613	0.045044	0.0663909	0.00272495	0.00332125	0.00109136	0.00442186	0.15886	0.121418	0.538138	0.0394605	0	0	0	0	0	0	0	0	0.194107	0.148357	0.657536	0
A0A0A0MRE3;G3V5X4;Q8WXH0;Q8WXH0-2	0.0332009	0.00453458	0.0343208	0.0237572	0.00667848	0.113018	0.0109304	0.0161571	0.0600998	0.0227739	0.634741	0.0397879	0	0	0	0	0	0.139899	0	0	0.0743939	0	0.785707	0
A0A0A0MRE5;Q9ULH1;Q9ULH1-2	0.00193123	0.00435202	0.243383	0.0357498	0.00263809	0.0237629	0.00262241	0.00365965	0.019725	0.00702124	0.550965	0.10419	0	0	0.306393	0	0	0	0	0	0	0	0.693607	0
A0A0A0MRE6;O94967;O94967-2	0.0283094	6.18085e-05	0.0615413	0.203654	0.114742	0.162739	0.109841	0.0712579	0.0433001	0.176402	0.0115162	0.0166357	0	0	0	0.309722	0.174503	0.247498	0	0	0	0.268276	0	0
A0A0A0MRG8;Q16611	0.0780479	0.739618	0.00957347	0.00436246	0.0698403	0.00336356	0.00285948	0.0435588	0.0309308	0.00159264	0.00393077	0.012322	0	0.91372	0	0	0.0862804	0	0	0	0	0	0	0
A0A0A0MRG9;Q96SN8;Q96SN8-2;Q96SN8-3;Q96SN8-4	0.00390644	0.00433559	0.00297861	0.00398515	0.708889	0.0052024	0.00405983	0.0213168	0.00700694	0.232917	0.00172891	0.0036724	0	0	0	0	0.752691	0	0	0	0	0.247309	0	0
A0A0A0MRI1;Q8IXQ4;Q8IXQ4-2	0.00390224	0.00743397	0.0059685	0.00656939	0.00744669	0.00805657	0.00336974	0.00245051	0.00779961	0.00392648	0.481786	0.46129	0	0	0	0	0	0	0	0	0	0	0.510866	0.489134
A0A0A0MRI2;Q9UNH7	0.00169989	0.000738351	0.0304137	0.354149	0.00714101	0.0735176	0.000921545	0.00724094	0.000726861	0.000873942	0.425058	0.0975185	0	0	0	0.415315	0	0.0862149	0	0	0	0	0.49847	0
A0A0A0MRJ3;Q8NEY1;Q8NEY1-2;Q8NEY1-3;Q8NEY1-4;Q8NEY1-7	0.0069483	0.00261694	0.174009	0.141218	0.00338045	0.370703	0.0178689	0.0315123	0.0473946	0.00418723	0.121796	0.0783661	0	0	0.253684	0.205878	0	0.540439	0	0	0	0	0	0
A0A0A0MRJ6;P22061;P22061-2	0.00729837	0.00392108	0.0253842	0.0154612	0.00337651	0.00431087	0.00327342	0.0182363	0.032102	0.00800479	0.867217	0.0114146	0	0	0	0	0	0	0	0	0	0	1	0
A0A0A0MRJ7;P12259	0.176341	0.00206071	0.0825243	0.0288474	0.238692	0.0023386	0.180877	0.211313	0.0454163	0.0252825	0.00559883	0.000708808	0.248764	0	0.116417	0	0.336721	0	0	0.298099	0	0	0	0
A0A0A0MRM8;A0A1Y0BRN3;A0A590UJ40;E7EW20;Q9UM54;Q9UM54-1;Q9UM54-2;Q9UM54-4;Q9UM54-5;Q9UM54-6	0.0155771	0.00251591	0.190562	0.173328	0.00664257	0.0553684	0.0228281	0.07011	0.0255269	0.0168233	0.284406	0.136312	0	0	0.242876	0.22091	0	0	0	0	0	0	0.362482	0.173733
A0A0A0MRM9;Q14978;Q14978-2;Q14978-3	0.0753901	0.0109161	0.0255969	0.00208917	0.00388052	0.00510625	0.00227824	0.0733156	0.777802	0.0118049	0.00614691	0.00567336	0	0	0	0	0	0	0	0	1	0	0	0
A0A0A0MRR7;P09234	0.0097599	0.0123637	0.114185	0.00526022	0.00384512	0.00384716	0.00231674	0.0126879	0.686999	0.00378797	0.139826	0.00512079	0	0	0.121343	0	0	0	0	0	0.730066	0	0.148591	0
A0A0A0MRS4;Q9NVV0	0.0214855	0.188905	0.0136213	0.00866328	0.229515	0.0157111	0.255731	0.249385	0.00467215	0.00152259	0.00460416	0.0061839	0	0.204545	0	0	0.248517	0	0.276904	0.270033	0	0	0	0
A0A0A0MRT6;Q8IZP0;Q8IZP0-2;Q8IZP0-3;Q8IZP0-4;Q8IZP0-5;Q8IZP0-6;Q8IZP0-9	0.00505562	0.00376814	0.0162196	0.0240096	0.00511275	0.00726659	0.0031004	0.00525342	0.00621297	0.00359842	0.617706	0.302696	0	0	0	0	0	0	0	0	0	0	0.671126	0.328874
A0A0A0MRU0;A0A0C4DH75;A0A0D9SFF8;B4DZ84;D3DX48;D3DX49;Q14168;Q14168-2;Q14168-3;Q14168-4;Q14168-5;Q14168-6	0.0114427	0.446021	0.00554016	0.00650362	0.0124372	0.00592964	0.00271724	0.0227131	0.464432	0.00864841	0.00491195	0.00870242	0	0.489889	0	0	0	0	0	0	0.510111	0	0	0
A0A0A0MRV9;A0A0A0MRW3;Q5T593;Q8IW50;Q8IW50-7	0.000465824	0	0.0032323	0.429474	0.176856	0.315223	0.0606233	0.00245752	0.000654359	0.000912759	0.00585847	0.00424321	0	0	0	0.466033	0.191911	0.342056	0	0	0	0	0	0
A0A0A0MRY9;Q96AQ7;Q96AQ7-2;Q96AQ7-4	0.203641	0.00316767	0.540495	0.0493491	0.0329655	0.0158742	0.0916049	0.0373862	0.0174671	0.000767609	0.00228695	0.00499551	0.273661	0	0.726339	0	0	0	0	0	0	0	0	0
A0A0A0MRZ1	0.0092707	0.0052637	0.0123563	0.0130938	0.21406	0.0122376	0.0229129	0.0190162	0.0566189	0.00823933	0.614622	0.0123089	0	0	0	0	0.241794	0	0	0	0.0639544	0	0.694252	0
A0A0A0MRZ4;E7EMV7;Q15025;Q15025-2;Q15025-3;Q15025-4;Q15025-5;Q15025-6;Q15025-7;Q15025-8	0.00491744	0.012364	0.00316175	0.0194306	0.00454168	0.0121774	0.0031041	0.00393725	0.0606619	0.00456923	0.639549	0.231585	0	0	0	0	0	0	0	0	0.0651021	0	0.686361	0.248536
A0A0A0MS31;Q14790;Q14790-2;Q14790-4;Q14790-7;Q14790-8;Q14790-9	0.00191444	0.00196994	0.0147976	0.0150062	0.00305814	0.0192026	0.00277206	0.024331	0.123063	0.00280452	0.66857	0.122511	0	0	0	0	0	0	0	0	0.134621	0	0.731362	0.134017
A0A0A0MS45;A0A6I8PIQ6;J3KNI1;Q9H9E3	0.00501602	0.00283889	0.0140937	0.0335648	0.00997212	0.00396412	0.00336495	0.0157951	0.0431073	0.00599898	0.452237	0.410047	0	0	0	0	0	0	0	0	0	0	0.524464	0.475536
A0A0A0MSC1;O60266	0.000792746	0.136413	0.00404779	0.138175	0.472943	0.000405321	0.00289479	0.110599	0.0533557	0.075152	0.00440539	0.000815955	0	0.146165	0	0.148053	0.506752	0	0	0.118506	0	0.0805244	0	0
A0A0A0MSI2;B3KPJ4;Q8IXK0;Q8IXK0-2;Q8IXK0-4;Q8IXK0-5	0.00918205	0.0176616	0.0571576	0.00167751	0.00386607	0.00806898	0.00333229	0.0195659	0.8674	0.00233249	0.00489824	0.00485731	0	0	0	0	0	0	0	0	1	0	0	0
A0A0A0MSI8;O00471	0.00224454	0.0431054	0.0503772	0.224876	0.0072142	0.0833313	0.00454313	0.0156711	0.064543	0.0491113	0.0734473	0.381535	0	0.054058	0	0.282015	0	0.104505	0	0	0.0809427	0	0	0.478479
A0A0A0MSJ9;Q15283;Q15283-2	0.044106	0.0172759	0.279985	0.0311044	0.0636874	0.0270287	0.160739	0.203578	0.0838584	0.0759069	0.00405166	0.00867889	0	0	0.396009	0	0.0900792	0	0	0.28794	0.118609	0.107362	0	0
A0A0A0MSN4;P12821;P12821-2	0.433315	0.0736232	0.0046693	0.00869415	0.0191978	0.0133881	0.103547	0.128222	0.0229937	0.183869	0.0046898	0.00379017	0.529059	0.0898907	0	0	0	0	0	0.156554	0	0.224497	0	0
A0A0A0MSP4;Q86WC4	0.0856369	0.0206304	0.00851894	0.0444882	0.00803168	0.043429	0.298371	0.0125356	0.0273321	0.419751	0.00567093	0.0256037	0	0	0	0	0	0	0.415488	0	0	0.584512	0	0
A0A0A0MSQ0;P13797;P13797-2	0.00482863	0.00462653	0.0195077	0.0067773	0.00321853	0.00424028	0.00316907	0.00589692	0.00928106	0.00333711	0.906716	0.0284011	0	0	0	0	0	0	0	0	0	0	1	0
A0A0A0MSS8;P42330	0.00414504	0.00428936	0.00351088	0.0202784	0.00341602	0.00606147	0.00230324	0.00364571	0.00739216	0.0036375	0.89853	0.0427907	0	0	0	0	0	0	0	0	0	0	1	0
A0A0A0MSU2;A0A1C7CYX1;Q6PJG2	0.0283304	0.00517362	0.00723519	0.00472746	0.230685	0.00465401	0.00379767	0.0160314	0.680313	0.00612146	0.00310853	0.00982174	0	0	0	0	0.253223	0	0	0	0.746777	0	0	0
A0A0A0MSU4;O94911-3	0.0120971	0.0281183	0.285807	0.025561	0.0105679	0.120111	0.304061	0.0283947	0.00832541	0.172189	0.00227533	0.00249208	0	0	0.323982	0	0	0.136154	0.344675	0	0	0.195189	0	0
A0A0A0MSV9;A0A0G2JH37;A0A0G2JKZ1;A2AB90;O15533;O15533-3	0.0175767	0.0156496	0.0113469	0.0127942	0.0138502	0.0263153	0.802431	0.0337648	0.00275441	0.0583393	0.00284179	0.00233578	0	0	0	0	0	0	1	0	0	0	0	0
A0A0A0MSZ3;A0A0A0MT29;A0A0A0MT41;C9JP92;Q9NUJ7;X6RFG1	0.132043	0.00355979	0.00881104	0.027711	0.579713	0	0.0394124	0.203755	0.000810146	0.000364951	0.00145562	0.00236317	0.144229	0	0	0	0.633212	0	0	0.222559	0	0	0	0
A0A0A0MT02;P18615;P18615-3	0.00736508	0.00584214	0.00521308	0.042728	0.00602768	0.00538867	0.000741027	0.0152317	0.320617	0.0176225	0.51922	0.0540034	0	0	0	0	0	0	0	0	0.381761	0	0.618239	0
A0A0A0MT32;P38571;P38571-2	0.0826751	0.07029	0.00361753	0.00545829	0.00459926	0.00816543	0.0199364	0.00717519	0.0113204	0.779781	0.00367873	0.00330227	0	0.0826872	0	0	0	0	0	0	0	0.917313	0	0
A0A0A0MT33;Q9UPN6	0.0138036	0.0101092	0.0352296	0.00258144	0.161851	0.00440945	0.00193672	0.0996947	0.623172	0.0388451	0.00479978	0.00356741	0	0	0	0	0.182941	0	0	0.112685	0.704374	0	0	0
A0A0A0MT35;A0A2P0CTB1;Q8TBF2;Q8TBF2-3	0.00845696	0.0336588	0.00935393	0.0138926	0.00180829	0.00596371	0.00224811	0.0103393	0.10944	0.00742464	0.780457	0.0169573	0	0.0364448	0	0	0	0	0	0	0.118498	0	0.845057	0
A0A0A0MT61;G5E979;H7BYM2;Q8WYN0;Q8WYN0-3;Q8WYN0-5	0.00566399	0.0039092	0.00658989	0.00689815	0.0188703	0.00445898	0.00124019	0.00704248	0.0396279	0.00482554	0.29062	0.610253	0	0	0	0	0	0	0	0	0	0	0.322598	0.677402
A0A0A0MT71;Q6UX73;Q6UX73-2	0.0315976	0.0809269	0.00762832	0.00662048	0.364592	0.00260534	0.292714	0.0648786	0.0889065	0.0489284	0.000495492	0.0101065	0	0.0978395	0	0	0.440787	0	0.353887	0	0.107487	0	0	0
A0A0A0MT72;Q9BSQ5;Q9BSQ5-2	0.00177083	0.0844968	0.217702	0.0282959	0.0037028	0.00970534	0.00197675	0.0238949	0.0533953	0.0762954	0.398	0.100764	0	0.108818	0.280365	0	0	0	0	0	0	0.0982563	0.51256	0
A0A0A0MT83;P26440	0.0767994	0.85519	0.00564122	0.00396915	0.0024315	0.00346886	0.00412999	0.00815903	0.00935824	0.0159069	0.00682315	0.00812233	0	1	0	0	0	0	0	0	0	0	0	0
A0A0A0MTB8;Q8NI36	0.0586914	0.0041588	0.0283738	0.00580197	0.00407102	0.124957	0.0250304	0.0895596	0.627933	0.0214361	0.00416755	0.00581928	0	0	0	0	0	0.148326	0	0.106309	0.745366	0	0	0
A0A0A0MTC2;D6RA37;D6RDV0;D6RIY7;Q13454;Q13454-2	0.158966	0.00980365	0.0491521	0.0160848	0.0665772	0.107439	0.393037	0.0569384	0.00422826	0.121099	0.00911183	0.00756275	0.187655	0	0	0	0.0785926	0.126828	0.46397	0	0	0.142954	0	0
A0A0A0MTH3;Q13418	0.00552062	0.00420007	0.0766498	0.0179145	0.00325241	0.00386917	0.00281738	0.00487675	0.0116642	0.00215866	0.801858	0.0652188	0	0	0.08725	0	0	0	0	0	0	0	0.91275	0
A0A0A0MTH9;O14981	0.0135404	0.00125981	0.0483026	0.0549985	0.00445751	0.0198301	0.000309322	0.011472	0.318787	0.117373	0.260018	0.149651	0	0	0	0	0	0	0	0	0.376893	0.138767	0.307411	0.176929
A0A0A0MTJ5;Q01973	0.0730602	0.0242875	0.170993	0.0637695	0.07335	0.0108287	0.0834375	0.293392	0.0134605	0.0153211	0.00114951	0.17695	0	0	0.239257	0	0.102633	0	0	0.410519	0	0	0	0.247591
A0A0A0MTN0;Q13617;Q13617-2	0.0098703	0.00406813	0.0224536	0.0631519	0.00413451	0.00557487	0.00412305	0.00678924	0.0141627	0.00589583	0.44557	0.414206	0	0	0	0	0	0	0	0	0	0	0.51824	0.48176
A0A0A0MTR7;Q63HN8	0.00118754	0.00431304	0.0102978	0.0227118	0.00412435	0.200409	0.00465649	0.00132043	0.00796454	0.0103781	0.0325947	0.700043	0	0	0	0	0	0.222565	0	0	0	0	0	0.777435
A0A0A0MTS7;Q8WZ42;Q8WZ42-11;Q8WZ42-12;Q8WZ42-13;Q8WZ42-2;Q8WZ42-4;Q8WZ42-5;Q8WZ42-7;Q8WZ42-8	0.270272	0.607675	0.00732548	0.00411429	0.00223432	0.00405737	0.00841721	0.00920607	0.00685532	0.0632511	0.00773951	0.00885222	0.307846	0.692154	0	0	0	0	0	0	0	0	0	0
A0A0A0MTU3;Q4ZIN3;Q4ZIN3-2	0.105379	0.00377453	0.00963911	0.221624	0.0552866	0.0014531	0.389939	0.069846	0.00122904	0.13999	0.00105965	0.000779829	0	0	0	0.274682	0.0685225	0	0.483292	0	0	0.173504	0	0
A0A0A6YYC0;E9PJN1;O75676;O75676-2	0.00461392	0.00529613	0.0180584	0.0223266	0.00590947	0.0170018	0.000474206	0.00259688	0.0764961	0.0018915	0.473835	0.3715	0	0	0	0	0	0	0	0	0.0829828	0	0.514015	0.403002
A0A0A6YYC7;Q96JP5;Q96JP5-2	0.00947975	0.00699605	0.0140511	0.0202422	0.006458	0.0413959	0.0347093	0.0340711	0.733779	0.0606941	0.014892	0.0232321	0	0	0	0	0	0	0	0	1	0	0	0
A0A0A6YYG5;Q53S48;Q9Y6Q2;Q9Y6Q2-2;Q9Y6Q2-3	0.0147867	0.0143542	0.1382	0.0441499	0.00583347	0.00569122	0.00726468	0.0863843	0.0577553	0.0561861	0.459522	0.109872	0	0	0.210839	0	0	0	0	0	0.0881119	0	0.70105	0
A0A0A6YYH1;Q7Z6K5;Q7Z6K5-2	0.0048129	0.00476681	0.00618676	0.00549532	0.0029787	0.00460935	0.00293444	0.00588631	0.00908203	0.00351373	0.940316	0.00941788	0	0	0	0	0	0	0	0	0	0	1	0
A0A0A6YYI3;A0A0B4J1V8;A8MV53;Q9NQ55;Q9NQ55-2;Q9NQ55-3	0.00813095	0.0135333	0.200021	0.00277381	0.00537632	0.00579916	0.0036585	0.00328706	0.735207	0.00680221	0.00642319	0.00898757	0	0	0.213874	0	0	0	0	0	0.786126	0	0	0
A0A0A6YYJ5	0.0318001	0.0111145	0.141049	0.0488358	0.0236214	0.103424	0.103903	0.151289	0.279275	0.0544668	0.00648673	0.0447346	0	0	0.20895	0	0	0.153213	0	0.22412	0.413718	0	0	0
A0A0A6YYJ8;Q96HJ9-2	0.00302267	0.00335247	0.0722732	0.0188746	0.00150049	0.00888629	0.00214157	0.00380191	0.0563864	0.00268495	0.798753	0.0283229	0	0	0.0779299	0	0	0	0	0	0.0607997	0	0.86127	0
A0A0A6YYL4;P57737-3	0.0418405	0.0729033	0.154753	0.0526399	0.0050609	0.017231	0.00521382	0.014843	0.0309888	0.00604729	0.432907	0.165572	0	0.0882462	0.187322	0	0	0	0	0	0	0	0.524015	0.200417
A0A0B4J1R2;Q9H6R3	0.10076	0.823343	0.0062642	0.0041998	0.00280728	0.00367633	0.00213809	0.00836808	0.00705717	0.0234208	0.00651934	0.0114458	0	1	0	0	0	0	0	0	0	0	0	0
A0A0B4J1R7;Q96B45	0.0247047	0.0107232	0.16239	0.034293	0.0044261	0.00374359	0.00462822	0.256145	0.103947	0.0358767	0.350396	0.00872636	0	0	0.18604	0	0	0	0	0.293449	0.119086	0	0.401426	0
A0A0B4J1S8;Q9UBF8;Q9UBF8-2;Q9UBF8-3	0.00190113	0.00255808	0.0349117	0.0240299	0.00329938	0.0685988	0.00454057	0.00218513	0.0043309	0.00229235	0.730088	0.121264	0	0	0	0	0	0	0	0	0	0	0.857563	0.142437
A0A0B4J1Z1;C9JAB2;Q16629;Q16629-2;Q16629-3;Q16629-4	0.0228901	0.00746859	0.138602	0.010965	0.0035193	0.0302626	0.0117124	0.0863751	0.64076	0.0243577	0.010479	0.0126078	0	0	0.177841	0	0	0	0	0	0.822159	0	0	0
A0A0B4J221;E9PR99;Q96LU5	0.0393249	0.898299	0.00485293	0.00364175	0.00277648	0.0026117	0.00169009	0.00821595	0.00895087	0.0139474	0.00732539	0.00836328	0	1	0	0	0	0	0	0	0	0	0	0
A0A0B4J223;A0A2R8Y5M4;A0A2R8Y646;A0A2R8YD57;A0A590UJK9;A0A590UK40;A0A6Q8PFJ7;A8MYG7;H7C3B7;Q9UPM9;Q9UPM9-2	0.00239965	0.00402337	0.22837	0.190273	0.0089462	0.00382612	0.0029879	0.0596444	0.0415481	0.000986444	0.280766	0.176229	0	0	0.260804	0.217297	0	0	0	0	0	0	0.320642	0.201258
A0A0B4J294;H3BP13;Q9UL33;Q9UL33-2	0.00187508	0.00589295	0.0227509	0.00992803	0.00625181	0.00559859	0.00461003	0.00312495	0.00698927	0.000953342	0.272401	0.659624	0	0	0	0	0	0	0	0	0	0	0.292268	0.707732
A0A0B4J297;I3L4V0;Q9BRA0;Q9BRA0-2	0.00159837	0.00227876	0.00783315	0.220781	0.00484705	0.445496	0.00075647	0.00603227	0.0114385	0.00245854	0.276925	0.0195554	0	0	0	0.234076	0	0.472323	0	0	0	0	0.293601	0
A0A0B4J2A0	0.0050548	0.0049547	0.0031976	0.0048162	0.00464968	0.00291273	0.00242902	0.00393895	0.00615964	0.00405625	0.910198	0.0476323	0	0	0	0	0	0	0	0	0	0	1	0
A0A0B4J2A2	NaN	NaN	NaN	NaN	NaN	NaN	NaN	NaN	NaN	NaN	NaN	NaN	NaN	NaN	NaN	NaN	NaN	NaN	NaN	NaN	NaN	NaN	NaN	NaN
A0A0B4J2C3;P13693;Q5W0H4	0.00533458	0.00404031	0.00578813	0.00628621	0.00331356	0.00385702	0.0033963	0.00568753	0.0058121	0.00336555	0.940736	0.0123825	0	0	0	0	0	0	0	0	0	0	1	0
A0A0B4J2D5;P0DPI2	0.239117	0.672914	0.00188259	0.000502595	0.0026272	0.00159219	0.00384247	0.014184	0.0119639	0.0436921	0.00361221	0.0040703	0.262181	0.737819	0	0	0	0	0	0	0	0	0	0
A0A0B4J2E5;Q15269	0.0906307	0.00871157	0.12395	0.00329197	0.00576044	0.00507124	0.00719115	0.103416	0.633385	0.00807792	0.00543495	0.00507969	0	0	0.144002	0	0	0	0	0.120146	0.735852	0	0	0
A0A0B4J2F0	NaN	NaN	NaN	NaN	NaN	NaN	NaN	NaN	NaN	NaN	NaN	NaN	NaN	NaN	NaN	NaN	NaN	NaN	NaN	NaN	NaN	NaN	NaN	NaN
A0A0B4J2F8;E2QRJ6;F6S314;P52435	0.00412789	0.0070378	0.057817	0.00391782	0.0020039	0.00162294	0.00384714	0.00324136	0.0767292	0.00127328	0.708129	0.130253	0	0	0	0	0	0	0	0	0.0838469	0	0.773818	0.142335
A0A0C4DFL7;Q16850	0.0107016	0.00390751	0.0235202	0.0203849	0.0616972	0.00977888	0.789499	0.0680091	0.00163326	0.00658833	0.00273945	0.00154077	0	0	0	0	0.0724829	0	0.927517	0	0	0	0	0
A0A0C4DFL8;F5GX28;O94953	0.00297157	0.025858	0.00442239	0.00104241	0.0106046	0.0062058	0.00208048	0.0797302	0.812078	0.0316866	0.00656616	0.0167542	0	0	0	0	0	0	0	0	1	0	0	0
A0A0C4DFM0;G3V4T6	0.273018	0.384878	0.0716653	0.00376885	0.000316694	0.00650841	0.00831058	0.0888034	0.0216189	0.0126592	0.0950088	0.0334434	0.333614	0.470301	0.0875713	0	0	0	0	0.108513	0	0	0	0
A0A0C4DFM1;Q92544	0.00406372	0.00210326	0.00418417	0.0211222	0.707098	0.0128677	0.21295	0.0268546	0.000936404	0.00478912	0.00137737	0.00165354	0	0	0	0	0.768544	0	0.231456	0	0	0	0	0
A0A0C4DFM2;Q6ZN55;Q6ZN55-2	0.0058147	0.00686265	0.00703258	0.00501928	0.00697099	0.00790727	0.00645202	0.0147323	0.912263	0.0101727	0.00620426	0.0105682	0	0	0	0	0	0	0	0	1	0	0	0
A0A0C4DFM7;Q5TAX3	0.00295398	0.106266	0.242186	0.00421402	0.0301625	0.248388	0.00536334	0.0151347	0.169277	0.151409	0.00925896	0.0153861	0	0.115818	0.263956	0	0	0.270715	0	0	0.184493	0.165019	0	0
A0A0C4DFN3;Q99685	0.00494847	0.00401157	0.0242098	0.00767816	0.00257751	0.00450603	0.00298546	0.00534025	0.00790167	0.00274851	0.909886	0.023207	0	0	0	0	0	0	0	0	0	0	1	0
A0A0C4DFR3;Q9NQR1;Q9NQR1-2	0.00483902	0.00472981	0.510372	0.00601338	0.00864926	0.00515701	0.00886195	0.00905631	0.42637	0.00101353	0.0086845	0.00625361	0	0	0.544837	0	0	0	0	0	0.455163	0	0	0
A0A0C4DFS6;Q9C004	0.0188982	0.000892261	0.00456666	0.545217	0.311866	0.0131585	0.0882453	0.00941568	0.00056784	0.000274411	0.0034438	0.00345422	0	0	0	0.636131	0.363869	0	0	0	0	0	0	0
A0A0C4DFT3;A0A590UJ08;A0A590UJD9;Q12959-2;Q12959-4	0.137977	0.0363665	0.160436	0.0234624	0.0126775	0.00606663	0.0921294	0.311567	0.117301	0.0137745	0.0645618	0.0236802	0.180681	0.0476221	0.210091	0	0	0	0	0.407999	0.153606	0	0	0
A0A0C4DFV0;Q9H469	0.00561677	0.00504193	0.00443066	0.00785128	0.00397121	0.00444619	0.00246557	0.00575862	0.030025	0.00437604	0.903297	0.0227199	0	0	0	0	0	0	0	0	0	0	1	0
A0A0C4DFX4;Q6ZRS2;Q6ZRS2-2;Q6ZRS2-3	0.0628648	0.012764	0.0366827	0.00214423	0.0110699	0.00877328	0.00341186	0.106927	0.722167	0.0183441	0.00834557	0.00650567	0	0	0	0	0	0	0	0.128969	0.871031	0	0	0
A0A0C4DFX9;Q9H3P2	0.00594978	0.0143741	0.0872743	0.0681835	0.0072475	0.011699	0.00348806	0.00896369	0.603397	0.00936761	0.158314	0.0217408	0	0	0.102798	0	0	0	0	0	0.710727	0	0.186475	0
A0A0C4DFZ2;P15289;P15289-2	0.0828277	0.0224346	0.00401526	0.0062293	0.00443857	0.00839628	0.00927377	0.00624769	0.0105428	0.838107	0.0036583	0.00382841	0	0	0	0	0	0	0	0	0	1	0	0
A0A0C4DFZ9;Q58A45;Q58A45-3	0.0017086	0.00121949	0.0101086	0.573377	0.164156	0.164678	0.00699736	0.0436016	0.0160775	0.00369543	0.00506707	0.00931324	0	0	0	0.635525	0.181949	0.182527	0	0	0	0	0	0
A0A0C4DG17;C9J9K3;P08865	0.00249275	0.00398963	0.00748382	0.0264556	0.0103125	0.878016	0.0242494	0.00680073	0.00866876	0.0101053	0.00598518	0.01544	0	0	0	0	0	1	0	0	0	0	0	0
A0A0C4DG21;A0A7D9NKC8;E7EP65;E7EW77;E9PEZ7;F8WAL6;Q9NYB9;Q9NYB9-2;Q9NYB9-4	0.0132009	0.000270186	0.0558879	0.132656	0.00845239	0.0832437	0.00427049	0.00560041	0.0547161	0.00519637	0.437921	0.198584	0	0	0	0.155626	0	0.0976575	0	0	0	0	0.513747	0.232969
A0A0C4DG40;Q8NF91-4	0.0128465	0.1289	0.00437861	0.00584784	0.267295	0.00150485	0.2969	0.0513296	0.125521	0.0877142	0.00582682	0.0119351	0	0.142221	0	0	0.29492	0	0.327585	0	0.138494	0.0967794	0	0
A0A0C4DG49	0.032802	0.00887372	0.0121602	0.0249933	0.137772	0.00230842	0.219671	0.243041	0.0841325	0.0253058	0.00218179	0.206758	0	0	0	0	0.154561	0	0.246441	0.272659	0.0943851	0	0	0.231954
A0A0C4DG51;Q9NP80;Q9NP80-3	0.165971	0.691668	0.0596135	0.000916681	0.000494184	0.00264643	0.00409179	0.0195282	0.0214763	0.0234743	0.00402425	0.00609579	0.193521	0.806479	0	0	0	0	0	0	0	0	0	0
A0A0C4DG62;F8WCT1;Q66PJ3;Q66PJ3-2;Q66PJ3-3;Q66PJ3-7	0.00232083	0.120526	0.0191336	0.0816038	0.0543292	0.0127482	0.38503	0.0983585	0.0517999	0.159759	0.00866876	0.00572287	0	0.133976	0	0.0907106	0.0603923	0	0.427998	0.109335	0	0.177588	0	0
A0A0C4DG89;Q7L014	0.0133028	0.0184087	0.0157907	0.00582684	0.00214892	0.0342634	0.00194982	0.0901206	0.614046	0.0281587	0.153058	0.0229253	0	0	0	0	0	0	0	0.105131	0.716318	0	0.178551	0
A0A0C4DG91;C9J9V6;O75414	0.0445858	0.865894	0.00583958	0.00344437	0.00296014	0.00312285	0.0100021	0.011234	0.0208535	0.0182179	0.00549544	0.00835049	0	1	0	0	0	0	0	0	0	0	0	0
A0A0C4DGA2;O75521;O75521-2	0.11481	0.813818	0.00492584	0.00398143	0.00254617	0.00330168	0.00668346	0.00893198	0.00888121	0.0184534	0.00627756	0.00738974	0.123634	0.876366	0	0	0	0	0	0	0	0	0	0
A0A0C4DGA6;Q14527;Q14527-2	0.00464452	0.00553086	0.0279187	0.0203533	0.0897402	0.596529	0.0856095	0.0140283	0.0757472	0.0245209	0.0209828	0.0343942	0	0	0	0	0.117767	0.78283	0	0	0.0994036	0	0	0
A0A0C4DGA7;O94929-3	0.0129131	0.00891437	0.0953592	0.281374	0.0132817	0.1819	0.056287	0.142449	0.0531903	0.0619354	0.0299271	0.0624686	0	0	0.136017	0.401343	0	0.259457	0	0.203184	0	0	0	0
A0A0C4DGB0;Q9UIL1;Q9UIL1-2;Q9UIL1-3	0.00540018	0.00375046	0.00675298	0.0105094	0.00400227	0.00323267	0.00265522	0.00626868	0.00702677	0.0027581	0.938136	0.00950701	0	0	0	0	0	0	0	0	0	0	1	0
A0A0C4DGB6;P02768;P02768-1	0.00515041	0.0129612	0.227209	0.0638245	0.0189203	0.069295	0.00717481	0.188319	0.0295539	0.00123166	0.132975	0.243386	0	0	0.344824	0	0	0	0	0.285801	0	0	0	0.369375
A0A0C4DGB9	0.0416698	0.877459	0.00700461	0.00410408	0.00241292	0.00333857	0.00373602	0.0127748	0.0108033	0.0203991	0.00766397	0.00863417	0	1	0	0	0	0	0	0	0	0	0	0
A0A0C4DGG1;Q9UKS6	0.0044583	0.00290469	0.0885533	0.319883	0.00424556	0.326686	0.0244239	0.0472165	0.0412272	0.014739	0.0900646	0.0355974	0	0	0.120461	0.435143	0	0.444397	0	0	0	0	0	0
A0A0C4DGH0;Q5ZPR3	0.0328216	0.0147756	0.0172224	0.0170773	0.0862789	0.00628126	0.453284	0.25897	0.0942572	0.0154612	0.00225631	0.00131483	0	0	0	0	0.0966397	0	0.507716	0.290068	0.105576	0	0	0
A0A0C4DGH3;Q9Y6R0	0.00741888	0.0142586	0.135808	0.237462	0.0113812	0.248719	0.0339674	0.0678894	0.0694032	0.0284969	0.0744674	0.0707279	0	0	0.196427	0.343455	0	0.359736	0	0	0.100382	0	0	0
A0A0C4DGH8;A0A0C4DGY3;H0YJX0;Q8TAM2-3;Q8TAM2-4	0.00109161	0.00628768	0.00191458	0.0188297	0.0082039	0.0887919	0.00186028	0.000801173	0.00946803	0.00123796	5.9352e-05	0.861454	0	0	0	0	0	0.093441	0	0	0	0	0	0.906559
A0A0C4DGN6;J3QRU8;Q9Y2X7;Q9Y2X7-3	0.00299812	0.00411647	0.0078279	0.0217506	0.00636076	0.00978289	0.00471489	0.00216897	0.00322193	0.0036479	0.0822547	0.851155	0	0	0	0	0	0	0	0	0	0	0	1
A0A0C4DGP0;E7EU35;Q9UKF7-2	0.0030562	0.00760805	0.111746	0.0185525	0.00425934	0.0092546	0.00193253	0.00433143	0.00919146	0.000653472	0.734945	0.0944703	0	0	0.131979	0	0	0	0	0	0	0	0.868021	0
A0A0C4DGQ5;P04632	0.0057705	0.00352519	0.00695839	0.0061022	0.00428	0.00272709	0.00290447	0.00593234	0.00640352	0.00238522	0.92608	0.0269311	0	0	0	0	0	0	0	0	0	0	1	0
A0A0C4DGQ8;Q6IAN0	0.0141321	0.00726223	0.00960879	0.0194731	0.0172581	0.0406422	0.823886	0.0160051	0.00218033	0.043939	0.00297407	0.00263877	0	0	0	0	0	0	1	0	0	0	0	0
A0A0C4DGS1;P39656	0.0546813	0.00776315	0.0217037	0.00630921	0.0129625	0.013093	0.820878	0.0288666	0.00248898	0.0268305	0.0025193	0.0019044	0	0	0	0	0	0	1	0	0	0	0	0
A0A0C4DGT3;A0A2R8Y7T6;A0A3B3IRZ4;A0A3B3IU98;Q6DN90;Q6DN90-2;Q6DN90-3	0.00431676	0.000789712	0.152252	0.16641	0.00532601	0.0715745	0.00438541	0.00430601	0.00464081	0.00237014	0.419889	0.16374	0	0	0.16874	0.184431	0	0	0	0	0	0	0.465359	0.181471
A0A0C4DGT4	0.00883795	0.00289696	0.00824549	0.16931	0.0164098	0.0179541	0.00244502	0.0320748	0.434018	0.0371989	0.259202	0.0114067	0	0	0	0.196295	0	0	0	0	0.503191	0	0.300514	0
A0A0C4DGV4;E9PLX3;O43504;R4GMU8	0.0854043	0.0341896	0.0811944	0.0804766	0.00426393	0.0410223	0.205119	0.241051	0.0187572	0.129185	0.0585663	0.0207695	0	0.0443321	0.105281	0.10435	0	0	0.265968	0.31256	0	0.167508	0	0
A0A0C4DGV9;P49917	0.0224538	0.0071045	0.309064	0.108176	0.100719	0.00803757	0.0024476	0.00810271	0.0808429	0.00216426	0.00783387	0.343053	0	0	0.328144	0.114855	0.106937	0	0	0	0.0858336	0	0	0.364231
A0A0C4DGW0;A0A3B3IRK3;B4DGY6;H7C5F7;Q9NV92	0.000726926	0.000835854	0.00405192	0.418759	0.283982	0.045405	0.22764	0.0135247	0.000976126	0	0.00314641	0.000952166	0	0	0	0.450094	0.305232	0	0.244674	0	0	0	0	0
A0A0C4DGW2;P57768	0.00232162	9.02009e-05	0.0649138	0.472304	0.0232137	0.0737622	0.00971246	0.133123	0.00341272	0.00378529	0.184606	0.028755	0	0	0	0.546778	0	0.0853931	0	0.154114	0	0	0.213715	0
A0A0C4DH01;Q9NVU0;Q9NVU0-2;Q9NVU0-3;Q9NVU0-4;Q9NVU0-5	0.0223928	0.0409986	0.0285368	0.0077271	0.00628776	0.0156354	0.00844962	0.129396	0.42471	0.0620229	0.00691224	0.246931	0	0.0486899	0	0	0	0	0	0.153671	0.504385	0	0	0.293255
A0A0C4DH14;Q6P5X5	NaN	NaN	NaN	NaN	NaN	NaN	NaN	NaN	NaN	NaN	NaN	NaN	NaN	NaN	NaN	NaN	NaN	NaN	NaN	NaN	NaN	NaN	NaN	NaN
A0A0C4DH16;B8ZZS0;H7BXT7;Q9NYM9	0.178823	0.00956459	0.00681224	0.086011	0.631298	0.00175212	0.0184364	0.0580778	0.000773413	0.00166448	0.00272813	0.00405938	0.19955	0	0	0.0959804	0.70447	0	0	0	0	0	0	0
A0A0D9SEI0;Q9P0P8	0.0900871	0.794499	0.00309388	0.00246466	0.00448608	0.00449463	0.00761316	0.0102872	0.00823496	0.0640243	0.00316223	0.00755287	0	1	0	0	0	0	0	0	0	0	0	0
A0A0D9SEI3;A0A0D9SEN2;A0A0D9SER5;P21127;P21127-2;P21127-3;P21127-8;Q5QPR3;Q9UQ88;Q9UQ88-2;Q9UQ88-3;Q9UQ88-4	0.00431319	0.0140637	0.0278451	0.0199201	0.00216786	0.0866803	0.00201974	0.0542268	0.457559	0.00490803	0.21094	0.115356	0	0	0	0	0	0.114781	0	0	0.605894	0	0.279325	0
A0A0D9SEJ5;F5GY05;Q96EK7	0.000384848	0.00274457	0.0796474	0.0519946	0.00356454	0.0595076	0.00071742	0.000777709	0.0311643	0.000324823	0.288442	0.48073	0	0	0.0938331	0	0	0	0	0	0	0	0.339815	0.566351
A0A0D9SEN1;B4DLR2;Q12884	0.112171	0.00679287	0.0470056	0.0110353	0.00547845	0.0162156	0.255505	0.165171	0.0305378	0.293967	0.00199548	0.0541245	0.135667	0	0	0	0	0	0.309023	0.199768	0	0.355542	0	0
A0A0D9SES8;H0YKN8;H0YKT5;H0YL70;H0YNT2;Q04726;Q04726-2;Q04726-3;Q04726-4;Q04726-5;Q04726-6;Q04726-7	0.00472594	0.014157	0.0834951	0.00307291	0.013797	0.00705167	0.000718473	0.0283956	0.565038	0.0142209	0.251968	0.0133587	0	0	0.0927206	0	0	0	0	0	0.627471	0	0.279809	0
A0A0D9SEU5;Q6VN20;Q6VN20-3;R4GMX8	0.00315588	0.00453448	0.00894799	0.132604	0.0227706	0.026181	0.00143813	0.00273718	0.00834105	0.00240465	0.00937821	0.777507	0	0	0	0.145701	0	0	0	0	0	0	0	0.854299
A0A0D9SF44;A0A0R4J2E2;Q9Y3T6;Q9Y3T6-3	0.003671	0.00341069	0.678562	0.0136907	0.00665666	0.135303	0.00691063	0.00270467	0.0300238	0.00291611	0.0669975	0.0491531	0	0	0.833753	0	0	0.166247	0	0	0	0	0	0
A0A0D9SF53;A0A0D9SFB3;A0A0D9SG12;A0A2R8Y4A4;A0A2R8YF78;A0A2R8YFS5;O00571	0.00147515	0.000550625	0.0557259	0.359973	0.0190523	0.374569	0.11218	0.0547141	0.00313214	0.00362877	0.00864247	0.00635579	0	0	0	0.490065	0	0.509935	0	0	0	0	0	0
A0A0D9SF60;Q99569;Q99569-2	0.133501	0.412994	0.230841	0.000519456	0.0207326	0.000771291	0.0169368	0.122883	0.0475126	0.00795929	0.00218322	0.00316564	0.148298	0.458771	0.256427	0	0	0	0	0.136504	0	0	0	0
A0A0D9SFB1;A0A0D9SFE4;A0A0U1RQP1;Q05193;Q05193-2;Q05193-3;Q05193-5	0.0631245	0.00193837	0.0150304	0.00719489	0.0927046	0.000587256	0.00408393	0.00371502	0.0318218	0.0141235	0.0121493	0.753526	0	0	0	0	0.10955	0	0	0	0	0	0	0.89045
A0A0D9SFK2;Q92614;Q92614-3;Q92614-4	0.0896716	0.699451	0.00746296	0.00865044	0.00661026	0.00373012	0.00387468	0.00897847	0.0739337	0.0650926	0.0208089	0.0117356	0	0.904402	0	0	0	0	0	0	0.0955977	0	0	0
A0A0D9SFW8	0	0.00551408	0.00224983	0.0985208	0.750651	0.0282355	0.0129184	0.0969636	0	0.00431714	0.000478068	0.000151286	0	0	0	0.10413	0.793386	0	0	0.102484	0	0	0	0
A0A0D9SG04;A0A0X1KG75;A0A590PXD8;Q53SF7;Q53SF7-2;Q53SF7-3	0.0006293	0.00438777	0.367249	0.0182056	0.00215483	0.007718	0.00168621	0.00417389	0.0716486	0.000481232	0.39355	0.128115	0	0	0.382327	0	0	0	0	0	0.0745903	0	0.409708	0.133375
A0A0D9SG71;P49459;P49459-3	0.0032142	0.00432738	0.00634288	0.00732038	0.00404761	0.00357095	0.0031285	0.00354758	0.00489801	0.00376406	0.806665	0.149173	0	0	0	0	0	0	0	0	0	0	0.843935	0.156065
A0A0D9SG79;Q9NZ09;Q9NZ09-3;Q9NZ09-4	0.00422833	0.00491173	0.303771	0.0101422	0.0118	0.000777031	0.0041111	0.00523174	0.0597022	0.00999732	0.480625	0.104701	0	0	0.359877	0	0	0	0	0	0.070729	0	0.569394	0
A0A0D9SGD6;B0QZE2;B7Z2J6;E7ENI9;E7EV75;Q15326;Q15326-2;Q15326-3;Q15326-4;Q15326-5;Q15326-6	0.0749773	0.0358526	0.00513604	0.00334619	0.00489091	0.00453491	0.00453983	0.0376572	0.810943	0.00605011	0.00408521	0.00798711	0	0.0423392	0	0	0	0	0	0	0.957661	0	0	0
A0A0D9SGF6	0.00688597	0.00416293	0.025353	0.237853	0.0124098	0.00865982	0.00616626	0.0065284	0.0319952	0.00284941	0.0548775	0.602259	0	0	0	0.28312	0	0	0	0	0	0	0	0.71688
A0A0D9SGJ6;C9JFZ1;J3KPK1;J3KQV8;O43426;O43426-2;O43426-4	0.00246023	0.00543018	0.0301114	0.00546185	0.0139003	0.0115327	0.00419848	0.00295727	0.00738074	0.00413778	0.216667	0.695762	0	0	0	0	0	0	0	0	0	0	0.237462	0.762538
A0A0G2JH68;O60610	0.00643599	0.00366573	0.183633	0.0455712	0.00148758	0.00618693	0.00198449	0.00359036	0.0356086	0.00249603	0.572625	0.136716	0	0	0.205642	0	0	0	0	0	0	0	0.641256	0.153102
A0A0G2JHC2;Q6NYC8	0.00228979	0.00761074	0.110926	0.161219	0.00872564	0.00489356	0.000462532	0.031968	0.0905338	0.0067234	0.393752	0.180896	0	0	0.118343	0.171999	0	0	0	0	0.0965873	0	0.420079	0.192991
A0A0G2JHL0;A0A0G2JK44;A0A140T9E9;A0A140T9F7;A0A140T9V2;H0Y6K2;P25440;P25440-2;P25440-3;P25440-4;U3KQA6	0.00451818	0.0837052	0.0469243	0.00501928	0.00536887	0.00317738	0.00474783	0.0195179	0.805004	0.00733331	0.00875775	0.00592582	0	0.0941874	0	0	0	0	0	0	0.905813	0	0	0
A0A0G2JIA5;A0A0G2JL52;A0A140T8Y0;A0A140TA35;A0A140TA36;B4E0K6;Q5ST30;Q5ST30-4	0.230456	0.619664	0.00333444	0.00136193	0.000813772	0.00249663	0.00271222	0.0059081	0.0109434	0.1129	0.00530994	0.00409845	0.239305	0.643459	0	0	0	0	0	0	0	0.117236	0	0
A0A0G2JIR1;A0A0G2JIS2;A0A0G2JK64;A2ABF8;A2ABF9;Q96KQ7;Q96KQ7-2	0.0558887	0.0129082	0.0137712	0.00501928	0.00709251	0.00317738	0.00474783	0.0291953	0.851377	0.00561263	0.00368263	0.00752716	0	0	0	0	0	0	0	0	1	0	0	0
A0A0G2JIW1;P0DMV8;P0DMV9	0.00437972	0.00288767	0.0126305	0.0240599	0.00367757	0.0101566	0.00325649	0.00617012	0.0110089	0.0052452	0.834894	0.0816333	0	0	0	0	0	0	0	0	0	0	1	0
A0A0G2JJD3;O95870	0.0217828	0.00949058	0.00909589	0.0108901	0.0137955	0.0112068	0.846586	0.0370144	0.00254761	0.0320803	0.00317562	0.00233427	0	0	0	0	0	0	1	0	0	0	0	0
A0A0G2JKR7;A0A5F9ZHH6;P19793;P19793-2;P28702;P28702-3	0.00231659	0.00272948	0.0142054	0.00895822	0.00124265	0.0166522	0.00103142	0.00900273	0.253456	0.00751516	0.653862	0.0290285	0	0	0	0	0	0	0	0	0.279346	0	0.720654	0
A0A0G2JMI0;A0A0G2JNU6;A0A0G2JP18;A0A140T8W3;Q6GTX8	0.0206542	0.00851988	0.147762	0.0663623	0.021255	0.0164844	0.225327	0.32123	0.143894	0.00471128	0.0217579	0.00204247	0	0	0.176282	0	0	0	0.268818	0.383232	0.171668	0	0	0
A0A0G2JMX7;A0A0G2JPD5;A0A0G2JQJ7;A0A0G2JS76;P10636;P10636-9	0.00154021	0.000456244	0.0702544	0.178075	0.00324713	0.0647141	0.00360117	0.0701575	0.0202711	0.0022366	0.551252	0.0341942	0	0	0.0878639	0.22271	0	0	0	0	0	0	0.689426	0
A0A0G2JNW7;Q9Y666	0.00605663	0.0012833	0.00396174	0.6303	0.107229	0.0126469	0.204316	0.0198697	0.00223085	0.00719863	0.00337087	0.0015354	0	0	0	0.669218	0.11385	0	0.216932	0	0	0	0	0
A0A0G2JNZ2;A0A669KB89;Q14160	0.0852377	0.0409538	0.254	0.00994504	0.00296497	0.00486707	0.0479569	0.179061	0.11553	0.0212741	0.208556	0.0296535	0	0.051314	0.318255	0	0	0	0	0.224359	0.144756	0	0.261316	0
A0A0G2JP78;O75943-4	0.00158559	0.00216463	0.0107431	0.00217154	0.151002	0	0.000541363	0.0280883	0.443239	0.107247	0.241619	0.0115985	0	0	0	0	0.160112	0	0	0	0.469978	0.113717	0.256194	0
A0A0G2JPR0;P0C0L4	0.0174599	0.0074107	0.104177	0.0078283	0.0938657	0.0491021	0.61237	0.0798371	0.018055	0.00736673	0.0014364	0.00109131	0	0	0.128548	0	0.115825	0	0.755627	0	0	0	0	0
A0A0G2JQ41;A0A1C7CYZ0;Q12979;Q12979-2;Q12979-4	0.00405512	0.0114202	0.132815	0.080635	0.0194465	0.0917839	0.00440413	0.00293482	0.0268096	0.00605391	0.540254	0.0793876	0	0	0.157087	0.0953709	0	0.108557	0	0	0	0	0.638985	0
A0A0G2JQT1;A0A0G2JR96	NaN	NaN	NaN	NaN	NaN	NaN	NaN	NaN	NaN	NaN	NaN	NaN	NaN	NaN	NaN	NaN	NaN	NaN	NaN	NaN	NaN	NaN	NaN	NaN
A0A0G2JR66;B7WPD9;Q2KJY2;Q2KJY2-2	0.00826177	0.00534978	0.629155	0.00199308	0.00940472	0.0155868	0.00276939	0.015296	0.266629	0.0335964	0.00565442	0.00630418	0	0	0.702352	0	0	0	0	0	0.297648	0	0	0
A0A0J9YVP6;Q9UHX1-2	0.0241856	0.00914706	0.0265662	0.00450207	0.00194931	0.0110996	0.00120949	0.0625848	0.655749	0.00860111	0.182605	0.0118008	0	0	0	0	0	0	0	0	0.782187	0	0.217813	0
A0A0J9YW18;F6RP06;Q12983	0.171975	0.242579	0.00288797	0.00375704	0.00433719	0.00445156	0.292646	0.00921732	0.0318381	0.225718	0.00852455	0.00206737	0.184341	0.260022	0	0	0	0	0.313689	0	0	0.241949	0	0
A0A0J9YWB6;A0A0J9YWJ4;K7EJD2;Q9Y5B0;Q9Y5B0-4	0.00291655	0.00077158	0.130696	0.00302295	0.0202751	0.00314835	0.000834398	0.0200089	0.694236	0.0259981	0.0866614	0.0114307	0	0	0.158433	0	0	0	0	0	0.841567	0	0	0
A0A0J9YWD5;A0A0J9YX88;A0A0J9YYB5;B7ZM65;E9PJ24;F8WEF5;Q9P1Y6;Q9P1Y6-2;Q9P1Y6-3	0.103646	0.0784932	0.00265658	0.00282485	0.00571019	0.00482185	0.00357107	0.0226806	0.734568	0.0257495	0.00519083	0.0100874	0	0.0965404	0	0	0	0	0	0	0.90346	0	0	0
A0A0J9YWE1	NaN	NaN	NaN	NaN	NaN	NaN	NaN	NaN	NaN	NaN	NaN	NaN	NaN	NaN	NaN	NaN	NaN	NaN	NaN	NaN	NaN	NaN	NaN	NaN
A0A0J9YWL0;Q9Y4K1	0.00188802	0.00240635	0.0239386	0.300421	0.00678441	0.536263	0.00818065	0.00773862	0.00399912	0.00394569	0.0726073	0.0318281	0	0	0	0.359061	0	0.640939	0	0	0	0	0	0
A0A0J9YX34;A0A6Q8PF18;A0A6Q8PF63;A0A6Q8PFB0;A0A6Q8PFI4;A0A6Q8PFV0;A0A6Q8PGE9;A0A6Q8PGL5;A0A6Q8PH06;A0A6Q8PHP4;C9J084;Q9C040;Q9C040-2	0.00150558	0.00210239	0.0147943	0.0746566	0.00642247	0.588761	0.00272003	0.00964353	0.229053	0.00370128	0.0207414	0.0458985	0	0	0	0	0	0.719921	0	0	0.280079	0	0	0
A0A0J9YX62;O75190-3	0.00981992	0.0105811	0.136309	0.303494	0.00377396	0.0252587	0.00563176	0.12633	0.0645658	0.0334275	0.244446	0.0363634	0	0	0.155756	0.346793	0	0	0	0.144353	0.0737774	0	0.27932	0
A0A0J9YX66;A0A0J9YXJ0;A0A1B0GU44;A0A1B0GUN8;E9PC62;O95319;O95319-2;O95319-3;O95319-4;O95319-5;Q5VZZ6;V9GYD9	0.00641978	0.00204732	0.0245637	0.0689947	0.0761154	0.38439	0.282979	0.0356282	0.025029	0.0828513	0.00363319	0.00734859	0	0	0	0	0.0921119	0.465174	0.34245	0	0	0.100263	0	0
A0A0J9YXF2;Q15165	0.0516431	0.00424691	0.00755003	0.0065035	0.0188633	0.0148632	0.730551	0.0310266	0.00146056	0.128325	0.00302393	0.00194287	0	0	0	0	0	0	0.85059	0	0	0.14941	0	0
A0A0J9YXM6;Q562E7	0.0626762	0.00774589	0.123341	0.130727	0.0247684	0.122997	0.203582	0.133488	0.0178897	0.0750187	0.007934	0.0898318	0	0	0.156295	0.165655	0	0.15586	0.257975	0.169153	0	0.0950621	0	0
A0A0J9YXN7	0.00569822	0.00479792	0.0835209	0.00593522	0.00423238	0.00238513	0.00295784	0.00603677	0.0086607	0.00173859	0.864532	0.00950484	0	0	0.0880973	0	0	0	0	0	0	0	0.911903	0
A0A0J9YY72;A0A1W2PQQ1;Q5HYW2	0.00291533	0.00811132	0.00366871	0.00983837	0.00523135	0.0129252	0.00516897	0.00355747	0.00729977	0.00110798	0.341248	0.598927	0	0	0	0	0	0	0	0	0	0	0.362962	0.637038
A0A0J9YYJ3;Q9Y519	0.000796087	0.000578082	0.00629734	0.324641	0.054578	0.53877	0.00502666	0.00042299	0.000762736	0.00205024	0.00329291	0.0627839	0	0	0	0.353644	0.0594539	0.586903	0	0	0	0	0	0
A0A0R4J2F2;D6R9S8;D6RA76;D6RC11;D6RCE6;D6RCR8;D6RDI6;D6RDP6;D6RDY1;D6RFX6;D6RHU6;D6RIU2;H0Y8T9;Q9NY35;Q9NY35-2	0.0903391	0.125567	0.0129193	0.0010521	0.210811	0	0.14301	0.213986	0.195123	0.00111278	0.000754538	0.00532512	0	0.168436	0	0	0.282783	0	0	0.287041	0.261739	0	0	0
A0A0R4J2F6;Q12894;Q12894-2	0.00258715	0.00769144	0.00740773	0.162016	0.00726241	0.669	0.0545229	0.0126995	0.0146585	0.0264405	0.0136215	0.0220928	0	0	0	0.194961	0	0.805039	0	0	0	0	0	0
A0A0U1RQD2;Q6ZUS6;Q6ZUS6-2;Q6ZUS6-4;Q6ZUS6-5;Q6ZUS6-6	0.0257255	0.00102027	0.00464715	0.419731	0.510086	0.0239154	0.00204066	0.00421144	0.00147486	0.000591782	0.00513704	0.0014182	0	0	0	0.451412	0.548588	0	0	0	0	0	0	0
A0A0U1RQE4;A0A494C1M0	0.00526123	0.00365303	0.0251609	0.02458	0.0038204	0.00468581	0.00296941	0.00538029	0.0336314	0.00382455	0.848317	0.0387163	0	0	0	0	0	0	0	0	0	0	1	0
A0A0U1RQF0	0.00353454	0.00422457	0.00364158	0.0106767	0.0080353	0.0081218	0.00218382	0.00388479	0.00454159	0.00155443	0.108006	0.841595	0	0	0	0	0	0	0	0	0	0	0	1
A0A0U1RQK7	0.00488398	0.00192355	0.107847	0.207989	0.00468459	0.375108	0.0288128	0.0631479	0.0109741	0.00797051	0.133511	0.0531477	0	0	0.156087	0.301021	0	0.542893	0	0	0	0	0	0
A0A0U1RQK9	0.120273	0.57939	0.00239574	8.4276e-05	0.00754133	0.0145515	0.00450704	0.0142065	0.179746	0.0657805	0.00538344	0.00614009	0.136765	0.65884	0	0	0	0	0	0	0.204394	0	0	0
A0A0U1RQQ9;Q6P3W7	0.00961028	0.00422912	0.0732791	0.0585383	0.0683655	0.0071882	0.00364735	0.0741231	0.0202997	0.00279567	0.55954	0.118384	0	0	0.104508	0	0.0975001	0	0	0	0	0	0.797992	0
A0A0U1RQT7;A0A0U1RQY7;Q8IXA3;Q9HCP0;Q9HCP0-2;U3KQA5;U3KQB3	0.052777	0.0177919	0.126778	0.018394	0.0747449	0.00173976	0.259024	0.357664	0.0812735	0.00797411	0.00133198	0.000506582	0	0	0.140945	0	0.0830975	0	0.287969	0.397632	0.0903557	0	0	0
A0A0U1RQT8;Q8TCZ2;Q8TCZ2-2;Q8TCZ2-3;Q8TCZ2-5	0.00660563	0.0098624	0.113401	0.212627	0.0534904	0.0341405	0.0891937	0.3055	0.128997	0.00437222	0.0365466	0.00526403	0	0	0.139311	0.261208	0.0657119	0	0	0.3753	0.15847	0	0	0
A0A0U1RQX8;A0A0U1RR39;A0A1B0GW38;P22681	0.00144432	0.00386624	0.00445232	0.0155679	0.00291234	0.00986453	0.00172674	0.00250758	0.00689801	0.00163042	0.798747	0.150383	0	0	0	0	0	0	0	0	0	0	0.841557	0.158443
A0A0U1RR06;Q9Y484;Q9Y484-2;Q9Y484-3	0.00278949	0.00606776	0.00704559	0.0058743	0.0042941	0.00988992	0.00241166	0.00291167	0.00790355	0.00131437	0.71995	0.229548	0	0	0	0	0	0	0	0	0	0	0.758243	0.241757
A0A0U1RR70;G5E9L9;Q8N568;Q8N568-2;Q8N568-3	0.00314548	0.00375239	0.0132388	0.0131302	0.00506233	0.179558	0.00400632	0.00421992	0.00427247	0.00243485	0.510655	0.256524	0	0	0	0	0	0.18966	0	0	0	0	0.539384	0.270956
A0A0U1RRA6;B5MCG9;B5MCU0;H7C0E9;Q9Y2K5;Q9Y2K5-2;Q9Y2K5-3	0.00482922	0.00837735	0.485957	0.00329144	0.00662585	0.00170216	0.00728333	0.00814719	0.0432492	0	0.263946	0.166591	0	0	0.530235	0	0	0	0	0	0	0	0.287996	0.18177
A0A0U1RRB6;Q9Y2D4	0.0107207	0.00472962	0.127294	0.222126	0.0112308	0.0658266	0.0143734	0.0295548	0.0149612	0.029706	0.0779654	0.391512	0	0	0.171803	0.299792	0	0	0	0	0	0	0	0.528405
A0A0U1RRB9;F2Z2V1;Q96C11;Q96C11-3	0.0024788	0.00443565	0.00145051	0.00419913	0.00322304	0.002289	0.0022846	0.00271411	0.00468125	0.00272886	0.725832	0.243683	0	0	0	0	0	0	0	0	0	0	0.748655	0.251345
A0A0U1RRH6;O94880-2	0.00192194	0.0124474	0.530008	0.00808969	0.126736	0.187273	0.00164675	0.00318585	0.121607	0	0.00367128	0.00341331	0	0	0.548877	0	0.131247	0.193939	0	0	0.125936	0	0	0
A0A0U1RRK1;A0A286YF11;F6XEV2;Q9BPX6;Q9BPX6-2;Q9BPX6-3	0.0627235	0.413987	0.0269477	0.000981368	0.073227	0.193236	0.00154068	0.0397376	0.0400053	0.0533635	0.0290384	0.0652115	0	0.608401	0	0	0.107615	0.283983	0	0	0	0	0	0
A0A0U1RRL7	0.0199927	0.83015	0.00981445	0.00683512	0.00971715	0.00325979	0.000905574	0.01475	0.048244	0.0394835	0.00411481	0.0127328	0	1	0	0	0	0	0	0	0	0	0	0
A0A0U1RRL8;Q8TB22;Q8TB22-2	0.0618874	0.769864	0.0167405	0.00558362	0.00479594	0.01027	0.0696641	0.0115915	0.015572	0.0165068	0.00400993	0.0135142	0	1	0	0	0	0	0	0	0	0	0	0
A0A0U1RRM1;Q8WXI9	0.0189094	0.0370524	0.0416855	0.00126503	0.00738251	0.00773655	0.00233735	0.0109019	0.787588	0.0722122	0.00935157	0.00357797	0	0.0449316	0	0	0	0	0	0	0.955068	0	0	0
A0A140T8X5;A0A140TA37;B7ZLI8;P49842;P49842-2;P49842-3;P49842-4	0.0866673	0.00533464	0.179547	0.0436555	0.106642	0.00562716	0.00383894	0.0113953	0.541656	0.00210526	0.00575785	0.00777309	0	0	0.216885	0	0.128819	0	0	0	0.654297	0	0	0
A0A140T8Y4;Q5SPM2	0.0159297	0.0130134	0.0295713	0.0227411	0.0389009	0.0210301	0.482903	0.267716	0.0508974	0.0528917	0.00271624	0.00168861	0	0	0	0	0	0	0.643339	0.356661	0	0	0	0
A0A140T913;A0A140T9I0;A0A140T9X5;Q53Z42	0.0283682	0.00711305	0.0200454	0.0202787	0.0725823	0.00721453	0.519374	0.244891	0.0369655	0.0388815	0.00240666	0.00187913	0	0	0	0	0.0867331	0	0.620632	0.292635	0	0	0	0
A0A140T9G8;Q0P5T2;Q5SQH8;Q5SQH8-2;Q5SQH8-3;Q5SQH8-4	0.18799	0.0631013	0.00849637	0.0440484	0.42857	0.00254363	0	0.0404711	0.111763	0.103489	0.00140659	0.00812061	0.210065	0.0705111	0	0	0.478895	0	0	0	0.124887	0.115641	0	0
A0A140T9J9	0.012118	0.00512188	0.0199145	0.00712494	0.0736768	0.0132862	0.675737	0.153982	0.00507867	0.0304639	0.0023401	0.00115577	0	0	0	0	0.0815554	0	0.747997	0.170448	0	0	0	0
A0A140T9M0	0.0016617	0	0.0106264	0.00313476	0.878408	0.0477315	0.00847854	0.0464669	0.00346854	2.33933e-05	0	0	0	0	0	0	1	0	0	0	0	0	0	0
A0A140T9T7;Q03518	0.0104931	0.0043915	0.0176574	0.0365791	0.0418803	0.0350695	0.696597	0.109923	0.00181112	0.0385938	0.00511671	0.00188656	0	0	0	0	0	0	0.863707	0.136293	0	0	0	0
A0A140TA62;A0A140TA69;Q8IUT8	0.119395	0.0102407	0.32943	0.0130256	0.00322068	0.057303	0.0141421	0.00652631	0.313433	0.0515378	0.0739664	0.00777908	0.156633	0	0.432177	0	0	0	0	0	0.411191	0	0	0
A0A140TA76	0.00508834	0.0068868	0.00618788	0.159463	0.230666	0.445393	0.0889802	0.0208006	0.00370883	0.0220379	0.00551391	0.00527428	0	0	0	0.190854	0.276074	0.533072	0	0	0	0	0	0
A0A140TA86;Q5XKP0	0.0255088	0.88621	0.00731569	0.00436589	0.00512007	0.00314204	0.00446856	0.0187203	0.0178738	0.010553	0.00582092	0.0109012	0	1	0	0	0	0	0	0	0	0	0	0
A0A182DWF2;A0A182DWF3;D3YTF8;Q9NNW7;Q9NNW7-2	0.0530189	0.815169	0.00440819	0.00368097	0.00232749	0.00345312	0.00684425	0.00674484	0.00659592	0.0839692	0.00600132	0.00778643	0	0.906611	0	0	0	0	0	0	0	0.0933885	0	0
A0A1B0GTC3;A0A1B0GVH5;Q9C0B1	0.00490777	0.00408738	0.00746875	0.00497812	0.00310181	0.00422219	0.00317357	0.00602847	0.0134687	0.00369281	0.929296	0.0155746	0	0	0	0	0	0	0	0	0	0	1	0
A0A1B0GTG2;A0A1B0GW77;P49419;P49419-2	0.233607	0.628208	0.014443	0.00499688	0.0013882	0.00463837	0.00382055	0.0264059	0.0212049	0.0228157	0.0212982	0.0171731	0.271064	0.728936	0	0	0	0	0	0	0	0	0	0
A0A1B0GTJ7;A0A1B0GWJ0;P30566	0.00295736	0.00363273	0.00542793	0.00830368	0.00381823	0.00490285	0.00355621	0.00307087	0.00435588	0.00239124	0.643784	0.313799	0	0	0	0	0	0	0	0	0	0	0.672301	0.327699
A0A1B0GTJ8;A0A1B0GV63;A0A1B0GVK1;A0A1B0GWJ2;A0A3F2YNW7;A0A6Q8NVI4;H0Y7H8;Q8NFD5;Q8NFD5-2;Q8NFD5-3;Q8NFD5-4	0.00464548	0.00326465	0.0514299	0.0103074	0.158322	0.0542356	0.00322676	0.0137045	0.671425	0.00170199	0.0153319	0.0124051	0	0	0	0	0.190807	0	0	0	0.809193	0	0	0
A0A1B0GTK8;Q5GJ75	0.00426806	0.00655044	0.00396593	0.00434051	0.00720974	0.00661179	0.00504101	0.0028103	0.0644612	0.0601875	0.41318	0.421374	0	0	0	0	0	0	0	0	0.071702	0	0.459592	0.468706
A0A1B0GTL5	0.00350686	0.00376418	0.478471	0.118578	0.207864	0.00283301	0.00302432	0.00277581	0.0095349	0.00672332	0.00486453	0.158061	0	0	0.496868	0.123137	0.215856	0	0	0	0	0	0	0.164139
A0A1B0GTM3;A0A1B0GUA4;A0A1B0GW68;Q13510;Q13510-2	0.0776373	0.0137573	0.00461548	0.0068561	0.00434726	0.00845178	0.020776	0.0105923	0.0107442	0.835185	0.00339424	0.00364268	0	0	0	0	0	0	0	0	0	1	0	0
A0A1B0GTU3;Q96L93;Q96L93-4	0.0301343	0.000292753	0.0829791	0.395607	0.152667	0.0472164	0.0794762	0.163033	0.00339665	0.000759762	0.00779123	0.0366461	0	0	0.10447	0.498066	0.192207	0	0	0.205257	0	0	0	0
A0A1B0GTU4	0.0227039	0.0775991	0.0322467	0.153675	0.0173038	0.0114288	0.00534877	0.0802807	0.0425278	0.0107218	0.482457	0.0637064	0	0.108723	0	0.215312	0	0	0	0	0	0	0.675964	0
A0A1B0GTU5;H0Y488;O14497;O14497-3	0.0456831	0.105254	0.0024084	0.236752	0.0185339	0.00201077	0.00238597	0.0152104	0.121209	0.00298255	0.00685335	0.440717	0	0.11644	0	0.261913	0	0	0	0	0.134091	0	0	0.487556
A0A1B0GTW1;A0A2R8YDH4;A0A3B3IRI3;A0A3B3ITE1;Q9UDY2;Q9UDY2-3;Q9UDY2-7	0.0051549	0.00445143	0.0224294	0.0322808	0.00255045	0.0094032	0.00358938	0.00500949	0.0229009	0.00739352	0.665783	0.219053	0	0	0	0	0	0	0	0	0	0	0.752437	0.247563
A0A1B0GTW6	0.103834	0.0155718	0.125809	0.0529488	0.0132512	0.0216535	0.132443	0.360031	0.0943465	0.0168295	0.0494591	0.0138231	0	0	0.216842	0	0	0	0	0.620544	0.162614	0	0	0
A0A1B0GU24;Q9HCJ0;Q9HCJ0-2	0.0322262	0	0.0327372	0.0344911	0.0405627	0.263753	0.010943	0.0930645	0.210734	0.226703	0.0372301	0.0175556	0	0	0	0	0	0.332076	0	0.117172	0.265323	0.285429	0	0
A0A1B0GU48;A0A1B0GV09;Q9H9B1;Q9H9B1-3;Q9H9B1-4	0.0131215	0.0161722	0.172023	0.0027347	0.00574897	0.00540952	0.00423541	0.00665262	0.75986	0.00298962	0.00532653	0.00572621	0	0	0.184597	0	0	0	0	0	0.815403	0	0	0
A0A1B0GU97;A0A1B0GW37	0.00510685	0.00262319	0.0250517	0.0590903	0.00602102	0.492724	0.0650663	0.0668438	0.161731	0.0734863	0.0169576	0.0252984	0	0	0	0	0	0.676874	0	0	0.222176	0.100951	0	0
A0A1B0GUA3;Q96EK5	0.0498091	0.0194672	0.00776277	0.0706386	0.00295596	0.0122771	0.000581762	0.00408682	0.0872167	0.087001	0.564347	0.0938565	0	0	0	0	0	0	0	0	0.11809	0.117797	0.764113	0
A0A1B0GUG6;Q86WH2	0.00538994	0.0111738	0.029526	0.0723248	0.024186	0.645211	0.011345	0.0685826	0.0536931	0.0360545	0.0112159	0.0312973	0	0	0	0	0	1	0	0	0	0	0	0
A0A1B0GUI1	0.00228119	0.0021924	0.0187614	0.343946	0.0102903	0.502738	0.027839	0.00590588	0.00715516	0.0173856	0.00801103	0.0534938	0	0	0	0.406227	0	0.593773	0	0	0	0	0	0
A0A1B0GUL6;E9PEZ5;Q9UPP5;Q9UPP5-2	0.0260999	0.00215942	0.0470661	0.0166552	0.0552611	0.0307198	0.534869	0.108429	0.00379338	0.0954714	0.0730252	0.00645081	0	0	0	0	0.0695957	0	0.673612	0.136555	0	0.120236	0	0
A0A1B0GUS7;B1AM27;O14795;O14795-2	0.00162712	0.00343271	0.00977078	0.0553642	0.00351174	0.109936	0.00544818	0.00280372	0.00867744	0.00541881	0.639592	0.154417	0	0	0	0	0	0.121618	0	0	0	0	0.707556	0.170826
A0A1B0GUZ7;Q14156;Q14156-2	0.00642803	0.0300294	0.0302144	0.00775207	0.0206329	0.141025	0.107118	0.258147	0.062073	0.00573524	0.00293547	0.32791	0	0	0	0	0	0.178704	0	0.327118	0.0786575	0	0	0.41552
A0A1B0GV02;A0A1B0GVV8;A0A1B0GW50;A0JP08;E7EUW9;O60315;O60315-2;U3KQ51	0.0112961	0.0583658	0.00781778	0.0160688	0.00515429	0.00524123	0.00477349	0.0859759	0.726974	0.0296821	0.0398896	0.00876055	0	0.0743192	0	0	0	0	0	0	0.925681	0	0	0
A0A1B0GV47;Q7Z4S6;Q7Z4S6-2;Q7Z4S6-3;Q7Z4S6-4;Q7Z4S6-5;Q7Z4S6-6	0.00149775	0.00366075	0.0109947	0.088359	0.00292963	0.0773898	0.00353665	0.00225446	0.00814266	0.0124092	0.201962	0.586863	0	0	0	0.0925637	0	0.0810726	0	0	0	0	0.211573	0.614791
A0A1B0GV71;A0A1B0GW34;A0A1B0GWD3;H3BR00;Q13286;Q13286-2;Q13286-3;Q13286-4;Q13286-5;Q13286-7;Q9UBD8	0.00839292	0.00636883	0.0143748	0.0184496	0.0417212	0.0434601	0.636203	0.0551254	0.00100879	0.171528	0.00232607	0.00104044	0	0	0	0	0	0	0.787642	0	0	0.212358	0	0
A0A1B0GVA6;Q70EK9	0.00229147	0.0147613	0.0079268	0.0394747	0.0253533	0.856925	0.00161831	0.0032827	0.0228161	0.00701312	0.00212814	0.016409	0	0	0	0	0	1	0	0	0	0	0	0
A0A1B0GVD5;A0A1B0GVP3;P07339	0.0385786	0.00955999	0.00496946	0.00581312	0.00435958	0.0087028	0.0319709	0.0112681	0.012715	0.865512	0.00291492	0.00363581	0	0	0	0	0	0	0	0	0	1	0	0
A0A1B0GVI7;A0A2R8Y7G1;P35869	0.0146319	0.00214947	0.0721728	0.00185053	0.0238756	0.00148715	0.00500352	0.123585	0.292686	0.0106516	0.0528902	0.399016	0	0	0.0813251	0	0	0	0	0.139257	0.329802	0	0	0.449616
A0A1B0GVL4	0.034959	0.00115337	0.00736453	0.00640443	0.189071	0.0901112	0.295029	0.0310251	0.022886	0.317866	0.00279752	0.00133297	0	0	0	0	0.211944	0.101013	0.330721	0	0	0.356322	0	0
A0A1B0GW05	0.0160958	0.00266603	0.00760891	0.00709361	0.0176654	0.00548471	0.75472	0.0129687	0.00174132	0.170155	0.00249393	0.00130673	0	0	0	0	0	0	0.816024	0	0	0.183976	0	0
A0A1B0GW23	0.00488538	0.00382743	0.00518297	0.00603829	0.00317249	0.0038942	0.00334117	0.00545426	0.00535922	0.00304951	0.931973	0.0238219	0	0	0	0	0	0	0	0	0	0	1	0
A0A1B0GWI2;O75503	0.0402089	0.0327076	0.00799085	0.00698592	0.00339927	0.0130619	0.214452	0.0190545	0.014572	0.642809	0.00254299	0.00221587	0	0.0367515	0	0	0	0	0.240966	0	0	0.722283	0	0
A0A1C7CYX9	0.00461967	0.00384421	0.00429875	0.00616849	0.00433814	0.0043579	0.00265472	0.00415395	0.00574374	0.00304892	0.734973	0.221798	0	0	0	0	0	0	0	0	0	0	0.768181	0.231819
A0A1D5RMN4;P23945;P23945-2;P23945-3;P23945-4	0.0334273	0.0127599	0.0975688	0.0298316	0.0320058	0.190766	0.0828767	0.0935582	0.254906	0.0751475	0.0173461	0.0798057	0	0	0.137045	0	0	0.26795	0	0.131412	0.358041	0.105552	0	0
A0A1P0AYU5;Q9BWM7	0.106659	0.769412	0.00412928	0.00318739	0.00202754	0.00399854	0.0139428	0.0273027	0.00687162	0.0522949	0.00449256	0.00568171	0.121747	0.878253	0	0	0	0	0	0	0	0	0	0
A0A1P0B7D2;A0A286YEN5;A0A286YEQ0;A0A286YEQ7;A0A286YES0;A0A286YES9;A0A286YEV3;A0A286YEW9;A0A286YEX7;A0A286YEY0;A0A286YF02;A0A286YF19;A0A286YF35;A0A286YF62;A0A286YF83;A0A286YF85;A0A286YF97;A0A286YFA6;A0A286YFB6;A0A286YFC0;A0A286YFD7;A0A286YFE2;A0A286YFI3;A0A286YFJ4;A0A286YFJ6;A0A286YFM6;A0A286YFN2;D6RJF9;F8W9R5;P53779;P53779-2;P53779-3	0.00383703	0.00185881	0.0211711	0.331144	0.0116713	0.0366806	0.00247376	0.0298423	0.0106498	0.00270773	0.307078	0.240886	0	0	0	0.376682	0	0	0	0	0	0	0.349306	0.274012
A0A1W2PNH8;A0A1W2PNR0;A0A1W2PNW5;A0A1W2PPB6;A0A1W2PPR7;A0A1W2PQA9;A0A1W2PQP4;A0A1W2PQZ1;A0A1W2PS19;K7ELE1;K7EPJ2;O95427	0.0107092	0.0055469	0.0217922	0.0192802	0.0463955	0.0390147	0.764292	0.0716052	0.00198888	0.0147045	0.00275962	0.00191082	0	0	0	0	0.0572298	0	0.94277	0	0	0	0	0
A0A1W2PNR9;Q9Y5U9	0.120003	0.0236706	0.396696	0.0389235	0.0878819	0.00122791	0.00436875	0.0874274	0.225156	0.00362428	0.00568157	0.00533913	0.130841	0	0.432524	0	0.0958192	0	0	0.0953236	0.245492	0	0	0
A0A1W2PNV1;A0A1W2PNV7;A0A1W2PP78;A0A1W2PPG2;A0A1W2PPI1;A0A1W2PPJ9;A0A1W2PPM8;A0A1W2PQ00;A0A1W2PQE8;A0A1W2PQF1;A0A1W2PR00;A0A1W2PS04;J3QS66;Q7RTN6;Q7RTN6-2;Q7RTN6-3;Q7RTN6-4;Q7RTN6-5;Q7RTN6-6;Q86YC8	0.00501915	0.00604585	0.0738114	0.00292809	0.00425313	0.0023858	0.00262151	0.00556228	0.0180512	0.00129464	0.773887	0.10414	0	0	0.0870727	0	0	0	0	0	0	0	0.912927	0
A0A1W2PNV4	0.00179236	0.00219497	0.0186192	0.272924	0.0041855	0.091878	0.00321166	0.00346927	0.00159514	0.00213141	0.261529	0.336469	0	0	0	0.283469	0	0.0954279	0	0	0	0	0.271634	0.349469
A0A1W2PNW1;A0A494C0T4;H0YJH6;P42226;P42226-3	0.00438285	0.00378953	0.0227395	0.0134183	0.00260786	0.0101467	0.00184331	0.0089997	0.136686	0.00591019	0.754023	0.0354532	0	0	0	0	0	0	0	0	0.153457	0	0.846543	0
A0A1W2PNW4;P17948;P17948-2;P17948-3	0.00366483	0.00598238	0.0039816	0.00427479	0.312537	0.00531993	0.000673499	0.135952	0.022955	0.00266803	0.00446532	0.497525	0	0	0	0	0.330372	0	0	0.143711	0	0	0	0.525917
A0A1W2PNX8;Q9H3U1;Q9H3U1-2	0.0132279	0.00950227	0.184545	0.056024	0.00139842	0.00616234	0.00250733	0.0202471	0.113883	0.00427665	0.516755	0.0714712	0	0	0.226385	0	0	0	0	0	0.139702	0	0.633913	0
A0A1W2PP04;Q5JY83;Q9Y388	0.00283447	0.0220635	0.00643048	0.0279793	0.0554114	0.0177535	0.0116213	0.225562	0.457121	0.143544	0.00357157	0.0261075	0	0	0	0	0.0628505	0	0	0.255844	0.518491	0.162815	0	0
A0A1W2PP11;A0A1W2PS40;C9JNP8;F8WCQ4;Q9H300;Q9H300-2	0.047516	0.886531	0.00874505	0.00472794	0.00342423	0.00344589	0.00284568	0.0116269	0.00846739	0.00503182	0.00653557	0.011103	0	1	0	0	0	0	0	0	0	0	0	0
A0A1W2PPC6;Q9H3H5;Q9H3H5-2;Q9H3H5-3	0.0136369	0.00371265	0.0164944	0.00931999	0.0907513	0.00601912	0.805871	0.0389986	0.00173767	0.00824976	0.00235118	0.00285757	0	0	0	0	0.101215	0	0.898785	0	0	0	0	0
A0A1W2PPG1;A0A1W2PPG5;A0A1W2PPP5;A0A1W2PQM3;A0A1W2PS81;E7EQ34;I3NI02;O14653;O14653-2	0.00223598	0.00307353	0.0121901	0.0976127	0.256085	0.0890318	0.488842	0.043565	0.00135834	0.00210818	0.00318666	0.000710791	0	0	0	0.104783	0.274895	0.0955717	0.52475	0	0	0	0	0
A0A1W2PPJ5;J3QT87;Q96SW2;Q96SW2-2	0.0019341	0.00302806	0.00542788	0.00850058	0.00456181	0.0223306	0.0021912	0.00234023	0.234039	0.00134512	0.675563	0.0387379	0	0	0	0	0	0	0	0	0.257299	0	0.742701	0
A0A1W2PPM2;O43766;O43766-2	0.0235428	0.909036	0.00402347	0.0040463	0.00229994	0.00300903	0.00328677	0.00733249	0.00782526	0.0199556	0.00672869	0.00891334	0	1	0	0	0	0	0	0	0	0	0	0
A0A1W2PPZ5;P23193	0.0986672	0.281758	0.0139716	0.0171665	0.00623394	0.00348354	0.000158468	0.027213	0.0227699	0.170509	0.303834	0.0542344	0	0.372646	0	0	0	0	0	0	0	0.225511	0.401843	0
A0A1W2PQ13;A0A1W2PSA9	0.0145165	0.000594105	0.0114344	0.00341466	0.426837	0.0373993	0.312158	0.0485428	0.00612435	0.137582	0.000925224	0.000471797	0	0	0	0	0.486936	0	0.35611	0	0	0.156954	0	0
A0A1W2PQ75;O15488-4	0.00199694	0	0.077039	0.212114	0.0161085	0.197172	0.0558731	0.149908	0.0238744	0.0184653	0.220413	0.0270349	0	0	0.0899309	0.24761	0	0.230167	0	0.174994	0	0	0.257298	0
A0A1W2PQP6;Q9BWL3;Q9BWL3-2;Q9BWL3-3;X6R6F3	0.142227	0.0595249	0.00654675	0.00398187	0.0226785	0.00564263	0.594453	0.0398198	0.00165482	0.116676	0.00471458	0.00207972	0.155801	0.0652055	0	0	0	0	0.651184	0	0	0.12781	0	0
A0A1W2PR09;A0A1W2PRL5;A0A1W2PRM0;F5GYH1;Q8NC96	0.00353614	0.00519529	0.0297922	0.00692324	0.00592066	0.00428549	0.00359721	0.00587637	0.226781	0.00201627	0.350431	0.355645	0	0	0	0	0	0	0	0	0.243104	0	0.375653	0.381243
A0A1W2PR17;F2Z2I2;Q16875;Q16875-2;Q16875-3;Q16875-4;Q5VX20;Q5W015	0.00477914	0.00713421	0.0661564	0.0201481	0.00893469	0.00231653	0.00178781	0.00426212	0.209184	0.00336117	0.393947	0.277988	0	0	0	0	0	0	0	0	0.237407	0	0.447098	0.315494
A0A1W2PR46;A0A1X7SBR3;P14136;P14136-2;P14136-3	0.0055857	0.00255249	0.0163322	0.593934	0.101923	0.0220339	0.111462	0.0921434	0.0246478	0.0210147	0.00421741	0.00415394	0	0	0	0.753723	0.129344	0	0	0.116933	0	0	0	0
A0A1W2PRQ8;Q14129	0.0343711	0.0760815	0.0380827	0.0570768	0.00642186	0.00232998	0.00190593	0.0231122	0.0665609	0.00264602	0.687738	0.00367323	0	0.0916225	0	0	0	0	0	0	0.0801571	0	0.82822	0
A0A1W2PRV5;E7EQZ4;Q16637;Q16637-3	0.00278366	0.0311576	0.00482011	0.0867178	0.00491367	0.646352	0.00612647	0.00456597	0.0265302	0.112245	0.0125235	0.0612642	0	0	0	0.102586	0	0.764628	0	0	0	0.132785	0	0
A0A1W2PS05;Q8NEB9	0.00139165	0.00288202	0.0122976	0.124655	0.00618303	0.0262246	0.00423754	0.00292449	0.00160822	0.0020808	0.084812	0.730703	0	0	0	0.145734	0	0	0	0	0	0	0	0.854266
A0A1W2PS24;P04439;P04439-2;Q5SRN5;Q5SRN7	0.0112307	0.00891319	0.169676	0.0131346	0.097677	0.00420162	0.293439	0.269666	0.0448049	0.0850447	0.000795002	0.00141724	0	0	0.185336	0	0.106692	0	0.320522	0.294556	0	0.092894	0	0
A0A1W2PS43;Q14108	0.0324792	0.00688409	0.00770287	0.00876512	0.00745065	0.0080615	0.36711	0.0594655	0.00866473	0.488948	0.00252197	0.00194561	0	0	0	0	0	0	0.428838	0	0	0.571162	0	0
A0A1W2PS85;A0A494C0S2;P28715;R4GMW8	0.00589593	0.00470345	0.00557094	0.0029461	0.00839488	0.00549181	0.00352611	0.0105088	0.925346	0.0142882	0.00725869	0.00606926	0	0	0	0	0	0	0	0	1	0	0	0
A0A1X7SBR1;Q7Z3G6	0.00444486	0.00963276	0.91982	0.0033601	0.00578378	0.00143987	0.00593127	0.00296209	0.0165138	0	0.0102837	0.0198277	0	0	1	0	0	0	0	0	0	0	0	0
A0A1X7SBS0;Q96EB1	0.00543081	0.00478355	0.00384756	0.0153921	0.0162635	0.00269787	0.0033655	0.00330023	0.005931	0.00307198	0.0202597	0.915656	0	0	0	0	0	0	0	0	0	0	0	1
A0A1X7SBT7;O95502	0.0712506	0.101304	0.00653651	0.00612606	0.0454686	0.0133875	0.535125	0.0362662	0.00396779	0.177335	0.00190733	0.00132507	0	0.124488	0	0	0	0	0.657592	0	0	0.21792	0	0
A0A1X7SBY3;H0Y860;H7C5A5;H7C5C6;H7C5K2;Q9P246;Q9P246-2;Q9P246-3	0.00347523	0.156257	0.437171	0.00168132	0.163683	0.0291831	0.15102	0.0101198	0.0360548	0	0.00362015	0.00773442	0	0.206386	0.57742	0	0.216194	0	0	0	0	0	0	0
A0A1X7SBZ2;A0A5H1ZRQ2;Q92841	0.0199799	0.00123298	0.0523812	0.0526381	0.00371561	0.298956	0.0522594	0.100932	0.23543	0.0830085	0.0618136	0.0376539	0	0	0	0	0	0.416184	0	0.14051	0.327748	0.115558	0	0
A0A286YEQ6;A0A286YFD1;A0A286YFJ1;A0AVI2	0.00132812	0.000796215	0.0273049	0.461812	0.19566	0.0113543	0.229353	0.0638608	0.00151453	0.0012788	0.0047775	0.000959944	0	0	0	0.520747	0.22063	0	0.258623	0	0	0	0	0
A0A286YET3;Q6ZNW5	0.00292684	0.00382941	0.0038757	0.00582782	0.00281109	0.00569496	0.00266946	0.00411306	0.0333193	0.00252952	0.900508	0.0318946	0	0	0	0	0	0	0	0	0	0	1	0
A0A286YEX4;P08651;P08651-5;P08651-6	0.00302128	0.00309574	0.0151127	0.0525598	0.00281052	0.606	0.0146918	0.0274035	0.192014	0.0262753	0.0170334	0.0399824	0	0	0	0	0	0.759385	0	0	0.240615	0	0	0
A0A286YF00	0.0646771	0.00680863	0.401214	0.0112191	0.0221099	0.0527424	0.201952	0.122436	0.0633109	0.0464154	0.0020491	0.00506543	0	0	0.508566	0	0	0	0.255987	0.155196	0.0802508	0	0	0
A0A286YF17;A0A286YFD0;F8W9T8;P42898;P42898-2;Q5SNW7	0.00542625	0.00384185	0.0104379	0.00602871	0.0107783	0.00217903	0.00739765	0.00550387	0.018019	0.00408374	0.391425	0.534879	0	0	0	0	0	0	0	0	0	0	0.422566	0.577434
A0A286YF22;O43175	0.00611957	0.00435247	0.00659016	0.00699776	0.00394089	0.00357716	0.00268149	0.00518608	0.0117695	0.00315944	0.859914	0.0857115	0	0	0	0	0	0	0	0	0	0	1	0
A0A286YFF7;A0A2C9F2P4;P50897	0.0104087	0.0765012	0.00805343	0.00957856	0.0846794	0.00622945	0.0170991	0.00595776	0.0153184	0.56972	0.0112586	0.185195	0	0.0835079	0	0	0.0924351	0	0	0	0	0.6219	0	0.202157
A0A286YFL8	0.0719074	0.00609013	0.00504367	0.00754299	0.00488757	0.00835157	0.0443186	0.00935767	0.0176005	0.817006	0.00352961	0.00436416	0	0	0	0	0	0	0	0	0	1	0	0
A0A2Q2SV78;E9PFT7;P25054;P25054-3	0.00937116	0.088353	0.452708	0.00342223	0.0207872	0.0843261	0.00258009	0.00216709	0.280043	0	0.00104029	0.0552019	0	0.0975812	0.499992	0	0	0.0931337	0	0	0.309293	0	0	0
A0A2Q3DP09;H7BZY2;Q7Z3E5;Q7Z3E5-2	0.00547489	0.00566773	0.44488	0.0363567	0.197904	0.0134943	0.00443045	0.00232051	0.219282	0.0456661	0.00959006	0.0149332	0	0	0.516062	0	0.229569	0	0	0	0.254368	0	0	0
A0A2R2Y2Q3	0.0060509	0.00382039	0.00801623	0.00634304	0.0035232	0.00371822	0.00317873	0.00924314	0.00691324	0.00446137	0.936971	0.00776069	0	0	0	0	0	0	0	0	0	0	1	0
A0A2R8Y3M9	0.0551448	0.0239876	0.0162514	0.0302653	0.0576722	0.0129328	0.65025	0.0754441	0.00173562	0.0701812	0.00298477	0.00315	0	0	0	0	0.0814668	0	0.918533	0	0	0	0	0
A0A2R8Y3N3;A0A2R8Y5P7;P49590;P49590-2	0.0763661	0.85951	0.0064417	0.00380065	0.00234941	0.00298412	0.00910767	0.00981821	0.00552913	0.0109878	0.00564027	0.00746499	0	1	0	0	0	0	0	0	0	0	0	0
A0A2R8Y430;P48637	0.00511979	0.00444657	0.00566914	0.00607587	0.00294734	0.0036255	0.00347434	0.00526481	0.00582891	0.00286307	0.934332	0.0203528	0	0	0	0	0	0	0	0	0	0	1	0
A0A2R8Y440;A0A2R8Y4P4;A0A2R8Y7S2;A0A2R8YG32;A0A2R8YGG3;P51532;P51532-2;P51532-3;P51532-4;P51532-5;Q9HBD4	0.0104029	0.0325551	0.00493292	0.0025288	0.0123383	0.00479484	0.00343029	0.00925201	0.89916	0.0114989	0.00368395	0.00542169	0	0.0349411	0	0	0	0	0	0	0.965059	0	0	0
A0A2R8Y455;A0A2R8Y600;A0A2R8Y620;A0A2R8Y7U2;Q86VX2;Q86VX2-2	0.00200911	0.00138783	0.0444244	0.376467	0.0193987	0.00374311	0.0028267	0.00503171	0.000813437	0.00116461	0.285818	0.256916	0	0	0	0.409559	0	0	0	0	0	0	0.310942	0.279499
A0A2R8Y478;A6NNI4;G8JLH6;P21926	0.0392052	0.142681	0.0322009	0.0416185	0.230623	0.242183	1.36902e-05	0.0435031	0.164215	0.0104236	0.0179145	0.0354187	0	0.182994	0	0	0.295783	0.31061	0	0	0.210613	0	0	0
A0A2R8Y481;A0A2R8Y4I8;A0A2R8Y5N9;A0A2R8Y7K2;A0A2R8YCL5;A0A2R8YFW8;A0A2R8YGN6;A0A2U3TZR0;Q9UBP0;Q9UBP0-2;Q9UBP0-3;Q9UBP0-4	0.0037003	0.00207368	0.0690129	0.253846	0.180105	0.196024	0.058467	0.145316	0.00411357	0.00315271	0.0405739	0.0436158	0	0	0	0.32742	0.232307	0.25284	0	0.187434	0	0	0	0
A0A2R8Y4E3;A0A2R8Y4X1;A0A2R8Y504;A0A2R8Y5P8;A0A2R8Y5R7;A0A2R8Y5X5;A0A2R8Y821;A0A2R8YGQ3;B7Z2R4;O43556;O43556-4	0.0427112	0.0649494	0.0304513	0.00474755	0.013451	0.00410929	0.438286	0.282507	0.109431	0.00626636	0.00226921	0.000820771	0	0.0725551	0	0	0	0	0.48961	0.315589	0.122246	0	0	0
A0A2R8Y4H2;B1AHR1;Q9UH03;Q9UH03-2	0.0198204	0.00378026	0.13804	0.181201	0.0183165	0.0585432	0.0446288	0.0707077	0.00687594	0.0147285	0.107381	0.335977	0	0	0.210678	0.27655	0	0	0	0	0	0	0	0.512772
A0A2R8Y4K2;Q9Y2S2;Q9Y2S2-2	0.00385816	0.00368596	0.00323813	0.0166982	0.00430799	0.00681128	0.00237203	0.00457593	0.00910039	0.0034104	0.893787	0.0481541	0	0	0	0	0	0	0	0	0	0	1	0
A0A2R8Y4T1	0.051892	0.0553693	0.17386	0.0514976	0.00370148	0.0177005	0.0199926	0.168532	0.0843133	0.0416913	0.248557	0.0828934	0	0.0757828	0.237958	0	0	0	0	0.230666	0.115398	0	0.340195	0
A0A2R8Y4U1;A0A2R8YDF7;O75164	0.005772	0.00225486	0.00542236	0.00418387	0.00696557	0.00434464	0.00316522	0.0348757	0.759419	0.0310921	0.134952	0.00755263	0	0	0	0	0	0	0	0	1	0	0	0
A0A2R8Y4U4;A0A2R8Y7R1;A0A2R8YFL3;P15260	0.00556043	0.00358617	0.0091839	0.13224	0.266518	0.0314616	0.341638	0.139669	0.0122173	0.0553664	0.00167176	0.000888336	0	0	0	0.150261	0.302839	0	0.388197	0.158703	0	0	0	0
A0A2R8Y4Y7;A0A2R8YFW4;A0A2U3TZH1;Q9UQ90	0.0333272	0.331932	0.0120537	0.00745116	0.0054234	0.297329	0.072279	0.0471324	0.0729716	0.106716	0.000914696	0.012469	0	0.410325	0	0	0	0.36755	0	0	0.0902054	0.13192	0	0
A0A2R8Y4Z0;A0A2R8Y7W5;Q14004;Q14004-2	0.0123944	0.342249	0.0161632	0.00274088	0.0286514	0.00556412	0.00182989	0.00645047	0.157922	0.0975399	0.00363368	0.324862	0	0.370972	0	0	0	0	0	0	0.171175	0.105726	0	0.352126
A0A2R8Y4Z8	0.0028229	0.000597003	0.0331667	0.130881	0.00560336	0.0369988	0.00493425	0.0194751	0.00812526	0.00424523	0.717927	0.0352233	0	0	0	0.154194	0	0	0	0	0	0	0.845806	0
A0A2R8Y521;A0A2R8Y5J0;A0A2R8YFK9;A0A2U3TZM0	0.00627634	0.0439029	0.00766912	0.0428121	0.00805619	0.671801	0.00679853	0.0218888	0.119804	0.0327952	0.0258652	0.0123304	0	0.0525464	0	0	0	0.804063	0	0	0.14339	0	0	0
A0A2R8Y543;A0A2R8Y5A3;A0A2R8Y804;A0A2R8YCH5;P35222	0.225846	0.0241541	0.10835	0.00663549	0.040142	0.00600489	0.29013	0.234817	0.0482173	0.00466053	0.00405888	0.00698289	0.262874	0	0.126114	0	0	0	0.337697	0.273315	0	0	0	0
A0A2R8Y566;Q9P260-2	0.00283333	0.00248287	0.00997259	0.00849592	0.00331074	0.0149725	0.00285353	0.00357363	0.00908176	0.00249838	0.717767	0.222158	0	0	0	0	0	0	0	0	0	0	0.763643	0.236357
A0A2R8Y595;A0A2R8YFL0;P49711;P49711-2	0.0382862	0.0383361	0.0380146	0.00131413	0.00651126	0.00897683	0.00371296	0.0718312	0.749463	0.0300625	0.00844888	0.00504263	0	0.0486623	0	0	0	0	0	0	0.951338	0	0	0
A0A2R8Y5A0;A0A2R8YD58;E7EU96;P68400	0.00846349	0.00887783	0.0243336	0.0398946	0.00212775	0.0343339	0.0027045	0.0141268	0.0910899	0.00825285	0.551436	0.214359	0	0	0	0	0	0	0	0	0.106304	0	0.643536	0.250161
A0A2R8Y5A6;A0A2R8YDM9	0.0163003	0.001243	0.0389995	0.074241	0.0139571	0.147232	0.421596	0.0936419	0.00626138	0.160657	0.0171676	0.00870373	0	0	0	0	0	0.178869	0.512189	0.113764	0	0.195178	0	0
A0A2R8Y5C4	0.0042186	0.00351456	0.0118037	0.0147637	0.00356706	0.00727002	0.00281089	0.00462137	0.00444335	0.00172094	0.881342	0.0599234	0	0	0	0	0	0	0	0	0	0	1	0
A0A2R8Y5K9;A0A2R8Y7U0;H0Y770;O75140;O75140-1;O75140-4;O75140-9	0.0271158	0.00555868	0.0301298	0.126489	0.0149529	0.520425	0.0290369	0.0140722	0.0251918	0.00618194	0.00441321	0.196432	0	0	0	0.149985	0	0.617095	0	0	0	0	0	0.23292
A0A2R8Y5N2;A0A2R8Y5S3;A0A2R8YFV7;Q92574;Q92574-2	0.00313734	0.00432086	0.00930695	0.00740441	0.00566662	0.0323456	0.00357	0.00123762	0.00457585	0.00194947	0.103781	0.822705	0	0	0	0	0	0	0	0	0	0	0	1
A0A2R8Y5P9;Q8TF72	0.00743207	0.377823	0.102434	0.00999184	0.0208702	0.00105544	0.00251928	0.120841	0.0691876	0.203614	0.0647047	0.019526	0	0.432342	0.117215	0	0	0	0	0.138277	0.0791711	0.232995	0	0
A0A2R8Y5Q8;A0A2R8YHI9;Q15813;Q15813-2	0.106327	0.102902	0.0342205	0.00573858	0.00318829	0.0050001	0.00312033	0.0182182	0.0227585	0.012154	0.567697	0.118675	0.136856	0.132448	0	0	0	0	0	0	0	0	0.730696	0
A0A2R8Y635;A0A2R8YDN7	0.00104449	0.00437595	0.0838002	0.293646	0.280395	0.0232444	0.21094	0.0930927	0.00557007	0.00144236	0.00157645	0.000872494	0	0	0.0871218	0.305285	0.291509	0	0.219302	0.0967827	0	0	0	0
A0A2R8Y661	0.00846647	0.00446759	0.0898073	0.00585934	0.0121311	0.000240611	0.00284183	0.00330835	0.00883934	0.00114075	0.42233	0.440567	0	0	0.0942656	0	0	0	0	0	0	0	0.443296	0.462439
A0A2R8Y6I6	0.00375613	0.00192543	0.0157092	0.191051	0.00661927	0.248907	0.00383339	0.017041	0.0188544	0.00774301	0.377931	0.106628	0	0	0	0.233591	0	0.304329	0	0	0	0	0.462081	0
A0A2R8Y6W8;P19447	0.00728146	0.189958	0.00907412	0.00250964	0.0049398	0.005296	0.00376705	0.00996393	0.750328	0.00545523	0.00503164	0.0063951	0	0.202021	0	0	0	0	0	0	0.797979	0	0	0
A0A2R8Y6Y7;A0A2R8YDQ9;Q9P2R7;Q9P2R7-2	0.0736689	0.856579	0.00595374	0.00371542	0.00213776	0.00349414	0.00625937	0.00897186	0.012429	0.0131415	0.00596967	0.00767947	0	1	0	0	0	0	0	0	0	0	0	0
A0A2R8Y768;A0A6Q8PF14;A0A6Q8PG65;A0A6Q8PG93;A0A6Q8PGV4;O75072;O75072-2	0.00248032	0.00261573	0.00132918	0	0.663511	0.000959062	0.00171888	0.0119826	0.295174	0.0112459	0.00338084	0.00560271	0	0	0	0	0.692105	0	0	0	0.307895	0	0	0
A0A2R8Y7H3	0.106591	0.816935	0.00359632	0.00205851	0.00397469	0.00280685	0.00826162	0.0144105	0.0164632	0.0132522	0.00500658	0.00664341	0.115418	0.884582	0	0	0	0	0	0	0	0	0	0
A0A2R8Y7Q1;E7ETD6;E9PE19;Q12830;Q12830-2;Q12830-4	0.132826	0.0252922	0.156253	0.00170121	0.00723083	0.00370387	0.00556444	0.0194231	0.402505	0.00179282	0.00321378	0.240494	0.142505	0	0.167639	0	0	0	0	0	0.431836	0	0	0.258019
A0A2R8Y7R4;B2RUZ4;H3BS66	0.00104905	0.00104949	0.00953597	0.69396	0.0742024	0.0657822	0.138428	0.00366894	0.00170609	0.00337789	0.00364185	0.00359851	0	0	0	0.903403	0.0965973	0	0	0	0	0	0	0
A0A2R8Y7X5;A0A2R8YDR3;A0A2R8YDZ2;H3BMQ0;P49815;P49815-2;P49815-3;P49815-4;P49815-5;X5D2U8	0.0923945	0.015138	0.172657	0.216326	0.0154154	0.0270597	0.0263096	0.172893	0.0547092	0.0567404	0.10178	0.0485783	0	0	0.307286	0.385007	0	0	0	0.307707	0	0	0	0
A0A2R8Y7Y4;Q8N8A2;Q8N8A2-2;Q8N8A2-4	0.00567745	0.00519867	0.00685429	0.00705218	0.00713919	0.00258912	0.00381797	0.0046147	0.034711	0.00432879	0.653287	0.264729	0	0	0	0	0	0	0	0	0	0	0.711629	0.288371
A0A2R8Y811;P62263	0.00238123	0.00360162	0.00643785	0.0181117	0.00895502	0.901046	0.0182275	0.00579135	0.00886309	0.0086787	0.00570374	0.0122025	0	0	0	0	0	1	0	0	0	0	0	0
A0A2R8Y849;A0A2R8YD14;E7ETK0;P62847;P62847-2;P62847-3;P62847-4	0.00234464	0.00139041	0.00854055	0.0289919	0.00762123	0.876011	0.0165686	0.0107672	0.0212591	0.0111843	0.00547339	0.00984778	0	0	0	0	0	1	0	0	0	0	0	0
A0A2R8Y852;A0A2R8YDI1;P39880-3	0.0888293	0.040503	0.00928036	0.016054	0.680817	0.000865125	0.0130273	0.106326	0.0397307	0.00189086	0.00135965	0.00131686	0	0.0489376	0	0	0.822594	0	0	0.128468	0	0	0	0
A0A2R8Y880;Q7Z6E9;Q7Z6E9-2	0.00126546	0.0110667	0.00390662	0.00489943	0.0160238	0.153979	0.000659058	0.119817	0.287052	0.00149849	0.0332072	0.366625	0	0	0	0	0	0.16602	0	0.129187	0.309499	0	0	0.395294
A0A2R8Y8E0;A0A2U3TZI2;H7C560;P15056	0.00516852	0.00354017	0.00438763	0.00397211	0.00639562	0.00110804	0.00251486	0.00448063	0.0172969	0.00297143	0.875728	0.0724359	0	0	0	0	0	0	0	0	0	0	1	0
A0A2R8YCJ8;Q5T2H3;Q5T2H4;Q9NVV5;Q9NVV5-1;Q9NVV5-3;Q9NVV5-4	0.0552245	0.0159108	0.0175861	0.0114625	0.175531	0.00736986	0.498749	0.150249	0.0123742	0.0536342	0.00100588	0.000903376	0	0	0	0	0.212887	0	0.604889	0.182224	0	0	0	0
A0A2R8YCL1;Q13322;Q13322-2;Q13322-3;Q13322-4	0.00104651	0.00110079	0.398806	0.255286	0.0810582	0.0430272	0.105492	0.00402772	0.00435647	0.0030539	0.00741331	0.0953317	0	0	0.542483	0.347257	0.110261	0	0	0	0	0	0	0
A0A2R8YCS7;Q9Y3Z3	0.111752	0.00422787	0.0803259	0.0377852	0.00363703	0.0761432	0.0363647	0.109112	0.240199	0.166899	0.101373	0.0321811	0.142462	0	0.1024	0	0	0.097068	0	0.139097	0.306208	0.212765	0	0
A0A2R8YCV2;Q8NCS4	NaN	NaN	NaN	NaN	NaN	NaN	NaN	NaN	NaN	NaN	NaN	NaN	NaN	NaN	NaN	NaN	NaN	NaN	NaN	NaN	NaN	NaN	NaN	NaN
A0A2R8YD49;Q9H1P3;Q9H1P3-2	0.0383132	0.574537	0.0241159	0.00269386	0.00146018	0.00786762	0	0.0359463	0.0827041	0.0394925	0.0954086	0.0974605	0	0.874165	0	0	0	0	0	0	0.125835	0	0	0
A0A2R8YD71;P49281-2	0.0150144	0.00647434	0.0203612	0.0226018	0.0162529	0.0435445	0.555322	0.107236	0.00628516	0.197973	0.00295802	0.00597589	0	0	0	0	0	0	0.645324	0.124616	0	0.230059	0	0
A0A2R8YDB8;H7BXF5;Q9H0E3;Q9H0E3-3	0.0362784	0.10189	0.172928	0.00187403	0.0193574	0.000930229	0.00683548	0.0238188	0.237492	0.00569639	0.00771572	0.385183	0	0.113528	0.192679	0	0	0	0	0	0.264617	0	0	0.429176
A0A2R8YDE6;Q9UBN7;Q9UBN7-2	0.0034471	0.00432694	0.00968498	0.0496191	0.0121917	0.0912793	0.00323118	0.0039091	0.00547808	0.00617064	0.690693	0.119969	0	0	0	0	0	0.101203	0	0	0	0	0.765785	0.133012
A0A2R8YDQ0;Q9H267	0.00811726	0.00328329	0.00392552	0.0379945	0.0067516	0.00377868	0.00233882	0.00488533	0.00634921	0.00295213	0.791747	0.127877	0	0	0	0	0	0	0	0	0	0	0.860947	0.139053
A0A2R8YDR8;Q9BZD2;Q9BZD2-2	0.0275709	0.00769849	0.0095988	0.0789581	0.0558134	0.0253028	0.423587	0.0854367	0.0151573	0.228997	0.0064203	0.0354589	0	0	0	0.100283	0.0708871	0	0.537987	0	0	0.290844	0	0
A0A2R8YDT1;P15104	0.00398989	0.00513307	0.00396517	0.00430291	0.00676875	0.00685779	0.005399	0.0025467	0.00540112	0.00319079	0.041612	0.910833	0	0	0	0	0	0	0	0	0	0	0	1
A0A2R8YE63;Q12929	0.00272507	0.00368311	0.0241992	0.0475755	0.00219694	0.0270915	0.00324116	0.0065043	0.0219001	0.0115283	0.778078	0.0712767	0	0	0	0	0	0	0	0	0	0	1	0
A0A2R8YE77;A0A2U3TZM1;O14936;O14936-3	0.107597	0.0290311	0.158887	0.0621442	0.0107872	0.0282997	0.094152	0.260105	0.0695695	0.0677067	0.0810507	0.0306693	0.180484	0	0.266518	0	0	0	0	0.436302	0.116696	0	0	0
A0A2R8YEC9;O00462	0.0748287	0.0098547	0.00690019	0.00729609	0.00321798	0.00994606	0.0133772	0.0229966	0.0652929	0.772238	0.00620433	0.00784766	0	0	0	0	0	0	0	0	0.0779588	0.922041	0	0
A0A2R8YEL6;P48506	0.00209799	0.00368698	0.00603863	0.0127151	0.00304716	0.0198233	0.00239469	0.00252501	0.00437887	0.00333839	0.820463	0.11949	0	0	0	0	0	0	0	0	0	0	1	0
A0A2R8YEM2;P51946	0.0306751	0.00290898	0.00742128	0.00906132	0.216734	9.72785e-06	0.000926609	0.000562349	0.201966	0.0192124	0.385169	0.125354	0	0	0	0	0.233242	0	0	0	0.217349	0	0.414507	0.134902
A0A2R8YEM9;O15050	0.00326901	0.00937282	0.011605	0.0130765	0.334948	0.467148	0.0172286	0.00366555	0.120739	0.00110442	8.26435e-05	0.0177592	0	0	0	0	0.362956	0.506209	0	0	0.130835	0	0	0
A0A2R8YES3;B4DGM3;Q969G3;Q969G3-3;Q969G3-4	0.0233942	0.0229622	0.00636796	0.00191959	0.00493872	0.00499875	0.00234419	0.0782573	0.807127	0.0375038	0.00504566	0.00514078	0	0	0	0	0	0	0	0	1	0	0	0
A0A2R8YEU4	NaN	NaN	NaN	NaN	NaN	NaN	NaN	NaN	NaN	NaN	NaN	NaN	NaN	NaN	NaN	NaN	NaN	NaN	NaN	NaN	NaN	NaN	NaN	NaN
A0A2R8YFH5;Q15437	0.0017603	0.0019213	0.0215807	0.0523992	0.00505486	0.00975016	0.00308819	0.00325413	0.00295211	0.00266337	0.700381	0.195194	0	0	0	0	0	0	0	0	0	0	0.782046	0.217954
A0A2R8YFN3;A1Z1Q3;A1Z1Q3-1	0.0016541	0.0200151	0.0237961	0.0312763	0.0132286	0.00405953	0.00105953	0.136773	0.19092	0.0148161	0.452317	0.110085	0	0	0	0	0	0	0	0.175348	0.244766	0	0.579886	0
A0A2R8YFX5;H0YHA8;Q8IVL0;Q8IVL0-2;Q8IVL0-3	0.0220028	0.0381278	0.0222007	0.0346753	0.0604947	0.391141	0.000365356	0.00396502	0.345206	0.0610534	0.00437231	0.0163953	0	0.0456637	0	0	0.0724514	0.468449	0	0	0.413436	0	0	0
A0A2R8YG42	0.00406684	0.00311966	0.00930524	0.0145969	0.00364514	0.0511938	0.003144	0.00360649	0.0057989	0.0071079	0.215738	0.678678	0	0	0	0	0	0	0	0	0	0	0.241205	0.758795
A0A2R8YGH5;H7C1E4;P61966	0.00591074	0.00103788	0.046897	0.474216	0.0107701	0.0491681	0.00358215	0.0155928	0.00335834	0.00293154	0.189952	0.196584	0	0	0	0.550932	0	0	0	0	0	0	0.220682	0.228386
A0A2R8YHG5;Q9BZV2	0.121145	0.120859	0.0111064	0.430929	0.0181324	0.0219391	0.060912	0.149349	0.0344111	0.0201244	0.00588451	0.00520873	0.147328	0.14698	0	0.524065	0	0	0	0.181627	0	0	0	0
A0A2U3TZH3;Q05639	0.00408134	0.00373485	0.0203503	0.071952	0.00465657	0.0363556	0.00353693	0.00510897	0.00491306	0.00464726	0.557795	0.282868	0	0	0	0	0	0	0	0	0	0	0.663518	0.336482
A0A2U3TZL5;E9PNW4;P13987;P13987-2	0.0521922	0.0482586	0.0960152	0.0672094	0.0445211	0.044017	0.350796	0.213753	0.0759176	0.00382806	0.00234401	0.00114805	0	0.0614963	0.122353	0	0	0	0.447022	0.272387	0.0967423	0	0	0
A0A2U3TZL8;H0YME6;H7BYN4;Q02241;Q02241-2	NaN	NaN	NaN	NaN	NaN	NaN	NaN	NaN	NaN	NaN	NaN	NaN	NaN	NaN	NaN	NaN	NaN	NaN	NaN	NaN	NaN	NaN	NaN	NaN
A0A2U3TZU2;P06744	0.00451517	0.00408217	0.00377345	0.00711152	0.00444725	0.00379076	0.00262868	0.00332574	0.00453328	0.00319289	0.772606	0.185993	0	0	0	0	0	0	0	0	0	0	0.805974	0.194026
A0A2U3TZV8;Q4KWH8;Q4KWH8-2;Q4KWH8-3;Q4KWH8-4	0	0.000958082	0.408703	0.0451598	0.499728	0.0117944	0.00318362	0.02887	0.00160319	0	0	0	0	0	0.4499	0	0.5501	0	0	0	0	0	0	0
A0A2U3U020;P55808-3	0	0.0260344	0.0309262	0.0226919	0.566106	0.14773	0.0209683	0.0518402	0.133353	0.000336331	1.29144e-05	0	0	0	0	0	0.668217	0.174377	0	0	0.157406	0	0	0
A0A2Y9D025;P56556	0.210774	0.653746	0.0274063	0.000768395	0.00162551	0.00330022	0.00790101	0.00418452	0.0219249	0.0413057	0.00675506	0.0203079	0.243805	0.756195	0	0	0	0	0	0	0	0	0	0
A0A384DVK4;Q7Z5L2;Q7Z5L2-2	0.00574211	0.00721685	0.0125833	0.00707816	0.0195188	0.0151619	0.00241987	0.018393	0.0737147	0.00748745	0.250121	0.580563	0	0	0	0	0	0	0	0	0.0815069	0	0.276561	0.641932
A0A384DVU0;Q8IY17;Q8IY17-3	0.0609362	0.00599844	0.0519028	0.0156324	0.0219195	0.0181531	0.69345	0.103154	0.00249003	0.017683	0.00402828	0.00465209	0	0	0	0	0	0	0.870508	0.129492	0	0	0	0
A0A384N5Y3;F5H2F4;V9GYY3	0.00546563	0.00258259	0.0394795	0.154755	0.00175846	0.299684	0.00406793	0.0239193	0.0354264	0.00971722	0.300641	0.122503	0	0	0	0.176343	0	0.341487	0	0	0	0	0.342578	0.139592
A0A3B3IRI0	0.048102	0.00190921	0.00505676	0.00453608	0.219094	0.00287906	0.434975	0.0557088	0	0.222857	0.00315068	0.00173177	0	0	0	0	0.249843	0	0.496022	0	0	0.254134	0	0
A0A3B3IRJ9;A0A3B3ITL0;Q9Y2H2	0.00273372	0.0107451	0.533196	0.00838367	0.0114779	0.00582881	0.00895994	0.00298834	0.0592649	0.0703302	0.231129	0.0549617	0	0	0.647405	0	0	0	0	0	0.0719591	0	0.280636	0
A0A3B3IRL2;O75629	0.0397154	0.0122067	0.00498321	0.00609377	0.00423353	0.00939264	0.0780861	0.019381	0.0101854	0.809004	0.00356279	0.00315502	0	0	0	0	0	0	0	0	0	1	0	0
A0A3B3IRM4;O75191	0.0139032	0.00378448	0.00387273	0	0.0169767	0	0.0036756	0.000992391	0.145421	0.00764282	0.0888829	0.714848	0	0	0	0	0	0	0	0	0.169041	0	0	0.830959
A0A3B3IRM5;P46439;Q5T8R1	0.00619728	0.00323723	0.00646852	0.00652908	0.00891888	0.00195094	0.00189959	0.00836997	0.262614	0.00626513	0.627586	0.0599636	0	0	0	0	0	0	0	0	0.295006	0	0.704994	0
A0A3B3IRN8;A0A3B3ITX0;P24311	0.0812313	0.834597	0.00574513	0.00469858	0.00273607	0.00299353	0.00429123	0.013603	0.0050241	0.0312794	0.0054936	0.00830694	0	1	0	0	0	0	0	0	0	0	0	0
A0A3B3IRQ9	0.00338076	0.0108898	0.219217	0.00130332	0.0413657	0.216077	0.00308355	0.00933011	0.480134	0.00226634	0.00535169	0.00760052	0	0	0.23947	0	0	0.236039	0	0	0.524491	0	0	0
A0A3B3IRR1;A0A3F2YNY7;P08397;P08397-2	0.00980435	0.00433582	0.097349	0.0330983	0.00425495	0.00455432	0.00257604	0.00754299	0.013267	0.00313917	0.803454	0.0166243	0	0	0.108069	0	0	0	0	0	0	0	0.891931	0
A0A3B3IRV1	0.00710096	0.00688009	0.0543373	0.0067229	0.00644079	0.00345269	0.00323569	0.019823	0.0218074	0.00214329	0.868013	4.34175e-05	0	0	0	0	0	0	0	0	0	0	1	0
A0A3B3IRX2;P14555	NaN	NaN	NaN	NaN	NaN	NaN	NaN	NaN	NaN	NaN	NaN	NaN	NaN	NaN	NaN	NaN	NaN	NaN	NaN	NaN	NaN	NaN	NaN	NaN
A0A3B3IS71;P06400	0.00692503	0.00534952	0.00511241	0.00293362	0.0103796	0.0360511	0.0140471	0.0689497	0.799551	0.0258353	0.005145	0.0197209	0	0	0	0	0	0	0	0	1	0	0	0
A0A3B3ISD1;P11362;P11362-14;P11362-2;P11362-20;P11362-21;P11362-3;P11362-4;P11362-5;P11362-6;P11362-7	0.00362172	0.00322334	0.025691	0.00436076	0.00357182	0.00189871	0.00185818	0.00988713	0.014647	0.0028449	0.639387	0.289008	0	0	0	0	0	0	0	0	0	0	0.688702	0.311298
A0A3B3ISF0;Q659C4;Q659C4-2	0.00144423	0.000559443	0.00446215	0.208449	0.232113	0.467114	0.0344471	0.0148156	0.0089057	0.00291221	0.00214516	0.0226318	0	0	0	0.229651	0.255723	0.514626	0	0	0	0	0	0
A0A3B3ISF6	0.00165078	0.0191569	0.0134786	0.0747956	0.301331	0.0325864	0.336953	0.0351194	0.00126667	0.00484329	0.000876468	0.177943	0	0	0	0	0.369176	0	0.412818	0	0	0	0	0.218006
A0A3B3ISF9;P42892;P42892-3;P42892-4	0.00210856	0.00087164	0.00930266	0.619479	0.119686	0.0445184	0.141609	0.0205838	0.00690743	0.0296482	0.00331193	0.00197345	0	0	0	0.838079	0.161921	0	0	0	0	0	0	0
A0A3B3ISG5;P14735	0.0408807	0.072187	0.0471089	0.0397259	0.00388576	0.00648671	0.00545209	0.0269685	0.0326156	0.0293599	0.413183	0.282147	0	0.0940528	0	0	0	0	0	0	0	0	0.538337	0.36761
A0A3B3ISJ2;Q96KQ4	0.0244939	0.0556966	0.41102	0.00439331	0.0087988	0.00201505	0.000464759	0.0104579	0.0142426	0.00477357	0.460808	0.00283484	0	0.0600487	0.443137	0	0	0	0	0	0	0	0.496815	0
A0A3B3ISL7;A0A3B3ITY4;A0A3B3ITZ8;A0A3B3IUC5;Q8N8U9	0.0475484	0.0140003	0.615637	0.00266128	0.0193096	0.00222986	0.217746	0.0239291	0.0478955	0.00406334	0.00244786	0.00253171	0	0	0.73872	0	0	0	0.26128	0	0	0	0	0
A0A3B3ISL8;G3V2D1;O75582;O75582-2;O75582-3	0.00151415	0.00874819	0.0170459	0.0142792	0.00314808	0.00546919	0.0023135	0.0532639	0.00640443	0.00255551	0.763944	0.121314	0	0	0	0	0	0	0	0	0	0	0.862962	0.137038
A0A3B3ISM6;A0A3B3ITJ2;P10746	0.00890997	0.00116448	0.0426168	0.00388559	0.00458153	9.56821e-05	0.00209251	0.00385488	0.0194898	0.0015725	0.840178	0.071558	0	0	0	0	0	0	0	0	0	0	1	0
A0A3B3ISP1;Q92625	0.00793794	0.0177397	0.0104876	0.0276178	0.00339964	0.00349781	0.00365187	0.00989082	0.00866501	0.00221363	0.836365	0.0685335	0	0	0	0	0	0	0	0	0	0	1	0
A0A3B3ISQ4;Q9H6S3;Q9H6S3-3	0.00787466	0.00704199	0.0123086	0.00309092	0.0168405	0.00572284	0.0024486	0.0118753	0.131515	0.0120609	0.473904	0.315317	0	0	0	0	0	0	0	0	0.142837	0	0.514701	0.342462
A0A3B3ISR2;B4DPQ0;P00736	0.0709098	0.14482	0.459505	0.0027883	0.0151676	0.00237759	0.00441447	0.0573349	0.154968	0.0806212	0.00432159	0.00277168	0	0.172422	0.547086	0	0	0	0	0	0.184505	0.0959874	0	0
A0A3B3ISS6;Q14956;Q14956-2	0.0896687	0.00468281	0.00386313	0.00555055	0.00432746	0.00782682	0.04843	0.0551673	0.0183455	0.757384	0.00216014	0.00259348	0	0	0	0	0	0	0	0	0	1	0	0
A0A3B3IST1;B5MD23;O75954	0.00265489	0.00701768	0.836741	0.00319223	0.0068519	0.00253857	0.00414628	0.00339791	0.12208	0	0.00643444	0.00494501	0	0	0.872677	0	0	0	0	0	0.127323	0	0	0
A0A3B3ISV4	0.0932151	0.0546234	0.0505841	0.00907093	0.0113736	0.00853181	0.629134	0.11131	0.00456192	0.0226694	0.00244211	0.00248375	0	0.0687029	0	0	0	0	0.791296	0.140001	0	0	0	0
A0A3B3ISV5;Q8N9N7	0.00901981	0.00368529	0.0627401	0.0795015	0.00669689	0.00345432	0.00151674	0.0120779	0.0441688	0.00197958	0.704972	0.0701867	0	0	0	0.101344	0	0	0	0	0	0	0.898656	0
A0A3B3ISX9	0.0218563	0.100788	0.210252	0.0121388	0.134366	0.00209232	0.00711569	0.309762	0.00480152	0.163005	0.0262136	0.00760836	0	0.10977	0.22899	0	0.146341	0	0	0.337368	0	0.177531	0	0
A0A3B3ISZ5;Q9UDY2-6	NaN	NaN	NaN	NaN	NaN	NaN	NaN	NaN	NaN	NaN	NaN	NaN	NaN	NaN	NaN	NaN	NaN	NaN	NaN	NaN	NaN	NaN	NaN	NaN
A0A3B3IT31;Q9NUN5;Q9NUN5-3	0.00401554	0.00128172	0.00624124	0.240479	0.0871993	0.0751166	0.488273	0.0613586	0.00233266	0.0293181	0.00326761	0.00111734	0	0	0	0.269877	0.0978593	0.0842996	0.547964	0	0	0	0	0
A0A3B3IT47;Q9Y2I8;Q9Y2I8-2	0.0016731	0.00327366	0.0699701	0.0288058	0.00286477	0.129919	0.00511779	0.00158403	0.0133705	0.00625852	0.0722262	0.664936	0	0	0.0809066	0	0	0.150226	0	0	0	0	0	0.768867
A0A3B3IT54;Q9H7E9;Q9H7E9-2	0.00212586	0.003439	0.00960307	0.255321	0.00803308	0.673595	0.00211089	0.00270141	0.00549063	0.00491933	0.011616	0.0210445	0	0	0	0.274859	0	0.725141	0	0	0	0	0	0
A0A3B3IT64;P98164	0.397775	0.0148228	0.0400649	0.0773277	0.114028	0.143105	0.0359935	0.00272978	0.00943901	0.0051419	0.00220047	0.157372	0.489701	0	0	0	0.140381	0.176176	0	0	0	0	0	0.193742
A0A3B3IT92;A0A3B3IU45;P33991	0.00302714	0.00421359	0.00402283	0.00657124	0.0193633	0.00519809	0.00240697	0.0323006	0.472988	0.436079	0.00475054	0.00907901	0	0	0	0	0	0	0	0	0.5203	0.4797	0	0
A0A3B3IT94;A0A5F9ZGS6;Q5JSC9;Q96LT4;Q96LT4-2	0.00314306	0.0015356	0.0907431	0.000917877	0.457783	0.000727969	0.320696	0.120562	0.000364893	0.00128338	0.00152114	0.000722015	0	0	0.0916797	0	0.462508	0	0.324006	0.121806	0	0	0	0
A0A3B3ITD7;A0A3B3ITI2;E5RHC2;Q96HA8;Q96HA8-2	0.00484917	0.00473583	0.00346954	0.00487023	0.00346643	0.00482967	0.00262508	0.00592465	0.0210756	0.00476458	0.928942	0.0104476	0	0	0	0	0	0	0	0	0	0	1	0
A0A3B3ITG3;H0Y3A3;Q5VWQ8;Q5VWQ8-2;Q5VWQ8-3;Q5VWQ8-4;Q5VWQ8-5	0.00943397	0.0725585	0.413134	0.0164684	0.00408813	0.0240616	0.00115992	0.00479692	0.0611878	0.0183076	0.155519	0.219284	0	0.0787239	0.448238	0	0	0	0	0	0.066387	0	0.168734	0.237917
A0A3B3ITH3;Q9P2X3	0.00947975	0.0815803	0.0185077	0.00772211	0.00494058	0.00472343	0.00307783	0.0621026	0.227363	0.00400733	0.511767	0.0647282	0	0.099402	0	0	0	0	0	0	0.277032	0	0.623566	0
A0A3B3ITK0;P35442	0.136932	0.0348274	0.499741	0.021349	0.00679725	0.0125965	0.00257906	0.0564114	0.215618	0.00158927	0.00564341	0.0059152	0.154356	0.0392591	0.563331	0	0	0	0	0	0.243054	0	0	0
A0A3B3ITK4;Q96LA8;Q96LA8-2	NaN	NaN	NaN	NaN	NaN	NaN	NaN	NaN	NaN	NaN	NaN	NaN	NaN	NaN	NaN	NaN	NaN	NaN	NaN	NaN	NaN	NaN	NaN	NaN
A0A3B3ITL1;Q8WUD1	0.021152	0.00542985	0.0137525	0.0127877	0.205953	0.049417	0.494629	0.136712	0.0123039	0.0433592	0.00245382	0.00205036	0	0	0	0	0.245974	0	0.590747	0.163278	0	0	0	0
A0A3B3ITN6;D6RA89;D6RBB0;O60683;O60683-2	0.453563	0.141075	0.0441931	0.000965804	0.183071	6.73356e-05	0.0186299	0.0306737	0.0139879	0.102791	0.00410736	0.0068746	0.51512	0.160221	0	0	0.207917	0	0	0	0	0.116742	0	0
A0A3B3ITN8;Q8NFJ5	0.00116814	0.217928	0.00277799	0.00319429	0.0452378	0.00949371	0.00073707	0.197432	0.0502541	0.00347986	0.00470084	0.463596	0	0.24794	0	0	0	0	0	0.224621	0	0	0	0.527439
A0A3B3ITP4;Q495G5;Q8IVH4	0.054421	0.885888	0.00715618	0.00372628	0.00245863	0.00320741	0.00514619	0.00851462	0.00728894	0.00718209	0.0064627	0.00854833	0	1	0	0	0	0	0	0	0	0	0	0
A0A3B3ITR4	0.0211842	0.00625041	0.0684798	0.0241486	0.0948662	0.0486236	0.416381	0.179472	0.0714149	0.0576339	0.00906855	0.00247703	0	0	0	0	0.124474	0	0.546336	0.235486	0.0937038	0	0	0
A0A3B3ITT1	0.0149956	0.00231287	0.297008	0.197243	0.0391016	0.0844203	0.136428	0.137861	0.0190488	0.0433154	0.0171839	0.0110821	0	0	0.414508	0.275274	0	0.117818	0	0.1924	0	0	0	0
A0A3B3ITT5;P47914	0.00237989	0.00309487	0.0485037	0.0119003	0.00846751	0.82978	0.0127335	0.00422214	0.0541564	0.00436803	0.00500816	0.0153861	0	0	0	0	0	1	0	0	0	0	0	0
A0A3B3ITU3;Q9H246	0.0641585	0.15816	0.0432183	0	0.222102	0	0.027795	0.316655	0.0862895	0.0742512	0.00245786	0.00491347	0	0.184452	0	0	0.259024	0	0	0.369295	0.100634	0.0865947	0	0
A0A3B3ITU8;A0A3B3IU04;A0A3F2YNW8;Q14643;Q14643-2;Q14643-3;Q14643-4;Q14643-5;Q14643-6;Q14643-7;Q14643-8	0.0520575	0.00911275	0.0155172	0.0102943	0.0133626	0.0169928	0.818787	0.0410731	0.00178335	0.0162393	0.00281879	0.00196098	0	0	0	0	0	0	1	0	0	0	0	0
A0A3B3ITX9	NaN	NaN	NaN	NaN	NaN	NaN	NaN	NaN	NaN	NaN	NaN	NaN	NaN	NaN	NaN	NaN	NaN	NaN	NaN	NaN	NaN	NaN	NaN	NaN
A0A3B3IU42;G5EA29;H0YDP6;H0YEL0;O14893;O14893-2;O14893-3	0.00161767	0.00535951	0.00844797	0.0434206	0.00799725	0.319228	0.00106545	0.00157123	0.130338	0.00540242	0.00779412	0.467757	0	0	0	0	0	0.348	0	0	0.142085	0	0	0.509915
A0A3B3IU69;F8W717;O00423;O00423-3	0.0301014	0.017987	0.0429548	0.246984	0.0613959	0.36079	0.0176339	0.0661605	0.028222	0.00797008	0.0203778	0.0994229	0	0	0	0.36909	0.0917494	0.539161	0	0	0	0	0	0
A0A3B3IUA2	0.00446257	0.00336385	0.0160466	0.0451007	0.00452642	0.00590518	0.00360216	0.00501429	0.0155805	0.00372952	0.659659	0.233009	0	0	0	0	0	0	0	0	0	0	0.738975	0.261025
A0A3B3IUB1;Q13144	0.00142246	0.00336791	0.00922733	0.203997	0.0104365	0.720134	0.00774618	0.00511853	0.00431399	0.00496676	0.00857205	0.0206973	0	0	0	0.220745	0	0.779255	0	0	0	0	0	0
A0A3B3IUB5;Q8TCT9;Q8TCT9-5	0.0111237	0.00373804	0.00876353	0.0104551	0.0251396	0.0124891	0.876678	0.0295563	0.00215772	0.0149505	0.00275604	0.0021927	0	0	0	0	0	0	1	0	0	0	0	0
A0A3B3IUC4;A0A6Q8PFA9;P06280	0.062357	0.0159157	0.00426399	0.00591586	0.00467692	0.0077736	0.0106539	0.00525253	0.0163886	0.860741	0.00304678	0.00301419	0	0	0	0	0	0	0	0	0	1	0	0
A0A3B3IUD7;Q14690	0.0372411	0.00847735	0.178809	0.0697064	0.0947885	0.0112587	0.00196977	0.00629184	0.097286	0.0176984	0.306934	0.169539	0	0	0.21102	0	0.111864	0	0	0	0.114811	0	0.362225	0.20008
A0A494BXY3;E9PLD3;E9PRG8	0.00263259	0.00397547	0.0172996	0.011139	0.0143824	0.570972	0.190119	0.00250048	0.169981	0.00156968	0.00600329	0.00942562	0	0	0	0	0	0.770591	0	0	0.229409	0	0	0
A0A494BZV2	0.00778657	0.00294514	0.192921	0.0374781	0.00459708	0.0751482	0.00195213	0.0287788	0.169262	0.00209507	0.384784	0.0922522	0	0	0.234664	0	0	0.0914083	0	0	0.205886	0	0.468041	0
A0A494BZW8;A0A494C0B6;A0A494C0J9;A0A499FJL5;C9J8C7;E7ERD7;Q9UKU0;Q9UKU0-1;Q9UKU0-3;Q9UKU0-5;Q9UKU0-6;Q9UKU0-7;Q9UKU0-8;Q9UKU0-9	0.020776	0.0268343	0.00531288	0.0366791	0.0145168	0.0194204	0.657897	0.023673	0.0036814	0.18656	0.00197967	0.00266966	0	0	0	0	0	0	0.779077	0	0	0.220923	0	0
A0A494BZZ2;H0YK48;H0YKJ4;P09493-5	0.00769253	0.00307257	0.0224299	0.0270897	0.00380392	0.00585957	0.00505782	0.0472088	0.0125253	0.0055851	0.837026	0.0226486	0	0	0	0	0	0	0	0	0	0	1	0
A0A494BZZ8;Q96K49;Q96K49-2	0.00308126	0.000848797	0.00801166	0.103479	0.428188	0.0247663	0.137343	0.00970076	0.00115407	0.00103934	0.000920486	0.281468	0	0	0	0.127259	0.52659	0	0	0	0	0	0	0.346151
A0A494C004;A0A494C0C5;A0A494C0V5;A0A494C141;A0A499FJ53;A6XNE1;F6Y2X3;Q16635;Q16635-2;Q16635-3;Q16635-4;Q16635-5;Q16635-6;Q16635-7;Q16635-8;Q16635-9	0.154972	0.775859	0.00533264	0.00328599	0.00297663	0.00289441	0.0106259	0.0154696	0.0052514	0.010347	0.00489234	0.00809325	0.166488	0.833512	0	0	0	0	0	0	0	0	0	0
A0A494C028;H0Y993;P35659	0.0161955	0.00379113	0.098429	0.0444608	0.0229392	0.0711393	0.0155758	0.0532648	0.531862	0.0643386	0.0472857	0.0307183	0	0	0.156164	0	0	0	0	0	0.843836	0	0	0
A0A494C050;Q5M9Q1;Q8N5F7	0.00476075	0.281776	0.00498886	0.00334619	0.00505048	0.00489525	0.00474555	0.0150354	0.615837	0.045788	0.00603351	0.0077429	0	0.313917	0	0	0	0	0	0	0.686083	0	0	0
A0A494C060	0.0441865	0.135611	0.0330529	0.0867831	0.0262045	0.0226687	0.0465949	0.183811	0.337175	0.0471369	0.0147051	0.0220698	0	0.182424	0	0.116741	0	0	0	0.247264	0.45357	0	0	0
A0A494C066;B7Z4W5;Q16773	0.00652705	0.00657664	0.00695089	0.00548517	0.00303134	0.00121362	0.00240633	0.00887669	0.0143762	0.00605631	0.838093	0.100407	0	0	0	0	0	0	0	0	0	0	1	0
A0A494C068;A0A494C1K7;E9PGP6;Q9UGJ0;Q9UGJ0-2;Q9UGJ0-3	0.00200538	0.00205986	0.0405909	0.0337469	0.00498898	0.13498	0.0062823	0.00115878	0.010767	0.00217589	0.0272153	0.734029	0	0	0	0	0	0.155326	0	0	0	0	0	0.844674
A0A494C070;H0Y6K5;H0Y7L6;Q02447;Q02447-2;Q02447-3;Q02447-4;Q02447-5;Q02447-6	0.0186785	0.0578923	0.408019	0.000997241	0.00506838	0.00496342	0.00240697	0.0153687	0.472395	0.00324261	0.00538275	0.00558458	0	0.0616987	0.434846	0	0	0	0	0	0.503455	0	0	0
A0A494C0D8;Q75N90	0.329217	0.0288072	0.0722986	0.00254003	0.0203119	0.0028438	0.00121474	0.00854917	0.319823	0.20472	0.00371778	0.00595716	0.355503	0	0.0780714	0	0	0	0	0	0.345359	0.221066	0	0
A0A494C0G1;O95394;O95394-4	0.00410692	0.00489369	0.00441024	0.266162	0.008889	0.0230876	0.00471049	0.0134744	0.201143	0.00796037	0.380557	0.0806046	0	0	0	0.313922	0	0	0	0	0.237236	0	0.448843	0
A0A494C0M1;P52701	0.00489309	0.0122701	0.00683467	0.118298	0.0282081	0.0212977	0.00648683	0.0167195	0.412532	0.0112828	0.0178289	0.343348	0	0	0	0.135325	0	0	0	0	0.471909	0	0	0.392766
A0A494C0N4;Q7Z4L5	0.0118578	0.00203641	0.0600332	0.135738	0.00968789	0.508104	0.0192615	0.0224813	0.0467442	0.0133713	0.00983926	0.160845	0	0	0	0.168684	0	0.631431	0	0	0	0	0	0.199885
A0A494C0P1;P04150;P04150-10;P04150-8	0.00864233	0.0172628	0.0268399	0.00232369	0.00269175	0.0310652	0.00074534	0.0210573	0.332329	0.00235426	0.350705	0.203983	0	0	0	0	0	0	0	0	0.374659	0	0.395376	0.229965
A0A494C0Q8;P06132	0.00526686	0.00424892	0.00523659	0.00844963	0.00355677	0.00446695	0.00275572	0.0059705	0.00991943	0.00356453	0.919754	0.0268096	0	0	0	0	0	0	0	0	0	0	1	0
A0A494C0R7;O43734;O43734-2;O43734-3;O43734-4;O43734-5	0.00528916	0.00433772	0.00408976	0.0207806	0.00904432	0.0015514	0.00187719	0.00631369	0.054709	0.00789674	0.552822	0.331289	0	0	0	0	0	0	0	0	0	0	0.625286	0.374714
A0A494C0R8	0.0119595	0.000364469	0.0912137	0.149244	0.00516263	0.102988	0.0161987	0.0232395	0.0293429	0.0162261	0.329622	0.224438	0	0	0.10163	0.166288	0	0.114749	0	0	0	0	0.367264	0.250069
A0A494C0S0;Q9H3E2	0.00489814	0.00651216	0.015258	0.0153797	0.43228	0.010733	0.250104	0.0171055	0.229318	0.00931624	0.00294614	0.00614902	0	0	0	0	0.474146	0	0.274327	0	0.251527	0	0	0
A0A494C0T3;E9PFV2;P37231;P37231-2	0.208636	0.00482174	0.00466416	0.0058366	0.00370617	0.0118305	0.00470019	0.0204201	0.148608	0.0138748	0.543129	0.0297726	0.231722	0	0	0	0	0	0	0	0.165052	0	0.603226	0
A0A494C0V9;B8ZZ87;H7BZ50;H7C173;H7C202;Q6NZ67;Q6P582	NaN	NaN	NaN	NaN	NaN	NaN	NaN	NaN	NaN	NaN	NaN	NaN	NaN	NaN	NaN	NaN	NaN	NaN	NaN	NaN	NaN	NaN	NaN	NaN
A0A494C0Y9	0.00172352	5.61532e-05	0.00804942	0.00813119	0.0886327	0.107914	0.120896	0.332237	0.11963	0.205522	0.00302124	0.00418739	0	0	0	0	0.103793	0.126372	0	0.389065	0.140093	0.240677	0	0
A0A494C0Z5;Q9H082	0.0189996	0.00485864	0.0862764	0.0506363	0.130407	0.0294502	0.493055	0.168401	0.00429195	0.00781588	0.00321768	0.00258998	0	0	0.098249	0	0.148504	0	0.561477	0.19177	0	0	0	0
A0A494C105;Q9H3U5;Q9H3U5-3;Q9H3U5-5;Q9H3U5-6	0.030425	0.00381722	0.00970604	0.0436549	0.0264855	0.0257317	0.479936	0.0578975	0.0111054	0.299554	0.0033463	0.00834	0	0	0	0	0	0	0.615705	0	0	0.384295	0	0
A0A494C108;Q8N9T8	0.00756035	0.0801021	0.00386647	0.00334619	0.00527139	0.00534041	0.00359937	0.0129236	0.837055	0.0298773	0.00441085	0.00664724	0	0.0873375	0	0	0	0	0	0	0.912663	0	0	0
A0A494C120;Q9HA38;Q9HA38-2	0.00195478	0.000660787	0.00613463	0.158002	0.0643286	0.443101	0.0026508	0.000775065	0.299958	0.00478106	0.00599831	0.0116555	0	0	0	0.163666	0.0666349	0.458987	0	0	0.310712	0	0	0
A0A494C143;Q14689;Q14689-6	0.00498857	0.00432431	0.144533	0.0452099	0.00137323	0.0563269	0.00381629	0.0027603	0.110222	0.00453756	0.45892	0.162989	0	0	0.164867	0	0	0	0	0	0.125729	0	0.523485	0.18592
A0A494C146;P50336	0.0825416	0.549662	0.00387091	0.110136	0.00384061	0.00563393	0.00880173	0.0798825	0.0752336	0.0598209	0.0151984	0.00537761	0	0.747807	0	0.149839	0	0	0	0	0.102354	0	0	0
A0A494C164;P52630;P52630-4	0.00403239	0.00409162	0.0322777	0.0133136	0.00265763	0.0339394	0.00258096	0.00744085	0.0428245	0.00617109	0.742061	0.108609	0	0	0	0	0	0	0	0	0	0	1	0
A0A494C165;P12955	0.0035636	0.00368769	0.00562419	0.00664234	0.00372837	0.0144654	0.0030163	0.00446159	0.00685917	0.00306697	0.817256	0.127628	0	0	0	0	0	0	0	0	0	0	0.864927	0.135073
A0A494C167;Q9UHD2	0.00377798	0.00514085	0.00824352	0.143629	0.00531119	0.00738399	0.00284908	0.00683099	0.134232	0.00203916	0.485985	0.194577	0	0	0	0.14986	0	0	0	0	0.140055	0	0.507067	0.203018
A0A494C1F2;P35658;P35658-2;P35658-3;P35658-4;P35658-5	0.0214232	0.0336654	0.110169	0.0212354	0.244772	0.00740213	0.000426672	0.0978201	0.256359	0.0282015	0.115158	0.0633673	0	0.0453232	0.148319	0	0.329533	0	0	0.131694	0.345131	0	0	0
A0A494C1J1;Q69YQ0;Q69YQ0-2	0.00500768	0.00358712	0.119404	0.185961	0.00810795	0.0300595	0.00860443	0.0141308	0.00645276	0.0043825	0.346053	0.268249	0	0	0.129834	0.202204	0	0	0	0	0	0	0.376281	0.291681
A0A494C1K3;P78347;P78347-2;P78347-3;P78347-4	0.0398085	0.00804298	0.0380686	0.0726902	0.00157304	0.0320595	0.0149211	0.09436	0.441896	0.112068	0.107634	0.0368778	0	0	0	0	0	0	0	0.145545	0.681598	0.172858	0	0
A0A494C1L5	0.00602524	0.00046851	0.0739721	0.073702	0.00324231	0.035476	0.00186209	0.00731844	0.0693515	0.00243193	0.551647	0.174503	0	0	0.0850769	0	0	0	0	0	0.0797627	0	0.634461	0.2007
A0A494C1M4;Q3SY69	0.00960236	0.0472054	0.00793716	0.0265841	0.00614967	0.00151412	0.00151667	0.0054771	0.013628	0.0158124	0.493135	0.371438	0	0.0517729	0	0	0	0	0	0	0	0	0.540849	0.407378
A0A494C1N0;P26885	0.0273039	0.0143871	0.01438	0.0214115	0.0121079	0.0546672	0.731119	0.0493819	0.00994275	0.059147	0.00303818	0.00311344	0	0	0	0	0	0	1	0	0	0	0	0
A0A494C1V1;H0Y764;Q6ZNJ1;Q6ZNJ1-2;Q6ZNJ1-3	0.00482857	0.00453867	0.476951	0.00646405	0.00858657	0.0049813	0.00888021	0.0120681	0.454586	0.00212739	0.00852152	0.00746677	0	0	0.512004	0	0	0	0	0	0.487996	0	0	0
A0A499FI31;Q15020	0.0495887	0.00848835	0.0317245	0.00163817	0.00261241	0.0057665	0.00207081	0.0626541	0.553646	0.163994	0.110597	0.00721918	0	0	0	0	0	0	0	0	0.771481	0.228519	0	0
A0A499FIS5;A0A499FJN1;A0A499FJS1;Q9BUB5;Q9BUB5-2;Q9BUB5-3	0.0492634	0.885437	0.00438322	0.00337042	0.00235678	0.00339612	0.00523102	0.00892836	0.00493828	0.0190929	0.00571735	0.0078852	0	1	0	0	0	0	0	0	0	0	0	0
A0A499FIX8;A0FGR8-2;H7BXI1	0.00662243	0.00476349	0.0258485	0.0342405	0.0727772	0.0523604	0.715104	0.0721564	0.00168266	0.010214	0.00262172	0.00160859	0	0	0	0	0.0923708	0	0.907629	0	0	0	0	0
A0A499FIZ0	0.00284548	0.00355098	0.0154398	0.134393	0.00753904	0.156755	0.00946333	0.00967411	0.0319341	0.0381743	0.0177148	0.572516	0	0	0	0.155608	0	0.1815	0	0	0	0	0	0.662892
A0A499FJ16;A0A5F9ZGX5;A0A5F9ZHB0;A0A5F9ZHJ2;A0A5F9ZHL4;A0A5F9ZHP4;A0A5F9ZHQ1;A0A5F9ZI29;C9J1X3;Q07912;Q07912-2;Q07912-3	0.0251463	0.00158243	0.0102022	0.00596117	0.627099	0.00176216	0.221889	0.048525	0.0494909	0.0031143	0.000598228	0.00462904	0	0	0	0	0.738643	0	0.261357	0	0	0	0	0
A0A499FJI4;O75592;O75592-2	0.002542	0.00579469	0.0073987	0.0759836	0.00815739	0.818195	0.0376137	0.00156783	0.00623395	0.00598784	0.00423074	0.0262947	0	0	0	0	0	1	0	0	0	0	0	0
A0A499FJK2;P01137	0.0299128	0.0457554	0.163126	0.00530584	0.00375922	0.00600272	0.00352819	0.00200098	0.468404	0.0316897	0.233653	0.00686196	0	0.0502288	0.179074	0	0	0	0	0	0.514199	0	0.256497	0
A0A4W8VYG7;A0A4W8W4R1;Q99674	0.00327241	0.228072	0.00357534	0.192133	0.268546	0.0373016	0.217081	0.0220358	0.0121794	0.00226419	0.00325224	0.0102868	0	0.251782	0	0.212107	0.296463	0	0.239648	0	0	0	0	0
A0A590UJ43;P48729;P48729-3;U3KPX3	0.0109775	0.00500664	0.0606514	0.126371	0.00334488	0.205162	0.00926655	0.0137429	0.0257487	0.00932938	0.204156	0.326243	0	0	0	0.146614	0	0.238026	0	0	0	0	0.236858	0.378502
A0A590UJ57;A0A590UJ98;A0A590UJF9;A0A590UJH5;A0A590UJJ8;A0A590UJT0;A0A590UK53;A0A590UK84;A0A590UK97;A0A590UKB1;E9PP15;Q14114;Q14114-2;Q14114-3;Q14114-4	0.00848701	0.0070531	0.345541	0.00358286	0.0149837	0.00184982	0.0113396	0.0114648	0.179235	0.00166827	0.00640663	0.408388	0	0	0.37029	0	0	0	0	0	0.192072	0	0	0.437638
A0A590UJ74;Q9UPY6;Q9UPY6-2	0.00418927	0.00473717	0.00286826	0.0137425	0.0100398	0.000801923	0.00686597	0.00192381	0.0194516	0.00135746	0.438174	0.495849	0	0	0	0	0	0	0	0	0	0	0.469125	0.530875
A0A590UJA9;C9JCW7;C9JE12;Q9BVT8	0.00939052	0.00615573	0.0101609	0.011473	0.0424823	0.0259625	0.793288	0.0377208	0.00285225	0.0540958	0.00274327	0.00367457	0	0	0	0	0	0	1	0	0	0	0	0
A0A590UJB6;A0A590UJJ4;A0A5F9UN28;Q13303;Q13303-2;Q13303-3;Q13303-4;Q13303-5	0.136169	0.171565	0.106835	0.00839271	0.0427331	0.0104522	0.174025	0.0898698	0.136259	0.024912	0.01371	0.0850771	0.212532	0.267779	0.166747	0	0	0	0	0.140269	0.212674	0	0	0
A0A590UJF0	0.129245	0.0175686	0.0558209	0.110175	0.0990684	0.0121703	0.326494	0.208774	0.0258196	0.00333475	0.00719616	0.00433352	0.147919	0	0	0.126094	0.113382	0	0.373667	0.238938	0	0	0	0
A0A590UJG2;Q9UPN3-2;Q9UPN3-3	0.00613027	0.00350131	0.00985017	0.12334	0.00558705	0.318818	0.00883064	0.00530613	0.0155746	0.0109332	0.0206414	0.471487	0	0	0	0.134998	0	0.348952	0	0	0	0	0	0.51605
A0A590UJI0;H0YDE5;Q6ZVL6	0.000458927	0.124273	0.0439839	0.00517418	0.289405	0.0859379	0.0693142	0.00224262	0.0582048	0.00261167	0.0104836	0.30791	0	0.143547	0	0	0.33429	0.0992663	0	0	0.067232	0	0	0.355665
A0A590UJK3;Q14BN4;Q14BN4-2;Q14BN4-3	0.0500787	0.151481	0.0185732	0.00413398	0.327064	0.0240057	0.157985	0.11878	0.00322541	0.117798	0.00354145	0.0233341	0	0.211825	0	0	0.457354	0	0	0.166097	0	0.164724	0	0
A0A590UJK4;A0A590UJP7;A0A590UK01;A0A590UK80;Q13247;Q13247-3	0.00249833	0.00770917	0.0129395	0.0235353	0.00679374	0.60937	0.00289953	0.00364473	0.0314124	0.00766495	0.0324451	0.259087	0	0	0	0	0	0.70167	0	0	0	0	0	0.29833
A0A590UJL0;P08842	0.0123704	0.00292398	0.00747526	0.0121622	0.0108966	0.0392419	0.667876	0.0156467	0.00315632	0.2229	0.00266202	0.00268911	0	0	0	0	0	0	0.749769	0	0	0.250231	0	0
A0A590UJR3;Q13616	0.00647602	0.00252138	0.0465645	0.106624	0.00581772	0.0193683	0.00716657	0.00703092	0.00985919	0.0084616	0.420984	0.359126	0	0	0	0.120243	0	0	0	0	0	0	0.474758	0.404999
A0A590UJS4;Q6KC79;Q6KC79-2	0.0776425	0.0123529	0.0344367	0.00301442	0.0120031	0.0053539	0.00239694	0.0718256	0.766331	0.00800146	0.00421974	0.00242186	0	0	0	0	0	0	0	0	1	0	0	0
A0A590UJS8;A0A5F9ZA98;O75027;O75027-2	0.124876	0.566139	0.035671	0.00718105	0.00223938	0.00516661	0.00959305	0.00930079	0.0747638	0.0151704	0.0496748	0.100224	0.163071	0.739298	0	0	0	0	0	0	0.097631	0	0	0
A0A590UJW0;P20585	0.00334854	0.00356603	0.0114624	0.0454863	0.080748	0.626653	0.0853605	0.00440598	0.117321	0.00915436	0.00362614	0.00886783	0	0	0	0	0.0979094	0.759835	0	0	0.142255	0	0	0
A0A590UJW4;E7EQB3;Q9BSV6	0.0052437	0.00751465	0.0109224	0.124851	0.220098	0.00580664	0.0193882	0.00397517	0.156043	0.0932398	0.289836	0.0630821	0	0	0	0.141223	0.24896	0	0	0	0.176506	0.105467	0.327844	0
A0A590UJW6;A0A5F9XIK1;H3BS18;Q8WYQ9;Q8WYQ9-2	0.0161463	0.00692204	0.0049075	0.00565643	0.0286708	0.321658	0.00334896	0.00234928	0.349409	0.107894	0.00412336	0.148914	0	0	0	0	0	0.346661	0	0	0.376569	0.11628	0	0.16049
A0A5E8;Q99501	0.00199272	0.00466974	0.4	0.100629	0.00743092	0.0157907	0.000294041	0.00162563	0.0183857	0.00036051	0.145586	0.303235	0	0	0.421296	0.105986	0	0	0	0	0	0	0.153337	0.31938
A0A5F9UJV3;Q13367;Q13367-4	0.00464686	0.00679635	0.0808486	0.0630759	0.00589311	0.0132914	0.00469563	0.0165283	0.058865	0.00327793	0.328751	0.41333	0	0	0.0916864	0	0	0	0	0	0.0667559	0	0.372821	0.468737
A0A5F9UK94;H0Y360;Q01433	0.0054719	0.00520468	0.0054406	0.0482944	0.0101504	0.0029503	0.00305175	0.00293305	0.00674894	0.00434689	0.286983	0.618424	0	0	0	0	0	0	0	0	0	0	0.316966	0.683034
A0A5F9UP49;Q9BRK5	0.00826878	0.00232463	0.00924974	0.036311	0.637523	0.00578708	0.189267	0.0817039	0.00327704	0.0231672	0.00181666	0.00130405	0	0	0	0	1	0	0	0	0	0	0	0
A0A5F9UY30;A0A5H1ZRP2;O43493;O43493-3;O43493-5;O43493-7	0.00179938	0.00165344	0.0169259	0.242475	0.328183	0.0982221	0.115252	0.0047373	0.00201145	0.0127886	0.00409371	0.171858	0	0	0	0.288407	0.390352	0.116828	0	0	0	0	0	0.204413
A0A5F9VB99	0.00738013	0.00620684	0.010224	0.00740831	0.0368787	0.0365976	0.840657	0.036957	0.00090237	0.0122802	0.00285947	0.00164823	0	0	0	0	0	0	1	0	0	0	0	0
A0A5F9YFS9	0.0520992	0.0511731	0.0118091	0.0117061	0.0351628	0.00823207	0.480039	0.0812537	0.00551411	0.258325	0.00187491	0.00281092	0	0.064814	0	0	0	0	0.608	0	0	0.327186	0	0
A0A5F9ZGN6;P05089;P05089-2	0.117589	0.00215836	0.244025	0.0435312	0.019722	0.00780565	0.0949363	0.131728	0.174449	0.161088	0.000553088	0.00241556	0.141865	0	0.294404	0	0	0	0	0.158923	0.210463	0.194345	0	0
A0A5F9ZGS5;A0A5F9ZGZ5;A0A5F9ZH30;A0A5F9ZH70;A0A5F9ZHC9;A0A5F9ZHE4;A0A5F9ZHG3;A0A5F9ZI18	0.0114777	0.00886558	0.0575843	0.043526	0.00357695	0.00602333	0.00561913	0.0803138	0.057473	0.0164711	0.607178	0.101891	0	0	0	0	0	0	0	0	0.0864709	0	0.913529	0
A0A5F9ZGY7	0.00411814	0.00302433	0.00571682	0.00423396	0.0600997	0.00287604	0.0110307	0.022977	0.0120913	0.157432	0.709012	0.00738818	0	0	0	0	0.0648644	0	0	0	0	0.169913	0.765223	0
A0A5F9ZH13;E9PR06;E9PRT0;E9PSB9;Q9NQC8;Q9NQC8-2	0.000725083	0.0068605	0.00346631	0.0272428	0.00587325	0.0669902	0.00225501	0.00194397	0.00340035	0.0013749	0.00325428	0.876613	0	0	0	0	0	0	0	0	0	0	0	1
A0A5F9ZH14;Q3SYG4;Q3SYG4-2;Q3SYG4-3;Q3SYG4-4;Q3SYG4-7	0.000905172	0.0169895	0.0214202	0.13627	0.0226679	0.404922	0.0216486	0.000726512	0.00805485	0.00209798	0.00400653	0.360291	0	0	0	0.151162	0	0.449173	0	0	0	0	0	0.399665
A0A5F9ZH93;A0A5F9ZHX9;Q9UHN1	0.0333597	0.888309	0.00416412	0.00428658	0.00190412	0.00283032	0.00160411	0.00489921	0.00523595	0.0378956	0.00693497	0.00857659	0	1	0	0	0	0	0	0	0	0	0	0
A0A5F9ZHD5;B4DZ60;F6R5I9;P17707	0.0154518	0.00133059	0.02022	0.0130674	0.253599	0.00980491	0.00530501	0.102235	0.448602	0.00631568	0.114516	0.00955315	0	0	0	0	0.31525	0	0	0.127089	0.55766	0	0	0
A0A5F9ZHG7;E9PCH4;Q8TEU7;Q8TEU7-4	0.00684566	0.0203749	0.325472	0.111964	0.0194275	0.103387	0.000246963	0.00505942	0.0185115	0.00146625	0.0320649	0.35518	0	0	0.363249	0.124959	0	0.115387	0	0	0	0	0	0.396405
A0A5F9ZHJ0	0.0360601	0.901651	0.0050352	0.00361551	0.00278531	0.00289198	0.00265407	0.00555248	0.00741566	0.0164979	0.00651505	0.00932527	0	1	0	0	0	0	0	0	0	0	0	0
A0A5F9ZHM4;P07195	0.00441991	0.0037208	0.00370172	0.00662258	0.00390676	0.00301575	0.00289378	0.00326786	0.00383533	0.00315058	0.805693	0.155772	0	0	0	0	0	0	0	0	0	0	0.837985	0.162015
A0A5F9ZHN7;Q9NTJ5	0.00791412	0.0042937	0.00997574	0.00791104	0.0470998	0.0185604	0.841081	0.0493243	0.00116623	0.00804017	0.00291577	0.0017172	0	0	0	0	0.0530295	0	0.94697	0	0	0	0	0
A0A5F9ZHN9;P51648;P51648-2	0.00849486	0.00402916	0.011511	0.0149707	0.0348289	0.0312257	0.841987	0.0311813	0.00196043	0.0143964	0.00275001	0.00266417	0	0	0	0	0	0	1	0	0	0	0	0
A0A5F9ZHP1;Q8N9N2-2	0.00219882	0.00459289	0.00844098	0.0949109	0.00669456	0.82079	0.00704724	0.00289153	0.00529021	0.00595187	0.00551226	0.035679	0	0	0	0.103648	0	0.896352	0	0	0	0	0	0
A0A5F9ZHQ6;A0A6I8PIP2;O75071	0.00429934	0.00186172	0.0201383	0.2303	0.373079	0.0110644	0.138354	0.147052	0.0151106	0.0119919	0.0110284	0.0357206	0	0	0	0.306891	0.497153	0	0	0.195956	0	0	0	0
A0A5F9ZHU3;A0A5K1VW74;Q9Y243;Q9Y243-2	0.00399257	0.0725697	0.0362701	0.0594298	0.0820407	0.00809019	0.0017684	0.0037715	0.0550846	0.0179509	0.204353	0.454679	0	0.0891912	0	0	0.100831	0	0	0	0	0	0.251158	0.558819
A0A5F9ZHU6;A0A6Q8PGB1;A0A6Q8PGP6;A0A6Q8PH24;A0A6Q8PH78;O15078	0.0011172	0.00528535	0.00438372	0.297207	0.0217523	0.00223256	0.00182109	0.00458099	0.170255	0.145896	0.00481932	0.340649	0	0	0	0.311535	0	0	0	0	0.178463	0.152929	0	0.357072
A0A5F9ZHU7;P49643	0.00368318	0.138534	0.00569887	0.00448584	0.0248788	0.00675684	0.00482796	0.124841	0.658983	0.00816931	0.00400662	0.0151341	0	0.150196	0	0	0	0	0	0.13535	0.714454	0	0	0
A0A5F9ZHW1;A0A5F9ZHX2;A0A5F9ZI43;A6NH01;H7BZG6;P56377	0.00361037	0.00364194	0.00513907	0.176044	0.0115854	0.00738793	0.00304791	0.00389007	0.00347072	0.00229023	0.101899	0.677993	0	0	0	0.206131	0	0	0	0	0	0	0	0.793869
A0A5F9ZHY7;Q8WY22	0.00726041	0.0206298	0.0198355	0.00948975	0.310687	0.00724415	0.108841	0.286705	0.211886	0.0149106	0	0.00251033	0	0	0	0	0.383907	0	0	0.354273	0.261821	0	0	0
A0A5F9ZHZ7;A0A669KAW7;A0A669KAW9;A0A669KAY3;A0A669KAZ0;A0A669KBI0;C9J818;C9JX57;D3DSE6;P57076;Q9NX33	0.00307209	0.00790831	0.00517668	0.103446	0.00201136	0.0810205	0.00345643	0.0649971	0.00684345	0.00158568	0.491644	0.228839	0	0	0	0.114312	0	0.0895305	0	0	0	0	0.543283	0.252875
A0A5F9ZI21;Q92974;Q92974-2;Q92974-3;V9GYM8	0.00223179	0.00411573	0.00869645	0.123086	0.00329989	0.793276	0.0146235	0.00412766	0.00712916	0.00626539	0.0117444	0.0214042	0	0	0	0.13432	0	0.86568	0	0	0	0	0	0
A0A5H1ZRP4;Q8WX92;Q8WX92-2	0.00717937	0.00465598	0.0186547	0.2096	0.0145378	0.137595	0.088055	0.105772	0.156129	0.00899603	0.0577456	0.191079	0	0	0	0.261943	0	0.171956	0	0.132187	0.195118	0	0	0.238797
A0A5H1ZRS1	0.000341753	0	0.00978808	0.419954	0.069581	0.439062	0.0111609	0.0289899	0.00131035	0.00291665	0.00606088	0.0108344	0	0	0	0.452245	0.0749313	0.472823	0	0	0	0	0	0
A0A5K1VW60;Q99766	0.0446903	0.889355	0.00741588	0.00469965	0.00238782	0.00322305	0.00471812	0.0123333	0.00702531	0.00931775	0.00617587	0.00865792	0	1	0	0	0	0	0	0	0	0	0	0
A0A5K1VW61;A0A5K1VW71;A0A5K1VW79;A0A5K1VW93;Q7Z5Q1;Q7Z5Q1-3;Q7Z5Q1-4;Q7Z5Q1-5;Q7Z5Q1-6;Q7Z5Q1-7;Q7Z5Q1-8;Q7Z5Q1-9	0.00333116	0.00165544	0.0618106	0.312812	0.06517	0.158202	0.000426653	0.00555072	0.0156852	0.00378699	0.0477805	0.323788	0	0	0	0.363747	0.0757815	0.183962	0	0	0	0	0	0.37651
A0A5K1VW70;P98198;P98198-3	0.00198013	0.020591	0.122328	0.311824	0.119033	0.0720332	0.0187181	0.00517683	0.000152398	0.00339484	0.00374654	0.321023	0	0	0.13993	0.356693	0.136161	0	0	0	0	0	0	0.367216
A0A5K1VW95;P40925;P40925-3	0.00454571	0.00378804	0.00388733	0.00645992	0.00361241	0.00373002	0.00298321	0.00456518	0.00484415	0.00324553	0.888324	0.0700143	0	0	0	0	0	0	0	0	0	0	1	0
A0A669KA35;B1AMG5;Q5JSG7;Q92824;Q92824-2	0.0556715	0.0192511	0.055563	0.0034271	0.0164484	0.00557683	0.264615	0.106278	0.448877	0.015014	0.0034928	0.00578612	0	0	0	0	0	0	0.322792	0.129643	0.547565	0	0	0
A0A669KA36;A0A669KB88;B7ZLR4;E7ET55;F5H562;F5H748;P35670;P35670-2;P35670-4	0	0	0.0043358	0.625409	0.289386	0.0620805	0.00171141	0.0114057	0.000169527	0	0.00498115	0.000521495	0	0	0	0.68366	0.31634	0	0	0	0	0	0	0
A0A669KAV7;A0A669KBG4;A0A669KBH9;B9EGQ5;M0QXA7;O95785-3;O95785-4	0.0412432	0.0488763	0.0209827	0.183718	0.375182	1.38081e-05	0.00637689	0.168	0.145292	0.00352543	0.00173137	0.0050589	0	0.0530648	0	0.199462	0.407333	0	0	0.182397	0.157743	0	0	0
A0A669KAW3;H0Y818;P40692	0.0074697	0.0103875	0.0535719	0.00175754	0.00980712	0.025114	0.0032196	0.0230652	0.775972	0.00230986	0.0785923	0.00873325	0	0	0	0	0	0	0	0	1	0	0	0
A0A669KAX3;O76024	0.018099	0.00374431	0.0091165	0.00851213	0.0159262	0.0243717	0.876492	0.0214709	0.00190707	0.0155886	0.00288251	0.00188876	0	0	0	0	0	0	1	0	0	0	0	0
A0A669KAX4;K4DI93;Q13620;Q13620-1	0.0107135	0.00983287	0.0271574	0.0240881	0.00245079	0.014983	0.00185354	0.01547	0.198655	0.00853246	0.367476	0.318787	0	0	0	0	0	0	0	0	0.22449	0	0.415266	0.360244
A0A669KAX9;Q5T653	0.207905	0.563745	0.00565661	0.00265949	0.00240679	0.00434629	0.112606	0.00819613	0.0078906	0.0765313	0.00395744	0.00410009	0.245118	0.664652	0	0	0	0	0	0	0	0.09023	0	0
A0A669KAY5;A0A669KB27;A0A669KBH7	0.0164402	0.00508064	0.0140173	0.0166669	0.0177119	0.0116019	0.793393	0.106717	0.00163319	0.0125799	0.00277049	0.00138714	0	0	0	0	0	0	0.88144	0.11856	0	0	0	0
A0A669KB05	0.159283	0.0651171	0.0748364	0.000801088	0.226831	0.0205787	0.00221396	0.174478	0.238576	0.0261893	0.0015298	0.00956621	0.169609	0.0693384	0.0796877	0	0.241535	0	0	0.185789	0.254041	0	0	0
A0A669KB10;A0A669KBG8;Q92538;Q92538-2;Q92538-3	0.00230114	0.000253195	0.10085	0.345016	0.0110383	0.0429563	0.00353385	0.0145577	0.000714114	0.00271164	0.290334	0.185734	0	0	0.10939	0.37423	0	0	0	0	0	0	0.314919	0.201462
A0A669KB12;Q09472	0.00947958	0.00142627	0.0137904	0.0402106	0.0161149	0.282128	0.0609476	0.0222297	0.394796	0.12932	0.00885447	0.0207023	0	0	0	0	0	0.349929	0	0	0.489673	0.160398	0	0
A0A669KB29;Q9P0U4;Q9P0U4-2	0.004182	0.00494353	0.133268	0.00348708	0.014103	0.00510136	0.00494537	0.030592	0.698201	0.00499395	0.0859197	0.0102623	0	0	0.16028	0	0	0	0	0	0.83972	0	0	0
A0A669KB53;A0A669KB56;A0A669KB68;A0A669KBA4;A0A669KBI6;J3KPM9;P42224;P42224-2	0.00461458	0.00396484	0.00512182	0.00969574	0.00268139	0.00492191	0.00264539	0.00380019	0.0138649	0.00414014	0.806524	0.138025	0	0	0	0	0	0	0	0	0	0	0.853872	0.146128
A0A669KBD5;A0A669KBI7;Q9UMN6	0.00578665	0.00681093	0.00748329	0.00501928	0.00757572	0.00734287	0.00711833	0.0206381	0.908535	0.0070152	0.00621418	0.0104607	0	0	0	0	0	0	0	0	1	0	0	0
A0A669KBH4;Q14999;Q14999-2	0.00300066	0.0424615	0.0105449	0.0491268	0.00611658	0.00821229	0.00505184	0.00630376	0.0197123	0.0343492	0.419019	0.396101	0	0.049513	0	0	0	0	0	0	0	0	0.488606	0.461881
A0A669KBJ7;Q9H2P0	0.0910286	0.0436269	0.0047975	0.00254778	0.00383249	0.00469384	0.00243541	0.020929	0.79957	0.0141129	0.0056405	0.00678463	0	0.0517399	0	0	0	0	0	0	0.94826	0	0	0
A0A669KBK7;Q5T619	0.00166733	0.00201736	0.00461053	0.0573491	0.169847	0.435774	0.152187	0.0298483	0.101382	0.0395837	0.00271585	0.0030171	0	0	0	0	0.240235	0.616368	0	0	0.143397	0	0	0
A0A669KBL1;Q93009;Q93009-3	0.012958	0.0027271	0.0783766	0.0548508	0.00163335	0.0784558	0.0130959	0.0680998	0.18365	0.0398481	0.347865	0.118439	0	0	0.113862	0	0	0.113977	0	0	0.266799	0	0.505362	0
A0A6E1WCP9;H0YGT3;P11474;P11474-2	0.101258	0.00822557	0.471061	0.00188722	0.00498619	0.00503446	0.00236476	0.0582938	0.336448	0.000968218	0.0057062	0.00376564	0	0	0.583351	0	0	0	0	0	0.416649	0	0	0
A0A6I8PIS1;Q00796	0.0258162	0.0542833	0.12457	0.028523	0.00623637	0.00274207	0.00402676	0.00982601	0.0310805	0.044685	0.559275	0.108936	0	0.0735418	0.168764	0	0	0	0	0	0	0	0.757694	0
A0A6I8PIV1;Q9P2J5	0.00599346	0.00699497	0.0062352	0.029	0.00527999	0.259395	0.0021407	0.00294908	0.0164135	0.00957971	0.00899276	0.647026	0	0	0	0	0	0.286175	0	0	0	0	0	0.713825
A0A6I8PL80;A0A6I8PS19;Q9NVN8	0.00119209	0	0.0086451	0.105225	0.242825	0.225376	0.0369013	0.366137	0.00388258	0.00163248	0.00474969	0.00343411	0	0	0	0.111994	0.258445	0.239873	0	0.389688	0	0	0	0
A0A6I8PRM6;B1ALU3;O95490-2;O95490-5	0.0128513	0.0120282	0.112011	0.0367027	0.0780759	0.0653683	0.0645354	0.0181433	0.00770678	0.00231695	0.253104	0.337156	0	0	0.14354	0	0.100053	0	0	0	0	0	0.324348	0.432059
A0A6I8PRS5;Q8N954	0.00604609	0.00485182	0.0127004	0.00936328	0.00442065	0.00400698	0.00233887	0.00524185	0.0414892	0.00269557	0.894699	0.0121466	0	0	0	0	0	0	0	0	0	0	1	0
A0A6I8PRV1;O75486;O75486-4	0.0115242	0.030066	0.205308	0.00302361	0.00649802	0.00555731	0.00358633	0.0126863	0.704048	0.00508538	0.00564913	0.00696771	0	0	0.225773	0	0	0	0	0	0.774227	0	0	0
A0A6I8PS32;Q99615	0.00990945	0.005609	0.0620964	0.0212518	0.00379899	0.00364164	0.00336827	0.00823099	0.00716706	0.00357503	0.803121	0.0682305	0	0	0	0	0	0	0	0	0	0	1	0
A0A6I8PTZ8;Q9UL18	0.0380488	0.0011151	0.0300337	0.0352296	0.015098	0.222829	0.305501	0.0880837	0.028035	0.225329	0.0061038	0.00459316	0	0	0	0	0	0.264724	0.362939	0.104644	0	0.267693	0	0
A0A6Q8JGF9;I3L1H5;Q9BZG8;Q9BZG8-2;Q9BZG8-3	0.0363027	0.0299502	0.132011	0.0927659	0.0212635	0.00333552	0.00310535	0.0108908	0.0422186	0.00259428	0.504753	0.120809	0	0	0.155246	0.109093	0	0	0	0	0	0	0.59359	0.142072
A0A6Q8JR05;Q6V0I7;Q6V0I7-3	0.0193179	0.113047	0.0119137	0.00280271	0.312018	0.0858438	0.00587944	0.101272	0.0382068	0.0175103	0.0151943	0.276994	0	0.127137	0	0	0.350908	0.0965432	0	0.113894	0	0	0	0.311518
A0A6Q8KRG2;Q08379	0.0117621	0.00244145	0.0046127	0.00485866	0.696742	0.00226269	0.159893	0.0849813	0.00277439	0.0260236	0.00233697	0.00131096	0	0	0	0	1	0	0	0	0	0	0	0
A0A6Q8PEV5;A0A6Q8PF12;A0A6Q8PFB5;A0A6Q8PGX0;A0A6Q8PH03;Q9BYV8	0.0041705	0.00389526	0.0458457	0.210927	0.0183729	0.00292956	0.00264461	0.00558974	0.029837	0.00203701	0.646382	0.0273679	0	0	0	0.246034	0	0	0	0	0	0	0.753966	0
A0A6Q8PEX6;A0A6Q8PFB7;A0A6Q8PG86;A0A6Q8PGW3;A0A6Q8PHF4;O95163	0.00474034	0.00441989	0.0078665	0.0247041	0.00584684	0.00853729	0.00454066	0.00416971	0.00453424	0.00542515	0.0279536	0.897262	0	0	0	0	0	0	0	0	0	0	0	1
A0A6Q8PEZ3;A0A6Q8PFC0;A0A6Q8PFE6;Q9UKA9;Q9UKA9-2;Q9UKA9-3;Q9UKA9-4	0.00940398	0.00177584	0.0276026	0.0596853	0.0145141	0.386698	0.289427	0.0448312	0.0271947	0.114325	0.00917409	0.0153671	0	0	0	0	0	0.489212	0.366155	0	0	0.144633	0	0
A0A6Q8PEZ7;A0A6Q8PG30;A0A6Q8PHQ1;Q96S66	0.010902	0.00488024	0.00948832	0.00576824	0.0195386	0.0215498	0.870011	0.0300048	0.00071776	0.0223797	0.00297138	0.00178807	0	0	0	0	0	0	1	0	0	0	0	0
A0A6Q8PF05;B4DHE8;Q96DH6;Q96DH6-2	0.00647274	0.00133448	0.0182218	0.0418687	0.0172056	0.221358	0.444679	0.0850354	0.00347359	0.148285	0.00654496	0.00552014	0	0	0	0	0	0.271831	0.546072	0	0	0.182096	0	0
A0A6Q8PF23;Q96IV0	0.00223066	0.00393788	0.0211645	0.0239135	0.00797955	0.0082269	0.00385037	0.00463055	0.00269138	0.00618377	0.452431	0.46276	0	0	0	0	0	0	0	0	0	0	0.494357	0.505643
A0A6Q8PF35;A0A6Q8PG85;F5H875;F8VUA2;F8VVT7;Q9HD42	0.0055694	0.00326156	0.0300104	0.0197613	0.00358863	0.00383256	0.00291455	0.00678626	0.0275498	0.00236053	0.887327	0.00703781	0	0	0	0	0	0	0	0	0	0	1	0
A0A6Q8PF40;A0A6Q8PFC4;A0A6Q8PFY7;A0A6Q8PG00;A0A6Q8PG04;A0A6Q8PGS4;A0A6Q8PH27;A0A6Q8PH89;Q92734;Q92734-2;Q92734-3;Q92734-4	0.0058571	0.00337295	0.00936721	0.00994195	0.0036235	0.00393185	0.0030117	0.00523125	0.00588649	0.00312486	0.894182	0.0524693	0	0	0	0	0	0	0	0	0	0	1	0
A0A6Q8PF62;A0A6Q8PG59;A0A6Q8PGP4;A0A6Q8PGY7;A0A6Q8PHC7;A0A6Q8PHH5;Q92562	0.00415546	0.0017291	0.0583523	0.270807	0.00542522	0.10313	0.00965675	0.0174411	0.00988181	0.0155446	0.12938	0.374497	0	0	0	0.361832	0	0.137794	0	0	0	0	0	0.500374
A0A6Q8PF75;A0A6Q8PG39;A4D126;A4D126-2	0.00311539	0.0283975	0.0108958	0.00378551	0.0152223	0.00214848	0.00242273	0.121339	0.0371342	0.00152813	0.559482	0.214529	0	0	0	0	0	0	0	0.135521	0	0	0.624875	0.239604
A0A6Q8PF83;A0A6Q8PGD1;A0A6Q8PH95;D6REX9;Q8N960;Q8N960-2	0.0277867	0.114897	0.0117761	0.0154218	0.230554	0.303653	0.00784931	0.10818	0.102863	0.0133578	0.0157003	0.0479596	0	0.133578	0	0	0.26804	0.353024	0	0.125769	0.119588	0	0	0
A0A6Q8PF94;O15344	0.00161278	0.00166582	0.0668362	0.369415	0.00549775	0.431217	0.0198161	0.0105316	0.00335023	0.00513195	0.0620109	0.0229153	0	0	0	0.461404	0	0.538596	0	0	0	0	0	0
A0A6Q8PFA6;A0A6Q8PH57;O00139;O00139-4;O00139-5	0.00276002	0.00416236	0.0241964	0.158769	0.00300401	0.681232	0.0097672	0.00914259	0.00726634	0.0069803	0.0187727	0.0739467	0	0	0	0.189011	0	0.810989	0	0	0	0	0	0
A0A6Q8PFE4	NaN	NaN	NaN	NaN	NaN	NaN	NaN	NaN	NaN	NaN	NaN	NaN	NaN	NaN	NaN	NaN	NaN	NaN	NaN	NaN	NaN	NaN	NaN	NaN
A0A6Q8PFH3;Q9H5K3	0.0120744	0.1817	0.0613101	0.00310528	0.295224	0.00508212	0.164284	0.255865	0.0026704	0.0166517	0.00103275	0.00100041	0	0.247957	0	0	0.402877	0	0	0.349166	0	0	0	0
A0A6Q8PFI7;A0A6Q8PGP5;A0A6Q8PHJ5;Q96PU5;Q96PU5-2;Q96PU5-3;Q96PU5-5;Q96PU5-6;Q96PU5-7	0.00566061	0.0029965	0.108564	0.065363	0.00524828	0.0134664	0.00734149	0.0393423	0.030016	0.0050069	0.597748	0.119246	0	0	0.153706	0	0	0	0	0	0	0	0.846294	0
A0A6Q8PFJ0;P02545	0.0607333	0.0299872	0.00466913	0.00205184	0.00287593	0.00500717	0.00228299	0.0445395	0.733623	0.102232	0.00748685	0.00451157	0	0	0	0	0	0	0	0	0.877692	0.122308	0	0
A0A6Q8PFK4;P50747	0.0101799	0.0243502	0.0732281	0.065753	0.00409531	0.028018	0.0108665	0.0245785	0.0134128	0.0112715	0.651003	0.0832429	0	0	0.101111	0	0	0	0	0	0	0	0.898889	0
A0A6Q8PFM5;A0A6Q8PG15;O95831;O95831-3	0.0448101	0.87183	0.00492004	0.00459224	0.00219276	0.00352599	0.00569231	0.00596395	0.00572995	0.0367807	0.00582371	0.00813798	0	1	0	0	0	0	0	0	0	0	0	0
A0A6Q8PFP4;H3BNC0;Q9NVM4;Q9NVM4-3;Q9NVM4-4	0.0875661	0.00377136	0.00726642	0.0964649	0.0505886	0.0303509	0	0.00324653	0.0715694	0.00139803	0.541621	0.106157	0	0	0	0.126887	0.0665427	0	0	0	0.0941401	0	0.71243	0
A0A6Q8PFT9;A0A6Q8PG02;A0A6Q8PGB2;A0A6Q8PGW1;Q6UWE0;Q6UWE0-2	0.0013838	0.00288473	0.200086	0.0291234	0.00661402	0.0115418	0.00194366	0.00253389	0.0163456	0.00248904	0.690502	0.034552	0	0	0.224667	0	0	0	0	0	0	0	0.775333	0
A0A6Q8PFU2;E7ESJ3;Q9UPS8;Q9UPS8-2	0.0708705	0.00454385	0.0214568	0.10572	0.162558	0.0053157	0.326786	0.235222	0.0248629	0.0392429	0.0029364	0.000485625	0	0	0	0.127329	0.195786	0	0.393583	0.283302	0	0	0	0
A0A6Q8PFU3;P43034	0.00299736	0.00466809	0.00403723	0.0168516	0.00600826	0.0161655	0.0032965	0.00251885	0.00236628	0.00296616	0.0772248	0.860899	0	0	0	0	0	0	0	0	0	0	0	1
A0A6Q8PG35;A0A6Q8PGB9;A0A6Q8PHF8;E9PKE4;Q9HAB3	0.00442865	0.144791	0.00880127	0.0780249	0.0224397	0.00533662	0.000568579	0.371434	0.0420157	0.309898	0.00281354	0.00944731	0	0.175266	0	0	0	0	0	0.449611	0	0.375123	0	0
A0A6Q8PGI1	NaN	NaN	NaN	NaN	NaN	NaN	NaN	NaN	NaN	NaN	NaN	NaN	NaN	NaN	NaN	NaN	NaN	NaN	NaN	NaN	NaN	NaN	NaN	NaN
A0A6Q8PGJ2;Q9UG01;Q9UG01-2	0.000439354	0.00842711	0.0523949	0.0331972	0.0056031	0.144933	0.00243102	0.000859761	0.0345466	0.00353268	0.00579879	0.707837	0	0	0	0	0	0.169955	0	0	0	0	0	0.830045
A0A6Q8PGU6;Q8NB90	0.00117404	0.00412331	0.00343966	0.0178857	0.00558455	0.111543	0.00159899	0.00206103	0.00285898	0.00247435	0.202417	0.644839	0	0	0	0	0	0.116336	0	0	0	0	0.211116	0.672549
A0A6Q8PGV8;O95140	0.154008	0.724307	0.00622837	0.00455278	0.00466978	0.00508459	0.0194541	0.015674	0.00786797	0.0456197	0.00444394	0.00808966	0.175345	0.824655	0	0	0	0	0	0	0	0	0	0
A0A6Q8PGZ8;P41250	0.00861145	0.00798474	0.0358115	0.0235632	0.00193645	0.00679159	0.00258859	0.00758733	0.0313414	0.0101912	0.673071	0.190521	0	0	0	0	0	0	0	0	0	0	0.779385	0.220615
A0A6Q8PH13;Q86WG5	0.00559977	0.00330318	0.0554322	0.158179	0.00743461	0.395621	0.0278385	0.00867563	0.0102695	0.00989689	0.0165864	0.301164	0	0	0	0.185012	0	0.462734	0	0	0	0	0	0.352253
A0A6Q8PH21;Q9UHW9;Q9UHW9-4;Q9UHW9-5	0.0205387	0.000485312	0.0571637	0.440575	0.112374	0.157611	0.121935	0.034787	0.00576895	0.000978617	0.00429508	0.0434873	0	0	0	0.62004	0.158148	0.221812	0	0	0	0	0	0
A0A6Q8PH68;Q9UGU0;Q9UGU0-2	0.00654004	0.00685348	0.0105475	0.00463001	0.00694464	0.0080369	0.00768865	0.0197331	0.908815	0.00488433	0.00683785	0.0084886	0	0	0	0	0	0	0	0	1	0	0	0
A0A6Q8PH71;A0A6Q8PHA2;A0A6Q8PHG2;Q27J81;Q27J81-2	0.00237623	0.000626302	0.230258	0.296274	0.0677223	0.101206	0.166006	0.114891	0.00107819	0.00353121	0.0115469	0.0044833	0	0	0.284145	0.365612	0.0835715	0.124892	0	0.14178	0	0	0	0
A0A6Q8PHK0;Q14669-2	0.0817469	0.573393	0.0183543	0.00566491	0.00400336	0.00274367	0.007475	0.149831	0.0973513	0.0300344	0.0119863	0.0174161	0	0.69877	0	0	0	0	0	0.182592	0.118638	0	0	0
A0A6Q8PHP0;P49902;P49902-2	0.0033534	0.00327256	0.0054535	0.00896586	0.00343354	0.0209993	0.00285161	0.00377187	0.00478707	0.00308033	0.761078	0.178953	0	0	0	0	0	0	0	0	0	0	0.809631	0.190369
A0AVF1;A0AVF1-2;A0AVF1-3;B7Z2T3;B7Z6R6	0	0.00955412	0.000978659	0.391502	0.0204799	0.556863	0.000892536	0	0.00762916	0	0.00395857	0.00814221	0	0	0	0.412818	0	0.587182	0	0	0	0	0	0
A0AVT1	0.0042886	0.00407296	0.00640332	0.00985908	0.00281251	0.00596681	0.00300211	0.004432	0.00945736	0.00379105	0.853681	0.0922332	0	0	0	0	0	0	0	0	0	0	1	0
A0JLT2;A0JLT2-2;J3KR33	0.00265489	0.00701768	0.836741	0.00319223	0.0068519	0.00253857	0.00414628	0.00339791	0.12208	0	0.00643444	0.00494501	0	0	0.872677	0	0	0	0	0	0.127323	0	0	0
A0JNW5	0.0250804	0.112929	0.0607223	0.137821	0.0545164	0.0144536	0.00698983	0.160295	0.132774	0.047147	0.125397	0.121875	0	0.1568	0	0.191362	0.0756952	0	0	0.222567	0.184354	0	0	0.169221
A0PJW6	0.258267	0.634467	0.00727152	0.00987026	0.0123487	0.00241565	0.00336203	0.0117758	0.00395334	0.039545	0.00591852	0.0108054	0.289299	0.710701	0	0	0	0	0	0	0	0	0	0
A0PJZ3	0.0369851	0.00279886	0.00408947	0.0879457	0.31444	0.113884	0.158397	0.0155448	0.00332117	0.00032369	0.00531654	0.256954	0	0	0	0.113739	0.406661	0.147285	0	0	0	0	0	0.332315
A0PK00	0.0658081	0.0030196	0.036248	0.0952731	0.621988	8.6294e-05	0.0738918	0.0891854	0.0107084	0.00105763	8.35766e-05	0.00265009	0	0	0	0.118139	0.77127	0	0	0.110591	0	0	0	0
A1A4S6	0.00317083	0.0040078	0.0607855	0.207931	0.00745729	0.407771	0.183442	0.0757846	0.00943241	0.00746136	0.0275855	0.00516988	0	0	0	0.337714	0	0.662286	0	0	0	0	0	0
A1A5C7;C9J4Z0	0.0702493	0.0147803	0.00486569	0.0219796	0.667778	0.000870758	0.0104142	0.155955	0.0254048	0.0268989	6.743e-05	0.000735255	0	0	0	0	0.810673	0	0	0.189327	0	0	0	0
A1L0T0	0.0123784	0.00408508	0.0125866	0.0149534	0.0176313	0.0492645	0.819824	0.0400271	0.00149347	0.0225335	0.00287102	0.00235139	0	0	0	0	0	0	1	0	0	0	0	0
A1L188	NaN	NaN	NaN	NaN	NaN	NaN	NaN	NaN	NaN	NaN	NaN	NaN	NaN	NaN	NaN	NaN	NaN	NaN	NaN	NaN	NaN	NaN	NaN	NaN
A1L4H1	0.0100893	0.0106563	0.148733	0.00690808	0.00630658	0.00202093	0.00287866	0.0197643	0.526032	0.00717003	0.0441914	0.21525	0	0	0.167112	0	0	0	0	0	0.591037	0	0	0.24185
A1X283	0.00220797	0.00267509	0.0280825	0.11449	0.00232016	0.0741594	0.00290397	0.00259499	0.00557365	0.00678353	0.584975	0.173234	0	0	0	0.120915	0	0.0783215	0	0	0	0	0.617807	0.182956
A1XBS5;A1XBS5-3;A1XBS5-4	0.0152407	0.0164417	0.0260812	0.0278897	0.133915	0.180541	0.00407498	0.280362	0.15278	0.0448794	0.0922043	0.0255901	0	0	0	0	0.179127	0.241495	0	0.375016	0.204361	0	0	0
A2A274;Q99798	0.0367179	0.894267	0.00509277	0.00389213	0.00240558	0.00336828	0.00561758	0.00701308	0.00641754	0.0211286	0.00610953	0.00796998	0	1	0	0	0	0	0	0	0	0	0	0
A2A2V1;P04156	0.0499903	0.0760587	0.030417	0.00878037	0.0876556	0.0190067	0.347871	0.28691	0.0721229	0.0184311	0.0016829	0.00107297	0	0.0873616	0	0	0.100682	0	0.399568	0.329547	0.082841	0	0	0
A2A2V2;P42696	0.0145321	0.226365	0.0122739	0.00274149	0.0125874	0.0116284	0.00371557	0.145772	0.553795	0.00291178	0.00383918	0.00983845	0	0.244472	0	0	0	0	0	0.157433	0.598094	0	0	0
A2A369;Q8NF50;Q8NF50-2;Q8NF50-3;Q8NF50-4	0.00125115	0.020534	0.00996713	0.0523554	0.585041	0.176127	0.0375272	0.0973447	0.000204745	0.00304008	0.00284891	0.0137595	0	0	0	0	0.681459	0.205153	0	0.113388	0	0	0	0
A2A376;O95786;O95786-2	0.00402089	0.00551167	0.00413231	0.00684201	0.00797722	0.00655446	0.00313846	0.00437198	0.00445513	0.00340194	0.00686586	0.942728	0	0	0	0	0	0	0	0	0	0	0	1
A2AJT9;A2AJT9-2;A2AJT9-3;F2Z385;H7BXX2	0.0523691	0.00454062	0.0157413	0.0036543	0.218414	0.00489525	0.00474555	0.0150578	0.66211	0.0046768	0.00528554	0.00850974	0	0	0	0	0.24805	0	0	0	0.75195	0	0	0
A2RRP1	0.0502643	0.0054512	0.142712	0.0717318	0.00873417	0.0275761	0.317175	0.235229	0.00977139	0.0219405	0.106511	0.00290335	0	0	0.205307	0	0	0	0.45629	0.338403	0	0	0	0
A2RTX5	0.00774246	0.00482479	0.0234469	0.075969	0.00507083	0.300605	0.005103	0.0081659	0.0266923	0.0113316	0.147905	0.383144	0	0	0	0	0	0.361454	0	0	0	0	0.177844	0.460702
A2RU37	0.0547115	0.00207219	0.0077645	0.025305	0.725406	0.00416824	0.111317	0.03957	0.0020462	0.0243062	0.00211519	0.0012173	0	0	0	0	1	0	0	0	0	0	0	0
A2RU67	0	5.29743e-05	0.0699474	0.742309	0.111336	0.06601	0.0024318	0.00230663	0.000915118	0	0.00394045	0.000750743	0	0	0.0757341	0.803719	0.120547	0	0	0	0	0	0	0
A2RUC4	0.00190969	0.00641219	0.00137209	0.00404519	0.00400391	0.00681446	0.0019402	0.00209588	0.00476787	0.00155412	0.234531	0.730554	0	0	0	0	0	0	0	0	0	0	0.243016	0.756984
A2VDJ0;A2VDJ0-3;A2VDJ0-5	0.0276987	0.0446478	0.166348	0.00247041	0.0943747	0.00805786	0.466541	0.164249	0.010168	0.0114598	0.00137521	0.00260862	0	0.0476924	0.177692	0	0.10081	0	0.498356	0.17545	0	0	0	0
A3KFL1;A3KFL2;Q13868;Q13868-3	0.0361788	0.0139108	0.0124812	0.0017632	0.0232658	0.137884	0.00149383	0.0450957	0.621358	0.0145581	0.0792732	0.012737	0	0	0	0	0	0.181607	0	0	0.818393	0	0	0
A3KMH1;A3KMH1-3	0.117049	0.72256	0.00839906	0.00609183	0.00245169	0.00517948	0.0101816	0.011383	0.0481718	0.0168809	0.0420676	0.00958408	0.139409	0.860591	0	0	0	0	0	0	0	0	0	0
A4D1E9	0.19036	0.645355	0.0280672	0.00118116	0.00205414	0.00332898	0.00408922	0.00205443	0.0175227	0.0959947	0.00565207	0.00434107	0.204312	0.692657	0	0	0	0	0	0	0	0.103031	0	0
A4D1P6	0.170096	0.0217985	0.13965	0.0569324	0.0156613	0.0843773	0.255295	0.107306	0.0251956	0.0649486	0.00738057	0.0513586	0.224779	0	0.184545	0	0	0.111503	0.337369	0.141803	0	0	0	0
A4D1S5;A4D1S5-2	0.0161295	0.00478405	0.446539	0.129123	0.0996683	0.0697818	0.0756268	0.0823593	0.0325956	0.0144602	0.0190432	0.00988972	0	0	0.661216	0.1912	0.147585	0	0	0	0	0	0	0
A4D2B0	0.00593248	0.00463435	0.00482297	0.00577594	0.00337936	0.00318085	0.00320004	0.00591966	0.0112728	0.00488875	0.937519	0.00947363	0	0	0	0	0	0	0	0	0	0	1	0
A5D8V6;F5H4Q5	0.00843442	0.00369757	0.0251252	0.0184679	0.00843778	0.00107771	0.00214639	0.0204357	0.0249509	0.0057219	0.86964	0.0118641	0	0	0	0	0	0	0	0	0	0	1	0
A5PLL7;A5PLL7-2	0.0179272	0.005733	0.0078889	0.0101013	0.31642	0.00192255	0.426826	0.115382	0.0358565	0.0610131	0.000745314	0.000184523	0	0	0	0	0.368519	0	0.497102	0.134379	0	0	0	0
A5PLN9;A5PLN9-2;A5PLN9-4;A5PLN9-5	0.00102485	0.00284285	0.00729134	0.116772	0.00755755	0.00850582	0.00248804	0.00222626	0.00119319	0.00227559	0.169434	0.678389	0	0	0	0.121058	0	0	0	0	0	0	0.175653	0.703289
A5YKK6	0.0492023	0.00168448	0.0939647	0.113841	0.00959133	0.194279	0.0767366	0.0887609	0.0616908	0.0644811	0.0536453	0.192123	0	0	0.126185	0.152876	0	0.260897	0	0.119197	0.0828444	0	0	0.258001
A6NC48;Q10588	0.0633532	0.0349159	0.0518199	0.013041	0.00811482	0.044375	0.442585	0.192722	0.107942	0.0359792	0.00356747	0.00158435	0	0.0448695	0	0	0	0	0.568755	0.247662	0.138714	0	0	0
A6NCE7;H3BTL1;Q9GZQ8	0.00295117	0.00352398	0.0134735	0.245566	0.0135169	0.581861	0.0610273	0.0117053	0.0226293	0.00832613	0.00496944	0.0304495	0	0	0	0.296783	0	0.703217	0	0	0	0	0	0
A6NCW0;A8MUK1;C9J2P7;C9JJH3;C9JLJ4;C9JPN9;C9JVI0;D6R901;D6R9N7;D6RA61;D6RBQ6;D6RCP7;D6RJB6;Q0WX57;Q7RTZ2	0.00246621	0.00115876	0.0227436	0.529176	0.115818	0.053556	0.104771	0.106865	0.0246104	0.0232782	0.00480353	0.0107524	0	0	0	0.703823	0.154042	0	0	0.142135	0	0	0	0
A6NDG6	0.0054858	0.00406526	0.00572387	0.00600195	0.00307907	0.00399481	0.00335703	0.00610139	0.00656424	0.00380032	0.942857	0.00896901	0	0	0	0	0	0	0	0	0	0	1	0
A6NDU8	0.0302386	0.0139969	0.103865	0.103338	0.0345977	0.00381547	0.0350952	0.113372	0.122745	0.0130801	0.388453	0.037403	0	0	0.124872	0.124238	0	0	0	0.136302	0.14757	0	0.467018	0
A6NEM2;P51610;P51610-2;P51610-4	0.0349426	0.0178588	0.00874837	0.00223785	0.00419235	0.00466178	0.00145009	0.1147	0.746726	0.0102491	0.0471255	0.00710767	0	0	0	0	0	0	0	0.133152	0.866848	0	0	0
A6NF31;O75665;O75665-3	0.00585703	0.00227243	0.00200373	0.0105985	0.92341	0.000623304	0.0114248	0.0346478	0.00416719	0.00142683	0	0.00356841	0	0	0	0	1	0	0	0	0	0	0	0
A6NFX8;Q9UKK9	0.00536912	0.00360584	0.00588212	0.00632764	0.00416508	0.00557138	0.00297096	0.00596384	0.00642738	0.0043965	0.875932	0.0733884	0	0	0	0	0	0	0	0	0	0	1	0
A6NFY7	0.0221839	0.905158	0.0053362	0.00425594	0.00359311	0.00324856	0.00347566	0.0101657	0.0172177	0.00925479	0.00640481	0.00970563	0	1	0	0	0	0	0	0	0	0	0	0
A6NGJ0;P51808	0.00364128	0.00586305	0.00392765	0.00414154	0.00612072	0.00889387	0.00350847	0.0033212	0.00405753	0.00342642	0.00785919	0.945239	0	0	0	0	0	0	0	0	0	0	0	1
A6NGP5;Q9H910;Q9H910-3	0.00343302	0.00368908	0.00569334	0.00876913	0.00289667	0.00568119	0.00308832	0.0117552	0.0113857	0.00379777	0.92689	0.0129204	0	0	0	0	0	0	0	0	0	0	1	0
A6NGU5;B5MCK8;P19440	0.00373568	0.287107	0.0133838	0.0427688	0.434465	0.00074176	0.00209001	0.0487129	0.152319	0.00664972	0.00123146	0.00679536	0	0.328539	0	0	0.497162	0	0	0	0.1743	0	0	0
A6NHB5;A6NHN7;Q14202;Q14202-2	0.00664077	0.00715656	0.0614127	0.00399271	0.00718631	0.00811189	0.00757525	0.0173826	0.861231	0.00406428	0.00700826	0.00823725	0	0	0	0	0	0	0	0	1	0	0	0
A6NHG8;Q13114	0.00389464	0.00212938	0.00901248	0.00822113	0.0114674	0.365294	0.000705668	0.123435	0.0154587	0.0108193	0.0180246	0.431538	0	0	0	0	0	0.396943	0	0.134129	0	0	0	0.468927
A6NHJ8;A6NND8;O95825	0.000496068	0.00147965	0.0260155	0.144584	0.00984564	0.00917596	0.00236816	0.00325197	0.00128643	0.00116459	0.667463	0.132869	0	0	0	0.153013	0	0	0	0	0	0	0.706372	0.140615
A6NHL2;A6NHL2-2	0.0267665	0.00275405	0.00737799	0.00786384	0.348613	0.0130396	0.00799633	0.0321045	0.233759	0.0958844	0.00530796	0.218533	0	0	0	0	0.388735	0	0	0	0.260662	0.10692	0	0.243683
A6NHR9;A6NHR9-2	0.240998	0.0311107	0.00428721	0.0020256	0.0021084	0.00684504	0.00496208	0.0725083	0.557983	0.0667128	0.00696001	0.00349902	0.301632	0	0	0	0	0	0	0	0.698368	0	0	0
A6NI79	0.0774319	0.0958931	0.13303	8.8955e-05	0.0646417	3.16093e-05	0.216171	0.3166	0.0917091	0.00232505	0.000977833	0.00109951	0	0.104454	0.144905	0	0.0704123	0	0.235469	0.344864	0.099896	0	0	0
A6NIH7	0.00178938	0.00374563	0.00837694	0.00731691	0.00244311	0.00703144	0.00260817	0.00397988	0.0197188	0.00284971	0.910009	0.030131	0	0	0	0	0	0	0	0	0	0	1	0
A6NIT2;A6NMN0;P46020;P46020-2;P46020-3	0.00472708	0.0070993	0.0405319	0.00365579	0.00855618	0.00538576	0.00480937	0.00258146	0.00601362	0.00163044	0.0204769	0.894532	0	0	0	0	0	0	0	0	0	0	0	1
A6NIZ0;Q9GZM8;Q9GZM8-2;Q9GZM8-3	0.00341474	0.00188038	0.122213	0.138897	0.137605	0.0112752	0.0005267	0.0368411	0.0857781	0.00265743	0.298014	0.160897	0	0	0.129545	0.147229	0.14586	0	0	0	0.090924	0	0.315893	0.170549
A6NJ78	0.250559	0.622578	0.0277539	0.00197479	0.00365567	0.00362853	0.0096013	0.0208978	0.0338355	0.0133511	0.00617885	0.00598583	0.286964	0.713036	0	0	0	0	0	0	0	0	0	0
A6NJX0;Q9H4F1	0.0122531	0.00107779	0.00616993	0.028001	0.92472	0.000889271	0.0130055	0.0101266	0.000459736	7.13089e-05	0.000613347	0.00261297	0	0	0	0	1	0	0	0	0	0	0	0
A6NKD9;G3V4C8;H0YJE0;H0YJY5	0.00981948	0.00145535	0.00892585	0.0120543	0.0049669	0.000323501	0.00105364	0.00849434	0.0107619	0.00143514	0.935242	0.00546764	0	0	0	0	0	0	0	0	0	0	1	0
A6NL99;B7Z4U2;O14520	0.0308579	0.0746832	0.0226887	0.12167	0.0949125	0.00417101	0.366756	0.182108	0.0898485	0.00842245	0.00286013	0.00102186	0	0.0803064	0	0.130831	0.102059	0	0.394371	0.195819	0.0966136	0	0	0
A6NLH6;Q9P003	0.0135385	0.00450962	0.0121603	0.0225532	0.144506	0.0602972	0.625444	0.0968612	0.00290303	0.0129076	0.0028681	0.00145113	0	0	0	0	0.16671	0	0.721546	0.111744	0	0	0	0
A6NLN1;P26599;P26599-2;P26599-3	0.0078794	0.00175369	0.0257369	0.0545299	0.0120072	0.348106	0.325779	0.059749	0.0185496	0.1347	0.00559545	0.00561421	0	0	0	0	0	0.430512	0.4029	0	0	0.166588	0	0
A6NMH6;Q92599;Q92599-2;Q92599-4	0.0191589	0.00286035	0.16019	0.123066	0.00393908	0.0389443	0.013141	0.0571979	0.0171579	0.0106371	0.386766	0.166941	0	0	0.191395	0.147038	0	0	0	0	0	0	0.462106	0.199461
A6NMH8;E9PRJ8;H0YDJ9;H0YDL9;P60033	0.0848509	0.0184601	0.0932727	0.0542041	0.357555	0.00404426	0.0860366	0.194907	0.0672052	0.00398621	0.0342369	0.00124136	0	0	0.130828	0	0.501522	0	0	0.273385	0.094265	0	0	0
A6NML8;C9J6U3;O60879-2	0.00435195	0.00259625	0.0921694	0.0138235	0.00343225	0.00346021	0.0031276	0.0049744	0.0140853	0.00262711	0.755766	0.0995864	0	0	0.108699	0	0	0	0	0	0	0	0.891301	0
A6NMQ3;O43768;O43768-2;O43768-3;O43768-4;O43768-9;Q5T5H1	0.0040994	0.00444373	0.00372507	0.00768842	0.00256572	0.00304189	0.00303498	0.00560462	0.00704491	0.00390842	0.861094	0.0937492	0	0	0	0	0	0	0	0	0	0	1	0
A6NN50;O75147	0.0054873	0.00638428	0.054634	0.175967	0.00703197	0.149243	0.0102373	0.0113627	0.00277393	0.00385959	0.0601911	0.512828	0	0	0	0.209975	0	0.178086	0	0	0	0	0	0.611939
A6NNK5;Q12888;Q12888-2	0.167466	0.115308	0.0214624	0.00564698	0.00669641	0.00469808	0.00325815	0.0649494	0.484641	0.111403	0.0124504	0.00201952	0.190558	0.131208	0	0	0	0	0	0	0.551469	0.126765	0	0
A6NP52;O60831	0.0340918	0.00349752	0.0117431	0.0153746	0.039791	0.0179294	0.606182	0.0859132	0.0128716	0.167626	0.00225479	0.00272524	0	0	0	0	0	0	0.783375	0	0	0.216625	0	0
A6PVP4;B7ZBQ3;Q9H944;Q9H944-2	0.0126744	0.0314549	0.615243	0.003268	0.0107991	0.0018944	0.00755686	0.00910087	0.0961297	0.000827668	0.00674453	0.204307	0	0.0332106	0.649583	0	0	0	0	0	0.101495	0	0	0.215711
A6PW57;Q99755;Q99755-3	0.0939977	0.0235745	0.0480179	0.195052	0.0363088	0.0594265	0.0770641	0.154211	0.0729626	0.233411	0.001432	0.00454199	0	0	0	0.2975	0	0	0	0.235207	0.111285	0.356008	0	0
A6XND0;A6XND1;B3KWK7;P17936;P17936-2	0.129126	0.00388969	0.663718	0.0414827	0.0533437	0.00350303	0.0121461	0.0154251	0.0605236	0.00428983	0.00577043	0.0067822	0.142411	0	0.732006	0	0.0588321	0	0	0	0.0667507	0	0	0
A6ZKI3;Q9BWD3	0.0110945	0.00867205	0.0628919	0.0277318	0.00301181	0.011541	0.00437648	0.0183897	0.055246	0.00740184	0.676606	0.113037	0	0	0	0	0	0	0	0	0	0	1	0
A7E2V4;A7E2V4-3;A7E2V4-4;A7E2V4-5;S4R393;S4R410	0.00294252	0.00737602	0.00757339	0.00519336	0.00444325	0.00308183	0.000904242	0.00138139	0.0171954	0.00171041	0.354257	0.593941	0	0	0	0	0	0	0	0	0	0	0.373611	0.626389
A7MCY6	0.028602	0.00102234	0.00683137	0.00654781	0.459035	0.00587519	0.00494824	0.00913957	0.0111658	0.00306542	0.458606	0.00516124	0	0	0	0	0.500234	0	0	0	0	0	0.499766	0
A8CG34	0.0482203	0.145849	0.00701801	0.000954996	0.197714	0.00233388	0.0659366	0.0528627	0.429627	0.0273588	0.00383995	0.0182849	0	0.188633	0	0	0.255712	0	0	0	0.555655	0	0	0
A8DPD7;Q9C0D3	0.0476208	0.0208039	0.00847034	0.081305	0.0141304	0.0102334	0.00201554	0.00800526	0.173607	0.00898995	0.361185	0.263633	0	0	0	0.0924203	0	0	0	0	0.197341	0	0.410564	0.299675
A8K7Q2	NaN	NaN	NaN	NaN	NaN	NaN	NaN	NaN	NaN	NaN	NaN	NaN	NaN	NaN	NaN	NaN	NaN	NaN	NaN	NaN	NaN	NaN	NaN	NaN
A8KAH6;Q16082	0.00563399	0.0040986	0.00581785	0.00648856	0.00301511	0.00351834	0.00308969	0.00576177	0.00729608	0.00293325	0.942678	0.00966908	0	0	0	0	0	0	0	0	0	0	1	0
A8MPU2;C9JBU8;O14713	0.0219868	0.011274	0.0352487	0.041242	0.00326417	0.123519	0.00206144	0.0767354	0.0842037	0.00466015	0.303055	0.29275	0	0	0	0	0	0.153721	0	0	0.104793	0	0.377155	0.364331
A8MQB8;G3V0J0;Q06787-2	0.0251647	0.00171424	0.0474281	0.00185514	0.0138419	0.0299491	0.225908	0.0164442	0.347934	0.285107	0.0021666	0.00248762	0	0	0	0	0	0	0.263005	0	0.405069	0.331925	0	0
A8MSI8;D6RAR2;D6RFL2;J3KTA2	0.0629071	0.67004	0.00335631	0.00176524	0.0309564	0.00205584	0.00156794	0.0169963	0.0432706	0.152795	0.00709814	0.00719065	0	0.814307	0	0	0	0	0	0	0	0.185693	0	0
A8MSY1;Q86TL2	0.00177377	0.00130658	0.015144	0.274702	0.520939	0.0229027	0.118604	0.00450806	0	0	0.00321144	0.0369082	0	0	0	0.345259	0.654741	0	0	0	0	0	0	0
A8MTT3	0.0894885	0.151245	0.628715	0.00288913	0.00659609	0.00190393	0.00310971	0.00679466	0.0963362	0.000586064	0.00718486	0.00515066	0	0.172596	0.717469	0	0	0	0	0	0.109936	0	0	0
A8MU27;A8MUA9;P55854;P55854-2	0.0115381	0.00533458	0.00531883	0.00601366	0.00462919	0.002916	0.00221654	0.01422	0.059541	0.00862056	0.874695	0.004957	0	0	0	0	0	0	0	0	0.0637323	0	0.936268	0
A8MUM1;Q53HC9	0.000868896	0.00106297	0.0159688	0.0842654	0.00443642	0.103066	0.00313922	0.00225384	0.00200605	0.00464436	0.433448	0.34484	0	0	0	0.0872657	0	0.106736	0	0	0	0	0.448881	0.357118
A8MVV6;E9PN41;J3KQ42;O14817	0.115688	0.128852	0.246062	0.000510399	0.402205	0.000700066	0.0400051	0.0530502	0.00711142	0.000680072	0.00237382	0.00276163	0.129577	0.144323	0.275604	0	0.450495	0	0	0	0	0	0	0
A8MVW0	0.0176628	0.294359	0.0173105	0.139111	0.0849347	0.0162363	0.0115922	0.285524	0.107017	0.00554864	0.00125009	0.0194545	0	0.323136	0	0.15271	0.093238	0	0	0.313437	0.11748	0	0	0
A8MWY0	0.00054011	0.00126465	0.00332581	0.463845	0.28669	0.0190897	0.217122	0.00261778	0.000181433	0.000876416	0.00369053	0.000757114	0	0	0	0.479349	0.296272	0	0.224379	0	0	0	0	0
A8MXB7;Q9Y343	0.00266511	0.000434703	0.071492	0.151253	0.0109072	0.0397129	0.00213798	0.0021727	0.00957231	0.00180099	0.357439	0.350413	0	0	0.0768238	0.162533	0	0	0	0	0	0	0.384097	0.376546
A8MXP9	0.0738477	0.0163991	0.0133572	0.00199212	0.00237378	0.0074694	0.00435901	0.0826113	0.753893	0.032512	0.00686379	0.00432146	0	0	0	0	0	0	0	0	1	0	0	0
A8MXV4	0.0948914	0.819867	0.00624078	0.0042457	0.00259701	0.00348512	0.00503729	0.0256945	0.00539751	0.0184979	0.00614997	0.00789536	0	1	0	0	0	0	0	0	0	0	0	0
A9X3U0;Q96GF1	0.111328	0.0894808	0.0838559	0.0056582	0.111763	0.0845647	0.346353	0.108566	0.000426694	0.0557823	0.00139997	0.00082206	0.118951	0.0956083	0.0895982	0	0.119416	0.0903555	0.37007	0.116001	0	0	0	0
A9Z1X7;E9PCT1;Q8IYB3;Q8IYB3-2	0.00893646	0.011542	0.330252	0.0395988	0.00467081	0.00585534	0.00351485	0.029754	0.477334	0.0102955	0.0653532	0.0128935	0	0	0.408937	0	0	0	0	0	0.591063	0	0	0
B0QY89;Q9Y262	0.00286512	0.00463948	0.006467	0.181021	0.0305466	0.635895	0.0110432	0.0068582	0.00810291	0.011992	0.0288677	0.0717017	0	0	0	0.22159	0	0.77841	0	0	0	0	0	0
B0QY95;Q9NQG6	0.173506	0.204208	0.0745919	0.0491179	0.00366297	0.0617027	0.0981709	0.146197	0.0349245	0.0799551	0.0431237	0.0308393	0.255736	0.300989	0.109943	0	0	0	0	0.215484	0	0.117848	0	0
B0QYK0;Q01844;Q01844-3;Q01844-5;Q01844-6	0.010639	0.00181004	0.0662825	0.0998001	0.00175397	0.115225	0.00807906	0.0917316	0.0436485	0.0283259	0.460487	0.0722168	0	0	0	0.130076	0	0.150181	0	0.11956	0	0	0.600183	0
B0QYN7;H3BQQ9;P63279	0.00473314	0.00419032	0.00834311	0.0068183	0.00286157	0.00623942	0.00211096	0.00636693	0.0693153	0.00517359	0.870098	0.013749	0	0	0	0	0	0	0	0	0.0737857	0	0.926214	0
B0QYS6;B0QYS7;P19484	0.00374635	0.00355688	0.00715704	0.00907755	0.00529286	0.00367838	0.00178799	0.00417851	0.0136975	0.00303608	0.684255	0.260536	0	0	0	0	0	0	0	0	0	0	0.72424	0.27576
B0QZ40;Q7Z4G1;Q7Z4G1-2	NaN	NaN	NaN	NaN	NaN	NaN	NaN	NaN	NaN	NaN	NaN	NaN	NaN	NaN	NaN	NaN	NaN	NaN	NaN	NaN	NaN	NaN	NaN	NaN
B0YJ81	0.0420083	0.00107595	0.00975948	0.0156873	0.200476	0.0114539	0.649304	0.0211512	8.86978e-06	0.0473626	0.00156458	0.000147338	0	0	0	0	0.235915	0	0.764085	0	0	0	0	0
B1AHL2	0.00265489	0.00701768	0.836741	0.00319223	0.0068519	0.00253857	0.00414628	0.00339791	0.12208	0	0.00643444	0.00494501	0	0	0.872677	0	0	0	0	0	0.127323	0	0	0
B1AK88;P47756-2	0	0.0046855	0.00343205	0.38504	0.0110627	0.0208053	0.00159883	0.00740431	0.0212035	0.00678595	0.0736539	0.464327	0	0	0	0.453326	0	0	0	0	0	0	0	0.546674
B1AKL4;Q9NRA8;Q9NRA8-3	0.0422985	0.105659	0.168434	0.098112	0.0222345	0.28325	0.0670653	0.108573	0.0302691	0.00114343	0.0105924	0.0623681	0	0.138292	0.220455	0.128414	0	0.370733	0	0.142107	0	0	0	0
B1AKR6;Q9NP97	0.00386445	0.00525449	0.00385756	0.00643965	0.00650961	0.00327899	0.00411901	0.00395662	0.00508741	0.0027483	0.0219961	0.932888	0	0	0	0	0	0	0	0	0	0	0	1
B1AKY9;P50993	0.256754	0.150246	0.0673649	0.0164085	0.0188207	0.00383243	0.256522	0.137049	0.059717	0.0200434	0.00236144	0.0108795	0.298451	0.174646	0	0	0	0	0.298182	0.159306	0.069415	0	0	0
B1AL05;H0Y6Y8;Q8N983;Q8N983-2;Q8N983-3;Q8N983-4;Q8N983-6;Q8N983-7	0.0779938	0.806442	0.0086251	0.00366184	0.0021308	0.00399426	0.0051828	0.00853843	0.06258	0.00566729	0.00642449	0.0087597	0	0.927988	0	0	0	0	0	0	0.072012	0	0	0
B1AL69;Q7L3B6	0.00508629	0.00355977	0.0575939	0.0612284	0.0635483	0.00355574	0.00308642	0.0168808	0.00912344	0.00311263	0.685408	0.087816	0	0	0	0	0.0848491	0	0	0	0	0	0.915151	0
B1ALD0;Q9Y6B7	0.00207941	0.00297412	0.0130059	0.0822166	0.00569437	0.0125982	0.00129348	0.00260565	0.00457098	0.00170527	0.283339	0.587917	0	0	0	0.0862286	0	0	0	0	0	0	0.297166	0.616606
B1ALM5;Q9P0T7	0.000524711	0.000387228	0.00417156	0.602443	0.106111	0.10113	0.173912	0.00377748	0.000617878	0.000892808	0.00385419	0.00217916	0	0	0	0.744047	0.131052	0.124901	0	0	0	0	0	0
B1ALY0;Q8IXS6-2	0.0138783	0.00916571	0.0671815	0.0234236	0.00550973	0.00306213	0.00325359	0.0807076	0.0910657	0.0101237	0.66523	0.0273985	0	0	0	0	0	0	0	0	0.12041	0	0.87959	0
B1AMS2;Q14141;Q14141-2;Q14141-4	0	8.96035e-05	0.105989	0.339129	0.169262	0.017255	0.00944533	0.15313	0.0171413	0.114475	0.00753987	0.0665434	0	0	0.120171	0.384507	0.19191	0	0	0.17362	0	0.129792	0	0
B1AMU3;B1AMU4;Q9Y3B2;R4GMQ7;R4GNH9	0.0129521	0.00981274	0.0339725	0.0121241	0.00348958	0.0517022	0.00271444	0.104946	0.592447	0.0161838	0.148278	0.0113772	0	0	0	0	0	0	0	0.124098	0.700564	0	0.175338	0
B1AMW1;P19256;P19256-2;P19256-3	0.0112191	0.0219672	0.014119	0.030171	0.228119	0.00477323	0.320787	0.222977	0.135736	0.00780786	0.0020124	0.000310441	0	0	0	0	0.251338	0	0.353438	0.245673	0.149552	0	0	0
B1ANH0;B1ANH2;Q16774;Q16774-2	0.153569	0.152925	0.0591607	0.0224547	0.000493636	0.00527714	0.00309264	0.081213	0.10996	0.0151952	0.322469	0.0741907	0.207828	0.206956	0	0	0	0	0	0	0.148811	0	0.436405	0
B1AP13;H3BLV0;H7BY55;P08174;P08174-2;P08174-3;P08174-4;P08174-5;P08174-6;P08174-7	0.0474663	0.00862185	0.635556	0.00362896	0.00724668	0.00250186	0.0416018	0.08709	0.132659	0.023578	0.00536348	0.00468593	0	0	0.827315	0	0	0	0	0	0.172685	0	0	0
B1AP22;P49810;P49810-3	0.00642838	0.00249591	0.00793033	0.0612037	0.210429	0.0162397	0.57821	0.102062	0.00130699	0.011411	0.00151133	0.000771901	0	0	0	0	0.236251	0	0.649163	0.114586	0	0	0	0
B1APR7;Q99504;Q99504-2;Q99504-4;Q99504-5	0.000874067	0.00348491	0.0099168	0.299867	0.0324503	0.015749	0.000941186	0.000807011	0.256486	0	0.0782768	0.301147	0	0	0	0.349699	0	0	0	0	0.29911	0	0	0.351191
B1AVT0;P49760;P49760-3	0.02142	0.0217324	0.483926	0.00568378	0.00835763	0.0180851	0.00439963	0.00807277	0.213882	0.205546	0.00447857	0.00441676	0	0	0.535699	0	0	0	0	0	0.236764	0.227536	0	0
B2R5W2;B4DY08;G3V4W0;P07910-2	0.0478202	0.0389327	0.0195458	0.00174281	0.00348135	0.00589687	0.00386024	0.0594843	0.757235	0.0149871	0.00931662	0.0376965	0	0.0489001	0	0	0	0	0	0	0.9511	0	0	0
B2RNG4;Q9BYJ4;Q9BYJ4-2	0.0302059	0.157021	0.0068093	0.00249255	0.234932	0.101046	0.00621881	0.164953	0.270854	0.00319495	0.00673808	0.0155356	0	0.169057	0	0	0.25294	0.108792	0	0.177597	0.291615	0	0	0
B2RTY4;B2RTY4-2;B2RTY4-4	0.00179841	0.00586523	0.00383652	0.0046496	0.00781932	0.00559078	0.00375731	0.00226992	0.0193571	0.00267742	0.0263575	0.916021	0	0	0	0	0	0	0	0	0	0	0	1
B2WTI3;B2WTI4;K7EJU9;Q6NYC1;Q6NYC1-2;Q6NYC1-3	0.00793881	0.0712003	0.31556	0.0702161	0.0799342	0.0241501	0.000951779	0.00812361	0.0336852	0.00248177	0.0772302	0.308528	0	0.091845	0.407057	0	0.103111	0	0	0	0	0	0	0.397986
B3KT51;E7EPS7;H0YNF6;H0YNS4;Q9BRN9;Q9BRN9-2	0.0655813	0.39269	0.0185119	0.00739754	0.0268477	0.002296	0.10256	0.219346	0.0607301	0.0891465	0.00202108	0.0128718	0	0.5154	0	0	0	0	0	0.287889	0.0797075	0.117004	0	0
B3KTM8;Q9UBU8-2	0.00113062	0.00468026	0.0845858	0.0105255	0.00139514	0.20163	0.000886256	0.00220035	0.332772	0.00520095	0.313359	0.0416348	0	0	0.0907236	0	0	0.21626	0	0	0.356919	0	0.336097	0
B3KUS5;Q70CQ3	0.0686602	0.855931	0.00756743	0.00362989	0.00336454	0.00349762	0.00637369	0.0129204	0.0080452	0.0165962	0.00520384	0.00821029	0	1	0	0	0	0	0	0	0	0	0	0
B3KW70;F5GYX4;H0YG03;Q13361;Q13361-2	0.175269	0.163351	0.379442	0.00126893	0.00243476	0.00174671	0.00556824	0.0803353	0.175463	0.0102746	0.00211185	0.00273411	0.196155	0.182816	0.424657	0	0	0	0	0	0.196372	0	0	0
B3KY94;O14735;O14735-3	0.0816659	0.0152423	0.0140996	0.00596553	0.022577	0.0058785	0.617075	0.0781001	0.00363119	0.151571	0.00206897	0.0021253	0	0	0	0	0	0	0.802808	0	0	0.197192	0	0
B4DDD6	0.00630915	0.00409793	0.00650288	0.00527073	0.00321682	0.00303507	0.00316705	0.00644868	0.00753334	0.00490912	0.94087	0.00863943	0	0	0	0	0	0	0	0	0	0	1	0
B4DDF4;B4DUT8;Q99439	0.00702595	0.0309785	0.0193524	0.00484246	0.00393361	0.00339849	0.00326771	0.0198332	0.00995677	0.00289021	0.882179	0.0123421	0	0	0	0	0	0	0	0	0	0	1	0
B4DEE8;P16455	0.00535568	0.0036294	0.0093614	0.0147468	0.00887513	0.00238641	0.00236531	0.00583444	0.0253045	0.00502038	0.841314	0.0758063	0	0	0	0	0	0	0	0	0	0	1	0
B4DFC0;E9PMV6;E9PR50;G3V1B4;Q9UGK8;Q9UGK8-2	0.00395985	0.00509516	0.00272622	0.00640525	0.00374614	0.00456655	0.00263405	0.00376857	0.0052038	0.0035093	0.796426	0.161959	0	0	0	0	0	0	0	0	0	0	0.831008	0.168992
B4DGI9;Q99081;Q99081-3	0.00517214	0.118848	0.00884948	0.00937199	0.00428372	0.00281831	0.0025975	0.0291514	0.737	0.0143958	0.0511424	0.0163687	0	0.138866	0	0	0	0	0	0	0.861134	0	0	0
B4DJV2;O75390	0.101161	0.824313	0.00474317	0.00348421	0.00244371	0.00319832	0.00909998	0.0133544	0.00537304	0.0201887	0.00549211	0.00714837	0	1	0	0	0	0	0	0	0	0	0	0
B4DJV5;Q13610	0.0245212	0.00809491	0.0129743	0.0192175	0.189603	0.202758	0.0144557	0.0590928	0.199971	0.0173934	0.13842	0.113498	0	0	0	0	0.259462	0.277465	0	0	0.273651	0	0.189422	0
B4DK77;Q9H6K4	0.059036	0.608821	0.00463056	0.00558718	0.00644093	0.00305964	0.0231151	0.0153261	0.0383916	0.222817	0.00314095	0.00963436	0	0.732075	0	0	0	0	0	0	0	0.267925	0	0
B4DL54	0.00303847	0.00473973	0.00413243	0.00574259	0.00336731	0.00605814	0.00297153	0.00405442	0.0177472	0.00392717	0.890136	0.0540847	0	0	0	0	0	0	0	0	0	0	1	0
B4DLP0;B8ZZF7;O00338;O00338-2	0.00399575	0.00825778	0.67832	0.00416991	0.00864958	0.00406824	0.00614211	0.00610496	0.264745	0.000441882	0.00865505	0.00645063	0	0	0.719272	0	0	0	0	0	0.280728	0	0	0
B4DP62	0.0617387	0.874226	0.00582231	0.00409721	0.00268603	0.00355919	0.00640323	0.00751293	0.00517527	0.01507	0.00546556	0.00824309	0	1	0	0	0	0	0	0	0	0	0	0
B4DR61;P61619	0.16197	0.0230772	0.0277053	0.0110246	0.0154594	0.0104404	0.588571	0.0764819	0.00411045	0.074383	0.00394543	0.00283088	0.196345	0	0	0	0	0	0.713485	0	0	0.0901694	0	0
B4DR80;Q9Y6E0;Q9Y6E0-2	0.00212904	0.00264486	0.319119	0.0378835	0.00277015	0.00729138	0.0057976	0.0046314	0.0102946	0.00261415	0.475263	0.129561	0	0	0.345388	0	0	0	0	0	0	0	0.514386	0.140226
B4DRN8;Q5W0Z9;Q5W0Z9-3;Q5W0Z9-4	0	0	0.00474925	0.241739	0.510683	0.00271448	0.00053575	0.00411307	0.223843	0	0	0.0116223	0	0	0	0.247616	0.523098	0	0	0	0.229285	0	0	0
B4DUA7;Q9NX70	0.013612	0.0433448	0.273415	0.0364192	0.00339634	0.27464	0.00161292	0.0112669	0.32119	0.00569437	0.010736	0.00467292	0	0.0474966	0.299604	0	0	0.300946	0	0	0.351954	0	0	0
B4DUC8;Q13126	0.004594	0.00427133	0.00549603	0.00584337	0.00335167	0.00466103	0.00330466	0.00475945	0.00535852	0.00316282	0.917222	0.0379754	0	0	0	0	0	0	0	0	0	0	1	0
B4DUD2;C9IYT2;C9IZ27;C9JEN3;C9JW19;C9JWV9;F8WDY4;Q969X1	NaN	NaN	NaN	NaN	NaN	NaN	NaN	NaN	NaN	NaN	NaN	NaN	NaN	NaN	NaN	NaN	NaN	NaN	NaN	NaN	NaN	NaN	NaN	NaN
B4DVN3;E7ESC7;Q7L5Y9;Q7L5Y9-3	0.00703398	0.00678282	0.0929882	0.113833	0.0101921	0.0326553	0.00499166	0.00573608	0.0186099	0.011194	0.0189136	0.67707	0	0	0.105203	0.128786	0	0	0	0	0	0	0	0.766011
B4DWG0;O95199;O95199-2	0.00479235	0.00829259	0.574833	0.00435678	0.00722751	0.00145911	0.00791646	0.00357076	0.076831	0.00116779	0.00847147	0.301081	0	0	0.603344	0	0	0	0	0	0.0806417	0	0	0.316014
B4DWH1;Q9Y6I8;Q9Y6I8-2	0.0496298	0.496779	0.037868	0.00555423	0.247458	0.00325468	0.0105288	0.0820903	0.0207708	0.0348152	0.00361529	0.00763623	0	0.667502	0	0	0.332498	0	0	0	0	0	0	0
B4DXZ6;P51114	0.00991167	0.00127598	0.0148604	0.0132592	0.0096702	0.127636	0.399829	0.0494788	0.070078	0.299102	0.00287228	0.00202763	0	0	0	0	0	0.142348	0.445917	0	0.0781559	0.333579	0	0
B4DYU2;Q96MW5	0.00505165	0.0112302	0.0269319	0.00930339	0.00386537	0.00190984	0.00179291	0.00140567	0.00999396	0.00317699	0.127837	0.797501	0	0	0	0	0	0	0	0	0	0	0	1
B4DYW4;E9PPH4;Q86VG3	0.00681819	0.00509692	0.0105775	0.0102159	0.00473087	0.00206099	0.00252293	0.0214576	0.00989797	0.002866	0.917929	0.00582571	0	0	0	0	0	0	0	0	0	0	1	0
B4E0E3;G3V1M5;Q9H6X4;Q9H6X4-2;Q9H6X4-3	0.0468217	5.74941e-05	0.00661313	0.577409	0.313661	0.00793218	0.00829175	0.0299014	0.000808521	0.00102335	0.00588828	0.00159203	0	0	0	0.647995	0.352005	0	0	0	0	0	0	0
B4E0K5;Q16539	0.00493935	0.00496302	0.0032523	0.00486536	0.00297649	0.00375643	0.00271839	0.00472054	0.0206274	0.0052307	0.904213	0.037737	0	0	0	0	0	0	0	0	0	0	1	0
B4E0T2;P50542;P50542-3;P50542-4	0.0551776	0.0133924	0.0463469	0.123903	0.00751352	0.0451935	0.00405352	0.0227139	0.0983757	0.00326241	0.476525	0.103542	0	0	0	0.177308	0	0	0	0	0.140777	0	0.681915	0
B4E0Y9;Q8NBY1;Q9P289	0.00435545	0.00358148	0.00486678	0.00607305	0.00401483	0.00547615	0.00282713	0.00413678	0.00368367	0.00220086	0.852833	0.105951	0	0	0	0	0	0	0	0	0	0	1	0
B4E107;F5GXE4;O95260-2	0.00144144	0.00294018	0.0167238	0.0109894	0.00593572	0.0211737	0.00170996	0.00405231	0.0572404	0.0104282	0.75468	0.112685	0	0	0	0	0	0	0	0	0.0705	0	0.9295	0
B4E1G1;E5RGY0;Q9BUN8;Q9BUN8-2	0.0861743	0.00488016	0.127268	0.0149019	0.0593554	0.0126738	0.355131	0.216537	0.041731	0.0786686	0.000883535	0.00179575	0	0	0.15206	0	0.0709179	0	0.424311	0.258718	0	0.0939933	0	0
B4E1N1;Q6NXE6;Q6NXE6-2	0.00446319	0.00429227	0.00729275	0.005696	0.00246936	0.00331986	0.00326961	0.0042862	0.0113075	0.00247037	0.922969	0.0281642	0	0	0	0	0	0	0	0	0	0	1	0
B4E1Q4;O14730	0.000904902	0.00614394	0.0054347	0.010506	0.00691014	0.327682	0.00154114	0	0.00279171	0.00407587	0.0323009	0.601709	0	0	0	0	0	0.352577	0	0	0	0	0	0.647423
B4E2Q0;P98194;P98194-4	0.000611456	0.00125941	0.0253535	0.261027	0.319103	0.0926472	0.242732	0.052311	6.26307e-05	0	0.00266301	0.00222945	0	0	0	0.285117	0.348552	0.101197	0.265133	0	0	0	0	0
B4E3L3;G3V1N5;Q96RU2;Q96RU2-2	0.0914107	0.0319587	0.0310543	0.00299072	0.0116652	0.00723043	0.00190517	0.0134573	0.41655	0.235039	0.00942032	0.147318	0	0.0384643	0	0	0	0	0	0	0.501345	0.282884	0	0.177307
B4E3T4;Q93062;Q93062-2;Q93062-3;Q93062-4;Q93062-5	0.0080752	0.00264043	0.0386649	0.0304418	0.0262551	0.00677717	0.010301	0.142083	0.25279	0.0468335	0.42753	0.00760815	0	0	0	0	0	0	0	0.172766	0.307379	0	0.519855	0
B5MBX2;F8WE86;P20062	0.00257182	0.00199472	0.0597968	0.317214	0.107321	0.089	0.241325	0.131367	0.0164259	0.0113591	0.00486751	0.0167575	0	0	0	0.357938	0.121099	0.100426	0.272306	0.148232	0	0	0	0
B5MBZ0;Q9HC35	0.00188803	0.00354437	0.0194831	0.183969	0.00159055	0.659453	0.00836296	0.00502291	0.00812901	0.00642688	0.0679972	0.0341337	0	0	0	0.218122	0	0.781878	0	0	0	0	0	0
B5MC02;C9JLP2;Q8NFT2;Q8NFT2-2;Q8NFT2-3	0.000678828	0.00334314	0.0628981	0.269152	0.479512	0.00144346	0.0223208	0.159248	0	0	0.00140404	0	0	0	0	0.296452	0.528148	0	0	0.1754	0	0	0	0
B5MC20;P0C870	0.00547152	0.00960202	0.0126074	0.0101148	0.0059902	0.00349957	0.00660925	0.0059608	0.00761582	0.00608512	0.70243	0.224013	0	0	0	0	0	0	0	0	0	0	0.758201	0.241799
B5MC22;Q9UDX5	0.106433	0.812257	0.0135827	0.00432663	0.00749314	0.0027041	0.00120181	0.0212961	0.0117598	0.00428989	0.00436746	0.0102882	0.115853	0.884147	0	0	0	0	0	0	0	0	0	0
B5MC53;B5MCF8;G5E9F5;P39210	0.125697	0.79962	0.0105711	0.0048576	0.0048439	0.00318524	0.00279099	0.0168486	0.005981	0.0116453	0.00447311	0.00948625	0.135842	0.864158	0	0	0	0	0	0	0	0	0	0
B5MCD7;O43759;O43759-2	0.0111865	0.0665765	0.0259704	0.258738	0.0914021	0.162697	0.00085212	0.0316708	0.109443	0.0173263	0.00624695	0.21789	0	0.0734234	0	0.285347	0.100802	0.17943	0	0	0.120699	0	0	0.240299
B5MCF4;C9JDC5;P05230;P05230-2	0.00651663	0.00559363	0.0122503	0.00824422	0.00444849	0.00199534	0.00324	0.0303272	0.0515128	0.00795423	0.853151	0.0147664	0	0	0	0	0	0	0	0	0	0	1	0
B5MCF9;O00541	0.0566943	0.0100508	0.0750775	0.00223472	0.00559579	0.0109444	0.0113323	0.0809816	0.676473	0.0604876	0.0054898	0.00463846	0	0	0.0998969	0	0	0	0	0	0.900103	0	0	0
B5MCN7;Q15788;Q15788-2;Q15788-3	0.00170257	0.00409693	0.7873	0.00182234	0.0125254	0.00118282	0.00307302	0.018003	0.0764024	0.000120234	0.0859848	0.00778694	0	0	0.911541	0	0	0	0	0	0.0884592	0	0	0
B5MCR8;Q6NXT4;Q6NXT4-2;Q6NXT4-4	0.00110395	0.00209436	0.0125954	0.0201733	0.927757	0.00394787	0.00537966	0.0269489	0	0	0	0	0	0	0	0	1	0	0	0	0	0	0	0
B5MCX7;D3YTC9;F8WB76;H7C3L3;Q6NXT1;Q6NXT1-2	0.00919687	0.00427266	0.0148321	0.00784281	0.00528479	0.00174744	0.00266962	0.0125701	0.038786	0.0063707	0.888915	0.00751168	0	0	0	0	0	0	0	0	0	0	1	0
B5MD46;F8WCD1;Q9BXI6;Q9BXI6-2	0.0178369	0.0115796	0.0508113	0.0360177	0.00485487	0.00192909	0.00426065	0.0484331	0.122478	0.0150818	0.44249	0.244227	0	0	0	0	0	0	0	0	0.151358	0	0.546827	0.301815
B5MDF5;J3KQE5;P62826	0.00638467	0.00426245	0.0102916	0.00581987	0.0039869	0.00411322	0.0031379	0.00904549	0.0124636	0.00410509	0.920968	0.0154209	0	0	0	0	0	0	0	0	0	0	1	0
B5MDL5;P53778;P53778-2	0.00418267	0.00464018	0.00347844	0.00550569	0.00322224	0.00538457	0.00241993	0.0216085	0.342921	0.00584177	0.588875	0.0119203	0	0	0	0	0	0	0	0	0.368022	0	0.631978	0
B5MDU6;Q9H6V9;Q9H6V9-2	0.019156	0.00193139	0.343289	0.0855902	0.0800687	0.061644	0.213276	0.150448	0.0250587	0.00952157	0.00299192	0.00702411	0	0	0.393377	0.0980783	0.0917512	0	0.244394	0.1724	0	0	0	0
B5ME97;E7EW69;E7EX04;Q9P0V9;Q9P0V9-2;Q9P0V9-3	0.0433735	0.205982	0.322782	0.049346	0.00775484	0.0661531	0.0588974	0.124208	0.0305241	0.0121163	0.0555709	0.023292	0	0.315453	0.494328	0	0	0	0	0.190219	0	0	0	0
B7WP74;Q9HCG8	0.0111538	0.00920806	0.0172299	0.0303889	0.127436	0.2026	0.00335811	0.00810968	0.54547	0.0173678	0.00772171	0.0199556	0	0	0	0	0.145556	0.231409	0	0	0.623034	0	0	0
B7WPE2;Q32P44	0.00354605	0.00488044	0.011337	0.0733762	0.0042329	0.45276	0.00554025	0.00113539	0.00922543	0.00786334	0.0250445	0.401059	0	0	0	0	0	0.530277	0	0	0	0	0	0.469723
B7WPG3;C9IYN3;Q8WVV9;Q8WVV9-4;Q8WVV9-5;V9GYK2	0.001734	0.000772583	0.0810776	0.314091	0.014641	0.419723	0.0635	0.0594676	0.00638852	0.00515739	0.0212641	0.0121838	0	0	0.099495	0.385439	0	0.515066	0	0	0	0	0	0
B7WPJ3;Q8WTX7	0.00652372	0.00613211	0.00551076	0.0445	0.00617121	0.00913048	0.00169617	0.0139992	0.178398	0.0342341	0.558303	0.135401	0	0	0	0	0	0	0	0	0.204561	0	0.640181	0.155258
B7WPL9;Q6PFW1;Q6PFW1-2;Q6PFW1-3;Q6PFW1-7	0.00336747	0.00512007	0.0293199	0.00301633	0.00421051	0.0349294	0.00201394	0.00279016	0.0519651	0.00299046	0.750635	0.109642	0	0	0	0	0	0	0	0	0	0	1	0
B7Z2R7;Q5T8D3;Q5T8D3-2;Q5T8D3-3;Q5T8D3-4	0.346417	0.539475	0.00863719	0.00213313	0.00414947	0.0024119	0.0225104	0.0430504	0.00815917	0.0140436	0.00411305	0.00489982	0.391037	0.608963	0	0	0	0	0	0	0	0	0	0
B7Z493;E9PJX4;F8VWL3;Q96M96	0.00823956	0.196959	0.0190444	0.487344	0.0119112	0.15649	9.31317e-05	0.00727488	0.00408604	0.0160094	0.0695074	0.0230397	0	0.234254	0	0.579624	0	0.186122	0	0	0	0	0	0
B7Z4C8;B7Z4E3;C9JU56;H7C2W9;P62899;P62899-2;P62899-3	0.00335858	0.00430222	0.00650529	0.030117	0.00702061	0.851755	0.0343857	0.00528539	0.0165071	0.0103043	0.00549798	0.0249613	0	0	0	0	0	1	0	0	0	0	0	0
B7Z4L1;B7Z4U3;E7EPD9;E7EPW5;E9PCV1;G3XAH9;H7BXS2;Q9NRC1-2;Q9NRC1-3;Q9NRC1-4;Q9NRC1-5;Q9NRC1-6	0.0460243	0.0228812	0.00723885	0.00341712	0.224877	0.00273276	0.329123	0.0181031	0.0565393	0.283181	0.00356924	0.00231287	0	0	0	0	0.251619	0	0.368261	0	0.0632629	0.316857	0	0
B7Z6D5;Q96GQ7	0.0888964	0.0177313	0.00637051	0.0026222	0.00379879	0.00626038	0.00357332	0.107512	0.738232	0.0147541	0.0044569	0.00579175	0	0	0	0	0	0	0	0.127121	0.872879	0	0	0
B7Z6Q0;Q12980	0.00331111	0.00899758	0.046136	0.203572	0.0645298	0.456395	0.00318746	0.00428891	0.0115008	0.00327883	0.00435507	0.190447	0	0	0	0.222497	0.0705287	0.498823	0	0	0	0	0	0.208152
B7Z6T3;E9PCX5;Q8NDZ6	0.0333664	0.102229	0.0176789	0.00172331	0.23692	0.00242321	0.000762949	0.105317	0.273548	0.216913	0	0.00911814	0	0.109344	0	0	0.25341	0	0	0.112648	0.292587	0.232011	0	0
B7Z7P8;P62495;P62495-2	0.00347639	0.00126864	0.093416	0.234663	0.00351446	0.226366	0.0147675	0.0311712	0.00745086	0.00401066	0.319864	0.0600314	0	0	0.106845	0.268398	0	0.258908	0	0	0	0	0.365848	0
B7Z9I1;P11310;P11310-2;Q5T4U5	0.033027	0.902997	0.00561738	0.00400529	0.00253214	0.00335054	0.00486973	0.00882617	0.00827814	0.0111195	0.00671176	0.00866516	0	1	0	0	0	0	0	0	0	0	0	0
B7ZAQ6;B7ZAQ6-2;B7ZAQ6-3;P0CG08	0.0511078	0.00584399	0.0141836	0.227562	0.36961	0.0739716	0.170009	0.0282602	0.0170708	0.0364473	0.00287468	0.003059	0	0	0	0.339066	0.550716	0.110217	0	0	0	0	0	0
B7ZBD4;E7EWW3;F2Z2T3;F2Z3J7;Q9UBK7;Q9UBK7-2;Q9UBK7-3;Q9UNT1;Q9UNT1-2;Q9UNT1-3	0.00428773	0.00455518	0.00587741	0.0135976	0.00232888	0.00468974	0.00316303	0.00577484	0.0200534	0.00544702	0.904181	0.0260437	0	0	0	0	0	0	0	0	0	0	1	0
B7ZBK1;P00742;Q5JVE8	0.0956844	0.00358726	0.0208264	0.0036273	0.00434328	0.00445638	0.00456771	0.0763214	0.6763	0.0118278	0.0778497	0.0206081	0	0	0	0	0	0	0	0	1	0	0	0
B7ZC38;Q9NR46	0.00980911	0.0243812	0.00840709	0.00525257	0.00285594	0.00353009	0.00251241	0.00620812	0.0297178	0.0042684	0.736339	0.166719	0	0	0	0	0	0	0	0	0	0	0.815384	0.184616
B7ZKJ3;B7ZKW7;P54756;P54756-2;P54756-3	0.038106	0.0846734	0.00707025	0.00442332	0.244861	0	0.00299542	0.0171139	0.0780337	0.00570372	0.207494	0.309526	0	0.0915797	0	0	0.264833	0	0	0	0.0843984	0	0.224417	0.334772
B7ZKJ8;Q14624;Q14624-2;Q14624-3	0.0509721	0.182411	0.03635	0.00190874	0.0110916	0.003825	0.00173373	0.020274	0.677113	0.0021991	0.0031938	0.00892814	0	0.212224	0	0	0	0	0	0	0.787776	0	0	0
B7ZKQ9;Q8WTV0-2;Q8WTV0-4	0.0205137	0.00455388	0.11283	0.0135769	0.0246293	0.018713	0.537476	0.150863	0.0260175	0.0860698	0.0019257	0.00283103	0	0	0.12717	0	0	0	0.605785	0.170037	0	0.0970086	0	0
B7ZL88;Q8N8Q8	0.0769988	0.862972	0.00811164	0.00399271	0.00299955	0.0033419	0.00288087	0.00984934	0.00545426	0.00747861	0.0064239	0.00949645	0	1	0	0	0	0	0	0	0	0	0	0
B7ZLQ5;P28370	0.0398218	0.0100163	0.0245589	0.00480803	0.00301173	0.0155652	0.0896452	0.104555	0.444392	0.0617271	0.162674	0.0392249	0	0	0	0	0	0	0	0.146925	0.624479	0	0.228596	0
B7ZLQ8;E5RJM0;Q17RY0;Q17RY0-2	0.00669418	0.00112463	0.0975462	0.205389	0.0224327	0.285113	0.170053	0.139993	0.00998968	0.0279936	0.0243857	0.00928606	0	0	0.133985	0.282112	0	0.391617	0	0.192287	0	0	0	0
B7ZM79;Q5VT82;Q9HC56;Q9HC56-2	0.00813612	0.0317834	0.205486	0.00311149	0.0626637	0.0114138	0.00799349	0.0255726	0.117963	0.00785899	0.144465	0.373552	0	0.0339598	0.219557	0	0.0669546	0	0	0	0.126041	0	0.154357	0.399131
B7ZM87	0.00609791	0.00122797	0.271053	0.0992634	0.00287223	0.0420699	0.00463055	0.00967866	0.0357737	0.00392916	0.34696	0.176444	0	0	0.303286	0.111068	0	0	0	0	0	0	0.38822	0.197426
B7ZM99	0.140226	0.740137	0.00751453	0.00265372	0.00178533	0.00355868	0.00813694	0.00796619	0.0389411	0.0351188	0.00617957	0.00778135	0.159282	0.840718	0	0	0	0	0	0	0	0	0	0
B8ZZ45;C9JIH3;Q4AE62;Q4AE62-2;Q4AE62-3;Q4AE62-4	0.00176322	0.00371295	0.00365152	0.0154126	0.00988236	0.00426395	0.00119779	0.00412616	0.0345408	0.0153173	0.591974	0.314158	0	0	0	0	0	0	0	0	0	0	0.653298	0.346702
B8ZZ47;H0Y714;Q96G21	0.0304534	0.0308656	0.00412669	0.00239269	0.00375686	0.00440604	0.00310442	0.0483724	0.853735	0.00892922	0.00357642	0.0062814	0	0	0	0	0	0	0	0	1	0	0	0
B8ZZA1;B8ZZQ6;B8ZZW7;H7C2N1;P06454;P06454-2	0.00581445	0.00459086	0.00897882	0.00552606	0.00262183	0.00400858	0.00323422	0.00987331	0.0133023	0.00450404	0.930087	0.00745887	0	0	0	0	0	0	0	0	0	0	1	0
B8ZZC8;B8ZZE3;B8ZZY8;Q9NRN9	0.00423207	0.00522572	0.0142817	0.00254908	0.00547908	0.00314213	0.00226703	0.0324666	0.00661688	0.0018109	0.607504	0.314424	0	0	0	0	0	0	0	0	0	0	0.658949	0.341051
B8ZZD4;Q86VP1;Q86VP1-2	0.0150335	0.000446673	0.0574547	0.460363	0.0261613	0.0512967	0.0335422	0.0880493	0.0203915	0.0493257	0.165507	0.0324279	0	0	0	0.644839	0	0	0	0.123332	0	0	0.231829	0
B8ZZG1;Q9NZW5	0.0475981	0.0450838	0.0456292	0.00877226	0.00685575	0.00238225	0.00498584	0.114817	0.0575849	0.00890638	0.405068	0.252318	0	0.051532	0	0	0	0	0	0.131238	0.065821	0	0.463003	0.288406
B8ZZI5;O75716	0.00532864	0.00166576	0.00772463	0.652117	0.0778004	0.0509084	0.189559	0.00545441	0.00165916	0.000903449	0.00333416	0.00354497	0	0	0	0.893412	0.106588	0	0	0	0	0	0	0
B8ZZJ6;H7C1S9;Q8TD22	0.149376	0.775843	0.00615543	0.00322146	0.00270633	0.00384875	0.0151922	0.0106697	0.0050813	0.0128706	0.00717403	0.00786119	0.161449	0.838551	0	0	0	0	0	0	0	0	0	0
B8ZZK5;O43924	0.00464176	0.00460283	0.0316594	0.0138809	0.00288624	0.0061568	0.00224078	0.00314456	0.00775378	0.00277563	0.805931	0.114327	0	0	0	0	0	0	0	0	0	0	1	0
B8ZZN6;P63165	0.00739456	0.00665638	0.013777	0.024074	0.00225115	0.00610912	0.00191873	0.0141765	0.221775	0.00713953	0.683909	0.0108191	0	0	0	0	0	0	0	0	0.24487	0	0.75513	0
B8ZZU6;P15336;P15336-5	0.0649481	0.0182092	0.00690244	0.00513583	0.00751027	0.00851488	0.00225262	0.0700003	0.766748	0.0376076	0.00813298	0.00403796	0	0	0	0	0	0	0	0	1	0	0	0
B8ZZV9;B8ZZX2;Q9H8M1;Q9H8M1-2	0.0500333	0.853805	0.00434955	0.00335298	0.00244505	0.00346951	0.00238456	0.00659716	0.0192065	0.0392936	0.00686744	0.00819492	0	1	0	0	0	0	0	0	0	0	0	0
B8ZZZ1;F8W8K9;G5E966;Q96PC3;Q96PC3-2;Q96PC3-3;Q96PC3-4	0	0	0.00861321	0.662847	0.0370088	0.0373367	0.00135432	0.00650988	0.230839	0	0.00350561	0.0119855	0	0	0	0.7417	0	0	0	0	0.2583	0	0	0
B9A057;Q86WW8	0.0111426	0.899777	0.0119491	0.00436331	0.010563	0.00225202	0.00138268	0.0240038	0.0141108	0.00515649	0.00546435	0.00983475	0	1	0	0	0	0	0	0	0	0	0	0
B9EGA3;J3KMX2;Q92925;Q92925-2;Q92925-3	0.0818104	0.0162496	0.0105525	0.00167116	0.00330357	0.00552841	0	0.095589	0.535178	0.181169	0.0634327	0.00551562	0	0	0	0	0	0	0	0.11773	0.659139	0.223132	0	0
B9TWZ6;K7EKS6;Q9Y2X0;Q9Y2X0-2;Q9Y2X0-3;Q9Y2X0-4;Q9Y2X0-5;U3KQ43;U3KQB4	0.0110899	0.0238227	0.0116476	0.0220744	0.0406597	0.00926626	0.00817124	0.00990453	0.312066	0.00887035	0.018161	0.524266	0	0	0	0	0	0	0	0	0.373136	0	0	0.626864
B9ZVN9;O95602	0.0263371	0.0572382	0.103702	0.0408331	0.017339	0.0205037	0.0111855	0.0910216	0.129846	0.0296189	0.0326748	0.4397	0	0.0696745	0.126233	0	0	0	0	0.110798	0.158059	0	0	0.535235
C4AMC7;Q6VEQ5	0.00213743	0.0014908	0.0329221	0.0968851	0.0127744	0.0026827	0.00380128	0.00809194	0.00235841	0.00277163	0.56786	0.266224	0	0	0	0.104069	0	0	0	0	0	0	0.609966	0.285965
C4B7M2;Q96JI7;Q96JI7-2	0.0958373	0.0579343	0.140405	0.102845	0.0196034	0.0703484	0.0309013	0.0516866	0.0991962	0.133234	0.0205931	0.177415	0	0.0814794	0.197467	0.144643	0	0	0	0	0.139511	0.187382	0	0.249518
C9IYC4;Q9UK00;Q9UK00-2	0.000228522	0.00024811	0.00901331	0.472632	0.265269	0.230666	0.00260432	0.00767977	0.00123023	0.000627696	0.00594613	0.00385455	0	0	0	0.487971	0.273878	0.238152	0	0	0	0	0	0
C9IZ93;C9J9P8;C9JF62;Q969M7;Q969M7-2;Q969M7-3;Q969M7-7	0.00628072	0.00460167	0.00824048	0.0105112	0.00336355	0.00356362	0.00294816	0.00760034	0.0153946	0.00490595	0.922624	0.00996544	0	0	0	0	0	0	0	0	0	0	1	0
C9IZF6;P41247;P41247-2	0.0231965	0.88734	0.00765567	0.00599346	0.00380105	0.00320389	0.00429044	0.0112128	0.00765476	0.0283273	0.00608791	0.011236	0	1	0	0	0	0	0	0	0	0	0	0
C9IZU8;C9J9T0;Q96AT9	0.00271112	0.00290047	0.00234183	0.0108326	0.00485376	0.00957128	0.00175518	0.00451214	0.00483404	0.00640232	0.742091	0.207194	0	0	0	0	0	0	0	0	0	0	0.781737	0.218263
C9J066;Q8N4C6;Q8N4C6-10;Q8N4C6-2;Q8N4C6-4;Q8N4C6-5;Q8N4C6-7;Q8N4C6-9	0.00563053	0.0817013	0.0096985	0.117487	0.0676423	0.214917	0.0464497	0.0381961	0.00541156	0.0381199	0.00465085	0.370096	0	0.0959112	0	0.137921	0.079407	0.252296	0	0	0	0	0	0.434465
C9J0E4;P01040	0.00650167	0.00380299	0.0100556	0.00930436	0.00276975	0.00364127	0.00320535	0.0210282	0.0158852	0.00508678	0.912467	0.00625156	0	0	0	0	0	0	0	0	0	0	1	0
C9J0I9;Q86WB0;Q86WB0-2	0.00600757	0.00447811	0.043124	0.00818616	0.00313155	0.00863366	0.00150252	0.0380414	0.286745	0.00850289	0.563765	0.0278822	0	0	0	0	0	0	0	0	0.337145	0	0.662855	0
C9J0J0;Q96EE4	0.0086444	0.00244336	0.00363991	0.00111857	0.801399	0.00195497	0.158112	0.0171017	0.000567745	0.00143088	0.00134502	0.00224169	0	0	0	0	1	0	0	0	0	0	0	0
C9J0J7;G5E9Q6;P35080-2	0.00789655	0.00335623	0.00412751	0.00751362	0.00281017	0.00751337	0.00277666	0.00563583	0.161359	0.0069422	0.755421	0.034648	0	0	0	0	0	0	0	0	0.176006	0	0.823994	0
C9J0K6;P30626;P30626-2	0.00586082	0.00407509	0.00705208	0.00656858	0.00361767	0.00352181	0.00319976	0.00614172	0.0065995	0.00301856	0.942446	0.00789888	0	0	0	0	0	0	0	0	0	0	1	0
C9J0Q5;C9JE98	0.012248	0.24142	0.0143223	0.00219891	0.0022022	0.00779453	0.00492133	0.0383939	0.642937	0.0069716	0.0152186	0.011372	0	0.272989	0	0	0	0	0	0	0.727011	0	0	0
C9J0T6;H7C1P7;Q9H0T7	0.00405979	0.00281934	0.0189203	0.00846807	0.00725801	0.0090112	0.00232693	0.0097395	0.0389308	0.00397917	0.843242	0.0512445	0	0	0	0	0	0	0	0	0	0	1	0
C9J0Y3	0.00144336	0.00102961	0.00462864	0.10076	0.620286	0.0150496	0.207443	0.0460515	9.81465e-05	0.000867206	0.00148246	0.000860851	0	0	0	0.108521	0.66806	0	0.22342	0	0	0	0	0
C9J1P0;C9JZB1;Q96HH4	0.101597	0.000415836	0.0227834	0.654766	0.10588	0.0079878	0.00286816	0.0386433	0.0501679	0.000696506	0.0124454	0.0017493	0	0	0	0.860803	0.139197	0	0	0	0	0	0	0
C9J2C0;Q9NY65;Q9NY65-2	0.00206916	0.00828617	0.600861	0.0155528	0.009375	0.0929266	0.00387759	0.00243704	0.0942128	0.000505778	0.104331	0.0655644	0	0	0.762514	0	0	0.117927	0	0	0.119559	0	0	0
C9J2H1;G5E9D8;Q86UX2;Q86UX2-2	0.0376755	0.00505788	0.0986123	0.0814188	0.108943	0.134539	0.108109	0.1268	0.0431125	0.0590098	0.00235128	0.194371	0	0	0.132422	0.109333	0.146295	0.180666	0	0.170273	0	0	0	0.261011
C9J2P9;Q75N03;Q75N03-2	0.0339224	0.0867709	0.00810569	0.00220673	0.252602	0.00411658	0.00389901	0.0253782	0.569957	0.00372916	0.00466112	0.00465082	0	0.0954229	0	0	0.277789	0	0	0	0.626788	0	0	0
C9J2Y9;P30876	0.00810356	0.00519665	0.0108683	0.0471275	0.00458968	0.0251813	0.0050039	0.00614757	0.0373455	0.0112097	0.0459108	0.793316	0	0	0	0	0	0	0	0	0	0	0	1
C9J384;Q9BQ75;Q9BQ75-2	0.000936504	0.00725207	0.0151781	0.244603	0.13042	0.420267	0.0013099	0.00410474	0.11306	0.00268045	0.00279997	0.057388	0	0	0	0.269283	0.143579	0.462671	0	0	0.124467	0	0	0
C9J3D7;Q9UKG9;Q9UKG9-3	0.23174	0.156895	0.00452698	0.0125455	0.237946	0.00155351	0.00470821	0.00264461	0.00248847	0.331626	0.00414657	0.00917943	0.241848	0.163738	0	0	0.248324	0	0	0	0	0.34609	0	0
C9J406	0.0385603	0.89831	0.00542896	0.00389565	0.00237633	0.00350774	0.00632611	0.00797392	0.00661134	0.0125769	0.00600888	0.00842422	0	1	0	0	0	0	0	0	0	0	0	0
C9J494;Q9H000	0.00254148	0.0114533	0.0375892	0.0155829	0.00564591	0.0408309	0.00211751	0.00649166	0.00701138	0.0033111	0.632061	0.235363	0	0	0	0	0	0	0	0	0	0	0.728664	0.271336
C9J4B6;G5E9P4;Q8N755;Q8N755-2	0.0203641	0.00177522	0.472052	0.00541024	0.457149	0.00576075	0.00825888	0.00452655	0.0107255	0.000327712	0.00744426	0.00620502	0	0	0.508019	0	0.491981	0	0	0	0	0	0	0
C9J4I9	0.00373439	0.0187217	0.248915	0.247345	0.191105	0.00136621	0.17018	0.110642	0.0022911	0.00335007	0.00168293	0.000666437	0	0	0.31192	0.309954	0.239478	0	0	0.138648	0	0	0	0
C9J4Z3;P61513	0.0023661	0.00367292	0.00703409	0.0319188	0.00736419	0.887506	0.0161936	0.00444766	0.0112342	0.00613737	0.00571048	0.0164143	0	0	0	0	0	1	0	0	0	0	0	0
C9J5N1;Q9BTE6;Q9BTE6-2;Q9BTE6-3	0.00375049	0.00359732	0.00649841	0.00908644	0.00261166	0.00725529	0.00303832	0.00419147	0.00774178	0.00356602	0.898196	0.0504665	0	0	0	0	0	0	0	0	0	0	1	0
C9J5X1;P08069	0.00062616	0	0.00856821	0.267779	0.275427	0.0434346	0.149891	0.107988	0.137367	7.44868e-05	0.00469168	0.00415197	0	0	0	0.339579	0.349278	0	0	0.136943	0.1742	0	0	0
C9J623;C9JG63;H7C3Y6;Q7Z698;Q7Z698-2	0.00439809	0.00883879	0.00653733	0.0329369	0.068811	0.409606	0.00552968	0.172293	0.170597	0.0010504	0.113882	0.00552103	0	0	0	0	0.0837824	0.498725	0	0.209779	0.207714	0	0	0
C9J6P4	0.01249	0.00356231	0.0522884	0.0520819	0.0185025	0.406336	0.325137	0.057109	0.0238147	0.0391231	0.00455625	0.00499889	0	0	0	0	0	0.555504	0.444496	0	0	0	0	0
C9J798;E7ERK1;F5GXT2;F8W6L0;O43374;O43374-2	0.0483395	0	0.0101474	0.413658	0.506404	0	0.00087769	6.89057e-05	0.00623282	0.00126882	0.00604559	0.00695739	0	0	0	0.449598	0.550402	0	0	0	0	0	0	0
C9J7E5;Q9Y5L0;Q9Y5L0-1;Q9Y5L0-3	0.00550247	0.00409753	0.0124598	0.0571717	0.00210887	0.0107363	0.00373451	0.00540219	0.110394	0.00812004	0.708546	0.0717267	0	0	0	0	0	0	0	0	0.134801	0	0.865199	0
C9J7I0	0.00582805	0.00302657	0.00567373	0.00648861	0.00450166	0.00262152	0.00382026	0.00723244	0.00896001	0.00366037	0.928679	0.0195077	0	0	0	0	0	0	0	0	0	0	1	0
C9J7K9;O15162;O15162-2	0.010356	0.206408	0.00591314	0.00330777	0.189289	0.00469906	0.079955	0.175259	0.0917206	0.22762	0.00207947	0.00339339	0	0.231842	0	0	0.212613	0	0	0.196855	0.103023	0.255667	0	0
C9J813	0.00650588	0.00354692	0.00876884	0.0110437	0.00385978	0.00413045	0.00300261	0.00901248	0.0121362	0.00460255	0.922809	0.010582	0	0	0	0	0	0	0	0	0	0	1	0
C9J8E1;Q16644	0.00751998	0.00921841	0.0137487	0.00497399	0.00709977	0.00414692	0.00204427	0.00723582	0.0126689	0.00307239	0.695142	0.233129	0	0	0	0	0	0	0	0	0	0	0.748856	0.251144
C9J8U3;Q7Z2E3;Q7Z2E3-10;Q7Z2E3-11;Q7Z2E3-5;Q7Z2E3-7;Q7Z2E3-9	0.00422487	0.00274175	0.0130827	0.0332186	0.00654305	0.783298	0.0388812	0.0110193	0.0644867	0.0148735	0.00395993	0.0236708	0	0	0	0	0	0.923935	0	0	0.076065	0	0	0
C9J9M8;C9JRX4;Q86Y13;Q86Y13-2	0.0164328	0.318185	0.496229	0.0100656	0.0145616	0.00264703	0.000477913	0.00537393	0.0780787	0.0488769	0.00166717	0.0074044	0	0.356513	0.556003	0	0	0	0	0	0.0874839	0	0	0
C9J9Z5;J3KQ06;Q9NWC5	0	0	0.00390925	0.65067	0.329089	0.00424904	0.00104639	0.00516092	0	0	0.00442513	0.00145042	0	0	0	0.664113	0.335887	0	0	0	0	0	0	0
C9JA08;Q96D46	0.0057026	0.134682	0.0480884	0.103839	0.0879863	0.164768	0.00473436	0.0384976	0.102178	0.0811925	0.137161	0.0911704	0	0.165904	0	0.127912	0.108383	0.202965	0	0	0.125865	0.100015	0.168957	0
C9JA28;Q9UNL2;Q9UNL2-2	0.019204	0.230966	0.0140551	0.0179949	0.465555	0.0119619	0.0215804	0.0136179	0.0138022	0.178524	0.00148676	0.0112523	0	0.263948	0	0	0.532035	0	0	0	0	0.204017	0	0
C9JAW5;C9JNU6;Q9Y241	NaN	NaN	NaN	NaN	NaN	NaN	NaN	NaN	NaN	NaN	NaN	NaN	NaN	NaN	NaN	NaN	NaN	NaN	NaN	NaN	NaN	NaN	NaN	NaN
C9JAX1;Q16595	0.031349	0.887406	0.00488344	0.00380082	0.00259078	0.00318617	0.00314558	0.00834336	0.0123773	0.0279547	0.00741972	0.00754283	0	1	0	0	0	0	0	0	0	0	0	0
C9JBG5;Q8NBJ9;Q8NBJ9-2	0.0137892	0.00364591	0.026706	0.0387098	0.0641296	0.105045	0.565397	0.113615	0.00559271	0.0599579	0.00243769	0.000974635	0	0	0	0	0.0756079	0.123846	0.666596	0.13395	0	0	0	0
C9JBI3;P78330	0.00500507	0.00459497	0.00486333	0.00545047	0.00330232	0.00430895	0.00315427	0.00538332	0.00700045	0.00319556	0.94083	0.0129114	0	0	0	0	0	0	0	0	0	0	1	0
C9JBX0;F5H0R1;H3BRB1;Q9H6E5	0.0219101	0.00299771	0.0040801	0.07811	0.0407342	0.000646001	0.000962042	0.0103619	0.391421	0.0138113	0.307128	0.127838	0	0	0	0	0	0	0	0	0.473654	0	0.371652	0.154695
C9JBY7;Q9Y291	0.0233892	0.907906	0.00772765	0.00461424	0.00191414	0.0025764	0.00257757	0.00939353	0.0167716	0.00764	0.00632623	0.00916322	0	1	0	0	0	0	0	0	0	0	0	0
C9JC84;C9JEU5;P02679;P02679-2	0.00265489	0.00701768	0.836741	0.00319223	0.0068519	0.00253857	0.00414628	0.00339791	0.12208	0	0.00643444	0.00494501	0	0	0.872677	0	0	0	0	0	0.127323	0	0	0
C9JCC6;Q14919;Q14919-2	0.00492855	0.00813038	0.0282214	0.0201246	0.0037667	0.00422363	0.00219838	0.0349816	0.21808	0.00175598	0.66356	0.0100284	0	0	0	0	0	0	0	0	0.247358	0	0.752642	0
C9JDJ8;C9JNZ0;C9JRY4;Q96IW7	0.00296259	0.00121041	0.00534939	0.142256	0.80798	0.00396558	0.00990156	0.0205634	0.000657301	0.000932656	0.00178713	0.00243426	0	0	0	0.149706	0.850294	0	0	0	0	0	0	0
C9JEA7;Q9BRC7	0.002528	0.00370554	0.0134626	0.0189097	0.00291476	0.02388	0.00303619	0.00315849	0.00465695	0.004458	0.784429	0.13486	0	0	0	0	0	0	0	0	0	0	0.853299	0.146701
C9JEH3;C9JG97;Q13685	0.00312521	0.00423333	0.00366992	0.00817046	0.00271852	0.00577549	0.00304964	0.00458261	0.00739395	0.00348299	0.930755	0.0230425	0	0	0	0	0	0	0	0	0	0	1	0
C9JEJ2;P49585	0.00396379	0.00257682	0.0226063	0.0488335	0.00244548	0.0809413	0.00997494	0.00563973	0.0112003	0.00642678	0.700934	0.104457	0	0	0	0	0	0.103522	0	0	0	0	0.896478	0
C9JEX3;Q13614;Q13614-2	0.00733903	0.00575659	0.0739986	0.186276	0.002839	0.306298	0.00699682	0.0145663	0.0335217	0.0079442	0.14399	0.210474	0	0	0.0803427	0.202246	0	0.332558	0	0	0	0	0.156335	0.228519
C9JF17;P05090	0.153169	0.0213575	0.0973023	0.0152237	0.178333	0.00782813	0.141617	0.0810651	0.222715	0.07748	0.00225333	0.00165551	0.210108	0	0.133474	0	0.244627	0	0	0	0.305508	0.106283	0	0
C9JFE4;Q13098;Q13098-5;Q13098-7	0.00734886	0.00416763	0.00562324	0.0281983	0.00402544	0.00387548	0.00409943	0.00282028	0.0145386	0.00471748	0.372746	0.547839	0	0	0	0	0	0	0	0	0	0	0.404901	0.595099
C9JFR7;P99999	0.0340211	0.854445	0.00803898	0.00462136	0.00263396	0.00325474	0.00335289	0.019572	0.0481581	0.00641023	0.00644321	0.0090483	0	1	0	0	0	0	0	0	0	0	0	0
C9JFV4;Q8IZL8	0.0892297	0.015655	0.0107709	0.00203983	0.003435	0.00575953	0.00387418	0.0746914	0.774307	0.011957	0.00424076	0.00403998	0	0	0	0	0	0	0	0	1	0	0	0
C9JH25;C9JH25-2;C9JH25-3;C9JVX5	0.266718	0.0130892	0.011247	0.00171442	0.203532	0.00152053	0.180217	0.22689	0.00264509	0.0800331	0.00290894	0.0094839	0.34319	0	0	0	0.261887	0	0	0.291943	0	0.10298	0	0
C9JIF9;P13798	0.00505647	0.00429207	0.0054312	0.00931635	0.00485061	0.0243549	0.00408007	0.00364157	0.00433105	0.00628419	0.246141	0.682221	0	0	0	0	0	0	0	0	0	0	0.265134	0.734866
C9JIJ9;Q6XE24-3	0.00376857	0.00403869	0.0113399	0.0151342	0.0291843	0.205461	0.522893	0.0447311	0.00134182	0.155421	0.00273132	0.00395489	0	0	0	0	0	0.232481	0.591659	0	0	0.17586	0	0
C9JIK8;Q9Y4P1;Q9Y4P1-2;Q9Y4P1-6	0.00720378	0.00528114	0.00539706	0.00412998	0.00444581	0.00420578	0.00240962	0.00778052	0.0541605	0.00695947	0.887781	0.0102456	0	0	0	0	0	0	0	0	0	0	1	0
C9JJ19;P82930	0.278446	0.506697	0.0203199	0	0.000213864	0.00199851	0.000657144	0.0816436	0.0138432	0.00344147	0.0904	0.00233943	0.354644	0.645356	0	0	0	0	0	0	0	0	0	0
C9JJN9;Q8N3P4;Q8N3P4-3	0.0018196	0.00140862	0.0121069	0.114956	0.00558726	0.00756759	0.00581525	0.00249886	0.00133386	0.00209983	0.220131	0.624675	0	0	0	0.119776	0	0	0	0	0	0	0.22936	0.650864
C9JJU7;Q9NSI2;Q9NSI2-2	NaN	NaN	NaN	NaN	NaN	NaN	NaN	NaN	NaN	NaN	NaN	NaN	NaN	NaN	NaN	NaN	NaN	NaN	NaN	NaN	NaN	NaN	NaN	NaN
C9JJV1;Q9Y5U2;Q9Y5U2-2	0.0143489	0.167642	0.00607683	0.00364635	0.0061308	0.00419786	0.00486924	0.149808	0.0678976	0.0403713	0.461146	0.0738643	0	0.198043	0	0	0	0	0	0.176975	0.0802103	0	0.544772	0
C9JKA9;Q9NS87;Q9NS87-2;Q9NS87-3	0.00383763	0.0210287	0.0285617	0.00572523	0.00535161	0.00397395	0.00211357	0.148609	0.0972862	0.00769822	0.673441	0.00237333	0	0	0	0	0	0	0	0.161648	0.105822	0	0.73253	0
C9JKI3	NaN	NaN	NaN	NaN	NaN	NaN	NaN	NaN	NaN	NaN	NaN	NaN	NaN	NaN	NaN	NaN	NaN	NaN	NaN	NaN	NaN	NaN	NaN	NaN
C9JKL2;C9JPX5;O95772	0.0479443	0.0121986	0.00725496	0.0452312	0.00832905	0.0221474	0.340712	0.0343026	0.0104179	0.435592	0.00787173	0.0279973	0	0	0	0	0	0	0.43889	0	0	0.56111	0	0
C9JLB7;Q96HP4;U3KQU8	0.104672	0.82916	0.00407455	0.00280441	0.00219209	0.00298207	0.0136002	0.0152838	0.00808506	0.00605705	0.00493889	0.00615002	0	1	0	0	0	0	0	0	0	0	0	0
C9JLU1;P52434	0.00724099	0.00566836	0.0271155	0.0140177	0.00141151	0.0582781	0.000859583	0.0449214	0.412909	0.011773	0.33737	0.0784344	0	0	0	0	0	0	0	0	0.55034	0	0.44966	0
C9JLW8;I3L2L5;I3L4Q0	0.017865	0.0013144	0.0518745	0.041793	0.00179118	0.0451349	0.0134019	0.216248	0.127125	0.0527473	0.420699	0.0100067	0	0	0	0	0	0	0	0.28302	0.166378	0	0.550602	0
C9JME2;Q9Y4F1;Q9Y4F1-2	0.190158	0.021041	0.16107	0.00940185	0.00243024	0.00636358	0.135197	0.160706	0.111811	0.0108186	0.190174	0.000828591	0.233632	0	0.197894	0	0	0	0	0.197448	0.137374	0	0.233652	0
C9JMP5;C9JT95;F8WAF5;H7C0W4;Q96AH0;Q96AH0-2;Q96AH0-3;Q9BQ15	0.00393577	0.0264171	0.501223	0.0010208	0.00259011	0.00189071	0.000470672	0.0235434	0.430095	0	0.00607798	0.0027358	0	0	0.538187	0	0	0	0	0	0.461813	0	0	0
C9JNE2;Q9Y530	0.00113762	0.00625559	0.0155612	0.0227932	0.00284167	0.346498	0.00119542	0.0552053	0.402772	0.00322396	0.113342	0.0291739	0	0	0	0	0	0.462448	0	0	0.537552	0	0	0
C9JNG9	0.214183	0.0508132	0.00707427	0.305863	0.00442545	0.00765479	0.0316512	0.165427	0.0398744	0.167921	0.00149436	0.00361787	0.236873	0.0561964	0	0.338267	0	0	0	0.182953	0	0.185711	0	0
C9JP85;Q16656;Q16656-2;Q16656-4	0.00628741	0.0180338	0.00822329	0.00334619	0.00505048	0.00489525	0.00474555	0.0195304	0.912038	0.00673347	0.00414279	0.00697383	0	0	0	0	0	0	0	0	1	0	0	0
C9JQ41;H7C525;Q4VC31	0.0352647	0.691978	0.209114	0.00454321	0.00410765	0.00346139	0.00150418	0.0215813	0.00728444	0.00642004	0.00699881	0.00774188	0	0.767933	0.232067	0	0	0	0	0	0	0	0	0
C9JQD4;O43447	0.0129134	0.0181961	0.0216834	0.00533086	0.00300867	0.00326404	0.00207093	0.0288039	0.278796	0.00823795	0.605816	0.0118781	0	0	0	0	0	0	0	0	0.315162	0	0.684838	0
C9JQV0;H7C0T1;H7C2R9;Q9BRJ6	0.00279856	0.00111925	0.00611892	0.00800874	0.0379808	0.857626	0.00621539	0.0049744	0.0351172	0.0104683	0.00566745	0.0239045	0	0	0	0	0	1	0	0	0	0	0	0
C9JRL4	0.0174919	0.00420599	0.00443894	0.00498873	0.0906152	0.00221397	0.00169858	0.00604061	0.194297	0.0165433	0.174775	0.482691	0	0	0	0	0.0961559	0	0	0	0.206177	0	0.185462	0.512205
C9JRZ6	0.200373	0.413001	0.0169617	0.000991416	0.00113848	0.00219902	0.00147796	0.0490809	0.0300918	0.0116663	0.208783	0.0642357	0.243716	0.502339	0	0	0	0	0	0	0	0	0.253945	0
C9JRZ8;C9JRZ8-2;O60218	0.00831026	0.00479601	0.0112684	0.0346467	0.00979211	0.00579021	0.00160054	0.0103331	0.0434178	0.00432558	0.703914	0.161806	0	0	0	0	0	0	0	0	0	0	0.813097	0.186903
C9JSG8;O15503;O15503-2	0.00571695	0.0133958	0.0142059	0.00669708	0.106686	0.0311475	0.7233	0.0606393	0.000783895	0.0338044	0.00285947	0.000763217	0	0	0	0	0.12854	0	0.87146	0	0	0	0	0
C9JWJ8;Q14938-3;Q14938-5	0.00886709	0.0029811	0.0190994	0.0409323	0.00749241	0.449805	0.0715283	0.0429663	0.2176	0.108538	0.00676981	0.02342	0	0	0	0	0	0.579688	0	0	0.280433	0.139879	0	0
C9JWV4;G5E9Q8;Q9H9Q4;Q9H9Q4-2	0.00294235	0.00560628	0.272143	0.00287957	0.00794188	0.00202917	0.00186394	0.0049811	0.00809401	0.000727084	0.21912	0.471672	0	0	0.282618	0	0	0	0	0	0	0	0.227555	0.489827
C9JYM0;O75817	0.0774467	0.00250425	0.0453183	0.0192374	0.00480874	0.14016	0.082378	0.0879267	0.261359	0.264028	0.00558935	0.00924385	0	0	0	0	0	0.186018	0	0.116695	0.346873	0.350414	0	0
C9JYQ9;H0Y8C2;Q6P5R6	0.11606	0.0121007	0.00361507	0.00832952	0.0229131	0.590199	0.0672841	0.0482511	0.073099	0.0515784	0.00285018	0.00371892	0.148918	0	0	0	0	0.757288	0	0	0.0937937	0	0	0
C9JYS5;J3KS67;J3QL47;J3QL63;K7ENL4;Q96ET8-3;Q9NYZ1	0.00135151	0.000575663	0.00721029	0.499773	0.0726892	0.317532	0.069141	0.00315339	0.00129066	0.00145684	0.00684911	0.018978	0	0	0	0.561546	0.0816738	0.35678	0	0	0	0	0	0
C9JYY6;Q92823;Q92823-3;Q92823-4;Q92823-6	0.0104679	0.0025902	0.158718	0.118982	0.00820836	0.011447	0.00965251	0.217787	0.103893	0.00450558	0.31832	0.0354289	0	0	0.172952	0.129652	0	0	0	0.237319	0.113211	0	0.346867	0
C9JZG9;C9JZY6;P62256	0.00216529	0.00508744	0.00321543	0.00808521	0.00386025	0.00778294	0.0029335	0.00347015	0.00662755	0.0016449	0.572403	0.382725	0	0	0	0	0	0	0	0	0	0	0.599295	0.400705
C9JZI7	0.00594695	0.00284955	0.00670571	0.00811667	0.00434898	0.00353229	0.00313042	0.00601686	0.00553096	0.00300823	0.92875	0.0220633	0	0	0	0	0	0	0	0	0	0	1	0
C9JZR2;O60716;O60716-2;O60716-3;O60716-5	0.107395	0.056968	0.176685	0.0409718	0.00776428	0.015824	0.144037	0.2845	0.101081	0.0191762	0.0354977	0.0101003	0.147799	0.0784004	0.243157	0	0	0	0	0.391534	0.13911	0	0	0
D3DPN2;O75056	0.0482826	0.0561662	0.00392283	0.000110322	0.648917	0	0	0.0463628	0.188548	0.00336394	0.00212514	0.00220161	0	0.0628517	0	0	0.726157	0	0	0	0.210991	0	0	0
D3DQV9;P78344	0.00176737	0.000116083	0.07987	0.3636	0.0288609	0.319835	0.0667606	0.0740513	0.00158336	0.0042453	0.0429111	0.0163988	0	0	0.104637	0.476349	0	0.419014	0	0	0	0	0	0
D3DWX8;P98173;P98173-2;P98173-3;Q5HY75	0.00414477	0.00209379	0.00898167	0.00561313	0.689417	0.00416808	0.221797	0.0593374	0.000629265	0.000174811	0.00153245	0.0021113	0	0	0	0	0.756592	0	0.243408	0	0	0	0	0
D3YTA9;F6U1T9;P63098	0.00515553	0.0872536	0.0174116	0.0107434	0.00390397	0.00165086	0.0021326	0.0292136	0.0264727	0.00404965	0.775844	0.0361681	0	0.101094	0	0	0	0	0	0	0	0	0.898906	0
D3YTB5;P51617;P51617-2;P51617-3;P51617-4	0.00170292	0.0110155	0.154707	0.000431034	0.00963615	0.0113471	0.0047498	0.00274525	0.0718048	0.00225539	0.356609	0.372997	0	0	0.161807	0	0	0	0	0	0.0751005	0	0.372976	0.390116
D3YTC7;Q9UBM1;Q9UBM1-2;Q9UBM1-3	0.00265489	0.00701768	0.836741	0.00319223	0.0068519	0.00253857	0.00414628	0.00339791	0.12208	0	0.00643444	0.00494501	0	0	0.872677	0	0	0	0	0	0.127323	0	0	0
D4PHA4;Q86WP2;Q86WP2-2;Q86WP2-3	0.00717352	0.261189	0.0109584	0.00428848	0.0198353	0.00192546	0.0934571	0.0307785	0.298958	0.255565	0.00356735	0.0123041	0	0.320198	0	0	0	0	0	0	0.3665	0.313303	0	0
D5H3J5;Q2L6G2	0.0829557	0.00704129	0.155344	0.00145279	0.429302	0.000431034	0.0853164	0.231184	0.0022413	0.00295573	0.00118813	0.000588292	0	0	0.190412	0	0.526215	0	0	0.283373	0	0	0	0
D6R927;Q06330;Q06330-4;Q06330-5;Q06330-6;Q06330-7	0.00182783	0.00162301	0.010945	0.132849	0.0010817	0.568066	0.00227732	0.0544142	0.182359	0.0222128	0.015413	0.00693081	0	0	0	0.150405	0	0.643136	0	0	0.206458	0	0	0
D6R938;Q13557;Q13557-10;Q13557-11;Q13557-12;Q13557-6;Q13557-8	0.0052776	0.004377	0.00753516	0.0141852	0.00512554	0.0186065	0.00392332	0.00525219	0.00780736	0.00675193	0.167148	0.75401	0	0	0	0	0	0	0	0	0	0	0.181454	0.818546
D6R9B6	0.00291896	0.00697038	0.00495416	0.00302076	0.0275124	0.885564	0.00221418	0.00222293	0.0527857	0.00333693	0.00209752	0.00640159	0	0	0	0	0	1	0	0	0	0	0	0
D6R9C3;H0UI06;P14406	0.257875	0.645712	0.0141408	0.00141537	0.00031053	0.00302674	0.00919828	0.0214878	0.0191913	0.0189596	0.00411742	0.00456561	0.28539	0.71461	0	0	0	0	0	0	0	0	0	0
D6R9Q7;E7ESU6;Q8NBW4;Q8NBW4-2	0.0831649	0.0165187	0.00640333	0.00540931	0.00530344	0.00526137	0.218152	0.00382577	0.0051743	0.645965	0.00374647	0.00107547	0	0	0	0	0	0	0.252456	0	0	0.747544	0	0
D6R9U3;D6RDB1;D6RGZ0;Q96QK8	NaN	NaN	NaN	NaN	NaN	NaN	NaN	NaN	NaN	NaN	NaN	NaN	NaN	NaN	NaN	NaN	NaN	NaN	NaN	NaN	NaN	NaN	NaN	NaN
D6RA57;D6RC31;D6RE67;H0Y9X1;Q96EY4	0.00297893	0.00854293	0.142977	0.0296369	0.00302781	0.0464795	0.00278462	0.00366505	0.261744	0.00341229	0.436898	0.0578522	0	0	0.169884	0	0	0	0	0	0.311	0	0.519116	0
D6RA82;P12429	0.0459238	0.0640476	0.0410928	0.00536039	0.00331949	0.00171088	0.00258306	0.0191506	0.161159	0.00542715	0.632341	0.0178844	0	0.074687	0	0	0	0	0	0	0.18793	0	0.737383	0
D6RAJ6;Q9UKT5;Q9UKT5-2	0.00285379	0.0087513	0.786982	0.0028573	0.00648486	0.00262166	0.00244517	0.00251333	0.173971	0	0.00545129	0.00506825	0	0	0.81896	0	0	0	0	0	0.18104	0	0	0
D6RAN8;Q9P0M9	0.0753589	0.827687	0.00781225	0.00333181	0.00205853	0.00388871	0.00596601	0.00757454	0.00930074	0.0428457	0.00550371	0.00867166	0	1	0	0	0	0	0	0	0	0	0	0
D6RB12;Q9BUD6	0.00265489	0.00701768	0.836741	0.00319223	0.0068519	0.00253857	0.00414628	0.00339791	0.12208	0	0.00643444	0.00494501	0	0	0.872677	0	0	0	0	0	0.127323	0	0	0
D6RB73;D6RE58;D6RHG0;P78383;P78383-2	0.0575528	0.00479604	0.00759906	0.0376829	0.461633	0.00344411	0.376703	0.0235431	0.00107003	0.0232546	0.000316495	0.00240445	0	0	0	0	0.550654	0	0.449346	0	0	0	0	0
D6RB81;Q9UHK6;Q9UHK6-2;Q9UHK6-4;Q9UHK6-5;V9GYP4;V9GYU9;V9GZ45	0.530983	0.364977	0.00198639	0.00262335	0.000797362	0.000836445	0.000416552	0.0262757	0.0230855	0.0389258	0.00489862	0.00419387	0.592641	0.407359	0	0	0	0	0	0	0	0	0	0
D6RBN4;P36406;P36406-2;P36406-3	0.004077	0.00467022	0.648266	0.00528242	0.0121028	0.00113955	0.0046695	0.00187079	0.0121075	0.00263252	0.1947	0.108482	0	0	0.76903	0	0	0	0	0	0	0	0.23097	0
D6RBY0;D6RJG8;Q8TAC1;Q8TAC1-2	0.00588733	0.0920503	0.0329065	0.000563252	0.00640843	0.00184661	0.00247793	0.022977	0.327988	0.00653813	0.495701	0.00465637	0	0.10052	0	0	0	0	0	0	0.358167	0	0.541312	0
D6RC81	0.00684196	0.00520406	0.0063656	0.00657318	0.00391916	0.00278992	0.00309757	0.00965658	0.0186503	0.00421083	0.927235	0.00545544	0	0	0	0	0	0	0	0	0	0	1	0
D6RCC7;Q9P2D6;Q9P2D6-2;Q9P2D6-3;Q9P2D6-4	0.00192161	0.00102637	0.180992	0.00161065	0.751833	0.000740161	0.00173527	0.0525168	0.00194598	0	0.00075448	0.00492336	0	0	0.194026	0	0.805974	0	0	0	0	0	0	0
D6RCD0;Q8NBQ5	0.0316424	0.00596709	0.653577	0.00312706	0.0164186	0.0033752	0.193911	0.0160312	0.0666178	0.000691715	0.00465304	0.00398778	0	0	0.71499	0	0	0	0.212132	0	0.0728776	0	0	0
D6RCM2;H0YAG5;Q9Y3D5	0.100656	0.432523	0.0452864	0.00229184	0.0109432	0.00255431	0.00154564	0.00810138	0.209464	0.178223	0.000416878	0.00799483	0	0.527332	0	0	0	0	0	0	0.255378	0.217289	0	0
D6RCP5;Q8N264;Q8N264-2;Q8N264-3	0.126506	0.63788	0.012976	0.00072986	0.0111077	0.0017156	0.000208138	0.00933319	0.0544601	0.0910518	0.00716011	0.0468721	0.147884	0.745677	0	0	0	0	0	0	0	0.106439	0	0
D6RCU0;Q9H5J4	0.0319537	0.00249955	0.0236541	0.0164615	0.310399	0.0326933	0.404747	0.0658196	0.0018198	0.102297	0.0042569	0.00339877	0	0	0	0	0.379719	0	0.495138	0	0	0.125143	0	0
D6RD26;D6RIS3;D6RIT3;Q8N1A6	0.00520019	0.00491612	0.00385817	0.00491355	0.00341416	0.00412491	0.00279017	0.0054071	0.0083227	0.00434168	0.941321	0.0113906	0	0	0	0	0	0	0	0	0	0	1	0
D6RDW7;H0Y8H1;Q9UKJ5	0.0726054	0.0194698	0.0056501	0.39114	0.191734	0.00516885	0.00162529	0.0509071	0.248207	0.00602945	0.00283714	0.00462563	0	0	0	0.47064	0.230705	0	0	0	0.298655	0	0	0
D6REA0;O75879	0.0796427	0.807299	0.00802886	0.00436292	0.00209068	0.0133453	0.0161971	0.0161921	0.00951088	0.03029	0.00530551	0.00773485	0	1	0	0	0	0	0	0	0	0	0	0
D6REK3;Q6UX04;Q6UX04-2	0.00425485	0.00606321	0.00360183	0.00522991	0.00983789	0.00630769	0.00214871	0.0283187	0.16304	0.00620591	0.555283	0.209707	0	0	0	0	0	0	0	0	0.175684	0	0.598346	0.22597
D6REQ6;D6RHI9;O00584	0.151379	0.0128884	0.00579369	0.00437023	0.0051066	0.00622834	0.0127112	0.00828873	0.0130313	0.771754	0.00479608	0.00365276	0.163984	0	0	0	0	0	0	0	0	0.836016	0	0
D6RER5;D6RGI3;Q9NVA2	0.0147918	0.00337261	0.170309	0.158454	0.00985618	0.0252742	0.0218861	0.0547414	0.0053209	0.0086374	0.351901	0.175455	0	0	0.198932	0.185084	0	0	0	0	0	0	0.411042	0.204943
D6REX3	0.000504203	0.000904868	0.0111359	0.281898	0.00427329	0.0789732	0.0022523	0.00188463	0.00115507	0.00170494	0.218511	0.396803	0	0	0	0.288775	0	0.0808999	0	0	0	0	0.223841	0.406483
D6REY2;P23508;P23508-2	0.00761086	0.00662991	0.00393402	0.00547638	0.0124015	0.00177651	0.00424533	0.00590674	0.00537841	0.00226072	0.324635	0.619745	0	0	0	0	0	0	0	0	0	0	0.343755	0.656245
D6RF23	0.0041585	0.0115126	0.00160469	0	0.00665458	0.403964	0	0.00996431	0.552188	0.00596612	0.00128212	0.00270515	0	0	0	0	0	0.422489	0	0	0.577511	0	0	0
D6RF48;Q9P2W9	0.0748504	0.00338748	0.105688	0.0455274	0.0297935	0.0157497	0.282131	0.11282	0.00558342	0.0141875	0.00433838	0.305943	0	0	0.131032	0	0	0	0.349786	0.139874	0	0	0	0.379308
D6RFG8;P27707	0.00817942	0.0259458	0.0329069	0.00305266	0.00839234	0.0020759	0.00317471	0.174848	0.0263796	0.00343753	0.678115	0.033492	0	0	0	0	0	0	0	0.204989	0	0	0.795011	0
D6RG30;Q2TB18;Q2TB18-2	0.00787296	0.00695366	0.00289392	0.0031237	0.0052389	0.273238	0.00390319	0.198178	0.460752	0.0038973	0.00410127	0.0298459	0	0	0	0	0	0.293121	0	0.212599	0.49428	0	0	0
D6RGG3;Q99715	0.0293856	0.00143002	0.137399	0.0263142	0.0207181	0.0782368	0.00731648	0.193102	0.148277	0.0299407	0.0869049	0.240975	0	0	0.172181	0	0	0.0980423	0	0.241986	0.185813	0	0	0.301977
D6RGK3;D6RHW1;D6RIE8;D6RIV9;D6RIY1;Q16594;Q9HBM6	0.0712997	0.00273098	0.0448797	0.0247516	0.008353	0.0135622	0.0856021	0.0939407	0.390596	0.248623	0.00776851	0.00789301	0	0	0	0	0	0	0	0.128131	0.532757	0.339112	0	0
D6RH26;Q5HY62;Q8TE69;Q8TE69-2;Q96DE9;S4R3G8	0.016606	0.723423	0.00288117	0.0243299	0.00815037	0.00123231	0.00134707	0.0289974	0.0167135	0.156483	0.00526652	0.0145702	0	0.822159	0	0	0	0	0	0	0	0.177841	0	0
D6RHD2;O43609	0.000573972	0	0.00611503	0.588094	0.176141	0.178635	0.0382241	0.00272805	0.000493114	0.00191318	0.00368159	0.00340055	0	0	0	0.623727	0.186814	0.189459	0	0	0	0	0	0
D6RHX8;P43250;P43250-2;P43250-3	0.00671482	0.0044207	0.00208094	0.450814	0.0176737	0.423751	0.00371707	0.00833241	0.0503018	0.0234202	0.0041431	0.00463107	0	0	0	0.515472	0	0.484528	0	0	0	0	0	0
D6RIG4;Q9HCL0;Q9HCL0-2	0.0893256	0.00523424	0.115809	0.205523	0.0610686	0.0261427	0.0980314	0.334492	0.0341233	0.00656541	0.0206405	0.00304441	0	0	0.161543	0.286686	0.0851851	0	0	0.466586	0	0	0	0
D6RJ07;Q9UL40	0.00642467	0.00327721	0.00935355	0.0237257	0.0081943	0.477529	0.130839	0.0265341	0.265598	0.0425276	0.0020227	0.00397427	0	0	0	0	0	0.642594	0	0	0.357406	0	0	0
D6RJ90;Q9Y6G5	0.00484285	0.00400007	0.0730272	0.0701228	0.0114369	0.00107376	0.00392617	0.00719204	0.0116987	0.00251104	0.482468	0.3277	0	0	0.0826852	0	0	0	0	0	0	0	0.546276	0.371039
E0CX11	0.0106947	0.0337853	0.640753	0.00264309	0.00730448	0.00288818	0.00422434	0.0104585	0.101904	0.000887894	0.181149	0.00330674	0	0.0352816	0.66913	0	0	0	0	0	0.106417	0	0.189171	0
E2QRB3;P32322;P32322-3	0.196765	0.69258	0.0177156	0.00250263	0.000889677	0.0040712	0.00925362	0.0194619	0.0312178	0.0157485	0.00434519	0.00544903	0.221247	0.778753	0	0	0	0	0	0	0	0	0	0
E5RFF3;H0YAV4;Q9UHF7;Q9UHF7-2;Q9UHF7-3	0.0142782	0.0401902	0.27397	0.00404177	0.00697745	0.00543193	0.00479398	0.0166517	0.615195	0.00472452	0.00605033	0.00769492	0	0.0432453	0.294795	0	0	0	0	0	0.661959	0	0	0
E5RFH6;E5RFU2;P34913	0.0393293	0.0341661	0.0119937	0.0340913	0.00432969	0.00342391	0.00198233	0.0197249	0.0183063	0.0105848	0.690437	0.131631	0	0.0399028	0	0	0	0	0	0	0	0	0.806365	0.153732
E5RFX4;Q96KB5;Q96KB5-2	0.0558514	0.129312	0.0843086	0.0040287	0.00490386	0.00960804	0.00149076	0.00995566	0.491391	0.18126	0.0136868	0.0142022	0	0.145906	0.0951272	0	0	0	0	0	0.554447	0.20452	0	0
E5RG17;Q6P1N9	0.00618855	0.0103272	0.00615074	0.0111436	0.00302063	0.0052684	0.00314164	0.00883045	0.0122096	0.00529377	0.897018	0.0314076	0	0	0	0	0	0	0	0	0	0	1	0
E5RG29	0.0498645	0.166055	0.00828326	0.00470571	0.0158879	0.00592119	0.52429	0.060741	0.00355873	0.155045	0.00296466	0.00268251	0	0.196425	0	0	0	0	0.620175	0	0	0.1834	0	0
E5RG44;E5RGJ1;E5RIT1;Q629K1	0.0667105	0.0159567	0.0343033	0.0110805	0.0115231	0.00806862	0.655921	0.0715538	0.0297417	0.0883378	0.00253456	0.00426851	0	0	0	0	0	0	0.881308	0	0	0.118692	0	0
E5RGR0;O75608;O75608-2	0.02087	0.0665427	0.0278282	0.0201588	0.00208804	0.00346123	0.0024978	0.0513659	0.0547502	0.00967889	0.709861	0.0308974	0	0.0857064	0	0	0	0	0	0	0	0	0.914294	0
E5RGS2;Q9H6H4	0.00795588	0.00393763	0.0345019	0.086687	0.11672	0.167156	0.484825	0.0289542	0.00360755	0.0522101	0.00350451	0.00993978	0	0	0	0.101342	0.136453	0.195415	0.56679	0	0	0	0	0
E5RGZ2;H0YKJ1;Q6NT76;Q6NT76-2;Q6NT76-3;Q6NT76-5	0.0972306	0.125346	0.00994868	0.00412378	0.00770701	0.000751722	0.00241242	0.0374088	0.633728	0.0685737	0.00618994	0.00657928	0	0.16513	0	0	0	0	0	0	0.83487	0	0	0
E5RHG8;Q15369	0.00510534	0.00380626	0.00533698	0.00750075	0.00320155	0.00427841	0.00320183	0.00614224	0.0113213	0.00481573	0.927078	0.0182113	0	0	0	0	0	0	0	0	0	0	1	0
E5RHG9	0.0542345	0.688553	0.00973146	0.0096132	0.019417	0.000976647	0.00193697	0.0194909	0.167761	0.0072276	0.0078498	0.0132085	0	0.80409	0	0	0	0	0	0	0.19591	0	0	0
E5RHJ2	0.0194297	0.0037845	0.325369	0.000719255	0.0448673	0.00844086	0.286237	0.00221566	0.276381	0.0206719	0.00352664	0.00835773	0	0	0.366412	0	0	0	0.322343	0	0.311245	0	0	0
E5RHN3;Q8TDQ0	0.00091785	0.000864842	0.0415514	0.548577	0.0858609	0.115951	0.136888	0.0549159	0.00709506	0.000232286	0.00406827	0.00307772	0	0	0	0.731057	0.114422	0.154521	0	0	0	0	0	0
E5RIA9;H0YAN3;Q9UJ68;Q9UJ68-2;Q9UJ68-3;Q9UJ68-4;Q9UJ68-5	0.0314734	0.0743251	0.0223966	0.0307442	0.00225658	0.0033773	0.00243776	0.0743967	0.0645029	0.0439512	0.632431	0.0177069	0	0.0963685	0	0	0	0	0	0	0.0836333	0	0.819998	0
E5RIH5;Q6NXR4	0.00227405	0.0099023	0.00486954	0.227948	0.0828197	0.370363	0.000609557	0.00476997	0.00740054	0.000674716	0.00265275	0.285715	0	0	0	0.235765	0.0856596	0.383063	0	0	0	0	0	0.295513
E5RIK9;Q96E29;Q96E29-2;Q96E29-3	0.0403458	0.819332	0.0136385	0.00207517	0.00300952	0.0023745	0.00175386	0.0067674	0.0385359	0.0567688	0.00469546	0.0107035	0	1	0	0	0	0	0	0	0	0	0	0
E5RIQ5;Q9BX73;Q9BX73-2	0.0964553	0.0370789	0.0245204	0.0166463	0.130381	0.00145479	0.0121499	0.16795	0.0614759	0.446941	0.00261102	0.00233444	0	0.0439413	0	0	0.154512	0	0	0.199034	0.0728536	0.52966	0	0
E5RIW3;E5RJD8;O75347	0.00577036	0.00437463	0.00889345	0.00706213	0.00286193	0.00349234	0.00307823	0.00774996	0.00768721	0.00334269	0.936555	0.00913224	0	0	0	0	0	0	0	0	0	0	1	0
E5RIW9;P28328	0.0857787	0.420056	0.0114744	0.0100691	0.308726	0.00338474	0.00104441	0.0290273	0.112651	0.000857051	0.00825726	0.00867399	0	0.499215	0	0	0.366905	0	0	0	0.13388	0	0	0
E5RJ29;Q9NYI0;Q9NYI0-2	0.0934888	0.0954951	0.333707	0.0506291	0.106615	0.00362564	0.0026221	0.125214	0.0446268	0.00219241	0.00396486	0.137819	0	0.119541	0.417734	0	0.133461	0	0	0.156742	0	0	0	0.172522
E5RK69	0.00686346	0.00782246	0.00652973	0.0108662	0.0030908	0.014269	0.00237899	0.00681932	0.0454881	0.00284682	0.779826	0.113199	0	0	0	0	0	0	0	0	0	0	1	0
E7EM57	0.00591616	0.0058516	0.0199882	0.00518954	0.00613193	0.00292396	0.00256418	0.00464089	0.00605972	0.00180887	0.423431	0.515494	0	0	0	0	0	0	0	0	0	0	0.450974	0.549026
E7EM64;Q7L5N1	0.00354209	0.00435424	0.00452323	0.0149194	0.00562411	0.00541628	0.00292268	0.00491926	0.00667656	0.00344072	0.346212	0.597449	0	0	0	0	0	0	0	0	0	0	0.366882	0.633118
E7EMN6	0.0148347	0.00457845	0.0410893	0.0379555	0.00726318	0.00444796	0.00579517	0.0448743	0.0234713	0.0170665	0.763905	0.034719	0	0	0	0	0	0	0	0	0	0	1	0
E7EMP6;Q96FZ2	0.0068693	0.0054639	0.0388794	0.165072	0.0323512	0.0307622	0.0116022	0.062717	0.113665	0.0402069	0.309786	0.182624	0	0	0	0.214061	0	0	0	0	0.147398	0	0.40172	0.236821
E7EMS2;G3V3D1;G3V3E8;J3KMY5;P61916	0.0416528	0.00977353	0.00483167	0.00923321	0.00439349	0.0100519	0.0128016	0.00669342	0.0269598	0.859617	0.00399465	0.00999657	0	0	0	0	0	0	0	0	0	1	0	0
E7EMZ9;E9PBC6;O95359;O95359-3	0.00294251	0.00256014	0.0138322	0.0410613	0.00351999	0.0137766	0.00404829	0.00542915	0.00450645	0.00346769	0.804366	0.10049	0	0	0	0	0	0	0	0	0	0	1	0
E7EN19;O95819-6	0.160112	0.0394662	0.147292	0.209513	0.0170413	0.273316	0.026119	0.0387079	0.0486273	0.00395906	0.0145324	0.0213139	0.192976	0.0475669	0.177524	0.252517	0	0.329416	0	0	0	0	0	0
E7EN65;E7ENM0;G3V0G6;P15502;P15502-1;P15502-10;P15502-12;P15502-13;P15502-2;P15502-4;P15502-5;P15502-6;P15502-7;P15502-9	0.00266638	0.00733106	0.835535	0.00311234	0.00684739	0.00251134	0.00413534	0.00340818	0.123037	0	0.00644055	0.00497534	0	0	0.871645	0	0	0	0	0	0.128355	0	0	0
E7EN73;Q8IZA0;Q8IZA0-2	0.000292685	0.000216591	0.00842227	0.534987	0.213025	0.0919308	0.141163	0.0031423	0	0.000749224	0.00342326	0.00264786	0	0	0	0.636932	0.253619	0.109449	0	0	0	0	0	0
E7ENY0;P35611-3;P35611-6	0.00517046	0.00678055	0.0243954	0.24601	0.00530458	0.296619	0.00449838	0.0351974	0.0429732	0.040354	0.0512021	0.241495	0	0	0	0.313739	0	0.37828	0	0	0	0	0	0.307981
E7EP72;Q9UFG5	0.128061	0.0343885	0.333977	0.0249665	0.00344258	0.0117301	0.111407	0.226999	0.036114	0.0201999	0.066239	0.00247543	0.177021	0.0475356	0.461661	0	0	0	0	0.313783	0	0	0	0
E7EPI0;Q9P2D0	0.0277021	0.00157943	0.0172716	0.0176347	0.00688266	0.352373	0.203393	0.0340945	0.0287403	0.289273	0.00617221	0.0148832	0	0	0	0	0	0.416991	0.24069	0	0	0.342319	0	0
E7EPK1;E7ES33;Q16181;Q16181-2	0.0224103	0.006277	0.129833	0.148193	0.00955119	0.043321	0.0465569	0.056438	0.0075317	0.0141822	0.31228	0.203426	0	0	0.163573	0.186704	0	0	0	0	0	0	0.393433	0.256291
E7EPN9;Q9Y520;Q9Y520-4;Q9Y520-5;Q9Y520-6;Q9Y520-7	0.00764145	0.00146593	0.0774831	0.0875187	0.0484125	0.176612	0.477011	0.0965996	0.0038352	0.0143957	0.00402982	0.00499431	0	0	0.0804069	0.0908212	0.0502393	0.183277	0.495011	0.100245	0	0	0	0
E7EPP7;Q6ZWJ1	0.00506584	0.00441946	0.813684	0.00312115	0.00904531	0.00175977	0.00288829	0.00446951	0.0401591	0	0.111757	0.00363042	0	0	1	0	0	0	0	0	0	0	0	0
E7EPS8;P28827;P28827-2	0.0193232	0.00306245	0.0262774	0.114344	0.0690459	0.0347028	0.342499	0.218094	0.0593558	0.104126	0.00789997	0.00126962	0	0	0	0.126004	0.0760866	0	0.377424	0.240333	0.0654084	0.114744	0	0
E7EPT4;P19404	0.229481	0.416263	0.0203433	0.0345046	0.00517331	0.0120305	0.0780458	0.0505524	0.0718648	0.0329672	0.00772244	0.0410518	0.319786	0.580069	0	0	0	0	0	0	0.100145	0	0	0
E7EPX0;E7EVJ4;Q9NUL3;Q9NUL3-2;Q9NUL3-3;Q9NUL3-7;Q9NUL3-8	0.00240929	0.00136107	0.0187084	0.046511	0.0151805	0.673402	0.169757	0.0130701	0.0200942	0.0210002	0.0048577	0.0136479	0	0	0	0	0	1	0	0	0	0	0	0
E7EQ45;Q9H0R1	0.00384535	0.00161584	0.550675	0.095474	0.0125132	0.118924	0.0126512	0.0359382	0.0153625	0.006242	0.0539388	0.0928197	0	0	0.719768	0.124791	0	0.155442	0	0	0	0	0	0
E7EQ69;Q9GZZ1	0.00130565	0.00098812	0.140567	0.198017	0.0233306	0.0564468	0.00279249	0.00205953	0.00818008	0.00367885	0.443392	0.119243	0	0	0.179759	0.253226	0	0	0	0	0	0	0.567015	0
E7EQR4;P15311	0.00488828	0.0042064	0.00797473	0.00824617	0.00290912	0.00461141	0.00314729	0.00534962	0.0075922	0.00323655	0.914721	0.0331172	0	0	0	0	0	0	0	0	0	0	1	0
E7EQR8;Q9GZM5	0.01326	0.00265585	0.00728277	0.0527106	0.500076	0.0221393	0.270864	0.0747288	0.00371383	0.0490983	0.00151337	0.00195663	0	0	0	0	0.648657	0	0.351343	0	0	0	0	0
E7EQT4;Q9UKV3;S4R3H4	0.0362158	0.0742708	0.118859	0.00263744	0.00591588	0.00749948	0.0362724	0.108926	0.57196	0.00877336	0.010666	0.0180029	0	0.0849764	0.135992	0	0	0	0	0.124627	0.654405	0	0	0
E7EQU1;E7ES08;E9PES6;O15347	0.00331519	0.00420599	0.00762819	0.00866902	0.00324186	0.0793757	0.00302604	0.0045993	0.00891012	0.00322053	0.841821	0.0319867	0	0	0	0	0	0.0861658	0	0	0	0	0.913834	0
E7EQY1;Q96C01	0.0703526	0.770609	0.0572931	0.00381436	0.00262088	0.00292976	0.00238916	0.0158354	0.0528288	0.00777106	0.00649618	0.00706005	0	1	0	0	0	0	0	0	0	0	0	0
E7ER77;Q7Z2K6	0.0535352	0.00634405	0.0241021	0.01269	0.024744	0.019246	0.740048	0.0964334	0.00171664	0.0167499	0.00258951	0.00180091	0	0	0	0	0	0	0.884716	0.115284	0	0	0	0
E7ER86;E7ESA3;Q8WW35	0.00048721	0.0102083	0.0418776	0.026579	0.0969422	0.693168	0	0.000108608	0.0876444	0.000957127	0.00749671	0.0345313	0	0	0	0	0.110443	0.789706	0	0	0.0998507	0	0	0
E7ERI8;E7EW49;O75122-3	0.00510025	0.00207921	0.112276	0.216438	0.00463941	0.10299	0.00614195	0.0197223	0.00872052	0.00402626	0.328139	0.189727	0	0	0.118239	0.227932	0	0.108459	0	0	0	0	0.345566	0.199803
E7ERK9;Q9UI10;Q9UI10-2;Q9UI10-3	0.0019302	0.00420509	0.00949589	0.166548	0.00803757	0.76733	0.00627001	0.00162758	0.00627489	0.00511828	0.0057079	0.0174548	0	0	0	0.17834	0	0.82166	0	0	0	0	0	0
E7ERS3;Q86VM9	0.0163026	0.0325979	0.160417	0.0066031	0.0059415	0.00356157	0.00270131	0.0408288	0.600817	0.116706	0.00527541	0.00824751	0	0.0358007	0.176178	0	0	0	0	0	0.659848	0.128173	0	0
E7ERZ2;F8WDV1;Q9Y535;Q9Y535-2	0.00593139	0.0653409	0.00878201	0.00349842	0.00729975	0.00294763	0.00324447	0.0184024	0.835308	0.00571619	0.00666192	0.036867	0	0.0725487	0	0	0	0	0	0	0.927451	0	0	0
E7ES19;P35443	0.0085382	0.00391005	0.451146	0.00703267	0.0193409	0.0127602	0.0033102	0.0048863	0.105184	0.00752556	0.00953979	0.366827	0	0	0.488699	0	0	0	0	0	0.11394	0	0	0.397361
E7ES52;P46527	0.00748045	0.00454455	0.00576804	0.00485616	0.00583834	0.00272665	0.00277431	0.00444207	0.00551859	0.00166917	0.760068	0.194313	0	0	0	0	0	0	0	0	0	0	0.796399	0.203601
E7ES96;P49768;P49768-2	0.0203026	0.00666317	0.00877258	0.294022	0.130819	0.0363553	0.322958	0.108652	0.0120005	0.0524593	0.00424558	0.00274982	0	0	0	0.343303	0.152746	0	0.377088	0.126863	0	0	0	0
E7ESA6;H0YBP1;Q05397;Q05397-7	0.000203874	0.00210833	0.0410802	0.1716	0.00261856	0.210334	0.00268085	0.00238191	0.0209379	0.00173373	0.357457	0.186864	0	0	0	0.185262	0	0.22708	0	0	0	0	0.385916	0.201741
E7ESC6;Q9UIA9	0.00677893	0.00584094	0.0153249	0.00665745	0.00623417	0.00286997	0.00376269	0.00429054	0.00662794	0.00272635	0.350018	0.588868	0	0	0	0	0	0	0	0	0	0	0.372802	0.627198
E7ESK6;E9PBI9;P34741	0.0245467	0.0194195	0.0204939	0.00813912	0.0289567	0.00320915	0.537556	0.22597	0.110104	0.0171581	0.00238602	0.00206185	0	0	0	0	0	0	0.615313	0.258656	0.12603	0	0	0
E7ESL0;J3KQY1;Q9NWU5	0.202848	0.658289	0.00801189	0.0025076	0.00188186	0.00222789	0.0106469	0.00654892	0.01184	0.0837767	0.00515585	0.00626546	0.214674	0.696666	0	0	0	0	0	0	0	0.0886607	0	0
E7ESP9;P07197	0.00684494	0.0196223	0.0809024	0.225658	0.0147821	0.0544552	0.0102944	0.116846	0.0220161	0.0114949	0.012401	0.424683	0	0	0.0953938	0.266078	0	0	0	0.137776	0	0	0	0.500752
E7ESS3;K7EKW3;Q71RG4;Q71RG4-2	0.156634	0.152889	0.0509077	0.022041	0.0290534	0.123629	0.350013	0.0966363	0.00306752	0.00566059	0.0034446	0.00602326	0.178033	0.173777	0	0	0	0.140519	0.397832	0.109839	0	0	0	0
E7ESU0	0.00602703	0.00476721	0.00835495	0.00263652	0.00914068	0.00727921	0.000667404	0.00232089	0.042412	0.0015144	0.561424	0.353455	0	0	0	0	0	0	0	0	0	0	0.613659	0.386341
E7ESY4;Q13330;Q13330-3	0.0034083	0.00891271	0.444711	0.0109769	0.00563788	0.300887	0.00186303	0.00309898	0.206423	0.000415801	0.00691666	0.00674822	0	0	0.467123	0	0	0.316051	0	0	0.216826	0	0	0
E7ET40;P00749;P00749-2	0.00819079	0.0355166	0.0347253	0.00186894	0.076141	0.0064839	0.00388217	0.00499524	0.0454979	0.0121326	0.0316609	0.738905	0	0.0417566	0	0	0.0895184	0	0	0	0	0	0	0.868725
E7ET49;Q8NCG7	0.00179938	0.00281024	0.0121304	0.304257	0.0796744	0.514287	0.00951771	0.00441415	0.00411811	0.00416564	0.00803867	0.0547866	0	0	0	0.338734	0.0887026	0.572563	0	0	0	0	0	0
E7ETE2;P12081;P12081-4	0.00347304	0.00329864	0.00566399	0.0392612	0.00324862	0.00716904	0.00363395	0.00407489	0.0069885	0.00543659	0.772963	0.144788	0	0	0	0	0	0	0	0	0	0	0.842236	0.157764
E7ETP9;Q9UQV4	0.0375495	0.264828	0.0197395	0.00661442	0.0281149	0.0044451	0.142384	0.0436592	0.288402	0.154884	0.000938855	0.00844109	0	0.37399	0	0	0	0	0	0	0.407282	0.218727	0	0
E7ETU5;F6Y5H0;P29558;P29558-2	0.0186925	0.000941158	0.0576435	0.0375465	0.0169677	0.205391	0.279041	0.058183	0.00404627	0.145438	0.00823244	0.167877	0	0	0	0	0	0.257464	0.349787	0	0	0.182311	0	0.210438
E7ETU7;H0Y9G6;P09001	0.0517158	0.809501	0.00667223	0.00362352	0.00254658	0.0036942	0.00658327	0.00793258	0.00909014	0.0839156	0.00578057	0.00894488	0	0.906073	0	0	0	0	0	0	0	0.0939266	0	0
E7ETU9	0.216255	0.00825391	0.104025	0.00305551	0.156658	0.00341259	0.465806	0.0180761	0.00425344	0.0159059	0.000743331	0.00355524	0.229389	0	0.110343	0	0.166172	0	0.494096	0	0	0	0	0
E7ETZ4;Q9Y6E2	0.000163668	0.00311864	0.00812958	0.0455121	0.00343046	0.0761399	0.00257008	0.00100767	0.000871129	0.00240402	0.336363	0.52029	0	0	0	0	0	0.0816257	0	0	0	0	0.360597	0.557777
E7EU05;P16671;P16671-3	0.0614114	0.00552992	0.0122745	0.00653033	0.130931	0.00499171	0.464792	0.226915	0.0569063	0.0263684	0.00200766	0.00134139	0	0	0	0	0.148863	0	0.528447	0.257991	0.0646997	0	0	0
E7EUA0	0.00709584	0.00769372	0.0310639	0.0784621	0.198848	0.281283	0.0433317	0.0850905	0.0752557	0.0240613	0.00657909	0.161236	0	0	0	0.098684	0.250097	0.353777	0	0	0.0946512	0	0	0.202791
E7EUF1;Q13822;Q13822-2;Q13822-3	0.00265489	0.00701768	0.836741	0.00319223	0.0068519	0.00253857	0.00414628	0.00339791	0.12208	0	0.00643444	0.00494501	0	0	0.872677	0	0	0	0	0	0.127323	0	0	0
E7EUN9;Q9NX74	0.0110493	0.0382053	0.00863688	0.00447099	0.00332071	0.0051428	0.00258287	0.00784517	0.0101151	0.00356227	0.636436	0.268632	0	0.0405028	0	0	0	0	0	0	0	0	0.67471	0.284787
E7EUU4;Q04637-8	0.00327369	0.00185175	0.0904868	0.158635	0.0589865	0.440483	0.175284	0.0480975	0.00751162	0.00370449	0.00359124	0.00809467	0	0	0.120876	0.211911	0.0787966	0.588416	0	0	0	0	0	0
E7EV01;O15484	0.0485885	0.0158305	0.0296314	0.0195962	0.101704	0.00562567	0.434182	0.257544	0.0404825	0.0433273	0.00221644	0.00127224	0	0	0	0	0.128182	0	0.547222	0.324596	0	0	0	0
E7EVA0	0.00178253	0.004111	0.00988517	0.0891692	0.00429282	0.802671	0.00587496	0.00328144	0.00565323	0.00427543	0.0485834	0.0204198	0	0	0	0.0999834	0	0.900017	0	0	0	0	0	0
E7EVB6;O60941;O60941-6;O60941-7	0.007347	0.198161	0.00439326	0.0971234	0.249253	0.0395783	0.000528414	0.0345215	0.339504	0.0195055	0.00211104	0.00797337	0	0.224154	0	0.109863	0.281947	0	0	0	0.384036	0	0	0
E7EVC7;Q676U5;Q676U5-2	0.0684477	0.00502279	0.145146	0.172426	0.00789369	0.0477331	0.0498961	0.19689	0.0442146	0.0184364	0.150647	0.0932459	0	0	0.218229	0.259244	0	0	0	0.296027	0	0	0.2265	0
E7EVQ6;Q14534	0.0121332	0.0112959	0.0168613	0.0404958	0.0394568	0.0600444	0.53077	0.110424	0.0221845	0.0990758	0.0164969	0.0407622	0	0	0	0	0	0	0.716995	0.149167	0	0.133838	0	0
E7EVW7;P14317	0.00608234	0.00398334	0.00909441	0.00983195	0.00609011	0.00282921	0.00278834	0.024427	0.0201486	0.00756049	0.904927	0.00223716	0	0	0	0	0	0	0	0	0	0	1	0
E7EVX8;Q8WWY3	0.0263698	0.0208217	0.0431649	0.0127514	0.00461892	0.102246	0.00814679	0.0948849	0.519591	0.0821413	0.0449252	0.040338	0	0	0	0	0	0.12799	0	0.118775	0.650412	0.102823	0	0
E7EVZ1;Q86UP3;Q86UP3-2;Q86UP3-4;Q86UP3-5	0.15485	0.00284188	0.00559622	0.00236374	0.375677	0.00325755	0.304775	0.0268751	0.0572917	0.0574426	0.000863531	0.00816616	0.173483	0	0	0	0.420882	0	0.341449	0	0.0641857	0	0	0
E7EVZ5;Q8NBM8	0.154699	0.00463753	0.267254	0.000426977	0.120871	0.0586691	0.273654	0.045083	0.0662433	0.0052832	0.00181244	0.0013667	0.175253	0	0.302762	0	0.13693	0	0.310012	0	0.0750444	0	0	0
E7EW84;Q8TAG9;Q8TAG9-2	0.00597574	0.00777037	0.169753	0.173079	0.157447	0.00401049	0.00382799	0.0180345	0.00999577	0.00699585	0.0218536	0.421257	0	0	0.184207	0.187816	0.170852	0	0	0	0	0	0	0.457125
E7EWD6;Q76L83	0.00708938	0.16845	0.00533311	0.00551234	0.00801548	0.00317738	0.00474783	0.0129699	0.765323	0.00826273	0.00368263	0.00743698	0	0.180397	0	0	0	0	0	0	0.819603	0	0	0
[truncated: 6,565 more rows]

## Sheet: Legend
Name	Meaning
MainCompartment CCMPS	Compartment with highest Neural Network output
NN_Compartment	raw Neural Network output
[truncated: 1 more rows]
