# Supplementary material for: C-COMPASS: a user-friendly neural network tool profiles cell compartments at protein and lipid levels
Source: Nat Methods. 2025 Dec 4;23(1):118–30. doi: 10.1038/s41592-025-02880-3 (PMC12791020; doi:10.1038/s41592-025-02880-3)
Supplement: Supplementary file 5 — Prediction results for C-COMPASS and from original study by Mulvey et al. [file 41592_2025_2880_MOESM5_ESM.xlsx]

## Sheet: Predictions (ctrl)
Accession/UniprotID	Genes	MarkerCompartment	MainCompartment_Muley_et_al	MainCompartment_CCMPS
A0AVT1	UBA6		Cytosol	CYTOSOL
A0FGR8-2	ESYT2		Endoplasmic Reticulum	ENDOPLASMIC RETICULUM
A0JNW5	UHRF1BP1L		unknown	NUCLEUS
A0MZ66-3	SHTN1		Cytosol	CYTOSOL
A1L0T0	ILVBL		Endoplasmic Reticulum	ENDOPLASMIC RETICULUM
A1L170-2				PLASMA MEMBRANE
A1X283				CHROMATIN
A2RRP1	NBAS		Endoplasmic Reticulum	ENDOPLASMIC RETICULUM
A2RUS2	DENND3		Nucleus	NUCLEOLUS
A2VDJ0-5	KIAA0922		Endoplasmic Reticulum	ENDOPLASMIC RETICULUM
A3KMH1	VWA8	MITOCHONDRIA	Mitochondria	MITOCHONDRIA
A3KN83				CYTOSOL
A4D1E9	GTPBP10		Mitochondria	MITOCHONDRIA
A4D1P6	WDR91		Cytosol	CYTOSOL
A5YKK6	CNOT1		unknown	40S/60S RIBOSOME
A6NC98	CCDC88B		unknown	CYTOSOL
A6NDG6	PGP	CYTOSOL	Cytosol	CYTOSOL
A6NHR9	SMCHD1	CHROMATIN	Chromatin	CHROMATIN
A6NI72				NUCLEUS
A6NJ78	METTL15		Mitochondria	MITOCHONDRIA
A8MVS5	HIDE1		Plasma Membrane	PLASMA MEMBRANE
A8MVW0				PLASMA MEMBRANE
A8MXV4	NUDT19	PEROXISOME	Peroxisome	MITOCHONDRIA
B0I1T2	MYO1G	PLASMA MEMBRANE	Plasma Membrane	PLASMA MEMBRANE
B7ZBB8				CYTOSOL
C9JLW8	MCRIP1	NUCLEUS	Nucleus	CHROMATIN
E9PAV3				CYTOSOL
E9PRG8				NUCLEOLUS
F5H4A9				PLASMA MEMBRANE
H3BSY2				PLASMA MEMBRANE
O00115	DNASE2	LYSOSOME	Lysosome	LYSOSOME
O00116	AGPS	PEROXISOME	Peroxisome	PEROXISOME
O00124				ENDOPLASMIC RETICULUM
O00142	TK2		Mitochondria	MITOCHONDRIA
O00148	DDX39A		Nucleus	NUCLEUS
O00151	PDLIM1		unknown	PLASMA MEMBRANE
O00154-7				CYTOSOL
O00159-3	MYO1C		unknown	PLASMA MEMBRANE
O00160	MYO1F		unknown	CYTOSOL
O00161	SNAP23	PLASMA MEMBRANE	Plasma Membrane	PLASMA MEMBRANE
O00165-2	HAX1		Mitochondria	MITOCHONDRIA
O00170	AIP		Cytosol	CYTOSOL
O00178	GTPBP1		Nucleus	NUCLEUS
O00182	LGALS9		Plasma Membrane	PLASMA MEMBRANE
O00186	STXBP3		Lysosome	PLASMA MEMBRANE
O00193	SMAP		Cytosol	CYTOSOL
O00203	AP3B2		Cytosol	CYTOSOL
O00214-2	LGALS8		unknown	PLASMA MEMBRANE
O00217	NDUFS8		Mitochondria	MITOCHONDRIA
O00221				CYTOSOL
O00231-2	PSMD11		Cytosol	CYTOSOL
O00232	PSMD12		Cytosol	CYTOSOL
O00241	SIRPB1		Plasma Membrane	PLASMA MEMBRANE
O00264	PGRMC1	ENDOPLASMIC RETICULUM	Endoplasmic Reticulum	ENDOPLASMIC RETICULUM
O00291	HIP1		Lysosome	LYSOSOME
O00299	CLIC1		Cytosol	CYTOSOL
O00303	EIF3F		Cytosol	CYTOSOL
O00308	WWP2		Lysosome	PLASMA MEMBRANE
O00329	PIK3CD		unknown	NUCLEUS
O00330	PDHX	MITOCHONDRIA	Mitochondria	MITOCHONDRIA
O00391	QSOX1	GOLGI APPARATUS	Golgi Apparatus	GOLGI APPARATUS
O00399				CYTOSOL
O00400	SLC33A1	ENDOPLASMIC RETICULUM	Endoplasmic Reticulum	ENDOPLASMIC RETICULUM
O00410-3	IPO5		Cytosol	CYTOSOL
O00411	POLRMT	MITOCHONDRIA	Mitochondria	MITOCHONDRIA
O00422	SAP18		Nucleus	NUCLEUS
O00442-2	RTCA		Cytosol	CYTOSOL
O00443	PIK3C2A		unknown	GOLGI APPARATUS
O00461	GOLIM4	GOLGI APPARATUS	Golgi Apparatus	GOLGI APPARATUS
O00468	AGRN		unknown	GOLGI APPARATUS
O00471	EXOC5		unknown	PLASMA MEMBRANE
O00483	NDUFA4	MITOCHONDRIA	Mitochondria	MITOCHONDRIA
O00487	PSMD14		Cytosol	CYTOSOL
O00522	KRIT1		Plasma Membrane	PLASMA MEMBRANE
O00541	PES1.00	NUCLEUS	Nucleus	NUCLEUS
O00559-2	EBAG9	GOLGI APPARATUS	Golgi Apparatus	GOLGI APPARATUS
O00566	MPHOSPH10	NUCLEOLUS	Nucleolus	NUCLEOLUS
O00567	NOP56	NUCLEOLUS	Nucleolus	NUCLEOLUS
O00571	DDX3X		Nucleus	NUCLEOLUS
O00584	RNASET2		Lysosome	LYSOSOME
O00629				CYTOSOL
O00635				NUCLEUS
O00743-3	PPP6C		Cytosol	CYTOSOL
O00748	CES2		Endoplasmic Reticulum	ENDOPLASMIC RETICULUM
O00754	MAN2B1	LYSOSOME	Lysosome	LYSOSOME
O00762				CYTOSOL
O00764	PDXK		Cytosol	CYTOSOL
O00767	SCD		unknown	ENDOPLASMIC RETICULUM
O14497	ARID1A	CHROMATIN	Chromatin	CHROMATIN
O14523	C2CD2L		Endoplasmic Reticulum	ENDOPLASMIC RETICULUM
O14545	TRAFD1		Cytosol	CYTOSOL
O14578-4	CIT		unknown	PLASMA MEMBRANE
O14579	COPE		Cytosol	CYTOSOL
O14617-5	AP3D1		Cytosol	CYTOSOL
O14618				CYTOSOL
O14647	CHD2	CHROMATIN	Chromatin	CHROMATIN
O14653-2	GOSR2		unknown	GOLGI APPARATUS
O14656	TOR1A		Endoplasmic Reticulum	ENDOPLASMIC RETICULUM
O14657	TOR1B		Endoplasmic Reticulum	ENDOPLASMIC RETICULUM
O14672	ADAM10		unknown	PLASMA MEMBRANE
O14681	EI24		Endoplasmic Reticulum	ENDOPLASMIC RETICULUM
O14683	TP53I11		Endoplasmic Reticulum	LYSOSOME
O14732				CYTOSOL
O14734	ACOT8	PEROXISOME	Peroxisome	PEROXISOME
O14735	CDIPT		Endoplasmic Reticulum	ENDOPLASMIC RETICULUM
O14737	PDCD5		Cytosol	CYTOSOL
O14744	PRMT5		Cytosol	CYTOSOL
O14745	SLC9A3R1		unknown	PLASMA MEMBRANE
O14773	TPP1	LYSOSOME	Lysosome	LYSOSOME
O14776	TCERG1		unknown	CHROMATIN
O14777	NDC80		Chromatin	CHROMATIN
O14786				PLASMA MEMBRANE
O14787-2				CYTOSOL
O14818	PSMA7		Cytosol	CYTOSOL
O14841	OPLAH	CYTOSOL	Cytosol	CYTOSOL
O14867				CYTOSOL
O14874	BCKDK		Mitochondria	MITOCHONDRIA
O14879	IFIT3		Cytosol	CYTOSOL
O14880	MGST3	MITOCHONDRIA	Mitochondria	MITOCHONDRIA
O14908				PLASMA MEMBRANE
O14910	LIN7A		Lysosome	PLASMA MEMBRANE
O14920	IKBKB		Cytosol	CYTOSOL
O14925	TIMM23B		unknown	MITOCHONDRIA
O14933				CYTOSOL
O14949	UQCRQ	MITOCHONDRIA	Mitochondria	MITOCHONDRIA
O14950	MYL12B		unknown	CYTOSOL
O14964	HGS		Cytosol	CYTOSOL
O14966	RAB29		Endoplasmic Reticulum	ENDOPLASMIC RETICULUM
O14967	CLGN		unknown	GOLGI APPARATUS
O14972	DSCR3		Lysosome	LYSOSOME
O14975	SLC27A2		unknown	ENDOPLASMIC RETICULUM
O14976	GAK		unknown	CYTOSOL
O14980	XPO1		Cytosol	NUCLEUS
O14981				CHROMATIN
O14994	SYN3		unknown	PLASMA MEMBRANE
O15014				CHROMATIN
O15027-5	SEC16A		unknown	NUCLEUS
O15031	PLXNB2	PLASMA MEMBRANE	Plasma Membrane	PLASMA MEMBRANE
O15042				NUCLEUS
O15056				CHROMATIN
O15085-2				PLASMA MEMBRANE
O15091	KIAA0391	MITOCHONDRIA	Mitochondria	MITOCHONDRIA
O15118	NPC1	LYSOSOME	Lysosome	LYSOSOME
O15120	AGPAT2	ENDOPLASMIC RETICULUM	Endoplasmic Reticulum	ENDOPLASMIC RETICULUM
O15121	DEGS1		Endoplasmic Reticulum	ENDOPLASMIC RETICULUM
O15126	SCAMP1		Lysosome	PLASMA MEMBRANE
O15127	SCAMP2		Plasma Membrane	PLASMA MEMBRANE
O15143	ARPC1B		unknown	NUCLEUS
O15144	ARPC2		unknown	CYTOSOL
O15145	ARPC3		unknown	NUCLEUS
O15160	POLR1C	NUCLEUS	Nucleus	NUCLEUS
O15173-2	PGRMC2		Endoplasmic Reticulum	ENDOPLASMIC RETICULUM
O15212				CYTOSOL
O15226-2	NKRF	NUCLEOLUS	Nucleolus	NUCLEOLUS
O15228	GNPAT	PEROXISOME	Peroxisome	PEROXISOME
O15254	ACOX3	PEROXISOME	Peroxisome	PEROXISOME
O15260	SURF4		unknown	ENDOPLASMIC RETICULUM
O15269	SPTLC1	ENDOPLASMIC RETICULUM	Endoplasmic Reticulum	ENDOPLASMIC RETICULUM
O15270	SPTLC2	ENDOPLASMIC RETICULUM	Endoplasmic Reticulum	ENDOPLASMIC RETICULUM
O15294	OGT		Nucleus	NUCLEUS
O15320-8				ENDOPLASMIC RETICULUM
O15321	TM9SF1		Golgi Apparatus	GOLGI APPARATUS
O15347	HMGB3	CHROMATIN	Chromatin	CHROMATIN
O15355	PPM1G		Cytosol	CYTOSOL
O15357	INPPL1		unknown	NUCLEUS
O15371	EIF3D		unknown	CYTOSOL
O15372	EIF3H		unknown	NUCLEUS
O15382	BCAT2	MITOCHONDRIA	Mitochondria	MITOCHONDRIA
O15394	NCAM2	PLASMA MEMBRANE	Plasma Membrane	PLASMA MEMBRANE
O15400	STX7		Lysosome	LYSOSOME
O15427	SLC16A3		Lysosome	PLASMA MEMBRANE
O15439	ABCC4		unknown	LYSOSOME
O15446-2	CD3EAP	CHROMATIN	Chromatin	CHROMATIN
O15460				ENDOPLASMIC RETICULUM
O15479	MAGEB2		Nucleus	40S/60S RIBOSOME
O15511	ARPC5		Cytosol	CYTOSOL
O15523	DDX3Y		Nucleus	NUCLEOLUS
O15530				CYTOSOL
O15533-3	TAPBP		Endoplasmic Reticulum	ENDOPLASMIC RETICULUM
O15553	MEFV		unknown	CHROMATIN
O43143	DHX15	NUCLEUS	Nucleus	NUCLEUS
O43169	CYB5B		Endoplasmic Reticulum	ENDOPLASMIC RETICULUM
O43175	PHGDH		Cytosol	CYTOSOL
O43181	NDUFS4		Mitochondria	MITOCHONDRIA
O43237	DYNC1LI2		Chromatin	CHROMATIN
O43242	PSMD3		Cytosol	CYTOSOL
O43264	ZW10		unknown	ENDOPLASMIC RETICULUM
O43278				PLASMA MEMBRANE
O43290	SART1		Nucleus	NUCLEOLUS
O43292	GPAA1	ENDOPLASMIC RETICULUM	Endoplasmic Reticulum	ENDOPLASMIC RETICULUM
O43293	DAPK3		Nucleus	40S/60S RIBOSOME
O43303				NUCLEOLUS
O43314	PPIP5K2		Chromatin	CHROMATIN
O43318-2				CYTOSOL
O43390	HNRNPR	NUCLEUS	Nucleus	NUCLEUS
O43395	PRPF3	NUCLEUS	Nucleus	NUCLEUS
O43396	TXNL1		Cytosol	CYTOSOL
O43399-7	TPD52L2		Cytosol	CYTOSOL
O43402	EMC8		Endoplasmic Reticulum	ENDOPLASMIC RETICULUM
O43427	FIBP		unknown	CYTOSOL
O43432-3	EIF4G3		Nucleus	NUCLEUS
O43447	PPIH		Cytosol	CYTOSOL
O43464	HTRA2		Mitochondria	MITOCHONDRIA
O43488	AKR7A2		unknown	CYTOSOL
O43491	EPB41L2		Plasma Membrane	PLASMA MEMBRANE
O43493	TGOLN2		unknown	LYSOSOME
O43504	LAMTOR5		Lysosome	LYSOSOME
O43516	WIPF1		Chromatin	PLASMA MEMBRANE
O43566	RGS14		unknown	PLASMA MEMBRANE
O43583	DENR		Nucleus	NUCLEUS
O43586	PSTPIP1		unknown	GOLGI APPARATUS
O43597				PLASMA MEMBRANE
O43598				CYTOSOL
O43615	TIMM44	MITOCHONDRIA	Mitochondria	MITOCHONDRIA
O43617	TRAPPC3		unknown	CYTOSOL
O43633	CHMP2A		unknown	CYTOSOL
O43639	NCK2		unknown	PLASMA MEMBRANE
O43660	PLRG1	NUCLEUS	Nucleus	NUCLEUS
O43663-4				CHROMATIN
O43665-3				CYTOSOL
O43670-4	ZNF207		Nucleus	NUCLEUS
O43674	NDUFB5		Mitochondria	MITOCHONDRIA
O43676	NDUFB3		Mitochondria	MITOCHONDRIA
O43678	NDUFA2		Mitochondria	MITOCHONDRIA
O43684-2	BUB3	NUCLEUS	Nucleus	NUCLEUS
O43707	ACTN4		Cytosol	CYTOSOL
O43708	GSTZ1		unknown	CYTOSOL
O43709				NUCLEUS
O43715	TRIAP1		Mitochondria	MITOCHONDRIA
O43716	GATC	MITOCHONDRIA	Mitochondria	MITOCHONDRIA
O43719	HTATSF1		Cytosol	NUCLEUS
O43747	AP1G1		Cytosol	CYTOSOL
O43760-2	SYNGR2		Lysosome	LYSOSOME
O43765				CYTOSOL
O43768	ENSA		Cytosol	CYTOSOL
O43776	NARS		Cytosol	CYTOSOL
O43809	NUDT21		Nucleus	NUCLEUS
O43813	LANCL1		unknown	NUCLEUS
O43815	STRN		unknown	CYTOSOL
O43818	RRP9	NUCLEOLUS	Nucleolus	NUCLEOLUS
O43819	SCO2		Mitochondria	MITOCHONDRIA
O43824	GTPBP6		Mitochondria	MITOCHONDRIA
O43837	IDH3B	MITOCHONDRIA	Mitochondria	MITOCHONDRIA
O43847-2	NRDC		Cytosol	CYTOSOL
O43852-3	CALU		unknown	ENDOPLASMIC RETICULUM
O43861	ATP9B		Lysosome	LYSOSOME
O43865	AHCYL1		unknown	CYTOSOL
O43914	TYROBP		unknown	PLASMA MEMBRANE
O43920	NDUFS5		Mitochondria	MITOCHONDRIA
O60216	RAD21	CHROMATIN	Chromatin	CHROMATIN
O60220	TIMM8A		Mitochondria	MITOCHONDRIA
O60231				NUCLEUS
O60234	GMFG		Cytosol	CYTOSOL
O60262	GNG7		unknown	PLASMA MEMBRANE
O60264	SMARCA5	CHROMATIN	Chromatin	CHROMATIN
O60271	SPAG9		Cytosol	CYTOSOL
O60306	AQR	NUCLEUS	Nucleus	NUCLEUS
O60307				PLASMA MEMBRANE
O60313-2	OPA1	MITOCHONDRIA	Mitochondria	MITOCHONDRIA
O60315	ZEB2	CHROMATIN	Chromatin	CHROMATIN
O60331-3	PIP5K1C		Plasma Membrane	PLASMA MEMBRANE
O60337	MARCH6		Endoplasmic Reticulum	ENDOPLASMIC RETICULUM
O60341	KDM1A		Nucleus	NUCLEUS
O60353	FZD6	PLASMA MEMBRANE	Plasma Membrane	PLASMA MEMBRANE
O60427	FADS1		Endoplasmic Reticulum	ENDOPLASMIC RETICULUM
O60476	MAN1A2	GOLGI APPARATUS	Golgi Apparatus	GOLGI APPARATUS
O60488	ACSL4		unknown	GOLGI APPARATUS
O60493	SNX3		Cytosol	CYTOSOL
O60496	DOK2		unknown	CYTOSOL
O60503	ADCY9	PLASMA MEMBRANE	Plasma Membrane	PLASMA MEMBRANE
O60504	SORBS3		Chromatin	GOLGI APPARATUS
O60506-4				CYTOSOL
O60524	NEMF		Nucleus	CYTOSOL
O60568	PLOD3	ENDOPLASMIC RETICULUM	Endoplasmic Reticulum	ENDOPLASMIC RETICULUM
O60573	EIF4E2		Cytosol	NUCLEUS
O60603	TLR2		Lysosome	PLASMA MEMBRANE
O60610	DIAPH1		Cytosol	CYTOSOL
O60613	2015-09-01		unknown	ENDOPLASMIC RETICULUM
O60645-3	EXOC3	GOLGI APPARATUS	Golgi Apparatus	PLASMA MEMBRANE
O60664	PLIN3		Cytosol	CYTOSOL
O60669	SLC16A7	PLASMA MEMBRANE	Plasma Membrane	PLASMA MEMBRANE
O60678				CYTOSOL
O60701	UGDH		Cytosol	CYTOSOL
O60704	TPST2	GOLGI APPARATUS	Golgi Apparatus	GOLGI APPARATUS
O60716				PLASMA MEMBRANE
O60762	DPM1		Endoplasmic Reticulum	ENDOPLASMIC RETICULUM
O60763	USO1		Cytosol	CYTOSOL
O60783	MRPS14		Mitochondria	MITOCHONDRIA
O60784-2	TOM1		unknown	PLASMA MEMBRANE
O60826	CCDC22		Lysosome	LYSOSOME
O60828				NUCLEOLUS
O60830-2	TIMM17B		Mitochondria	MITOCHONDRIA
O60832	DKC1	NUCLEOLUS	Nucleolus	NUCLEOLUS
O60841	EIF5B		Cytosol	CYTOSOL
O60858-3	TRIM13		unknown	GOLGI APPARATUS
O60861	GAS7		Plasma Membrane	PLASMA MEMBRANE
O60869	EDF1		unknown	40S/60S RIBOSOME
O60870				NUCLEOLUS
O60879-2	DIAPH2		unknown	CHROMATIN
O60884	DNAJA2		Cytosol	CYTOSOL
O60885	BRD4	CHROMATIN	Chromatin	CHROMATIN
O60925	PFDN1		Cytosol	CYTOSOL
O60934	NBN	CHROMATIN	Chromatin	CHROMATIN
O60942	RNGTT	NUCLEUS	Nucleus	NUCLEUS
O75027-2	ABCB7	MITOCHONDRIA	Mitochondria	MITOCHONDRIA
O75044	SRGAP2C		unknown	PLASMA MEMBRANE
O75052	NOS1AP		Lysosome	PLASMA MEMBRANE
O75063	FAM20B	GOLGI APPARATUS	Golgi Apparatus	GOLGI APPARATUS
O75064	DENND4B		Chromatin	PLASMA MEMBRANE
O75071	EFCAB14		unknown	LYSOSOME
O75083	WDR1		Cytosol	CYTOSOL
O75116	ROCK2		unknown	PLASMA MEMBRANE
O75127	PTCD1		Mitochondria	MITOCHONDRIA
O75131	CPNE3		Cytosol	CYTOSOL
O75144-2	ICOSLG		unknown	PLASMA MEMBRANE
O75150	RNF40	NUCLEUS	Nucleus	NUCLEOLUS
O75152	ZC3H11A	NUCLEUS	Nucleus	NUCLEOLUS
O75153	CLUH		unknown	CYTOSOL
O75164	KDM4A		Cytosol	CYTOSOL
O75165	DNAJC13		Lysosome	LYSOSOME
O75167-4				CYTOSOL
O75175	CNOT3		unknown	40S/60S RIBOSOME
O75179				NUCLEOLUS
O75208	COQ9	MITOCHONDRIA	Mitochondria	MITOCHONDRIA
O75251	NDUFS7		Mitochondria	MITOCHONDRIA
O75298	RTN2		unknown	GOLGI APPARATUS
O75306	NDUFS2	MITOCHONDRIA	Mitochondria	MITOCHONDRIA
O75312				CYTOSOL
O75323	GBAS		Mitochondria	MITOCHONDRIA
O75330-3	HMMR		unknown	CHROMATIN
O75340				CYTOSOL
O75347	TBCA		Cytosol	CYTOSOL
O75348	ATP6V1G1		unknown	PLASMA MEMBRANE
O75351	VPS4B		Cytosol	CYTOSOL
O75362				CHROMATIN
O75367	H2AFY	CHROMATIN	Chromatin	CHROMATIN
O75368	SH3BGRL		Cytosol	CYTOSOL
O75369-8	FLNB		Cytosol	CYTOSOL
O75379	VAMP4		Lysosome	PLASMA MEMBRANE
O75380	NDUFS6	MITOCHONDRIA	Mitochondria	MITOCHONDRIA
O75381	PEX14	PEROXISOME	Peroxisome	PEROXISOME
O75387-2				PLASMA MEMBRANE
O75390	CS	MITOCHONDRIA	Mitochondria	MITOCHONDRIA
O75394	MRPL33		Mitochondria	MITOCHONDRIA
O75396	SEC22B		Endoplasmic Reticulum	ENDOPLASMIC RETICULUM
O75400	PRPF40A	NUCLEUS	Nucleus	NUCLEUS
O75410-2	TACC1		unknown	CYTOSOL
O75427	LRCH4		Plasma Membrane	PLASMA MEMBRANE
O75436	VPS26A		Cytosol	CYTOSOL
O75438				MITOCHONDRIA
O75439	PMPCB	MITOCHONDRIA	Mitochondria	MITOCHONDRIA
O75446				CHROMATIN
O75449				NUCLEUS
O75475	PSIP1	CHROMATIN	Chromatin	CHROMATIN
O75477	ERLIN1	ENDOPLASMIC RETICULUM	Endoplasmic Reticulum	ENDOPLASMIC RETICULUM
O75489	NDUFS3	MITOCHONDRIA	Mitochondria	MITOCHONDRIA
O75521	ECI2		Mitochondria	PEROXISOME
O75531	BANF1		unknown	NUCLEUS
O75533	SF3B1	NUCLEUS	Nucleus	NUCLEUS
O75534-4	CSDE1		Cytosol	CYTOSOL
O75592				NUCLEOLUS
O75608	LYPLA1		unknown	CYTOSOL
O75616	ERAL1		Mitochondria	MITOCHONDRIA
O75643	SNRNP200	NUCLEUS	Nucleus	NUCLEUS
O75663				CYTOSOL
O75676				NUCLEUS
O75683				NUCLEOLUS
O75689	ADAP1		unknown	PLASMA MEMBRANE
O75694	NUP155	NUCLEUS	Nucleus	NUCLEUS
O75695	RP2	PLASMA MEMBRANE	Plasma Membrane	PLASMA MEMBRANE
O75717				CYTOSOL
O75718	CRTAP		Endoplasmic Reticulum	ENDOPLASMIC RETICULUM
O75746	SLC25A12		Mitochondria	MITOCHONDRIA
O75781	PALM		Plasma Membrane	PLASMA MEMBRANE
O75787	ATP6AP2		Endoplasmic Reticulum	ENDOPLASMIC RETICULUM
O75792				NUCLEUS
O75817				NUCLEOLUS
O75821	EIF3G		Cytosol	CYTOSOL
O75822	EIF3J		Cytosol	CYTOSOL
O75832	PSMD10		Cytosol	CYTOSOL
O75843	AP1G2		unknown	CYTOSOL
O75844	ZMPSTE24		Endoplasmic Reticulum	ENDOPLASMIC RETICULUM
O75845	SC5D		Endoplasmic Reticulum	ENDOPLASMIC RETICULUM
O75874	IDH1		Cytosol	CYTOSOL
O75879	GATB		Mitochondria	MITOCHONDRIA
O75880	SCO1	MITOCHONDRIA	Mitochondria	MITOCHONDRIA
O75882	ATRN		Lysosome	PLASMA MEMBRANE
O75915	ARL6IP5		Endoplasmic Reticulum	ENDOPLASMIC RETICULUM
O75934	BCAS2	NUCLEUS	Nucleus	NUCLEUS
O75937	DNAJC8		Nucleus	NUCLEUS
O75940	SMNDC1		unknown	NUCLEUS
O75947	ATP5H	MITOCHONDRIA	Mitochondria	MITOCHONDRIA
O75955	FLOT1		Lysosome	LYSOSOME
O75964	ATP5L	MITOCHONDRIA	Mitochondria	MITOCHONDRIA
O75976	CPD		Lysosome	PLASMA MEMBRANE
O76021	RSL1D1	NUCLEOLUS	Nucleolus	NUCLEOLUS
O76031	CLPX	MITOCHONDRIA	Mitochondria	MITOCHONDRIA
O76071	CIAO1		Cytosol	CYTOSOL
O76094	SRP72		Nucleus	NUCLEUS
O76096				LYSOSOME
O94759	TRPM2		Endoplasmic Reticulum	LYSOSOME
O94766	B3GAT3	GOLGI APPARATUS	Golgi Apparatus	GOLGI APPARATUS
O94776	MTA2	NUCLEUS	Nucleus	NUCLEUS
O94804	STK10		unknown	PLASMA MEMBRANE
O94819	KBTBD11		Nucleus	NUCLEUS
O94826	TOMM70		Mitochondria	MITOCHONDRIA
O94851-4	MICAL2		Endoplasmic Reticulum	ENDOPLASMIC RETICULUM
O94855-2	SEC24D		unknown	NUCLEUS
O94874	UFL1		Endoplasmic Reticulum	ENDOPLASMIC RETICULUM
O94885	SASH1		unknown	PLASMA MEMBRANE
O94886	TMEM63A		Lysosome	PLASMA MEMBRANE
O94903	PROSC		Cytosol	CYTOSOL
O94905	ERLIN2	ENDOPLASMIC RETICULUM	Endoplasmic Reticulum	ENDOPLASMIC RETICULUM
O94906	PRPF6		Nucleus	NUCLEUS
O94915	FRYL		unknown	CYTOSOL
O94919	ENDOD1		Endoplasmic Reticulum	LYSOSOME
O94925-3	GLS		Mitochondria	MITOCHONDRIA
O94927				NUCLEUS
O94966-5	USP19		unknown	CYTOSOL
O94979				NUCLEUS
O94986				CHROMATIN
O95104	SCAF4	NUCLEUS	Nucleus	NUCLEUS
O95139	NDUFB6		Mitochondria	MITOCHONDRIA
O95140	MFN2		Mitochondria	MITOCHONDRIA
O95159	ZFPL1	GOLGI APPARATUS	Golgi Apparatus	GOLGI APPARATUS
O95163	IKBKAP		Cytosol	CYTOSOL
O95168	NDUFB4		Mitochondria	MITOCHONDRIA
O95169	NDUFB8	MITOCHONDRIA	Mitochondria	MITOCHONDRIA
O95182	NDUFA7		Mitochondria	MITOCHONDRIA
O95202	LETM1	MITOCHONDRIA	Mitochondria	MITOCHONDRIA
O95210	STBD1		Endoplasmic Reticulum	ENDOPLASMIC RETICULUM
O95219				CYTOSOL
O95232	LUC7L3		unknown	NUCLEUS
O95239	KIF4B	CHROMATIN	Chromatin	CHROMATIN
O95248-4	SBF1		unknown	GOLGI APPARATUS
O95249	GOSR1	GOLGI APPARATUS	Golgi Apparatus	GOLGI APPARATUS
O95251				CHROMATIN
O95292	VAPB	ENDOPLASMIC RETICULUM	Endoplasmic Reticulum	ENDOPLASMIC RETICULUM
O95298	NDUFC2-KCTD14		Mitochondria	MITOCHONDRIA
O95299	NDUFA10	MITOCHONDRIA	Mitochondria	MITOCHONDRIA
O95302				ENDOPLASMIC RETICULUM
O95319-3				NUCLEUS
O95336	PGLS	CYTOSOL	Cytosol	CYTOSOL
O95347	SMC2	CHROMATIN	Chromatin	CHROMATIN
O95352				CYTOSOL
O95372	LYPLA2		Cytosol	CYTOSOL
O95373	IPO7		Cytosol	CYTOSOL
O95400	CD2BP2		Nucleus	NUCLEUS
O95429				CYTOSOL
O95433	AHSA1		Cytosol	CYTOSOL
O95450	ADAMTS2		Lysosome	GOLGI APPARATUS
O95456				CYTOSOL
O95466-3				CYTOSOL
O95477	ABCA1		Lysosome	PLASMA MEMBRANE
O95479	H6PD		Endoplasmic Reticulum	ENDOPLASMIC RETICULUM
O95486	SEC24A		unknown	CYTOSOL
O95487-3	SEC24B		unknown	GOLGI APPARATUS
O95571	ETHE1		Mitochondria	MITOCHONDRIA
O95573	ACSL3		Endoplasmic Reticulum	ENDOPLASMIC RETICULUM
O95602	POLR1A		unknown	CHROMATIN
O95613	PCNT		Chromatin	CHROMATIN
O95619				CHROMATIN
O95684-2				NUCLEUS
O95714	HERC2		unknown	ENDOPLASMIC RETICULUM
O95716	RAB3D		unknown	ENDOPLASMIC RETICULUM
O95721	SNAP29		unknown	LYSOSOME
O95747	OXSR1		Cytosol	CYTOSOL
O95757	HSPA4L		Cytosol	CYTOSOL
O95758-4	PTBP3		Nucleus	NUCLEUS
O95772				PLASMA MEMBRANE
O95782	AP2A1		Lysosome	LYSOSOME
O95793	STAU1		40S/60S Ribosome	40S/60S RIBOSOME
O95816	BAG2		unknown	CYTOSOL
O95817	BAG3		unknown	PLASMA MEMBRANE
O95819-3	MAP4K4		Plasma Membrane	PLASMA MEMBRANE
O95822	MLYCD		Mitochondria	MITOCHONDRIA
O95825	CRYZL1		Nucleus	NUCLEUS
O95831	AIFM1		Mitochondria	MITOCHONDRIA
O95861	BPNT1		Cytosol	CYTOSOL
O95864	FADS2		Endoplasmic Reticulum	ENDOPLASMIC RETICULUM
O95865	DDAH2		unknown	PLASMA MEMBRANE
O95870	ABHD16A		Endoplasmic Reticulum	ENDOPLASMIC RETICULUM
O95881	TXNDC12		Endoplasmic Reticulum	ENDOPLASMIC RETICULUM
O95900	TRUB2		Peroxisome	MITOCHONDRIA
O95980	RECK	PLASMA MEMBRANE	Plasma Membrane	PLASMA MEMBRANE
O96000	NDUFB10		Mitochondria	MITOCHONDRIA
O96005	CLPTM1		Endoplasmic Reticulum	ENDOPLASMIC RETICULUM
O96008	TOMM40	MITOCHONDRIA	Mitochondria	MITOCHONDRIA
O96011	PEX11B	PEROXISOME	Peroxisome	PEROXISOME
O96013	PAK4		unknown	PLASMA MEMBRANE
O96019	ACTL6A		Nucleus	NUCLEUS
P00167	CYB5A		Endoplasmic Reticulum	ENDOPLASMIC RETICULUM
P00338-3	LDHA		Cytosol	CYTOSOL
P00367	GLUD1	MITOCHONDRIA	Mitochondria	MITOCHONDRIA
P00387-3	CYB5R3		Endoplasmic Reticulum	ENDOPLASMIC RETICULUM
P00390				NUCLEUS
P00403				MITOCHONDRIA
P00441	SOD1		Cytosol	CYTOSOL
P00491	PNP		Cytosol	CYTOSOL
P00492	HPRT1	CYTOSOL	Cytosol	CYTOSOL
P00505	GOT2	MITOCHONDRIA	Mitochondria	MITOCHONDRIA
P00519-2	ABL1		unknown	PLASMA MEMBRANE
P00558	PGK1.00		unknown	PLASMA MEMBRANE
P00746	CFD		Plasma Membrane	PLASMA MEMBRANE
P00747	PLG		unknown	CHROMATIN
P00749	PLAU		unknown	PLASMA MEMBRANE
P00846	MT-ATP6		unknown	MITOCHONDRIA
P00918	CA2		Cytosol	CYTOSOL
P00966	ASS1		Cytosol	CYTOSOL
P00973	OAS1		unknown	ENDOPLASMIC RETICULUM
P01019				GOLGI APPARATUS
P01034	CST3		unknown	LYSOSOME
P01111	NRAS		unknown	PLASMA MEMBRANE
P01112	HRAS		Plasma Membrane	PLASMA MEMBRANE
P01116-2				PLASMA MEMBRANE
P01130	LDLR		Lysosome	LYSOSOME
P01137	TGFB1		Endoplasmic Reticulum	ENDOPLASMIC RETICULUM
P01892	HLA-A	PLASMA MEMBRANE	Plasma Membrane	PLASMA MEMBRANE
P02042	HBD		unknown	CHROMATIN
P02545	LMNA		Chromatin	CHROMATIN
P02649	APOE		unknown	GOLGI APPARATUS
P02655	APOC2		unknown	MITOCHONDRIA
P02686	MBP		Plasma Membrane	PLASMA MEMBRANE
P02765	AHSG		unknown	NUCLEUS
P02786	TFRC		Lysosome	LYSOSOME
P02788				PLASMA MEMBRANE
P02792	FTL		unknown	LYSOSOME
P02794	FTH1		unknown	LYSOSOME
P03973				PLASMA MEMBRANE
P04035-3	HMGCR		Endoplasmic Reticulum	ENDOPLASMIC RETICULUM
P04040	CAT		unknown	40S/60S RIBOSOME
P04049				CYTOSOL
P04062	GBA	LYSOSOME	Lysosome	LYSOSOME
P04075	ALDOA		unknown	CYTOSOL
P04080	CSTB		Cytosol	CYTOSOL
P04083	ANXA1		Cytosol	CYTOSOL
P04179	SOD2		unknown	MITOCHONDRIA
P04181	OAT	MITOCHONDRIA	Mitochondria	MITOCHONDRIA
P04183	TK1		unknown	CYTOSOL
P04406	GAPDH		unknown	NUCLEUS
P04632	CAPNS1		Cytosol	CYTOSOL
P04792	HSPB1		Cytosol	CYTOSOL
P04818	TYMS		unknown	CYTOSOL
P04839	CYBB		Lysosome	PLASMA MEMBRANE
P04843	RPN1	ENDOPLASMIC RETICULUM	Endoplasmic Reticulum	ENDOPLASMIC RETICULUM
P04899-3	GNAI2		Plasma Membrane	PLASMA MEMBRANE
P04920	SLC4A2		unknown	PLASMA MEMBRANE
P04921	GYPC	PLASMA MEMBRANE	Plasma Membrane	PLASMA MEMBRANE
P05023	ATP1A2	PLASMA MEMBRANE	Plasma Membrane	PLASMA MEMBRANE
P05067	APP		Lysosome	GOLGI APPARATUS
P05091	ALDH2	MITOCHONDRIA	Mitochondria	MITOCHONDRIA
P05107	ITGB2		unknown	ENDOPLASMIC RETICULUM
P05114	HMGN1	CHROMATIN	Chromatin	CHROMATIN
P05141	SLC25A5		Mitochondria	MITOCHONDRIA
P05161	ISG15		unknown	CYTOSOL
P05165	PCCA	MITOCHONDRIA	Mitochondria	MITOCHONDRIA
P05166-2	PCCB	MITOCHONDRIA	Mitochondria	MITOCHONDRIA
P05198	EIF2S1		Nucleus	NUCLEUS
P05204	HMGN2	CHROMATIN	Chromatin	CHROMATIN
P05362	ICAM1	PLASMA MEMBRANE	Plasma Membrane	PLASMA MEMBRANE
P05387	RPLP2	40S/60S RIBOSOME	40S/60S Ribosome	NUCLEUS
P05388	RPLP0	40S/60S RIBOSOME	40S/60S Ribosome	40S/60S RIBOSOME
P05455	SSB		Cytosol	CYTOSOL
P05556	ITGB1	PLASMA MEMBRANE	Plasma Membrane	PLASMA MEMBRANE
P05771-2	PRKCB		Cytosol	CYTOSOL
P06132				CYTOSOL
P06213-2				PLASMA MEMBRANE
P06241-2				PLASMA MEMBRANE
P06280	GLA	LYSOSOME	Lysosome	LYSOSOME
P06396	GSN		Plasma Membrane	PLASMA MEMBRANE
P06396-2				CYTOSOL
P06400	RB1		unknown	CHROMATIN
P06454	PTMA		Cytosol	CYTOSOL
P06493	CDK1		Nucleus	NUCLEUS
P06576	ATP5B	MITOCHONDRIA	Mitochondria	MITOCHONDRIA
P06702	S100A9		Cytosol	CYTOSOL
P06703				CYTOSOL
P06733	ENO1		Cytosol	CYTOSOL
P06734				PLASMA MEMBRANE
P06737	PYGL		Cytosol	CYTOSOL
P06744	GPI		Cytosol	CYTOSOL
P06753	TPM3		Cytosol	CYTOSOL
P06753-2	TPM3		Cytosol	CYTOSOL
P06756	ITGAV	PLASMA MEMBRANE	Plasma Membrane	PLASMA MEMBRANE
P06865	HEXA	LYSOSOME	Lysosome	LYSOSOME
P07099	EPHX1		Endoplasmic Reticulum	ENDOPLASMIC RETICULUM
P07195	LDHB	CYTOSOL	Cytosol	CYTOSOL
P07203	GPX1		Cytosol	NUCLEUS
P07204	THBD		Plasma Membrane	PLASMA MEMBRANE
P07225	PROS1		Endoplasmic Reticulum	ENDOPLASMIC RETICULUM
P07237	P4HB		Endoplasmic Reticulum	ENDOPLASMIC RETICULUM
P07305	H1F0	CHROMATIN	Chromatin	CHROMATIN
P07332	FES		Chromatin	CHROMATIN
P07333	CSF1R	PLASMA MEMBRANE	Plasma Membrane	PLASMA MEMBRANE
P07339	CTSD	LYSOSOME	Lysosome	LYSOSOME
P07355-2	ANXA2P2		unknown	PLASMA MEMBRANE
P07384	CAPN1		Cytosol	CYTOSOL
P07437	TUBB		Cytosol	CYTOSOL
P07477				PLASMA MEMBRANE
P07602-3	PSAP	LYSOSOME	Lysosome	LYSOSOME
P07686	HEXB	LYSOSOME	Lysosome	LYSOSOME
P07711	CTSL	LYSOSOME	Lysosome	LYSOSOME
P07737	PFN1		Cytosol	CYTOSOL
P07741	APRT		Cytosol	CYTOSOL
P07814	EPRS		Cytosol	CYTOSOL
P07858	CTSB	LYSOSOME	Lysosome	LYSOSOME
P07900-2	HSP90AA1		Cytosol	CYTOSOL
P07902	GALT		Cytosol	CYTOSOL
P07910-2	HNRNPC	NUCLEUS	Nucleus	NUCLEOLUS
P07919	UQCRH	MITOCHONDRIA	Mitochondria	MITOCHONDRIA
P07947	YES1		Plasma Membrane	PLASMA MEMBRANE
P07948				PLASMA MEMBRANE
P07954-2				MITOCHONDRIA
P07996	THBS1		Lysosome	PLASMA MEMBRANE
P08133	ANXA6		Cytosol	CYTOSOL
P08134	RHOC		unknown	CYTOSOL
P08174-2	CD55		unknown	PLASMA MEMBRANE
P08195-2	SLC3A2		Lysosome	PLASMA MEMBRANE
P08236	GUSB	LYSOSOME	Lysosome	LYSOSOME
P08238	HSP90AB1		Cytosol	CYTOSOL
P08240	SRPRA	ENDOPLASMIC RETICULUM	Endoplasmic Reticulum	ENDOPLASMIC RETICULUM
P08243	ASNS	CYTOSOL	Cytosol	CYTOSOL
P08246	ELANE		Lysosome	LYSOSOME
P08311	CTSG		Lysosome	PLASMA MEMBRANE
P08397	HMBS	CYTOSOL	Cytosol	CYTOSOL
P08559	PDHA1	MITOCHONDRIA	Mitochondria	MITOCHONDRIA
P08567	PLEK		unknown	PLASMA MEMBRANE
P08571	CD14		Plasma Membrane	PLASMA MEMBRANE
P08574	CYC1	MITOCHONDRIA	Mitochondria	MITOCHONDRIA
P08575	PTPRC	PLASMA MEMBRANE	Plasma Membrane	PLASMA MEMBRANE
P08579	SNRPB2	NUCLEUS	Nucleus	NUCLEUS
P08582	MELTF	PLASMA MEMBRANE	Plasma Membrane	PLASMA MEMBRANE
P08588				PLASMA MEMBRANE
P08621	SNRNP70	NUCLEUS	Nucleus	NUCLEUS
P08631	HCK		unknown	PLASMA MEMBRANE
P08648	ITGA5	PLASMA MEMBRANE	Plasma Membrane	PLASMA MEMBRANE
P08670	VIM		Nucleus	NUCLEUS
P08708	RPS17	40S/60S RIBOSOME	40S/60S Ribosome	40S/60S RIBOSOME
P08754	GNAI3		Plasma Membrane	PLASMA MEMBRANE
P08758	ANXA5		Cytosol	CYTOSOL
P08865	RPSA	40S/60S RIBOSOME	40S/60S Ribosome	40S/60S RIBOSOME
P08887	IL6R		Lysosome	PLASMA MEMBRANE
P08962	CD63		Lysosome	LYSOSOME
P09001	MRPL3	MITOCHONDRIA	Mitochondria	MITOCHONDRIA
P09012	SNRPA	NUCLEUS	Nucleus	NUCLEUS
P09110	ACAA1	PEROXISOME	Peroxisome	PEROXISOME
P09132	SRP19		unknown	40S/60S RIBOSOME
P09211	GSTP1		Cytosol	CYTOSOL
P09382	LGALS1		Cytosol	CYTOSOL
P09417	QDPR		unknown	NUCLEUS
P09429	HMGB1		Chromatin	CHROMATIN
P09496-2	CLTA		unknown	PLASMA MEMBRANE
P09497-2	CLTB		unknown	CYTOSOL
P09525	ANXA4		unknown	CYTOSOL
P09543-2				PLASMA MEMBRANE
P09601	HMOX1	ENDOPLASMIC RETICULUM	Endoplasmic Reticulum	ENDOPLASMIC RETICULUM
P09622	DLD	MITOCHONDRIA	Mitochondria	MITOCHONDRIA
P09661	SNRPA1	NUCLEUS	Nucleus	NUCLEUS
P09669	COX6C		Mitochondria	MITOCHONDRIA
P09769	FGR		unknown	PLASMA MEMBRANE
P09874	PARP1		Chromatin	CHROMATIN
P09958	FURIN		unknown	PLASMA MEMBRANE
P09960				CYTOSOL
P09972	ALDOC		Cytosol	CYTOSOL
P0C0S5	H2AFV	CHROMATIN	Chromatin	CHROMATIN
P0C7P0	CISD3		Mitochondria	MITOCHONDRIA
P0CG08				ENDOPLASMIC RETICULUM
P0CG12	CHTF8		40S/60S Ribosome	40S/60S RIBOSOME
P0DMV9	HSPA1B		Cytosol	CYTOSOL
P10109	FDX1		Mitochondria	MITOCHONDRIA
P10124	SRGN		Plasma Membrane	PLASMA MEMBRANE
P10153	RNASE2		Lysosome	LYSOSOME
P10253	GAA	LYSOSOME	Lysosome	LYSOSOME
P10301	RRAS		Lysosome	PLASMA MEMBRANE
P10398	ARAF		unknown	CYTOSOL
P10412	HIST1H1E	CHROMATIN	Chromatin	CHROMATIN
P10415	BCL2		Endoplasmic Reticulum	ENDOPLASMIC RETICULUM
P10515	DLAT	MITOCHONDRIA	Mitochondria	MITOCHONDRIA
P10586	PTPRF	PLASMA MEMBRANE	Plasma Membrane	PLASMA MEMBRANE
P10599	TXN		Cytosol	CYTOSOL
P10606	COX5B		Mitochondria	MITOCHONDRIA
P10619	CTSA	LYSOSOME	Lysosome	LYSOSOME
P10620	MGST1		Endoplasmic Reticulum	ENDOPLASMIC RETICULUM
P10644	PRKAR1A		Cytosol	CYTOSOL
P10768	ESD		Cytosol	CYTOSOL
P10809	HSPD1	MITOCHONDRIA	Mitochondria	MITOCHONDRIA
P11021	HSPA5		Endoplasmic Reticulum	ENDOPLASMIC RETICULUM
P11047	LAMC1		Endoplasmic Reticulum	ENDOPLASMIC RETICULUM
P11049	CD37		unknown	GOLGI APPARATUS
P11117	ACP2	LYSOSOME	Lysosome	LYSOSOME
P11142	HSPA8		Cytosol	CYTOSOL
P11166	SLC2A1	PLASMA MEMBRANE	Plasma Membrane	PLASMA MEMBRANE
P11171	EPB41		unknown	PLASMA MEMBRANE
P11172	UMPS		unknown	CYTOSOL
P11177	PDHB	MITOCHONDRIA	Mitochondria	MITOCHONDRIA
P11182	DBT	MITOCHONDRIA	Mitochondria	MITOCHONDRIA
P11215-2	ITGAM	PLASMA MEMBRANE	Plasma Membrane	PLASMA MEMBRANE
P11216				CYTOSOL
P11233	RALA		Lysosome	PLASMA MEMBRANE
P11234-2	RALB	PLASMA MEMBRANE	Plasma Membrane	PLASMA MEMBRANE
P11274	BCR		Plasma Membrane	PLASMA MEMBRANE
P11279	LAMP1	LYSOSOME	Lysosome	LYSOSOME
P11310-2	ACADM	MITOCHONDRIA	Mitochondria	MITOCHONDRIA
P11387	TOP1.00		Chromatin	CHROMATIN
P11388-4	TOP2A		Chromatin	CHROMATIN
P11413-2	G6PD		Cytosol	CYTOSOL
P11498	PC		Mitochondria	MITOCHONDRIA
P11586	MTHFD1		unknown	40S/60S RIBOSOME
P11717	IGF2R	LYSOSOME	Lysosome	LYSOSOME
P11908				CYTOSOL
P11940	PABPC3		Nucleus	NUCLEUS
P12004	PCNA		Cytosol	NUCLEUS
P12081	HARS		Cytosol	CYTOSOL
P12109	COL6A1		Endoplasmic Reticulum	ENDOPLASMIC RETICULUM
P12236	SLC25A6		Mitochondria	MITOCHONDRIA
P12268	IMPDH2		Cytosol	NUCLEUS
P12270	TPR		Cytosol	NUCLEUS
P12277				CYTOSOL
P12314	FCGR1A		Lysosome	PLASMA MEMBRANE
P12318	FCGR2A	PLASMA MEMBRANE	Plasma Membrane	PLASMA MEMBRANE
P12694	BCKDHA		Mitochondria	MITOCHONDRIA
P12814	ACTN1		Cytosol	CYTOSOL
P12931-2	SRC		Plasma Membrane	PLASMA MEMBRANE
P12956	XRCC6	NUCLEUS	Nucleus	NUCLEUS
P13010	XRCC5	NUCLEUS	Nucleus	NUCLEUS
P13073	COX4I1	MITOCHONDRIA	Mitochondria	MITOCHONDRIA
P13196	ALAS1		unknown	MITOCHONDRIA
P13284	IFI30	LYSOSOME	Lysosome	LYSOSOME
P13473-2				LYSOSOME
P13489	RNH1		Cytosol	CYTOSOL
P13498	CYBA		unknown	PLASMA MEMBRANE
P13501	CCL5		Lysosome	PLASMA MEMBRANE
P13612	ITGA4	PLASMA MEMBRANE	Plasma Membrane	PLASMA MEMBRANE
P13639	EEF2		unknown	NUCLEUS
P13667	PDIA4		Endoplasmic Reticulum	ENDOPLASMIC RETICULUM
P13674	P4HA1		unknown	LYSOSOME
P13674-2	P4HA1		unknown	PLASMA MEMBRANE
P13693	TPT1		Cytosol	NUCLEUS
P13747	HLA-E		Lysosome	PLASMA MEMBRANE
P13796	LCP1		Cytosol	CYTOSOL
P13798	APEH		Cytosol	CYTOSOL
P13804	ETFA	MITOCHONDRIA	Mitochondria	MITOCHONDRIA
P13807	GYS1		Chromatin	GOLGI APPARATUS
P13861	PRKAR2A		unknown	CYTOSOL
P13984				NUCLEUS
P13987	CD59	PLASMA MEMBRANE	Plasma Membrane	PLASMA MEMBRANE
P13995	MTHFD2	MITOCHONDRIA	Mitochondria	MITOCHONDRIA
P14174	MIF		unknown	CYTOSOL
P14209	CD99		Plasma Membrane	PLASMA MEMBRANE
P14314	PRKCSH		Endoplasmic Reticulum	ENDOPLASMIC RETICULUM
P14317	HCLS1		Cytosol	CYTOSOL
P14324	FDPS		Cytosol	CYTOSOL
P14384	CPM		unknown	PLASMA MEMBRANE
P14543	NID1		Lysosome	GOLGI APPARATUS
P14550	AKR1A1		Cytosol	CYTOSOL
P14618	PKM		Cytosol	CYTOSOL
P14625	HSP90B1	ENDOPLASMIC RETICULUM	Endoplasmic Reticulum	ENDOPLASMIC RETICULUM
P14635				CHROMATIN
P14678-3	SNRPB		Nucleus	NUCLEUS
P14735	IDE		Cytosol	CYTOSOL
P14854	COX6B1		Mitochondria	MITOCHONDRIA
P14866	HNRNPL	NUCLEUS	Nucleus	NUCLEUS
P14868	DARS		Cytosol	CYTOSOL
P14923	JUP		unknown	PLASMA MEMBRANE
P14927	UQCRB		Mitochondria	MITOCHONDRIA
P15104				CYTOSOL
P15121	AKR1B1		Cytosol	CYTOSOL
P15144	ANPEP	PLASMA MEMBRANE	Plasma Membrane	PLASMA MEMBRANE
P15151	PVR	PLASMA MEMBRANE	Plasma Membrane	PLASMA MEMBRANE
P15153	RAC2		unknown	CYTOSOL
P15170-3	GSPT1		Cytosol	CYTOSOL
P15260				PLASMA MEMBRANE
P15289	ARSA	LYSOSOME	Lysosome	LYSOSOME
P15309-2				LYSOSOME
P15311	EZR		unknown	PLASMA MEMBRANE
P15374				CYTOSOL
P15498	VAV1		Cytosol	CYTOSOL
P15509-7	CSF2RA		unknown	PLASMA MEMBRANE
P15529-3	CD46		Plasma Membrane	PLASMA MEMBRANE
P15559	NQO1		unknown	CYTOSOL
P15586	GNS	LYSOSOME	Lysosome	LYSOSOME
P15848	ARSB	LYSOSOME	Lysosome	LYSOSOME
P15880	RPS2	40S/60S RIBOSOME	40S/60S Ribosome	40S/60S RIBOSOME
P15927-3				NUCLEUS
P15954	COX7C		Mitochondria	MITOCHONDRIA
P16070	CD44	PLASMA MEMBRANE	Plasma Membrane	PLASMA MEMBRANE
P16104	H2AFX	CHROMATIN	Chromatin	CHROMATIN
P16150	SPN		Plasma Membrane	PLASMA MEMBRANE
P16152	CBR1	CYTOSOL	Cytosol	CYTOSOL
P16219	ACADS	MITOCHONDRIA	Mitochondria	MITOCHONDRIA
P16278	GLB1	LYSOSOME	Lysosome	LYSOSOME
P16284	PECAM1	PLASMA MEMBRANE	Plasma Membrane	PLASMA MEMBRANE
P16333	NCK1		unknown	CYTOSOL
P16401	HIST1H1B	CHROMATIN	Chromatin	CHROMATIN
P16402	HIST1H1D	CHROMATIN	Chromatin	CHROMATIN
P16403	HIST1H1C	CHROMATIN	Chromatin	CHROMATIN
P16435	POR	ENDOPLASMIC RETICULUM	Endoplasmic Reticulum	ENDOPLASMIC RETICULUM
P16455	MGMT		unknown	CHROMATIN
P16615	ATP2A2	ENDOPLASMIC RETICULUM	Endoplasmic Reticulum	ENDOPLASMIC RETICULUM
P16885	PLCG2		Cytosol	CYTOSOL
P16930	FAH	CYTOSOL	Cytosol	CYTOSOL
P16949	STMN1		Cytosol	CYTOSOL
P16989				PLASMA MEMBRANE
P17050	NAGA	LYSOSOME	Lysosome	LYSOSOME
P17152	TMEM11		Mitochondria	MITOCHONDRIA
P17252	PRKCA		Cytosol	CYTOSOL
P17480	UBTF		Chromatin	CHROMATIN
P17568	NDUFB7		Mitochondria	MITOCHONDRIA
P17612				CYTOSOL
P17655	CAPN2		Cytosol	CYTOSOL
P17706	PTPN2		unknown	ENDOPLASMIC RETICULUM
P17812	CTPS1	CYTOSOL	Cytosol	CYTOSOL
P17813	ENG		unknown	PLASMA MEMBRANE
P17844	DDX5		Nucleus	NUCLEUS
P17858	PFKL		Cytosol	NUCLEUS
P17931	LGALS3		Lysosome	PLASMA MEMBRANE
P17980	PSMC3		Cytosol	CYTOSOL
P17987	TCP1		Cytosol	CYTOSOL
P18031	PTPN1	ENDOPLASMIC RETICULUM	Endoplasmic Reticulum	ENDOPLASMIC RETICULUM
P18074				CYTOSOL
P18077	RPL35A	40S/60S RIBOSOME	40S/60S Ribosome	40S/60S RIBOSOME
P18084	ITGB5	PLASMA MEMBRANE	Plasma Membrane	PLASMA MEMBRANE
P18124	RPL7	40S/60S RIBOSOME	40S/60S Ribosome	40S/60S RIBOSOME
P18206	VCL		Cytosol	CYTOSOL
P18433	PTPRA		Plasma Membrane	PLASMA MEMBRANE
P18583-5				NUCLEOLUS
P18615-3	NELFE		Nucleus	NUCLEUS
P18621-3	RPL17	40S/60S RIBOSOME	40S/60S Ribosome	40S/60S RIBOSOME
P18669	PGAM1		Cytosol	CYTOSOL
P18754-2	RCC1	CHROMATIN	Chromatin	CHROMATIN
P18850	ATF6		Endoplasmic Reticulum	ENDOPLASMIC RETICULUM
P18858				CYTOSOL
P18859-2	ATP5J		Mitochondria	MITOCHONDRIA
P19022				PLASMA MEMBRANE
P19338	NCL		Cytosol	NUCLEUS
P19367-3				MITOCHONDRIA
P19387				NUCLEUS
P19388	POLR2E	NUCLEUS	Nucleus	NUCLEUS
P19404	NDUFV2	MITOCHONDRIA	Mitochondria	MITOCHONDRIA
P19440	GGT1	PLASMA MEMBRANE	Plasma Membrane	PLASMA MEMBRANE
P19447				CHROMATIN
P19474	TRIM21		Cytosol	CYTOSOL
P19525	EIF2AK2		Nucleus	40S/60S RIBOSOME
P19532	TFE3		Chromatin	CHROMATIN
P19623	SRM	CYTOSOL	Cytosol	CYTOSOL
P19634	SLC9A1		Lysosome	PLASMA MEMBRANE
P19801-2	AOC1		unknown	LYSOSOME
P19838-2	NFKB1		unknown	CYTOSOL
P19878	NCF2		unknown	CYTOSOL
P19971	TYMP		Cytosol	CYTOSOL
P20020	ATP2B1	PLASMA MEMBRANE	Plasma Membrane	PLASMA MEMBRANE
P20042	EIF2S2		Nucleus	NUCLEUS
P20073	ANXA7		Cytosol	CYTOSOL
P20138	CD33	PLASMA MEMBRANE	Plasma Membrane	PLASMA MEMBRANE
P20160	AZU1		Lysosome	PLASMA MEMBRANE
P20290	BTF3		unknown	PLASMA MEMBRANE
P20333	TNFRSF1B		Plasma Membrane	PLASMA MEMBRANE
P20338	RAB4A		unknown	CYTOSOL
P20339	RAB5A		unknown	LYSOSOME
P20585	MSH3		Chromatin	CHROMATIN
P20591	MX1		Cytosol	CYTOSOL
P20592	MX2		unknown	CHROMATIN
P20618	PSMB1		Cytosol	CYTOSOL
P20645	M6PR	LYSOSOME	Lysosome	LYSOSOME
P20674	COX5A		Mitochondria	MITOCHONDRIA
P20700	LMNB1		Chromatin	CHROMATIN
P20701-2	ITGAL	PLASMA MEMBRANE	Plasma Membrane	PLASMA MEMBRANE
P20702	ITGAX		unknown	PLASMA MEMBRANE
P20839-6	IMPDH1		Cytosol	CYTOSOL
P20933	AGA		unknown	LYSOSOME
P21281	ATP6V1B2		unknown	LYSOSOME
P21283	ATP6V1C1		Cytosol	CYTOSOL
P21291	CSRP1		unknown	PLASMA MEMBRANE
P21359	NF1		unknown	PLASMA MEMBRANE
P21796	VDAC1		Mitochondria	MITOCHONDRIA
P21912	SDHB	MITOCHONDRIA	Mitochondria	MITOCHONDRIA
P21953	BCKDHB	MITOCHONDRIA	Mitochondria	MITOCHONDRIA
P21964	COMT		Endoplasmic Reticulum	ENDOPLASMIC RETICULUM
P22033	MUT	MITOCHONDRIA	Mitochondria	MITOCHONDRIA
P22059	OSBP		unknown	CYTOSOL
P22061-2	PCMT1		unknown	CYTOSOL
P22083	FUT4	GOLGI APPARATUS	Golgi Apparatus	GOLGI APPARATUS
P22087	FBL	NUCLEOLUS	Nucleolus	NUCLEOLUS
P22090	RPS4Y1	40S/60S RIBOSOME	40S/60S Ribosome	NUCLEUS
P22102	GART		Cytosol	CYTOSOL
P22234-2	PAICS		Cytosol	CYTOSOL
P22307	SCP2		Peroxisome	PEROXISOME
P22392-2	NME2P1		Cytosol	CYTOSOL
P22570-3				MITOCHONDRIA
P22626	HNRNPA2B1		Nucleus	NUCLEUS
P22681	CBL		Cytosol	CYTOSOL
P22692	IGFBP4		unknown	GOLGI APPARATUS
P22695	UQCRC2	MITOCHONDRIA	Mitochondria	MITOCHONDRIA
P22732	SLC2A5	PLASMA MEMBRANE	Plasma Membrane	PLASMA MEMBRANE
P22794-2	EVI2A		Plasma Membrane	PLASMA MEMBRANE
P22830-2	FECH	MITOCHONDRIA	Mitochondria	MITOCHONDRIA
P23141-2	CES1P1		Endoplasmic Reticulum	ENDOPLASMIC RETICULUM
P23193	TCEA1	NUCLEUS	Nucleus	NUCLEUS
P23219-5	PTGS1	ENDOPLASMIC RETICULUM	Endoplasmic Reticulum	ENDOPLASMIC RETICULUM
P23246	SFPQ		Nucleus	NUCLEOLUS
P23258	TUBG1		Nucleus	NUCLEOLUS
P23284	PPIB		Endoplasmic Reticulum	ENDOPLASMIC RETICULUM
P23368	ME2	MITOCHONDRIA	Mitochondria	MITOCHONDRIA
P23381	WARS		Cytosol	CYTOSOL
P23396	RPS3	40S/60S RIBOSOME	40S/60S Ribosome	40S/60S RIBOSOME
P23434	GCSH		Mitochondria	MITOCHONDRIA
P23443				CYTOSOL
P23458	JAK1		unknown	PLASMA MEMBRANE
P23469	PTPRE		unknown	CYTOSOL
P23526	AHCY		Cytosol	CYTOSOL
P23528	CFL1		Cytosol	CYTOSOL
P23588	EIF4B		Cytosol	CYTOSOL
P23634	ATP2B4	PLASMA MEMBRANE	Plasma Membrane	PLASMA MEMBRANE
P23786	CPT2	MITOCHONDRIA	Mitochondria	MITOCHONDRIA
P23919	DTYMK		unknown	NUCLEUS
P23921	RRM1		Cytosol	CYTOSOL
P24158				ENDOPLASMIC RETICULUM
P24534	EEF1B2		unknown	NUCLEUS
P24539	ATP5F1	MITOCHONDRIA	Mitochondria	MITOCHONDRIA
P24557-3	TBXAS1		Endoplasmic Reticulum	ENDOPLASMIC RETICULUM
P24666	ACP1		Cytosol	CYTOSOL
P24752	ACAT1	MITOCHONDRIA	Mitochondria	MITOCHONDRIA
P24844	MYL9		unknown	NUCLEUS
P24928	POLR2A		Nucleus	NUCLEUS
P24941	CDK2		Nucleus	NUCLEUS
P25054				GOLGI APPARATUS
P25098	GRK2		Cytosol	CYTOSOL
P25205-2	MCM3		unknown	NUCLEUS
P25325-2	MPST		unknown	CYTOSOL
P25398	RPS12	40S/60S RIBOSOME	40S/60S Ribosome	40S/60S RIBOSOME
P25490	YY1	CHROMATIN	Chromatin	CHROMATIN
P25685	DNAJB1		unknown	NUCLEUS
P25686	DNAJB2		unknown	GOLGI APPARATUS
P25705	ATP5A1		Mitochondria	MITOCHONDRIA
P25774	CTSS	LYSOSOME	Lysosome	LYSOSOME
P25786-2	PSMA1		Cytosol	CYTOSOL
P25787	PSMA2		Cytosol	CYTOSOL
P25788	PSMA3		Cytosol	CYTOSOL
P25789	PSMA4		Cytosol	CYTOSOL
P25942	CD40		unknown	PLASMA MEMBRANE
P26010	ITGB7		Lysosome	PLASMA MEMBRANE
P26038	MSN		Lysosome	PLASMA MEMBRANE
P26196	DDX6		Nucleus	NUCLEUS
P26368	U2AF2	NUCLEUS	Nucleus	NUCLEUS
P26373	RPL13	40S/60S RIBOSOME	40S/60S Ribosome	40S/60S RIBOSOME
P26440	IVD	MITOCHONDRIA	Mitochondria	MITOCHONDRIA
P26447	S100A4		Cytosol	CYTOSOL
P26572	MGAT1	GOLGI APPARATUS	Golgi Apparatus	GOLGI APPARATUS
P26583	HMGB2	CHROMATIN	Chromatin	CHROMATIN
P26599-3	PTBP1		Nucleus	NUCLEUS
P26639	TARS		Cytosol	CYTOSOL
P26640	VARS		Cytosol	CYTOSOL
P26641				NUCLEUS
P26885	FKBP2		Endoplasmic Reticulum	ENDOPLASMIC RETICULUM
P27105	STOM		Plasma Membrane	PLASMA MEMBRANE
P27144	AK4	MITOCHONDRIA	Mitochondria	MITOCHONDRIA
P27348	YWHAQ		Cytosol	CYTOSOL
P27361	MAPK3		Cytosol	CYTOSOL
P27448	MARK3		unknown	PLASMA MEMBRANE
P27449	ATP6V0C		unknown	LYSOSOME
P27540	ARNT	NUCLEUS	Nucleus	NUCLEUS
P27635	RPL10	40S/60S RIBOSOME	40S/60S Ribosome	40S/60S RIBOSOME
P27694	RPA1		unknown	NUCLEUS
P27695	APEX1		Nucleus	NUCLEUS
P27701	CD82		unknown	PLASMA MEMBRANE
P27707	DCK		Cytosol	CYTOSOL
P27708	CAD		Cytosol	CYTOSOL
P27797	CALR		Endoplasmic Reticulum	ENDOPLASMIC RETICULUM
P27816	MAP4		unknown	GOLGI APPARATUS
P27824-2	CANX	ENDOPLASMIC RETICULUM	Endoplasmic Reticulum	ENDOPLASMIC RETICULUM
P27918	CFP		unknown	PLASMA MEMBRANE
P27986	PIK3R1		unknown	NUCLEUS
P28062	PSMB8		Cytosol	CYTOSOL
P28065	PSMB9		Cytosol	CYTOSOL
P28066	PSMA5		Cytosol	CYTOSOL
P28070	PSMB4		Cytosol	CYTOSOL
P28288	ABCD3	PEROXISOME	Peroxisome	PEROXISOME
P28290	SSFA2		Endoplasmic Reticulum	ENDOPLASMIC RETICULUM
P28331-2	NDUFS1	MITOCHONDRIA	Mitochondria	MITOCHONDRIA
P28340	POLD1		unknown	NUCLEUS
P28482	MAPK1		Cytosol	CYTOSOL
P28799	GRN		unknown	LYSOSOME
P28907	CD38		unknown	PLASMA MEMBRANE
P29144	TPP2		unknown	NUCLEOLUS
P29218-3	IMPA1	CYTOSOL	Cytosol	CYTOSOL
P29350-3				NUCLEUS
P29353-6	SHC1		unknown	GOLGI APPARATUS
P29372	MPG		Chromatin	CHROMATIN
P29401-2				CYTOSOL
P29466	CASP1		Cytosol	CYTOSOL
P29590				NUCLEUS
P29597	TYK2		Plasma Membrane	PLASMA MEMBRANE
P29692-2				NUCLEUS
P29762	CRABP1	CYTOSOL	Cytosol	CYTOSOL
P30038	ALDH4A1	MITOCHONDRIA	Mitochondria	MITOCHONDRIA
P30040	ERP29		Endoplasmic Reticulum	ENDOPLASMIC RETICULUM
P30041	PRDX6		Cytosol	CYTOSOL
P30042	C21orf33	MITOCHONDRIA	Mitochondria	MITOCHONDRIA
P30043	BLVRB		Cytosol	CYTOSOL
P30044				NUCLEUS
P30048	PRDX3		Mitochondria	MITOCHONDRIA
P30049	ATP5D		Mitochondria	MITOCHONDRIA
P30050	RPL12	40S/60S RIBOSOME	40S/60S Ribosome	40S/60S RIBOSOME
P30084	ECHS1	MITOCHONDRIA	Mitochondria	MITOCHONDRIA
P30085	CMPK1		Cytosol	CYTOSOL
P30086	PEBP1		Cytosol	CYTOSOL
P30101	PDIA3		Endoplasmic Reticulum	ENDOPLASMIC RETICULUM
P30153	PPP2R1A		Cytosol	CYTOSOL
P30273	FCER1G		Lysosome	PLASMA MEMBRANE
P30405	PPIF		Mitochondria	MITOCHONDRIA
P30419	NMT1		Nucleus	NUCLEUS
P30511-3	HLA-F		Lysosome	PLASMA MEMBRANE
P30519	HMOX2		Endoplasmic Reticulum	ENDOPLASMIC RETICULUM
P30520	ADSS		Cytosol	CYTOSOL
P30530	AXL		Plasma Membrane	PLASMA MEMBRANE
P30533	LRPAP1		Endoplasmic Reticulum	40S/60S RIBOSOME
P30536				MITOCHONDRIA
P30566	ADSL		Cytosol	CYTOSOL
P30622				CYTOSOL
P30626	SRI		unknown	CYTOSOL
P30740	SERPINB1		Cytosol	CYTOSOL
P30837	ALDH1B1	MITOCHONDRIA	Mitochondria	MITOCHONDRIA
P30876	POLR2B		Cytosol	NUCLEUS
P31040	SDHA	MITOCHONDRIA	Mitochondria	MITOCHONDRIA
P31146	CORO1A		Cytosol	CYTOSOL
P31153	MAT2A	CYTOSOL	Cytosol	CYTOSOL
P31323	PRKAR2B		unknown	CYTOSOL
P31483				CYTOSOL
P31689	DNAJA1		unknown	CYTOSOL
P31749				CYTOSOL
P31930	UQCRC1	MITOCHONDRIA	Mitochondria	MITOCHONDRIA
P31937	HIBADH	MITOCHONDRIA	Mitochondria	MITOCHONDRIA
P31939	ATIC		Cytosol	CYTOSOL
P31943	HNRNPH1		Cytosol	NUCLEUS
P31946	YWHAB		Cytosol	CYTOSOL
P31948-2	STIP1		Cytosol	CYTOSOL
P31949	S100A11		Cytosol	CYTOSOL
P32119	PRDX2		Cytosol	CYTOSOL
P32189	GK3P		unknown	MITOCHONDRIA
P32246	CCR1		Lysosome	PLASMA MEMBRANE
P32249				PLASMA MEMBRANE
P32322-3	PYCR1		Mitochondria	MITOCHONDRIA
P32519	ELF1		Chromatin	CHROMATIN
P32856				PLASMA MEMBRANE
P32942	ICAM3	PLASMA MEMBRANE	Plasma Membrane	PLASMA MEMBRANE
P32969	RPL9	40S/60S RIBOSOME	40S/60S Ribosome	40S/60S RIBOSOME
P32970	CD70	PLASMA MEMBRANE	Plasma Membrane	PLASMA MEMBRANE
P33121	ACSL1		unknown	ENDOPLASMIC RETICULUM
P33176	KIF5B		unknown	NUCLEUS
P33241-3	LSP1		unknown	PLASMA MEMBRANE
P33527	ABCC1		unknown	PLASMA MEMBRANE
P33897	ABCD1	PEROXISOME	Peroxisome	PEROXISOME
P33908	MAN1A1	GOLGI APPARATUS	Golgi Apparatus	GOLGI APPARATUS
P33981				CHROMATIN
P33991	MCM4		Cytosol	NUCLEUS
P33992	MCM5		unknown	NUCLEUS
P33993	MCM7		Cytosol	NUCLEUS
P34059	GALNS		Lysosome	LYSOSOME
P34820	BMP8B		Endoplasmic Reticulum	ENDOPLASMIC RETICULUM
P34897	SHMT2		Mitochondria	MITOCHONDRIA
P34910-2	EVI2B		Lysosome	PLASMA MEMBRANE
P34913	EPHX2		unknown	CYTOSOL
P34932	HSPA4	CYTOSOL	Cytosol	CYTOSOL
P34949				CYTOSOL
P35221-2	CTNNA1		Plasma Membrane	PLASMA MEMBRANE
P35222	CTNNB1		unknown	PLASMA MEMBRANE
P35226	BMI1		Chromatin	CHROMATIN
P35232	PHB	MITOCHONDRIA	Mitochondria	MITOCHONDRIA
P35236-3	PTPN7		Cytosol	CYTOSOL
P35240	NF2		unknown	PLASMA MEMBRANE
P35241	RDX		unknown	PLASMA MEMBRANE
P35244				NUCLEUS
P35249	RFC4	NUCLEUS	Nucleus	NUCLEUS
P35250	RFC2		Nucleus	CHROMATIN
P35251	RFC1		Chromatin	CHROMATIN
P35268	RPL22	40S/60S RIBOSOME	40S/60S Ribosome	40S/60S RIBOSOME
P35269	GTF2F1	NUCLEUS	Nucleus	NUCLEUS
P35270	SPR		Cytosol	CYTOSOL
P35408	PTGER4		Plasma Membrane	PLASMA MEMBRANE
P35475	IDUA	LYSOSOME	Lysosome	LYSOSOME
P35520-2	CBSL		Cytosol	CYTOSOL
P35556	FBN2		Endoplasmic Reticulum	ENDOPLASMIC RETICULUM
P35579	MYH9		Nucleus	CYTOSOL
P35606	COPB2		Cytosol	CYTOSOL
P35611-3	ADD1		unknown	GOLGI APPARATUS
P35613	BSG		Lysosome	PLASMA MEMBRANE
P35625	TIMP3		unknown	GOLGI APPARATUS
P35637	FUS	NUCLEUS	Nucleus	NUCLEUS
P35658-5	NUP214	NUCLEUS	Nucleus	CHROMATIN
P35659	DEK	CHROMATIN	Chromatin	CHROMATIN
P35914	HMGCL		Mitochondria	MITOCHONDRIA
P35998	PSMC2		Cytosol	CYTOSOL
P36222	CHI3L1		Endoplasmic Reticulum	ENDOPLASMIC RETICULUM
P36404	ARL2.00		Cytosol	CYTOSOL
P36405	ARL3.00		Cytosol	CYTOSOL
P36507	MAP2K2		Cytosol	CYTOSOL
P36542	ATP5C1		Mitochondria	MITOCHONDRIA
P36543	ATP6V1E1		unknown	LYSOSOME
P36551	CPOX		Mitochondria	MITOCHONDRIA
P36578	RPL4	40S/60S RIBOSOME	40S/60S Ribosome	40S/60S RIBOSOME
P36639	NUDT1		Cytosol	CYTOSOL
P36776	LONP1	MITOCHONDRIA	Mitochondria	MITOCHONDRIA
P36871				CYTOSOL
P36915				CYTOSOL
P36957	DLST	MITOCHONDRIA	Mitochondria	MITOCHONDRIA
P36969	GPX4		unknown	NUCLEUS
P37108	SRP14		unknown	NUCLEUS
P37198	NUP62		unknown	NUCLEUS
P37235	HPCAL1		Cytosol	CYTOSOL
P37268	FDFT1	ENDOPLASMIC RETICULUM	Endoplasmic Reticulum	ENDOPLASMIC RETICULUM
P37287	PIGA		Endoplasmic Reticulum	ENDOPLASMIC RETICULUM
P37802	TAGLN2	CYTOSOL	Cytosol	CYTOSOL
P37837	TALDO1	CYTOSOL	Cytosol	CYTOSOL
P38117	ETFB	MITOCHONDRIA	Mitochondria	MITOCHONDRIA
P38159				NUCLEOLUS
P38398-7				CHROMATIN
P38432	COIL		unknown	CHROMATIN
P38435	GGCX		Endoplasmic Reticulum	ENDOPLASMIC RETICULUM
P38606	ATP6V1A		unknown	CYTOSOL
P38646	HSPA9		Mitochondria	MITOCHONDRIA
P38919	EIF4A3		Nucleus	NUCLEUS
P38935				PLASMA MEMBRANE
P39019	RPS19	40S/60S RIBOSOME	40S/60S Ribosome	40S/60S RIBOSOME
P39023	RPL3	40S/60S RIBOSOME	40S/60S Ribosome	40S/60S RIBOSOME
P39656	DDOST		Endoplasmic Reticulum	ENDOPLASMIC RETICULUM
P39687	ANP32A		Cytosol	CYTOSOL
P39748	FEN1		Nucleus	NUCLEUS
P40121	CAPG		Cytosol	CYTOSOL
P40222	TXLNA		unknown	CHROMATIN
P40227	CCT6A		Cytosol	CYTOSOL
P40306	PSMB10		Cytosol	CYTOSOL
P40429	RPL13A	40S/60S RIBOSOME	40S/60S Ribosome	40S/60S RIBOSOME
P40763	STAT3		Cytosol	CYTOSOL
P40818	USP8		unknown	GOLGI APPARATUS
P40925-3	MDH1	CYTOSOL	Cytosol	CYTOSOL
P40926	MDH2		Mitochondria	MITOCHONDRIA
P40937	RFC5	NUCLEUS	Nucleus	NUCLEUS
P40938	RFC3		Nucleus	NUCLEUS
P40939	HADHA	MITOCHONDRIA	Mitochondria	MITOCHONDRIA
P41091	EIF2S3		Nucleus	NUCLEUS
P41208				CHROMATIN
P41218	MNDA		Chromatin	CHROMATIN
P41223	BUD31	NUCLEUS	Nucleus	NUCLEUS
P41226	UBA7		Cytosol	CYTOSOL
P41227	NAA10		Cytosol	CYTOSOL
P41240	CSK		unknown	CYTOSOL
P41250	GARS		Cytosol	NUCLEUS
P41252	IARS		Cytosol	CYTOSOL
P41440	SLC19A1		Lysosome	PLASMA MEMBRANE
P42025				CYTOSOL
P42126	ECI1	MITOCHONDRIA	Mitochondria	MITOCHONDRIA
P42166	TMPO	CHROMATIN	Chromatin	CHROMATIN
P42167	TMPO		Chromatin	CHROMATIN
P42224				CYTOSOL
P42226	STAT6		Cytosol	CYTOSOL
P42285	SKIV2L2	NUCLEUS	Nucleus	NUCLEUS
P42331-4	ARHGAP25		Cytosol	CYTOSOL
P42338				NUCLEUS
P42345	MTOR		unknown	GOLGI APPARATUS
P42356	PI4KA		unknown	PLASMA MEMBRANE
P42566	EPS15		unknown	CYTOSOL
P42574	CASP3		Cytosol	CYTOSOL
P42677	RPS27	40S/60S RIBOSOME	40S/60S Ribosome	40S/60S RIBOSOME
P42695				CHROMATIN
P42696	RBM34		unknown	NUCLEOLUS
P42704	LRPPRC		Mitochondria	MITOCHONDRIA
P42765	ACAA2	MITOCHONDRIA	Mitochondria	MITOCHONDRIA
P42766	RPL35	40S/60S RIBOSOME	40S/60S Ribosome	40S/60S RIBOSOME
P42768	WAS		unknown	GOLGI APPARATUS
P42785	PRCP	LYSOSOME	Lysosome	LYSOSOME
P42858				CYTOSOL
P42892				PLASMA MEMBRANE
P43007	SLC1A4		Lysosome	PLASMA MEMBRANE
P43155	CRAT		Mitochondria	MITOCHONDRIA
P43243	MATR3		Nucleus	NUCLEUS
P43246	MSH2	NUCLEUS	Nucleus	NUCLEUS
P43250-2				PLASMA MEMBRANE
P43251-2	BTD		unknown	LYSOSOME
P43304	GPD2	MITOCHONDRIA	Mitochondria	MITOCHONDRIA
P43307	SSR1		unknown	ENDOPLASMIC RETICULUM
P43353	ALDH3B1		unknown	PLASMA MEMBRANE
P43378				LYSOSOME
P43405	SYK		unknown	NUCLEUS
P43487	RANBP1		Cytosol	CYTOSOL
P43490	NAMPT		Cytosol	CYTOSOL
P43686	PSMC4		Cytosol	CYTOSOL
P43897	TSFM	MITOCHONDRIA	Mitochondria	MITOCHONDRIA
P45954	ACADSB	MITOCHONDRIA	Mitochondria	MITOCHONDRIA
P45973	CBX5	CHROMATIN	Chromatin	CHROMATIN
P45974	USP5		Cytosol	CYTOSOL
P46013				CHROMATIN
P46060	RANGAP1		unknown	NUCLEUS
P46063	RECQL		unknown	CHROMATIN
P46100	ATRX		Chromatin	CHROMATIN
P46109	CRKL		Cytosol	CYTOSOL
P46199	MTIF2		Mitochondria	MITOCHONDRIA
P46379-3	BAG6		Cytosol	CYTOSOL
P46459	NSF		unknown	CYTOSOL
P46531	NOTCH1		unknown	PLASMA MEMBRANE
P46776	RPL27A	40S/60S RIBOSOME	40S/60S Ribosome	40S/60S RIBOSOME
P46777	RPL5	40S/60S RIBOSOME	40S/60S Ribosome	40S/60S RIBOSOME
P46778	RPL21	40S/60S RIBOSOME	40S/60S Ribosome	40S/60S RIBOSOME
P46779	RPL28	40S/60S RIBOSOME	40S/60S Ribosome	40S/60S RIBOSOME
P46781	RPS9	40S/60S RIBOSOME	40S/60S Ribosome	40S/60S RIBOSOME
P46782	RPS5	40S/60S RIBOSOME	40S/60S Ribosome	40S/60S RIBOSOME
P46783	RPS10	40S/60S RIBOSOME	40S/60S Ribosome	40S/60S RIBOSOME
P46939	UTRN		Lysosome	PLASMA MEMBRANE
P46940	IQGAP1		Cytosol	CYTOSOL
P46977	STT3A		Endoplasmic Reticulum	ENDOPLASMIC RETICULUM
P47224				CYTOSOL
P47755	CAPZA2		Cytosol	CYTOSOL
P47756-2	CAPZB		Cytosol	CYTOSOL
P47897	QARS		Cytosol	CYTOSOL
P47914	RPL29	40S/60S RIBOSOME	40S/60S Ribosome	40S/60S RIBOSOME
P47974				CYTOSOL
P47985	UQCRFS1		Mitochondria	MITOCHONDRIA
P48047	ATP5O		Mitochondria	MITOCHONDRIA
P48059-3	LIMS1		unknown	PLASMA MEMBRANE
P48060				LYSOSOME
P48147	PREP		Cytosol	CYTOSOL
P48426	PIP4K2A		unknown	PLASMA MEMBRANE
P48444	ARCN1		Cytosol	CYTOSOL
P48449	LSS	ENDOPLASMIC RETICULUM	Endoplasmic Reticulum	ENDOPLASMIC RETICULUM
P48507	GCLM	CYTOSOL	Cytosol	CYTOSOL
P48509	CD151		unknown	PLASMA MEMBRANE
P48553	TRAPPC10		unknown	PLASMA MEMBRANE
P48556	PSMD8		Cytosol	CYTOSOL
P48595				CYTOSOL
P48634	PRRC2A		unknown	40S/60S RIBOSOME
P48637	GSS	CYTOSOL	Cytosol	CYTOSOL
P48643	CCT5		Cytosol	CYTOSOL
P48651	PTDSS1		Endoplasmic Reticulum	ENDOPLASMIC RETICULUM
P48723	HSPA13		Endoplasmic Reticulum	ENDOPLASMIC RETICULUM
P48729-2				NUCLEOLUS
P48735	IDH2	MITOCHONDRIA	Mitochondria	MITOCHONDRIA
P48960	CD97		Lysosome	PLASMA MEMBRANE
P49005				NUCLEUS
P49023-3				PLASMA MEMBRANE
P49069	CAMLG		Endoplasmic Reticulum	ENDOPLASMIC RETICULUM
P49137	MAPKAPK2		Cytosol	CYTOSOL
P49189	ALDH9A1		unknown	MITOCHONDRIA
P49207	RPL34	40S/60S RIBOSOME	40S/60S Ribosome	40S/60S RIBOSOME
P49247	RPIA		Cytosol	CYTOSOL
P49257	LMAN1		Endoplasmic Reticulum	ENDOPLASMIC RETICULUM
P49321-3	NASP		Cytosol	CYTOSOL
P49327	FASN		Cytosol	CYTOSOL
P49368	CCT3		unknown	CYTOSOL
P49406	MRPL19		Mitochondria	MITOCHONDRIA
P49407-2				CYTOSOL
P49411	TUFM	MITOCHONDRIA	Mitochondria	MITOCHONDRIA
P49448	GLUD2	MITOCHONDRIA	Mitochondria	MITOCHONDRIA
P49458	SRP9		Nucleus	NUCLEUS
P49585	PCYT1A		Cytosol	CYTOSOL
P49588	AARS	CYTOSOL	Cytosol	CYTOSOL
P49590	HARS2	MITOCHONDRIA	Mitochondria	MITOCHONDRIA
P49591	SARS		Cytosol	CYTOSOL
P49593	PPM1F		Cytosol	CYTOSOL
P49674				PLASMA MEMBRANE
P49711	CTCF	CHROMATIN	Chromatin	CHROMATIN
P49715-4				CHROMATIN
P49720				CYTOSOL
P49721				CYTOSOL
P49736	MCM2		Cytosol	CYTOSOL
P49748-3	ACADVL	MITOCHONDRIA	Mitochondria	MITOCHONDRIA
P49750-4				CHROMATIN
P49755	TMED10		Endoplasmic Reticulum	ENDOPLASMIC RETICULUM
P49756	RBM25		Nucleus	NUCLEUS
P49757	NUMB		Lysosome	PLASMA MEMBRANE
P49768	PSEN1		Lysosome	PLASMA MEMBRANE
P49773	HINT1		Cytosol	CYTOSOL
P49790-3	NUP153		Nucleus	CHROMATIN
P49792	RANBP2		unknown	CHROMATIN
P49795	RGS19		Plasma Membrane	PLASMA MEMBRANE
P49810	PSEN2		Lysosome	PLASMA MEMBRANE
P49821	NDUFV1	MITOCHONDRIA	Mitochondria	MITOCHONDRIA
P49840	GSK3A		unknown	PLASMA MEMBRANE
P49841-2	GSK3B		unknown	PLASMA MEMBRANE
P49915	GMPS		Cytosol	CYTOSOL
P49916	LIG3		Chromatin	CHROMATIN
P49959-3	MRE11A	CHROMATIN	Chromatin	CHROMATIN
P50148	GNAQ		Plasma Membrane	PLASMA MEMBRANE
P50151	GNG10	PLASMA MEMBRANE	Plasma Membrane	PLASMA MEMBRANE
P50213	IDH3A	MITOCHONDRIA	Mitochondria	MITOCHONDRIA
P50225	SULT1A1		Cytosol	CYTOSOL
P50238	CRIP1		Plasma Membrane	PLASMA MEMBRANE
P50281	MMP14		unknown	PLASMA MEMBRANE
P50336	PPOX		Mitochondria	MITOCHONDRIA
P50395	GDI2		Cytosol	CYTOSOL
P50416	CPT1A		unknown	ENDOPLASMIC RETICULUM
P50440-2	GATM		Mitochondria	MITOCHONDRIA
P50452	SERPINB8	CYTOSOL	Cytosol	CYTOSOL
P50454	SERPINH1		Endoplasmic Reticulum	ENDOPLASMIC RETICULUM
P50479	PDLIM4		unknown	PLASMA MEMBRANE
P50502	ST13P4	CYTOSOL	Cytosol	CYTOSOL
P50552	VASP		unknown	PLASMA MEMBRANE
P50750-2				NUCLEUS
P50895	BCAM	PLASMA MEMBRANE	Plasma Membrane	PLASMA MEMBRANE
P50897	PPT1	LYSOSOME	Lysosome	LYSOSOME
P50914	RPL14	40S/60S RIBOSOME	40S/60S Ribosome	40S/60S RIBOSOME
P50990	CCT8		Cytosol	CYTOSOL
P50991	CCT4		Cytosol	CYTOSOL
P50995	ANXA11		Cytosol	CYTOSOL
P51003	PAPOLA		unknown	CYTOSOL
P51148-2	RAB5C		Lysosome	LYSOSOME
P51149	RAB7A		Lysosome	LYSOSOME
P51151	RAB9A		unknown	LYSOSOME
P51153	RAB13		Lysosome	PLASMA MEMBRANE
P51159	RAB27A		Endoplasmic Reticulum	ENDOPLASMIC RETICULUM
P51398	DAP3	MITOCHONDRIA	Mitochondria	MITOCHONDRIA
P51452	DUSP3		Cytosol	CYTOSOL
P51531-2	SMARCA2	CHROMATIN	Chromatin	CHROMATIN
P51553	IDH3G		Mitochondria	MITOCHONDRIA
P51570-2	GALK1	CYTOSOL	Cytosol	CYTOSOL
P51571	SSR4	ENDOPLASMIC RETICULUM	Endoplasmic Reticulum	ENDOPLASMIC RETICULUM
P51572-2	BCAP31	ENDOPLASMIC RETICULUM	Endoplasmic Reticulum	ENDOPLASMIC RETICULUM
P51610	HCFC1		unknown	CHROMATIN
P51649-2	ALDH5A1	MITOCHONDRIA	Mitochondria	MITOCHONDRIA
P51659	HSD17B4	PEROXISOME	Peroxisome	PEROXISOME
P51665	PSMD7		Cytosol	CYTOSOL
P51689	ARSD		unknown	ENDOPLASMIC RETICULUM
P51787	KCNQ1		Lysosome	PLASMA MEMBRANE
P51797-5	CLCN6		Lysosome	LYSOSOME
P51798	CLCN7		Lysosome	LYSOSOME
P51809	VAMP7		Lysosome	LYSOSOME
P51812	RPS6KA3		Cytosol	CYTOSOL
P51828	ADCY7		unknown	PLASMA MEMBRANE
P51858				CYTOSOL
P51970	NDUFA8	MITOCHONDRIA	Mitochondria	MITOCHONDRIA
P51991	HNRNPA3	NUCLEUS	Nucleus	NUCLEUS
P52209	PGD	CYTOSOL	Cytosol	CYTOSOL
P52272	HNRNPM		Nucleus	NUCLEOLUS
P52292	KPNA2		Cytosol	NUCLEUS
P52294	KPNA1		unknown	CYTOSOL
P52306-5	RAP1GDS1		Cytosol	CYTOSOL
P52429	DGKE		Endoplasmic Reticulum	ENDOPLASMIC RETICULUM
P52565	ARHGDIA		Cytosol	CYTOSOL
P52566	ARHGDIB	CYTOSOL	Cytosol	CYTOSOL
P52594-4	AGFG1		unknown	PLASMA MEMBRANE
P52597	HNRNPF		Cytosol	NUCLEUS
P52630	STAT2		unknown	CYTOSOL
P52701	MSH6	CHROMATIN	Chromatin	CHROMATIN
P52732	KIF11		Nucleus	NUCLEUS
P52758	HRSP12		unknown	CYTOSOL
P52789	HK2		Cytosol	CYTOSOL
P52815	MRPL12		Mitochondria	MITOCHONDRIA
P52888	THOP1	CYTOSOL	Cytosol	CYTOSOL
P52907	CAPZA1		Cytosol	CYTOSOL
P52948	NUP98		Nucleus	CHROMATIN
P53007	SLC25A1	MITOCHONDRIA	Mitochondria	MITOCHONDRIA
P53041	PPP5C		Cytosol	CYTOSOL
P53350	PLK1		unknown	NUCLEUS
P53396				PLASMA MEMBRANE
P53582	METAP1		unknown	NUCLEUS
P53597	SUCLG1		Mitochondria	MITOCHONDRIA
P53602	MVD	CYTOSOL	Cytosol	CYTOSOL
P53618	COPB1		Cytosol	CYTOSOL
P53621	COPA		Cytosol	CYTOSOL
P53634	CTSC	LYSOSOME	Lysosome	LYSOSOME
P53680	AP2S1		unknown	LYSOSOME
P53701	HCCS		Mitochondria	MITOCHONDRIA
P53801	PTTG1IP		Lysosome	PLASMA MEMBRANE
P53990-2	IST1		Cytosol	CYTOSOL
P53992	SEC24C		unknown	GOLGI APPARATUS
P53999	SUB1		Nucleus	NUCLEUS
P54098	POLG	MITOCHONDRIA	Mitochondria	MITOCHONDRIA
P54105				CYTOSOL
P54136	RARS		Cytosol	CYTOSOL
P54577	YARS		Cytosol	NUCLEUS
P54687				CYTOSOL
P54709	ATP1B3		Lysosome	PLASMA MEMBRANE
P54762	EPHB1		Plasma Membrane	PLASMA MEMBRANE
P54803				LYSOSOME
P54819-2	AK2		Mitochondria	MITOCHONDRIA
P54920	NAPA		Cytosol	CYTOSOL
P55010	EIF5		Cytosol	CYTOSOL
P55011	SLC12A2		Lysosome	LYSOSOME
P55036	PSMD4		Cytosol	CYTOSOL
P55060	CSE1L		Cytosol	CYTOSOL
P55072	VCP		unknown	CYTOSOL
P55082	MFAP3	PLASMA MEMBRANE	Plasma Membrane	PLASMA MEMBRANE
P55084	HADHB		Mitochondria	MITOCHONDRIA
P55145	MANF		Endoplasmic Reticulum	ENDOPLASMIC RETICULUM
P55160	NCKAP1L		unknown	PLASMA MEMBRANE
P55196-5	AFDN		Plasma Membrane	PLASMA MEMBRANE
P55199				NUCLEUS
P55209	NAP1L1		Cytosol	CYTOSOL
P55263				CYTOSOL
P55265				NUCLEOLUS
P55735	SEC13		unknown	NUCLEUS
P55769	SNU13	NUCLEOLUS	Nucleolus	NUCLEOLUS
P55786	NPEPPS		Cytosol	CYTOSOL
P55789	GFER		Mitochondria	MITOCHONDRIA
P55795				NUCLEUS
P55809	OXCT1	MITOCHONDRIA	Mitochondria	MITOCHONDRIA
P55884-2	EIF3B		Cytosol	CYTOSOL
P55899	FCGRT		Lysosome	LYSOSOME
P55957-2	BID		unknown	CYTOSOL
P56181-2	NDUFV3		Mitochondria	MITOCHONDRIA
P56182	RRP1	NUCLEOLUS	Nucleolus	NUCLEOLUS
P56192	MARS		Cytosol	CYTOSOL
P56270-2				CHROMATIN
P56377	AP1S2		unknown	CYTOSOL
P56378	MP68		Mitochondria	MITOCHONDRIA
P56381	ATP5E		Mitochondria	MITOCHONDRIA
P56385	ATP5I		Mitochondria	MITOCHONDRIA
P56537	EIF6		unknown	NUCLEUS
P56545-2				CYTOSOL
P56589	PEX3	PEROXISOME	Peroxisome	PEROXISOME
P56730	PRSS12		Endoplasmic Reticulum	ENDOPLASMIC RETICULUM
P56962	STX17		unknown	LYSOSOME
P57076				NUCLEUS
P57088	TMEM33		Endoplasmic Reticulum	ENDOPLASMIC RETICULUM
P57105	SYNJ2BP		Mitochondria	MITOCHONDRIA
P57737				PLASMA MEMBRANE
P57737-3				MITOCHONDRIA
P57740	NUP107		unknown	NUCLEUS
P57772	EEFSEC		Nucleus	NUCLEUS
P58335				PLASMA MEMBRANE
P59998-3	ARPC4		Cytosol	CYTOSOL
P60033	CD81		unknown	PLASMA MEMBRANE
P60174	TPI1		Cytosol	CYTOSOL
P60228	EIF3E		Cytosol	CYTOSOL
P60468	SEC61B		Endoplasmic Reticulum	ENDOPLASMIC RETICULUM
P60604	UBE2G2		Lysosome	ENDOPLASMIC RETICULUM
P60842	EIF4A1		Cytosol	CYTOSOL
P60866-2	RPS20	40S/60S RIBOSOME	40S/60S Ribosome	40S/60S RIBOSOME
P60891	PRPS1		Cytosol	CYTOSOL
P60953	CDC42		Cytosol	CYTOSOL
P60981	DSTN		Cytosol	CYTOSOL
P61006	RAB8A		Lysosome	LYSOSOME
P61009	SPCS3		Endoplasmic Reticulum	ENDOPLASMIC RETICULUM
P61011	SRP54		Nucleus	NUCLEUS
P61018-2	RAB4B		unknown	LYSOSOME
P61019	RAB2A		unknown	GOLGI APPARATUS
P61020	RAB5B		unknown	LYSOSOME
P61026	RAB10		unknown	GOLGI APPARATUS
P61081	UBE2M	CYTOSOL	Cytosol	CYTOSOL
P61088	UBE2N		Cytosol	CYTOSOL
P61106	RAB14		unknown	LYSOSOME
P61158	ACTR3		unknown	NUCLEUS
P61160	ACTR2		Cytosol	CYTOSOL
P61163	ACTR1A		Cytosol	CYTOSOL
P61221	ABCE1		Nucleus	NUCLEUS
P61224	RAP1B		Lysosome	PLASMA MEMBRANE
P61247	RPS3A	40S/60S RIBOSOME	40S/60S Ribosome	40S/60S RIBOSOME
P61313	RPL15	40S/60S RIBOSOME	40S/60S Ribosome	40S/60S RIBOSOME
P61353	RPL27	40S/60S RIBOSOME	40S/60S Ribosome	40S/60S RIBOSOME
P61421	ATP6V0D1		Lysosome	LYSOSOME
P61513	RPL37A	40S/60S RIBOSOME	40S/60S Ribosome	40S/60S RIBOSOME
P61586	RHOA		unknown	PLASMA MEMBRANE
P61604	HSPE1	MITOCHONDRIA	Mitochondria	MITOCHONDRIA
P61619	SEC61A1		Endoplasmic Reticulum	ENDOPLASMIC RETICULUM
P61626	LYZ	LYSOSOME	Lysosome	LYSOSOME
P61758	VBP1		Cytosol	CYTOSOL
P61769	B2M		unknown	PLASMA MEMBRANE
P61803	DAD1		Endoplasmic Reticulum	ENDOPLASMIC RETICULUM
P61916	NPC2		Lysosome	LYSOSOME
P61923-4	COPZ1		Cytosol	CYTOSOL
P61927	RPL37	40S/60S RIBOSOME	40S/60S Ribosome	40S/60S RIBOSOME
P61964	WDR5		Nucleus	NUCLEUS
P61981	YWHAG		Cytosol	CYTOSOL
P62070-4	RRAS2		Plasma Membrane	PLASMA MEMBRANE
P62072	TIMM10	MITOCHONDRIA	Mitochondria	MITOCHONDRIA
P62081	RPS7	40S/60S RIBOSOME	40S/60S Ribosome	40S/60S RIBOSOME
P62136	PPP1CA		Cytosol	CYTOSOL
P62158	CALM1		unknown	CYTOSOL
P62191	PSMC1		Cytosol	CYTOSOL
P62195	PSMC5		Cytosol	CYTOSOL
P62241	RPS8	40S/60S RIBOSOME	40S/60S Ribosome	40S/60S RIBOSOME
P62244	RPS15A	40S/60S RIBOSOME	40S/60S Ribosome	40S/60S RIBOSOME
P62249	RPS16	40S/60S RIBOSOME	40S/60S Ribosome	40S/60S RIBOSOME
P62258	YWHAE		Cytosol	CYTOSOL
P62263	RPS14	40S/60S RIBOSOME	40S/60S Ribosome	40S/60S RIBOSOME
P62266	RPS23	40S/60S RIBOSOME	40S/60S Ribosome	40S/60S RIBOSOME
P62269	RPS18	40S/60S RIBOSOME	40S/60S Ribosome	40S/60S RIBOSOME
P62273	RPS29	40S/60S RIBOSOME	40S/60S Ribosome	40S/60S RIBOSOME
P62277	RPS13	40S/60S RIBOSOME	40S/60S Ribosome	40S/60S RIBOSOME
P62280	RPS11	40S/60S RIBOSOME	40S/60S Ribosome	40S/60S RIBOSOME
P62310				CYTOSOL
P62316	SNRPD2		Nucleus	NUCLEUS
P62318	SNRPD3		Nucleus	NUCLEUS
P62330	ARF6		unknown	CYTOSOL
P62333	PSMC6		Cytosol	CYTOSOL
P62424	RPL7A	40S/60S RIBOSOME	40S/60S Ribosome	40S/60S RIBOSOME
P62495	ETF1		unknown	NUCLEUS
P62701	RPS4X	40S/60S RIBOSOME	40S/60S Ribosome	40S/60S RIBOSOME
P62750	RPL23A	40S/60S RIBOSOME	40S/60S Ribosome	40S/60S RIBOSOME
P62753	RPS6	40S/60S RIBOSOME	40S/60S Ribosome	40S/60S RIBOSOME
P62805	HIST1H4A	CHROMATIN	Chromatin	CHROMATIN
P62820	RAB1A		Lysosome	GOLGI APPARATUS
P62826	RAN		Cytosol	CYTOSOL
P62829	RPL23	40S/60S RIBOSOME	40S/60S Ribosome	40S/60S RIBOSOME
P62834	RAP1A		unknown	PLASMA MEMBRANE
P62841	RPS15	40S/60S RIBOSOME	40S/60S Ribosome	40S/60S RIBOSOME
P62847-4				40S/60S RIBOSOME
P62851	RPS25	40S/60S RIBOSOME	40S/60S Ribosome	40S/60S RIBOSOME
P62854	RPS26	40S/60S RIBOSOME	40S/60S Ribosome	40S/60S RIBOSOME
P62857	RPS28	40S/60S RIBOSOME	40S/60S Ribosome	40S/60S RIBOSOME
P62861	FAU	40S/60S RIBOSOME	40S/60S Ribosome	40S/60S RIBOSOME
P62873	GNB1		Plasma Membrane	PLASMA MEMBRANE
P62879	GNB2		Plasma Membrane	PLASMA MEMBRANE
P62888	RPL30	40S/60S RIBOSOME	40S/60S Ribosome	40S/60S RIBOSOME
P62899	RPL31	40S/60S RIBOSOME	40S/60S Ribosome	40S/60S RIBOSOME
P62906	RPL10A	40S/60S RIBOSOME	40S/60S Ribosome	40S/60S RIBOSOME
P62910	RPL32	40S/60S RIBOSOME	40S/60S Ribosome	40S/60S RIBOSOME
P62913	RPL11	40S/60S RIBOSOME	40S/60S Ribosome	40S/60S RIBOSOME
P62917	RPL8	40S/60S RIBOSOME	40S/60S Ribosome	40S/60S RIBOSOME
P62937	PPIA		Cytosol	CYTOSOL
P62979	RPS27A	40S/60S RIBOSOME	40S/60S Ribosome	40S/60S RIBOSOME
P62993	GRB2		Cytosol	CYTOSOL
P63000-2	RAC1		unknown	PLASMA MEMBRANE
P63010-2	AP2B1		Lysosome	LYSOSOME
P63027				PLASMA MEMBRANE
P63096				PLASMA MEMBRANE
P63104	YWHAZ		Cytosol	CYTOSOL
P63151-2	PPP2R2A		Cytosol	CYTOSOL
P63165	SUMO1		Nucleus	CHROMATIN
P63167	DYNLL1		Cytosol	NUCLEUS
P63173	RPL38	40S/60S RIBOSOME	40S/60S Ribosome	40S/60S RIBOSOME
P63208	SKP1		Cytosol	CYTOSOL
P63218	GNG5		Lysosome	PLASMA MEMBRANE
P63220	RPS21	40S/60S RIBOSOME	40S/60S Ribosome	40S/60S RIBOSOME
P63241-2				NUCLEUS
P63244	RACK1		unknown	NUCLEUS
P63279	UBE2I		unknown	NUCLEUS
P67809	YBX1		Nucleus	NUCLEUS
P67812-3	SEC11A		Lysosome	ENDOPLASMIC RETICULUM
P67870	CSNK2B		Cytosol	CYTOSOL
P67936	TPM4		Cytosol	CYTOSOL
P68032	ACTG2		Cytosol	CYTOSOL
P68036-3	UBE2L3		Cytosol	CYTOSOL
P68104	EEF1A1		Nucleus	CHROMATIN
P68366				CYTOSOL
P68371	TUBB4B		Cytosol	CYTOSOL
P68400	CSNK2A1		Cytosol	CYTOSOL
P69905	HBA1		Nucleus	CHROMATIN
P78316	NOP14	NUCLEOLUS	Nucleolus	NUCLEOLUS
P78324	SIRPB1		unknown	PLASMA MEMBRANE
P78332				NUCLEUS
P78347	GTF2I		Chromatin	CHROMATIN
P78356	PIP4K2B		Plasma Membrane	PLASMA MEMBRANE
P78368	CSNK1G2		Plasma Membrane	PLASMA MEMBRANE
P78371	CCT2		Cytosol	CYTOSOL
P78406	RAE1		Nucleus	NUCLEUS
P78417	GSTO1	CYTOSOL	Cytosol	CYTOSOL
P78527	PRKDC		Nucleus	CHROMATIN
P78536	ADAM17		Lysosome	PLASMA MEMBRANE
P80217-2	IFI35		Cytosol	CYTOSOL
P80303	NUCB2		unknown	ENDOPLASMIC RETICULUM
P80723	BASP1		unknown	CYTOSOL
P82094-2	TMF1		unknown	GOLGI APPARATUS
P82650	MRPS22	MITOCHONDRIA	Mitochondria	MITOCHONDRIA
P82663	MRPS25		Mitochondria	MITOCHONDRIA
P82673	MRPS35		Mitochondria	MITOCHONDRIA
P82675	MRPS5	MITOCHONDRIA	Mitochondria	MITOCHONDRIA
P82909	MRPS36		unknown	MITOCHONDRIA
P82912	MRPS11	MITOCHONDRIA	Mitochondria	MITOCHONDRIA
P82921	MRPS21		Mitochondria	MITOCHONDRIA
P82930	MRPS34		Mitochondria	MITOCHONDRIA
P82933	MRPS9		Mitochondria	MITOCHONDRIA
P82979	SARNP		Nucleus	CHROMATIN
P83111	LACTB		Mitochondria	MITOCHONDRIA
P83731	RPL24	40S/60S RIBOSOME	40S/60S Ribosome	40S/60S RIBOSOME
P83881	RPL36A	40S/60S RIBOSOME	40S/60S Ribosome	40S/60S RIBOSOME
P84077	ARF3		Cytosol	CYTOSOL
P84090	ERH		Nucleus	NUCLEUS
P84095	RHOG		Lysosome	PLASMA MEMBRANE
P84098	RPL19	40S/60S RIBOSOME	40S/60S Ribosome	40S/60S RIBOSOME
P84101	SERF2		unknown	CHROMATIN
P84103	SRSF3		Nucleus	NUCLEUS
P84157				GOLGI APPARATUS
P85037	FOXK1		unknown	CHROMATIN
P86790	CCZ1B	LYSOSOME	Lysosome	LYSOSOME
P98082	DAB2		Lysosome	LYSOSOME
P98155-2	VLDLR		Lysosome	LYSOSOME
P98160	HSPG2		Endoplasmic Reticulum	ENDOPLASMIC RETICULUM
P98171-2	ARHGAP4		unknown	CHROMATIN
P98175-3	RBM10		Nucleus	NUCLEOLUS
P98179	RBM3		Nucleus	NUCLEUS
P98194-7	ATP2C1	GOLGI APPARATUS	Golgi Apparatus	GOLGI APPARATUS
P98196	ATP11A		Lysosome	PLASMA MEMBRANE
P99999	CYCS		Mitochondria	MITOCHONDRIA
Q00013	MPP1		Lysosome	PLASMA MEMBRANE
Q00059	TFAM		Mitochondria	MITOCHONDRIA
Q00325-2	SLC25A3	MITOCHONDRIA	Mitochondria	MITOCHONDRIA
Q00341	HDLBP		unknown	40S/60S RIBOSOME
Q00403				NUCLEUS
Q00534	CDK6		Cytosol	CYTOSOL
Q00535	CDK5		unknown	CYTOSOL
Q00577	PURA		Cytosol	CYTOSOL
Q00610	CLTC		unknown	CYTOSOL
Q00653				CYTOSOL
Q00688	FKBP3		40S/60S Ribosome	40S/60S RIBOSOME
Q00765	REEP5	ENDOPLASMIC RETICULUM	Endoplasmic Reticulum	ENDOPLASMIC RETICULUM
Q00796	SORD		Nucleus	NUCLEUS
Q00839	HNRNPU	NUCLEUS	Nucleus	NUCLEUS
Q00839-2	HNRNPU		Nucleus	NUCLEUS
Q01081	U2AF1L4	NUCLEUS	Nucleus	NUCLEUS
Q01082	SPTBN1		Plasma Membrane	PLASMA MEMBRANE
Q01082-3	SPTBN1		Plasma Membrane	PLASMA MEMBRANE
Q01105-2				CYTOSOL
Q01130				NUCLEUS
Q01196-8	RUNX1		Chromatin	CHROMATIN
Q01433	AMPD2	CYTOSOL	Cytosol	CYTOSOL
Q01459	CTBS	LYSOSOME	Lysosome	LYSOSOME
Q01469	FABP5		Cytosol	CYTOSOL
Q01518	CAP1		unknown	NUCLEUS
Q01581	HMGCS1	CYTOSOL	Cytosol	CYTOSOL
Q01650	SLC7A5		unknown	PLASMA MEMBRANE
Q01780	EXOSC10		Nucleus	NUCLEOLUS
Q01813	PFKP		unknown	CYTOSOL
Q01826-2	SATB1	CHROMATIN	Chromatin	CHROMATIN
Q01844-5	EWSR1		unknown	NUCLEUS
Q01968	OCRL		unknown	LYSOSOME
Q01970	PLCB3		Plasma Membrane	PLASMA MEMBRANE
Q02040	AKAP17A	NUCLEUS	Nucleus	NUCLEOLUS
Q02127	DHODH	MITOCHONDRIA	Mitochondria	MITOCHONDRIA
Q02218	OGDH	MITOCHONDRIA	Mitochondria	MITOCHONDRIA
Q02241	KIF23		unknown	CHROMATIN
Q02252	ALDH6A1	MITOCHONDRIA	Mitochondria	MITOCHONDRIA
Q02338	BDH1		unknown	MITOCHONDRIA
Q02543	RPL18A	40S/60S RIBOSOME	40S/60S Ribosome	40S/60S RIBOSOME
Q02556	IRF8		unknown	NUCLEUS
Q02790	FKBP4		Cytosol	CYTOSOL
Q02809-2	PLOD1		Endoplasmic Reticulum	ENDOPLASMIC RETICULUM
Q02818	NUCB1		unknown	GOLGI APPARATUS
Q02878	RPL6	40S/60S RIBOSOME	40S/60S Ribosome	40S/60S RIBOSOME
Q02880-2	TOP2B		Chromatin	CHROMATIN
Q02978	SLC25A11		Mitochondria	MITOCHONDRIA
Q03164-3				CHROMATIN
Q03169	TNFAIP2		unknown	NUCLEUS
Q03188	CENPC		Chromatin	CHROMATIN
Q03252	LMNB2		Chromatin	CHROMATIN
Q03405	PLAUR	PLASMA MEMBRANE	Plasma Membrane	PLASMA MEMBRANE
Q03426	MVK		Cytosol	CYTOSOL
Q03518	TAP1		Endoplasmic Reticulum	ENDOPLASMIC RETICULUM
Q03519	TAP2	ENDOPLASMIC RETICULUM	Endoplasmic Reticulum	ENDOPLASMIC RETICULUM
Q03701	CEBPZ		Nucleus	NUCLEOLUS
Q04206	RELA		Cytosol	CYTOSOL
Q04323-2	UBXN1		Cytosol	CYTOSOL
Q04446	GBE1	CYTOSOL	Cytosol	CYTOSOL
Q04721	NOTCH2		unknown	GOLGI APPARATUS
Q04726				NUCLEUS
Q04759	PRKCQ		unknown	PLASMA MEMBRANE
Q04760	GLO1	CYTOSOL	Cytosol	CYTOSOL
Q04837	SSBP1		Mitochondria	MITOCHONDRIA
Q04864				CYTOSOL
Q04917	YWHAH		Cytosol	CYTOSOL
Q04941	PLP2		unknown	PLASMA MEMBRANE
Q05193	DNM1		unknown	NUCLEUS
Q05209	PTPN12		Cytosol	CYTOSOL
Q05519				NUCLEUS
Q05639	EEF1A2	NUCLEUS	Nucleus	CHROMATIN
Q05655	PRKCD		unknown	CYTOSOL
Q05823				NUCLEUS
Q05D32	CTDSPL2		Chromatin	CHROMATIN
Q06055-2	ATP5G1		unknown	MITOCHONDRIA
Q06124-2	PTPN11		Cytosol	CYTOSOL
Q06136	KDSR		Endoplasmic Reticulum	ENDOPLASMIC RETICULUM
Q06187-2	BTK		Cytosol	CYTOSOL
Q06210	GFPT1		Cytosol	NUCLEUS
Q06323	PSME1		Cytosol	CYTOSOL
Q06481	APLP2		Lysosome	PLASMA MEMBRANE
Q06587				CHROMATIN
Q06787-2				40S/60S RIBOSOME
Q06787-8				NUCLEOLUS
Q06830	PRDX1		unknown	CYTOSOL
Q07020	RPL18	40S/60S RIBOSOME	40S/60S Ribosome	40S/60S RIBOSOME
Q07021	C1QBP		Mitochondria	MITOCHONDRIA
Q07065	CKAP4		Endoplasmic Reticulum	ENDOPLASMIC RETICULUM
Q07666	KHDRBS1		unknown	CHROMATIN
Q07812-2	BAX		unknown	MITOCHONDRIA
Q07820	MCL1		unknown	GOLGI APPARATUS
Q07954	LRP1		Lysosome	LYSOSOME
Q07955	SRSF1		Nucleus	NUCLEUS
Q07960	ARHGAP1		Cytosol	CYTOSOL
Q08209-2	PPP3CA		unknown	CYTOSOL
Q08211	DHX9		Nucleus	NUCLEUS
Q08257				CYTOSOL
Q08334	IL10RB	PLASMA MEMBRANE	Plasma Membrane	PLASMA MEMBRANE
Q08357	SLC20A2		Lysosome	LYSOSOME
Q08378	GOLGA3		Cytosol	CYTOSOL
Q08379	GOLGA2		Nucleus	CHROMATIN
Q08380	LGALS3BP		Lysosome	LYSOSOME
Q08426	EHHADH	PEROXISOME	Peroxisome	PEROXISOME
Q08722	CD47		Lysosome	PLASMA MEMBRANE
Q08752	PPID		Cytosol	CYTOSOL
Q08945	SSRP1		Nucleus	NUCLEUS
Q08AM6	VAC14		unknown	NUCLEOLUS
Q08ET2				PLASMA MEMBRANE
Q08J23	NSUN2		Cytosol	CYTOSOL
Q09028	RBBP4		unknown	NUCLEUS
Q09161	NCBP1		Nucleus	NUCLEUS
Q09328	MGAT5		unknown	PLASMA MEMBRANE
Q09472	EP300		unknown	CHROMATIN
Q09666	AHNAK		unknown	GOLGI APPARATUS
Q0JRZ9	FCHO2		unknown	PLASMA MEMBRANE
Q0VD83-4	APOBR		unknown	CYTOSOL
Q0VDF9	HSPA14		unknown	NUCLEUS
Q10469	MGAT2	GOLGI APPARATUS	Golgi Apparatus	GOLGI APPARATUS
Q10471	GALNT2	GOLGI APPARATUS	Golgi Apparatus	GOLGI APPARATUS
Q10472	GALNT1	GOLGI APPARATUS	Golgi Apparatus	GOLGI APPARATUS
Q10570	CPSF1	NUCLEUS	Nucleus	NUCLEUS
Q10588	BST1	PLASMA MEMBRANE	Plasma Membrane	PLASMA MEMBRANE
Q10589	BST2		Lysosome	PLASMA MEMBRANE
Q10713	PMPCA	MITOCHONDRIA	Mitochondria	MITOCHONDRIA
Q11201	ST3GAL1	GOLGI APPARATUS	Golgi Apparatus	GOLGI APPARATUS
Q12768	KIAA0196		unknown	LYSOSOME
Q12769	NUP160		Cytosol	NUCLEUS
Q12770	SCAP		Endoplasmic Reticulum	ENDOPLASMIC RETICULUM
Q12772	SREBF2		Endoplasmic Reticulum	ENDOPLASMIC RETICULUM
Q12788	TBL3	NUCLEOLUS	Nucleolus	NUCLEOLUS
Q12797	ASPH	ENDOPLASMIC RETICULUM	Endoplasmic Reticulum	ENDOPLASMIC RETICULUM
Q12830	BPTF	CHROMATIN	Chromatin	CHROMATIN
Q12834	CDC20		Chromatin	CHROMATIN
Q12846	STX4		Lysosome	PLASMA MEMBRANE
Q12849	GRSF1	MITOCHONDRIA	Mitochondria	MITOCHONDRIA
Q12874	SF3A3	NUCLEUS	Nucleus	NUCLEUS
Q12882	DPYD	CYTOSOL	Cytosol	CYTOSOL
Q12904-2	AIMP1		unknown	CYTOSOL
Q12905	ILF2		Nucleus	NUCLEUS
Q12906-7	ILF3		Nucleus	NUCLEUS
Q12907	LMAN2		Endoplasmic Reticulum	ENDOPLASMIC RETICULUM
Q12912	LRMP		Endoplasmic Reticulum	ENDOPLASMIC RETICULUM
Q12913	PTPRJ	PLASMA MEMBRANE	Plasma Membrane	PLASMA MEMBRANE
Q12931	TRAP1	MITOCHONDRIA	Mitochondria	MITOCHONDRIA
Q12933-2	TRAF2		Nucleus	CYTOSOL
Q12959-2				PLASMA MEMBRANE
Q12962				NUCLEUS
Q12965	MYO1E		unknown	PLASMA MEMBRANE
Q12972				NUCLEUS
Q12979	ABR		unknown	PLASMA MEMBRANE
Q12981	BNIP1		Endoplasmic Reticulum	ENDOPLASMIC RETICULUM
Q12986	NFX1		Nucleus	NUCLEOLUS
Q12996	CSTF3	NUCLEUS	Nucleus	NUCLEUS
Q13011	ECH1		Mitochondria	MITOCHONDRIA
Q13043	STK4		Cytosol	CYTOSOL
Q13057-2	COASY		unknown	CYTOSOL
Q13084	MRPL28	MITOCHONDRIA	Mitochondria	MITOCHONDRIA
Q13085-4	ACACA		Cytosol	CYTOSOL
Q13094	LCP2		unknown	CYTOSOL
Q13098-7	GPS1		Cytosol	CYTOSOL
Q13107	USP4		Cytosol	CYTOSOL
Q13111				CHROMATIN
Q13123	IK		Nucleus	NUCLEOLUS
Q13129	RLF		Chromatin	CHROMATIN
Q13131-2	PRKAA1		Cytosol	CYTOSOL
Q13136	PPFIA1		unknown	PLASMA MEMBRANE
Q13137-4	CALCOCO2		unknown	CYTOSOL
Q13144	EIF2B5		Cytosol	CYTOSOL
Q13148	TARDBP		Cytosol	NUCLEUS
Q13151	HNRNPA0	NUCLEUS	Nucleus	CHROMATIN
Q13155	AIMP2		Cytosol	CYTOSOL
Q13162	PRDX4		Endoplasmic Reticulum	ENDOPLASMIC RETICULUM
Q13177	PAK2		Cytosol	CYTOSOL
Q13185	CBX3	NUCLEUS	Nucleus	NUCLEUS
Q13190	STX5		unknown	GOLGI APPARATUS
Q13200	PSMD2		Cytosol	CYTOSOL
Q13206	DDX10		Nucleus	NUCLEOLUS
Q13217	DNAJC3		Endoplasmic Reticulum	ENDOPLASMIC RETICULUM
Q13232	NME3		unknown	40S/60S RIBOSOME
Q13233				PLASMA MEMBRANE
Q13242	SRSF9	NUCLEUS	Nucleus	NUCLEUS
Q13243	SRSF5		unknown	NUCLEUS
Q13247	SRSF6		Nucleus	NUCLEUS
Q13263	TRIM28	NUCLEUS	Nucleus	NUCLEUS
Q13277	STX3		Lysosome	PLASMA MEMBRANE
Q13283	G3BP1		Nucleus	CHROMATIN
Q13287	NMI		unknown	NUCLEUS
Q13310-3	PABPC4		Nucleus	NUCLEUS
Q13315	ATM		Chromatin	CHROMATIN
Q13347	EIF3I		Cytosol	CYTOSOL
Q13362-4				PLASMA MEMBRANE
Q13370	PDE3B		Endoplasmic Reticulum	ENDOPLASMIC RETICULUM
Q13393	PLD1		Lysosome	LYSOSOME
Q13405	MRPL49		Mitochondria	MITOCHONDRIA
Q13409-3				CHROMATIN
Q13418	ILK		unknown	PLASMA MEMBRANE
Q13423	NNT	MITOCHONDRIA	Mitochondria	MITOCHONDRIA
Q13425	SNTB2		Lysosome	PLASMA MEMBRANE
Q13427	PPIG	NUCLEUS	Nucleus	CHROMATIN
Q13428-4	TCOF1		unknown	GOLGI APPARATUS
Q13433				PLASMA MEMBRANE
Q13435	SF3B2	NUCLEUS	Nucleus	NUCLEUS
Q13442	PDAP1		unknown	CYTOSOL
Q13443	ADAM9		Plasma Membrane	PLASMA MEMBRANE
Q13444				PLASMA MEMBRANE
Q13451	FKBP5		Cytosol	CYTOSOL
Q13459	MYO9B		Chromatin	PLASMA MEMBRANE
Q13464	ROCK1		unknown	PLASMA MEMBRANE
Q13472				MITOCHONDRIA
Q13488	TCIRG1		Lysosome	LYSOSOME
Q13492	PICALM		unknown	GOLGI APPARATUS
Q13496	MTM1		unknown	PLASMA MEMBRANE
Q13501	SQSTM1		unknown	PLASMA MEMBRANE
Q13505	MTX1		Mitochondria	MITOCHONDRIA
Q13510-2	ASAH1	LYSOSOME	Lysosome	LYSOSOME
Q13526	PIN1		unknown	CYTOSOL
Q13547	HDAC1		Cytosol	NUCLEUS
Q13557-8	CAMK2D		unknown	NUCLEUS
Q13561-2	DCTN2		Cytosol	CYTOSOL
Q13563	PKD2		Lysosome	PLASMA MEMBRANE
Q13568				CHROMATIN
Q13573	SNW1		Nucleus	NUCLEOLUS
Q13576				PLASMA MEMBRANE
Q13586	STIM1		Endoplasmic Reticulum	ENDOPLASMIC RETICULUM
Q13596	SNX1		Cytosol	CYTOSOL
Q13601	KRR1		unknown	NUCLEOLUS
Q13616	CUL1		unknown	NUCLEUS
Q13617-2	CUL2		Cytosol	CYTOSOL
Q13618	CUL3		Nucleus	CYTOSOL
Q13619	CUL4A		unknown	NUCLEUS
Q13620				NUCLEUS
Q13627-2	DYRK1A		Nucleus	NUCLEOLUS
Q13630	TSTA3	CYTOSOL	Cytosol	CYTOSOL
Q13636	RAB31		Lysosome	GOLGI APPARATUS
Q13637	RAB32		unknown	CYTOSOL
Q13641	TPBG	PLASMA MEMBRANE	Plasma Membrane	PLASMA MEMBRANE
Q13671	RIN1		unknown	CYTOSOL
Q13683				PLASMA MEMBRANE
Q13724	MOGS	ENDOPLASMIC RETICULUM	Endoplasmic Reticulum	ENDOPLASMIC RETICULUM
Q13740-2	ALCAM	PLASMA MEMBRANE	Plasma Membrane	PLASMA MEMBRANE
Q13769	THOC5	NUCLEUS	Nucleus	NUCLEOLUS
Q13823	GNL2		Nucleus	NUCLEOLUS
Q13838-2	DDX39B		Nucleus	NUCLEUS
Q13868				NUCLEUS
Q13884	SNTB1		Lysosome	PLASMA MEMBRANE
Q13895	BYSL	NUCLEOLUS	Nucleolus	NUCLEOLUS
Q13905-3				PLASMA MEMBRANE
Q13907	IDI1		Cytosol	CYTOSOL
Q13948				GOLGI APPARATUS
Q13951				NUCLEUS
Q14005				PLASMA MEMBRANE
Q14008-3	CKAP5		Chromatin	CHROMATIN
Q14011	CIRBP		Nucleus	NUCLEUS
Q14019	COTL1		Cytosol	CYTOSOL
Q14055	COL9A2		Nucleus	CHROMATIN
Q14088	RAB33A		unknown	GOLGI APPARATUS
Q14108	SCARB2	LYSOSOME	Lysosome	LYSOSOME
Q14118	DAG1		Lysosome	PLASMA MEMBRANE
Q14126	DSG2	PLASMA MEMBRANE	Plasma Membrane	PLASMA MEMBRANE
Q14135-4				NUCLEUS
Q14137	BOP1.00	NUCLEOLUS	Nucleolus	NUCLEOLUS
Q14139-2	UBE4A		Cytosol	CYTOSOL
Q14141	2006-09-01		Chromatin	CHROMATIN
Q14145				CYTOSOL
Q14149	MORC3		unknown	CHROMATIN
Q14152	EIF3A		Cytosol	CYTOSOL
Q14155-5	ARHGEF7		unknown	NUCLEUS
Q14156	EFR3A		unknown	PLASMA MEMBRANE
Q14157-5	UBAP2L		Nucleus	CHROMATIN
Q14161	GIT2		unknown	CYTOSOL
Q14165	MLEC		Endoplasmic Reticulum	ENDOPLASMIC RETICULUM
Q14166	TTLL12		Cytosol	CYTOSOL
Q14168-4	MPP2		Lysosome	PLASMA MEMBRANE
Q14192	FHL2		unknown	CYTOSOL
Q14197	MRPL58		Mitochondria	MITOCHONDRIA
Q14203	DCTN1		Cytosol	CYTOSOL
Q14204	DYNC1H1		unknown	CHROMATIN
Q14240-2	EIF4A2		Cytosol	NUCLEUS
Q14241	TCEB3		Chromatin	CHROMATIN
Q14249	ENDOG		Mitochondria	MITOCHONDRIA
Q14254	FLOT2		Lysosome	PLASMA MEMBRANE
Q14257-2	RCN2		Endoplasmic Reticulum	ENDOPLASMIC RETICULUM
Q14258	TRIM25		unknown	40S/60S RIBOSOME
Q14289-2	PTK2B		Cytosol	CYTOSOL
Q14331	FRG1		unknown	CHROMATIN
Q14344	GNA13		Lysosome	PLASMA MEMBRANE
Q14376				CYTOSOL
Q14393	GAS6		Endoplasmic Reticulum	ENDOPLASMIC RETICULUM
Q14444	CAPRIN1		Nucleus	NUCLEOLUS
Q14493	SLBP		unknown	NUCLEUS
Q14498	RBM39	NUCLEUS	Nucleus	NUCLEUS
Q14517	FAT1		unknown	PLASMA MEMBRANE
Q14554	PDIA5		Endoplasmic Reticulum	ENDOPLASMIC RETICULUM
Q14566	MCM6		Cytosol	NUCLEUS
Q14573	ITPR3		unknown	ENDOPLASMIC RETICULUM
Q14644				PLASMA MEMBRANE
Q14667	KIAA0100		Endoplasmic Reticulum	ENDOPLASMIC RETICULUM
Q14677	CLINT1		unknown	CHROMATIN
Q14683	SMC1A	CHROMATIN	Chromatin	CHROMATIN
Q14689				PLASMA MEMBRANE
Q14690	PDCD11	NUCLEOLUS	Nucleolus	NUCLEOLUS
Q14692				NUCLEOLUS
Q14694-2	USP10		Nucleus	NUCLEUS
Q14696	MESDC2		Endoplasmic Reticulum	40S/60S RIBOSOME
Q14697-2				ENDOPLASMIC RETICULUM
Q14699	RFTN1	PLASMA MEMBRANE	Plasma Membrane	PLASMA MEMBRANE
Q14738				CYTOSOL
Q14739	LBR		Endoplasmic Reticulum	ENDOPLASMIC RETICULUM
Q14746				CYTOSOL
Q14764	MVP		unknown	NUCLEOLUS
Q14814-4	MEF2D	CHROMATIN	Chromatin	CHROMATIN
Q14839-2	CHD4	CHROMATIN	Chromatin	CHROMATIN
Q14847	LASP1		unknown	PLASMA MEMBRANE
Q14914	PTGR1		Cytosol	CYTOSOL
Q14956	GPNMB		unknown	GOLGI APPARATUS
Q14966	ZNF638		unknown	CHROMATIN
Q14974	KPNB1		Cytosol	CYTOSOL
Q14BN4	SLMAP		Endoplasmic Reticulum	ENDOPLASMIC RETICULUM
Q14C86-6	GAPVD1		Cytosol	CYTOSOL
Q15003	NCAPH		unknown	CHROMATIN
Q15004				CHROMATIN
Q15005	SPCS2	ENDOPLASMIC RETICULUM	Endoplasmic Reticulum	ENDOPLASMIC RETICULUM
Q15006	EMC2		Endoplasmic Reticulum	ENDOPLASMIC RETICULUM
Q15007	WTAP		Nucleus	NUCLEUS
Q15008	PSMD6		Cytosol	CYTOSOL
Q15011	HERPUD1		Endoplasmic Reticulum	ENDOPLASMIC RETICULUM
Q15014				CHROMATIN
Q15018	FAM175B		Cytosol	CYTOSOL
Q15019				GOLGI APPARATUS
Q15020				CYTOSOL
Q15021	NCAPD2	CHROMATIN	Chromatin	CHROMATIN
Q15022	SUZ12		Chromatin	CHROMATIN
Q15024	EXOSC7		Nucleus	NUCLEUS
Q15029	EFTUD2	NUCLEUS	Nucleus	NUCLEUS
Q15031	LARS2		Mitochondria	MITOCHONDRIA
Q15032-3				NUCLEUS
Q15035	TRAM2		Endoplasmic Reticulum	ENDOPLASMIC RETICULUM
Q15036				CYTOSOL
Q15042	RAB3GAP1		Cytosol	CYTOSOL
Q15043	SLC39A14		unknown	PLASMA MEMBRANE
Q15046-2	KARS		Cytosol	CYTOSOL
Q15047				NUCLEUS
Q15050	RRS1	NUCLEOLUS	Nucleolus	NUCLEOLUS
Q15052	ARHGEF6		Cytosol	CYTOSOL
Q15056-2				CYTOSOL
Q15057	ACAP2		unknown	CYTOSOL
Q15059	BRD3	CHROMATIN	Chromatin	CHROMATIN
Q15061	WDR43	NUCLEOLUS	Nucleolus	NUCLEOLUS
Q15067-2	ACOX1	PEROXISOME	Peroxisome	PEROXISOME
Q15070	OXA1L	MITOCHONDRIA	Mitochondria	MITOCHONDRIA
Q15075	EEA1		Cytosol	CYTOSOL
Q15080	NCF4		Cytosol	CYTOSOL
Q15084-2	PDIA6		Endoplasmic Reticulum	ENDOPLASMIC RETICULUM
Q15102	PAFAH1B3	CYTOSOL	Cytosol	CYTOSOL
Q15118	PDK1	MITOCHONDRIA	Mitochondria	MITOCHONDRIA
Q15120-2	PDK3		Mitochondria	MITOCHONDRIA
Q15126				CYTOSOL
Q15149				NUCLEOLUS
Q15154	PCM1		Nucleus	NUCLEOLUS
Q15165	PON2		Endoplasmic Reticulum	ENDOPLASMIC RETICULUM
Q15181	PPA1	CYTOSOL	Cytosol	CYTOSOL
Q15185	PTGES3		Cytosol	CYTOSOL
Q15233	NONO	NUCLEUS	Nucleus	CHROMATIN
Q15262-3	PTPRK	PLASMA MEMBRANE	Plasma Membrane	PLASMA MEMBRANE
Q15274	QPRT	CYTOSOL	Cytosol	CYTOSOL
Q15286	RAB35		unknown	PLASMA MEMBRANE
Q15287	RNPS1		Nucleus	NUCLEUS
Q15291				NUCLEUS
Q15293	RCN1		Endoplasmic Reticulum	ENDOPLASMIC RETICULUM
Q15311	RALBP1		unknown	PLASMA MEMBRANE
Q15334				PLASMA MEMBRANE
Q15363	TMED2		Endoplasmic Reticulum	ENDOPLASMIC RETICULUM
Q15365	PCBP1		Cytosol	NUCLEUS
Q15369	TCEB1		Cytosol	CYTOSOL
Q15382	RHEB		Cytosol	CYTOSOL
Q15392	DHCR24		unknown	ENDOPLASMIC RETICULUM
Q15393	SF3B3	NUCLEUS	Nucleus	NUCLEUS
Q15397	PUM3	NUCLEUS	Nucleus	NUCLEUS
Q15404	RSU1		unknown	CYTOSOL
Q15418-2	RPS6KA1		unknown	CYTOSOL
Q15424-3	SAFB		Nucleus	NUCLEOLUS
Q15428	SF3A2	NUCLEUS	Nucleus	NUCLEUS
Q15435	PPP1R7		Cytosol	CYTOSOL
Q15436	SEC23A		unknown	GOLGI APPARATUS
Q15437	SEC23B		unknown	GOLGI APPARATUS
Q15459	SF3A1	NUCLEUS	Nucleus	NUCLEUS
Q15477	SKIV2L		Nucleus	NUCLEOLUS
Q15528	MED22		unknown	NUCLEUS
Q15582	TGFBI		Lysosome	GOLGI APPARATUS
Q15596				CYTOSOL
Q15599	SLC9A3R2		unknown	PLASMA MEMBRANE
Q15629	TRAM1		Endoplasmic Reticulum	ENDOPLASMIC RETICULUM
Q15642	TRIP10		Cytosol	CYTOSOL
Q15650	TRIP4		Nucleus	NUCLEUS
Q15652	JMJD1C	CHROMATIN	Chromatin	CHROMATIN
Q15654	TRIP6		unknown	CYTOSOL
Q15691	MAPRE1		Cytosol	CYTOSOL
Q15717-2	ELAVL1		Nucleus	NUCLEUS
Q15738	NSDHL	ENDOPLASMIC RETICULUM	Endoplasmic Reticulum	ENDOPLASMIC RETICULUM
Q15750				CYTOSOL
Q15758	SLC1A5	PLASMA MEMBRANE	Plasma Membrane	PLASMA MEMBRANE
Q15785	TOMM34		unknown	CHROMATIN
Q15811				PLASMA MEMBRANE
Q15813				CYTOSOL
Q15818	NPTX1		Endoplasmic Reticulum	LYSOSOME
Q15819				CYTOSOL
Q15831				CYTOSOL
Q15833	STXBP2		Cytosol	CYTOSOL
Q15836	VAMP3		Lysosome	PLASMA MEMBRANE
Q15843	NEDD8		unknown	PLASMA MEMBRANE
Q15904	ATP6AP1		unknown	LYSOSOME
Q15910-2	EZH2	CHROMATIN	Chromatin	CHROMATIN
Q15942	ZYX		unknown	PLASMA MEMBRANE
Q16134	ETFDH	MITOCHONDRIA	Mitochondria	MITOCHONDRIA
Q16186	ADRM1		unknown	CYTOSOL
Q16204				CYTOSOL
Q16254				CHROMATIN
[truncated: 1,883 more rows]

## Sheet: Predictions(LPS)
Accession/UniprotID	Genes	MarkerCompartment	MainCompartment_Mulvey_et_al	MainCompartment_CCMPS
A0A0B4J2F0				GOLGI APPARATUS
A0AVT1	UBA6		Cytosol	CYTOSOL
A0FGR8-2	ESYT2		Endoplasmic Reticulum	ENDOPLASMIC RETICULUM
A0JNW5	UHRF1BP1L		Plasma Membrane	CYTOSOL
A0MZ66-3	SHTN1		Cytosol	CYTOSOL
A0PJW6				MITOCHONDRIA
A1L0T0	ILVBL		Endoplasmic Reticulum	ENDOPLASMIC RETICULUM
A2A288				40S/60S RIBOSOME
A2RRP1	NBAS		Endoplasmic Reticulum	ENDOPLASMIC RETICULUM
A2RUS2	DENND3		Nucleus	NUCLEUS
A2VDJ0-5	KIAA0922		Endoplasmic Reticulum	ENDOPLASMIC RETICULUM
A3KMH1	VWA8	MITOCHONDRIA	Mitochondria	MITOCHONDRIA
A4D1E9	GTPBP10		Mitochondria	MITOCHONDRIA
A4D1P6	WDR91		unknown	CYTOSOL
A4D1S0				PLASMA MEMBRANE
A5D8V6				PLASMA MEMBRANE
A5PLL7				ENDOPLASMIC RETICULUM
A5PLN9-5				PLASMA MEMBRANE
A5YKK6	CNOT1		40S/60S Ribosome	40S/60S RIBOSOME
A6NC98	CCDC88B		Cytosol	CYTOSOL
A6NDG6	PGP	CYTOSOL	Cytosol	CYTOSOL
A6NEE1				LYSOSOME
A6NHR9	SMCHD1	CHROMATIN	Chromatin	CHROMATIN
A6NJ78	METTL15		Mitochondria	MITOCHONDRIA
A8MVS5	HIDE1		Plasma Membrane	PLASMA MEMBRANE
A8MXV4	NUDT19	PEROXISOME	Peroxisome	MITOCHONDRIA
B0I1T2	MYO1G	PLASMA MEMBRANE	Plasma Membrane	PLASMA MEMBRANE
B2RUZ4				PLASMA MEMBRANE
C9J798				PLASMA MEMBRANE
C9JLW8	MCRIP1	NUCLEUS	Nucleus	40S/60S RIBOSOME
O00115	DNASE2	LYSOSOME	Lysosome	LYSOSOME
O00116	AGPS	PEROXISOME	Peroxisome	PEROXISOME
O00142	TK2		unknown	MITOCHONDRIA
O00148	DDX39A		Nucleus	NUCLEUS
O00151	PDLIM1		Plasma Membrane	PLASMA MEMBRANE
O00154				CYTOSOL
O00159-3	MYO1C		Lysosome	PLASMA MEMBRANE
O00160	MYO1F		Cytosol	CYTOSOL
O00161	SNAP23	PLASMA MEMBRANE	Plasma Membrane	PLASMA MEMBRANE
O00165-2	HAX1		Mitochondria	MITOCHONDRIA
O00170	AIP		Cytosol	CYTOSOL
O00178	GTPBP1		Nucleus	NUCLEUS
O00182	LGALS9		Plasma Membrane	PLASMA MEMBRANE
O00186	STXBP3		Lysosome	LYSOSOME
O00193	SMAP		Cytosol	CYTOSOL
O00203	AP3B1		Cytosol	CYTOSOL
O00214-2	LGALS8		unknown	PLASMA MEMBRANE
O00217	NDUFS8		unknown	MITOCHONDRIA
O00231-2	PSMD11		Cytosol	CYTOSOL
O00232	PSMD12		Cytosol	CYTOSOL
O00233				CYTOSOL
O00241	SIRPB1		Plasma Membrane	PLASMA MEMBRANE
O00264	PGRMC1	ENDOPLASMIC RETICULUM	Endoplasmic Reticulum	ENDOPLASMIC RETICULUM
O00268				CHROMATIN
O00291	HIP1		unknown	PLASMA MEMBRANE
O00299	CLIC1		Cytosol	CYTOSOL
O00303	EIF3F		Nucleus	NUCLEUS
O00308	WWP2		unknown	PLASMA MEMBRANE
O00329	PIK3CD		unknown	NUCLEUS
O00330	PDHX	MITOCHONDRIA	Mitochondria	MITOCHONDRIA
O00391	QSOX1	GOLGI APPARATUS	Golgi Apparatus	GOLGI APPARATUS
O00400	SLC33A1	ENDOPLASMIC RETICULUM	Endoplasmic Reticulum	ENDOPLASMIC RETICULUM
O00410-3	IPO5		unknown	CYTOSOL
O00411	POLRMT	MITOCHONDRIA	Mitochondria	MITOCHONDRIA
O00422	SAP18		Nucleus	NUCLEOLUS
O00442-2	RTCA		unknown	CYTOSOL
O00443	PIK3C2A		unknown	LYSOSOME
O00453				PLASMA MEMBRANE
O00461	GOLIM4	GOLGI APPARATUS	Golgi Apparatus	ENDOPLASMIC RETICULUM
O00462				LYSOSOME
O00468	AGRN		Endoplasmic Reticulum	GOLGI APPARATUS
O00469-2				ENDOPLASMIC RETICULUM
O00471	EXOC5		Lysosome	LYSOSOME
O00479				CHROMATIN
O00483	NDUFA4	MITOCHONDRIA	Mitochondria	MITOCHONDRIA
O00487	PSMD14		Cytosol	CYTOSOL
O00522	KRIT1		Plasma Membrane	PLASMA MEMBRANE
O00541	PES1.00	NUCLEUS	Nucleus	NUCLEOLUS
O00559-2	EBAG9	GOLGI APPARATUS	Golgi Apparatus	GOLGI APPARATUS
O00560				LYSOSOME
O00566	MPHOSPH10	NUCLEOLUS	Nucleolus	NUCLEOLUS
O00567	NOP56	NUCLEOLUS	Nucleolus	NUCLEOLUS
O00571	DDX3X		Nucleus	NUCLEOLUS
O00584	RNASET2		Lysosome	LYSOSOME
O00743-3	PPP6C		Cytosol	CYTOSOL
O00746				MITOCHONDRIA
O00748	CES2		Endoplasmic Reticulum	LYSOSOME
O00754	MAN2B1	LYSOSOME	Lysosome	LYSOSOME
O00764	PDXK		Cytosol	CYTOSOL
O00767	SCD		Endoplasmic Reticulum	ENDOPLASMIC RETICULUM
O14497	ARID1A	CHROMATIN	Chromatin	CHROMATIN
O14523	C2CD2L		Endoplasmic Reticulum	LYSOSOME
O14545	TRAFD1		Cytosol	CYTOSOL
O14548				MITOCHONDRIA
O14578-4	CIT		unknown	GOLGI APPARATUS
O14579	COPE		Cytosol	CYTOSOL
O14602				CYTOSOL
O14617-5	AP3D1		Cytosol	CYTOSOL
O14647	CHD2	CHROMATIN	Chromatin	CHROMATIN
O14653-2	GOSR2		unknown	ENDOPLASMIC RETICULUM
O14656	TOR1A		Endoplasmic Reticulum	ENDOPLASMIC RETICULUM
O14657	TOR1B		Endoplasmic Reticulum	ENDOPLASMIC RETICULUM
O14672	ADAM10		Lysosome	PLASMA MEMBRANE
O14681	EI24		Endoplasmic Reticulum	ENDOPLASMIC RETICULUM
O14683	TP53I11		unknown	GOLGI APPARATUS
O14734	ACOT8	PEROXISOME	Peroxisome	PEROXISOME
O14735	CDIPT		Endoplasmic Reticulum	ENDOPLASMIC RETICULUM
O14737	PDCD5		Cytosol	CYTOSOL
O14744	PRMT5		Cytosol	CYTOSOL
O14745	SLC9A3R1		unknown	PLASMA MEMBRANE
O14773	TPP1	LYSOSOME	Lysosome	LYSOSOME
O14776	TCERG1		unknown	NUCLEOLUS
O14777	NDC80		unknown	CHROMATIN
O14818	PSMA8		Cytosol	CYTOSOL
O14828				PLASMA MEMBRANE
O14832				PEROXISOME
O14841	OPLAH	CYTOSOL	Cytosol	CYTOSOL
O14874	BCKDK		Mitochondria	MITOCHONDRIA
O14879	IFIT3		Cytosol	CYTOSOL
O14880	MGST3	MITOCHONDRIA	Mitochondria	MITOCHONDRIA
O14910	LIN7A		unknown	PLASMA MEMBRANE
O14920	IKBKB		Cytosol	CYTOSOL
O14925	TIMM23B		Mitochondria	MITOCHONDRIA
O14929				CYTOSOL
O14949	UQCRQ	MITOCHONDRIA	Mitochondria	MITOCHONDRIA
O14950	MYL12B		unknown	CYTOSOL
O14964	HGS		Plasma Membrane	CYTOSOL
O14966	RAB29		Endoplasmic Reticulum	ENDOPLASMIC RETICULUM
O14967	CLGN		Endoplasmic Reticulum	ENDOPLASMIC RETICULUM
O14972	DSCR3		unknown	LYSOSOME
O14975	SLC27A2		Endoplasmic Reticulum	ENDOPLASMIC RETICULUM
O14976	GAK		Cytosol	CYTOSOL
O14979				NUCLEUS
O14980	XPO1		Cytosol	CYTOSOL
O14994	SYN3		unknown	40S/60S RIBOSOME
O15027-5	SEC16A		unknown	NUCLEUS
O15031	PLXNB2	PLASMA MEMBRANE	Plasma Membrane	PLASMA MEMBRANE
O15033				GOLGI APPARATUS
O15067				CYTOSOL
O15091	KIAA0391	MITOCHONDRIA	Mitochondria	MITOCHONDRIA
O15118	NPC1	LYSOSOME	Lysosome	LYSOSOME
O15120	AGPAT2	ENDOPLASMIC RETICULUM	Endoplasmic Reticulum	ENDOPLASMIC RETICULUM
O15121	DEGS1		Endoplasmic Reticulum	ENDOPLASMIC RETICULUM
O15126	SCAMP1		Lysosome	LYSOSOME
O15127	SCAMP2		Lysosome	PLASMA MEMBRANE
O15143	ARPC1B		unknown	40S/60S RIBOSOME
O15144	ARPC2		unknown	NUCLEUS
O15145	ARPC3		unknown	PLASMA MEMBRANE
O15160	POLR1C	NUCLEUS	Nucleus	NUCLEUS
O15173-2	PGRMC2		Endoplasmic Reticulum	ENDOPLASMIC RETICULUM
O15226-2	NKRF	NUCLEOLUS	Nucleolus	NUCLEOLUS
O15228	GNPAT	PEROXISOME	Peroxisome	PEROXISOME
O15235				MITOCHONDRIA
O15254	ACOX3	PEROXISOME	Peroxisome	PEROXISOME
O15258				ENDOPLASMIC RETICULUM
O15260	SURF4		Endoplasmic Reticulum	ENDOPLASMIC RETICULUM
O15269	SPTLC1	ENDOPLASMIC RETICULUM	Endoplasmic Reticulum	ENDOPLASMIC RETICULUM
O15270	SPTLC2	ENDOPLASMIC RETICULUM	Endoplasmic Reticulum	ENDOPLASMIC RETICULUM
O15294	OGT		Nucleus	NUCLEUS
O15321	TM9SF1		Endoplasmic Reticulum	ENDOPLASMIC RETICULUM
O15347	HMGB3	CHROMATIN	Chromatin	CHROMATIN
O15355	PPM1G		Cytosol	CYTOSOL
O15357	INPPL1		unknown	CYTOSOL
O15371	EIF3D		unknown	NUCLEUS
O15372	EIF3H		Nucleus	NUCLEUS
O15382	BCAT2	MITOCHONDRIA	Mitochondria	MITOCHONDRIA
O15394	NCAM2	PLASMA MEMBRANE	Plasma Membrane	PLASMA MEMBRANE
O15400	STX7		Lysosome	LYSOSOME
O15427	SLC16A3		Lysosome	LYSOSOME
O15431				LYSOSOME
O15439	ABCC4		Lysosome	PLASMA MEMBRANE
O15446-2	CD3EAP	CHROMATIN	Chromatin	CHROMATIN
O15460-2				ENDOPLASMIC RETICULUM
O15479	MAGEB2		unknown	40S/60S RIBOSOME
O15511	ARPC5		unknown	NUCLEUS
O15523	DDX3Y		Nucleus	NUCLEOLUS
O15525				CHROMATIN
O15533-3	TAPBP		Endoplasmic Reticulum	GOLGI APPARATUS
O15553	MEFV		Nucleus	CHROMATIN
O15554				PLASMA MEMBRANE
O43143	DHX15	NUCLEUS	Nucleus	NUCLEUS
O43159				NUCLEOLUS
O43169	CYB5B		Endoplasmic Reticulum	ENDOPLASMIC RETICULUM
O43175	PHGDH		Cytosol	CYTOSOL
O43181	NDUFS4		Mitochondria	MITOCHONDRIA
O43237	DYNC1LI2		unknown	CHROMATIN
O43242	PSMD3		Cytosol	CYTOSOL
O43264	ZW10		unknown	ENDOPLASMIC RETICULUM
O43278-2				PLASMA MEMBRANE
O43290	SART1		Nucleus	NUCLEOLUS
O43292	GPAA1	ENDOPLASMIC RETICULUM	Endoplasmic Reticulum	ENDOPLASMIC RETICULUM
O43293	DAPK3		unknown	GOLGI APPARATUS
O43314	PPIP5K2		unknown	CHROMATIN
O43390	HNRNPR	NUCLEUS	Nucleus	NUCLEUS
O43395	PRPF3	NUCLEUS	Nucleus	NUCLEUS
O43396	TXNL1		Cytosol	CYTOSOL
O43399-7	TPD52L2		Cytosol	CYTOSOL
O43402	EMC8		Endoplasmic Reticulum	ENDOPLASMIC RETICULUM
O43427	FIBP		unknown	PLASMA MEMBRANE
O43432-3	EIF4G3		Nucleus	NUCLEUS
O43447	PPIH		unknown	CYTOSOL
O43464	HTRA2		Mitochondria	MITOCHONDRIA
O43488	AKR7A2		unknown	CYTOSOL
O43491	EPB41L2		Plasma Membrane	PLASMA MEMBRANE
O43493	TGOLN2		Lysosome	LYSOSOME
O43504	LAMTOR5		Lysosome	LYSOSOME
O43516	WIPF1		unknown	PLASMA MEMBRANE
O43566	RGS14		Plasma Membrane	PLASMA MEMBRANE
O43567				PLASMA MEMBRANE
O43583	DENR		unknown	NUCLEUS
O43586	PSTPIP1		unknown	PLASMA MEMBRANE
O43615	TIMM44	MITOCHONDRIA	Mitochondria	MITOCHONDRIA
O43617	TRAPPC3		unknown	PLASMA MEMBRANE
O43633	CHMP2A		unknown	LYSOSOME
O43639	NCK2		unknown	CYTOSOL
O43660	PLRG1	NUCLEUS	Nucleus	NUCLEOLUS
O43663				CHROMATIN
O43670-4	ZNF207		Nucleus	NUCLEUS
O43674	NDUFB5		Mitochondria	MITOCHONDRIA
O43676	NDUFB3		Mitochondria	MITOCHONDRIA
O43678	NDUFA2		Mitochondria	MITOCHONDRIA
O43681				CYTOSOL
O43684-2	BUB3	NUCLEUS	Nucleus	NUCLEUS
O43707	ACTN4		Cytosol	CYTOSOL
O43708	GSTZ1		unknown	MITOCHONDRIA
O43715	TRIAP1		Mitochondria	MITOCHONDRIA
O43716	GATC	MITOCHONDRIA	Mitochondria	MITOCHONDRIA
O43719	HTATSF1		Nucleus	NUCLEUS
O43747	AP1G1		unknown	LYSOSOME
O43752				LYSOSOME
O43760-2	SYNGR2		Lysosome	LYSOSOME
O43768	ENSA		unknown	CYTOSOL
O43772				MITOCHONDRIA
O43776	NARS		Cytosol	CYTOSOL
O43809	NUDT21		Nucleus	NUCLEUS
O43813	LANCL1		Nucleus	NUCLEUS
O43815	STRN		unknown	GOLGI APPARATUS
O43818	RRP9	NUCLEOLUS	Nucleolus	NUCLEOLUS
O43819	SCO2		Mitochondria	MITOCHONDRIA
O43820				ENDOPLASMIC RETICULUM
O43824	GTPBP6		Mitochondria	MITOCHONDRIA
O43826-2				GOLGI APPARATUS
O43837	IDH3B	MITOCHONDRIA	Mitochondria	MITOCHONDRIA
O43847-2	NRDC		Cytosol	CYTOSOL
O43852-3	CALU		unknown	ENDOPLASMIC RETICULUM
O43861	ATP9B		Lysosome	PLASMA MEMBRANE
O43865	AHCYL1		Plasma Membrane	LYSOSOME
O43914	TYROBP		Lysosome	PLASMA MEMBRANE
O43920	NDUFS5		Mitochondria	MITOCHONDRIA
O43933				PEROXISOME
O60216	RAD21	CHROMATIN	Chromatin	CHROMATIN
O60220	TIMM8A		Mitochondria	MITOCHONDRIA
O60234	GMFG		Cytosol	CYTOSOL
O60262	GNG7		Lysosome	PLASMA MEMBRANE
O60264	SMARCA5	CHROMATIN	Chromatin	CHROMATIN
O60266				LYSOSOME
O60271	SPAG9		Cytosol	CYTOSOL
O60306	AQR	NUCLEUS	Nucleus	NUCLEUS
O60313-2	OPA1	MITOCHONDRIA	Mitochondria	MITOCHONDRIA
O60315	ZEB2	CHROMATIN	Chromatin	CHROMATIN
O60331-3	PIP5K1C		Plasma Membrane	PLASMA MEMBRANE
O60337	MARCH6		unknown	ENDOPLASMIC RETICULUM
O60341	KDM1A		Nucleus	NUCLEUS
O60353	FZD6	PLASMA MEMBRANE	Plasma Membrane	PLASMA MEMBRANE
O60427	FADS1		Endoplasmic Reticulum	ENDOPLASMIC RETICULUM
O60462				PLASMA MEMBRANE
O60476	MAN1A2	GOLGI APPARATUS	Golgi Apparatus	ENDOPLASMIC RETICULUM
O60488	ACSL4		unknown	ENDOPLASMIC RETICULUM
O60493	SNX3		Cytosol	CYTOSOL
O60496	DOK2		Cytosol	CYTOSOL
O60503	ADCY9	PLASMA MEMBRANE	Plasma Membrane	PLASMA MEMBRANE
O60504	SORBS3		unknown	40S/60S RIBOSOME
O60508				NUCLEOLUS
O60512				LYSOSOME
O60518				MITOCHONDRIA
O60524	NEMF		unknown	CYTOSOL
O60568	PLOD3	ENDOPLASMIC RETICULUM	Endoplasmic Reticulum	ENDOPLASMIC RETICULUM
O60573	EIF4E2		Nucleus	NUCLEUS
O60603	TLR2		Lysosome	LYSOSOME
O60610	DIAPH1		Cytosol	CYTOSOL
O60613	2015-09-01		unknown	ENDOPLASMIC RETICULUM
O60645-3	EXOC3	GOLGI APPARATUS	Golgi Apparatus	LYSOSOME
O60664	PLIN3		Cytosol	CYTOSOL
O60669	SLC16A7	PLASMA MEMBRANE	Plasma Membrane	PLASMA MEMBRANE
O60701	UGDH		Cytosol	CYTOSOL
O60704	TPST2	GOLGI APPARATUS	Golgi Apparatus	GOLGI APPARATUS
O60762	DPM1		Endoplasmic Reticulum	ENDOPLASMIC RETICULUM
O60763	USO1		Cytosol	CYTOSOL
O60783	MRPS14		Mitochondria	MITOCHONDRIA
O60784-2	TOM1		Plasma Membrane	PLASMA MEMBRANE
O60826	CCDC22		unknown	LYSOSOME
O60830-2	TIMM17B		Mitochondria	MITOCHONDRIA
O60832	DKC1	NUCLEOLUS	Nucleolus	NUCLEOLUS
O60841	EIF5B		unknown	CYTOSOL
O60858-3	TRIM13		Endoplasmic Reticulum	GOLGI APPARATUS
O60861	GAS7		Plasma Membrane	PLASMA MEMBRANE
O60869	EDF1		40S/60S Ribosome	40S/60S RIBOSOME
O60879-2	DIAPH2		unknown	PLASMA MEMBRANE
O60884	DNAJA2		unknown	CYTOSOL
O60885	BRD4	CHROMATIN	Chromatin	CHROMATIN
O60906				ENDOPLASMIC RETICULUM
O60925	PFDN1		Cytosol	CYTOSOL
O60934	NBN	CHROMATIN	Chromatin	CHROMATIN
O60942	RNGTT	NUCLEUS	Nucleus	NUCLEUS
O75027-2	ABCB7	MITOCHONDRIA	Mitochondria	MITOCHONDRIA
O75044	SRGAP2		Plasma Membrane	PLASMA MEMBRANE
O75052	NOS1AP		Lysosome	PLASMA MEMBRANE
O75063	FAM20B	GOLGI APPARATUS	Golgi Apparatus	ENDOPLASMIC RETICULUM
O75064	DENND4B		Cytosol	CYTOSOL
O75071	EFCAB14		Lysosome	LYSOSOME
O75083	WDR1		Cytosol	CYTOSOL
O75116	ROCK2		unknown	PLASMA MEMBRANE
O75127	PTCD1		Mitochondria	MITOCHONDRIA
O75131	CPNE3		Cytosol	CYTOSOL
O75144-2	ICOSLG		unknown	PLASMA MEMBRANE
O75150	RNF40	NUCLEUS	Nucleus	NUCLEUS
O75152	ZC3H11A	NUCLEUS	Nucleus	NUCLEOLUS
O75153	CLUH		unknown	CYTOSOL
O75164	KDM4A		Cytosol	CYTOSOL
O75165	DNAJC13		Lysosome	LYSOSOME
O75175	CNOT3		40S/60S Ribosome	40S/60S RIBOSOME
O75208	COQ9	MITOCHONDRIA	Mitochondria	MITOCHONDRIA
O75251	NDUFS7		Mitochondria	MITOCHONDRIA
O75298	RTN2		Endoplasmic Reticulum	GOLGI APPARATUS
O75306	NDUFS2	MITOCHONDRIA	Mitochondria	MITOCHONDRIA
O75323	GBAS		Mitochondria	MITOCHONDRIA
O75330-3	HMMR		unknown	40S/60S RIBOSOME
O75347	TBCA		Cytosol	CYTOSOL
O75348	ATP6V1G1		unknown	CYTOSOL
O75351	VPS4B		Cytosol	CYTOSOL
O75356				ENDOPLASMIC RETICULUM
O75367	H2AFY	CHROMATIN	Chromatin	CHROMATIN
O75368	SH3BGRL		Cytosol	CYTOSOL
O75369-8	FLNB		Cytosol	CYTOSOL
O75376				NUCLEUS
O75379	VAMP4		unknown	PLASMA MEMBRANE
O75380	NDUFS6	MITOCHONDRIA	Mitochondria	MITOCHONDRIA
O75381	PEX14	PEROXISOME	Peroxisome	PEROXISOME
O75387				PLASMA MEMBRANE
O75390	CS	MITOCHONDRIA	Mitochondria	MITOCHONDRIA
O75394	MRPL33		Mitochondria	MITOCHONDRIA
O75396	SEC22B		Endoplasmic Reticulum	GOLGI APPARATUS
O75400	PRPF40A	NUCLEUS	Nucleus	NUCLEUS
O75410-2	TACC1		Cytosol	CYTOSOL
O75414				MITOCHONDRIA
O75427	LRCH4		Lysosome	PLASMA MEMBRANE
O75431				MITOCHONDRIA
O75436	VPS26A		unknown	CYTOSOL
O75439	PMPCB	MITOCHONDRIA	Mitochondria	MITOCHONDRIA
O75460				ENDOPLASMIC RETICULUM
O75475	PSIP1	CHROMATIN	Chromatin	CHROMATIN
O75477	ERLIN1	ENDOPLASMIC RETICULUM	Endoplasmic Reticulum	ENDOPLASMIC RETICULUM
O75487				PLASMA MEMBRANE
O75489	NDUFS3	MITOCHONDRIA	Mitochondria	MITOCHONDRIA
O75521	ECI2		Mitochondria	MITOCHONDRIA
O75531	BANF1		Nucleus	CYTOSOL
O75533	SF3B1	NUCLEUS	Nucleus	NUCLEUS
O75534-4	CSDE1		unknown	CYTOSOL
O75558				PLASMA MEMBRANE
O75569				40S/60S RIBOSOME
O75570				MITOCHONDRIA
O75592-2				NUCLEOLUS
O75608	LYPLA1		unknown	CYTOSOL
O75616	ERAL1		Mitochondria	MITOCHONDRIA
O75643	SNRNP200	NUCLEUS	Nucleus	NUCLEUS
O75689	ADAP1		Plasma Membrane	PLASMA MEMBRANE
O75694	NUP155	NUCLEUS	Nucleus	CHROMATIN
O75695	RP2	PLASMA MEMBRANE	Plasma Membrane	PLASMA MEMBRANE
O75716				PLASMA MEMBRANE
O75718	CRTAP		Endoplasmic Reticulum	LYSOSOME
O75746	SLC25A12		Mitochondria	MITOCHONDRIA
O75781	PALM		Lysosome	PLASMA MEMBRANE
O75787	ATP6AP2		Endoplasmic Reticulum	ENDOPLASMIC RETICULUM
O75821	EIF3G		Nucleus	NUCLEUS
O75822	EIF3J		Nucleus	NUCLEUS
O75832	PSMD10		Cytosol	CYTOSOL
O75843	AP1G2		Cytosol	CYTOSOL
O75844	ZMPSTE24		Endoplasmic Reticulum	ENDOPLASMIC RETICULUM
O75845	SC5D		unknown	GOLGI APPARATUS
O75874	IDH1		Cytosol	CYTOSOL
O75879	GATB		Mitochondria	MITOCHONDRIA
O75880	SCO1	MITOCHONDRIA	Mitochondria	MITOCHONDRIA
O75882	ATRN		Lysosome	PLASMA MEMBRANE
O75907				PEROXISOME
O75909-4				NUCLEUS
O75915	ARL6IP5		Endoplasmic Reticulum	ENDOPLASMIC RETICULUM
O75934	BCAS2	NUCLEUS	Nucleus	NUCLEOLUS
O75937	DNAJC8		unknown	NUCLEUS
O75940	SMNDC1		Nucleus	NUCLEUS
O75947	ATP5H	MITOCHONDRIA	Mitochondria	MITOCHONDRIA
O75955	FLOT1		Lysosome	LYSOSOME
O75964	ATP5L	MITOCHONDRIA	Mitochondria	MITOCHONDRIA
O75976	CPD		Lysosome	PLASMA MEMBRANE
O76021	RSL1D1	NUCLEOLUS	Nucleolus	NUCLEOLUS
O76031	CLPX	MITOCHONDRIA	Mitochondria	MITOCHONDRIA
O76062				ENDOPLASMIC RETICULUM
O76071	CIAO1		Cytosol	CYTOSOL
O76094	SRP72		Nucleus	NUCLEUS
O76095				PLASMA MEMBRANE
O94759	TRPM2		Endoplasmic Reticulum	LYSOSOME
O94766	B3GAT3	GOLGI APPARATUS	Golgi Apparatus	GOLGI APPARATUS
O94776	MTA2	NUCLEUS	Nucleus	NUCLEUS
O94804	STK10		unknown	PLASMA MEMBRANE
O94819	KBTBD11		unknown	40S/60S RIBOSOME
O94826	TOMM70		Mitochondria	MITOCHONDRIA
O94851-4	MICAL2		Endoplasmic Reticulum	ENDOPLASMIC RETICULUM
O94855-2	SEC24D		Nucleus	CYTOSOL
O94874	UFL1		Endoplasmic Reticulum	ENDOPLASMIC RETICULUM
O94876				GOLGI APPARATUS
O94885	SASH1		unknown	CYTOSOL
O94886	TMEM63A		Lysosome	PLASMA MEMBRANE
O94901-9				CHROMATIN
O94903	PROSC		unknown	CYTOSOL
O94905	ERLIN2	ENDOPLASMIC RETICULUM	Endoplasmic Reticulum	ENDOPLASMIC RETICULUM
O94906	PRPF6		Nucleus	NUCLEUS
O94915	FRYL		Cytosol	CYTOSOL
O94919	ENDOD1		unknown	LYSOSOME
O94925-3	GLS		Mitochondria	MITOCHONDRIA
O94966-5	USP19		Cytosol	CYTOSOL
O94979-8				NUCLEUS
O95067				CHROMATIN
O95070				GOLGI APPARATUS
O95104	SCAF4	NUCLEUS	Nucleus	NUCLEOLUS
O95139	NDUFB6		unknown	MITOCHONDRIA
O95140	MFN2		Mitochondria	MITOCHONDRIA
O95159	ZFPL1	GOLGI APPARATUS	Golgi Apparatus	PEROXISOME
O95163	IKBKAP		Cytosol	CYTOSOL
O95168	NDUFB4		Mitochondria	MITOCHONDRIA
O95169	NDUFB8	MITOCHONDRIA	Mitochondria	MITOCHONDRIA
O95182	NDUFA7		Mitochondria	MITOCHONDRIA
O95197-3				ENDOPLASMIC RETICULUM
O95202	LETM1	MITOCHONDRIA	Mitochondria	MITOCHONDRIA
O95210	STBD1		unknown	LYSOSOME
O95218				CYTOSOL
O95232	LUC7L3		Nucleus	NUCLEUS
O95239	KIF4A	CHROMATIN	Chromatin	CHROMATIN
O95248-4	SBF1		unknown	PLASMA MEMBRANE
O95249	GOSR1	GOLGI APPARATUS	Golgi Apparatus	LYSOSOME
O95292	VAPB	ENDOPLASMIC RETICULUM	Endoplasmic Reticulum	ENDOPLASMIC RETICULUM
O95298	NDUFC2		Mitochondria	MITOCHONDRIA
O95299	NDUFA10	MITOCHONDRIA	Mitochondria	MITOCHONDRIA
O95302-3				LYSOSOME
O95336	PGLS	CYTOSOL	Cytosol	CYTOSOL
O95347	SMC2	CHROMATIN	Chromatin	CHROMATIN
O95372	LYPLA2		Cytosol	CYTOSOL
O95373	IPO7		Cytosol	CYTOSOL
O95400	CD2BP2		Nucleus	NUCLEUS
O95415				PLASMA MEMBRANE
O95433	AHSA1		Cytosol	CYTOSOL
O95450	ADAMTS2		Golgi Apparatus	GOLGI APPARATUS
O95466-2				CYTOSOL
O95470				ENDOPLASMIC RETICULUM
O95477	ABCA1		unknown	PLASMA MEMBRANE
O95479	H6PD		Endoplasmic Reticulum	ENDOPLASMIC RETICULUM
O95486	SEC24A		Nucleus	40S/60S RIBOSOME
O95487-3	SEC24B		unknown	ENDOPLASMIC RETICULUM
O95490-5				PLASMA MEMBRANE
O95562				PLASMA MEMBRANE
O95571	ETHE1		Mitochondria	MITOCHONDRIA
O95573	ACSL3		Endoplasmic Reticulum	ENDOPLASMIC RETICULUM
O95602	POLR1A		unknown	CHROMATIN
O95613	PCNT		unknown	CHROMATIN
O95630				CYTOSOL
O95671				CYTOSOL
O95674				ENDOPLASMIC RETICULUM
O95696-2				CHROMATIN
O95714	HERC2		unknown	40S/60S RIBOSOME
O95716	RAB3D		Endoplasmic Reticulum	ENDOPLASMIC RETICULUM
O95721	SNAP29		Lysosome	PLASMA MEMBRANE
O95747	OXSR1		Cytosol	CYTOSOL
O95757	HSPA4L		Cytosol	CYTOSOL
O95758-4	PTBP3		Nucleus	CHROMATIN
O95782	AP2A1		Lysosome	LYSOSOME
O95785-3				CHROMATIN
O95793	STAU1		40S/60S Ribosome	40S/60S RIBOSOME
O95816	BAG2		unknown	ENDOPLASMIC RETICULUM
O95817	BAG3		unknown	CYTOSOL
O95819-3	MAP4K4		Plasma Membrane	PLASMA MEMBRANE
O95822	MLYCD		Mitochondria	MITOCHONDRIA
O95825	CRYZL1		unknown	CYTOSOL
O95831	AIFM1		Mitochondria	MITOCHONDRIA
O95861	BPNT1		Cytosol	CYTOSOL
O95864	FADS2		Endoplasmic Reticulum	ENDOPLASMIC RETICULUM
O95865	DDAH2		Plasma Membrane	PLASMA MEMBRANE
O95870	ABHD16A		Endoplasmic Reticulum	ENDOPLASMIC RETICULUM
O95873				GOLGI APPARATUS
O95881	TXNDC12		Endoplasmic Reticulum	LYSOSOME
O95900	TRUB2		Mitochondria	MITOCHONDRIA
O95980	RECK	PLASMA MEMBRANE	Plasma Membrane	PLASMA MEMBRANE
O95983				NUCLEUS
O96000	NDUFB10		Mitochondria	MITOCHONDRIA
O96005	CLPTM1		Endoplasmic Reticulum	ENDOPLASMIC RETICULUM
O96008	TOMM40	MITOCHONDRIA	Mitochondria	MITOCHONDRIA
O96011	PEX11B	PEROXISOME	Peroxisome	PEROXISOME
O96013	PAK4		Plasma Membrane	PLASMA MEMBRANE
O96019	ACTL6A		Nucleus	NUCLEUS
O96028				CHROMATIN
P00167	CYB5A		Endoplasmic Reticulum	ENDOPLASMIC RETICULUM
P00338-3	LDHA		Cytosol	CYTOSOL
P00367	GLUD1	MITOCHONDRIA	Mitochondria	MITOCHONDRIA
P00387-3	CYB5R3		Endoplasmic Reticulum	ENDOPLASMIC RETICULUM
P00390-2				NUCLEUS
P00441	SOD1		Cytosol	CYTOSOL
P00491	PNP		Cytosol	CYTOSOL
P00492	HPRT1	CYTOSOL	Cytosol	CYTOSOL
P00505	GOT2	MITOCHONDRIA	Mitochondria	MITOCHONDRIA
P00519-2	ABL1		unknown	PLASMA MEMBRANE
P00558	PGK1.00		unknown	PLASMA MEMBRANE
P00568				CYTOSOL
P00746	CFD		Lysosome	PLASMA MEMBRANE
P00747	PLG		unknown	CHROMATIN
P00749	PLAU		unknown	PLASMA MEMBRANE
P00846	MT-ATP6		unknown	MITOCHONDRIA
P00918	CA2		Cytosol	CYTOSOL
P00966	ASS1		Cytosol	CYTOSOL
P00973	OAS1		Endoplasmic Reticulum	ENDOPLASMIC RETICULUM
P01023				GOLGI APPARATUS
P01024				LYSOSOME
P01033				PLASMA MEMBRANE
P01034	CST3		Endoplasmic Reticulum	LYSOSOME
P01111	NRAS		Plasma Membrane	PLASMA MEMBRANE
P01112	HRAS		unknown	PLASMA MEMBRANE
P01130	LDLR		Lysosome	PLASMA MEMBRANE
P01137	TGFB1		Endoplasmic Reticulum	LYSOSOME
P01730				PLASMA MEMBRANE
P01892	HLA-A	PLASMA MEMBRANE	Plasma Membrane	PLASMA MEMBRANE
P02042	HBD		unknown	CHROMATIN
P02545	LMNA		Chromatin	CHROMATIN
P02649	APOE		Endoplasmic Reticulum	ENDOPLASMIC RETICULUM
P02655	APOC2		Endoplasmic Reticulum	LYSOSOME
P02686	MBP		Plasma Membrane	PLASMA MEMBRANE
P02765	AHSG		unknown	NUCLEUS
P02786	TFRC		Lysosome	LYSOSOME
P02792	FTL		unknown	LYSOSOME
P02794	FTH1		unknown	LYSOSOME
P04035-3	HMGCR		Endoplasmic Reticulum	GOLGI APPARATUS
P04040	CAT		unknown	NUCLEUS
P04062	GBA	LYSOSOME	Lysosome	LYSOSOME
P04066				LYSOSOME
P04075	ALDOA		unknown	CYTOSOL
P04080	CSTB		Cytosol	CYTOSOL
P04083	ANXA1		Cytosol	CYTOSOL
P04150-3				CYTOSOL
P04156				PLASMA MEMBRANE
P04179	SOD2		Mitochondria	MITOCHONDRIA
P04181	OAT	MITOCHONDRIA	Mitochondria	MITOCHONDRIA
P04183	TK1		unknown	NUCLEUS
P04222				LYSOSOME
P04406	GAPDH		Nucleus	NUCLEUS
P04632	CAPNS1		Cytosol	CYTOSOL
P04792	HSPB1		Cytosol	CYTOSOL
P04818	TYMS		unknown	NUCLEUS
P04839	CYBB		Lysosome	LYSOSOME
P04843	RPN1	ENDOPLASMIC RETICULUM	Endoplasmic Reticulum	ENDOPLASMIC RETICULUM
P04899-3	GNAI2		Plasma Membrane	PLASMA MEMBRANE
P04908				CHROMATIN
P04920	SLC4A2		Lysosome	PLASMA MEMBRANE
P04921	GYPC	PLASMA MEMBRANE	Plasma Membrane	PLASMA MEMBRANE
P05023	ATP1A1	PLASMA MEMBRANE	Plasma Membrane	PLASMA MEMBRANE
P05026				PLASMA MEMBRANE
P05067	APP		unknown	GOLGI APPARATUS
P05091	ALDH2	MITOCHONDRIA	Mitochondria	MITOCHONDRIA
P05107	ITGB2		Endoplasmic Reticulum	LYSOSOME
P05114	HMGN1	CHROMATIN	Chromatin	CHROMATIN
P05141	SLC25A5		Mitochondria	MITOCHONDRIA
P05161	ISG15		unknown	CYTOSOL
P05165	PCCA	MITOCHONDRIA	Mitochondria	MITOCHONDRIA
P05166-2	PCCB	MITOCHONDRIA	Mitochondria	MITOCHONDRIA
P05198	EIF2S1		Nucleus	NUCLEUS
P05204	HMGN2	CHROMATIN	Chromatin	CHROMATIN
P05362	ICAM1	PLASMA MEMBRANE	Plasma Membrane	PLASMA MEMBRANE
P05387	RPLP2	40S/60S RIBOSOME	40S/60S Ribosome	40S/60S RIBOSOME
P05388	RPLP0	40S/60S RIBOSOME	40S/60S Ribosome	40S/60S RIBOSOME
P05455	SSB		Cytosol	CYTOSOL
P05556	ITGB1	PLASMA MEMBRANE	Plasma Membrane	PLASMA MEMBRANE
P05771-2	PRKCB		unknown	CYTOSOL
P06213				PLASMA MEMBRANE
P06280	GLA	LYSOSOME	Lysosome	LYSOSOME
P06396	GSN		Plasma Membrane	PLASMA MEMBRANE
P06400	RB1		unknown	CHROMATIN
P06454	PTMA		Cytosol	CYTOSOL
P06493	CDK1		unknown	NUCLEUS
P06576	ATP5B	MITOCHONDRIA	Mitochondria	MITOCHONDRIA
P06702	S100A9		Cytosol	CYTOSOL
P06730-2				NUCLEUS
P06733	ENO1		Cytosol	CYTOSOL
P06737	PYGL		Cytosol	CYTOSOL
P06744	GPI		unknown	CYTOSOL
P06753	TPM3		Cytosol	CYTOSOL
P06753-2	TPM3		Cytosol	CYTOSOL
P06756	ITGAV	PLASMA MEMBRANE	Plasma Membrane	PLASMA MEMBRANE
P06858				GOLGI APPARATUS
P06865	HEXA	LYSOSOME	Lysosome	LYSOSOME
P07099	EPHX1		Endoplasmic Reticulum	ENDOPLASMIC RETICULUM
P07195	LDHB	CYTOSOL	Cytosol	CYTOSOL
P07203	GPX1		unknown	NUCLEUS
P07204	THBD		Plasma Membrane	PLASMA MEMBRANE
P07225	PROS1		Endoplasmic Reticulum	LYSOSOME
P07237	P4HB		Endoplasmic Reticulum	LYSOSOME
P07305	H1F0	CHROMATIN	Chromatin	CHROMATIN
P07332	FES		unknown	CHROMATIN
P07333	CSF1R	PLASMA MEMBRANE	Plasma Membrane	PLASMA MEMBRANE
P07339	CTSD	LYSOSOME	Lysosome	LYSOSOME
P07355-2	ANXA2		Lysosome	PLASMA MEMBRANE
P07384	CAPN1		Cytosol	CYTOSOL
P07437	TUBB		Cytosol	CYTOSOL
P07602-3	PSAP	LYSOSOME	Lysosome	LYSOSOME
P07686	HEXB	LYSOSOME	Lysosome	LYSOSOME
P07711	CTSL	LYSOSOME	Lysosome	LYSOSOME
P07737	PFN1		Cytosol	CYTOSOL
P07741	APRT		Cytosol	CYTOSOL
P07814	EPRS		unknown	CYTOSOL
P07858	CTSB	LYSOSOME	Lysosome	LYSOSOME
P07900-2	HSP90AA1		Cytosol	CYTOSOL
P07902	GALT		Cytosol	CYTOSOL
P07910-2	HNRNPC	NUCLEUS	Nucleus	NUCLEUS
P07919	UQCRH	MITOCHONDRIA	Mitochondria	MITOCHONDRIA
P07947	YES1		Lysosome	PLASMA MEMBRANE
P07954				MITOCHONDRIA
P07996	THBS1		Golgi Apparatus	GOLGI APPARATUS
P08133	ANXA6		unknown	CYTOSOL
P08134	RHOC		unknown	PLASMA MEMBRANE
P08174-2	CD55		Lysosome	PLASMA MEMBRANE
P08195-2	SLC3A2		Lysosome	PLASMA MEMBRANE
P08236	GUSB	LYSOSOME	Lysosome	LYSOSOME
P08238	HSP90AB1		Cytosol	CYTOSOL
P08240	SRPRA	ENDOPLASMIC RETICULUM	Endoplasmic Reticulum	ENDOPLASMIC RETICULUM
P08243	ASNS	CYTOSOL	Cytosol	CYTOSOL
P08246	ELANE		Lysosome	LYSOSOME
P08311	CTSG		unknown	PLASMA MEMBRANE
P08397	HMBS	CYTOSOL	Cytosol	CYTOSOL
P08559	PDHA1	MITOCHONDRIA	Mitochondria	MITOCHONDRIA
P08567	PLEK		Plasma Membrane	PLASMA MEMBRANE
P08571	CD14		unknown	PLASMA MEMBRANE
P08574	CYC1	MITOCHONDRIA	Mitochondria	MITOCHONDRIA
P08575	PTPRC	PLASMA MEMBRANE	Plasma Membrane	PLASMA MEMBRANE
P08579	SNRPB2	NUCLEUS	Nucleus	NUCLEUS
P08582	MELTF	PLASMA MEMBRANE	Plasma Membrane	PLASMA MEMBRANE
P08621	SNRNP70	NUCLEUS	Nucleus	NUCLEUS
P08631	HCK		unknown	PLASMA MEMBRANE
P08648	ITGA5	PLASMA MEMBRANE	Plasma Membrane	PLASMA MEMBRANE
P08670	VIM		Nucleus	NUCLEUS
P08708	RPS17	40S/60S RIBOSOME	40S/60S Ribosome	40S/60S RIBOSOME
P08754	GNAI3		Lysosome	PLASMA MEMBRANE
P08758	ANXA5		Cytosol	CYTOSOL
P08865	RPSA	40S/60S RIBOSOME	40S/60S Ribosome	40S/60S RIBOSOME
P08887	IL6R		unknown	PLASMA MEMBRANE
P08962	CD63		Lysosome	LYSOSOME
P09001	MRPL3	MITOCHONDRIA	Mitochondria	MITOCHONDRIA
P09012	SNRPA	NUCLEUS	Nucleus	NUCLEUS
P09110	ACAA1	PEROXISOME	Peroxisome	PEROXISOME
P09132	SRP19		unknown	CHROMATIN
P09211	GSTP1		Cytosol	CYTOSOL
P09382	LGALS1		Cytosol	CYTOSOL
P09417	QDPR		unknown	NUCLEUS
P09429	HMGB1		Chromatin	CHROMATIN
P09488				CYTOSOL
P09496-2	CLTA		unknown	PLASMA MEMBRANE
P09497-2	CLTB		unknown	LYSOSOME
P09525	ANXA4		unknown	PLASMA MEMBRANE
P09543				PLASMA MEMBRANE
P09601	HMOX1	ENDOPLASMIC RETICULUM	Endoplasmic Reticulum	ENDOPLASMIC RETICULUM
P09622	DLD	MITOCHONDRIA	Mitochondria	MITOCHONDRIA
P09661	SNRPA1	NUCLEUS	Nucleus	NUCLEUS
P09668				LYSOSOME
P09669	COX6C		Mitochondria	MITOCHONDRIA
P09769	FGR		unknown	PLASMA MEMBRANE
P09874	PARP1		unknown	CHROMATIN
P09914				CYTOSOL
P09917				CYTOSOL
P09958	FURIN		Plasma Membrane	PLASMA MEMBRANE
P09972	ALDOC		Cytosol	CYTOSOL
P0C0S5	H2AFV	CHROMATIN	Chromatin	CHROMATIN
P0C7P0	CISD3		Mitochondria	MITOCHONDRIA
P0CG12	CHTF8		unknown	40S/60S RIBOSOME
P0DJ93				PLASMA MEMBRANE
P0DMV9	HSPA1B		Cytosol	CYTOSOL
P10109	FDX1		unknown	MITOCHONDRIA
P10124	SRGN		Plasma Membrane	PLASMA MEMBRANE
P10153	RNASE2		unknown	LYSOSOME
P10155				CYTOSOL
P10253	GAA	LYSOSOME	Lysosome	LYSOSOME
P10301	RRAS		Lysosome	PLASMA MEMBRANE
P10398	ARAF		Cytosol	CYTOSOL
P10412	HIST1H1E	CHROMATIN	Chromatin	CHROMATIN
P10415	BCL2		unknown	GOLGI APPARATUS
P10515	DLAT	MITOCHONDRIA	Mitochondria	MITOCHONDRIA
P10586	PTPRF	PLASMA MEMBRANE	Plasma Membrane	PLASMA MEMBRANE
P10599	TXN		Cytosol	CYTOSOL
P10606	COX5B		Mitochondria	MITOCHONDRIA
P10619	CTSA	LYSOSOME	Lysosome	LYSOSOME
P10620	MGST1		Endoplasmic Reticulum	ENDOPLASMIC RETICULUM
P10644	PRKAR1A		Cytosol	CYTOSOL
P10768	ESD		Cytosol	CYTOSOL
P10809	HSPD1	MITOCHONDRIA	Mitochondria	MITOCHONDRIA
P11021	HSPA5		Endoplasmic Reticulum	ENDOPLASMIC RETICULUM
P11047	LAMC1		Endoplasmic Reticulum	ENDOPLASMIC RETICULUM
P11049	CD37		Lysosome	PLASMA MEMBRANE
P11117	ACP2	LYSOSOME	Lysosome	LYSOSOME
P11142	HSPA8		Cytosol	CYTOSOL
P11166	SLC2A1	PLASMA MEMBRANE	Plasma Membrane	PLASMA MEMBRANE
P11169				PLASMA MEMBRANE
P11171	EPB41		Lysosome	PLASMA MEMBRANE
P11172	UMPS		unknown	CYTOSOL
P11177	PDHB	MITOCHONDRIA	Mitochondria	MITOCHONDRIA
P11182	DBT	MITOCHONDRIA	Mitochondria	MITOCHONDRIA
P11215-2	ITGAM	PLASMA MEMBRANE	Plasma Membrane	PLASMA MEMBRANE
P11233	RALA		Lysosome	PLASMA MEMBRANE
P11234-2	RALB	PLASMA MEMBRANE	Plasma Membrane	PLASMA MEMBRANE
P11274	BCR		Plasma Membrane	PLASMA MEMBRANE
P11279	LAMP1	LYSOSOME	Lysosome	LYSOSOME
P11310-2	ACADM	MITOCHONDRIA	Mitochondria	MITOCHONDRIA
P11387	TOP1.00		Chromatin	CHROMATIN
P11388-4	TOP2A		Chromatin	CHROMATIN
P11413-2	G6PD		Cytosol	CYTOSOL
P11498	PC		Mitochondria	MITOCHONDRIA
P11586	MTHFD1		40S/60S Ribosome	40S/60S RIBOSOME
P11717	IGF2R	LYSOSOME	Lysosome	LYSOSOME
P11766				CYTOSOL
P11908-2				CYTOSOL
P11940	PABPC3		unknown	NUCLEUS
P12004	PCNA		Cytosol	CYTOSOL
P12081	HARS		Cytosol	CYTOSOL
P12109	COL6A1		Endoplasmic Reticulum	ENDOPLASMIC RETICULUM
P12235				MITOCHONDRIA
P12236	SLC25A6		Mitochondria	MITOCHONDRIA
P12268	IMPDH2		unknown	CYTOSOL
P12270	TPR		Nucleus	NUCLEUS
P12314	FCGR1A		unknown	PLASMA MEMBRANE
P12318	FCGR2C	PLASMA MEMBRANE	Plasma Membrane	PLASMA MEMBRANE
P12694	BCKDHA		Mitochondria	MITOCHONDRIA
P12814	ACTN1		unknown	CYTOSOL
P12931-2	SRC		unknown	PLASMA MEMBRANE
P12955				CYTOSOL
P12956	XRCC6	NUCLEUS	Nucleus	NUCLEUS
P13010	XRCC5	NUCLEUS	Nucleus	NUCLEUS
P13073	COX4I1	MITOCHONDRIA	Mitochondria	MITOCHONDRIA
P13196	ALAS1		Mitochondria	MITOCHONDRIA
P13284	IFI30	LYSOSOME	Lysosome	LYSOSOME
P13489	RNH1		Cytosol	CYTOSOL
P13498	CYBA		unknown	LYSOSOME
P13501	CCL5		Lysosome	GOLGI APPARATUS
P13612	ITGA4	PLASMA MEMBRANE	Plasma Membrane	PLASMA MEMBRANE
P13639	EEF2		unknown	NUCLEUS
P13667	PDIA4		Endoplasmic Reticulum	LYSOSOME
P13674	P4HA1		unknown	PLASMA MEMBRANE
P13674-2	P4HA1		unknown	PLASMA MEMBRANE
P13693	TPT1		unknown	CYTOSOL
P13747	HLA-E		unknown	GOLGI APPARATUS
P13796	LCP1		Cytosol	CYTOSOL
P13797				CYTOSOL
P13798	APEH		Cytosol	CYTOSOL
P13804	ETFA	MITOCHONDRIA	Mitochondria	MITOCHONDRIA
P13807	GYS1		unknown	CHROMATIN
P13861	PRKAR2A		unknown	CYTOSOL
P13987	CD59	PLASMA MEMBRANE	Plasma Membrane	PLASMA MEMBRANE
P13995	MTHFD2	MITOCHONDRIA	Mitochondria	MITOCHONDRIA
P14174	MIF		unknown	CYTOSOL
P14207				PLASMA MEMBRANE
P14209	CD99		Plasma Membrane	PLASMA MEMBRANE
P14314	PRKCSH		Endoplasmic Reticulum	LYSOSOME
P14317	HCLS1		Cytosol	CYTOSOL
P14324	FDPS		Cytosol	CYTOSOL
P14384	CPM		Lysosome	PLASMA MEMBRANE
P14543	NID1		unknown	PLASMA MEMBRANE
P14550	AKR1A1		Cytosol	CYTOSOL
P14598				NUCLEUS
P14618	PKM		Cytosol	CYTOSOL
P14618-2				CYTOSOL
P14621				MITOCHONDRIA
P14625	HSP90B1	ENDOPLASMIC RETICULUM	Endoplasmic Reticulum	ENDOPLASMIC RETICULUM
P14678-3	SNRPB		Nucleus	NUCLEUS
P14735	IDE		unknown	CYTOSOL
P14854	COX6B1		Mitochondria	MITOCHONDRIA
P14866	HNRNPL	NUCLEUS	Nucleus	NUCLEUS
P14868	DARS		Cytosol	CYTOSOL
P14923	JUP		Plasma Membrane	PLASMA MEMBRANE
P14927	UQCRB		Mitochondria	MITOCHONDRIA
P15121	AKR1B1		Cytosol	CYTOSOL
P15144	ANPEP	PLASMA MEMBRANE	Plasma Membrane	PLASMA MEMBRANE
P15151	PVR	PLASMA MEMBRANE	Plasma Membrane	PLASMA MEMBRANE
P15153	RAC2		unknown	PLASMA MEMBRANE
P15170-3	GSPT1		Cytosol	CYTOSOL
P15289	ARSA	LYSOSOME	Lysosome	LYSOSOME
P15291				LYSOSOME
P15311	EZR		unknown	PLASMA MEMBRANE
P15498	VAV1		Cytosol	CYTOSOL
P15509-7	CSF2RA		unknown	PLASMA MEMBRANE
P15529-3	CD46		Plasma Membrane	PLASMA MEMBRANE
P15559	NQO1		Nucleus	NUCLEUS
P15586	GNS	LYSOSOME	Lysosome	LYSOSOME
P15848	ARSB	LYSOSOME	Lysosome	LYSOSOME
P15880	RPS2	40S/60S RIBOSOME	40S/60S Ribosome	40S/60S RIBOSOME
P15927				NUCLEUS
P15954	COX7C		unknown	MITOCHONDRIA
P16070	CD44	PLASMA MEMBRANE	Plasma Membrane	PLASMA MEMBRANE
P16104	H2AFX	CHROMATIN	Chromatin	CHROMATIN
P16150	SPN		unknown	PLASMA MEMBRANE
P16152	CBR1	CYTOSOL	Cytosol	CYTOSOL
P16219	ACADS	MITOCHONDRIA	Mitochondria	MITOCHONDRIA
P16220				CHROMATIN
P16260				MITOCHONDRIA
P16278	GLB1	LYSOSOME	Lysosome	LYSOSOME
P16284	PECAM1	PLASMA MEMBRANE	Plasma Membrane	PLASMA MEMBRANE
P16333	NCK1		unknown	CYTOSOL
P16401	HIST1H1B	CHROMATIN	Chromatin	CHROMATIN
P16402	HIST1H1D	CHROMATIN	Chromatin	CHROMATIN
P16403	HIST1H1C	CHROMATIN	Chromatin	CHROMATIN
P16435	POR	ENDOPLASMIC RETICULUM	Endoplasmic Reticulum	ENDOPLASMIC RETICULUM
P16455	MGMT		unknown	CHROMATIN
P16615	ATP2A2	ENDOPLASMIC RETICULUM	Endoplasmic Reticulum	ENDOPLASMIC RETICULUM
P16671				PLASMA MEMBRANE
P16885	PLCG2		Cytosol	CYTOSOL
P16930	FAH	CYTOSOL	Cytosol	CYTOSOL
P16949	STMN1		Cytosol	CYTOSOL
P17050	NAGA	LYSOSOME	Lysosome	LYSOSOME
P17096				CHROMATIN
P17152	TMEM11		Mitochondria	MITOCHONDRIA
P17252	PRKCA		unknown	CYTOSOL
P17480	UBTF		Chromatin	CHROMATIN
P17568	NDUFB7		Mitochondria	MITOCHONDRIA
P17655	CAPN2		Cytosol	CYTOSOL
P17706	PTPN2		unknown	ENDOPLASMIC RETICULUM
P17812	CTPS1	CYTOSOL	Cytosol	CYTOSOL
P17813	ENG		Lysosome	PLASMA MEMBRANE
P17844	DDX5		Nucleus	NUCLEUS
P17858	PFKL		unknown	NUCLEUS
P17900				LYSOSOME
P17931	LGALS3		unknown	PLASMA MEMBRANE
P17936-2				PLASMA MEMBRANE
P17980	PSMC3		unknown	CYTOSOL
P17987	TCP1		Cytosol	CYTOSOL
P18031	PTPN1	ENDOPLASMIC RETICULUM	Endoplasmic Reticulum	ENDOPLASMIC RETICULUM
P18077	RPL35A	40S/60S RIBOSOME	40S/60S Ribosome	40S/60S RIBOSOME
P18084	ITGB5	PLASMA MEMBRANE	Plasma Membrane	PLASMA MEMBRANE
P18085				CYTOSOL
P18124	RPL7	40S/60S RIBOSOME	40S/60S Ribosome	40S/60S RIBOSOME
P18206	VCL		Cytosol	CYTOSOL
P18433	PTPRA		Plasma Membrane	PLASMA MEMBRANE
P18615-3	NELFE		unknown	NUCLEUS
P18621-3	RPL17	40S/60S RIBOSOME	40S/60S Ribosome	40S/60S RIBOSOME
P18669	PGAM4		Cytosol	CYTOSOL
P18754-2	RCC1	CHROMATIN	Chromatin	CHROMATIN
P18850	ATF6		Endoplasmic Reticulum	GOLGI APPARATUS
P18859-2	ATP5J		Mitochondria	MITOCHONDRIA
P18887				NUCLEUS
P19256				PLASMA MEMBRANE
P19338	NCL		Nucleus	CYTOSOL
P19367				MITOCHONDRIA
P19388	POLR2E	NUCLEUS	Nucleus	NUCLEUS
P19397				PLASMA MEMBRANE
P19404	NDUFV2	MITOCHONDRIA	Mitochondria	MITOCHONDRIA
P19440	GGT2	PLASMA MEMBRANE	Plasma Membrane	PLASMA MEMBRANE
P19474	TRIM21		Cytosol	CYTOSOL
P19525	EIF2AK2		unknown	40S/60S RIBOSOME
P19532	TFE3		unknown	CHROMATIN
P19623	SRM	CYTOSOL	Cytosol	CYTOSOL
P19634	SLC9A1		Lysosome	PLASMA MEMBRANE
P19784				CYTOSOL
P19801-2	AOC1		unknown	GOLGI APPARATUS
P19838-2	NFKB1		Nucleus	CYTOSOL
P19878	NCF2		unknown	CYTOSOL
P19971	TYMP		unknown	CYTOSOL
P20020	ATP2B1	PLASMA MEMBRANE	Plasma Membrane	PLASMA MEMBRANE
P20042	EIF2S2		Nucleus	NUCLEUS
P20073	ANXA7		Cytosol	CYTOSOL
P20138	CD33	PLASMA MEMBRANE	Plasma Membrane	PLASMA MEMBRANE
P20160	AZU1		unknown	PLASMA MEMBRANE
P20290	BTF3		unknown	NUCLEOLUS
P20333	TNFRSF1B		Plasma Membrane	PLASMA MEMBRANE
P20338	RAB4A		unknown	LYSOSOME
P20339	RAB5A		Endoplasmic Reticulum	GOLGI APPARATUS
P20340				PLASMA MEMBRANE
P20585	MSH3		Chromatin	CHROMATIN
P20591	MX1		Cytosol	CYTOSOL
P20592	MX2		Nucleus	40S/60S RIBOSOME
P20618	PSMB1		Cytosol	CYTOSOL
P20645	M6PR	LYSOSOME	Lysosome	LYSOSOME
P20674	COX5A		Mitochondria	MITOCHONDRIA
P20700	LMNB1		unknown	CHROMATIN
P20701-2	ITGAL	PLASMA MEMBRANE	Plasma Membrane	PLASMA MEMBRANE
P20702	ITGAX		Lysosome	PLASMA MEMBRANE
P20810-6				CYTOSOL
P20839-6	IMPDH1		Cytosol	CYTOSOL
P20933	AGA		Lysosome	PLASMA MEMBRANE
P21266				CYTOSOL
P21281	ATP6V1B2		Plasma Membrane	CYTOSOL
P21283	ATP6V1C1		unknown	CYTOSOL
P21291	CSRP1		Plasma Membrane	PLASMA MEMBRANE
P21359	NF1		unknown	PLASMA MEMBRANE
P21580				PLASMA MEMBRANE
P21589				PLASMA MEMBRANE
P21730				PLASMA MEMBRANE
P21796	VDAC1		Mitochondria	MITOCHONDRIA
P21912	SDHB	MITOCHONDRIA	Mitochondria	MITOCHONDRIA
P21926				PLASMA MEMBRANE
P21953	BCKDHB	MITOCHONDRIA	Mitochondria	MITOCHONDRIA
P21964	COMT		Endoplasmic Reticulum	ENDOPLASMIC RETICULUM
P22033	MUT	MITOCHONDRIA	Mitochondria	MITOCHONDRIA
P22059	OSBP		unknown	ENDOPLASMIC RETICULUM
P22061-2	PCMT1		unknown	CYTOSOL
P22083	FUT4	GOLGI APPARATUS	Golgi Apparatus	GOLGI APPARATUS
P22087	FBL	NUCLEOLUS	Nucleolus	NUCLEOLUS
P22090	RPS4Y1	40S/60S RIBOSOME	40S/60S Ribosome	40S/60S RIBOSOME
P22102	GART		Cytosol	CYTOSOL
P22234-2	PAICS		Cytosol	CYTOSOL
P22307	SCP2		unknown	PEROXISOME
P22392-2	NME2P1		Cytosol	CYTOSOL
P22570-7				MITOCHONDRIA
P22626	HNRNPA2B1		Nucleus	NUCLEUS
P22681	CBL		Cytosol	CYTOSOL
P22692	IGFBP4		unknown	GOLGI APPARATUS
P22695	UQCRC2	MITOCHONDRIA	Mitochondria	MITOCHONDRIA
P22732	SLC2A5	PLASMA MEMBRANE	Plasma Membrane	PLASMA MEMBRANE
P22794-2	EVI2A		Plasma Membrane	PLASMA MEMBRANE
P22830-2	FECH	MITOCHONDRIA	Mitochondria	MITOCHONDRIA
P23141-2	CES1		Endoplasmic Reticulum	LYSOSOME
P23193	TCEA1	NUCLEUS	Nucleus	NUCLEUS
P23219-5	PTGS1	ENDOPLASMIC RETICULUM	Endoplasmic Reticulum	ENDOPLASMIC RETICULUM
P23246	SFPQ		Nucleus	NUCLEOLUS
P23258	TUBG1		Nucleus	NUCLEOLUS
P23284	PPIB		Endoplasmic Reticulum	ENDOPLASMIC RETICULUM
P23368	ME2	MITOCHONDRIA	Mitochondria	MITOCHONDRIA
P23381	WARS		Cytosol	CYTOSOL
P23396	RPS3	40S/60S RIBOSOME	40S/60S Ribosome	40S/60S RIBOSOME
P23434	GCSH		Mitochondria	MITOCHONDRIA
P23458	JAK1		Lysosome	PLASMA MEMBRANE
P23469	PTPRE		unknown	CYTOSOL
P23470				PLASMA MEMBRANE
P23526	AHCY		Cytosol	CYTOSOL
P23528	CFL1		unknown	CYTOSOL
P23588	EIF4B		Nucleus	NUCLEUS
P23634	ATP2B4	PLASMA MEMBRANE	Plasma Membrane	PLASMA MEMBRANE
P23786	CPT2	MITOCHONDRIA	Mitochondria	MITOCHONDRIA
P23919	DTYMK		unknown	NUCLEUS
P23921	RRM1		unknown	CYTOSOL
P24534	EEF1B2		unknown	CYTOSOL
P24539	ATP5F1	MITOCHONDRIA	Mitochondria	MITOCHONDRIA
P24557-3	TBXAS1		Endoplasmic Reticulum	ENDOPLASMIC RETICULUM
P24666	ACP1		Cytosol	CYTOSOL
P24752	ACAT1	MITOCHONDRIA	Mitochondria	MITOCHONDRIA
P24844	MYL9		unknown	CYTOSOL
P24928	POLR2A		Nucleus	NUCLEUS
P24941	CDK2		Nucleus	NUCLEUS
P25098	GRK2		unknown	CYTOSOL
P25205-2	MCM3		unknown	NUCLEUS
P25325-2	MPST		unknown	CYTOSOL
P25398	RPS12	40S/60S RIBOSOME	40S/60S Ribosome	40S/60S RIBOSOME
P25490	YY1	CHROMATIN	Chromatin	CHROMATIN
P25685	DNAJB1		unknown	NUCLEUS
P25686	DNAJB2		unknown	GOLGI APPARATUS
P25705	ATP5A1		Mitochondria	MITOCHONDRIA
P25774	CTSS	LYSOSOME	Lysosome	LYSOSOME
P25786-2	PSMA1		Cytosol	CYTOSOL
P25787	PSMA2		Cytosol	CYTOSOL
P25788	PSMA3		Cytosol	CYTOSOL
P25789	PSMA4		Cytosol	CYTOSOL
P25942	CD40		unknown	PLASMA MEMBRANE
P26010	ITGB7		unknown	PLASMA MEMBRANE
P26022				LYSOSOME
P26038	MSN		Plasma Membrane	PLASMA MEMBRANE
P26196	DDX6		unknown	NUCLEUS
P26368	U2AF2	NUCLEUS	Nucleus	NUCLEUS
P26373	RPL13	40S/60S RIBOSOME	40S/60S Ribosome	40S/60S RIBOSOME
P26440	IVD	MITOCHONDRIA	Mitochondria	MITOCHONDRIA
P26447	S100A4		Cytosol	CYTOSOL
P26572	MGAT1	GOLGI APPARATUS	Golgi Apparatus	GOLGI APPARATUS
P26583	HMGB2	CHROMATIN	Chromatin	CHROMATIN
P26599-3	PTBP1		Nucleus	NUCLEUS
P26639	TARS		Cytosol	CYTOSOL
P26640	VARS		Cytosol	CYTOSOL
P26641-2				CYTOSOL
P26885	FKBP2		Endoplasmic Reticulum	ENDOPLASMIC RETICULUM
P26951				PLASMA MEMBRANE
P27105	STOM		Plasma Membrane	PLASMA MEMBRANE
P27144	AK4	MITOCHONDRIA	Mitochondria	MITOCHONDRIA
P27348	YWHAQ		Cytosol	CYTOSOL
P27361	MAPK3		Cytosol	CYTOSOL
P27448	MARK3		unknown	PLASMA MEMBRANE
P27449	ATP6V0C		unknown	LYSOSOME
P27540	ARNT	NUCLEUS	Nucleus	NUCLEUS
P27544-2				GOLGI APPARATUS
P27635	RPL10	40S/60S RIBOSOME	40S/60S Ribosome	40S/60S RIBOSOME
P27694	RPA1		Nucleus	NUCLEUS
P27695	APEX1		Nucleus	NUCLEUS
P27701	CD82		unknown	PLASMA MEMBRANE
P27707	DCK		Cytosol	CYTOSOL
P27708	CAD		Nucleus	CYTOSOL
P27797	CALR		Endoplasmic Reticulum	ENDOPLASMIC RETICULUM
P27816	MAP4		unknown	40S/60S RIBOSOME
P27824-2	CANX	ENDOPLASMIC RETICULUM	Endoplasmic Reticulum	ENDOPLASMIC RETICULUM
P27918	CFP		unknown	PLASMA MEMBRANE
P27986	PIK3R1		unknown	NUCLEUS
P28062	PSMB8		Cytosol	CYTOSOL
P28065	PSMB9		Cytosol	CYTOSOL
P28066	PSMA5		Cytosol	CYTOSOL
P28070	PSMB4		Cytosol	CYTOSOL
P28288	ABCD3	PEROXISOME	Peroxisome	PEROXISOME
P28290	SSFA2		Endoplasmic Reticulum	ENDOPLASMIC RETICULUM
P28331-2	NDUFS1	MITOCHONDRIA	Mitochondria	MITOCHONDRIA
P28340	POLD1		unknown	NUCLEUS
P28482	MAPK1		Cytosol	CYTOSOL
P28799	GRN		unknown	LYSOSOME
P28907	CD38		unknown	PLASMA MEMBRANE
P29144	TPP2		Nucleus	NUCLEOLUS
P29218-3	IMPA1	CYTOSOL	Cytosol	CYTOSOL
P29323				PLASMA MEMBRANE
P29350				CYTOSOL
P29353-6	SHC1		unknown	GOLGI APPARATUS
P29372	MPG		unknown	CHROMATIN
P29401				CYTOSOL
P29466	CASP1		Cytosol	CYTOSOL
P29558				NUCLEUS
P29597	TYK2		Plasma Membrane	PLASMA MEMBRANE
P29728				PLASMA MEMBRANE
P29762	CRABP1	CYTOSOL	Cytosol	CYTOSOL
P29992				PLASMA MEMBRANE
P30038	ALDH4A1	MITOCHONDRIA	Mitochondria	MITOCHONDRIA
P30040	ERP29		Endoplasmic Reticulum	LYSOSOME
P30041	PRDX6		Cytosol	CYTOSOL
P30042	C21orf33	MITOCHONDRIA	Mitochondria	MITOCHONDRIA
P30043	BLVRB		Cytosol	CYTOSOL
P30044-2				MITOCHONDRIA
P30048	PRDX3		Mitochondria	MITOCHONDRIA
P30049	ATP5D		unknown	MITOCHONDRIA
P30050	RPL12	40S/60S RIBOSOME	40S/60S Ribosome	40S/60S RIBOSOME
P30084	ECHS1	MITOCHONDRIA	Mitochondria	MITOCHONDRIA
P30085	CMPK1		Cytosol	CYTOSOL
P30086	PEBP1		Cytosol	CYTOSOL
P30101	PDIA3		Endoplasmic Reticulum	LYSOSOME
P30153	PPP2R1A		Cytosol	CYTOSOL
P30154-2				CYTOSOL
P30273	FCER1G		Lysosome	PLASMA MEMBRANE
P30405	PPIF		Mitochondria	MITOCHONDRIA
P30419	NMT1		Nucleus	NUCLEUS
P30511-3	HLA-F		Lysosome	LYSOSOME
P30519	HMOX2		Endoplasmic Reticulum	ENDOPLASMIC RETICULUM
P30520	ADSS		Cytosol	CYTOSOL
P30530	AXL		unknown	PLASMA MEMBRANE
P30533	LRPAP1		Endoplasmic Reticulum	ENDOPLASMIC RETICULUM
P30566	ADSL		Nucleus	CYTOSOL
P30626	SRI		Cytosol	CYTOSOL
P30679				PLASMA MEMBRANE
P30740	SERPINB1		Cytosol	CYTOSOL
P30825				PLASMA MEMBRANE
P30837	ALDH1B1	MITOCHONDRIA	Mitochondria	MITOCHONDRIA
P30876	POLR2B		Nucleus	NUCLEUS
P31040	SDHA	MITOCHONDRIA	Mitochondria	MITOCHONDRIA
P31146	CORO1A		Cytosol	CYTOSOL
P31150				CYTOSOL
P31153	MAT2A	CYTOSOL	Cytosol	CYTOSOL
P31323	PRKAR2B		Plasma Membrane	CYTOSOL
P31689	DNAJA1		unknown	CYTOSOL
P31930	UQCRC1	MITOCHONDRIA	Mitochondria	MITOCHONDRIA
P31937	HIBADH	MITOCHONDRIA	Mitochondria	MITOCHONDRIA
P31939	ATIC		Cytosol	CYTOSOL
P31942				NUCLEUS
P31943	HNRNPH1		Nucleus	NUCLEUS
P31946	YWHAB		Cytosol	CYTOSOL
P31948-2	STIP1		Cytosol	CYTOSOL
P31949	S100A11		Cytosol	CYTOSOL
P32119	PRDX2		unknown	CYTOSOL
P32121-4				PLASMA MEMBRANE
P32189	GK3P		unknown	MITOCHONDRIA
P32246	CCR1		Plasma Membrane	PLASMA MEMBRANE
P32322-3	PYCR1		Mitochondria	MITOCHONDRIA
P32519	ELF1		unknown	CHROMATIN
P32942	ICAM3	PLASMA MEMBRANE	Plasma Membrane	PLASMA MEMBRANE
P32969	RPL9	40S/60S RIBOSOME	40S/60S Ribosome	40S/60S RIBOSOME
P32970	CD70	PLASMA MEMBRANE	Plasma Membrane	PLASMA MEMBRANE
P33121	ACSL1		unknown	ENDOPLASMIC RETICULUM
P33176	KIF5B		unknown	CYTOSOL
P33240				NUCLEUS
P33241-3	LSP1		Plasma Membrane	PLASMA MEMBRANE
P33316				MITOCHONDRIA
P33527	ABCC1		Lysosome	PLASMA MEMBRANE
P33897	ABCD1	PEROXISOME	Peroxisome	PEROXISOME
P33908	MAN1A1	GOLGI APPARATUS	Golgi Apparatus	GOLGI APPARATUS
P33991	MCM4		Cytosol	NUCLEUS
P33992	MCM5		Nucleus	NUCLEUS
P33993	MCM7		Cytosol	CYTOSOL
P34059	GALNS		Lysosome	LYSOSOME
P34820	BMP8B		unknown	ENDOPLASMIC RETICULUM
P34897	SHMT2		Mitochondria	MITOCHONDRIA
P34910-2	EVI2B		Plasma Membrane	PLASMA MEMBRANE
P34913	EPHX2		unknown	CYTOSOL
P34932	HSPA4	CYTOSOL	Cytosol	CYTOSOL
P35221-2	CTNNA1		Plasma Membrane	PLASMA MEMBRANE
P35222	CTNNB1		unknown	PLASMA MEMBRANE
P35226	BMI1		unknown	CHROMATIN
P35232	PHB	MITOCHONDRIA	Mitochondria	MITOCHONDRIA
P35236-3	PTPN7		Cytosol	CYTOSOL
P35240	NF2		Plasma Membrane	PLASMA MEMBRANE
P35241	RDX		unknown	PLASMA MEMBRANE
P35249	RFC4	NUCLEUS	Nucleus	NUCLEUS
P35250	RFC2		unknown	CHROMATIN
P35251	RFC1		unknown	CHROMATIN
P35268	RPL22	40S/60S RIBOSOME	40S/60S Ribosome	40S/60S RIBOSOME
P35269	GTF2F1	NUCLEUS	Nucleus	NUCLEUS
P35270	SPR		unknown	CYTOSOL
P35408	PTGER4		Plasma Membrane	PLASMA MEMBRANE
P35475	IDUA	LYSOSOME	Lysosome	LYSOSOME
P35520-2	CBSL		Cytosol	CYTOSOL
P35556	FBN2		unknown	GOLGI APPARATUS
P35579	MYH9		Nucleus	CYTOSOL
P35606	COPB2		Cytosol	CYTOSOL
P35610				ENDOPLASMIC RETICULUM
P35611-3	ADD1		unknown	CYTOSOL
P35613	BSG		unknown	PLASMA MEMBRANE
P35625	TIMP3		unknown	LYSOSOME
P35637	FUS	NUCLEUS	Nucleus	NUCLEUS
P35658-5	NUP214	NUCLEUS	Nucleus	NUCLEUS
P35659	DEK	CHROMATIN	Chromatin	CHROMATIN
P35813-3				CYTOSOL
P35914	HMGCL		Mitochondria	MITOCHONDRIA
P35998	PSMC2		Cytosol	CYTOSOL
P36222	CHI3L1		Endoplasmic Reticulum	LYSOSOME
P36404	ARL2.00		unknown	CYTOSOL
P36405	ARL3.00		Cytosol	CYTOSOL
P36507	MAP2K2		Cytosol	CYTOSOL
P36542	ATP5C1		unknown	MITOCHONDRIA
P36543	ATP6V1E1		unknown	CYTOSOL
P36551	CPOX		Mitochondria	MITOCHONDRIA
P36578	RPL4	40S/60S RIBOSOME	40S/60S Ribosome	40S/60S RIBOSOME
P36639	NUDT1		unknown	CYTOSOL
P36776	LONP1	MITOCHONDRIA	Mitochondria	MITOCHONDRIA
P36897				LYSOSOME
P36955				LYSOSOME
P36957	DLST	MITOCHONDRIA	Mitochondria	MITOCHONDRIA
P36969	GPX4		unknown	NUCLEUS
P37108	SRP14		Nucleus	NUCLEUS
P37198	NUP62		Nucleus	NUCLEUS
P37235	HPCA		unknown	CYTOSOL
P37268	FDFT1	ENDOPLASMIC RETICULUM	Endoplasmic Reticulum	ENDOPLASMIC RETICULUM
P37287	PIGA		unknown	GOLGI APPARATUS
P37802	TAGLN2	CYTOSOL	Cytosol	CYTOSOL
P37837	TALDO1	CYTOSOL	Cytosol	CYTOSOL
P38117	ETFB	MITOCHONDRIA	Mitochondria	MITOCHONDRIA
P38432	COIL		Nucleus	NUCLEOLUS
P38435	GGCX		Endoplasmic Reticulum	ENDOPLASMIC RETICULUM
P38571				LYSOSOME
P38606	ATP6V1A		unknown	CYTOSOL
P38646	HSPA9		Mitochondria	MITOCHONDRIA
P38919	EIF4A3		Nucleus	NUCLEUS
P39019	RPS19	40S/60S RIBOSOME	40S/60S Ribosome	40S/60S RIBOSOME
P39023	RPL3	40S/60S RIBOSOME	40S/60S Ribosome	40S/60S RIBOSOME
P39060				ENDOPLASMIC RETICULUM
P39210				MITOCHONDRIA
P39656	DDOST		Endoplasmic Reticulum	ENDOPLASMIC RETICULUM
P39687	ANP32A		Cytosol	CYTOSOL
P39748	FEN1		Nucleus	CHROMATIN
P39880-3				CHROMATIN
P40121	CAPG		Cytosol	CYTOSOL
P40222	TXLNA		unknown	CHROMATIN
P40227	CCT6A		Cytosol	CYTOSOL
P40306	PSMB10		Cytosol	CYTOSOL
P40429	RPL13A	40S/60S RIBOSOME	40S/60S Ribosome	40S/60S RIBOSOME
P40763	STAT3		Cytosol	CYTOSOL
P40818	USP8		unknown	40S/60S RIBOSOME
P40855				CYTOSOL
P40925-3	MDH1	CYTOSOL	Cytosol	CYTOSOL
P40926	MDH2		Mitochondria	MITOCHONDRIA
P40937	RFC5	NUCLEUS	Nucleus	NUCLEUS
P40938	RFC3		Nucleus	CHROMATIN
P40939	HADHA	MITOCHONDRIA	Mitochondria	MITOCHONDRIA
P41091	EIF2S3		Nucleus	NUCLEUS
P41214				NUCLEUS
P41218	MNDA		Chromatin	CHROMATIN
P41223	BUD31	NUCLEUS	Nucleus	NUCLEOLUS
P41226	UBA7		Cytosol	CYTOSOL
P41227	NAA10		Cytosol	CYTOSOL
P41231				PLASMA MEMBRANE
P41240	CSK		unknown	CYTOSOL
P41250	GARS		unknown	CYTOSOL
P41252	IARS		Cytosol	CYTOSOL
P41440	SLC19A1		Lysosome	PLASMA MEMBRANE
P41567				NUCLEUS
P42126	ECI1	MITOCHONDRIA	Mitochondria	MITOCHONDRIA
P42166	TMPO	CHROMATIN	Chromatin	CHROMATIN
P42167	TMPO		unknown	CHROMATIN
P42226	STAT6		Cytosol	CYTOSOL
P42285	SKIV2L2	NUCLEUS	Nucleus	NUCLEUS
P42331-4	ARHGAP25		Cytosol	CYTOSOL
P42345	MTOR		unknown	40S/60S RIBOSOME
P42356	PI4KA		Lysosome	PLASMA MEMBRANE
P42566	EPS15		unknown	CYTOSOL
P42574	CASP3		Cytosol	CYTOSOL
P42677	RPS27	40S/60S RIBOSOME	40S/60S Ribosome	40S/60S RIBOSOME
P42694				40S/60S RIBOSOME
P42696	RBM34		unknown	NUCLEOLUS
P42704	LRPPRC		Mitochondria	MITOCHONDRIA
P42765	ACAA2	MITOCHONDRIA	Mitochondria	MITOCHONDRIA
P42766	RPL35	40S/60S RIBOSOME	40S/60S Ribosome	40S/60S RIBOSOME
P42768	WAS		unknown	PLASMA MEMBRANE
P42785	PRCP	LYSOSOME	Lysosome	LYSOSOME
P43007	SLC1A4		Lysosome	LYSOSOME
P43155	CRAT		Mitochondria	MITOCHONDRIA
P43234				LYSOSOME
P43243	MATR3		Nucleus	NUCLEUS
P43246	MSH2	NUCLEUS	Nucleus	NUCLEUS
P43251-2	BTD		unknown	LYSOSOME
P43304	GPD2	MITOCHONDRIA	Mitochondria	MITOCHONDRIA
P43307	SSR1		Endoplasmic Reticulum	ENDOPLASMIC RETICULUM
P43353	ALDH3B1		Lysosome	PLASMA MEMBRANE
P43405	SYK		unknown	40S/60S RIBOSOME
P43487	RANBP1		Cytosol	CYTOSOL
P43490	NAMPT		unknown	CYTOSOL
P43686	PSMC4		Cytosol	CYTOSOL
P43897	TSFM	MITOCHONDRIA	Mitochondria	MITOCHONDRIA
P45877				ENDOPLASMIC RETICULUM
P45954	ACADSB	MITOCHONDRIA	Mitochondria	MITOCHONDRIA
P45973	CBX5	CHROMATIN	Chromatin	CHROMATIN
P45974	USP5		Cytosol	CYTOSOL
P46060	RANGAP1		Nucleus	NUCLEUS
P46063	RECQL		Chromatin	CHROMATIN
P46100	ATRX		unknown	CHROMATIN
P46109	CRKL		Cytosol	CYTOSOL
P46199	MTIF2		Mitochondria	MITOCHONDRIA
P46379-3	BAG6		Cytosol	CYTOSOL
P46459	NSF		unknown	GOLGI APPARATUS
P46531	NOTCH1		unknown	GOLGI APPARATUS
P46734-3				CYTOSOL
P46776	RPL27A	40S/60S RIBOSOME	40S/60S Ribosome	40S/60S RIBOSOME
P46777	RPL5	40S/60S RIBOSOME	40S/60S Ribosome	40S/60S RIBOSOME
P46778	RPL21	40S/60S RIBOSOME	40S/60S Ribosome	40S/60S RIBOSOME
P46779	RPL28	40S/60S RIBOSOME	40S/60S Ribosome	40S/60S RIBOSOME
P46781	RPS9	40S/60S RIBOSOME	40S/60S Ribosome	40S/60S RIBOSOME
P46782	RPS5	40S/60S RIBOSOME	40S/60S Ribosome	40S/60S RIBOSOME
P46783	RPS10	40S/60S RIBOSOME	40S/60S Ribosome	40S/60S RIBOSOME
P46939	UTRN		Lysosome	PLASMA MEMBRANE
P46940	IQGAP1		Cytosol	CYTOSOL
P46977	STT3A		Endoplasmic Reticulum	ENDOPLASMIC RETICULUM
P47755	CAPZA2		Cytosol	CYTOSOL
P47756-2	CAPZB		Cytosol	CYTOSOL
P47897	QARS		unknown	CYTOSOL
P47914	RPL29	40S/60S RIBOSOME	40S/60S Ribosome	40S/60S RIBOSOME
P47985	UQCRFS1P1		Mitochondria	MITOCHONDRIA
P48029				LYSOSOME
P48047	ATP5O		Mitochondria	MITOCHONDRIA
P48059-3	LIMS1		unknown	PLASMA MEMBRANE
P48147	PREP		Cytosol	CYTOSOL
P48382				CHROMATIN
P48426	PIP4K2A		Plasma Membrane	PLASMA MEMBRANE
P48444	ARCN1		Cytosol	CYTOSOL
P48449	LSS	ENDOPLASMIC RETICULUM	Endoplasmic Reticulum	ENDOPLASMIC RETICULUM
P48507	GCLM	CYTOSOL	Cytosol	CYTOSOL
P48509	CD151		Plasma Membrane	PLASMA MEMBRANE
P48553	TRAPPC10		unknown	PLASMA MEMBRANE
P48556	PSMD8		unknown	CYTOSOL
P48634	PRRC2A		40S/60S Ribosome	40S/60S RIBOSOME
P48637	GSS	CYTOSOL	Cytosol	CYTOSOL
P48643	CCT5		Cytosol	CYTOSOL
P48651	PTDSS1		Endoplasmic Reticulum	ENDOPLASMIC RETICULUM
P48723	HSPA13		Endoplasmic Reticulum	ENDOPLASMIC RETICULUM
P48735	IDH2	MITOCHONDRIA	Mitochondria	MITOCHONDRIA
P48960	CD97		unknown	PLASMA MEMBRANE
P49023				PLASMA MEMBRANE
P49069	CAMLG		unknown	ENDOPLASMIC RETICULUM
P49137	MAPKAPK2		Cytosol	CYTOSOL
P49189	ALDH9A1		unknown	MITOCHONDRIA
P49207	RPL34	40S/60S RIBOSOME	40S/60S Ribosome	40S/60S RIBOSOME
P49247	RPIA		unknown	CYTOSOL
P49257	LMAN1		Endoplasmic Reticulum	ENDOPLASMIC RETICULUM
P49321-3	NASP		Cytosol	CYTOSOL
P49327	FASN		unknown	CYTOSOL
P49368	CCT3		Cytosol	CYTOSOL
P49406	MRPL19		Mitochondria	MITOCHONDRIA
P49407				CYTOSOL
P49411	TUFM	MITOCHONDRIA	Mitochondria	MITOCHONDRIA
P49419-2				MITOCHONDRIA
P49448	GLUD2	MITOCHONDRIA	Mitochondria	MITOCHONDRIA
P49454				CHROMATIN
P49458	SRP9		unknown	NUCLEUS
P49585	PCYT1A		Nucleus	CYTOSOL
P49588	AARS	CYTOSOL	Cytosol	CYTOSOL
P49589-3				CYTOSOL
P49590	HARS2	MITOCHONDRIA	Mitochondria	MITOCHONDRIA
P49591	SARS		Cytosol	CYTOSOL
P49593	PPM1F		Cytosol	CYTOSOL
P49641				ENDOPLASMIC RETICULUM
P49711	CTCF	CHROMATIN	Chromatin	CHROMATIN
P49715-3				CHROMATIN
P49736	MCM2		Cytosol	CYTOSOL
P49748-3	ACADVL	MITOCHONDRIA	Mitochondria	MITOCHONDRIA
P49754				LYSOSOME
P49755	TMED10		Endoplasmic Reticulum	ENDOPLASMIC RETICULUM
P49756	RBM25		Nucleus	NUCLEUS
P49757	NUMB		Lysosome	LYSOSOME
P49768	PSEN1		Lysosome	PLASMA MEMBRANE
P49773	HINT1		Cytosol	CYTOSOL
P49790-3	NUP153		Nucleus	CHROMATIN
P49792	RANBP2		unknown	CHROMATIN
P49795	RGS19		Plasma Membrane	PLASMA MEMBRANE
P49810	PSEN2		Plasma Membrane	PLASMA MEMBRANE
P49815				NUCLEOLUS
P49821	NDUFV1	MITOCHONDRIA	Mitochondria	MITOCHONDRIA
P49840	GSK3A		unknown	PLASMA MEMBRANE
P49841-2	GSK3B		unknown	PLASMA MEMBRANE
P49914				MITOCHONDRIA
P49915	GMPS		Cytosol	CYTOSOL
P49916	LIG3		unknown	CHROMATIN
P49959-3	MRE11A	CHROMATIN	Chromatin	CHROMATIN
P50135				CYTOSOL
P50148	GNAQ		Lysosome	PLASMA MEMBRANE
P50150				PLASMA MEMBRANE
P50151	GNG10	PLASMA MEMBRANE	Plasma Membrane	PLASMA MEMBRANE
P50213	IDH3A	MITOCHONDRIA	Mitochondria	MITOCHONDRIA
P50225	SULT1A1		Cytosol	CYTOSOL
P50238	CRIP1		unknown	PLASMA MEMBRANE
P50281	MMP14		unknown	PLASMA MEMBRANE
P50336	PPOX		Mitochondria	MITOCHONDRIA
P50395	GDI2		Cytosol	CYTOSOL
P50416	CPT1A		Endoplasmic Reticulum	ENDOPLASMIC RETICULUM
P50440-2	GATM		Mitochondria	MITOCHONDRIA
P50452	SERPINB8	CYTOSOL	Cytosol	CYTOSOL
P50454	SERPINH1		Endoplasmic Reticulum	ENDOPLASMIC RETICULUM
P50479	PDLIM4		Plasma Membrane	PLASMA MEMBRANE
P50502	ST13	CYTOSOL	Cytosol	CYTOSOL
P50552	VASP		unknown	PLASMA MEMBRANE
P50570				CHROMATIN
P50591				GOLGI APPARATUS
P50895	BCAM	PLASMA MEMBRANE	Plasma Membrane	PLASMA MEMBRANE
P50897	PPT1	LYSOSOME	Lysosome	LYSOSOME
P50914	RPL14	40S/60S RIBOSOME	40S/60S Ribosome	40S/60S RIBOSOME
P50990	CCT8		Cytosol	CYTOSOL
P50991	CCT4		Cytosol	CYTOSOL
P50995	ANXA11		Cytosol	CYTOSOL
P51003	PAPOLG		Nucleus	NUCLEUS
P51114				NUCLEOLUS
P51148-2	RAB5C		unknown	LYSOSOME
P51149	RAB7A		Endoplasmic Reticulum	LYSOSOME
P51151	RAB9A		unknown	LYSOSOME
P51153	RAB13		Lysosome	PLASMA MEMBRANE
P51159	RAB27A		Endoplasmic Reticulum	ENDOPLASMIC RETICULUM
P51397				40S/60S RIBOSOME
P51398	DAP3	MITOCHONDRIA	Mitochondria	MITOCHONDRIA
P51452	DUSP3		unknown	CYTOSOL
P51531-2	SMARCA2	CHROMATIN	Chromatin	CHROMATIN
P51553	IDH3G		Mitochondria	MITOCHONDRIA
P51570-2	GALK1	CYTOSOL	Cytosol	CYTOSOL
P51571	SSR4	ENDOPLASMIC RETICULUM	Endoplasmic Reticulum	ENDOPLASMIC RETICULUM
P51572-2	BCAP31	ENDOPLASMIC RETICULUM	Endoplasmic Reticulum	ENDOPLASMIC RETICULUM
P51608-2				CHROMATIN
P51610	HCFC1		Nucleus	CHROMATIN
P51648-2				ENDOPLASMIC RETICULUM
P51649-2	ALDH5A1	MITOCHONDRIA	Mitochondria	MITOCHONDRIA
P51659	HSD17B4	PEROXISOME	Peroxisome	PEROXISOME
P51665	PSMD7		Cytosol	CYTOSOL
P51689	ARSD		Endoplasmic Reticulum	ENDOPLASMIC RETICULUM
P51787	KCNQ1		unknown	PLASMA MEMBRANE
P51790				LYSOSOME
P51797-5	CLCN6		Lysosome	PLASMA MEMBRANE
P51798	CLCN7		Lysosome	PLASMA MEMBRANE
P51809	VAMP7		Lysosome	LYSOSOME
P51811				PLASMA MEMBRANE
P51812	RPS6KA3		Cytosol	CYTOSOL
P51828	ADCY7		Lysosome	PLASMA MEMBRANE
P51970	NDUFA8	MITOCHONDRIA	Mitochondria	MITOCHONDRIA
P51991	HNRNPA3	NUCLEUS	Nucleus	NUCLEUS
P52209	PGD	CYTOSOL	Cytosol	CYTOSOL
P52272	HNRNPM		Nucleus	NUCLEUS
P52292	KPNA2		Nucleus	NUCLEUS
P52294	KPNA1		unknown	CYTOSOL
P52306-5	RAP1GDS1		Cytosol	CYTOSOL
P52429	DGKE		Endoplasmic Reticulum	GOLGI APPARATUS
P52565	ARHGDIA		Cytosol	CYTOSOL
P52566	ARHGDIB	CYTOSOL	Cytosol	CYTOSOL
P52594-4	AGFG1		unknown	PLASMA MEMBRANE
P52597	HNRNPF		Cytosol	CYTOSOL
P52630	STAT2		unknown	PLASMA MEMBRANE
P52701	MSH6	CHROMATIN	Chromatin	CHROMATIN
P52732	KIF11		unknown	NUCLEUS
P52758	HRSP12		unknown	MITOCHONDRIA
P52789	HK2		Nucleus	NUCLEUS
P52815	MRPL12		Mitochondria	MITOCHONDRIA
P52849				GOLGI APPARATUS
P52888	THOP1	CYTOSOL	Cytosol	CYTOSOL
P52907	CAPZA1		Cytosol	CYTOSOL
P52943-2				PLASMA MEMBRANE
P52948	NUP98		Nucleus	CHROMATIN
P53004				CYTOSOL
P53007	SLC25A1	MITOCHONDRIA	Mitochondria	MITOCHONDRIA
P53041	PPP5C		Cytosol	CYTOSOL
P53350	PLK1		unknown	CHROMATIN
P53384				CYTOSOL
P53582	METAP1		Nucleus	NUCLEUS
P53597	SUCLG1		Mitochondria	MITOCHONDRIA
P53602	MVD	CYTOSOL	Cytosol	CYTOSOL
P53618	COPB1		unknown	CYTOSOL
P53621	COPA		Cytosol	CYTOSOL
P53634	CTSC	LYSOSOME	Lysosome	LYSOSOME
P53680	AP2S1		unknown	LYSOSOME
P53701	HCCS		Mitochondria	MITOCHONDRIA
P53794				PLASMA MEMBRANE
P53801	PTTG1IP		unknown	LYSOSOME
P53985				PLASMA MEMBRANE
P53990-2	IST1		unknown	LYSOSOME
P53992	SEC24C		unknown	40S/60S RIBOSOME
P53999	SUB1		Nucleus	NUCLEUS
P54098	POLG	MITOCHONDRIA	Mitochondria	MITOCHONDRIA
P54136	RARS		unknown	NUCLEUS
P54577	YARS		Cytosol	CYTOSOL
P54578				CYTOSOL
P54709	ATP1B3		Lysosome	PLASMA MEMBRANE
P54762	EPHB1		Plasma Membrane	PLASMA MEMBRANE
P54802				LYSOSOME
P54819-2	AK2		Mitochondria	MITOCHONDRIA
P54886				MITOCHONDRIA
P54920	NAPA		Cytosol	CYTOSOL
P55010	EIF5		Cytosol	CYTOSOL
P55011	SLC12A2		Lysosome	LYSOSOME
P55036	PSMD4		Cytosol	CYTOSOL
P55060	CSE1L		unknown	CYTOSOL
P55061-2				ENDOPLASMIC RETICULUM
P55072	VCP		unknown	CYTOSOL
P55082	MFAP3	PLASMA MEMBRANE	Plasma Membrane	PLASMA MEMBRANE
P55084	HADHB		Mitochondria	MITOCHONDRIA
P55145	MANF		Endoplasmic Reticulum	ENDOPLASMIC RETICULUM
P55160	NCKAP1L		unknown	PLASMA MEMBRANE
P55196-5	AFDN		Plasma Membrane	PLASMA MEMBRANE
P55209	NAP1L1		Cytosol	CYTOSOL
P55265-4				NUCLEOLUS
P55735	SEC13		Nucleus	NUCLEUS
P55769	SNU13	NUCLEOLUS	Nucleolus	NUCLEOLUS
P55786	NPEPPS		Cytosol	CYTOSOL
P55789	GFER		Mitochondria	MITOCHONDRIA
P55809	OXCT1	MITOCHONDRIA	Mitochondria	MITOCHONDRIA
P55884-2	EIF3B		Nucleus	NUCLEUS
P55899	FCGRT		Lysosome	LYSOSOME
P55957-2	BID		unknown	CYTOSOL
P56134				MITOCHONDRIA
P56181-2	NDUFV3		Mitochondria	MITOCHONDRIA
P56182	RRP1	NUCLEOLUS	Nucleolus	NUCLEOLUS
P56192	MARS		Cytosol	CYTOSOL
P56277				MITOCHONDRIA
P56377	AP1S2		unknown	LYSOSOME
P56378	MP68		Mitochondria	MITOCHONDRIA
P56381	ATP5E		unknown	CHROMATIN
P56385	ATP5I		unknown	MITOCHONDRIA
P56537	EIF6		Nucleus	NUCLEUS
P56556				MITOCHONDRIA
P56589	PEX3	PEROXISOME	Peroxisome	PEROXISOME
P56730	PRSS12		Endoplasmic Reticulum	GOLGI APPARATUS
P56937				ENDOPLASMIC RETICULUM
P56962	STX17		Endoplasmic Reticulum	ENDOPLASMIC RETICULUM
P57088	TMEM33		Endoplasmic Reticulum	ENDOPLASMIC RETICULUM
P57105	SYNJ2BP		Mitochondria	MITOCHONDRIA
P57740	NUP107		Nucleus	NUCLEUS
P57764				CYTOSOL
P57772	EEFSEC		unknown	NUCLEUS
P58335-4				LYSOSOME
P58557				MITOCHONDRIA
P59998-3	ARPC4		unknown	CYTOSOL
P60033	CD81		Lysosome	PLASMA MEMBRANE
P60174	TPI1		Cytosol	CYTOSOL
P60228	EIF3E		Nucleus	NUCLEUS
P60468	SEC61B		Endoplasmic Reticulum	GOLGI APPARATUS
P60602				MITOCHONDRIA
P60604	UBE2G2		Endoplasmic Reticulum	ENDOPLASMIC RETICULUM
P60660-2				CYTOSOL
P60842	EIF4A1		Nucleus	NUCLEUS
P60866-2	RPS20	40S/60S RIBOSOME	40S/60S Ribosome	40S/60S RIBOSOME
P60891	PRPS1		Cytosol	CYTOSOL
P60900				CYTOSOL
P60903				LYSOSOME
P60953	CDC42		Plasma Membrane	PLASMA MEMBRANE
P60981	DSTN		Cytosol	CYTOSOL
P60983				CYTOSOL
P61006	RAB8A		Endoplasmic Reticulum	GOLGI APPARATUS
P61009	SPCS3		Endoplasmic Reticulum	ENDOPLASMIC RETICULUM
P61011	SRP54		unknown	NUCLEUS
P61018-2	RAB4B		Endoplasmic Reticulum	LYSOSOME
P61019	RAB2A		Endoplasmic Reticulum	ENDOPLASMIC RETICULUM
P61020	RAB5B		Endoplasmic Reticulum	LYSOSOME
P61026	RAB10		Endoplasmic Reticulum	LYSOSOME
P61081	UBE2M	CYTOSOL	Cytosol	CYTOSOL
P61088	UBE2N		Cytosol	CYTOSOL
P61106	RAB14		Endoplasmic Reticulum	LYSOSOME
P61158	ACTR3		unknown	NUCLEUS
P61160	ACTR2		unknown	NUCLEUS
P61163	ACTR1A		unknown	CYTOSOL
P61221	ABCE1		unknown	40S/60S RIBOSOME
P61224	RAP1B		Lysosome	PLASMA MEMBRANE
P61225				PLASMA MEMBRANE
P61247	RPS3A	40S/60S RIBOSOME	40S/60S Ribosome	40S/60S RIBOSOME
P61313	RPL15	40S/60S RIBOSOME	40S/60S Ribosome	40S/60S RIBOSOME
P61353	RPL27	40S/60S RIBOSOME	40S/60S Ribosome	40S/60S RIBOSOME
P61421	ATP6V0D1		Lysosome	LYSOSOME
P61513	RPL37A	40S/60S RIBOSOME	40S/60S Ribosome	40S/60S RIBOSOME
P61586	RHOA		Plasma Membrane	PLASMA MEMBRANE
P61604	HSPE1	MITOCHONDRIA	Mitochondria	MITOCHONDRIA
P61619	SEC61A1		Endoplasmic Reticulum	ENDOPLASMIC RETICULUM
P61626	LYZ	LYSOSOME	Lysosome	LYSOSOME
P61758	VBP1		Cytosol	CYTOSOL
P61769	B2M		Lysosome	PLASMA MEMBRANE
P61803	DAD1		Endoplasmic Reticulum	ENDOPLASMIC RETICULUM
P61916	NPC2		Lysosome	LYSOSOME
P61923-4	COPZ1		Nucleus	CYTOSOL
P61927	RPL37	40S/60S RIBOSOME	40S/60S Ribosome	40S/60S RIBOSOME
P61962				NUCLEUS
P61964	WDR5		Nucleus	CHROMATIN
P61978-2				NUCLEUS
P61981	YWHAG		Cytosol	CYTOSOL
P62070-4	RRAS2		Plasma Membrane	PLASMA MEMBRANE
P62072	TIMM10	MITOCHONDRIA	Mitochondria	MITOCHONDRIA
P62081	RPS7	40S/60S RIBOSOME	40S/60S Ribosome	40S/60S RIBOSOME
P62136	PPP1CA		unknown	PLASMA MEMBRANE
P62140				PLASMA MEMBRANE
P62158	CALM1		unknown	CYTOSOL
P62191	PSMC1		Cytosol	CYTOSOL
P62195	PSMC5		Cytosol	CYTOSOL
P62241	RPS8	40S/60S RIBOSOME	40S/60S Ribosome	40S/60S RIBOSOME
P62244	RPS15A	40S/60S RIBOSOME	40S/60S Ribosome	40S/60S RIBOSOME
P62249	RPS16	40S/60S RIBOSOME	40S/60S Ribosome	40S/60S RIBOSOME
P62258	YWHAE		Cytosol	CYTOSOL
P62263	RPS14	40S/60S RIBOSOME	40S/60S Ribosome	40S/60S RIBOSOME
P62266	RPS23	40S/60S RIBOSOME	40S/60S Ribosome	40S/60S RIBOSOME
P62269	RPS18	40S/60S RIBOSOME	40S/60S Ribosome	40S/60S RIBOSOME
P62273	RPS29	40S/60S RIBOSOME	40S/60S Ribosome	40S/60S RIBOSOME
P62277	RPS13	40S/60S RIBOSOME	40S/60S Ribosome	40S/60S RIBOSOME
P62280	RPS11	40S/60S RIBOSOME	40S/60S Ribosome	40S/60S RIBOSOME
P62306				NUCLEUS
P62316	SNRPD2		Nucleus	NUCLEUS
P62318	SNRPD3		Nucleus	NUCLEUS
P62328				CYTOSOL
P62330	ARF6		unknown	PLASMA MEMBRANE
P62333	PSMC6		Cytosol	CYTOSOL
P62424	RPL7A	40S/60S RIBOSOME	40S/60S Ribosome	40S/60S RIBOSOME
P62495	ETF1		unknown	NUCLEUS
P62701	RPS4X	40S/60S RIBOSOME	40S/60S Ribosome	40S/60S RIBOSOME
P62750	RPL23A	40S/60S RIBOSOME	40S/60S Ribosome	40S/60S RIBOSOME
P62753	RPS6	40S/60S RIBOSOME	40S/60S Ribosome	40S/60S RIBOSOME
P62805	HIST1H4A	CHROMATIN	Chromatin	CHROMATIN
P62820	RAB1A		unknown	GOLGI APPARATUS
P62826	RAN		Cytosol	CYTOSOL
P62829	RPL23	40S/60S RIBOSOME	40S/60S Ribosome	40S/60S RIBOSOME
P62834	RAP1A		unknown	PLASMA MEMBRANE
P62841	RPS15	40S/60S RIBOSOME	40S/60S Ribosome	40S/60S RIBOSOME
P62851	RPS25	40S/60S RIBOSOME	40S/60S Ribosome	40S/60S RIBOSOME
P62854	RPS26	40S/60S RIBOSOME	40S/60S Ribosome	40S/60S RIBOSOME
P62857	RPS28	40S/60S RIBOSOME	40S/60S Ribosome	40S/60S RIBOSOME
P62861	FAU	40S/60S RIBOSOME	40S/60S Ribosome	40S/60S RIBOSOME
P62873	GNB1		Plasma Membrane	PLASMA MEMBRANE
P62879	GNB2		Plasma Membrane	PLASMA MEMBRANE
P62888	RPL30	40S/60S RIBOSOME	40S/60S Ribosome	40S/60S RIBOSOME
P62891				40S/60S RIBOSOME
P62899	RPL31	40S/60S RIBOSOME	40S/60S Ribosome	40S/60S RIBOSOME
P62906	RPL10A	40S/60S RIBOSOME	40S/60S Ribosome	40S/60S RIBOSOME
P62910	RPL32	40S/60S RIBOSOME	40S/60S Ribosome	40S/60S RIBOSOME
P62913	RPL11	40S/60S RIBOSOME	40S/60S Ribosome	40S/60S RIBOSOME
P62917	RPL8	40S/60S RIBOSOME	40S/60S Ribosome	40S/60S RIBOSOME
P62937	PPIA		Cytosol	CYTOSOL
P62942				CYTOSOL
P62979	RPS27A	40S/60S RIBOSOME	40S/60S Ribosome	40S/60S RIBOSOME
P62993	GRB2		Cytosol	CYTOSOL
P62995				NUCLEUS
P63000-2	RAC1		Plasma Membrane	PLASMA MEMBRANE
P63010-2	AP2B1		Lysosome	LYSOSOME
P63092-2				PLASMA MEMBRANE
P63104	YWHAZ		Cytosol	CYTOSOL
P63151-2	PPP2R2A		Cytosol	CYTOSOL
P63165	SUMO1		unknown	NUCLEUS
P63167	DYNLL1		unknown	CYTOSOL
P63173	RPL38	40S/60S RIBOSOME	40S/60S Ribosome	40S/60S RIBOSOME
P63208	SKP1		unknown	CYTOSOL
P63218	GNG5		unknown	PLASMA MEMBRANE
P63220	RPS21	40S/60S RIBOSOME	40S/60S Ribosome	40S/60S RIBOSOME
P63241				NUCLEUS
P63244	RACK1		40S/60S Ribosome	40S/60S RIBOSOME
P63279	UBE2I		Nucleus	NUCLEUS
P67809	YBX1		Nucleus	NUCLEUS
P67812-3	SEC11B		unknown	40S/60S RIBOSOME
P67870	CSNK2B		unknown	CYTOSOL
P67936	TPM4		Cytosol	CYTOSOL
P68032	ACTG2		unknown	CYTOSOL
P68036-3	UBE2L3		Cytosol	CYTOSOL
P68104	EEF1A1		Nucleus	CHROMATIN
P68371	TUBB4B		Cytosol	CYTOSOL
P68400	CSNK2A1		Cytosol	CYTOSOL
P69905	HBA1		unknown	CHROMATIN
P78316	NOP14	NUCLEOLUS	Nucleolus	NUCLEOLUS
P78324	SIRPB1		Plasma Membrane	PLASMA MEMBRANE
P78344				NUCLEUS
P78347	GTF2I		Chromatin	CHROMATIN
P78356	PIP4K2B		Plasma Membrane	PLASMA MEMBRANE
P78368	CSNK1G2		Plasma Membrane	PLASMA MEMBRANE
P78371	CCT2		Cytosol	CYTOSOL
P78382				ENDOPLASMIC RETICULUM
P78406	RAE1		Nucleus	NUCLEUS
P78417	GSTO1	CYTOSOL	Cytosol	CYTOSOL
P78527	PRKDC		unknown	CHROMATIN
P78536	ADAM17		Lysosome	PLASMA MEMBRANE
P78537				LYSOSOME
P80217-2	IFI35		unknown	NUCLEUS
P80303	NUCB2		Endoplasmic Reticulum	ENDOPLASMIC RETICULUM
P80723	BASP1		unknown	PLASMA MEMBRANE
P82094-2	TMF1		unknown	GOLGI APPARATUS
P82650	MRPS22	MITOCHONDRIA	Mitochondria	MITOCHONDRIA
P82663	MRPS25		Mitochondria	MITOCHONDRIA
P82664				MITOCHONDRIA
P82673	MRPS35		Mitochondria	MITOCHONDRIA
P82675	MRPS5	MITOCHONDRIA	Mitochondria	MITOCHONDRIA
P82909	MRPS36		Mitochondria	MITOCHONDRIA
P82912	MRPS11	MITOCHONDRIA	Mitochondria	MITOCHONDRIA
P82914				MITOCHONDRIA
P82921	MRPS21		unknown	MITOCHONDRIA
P82930	MRPS34		Mitochondria	MITOCHONDRIA
P82932				MITOCHONDRIA
P82933	MRPS9		Mitochondria	MITOCHONDRIA
P82979	SARNP		Nucleus	NUCLEOLUS
P83111	LACTB		Mitochondria	MITOCHONDRIA
P83731	RPL24	40S/60S RIBOSOME	40S/60S Ribosome	40S/60S RIBOSOME
P83881	RPL36A	40S/60S RIBOSOME	40S/60S Ribosome	40S/60S RIBOSOME
P84077	ARF3		Cytosol	CYTOSOL
P84090	ERH		Nucleus	NUCLEUS
P84095	RHOG		Lysosome	PLASMA MEMBRANE
P84098	RPL19	40S/60S RIBOSOME	40S/60S Ribosome	40S/60S RIBOSOME
P84101	SERF2		unknown	40S/60S RIBOSOME
P84103	SRSF3		Nucleus	NUCLEUS
P84243				NUCLEUS
P85037	FOXK1		Nucleus	CHROMATIN
P86790	CCZ1B	LYSOSOME	Lysosome	LYSOSOME
P98082	DAB2		Plasma Membrane	LYSOSOME
P98155-2	VLDLR		Lysosome	LYSOSOME
P98160	HSPG2		unknown	GOLGI APPARATUS
P98171-2	ARHGAP4		unknown	CHROMATIN
P98175-3	RBM10		Nucleus	NUCLEUS
P98179	RBM3		Nucleus	NUCLEUS
P98194-7	ATP2C1	GOLGI APPARATUS	Golgi Apparatus	GOLGI APPARATUS
P98196	ATP11A		unknown	PLASMA MEMBRANE
P99999	CYCS		Mitochondria	MITOCHONDRIA
Q00013	MPP1		Lysosome	PLASMA MEMBRANE
Q00059	TFAM		Mitochondria	MITOCHONDRIA
Q00325-2	SLC25A3	MITOCHONDRIA	Mitochondria	MITOCHONDRIA
Q00341	HDLBP		unknown	40S/60S RIBOSOME
Q00534	CDK6		Cytosol	CYTOSOL
Q00535	CDK5		unknown	CYTOSOL
Q00577	PURA		Nucleus	NUCLEUS
Q00610	CLTC		unknown	LYSOSOME
Q00653-4				CYTOSOL
Q00688	FKBP3		40S/60S Ribosome	40S/60S RIBOSOME
Q00765	REEP5	ENDOPLASMIC RETICULUM	Endoplasmic Reticulum	LYSOSOME
Q00796	SORD		Nucleus	NUCLEUS
Q00839	HNRNPU	NUCLEUS	Nucleus	NUCLEUS
Q00839-2	HNRNPU		Nucleus	NUCLEUS
Q01081	U2AF1L4	NUCLEUS	Nucleus	NUCLEUS
Q01082	SPTBN1		Plasma Membrane	PLASMA MEMBRANE
Q01082-3	SPTBN1		Plasma Membrane	PLASMA MEMBRANE
Q01085-2				CYTOSOL
Q01151				LYSOSOME
Q01196-8	RUNX1		unknown	CHROMATIN
Q01433	AMPD2	CYTOSOL	Cytosol	CYTOSOL
Q01459	CTBS	LYSOSOME	Lysosome	LYSOSOME
Q01469	FABP5		Cytosol	CYTOSOL
Q01518	CAP1		unknown	CYTOSOL
Q01581	HMGCS1	CYTOSOL	Cytosol	CYTOSOL
Q01628				ENDOPLASMIC RETICULUM
Q01650	SLC7A5		Plasma Membrane	PLASMA MEMBRANE
Q01780	EXOSC10		Nucleus	NUCLEOLUS
Q01813	PFKP		unknown	NUCLEUS
Q01826-2	SATB1	CHROMATIN	Chromatin	CHROMATIN
Q01844-5	EWSR1		Nucleus	NUCLEUS
Q01968	OCRL		unknown	GOLGI APPARATUS
Q01970	PLCB3		Plasma Membrane	PLASMA MEMBRANE
Q02040	AKAP17A	NUCLEUS	Nucleus	NUCLEOLUS
Q02083				LYSOSOME
Q02127	DHODH	MITOCHONDRIA	Mitochondria	MITOCHONDRIA
Q02218	OGDH	MITOCHONDRIA	Mitochondria	MITOCHONDRIA
Q02241	KIF23		Nucleus	CHROMATIN
Q02252	ALDH6A1	MITOCHONDRIA	Mitochondria	MITOCHONDRIA
Q02338	BDH1		Mitochondria	MITOCHONDRIA
Q02543	RPL18A	40S/60S RIBOSOME	40S/60S Ribosome	40S/60S RIBOSOME
Q02556	IRF8		Nucleus	NUCLEUS
Q02790	FKBP4		Cytosol	CYTOSOL
Q02809-2	PLOD1		Endoplasmic Reticulum	ENDOPLASMIC RETICULUM
Q02818	NUCB1		Endoplasmic Reticulum	ENDOPLASMIC RETICULUM
Q02878	RPL6	40S/60S RIBOSOME	40S/60S Ribosome	40S/60S RIBOSOME
Q02880-2	TOP2B		Chromatin	CHROMATIN
Q02978	SLC25A11		Mitochondria	MITOCHONDRIA
Q03169	TNFAIP2		unknown	CHROMATIN
Q03188	CENPC		unknown	CHROMATIN
Q03252	LMNB2		unknown	CHROMATIN
Q03405	PLAUR	PLASMA MEMBRANE	Plasma Membrane	PLASMA MEMBRANE
Q03426	MVK		Cytosol	CYTOSOL
Q03518	TAP1		Endoplasmic Reticulum	ENDOPLASMIC RETICULUM
Q03519	TAP2	ENDOPLASMIC RETICULUM	Endoplasmic Reticulum	ENDOPLASMIC RETICULUM
Q03701	CEBPZ		unknown	NUCLEOLUS
Q04206	RELA		Cytosol	CYTOSOL
Q04323-2	UBXN1		Cytosol	CYTOSOL
Q04446	GBE1	CYTOSOL	Cytosol	CYTOSOL
Q04656-3				PLASMA MEMBRANE
Q04721	NOTCH2		Endoplasmic Reticulum	LYSOSOME
Q04759	PRKCQ		unknown	PLASMA MEMBRANE
Q04760	GLO1	CYTOSOL	Cytosol	CYTOSOL
Q04837	SSBP1		Mitochondria	MITOCHONDRIA
Q04917	YWHAH		Cytosol	CYTOSOL
Q04941	PLP2		Plasma Membrane	PLASMA MEMBRANE
Q05193	DNM1		unknown	CYTOSOL
Q05209	PTPN12		unknown	CYTOSOL
Q05639	EEF1A2	NUCLEUS	Nucleus	40S/60S RIBOSOME
Q05655	PRKCD		Cytosol	CYTOSOL
Q05932				MITOCHONDRIA
Q05D32	CTDSPL2		Nucleus	CHROMATIN
Q06055-2	ATP5G1		Peroxisome	GOLGI APPARATUS
Q06124-2	PTPN11		Cytosol	CYTOSOL
Q06136	KDSR		Endoplasmic Reticulum	ENDOPLASMIC RETICULUM
Q06187-2	BTK		unknown	CYTOSOL
Q06210	GFPT1		unknown	NUCLEUS
Q06265-2				NUCLEUS
Q06323	PSME1		Cytosol	CYTOSOL
Q06330				CHROMATIN
Q06413-5				CHROMATIN
Q06481	APLP2		unknown	PLASMA MEMBRANE
Q06830	PRDX1		Cytosol	CYTOSOL
Q07020	RPL18	40S/60S RIBOSOME	40S/60S Ribosome	40S/60S RIBOSOME
Q07021	C1QBP		Mitochondria	MITOCHONDRIA
Q07065	CKAP4		Endoplasmic Reticulum	ENDOPLASMIC RETICULUM
Q07666	KHDRBS1		Nucleus	NUCLEOLUS
Q07812-2	BAX		unknown	MITOCHONDRIA
Q07820	MCL1		unknown	GOLGI APPARATUS
Q07954	LRP1		Lysosome	PLASMA MEMBRANE
Q07955	SRSF1		Nucleus	NUCLEUS
Q07960	ARHGAP1		Cytosol	CYTOSOL
Q08170				NUCLEUS
Q08209-2	PPP3CA		Plasma Membrane	CYTOSOL
Q08211	DHX9		Nucleus	NUCLEUS
Q08334	IL10RB	PLASMA MEMBRANE	Plasma Membrane	PLASMA MEMBRANE
Q08357	SLC20A2		Lysosome	PLASMA MEMBRANE
Q08378	GOLGA3		Cytosol	CYTOSOL
Q08379	GOLGA2		unknown	NUCLEUS
Q08380	LGALS3BP		Lysosome	LYSOSOME
Q08426	EHHADH	PEROXISOME	Peroxisome	PEROXISOME
Q08722	CD47		Lysosome	LYSOSOME
Q08752	PPID		Cytosol	CYTOSOL
Q08945	SSRP1		Nucleus	CHROMATIN
Q08AM6	VAC14		unknown	NUCLEOLUS
Q08J23	NSUN2		Cytosol	CYTOSOL
Q09028	RBBP4		Nucleus	NUCLEUS
Q09161	NCBP1		Nucleus	NUCLEUS
Q09328	MGAT5		Lysosome	PLASMA MEMBRANE
Q09472	EP300		unknown	NUCLEOLUS
Q09666	AHNAK		Lysosome	LYSOSOME
Q0JRZ9	FCHO2		Plasma Membrane	CYTOSOL
Q0VD83-4	APOBR		unknown	CYTOSOL
Q0VDF9	HSPA14		Nucleus	NUCLEUS
Q10469	MGAT2	GOLGI APPARATUS	Golgi Apparatus	ENDOPLASMIC RETICULUM
Q10471	GALNT2	GOLGI APPARATUS	Golgi Apparatus	GOLGI APPARATUS
Q10472	GALNT1	GOLGI APPARATUS	Golgi Apparatus	ENDOPLASMIC RETICULUM
Q10567				LYSOSOME
Q10567-3				LYSOSOME
Q10570	CPSF1	NUCLEUS	Nucleus	NUCLEUS
Q10588	BST1	PLASMA MEMBRANE	Plasma Membrane	PLASMA MEMBRANE
Q10589	BST2		Lysosome	PLASMA MEMBRANE
Q10713	PMPCA	MITOCHONDRIA	Mitochondria	MITOCHONDRIA
Q11201	ST3GAL1	GOLGI APPARATUS	Golgi Apparatus	PLASMA MEMBRANE
Q12767-2				PLASMA MEMBRANE
Q12768	KIAA0196		unknown	ENDOPLASMIC RETICULUM
Q12769	NUP160		unknown	NUCLEUS
Q12770	SCAP		Endoplasmic Reticulum	LYSOSOME
Q12772	SREBF2		Endoplasmic Reticulum	GOLGI APPARATUS
Q12788	TBL3	NUCLEOLUS	Nucleolus	NUCLEOLUS
Q12792				CYTOSOL
Q12797	ASPH	ENDOPLASMIC RETICULUM	Endoplasmic Reticulum	ENDOPLASMIC RETICULUM
Q12800				CHROMATIN
Q12824				CHROMATIN
Q12830	BPTF	CHROMATIN	Chromatin	CHROMATIN
Q12834	CDC20		unknown	CHROMATIN
Q12846	STX4		Lysosome	LYSOSOME
Q12849	GRSF1	MITOCHONDRIA	Mitochondria	MITOCHONDRIA
Q12874	SF3A3	NUCLEUS	Nucleus	NUCLEUS
Q12882	DPYD	CYTOSOL	Cytosol	CYTOSOL
Q12894-2				40S/60S RIBOSOME
Q12904-2	AIMP1		unknown	CYTOSOL
Q12905	ILF2		Nucleus	NUCLEUS
Q12906-7	ILF3		Nucleus	NUCLEUS
Q12907	LMAN2		Endoplasmic Reticulum	ENDOPLASMIC RETICULUM
Q12912	LRMP		Endoplasmic Reticulum	ENDOPLASMIC RETICULUM
Q12913	PTPRJ	PLASMA MEMBRANE	Plasma Membrane	PLASMA MEMBRANE
Q12931	TRAP1	MITOCHONDRIA	Mitochondria	MITOCHONDRIA
Q12933-2	TRAF2		Cytosol	CYTOSOL
Q12959-4				PLASMA MEMBRANE
Q12965	MYO1E		Cytosol	PLASMA MEMBRANE
Q12974				LYSOSOME
Q12979	ABR		Plasma Membrane	PLASMA MEMBRANE
Q12981	BNIP1		Endoplasmic Reticulum	ENDOPLASMIC RETICULUM
Q12983				MITOCHONDRIA
Q12986	NFX1		Nucleus	40S/60S RIBOSOME
Q12996	CSTF3	NUCLEUS	Nucleus	NUCLEUS
Q13011	ECH1		Mitochondria	MITOCHONDRIA
Q13043	STK4		Cytosol	CYTOSOL
Q13057-2	COASY		unknown	CYTOSOL
Q13084	MRPL28	MITOCHONDRIA	Mitochondria	MITOCHONDRIA
Q13085-4	ACACA		unknown	CYTOSOL
Q13094	LCP2		unknown	CYTOSOL
Q13098-7	GPS1		unknown	CYTOSOL
Q13107	USP4		Cytosol	CYTOSOL
Q13112				CHROMATIN
Q13123	IK		Nucleus	NUCLEOLUS
Q13129	RLF		Chromatin	CHROMATIN
Q13131-2	PRKAA1		Cytosol	CYTOSOL
Q13136	PPFIA1		unknown	PLASMA MEMBRANE
Q13137-4	CALCOCO2		Plasma Membrane	PLASMA MEMBRANE
Q13144	EIF2B5		unknown	CYTOSOL
Q13148	TARDBP		Nucleus	NUCLEUS
Q13151	HNRNPA0	NUCLEUS	Nucleus	NUCLEUS
Q13155	AIMP2		Cytosol	CYTOSOL
Q13162	PRDX4		Endoplasmic Reticulum	ENDOPLASMIC RETICULUM
Q13177	PAK2		Cytosol	CYTOSOL
Q13185	CBX3	NUCLEUS	Nucleus	NUCLEUS
Q13190	STX5		Endoplasmic Reticulum	ENDOPLASMIC RETICULUM
Q13200	PSMD2		Cytosol	CYTOSOL
Q13206	DDX10		unknown	NUCLEOLUS
Q13217	DNAJC3		Endoplasmic Reticulum	ENDOPLASMIC RETICULUM
Q13232	NME3		unknown	ENDOPLASMIC RETICULUM
Q13242	SRSF9	NUCLEUS	Nucleus	NUCLEUS
Q13243	SRSF5		Nucleus	NUCLEUS
Q13247	SRSF6		Nucleus	NUCLEUS
Q13263	TRIM28	NUCLEUS	Nucleus	NUCLEUS
Q13277	STX3		Lysosome	PLASMA MEMBRANE
Q13283	G3BP1		Nucleus	40S/60S RIBOSOME
Q13287	NMI		unknown	NUCLEUS
Q13310-3	PABPC4		Nucleus	NUCLEUS
Q13315	ATM		unknown	CHROMATIN
Q13325				CYTOSOL
Q13330-3				CHROMATIN
Q13347	EIF3I		Nucleus	NUCLEUS
Q13363				CYTOSOL
Q13370	PDE3B		Endoplasmic Reticulum	ENDOPLASMIC RETICULUM
Q13393	PLD1		Lysosome	PLASMA MEMBRANE
Q13405	MRPL49		Mitochondria	MITOCHONDRIA
Q13409-7				CYTOSOL
Q13418	ILK		Plasma Membrane	PLASMA MEMBRANE
Q13423	NNT	MITOCHONDRIA	Mitochondria	MITOCHONDRIA
Q13425	SNTB2		Plasma Membrane	PLASMA MEMBRANE
Q13427	PPIG	NUCLEUS	Nucleus	NUCLEOLUS
Q13428-4	TCOF1		unknown	40S/60S RIBOSOME
Q13435	SF3B2	NUCLEUS	Nucleus	NUCLEUS
Q13438				ENDOPLASMIC RETICULUM
Q13442	PDAP1		Nucleus	CYTOSOL
Q13443	ADAM9		Lysosome	PLASMA MEMBRANE
Q13445				ENDOPLASMIC RETICULUM
Q13451	FKBP5		Cytosol	CYTOSOL
Q13459	MYO9B		unknown	CYTOSOL
Q13464	ROCK1		Plasma Membrane	PLASMA MEMBRANE
Q13469				CHROMATIN
Q13488	TCIRG1		Lysosome	LYSOSOME
Q13492	PICALM		unknown	LYSOSOME
Q13496	MTM1		unknown	LYSOSOME
Q13501	SQSTM1		Plasma Membrane	PLASMA MEMBRANE
Q13505	MTX1		Mitochondria	MITOCHONDRIA
Q13510-2	ASAH1	LYSOSOME	Lysosome	LYSOSOME
Q13526	PIN1		Cytosol	CYTOSOL
Q13530				LYSOSOME
Q13535				CHROMATIN
Q13541				CYTOSOL
Q13547	HDAC1		Nucleus	NUCLEUS
Q13555-4				CHROMATIN
Q13557-8	CAMK2D		Nucleus	CHROMATIN
Q13561-2	DCTN2		Cytosol	CYTOSOL
Q13563	PKD2		Endoplasmic Reticulum	ENDOPLASMIC RETICULUM
Q13568-2				CHROMATIN
Q13571				LYSOSOME
Q13573	SNW1		Nucleus	NUCLEOLUS
Q13574				PLASMA MEMBRANE
Q13586	STIM1		Endoplasmic Reticulum	ENDOPLASMIC RETICULUM
Q13596	SNX1		Cytosol	CYTOSOL
Q13601	KRR1		Nucleus	NUCLEOLUS
Q13608				PEROXISOME
Q13616	CUL1		unknown	NUCLEUS
Q13617-2	CUL2		Cytosol	CYTOSOL
Q13618	CUL3		Nucleus	NUCLEUS
Q13619	CUL4A		unknown	NUCLEUS
Q13627-2	DYRK1A		unknown	NUCLEOLUS
Q13630	TSTA3	CYTOSOL	Cytosol	CYTOSOL
Q13636	RAB31		Endoplasmic Reticulum	LYSOSOME
Q13637	RAB32		Endoplasmic Reticulum	ENDOPLASMIC RETICULUM
Q13641	TPBG	PLASMA MEMBRANE	Plasma Membrane	PLASMA MEMBRANE
Q13642-4				CYTOSOL
Q13671	RIN1		unknown	CYTOSOL
Q13724	MOGS	ENDOPLASMIC RETICULUM	Endoplasmic Reticulum	ENDOPLASMIC RETICULUM
Q13740-2	ALCAM	PLASMA MEMBRANE	Plasma Membrane	PLASMA MEMBRANE
Q13769	THOC5	NUCLEUS	Nucleus	NUCLEOLUS
Q13795				PLASMA MEMBRANE
Q13823	GNL2		Nucleus	NUCLEOLUS
Q13825				MITOCHONDRIA
Q13838-2	DDX39B		Nucleus	NUCLEUS
Q13867				CYTOSOL
Q13873				PLASMA MEMBRANE
Q13884	SNTB1		Lysosome	PLASMA MEMBRANE
Q13895	BYSL	NUCLEOLUS	Nucleolus	NUCLEOLUS
Q13907	IDI1		unknown	CYTOSOL
Q14004				NUCLEOLUS
Q14008-3	CKAP5		unknown	CHROMATIN
Q14011	CIRBP		Nucleus	NUCLEUS
Q14012				CYTOSOL
Q14019	COTL1		Cytosol	CYTOSOL
Q14055	COL9A2		unknown	40S/60S RIBOSOME
Q14088	RAB33A		Endoplasmic Reticulum	LYSOSOME
Q14103-3				NUCLEUS
Q14108	SCARB2	LYSOSOME	Lysosome	LYSOSOME
Q14114-2				PLASMA MEMBRANE
Q14118	DAG1		Lysosome	PLASMA MEMBRANE
Q14126	DSG2	PLASMA MEMBRANE	Plasma Membrane	PLASMA MEMBRANE
Q14137	BOP1.00	NUCLEOLUS	Nucleolus	NUCLEOLUS
Q14139-2	UBE4A		unknown	CYTOSOL
Q14141	2006-09-01		unknown	CHROMATIN
Q14142				LYSOSOME
Q14149	MORC3		unknown	CHROMATIN
Q14151				NUCLEOLUS
Q14152	EIF3A		Nucleus	NUCLEUS
Q14155-5	ARHGEF7		Cytosol	CYTOSOL
Q14156	EFR3A		Lysosome	PLASMA MEMBRANE
Q14157-5	UBAP2L		Nucleus	NUCLEOLUS
Q14160				PLASMA MEMBRANE
Q14161	GIT2		unknown	CYTOSOL
Q14165	MLEC		Endoplasmic Reticulum	ENDOPLASMIC RETICULUM
Q14166	TTLL12		Cytosol	CYTOSOL
Q14168-4	MPP2		unknown	PLASMA MEMBRANE
Q14192	FHL2		unknown	CYTOSOL
Q14197	MRPL58		Mitochondria	MITOCHONDRIA
Q14202				CHROMATIN
Q14203	DCTN1		Cytosol	CYTOSOL
Q14204	DYNC1H1		unknown	CHROMATIN
Q14232				CYTOSOL
Q14240-2	EIF4A2		Nucleus	NUCLEUS
Q14241	TCEB3		Nucleus	CHROMATIN
Q14249	ENDOG		unknown	MITOCHONDRIA
Q14254	FLOT2		Lysosome	PLASMA MEMBRANE
Q14257-2	RCN2		Endoplasmic Reticulum	ENDOPLASMIC RETICULUM
Q14258	TRIM25		unknown	40S/60S RIBOSOME
Q14289-2	PTK2B		unknown	CYTOSOL
Q14318-2				ENDOPLASMIC RETICULUM
Q14331	FRG1		Nucleus	NUCLEUS
Q14344	GNA13		Lysosome	PLASMA MEMBRANE
Q14393	GAS6		Endoplasmic Reticulum	ENDOPLASMIC RETICULUM
Q14444	CAPRIN1		Nucleus	NUCLEUS
Q14457				40S/60S RIBOSOME
Q14493	SLBP		Nucleus	NUCLEUS
Q14498	RBM39	NUCLEUS	Nucleus	NUCLEUS
Q14517	FAT1		unknown	GOLGI APPARATUS
Q14534				ENDOPLASMIC RETICULUM
Q14554	PDIA5		Endoplasmic Reticulum	ENDOPLASMIC RETICULUM
Q14566	MCM6		Cytosol	CYTOSOL
Q14571				ENDOPLASMIC RETICULUM
Q14573	ITPR3		Endoplasmic Reticulum	ENDOPLASMIC RETICULUM
Q14642				PLASMA MEMBRANE
Q14667	KIAA0100		Endoplasmic Reticulum	ENDOPLASMIC RETICULUM
Q14677	CLINT1		unknown	CHROMATIN
Q14683	SMC1A	CHROMATIN	Chromatin	CHROMATIN
Q14684				NUCLEOLUS
Q14690	PDCD11	NUCLEOLUS	Nucleolus	NUCLEOLUS
Q14694-2	USP10		Nucleus	NUCLEUS
Q14696	MESDC2		Endoplasmic Reticulum	ENDOPLASMIC RETICULUM
Q14697				LYSOSOME
Q14699	RFTN1	PLASMA MEMBRANE	Plasma Membrane	PLASMA MEMBRANE
Q14728				ENDOPLASMIC RETICULUM
Q14739	LBR		Endoplasmic Reticulum	ENDOPLASMIC RETICULUM
Q14764	MVP		unknown	NUCLEOLUS
Q14814-4	MEF2D	CHROMATIN	Chromatin	CHROMATIN
Q14839-2	CHD4	CHROMATIN	Chromatin	CHROMATIN
Q14847	LASP1		Plasma Membrane	PLASMA MEMBRANE
Q14914	PTGR1		Cytosol	CYTOSOL
Q14956	GPNMB		Lysosome	LYSOSOME
Q14964				LYSOSOME
Q14966	ZNF638		unknown	CHROMATIN
Q14974	KPNB1		Cytosol	CYTOSOL
Q14BN4	SLMAP		Endoplasmic Reticulum	ENDOPLASMIC RETICULUM
Q14C86-6	GAPVD1		Cytosol	CYTOSOL
Q14CX7				CHROMATIN
Q15003	NCAPH		Nucleus	CHROMATIN
Q15005	SPCS2	ENDOPLASMIC RETICULUM	Endoplasmic Reticulum	ENDOPLASMIC RETICULUM
Q15006	EMC2		Endoplasmic Reticulum	ENDOPLASMIC RETICULUM
Q15007	WTAP		Nucleus	NUCLEUS
Q15008	PSMD6		unknown	CYTOSOL
Q15011	HERPUD1		Endoplasmic Reticulum	GOLGI APPARATUS
Q15018	FAM175B		Cytosol	CYTOSOL
Q15019-2				CHROMATIN
Q15021	NCAPD2	CHROMATIN	Chromatin	CHROMATIN
Q15022	SUZ12		unknown	CHROMATIN
Q15024	EXOSC7		Nucleus	NUCLEUS
Q15025				PLASMA MEMBRANE
Q15029	EFTUD2	NUCLEUS	Nucleus	NUCLEUS
Q15031	LARS2		Mitochondria	MITOCHONDRIA
Q15035	TRAM2		unknown	GOLGI APPARATUS
Q15041				ENDOPLASMIC RETICULUM
Q15042	RAB3GAP1		Cytosol	CYTOSOL
Q15043	SLC39A14		Lysosome	LYSOSOME
Q15046-2	KARS		unknown	CYTOSOL
Q15050	RRS1	NUCLEOLUS	Nucleolus	NUCLEOLUS
Q15052	ARHGEF6		unknown	CYTOSOL
Q15054				NUCLEUS
Q15057	ACAP2		unknown	CYTOSOL
Q15058				40S/60S RIBOSOME
Q15059	BRD3	CHROMATIN	Chromatin	CHROMATIN
Q15061	WDR43	NUCLEOLUS	Nucleolus	NUCLEOLUS
Q15067-2	ACOX1	PEROXISOME	Peroxisome	PEROXISOME
Q15070	OXA1L	MITOCHONDRIA	Mitochondria	MITOCHONDRIA
Q15075	EEA1		Cytosol	CYTOSOL
Q15080	NCF4		unknown	CYTOSOL
[truncated: 2,068 more rows]

## Sheet: CCMPS_static_ctrl
Accession/UniprotID	Genes	CC_Ribosome	CC_Chromatin	CC_Cytosol	CC_ER	CC_Golgi	CC_Lysosome	CC_Mitochondria	CC_Nucleolus	CC_Nucleus	CC_Peroxisome	CC_PM	MainCompartment
A0AVT1	UBA6	0	0	1	0	0	0	0	0	0	0	0	CYTOSOL
A0FGR8-2	ESYT2	0	0	0	0.549848	0.235155	0.214997	0	0	0	0	0	ENDOPLASMIC RETICULUM
A0JNW5	UHRF1BP1L	0	0	0.255005	0	0.28907	0	0	0	0.455925	0	0	NUCLEUS
A0MZ66-3	SHTN1	0	0	0.890454	0	0	0	0	0	0	0	0.109546	CYTOSOL
A1L0T0	ILVBL	0	0	0	1	0	0	0	0	0	0	0	ENDOPLASMIC RETICULUM
A1L170-2		0	0	0	0	0	0	0	0	0	0	1	PLASMA MEMBRANE
A1X283		0	0.420251	0	0	0.391942	0	0	0	0	0	0.187808	CHROMATIN
A2RRP1	NBAS	0	0	0	1	0	0	0	0	0	0	0	ENDOPLASMIC RETICULUM
A2RUS2	DENND3	0.316749	0	0.218379	0	0	0	0	0.464872	0	0	0	NUCLEOLUS
A2VDJ0-5	KIAA0922	0	0	0	0.515585	0.241216	0.243199	0	0	0	0	0	ENDOPLASMIC RETICULUM
A3KMH1	VWA8	0	0	0	0	0	0	1	0	0	0	0	MITOCHONDRIA
A3KN83		0	0	0.508687	0	0	0	0	0	0.491313	0	0	CYTOSOL
A4D1E9	GTPBP10	0	0	0	0	0	0	1	0	0	0	0	MITOCHONDRIA
A4D1P6	WDR91	0	0	1	0	0	0	0	0	0	0	0	CYTOSOL
A5YKK6	CNOT1	1	0	0	0	0	0	0	0	0	0	0	40S/60S RIBOSOME
A6NC98	CCDC88B	0	0	0.587282	0	0	0	0	0	0	0	0.412718	CYTOSOL
A6NDG6	PGP	0	0	1	0	0	0	0	0	0	0	0	CYTOSOL
A6NHR9	SMCHD1	0	1	0	0	0	0	0	0	0	0	0	CHROMATIN
A6NI72		0	0	0.380515	0	0	0	0	0	0.619485	0	0	NUCLEUS
A6NJ78	METTL15	0	0	0	0	0	0	1	0	0	0	0	MITOCHONDRIA
A8MVS5	HIDE1	0	0	0	0	0	0	0	0	0	0	1	PLASMA MEMBRANE
A8MVW0		0	0	0	0	0	0	0	0	0	0	1	PLASMA MEMBRANE
A8MXV4	NUDT19	0	0	0	0	0	0	0.562086	0	0	0.437914	0	MITOCHONDRIA
B0I1T2	MYO1G	0	0	0	0	0	0	0	0	0	0	1	PLASMA MEMBRANE
B7ZBB8		0	0	0.409613	0	0	0	0	0	0.317104	0	0.273283	CYTOSOL
C9JLW8	MCRIP1	0	0.355527	0	0	0	0	0	0.322618	0.321856	0	0	CHROMATIN
E9PAV3		0	0	0.534352	0	0	0	0	0	0.465648	0	0	CYTOSOL
E9PRG8		0.454121	0	0	0	0	0	0	0.545879	0	0	0	NUCLEOLUS
F5H4A9		0	0	0	0	0.292363	0	0	0	0	0	0.707637	PLASMA MEMBRANE
H3BSY2		0	0	0	0	0.228191	0.2534	0	0	0	0	0.518409	PLASMA MEMBRANE
O00115	DNASE2	0	0	0	0	0	0.737335	0	0	0	0	0.262665	LYSOSOME
O00116	AGPS	0	0	0	0	0	0	0.161281	0	0	0.838719	0	PEROXISOME
O00124		0.178745	0	0	0.628902	0	0.192353	0	0	0	0	0	ENDOPLASMIC RETICULUM
O00142	TK2	0	0	0	0	0	0	1	0	0	0	0	MITOCHONDRIA
O00148	DDX39A	0	0	0.165379	0	0	0	0	0	0.834621	0	0	NUCLEUS
O00151	PDLIM1	0	0	0.49819	0	0	0	0	0	0	0	0.50181	PLASMA MEMBRANE
O00154-7		0	0	1	0	0	0	0	0	0	0	0	CYTOSOL
O00159-3	MYO1C	0	0	0	0	0	0	0	0	0	0	1	PLASMA MEMBRANE
O00160	MYO1F	0	0	1	0	0	0	0	0	0	0	0	CYTOSOL
O00161	SNAP23	0	0	0	0	0	0	0	0	0	0	1	PLASMA MEMBRANE
O00165-2	HAX1	0	0	0	0	0	0	1	0	0	0	0	MITOCHONDRIA
O00170	AIP	0	0	1	0	0	0	0	0	0	0	0	CYTOSOL
O00178	GTPBP1	0	0	0	0	0	0	0	0	1	0	0	NUCLEUS
O00182	LGALS9	0	0	0	0	0	0	0	0	0	0	1	PLASMA MEMBRANE
O00186	STXBP3	0	0	0	0	0	0.305329	0	0	0	0	0.694671	PLASMA MEMBRANE
O00193	SMAP	0	0	1	0	0	0	0	0	0	0	0	CYTOSOL
O00203	AP3B2	0	0	1	0	0	0	0	0	0	0	0	CYTOSOL
O00214-2	LGALS8	0	0	0	0	0	0	0	0	0	0	1	PLASMA MEMBRANE
O00217	NDUFS8	0	0	0	0	0	0	1	0	0	0	0	MITOCHONDRIA
O00221		0	0	0.841758	0	0	0	0	0	0	0	0.158242	CYTOSOL
O00231-2	PSMD11	0	0	0.718222	0	0	0	0	0	0.281778	0	0	CYTOSOL
O00232	PSMD12	0	0	0.747441	0	0	0	0	0	0.252559	0	0	CYTOSOL
O00241	SIRPB1	0	0	0	0	0	0	0	0	0	0	1	PLASMA MEMBRANE
O00264	PGRMC1	0	0	0	0.709954	0.290046	0	0	0	0	0	0	ENDOPLASMIC RETICULUM
O00291	HIP1	0.175486	0	0	0	0	0.490243	0	0	0	0	0.334272	LYSOSOME
O00299	CLIC1	0	0	1	0	0	0	0	0	0	0	0	CYTOSOL
O00303	EIF3F	0	0	0.529995	0	0	0	0	0	0.470005	0	0	CYTOSOL
O00308	WWP2	0	0	0	0	0.237342	0	0	0	0	0	0.762659	PLASMA MEMBRANE
O00329	PIK3CD	0	0	0.259031	0	0	0	0	0	0.740969	0	0	NUCLEUS
O00330	PDHX	0	0	0	0	0	0	1	0	0	0	0	MITOCHONDRIA
O00391	QSOX1	0	0	0	0	0.484255	0.24544	0	0	0	0	0.270305	GOLGI APPARATUS
O00399		0	0	0.704211	0	0	0	0	0	0.295789	0	0	CYTOSOL
O00400	SLC33A1	0	0	0	0.683059	0.316941	0	0	0	0	0	0	ENDOPLASMIC RETICULUM
O00410-3	IPO5	0	0	1	0	0	0	0	0	0	0	0	CYTOSOL
O00411	POLRMT	0	0	0	0	0	0	1	0	0	0	0	MITOCHONDRIA
O00422	SAP18	0	0	0	0	0	0	0	0.332667	0.667333	0	0	NUCLEUS
O00442-2	RTCA	0	0	0.572774	0	0	0	0	0	0.427226	0	0	CYTOSOL
O00443	PIK3C2A	0.331279	0	0	0.31408	0.354642	0	0	0	0	0	0	GOLGI APPARATUS
O00461	GOLIM4	0	0	0	0	1	0	0	0	0	0	0	GOLGI APPARATUS
O00468	AGRN	0.15241	0	0	0	0.428756	0.238378	0	0	0	0	0.180456	GOLGI APPARATUS
O00471	EXOC5	0	0	0	0	0.456826	0	0	0	0	0	0.543174	PLASMA MEMBRANE
O00483	NDUFA4	0	0	0	0	0	0	1	0	0	0	0	MITOCHONDRIA
O00487	PSMD14	0	0	0.585364	0	0	0	0	0	0.414636	0	0	CYTOSOL
O00522	KRIT1	0	0	0	0	0	0	0	0	0	0	1	PLASMA MEMBRANE
O00541	PES1.00	0	0	0	0	0	0	0	0.466819	0.53318	0	0	NUCLEUS
O00559-2	EBAG9	0	0	0	0.27712	0.471437	0.251443	0	0	0	0	0	GOLGI APPARATUS
O00566	MPHOSPH10	0	0	0	0	0	0	0	1	0	0	0	NUCLEOLUS
O00567	NOP56	0	0	0	0	0	0	0	0.766095	0.233905	0	0	NUCLEOLUS
O00571	DDX3X	0.156951	0	0	0	0	0	0	0.536419	0.30663	0	0	NUCLEOLUS
O00584	RNASET2	0	0	0	0	0	1	0	0	0	0	0	LYSOSOME
O00629		0	0	0.847235	0	0	0	0	0	0	0	0.152765	CYTOSOL
O00635		0	0	0.468622	0	0	0	0	0	0.531378	0	0	NUCLEUS
O00743-3	PPP6C	0	0	1	0	0	0	0	0	0	0	0	CYTOSOL
O00748	CES2	0.18569	0	0	0.547682	0	0.266629	0	0	0	0	0	ENDOPLASMIC RETICULUM
O00754	MAN2B1	0	0	0	0	0	1	0	0	0	0	0	LYSOSOME
O00762		0	0	0.66905	0	0	0	0	0	0.33095	0	0	CYTOSOL
O00764	PDXK	0	0	1	0	0	0	0	0	0	0	0	CYTOSOL
O00767	SCD	0.139304	0	0	0.301768	0.200067	0.222422	0	0	0	0	0.136438	ENDOPLASMIC RETICULUM
O14497	ARID1A	0	1	0	0	0	0	0	0	0	0	0	CHROMATIN
O14523	C2CD2L	0.174832	0	0	0.453751	0.202987	0.16843	0	0	0	0	0	ENDOPLASMIC RETICULUM
O14545	TRAFD1	0	0	1	0	0	0	0	0	0	0	0	CYTOSOL
O14578-4	CIT	0	0	0	0	0.414286	0	0	0	0	0	0.585714	PLASMA MEMBRANE
O14579	COPE	0	0	0.716801	0	0	0	0	0	0.283199	0	0	CYTOSOL
O14617-5	AP3D1	0	0	1	0	0	0	0	0	0	0	0	CYTOSOL
O14618		0	0	1	0	0	0	0	0	0	0	0	CYTOSOL
O14647	CHD2	0	1	0	0	0	0	0	0	0	0	0	CHROMATIN
O14653-2	GOSR2	0	0	0	0.490701	0.509299	0	0	0	0	0	0	GOLGI APPARATUS
O14656	TOR1A	0	0	0	0.549495	0.250011	0.200494	0	0	0	0	0	ENDOPLASMIC RETICULUM
O14657	TOR1B	0.222102	0	0	0.426945	0	0.350953	0	0	0	0	0	ENDOPLASMIC RETICULUM
O14672	ADAM10	0	0	0	0	0.198996	0	0	0	0	0	0.801004	PLASMA MEMBRANE
O14681	EI24	0.225266	0	0	0.774734	0	0	0	0	0	0	0	ENDOPLASMIC RETICULUM
O14683	TP53I11	0	0	0	0.280424	0.246894	0.317349	0	0	0	0	0.155333	LYSOSOME
O14732		0	0	1	0	0	0	0	0	0	0	0	CYTOSOL
O14734	ACOT8	0.162147	0	0	0.229589	0	0	0	0	0	0.608264	0	PEROXISOME
O14735	CDIPT	0	0	0	1	0	0	0	0	0	0	0	ENDOPLASMIC RETICULUM
O14737	PDCD5	0	0	1	0	0	0	0	0	0	0	0	CYTOSOL
O14744	PRMT5	0	0	1	0	0	0	0	0	0	0	0	CYTOSOL
O14745	SLC9A3R1	0	0	0.372335	0	0	0	0	0	0	0	0.627665	PLASMA MEMBRANE
O14773	TPP1	0	0	0	0	0	0.867308	0	0	0	0	0.132692	LYSOSOME
O14776	TCERG1	0.284249	0.715751	0	0	0	0	0	0	0	0	0	CHROMATIN
O14777	NDC80	0	0.606321	0	0	0	0	0	0	0	0	0.393679	CHROMATIN
O14786		0	0	0	0	0	0	0	0	0	0	1	PLASMA MEMBRANE
O14787-2		0	0	1	0	0	0	0	0	0	0	0	CYTOSOL
O14818	PSMA7	0	0	1	0	0	0	0	0	0	0	0	CYTOSOL
O14841	OPLAH	0	0	1	0	0	0	0	0	0	0	0	CYTOSOL
O14867		0	0	0.751666	0	0	0	0	0	0	0	0.248334	CYTOSOL
O14874	BCKDK	0	0	0	0	0	0	1	0	0	0	0	MITOCHONDRIA
O14879	IFIT3	0	0	1	0	0	0	0	0	0	0	0	CYTOSOL
O14880	MGST3	0	0	0	0	0	0	0.773528	0	0	0.226472	0	MITOCHONDRIA
O14908		0	0	0	0	0	0	0	0	0	0	1	PLASMA MEMBRANE
O14910	LIN7A	0	0	0	0	0	0.238141	0	0	0	0	0.761859	PLASMA MEMBRANE
O14920	IKBKB	0	0	1	0	0	0	0	0	0	0	0	CYTOSOL
O14925	TIMM23B	0	0	0	0	0	0	1	0	0	0	0	MITOCHONDRIA
O14933		0	0	1	0	0	0	0	0	0	0	0	CYTOSOL
O14949	UQCRQ	0	0	0	0	0	0	1	0	0	0	0	MITOCHONDRIA
O14950	MYL12B	0	0	1	0	0	0	0	0	0	0	0	CYTOSOL
O14964	HGS	0	0	0.567632	0	0	0.248237	0	0	0	0	0.18413	CYTOSOL
O14966	RAB29	0	0	0	0.469453	0.276281	0.254266	0	0	0	0	0	ENDOPLASMIC RETICULUM
O14967	CLGN	0	0	0	0.289793	0.323174	0.182277	0	0	0	0	0.204756	GOLGI APPARATUS
O14972	DSCR3	0	0	0	0	0	0.819983	0	0	0	0	0.180017	LYSOSOME
O14975	SLC27A2	0	0	0	0.482833	0.345559	0	0	0	0	0	0.171608	ENDOPLASMIC RETICULUM
O14976	GAK	0	0	1	0	0	0	0	0	0	0	0	CYTOSOL
O14980	XPO1	0	0	0.431289	0	0	0	0	0	0.568711	0	0	NUCLEUS
O14981		0	0.695287	0	0	0	0	0	0	0.304713	0	0	CHROMATIN
O14994	SYN3	0.31506	0	0.212321	0	0	0	0	0	0	0	0.47262	PLASMA MEMBRANE
O15014		0.202435	0.797565	0	0	0	0	0	0	0	0	0	CHROMATIN
O15027-5	SEC16A	0.266673	0	0.261429	0	0	0	0	0	0.471898	0	0	NUCLEUS
O15031	PLXNB2	0	0	0	0	0	0	0	0	0	0	1	PLASMA MEMBRANE
O15042		0	0	0.166706	0	0	0	0	0	0.833294	0	0	NUCLEUS
O15056		0	0.737158	0	0	0	0	0	0	0	0	0.262842	CHROMATIN
O15085-2		0	0	0.129109	0	0	0	0	0	0	0	0.870891	PLASMA MEMBRANE
O15091	KIAA0391	0	0	0	0	0	0	1	0	0	0	0	MITOCHONDRIA
O15118	NPC1	0	0	0	0	0.245917	0.754083	0	0	0	0	0	LYSOSOME
O15120	AGPAT2	0	0	0	0.691662	0.308338	0	0	0	0	0	0	ENDOPLASMIC RETICULUM
O15121	DEGS1	0	0	0	1	0	0	0	0	0	0	0	ENDOPLASMIC RETICULUM
O15126	SCAMP1	0	0	0	0	0	0.378554	0	0	0	0	0.621446	PLASMA MEMBRANE
O15127	SCAMP2	0	0	0	0	0	0.244681	0	0	0	0	0.755319	PLASMA MEMBRANE
O15143	ARPC1B	0	0	0.407352	0	0	0	0	0	0.592648	0	0	NUCLEUS
O15144	ARPC2	0	0	0.519856	0	0	0	0	0	0.480144	0	0	CYTOSOL
O15145	ARPC3	0	0	0.427678	0	0	0	0	0	0.572322	0	0	NUCLEUS
O15160	POLR1C	0	0	0.229915	0	0	0	0	0	0.770085	0	0	NUCLEUS
O15173-2	PGRMC2	0	0	0	0.810652	0	0	0.189348	0	0	0	0	ENDOPLASMIC RETICULUM
O15212		0	0	0.676676	0	0	0	0	0	0.323324	0	0	CYTOSOL
O15226-2	NKRF	0	0	0	0	0	0	0	1	0	0	0	NUCLEOLUS
O15228	GNPAT	0	0	0	0	0	0	0	0	0	1	0	PEROXISOME
O15254	ACOX3	0	0	0	0	0	0	0.151506	0	0	0.848494	0	PEROXISOME
O15260	SURF4	0	0	0	0.516922	0.242426	0.240652	0	0	0	0	0	ENDOPLASMIC RETICULUM
O15269	SPTLC1	0	0	0	0.731171	0	0.268829	0	0	0	0	0	ENDOPLASMIC RETICULUM
O15270	SPTLC2	0	0	0	0.74912	0	0.25088	0	0	0	0	0	ENDOPLASMIC RETICULUM
O15294	OGT	0	0	0.239943	0	0	0	0	0	0.760057	0	0	NUCLEUS
O15320-8		0	0	0	1	0	0	0	0	0	0	0	ENDOPLASMIC RETICULUM
O15321	TM9SF1	0	0	0	0	1	0	0	0	0	0	0	GOLGI APPARATUS
O15347	HMGB3	0	1	0	0	0	0	0	0	0	0	0	CHROMATIN
O15355	PPM1G	0	0	0.522397	0	0	0	0	0	0.477603	0	0	CYTOSOL
O15357	INPPL1	0	0	0.414768	0	0	0	0	0	0.585232	0	0	NUCLEUS
O15371	EIF3D	0	0	0.590489	0	0	0	0	0	0.409511	0	0	CYTOSOL
O15372	EIF3H	0	0	0.497155	0	0	0	0	0	0.502845	0	0	NUCLEUS
O15382	BCAT2	0	0	0	0	0	0	1	0	0	0	0	MITOCHONDRIA
O15394	NCAM2	0	0	0	0	0	0	0	0	0	0	1	PLASMA MEMBRANE
O15400	STX7	0	0	0	0	0	0.588018	0	0	0	0	0.411982	LYSOSOME
O15427	SLC16A3	0	0	0	0	0.221471	0	0	0	0	0	0.778529	PLASMA MEMBRANE
O15439	ABCC4	0	0	0	0	0	0.514972	0	0	0	0	0.485028	LYSOSOME
O15446-2	CD3EAP	0	1	0	0	0	0	0	0	0	0	0	CHROMATIN
O15460		0.196774	0	0	0.567076	0	0.23615	0	0	0	0	0	ENDOPLASMIC RETICULUM
O15479	MAGEB2	0.390233	0	0	0	0	0	0	0.348385	0	0.261382	0	40S/60S RIBOSOME
O15511	ARPC5	0	0	0.51466	0	0	0	0	0	0.48534	0	0	CYTOSOL
O15523	DDX3Y	0.189089	0	0	0	0	0	0	0.514721	0.29619	0	0	NUCLEOLUS
O15530		0	0	0.615663	0	0	0	0	0	0	0	0.384337	CYTOSOL
O15533-3	TAPBP	0.140224	0	0	0.337576	0.207643	0.314556	0	0	0	0	0	ENDOPLASMIC RETICULUM
O15553	MEFV	0	1	0	0	0	0	0	0	0	0	0	CHROMATIN
O43143	DHX15	0	0	0.124559	0	0	0	0	0	0.875441	0	0	NUCLEUS
O43169	CYB5B	0	0	0	1	0	0	0	0	0	0	0	ENDOPLASMIC RETICULUM
O43175	PHGDH	0	0	1	0	0	0	0	0	0	0	0	CYTOSOL
O43181	NDUFS4	0.183377	0	0	0	0	0	0.816623	0	0	0	0	MITOCHONDRIA
O43237	DYNC1LI2	0	1	0	0	0	0	0	0	0	0	0	CHROMATIN
O43242	PSMD3	0	0	0.546825	0	0	0	0	0	0.453175	0	0	CYTOSOL
O43264	ZW10	0.329553	0	0.210134	0.460312	0	0	0	0	0	0	0	ENDOPLASMIC RETICULUM
O43278		0	0	0	0	0	0	0	0	0	0	1	PLASMA MEMBRANE
O43290	SART1	0	0	0	0	0	0	0	0.590572	0.409428	0	0	NUCLEOLUS
O43292	GPAA1	0	0	0	0.774941	0	0.225059	0	0	0	0	0	ENDOPLASMIC RETICULUM
O43293	DAPK3	1	0	0	0	0	0	0	0	0	0	0	40S/60S RIBOSOME
O43303		0	0	0	0	0	0	0	0.420919	0.367881	0	0.2112	NUCLEOLUS
O43314	PPIP5K2	0	0.606985	0	0	0	0	0	0	0.393015	0	0	CHROMATIN
O43318-2		0	0	0.521452	0	0	0	0	0	0	0	0.478548	CYTOSOL
O43390	HNRNPR	0	0	0.183384	0	0	0	0	0	0.816616	0	0	NUCLEUS
O43395	PRPF3	0	0	0	0	0	0	0	0.336358	0.663642	0	0	NUCLEUS
O43396	TXNL1	0	0	1	0	0	0	0	0	0	0	0	CYTOSOL
O43399-7	TPD52L2	0	0	1	0	0	0	0	0	0	0	0	CYTOSOL
O43402	EMC8	0.256356	0	0	0.743644	0	0	0	0	0	0	0	ENDOPLASMIC RETICULUM
O43427	FIBP	0	0	0.281773	0	0.273432	0.263114	0	0	0	0	0.181682	CYTOSOL
O43432-3	EIF4G3	0	0	0	0	0	0	0	0.35955	0.64045	0	0	NUCLEUS
O43447	PPIH	0	0	0.597368	0	0	0	0	0	0.402632	0	0	CYTOSOL
O43464	HTRA2	0	0	0	0	0	0	1	0	0	0	0	MITOCHONDRIA
O43488	AKR7A2	0.280015	0	0.719985	0	0	0	0	0	0	0	0	CYTOSOL
O43491	EPB41L2	0	0	0	0	0	0	0	0	0	0	1	PLASMA MEMBRANE
O43493	TGOLN2	0	0	0	0	0.273812	0.40161	0	0	0	0	0.324579	LYSOSOME
O43504	LAMTOR5	0	0	0.140386	0	0	0.662149	0	0	0	0	0.197465	LYSOSOME
O43516	WIPF1	0	0	0	0	0	0	0	0	0	0	1	PLASMA MEMBRANE
O43566	RGS14	0	0	0.233583	0	0	0	0	0	0	0	0.766417	PLASMA MEMBRANE
O43583	DENR	0	0.355564	0.110168	0	0	0	0	0	0.534268	0	0	NUCLEUS
O43586	PSTPIP1	0	0	0	0	0.526129	0	0	0	0	0	0.473871	GOLGI APPARATUS
O43597		0	0	0	0	0	0	0	0	0	0	1	PLASMA MEMBRANE
O43598		0	0	1	0	0	0	0	0	0	0	0	CYTOSOL
O43615	TIMM44	0	0	0	0	0	0	1	0	0	0	0	MITOCHONDRIA
O43617	TRAPPC3	0	0	1	0	0	0	0	0	0	0	0	CYTOSOL
O43633	CHMP2A	0	0	0.50888	0	0	0.251143	0	0	0	0	0.239977	CYTOSOL
O43639	NCK2	0	0	0.229791	0	0	0	0	0	0	0	0.770209	PLASMA MEMBRANE
O43660	PLRG1	0.184556	0	0	0	0	0	0	0.321143	0.4943	0	0	NUCLEUS
O43663-4		0	1	0	0	0	0	0	0	0	0	0	CHROMATIN
O43665-3		0	0	1	0	0	0	0	0	0	0	0	CYTOSOL
O43670-4	ZNF207	0	0.267429	0	0	0	0	0	0.251946	0.480625	0	0	NUCLEUS
O43674	NDUFB5	0	0	0	0	0	0	1	0	0	0	0	MITOCHONDRIA
O43676	NDUFB3	0	0	0	0	0	0	1	0	0	0	0	MITOCHONDRIA
O43678	NDUFA2	0	0	0	0	0	0	1	0	0	0	0	MITOCHONDRIA
O43684-2	BUB3	0	0	0	0	0	0	0	0	1	0	0	NUCLEUS
O43707	ACTN4	0	0	0.853794	0	0	0	0	0	0	0	0.146207	CYTOSOL
O43708	GSTZ1	0.266911	0	0.367098	0	0	0	0.365991	0	0	0	0	CYTOSOL
O43709		0	0.375252	0.123351	0	0	0	0	0	0.501397	0	0	NUCLEUS
O43715	TRIAP1	0	0	0	0	0	0	1	0	0	0	0	MITOCHONDRIA
O43716	GATC	0	0	0	0	0	0	1	0	0	0	0	MITOCHONDRIA
O43719	HTATSF1	0	0	0.416535	0	0	0	0	0	0.583465	0	0	NUCLEUS
O43747	AP1G1	0	0	1	0	0	0	0	0	0	0	0	CYTOSOL
O43760-2	SYNGR2	0	0	0	0	0	0.761265	0	0	0	0	0.238735	LYSOSOME
O43765		0	0	1	0	0	0	0	0	0	0	0	CYTOSOL
O43768	ENSA	0	0	0.803787	0	0	0	0	0	0	0	0.196213	CYTOSOL
O43776	NARS	0	0	1	0	0	0	0	0	0	0	0	CYTOSOL
O43809	NUDT21	0	0	0.222078	0	0	0	0	0	0.777922	0	0	NUCLEUS
O43813	LANCL1	0	0	0.467239	0	0	0	0	0	0.532761	0	0	NUCLEUS
O43815	STRN	0.283359	0	0.44134	0	0	0.275301	0	0	0	0	0	CYTOSOL
O43818	RRP9	0	0	0	0	0	0	0	0.668162	0.331838	0	0	NUCLEOLUS
O43819	SCO2	0	0	0	0	0	0	1	0	0	0	0	MITOCHONDRIA
O43824	GTPBP6	0	0	0	0	0	0	1	0	0	0	0	MITOCHONDRIA
O43837	IDH3B	0	0	0	0	0	0	1	0	0	0	0	MITOCHONDRIA
O43847-2	NRDC	0	0	1	0	0	0	0	0	0	0	0	CYTOSOL
O43852-3	CALU	0.251634	0	0	0.29223	0.20494	0.251197	0	0	0	0	0	ENDOPLASMIC RETICULUM
O43861	ATP9B	0	0	0	0	0	0.618255	0	0	0	0	0.381745	LYSOSOME
O43865	AHCYL1	0	0	0.49277	0	0	0.348122	0	0	0	0	0.159107	CYTOSOL
O43914	TYROBP	0	0	0	0	0.255747	0	0	0	0	0	0.744253	PLASMA MEMBRANE
O43920	NDUFS5	0	0	0	0	0	0	1	0	0	0	0	MITOCHONDRIA
O60216	RAD21	0	1	0	0	0	0	0	0	0	0	0	CHROMATIN
O60220	TIMM8A	0	0	0	0	0	0	1	0	0	0	0	MITOCHONDRIA
O60231		0	0	0.186713	0	0	0	0	0.335229	0.478058	0	0	NUCLEUS
O60234	GMFG	0	0	1	0	0	0	0	0	0	0	0	CYTOSOL
O60262	GNG7	0	0	0	0	0	0	0	0	0	0	1	PLASMA MEMBRANE
O60264	SMARCA5	0	1	0	0	0	0	0	0	0	0	0	CHROMATIN
O60271	SPAG9	0	0	1	0	0	0	0	0	0	0	0	CYTOSOL
O60306	AQR	0	0	0.154952	0	0	0	0	0.273341	0.571706	0	0	NUCLEUS
O60307		0	0	0	0	0	0	0	0	0	0	1	PLASMA MEMBRANE
O60313-2	OPA1	0	0	0	0	0	0	1	0	0	0	0	MITOCHONDRIA
O60315	ZEB2	0	0.760645	0	0	0	0	0	0	0.239355	0	0	CHROMATIN
O60331-3	PIP5K1C	0	0	0	0	0	0	0	0	0	0	1	PLASMA MEMBRANE
O60337	MARCH6	0	0	0	0.688442	0	0.311558	0	0	0	0	0	ENDOPLASMIC RETICULUM
O60341	KDM1A	0	0.429343	0	0	0	0	0	0	0.570657	0	0	NUCLEUS
O60353	FZD6	0	0	0	0	0.205267	0	0	0	0	0	0.794733	PLASMA MEMBRANE
O60427	FADS1	0	0	0	0.725288	0	0.274712	0	0	0	0	0	ENDOPLASMIC RETICULUM
O60476	MAN1A2	0	0	0	0	0.663368	0	0.336632	0	0	0	0	GOLGI APPARATUS
O60488	ACSL4	0	0	0	0	1	0	0	0	0	0	0	GOLGI APPARATUS
O60493	SNX3	0	0	1	0	0	0	0	0	0	0	0	CYTOSOL
O60496	DOK2	0	0	0.818619	0	0	0	0	0	0	0	0.181381	CYTOSOL
O60503	ADCY9	0	0	0	0	0	0	0	0	0	0	1	PLASMA MEMBRANE
O60504	SORBS3	0.356217	0	0	0	0.37369	0	0	0	0	0	0.270093	GOLGI APPARATUS
O60506-4		0	0	0.562869	0	0	0	0	0	0	0	0.437131	CYTOSOL
O60524	NEMF	0	0	1	0	0	0	0	0	0	0	0	CYTOSOL
O60568	PLOD3	0.228306	0	0	0.771694	0	0	0	0	0	0	0	ENDOPLASMIC RETICULUM
O60573	EIF4E2	0	0	0.383906	0	0	0	0	0	0.616094	0	0	NUCLEUS
O60603	TLR2	0	0	0	0	0	0.286134	0	0	0	0	0.713866	PLASMA MEMBRANE
O60610	DIAPH1	0	0	1	0	0	0	0	0	0	0	0	CYTOSOL
O60613	2015-09-01	0.370631	0	0.198969	0.430399	0	0	0	0	0	0	0	ENDOPLASMIC RETICULUM
O60645-3	EXOC3	0	0	0	0	0.386421	0	0	0	0	0	0.613579	PLASMA MEMBRANE
O60664	PLIN3	0	0	1	0	0	0	0	0	0	0	0	CYTOSOL
O60669	SLC16A7	0	0	0	0	0	0	0	0	0	0	1	PLASMA MEMBRANE
O60678		0	0	1	0	0	0	0	0	0	0	0	CYTOSOL
O60701	UGDH	0	0	0.58319	0	0	0	0	0	0.41681	0	0	CYTOSOL
O60704	TPST2	0	0	0	0	0.804621	0	0	0	0	0	0.195379	GOLGI APPARATUS
O60716		0	0	0	0	0	0	0	0	0	0	1	PLASMA MEMBRANE
O60762	DPM1	0.316784	0	0	0.683216	0	0	0	0	0	0	0	ENDOPLASMIC RETICULUM
O60763	USO1	0	0	0.709199	0	0	0	0	0	0.290801	0	0	CYTOSOL
O60783	MRPS14	0	0	0	0	0	0	1	0	0	0	0	MITOCHONDRIA
O60784-2	TOM1	0	0	0.40653	0	0	0	0	0	0	0	0.59347	PLASMA MEMBRANE
O60826	CCDC22	0	0	0	0	0	0.773436	0	0	0	0	0.226564	LYSOSOME
O60828		0	0	0	0	0	0	0	0.591117	0.408883	0	0	NUCLEOLUS
O60830-2	TIMM17B	0	0	0	0	0	0	1	0	0	0	0	MITOCHONDRIA
O60832	DKC1	0	0	0	0	0	0	0	0.631729	0.368271	0	0	NUCLEOLUS
O60841	EIF5B	0	0	1	0	0	0	0	0	0	0	0	CYTOSOL
O60858-3	TRIM13	0	0	0	0.339052	0.424909	0	0	0	0	0	0.236039	GOLGI APPARATUS
O60861	GAS7	0	0	0	0	0	0	0	0	0	0	1	PLASMA MEMBRANE
O60869	EDF1	1	0	0	0	0	0	0	0	0	0	0	40S/60S RIBOSOME
O60870		0.290166	0	0	0	0	0	0	0.709834	0	0	0	NUCLEOLUS
O60879-2	DIAPH2	0	0.413186	0	0	0.411321	0	0	0	0	0	0.175493	CHROMATIN
O60884	DNAJA2	0	0	0.680924	0	0	0	0	0	0.319076	0	0	CYTOSOL
O60885	BRD4	0	1	0	0	0	0	0	0	0	0	0	CHROMATIN
O60925	PFDN1	0	0	1	0	0	0	0	0	0	0	0	CYTOSOL
O60934	NBN	0	0.731496	0	0	0	0	0	0	0.268504	0	0	CHROMATIN
O60942	RNGTT	0.295295	0	0	0	0	0	0	0	0.704705	0	0	NUCLEUS
O75027-2	ABCB7	0	0	0	0	0	0	1	0	0	0	0	MITOCHONDRIA
O75044	SRGAP2C	0	0	0.304691	0	0	0	0	0	0	0	0.695309	PLASMA MEMBRANE
O75052	NOS1AP	0	0	0	0	0	0.425517	0	0	0	0	0.574483	PLASMA MEMBRANE
O75063	FAM20B	0	0	0	0.283449	0.453343	0	0	0	0	0.263208	0	GOLGI APPARATUS
O75064	DENND4B	0	0.342208	0.286674	0	0	0	0	0	0	0	0.371118	PLASMA MEMBRANE
O75071	EFCAB14	0	0	0	0.262896	0.290462	0.314755	0	0	0	0	0.131887	LYSOSOME
O75083	WDR1	0	0	1	0	0	0	0	0	0	0	0	CYTOSOL
O75116	ROCK2	0	0	0	0	0.298939	0	0	0	0	0	0.701061	PLASMA MEMBRANE
O75127	PTCD1	0	0	0	0	0	0	1	0	0	0	0	MITOCHONDRIA
O75131	CPNE3	0	0	1	0	0	0	0	0	0	0	0	CYTOSOL
O75144-2	ICOSLG	0	0	0	0	0	0	0	0	0	0	1	PLASMA MEMBRANE
O75150	RNF40	0	0.299857	0	0	0	0	0	0.356422	0.343721	0	0	NUCLEOLUS
O75152	ZC3H11A	0	0.307011	0	0	0	0	0	0.406574	0.286414	0	0	NUCLEOLUS
O75153	CLUH	0	0	0.639255	0	0	0	0	0	0.360745	0	0	CYTOSOL
O75164	KDM4A	0	0	0.580768	0	0	0	0	0	0.419232	0	0	CYTOSOL
O75165	DNAJC13	0	0	0	0	0	0.81633	0	0	0	0	0.18367	LYSOSOME
O75167-4		0	0	0.510879	0	0	0	0	0	0.489121	0	0	CYTOSOL
O75175	CNOT3	0.633202	0	0	0.366798	0	0	0	0	0	0	0	40S/60S RIBOSOME
O75179		0.205752	0	0	0	0	0	0	0.480521	0.313726	0	0	NUCLEOLUS
O75208	COQ9	0	0	0	0	0	0	1	0	0	0	0	MITOCHONDRIA
O75251	NDUFS7	0	0	0	0	0	0	1	0	0	0	0	MITOCHONDRIA
O75298	RTN2	0	0	0	0.227028	0.424292	0.348679	0	0	0	0	0	GOLGI APPARATUS
O75306	NDUFS2	0	0	0	0	0	0	1	0	0	0	0	MITOCHONDRIA
O75312		0	0	1	0	0	0	0	0	0	0	0	CYTOSOL
O75323	GBAS	0	0	0	0	0	0	1	0	0	0	0	MITOCHONDRIA
O75330-3	HMMR	0.332995	0.667005	0	0	0	0	0	0	0	0	0	CHROMATIN
O75340		0	0	1	0	0	0	0	0	0	0	0	CYTOSOL
O75347	TBCA	0	0	1	0	0	0	0	0	0	0	0	CYTOSOL
O75348	ATP6V1G1	0	0	0.353038	0	0	0.273948	0	0	0	0	0.373014	PLASMA MEMBRANE
O75351	VPS4B	0	0	1	0	0	0	0	0	0	0	0	CYTOSOL
O75362		0	1	0	0	0	0	0	0	0	0	0	CHROMATIN
O75367	H2AFY	0	1	0	0	0	0	0	0	0	0	0	CHROMATIN
O75368	SH3BGRL	0	0	1	0	0	0	0	0	0	0	0	CYTOSOL
O75369-8	FLNB	0	0	1	0	0	0	0	0	0	0	0	CYTOSOL
O75379	VAMP4	0	0	0	0	0.21541	0.377278	0	0	0	0	0.407312	PLASMA MEMBRANE
O75380	NDUFS6	0	0	0	0	0	0	1	0	0	0	0	MITOCHONDRIA
O75381	PEX14	0	0	0	0	0	0	0.176839	0	0	0.823161	0	PEROXISOME
O75387-2		0	0	0	0	0	0	0	0	0	0	1	PLASMA MEMBRANE
O75390	CS	0	0	0	0	0	0	1	0	0	0	0	MITOCHONDRIA
O75394	MRPL33	0.173963	0	0	0	0	0	0.826037	0	0	0	0	MITOCHONDRIA
O75396	SEC22B	0	0	0	0.549133	0.220031	0.230837	0	0	0	0	0	ENDOPLASMIC RETICULUM
O75400	PRPF40A	0	0	0.255775	0	0	0	0	0	0.744225	0	0	NUCLEUS
O75410-2	TACC1	0	0	0.667008	0	0	0	0	0	0.332992	0	0	CYTOSOL
O75427	LRCH4	0	0	0	0	0	0	0	0	0	0	1	PLASMA MEMBRANE
O75436	VPS26A	0	0	0.520967	0	0	0.186097	0	0	0	0	0.292936	CYTOSOL
O75438		0	0	0	0	0	0	1	0	0	0	0	MITOCHONDRIA
O75439	PMPCB	0	0	0	0	0	0	1	0	0	0	0	MITOCHONDRIA
O75446		0	0.716193	0	0	0	0	0	0	0.283807	0	0	CHROMATIN
O75449		0	0	0.210318	0	0	0	0	0	0.789682	0	0	NUCLEUS
O75475	PSIP1	0	1	0	0	0	0	0	0	0	0	0	CHROMATIN
O75477	ERLIN1	0	0	0	1	0	0	0	0	0	0	0	ENDOPLASMIC RETICULUM
O75489	NDUFS3	0	0	0	0	0	0	1	0	0	0	0	MITOCHONDRIA
O75521	ECI2	0	0	0	0	0.291436	0	0.310015	0	0	0.398549	0	PEROXISOME
O75531	BANF1	0	0	0.385525	0	0	0	0	0	0.614475	0	0	NUCLEUS
O75533	SF3B1	0	0	0.190134	0	0	0	0	0	0.809866	0	0	NUCLEUS
O75534-4	CSDE1	0	0	1	0	0	0	0	0	0	0	0	CYTOSOL
O75592		0	0	0	0	0	0	0	1	0	0	0	NUCLEOLUS
O75608	LYPLA1	0	0	0.420125	0	0	0	0.184779	0	0.395096	0	0	CYTOSOL
O75616	ERAL1	0	0	0	0	0	0	1	0	0	0	0	MITOCHONDRIA
O75643	SNRNP200	0	0	0	0	0	0	0	0.290852	0.709148	0	0	NUCLEUS
O75663		0	0	1	0	0	0	0	0	0	0	0	CYTOSOL
O75676		0	0	0.184401	0	0	0	0	0	0.815599	0	0	NUCLEUS
O75683		0	0	0	0	0	0	0	1	0	0	0	NUCLEOLUS
O75689	ADAP1	0	0	0.422318	0	0	0	0	0	0	0	0.577682	PLASMA MEMBRANE
O75694	NUP155	0	0.364898	0.20021	0	0	0	0	0	0.434892	0	0	NUCLEUS
O75695	RP2	0	0	0	0	0	0	0	0	0	0	1	PLASMA MEMBRANE
O75717		0	0	0.543566	0	0	0	0	0	0.456434	0	0	CYTOSOL
O75718	CRTAP	0.264228	0	0	0.735772	0	0	0	0	0	0	0	ENDOPLASMIC RETICULUM
O75746	SLC25A12	0	0	0	0	0	0	1	0	0	0	0	MITOCHONDRIA
O75781	PALM	0	0	0	0	0	0	0	0	0	0	1	PLASMA MEMBRANE
O75787	ATP6AP2	0	0	0	0.76447	0	0.23553	0	0	0	0	0	ENDOPLASMIC RETICULUM
O75792		0	0	0.480748	0	0	0	0	0	0.519252	0	0	NUCLEUS
O75817		0	0	0	0	0	0	0	0.53516	0.46484	0	0	NUCLEOLUS
O75821	EIF3G	0	0	0.63432	0	0	0	0	0	0.36568	0	0	CYTOSOL
O75822	EIF3J	0	0	0.606339	0	0	0	0	0	0.393661	0	0	CYTOSOL
O75832	PSMD10	0	0	1	0	0	0	0	0	0	0	0	CYTOSOL
O75843	AP1G2	0	0	0.656126	0	0	0	0	0	0.343874	0	0	CYTOSOL
O75844	ZMPSTE24	0	0	0	1	0	0	0	0	0	0	0	ENDOPLASMIC RETICULUM
O75845	SC5D	0	0	0	0.694449	0.305551	0	0	0	0	0	0	ENDOPLASMIC RETICULUM
O75874	IDH1	0	0	1	0	0	0	0	0	0	0	0	CYTOSOL
O75879	GATB	0	0	0	0	0.264933	0	0.735067	0	0	0	0	MITOCHONDRIA
O75880	SCO1	0	0	0	0	0	0	1	0	0	0	0	MITOCHONDRIA
O75882	ATRN	0	0	0	0	0.182141	0.187679	0	0	0	0	0.63018	PLASMA MEMBRANE
O75915	ARL6IP5	0	0	0	1	0	0	0	0	0	0	0	ENDOPLASMIC RETICULUM
O75934	BCAS2	0	0.269292	0	0	0	0	0	0.359085	0.371623	0	0	NUCLEUS
O75937	DNAJC8	0	0.298007	0	0	0	0	0	0	0.701993	0	0	NUCLEUS
O75940	SMNDC1	0	0	0	0	0	0	0	0.235026	0.555505	0	0.209469	NUCLEUS
O75947	ATP5H	0	0	0	0	0	0	1	0	0	0	0	MITOCHONDRIA
O75955	FLOT1	0	0	0	0	0	0.64503	0	0	0	0	0.35497	LYSOSOME
O75964	ATP5L	0	0	0	0	0	0	1	0	0	0	0	MITOCHONDRIA
O75976	CPD	0	0	0	0	0	0.358322	0	0	0	0	0.641678	PLASMA MEMBRANE
O76021	RSL1D1	0	0	0	0	0	0	0	1	0	0	0	NUCLEOLUS
O76031	CLPX	0	0	0	0	0	0	1	0	0	0	0	MITOCHONDRIA
O76071	CIAO1	0	0	1	0	0	0	0	0	0	0	0	CYTOSOL
O76094	SRP72	0	0.266807	0.293455	0	0	0	0	0	0.439737	0	0	NUCLEUS
O76096		0.156051	0	0	0	0	0.589187	0	0	0	0	0.254761	LYSOSOME
O94759	TRPM2	0	0	0	0.22493	0.21577	0.465074	0	0	0	0	0.0942266	LYSOSOME
O94766	B3GAT3	0	0	0	0	0.584434	0	0.19089	0	0	0.224676	0	GOLGI APPARATUS
O94776	MTA2	0	0.248621	0.114836	0	0	0	0	0	0.636543	0	0	NUCLEUS
O94804	STK10	0	0.329563	0	0	0.328418	0	0	0	0	0	0.342018	PLASMA MEMBRANE
O94819	KBTBD11	0	0.398366	0.182051	0	0	0	0	0	0.419583	0	0	NUCLEUS
O94826	TOMM70	0	0	0	0	0	0	1	0	0	0	0	MITOCHONDRIA
O94851-4	MICAL2	0.207209	0	0	0.555838	0.236953	0	0	0	0	0	0	ENDOPLASMIC RETICULUM
O94855-2	SEC24D	0	0	0.444141	0	0	0	0	0	0.555859	0	0	NUCLEUS
O94874	UFL1	0	0	0	1	0	0	0	0	0	0	0	ENDOPLASMIC RETICULUM
O94885	SASH1	0	0	0.499748	0	0	0	0	0	0	0	0.500252	PLASMA MEMBRANE
O94886	TMEM63A	0	0	0	0	0	0.479521	0	0	0	0	0.520479	PLASMA MEMBRANE
O94903	PROSC	0	0	0.697424	0	0	0	0	0	0.302576	0	0	CYTOSOL
O94905	ERLIN2	0	0	0	1	0	0	0	0	0	0	0	ENDOPLASMIC RETICULUM
O94906	PRPF6	0	0	0	0	0	0	0	0.330777	0.669223	0	0	NUCLEUS
O94915	FRYL	0	0	0.744124	0	0	0	0	0	0	0	0.255876	CYTOSOL
O94919	ENDOD1	0	0	0	0.346276	0.264797	0.388927	0	0	0	0	0	LYSOSOME
O94925-3	GLS	0	0	0	0	0	0	1	0	0	0	0	MITOCHONDRIA
O94927		0	0.460893	0	0	0	0	0	0	0.539107	0	0	NUCLEUS
O94966-5	USP19	0	0	1	0	0	0	0	0	0	0	0	CYTOSOL
O94979		0	0	0.335337	0	0	0	0	0	0.664663	0	0	NUCLEUS
O94986		0	0.783742	0	0	0	0	0.216258	0	0	0	0	CHROMATIN
O95104	SCAF4	0	0.210657	0	0	0	0	0	0.378659	0.410684	0	0	NUCLEUS
O95139	NDUFB6	0	0	0	0	0	0	1	0	0	0	0	MITOCHONDRIA
O95140	MFN2	0	0	0	0	0	0	1	0	0	0	0	MITOCHONDRIA
O95159	ZFPL1	0	0	0	0.259156	0.505986	0	0.234858	0	0	0	0	GOLGI APPARATUS
O95163	IKBKAP	0	0	1	0	0	0	0	0	0	0	0	CYTOSOL
O95168	NDUFB4	0	0	0	0	0	0	1	0	0	0	0	MITOCHONDRIA
O95169	NDUFB8	0	0	0	0	0	0	1	0	0	0	0	MITOCHONDRIA
O95182	NDUFA7	0.160237	0	0	0	0	0	0.839763	0	0	0	0	MITOCHONDRIA
O95202	LETM1	0	0	0	0	0	0	1	0	0	0	0	MITOCHONDRIA
O95210	STBD1	0	0	0	0.467524	0.335973	0.196503	0	0	0	0	0	ENDOPLASMIC RETICULUM
O95219		0	0	0.464201	0	0	0.362787	0	0	0	0	0.173012	CYTOSOL
O95232	LUC7L3	0	0	0.197678	0	0	0	0	0	0.802322	0	0	NUCLEUS
O95239	KIF4B	0	1	0	0	0	0	0	0	0	0	0	CHROMATIN
O95248-4	SBF1	0.217817	0	0	0	0.478683	0	0	0	0	0	0.303501	GOLGI APPARATUS
O95249	GOSR1	0	0	0	0	0.671461	0.328539	0	0	0	0	0	GOLGI APPARATUS
O95251		0	1	0	0	0	0	0	0	0	0	0	CHROMATIN
O95292	VAPB	0	0	0	0.682228	0.317772	0	0	0	0	0	0	ENDOPLASMIC RETICULUM
O95298	NDUFC2-KCTD14	0	0	0	0	0	0	0.783949	0	0	0.216051	0	MITOCHONDRIA
O95299	NDUFA10	0	0	0	0	0	0	1	0	0	0	0	MITOCHONDRIA
O95302		0.179768	0	0	0.575186	0	0.245045	0	0	0	0	0	ENDOPLASMIC RETICULUM
O95319-3		0	0.251374	0.133048	0	0	0	0	0	0.615579	0	0	NUCLEUS
O95336	PGLS	0	0	1	0	0	0	0	0	0	0	0	CYTOSOL
O95347	SMC2	0	1	0	0	0	0	0	0	0	0	0	CHROMATIN
O95352		0	0	1	0	0	0	0	0	0	0	0	CYTOSOL
O95372	LYPLA2	0	0	1	0	0	0	0	0	0	0	0	CYTOSOL
O95373	IPO7	0	0	1	0	0	0	0	0	0	0	0	CYTOSOL
O95400	CD2BP2	0	0	0	0	0	0	0	0.300558	0.699442	0	0	NUCLEUS
O95429		0	0	0.875118	0	0	0	0	0	0	0	0.124882	CYTOSOL
O95433	AHSA1	0	0	1	0	0	0	0	0	0	0	0	CYTOSOL
O95450	ADAMTS2	0	0	0	0	0.404531	0.329425	0	0	0	0	0.266044	GOLGI APPARATUS
O95456		0	0	1	0	0	0	0	0	0	0	0	CYTOSOL
O95466-3		0	0	0.677601	0	0	0	0	0	0	0	0.322399	CYTOSOL
O95477	ABCA1	0	0	0	0	0.182889	0.243128	0	0	0	0	0.573983	PLASMA MEMBRANE
O95479	H6PD	0.254103	0	0	0.519886	0	0.226011	0	0	0	0	0	ENDOPLASMIC RETICULUM
O95486	SEC24A	0.352731	0	0.647269	0	0	0	0	0	0	0	0	CYTOSOL
O95487-3	SEC24B	0	0	0	0	1	0	0	0	0	0	0	GOLGI APPARATUS
O95571	ETHE1	0	0	0	0	0	0	1	0	0	0	0	MITOCHONDRIA
O95573	ACSL3	0	0	0	1	0	0	0	0	0	0	0	ENDOPLASMIC RETICULUM
O95602	POLR1A	0	0.59381	0	0	0	0	0	0	0.40619	0	0	CHROMATIN
O95613	PCNT	0	0.765401	0	0	0	0	0	0	0	0.234599	0	CHROMATIN
O95619		0	1	0	0	0	0	0	0	0	0	0	CHROMATIN
O95684-2		0	0.450657	0	0	0	0	0	0	0.549343	0	0	NUCLEUS
O95714	HERC2	0.490309	0	0	0.509692	0	0	0	0	0	0	0	ENDOPLASMIC RETICULUM
O95716	RAB3D	0	0	0	0.568774	0.259869	0	0.171357	0	0	0	0	ENDOPLASMIC RETICULUM
O95721	SNAP29	0	0	0	0	0.276099	0.36398	0	0	0	0	0.359921	LYSOSOME
O95747	OXSR1	0	0	1	0	0	0	0	0	0	0	0	CYTOSOL
O95757	HSPA4L	0	0	1	0	0	0	0	0	0	0	0	CYTOSOL
O95758-4	PTBP3	0	0.441078	0	0	0	0	0	0	0.558922	0	0	NUCLEUS
O95772		0	0	0	0	0	0.442586	0	0	0	0	0.557414	PLASMA MEMBRANE
O95782	AP2A1	0	0	0	0	0	0.759414	0	0	0	0	0.240586	LYSOSOME
O95793	STAU1	1	0	0	0	0	0	0	0	0	0	0	40S/60S RIBOSOME
O95816	BAG2	0.298415	0	0.35769	0	0	0	0	0	0.343895	0	0	CYTOSOL
O95817	BAG3	0	0	0.497982	0	0	0	0	0	0	0	0.502018	PLASMA MEMBRANE
O95819-3	MAP4K4	0	0	0	0	0	0	0	0	0	0	1	PLASMA MEMBRANE
O95822	MLYCD	0	0	0	0	0	0	1	0	0	0	0	MITOCHONDRIA
O95825	CRYZL1	0	0	0.393054	0	0	0	0	0	0.606945	0	0	NUCLEUS
O95831	AIFM1	0	0	0	0	0	0	1	0	0	0	0	MITOCHONDRIA
O95861	BPNT1	0	0	1	0	0	0	0	0	0	0	0	CYTOSOL
O95864	FADS2	0	0	0	0.788582	0	0	0.211418	0	0	0	0	ENDOPLASMIC RETICULUM
O95865	DDAH2	0	0	0.27476	0	0	0	0	0	0	0	0.72524	PLASMA MEMBRANE
O95870	ABHD16A	0	0	0	0.75717	0	0	0	0	0	0.24283	0	ENDOPLASMIC RETICULUM
O95881	TXNDC12	0.286889	0	0.175472	0.537639	0	0	0	0	0	0	0	ENDOPLASMIC RETICULUM
O95900	TRUB2	0	0	0	0	0.347184	0	0.652816	0	0	0	0	MITOCHONDRIA
O95980	RECK	0	0	0	0	0	0	0	0	0	0	1	PLASMA MEMBRANE
O96000	NDUFB10	0	0	0	0	0	0	1	0	0	0	0	MITOCHONDRIA
O96005	CLPTM1	0	0	0	1	0	0	0	0	0	0	0	ENDOPLASMIC RETICULUM
O96008	TOMM40	0	0	0	0	0	0	1	0	0	0	0	MITOCHONDRIA
O96011	PEX11B	0	0	0	0	0	0	0.320957	0	0	0.679043	0	PEROXISOME
O96013	PAK4	0	0	0	0	0.275932	0	0	0	0	0	0.724068	PLASMA MEMBRANE
O96019	ACTL6A	0	0	0.148033	0	0	0	0	0	0.851967	0	0	NUCLEUS
P00167	CYB5A	0	0	0	0.78548	0	0	0.21452	0	0	0	0	ENDOPLASMIC RETICULUM
P00338-3	LDHA	0	0	1	0	0	0	0	0	0	0	0	CYTOSOL
P00367	GLUD1	0	0	0	0	0	0	1	0	0	0	0	MITOCHONDRIA
P00387-3	CYB5R3	0	0	0	0.599034	0	0	0.131731	0	0	0.269235	0	ENDOPLASMIC RETICULUM
P00390		0.290934	0	0.352209	0	0	0	0	0	0.356858	0	0	NUCLEUS
P00403		0	0	0	0	0	0	1	0	0	0	0	MITOCHONDRIA
P00441	SOD1	0	0	1	0	0	0	0	0	0	0	0	CYTOSOL
P00491	PNP	0	0	1	0	0	0	0	0	0	0	0	CYTOSOL
P00492	HPRT1	0	0	1	0	0	0	0	0	0	0	0	CYTOSOL
P00505	GOT2	0	0	0	0	0	0	1	0	0	0	0	MITOCHONDRIA
P00519-2	ABL1	0	0.363083	0	0	0	0	0	0	0	0	0.636917	PLASMA MEMBRANE
P00558	PGK1.00	0	0	0.414974	0	0	0	0	0	0	0	0.585026	PLASMA MEMBRANE
P00746	CFD	0	0	0	0	0	0.20344	0	0	0	0	0.79656	PLASMA MEMBRANE
P00747	PLG	0	0.630644	0	0	0	0	0	0	0	0.369356	0	CHROMATIN
P00749	PLAU	0	0	0	0	0	0	0	0	0	0	1	PLASMA MEMBRANE
P00846	MT-ATP6	0	0	0	0	0	0	1	0	0	0	0	MITOCHONDRIA
P00918	CA2	0	0	1	0	0	0	0	0	0	0	0	CYTOSOL
P00966	ASS1	0	0	0.528321	0	0	0	0	0	0.471679	0	0	CYTOSOL
P00973	OAS1	0	0	0	0.501659	0.303964	0	0.194378	0	0	0	0	ENDOPLASMIC RETICULUM
P01019		0.197173	0	0.180321	0	0.37404	0.248466	0	0	0	0	0	GOLGI APPARATUS
P01034	CST3	0	0	0	0	0	0.811981	0	0	0	0	0.188019	LYSOSOME
P01111	NRAS	0	0	0.211268	0	0	0	0	0	0	0	0.788732	PLASMA MEMBRANE
P01112	HRAS	0	0	0	0	0	0	0	0	0	0	1	PLASMA MEMBRANE
P01116-2		0	0	0	0	0	0	0	0	0	0	1	PLASMA MEMBRANE
P01130	LDLR	0	0	0	0	0.225834	0.423417	0	0	0	0	0.350749	LYSOSOME
P01137	TGFB1	0.292835	0	0	0.472596	0	0.234569	0	0	0	0	0	ENDOPLASMIC RETICULUM
P01892	HLA-A	0	0	0	0	0	0.172416	0	0	0	0	0.827584	PLASMA MEMBRANE
P02042	HBD	0	0.549511	0	0	0	0	0	0	0	0.450489	0	CHROMATIN
P02545	LMNA	0	0.769863	0	0	0	0	0	0	0	0.230137	0	CHROMATIN
P02649	APOE	0	0	0	0.360944	0.639056	0	0	0	0	0	0	GOLGI APPARATUS
P02655	APOC2	0.256017	0	0	0.319728	0	0	0.424255	0	0	0	0	MITOCHONDRIA
P02686	MBP	0	0	0	0	0	0	0	0	0	0	1	PLASMA MEMBRANE
P02765	AHSG	0	0	0.38574	0	0	0	0	0	0.61426	0	0	NUCLEUS
P02786	TFRC	0	0	0	0	0	0.692884	0	0	0	0	0.307116	LYSOSOME
P02788		0	0	0	0	0	0.369138	0	0	0	0	0.630862	PLASMA MEMBRANE
P02792	FTL	0	0	0.215955	0	0	0.784045	0	0	0	0	0	LYSOSOME
P02794	FTH1	0	0	0.380411	0	0	0.501343	0	0	0	0	0.118246	LYSOSOME
P03973		0	0	0	0	0.33566	0.258081	0	0	0	0	0.406259	PLASMA MEMBRANE
P04035-3	HMGCR	0.178884	0	0	0.603468	0	0.217648	0	0	0	0	0	ENDOPLASMIC RETICULUM
P04040	CAT	0.484017	0.339008	0.176974	0	0	0	0	0	0	0	0	40S/60S RIBOSOME
P04049		0	0	1	0	0	0	0	0	0	0	0	CYTOSOL
P04062	GBA	0	0	0	0	0.200398	0.799602	0	0	0	0	0	LYSOSOME
P04075	ALDOA	0	0	1	0	0	0	0	0	0	0	0	CYTOSOL
P04080	CSTB	0	0	1	0	0	0	0	0	0	0	0	CYTOSOL
P04083	ANXA1	0	0	1	0	0	0	0	0	0	0	0	CYTOSOL
P04179	SOD2	0	0	0	0	0	0	1	0	0	0	0	MITOCHONDRIA
P04181	OAT	0	0	0	0	0	0	1	0	0	0	0	MITOCHONDRIA
P04183	TK1	0	0	0.703029	0	0	0	0	0	0	0	0.296971	CYTOSOL
P04406	GAPDH	0	0	0.469503	0	0	0	0	0	0.530497	0	0	NUCLEUS
P04632	CAPNS1	0	0	1	0	0	0	0	0	0	0	0	CYTOSOL
P04792	HSPB1	0	0	1	0	0	0	0	0	0	0	0	CYTOSOL
P04818	TYMS	0	0	0.654601	0	0	0	0	0	0.345399	0	0	CYTOSOL
P04839	CYBB	0	0	0	0	0	0.211435	0	0	0	0	0.788565	PLASMA MEMBRANE
P04843	RPN1	0	0	0	1	0	0	0	0	0	0	0	ENDOPLASMIC RETICULUM
P04899-3	GNAI2	0	0	0	0	0	0	0	0	0	0	1	PLASMA MEMBRANE
P04920	SLC4A2	0	0	0	0	0	0.35008	0	0	0	0	0.64992	PLASMA MEMBRANE
P04921	GYPC	0	0	0	0	0	0	0	0	0	0	1	PLASMA MEMBRANE
P05023	ATP1A2	0	0	0	0	0	0	0	0	0	0	1	PLASMA MEMBRANE
P05067	APP	0	0	0	0.182311	0.362886	0.166392	0	0	0	0	0.288411	GOLGI APPARATUS
P05091	ALDH2	0	0	0	0	0	0	1	0	0	0	0	MITOCHONDRIA
P05107	ITGB2	0	0	0	0.416264	0.314634	0.269102	0	0	0	0	0	ENDOPLASMIC RETICULUM
P05114	HMGN1	0	0.61464	0	0	0	0	0	0	0.38536	0	0	CHROMATIN
P05141	SLC25A5	0	0	0	0	0	0	1	0	0	0	0	MITOCHONDRIA
P05161	ISG15	0	0	1	0	0	0	0	0	0	0	0	CYTOSOL
P05165	PCCA	0	0	0	0	0	0	1	0	0	0	0	MITOCHONDRIA
P05166-2	PCCB	0	0	0	0	0	0	1	0	0	0	0	MITOCHONDRIA
P05198	EIF2S1	0	0	0.133615	0	0	0	0	0	0.866385	0	0	NUCLEUS
P05204	HMGN2	0	0.692245	0	0	0	0	0	0	0.307755	0	0	CHROMATIN
P05362	ICAM1	0	0	0	0	0	0	0	0	0	0	1	PLASMA MEMBRANE
P05387	RPLP2	0	0.255664	0.230746	0	0	0	0.140521	0	0.37307	0	0	NUCLEUS
P05388	RPLP0	1	0	0	0	0	0	0	0	0	0	0	40S/60S RIBOSOME
P05455	SSB	0	0	0.719177	0	0	0	0	0	0.280823	0	0	CYTOSOL
P05556	ITGB1	0	0	0	0	0	0	0	0	0	0	1	PLASMA MEMBRANE
P05771-2	PRKCB	0	0	0.855832	0	0	0	0	0	0	0	0.144168	CYTOSOL
P06132		0	0	1	0	0	0	0	0	0	0	0	CYTOSOL
P06213-2		0	0	0	0	0	0	0	0	0	0	1	PLASMA MEMBRANE
P06241-2		0	0	0	0	0	0	0	0	0	0	1	PLASMA MEMBRANE
P06280	GLA	0	0	0	0.252729	0	0.747271	0	0	0	0	0	LYSOSOME
P06396	GSN	0	0	0	0	0	0	0	0	0	0	1	PLASMA MEMBRANE
P06396-2		0	0	0.860978	0	0	0	0	0	0	0	0.139022	CYTOSOL
P06400	RB1	0	0.683071	0	0	0	0	0	0	0.316929	0	0	CHROMATIN
P06454	PTMA	0	0	1	0	0	0	0	0	0	0	0	CYTOSOL
P06493	CDK1	0	0	0.36475	0	0	0	0	0	0.63525	0	0	NUCLEUS
P06576	ATP5B	0	0	0	0	0	0	1	0	0	0	0	MITOCHONDRIA
P06702	S100A9	0	0	0.714004	0	0	0	0	0	0.285996	0	0	CYTOSOL
P06703		0	0	1	0	0	0	0	0	0	0	0	CYTOSOL
P06733	ENO1	0	0	1	0	0	0	0	0	0	0	0	CYTOSOL
P06734		0	0	0	0	0	0	0	0	0	0	1	PLASMA MEMBRANE
P06737	PYGL	0	0	1	0	0	0	0	0	0	0	0	CYTOSOL
P06744	GPI	0	0	1	0	0	0	0	0	0	0	0	CYTOSOL
P06753	TPM3	0	0	1	0	0	0	0	0	0	0	0	CYTOSOL
P06753-2	TPM3	0	0	1	0	0	0	0	0	0	0	0	CYTOSOL
P06756	ITGAV	0	0	0	0	0.20999	0	0	0	0	0	0.79001	PLASMA MEMBRANE
P06865	HEXA	0	0	0	0	0.2657	0.7343	0	0	0	0	0	LYSOSOME
P07099	EPHX1	0	0	0	1	0	0	0	0	0	0	0	ENDOPLASMIC RETICULUM
P07195	LDHB	0	0	1	0	0	0	0	0	0	0	0	CYTOSOL
P07203	GPX1	0	0	0.337739	0	0	0	0.161609	0	0.500652	0	0	NUCLEUS
P07204	THBD	0	0	0	0	0	0	0	0	0	0	1	PLASMA MEMBRANE
P07225	PROS1	0.180017	0	0	0.614676	0	0.205307	0	0	0	0	0	ENDOPLASMIC RETICULUM
P07237	P4HB	0.249111	0	0	0.524861	0	0.226028	0	0	0	0	0	ENDOPLASMIC RETICULUM
P07305	H1F0	0	1	0	0	0	0	0	0	0	0	0	CHROMATIN
P07332	FES	0	0.675646	0	0	0.324354	0	0	0	0	0	0	CHROMATIN
P07333	CSF1R	0	0	0	0	0	0	0	0	0	0	1	PLASMA MEMBRANE
P07339	CTSD	0	0	0	0	0	0.887695	0	0	0	0	0.112305	LYSOSOME
P07355-2	ANXA2P2	0	0	0	0	0	0.237696	0	0	0	0	0.762304	PLASMA MEMBRANE
P07384	CAPN1	0	0	1	0	0	0	0	0	0	0	0	CYTOSOL
P07437	TUBB	0	0	1	0	0	0	0	0	0	0	0	CYTOSOL
P07477		0	0	0	0	0.276166	0	0	0	0	0	0.723834	PLASMA MEMBRANE
P07602-3	PSAP	0	0	0	0	0.257174	0.742826	0	0	0	0	0	LYSOSOME
P07686	HEXB	0	0	0	0	0	0.814645	0	0	0	0	0.185355	LYSOSOME
P07711	CTSL	0	0	0	0	0	0.733146	0	0	0	0	0.266854	LYSOSOME
P07737	PFN1	0	0	1	0	0	0	0	0	0	0	0	CYTOSOL
P07741	APRT	0	0	1	0	0	0	0	0	0	0	0	CYTOSOL
P07814	EPRS	0	0	0.731233	0	0	0	0	0	0.268767	0	0	CYTOSOL
P07858	CTSB	0	0	0	0	0	1	0	0	0	0	0	LYSOSOME
P07900-2	HSP90AA1	0	0	1	0	0	0	0	0	0	0	0	CYTOSOL
P07902	GALT	0	0	1	0	0	0	0	0	0	0	0	CYTOSOL
P07910-2	HNRNPC	0	0.193718	0	0	0	0	0	0.461167	0.345115	0	0	NUCLEOLUS
P07919	UQCRH	0	0	0	0	0	0	1	0	0	0	0	MITOCHONDRIA
P07947	YES1	0	0	0	0	0	0	0	0	0	0	1	PLASMA MEMBRANE
P07948		0	0	0	0	0	0	0	0	0	0	1	PLASMA MEMBRANE
P07954-2		0	0	0	0	0	0	1	0	0	0	0	MITOCHONDRIA
P07996	THBS1	0	0	0	0	0	0.292037	0	0	0	0	0.707963	PLASMA MEMBRANE
P08133	ANXA6	0	0	0.727225	0	0	0	0	0	0	0	0.272775	CYTOSOL
P08134	RHOC	0	0	0.588227	0	0	0	0	0	0	0	0.411773	CYTOSOL
P08174-2	CD55	0	0	0	0	0	0	0	0	0	0	1	PLASMA MEMBRANE
P08195-2	SLC3A2	0	0	0	0	0	0.3686	0	0	0	0	0.6314	PLASMA MEMBRANE
P08236	GUSB	0	0	0	0.255842	0.290621	0.453537	0	0	0	0	0	LYSOSOME
P08238	HSP90AB1	0	0	1	0	0	0	0	0	0	0	0	CYTOSOL
P08240	SRPRA	0	0	0	0.638999	0	0	0.13122	0	0	0.229781	0	ENDOPLASMIC RETICULUM
P08243	ASNS	0	0	1	0	0	0	0	0	0	0	0	CYTOSOL
P08246	ELANE	0	0	0	0	0.36024	0.398222	0	0	0	0	0.241538	LYSOSOME
P08311	CTSG	0	0	0	0	0.190153	0.361636	0	0	0	0	0.448211	PLASMA MEMBRANE
P08397	HMBS	0	0	1	0	0	0	0	0	0	0	0	CYTOSOL
P08559	PDHA1	0	0	0	0	0	0	1	0	0	0	0	MITOCHONDRIA
P08567	PLEK	0	0	0.477003	0	0	0	0	0	0	0	0.522997	PLASMA MEMBRANE
P08571	CD14	0	0	0	0	0	0	0	0	0	0	1	PLASMA MEMBRANE
P08574	CYC1	0	0	0	0	0	0	1	0	0	0	0	MITOCHONDRIA
P08575	PTPRC	0	0	0	0	0	0	0	0	0	0	1	PLASMA MEMBRANE
P08579	SNRPB2	0	0	0.189384	0	0	0	0	0	0.810616	0	0	NUCLEUS
P08582	MELTF	0	0	0	0	0	0	0	0	0	0	1	PLASMA MEMBRANE
P08588		0	0	0	0	0	0	0	0	0	0	1	PLASMA MEMBRANE
P08621	SNRNP70	0	0	0	0	0	0	0	0	1	0	0	NUCLEUS
P08631	HCK	0	0	0	0	0	0	0	0	0	0	1	PLASMA MEMBRANE
P08648	ITGA5	0	0	0	0	0	0	0	0	0	0	1	PLASMA MEMBRANE
P08670	VIM	0	0	0.11938	0	0	0	0	0	0.88062	0	0	NUCLEUS
P08708	RPS17	1	0	0	0	0	0	0	0	0	0	0	40S/60S RIBOSOME
P08754	GNAI3	0	0	0	0	0	0	0	0	0	0	1	PLASMA MEMBRANE
P08758	ANXA5	0	0	1	0	0	0	0	0	0	0	0	CYTOSOL
P08865	RPSA	1	0	0	0	0	0	0	0	0	0	0	40S/60S RIBOSOME
P08887	IL6R	0	0	0	0	0	0.312852	0	0	0	0	0.687148	PLASMA MEMBRANE
P08962	CD63	0	0	0	0	0.330076	0.502081	0	0	0	0	0.167843	LYSOSOME
P09001	MRPL3	0	0	0	0	0	0	1	0	0	0	0	MITOCHONDRIA
P09012	SNRPA	0	0	0.124336	0	0	0	0	0.368288	0.507376	0	0	NUCLEUS
P09110	ACAA1	0.323471	0	0	0	0	0	0	0	0	0.676529	0	PEROXISOME
P09132	SRP19	0.490898	0	0.16779	0	0	0	0	0	0.341312	0	0	40S/60S RIBOSOME
P09211	GSTP1	0	0	1	0	0	0	0	0	0	0	0	CYTOSOL
P09382	LGALS1	0	0	1	0	0	0	0	0	0	0	0	CYTOSOL
P09417	QDPR	0	0	0.461868	0	0	0	0	0	0.538132	0	0	NUCLEUS
P09429	HMGB1	0	1	0	0	0	0	0	0	0	0	0	CHROMATIN
P09496-2	CLTA	0	0	0	0	0.277933	0.214689	0	0	0	0	0.507378	PLASMA MEMBRANE
P09497-2	CLTB	0.284096	0	0.715904	0	0	0	0	0	0	0	0	CYTOSOL
P09525	ANXA4	0	0	0.708514	0	0	0	0	0	0	0	0.291486	CYTOSOL
P09543-2		0	0	0	0	0.27653	0.176883	0	0	0	0	0.546587	PLASMA MEMBRANE
P09601	HMOX1	0.201142	0	0	0.798858	0	0	0	0	0	0	0	ENDOPLASMIC RETICULUM
P09622	DLD	0	0	0	0	0	0	1	0	0	0	0	MITOCHONDRIA
P09661	SNRPA1	0	0	0.196184	0	0	0	0	0	0.803816	0	0	NUCLEUS
P09669	COX6C	0.16961	0	0	0	0	0	0.83039	0	0	0	0	MITOCHONDRIA
P09769	FGR	0	0	0	0	0	0	0	0	0	0	1	PLASMA MEMBRANE
P09874	PARP1	0	1	0	0	0	0	0	0	0	0	0	CHROMATIN
P09958	FURIN	0	0	0	0	0	0.187999	0	0	0	0	0.812001	PLASMA MEMBRANE
P09960		0	0	1	0	0	0	0	0	0	0	0	CYTOSOL
P09972	ALDOC	0	0	1	0	0	0	0	0	0	0	0	CYTOSOL
P0C0S5	H2AFV	0	0.766639	0	0	0	0	0	0	0.233361	0	0	CHROMATIN
P0C7P0	CISD3	0	0	0	0	0	0	1	0	0	0	0	MITOCHONDRIA
P0CG08		0	0	0	0.399423	0.231525	0	0.1572	0	0	0.211852	0	ENDOPLASMIC RETICULUM
P0CG12	CHTF8	0.681571	0	0	0	0	0	0	0	0	0	0.318429	40S/60S RIBOSOME
P0DMV9	HSPA1B	0	0	1	0	0	0	0	0	0	0	0	CYTOSOL
P10109	FDX1	0	0	0	0	0	0	0.790919	0	0	0.209081	0	MITOCHONDRIA
P10124	SRGN	0	0	0	0	0	0	0	0	0	0	1	PLASMA MEMBRANE
P10153	RNASE2	0	0	0	0	0.217383	0.654954	0	0	0	0	0.127663	LYSOSOME
P10253	GAA	0	0	0	0	0	1	0	0	0	0	0	LYSOSOME
P10301	RRAS	0	0	0	0	0	0	0	0	0	0	1	PLASMA MEMBRANE
P10398	ARAF	0	0	0.794264	0	0	0	0	0	0	0	0.205736	CYTOSOL
P10412	HIST1H1E	0	0.888592	0	0	0	0	0.111408	0	0	0	0	CHROMATIN
P10415	BCL2	0	0	0	0.765616	0	0.234384	0	0	0	0	0	ENDOPLASMIC RETICULUM
P10515	DLAT	0	0	0	0	0	0	1	0	0	0	0	MITOCHONDRIA
P10586	PTPRF	0	0	0	0	0	0	0	0	0	0	1	PLASMA MEMBRANE
P10599	TXN	0	0	1	0	0	0	0	0	0	0	0	CYTOSOL
P10606	COX5B	0	0	0	0	0	0	1	0	0	0	0	MITOCHONDRIA
P10619	CTSA	0	0	0	0	0.214191	0.785809	0	0	0	0	0	LYSOSOME
P10620	MGST1	0.155826	0	0	0.388076	0.192907	0	0	0	0	0.263191	0	ENDOPLASMIC RETICULUM
P10644	PRKAR1A	0	0	0.618556	0	0	0	0	0	0	0	0.381444	CYTOSOL
P10768	ESD	0	0	1	0	0	0	0	0	0	0	0	CYTOSOL
P10809	HSPD1	0	0	0	0	0	0	1	0	0	0	0	MITOCHONDRIA
P11021	HSPA5	0.210642	0	0	0.47125	0	0.318108	0	0	0	0	0	ENDOPLASMIC RETICULUM
P11047	LAMC1	0.194963	0	0	0.805037	0	0	0	0	0	0	0	ENDOPLASMIC RETICULUM
P11049	CD37	0	0	0	0	0.384911	0.267627	0	0	0	0	0.347462	GOLGI APPARATUS
P11117	ACP2	0	0	0	0	0	0.793171	0	0	0	0	0.206829	LYSOSOME
P11142	HSPA8	0	0	1	0	0	0	0	0	0	0	0	CYTOSOL
P11166	SLC2A1	0	0	0	0	0	0	0	0	0	0	1	PLASMA MEMBRANE
P11171	EPB41	0	0	0	0	0	0	0	0	0	0	1	PLASMA MEMBRANE
P11172	UMPS	0	0	0.641353	0	0	0	0	0	0.358647	0	0	CYTOSOL
P11177	PDHB	0	0	0	0	0	0	1	0	0	0	0	MITOCHONDRIA
P11182	DBT	0	0	0	0	0	0	1	0	0	0	0	MITOCHONDRIA
P11215-2	ITGAM	0	0	0	0	0	0	0	0	0	0	1	PLASMA MEMBRANE
P11216		0	0	0.738742	0	0	0	0	0	0.261258	0	0	CYTOSOL
P11233	RALA	0	0	0	0	0	0.224569	0	0	0	0	0.775431	PLASMA MEMBRANE
P11234-2	RALB	0	0	0	0	0	0	0	0	0	0	1	PLASMA MEMBRANE
P11274	BCR	0	0	0	0	0	0	0	0	0	0	1	PLASMA MEMBRANE
P11279	LAMP1	0	0	0	0	0	0.851427	0	0	0	0	0.148573	LYSOSOME
P11310-2	ACADM	0	0	0	0	0	0	1	0	0	0	0	MITOCHONDRIA
P11387	TOP1.00	0	1	0	0	0	0	0	0	0	0	0	CHROMATIN
P11388-4	TOP2A	0	1	0	0	0	0	0	0	0	0	0	CHROMATIN
P11413-2	G6PD	0	0	1	0	0	0	0	0	0	0	0	CYTOSOL
P11498	PC	0	0	0	0	0	0	0.756566	0	0	0.243434	0	MITOCHONDRIA
P11586	MTHFD1	1	0	0	0	0	0	0	0	0	0	0	40S/60S RIBOSOME
P11717	IGF2R	0	0	0	0	0.182754	0.722153	0	0	0	0	0.0950927	LYSOSOME
P11908		0	0	0.671099	0	0	0	0	0	0.328901	0	0	CYTOSOL
P11940	PABPC3	0	0	0.351096	0	0	0	0	0	0.648904	0	0	NUCLEUS
P12004	PCNA	0	0	0.398739	0	0	0	0	0	0.601261	0	0	NUCLEUS
P12081	HARS	0	0	0.513464	0	0	0	0	0	0.486536	0	0	CYTOSOL
P12109	COL6A1	0.273577	0	0	0.726423	0	0	0	0	0	0	0	ENDOPLASMIC RETICULUM
P12236	SLC25A6	0	0	0	0	0	0	1	0	0	0	0	MITOCHONDRIA
P12268	IMPDH2	0	0	0.451286	0	0	0	0	0	0.548714	0	0	NUCLEUS
P12270	TPR	0	0	0.469012	0	0	0	0	0	0.530988	0	0	NUCLEUS
P12277		0	0	1	0	0	0	0	0	0	0	0	CYTOSOL
P12314	FCGR1A	0	0	0	0	0.220222	0.241533	0	0	0	0	0.538245	PLASMA MEMBRANE
P12318	FCGR2A	0	0	0	0	0	0	0	0	0	0	1	PLASMA MEMBRANE
P12694	BCKDHA	0	0	0	0	0	0	1	0	0	0	0	MITOCHONDRIA
P12814	ACTN1	0	0	1	0	0	0	0	0	0	0	0	CYTOSOL
P12931-2	SRC	0	0	0	0	0	0	0	0	0	0	1	PLASMA MEMBRANE
P12956	XRCC6	0	0	0.160289	0	0	0	0	0	0.839711	0	0	NUCLEUS
P13010	XRCC5	0	0	0.118802	0	0	0	0	0	0.881198	0	0	NUCLEUS
P13073	COX4I1	0	0	0	0	0	0	1	0	0	0	0	MITOCHONDRIA
P13196	ALAS1	0.236753	0	0	0	0	0	0.763247	0	0	0	0	MITOCHONDRIA
P13284	IFI30	0	0	0	0	0.183942	0.680897	0	0	0	0	0.135161	LYSOSOME
P13473-2		0	0	0	0	0.202429	0.696938	0	0	0	0	0.100632	LYSOSOME
P13489	RNH1	0	0	1	0	0	0	0	0	0	0	0	CYTOSOL
P13498	CYBA	0	0	0	0.28516	0.345944	0	0	0	0	0	0.368896	PLASMA MEMBRANE
P13501	CCL5	0	0	0	0	0.247865	0.334158	0	0	0	0	0.417977	PLASMA MEMBRANE
P13612	ITGA4	0	0	0	0	0	0	0	0	0	0	1	PLASMA MEMBRANE
P13639	EEF2	0.175344	0	0.399469	0	0	0	0	0	0.425186	0	0	NUCLEUS
P13667	PDIA4	0.225839	0	0	0.464809	0	0.309352	0	0	0	0	0	ENDOPLASMIC RETICULUM
P13674	P4HA1	0	0	0	0.29614	0	0.364901	0	0	0	0	0.33896	LYSOSOME
P13674-2	P4HA1	0	0	0	0.252425	0	0.292657	0	0	0	0	0.454918	PLASMA MEMBRANE
P13693	TPT1	0	0	0.472504	0	0	0	0	0	0.527496	0	0	NUCLEUS
P13747	HLA-E	0	0	0	0.234682	0.250808	0.204066	0	0	0	0	0.310444	PLASMA MEMBRANE
P13796	LCP1	0	0	1	0	0	0	0	0	0	0	0	CYTOSOL
P13798	APEH	0	0	0.870213	0	0	0	0	0	0	0	0.129787	CYTOSOL
P13804	ETFA	0	0	0	0	0	0	1	0	0	0	0	MITOCHONDRIA
P13807	GYS1	0	0	0	0	0.542308	0	0	0	0	0	0.457691	GOLGI APPARATUS
P13861	PRKAR2A	0	0	0.507068	0	0	0.216471	0	0	0	0	0.276461	CYTOSOL
P13984		0	0	0.23404	0	0	0	0	0	0.76596	0	0	NUCLEUS
P13987	CD59	0	0	0	0	0	0	0	0	0	0	1	PLASMA MEMBRANE
P13995	MTHFD2	0	0	0	0	0	0	1	0	0	0	0	MITOCHONDRIA
P14174	MIF	0	0	0.531563	0	0	0	0	0	0	0	0.468437	CYTOSOL
P14209	CD99	0	0	0	0	0	0	0	0	0	0	1	PLASMA MEMBRANE
P14314	PRKCSH	0.196086	0	0	0.542514	0	0.2614	0	0	0	0	0	ENDOPLASMIC RETICULUM
P14317	HCLS1	0	0	0.815446	0	0	0	0	0	0	0	0.184554	CYTOSOL
P14324	FDPS	0	0	1	0	0	0	0	0	0	0	0	CYTOSOL
P14384	CPM	0	0	0	0	0	0	0	0	0	0	1	PLASMA MEMBRANE
P14543	NID1	0	0	0	0	0.355957	0.327134	0	0	0	0	0.316908	GOLGI APPARATUS
P14550	AKR1A1	0	0	1	0	0	0	0	0	0	0	0	CYTOSOL
P14618	PKM	0	0	0.547162	0	0	0	0	0	0.452838	0	0	CYTOSOL
P14625	HSP90B1	0.184122	0	0	0.58203	0	0.233848	0	0	0	0	0	ENDOPLASMIC RETICULUM
P14635		0.225749	0.358073	0	0	0.2725	0	0	0	0	0	0.143678	CHROMATIN
P14678-3	SNRPB	0	0	0.248018	0	0	0	0	0	0.751982	0	0	NUCLEUS
P14735	IDE	0	0	1	0	0	0	0	0	0	0	0	CYTOSOL
P14854	COX6B1	0	0	0	0.333798	0	0	0.666202	0	0	0	0	MITOCHONDRIA
P14866	HNRNPL	0	0.268132	0	0	0	0	0	0	0.731868	0	0	NUCLEUS
P14868	DARS	0	0	0.563583	0	0	0	0	0	0.436417	0	0	CYTOSOL
P14923	JUP	0	0	0.155264	0	0	0	0	0	0	0	0.844736	PLASMA MEMBRANE
P14927	UQCRB	0	0	0	0	0	0	1	0	0	0	0	MITOCHONDRIA
P15104		0	0	1	0	0	0	0	0	0	0	0	CYTOSOL
P15121	AKR1B1	0	0	1	0	0	0	0	0	0	0	0	CYTOSOL
P15144	ANPEP	0	0	0	0	0	0	0	0	0	0	1	PLASMA MEMBRANE
P15151	PVR	0	0	0	0	0	0	0	0	0	0	1	PLASMA MEMBRANE
P15153	RAC2	0	0	0.586217	0	0	0	0	0	0	0	0.413783	CYTOSOL
P15170-3	GSPT1	0	0	1	0	0	0	0	0	0	0	0	CYTOSOL
P15260		0	0	0	0	0	0	0	0	0	0	1	PLASMA MEMBRANE
P15289	ARSA	0	0	0	0	0	0.870983	0	0	0	0	0.129018	LYSOSOME
P15309-2		0	0	0	0	0	0.815424	0	0	0	0	0.184576	LYSOSOME
P15311	EZR	0	0	0	0	0	0	0	0	0	0	1	PLASMA MEMBRANE
P15374		0	0	1	0	0	0	0	0	0	0	0	CYTOSOL
P15498	VAV1	0	0	0.617414	0	0	0	0	0	0.382586	0	0	CYTOSOL
P15509-7	CSF2RA	0	0	0	0	0	0.278721	0	0	0	0	0.721279	PLASMA MEMBRANE
P15529-3	CD46	0	0	0	0	0	0	0	0	0	0	1	PLASMA MEMBRANE
P15559	NQO1	0	0	0.706887	0	0	0	0	0	0.293113	0	0	CYTOSOL
P15586	GNS	0	0	0	0	0	0.831911	0	0	0	0	0.168089	LYSOSOME
P15848	ARSB	0	0	0	0	0	1	0	0	0	0	0	LYSOSOME
P15880	RPS2	1	0	0	0	0	0	0	0	0	0	0	40S/60S RIBOSOME
P15927-3		0	0	0.30465	0	0	0	0	0	0.69535	0	0	NUCLEUS
P15954	COX7C	0	0	0	0	0	0	1	0	0	0	0	MITOCHONDRIA
P16070	CD44	0	0	0	0	0	0	0	0	0	0	1	PLASMA MEMBRANE
P16104	H2AFX	0	1	0	0	0	0	0	0	0	0	0	CHROMATIN
P16150	SPN	0	0	0	0	0	0	0	0	0	0	1	PLASMA MEMBRANE
P16152	CBR1	0	0	1	0	0	0	0	0	0	0	0	CYTOSOL
P16219	ACADS	0	0	0	0	0	0	1	0	0	0	0	MITOCHONDRIA
P16278	GLB1	0	0	0	0	0	1	0	0	0	0	0	LYSOSOME
P16284	PECAM1	0	0	0	0	0	0	0	0	0	0	1	PLASMA MEMBRANE
P16333	NCK1	0	0	0.672098	0	0	0	0	0	0.327902	0	0	CYTOSOL
P16401	HIST1H1B	0	0.877303	0	0	0	0	0.122697	0	0	0	0	CHROMATIN
P16402	HIST1H1D	0	0.865957	0	0	0	0	0.134043	0	0	0	0	CHROMATIN
P16403	HIST1H1C	0	0.860419	0	0	0	0	0.139581	0	0	0	0	CHROMATIN
P16435	POR	0	0	0	1	0	0	0	0	0	0	0	ENDOPLASMIC RETICULUM
P16455	MGMT	0	0.530581	0	0	0	0	0	0	0.469419	0	0	CHROMATIN
P16615	ATP2A2	0	0	0	1	0	0	0	0	0	0	0	ENDOPLASMIC RETICULUM
P16885	PLCG2	0	0	1	0	0	0	0	0	0	0	0	CYTOSOL
P16930	FAH	0	0	1	0	0	0	0	0	0	0	0	CYTOSOL
P16949	STMN1	0	0	1	0	0	0	0	0	0	0	0	CYTOSOL
P16989		0	0	0	0	0	0	0	0	0	0	1	PLASMA MEMBRANE
P17050	NAGA	0	0	0	0	0.299981	0.700019	0	0	0	0	0	LYSOSOME
P17152	TMEM11	0	0	0	0	0	0	1	0	0	0	0	MITOCHONDRIA
P17252	PRKCA	0	0	1	0	0	0	0	0	0	0	0	CYTOSOL
P17480	UBTF	0	1	0	0	0	0	0	0	0	0	0	CHROMATIN
P17568	NDUFB7	0.201921	0	0	0	0	0	0.798079	0	0	0	0	MITOCHONDRIA
P17612		0	0	1	0	0	0	0	0	0	0	0	CYTOSOL
P17655	CAPN2	0	0	1	0	0	0	0	0	0	0	0	CYTOSOL
P17706	PTPN2	0.223058	0	0	0.419214	0.357728	0	0	0	0	0	0	ENDOPLASMIC RETICULUM
P17812	CTPS1	0	0	1	0	0	0	0	0	0	0	0	CYTOSOL
P17813	ENG	0	0	0	0	0	0	0	0	0	0	1	PLASMA MEMBRANE
P17844	DDX5	0.257934	0	0	0	0	0	0	0.335744	0.406322	0	0	NUCLEUS
P17858	PFKL	0	0	0.453626	0	0	0	0	0	0.546374	0	0	NUCLEUS
P17931	LGALS3	0	0	0	0	0	0.441951	0	0	0	0	0.558049	PLASMA MEMBRANE
P17980	PSMC3	0	0	1	0	0	0	0	0	0	0	0	CYTOSOL
P17987	TCP1	0	0	0.749581	0	0	0	0	0	0.250419	0	0	CYTOSOL
P18031	PTPN1	0	0	0	1	0	0	0	0	0	0	0	ENDOPLASMIC RETICULUM
P18074		0.247901	0	0.752099	0	0	0	0	0	0	0	0	CYTOSOL
P18077	RPL35A	1	0	0	0	0	0	0	0	0	0	0	40S/60S RIBOSOME
P18084	ITGB5	0	0	0	0	0	0	0	0	0	0	1	PLASMA MEMBRANE
P18124	RPL7	0.708571	0	0	0	0	0	0	0	0	0.291429	0	40S/60S RIBOSOME
P18206	VCL	0	0	1	0	0	0	0	0	0	0	0	CYTOSOL
P18433	PTPRA	0	0	0	0	0	0	0	0	0	0	1	PLASMA MEMBRANE
P18583-5		0	0	0	0	0	0	0	1	0	0	0	NUCLEOLUS
P18615-3	NELFE	0	0	0.17353	0	0	0	0	0	0.82647	0	0	NUCLEUS
P18621-3	RPL17	0.565302	0	0	0.22733	0	0	0	0	0	0.207368	0	40S/60S RIBOSOME
P18669	PGAM1	0	0	1	0	0	0	0	0	0	0	0	CYTOSOL
P18754-2	RCC1	0	1	0	0	0	0	0	0	0	0	0	CHROMATIN
P18850	ATF6	0.24418	0	0	0.523225	0	0.232594	0	0	0	0	0	ENDOPLASMIC RETICULUM
P18858		0	0	0.721085	0	0	0	0	0	0.278915	0	0	CYTOSOL
P18859-2	ATP5J	0	0	0	0	0	0	1	0	0	0	0	MITOCHONDRIA
P19022		0	0	0	0	0	0	0	0	0	0	1	PLASMA MEMBRANE
P19338	NCL	0	0	0.387205	0	0	0	0	0	0.612795	0	0	NUCLEUS
P19367-3		0	0	0	0	0	0	0.605091	0	0.394909	0	0	MITOCHONDRIA
P19387		0	0	0.381654	0	0	0	0	0	0.618346	0	0	NUCLEUS
P19388	POLR2E	0	0	0	0	0	0	0	0	1	0	0	NUCLEUS
P19404	NDUFV2	0	0	0	0	0	0	1	0	0	0	0	MITOCHONDRIA
P19440	GGT1	0	0	0	0	0	0	0	0	0	0	1	PLASMA MEMBRANE
P19447		0	1	0	0	0	0	0	0	0	0	0	CHROMATIN
P19474	TRIM21	0	0	1	0	0	0	0	0	0	0	0	CYTOSOL
P19525	EIF2AK2	0.571828	0	0	0	0	0	0	0	0.428172	0	0	40S/60S RIBOSOME
P19532	TFE3	0	0.374404	0	0	0.340315	0	0	0	0	0	0.285281	CHROMATIN
P19623	SRM	0	0	1	0	0	0	0	0	0	0	0	CYTOSOL
P19634	SLC9A1	0	0	0	0	0.188748	0.280385	0	0	0	0	0.530867	PLASMA MEMBRANE
P19801-2	AOC1	0	0	0	0.207902	0.296305	0.385368	0	0	0	0	0.110425	LYSOSOME
P19838-2	NFKB1	0	0	0.612527	0	0	0	0	0	0.387473	0	0	CYTOSOL
P19878	NCF2	0	0	1	0	0	0	0	0	0	0	0	CYTOSOL
P19971	TYMP	0	0	0.871853	0	0	0	0	0	0	0	0.128147	CYTOSOL
P20020	ATP2B1	0	0	0	0	0	0	0	0	0	0	1	PLASMA MEMBRANE
P20042	EIF2S2	0	0	0.147031	0	0	0	0	0	0.852969	0	0	NUCLEUS
P20073	ANXA7	0	0	1	0	0	0	0	0	0	0	0	CYTOSOL
P20138	CD33	0	0	0	0	0	0	0	0	0	0	1	PLASMA MEMBRANE
P20160	AZU1	0	0	0	0	0.22237	0.232921	0	0	0	0	0.544708	PLASMA MEMBRANE
P20290	BTF3	0	0	0	0	0	0	0	0.392833	0	0	0.607167	PLASMA MEMBRANE
P20333	TNFRSF1B	0	0	0	0	0	0	0	0	0	0	1	PLASMA MEMBRANE
P20338	RAB4A	0	0	0.563044	0	0	0.436956	0	0	0	0	0	CYTOSOL
P20339	RAB5A	0	0	0	0	0.33424	0.35438	0	0	0	0	0.311379	LYSOSOME
P20585	MSH3	0	1	0	0	0	0	0	0	0	0	0	CHROMATIN
P20591	MX1	0	0	0.738628	0	0	0	0	0	0.261372	0	0	CYTOSOL
P20592	MX2	0	1	0	0	0	0	0	0	0	0	0	CHROMATIN
P20618	PSMB1	0	0	1	0	0	0	0	0	0	0	0	CYTOSOL
P20645	M6PR	0	0	0	0	0.267746	0.732254	0	0	0	0	0	LYSOSOME
P20674	COX5A	0	0	0	0	0	0	0.760758	0	0	0.239242	0	MITOCHONDRIA
P20700	LMNB1	0	0.727605	0	0	0	0	0.272395	0	0	0	0	CHROMATIN
P20701-2	ITGAL	0	0	0	0	0	0	0	0	0	0	1	PLASMA MEMBRANE
P20702	ITGAX	0	0	0	0	0	0	0	0	0	0	1	PLASMA MEMBRANE
P20839-6	IMPDH1	0	0	0.523696	0	0	0	0	0	0.476304	0	0	CYTOSOL
P20933	AGA	0	0	0	0.229808	0.232513	0.537679	0	0	0	0	0	LYSOSOME
P21281	ATP6V1B2	0	0	0.335794	0	0	0.340263	0	0	0	0	0.323943	LYSOSOME
P21283	ATP6V1C1	0	0	0.765477	0	0	0.234523	0	0	0	0	0	CYTOSOL
P21291	CSRP1	0	0	0	0	0.276076	0	0	0	0	0	0.723924	PLASMA MEMBRANE
P21359	NF1	0	0	0	0	0	0	0	0	0	0	1	PLASMA MEMBRANE
P21796	VDAC1	0	0	0	0	0	0	1	0	0	0	0	MITOCHONDRIA
P21912	SDHB	0	0	0	0	0	0	1	0	0	0	0	MITOCHONDRIA
P21953	BCKDHB	0	0	0	0	0	0	1	0	0	0	0	MITOCHONDRIA
P21964	COMT	0	0	0	1	0	0	0	0	0	0	0	ENDOPLASMIC RETICULUM
P22033	MUT	0	0	0	0	0	0	1	0	0	0	0	MITOCHONDRIA
P22059	OSBP	0	0	1	0	0	0	0	0	0	0	0	CYTOSOL
P22061-2	PCMT1	0.235589	0	0.764411	0	0	0	0	0	0	0	0	CYTOSOL
P22083	FUT4	0	0	0	0.251206	0.472437	0.276356	0	0	0	0	0	GOLGI APPARATUS
P22087	FBL	0	0	0	0	0	0	0	0.730013	0.269987	0	0	NUCLEOLUS
P22090	RPS4Y1	0.392179	0	0.200223	0	0	0	0	0	0.407598	0	0	NUCLEUS
P22102	GART	0	0	0.699987	0	0	0	0	0	0.300013	0	0	CYTOSOL
P22234-2	PAICS	0	0	1	0	0	0	0	0	0	0	0	CYTOSOL
P22307	SCP2	0.193633	0	0	0	0	0	0	0	0	0.806367	0	PEROXISOME
P22392-2	NME2P1	0	0	1	0	0	0	0	0	0	0	0	CYTOSOL
P22570-3		0	0	0	0	0	0	1	0	0	0	0	MITOCHONDRIA
P22626	HNRNPA2B1	0	0.198898	0	0	0	0	0	0.29929	0.501812	0	0	NUCLEUS
P22681	CBL	0	0	1	0	0	0	0	0	0	0	0	CYTOSOL
P22692	IGFBP4	0.280612	0	0	0	0.308056	0.278128	0	0	0	0	0.133205	GOLGI APPARATUS
P22695	UQCRC2	0	0	0	0	0	0	1	0	0	0	0	MITOCHONDRIA
P22732	SLC2A5	0	0	0	0	0	0	0	0	0	0	1	PLASMA MEMBRANE
P22794-2	EVI2A	0	0	0	0	0	0	0	0	0	0	1	PLASMA MEMBRANE
P22830-2	FECH	0	0	0	0	0	0	1	0	0	0	0	MITOCHONDRIA
P23141-2	CES1P1	0.258064	0	0	0.475578	0	0.266358	0	0	0	0	0	ENDOPLASMIC RETICULUM
P23193	TCEA1	0	0	0	0	0	0	0	0	1	0	0	NUCLEUS
P23219-5	PTGS1	0	0	0	0.723685	0.276315	0	0	0	0	0	0	ENDOPLASMIC RETICULUM
P23246	SFPQ	0	0.426767	0	0	0	0	0	0.573233	0	0	0	NUCLEOLUS
P23258	TUBG1	0	0	0	0	0	0	0	0.503654	0.496346	0	0	NUCLEOLUS
P23284	PPIB	0.489868	0	0	0.510132	0	0	0	0	0	0	0	ENDOPLASMIC RETICULUM
P23368	ME2	0	0	0	0	0	0	1	0	0	0	0	MITOCHONDRIA
P23381	WARS	0	0	1	0	0	0	0	0	0	0	0	CYTOSOL
P23396	RPS3	0.695581	0	0	0	0	0	0	0	0.304419	0	0	40S/60S RIBOSOME
P23434	GCSH	0	0	0	0	0	0	1	0	0	0	0	MITOCHONDRIA
P23443		0	0	1	0	0	0	0	0	0	0	0	CYTOSOL
P23458	JAK1	0	0	0	0	0	0	0	0	0	0	1	PLASMA MEMBRANE
P23469	PTPRE	0	0	0.575674	0	0	0.218968	0	0	0	0	0.205357	CYTOSOL
P23526	AHCY	0	0	1	0	0	0	0	0	0	0	0	CYTOSOL
P23528	CFL1	0	0	1	0	0	0	0	0	0	0	0	CYTOSOL
P23588	EIF4B	0	0	0.594038	0	0	0	0	0	0.405962	0	0	CYTOSOL
P23634	ATP2B4	0	0	0	0	0	0	0	0	0	0	1	PLASMA MEMBRANE
P23786	CPT2	0	0	0	0	0	0	1	0	0	0	0	MITOCHONDRIA
P23919	DTYMK	0	0	0.276871	0	0	0	0.192865	0	0.530264	0	0	NUCLEUS
P23921	RRM1	0	0	0.531762	0	0	0	0	0	0.468238	0	0	CYTOSOL
P24158		0	0	0	0.51624	0	0.48376	0	0	0	0	0	ENDOPLASMIC RETICULUM
P24534	EEF1B2	0	0	0.473306	0	0	0	0	0	0.526694	0	0	NUCLEUS
P24539	ATP5F1	0	0	0	0	0	0	1	0	0	0	0	MITOCHONDRIA
P24557-3	TBXAS1	0	0	0	0.567496	0.199435	0.233069	0	0	0	0	0	ENDOPLASMIC RETICULUM
P24666	ACP1	0	0	1	0	0	0	0	0	0	0	0	CYTOSOL
P24752	ACAT1	0	0	0	0	0	0	1	0	0	0	0	MITOCHONDRIA
P24844	MYL9	0	0	0.406242	0	0	0	0	0	0.593758	0	0	NUCLEUS
P24928	POLR2A	0	0	0.164435	0	0	0	0	0	0.835565	0	0	NUCLEUS
P24941	CDK2	0	0.488004	0	0	0	0	0	0	0.511996	0	0	NUCLEUS
P25054		0.457997	0	0	0	0.542003	0	0	0	0	0	0	GOLGI APPARATUS
P25098	GRK2	0	0	1	0	0	0	0	0	0	0	0	CYTOSOL
P25205-2	MCM3	0	0	0.267617	0	0	0	0	0	0.732383	0	0	NUCLEUS
P25325-2	MPST	0	0	0.407472	0	0	0	0.280255	0	0.312273	0	0	CYTOSOL
P25398	RPS12	0.563154	0	0	0	0	0	0	0	0.436846	0	0	40S/60S RIBOSOME
P25490	YY1	0	1	0	0	0	0	0	0	0	0	0	CHROMATIN
P25685	DNAJB1	0.184723	0.294956	0	0	0	0	0	0	0.520321	0	0	NUCLEUS
P25686	DNAJB2	0.274705	0	0.260792	0	0.464502	0	0	0	0	0	0	GOLGI APPARATUS
P25705	ATP5A1	0	0	0	0	0	0	1	0	0	0	0	MITOCHONDRIA
P25774	CTSS	0	0	0	0	0	0.813391	0	0	0	0	0.186609	LYSOSOME
P25786-2	PSMA1	0	0	1	0	0	0	0	0	0	0	0	CYTOSOL
P25787	PSMA2	0	0	1	0	0	0	0	0	0	0	0	CYTOSOL
P25788	PSMA3	0	0	1	0	0	0	0	0	0	0	0	CYTOSOL
P25789	PSMA4	0	0	1	0	0	0	0	0	0	0	0	CYTOSOL
P25942	CD40	0	0	0	0	0	0	0	0	0	0	1	PLASMA MEMBRANE
P26010	ITGB7	0	0	0	0	0.407464	0	0	0	0	0	0.592536	PLASMA MEMBRANE
P26038	MSN	0	0	0.178392	0	0	0	0	0	0	0	0.821608	PLASMA MEMBRANE
P26196	DDX6	0	0	0.196688	0	0	0	0	0	0.803312	0	0	NUCLEUS
P26368	U2AF2	0	0	0	0	0	0	0	0	1	0	0	NUCLEUS
P26373	RPL13	1	0	0	0	0	0	0	0	0	0	0	40S/60S RIBOSOME
P26440	IVD	0	0	0	0	0	0	1	0	0	0	0	MITOCHONDRIA
P26447	S100A4	0	0	1	0	0	0	0	0	0	0	0	CYTOSOL
P26572	MGAT1	0	0	0	0	0.574182	0.199645	0	0	0	0.226173	0	GOLGI APPARATUS
P26583	HMGB2	0	1	0	0	0	0	0	0	0	0	0	CHROMATIN
P26599-3	PTBP1	0	0	0.253572	0	0	0	0	0	0.746428	0	0	NUCLEUS
P26639	TARS	0	0	0.584424	0	0	0	0	0	0.415576	0	0	CYTOSOL
P26640	VARS	0	0	0.708075	0	0	0	0	0	0.291925	0	0	CYTOSOL
P26641		0	0	0.454924	0	0	0	0	0	0.545076	0	0	NUCLEUS
P26885	FKBP2	0.314783	0	0	0.44717	0	0.238048	0	0	0	0	0	ENDOPLASMIC RETICULUM
P27105	STOM	0	0	0	0	0	0	0	0	0	0	1	PLASMA MEMBRANE
P27144	AK4	0	0	0	0	0	0	1	0	0	0	0	MITOCHONDRIA
P27348	YWHAQ	0	0	1	0	0	0	0	0	0	0	0	CYTOSOL
P27361	MAPK3	0	0	0.862052	0	0	0	0	0	0	0	0.137948	CYTOSOL
P27448	MARK3	0	0	0	0	0.45865	0	0	0	0	0	0.54135	PLASMA MEMBRANE
P27449	ATP6V0C	0	0	0	0	0.380222	0.619778	0	0	0	0	0	LYSOSOME
P27540	ARNT	0	0.239388	0.170849	0	0	0	0	0	0.589764	0	0	NUCLEUS
P27635	RPL10	0.549966	0	0	0.217798	0	0	0	0	0	0.232236	0	40S/60S RIBOSOME
P27694	RPA1	0	0	0.312143	0	0	0	0	0	0.687857	0	0	NUCLEUS
P27695	APEX1	0	0	0	0	0	0	0	0	1	0	0	NUCLEUS
P27701	CD82	0	0	0	0	0.269265	0	0	0	0	0	0.730735	PLASMA MEMBRANE
P27707	DCK	0	0	1	0	0	0	0	0	0	0	0	CYTOSOL
P27708	CAD	0	0	0.72211	0	0	0	0	0	0.27789	0	0	CYTOSOL
P27797	CALR	0.303616	0	0.147221	0.422139	0	0	0.127024	0	0	0	0	ENDOPLASMIC RETICULUM
P27816	MAP4	0.481086	0	0	0	0.518914	0	0	0	0	0	0	GOLGI APPARATUS
P27824-2	CANX	0	0	0	1	0	0	0	0	0	0	0	ENDOPLASMIC RETICULUM
P27918	CFP	0.173564	0	0	0	0.194038	0.254876	0	0	0	0	0.377521	PLASMA MEMBRANE
P27986	PIK3R1	0	0	0	0	0	0	0	0	1	0	0	NUCLEUS
P28062	PSMB8	0	0	1	0	0	0	0	0	0	0	0	CYTOSOL
P28065	PSMB9	0	0	1	0	0	0	0	0	0	0	0	CYTOSOL
P28066	PSMA5	0	0	1	0	0	0	0	0	0	0	0	CYTOSOL
P28070	PSMB4	0	0	1	0	0	0	0	0	0	0	0	CYTOSOL
P28288	ABCD3	0	0	0	0.252458	0	0	0.133868	0	0	0.613673	0	PEROXISOME
P28290	SSFA2	0.254084	0	0	0.745916	0	0	0	0	0	0	0	ENDOPLASMIC RETICULUM
P28331-2	NDUFS1	0	0	0	0	0	0	1	0	0	0	0	MITOCHONDRIA
P28340	POLD1	0	0	0.395572	0	0	0	0	0	0.604428	0	0	NUCLEUS
P28482	MAPK1	0	0	0.680632	0	0	0	0	0	0.319368	0	0	CYTOSOL
P28799	GRN	0	0	0	0	0.298054	0.701946	0	0	0	0	0	LYSOSOME
P28907	CD38	0	0	0	0	0	0.213207	0	0	0	0	0.786793	PLASMA MEMBRANE
P29144	TPP2	0	0	0	0	0	0	0	0.739726	0.260274	0	0	NUCLEOLUS
P29218-3	IMPA1	0	0	1	0	0	0	0	0	0	0	0	CYTOSOL
P29350-3		0	0	0.353302	0	0	0	0	0	0.646698	0	0	NUCLEUS
P29353-6	SHC1	0	0	0.463793	0	0.536207	0	0	0	0	0	0	GOLGI APPARATUS
P29372	MPG	0	1	0	0	0	0	0	0	0	0	0	CHROMATIN
P29401-2		0	0	0.587827	0	0	0	0	0	0.412173	0	0	CYTOSOL
P29466	CASP1	0	0	1	0	0	0	0	0	0	0	0	CYTOSOL
P29590		0	0	0.487538	0	0	0	0	0	0.512462	0	0	NUCLEUS
P29597	TYK2	0	0	0	0	0	0	0	0	0	0	1	PLASMA MEMBRANE
P29692-2		0	0	0.224102	0	0	0	0	0	0.426557	0	0.349341	NUCLEUS
P29762	CRABP1	0	0	1	0	0	0	0	0	0	0	0	CYTOSOL
P30038	ALDH4A1	0	0	0	0	0	0	1	0	0	0	0	MITOCHONDRIA
P30040	ERP29	0.17637	0	0	0.534213	0	0.289417	0	0	0	0	0	ENDOPLASMIC RETICULUM
P30041	PRDX6	0	0	1	0	0	0	0	0	0	0	0	CYTOSOL
P30042	C21orf33	0	0	0	0	0	0	1	0	0	0	0	MITOCHONDRIA
P30043	BLVRB	0	0	1	0	0	0	0	0	0	0	0	CYTOSOL
P30044		0.199559	0	0.202845	0	0	0	0.288755	0	0.308841	0	0	NUCLEUS
P30048	PRDX3	0	0	0	0	0	0	1	0	0	0	0	MITOCHONDRIA
P30049	ATP5D	0	0	0	0	0	0	1	0	0	0	0	MITOCHONDRIA
P30050	RPL12	1	0	0	0	0	0	0	0	0	0	0	40S/60S RIBOSOME
P30084	ECHS1	0	0	0	0	0	0	1	0	0	0	0	MITOCHONDRIA
P30085	CMPK1	0	0	0.738771	0	0	0	0	0	0.261229	0	0	CYTOSOL
P30086	PEBP1	0	0	1	0	0	0	0	0	0	0	0	CYTOSOL
P30101	PDIA3	0.179634	0	0	0.492136	0	0.32823	0	0	0	0	0	ENDOPLASMIC RETICULUM
P30153	PPP2R1A	0	0	1	0	0	0	0	0	0	0	0	CYTOSOL
P30273	FCER1G	0	0	0	0	0.275671	0.235771	0	0	0	0	0.488557	PLASMA MEMBRANE
P30405	PPIF	0	0	0	0	0	0	1	0	0	0	0	MITOCHONDRIA
P30419	NMT1	0	0	0	0	0	0	0	0	1	0	0	NUCLEUS
P30511-3	HLA-F	0	0	0	0	0.255517	0.302618	0	0	0	0	0.441865	PLASMA MEMBRANE
P30519	HMOX2	0	0	0	1	0	0	0	0	0	0	0	ENDOPLASMIC RETICULUM
P30520	ADSS	0	0	1	0	0	0	0	0	0	0	0	CYTOSOL
P30530	AXL	0	0	0	0	0	0	0	0	0	0	1	PLASMA MEMBRANE
P30533	LRPAP1	0.63767	0	0	0.36233	0	0	0	0	0	0	0	40S/60S RIBOSOME
P30536		0	0	0	0	0	0	1	0	0	0	0	MITOCHONDRIA
P30566	ADSL	0	0	1	0	0	0	0	0	0	0	0	CYTOSOL
P30622		0.309767	0	0.690233	0	0	0	0	0	0	0	0	CYTOSOL
P30626	SRI	0	0	1	0	0	0	0	0	0	0	0	CYTOSOL
P30740	SERPINB1	0	0	1	0	0	0	0	0	0	0	0	CYTOSOL
P30837	ALDH1B1	0	0	0	0	0	0	1	0	0	0	0	MITOCHONDRIA
P30876	POLR2B	0	0	0.359614	0	0	0	0	0	0.640386	0	0	NUCLEUS
P31040	SDHA	0	0	0	0	0	0	1	0	0	0	0	MITOCHONDRIA
P31146	CORO1A	0	0	0.737086	0	0	0	0	0	0	0	0.262914	CYTOSOL
P31153	MAT2A	0	0	1	0	0	0	0	0	0	0	0	CYTOSOL
P31323	PRKAR2B	0	0	0.517518	0	0	0	0	0	0	0	0.482482	CYTOSOL
P31483		0	0	1	0	0	0	0	0	0	0	0	CYTOSOL
P31689	DNAJA1	0	0	0.506347	0	0	0	0	0	0.493653	0	0	CYTOSOL
P31749		0	0	1	0	0	0	0	0	0	0	0	CYTOSOL
P31930	UQCRC1	0	0	0	0	0	0	1	0	0	0	0	MITOCHONDRIA
P31937	HIBADH	0	0	0	0	0	0	1	0	0	0	0	MITOCHONDRIA
P31939	ATIC	0	0	1	0	0	0	0	0	0	0	0	CYTOSOL
P31943	HNRNPH1	0	0	0.288136	0	0	0	0	0	0.711864	0	0	NUCLEUS
P31946	YWHAB	0	0	1	0	0	0	0	0	0	0	0	CYTOSOL
P31948-2	STIP1	0	0	1	0	0	0	0	0	0	0	0	CYTOSOL
P31949	S100A11	0	0	1	0	0	0	0	0	0	0	0	CYTOSOL
P32119	PRDX2	0	0	1	0	0	0	0	0	0	0	0	CYTOSOL
P32189	GK3P	0.390299	0	0	0	0	0	0.609701	0	0	0	0	MITOCHONDRIA
P32246	CCR1	0	0	0	0	0.229596	0	0	0	0	0	0.770404	PLASMA MEMBRANE
P32249		0	0	0	0	0	0	0	0	0	0	1	PLASMA MEMBRANE
P32322-3	PYCR1	0	0	0	0	0	0	0.738067	0	0	0.261933	0	MITOCHONDRIA
P32519	ELF1	0	1	0	0	0	0	0	0	0	0	0	CHROMATIN
P32856		0	0	0	0	0	0	0	0	0	0	1	PLASMA MEMBRANE
P32942	ICAM3	0	0	0	0	0	0	0	0	0	0	1	PLASMA MEMBRANE
P32969	RPL9	0.674974	0	0	0	0	0	0	0	0	0.325026	0	40S/60S RIBOSOME
P32970	CD70	0	0	0	0	0	0	0	0	0	0	1	PLASMA MEMBRANE
P33121	ACSL1	0.212996	0	0	0.399086	0	0	0	0	0	0.387918	0	ENDOPLASMIC RETICULUM
P33176	KIF5B	0	0	0.491057	0	0	0	0	0	0.508943	0	0	NUCLEUS
P33241-3	LSP1	0	0	0.271859	0	0	0	0	0	0	0	0.728141	PLASMA MEMBRANE
P33527	ABCC1	0	0	0	0	0	0	0	0	0	0	1	PLASMA MEMBRANE
P33897	ABCD1	0	0	0	0.24859	0	0	0	0	0	0.75141	0	PEROXISOME
P33908	MAN1A1	0	0	0	0	1	0	0	0	0	0	0	GOLGI APPARATUS
P33981		0	0.524945	0	0	0	0	0	0	0.475055	0	0	CHROMATIN
P33991	MCM4	0	0	0.305683	0	0	0	0	0	0.694317	0	0	NUCLEUS
P33992	MCM5	0	0	0.166282	0	0	0	0	0	0.833718	0	0	NUCLEUS
P33993	MCM7	0	0	0.388614	0	0	0	0	0	0.611386	0	0	NUCLEUS
P34059	GALNS	0	0	0	0	0	1	0	0	0	0	0	LYSOSOME
P34820	BMP8B	0.355692	0	0	0.644308	0	0	0	0	0	0	0	ENDOPLASMIC RETICULUM
P34897	SHMT2	0	0	0	0	0	0	1	0	0	0	0	MITOCHONDRIA
P34910-2	EVI2B	0	0	0	0	0	0.212814	0	0	0	0	0.787186	PLASMA MEMBRANE
P34913	EPHX2	0	0	0.671432	0	0	0	0	0	0.328568	0	0	CYTOSOL
P34932	HSPA4	0	0	1	0	0	0	0	0	0	0	0	CYTOSOL
P34949		0	0	1	0	0	0	0	0	0	0	0	CYTOSOL
P35221-2	CTNNA1	0	0	0	0	0	0	0	0	0	0	1	PLASMA MEMBRANE
P35222	CTNNB1	0	0	0	0	0	0	0	0	0	0	1	PLASMA MEMBRANE
P35226	BMI1	0	1	0	0	0	0	0	0	0	0	0	CHROMATIN
P35232	PHB	0	0	0	0	0	0	1	0	0	0	0	MITOCHONDRIA
P35236-3	PTPN7	0	0	1	0	0	0	0	0	0	0	0	CYTOSOL
P35240	NF2	0	0	0.15684	0	0	0	0	0	0	0	0.84316	PLASMA MEMBRANE
P35241	RDX	0	0	0.334741	0	0	0.192432	0	0	0	0	0.472827	PLASMA MEMBRANE
P35244		0	0	0.293684	0	0	0	0	0	0.706316	0	0	NUCLEUS
P35249	RFC4	0	0.409158	0	0	0	0	0	0	0.590842	0	0	NUCLEUS
P35250	RFC2	0	0.577521	0	0	0	0	0	0	0.422479	0	0	CHROMATIN
P35251	RFC1	0	1	0	0	0	0	0	0	0	0	0	CHROMATIN
P35268	RPL22	0.715127	0	0	0.284873	0	0	0	0	0	0	0	40S/60S RIBOSOME
P35269	GTF2F1	0	0.339607	0.105782	0	0	0	0	0	0.554611	0	0	NUCLEUS
P35270	SPR	0	0	0.514119	0	0	0	0.15096	0	0.334921	0	0	CYTOSOL
P35408	PTGER4	0	0	0	0	0	0	0	0	0	0	1	PLASMA MEMBRANE
P35475	IDUA	0	0	0	0	0	1	0	0	0	0	0	LYSOSOME
P35520-2	CBSL	0	0	1	0	0	0	0	0	0	0	0	CYTOSOL
P35556	FBN2	0.180251	0	0	0.428786	0	0.390963	0	0	0	0	0	ENDOPLASMIC RETICULUM
P35579	MYH9	0	0	0.581903	0	0	0	0	0	0.418097	0	0	CYTOSOL
P35606	COPB2	0	0	0.72658	0	0	0	0	0	0.273419	0	0	CYTOSOL
P35611-3	ADD1	0	0	0.337699	0	0.354714	0	0	0	0	0	0.307587	GOLGI APPARATUS
P35613	BSG	0	0	0	0	0	0	0	0	0	0	1	PLASMA MEMBRANE
P35625	TIMP3	0	0	0	0	0.480972	0.350432	0	0	0	0	0.168596	GOLGI APPARATUS
P35637	FUS	0	0	0	0	0	0	0	0.345519	0.654481	0	0	NUCLEUS
P35658-5	NUP214	0	0.596187	0	0	0	0	0	0	0.403813	0	0	CHROMATIN
P35659	DEK	0	0.664212	0	0	0	0	0	0	0.335788	0	0	CHROMATIN
P35914	HMGCL	0	0	0	0	0	0	0.69962	0	0	0.30038	0	MITOCHONDRIA
P35998	PSMC2	0	0	0.72479	0	0	0	0	0	0.27521	0	0	CYTOSOL
P36222	CHI3L1	0	0	0	0.422899	0.22001	0.357091	0	0	0	0	0	ENDOPLASMIC RETICULUM
P36404	ARL2.00	0	0	0.603209	0	0	0	0	0	0.396791	0	0	CYTOSOL
P36405	ARL3.00	0	0	1	0	0	0	0	0	0	0	0	CYTOSOL
P36507	MAP2K2	0	0	1	0	0	0	0	0	0	0	0	CYTOSOL
P36542	ATP5C1	0	0	0	0	0	0	1	0	0	0	0	MITOCHONDRIA
P36543	ATP6V1E1	0	0	0.350144	0	0	0.383433	0	0	0	0	0.266423	LYSOSOME
P36551	CPOX	0	0	0	0	0	0	1	0	0	0	0	MITOCHONDRIA
P36578	RPL4	1	0	0	0	0	0	0	0	0	0	0	40S/60S RIBOSOME
P36639	NUDT1	0	0	0.703822	0	0	0	0	0	0.296178	0	0	CYTOSOL
P36776	LONP1	0	0	0	0	0	0	1	0	0	0	0	MITOCHONDRIA
P36871		0	0	1	0	0	0	0	0	0	0	0	CYTOSOL
P36915		0	0	1	0	0	0	0	0	0	0	0	CYTOSOL
P36957	DLST	0	0	0	0	0	0	1	0	0	0	0	MITOCHONDRIA
P36969	GPX4	0	0	0.421906	0	0	0	0	0	0.578094	0	0	NUCLEUS
P37108	SRP14	0.203221	0	0	0	0	0	0	0	0.796779	0	0	NUCLEUS
P37198	NUP62	0	0	0.452227	0	0	0	0	0	0.547773	0	0	NUCLEUS
P37235	HPCAL1	0	0	1	0	0	0	0	0	0	0	0	CYTOSOL
P37268	FDFT1	0	0	0	1	0	0	0	0	0	0	0	ENDOPLASMIC RETICULUM
P37287	PIGA	0	0	0	0.4532	0.209862	0.336938	0	0	0	0	0	ENDOPLASMIC RETICULUM
P37802	TAGLN2	0	0	1	0	0	0	0	0	0	0	0	CYTOSOL
P37837	TALDO1	0	0	1	0	0	0	0	0	0	0	0	CYTOSOL
P38117	ETFB	0	0	0	0	0	0	1	0	0	0	0	MITOCHONDRIA
P38159		0.20851	0	0	0	0	0	0	0.79149	0	0	0	NUCLEOLUS
P38398-7		0	0.626596	0	0	0	0	0	0	0.373404	0	0	CHROMATIN
P38432	COIL	0	0.635422	0	0	0	0	0	0	0.364578	0	0	CHROMATIN
P38435	GGCX	0	0	0	0.660849	0.339151	0	0	0	0	0	0	ENDOPLASMIC RETICULUM
P38606	ATP6V1A	0	0	0.671418	0	0	0.328582	0	0	0	0	0	CYTOSOL
P38646	HSPA9	0	0	0	0	0	0	1	0	0	0	0	MITOCHONDRIA
P38919	EIF4A3	0	0	0.216613	0	0	0	0	0.249944	0.533443	0	0	NUCLEUS
P38935		0	0	0	0	0.283865	0	0	0	0	0	0.716135	PLASMA MEMBRANE
P39019	RPS19	1	0	0	0	0	0	0	0	0	0	0	40S/60S RIBOSOME
P39023	RPL3	0.52112	0	0	0.248386	0	0	0	0	0	0.230493	0	40S/60S RIBOSOME
P39656	DDOST	0	0	0	0.828265	0	0	0.171735	0	0	0	0	ENDOPLASMIC RETICULUM
P39687	ANP32A	0	0	0.654788	0	0	0	0	0	0.345212	0	0	CYTOSOL
P39748	FEN1	0	0.361949	0.138296	0	0	0	0	0	0.499754	0	0	NUCLEUS
P40121	CAPG	0	0	1	0	0	0	0	0	0	0	0	CYTOSOL
P40222	TXLNA	0	0.677068	0	0	0	0	0	0	0.322932	0	0	CHROMATIN
P40227	CCT6A	0	0	0.639849	0	0	0	0	0	0.360151	0	0	CYTOSOL
P40306	PSMB10	0	0	0.843536	0	0	0	0	0	0	0	0.156464	CYTOSOL
P40429	RPL13A	0.502213	0	0	0.236469	0	0	0	0	0	0.261318	0	40S/60S RIBOSOME
P40763	STAT3	0	0	0.734119	0	0	0	0	0	0.265881	0	0	CYTOSOL
P40818	USP8	0.352432	0	0	0	0.647568	0	0	0	0	0	0	GOLGI APPARATUS
P40925-3	MDH1	0	0	1	0	0	0	0	0	0	0	0	CYTOSOL
P40926	MDH2	0.174489	0	0	0	0	0	0.825511	0	0	0	0	MITOCHONDRIA
P40937	RFC5	0	0	0.167385	0	0	0	0	0	0.832615	0	0	NUCLEUS
P40938	RFC3	0	0.258907	0	0	0	0	0	0	0.741093	0	0	NUCLEUS
P40939	HADHA	0	0	0	0	0	0	1	0	0	0	0	MITOCHONDRIA
P41091	EIF2S3	0	0	0.187006	0	0	0	0	0	0.812994	0	0	NUCLEUS
P41208		0	0.735067	0	0	0	0	0	0	0.264933	0	0	CHROMATIN
P41218	MNDA	0	1	0	0	0	0	0	0	0	0	0	CHROMATIN
P41223	BUD31	0	0	0	0	0	0	0	0.496817	0.503183	0	0	NUCLEUS
P41226	UBA7	0	0	1	0	0	0	0	0	0	0	0	CYTOSOL
P41227	NAA10	0	0	0.700318	0	0	0	0	0	0.299682	0	0	CYTOSOL
P41240	CSK	0	0	0.750115	0	0	0	0	0	0	0	0.249885	CYTOSOL
P41250	GARS	0	0	0.39088	0	0	0	0.181202	0	0.427918	0	0	NUCLEUS
P41252	IARS	0	0	0.614794	0	0	0	0	0	0.385206	0	0	CYTOSOL
P41440	SLC19A1	0	0	0	0	0	0.258997	0	0	0	0	0.741003	PLASMA MEMBRANE
P42025		0	0	0.580551	0	0	0	0	0	0.285594	0	0.133855	CYTOSOL
P42126	ECI1	0	0	0	0	0	0	1	0	0	0	0	MITOCHONDRIA
P42166	TMPO	0	1	0	0	0	0	0	0	0	0	0	CHROMATIN
P42167	TMPO	0	1	0	0	0	0	0	0	0	0	0	CHROMATIN
P42224		0	0	0.665982	0	0	0	0	0	0.334018	0	0	CYTOSOL
P42226	STAT6	0	0	0.698081	0	0	0	0	0	0.301919	0	0	CYTOSOL
P42285	SKIV2L2	0	0	0	0	0	0	0	0	1	0	0	NUCLEUS
P42331-4	ARHGAP25	0	0	1	0	0	0	0	0	0	0	0	CYTOSOL
P42338		0	0.289286	0.24529	0	0	0	0	0	0.465424	0	0	NUCLEUS
P42345	MTOR	0	0	0	0	0.53838	0.46162	0	0	0	0	0	GOLGI APPARATUS
P42356	PI4KA	0	0	0	0	0	0	0	0	0	0	1	PLASMA MEMBRANE
P42566	EPS15	0	0	1	0	0	0	0	0	0	0	0	CYTOSOL
P42574	CASP3	0	0	1	0	0	0	0	0	0	0	0	CYTOSOL
P42677	RPS27	0.720168	0	0.279832	0	0	0	0	0	0	0	0	40S/60S RIBOSOME
P42695		0	1	0	0	0	0	0	0	0	0	0	CHROMATIN
P42696	RBM34	0.294314	0	0	0	0	0	0	0.705686	0	0	0	NUCLEOLUS
P42704	LRPPRC	0	0	0	0	0	0	1	0	0	0	0	MITOCHONDRIA
P42765	ACAA2	0	0	0	0	0	0	1	0	0	0	0	MITOCHONDRIA
P42766	RPL35	0.508251	0	0	0	0	0	0.219722	0	0	0.272028	0	40S/60S RIBOSOME
P42768	WAS	0.269836	0	0	0	0.378247	0	0	0	0	0	0.351916	GOLGI APPARATUS
P42785	PRCP	0	0	0	0	0.196159	0.803841	0	0	0	0	0	LYSOSOME
P42858		0	0	1	0	0	0	0	0	0	0	0	CYTOSOL
P42892		0	0	0	0	0.336946	0.284514	0	0	0	0	0.37854	PLASMA MEMBRANE
P43007	SLC1A4	0	0	0	0	0.177843	0.207577	0	0	0	0	0.61458	PLASMA MEMBRANE
P43155	CRAT	0	0	0	0	0	0	1	0	0	0	0	MITOCHONDRIA
P43243	MATR3	0	0	0	0	0	0	0	0.436297	0.563703	0	0	NUCLEUS
P43246	MSH2	0	0.475549	0	0	0	0	0	0	0.524451	0	0	NUCLEUS
P43250-2		0	0	0	0	0	0	0	0	0	0	1	PLASMA MEMBRANE
P43251-2	BTD	0.201406	0	0	0	0.257443	0.414646	0	0	0	0	0.126505	LYSOSOME
P43304	GPD2	0	0	0	0	0	0	1	0	0	0	0	MITOCHONDRIA
P43307	SSR1	0	0	0	0.732211	0	0	0.267788	0	0	0	0	ENDOPLASMIC RETICULUM
P43353	ALDH3B1	0	0	0	0	0	0	0	0	0	0	1	PLASMA MEMBRANE
P43378		0	0	0	0	0.39989	0.434199	0	0	0	0	0.16591	LYSOSOME
P43405	SYK	0.444712	0	0	0	0	0	0	0	0.555288	0	0	NUCLEUS
P43487	RANBP1	0	0	1	0	0	0	0	0	0	0	0	CYTOSOL
P43490	NAMPT	0	0	0.602982	0	0	0	0	0	0.397018	0	0	CYTOSOL
P43686	PSMC4	0	0	0.755643	0	0	0	0	0	0.244357	0	0	CYTOSOL
P43897	TSFM	0	0	0	0	0	0	1	0	0	0	0	MITOCHONDRIA
P45954	ACADSB	0	0	0	0	0	0	1	0	0	0	0	MITOCHONDRIA
P45973	CBX5	0	0.630828	0	0	0	0	0	0	0.369172	0	0	CHROMATIN
P45974	USP5	0	0	1	0	0	0	0	0	0	0	0	CYTOSOL
P46013		0	1	0	0	0	0	0	0	0	0	0	CHROMATIN
P46060	RANGAP1	0	0.353953	0.117376	0	0	0	0	0	0.52867	0	0	NUCLEUS
P46063	RECQL	0	0.738848	0	0	0	0	0	0	0.261152	0	0	CHROMATIN
P46100	ATRX	0	0.568705	0	0	0	0	0	0	0.431295	0	0	CHROMATIN
P46109	CRKL	0	0	0.760234	0	0	0	0	0	0.239766	0	0	CYTOSOL
P46199	MTIF2	0	0	0	0	0.354637	0	0.645363	0	0	0	0	MITOCHONDRIA
P46379-3	BAG6	0	0	0.693327	0	0	0	0	0	0.306673	0	0	CYTOSOL
P46459	NSF	0	0	1	0	0	0	0	0	0	0	0	CYTOSOL
P46531	NOTCH1	0	0	0	0	0.381632	0.188452	0	0	0	0	0.429917	PLASMA MEMBRANE
P46776	RPL27A	0.543756	0	0	0.224236	0	0	0	0	0	0.232008	0	40S/60S RIBOSOME
P46777	RPL5	1	0	0	0	0	0	0	0	0	0	0	40S/60S RIBOSOME
P46778	RPL21	0.573837	0	0	0.207066	0	0	0	0	0	0.219097	0	40S/60S RIBOSOME
P46779	RPL28	0.544896	0	0	0.22911	0	0	0	0	0	0.225993	0	40S/60S RIBOSOME
P46781	RPS9	1	0	0	0	0	0	0	0	0	0	0	40S/60S RIBOSOME
P46782	RPS5	1	0	0	0	0	0	0	0	0	0	0	40S/60S RIBOSOME
P46783	RPS10	0.785047	0	0.214953	0	0	0	0	0	0	0	0	40S/60S RIBOSOME
P46939	UTRN	0	0	0	0	0	0.234769	0	0	0	0	0.765231	PLASMA MEMBRANE
P46940	IQGAP1	0	0	0.868747	0	0	0	0	0	0	0	0.131253	CYTOSOL
P46977	STT3A	0	0	0	0.619989	0	0	0.158398	0	0	0.221613	0	ENDOPLASMIC RETICULUM
P47224		0	0	0.625023	0	0	0	0	0	0	0	0.374977	CYTOSOL
P47755	CAPZA2	0	0	1	0	0	0	0	0	0	0	0	CYTOSOL
P47756-2	CAPZB	0	0	1	0	0	0	0	0	0	0	0	CYTOSOL
P47897	QARS	0	0	0.644218	0	0	0	0	0	0.355782	0	0	CYTOSOL
P47914	RPL29	1	0	0	0	0	0	0	0	0	0	0	40S/60S RIBOSOME
P47974		0	0	1	0	0	0	0	0	0	0	0	CYTOSOL
P47985	UQCRFS1	0	0	0	0	0	0	1	0	0	0	0	MITOCHONDRIA
P48047	ATP5O	0.223066	0	0	0	0	0	0.776934	0	0	0	0	MITOCHONDRIA
P48059-3	LIMS1	0	0	0.363778	0	0	0	0	0	0	0	0.636222	PLASMA MEMBRANE
P48060		0	0	0	0	0	0.738934	0	0	0	0	0.261066	LYSOSOME
P48147	PREP	0	0	1	0	0	0	0	0	0	0	0	CYTOSOL
P48426	PIP4K2A	0	0	0	0	0	0	0	0	0	0	1	PLASMA MEMBRANE
P48444	ARCN1	0	0	0.677868	0	0	0	0	0	0.322132	0	0	CYTOSOL
P48449	LSS	0	0	0	1	0	0	0	0	0	0	0	ENDOPLASMIC RETICULUM
P48507	GCLM	0	0	1	0	0	0	0	0	0	0	0	CYTOSOL
P48509	CD151	0	0	0	0	0	0	0	0	0	0	1	PLASMA MEMBRANE
P48553	TRAPPC10	0	0	0	0	0.27892	0	0	0	0	0	0.72108	PLASMA MEMBRANE
P48556	PSMD8	0	0	1	0	0	0	0	0	0	0	0	CYTOSOL
P48595		0	0	1	0	0	0	0	0	0	0	0	CYTOSOL
P48634	PRRC2A	1	0	0	0	0	0	0	0	0	0	0	40S/60S RIBOSOME
P48637	GSS	0	0	1	0	0	0	0	0	0	0	0	CYTOSOL
P48643	CCT5	0	0	1	0	0	0	0	0	0	0	0	CYTOSOL
P48651	PTDSS1	0	0	0	0.640248	0	0	0	0	0	0.359752	0	ENDOPLASMIC RETICULUM
P48723	HSPA13	0.22427	0	0	0.626811	0	0	0.148919	0	0	0	0	ENDOPLASMIC RETICULUM
P48729-2		0.328461	0	0	0	0	0	0	0.671539	0	0	0	NUCLEOLUS
P48735	IDH2	0	0	0	0	0	0	1	0	0	0	0	MITOCHONDRIA
P48960	CD97	0	0	0	0	0	0.183802	0	0	0	0	0.816198	PLASMA MEMBRANE
P49005		0	0	0.316689	0	0	0	0	0	0.683311	0	0	NUCLEUS
P49023-3		0	0	0.481143	0	0	0	0	0	0	0	0.518857	PLASMA MEMBRANE
P49069	CAMLG	0	0	0	1	0	0	0	0	0	0	0	ENDOPLASMIC RETICULUM
P49137	MAPKAPK2	0	0	1	0	0	0	0	0	0	0	0	CYTOSOL
P49189	ALDH9A1	0.187905	0	0.201105	0	0	0	0.30779	0	0.3032	0	0	MITOCHONDRIA
P49207	RPL34	0.559746	0	0	0.224073	0	0	0	0	0	0.216181	0	40S/60S RIBOSOME
P49247	RPIA	0	0	0.639313	0	0	0	0	0	0.360688	0	0	CYTOSOL
P49257	LMAN1	0	0	0	0.586273	0.215434	0.198292	0	0	0	0	0	ENDOPLASMIC RETICULUM
P49321-3	NASP	0	0	1	0	0	0	0	0	0	0	0	CYTOSOL
P49327	FASN	0	0	1	0	0	0	0	0	0	0	0	CYTOSOL
P49368	CCT3	0	0	0.6468	0	0	0	0	0	0.3532	0	0	CYTOSOL
P49406	MRPL19	0	0	0	0	0	0	1	0	0	0	0	MITOCHONDRIA
P49407-2		0	0	1	0	0	0	0	0	0	0	0	CYTOSOL
P49411	TUFM	0	0	0	0	0	0	1	0	0	0	0	MITOCHONDRIA
P49448	GLUD2	0	0	0	0	0	0	1	0	0	0	0	MITOCHONDRIA
P49458	SRP9	0	0	0.186533	0	0	0	0	0	0.813467	0	0	NUCLEUS
P49585	PCYT1A	0	0	0.597387	0	0	0	0	0	0.402613	0	0	CYTOSOL
P49588	AARS	0	0	1	0	0	0	0	0	0	0	0	CYTOSOL
P49590	HARS2	0	0	0	0	0	0	1	0	0	0	0	MITOCHONDRIA
P49591	SARS	0	0	1	0	0	0	0	0	0	0	0	CYTOSOL
P49593	PPM1F	0	0	1	0	0	0	0	0	0	0	0	CYTOSOL
P49674		0	0	0	0	0	0	0	0.458359	0	0	0.541641	PLASMA MEMBRANE
P49711	CTCF	0	1	0	0	0	0	0	0	0	0	0	CHROMATIN
P49715-4		0	1	0	0	0	0	0	0	0	0	0	CHROMATIN
P49720		0	0	1	0	0	0	0	0	0	0	0	CYTOSOL
P49721		0	0	1	0	0	0	0	0	0	0	0	CYTOSOL
P49736	MCM2	0	0	0.528874	0	0	0	0	0	0.471126	0	0	CYTOSOL
P49748-3	ACADVL	0	0	0	0	0	0	1	0	0	0	0	MITOCHONDRIA
P49750-4		0	0.423703	0	0	0	0	0	0.304399	0.271899	0	0	CHROMATIN
P49755	TMED10	0	0	0	0.689485	0.310515	0	0	0	0	0	0	ENDOPLASMIC RETICULUM
P49756	RBM25	0	0	0	0	0	0	0	0	1	0	0	NUCLEUS
P49757	NUMB	0	0	0	0	0	0.39707	0	0	0	0	0.60293	PLASMA MEMBRANE
P49768	PSEN1	0	0	0	0	0	0.196901	0	0	0	0	0.803099	PLASMA MEMBRANE
P49773	HINT1	0	0	1	0	0	0	0	0	0	0	0	CYTOSOL
P49790-3	NUP153	0	0.700113	0	0	0	0	0	0	0.299887	0	0	CHROMATIN
P49792	RANBP2	0	1	0	0	0	0	0	0	0	0	0	CHROMATIN
P49795	RGS19	0	0	0	0	0	0	0	0	0	0	1	PLASMA MEMBRANE
P49810	PSEN2	0	0	0	0	0	0.163215	0	0	0	0	0.836785	PLASMA MEMBRANE
P49821	NDUFV1	0	0	0	0	0	0	1	0	0	0	0	MITOCHONDRIA
P49840	GSK3A	0	0	0.42622	0	0	0	0	0	0	0	0.57378	PLASMA MEMBRANE
P49841-2	GSK3B	0	0	0	0	0	0	0	0	0	0	1	PLASMA MEMBRANE
P49915	GMPS	0	0	0.526072	0	0	0	0	0	0.473928	0	0	CYTOSOL
P49916	LIG3	0	1	0	0	0	0	0	0	0	0	0	CHROMATIN
P49959-3	MRE11A	0	0.67079	0	0	0	0	0	0	0.32921	0	0	CHROMATIN
P50148	GNAQ	0	0	0	0	0	0	0	0	0	0	1	PLASMA MEMBRANE
P50151	GNG10	0	0	0	0	0	0	0	0	0	0	1	PLASMA MEMBRANE
P50213	IDH3A	0	0	0	0	0	0	1	0	0	0	0	MITOCHONDRIA
P50225	SULT1A1	0	0	1	0	0	0	0	0	0	0	0	CYTOSOL
P50238	CRIP1	0	0	0	0	0	0	0	0	0	0	1	PLASMA MEMBRANE
P50281	MMP14	0	0	0	0	0	0.182373	0	0	0	0	0.817627	PLASMA MEMBRANE
P50336	PPOX	0	0	0	0	0	0	0.735579	0	0	0.264421	0	MITOCHONDRIA
P50395	GDI2	0	0	1	0	0	0	0	0	0	0	0	CYTOSOL
P50416	CPT1A	0	0	0	0.417841	0	0	0.288173	0	0	0.293986	0	ENDOPLASMIC RETICULUM
P50440-2	GATM	0	0	0	0	0	0	1	0	0	0	0	MITOCHONDRIA
P50452	SERPINB8	0	0	1	0	0	0	0	0	0	0	0	CYTOSOL
P50454	SERPINH1	0.432029	0	0	0.567971	0	0	0	0	0	0	0	ENDOPLASMIC RETICULUM
P50479	PDLIM4	0	0	0.20809	0	0	0	0	0	0	0	0.79191	PLASMA MEMBRANE
P50502	ST13P4	0	0	1	0	0	0	0	0	0	0	0	CYTOSOL
P50552	VASP	0	0	0	0	0.399313	0	0	0	0	0	0.600687	PLASMA MEMBRANE
P50750-2		0	0	0.174599	0	0.255123	0	0	0	0.570279	0	0	NUCLEUS
P50895	BCAM	0	0	0	0	0	0	0	0	0	0	1	PLASMA MEMBRANE
P50897	PPT1	0	0	0	0	0	0.811094	0	0	0	0	0.188906	LYSOSOME
P50914	RPL14	0.395314	0	0	0.365034	0	0	0	0	0	0.239652	0	40S/60S RIBOSOME
P50990	CCT8	0	0	1	0	0	0	0	0	0	0	0	CYTOSOL
P50991	CCT4	0	0	0.744683	0	0	0	0	0	0.255317	0	0	CYTOSOL
P50995	ANXA11	0	0	1	0	0	0	0	0	0	0	0	CYTOSOL
P51003	PAPOLA	0	0	1	0	0	0	0	0	0	0	0	CYTOSOL
P51148-2	RAB5C	0	0	0	0	0.423798	0.576202	0	0	0	0	0	LYSOSOME
P51149	RAB7A	0	0	0	0	0.492633	0.507367	0	0	0	0	0	LYSOSOME
P51151	RAB9A	0	0	0	0	0.308012	0.545387	0	0	0	0	0.146601	LYSOSOME
P51153	RAB13	0	0	0	0	0	0.250891	0	0	0	0	0.749109	PLASMA MEMBRANE
P51159	RAB27A	0	0	0	0.584602	0.415398	0	0	0	0	0	0	ENDOPLASMIC RETICULUM
P51398	DAP3	0	0	0	0	0	0	1	0	0	0	0	MITOCHONDRIA
P51452	DUSP3	0	0	0.737904	0	0	0	0	0	0.262096	0	0	CYTOSOL
P51531-2	SMARCA2	0	1	0	0	0	0	0	0	0	0	0	CHROMATIN
P51553	IDH3G	0	0	0	0	0	0	1	0	0	0	0	MITOCHONDRIA
P51570-2	GALK1	0	0	1	0	0	0	0	0	0	0	0	CYTOSOL
P51571	SSR4	0	0	0	1	0	0	0	0	0	0	0	ENDOPLASMIC RETICULUM
P51572-2	BCAP31	0	0	0	1	0	0	0	0	0	0	0	ENDOPLASMIC RETICULUM
P51610	HCFC1	0	0.693177	0	0	0	0	0	0	0.306823	0	0	CHROMATIN
P51649-2	ALDH5A1	0	0	0	0	0	0	1	0	0	0	0	MITOCHONDRIA
P51659	HSD17B4	0	0	0	0	0	0	0.217557	0	0	0.782443	0	PEROXISOME
P51665	PSMD7	0	0	0.587451	0	0	0	0	0	0.412549	0	0	CYTOSOL
P51689	ARSD	0	0	0	0.512622	0.259547	0	0	0	0	0.227831	0	ENDOPLASMIC RETICULUM
P51787	KCNQ1	0	0	0	0	0	0.276261	0	0	0	0	0.723739	PLASMA MEMBRANE
P51797-5	CLCN6	0	0	0	0	0	0.712125	0	0	0	0	0.287875	LYSOSOME
P51798	CLCN7	0	0	0	0	0	0.559016	0	0	0	0	0.440984	LYSOSOME
P51809	VAMP7	0	0	0	0	0	0.693496	0	0	0	0	0.306504	LYSOSOME
P51812	RPS6KA3	0	0	1	0	0	0	0	0	0	0	0	CYTOSOL
P51828	ADCY7	0	0	0	0	0	0.192009	0	0	0	0	0.807991	PLASMA MEMBRANE
P51858		0	0	0.544659	0	0	0	0	0	0.455341	0	0	CYTOSOL
P51970	NDUFA8	0	0	0	0	0	0	1	0	0	0	0	MITOCHONDRIA
P51991	HNRNPA3	0	0.263528	0.116412	0	0	0	0	0	0.62006	0	0	NUCLEUS
P52209	PGD	0	0	1	0	0	0	0	0	0	0	0	CYTOSOL
P52272	HNRNPM	0	0	0	0	0	0	0	0.610797	0.389203	0	0	NUCLEOLUS
P52292	KPNA2	0	0	0.32108	0	0	0	0	0	0.67892	0	0	NUCLEUS
P52294	KPNA1	0	0	0.69909	0	0	0	0	0	0	0	0.30091	CYTOSOL
P52306-5	RAP1GDS1	0	0	1	0	0	0	0	0	0	0	0	CYTOSOL
P52429	DGKE	0	0	0	1	0	0	0	0	0	0	0	ENDOPLASMIC RETICULUM
P52565	ARHGDIA	0	0	1	0	0	0	0	0	0	0	0	CYTOSOL
P52566	ARHGDIB	0	0	1	0	0	0	0	0	0	0	0	CYTOSOL
P52594-4	AGFG1	0.209986	0	0	0	0.371597	0	0	0	0	0	0.418417	PLASMA MEMBRANE
P52597	HNRNPF	0	0	0.256517	0	0	0	0	0	0.743483	0	0	NUCLEUS
P52630	STAT2	0	0	0.527586	0	0	0	0	0	0	0	0.472414	CYTOSOL
P52701	MSH6	0	1	0	0	0	0	0	0	0	0	0	CHROMATIN
P52732	KIF11	0	0.468056	0	0	0	0	0	0	0.531944	0	0	NUCLEUS
P52758	HRSP12	0	0	0.630009	0	0	0	0.369991	0	0	0	0	CYTOSOL
P52789	HK2	0	0	0.521025	0	0	0	0	0	0.478975	0	0	CYTOSOL
P52815	MRPL12	0	0	0	0	0	0	1	0	0	0	0	MITOCHONDRIA
P52888	THOP1	0	0	1	0	0	0	0	0	0	0	0	CYTOSOL
P52907	CAPZA1	0	0	1	0	0	0	0	0	0	0	0	CYTOSOL
P52948	NUP98	0	0.566841	0	0	0	0	0	0	0.433159	0	0	CHROMATIN
P53007	SLC25A1	0	0	0	0	0	0	1	0	0	0	0	MITOCHONDRIA
P53041	PPP5C	0	0	1	0	0	0	0	0	0	0	0	CYTOSOL
P53350	PLK1	0.187244	0.31295	0	0	0	0	0	0	0.499806	0	0	NUCLEUS
P53396		0	0	0.46724	0	0	0	0	0	0	0	0.53276	PLASMA MEMBRANE
P53582	METAP1	0	0	0	0	0	0	0	0.35179	0.64821	0	0	NUCLEUS
P53597	SUCLG1	0	0	0	0	0	0	1	0	0	0	0	MITOCHONDRIA
P53602	MVD	0	0	1	0	0	0	0	0	0	0	0	CYTOSOL
P53618	COPB1	0	0	0.673485	0	0	0	0	0	0.326515	0	0	CYTOSOL
P53621	COPA	0	0	0.681469	0	0	0	0	0	0.318531	0	0	CYTOSOL
P53634	CTSC	0	0	0	0	0	1	0	0	0	0	0	LYSOSOME
P53680	AP2S1	0	0	0.186473	0	0.232661	0.429555	0	0	0	0	0.151311	LYSOSOME
P53701	HCCS	0	0	0	0	0	0	1	0	0	0	0	MITOCHONDRIA
P53801	PTTG1IP	0	0	0	0	0	0.465639	0	0	0	0	0.534361	PLASMA MEMBRANE
P53990-2	IST1	0	0	0.649207	0	0	0.350793	0	0	0	0	0	CYTOSOL
P53992	SEC24C	0	0	0	0	0.724668	0.275332	0	0	0	0	0	GOLGI APPARATUS
P53999	SUB1	0	0.245231	0.150526	0	0	0	0	0	0.604242	0	0	NUCLEUS
P54098	POLG	0	0	0	0	0	0	1	0	0	0	0	MITOCHONDRIA
P54105		0	0	1	0	0	0	0	0	0	0	0	CYTOSOL
P54136	RARS	0	0	0.602034	0	0	0	0	0	0.397966	0	0	CYTOSOL
P54577	YARS	0	0	0.485909	0	0	0	0	0	0.514091	0	0	NUCLEUS
P54687		0	0	1	0	0	0	0	0	0	0	0	CYTOSOL
P54709	ATP1B3	0	0	0	0	0	0.312549	0	0	0	0	0.687451	PLASMA MEMBRANE
P54762	EPHB1	0	0	0	0	0	0	0	0	0	0	1	PLASMA MEMBRANE
P54803		0	0	0	0.237558	0.192251	0.570191	0	0	0	0	0	LYSOSOME
P54819-2	AK2	0	0	0	0	0	0	1	0	0	0	0	MITOCHONDRIA
P54920	NAPA	0	0	1	0	0	0	0	0	0	0	0	CYTOSOL
P55010	EIF5	0	0	1	0	0	0	0	0	0	0	0	CYTOSOL
P55011	SLC12A2	0	0	0	0	0	0.671023	0	0	0	0	0.328977	LYSOSOME
P55036	PSMD4	0	0	1	0	0	0	0	0	0	0	0	CYTOSOL
P55060	CSE1L	0	0	0.592789	0	0	0	0	0	0.407211	0	0	CYTOSOL
P55072	VCP	0.280172	0	0.719828	0	0	0	0	0	0	0	0	CYTOSOL
P55082	MFAP3	0	0	0	0	0	0	0	0	0	0	1	PLASMA MEMBRANE
P55084	HADHB	0	0	0	0	0	0	1	0	0	0	0	MITOCHONDRIA
P55145	MANF	0.410501	0	0	0.434267	0	0	0.155232	0	0	0	0	ENDOPLASMIC RETICULUM
P55160	NCKAP1L	0	0	0	0	0.49465	0	0	0	0	0	0.50535	PLASMA MEMBRANE
P55196-5	AFDN	0	0	0	0	0	0	0	0	0	0	1	PLASMA MEMBRANE
P55199		0	0.47647	0	0	0	0	0	0	0.52353	0	0	NUCLEUS
P55209	NAP1L1	0	0	1	0	0	0	0	0	0	0	0	CYTOSOL
P55263		0	0	1	0	0	0	0	0	0	0	0	CYTOSOL
P55265		0	0	0	0	0	0	0	0.656108	0.343892	0	0	NUCLEOLUS
P55735	SEC13	0	0	0.312184	0	0	0	0	0	0.687816	0	0	NUCLEUS
P55769	SNU13	0	0	0	0	0	0	0	0.678844	0.321156	0	0	NUCLEOLUS
P55786	NPEPPS	0	0	1	0	0	0	0	0	0	0	0	CYTOSOL
P55789	GFER	0	0	0	0	0	0	1	0	0	0	0	MITOCHONDRIA
P55795		0	0	0.49629	0	0	0	0	0	0.503711	0	0	NUCLEUS
P55809	OXCT1	0	0	0	0	0	0	1	0	0	0	0	MITOCHONDRIA
P55884-2	EIF3B	0	0	0.606023	0	0	0	0	0	0.393977	0	0	CYTOSOL
P55899	FCGRT	0	0	0	0	0	0.779012	0	0	0	0	0.220988	LYSOSOME
P55957-2	BID	0	0	1	0	0	0	0	0	0	0	0	CYTOSOL
P56181-2	NDUFV3	0.214332	0.237995	0	0	0	0	0.547673	0	0	0	0	MITOCHONDRIA
P56182	RRP1	0	0	0	0	0	0	0	1	0	0	0	NUCLEOLUS
P56192	MARS	0	0	0.718542	0	0	0	0	0	0.281458	0	0	CYTOSOL
P56270-2		0	1	0	0	0	0	0	0	0	0	0	CHROMATIN
P56377	AP1S2	0	0	0.605457	0	0	0.394543	0	0	0	0	0	CYTOSOL
P56378	MP68	0	0	0	0	0	0	1	0	0	0	0	MITOCHONDRIA
P56381	ATP5E	0.277476	0	0	0	0	0	0.722524	0	0	0	0	MITOCHONDRIA
P56385	ATP5I	0	0	0	0	0	0	1	0	0	0	0	MITOCHONDRIA
P56537	EIF6	0.190909	0	0.366001	0	0	0	0	0	0.44309	0	0	NUCLEUS
P56545-2		0	0	0.668742	0	0	0	0	0	0.331258	0	0	CYTOSOL
P56589	PEX3	0.235592	0	0	0	0	0	0	0	0	0.764408	0	PEROXISOME
P56730	PRSS12	0.240725	0	0	0.44559	0	0.313685	0	0	0	0	0	ENDOPLASMIC RETICULUM
P56962	STX17	0.232061	0	0	0	0.306903	0.461037	0	0	0	0	0	LYSOSOME
P57076		0	0	0.351242	0	0	0	0	0	0.648758	0	0	NUCLEUS
P57088	TMEM33	0	0	0	1	0	0	0	0	0	0	0	ENDOPLASMIC RETICULUM
P57105	SYNJ2BP	0	0	0	0	0	0	1	0	0	0	0	MITOCHONDRIA
P57737		0	0	0.2226	0	0	0	0	0	0	0	0.7774	PLASMA MEMBRANE
P57737-3		0	0	0	0.299858	0	0	0.700142	0	0	0	0	MITOCHONDRIA
P57740	NUP107	0	0	0.387276	0	0	0	0	0	0.612724	0	0	NUCLEUS
P57772	EEFSEC	0	0	0	0	0	0	0	0	1	0	0	NUCLEUS
P58335		0	0	0	0	0.186261	0.254695	0	0	0	0	0.559044	PLASMA MEMBRANE
P59998-3	ARPC4	0	0	0.561438	0	0	0	0	0	0.438562	0	0	CYTOSOL
P60033	CD81	0	0	0	0	0	0.216345	0	0	0	0	0.783655	PLASMA MEMBRANE
P60174	TPI1	0	0	1	0	0	0	0	0	0	0	0	CYTOSOL
P60228	EIF3E	0	0	0.610524	0	0	0	0	0	0.389476	0	0	CYTOSOL
P60468	SEC61B	0.249616	0	0	0.482402	0.267982	0	0	0	0	0	0	ENDOPLASMIC RETICULUM
P60604	UBE2G2	0.282721	0	0	0.717279	0	0	0	0	0	0	0	ENDOPLASMIC RETICULUM
P60842	EIF4A1	0	0	0.56686	0	0	0	0	0	0.43314	0	0	CYTOSOL
P60866-2	RPS20	1	0	0	0	0	0	0	0	0	0	0	40S/60S RIBOSOME
P60891	PRPS1	0	0	0.647775	0	0	0	0	0	0.352225	0	0	CYTOSOL
P60953	CDC42	0	0	0.560606	0	0	0	0	0	0	0	0.439394	CYTOSOL
P60981	DSTN	0	0	1	0	0	0	0	0	0	0	0	CYTOSOL
P61006	RAB8A	0	0	0	0	0.348395	0.651605	0	0	0	0	0	LYSOSOME
P61009	SPCS3	0	0	0	1	0	0	0	0	0	0	0	ENDOPLASMIC RETICULUM
P61011	SRP54	0.275981	0	0.25982	0	0	0	0	0	0.464198	0	0	NUCLEUS
P61018-2	RAB4B	0	0	0.249408	0	0.342247	0.408345	0	0	0	0	0	LYSOSOME
P61019	RAB2A	0	0	0	0.365828	0.404187	0.229985	0	0	0	0	0	GOLGI APPARATUS
P61020	RAB5B	0	0	0	0	0.392355	0.493792	0	0	0	0	0.113853	LYSOSOME
P61026	RAB10	0.155174	0	0.111295	0.220225	0.26096	0.252346	0	0	0	0	0	GOLGI APPARATUS
P61081	UBE2M	0	0	1	0	0	0	0	0	0	0	0	CYTOSOL
P61088	UBE2N	0	0	1	0	0	0	0	0	0	0	0	CYTOSOL
P61106	RAB14	0	0	0.3312	0	0.257606	0.411194	0	0	0	0	0	LYSOSOME
P61158	ACTR3	0	0	0.488851	0	0	0	0	0	0.511149	0	0	NUCLEUS
P61160	ACTR2	0	0	0.585372	0	0	0	0	0	0.414628	0	0	CYTOSOL
P61163	ACTR1A	0	0	1	0	0	0	0	0	0	0	0	CYTOSOL
P61221	ABCE1	0.246794	0	0.325255	0	0	0	0	0	0.427951	0	0	NUCLEUS
P61224	RAP1B	0	0	0	0	0.325189	0	0	0	0	0	0.674811	PLASMA MEMBRANE
P61247	RPS3A	1	0	0	0	0	0	0	0	0	0	0	40S/60S RIBOSOME
P61313	RPL15	1	0	0	0	0	0	0	0	0	0	0	40S/60S RIBOSOME
P61353	RPL27	0.575919	0	0	0	0	0	0.146704	0	0	0.277377	0	40S/60S RIBOSOME
P61421	ATP6V0D1	0	0	0	0	0	0.829534	0	0	0	0	0.170466	LYSOSOME
P61513	RPL37A	0.55425	0	0	0.214645	0	0	0	0	0	0.231105	0	40S/60S RIBOSOME
P61586	RHOA	0	0	0.208389	0	0	0	0	0	0	0	0.791611	PLASMA MEMBRANE
P61604	HSPE1	0	0	0	0	0	0	1	0	0	0	0	MITOCHONDRIA
P61619	SEC61A1	0	0	0	0.750383	0	0	0	0	0	0.249617	0	ENDOPLASMIC RETICULUM
P61626	LYZ	0.172612	0	0	0	0	0.827388	0	0	0	0	0	LYSOSOME
P61758	VBP1	0	0	1	0	0	0	0	0	0	0	0	CYTOSOL
P61769	B2M	0	0	0	0	0	0.322711	0	0	0	0	0.677289	PLASMA MEMBRANE
P61803	DAD1	0	0	0	0.427491	0.317596	0	0	0	0	0.254914	0	ENDOPLASMIC RETICULUM
P61916	NPC2	0	0	0	0.221356	0.204624	0.57402	0	0	0	0	0	LYSOSOME
P61923-4	COPZ1	0	0	0.518679	0	0	0	0	0	0.481321	0	0	CYTOSOL
P61927	RPL37	1	0	0	0	0	0	0	0	0	0	0	40S/60S RIBOSOME
P61964	WDR5	0	0.3216	0.205077	0	0	0	0	0	0.473323	0	0	NUCLEUS
P61981	YWHAG	0	0	1	0	0	0	0	0	0	0	0	CYTOSOL
P62070-4	RRAS2	0	0	0	0	0	0	0	0	0	0	1	PLASMA MEMBRANE
P62072	TIMM10	0	0	0	0	0	0	1	0	0	0	0	MITOCHONDRIA
P62081	RPS7	0.726217	0	0.273783	0	0	0	0	0	0	0	0	40S/60S RIBOSOME
P62136	PPP1CA	0	0	0.494334	0	0	0	0	0	0.31049	0	0.195175	CYTOSOL
P62158	CALM1	0	0	1	0	0	0	0	0	0	0	0	CYTOSOL
P62191	PSMC1	0	0	1	0	0	0	0	0	0	0	0	CYTOSOL
P62195	PSMC5	0	0	0.755784	0	0	0	0	0	0.244216	0	0	CYTOSOL
P62241	RPS8	1	0	0	0	0	0	0	0	0	0	0	40S/60S RIBOSOME
P62244	RPS15A	0.594744	0	0	0	0	0	0	0	0.405256	0	0	40S/60S RIBOSOME
P62249	RPS16	1	0	0	0	0	0	0	0	0	0	0	40S/60S RIBOSOME
P62258	YWHAE	0	0	1	0	0	0	0	0	0	0	0	CYTOSOL
P62263	RPS14	1	0	0	0	0	0	0	0	0	0	0	40S/60S RIBOSOME
P62266	RPS23	0.72593	0	0	0.27407	0	0	0	0	0	0	0	40S/60S RIBOSOME
P62269	RPS18	0.688894	0	0	0	0	0	0	0	0.311106	0	0	40S/60S RIBOSOME
P62273	RPS29	0.820938	0	0	0	0	0	0	0	0	0	0.179062	40S/60S RIBOSOME
P62277	RPS13	1	0	0	0	0	0	0	0	0	0	0	40S/60S RIBOSOME
P62280	RPS11	1	0	0	0	0	0	0	0	0	0	0	40S/60S RIBOSOME
P62310		0	0	0.597168	0	0	0	0	0	0.402832	0	0	CYTOSOL
P62316	SNRPD2	0	0	0.164331	0	0	0	0	0	0.835669	0	0	NUCLEUS
P62318	SNRPD3	0	0	0	0	0	0	0	0	1	0	0	NUCLEUS
P62330	ARF6	0	0	0.708134	0	0.291866	0	0	0	0	0	0	CYTOSOL
P62333	PSMC6	0	0	0.666829	0	0	0	0	0	0.333171	0	0	CYTOSOL
P62424	RPL7A	0.50668	0	0	0.24264	0	0	0	0	0	0.250681	0	40S/60S RIBOSOME
P62495	ETF1	0.166068	0	0.279671	0	0	0	0	0	0.554261	0	0	NUCLEUS
P62701	RPS4X	1	0	0	0	0	0	0	0	0	0	0	40S/60S RIBOSOME
P62750	RPL23A	0.540638	0	0	0.219536	0	0	0	0	0	0.239826	0	40S/60S RIBOSOME
P62753	RPS6	1	0	0	0	0	0	0	0	0	0	0	40S/60S RIBOSOME
P62805	HIST1H4A	0	1	0	0	0	0	0	0	0	0	0	CHROMATIN
P62820	RAB1A	0	0	0	0	0.49312	0.326856	0	0	0	0	0.180024	GOLGI APPARATUS
P62826	RAN	0	0	0.535688	0	0	0	0	0	0.464312	0	0	CYTOSOL
P62829	RPL23	1	0	0	0	0	0	0	0	0	0	0	40S/60S RIBOSOME
P62834	RAP1A	0	0	0	0	0.24083	0	0	0	0	0	0.75917	PLASMA MEMBRANE
P62841	RPS15	1	0	0	0	0	0	0	0	0	0	0	40S/60S RIBOSOME
P62847-4		1	0	0	0	0	0	0	0	0	0	0	40S/60S RIBOSOME
P62851	RPS25	1	0	0	0	0	0	0	0	0	0	0	40S/60S RIBOSOME
P62854	RPS26	0.691131	0	0	0	0	0.308869	0	0	0	0	0	40S/60S RIBOSOME
P62857	RPS28	1	0	0	0	0	0	0	0	0	0	0	40S/60S RIBOSOME
P62861	FAU	0.686697	0	0	0	0	0.313303	0	0	0	0	0	40S/60S RIBOSOME
P62873	GNB1	0	0	0	0	0	0	0	0	0	0	1	PLASMA MEMBRANE
P62879	GNB2	0	0	0	0	0	0	0	0	0	0	1	PLASMA MEMBRANE
P62888	RPL30	1	0	0	0	0	0	0	0	0	0	0	40S/60S RIBOSOME
P62899	RPL31	0.538922	0	0	0.23978	0	0	0	0	0	0.221298	0	40S/60S RIBOSOME
P62906	RPL10A	0.5291	0	0	0	0	0	0.145879	0	0	0.325021	0	40S/60S RIBOSOME
P62910	RPL32	1	0	0	0	0	0	0	0	0	0	0	40S/60S RIBOSOME
P62913	RPL11	0.678536	0	0	0	0	0.321464	0	0	0	0	0	40S/60S RIBOSOME
P62917	RPL8	1	0	0	0	0	0	0	0	0	0	0	40S/60S RIBOSOME
P62937	PPIA	0	0	1	0	0	0	0	0	0	0	0	CYTOSOL
P62979	RPS27A	1	0	0	0	0	0	0	0	0	0	0	40S/60S RIBOSOME
P62993	GRB2	0	0	1	0	0	0	0	0	0	0	0	CYTOSOL
P63000-2	RAC1	0	0	0.234512	0	0	0	0	0	0	0	0.765488	PLASMA MEMBRANE
P63010-2	AP2B1	0.225506	0	0.136904	0	0	0.46933	0	0	0	0	0.16826	LYSOSOME
P63027		0	0	0	0	0.188568	0.236977	0	0	0	0	0.574456	PLASMA MEMBRANE
P63096		0	0	0	0	0	0	0	0	0	0	1	PLASMA MEMBRANE
P63104	YWHAZ	0	0	1	0	0	0	0	0	0	0	0	CYTOSOL
P63151-2	PPP2R2A	0	0	1	0	0	0	0	0	0	0	0	CYTOSOL
P63165	SUMO1	0	0.513421	0	0	0	0	0	0	0.486579	0	0	CHROMATIN
P63167	DYNLL1	0	0	0.280151	0	0	0	0	0	0.719849	0	0	NUCLEUS
P63173	RPL38	0.519384	0	0	0.255774	0	0	0	0	0	0.224842	0	40S/60S RIBOSOME
P63208	SKP1	0	0	0.542545	0	0	0	0	0	0.457455	0	0	CYTOSOL
P63218	GNG5	0	0	0	0	0	0.331091	0	0	0	0	0.668909	PLASMA MEMBRANE
P63220	RPS21	0.763386	0	0	0	0	0	0	0	0	0	0.236614	40S/60S RIBOSOME
P63241-2		0.206634	0	0.144267	0	0	0	0	0	0.649098	0	0	NUCLEUS
P63244	RACK1	0.299079	0	0.305528	0	0	0	0	0	0.395393	0	0	NUCLEUS
P63279	UBE2I	0	0	0.202401	0	0	0	0	0	0.797599	0	0	NUCLEUS
P67809	YBX1	0.20168	0	0.195225	0	0	0	0	0.28141	0.321685	0	0	NUCLEUS
P67812-3	SEC11A	0	0	0	0.485947	0	0.255052	0	0	0	0	0.259001	ENDOPLASMIC RETICULUM
P67870	CSNK2B	0	0	1	0	0	0	0	0	0	0	0	CYTOSOL
P67936	TPM4	0	0	1	0	0	0	0	0	0	0	0	CYTOSOL
P68032	ACTG2	0	0	0.605204	0	0	0	0	0	0.394796	0	0	CYTOSOL
P68036-3	UBE2L3	0	0	1	0	0	0	0	0	0	0	0	CYTOSOL
P68104	EEF1A1	0	0.597492	0	0	0	0	0	0	0.402508	0	0	CHROMATIN
P68366		0	0	0.644784	0	0	0	0	0	0	0	0.355216	CYTOSOL
P68371	TUBB4B	0	0	0.73195	0	0	0	0	0	0.26805	0	0	CYTOSOL
P68400	CSNK2A1	0	0	1	0	0	0	0	0	0	0	0	CYTOSOL
P69905	HBA1	0	0.743378	0	0	0	0	0	0	0	0.256622	0	CHROMATIN
P78316	NOP14	0	0	0	0	0	0	0	1	0	0	0	NUCLEOLUS
P78324	SIRPB1	0	0	0	0	0	0	0	0	0	0	1	PLASMA MEMBRANE
P78332		0	0	0	0	0	0	0	0.395459	0.604541	0	0	NUCLEUS
P78347	GTF2I	0	1	0	0	0	0	0	0	0	0	0	CHROMATIN
P78356	PIP4K2B	0	0	0	0	0	0	0	0	0	0	1	PLASMA MEMBRANE
P78368	CSNK1G2	0	0	0	0	0	0	0	0	0	0	1	PLASMA MEMBRANE
P78371	CCT2	0	0	1	0	0	0	0	0	0	0	0	CYTOSOL
P78406	RAE1	0.204502	0.319596	0	0	0	0	0	0	0.475902	0	0	NUCLEUS
P78417	GSTO1	0	0	1	0	0	0	0	0	0	0	0	CYTOSOL
P78527	PRKDC	0	0.50176	0	0	0	0	0	0	0.49824	0	0	CHROMATIN
P78536	ADAM17	0	0	0	0	0	0	0	0	0	0	1	PLASMA MEMBRANE
P80217-2	IFI35	0	0	0.532456	0	0	0	0	0	0.467544	0	0	CYTOSOL
P80303	NUCB2	0	0	0.319726	0.427063	0	0	0.253211	0	0	0	0	ENDOPLASMIC RETICULUM
P80723	BASP1	0	0	0.371717	0	0.283758	0	0	0	0	0	0.344525	CYTOSOL
P82094-2	TMF1	0.288693	0	0.133677	0	0.319794	0.257836	0	0	0	0	0	GOLGI APPARATUS
P82650	MRPS22	0	0	0	0	0	0	1	0	0	0	0	MITOCHONDRIA
P82663	MRPS25	0	0	0	0	0	0	1	0	0	0	0	MITOCHONDRIA
P82673	MRPS35	0	0	0	0	0	0	1	0	0	0	0	MITOCHONDRIA
P82675	MRPS5	0	0	0	0	0	0	1	0	0	0	0	MITOCHONDRIA
P82909	MRPS36	0.359533	0	0	0	0	0	0.640467	0	0	0	0	MITOCHONDRIA
P82912	MRPS11	0	0	0	0	0	0	1	0	0	0	0	MITOCHONDRIA
P82921	MRPS21	0.19787	0	0	0	0	0	0.80213	0	0	0	0	MITOCHONDRIA
P82930	MRPS34	0	0	0	0	0	0	1	0	0	0	0	MITOCHONDRIA
P82933	MRPS9	0	0	0	0	0	0	1	0	0	0	0	MITOCHONDRIA
P82979	SARNP	0	0.712057	0	0	0	0	0	0	0.287943	0	0	CHROMATIN
P83111	LACTB	0	0	0	0	0	0	1	0	0	0	0	MITOCHONDRIA
P83731	RPL24	0.546855	0	0	0.233126	0	0	0	0	0	0.220019	0	40S/60S RIBOSOME
P83881	RPL36A	1	0	0	0	0	0	0	0	0	0	0	40S/60S RIBOSOME
P84077	ARF3	0	0	1	0	0	0	0	0	0	0	0	CYTOSOL
P84090	ERH	0	0	0	0	0	0	0	0.235971	0.764029	0	0	NUCLEUS
P84095	RHOG	0	0	0	0	0.177006	0.204481	0	0	0	0	0.618514	PLASMA MEMBRANE
P84098	RPL19	1	0	0	0	0	0	0	0	0	0	0	40S/60S RIBOSOME
P84101	SERF2	0.373147	0.626853	0	0	0	0	0	0	0	0	0	CHROMATIN
P84103	SRSF3	0	0	0.181937	0	0	0	0	0	0.818063	0	0	NUCLEUS
P84157		0	0	0	0.382559	0.434085	0	0	0	0	0	0.183356	GOLGI APPARATUS
P85037	FOXK1	0	0.616818	0.103502	0	0	0	0	0	0.27968	0	0	CHROMATIN
P86790	CCZ1B	0	0	0	0	0	0.639537	0	0	0	0	0.360463	LYSOSOME
P98082	DAB2	0	0	0	0	0	0.607169	0	0	0	0	0.392831	LYSOSOME
P98155-2	VLDLR	0	0	0	0	0.224313	0.619439	0	0	0	0	0.156248	LYSOSOME
P98160	HSPG2	0.259193	0	0	0.330043	0.218277	0.192487	0	0	0	0	0	ENDOPLASMIC RETICULUM
P98171-2	ARHGAP4	0	0.526963	0	0	0.299241	0	0	0	0	0	0.173797	CHROMATIN
P98175-3	RBM10	0	0	0.135329	0	0	0	0	0.497715	0.366955	0	0	NUCLEOLUS
P98179	RBM3	0	0	0	0	0	0	0	0	1	0	0	NUCLEUS
P98194-7	ATP2C1	0	0	0	0	0.694352	0.305648	0	0	0	0	0	GOLGI APPARATUS
P98196	ATP11A	0	0	0	0	0	0.171369	0	0	0	0	0.828631	PLASMA MEMBRANE
P99999	CYCS	0	0	0	0	0	0	1	0	0	0	0	MITOCHONDRIA
Q00013	MPP1	0	0	0	0	0	0.205894	0	0	0	0	0.794106	PLASMA MEMBRANE
Q00059	TFAM	0	0	0	0	0	0	1	0	0	0	0	MITOCHONDRIA
Q00325-2	SLC25A3	0	0	0	0	0	0	1	0	0	0	0	MITOCHONDRIA
Q00341	HDLBP	0.650161	0	0	0	0	0	0	0	0	0.349839	0	40S/60S RIBOSOME
Q00403		0	0	0.389529	0	0	0	0	0	0.610471	0	0	NUCLEUS
Q00534	CDK6	0	0	1	0	0	0	0	0	0	0	0	CYTOSOL
Q00535	CDK5	0	0	0.783569	0	0	0	0	0	0	0	0.216431	CYTOSOL
Q00577	PURA	0	0	0.618714	0	0	0	0	0	0.381286	0	0	CYTOSOL
Q00610	CLTC	0.190884	0	0.571751	0	0	0.237366	0	0	0	0	0	CYTOSOL
Q00653		0	0	0.595652	0	0	0	0	0	0.404348	0	0	CYTOSOL
Q00688	FKBP3	1	0	0	0	0	0	0	0	0	0	0	40S/60S RIBOSOME
Q00765	REEP5	0.151133	0	0	0.629162	0.219705	0	0	0	0	0	0	ENDOPLASMIC RETICULUM
Q00796	SORD	0.244208	0	0.157448	0	0	0	0	0	0.598345	0	0	NUCLEUS
Q00839	HNRNPU	0	0	0	0	0	0	0	0.293284	0.706716	0	0	NUCLEUS
Q00839-2	HNRNPU	0	0	0	0	0	0	0	0.347436	0.652564	0	0	NUCLEUS
Q01081	U2AF1L4	0	0	0	0	0	0	0	0	1	0	0	NUCLEUS
Q01082	SPTBN1	0	0	0	0	0	0.24845	0	0	0	0	0.75155	PLASMA MEMBRANE
Q01082-3	SPTBN1	0	0	0	0	0	0	0	0	0	0	1	PLASMA MEMBRANE
Q01105-2		0	0	0.760379	0	0	0	0	0	0.239621	0	0	CYTOSOL
Q01130		0	0	0.230061	0	0	0	0	0	0.769939	0	0	NUCLEUS
Q01196-8	RUNX1	0	1	0	0	0	0	0	0	0	0	0	CHROMATIN
Q01433	AMPD2	0	0	1	0	0	0	0	0	0	0	0	CYTOSOL
Q01459	CTBS	0	0	0	0	0.255567	0.744433	0	0	0	0	0	LYSOSOME
Q01469	FABP5	0	0	1	0	0	0	0	0	0	0	0	CYTOSOL
Q01518	CAP1	0	0	0.319127	0	0	0	0	0.236723	0.444149	0	0	NUCLEUS
Q01581	HMGCS1	0	0	1	0	0	0	0	0	0	0	0	CYTOSOL
Q01650	SLC7A5	0	0	0	0	0	0	0	0	0	0	1	PLASMA MEMBRANE
Q01780	EXOSC10	0	0	0	0	0	0	0	0.535711	0.464289	0	0	NUCLEOLUS
Q01813	PFKP	0	0	0.545521	0	0	0	0	0	0.454479	0	0	CYTOSOL
Q01826-2	SATB1	0	1	0	0	0	0	0	0	0	0	0	CHROMATIN
Q01844-5	EWSR1	0.267572	0.312315	0	0	0	0	0	0	0.420113	0	0	NUCLEUS
Q01968	OCRL	0	0	0.199121	0	0.323105	0.323525	0	0	0	0	0.154248	LYSOSOME
Q01970	PLCB3	0	0	0	0	0	0	0	0	0	0	1	PLASMA MEMBRANE
Q02040	AKAP17A	0	0	0	0	0	0	0	0.681886	0.318114	0	0	NUCLEOLUS
Q02127	DHODH	0.178786	0	0	0	0	0	0.821214	0	0	0	0	MITOCHONDRIA
Q02218	OGDH	0	0	0	0	0	0	1	0	0	0	0	MITOCHONDRIA
Q02241	KIF23	0	0.742796	0	0	0	0	0	0	0	0.257204	0	CHROMATIN
Q02252	ALDH6A1	0	0	0	0	0	0	1	0	0	0	0	MITOCHONDRIA
Q02338	BDH1	0	0	0.247713	0	0	0	0.752287	0	0	0	0	MITOCHONDRIA
Q02543	RPL18A	0.449681	0	0	0.252279	0	0	0	0	0	0.298039	0	40S/60S RIBOSOME
Q02556	IRF8	0	0.392272	0.175921	0	0	0	0	0	0.431806	0	0	NUCLEUS
Q02790	FKBP4	0	0	1	0	0	0	0	0	0	0	0	CYTOSOL
Q02809-2	PLOD1	0.321086	0	0	0.678914	0	0	0	0	0	0	0	ENDOPLASMIC RETICULUM
Q02818	NUCB1	0	0	0	0.317114	0.438701	0	0.244186	0	0	0	0	GOLGI APPARATUS
Q02878	RPL6	1	0	0	0	0	0	0	0	0	0	0	40S/60S RIBOSOME
Q02880-2	TOP2B	0	1	0	0	0	0	0	0	0	0	0	CHROMATIN
Q02978	SLC25A11	0	0	0	0	0	0	1	0	0	0	0	MITOCHONDRIA
Q03164-3		0	0.712996	0	0	0	0.287004	0	0	0	0	0	CHROMATIN
Q03169	TNFAIP2	0.176557	0	0.193577	0	0.254276	0	0	0	0.37559	0	0	NUCLEUS
Q03188	CENPC	0	0.8364	0	0	0	0	0.1636	0	0	0	0	CHROMATIN
Q03252	LMNB2	0	0.606213	0	0	0	0	0.182524	0	0	0.211263	0	CHROMATIN
Q03405	PLAUR	0	0	0	0	0	0	0	0	0	0	1	PLASMA MEMBRANE
Q03426	MVK	0	0	0.673337	0	0	0	0	0	0.326663	0	0	CYTOSOL
Q03518	TAP1	0	0	0	0.660112	0	0.339888	0	0	0	0	0	ENDOPLASMIC RETICULUM
Q03519	TAP2	0	0	0	1	0	0	0	0	0	0	0	ENDOPLASMIC RETICULUM
Q03701	CEBPZ	0	0	0	0	0	0	0	1	0	0	0	NUCLEOLUS
Q04206	RELA	0	0	1	0	0	0	0	0	0	0	0	CYTOSOL
Q04323-2	UBXN1	0	0	1	0	0	0	0	0	0	0	0	CYTOSOL
Q04446	GBE1	0	0	1	0	0	0	0	0	0	0	0	CYTOSOL
Q04721	NOTCH2	0	0	0	0	0.573363	0	0	0	0	0	0.426637	GOLGI APPARATUS
Q04726		0	0	0.349951	0	0	0	0	0	0.650048	0	0	NUCLEUS
Q04759	PRKCQ	0	0	0	0	0	0	0	0	0	0	1	PLASMA MEMBRANE
Q04760	GLO1	0	0	1	0	0	0	0	0	0	0	0	CYTOSOL
Q04837	SSBP1	0	0	0	0	0	0	1	0	0	0	0	MITOCHONDRIA
Q04864		0	0	0.782782	0	0	0	0	0	0	0	0.217218	CYTOSOL
Q04917	YWHAH	0	0	1	0	0	0	0	0	0	0	0	CYTOSOL
Q04941	PLP2	0	0	0	0	0	0	0	0	0	0	1	PLASMA MEMBRANE
Q05193	DNM1	0.249549	0	0	0	0.324766	0	0	0	0.425685	0	0	NUCLEUS
Q05209	PTPN12	0	0	1	0	0	0	0	0	0	0	0	CYTOSOL
Q05519		0	0	0.187629	0	0	0	0	0	0.812371	0	0	NUCLEUS
Q05639	EEF1A2	0.244602	0.401985	0	0	0	0	0	0	0.353412	0	0	CHROMATIN
Q05655	PRKCD	0	0	0.680817	0	0	0	0	0	0	0	0.319183	CYTOSOL
Q05823		0	0	0.230699	0	0	0	0	0	0.769301	0	0	NUCLEUS
Q05D32	CTDSPL2	0	1	0	0	0	0	0	0	0	0	0	CHROMATIN
Q06055-2	ATP5G1	0	0	0	0	0	0	0.651208	0	0	0.348792	0	MITOCHONDRIA
Q06124-2	PTPN11	0	0	0.698022	0	0	0	0	0	0.301978	0	0	CYTOSOL
Q06136	KDSR	0	0	0	1	0	0	0	0	0	0	0	ENDOPLASMIC RETICULUM
Q06187-2	BTK	0	0	0.699194	0	0	0	0	0	0.300806	0	0	CYTOSOL
Q06210	GFPT1	0	0	0.445132	0	0	0	0	0	0.554868	0	0	NUCLEUS
Q06323	PSME1	0	0	1	0	0	0	0	0	0	0	0	CYTOSOL
Q06481	APLP2	0	0	0	0	0.322911	0.250072	0	0	0	0	0.427017	PLASMA MEMBRANE
Q06587		0	0.517864	0	0	0	0	0	0	0.482136	0	0	CHROMATIN
Q06787-2		0.40046	0	0	0	0	0	0	0.392325	0	0	0.207216	40S/60S RIBOSOME
Q06787-8		0.41963	0	0	0	0	0	0	0.58037	0	0	0	NUCLEOLUS
Q06830	PRDX1	0	0	1	0	0	0	0	0	0	0	0	CYTOSOL
Q07020	RPL18	0.671194	0	0	0	0	0	0	0	0	0.328806	0	40S/60S RIBOSOME
Q07021	C1QBP	0	0	0	0	0	0	1	0	0	0	0	MITOCHONDRIA
Q07065	CKAP4	0.134492	0	0	0.514269	0	0	0.103189	0	0	0.24805	0	ENDOPLASMIC RETICULUM
Q07666	KHDRBS1	0	1	0	0	0	0	0	0	0	0	0	CHROMATIN
Q07812-2	BAX	0.499259	0	0	0	0	0	0.500741	0	0	0	0	MITOCHONDRIA
Q07820	MCL1	0	0	0	0	0.44412	0	0	0	0	0.347105	0.208775	GOLGI APPARATUS
Q07954	LRP1	0	0	0	0	0	0.620714	0	0	0	0	0.379286	LYSOSOME
Q07955	SRSF1	0	0	0.271214	0	0	0	0	0	0.728786	0	0	NUCLEUS
Q07960	ARHGAP1	0	0	1	0	0	0	0	0	0	0	0	CYTOSOL
Q08209-2	PPP3CA	0	0	0.51929	0	0	0	0	0	0	0	0.48071	CYTOSOL
Q08211	DHX9	0	0	0	0	0	0	0	0.297117	0.702883	0	0	NUCLEUS
Q08257		0	0	0.631663	0	0	0	0.368337	0	0	0	0	CYTOSOL
Q08334	IL10RB	0	0	0	0	0	0	0	0	0	0	1	PLASMA MEMBRANE
Q08357	SLC20A2	0	0	0	0	0	0.512995	0	0	0	0	0.487005	LYSOSOME
Q08378	GOLGA3	0	0	0.435645	0	0	0.227861	0	0	0.336495	0	0	CYTOSOL
Q08379	GOLGA2	0	0.601285	0	0	0	0	0	0	0.398715	0	0	CHROMATIN
Q08380	LGALS3BP	0	0	0	0	0	1	0	0	0	0	0	LYSOSOME
Q08426	EHHADH	0.215323	0	0	0	0	0	0	0	0	0.784677	0	PEROXISOME
Q08722	CD47	0	0	0	0	0	0	0	0	0	0	1	PLASMA MEMBRANE
Q08752	PPID	0	0	0.747872	0	0	0	0	0	0.252128	0	0	CYTOSOL
Q08945	SSRP1	0	0.44829	0	0	0	0	0	0	0.55171	0	0	NUCLEUS
Q08AM6	VAC14	0	0	0.190539	0	0	0	0	0.436976	0.372485	0	0	NUCLEOLUS
Q08ET2		0	0	0	0.356776	0	0.279183	0	0	0	0	0.364042	PLASMA MEMBRANE
Q08J23	NSUN2	0	0	0.734498	0	0	0	0	0	0.265501	0	0	CYTOSOL
Q09028	RBBP4	0	0	0.274908	0	0	0	0	0	0.725092	0	0	NUCLEUS
Q09161	NCBP1	0	0	0.185369	0	0	0	0	0	0.814631	0	0	NUCLEUS
Q09328	MGAT5	0	0	0	0	0.312869	0.282846	0	0	0	0	0.404285	PLASMA MEMBRANE
Q09472	EP300	0	0.391212	0	0	0	0	0	0.339205	0.269583	0	0	CHROMATIN
Q09666	AHNAK	0	0	0	0	0.808363	0	0	0	0	0	0.191637	GOLGI APPARATUS
Q0JRZ9	FCHO2	0	0	0.417758	0	0	0	0	0	0	0	0.582242	PLASMA MEMBRANE
Q0VD83-4	APOBR	0.276461	0	0.723539	0	0	0	0	0	0	0	0	CYTOSOL
Q0VDF9	HSPA14	0	0	0.278674	0	0	0	0	0	0.721326	0	0	NUCLEUS
Q10469	MGAT2	0	0	0	0	1	0	0	0	0	0	0	GOLGI APPARATUS
Q10471	GALNT2	0	0	0	0	1	0	0	0	0	0	0	GOLGI APPARATUS
Q10472	GALNT1	0	0	0	0	0.810295	0	0.189706	0	0	0	0	GOLGI APPARATUS
Q10570	CPSF1	0	0	0.124648	0	0	0	0	0.269022	0.60633	0	0	NUCLEUS
Q10588	BST1	0	0	0	0	0	0	0	0	0	0	1	PLASMA MEMBRANE
Q10589	BST2	0	0	0	0	0	0.295008	0	0	0	0	0.704992	PLASMA MEMBRANE
Q10713	PMPCA	0	0	0	0	0	0	1	0	0	0	0	MITOCHONDRIA
Q11201	ST3GAL1	0	0	0	0	0.745761	0	0	0	0	0	0.254239	GOLGI APPARATUS
Q12768	KIAA0196	0	0	0.251009	0	0.248632	0.500358	0	0	0	0	0	LYSOSOME
Q12769	NUP160	0	0	0.332726	0	0	0	0	0	0.667274	0	0	NUCLEUS
Q12770	SCAP	0	0	0	1	0	0	0	0	0	0	0	ENDOPLASMIC RETICULUM
Q12772	SREBF2	0.259867	0	0	0.740133	0	0	0	0	0	0	0	ENDOPLASMIC RETICULUM
Q12788	TBL3	0	0	0	0	0	0	0	1	0	0	0	NUCLEOLUS
Q12797	ASPH	0.176808	0	0	0.593168	0	0	0	0	0	0.230025	0	ENDOPLASMIC RETICULUM
Q12830	BPTF	0	1	0	0	0	0	0	0	0	0	0	CHROMATIN
Q12834	CDC20	0	1	0	0	0	0	0	0	0	0	0	CHROMATIN
Q12846	STX4	0	0	0	0	0	0.31762	0	0	0	0	0.68238	PLASMA MEMBRANE
Q12849	GRSF1	0	0	0	0	0	0	1	0	0	0	0	MITOCHONDRIA
Q12874	SF3A3	0	0	0.161969	0	0	0	0	0	0.838031	0	0	NUCLEUS
Q12882	DPYD	0	0	1	0	0	0	0	0	0	0	0	CYTOSOL
Q12904-2	AIMP1	0	0	1	0	0	0	0	0	0	0	0	CYTOSOL
Q12905	ILF2	0	0	0.197711	0	0	0	0	0	0.802289	0	0	NUCLEUS
Q12906-7	ILF3	0	0	0	0	0	0	0	0.340441	0.659559	0	0	NUCLEUS
Q12907	LMAN2	0	0	0	1	0	0	0	0	0	0	0	ENDOPLASMIC RETICULUM
Q12912	LRMP	0	0	0	1	0	0	0	0	0	0	0	ENDOPLASMIC RETICULUM
Q12913	PTPRJ	0	0	0	0	0	0	0	0	0	0	1	PLASMA MEMBRANE
Q12931	TRAP1	0	0	0	0	0	0	1	0	0	0	0	MITOCHONDRIA
Q12933-2	TRAF2	0	0	0.539134	0	0	0	0	0	0.460866	0	0	CYTOSOL
Q12959-2		0	0	0	0	0	0.462972	0	0	0	0	0.537028	PLASMA MEMBRANE
Q12962		0	0.491717	0	0	0	0	0	0	0.508283	0	0	NUCLEUS
Q12965	MYO1E	0	0	0.388077	0	0	0	0	0	0	0	0.611923	PLASMA MEMBRANE
Q12972		0	0	0	0	0	0	0	0.459015	0.540985	0	0	NUCLEUS
Q12979	ABR	0	0	0.372243	0	0	0	0	0	0	0	0.627757	PLASMA MEMBRANE
Q12981	BNIP1	0	0	0	0.584879	0	0.415121	0	0	0	0	0	ENDOPLASMIC RETICULUM
Q12986	NFX1	0.37439	0	0	0	0	0	0	0.62561	0	0	0	NUCLEOLUS
Q12996	CSTF3	0	0	0	0	0	0	0	0.35193	0.64807	0	0	NUCLEUS
Q13011	ECH1	0	0	0	0	0	0	0.772499	0	0	0.227501	0	MITOCHONDRIA
Q13043	STK4	0	0	0.801551	0	0	0	0	0	0	0	0.198449	CYTOSOL
Q13057-2	COASY	0	0	0.808647	0	0	0	0.191353	0	0	0	0	CYTOSOL
Q13084	MRPL28	0	0	0	0	0	0	1	0	0	0	0	MITOCHONDRIA
Q13085-4	ACACA	0	0	1	0	0	0	0	0	0	0	0	CYTOSOL
Q13094	LCP2	0	0	0.554578	0	0	0	0	0	0.445422	0	0	CYTOSOL
Q13098-7	GPS1	0	0	1	0	0	0	0	0	0	0	0	CYTOSOL
Q13107	USP4	0	0	1	0	0	0	0	0	0	0	0	CYTOSOL
Q13111		0	1	0	0	0	0	0	0	0	0	0	CHROMATIN
Q13123	IK	0	0	0	0	0	0	0	0.505932	0.494068	0	0	NUCLEOLUS
Q13129	RLF	0	1	0	0	0	0	0	0	0	0	0	CHROMATIN
Q13131-2	PRKAA1	0	0	0.850213	0	0	0	0	0	0	0	0.149787	CYTOSOL
Q13136	PPFIA1	0	0	0	0	0.457227	0	0	0	0	0	0.542773	PLASMA MEMBRANE
Q13137-4	CALCOCO2	0	0	0.519355	0	0	0	0	0	0	0	0.480645	CYTOSOL
Q13144	EIF2B5	0	0	1	0	0	0	0	0	0	0	0	CYTOSOL
Q13148	TARDBP	0	0.220512	0.262415	0	0	0	0	0	0.517074	0	0	NUCLEUS
Q13151	HNRNPA0	0	0.394086	0	0	0	0	0	0.279194	0.32672	0	0	CHROMATIN
Q13155	AIMP2	0	0	0.7372	0	0	0	0	0	0.2628	0	0	CYTOSOL
Q13162	PRDX4	0.20934	0	0	0.536857	0	0.253802	0	0	0	0	0	ENDOPLASMIC RETICULUM
Q13177	PAK2	0	0	1	0	0	0	0	0	0	0	0	CYTOSOL
Q13185	CBX3	0	0	0.201912	0	0	0	0	0	0.798088	0	0	NUCLEUS
Q13190	STX5	0	0	0	0.294293	0.430935	0.274772	0	0	0	0	0	GOLGI APPARATUS
Q13200	PSMD2	0	0	0.702865	0	0	0	0	0	0.297135	0	0	CYTOSOL
Q13206	DDX10	0	0	0	0	0	0	0	1	0	0	0	NUCLEOLUS
Q13217	DNAJC3	0.368518	0	0	0.631482	0	0	0	0	0	0	0	ENDOPLASMIC RETICULUM
Q13232	NME3	0.643819	0	0	0.356181	0	0	0	0	0	0	0	40S/60S RIBOSOME
Q13233		0	0	0	0	0.310743	0	0	0	0	0	0.689257	PLASMA MEMBRANE
Q13242	SRSF9	0	0	0.169581	0	0	0	0	0	0.830419	0	0	NUCLEUS
Q13243	SRSF5	0	0	0.194212	0	0	0	0	0	0.805788	0	0	NUCLEUS
Q13247	SRSF6	0	0	0.139763	0	0	0	0	0	0.860237	0	0	NUCLEUS
Q13263	TRIM28	0	0	0	0	0	0	0	0	1	0	0	NUCLEUS
Q13277	STX3	0	0	0	0	0	0.3593	0	0	0	0	0.6407	PLASMA MEMBRANE
Q13283	G3BP1	0	1	0	0	0	0	0	0	0	0	0	CHROMATIN
Q13287	NMI	0	0	0.474043	0	0	0	0	0	0.525957	0	0	NUCLEUS
Q13310-3	PABPC4	0	0	0.349255	0	0	0	0	0	0.650745	0	0	NUCLEUS
Q13315	ATM	0	1	0	0	0	0	0	0	0	0	0	CHROMATIN
Q13347	EIF3I	0	0	0.54556	0	0	0	0	0	0.45444	0	0	CYTOSOL
Q13362-4		0	0	0.486098	0	0	0	0	0	0	0	0.513902	PLASMA MEMBRANE
Q13370	PDE3B	0	0	0	0.5602	0.210913	0.228887	0	0	0	0	0	ENDOPLASMIC RETICULUM
Q13393	PLD1	0	0	0	0	0	0.565464	0	0	0	0	0.434536	LYSOSOME
Q13405	MRPL49	0	0	0	0	0	0	1	0	0	0	0	MITOCHONDRIA
Q13409-3		0	0.65225	0	0	0	0	0	0	0.34775	0	0	CHROMATIN
Q13418	ILK	0	0	0	0	0.335873	0	0	0	0	0	0.664127	PLASMA MEMBRANE
Q13423	NNT	0	0	0	0	0	0	1	0	0	0	0	MITOCHONDRIA
Q13425	SNTB2	0	0	0	0	0	0.330736	0	0	0	0	0.669264	PLASMA MEMBRANE
Q13427	PPIG	0	0.40613	0	0	0	0	0	0.23441	0.35946	0	0	CHROMATIN
Q13428-4	TCOF1	0.438564	0	0	0	0.561436	0	0	0	0	0	0	GOLGI APPARATUS
Q13433		0	0	0	0	0	0	0	0	0	0	1	PLASMA MEMBRANE
Q13435	SF3B2	0	0	0	0	0	0	0	0.251363	0.748637	0	0	NUCLEUS
Q13442	PDAP1	0.377319	0	0.622681	0	0	0	0	0	0	0	0	CYTOSOL
Q13443	ADAM9	0	0	0	0	0	0	0	0	0	0	1	PLASMA MEMBRANE
Q13444		0	0	0	0	0.343879	0	0	0	0	0	0.65612	PLASMA MEMBRANE
Q13451	FKBP5	0	0	0.716481	0	0	0	0	0	0.283519	0	0	CYTOSOL
Q13459	MYO9B	0	0.354975	0	0	0	0	0	0	0	0	0.645025	PLASMA MEMBRANE
Q13464	ROCK1	0	0	0.129952	0	0	0	0	0	0	0	0.870048	PLASMA MEMBRANE
Q13472		0	0.339966	0	0	0	0	0.385134	0	0	0.2749	0	MITOCHONDRIA
Q13488	TCIRG1	0	0	0	0	0	0.876355	0	0	0	0	0.123645	LYSOSOME
Q13492	PICALM	0.310846	0	0	0	0.689154	0	0	0	0	0	0	GOLGI APPARATUS
Q13496	MTM1	0	0	0.15677	0	0.318095	0	0	0	0	0	0.525135	PLASMA MEMBRANE
Q13501	SQSTM1	0	0	0.492743	0	0	0	0	0	0	0	0.507257	PLASMA MEMBRANE
Q13505	MTX1	0	0	0	0	0	0	1	0	0	0	0	MITOCHONDRIA
Q13510-2	ASAH1	0	0	0	0	0.197307	0.676671	0	0	0	0	0.126022	LYSOSOME
Q13526	PIN1	0	0	0.455286	0	0	0	0	0	0.306101	0	0.238613	CYTOSOL
Q13547	HDAC1	0	0.230968	0.211671	0	0	0	0	0	0.557361	0	0	NUCLEUS
Q13557-8	CAMK2D	0	0.448681	0	0	0	0	0	0	0.551319	0	0	NUCLEUS
Q13561-2	DCTN2	0	0	1	0	0	0	0	0	0	0	0	CYTOSOL
Q13563	PKD2	0	0	0	0.2133	0.309536	0	0	0	0	0	0.477164	PLASMA MEMBRANE
Q13568		0	1	0	0	0	0	0	0	0	0	0	CHROMATIN
Q13573	SNW1	0	0	0	0	0	0	0	0.632366	0.367634	0	0	NUCLEOLUS
Q13576		0	0	0.42962	0	0	0	0	0	0	0	0.57038	PLASMA MEMBRANE
Q13586	STIM1	0.260216	0	0	0.518846	0	0	0	0	0	0.220937	0	ENDOPLASMIC RETICULUM
Q13596	SNX1	0	0	1	0	0	0	0	0	0	0	0	CYTOSOL
Q13601	KRR1	0	0	0	0	0	0	0	0.548069	0.451931	0	0	NUCLEOLUS
Q13616	CUL1	0	0	0.401887	0	0	0	0	0	0.598113	0	0	NUCLEUS
Q13617-2	CUL2	0	0	0.697153	0	0	0	0	0	0.302847	0	0	CYTOSOL
Q13618	CUL3	0	0	0.548106	0	0	0	0	0	0.451894	0	0	CYTOSOL
Q13619	CUL4A	0	0	0.477426	0	0	0	0	0	0.522574	0	0	NUCLEUS
Q13620		0	0	0.383065	0	0	0	0	0	0.616936	0	0	NUCLEUS
Q13627-2	DYRK1A	0.178703	0	0	0	0.247111	0	0	0.332594	0	0	0.241592	NUCLEOLUS
Q13630	TSTA3	0	0	1	0	0	0	0	0	0	0	0	CYTOSOL
Q13636	RAB31	0	0	0	0.350294	0.649706	0	0	0	0	0	0	GOLGI APPARATUS
Q13637	RAB32	0	0	0.387334	0.283168	0.329498	0	0	0	0	0	0	CYTOSOL
Q13641	TPBG	0	0	0	0	0	0	0	0	0	0	1	PLASMA MEMBRANE
Q13671	RIN1	0	0	0.674585	0	0	0	0	0	0	0	0.325415	CYTOSOL
Q13683		0	0	0	0	0	0	0	0	0	0	1	PLASMA MEMBRANE
Q13724	MOGS	0	0	0	0.753134	0	0	0	0	0	0.246866	0	ENDOPLASMIC RETICULUM
Q13740-2	ALCAM	0	0	0	0	0	0	0	0	0	0	1	PLASMA MEMBRANE
Q13769	THOC5	0	0.354994	0	0	0	0	0	0.364682	0.280324	0	0	NUCLEOLUS
Q13823	GNL2	0.211067	0	0	0	0	0	0	0.501857	0.287075	0	0	NUCLEOLUS
Q13838-2	DDX39B	0	0	0.109908	0	0	0	0	0.270384	0.619709	0	0	NUCLEUS
Q13868		0	0	0.166123	0	0	0	0	0	0.833877	0	0	NUCLEUS
Q13884	SNTB1	0	0	0	0	0	0.269961	0	0	0	0	0.730039	PLASMA MEMBRANE
Q13895	BYSL	0	0	0.137033	0	0	0	0	0.862967	0	0	0	NUCLEOLUS
Q13905-3		0	0	0.299996	0	0	0	0	0	0	0	0.700004	PLASMA MEMBRANE
Q13907	IDI1	0	0	0.683057	0	0	0	0	0	0.316943	0	0	CYTOSOL
Q13948		0	0	0	0.372968	0.627032	0	0	0	0	0	0	GOLGI APPARATUS
Q13951		0	0	0.403972	0	0	0	0	0	0.596028	0	0	NUCLEUS
Q14005		0	0	0.133977	0	0	0	0	0	0	0	0.866023	PLASMA MEMBRANE
Q14008-3	CKAP5	0	1	0	0	0	0	0	0	0	0	0	CHROMATIN
Q14011	CIRBP	0	0	0	0	0	0	0	0	1	0	0	NUCLEUS
Q14019	COTL1	0	0	1	0	0	0	0	0	0	0	0	CYTOSOL
Q14055	COL9A2	0	0.520347	0	0	0	0	0	0	0.479653	0	0	CHROMATIN
Q14088	RAB33A	0	0	0	0	0.594997	0.405003	0	0	0	0	0	GOLGI APPARATUS
Q14108	SCARB2	0	0	0	0	0	1	0	0	0	0	0	LYSOSOME
Q14118	DAG1	0	0	0	0	0	0.281013	0	0	0	0	0.718987	PLASMA MEMBRANE
Q14126	DSG2	0	0	0	0	0	0	0	0	0	0	1	PLASMA MEMBRANE
Q14135-4		0.274789	0	0.338816	0	0	0	0	0	0.386396	0	0	NUCLEUS
Q14137	BOP1.00	0	0	0	0	0	0	0	0.715938	0.284062	0	0	NUCLEOLUS
Q14139-2	UBE4A	0	0	0.681237	0	0	0	0	0	0.318763	0	0	CYTOSOL
Q14141	2006-09-01	0.25035	0.434395	0	0	0.315256	0	0	0	0	0	0	CHROMATIN
Q14145		0	0	0.83092	0	0	0	0	0	0	0	0.16908	CYTOSOL
Q14149	MORC3	0	1	0	0	0	0	0	0	0	0	0	CHROMATIN
Q14152	EIF3A	0	0	0.555872	0	0	0	0	0	0.444128	0	0	CYTOSOL
Q14155-5	ARHGEF7	0	0	0.365793	0	0	0	0	0	0.408825	0	0.225381	NUCLEUS
Q14156	EFR3A	0	0	0	0	0	0	0	0	0	0	1	PLASMA MEMBRANE
Q14157-5	UBAP2L	0	0.502693	0	0	0	0	0	0.497307	0	0	0	CHROMATIN
Q14161	GIT2	0	0	0.512999	0	0	0	0	0	0.487001	0	0	CYTOSOL
Q14165	MLEC	0	0	0	0.821513	0	0	0.178487	0	0	0	0	ENDOPLASMIC RETICULUM
Q14166	TTLL12	0	0	1	0	0	0	0	0	0	0	0	CYTOSOL
Q14168-4	MPP2	0	0	0	0	0	0	0	0	0	0	1	PLASMA MEMBRANE
Q14192	FHL2	0	0	0.360698	0	0	0	0	0	0.341576	0	0.297727	CYTOSOL
Q14197	MRPL58	0	0	0	0	0	0	1	0	0	0	0	MITOCHONDRIA
Q14203	DCTN1	0	0	1	0	0	0	0	0	0	0	0	CYTOSOL
Q14204	DYNC1H1	0	0.68211	0	0	0	0	0	0	0.31789	0	0	CHROMATIN
Q14240-2	EIF4A2	0	0	0.399166	0	0	0	0	0	0.600834	0	0	NUCLEUS
Q14241	TCEB3	0.234505	0.765495	0	0	0	0	0	0	0	0	0	CHROMATIN
Q14249	ENDOG	0.269485	0	0	0	0	0	0.730515	0	0	0	0	MITOCHONDRIA
Q14254	FLOT2	0	0	0	0	0	0.233463	0	0	0	0	0.766537	PLASMA MEMBRANE
Q14257-2	RCN2	0.148961	0	0	0.412286	0.215877	0.222876	0	0	0	0	0	ENDOPLASMIC RETICULUM
Q14258	TRIM25	1	0	0	0	0	0	0	0	0	0	0	40S/60S RIBOSOME
Q14289-2	PTK2B	0	0	0.676465	0	0	0	0	0	0	0	0.323535	CYTOSOL
Q14331	FRG1	0	0.544577	0	0	0	0	0	0	0.455423	0	0	CHROMATIN
Q14344	GNA13	0	0	0	0	0	0	0	0	0	0	1	PLASMA MEMBRANE
Q14376		0	0	1	0	0	0	0	0	0	0	0	CYTOSOL
Q14393	GAS6	0.136189	0	0	0.480601	0.185729	0.19748	0	0	0	0	0	ENDOPLASMIC RETICULUM
Q14444	CAPRIN1	0	0.273134	0	0	0	0	0	0.416688	0.310178	0	0	NUCLEOLUS
Q14493	SLBP	0	0	0.386994	0	0	0	0	0	0.457139	0	0.155866	NUCLEUS
Q14498	RBM39	0.228181	0	0	0	0	0	0	0	0.771819	0	0	NUCLEUS
Q14517	FAT1	0	0	0	0.239086	0.337695	0	0	0	0	0	0.423219	PLASMA MEMBRANE
Q14554	PDIA5	0.288197	0	0	0.525267	0	0	0.186536	0	0	0	0	ENDOPLASMIC RETICULUM
Q14566	MCM6	0	0	0.374215	0	0	0	0	0	0.625785	0	0	NUCLEUS
Q14573	ITPR3	0	0	0	0.422258	0.334668	0.243075	0	0	0	0	0	ENDOPLASMIC RETICULUM
Q14644		0	0	0	0	0	0	0	0	0	0	1	PLASMA MEMBRANE
Q14667	KIAA0100	0.147991	0	0	0.426032	0.225186	0.200792	0	0	0	0	0	ENDOPLASMIC RETICULUM
Q14677	CLINT1	0	0.62698	0	0	0.37302	0	0	0	0	0	0	CHROMATIN
Q14683	SMC1A	0	1	0	0	0	0	0	0	0	0	0	CHROMATIN
Q14689		0	0	0	0	0	0	0	0	0	0	1	PLASMA MEMBRANE
Q14690	PDCD11	0	0	0	0	0	0	0	1	0	0	0	NUCLEOLUS
Q14692		0	0	0	0	0	0	0	1	0	0	0	NUCLEOLUS
Q14694-2	USP10	0.192655	0	0	0	0	0	0	0.353557	0.453788	0	0	NUCLEUS
Q14696	MESDC2	0.387692	0	0	0.372259	0	0.240049	0	0	0	0	0	40S/60S RIBOSOME
Q14697-2		0.268002	0	0	0.490999	0	0.240999	0	0	0	0	0	ENDOPLASMIC RETICULUM
Q14699	RFTN1	0	0	0	0	0	0	0	0	0	0	1	PLASMA MEMBRANE
Q14738		0	0	1	0	0	0	0	0	0	0	0	CYTOSOL
Q14739	LBR	0	0	0	0.70114	0	0	0	0	0	0.29886	0	ENDOPLASMIC RETICULUM
Q14746		0	0	1	0	0	0	0	0	0	0	0	CYTOSOL
Q14764	MVP	0	0	0	0	0	0	0	0.754006	0	0	0.245994	NUCLEOLUS
Q14814-4	MEF2D	0	1	0	0	0	0	0	0	0	0	0	CHROMATIN
Q14839-2	CHD4	0	0.743506	0	0	0	0	0	0	0.256494	0	0	CHROMATIN
Q14847	LASP1	0	0	0.481382	0	0	0	0	0	0	0	0.518618	PLASMA MEMBRANE
Q14914	PTGR1	0	0	1	0	0	0	0	0	0	0	0	CYTOSOL
Q14956	GPNMB	0	0	0	0	0.372713	0.328184	0	0	0	0	0.299102	GOLGI APPARATUS
Q14966	ZNF638	0	1	0	0	0	0	0	0	0	0	0	CHROMATIN
Q14974	KPNB1	0	0	1	0	0	0	0	0	0	0	0	CYTOSOL
Q14BN4	SLMAP	0	0	0	0.744363	0.255637	0	0	0	0	0	0	ENDOPLASMIC RETICULUM
Q14C86-6	GAPVD1	0	0	1	0	0	0	0	0	0	0	0	CYTOSOL
Q15003	NCAPH	0	1	0	0	0	0	0	0	0	0	0	CHROMATIN
Q15004		0.284235	0.396733	0	0	0	0	0	0	0.319032	0	0	CHROMATIN
Q15005	SPCS2	0	0	0	1	0	0	0	0	0	0	0	ENDOPLASMIC RETICULUM
Q15006	EMC2	0.317428	0	0	0.445769	0	0	0	0	0	0.236803	0	ENDOPLASMIC RETICULUM
Q15007	WTAP	0	0	0	0	0	0	0	0.472914	0.527086	0	0	NUCLEUS
Q15008	PSMD6	0	0	0.741709	0	0	0	0	0	0.258291	0	0	CYTOSOL
Q15011	HERPUD1	0	0	0	1	0	0	0	0	0	0	0	ENDOPLASMIC RETICULUM
Q15014		0.261333	0.738667	0	0	0	0	0	0	0	0	0	CHROMATIN
Q15018	FAM175B	0	0	0.82434	0	0	0	0	0	0	0	0.17566	CYTOSOL
Q15019		0.222136	0.373441	0	0	0.404423	0	0	0	0	0	0	GOLGI APPARATUS
Q15020		0	0	0.660569	0	0	0	0	0	0.339431	0	0	CYTOSOL
Q15021	NCAPD2	0	1	0	0	0	0	0	0	0	0	0	CHROMATIN
Q15022	SUZ12	0	1	0	0	0	0	0	0	0	0	0	CHROMATIN
Q15024	EXOSC7	0	0	0.21549	0	0	0	0	0	0.78451	0	0	NUCLEUS
Q15029	EFTUD2	0	0	0	0	0	0	0	0.268772	0.731228	0	0	NUCLEUS
Q15031	LARS2	0	0	0	0	0	0	1	0	0	0	0	MITOCHONDRIA
Q15032-3		0	0	0.247182	0	0	0	0	0	0.41685	0	0.335968	NUCLEUS
Q15035	TRAM2	0	0	0	0.45474	0	0.262765	0	0	0	0.282496	0	ENDOPLASMIC RETICULUM
Q15036		0	0	0.640688	0	0	0	0	0	0	0	0.359312	CYTOSOL
Q15042	RAB3GAP1	0	0	1	0	0	0	0	0	0	0	0	CYTOSOL
Q15043	SLC39A14	0	0	0	0	0	0.264948	0	0	0	0	0.735052	PLASMA MEMBRANE
Q15046-2	KARS	0	0	0.699889	0	0	0	0	0	0.300111	0	0	CYTOSOL
Q15047		0	0	0.464436	0	0	0	0	0	0.535564	0	0	NUCLEUS
Q15050	RRS1	0	0	0	0	0	0	0	1	0	0	0	NUCLEOLUS
Q15052	ARHGEF6	0	0	0.607741	0	0	0	0	0	0.392259	0	0	CYTOSOL
Q15056-2		0	0	1	0	0	0	0	0	0	0	0	CYTOSOL
Q15057	ACAP2	0	0	0.376891	0	0.246337	0.232226	0	0	0	0	0.144546	CYTOSOL
Q15059	BRD3	0	1	0	0	0	0	0	0	0	0	0	CHROMATIN
Q15061	WDR43	0	0	0	0	0	0	0	1	0	0	0	NUCLEOLUS
Q15067-2	ACOX1	0	0	0	0	0	0	0	0	0	1	0	PEROXISOME
Q15070	OXA1L	0	0	0	0	0	0	1	0	0	0	0	MITOCHONDRIA
Q15075	EEA1	0	0	0.731435	0	0	0	0	0	0.268565	0	0	CYTOSOL
Q15080	NCF4	0	0	0.726543	0	0	0	0	0	0.273457	0	0	CYTOSOL
Q15084-2	PDIA6	0.165494	0	0	0.532415	0	0.302091	0	0	0	0	0	ENDOPLASMIC RETICULUM
Q15102	PAFAH1B3	0	0	1	0	0	0	0	0	0	0	0	CYTOSOL
Q15118	PDK1	0	0	0	0	0	0	0.781312	0	0	0.218688	0	MITOCHONDRIA
Q15120-2	PDK3	0	0	0	0	0	0	1	0	0	0	0	MITOCHONDRIA
Q15126		0	0	0.757003	0	0	0	0	0	0.242997	0	0	CYTOSOL
Q15149		0.336268	0	0	0	0	0	0	0.365276	0.298456	0	0	NUCLEOLUS
Q15154	PCM1	0	0.32363	0	0	0	0	0	0.67637	0	0	0	NUCLEOLUS
Q15165	PON2	0	0	0	0.747367	0	0	0.252633	0	0	0	0	ENDOPLASMIC RETICULUM
Q15181	PPA1	0	0	1	0	0	0	0	0	0	0	0	CYTOSOL
Q15185	PTGES3	0	0	1	0	0	0	0	0	0	0	0	CYTOSOL
Q15233	NONO	0	0.347276	0	0	0	0	0	0.34667	0.306053	0	0	CHROMATIN
Q15262-3	PTPRK	0	0	0	0	0	0	0	0	0	0	1	PLASMA MEMBRANE
Q15274	QPRT	0	0	1	0	0	0	0	0	0	0	0	CYTOSOL
Q15286	RAB35	0	0	0	0	0	0.250606	0	0	0	0	0.749394	PLASMA MEMBRANE
Q15287	RNPS1	0	0	0	0	0	0	0	0.295961	0.704039	0	0	NUCLEUS
Q15291		0	0	0.358238	0	0	0	0	0	0.641762	0	0	NUCLEUS
Q15293	RCN1	0.275892	0	0	0.503599	0	0.220509	0	0	0	0	0	ENDOPLASMIC RETICULUM
Q15311	RALBP1	0	0	0.244035	0	0	0.272699	0	0	0	0	0.483266	PLASMA MEMBRANE
Q15334		0	0	0	0	0	0	0	0	0	0	1	PLASMA MEMBRANE
Q15363	TMED2	0	0	0	0.426311	0.281295	0	0.103128	0	0	0.189266	0	ENDOPLASMIC RETICULUM
Q15365	PCBP1	0	0	0.483621	0	0	0	0	0	0.516379	0	0	NUCLEUS
Q15369	TCEB1	0	0	0.730306	0	0	0	0	0	0.269694	0	0	CYTOSOL
Q15382	RHEB	0	0	1	0	0	0	0	0	0	0	0	CYTOSOL
Q15392	DHCR24	0.179894	0	0	0.538381	0.281725	0	0	0	0	0	0	ENDOPLASMIC RETICULUM
Q15393	SF3B3	0	0	0.158135	0	0	0	0	0	0.841865	0	0	NUCLEUS
Q15397	PUM3	0	0.245676	0	0	0	0	0	0.362349	0.391976	0	0	NUCLEUS
Q15404	RSU1	0	0	1	0	0	0	0	0	0	0	0	CYTOSOL
Q15418-2	RPS6KA1	0	0	0.515208	0	0	0	0	0	0.484792	0	0	CYTOSOL
Q15424-3	SAFB	0	0	0	0	0	0	0	0.776363	0.223637	0	0	NUCLEOLUS
Q15428	SF3A2	0	0	0	0	0	0	0	0	1	0	0	NUCLEUS
Q15435	PPP1R7	0	0	1	0	0	0	0	0	0	0	0	CYTOSOL
Q15436	SEC23A	0	0	0	0	0.749499	0.250501	0	0	0	0	0	GOLGI APPARATUS
Q15437	SEC23B	0.314122	0	0.210621	0	0.475257	0	0	0	0	0	0	GOLGI APPARATUS
Q15459	SF3A1	0	0	0.167268	0	0	0	0	0	0.832732	0	0	NUCLEUS
Q15477	SKIV2L	0.273381	0	0	0	0	0	0	0.403422	0.323197	0	0	NUCLEOLUS
Q15528	MED22	0	0.429645	0	0	0	0	0	0	0.570355	0	0	NUCLEUS
Q15582	TGFBI	0	0	0	0	0.424662	0.390783	0	0	0	0	0.184555	GOLGI APPARATUS
Q15596		0	0	0.541248	0	0	0	0	0	0.458752	0	0	CYTOSOL
Q15599	SLC9A3R2	0	0	0	0	0	0	0	0	0	0	1	PLASMA MEMBRANE
Q15629	TRAM1	0	0	0	0.644707	0	0.355293	0	0	0	0	0	ENDOPLASMIC RETICULUM
Q15642	TRIP10	0	0	0.717746	0	0	0	0	0	0	0	0.282254	CYTOSOL
Q15650	TRIP4	0.219036	0	0	0	0	0	0	0	0.780964	0	0	NUCLEUS
Q15652	JMJD1C	0	1	0	0	0	0	0	0	0	0	0	CHROMATIN
Q15654	TRIP6	0	0	0.577876	0	0	0	0	0	0	0	0.422124	CYTOSOL
Q15691	MAPRE1	0	0	1	0	0	0	0	0	0	0	0	CYTOSOL
Q15717-2	ELAVL1	0	0.298492	0.307646	0	0	0	0	0	0.393862	0	0	NUCLEUS
Q15738	NSDHL	0	0	0	1	0	0	0	0	0	0	0	ENDOPLASMIC RETICULUM
Q15750		0	0	0.680353	0	0	0	0	0	0	0	0.319647	CYTOSOL
Q15758	SLC1A5	0	0	0	0	0	0	0	0	0	0	1	PLASMA MEMBRANE
Q15785	TOMM34	0	0.38454	0.28116	0	0	0	0	0	0.334299	0	0	CHROMATIN
Q15811		0.247131	0	0	0	0.354795	0	0	0	0	0	0.398073	PLASMA MEMBRANE
Q15813		0	0	1	0	0	0	0	0	0	0	0	CYTOSOL
Q15818	NPTX1	0	0	0	0.330348	0.201226	0.468426	0	0	0	0	0	LYSOSOME
Q15819		0	0	1	0	0	0	0	0	0	0	0	CYTOSOL
Q15831		0	0	0.750497	0	0	0	0	0	0	0	0.249503	CYTOSOL
Q15833	STXBP2	0	0	0.712578	0	0	0	0	0	0	0	0.287422	CYTOSOL
Q15836	VAMP3	0	0	0	0	0	0.187714	0	0	0	0	0.812286	PLASMA MEMBRANE
Q15843	NEDD8	0	0	0.33392	0	0	0	0	0	0.322301	0	0.343779	PLASMA MEMBRANE
Q15904	ATP6AP1	0	0	0	0.317936	0.277307	0.404758	0	0	0	0	0	LYSOSOME
Q15910-2	EZH2	0	0.715176	0	0	0	0	0	0	0.284824	0	0	CHROMATIN
Q15942	ZYX	0	0	0.349841	0	0	0	0	0	0	0	0.650159	PLASMA MEMBRANE
Q16134	ETFDH	0	0	0	0	0	0	1	0	0	0	0	MITOCHONDRIA
Q16186	ADRM1	0	0	0.850173	0	0	0	0	0	0	0	0.149827	CYTOSOL
Q16204		0	0	1	0	0	0	0	0	0	0	0	CYTOSOL
Q16254		0	0.355245	0.320314	0	0	0	0	0	0.324441	0	0	CHROMATIN
[truncated: 1,883 more rows]

## Sheet: CCMPS_static_LPS
Accession/UniprotID	Genes	CC_Ribosome	CC_Chromatin	CC_Cytosol	CC_ER	CC_Golgi	CC_Lysosome	CC_Mitochondria	CC_Nucleolus	CC_Nucleus	CC_Peroxisome	CC_PM	MainCompartment
A0A0B4J2F0		0	0.233893	0	0	0.402994	0	0.363114	0	0	0	0	GOLGI APPARATUS
A0AVT1	UBA6	0	0	1	0	0	0	0	0	0	0	0	CYTOSOL
A0FGR8-2	ESYT2	0	0	0	0.39566	0.238431	0.365909	0	0	0	0	0	ENDOPLASMIC RETICULUM
A0JNW5	UHRF1BP1L	0	0	0.550836	0	0	0	0	0	0	0	0.449164	CYTOSOL
A0MZ66-3	SHTN1	0	0	1	0	0	0	0	0	0	0	0	CYTOSOL
A0PJW6		0	0	0	0	0	0	0.704526	0	0	0.295474	0	MITOCHONDRIA
A1L0T0	ILVBL	0	0	0	0.624605	0.375395	0	0	0	0	0	0	ENDOPLASMIC RETICULUM
A2A288		0.407028	0.291888	0	0	0	0	0	0	0	0	0.301084	40S/60S RIBOSOME
A2RRP1	NBAS	0	0	0	0.479307	0.247249	0.273444	0	0	0	0	0	ENDOPLASMIC RETICULUM
A2RUS2	DENND3	0.309785	0.231651	0.0724677	0	0	0	0	0	0.386096	0	0	NUCLEUS
A2VDJ0-5	KIAA0922	0	0	0	0.601615	0.398385	0	0	0	0	0	0	ENDOPLASMIC RETICULUM
A3KMH1	VWA8	0	0	0	0	0	0	1	0	0	0	0	MITOCHONDRIA
A4D1E9	GTPBP10	0	0	0	0	0	0	1	0	0	0	0	MITOCHONDRIA
A4D1P6	WDR91	0	0	0.771472	0	0	0	0	0	0	0	0.228528	CYTOSOL
A4D1S0		0	0	0.0436792	0	0	0	0	0	0	0	0.956321	PLASMA MEMBRANE
A5D8V6		0	0	0.0521779	0	0	0	0	0	0	0	0.947822	PLASMA MEMBRANE
A5PLL7		0	0	0	0.602034	0.397966	0	0	0	0	0	0	ENDOPLASMIC RETICULUM
A5PLN9-5		0	0	0.108352	0	0.357728	0	0	0	0	0	0.53392	PLASMA MEMBRANE
A5YKK6	CNOT1	1	0	0	0	0	0	0	0	0	0	0	40S/60S RIBOSOME
A6NC98	CCDC88B	0	0	0.818997	0	0	0	0	0	0	0	0.181003	CYTOSOL
A6NDG6	PGP	0	0	0.906569	0	0	0	0	0	0	0	0.093431	CYTOSOL
A6NEE1		0	0	0	0.358306	0	0.641694	0	0	0	0	0	LYSOSOME
A6NHR9	SMCHD1	0	1	0	0	0	0	0	0	0	0	0	CHROMATIN
A6NJ78	METTL15	0	0	0	0	0	0	0.626898	0	0	0.373102	0	MITOCHONDRIA
A8MVS5	HIDE1	0	0	0	0	0	0	0	0	0	0	1	PLASMA MEMBRANE
A8MXV4	NUDT19	0	0	0	0	0	0	0.629556	0	0	0.370444	0	MITOCHONDRIA
B0I1T2	MYO1G	0	0	0	0	0	0	0	0	0	0	1	PLASMA MEMBRANE
B2RUZ4		0	0	0	0	0	0	0	0	0	0	1	PLASMA MEMBRANE
C9J798		0.307172	0	0.179046	0	0	0	0	0	0	0	0.513782	PLASMA MEMBRANE
C9JLW8	MCRIP1	0.553752	0	0	0	0	0	0	0	0.446248	0	0	40S/60S RIBOSOME
O00115	DNASE2	0	0	0	0	0	0.60488	0	0	0	0	0.39512	LYSOSOME
O00116	AGPS	0	0	0	0	0	0	0.414782	0	0	0.585218	0	PEROXISOME
O00142	TK2	0	0	0	0	0	0	1	0	0	0	0	MITOCHONDRIA
O00148	DDX39A	0	0	0.114674	0	0	0	0	0	0.885326	0	0	NUCLEUS
O00151	PDLIM1	0	0	0.39332	0	0	0	0	0	0	0	0.60668	PLASMA MEMBRANE
O00154		0	0	1	0	0	0	0	0	0	0	0	CYTOSOL
O00159-3	MYO1C	0	0	0	0	0	0	0	0	0	0	1	PLASMA MEMBRANE
O00160	MYO1F	0	0	1	0	0	0	0	0	0	0	0	CYTOSOL
O00161	SNAP23	0	0	0	0	0	0	0	0	0	0	1	PLASMA MEMBRANE
O00165-2	HAX1	0	0	0	0	0	0	1	0	0	0	0	MITOCHONDRIA
O00170	AIP	0	0	1	0	0	0	0	0	0	0	0	CYTOSOL
O00178	GTPBP1	0.200168	0.240312	0	0	0	0	0	0	0.55952	0	0	NUCLEUS
O00182	LGALS9	0	0	0	0	0	0	0	0	0	0	1	PLASMA MEMBRANE
O00186	STXBP3	0	0	0	0	0	0.562773	0	0	0	0	0.437227	LYSOSOME
O00193	SMAP	0	0	1	0	0	0	0	0	0	0	0	CYTOSOL
O00203	AP3B1	0	0	0.796585	0	0	0	0	0	0.203415	0	0	CYTOSOL
O00214-2	LGALS8	0	0	0	0	0	0	0	0	0	0	1	PLASMA MEMBRANE
O00217	NDUFS8	0	0.254473	0	0	0	0	0.456772	0	0	0.288755	0	MITOCHONDRIA
O00231-2	PSMD11	0	0	0.648974	0	0	0	0	0	0.351025	0	0	CYTOSOL
O00232	PSMD12	0	0	0.652044	0	0	0	0	0	0.347957	0	0	CYTOSOL
O00233		0	0	1	0	0	0	0	0	0	0	0	CYTOSOL
O00241	SIRPB1	0	0	0	0	0	0	0	0	0	0	1	PLASMA MEMBRANE
O00264	PGRMC1	0.207032	0	0	0.434008	0.35896	0	0	0	0	0	0	ENDOPLASMIC RETICULUM
O00268		0.254115	0.745885	0	0	0	0	0	0	0	0	0	CHROMATIN
O00291	HIP1	0	0	0	0	0	0.467057	0	0	0	0	0.532942	PLASMA MEMBRANE
O00299	CLIC1	0	0	1	0	0	0	0	0	0	0	0	CYTOSOL
O00303	EIF3F	0	0	0.259678	0	0	0	0	0	0.740322	0	0	NUCLEUS
O00308	WWP2	0	0	0	0	0	0	0	0	0	0	1	PLASMA MEMBRANE
O00329	PIK3CD	0.243389	0.286412	0.0758586	0	0	0	0	0	0.39434	0	0	NUCLEUS
O00330	PDHX	0	0	0	0	0	0	1	0	0	0	0	MITOCHONDRIA
O00391	QSOX1	0	0	0	0	0.42854	0.428502	0	0	0	0	0.142958	GOLGI APPARATUS
O00400	SLC33A1	0	0	0	0.606251	0.393749	0	0	0	0	0	0	ENDOPLASMIC RETICULUM
O00410-3	IPO5	0	0	0.626024	0	0	0	0	0	0.373976	0	0	CYTOSOL
O00411	POLRMT	0	0	0	0	0	0	1	0	0	0	0	MITOCHONDRIA
O00422	SAP18	0	0	0	0	0	0	0	0.650222	0.349778	0	0	NUCLEOLUS
O00442-2	RTCA	0	0	0.632023	0	0	0	0	0	0.367977	0	0	CYTOSOL
O00443	PIK3C2A	0.239461	0	0	0	0.253163	0.333469	0	0	0	0	0.173907	LYSOSOME
O00453		0	0	0	0	0	0	0	0	0	0	1	PLASMA MEMBRANE
O00461	GOLIM4	0	0	0	0.584778	0.415222	0	0	0	0	0	0	ENDOPLASMIC RETICULUM
O00462		0	0	0	0.319205	0	0.680795	0	0	0	0	0	LYSOSOME
O00468	AGRN	0	0	0	0	0.510338	0.387743	0	0	0	0	0.10192	GOLGI APPARATUS
O00469-2		0	0	0	0.379444	0.307926	0.31263	0	0	0	0	0	ENDOPLASMIC RETICULUM
O00471	EXOC5	0	0	0	0	0.259873	0.573412	0	0	0	0	0.166715	LYSOSOME
O00479		0	1	0	0	0	0	0	0	0	0	0	CHROMATIN
O00483	NDUFA4	0	0	0	0	0	0	1	0	0	0	0	MITOCHONDRIA
O00487	PSMD14	0	0	0.610989	0	0	0	0	0	0.389011	0	0	CYTOSOL
O00522	KRIT1	0	0	0.0492746	0	0	0	0	0	0	0	0.950725	PLASMA MEMBRANE
O00541	PES1.00	0	0	0	0	0	0	0	0.611567	0.388433	0	0	NUCLEOLUS
O00559-2	EBAG9	0.253854	0	0	0	0.637554	0	0	0	0	0	0.108592	GOLGI APPARATUS
O00560		0	0	0	0	0	0.624321	0	0	0	0	0.375679	LYSOSOME
O00566	MPHOSPH10	0	0	0	0	0	0	0	0.734494	0.265506	0	0	NUCLEOLUS
O00567	NOP56	0	0	0	0	0	0	0	1	0	0	0	NUCLEOLUS
O00571	DDX3X	0.206788	0	0	0	0	0	0	0.410033	0.383179	0	0	NUCLEOLUS
O00584	RNASET2	0	0	0	0	0	0.831616	0	0	0	0	0.168384	LYSOSOME
O00743-3	PPP6C	0	0	1	0	0	0	0	0	0	0	0	CYTOSOL
O00746		0	0	0	0	0	0	0.681642	0	0	0.318358	0	MITOCHONDRIA
O00748	CES2	0	0	0	0.369026	0	0.501608	0	0	0	0	0.129366	LYSOSOME
O00754	MAN2B1	0	0	0	0	0	1	0	0	0	0	0	LYSOSOME
O00764	PDXK	0	0	1	0	0	0	0	0	0	0	0	CYTOSOL
O00767	SCD	0	0	0	0.605517	0.394483	0	0	0	0	0	0	ENDOPLASMIC RETICULUM
O14497	ARID1A	0	0.761866	0	0	0	0	0	0	0.238134	0	0	CHROMATIN
O14523	C2CD2L	0	0	0	0.330535	0.333873	0.335591	0	0	0	0	0	LYSOSOME
O14545	TRAFD1	0	0	1	0	0	0	0	0	0	0	0	CYTOSOL
O14548		0	0	0	0	0	0	1	0	0	0	0	MITOCHONDRIA
O14578-4	CIT	0.340147	0	0	0	0.401255	0	0	0	0	0	0.258598	GOLGI APPARATUS
O14579	COPE	0	0	0.680606	0	0	0	0	0	0.319394	0	0	CYTOSOL
O14602		0	0	0.560908	0	0	0	0	0	0.439092	0	0	CYTOSOL
O14617-5	AP3D1	0	0	0.797225	0	0	0	0	0	0.202775	0	0	CYTOSOL
O14647	CHD2	0	1	0	0	0	0	0	0	0	0	0	CHROMATIN
O14653-2	GOSR2	0	0	0	0.507967	0.492033	0	0	0	0	0	0	ENDOPLASMIC RETICULUM
O14656	TOR1A	0	0	0	0.457462	0.236281	0.306257	0	0	0	0	0	ENDOPLASMIC RETICULUM
O14657	TOR1B	0	0	0	0.559616	0	0.440384	0	0	0	0	0	ENDOPLASMIC RETICULUM
O14672	ADAM10	0	0	0	0	0	0	0	0	0	0	1	PLASMA MEMBRANE
O14681	EI24	0	0	0	0.513652	0.486348	0	0	0	0	0	0	ENDOPLASMIC RETICULUM
O14683	TP53I11	0	0	0	0	0.659532	0	0	0	0	0	0.340468	GOLGI APPARATUS
O14734	ACOT8	0	0	0	0	0	0	0.270739	0	0	0.729261	0	PEROXISOME
O14735	CDIPT	0	0	0	0.517372	0	0.482628	0	0	0	0	0	ENDOPLASMIC RETICULUM
O14737	PDCD5	0	0	1	0	0	0	0	0	0	0	0	CYTOSOL
O14744	PRMT5	0	0	1	0	0	0	0	0	0	0	0	CYTOSOL
O14745	SLC9A3R1	0	0	0.299842	0	0	0	0	0	0	0	0.700158	PLASMA MEMBRANE
O14773	TPP1	0	0	0	0	0	1	0	0	0	0	0	LYSOSOME
O14776	TCERG1	0.180221	0.269647	0	0	0	0	0	0.276583	0.190001	0	0.0835476	NUCLEOLUS
O14777	NDC80	0.21372	0.41648	0.0815028	0	0	0	0	0	0.288298	0	0	CHROMATIN
O14818	PSMA8	0	0	1	0	0	0	0	0	0	0	0	CYTOSOL
O14828		0	0	0	0	0	0.380949	0	0	0	0	0.619051	PLASMA MEMBRANE
O14832		0	0	0	0	0	0	0.375988	0	0	0.624012	0	PEROXISOME
O14841	OPLAH	0	0	1	0	0	0	0	0	0	0	0	CYTOSOL
O14874	BCKDK	0	0	0	0	0	0	0.700018	0	0	0.299982	0	MITOCHONDRIA
O14879	IFIT3	0	0	1	0	0	0	0	0	0	0	0	CYTOSOL
O14880	MGST3	0	0	0	0	0	0	0.718774	0	0	0.281226	0	MITOCHONDRIA
O14910	LIN7A	0	0	0	0	0	0.255287	0	0	0	0	0.744713	PLASMA MEMBRANE
O14920	IKBKB	0	0	0.554912	0	0	0	0	0	0.445088	0	0	CYTOSOL
O14925	TIMM23B	0	0	0	0	0	0	1	0	0	0	0	MITOCHONDRIA
O14929		0	0	0.580972	0	0	0	0	0	0.419028	0	0	CYTOSOL
O14949	UQCRQ	0	0	0	0	0	0	0.712419	0	0	0.287581	0	MITOCHONDRIA
O14950	MYL12B	0	0	1	0	0	0	0	0	0	0	0	CYTOSOL
O14964	HGS	0	0	0.556515	0	0	0	0	0	0	0	0.443485	CYTOSOL
O14966	RAB29	0	0	0	0.556066	0	0.443934	0	0	0	0	0	ENDOPLASMIC RETICULUM
O14967	CLGN	0	0	0	0.511142	0.488858	0	0	0	0	0	0	ENDOPLASMIC RETICULUM
O14972	DSCR3	0	0	0	0	0	0.683676	0	0	0	0	0.316324	LYSOSOME
O14975	SLC27A2	0	0	0	1	0	0	0	0	0	0	0	ENDOPLASMIC RETICULUM
O14976	GAK	0	0.215261	0.47191	0	0	0	0	0	0.31283	0	0	CYTOSOL
O14979		0	0	0.192175	0	0	0	0	0	0.807825	0	0	NUCLEUS
O14980	XPO1	0	0	0.81883	0	0	0	0	0	0.18117	0	0	CYTOSOL
O14994	SYN3	0.425273	0	0.308967	0	0	0	0	0	0	0	0.26576	40S/60S RIBOSOME
O15027-5	SEC16A	0.228176	0.237389	0.173716	0	0	0	0	0	0.360718	0	0	NUCLEUS
O15031	PLXNB2	0	0	0	0	0	0	0	0	0	0	1	PLASMA MEMBRANE
O15033		0	0	0	0	0.471726	0.346984	0	0	0	0	0.181291	GOLGI APPARATUS
O15067		0	0	1	0	0	0	0	0	0	0	0	CYTOSOL
O15091	KIAA0391	0	0	0	0	0	0	1	0	0	0	0	MITOCHONDRIA
O15118	NPC1	0	0	0	0	0	1	0	0	0	0	0	LYSOSOME
O15120	AGPAT2	0	0	0	0.666952	0.333048	0	0	0	0	0	0	ENDOPLASMIC RETICULUM
O15121	DEGS1	0	0	0	1	0	0	0	0	0	0	0	ENDOPLASMIC RETICULUM
O15126	SCAMP1	0	0	0	0	0	0.525891	0	0	0	0	0.474109	LYSOSOME
O15127	SCAMP2	0	0	0	0	0	0.276926	0	0	0	0	0.723074	PLASMA MEMBRANE
O15143	ARPC1B	0.44499	0	0.18525	0	0	0	0	0	0.36976	0	0	40S/60S RIBOSOME
O15144	ARPC2	0.2936	0	0.334867	0	0	0	0	0	0.371533	0	0	NUCLEUS
O15145	ARPC3	0.366559	0	0.13659	0	0	0	0	0	0	0	0.496851	PLASMA MEMBRANE
O15160	POLR1C	0	0.260706	0.187363	0	0	0	0	0	0.551931	0	0	NUCLEUS
O15173-2	PGRMC2	0	0	0	0.566467	0.433533	0	0	0	0	0	0	ENDOPLASMIC RETICULUM
O15226-2	NKRF	0	0	0	0	0	0	0	1	0	0	0	NUCLEOLUS
O15228	GNPAT	0	0	0	0	0	0	0.446622	0	0	0.553378	0	PEROXISOME
O15235		0	0	0	0	0	0	1	0	0	0	0	MITOCHONDRIA
O15254	ACOX3	0	0	0	0	0	0	0.344204	0	0	0.655796	0	PEROXISOME
O15258		0	0	0	1	0	0	0	0	0	0	0	ENDOPLASMIC RETICULUM
O15260	SURF4	0	0	0	0.435807	0.222666	0.341527	0	0	0	0	0	ENDOPLASMIC RETICULUM
O15269	SPTLC1	0	0	0	0.620117	0.379883	0	0	0	0	0	0	ENDOPLASMIC RETICULUM
O15270	SPTLC2	0	0	0	0.449251	0.268206	0.282542	0	0	0	0	0	ENDOPLASMIC RETICULUM
O15294	OGT	0	0	0.243504	0	0	0	0	0	0.756496	0	0	NUCLEUS
O15321	TM9SF1	0	0	0	0.353265	0.324617	0.322118	0	0	0	0	0	ENDOPLASMIC RETICULUM
O15347	HMGB3	0	1	0	0	0	0	0	0	0	0	0	CHROMATIN
O15355	PPM1G	0	0	0.797178	0	0	0	0	0	0.202822	0	0	CYTOSOL
O15357	INPPL1	0.19868	0	0.626554	0	0	0	0	0	0	0	0.174766	CYTOSOL
O15371	EIF3D	0	0	0.416282	0	0	0	0	0	0.583718	0	0	NUCLEUS
O15372	EIF3H	0	0	0.300061	0	0	0	0	0	0.699939	0	0	NUCLEUS
O15382	BCAT2	0	0	0	0	0	0	1	0	0	0	0	MITOCHONDRIA
O15394	NCAM2	0	0	0	0	0	0	0	0	0	0	1	PLASMA MEMBRANE
O15400	STX7	0	0	0	0	0	0.531028	0	0	0	0	0.468972	LYSOSOME
O15427	SLC16A3	0	0	0	0	0	0.622078	0	0	0	0	0.377922	LYSOSOME
O15431		0	0	0	0	0	0.640317	0	0	0	0	0.359683	LYSOSOME
O15439	ABCC4	0	0	0	0	0	0.31524	0	0	0	0	0.68476	PLASMA MEMBRANE
O15446-2	CD3EAP	0	1	0	0	0	0	0	0	0	0	0	CHROMATIN
O15460-2		0	0	0	0.527195	0	0.472805	0	0	0	0	0	ENDOPLASMIC RETICULUM
O15479	MAGEB2	1	0	0	0	0	0	0	0	0	0	0	40S/60S RIBOSOME
O15511	ARPC5	0.2733	0	0.184058	0	0	0	0	0	0.542642	0	0	NUCLEUS
O15523	DDX3Y	0.263548	0	0	0	0	0	0	0.413574	0.322878	0	0	NUCLEOLUS
O15525		0	0.925224	0.0747764	0	0	0	0	0	0	0	0	CHROMATIN
O15533-3	TAPBP	0	0	0	0	0.555569	0	0	0	0	0	0.444431	GOLGI APPARATUS
O15553	MEFV	0.323009	0.5655	0	0	0	0	0	0	0	0	0.111492	CHROMATIN
O15554		0	0	0	0	0	0.371727	0	0	0	0	0.628273	PLASMA MEMBRANE
O43143	DHX15	0	0	0.112998	0	0	0	0	0	0.887002	0	0	NUCLEUS
O43159		0	0	0	0	0	0	0	1	0	0	0	NUCLEOLUS
O43169	CYB5B	0	0	0	0.662277	0.337723	0	0	0	0	0	0	ENDOPLASMIC RETICULUM
O43175	PHGDH	0	0	1	0	0	0	0	0	0	0	0	CYTOSOL
O43181	NDUFS4	0	0	0	0	0	0	0.718265	0	0	0.281735	0	MITOCHONDRIA
O43237	DYNC1LI2	0.241073	0.494681	0.102469	0	0	0	0	0	0	0	0.161777	CHROMATIN
O43242	PSMD3	0	0	0.693487	0	0	0	0	0	0.306513	0	0	CYTOSOL
O43264	ZW10	0	0	0	1	0	0	0	0	0	0	0	ENDOPLASMIC RETICULUM
O43278-2		0	0	0	0	0	0	0	0	0	0	1	PLASMA MEMBRANE
O43290	SART1	0	0	0	0	0	0	0	0.589307	0.410693	0	0	NUCLEOLUS
O43292	GPAA1	0	0	0	0.571155	0.428845	0	0	0	0	0	0	ENDOPLASMIC RETICULUM
O43293	DAPK3	0.388827	0	0	0	0.42577	0	0	0	0	0	0.185404	GOLGI APPARATUS
O43314	PPIP5K2	0.185221	0.243272	0.154688	0	0	0	0	0	0.240472	0	0.176348	CHROMATIN
O43390	HNRNPR	0	0.242919	0	0	0	0	0	0	0.757081	0	0	NUCLEUS
O43395	PRPF3	0	0	0	0	0	0	0	0.381549	0.618451	0	0	NUCLEUS
O43396	TXNL1	0	0	0.717049	0	0	0	0	0	0.282951	0	0	CYTOSOL
O43399-7	TPD52L2	0	0	1	0	0	0	0	0	0	0	0	CYTOSOL
O43402	EMC8	0	0	0	0.537871	0.462129	0	0	0	0	0	0	ENDOPLASMIC RETICULUM
O43427	FIBP	0	0	0.139408	0	0	0.349882	0	0	0	0	0.51071	PLASMA MEMBRANE
O43432-3	EIF4G3	0.343205	0	0	0	0	0	0	0	0.656795	0	0	NUCLEUS
O43447	PPIH	0	0	0.712228	0	0	0	0	0	0.287772	0	0	CYTOSOL
O43464	HTRA2	0	0	0	0	0	0	1	0	0	0	0	MITOCHONDRIA
O43488	AKR7A2	0	0	0.728919	0	0	0	0	0	0.271081	0	0	CYTOSOL
O43491	EPB41L2	0	0	0	0	0	0	0	0	0	0	1	PLASMA MEMBRANE
O43493	TGOLN2	0	0	0	0	0	0.586372	0	0	0	0	0.413628	LYSOSOME
O43504	LAMTOR5	0	0	0	0	0	0.833197	0	0	0	0	0.166803	LYSOSOME
O43516	WIPF1	0	0	0.091543	0	0	0	0	0	0	0	0.908457	PLASMA MEMBRANE
O43566	RGS14	0	0	0.268409	0	0	0	0	0	0	0	0.731591	PLASMA MEMBRANE
O43567		0	0	0	0	0.25032	0	0	0	0	0	0.749681	PLASMA MEMBRANE
O43583	DENR	0	0.304658	0.162563	0	0	0	0	0	0.532779	0	0	NUCLEUS
O43586	PSTPIP1	0	0	0	0	0.41068	0	0	0	0	0	0.58932	PLASMA MEMBRANE
O43615	TIMM44	0	0	0	0	0	0	1	0	0	0	0	MITOCHONDRIA
O43617	TRAPPC3	0	0	0.480659	0	0	0	0	0	0	0	0.519341	PLASMA MEMBRANE
O43633	CHMP2A	0	0	0	0	0	0.606692	0	0	0	0	0.393308	LYSOSOME
O43639	NCK2	0	0	0.507262	0	0	0	0	0	0	0	0.492738	CYTOSOL
O43660	PLRG1	0.145763	0.151722	0	0	0	0	0	0.388424	0.314091	0	0	NUCLEOLUS
O43663		0	1	0	0	0	0	0	0	0	0	0	CHROMATIN
O43670-4	ZNF207	0.243198	0	0	0	0	0	0	0.338099	0.418703	0	0	NUCLEUS
O43674	NDUFB5	0	0	0	0	0	0	1	0	0	0	0	MITOCHONDRIA
O43676	NDUFB3	0	0	0	0	0	0	1	0	0	0	0	MITOCHONDRIA
O43678	NDUFA2	0	0.185578	0	0	0	0	0.522796	0	0	0.291626	0	MITOCHONDRIA
O43681		0	0	1	0	0	0	0	0	0	0	0	CYTOSOL
O43684-2	BUB3	0	0	0	0	0	0	0	0.372708	0.627292	0	0	NUCLEUS
O43707	ACTN4	0	0	0.790066	0	0	0	0	0	0	0	0.209934	CYTOSOL
O43708	GSTZ1	0	0	0.138028	0	0	0	0.861972	0	0	0	0	MITOCHONDRIA
O43715	TRIAP1	0	0	0	0	0	0	1	0	0	0	0	MITOCHONDRIA
O43716	GATC	0	0	0	0	0	0	1	0	0	0	0	MITOCHONDRIA
O43719	HTATSF1	0	0	0.350655	0	0	0	0	0	0.649345	0	0	NUCLEUS
O43747	AP1G1	0	0	0.108074	0.368453	0	0.523473	0	0	0	0	0	LYSOSOME
O43752		0	0	0	0	0	0.564712	0	0	0	0	0.435288	LYSOSOME
O43760-2	SYNGR2	0	0	0	0	0	0.69851	0	0	0	0	0.30149	LYSOSOME
O43768	ENSA	0	0	0.706905	0	0	0	0	0	0	0	0.293095	CYTOSOL
O43772		0	0	0	0	0	0	1	0	0	0	0	MITOCHONDRIA
O43776	NARS	0	0	0.741123	0	0	0	0	0	0.258877	0	0	CYTOSOL
O43809	NUDT21	0	0	0	0	0	0	0	0	1	0	0	NUCLEUS
O43813	LANCL1	0.212797	0	0.192118	0	0	0	0	0	0.595086	0	0	NUCLEUS
O43815	STRN	0	0	0.439643	0	0.560357	0	0	0	0	0	0	GOLGI APPARATUS
O43818	RRP9	0	0	0	0	0	0	0	0.830716	0.169284	0	0	NUCLEOLUS
O43819	SCO2	0	0	0	0	0	0	0.710865	0	0	0.289135	0	MITOCHONDRIA
O43820		0	0	0	0.529167	0.470833	0	0	0	0	0	0	ENDOPLASMIC RETICULUM
O43824	GTPBP6	0	0	0	0	0	0	0.674092	0	0	0.325908	0	MITOCHONDRIA
O43826-2		0	0	0	0.461659	0.538341	0	0	0	0	0	0	GOLGI APPARATUS
O43837	IDH3B	0	0	0	0	0	0	1	0	0	0	0	MITOCHONDRIA
O43847-2	NRDC	0	0	1	0	0	0	0	0	0	0	0	CYTOSOL
O43852-3	CALU	0	0	0.328909	0.67109	0	0	0	0	0	0	0	ENDOPLASMIC RETICULUM
O43861	ATP9B	0	0	0	0	0	0.344079	0	0	0	0	0.655921	PLASMA MEMBRANE
O43865	AHCYL1	0	0	0.275603	0	0	0.402117	0	0	0	0	0.32228	LYSOSOME
O43914	TYROBP	0	0	0	0	0.320702	0	0	0	0	0	0.679298	PLASMA MEMBRANE
O43920	NDUFS5	0	0	0	0	0	0	1	0	0	0	0	MITOCHONDRIA
O43933		0.21123	0	0	0	0	0	0.258463	0	0	0.530307	0	PEROXISOME
O60216	RAD21	0	0.70302	0	0	0	0	0	0	0.29698	0	0	CHROMATIN
O60220	TIMM8A	0	0	0	0	0	0	1	0	0	0	0	MITOCHONDRIA
O60234	GMFG	0	0	1	0	0	0	0	0	0	0	0	CYTOSOL
O60262	GNG7	0	0	0	0	0	0	0	0	0	0	1	PLASMA MEMBRANE
O60264	SMARCA5	0	1	0	0	0	0	0	0	0	0	0	CHROMATIN
O60266		0	0	0	0	0	0.559049	0	0	0	0	0.440951	LYSOSOME
O60271	SPAG9	0	0	1	0	0	0	0	0	0	0	0	CYTOSOL
O60306	AQR	0	0	0.050638	0	0	0	0	0.314236	0.635126	0	0	NUCLEUS
O60313-2	OPA1	0	0	0	0	0	0	1	0	0	0	0	MITOCHONDRIA
O60315	ZEB2	0	0.698519	0	0	0	0	0	0	0.301481	0	0	CHROMATIN
O60331-3	PIP5K1C	0	0	0.0530753	0	0	0	0	0	0	0	0.946925	PLASMA MEMBRANE
O60337	MARCH6	0	0	0	0.632113	0.367887	0	0	0	0	0	0	ENDOPLASMIC RETICULUM
O60341	KDM1A	0	0.495641	0	0	0	0	0	0	0.504359	0	0	NUCLEUS
O60353	FZD6	0	0	0	0	0	0	0	0	0	0	1	PLASMA MEMBRANE
O60427	FADS1	0	0	0	0.56944	0.43056	0	0	0	0	0	0	ENDOPLASMIC RETICULUM
O60462		0	0	0	0	0	0	0	0	0	0	1	PLASMA MEMBRANE
O60476	MAN1A2	0	0	0	0.423455	0.335249	0	0.241296	0	0	0	0	ENDOPLASMIC RETICULUM
O60488	ACSL4	0.204596	0	0	0.480181	0.315223	0	0	0	0	0	0	ENDOPLASMIC RETICULUM
O60493	SNX3	0	0	1	0	0	0	0	0	0	0	0	CYTOSOL
O60496	DOK2	0	0	0.911625	0	0	0	0	0	0	0	0.088375	CYTOSOL
O60503	ADCY9	0	0	0	0	0	0	0	0	0	0	1	PLASMA MEMBRANE
O60504	SORBS3	0.430334	0	0.160618	0	0	0	0	0	0	0	0.409048	40S/60S RIBOSOME
O60508		0	0	0	0	0	0	0	0.577915	0.422085	0	0	NUCLEOLUS
O60512		0	0	0	0	0	0.636807	0	0	0	0	0.363193	LYSOSOME
O60518		0	0	0	0	0	0	0.603251	0	0	0.396749	0	MITOCHONDRIA
O60524	NEMF	0	0	0.540387	0	0	0	0	0	0.459613	0	0	CYTOSOL
O60568	PLOD3	0	0	0	0.585558	0	0.414442	0	0	0	0	0	ENDOPLASMIC RETICULUM
O60573	EIF4E2	0.328102	0	0.071161	0	0	0	0	0	0.600737	0	0	NUCLEUS
O60603	TLR2	0	0	0	0	0	0.636653	0	0	0	0	0.363347	LYSOSOME
O60610	DIAPH1	0	0	1	0	0	0	0	0	0	0	0	CYTOSOL
O60613	2015-09-01	0.343615	0	0	0.656385	0	0	0	0	0	0	0	ENDOPLASMIC RETICULUM
O60645-3	EXOC3	0	0	0	0	0.267919	0.4599	0	0	0	0	0.272181	LYSOSOME
O60664	PLIN3	0	0	1	0	0	0	0	0	0	0	0	CYTOSOL
O60669	SLC16A7	0	0	0	0	0	0	0	0	0	0	1	PLASMA MEMBRANE
O60701	UGDH	0	0	0.699745	0	0	0	0	0	0.300255	0	0	CYTOSOL
O60704	TPST2	0	0	0	0	0.775366	0	0	0	0	0	0.224634	GOLGI APPARATUS
O60762	DPM1	0.314306	0	0	0.685694	0	0	0	0	0	0	0	ENDOPLASMIC RETICULUM
O60763	USO1	0	0	0.770358	0	0	0	0	0	0.229642	0	0	CYTOSOL
O60783	MRPS14	0	0	0	0	0.412066	0	0.587934	0	0	0	0	MITOCHONDRIA
O60784-2	TOM1	0	0	0.299055	0	0	0	0	0	0	0	0.700945	PLASMA MEMBRANE
O60826	CCDC22	0	0	0	0	0	0.765192	0	0	0	0	0.234808	LYSOSOME
O60830-2	TIMM17B	0	0	0	0	0	0	0.676087	0	0	0.323913	0	MITOCHONDRIA
O60832	DKC1	0	0.185056	0	0	0	0	0	0.601851	0.213093	0	0	NUCLEOLUS
O60841	EIF5B	0	0	0.772358	0	0	0	0	0	0.227642	0	0	CYTOSOL
O60858-3	TRIM13	0	0	0	0.444778	0.555222	0	0	0	0	0	0	GOLGI APPARATUS
O60861	GAS7	0	0	0	0	0	0	0	0	0	0	1	PLASMA MEMBRANE
O60869	EDF1	1	0	0	0	0	0	0	0	0	0	0	40S/60S RIBOSOME
O60879-2	DIAPH2	0	0.199665	0.0967469	0	0.32633	0	0	0	0	0	0.377258	PLASMA MEMBRANE
O60884	DNAJA2	0	0	0.551591	0	0	0	0	0	0.448409	0	0	CYTOSOL
O60885	BRD4	0	1	0	0	0	0	0	0	0	0	0	CHROMATIN
O60906		0	0	0	0.392711	0.365759	0	0	0	0	0	0.24153	ENDOPLASMIC RETICULUM
O60925	PFDN1	0	0	1	0	0	0	0	0	0	0	0	CYTOSOL
O60934	NBN	0	0.681427	0	0	0	0	0	0	0.318573	0	0	CHROMATIN
O60942	RNGTT	0.202957	0.343904	0	0	0	0	0	0	0.453139	0	0	NUCLEUS
O75027-2	ABCB7	0	0	0	0	0	0	1	0	0	0	0	MITOCHONDRIA
O75044	SRGAP2	0	0	0.0907736	0	0	0	0	0	0	0	0.909226	PLASMA MEMBRANE
O75052	NOS1AP	0	0	0	0	0	0.492558	0	0	0	0	0.507442	PLASMA MEMBRANE
O75063	FAM20B	0	0	0	0.563743	0.436257	0	0	0	0	0	0	ENDOPLASMIC RETICULUM
O75064	DENND4B	0	0	0.768048	0	0	0	0	0	0.231952	0	0	CYTOSOL
O75071	EFCAB14	0	0	0	0	0.390118	0.436827	0	0	0	0	0.173055	LYSOSOME
O75083	WDR1	0	0	1	0	0	0	0	0	0	0	0	CYTOSOL
O75116	ROCK2	0	0	0.230698	0	0	0	0	0	0	0	0.769302	PLASMA MEMBRANE
O75127	PTCD1	0	0	0	0	0	0	1	0	0	0	0	MITOCHONDRIA
O75131	CPNE3	0	0	0.823866	0	0	0	0	0	0	0	0.176134	CYTOSOL
O75144-2	ICOSLG	0	0	0.0759229	0	0	0	0	0	0	0	0.924077	PLASMA MEMBRANE
O75150	RNF40	0	0	0	0	0	0	0	0.378967	0.621033	0	0	NUCLEUS
O75152	ZC3H11A	0	0.30608	0	0	0	0	0	0.437619	0.256301	0	0	NUCLEOLUS
O75153	CLUH	0	0	0.512507	0	0	0	0	0	0.487493	0	0	CYTOSOL
O75164	KDM4A	0	0	0.618093	0	0	0	0	0	0.381907	0	0	CYTOSOL
O75165	DNAJC13	0	0	0	0	0	0.864467	0	0	0	0	0.135533	LYSOSOME
O75175	CNOT3	1	0	0	0	0	0	0	0	0	0	0	40S/60S RIBOSOME
O75208	COQ9	0	0	0	0	0	0	0.708117	0	0	0.291883	0	MITOCHONDRIA
O75251	NDUFS7	0	0	0	0	0	0	0.653503	0	0	0.346497	0	MITOCHONDRIA
O75298	RTN2	0	0	0	0.316253	0.355637	0.32811	0	0	0	0	0	GOLGI APPARATUS
O75306	NDUFS2	0	0	0	0	0	0	1	0	0	0	0	MITOCHONDRIA
O75323	GBAS	0	0	0	0	0	0	1	0	0	0	0	MITOCHONDRIA
O75330-3	HMMR	0.516594	0.483406	0	0	0	0	0	0	0	0	0	40S/60S RIBOSOME
O75347	TBCA	0	0	1	0	0	0	0	0	0	0	0	CYTOSOL
O75348	ATP6V1G1	0	0	0.678153	0	0	0	0	0	0	0	0.321847	CYTOSOL
O75351	VPS4B	0	0	0.882036	0	0	0	0	0	0	0	0.117964	CYTOSOL
O75356		0	0	0	0.587069	0	0.412931	0	0	0	0	0	ENDOPLASMIC RETICULUM
O75367	H2AFY	0	1	0	0	0	0	0	0	0	0	0	CHROMATIN
O75368	SH3BGRL	0	0	1	0	0	0	0	0	0	0	0	CYTOSOL
O75369-8	FLNB	0	0	1	0	0	0	0	0	0	0	0	CYTOSOL
O75376		0.339221	0	0.223642	0	0	0	0	0	0.437138	0	0	NUCLEUS
O75379	VAMP4	0	0	0	0	0	0.418767	0	0	0	0	0.581233	PLASMA MEMBRANE
O75380	NDUFS6	0	0	0	0	0	0	1	0	0	0	0	MITOCHONDRIA
O75381	PEX14	0	0	0	0	0	0	0.367842	0	0	0.632158	0	PEROXISOME
O75387		0	0	0	0	0	0	0	0	0	0	1	PLASMA MEMBRANE
O75390	CS	0	0	0	0	0	0	1	0	0	0	0	MITOCHONDRIA
O75394	MRPL33	0	0	0	0	0	0	0.622622	0	0	0.377378	0	MITOCHONDRIA
O75396	SEC22B	0	0	0	0.323545	0.357035	0.31942	0	0	0	0	0	GOLGI APPARATUS
O75400	PRPF40A	0	0.286275	0	0	0	0	0	0	0.713725	0	0	NUCLEUS
O75410-2	TACC1	0	0	0.761562	0	0	0	0	0	0.238438	0	0	CYTOSOL
O75414		0	0	0	0	0	0	1	0	0	0	0	MITOCHONDRIA
O75427	LRCH4	0	0	0	0	0	0	0	0	0	0	1	PLASMA MEMBRANE
O75431		0	0	0	0	0	0	0.71209	0	0	0.28791	0	MITOCHONDRIA
O75436	VPS26A	0	0	0.848257	0	0	0	0	0	0	0	0.151743	CYTOSOL
O75439	PMPCB	0	0	0	0	0	0	1	0	0	0	0	MITOCHONDRIA
O75460		0.260695	0	0	0.739305	0	0	0	0	0	0	0	ENDOPLASMIC RETICULUM
O75475	PSIP1	0	1	0	0	0	0	0	0	0	0	0	CHROMATIN
O75477	ERLIN1	0	0	0	1	0	0	0	0	0	0	0	ENDOPLASMIC RETICULUM
O75487		0	0	0	0	0	0	0	0	0	0	1	PLASMA MEMBRANE
O75489	NDUFS3	0	0	0	0	0	0	1	0	0	0	0	MITOCHONDRIA
O75521	ECI2	0	0	0	0	0	0	0.527137	0	0	0.472863	0	MITOCHONDRIA
O75531	BANF1	0	0.291984	0.452113	0	0	0	0	0	0.255903	0	0	CYTOSOL
O75533	SF3B1	0	0	0	0	0	0	0	0	1	0	0	NUCLEUS
O75534-4	CSDE1	0	0	0.695725	0	0	0	0	0	0.304275	0	0	CYTOSOL
O75558		0	0	0	0	0	0.351525	0	0	0	0	0.648475	PLASMA MEMBRANE
O75569		1	0	0	0	0	0	0	0	0	0	0	40S/60S RIBOSOME
O75570		0	0	0	0	0	0	0.627958	0	0	0.372042	0	MITOCHONDRIA
O75592-2		0.320019	0	0	0	0	0	0	0.434673	0.245308	0	0	NUCLEOLUS
O75608	LYPLA1	0	0	0.619611	0	0	0	0	0	0.380389	0	0	CYTOSOL
O75616	ERAL1	0	0	0	0	0	0	1	0	0	0	0	MITOCHONDRIA
O75643	SNRNP200	0	0	0	0	0	0	0	0.289743	0.710257	0	0	NUCLEUS
O75689	ADAP1	0	0	0.394321	0	0	0	0	0	0	0	0.605679	PLASMA MEMBRANE
O75694	NUP155	0	0.481619	0.136987	0	0	0	0	0	0.381395	0	0	CHROMATIN
O75695	RP2	0	0	0	0	0	0	0	0	0	0	1	PLASMA MEMBRANE
O75716		0	0	0	0	0	0.289527	0	0	0	0	0.710473	PLASMA MEMBRANE
O75718	CRTAP	0	0	0	0.484688	0	0.515312	0	0	0	0	0	LYSOSOME
O75746	SLC25A12	0	0	0	0	0	0	1	0	0	0	0	MITOCHONDRIA
O75781	PALM	0	0	0	0	0	0.333938	0	0	0	0	0.666062	PLASMA MEMBRANE
O75787	ATP6AP2	0	0	0	1	0	0	0	0	0	0	0	ENDOPLASMIC RETICULUM
O75821	EIF3G	0	0	0.288475	0	0	0	0	0	0.711525	0	0	NUCLEUS
O75822	EIF3J	0	0	0.418664	0	0	0	0	0	0.581336	0	0	NUCLEUS
O75832	PSMD10	0	0	1	0	0	0	0	0	0	0	0	CYTOSOL
O75843	AP1G2	0	0	0.625528	0	0	0	0	0	0.374472	0	0	CYTOSOL
O75844	ZMPSTE24	0	0	0	0.446399	0.25918	0.294421	0	0	0	0	0	ENDOPLASMIC RETICULUM
O75845	SC5D	0	0	0	0.397496	0.398665	0	0	0	0	0	0.203839	GOLGI APPARATUS
O75874	IDH1	0	0	1	0	0	0	0	0	0	0	0	CYTOSOL
O75879	GATB	0	0	0	0	0	0	1	0	0	0	0	MITOCHONDRIA
O75880	SCO1	0	0	0	0	0	0	0.646263	0	0	0.353737	0	MITOCHONDRIA
O75882	ATRN	0	0	0	0	0	0.421558	0	0	0	0	0.578442	PLASMA MEMBRANE
O75907		0	0	0	0	0.433421	0	0	0	0	0.566579	0	PEROXISOME
O75909-4		0.344979	0.234136	0	0	0	0	0	0	0.420886	0	0	NUCLEUS
O75915	ARL6IP5	0	0	0	0.656786	0.343214	0	0	0	0	0	0	ENDOPLASMIC RETICULUM
O75934	BCAS2	0	0	0	0	0	0	0	0.553789	0.446211	0	0	NUCLEOLUS
O75937	DNAJC8	0	0.168628	0.14709	0	0	0	0	0	0.684282	0	0	NUCLEUS
O75940	SMNDC1	0	0	0.223259	0	0	0	0	0	0.776741	0	0	NUCLEUS
O75947	ATP5H	0	0	0	0	0	0	0.682254	0	0	0.317746	0	MITOCHONDRIA
O75955	FLOT1	0	0	0	0	0	0.576314	0	0	0	0	0.423686	LYSOSOME
O75964	ATP5L	0	0	0	0	0	0	1	0	0	0	0	MITOCHONDRIA
O75976	CPD	0	0	0	0	0	0.284808	0	0	0	0	0.715192	PLASMA MEMBRANE
O76021	RSL1D1	0	0	0	0	0	0	0	0.813926	0.186074	0	0	NUCLEOLUS
O76031	CLPX	0	0	0	0	0	0	1	0	0	0	0	MITOCHONDRIA
O76062		0.236724	0	0	0.472497	0.290779	0	0	0	0	0	0	ENDOPLASMIC RETICULUM
O76071	CIAO1	0	0	1	0	0	0	0	0	0	0	0	CYTOSOL
O76094	SRP72	0.264615	0	0.27625	0	0	0	0	0	0.459134	0	0	NUCLEUS
O76095		0	0	0	0	0	0	0	0	0	0	1	PLASMA MEMBRANE
O94759	TRPM2	0	0	0	0.253993	0.262343	0.483664	0	0	0	0	0	LYSOSOME
O94766	B3GAT3	0	0	0	0	1	0	0	0	0	0	0	GOLGI APPARATUS
O94776	MTA2	0	0.249302	0.228208	0	0	0	0	0	0.522489	0	0	NUCLEUS
O94804	STK10	0	0.304628	0.0757185	0	0	0	0	0	0	0	0.619654	PLASMA MEMBRANE
O94819	KBTBD11	0.403981	0	0.192238	0	0	0	0	0	0.403782	0	0	40S/60S RIBOSOME
O94826	TOMM70	0	0	0	0	0	0	1	0	0	0	0	MITOCHONDRIA
O94851-4	MICAL2	0.207431	0	0	0.40127	0.391299	0	0	0	0	0	0	ENDOPLASMIC RETICULUM
O94855-2	SEC24D	0.413579	0	0.586421	0	0	0	0	0	0	0	0	CYTOSOL
O94874	UFL1	0	0	0	1	0	0	0	0	0	0	0	ENDOPLASMIC RETICULUM
O94876		0.287385	0	0	0	0.433513	0	0	0	0	0	0.279102	GOLGI APPARATUS
O94885	SASH1	0	0	0.768051	0	0	0	0	0	0	0	0.231949	CYTOSOL
O94886	TMEM63A	0	0	0	0	0	0.468205	0	0	0	0	0.531795	PLASMA MEMBRANE
O94901-9		0	0.534886	0	0	0	0	0.465113	0	0	0	0	CHROMATIN
O94903	PROSC	0	0	1	0	0	0	0	0	0	0	0	CYTOSOL
O94905	ERLIN2	0	0	0	0.642808	0	0.357192	0	0	0	0	0	ENDOPLASMIC RETICULUM
O94906	PRPF6	0	0	0	0	0	0	0	0.455795	0.544205	0	0	NUCLEUS
O94915	FRYL	0	0	0.638594	0	0	0	0	0	0	0	0.361406	CYTOSOL
O94919	ENDOD1	0	0	0	0	0.452562	0.463267	0	0	0	0	0.0841705	LYSOSOME
O94925-3	GLS	0	0	0	0	0	0	0.711537	0	0	0.288463	0	MITOCHONDRIA
O94966-5	USP19	0	0	1	0	0	0	0	0	0	0	0	CYTOSOL
O94979-8		0	0	0.109099	0	0	0	0	0	0.890901	0	0	NUCLEUS
O95067		0.428684	0.571316	0	0	0	0	0	0	0	0	0	CHROMATIN
O95070		0	0	0	0	0.611041	0	0	0	0	0	0.388959	GOLGI APPARATUS
O95104	SCAF4	0.156779	0	0	0	0	0	0	0.531346	0.311874	0	0	NUCLEOLUS
O95139	NDUFB6	0	0	0	0	0	0	0.611141	0	0	0.388859	0	MITOCHONDRIA
O95140	MFN2	0	0	0	0	0	0	1	0	0	0	0	MITOCHONDRIA
O95159	ZFPL1	0	0	0	0	0	0	0.493788	0	0	0.506212	0	PEROXISOME
O95163	IKBKAP	0	0	1	0	0	0	0	0	0	0	0	CYTOSOL
O95168	NDUFB4	0	0	0	0	0	0	0.694161	0	0	0.305839	0	MITOCHONDRIA
O95169	NDUFB8	0	0	0	0	0	0	1	0	0	0	0	MITOCHONDRIA
O95182	NDUFA7	0	0	0	0	0	0	0.664348	0	0	0.335652	0	MITOCHONDRIA
O95197-3		0	0	0	0.502974	0	0.497026	0	0	0	0	0	ENDOPLASMIC RETICULUM
O95202	LETM1	0	0	0	0	0	0	1	0	0	0	0	MITOCHONDRIA
O95210	STBD1	0	0	0	0.335	0.291101	0.3739	0	0	0	0	0	LYSOSOME
O95218		0	0	0.760874	0	0	0	0	0	0.239126	0	0	CYTOSOL
O95232	LUC7L3	0	0	0.0639515	0	0	0	0	0	0.936049	0	0	NUCLEUS
O95239	KIF4A	0	1	0	0	0	0	0	0	0	0	0	CHROMATIN
O95248-4	SBF1	0.257049	0	0.0806611	0	0	0	0	0	0	0	0.66229	PLASMA MEMBRANE
O95249	GOSR1	0	0	0	0.311301	0.32303	0.365669	0	0	0	0	0	LYSOSOME
O95292	VAPB	0	0	0	0.591507	0	0.408493	0	0	0	0	0	ENDOPLASMIC RETICULUM
O95298	NDUFC2	0	0	0	0	0	0	1	0	0	0	0	MITOCHONDRIA
O95299	NDUFA10	0	0	0	0	0	0	1	0	0	0	0	MITOCHONDRIA
O95302-3		0	0	0	0.442642	0	0.557358	0	0	0	0	0	LYSOSOME
O95336	PGLS	0	0	1	0	0	0	0	0	0	0	0	CYTOSOL
O95347	SMC2	0	0.713897	0	0	0	0	0	0	0.286103	0	0	CHROMATIN
O95372	LYPLA2	0	0	1	0	0	0	0	0	0	0	0	CYTOSOL
O95373	IPO7	0	0	1	0	0	0	0	0	0	0	0	CYTOSOL
O95400	CD2BP2	0	0	0.0816393	0	0	0	0	0	0.918361	0	0	NUCLEUS
O95415		0	0	0	0	0	0	0	0	0	0	1	PLASMA MEMBRANE
O95433	AHSA1	0	0	1	0	0	0	0	0	0	0	0	CYTOSOL
O95450	ADAMTS2	0	0	0	0	0.535754	0	0	0	0	0	0.464246	GOLGI APPARATUS
O95466-2		0	0	0.512663	0	0	0	0	0	0	0	0.487337	CYTOSOL
O95470		0	0	0	0.605886	0.394114	0	0	0	0	0	0	ENDOPLASMIC RETICULUM
O95477	ABCA1	0	0	0	0	0	0.326623	0	0	0	0	0.673377	PLASMA MEMBRANE
O95479	H6PD	0	0	0	0.506403	0	0.493597	0	0	0	0	0	ENDOPLASMIC RETICULUM
O95486	SEC24A	1	0	0	0	0	0	0	0	0	0	0	40S/60S RIBOSOME
O95487-3	SEC24B	0.222717	0	0	0.458822	0.318462	0	0	0	0	0	0	ENDOPLASMIC RETICULUM
O95490-5		0	0	0	0	0	0	0	0	0	0	1	PLASMA MEMBRANE
O95562		0	0	0	0	0	0	0	0	0	0	1	PLASMA MEMBRANE
O95571	ETHE1	0	0	0	0	0	0	1	0	0	0	0	MITOCHONDRIA
O95573	ACSL3	0	0	0	1	0	0	0	0	0	0	0	ENDOPLASMIC RETICULUM
O95602	POLR1A	0	0.710579	0	0	0	0	0	0	0.289421	0	0	CHROMATIN
O95613	PCNT	0	1	0	0	0	0	0	0	0	0	0	CHROMATIN
O95630		0	0	0.717452	0	0	0	0	0	0	0	0.282548	CYTOSOL
O95671		0	0	0.880165	0	0	0	0	0	0	0	0.119835	CYTOSOL
O95674		0	0	0	0.42799	0.250941	0.321069	0	0	0	0	0	ENDOPLASMIC RETICULUM
O95696-2		0	1	0	0	0	0	0	0	0	0	0	CHROMATIN
O95714	HERC2	1	0	0	0	0	0	0	0	0	0	0	40S/60S RIBOSOME
O95716	RAB3D	0	0	0	0.530119	0	0.469881	0	0	0	0	0	ENDOPLASMIC RETICULUM
O95721	SNAP29	0	0	0	0	0	0.498383	0	0	0	0	0.501617	PLASMA MEMBRANE
O95747	OXSR1	0	0	1	0	0	0	0	0	0	0	0	CYTOSOL
O95757	HSPA4L	0	0	1	0	0	0	0	0	0	0	0	CYTOSOL
O95758-4	PTBP3	0	0.509477	0	0	0	0	0	0	0.490523	0	0	CHROMATIN
O95782	AP2A1	0	0	0	0	0	0.82824	0	0	0	0	0.17176	LYSOSOME
O95785-3		0	1	0	0	0	0	0	0	0	0	0	CHROMATIN
O95793	STAU1	1	0	0	0	0	0	0	0	0	0	0	40S/60S RIBOSOME
O95816	BAG2	0.268916	0	0	0.365747	0	0	0	0	0	0.365337	0	ENDOPLASMIC RETICULUM
O95817	BAG3	0.244797	0	0.404017	0	0	0	0	0	0	0	0.351186	CYTOSOL
O95819-3	MAP4K4	0	0	0	0	0	0	0	0	0	0	1	PLASMA MEMBRANE
O95822	MLYCD	0	0	0	0	0	0	1	0	0	0	0	MITOCHONDRIA
O95825	CRYZL1	0	0	0.57172	0	0	0	0	0	0.42828	0	0	CYTOSOL
O95831	AIFM1	0	0	0	0	0	0	1	0	0	0	0	MITOCHONDRIA
O95861	BPNT1	0	0	1	0	0	0	0	0	0	0	0	CYTOSOL
O95864	FADS2	0	0	0	1	0	0	0	0	0	0	0	ENDOPLASMIC RETICULUM
O95865	DDAH2	0	0	0.162113	0	0	0	0	0	0	0	0.837887	PLASMA MEMBRANE
O95870	ABHD16A	0	0	0	1	0	0	0	0	0	0	0	ENDOPLASMIC RETICULUM
O95873		0	0	0	0	0.464056	0.404421	0	0	0	0	0.131523	GOLGI APPARATUS
O95881	TXNDC12	0	0	0	0.474038	0	0.525962	0	0	0	0	0	LYSOSOME
O95900	TRUB2	0	0	0	0	0	0	1	0	0	0	0	MITOCHONDRIA
O95980	RECK	0	0	0	0	0	0	0	0	0	0	1	PLASMA MEMBRANE
O95983		0	0.359955	0.101574	0	0	0	0	0	0.538472	0	0	NUCLEUS
O96000	NDUFB10	0	0	0	0	0	0	0.722146	0	0	0.277854	0	MITOCHONDRIA
O96005	CLPTM1	0	0	0	0.448015	0.279323	0.272661	0	0	0	0	0	ENDOPLASMIC RETICULUM
O96008	TOMM40	0	0	0	0	0	0	1	0	0	0	0	MITOCHONDRIA
O96011	PEX11B	0	0	0	0	0	0	0.3985	0	0	0.6015	0	PEROXISOME
O96013	PAK4	0	0	0.101771	0	0	0	0	0	0	0	0.898229	PLASMA MEMBRANE
O96019	ACTL6A	0	0.257505	0.200254	0	0	0	0	0	0.542241	0	0	NUCLEUS
O96028		0	1	0	0	0	0	0	0	0	0	0	CHROMATIN
P00167	CYB5A	0.28615	0	0	0.71385	0	0	0	0	0	0	0	ENDOPLASMIC RETICULUM
P00338-3	LDHA	0	0	1	0	0	0	0	0	0	0	0	CYTOSOL
P00367	GLUD1	0	0	0	0	0	0	1	0	0	0	0	MITOCHONDRIA
P00387-3	CYB5R3	0	0	0	0.5341	0.4659	0	0	0	0	0	0	ENDOPLASMIC RETICULUM
P00390-2		0.210886	0.19819	0.283346	0	0	0	0	0	0.307578	0	0	NUCLEUS
P00441	SOD1	0	0	1	0	0	0	0	0	0	0	0	CYTOSOL
P00491	PNP	0	0	1	0	0	0	0	0	0	0	0	CYTOSOL
P00492	HPRT1	0	0	1	0	0	0	0	0	0	0	0	CYTOSOL
P00505	GOT2	0	0	0	0	0	0	1	0	0	0	0	MITOCHONDRIA
P00519-2	ABL1	0	0	0.118031	0	0	0	0	0	0	0	0.881969	PLASMA MEMBRANE
P00558	PGK1.00	0	0	0.311268	0	0	0	0	0	0	0	0.688732	PLASMA MEMBRANE
P00568		0	0	1	0	0	0	0	0	0	0	0	CYTOSOL
P00746	CFD	0	0	0	0	0.30116	0.294079	0	0	0	0	0.404761	PLASMA MEMBRANE
P00747	PLG	0.293106	0.589059	0.117836	0	0	0	0	0	0	0	0	CHROMATIN
P00749	PLAU	0	0	0	0	0	0	0	0	0	0	1	PLASMA MEMBRANE
P00846	MT-ATP6	0	0	0	0	0	0	0.761947	0	0	0	0.238053	MITOCHONDRIA
P00918	CA2	0	0	1	0	0	0	0	0	0	0	0	CYTOSOL
P00966	ASS1	0	0	0.666011	0	0	0	0	0	0.333989	0	0	CYTOSOL
P00973	OAS1	0.209398	0	0	0.461188	0.329414	0	0	0	0	0	0	ENDOPLASMIC RETICULUM
P01023		0	0	0.0869332	0	0.420999	0.39764	0	0	0	0	0.0944275	GOLGI APPARATUS
P01024		0.213583	0	0	0	0.3288	0.457618	0	0	0	0	0	LYSOSOME
P01033		0	0	0.0769481	0	0	0.36466	0	0	0	0	0.558392	PLASMA MEMBRANE
P01034	CST3	0	0	0	0	0.253221	0.533441	0	0	0	0	0.213338	LYSOSOME
P01111	NRAS	0	0	0	0	0	0	0	0	0	0	1	PLASMA MEMBRANE
P01112	HRAS	0	0	0.0551886	0	0	0	0	0	0	0	0.944811	PLASMA MEMBRANE
P01130	LDLR	0	0	0	0	0.292397	0.346462	0	0	0	0	0.361141	PLASMA MEMBRANE
P01137	TGFB1	0.169689	0	0	0.380983	0	0.449329	0	0	0	0	0	LYSOSOME
P01730		0	0	0	0	0	0.378154	0	0	0	0	0.621846	PLASMA MEMBRANE
P01892	HLA-A	0	0	0	0	0	0	0	0	0	0	1	PLASMA MEMBRANE
P02042	HBD	0	0.69695	0	0	0	0	0.30305	0	0	0	0	CHROMATIN
P02545	LMNA	0	1	0	0	0	0	0	0	0	0	0	CHROMATIN
P02649	APOE	0	0	0	0.5922	0.4078	0	0	0	0	0	0	ENDOPLASMIC RETICULUM
P02655	APOC2	0.177635	0	0	0.387503	0	0.434862	0	0	0	0	0	LYSOSOME
P02686	MBP	0	0	0	0	0	0	0	0	0	0	1	PLASMA MEMBRANE
P02765	AHSG	0	0.350146	0.245274	0	0	0	0	0	0.40458	0	0	NUCLEUS
P02786	TFRC	0	0	0	0	0	0.742987	0	0	0	0	0.257013	LYSOSOME
P02792	FTL	0	0	0	0	0	1	0	0	0	0	0	LYSOSOME
P02794	FTH1	0	0	0.235557	0	0	0.764443	0	0	0	0	0	LYSOSOME
P04035-3	HMGCR	0	0	0	0.470584	0.529416	0	0	0	0	0	0	GOLGI APPARATUS
P04040	CAT	0.343396	0	0.232974	0	0	0	0	0	0.42363	0	0	NUCLEUS
P04062	GBA	0	0	0	0.286547	0	0.713453	0	0	0	0	0	LYSOSOME
P04066		0.335473	0	0	0	0	0.358906	0	0	0	0	0.305621	LYSOSOME
P04075	ALDOA	0	0	1	0	0	0	0	0	0	0	0	CYTOSOL
P04080	CSTB	0	0	1	0	0	0	0	0	0	0	0	CYTOSOL
P04083	ANXA1	0	0	0.79412	0	0	0	0	0	0	0	0.20588	CYTOSOL
P04150-3		0	0	0.474816	0	0	0	0	0	0.381102	0	0.144081	CYTOSOL
P04156		0	0	0	0	0	0	0	0	0	0	1	PLASMA MEMBRANE
P04179	SOD2	0	0	0	0	0	0	1	0	0	0	0	MITOCHONDRIA
P04181	OAT	0	0	0	0	0	0	1	0	0	0	0	MITOCHONDRIA
P04183	TK1	0.263783	0	0.361483	0	0	0	0	0	0.374734	0	0	NUCLEUS
P04222		0	0	0	0	0	0.503024	0	0	0	0	0.496977	LYSOSOME
P04406	GAPDH	0.194536	0	0.226304	0	0	0	0	0	0.579161	0	0	NUCLEUS
P04632	CAPNS1	0	0	1	0	0	0	0	0	0	0	0	CYTOSOL
P04792	HSPB1	0	0	0.887399	0	0	0	0	0	0	0	0.112601	CYTOSOL
P04818	TYMS	0	0	0.481135	0	0	0	0	0	0.518865	0	0	NUCLEUS
P04839	CYBB	0	0	0	0	0	0.616868	0	0	0	0	0.383132	LYSOSOME
P04843	RPN1	0	0	0	1	0	0	0	0	0	0	0	ENDOPLASMIC RETICULUM
P04899-3	GNAI2	0	0	0	0	0	0	0	0	0	0	1	PLASMA MEMBRANE
P04908		0	1	0	0	0	0	0	0	0	0	0	CHROMATIN
P04920	SLC4A2	0	0	0	0	0	0.299591	0	0	0	0	0.700409	PLASMA MEMBRANE
P04921	GYPC	0	0	0	0	0	0	0	0	0	0	1	PLASMA MEMBRANE
P05023	ATP1A1	0	0	0	0	0	0	0	0	0	0	1	PLASMA MEMBRANE
P05026		0	0	0	0	0	0	0	0	0	0	1	PLASMA MEMBRANE
P05067	APP	0	0	0	0	0.456074	0.352676	0	0	0	0	0.19125	GOLGI APPARATUS
P05091	ALDH2	0	0	0	0	0	0	1	0	0	0	0	MITOCHONDRIA
P05107	ITGB2	0	0	0	0	0.405751	0.486126	0	0	0	0	0.108123	LYSOSOME
P05114	HMGN1	0	0.800451	0	0	0	0	0.199549	0	0	0	0	CHROMATIN
P05141	SLC25A5	0	0	0	0	0	0	1	0	0	0	0	MITOCHONDRIA
P05161	ISG15	0	0	0.625105	0	0	0	0	0	0.374895	0	0	CYTOSOL
P05165	PCCA	0	0	0	0	0	0	1	0	0	0	0	MITOCHONDRIA
P05166-2	PCCB	0	0	0	0	0	0	1	0	0	0	0	MITOCHONDRIA
P05198	EIF2S1	0	0.282993	0.0548822	0	0	0	0	0	0.662125	0	0	NUCLEUS
P05204	HMGN2	0	1	0	0	0	0	0	0	0	0	0	CHROMATIN
P05362	ICAM1	0	0	0	0	0	0	0	0	0	0	1	PLASMA MEMBRANE
P05387	RPLP2	0.682074	0	0	0	0	0	0	0	0.317927	0	0	40S/60S RIBOSOME
P05388	RPLP0	1	0	0	0	0	0	0	0	0	0	0	40S/60S RIBOSOME
P05455	SSB	0	0	1	0	0	0	0	0	0	0	0	CYTOSOL
P05556	ITGB1	0	0	0	0	0	0	0	0	0	0	1	PLASMA MEMBRANE
P05771-2	PRKCB	0	0	0.558968	0	0	0	0	0	0	0	0.441032	CYTOSOL
P06213		0	0	0	0	0	0	0	0	0	0	1	PLASMA MEMBRANE
P06280	GLA	0	0	0	0.315969	0	0.684031	0	0	0	0	0	LYSOSOME
P06396	GSN	0	0	0.0529033	0	0	0	0	0	0	0	0.947097	PLASMA MEMBRANE
P06400	RB1	0	0.72244	0	0	0	0	0	0	0.27756	0	0	CHROMATIN
P06454	PTMA	0	0	1	0	0	0	0	0	0	0	0	CYTOSOL
P06493	CDK1	0.175985	0.291843	0.143666	0	0	0	0	0	0.388507	0	0	NUCLEUS
P06576	ATP5B	0	0	0	0	0	0	0.669433	0	0	0.330567	0	MITOCHONDRIA
P06702	S100A9	0	0	1	0	0	0	0	0	0	0	0	CYTOSOL
P06730-2		0	0	0.34438	0	0	0	0	0	0.65562	0	0	NUCLEUS
P06733	ENO1	0	0	1	0	0	0	0	0	0	0	0	CYTOSOL
P06737	PYGL	0	0	1	0	0	0	0	0	0	0	0	CYTOSOL
P06744	GPI	0	0	0.715107	0	0	0	0	0	0.284893	0	0	CYTOSOL
P06753	TPM3	0	0	1	0	0	0	0	0	0	0	0	CYTOSOL
P06753-2	TPM3	0	0	0.930315	0	0	0	0	0	0	0	0.0696847	CYTOSOL
P06756	ITGAV	0	0	0	0	0	0	0	0	0	0	1	PLASMA MEMBRANE
P06858		0	0	0	0	0.525127	0.323503	0	0	0	0	0.15137	GOLGI APPARATUS
P06865	HEXA	0	0	0	0.402597	0	0.597403	0	0	0	0	0	LYSOSOME
P07099	EPHX1	0	0	0	0.654575	0	0.345425	0	0	0	0	0	ENDOPLASMIC RETICULUM
P07195	LDHB	0	0	1	0	0	0	0	0	0	0	0	CYTOSOL
P07203	GPX1	0	0	0.489076	0	0	0	0	0	0.510924	0	0	NUCLEUS
P07204	THBD	0	0	0	0	0	0	0	0	0	0	1	PLASMA MEMBRANE
P07225	PROS1	0	0	0	0.460536	0	0.539464	0	0	0	0	0	LYSOSOME
P07237	P4HB	0	0	0	0.435105	0	0.564895	0	0	0	0	0	LYSOSOME
P07305	H1F0	0	1	0	0	0	0	0	0	0	0	0	CHROMATIN
P07332	FES	0.418193	0.581807	0	0	0	0	0	0	0	0	0	CHROMATIN
P07333	CSF1R	0	0	0	0	0	0	0	0	0	0	1	PLASMA MEMBRANE
P07339	CTSD	0	0	0	0	0	1	0	0	0	0	0	LYSOSOME
P07355-2	ANXA2	0	0	0	0	0	0.31582	0	0	0	0	0.68418	PLASMA MEMBRANE
P07384	CAPN1	0	0	1	0	0	0	0	0	0	0	0	CYTOSOL
P07437	TUBB	0	0	0.752111	0	0	0	0	0	0.247889	0	0	CYTOSOL
P07602-3	PSAP	0	0	0	0.358684	0	0.641316	0	0	0	0	0	LYSOSOME
P07686	HEXB	0	0	0	0	0	1	0	0	0	0	0	LYSOSOME
P07711	CTSL	0	0	0	0	0.228652	0.436254	0	0	0	0	0.335094	LYSOSOME
P07737	PFN1	0	0	1	0	0	0	0	0	0	0	0	CYTOSOL
P07741	APRT	0	0	1	0	0	0	0	0	0	0	0	CYTOSOL
P07814	EPRS	0	0	0.758548	0	0	0	0	0	0.241452	0	0	CYTOSOL
P07858	CTSB	0	0	0	0	0	0.878667	0	0	0	0	0.121333	LYSOSOME
P07900-2	HSP90AA1	0	0	1	0	0	0	0	0	0	0	0	CYTOSOL
P07902	GALT	0	0	1	0	0	0	0	0	0	0	0	CYTOSOL
P07910-2	HNRNPC	0	0.303543	0	0	0	0	0	0	0.696457	0	0	NUCLEUS
P07919	UQCRH	0	0	0	0	0	0	1	0	0	0	0	MITOCHONDRIA
P07947	YES1	0	0	0	0	0	0	0	0	0	0	1	PLASMA MEMBRANE
P07954		0	0	0	0	0	0	1	0	0	0	0	MITOCHONDRIA
P07996	THBS1	0	0	0	0	0.582426	0	0	0	0	0	0.417574	GOLGI APPARATUS
P08133	ANXA6	0	0	0.504883	0	0	0	0	0	0	0	0.495117	CYTOSOL
P08134	RHOC	0	0	0.339395	0	0	0	0	0	0	0	0.660605	PLASMA MEMBRANE
P08174-2	CD55	0	0	0	0	0	0	0	0	0	0	1	PLASMA MEMBRANE
P08195-2	SLC3A2	0	0	0	0	0	0.336825	0	0	0	0	0.663175	PLASMA MEMBRANE
P08236	GUSB	0	0	0	0.378636	0	0.621364	0	0	0	0	0	LYSOSOME
P08238	HSP90AB1	0	0	1	0	0	0	0	0	0	0	0	CYTOSOL
P08240	SRPRA	0	0	0	1	0	0	0	0	0	0	0	ENDOPLASMIC RETICULUM
P08243	ASNS	0	0	1	0	0	0	0	0	0	0	0	CYTOSOL
P08246	ELANE	0	0	0	0	0.358345	0.47453	0	0	0	0	0.167126	LYSOSOME
P08311	CTSG	0	0	0	0	0.298631	0	0	0	0	0	0.701369	PLASMA MEMBRANE
P08397	HMBS	0	0	1	0	0	0	0	0	0	0	0	CYTOSOL
P08559	PDHA1	0	0	0	0	0	0	1	0	0	0	0	MITOCHONDRIA
P08567	PLEK	0	0	0.228066	0	0	0	0	0	0	0	0.771934	PLASMA MEMBRANE
P08571	CD14	0	0	0	0	0	0	0	0	0	0	1	PLASMA MEMBRANE
P08574	CYC1	0	0	0	0	0	0	1	0	0	0	0	MITOCHONDRIA
P08575	PTPRC	0	0	0	0	0	0	0	0	0	0	1	PLASMA MEMBRANE
P08579	SNRPB2	0	0	0	0	0	0	0	0	1	0	0	NUCLEUS
P08582	MELTF	0	0	0	0	0	0	0	0	0	0	1	PLASMA MEMBRANE
P08621	SNRNP70	0	0	0	0	0	0	0	0.260391	0.739609	0	0	NUCLEUS
P08631	HCK	0	0	0	0	0	0	0	0	0	0	1	PLASMA MEMBRANE
P08648	ITGA5	0	0	0	0	0	0	0	0	0	0	1	PLASMA MEMBRANE
P08670	VIM	0	0	0.408607	0	0	0	0	0	0.591393	0	0	NUCLEUS
P08708	RPS17	1	0	0	0	0	0	0	0	0	0	0	40S/60S RIBOSOME
P08754	GNAI3	0	0	0	0	0	0	0	0	0	0	1	PLASMA MEMBRANE
P08758	ANXA5	0	0	0.866518	0	0	0	0	0	0	0	0.133482	CYTOSOL
P08865	RPSA	1	0	0	0	0	0	0	0	0	0	0	40S/60S RIBOSOME
P08887	IL6R	0	0	0	0	0	0	0	0	0	0	1	PLASMA MEMBRANE
P08962	CD63	0	0	0	0	0	0.790095	0	0	0	0	0.209905	LYSOSOME
P09001	MRPL3	0	0	0	0	0	0	1	0	0	0	0	MITOCHONDRIA
P09012	SNRPA	0	0	0	0	0	0	0	0.3191	0.6809	0	0	NUCLEUS
P09110	ACAA1	0.223119	0.284347	0	0	0	0	0	0	0	0.492534	0	PEROXISOME
P09132	SRP19	0.318813	0.513322	0.167865	0	0	0	0	0	0	0	0	CHROMATIN
P09211	GSTP1	0	0	1	0	0	0	0	0	0	0	0	CYTOSOL
P09382	LGALS1	0	0	1	0	0	0	0	0	0	0	0	CYTOSOL
P09417	QDPR	0	0.246351	0.33433	0	0	0	0	0	0.419319	0	0	NUCLEUS
P09429	HMGB1	0	1	0	0	0	0	0	0	0	0	0	CHROMATIN
P09488		0	0	1	0	0	0	0	0	0	0	0	CYTOSOL
P09496-2	CLTA	0	0	0.219777	0	0	0	0	0	0	0	0.780223	PLASMA MEMBRANE
P09497-2	CLTB	0	0	0.278079	0	0	0.721921	0	0	0	0	0	LYSOSOME
P09525	ANXA4	0	0	0.0873693	0	0	0	0	0	0	0	0.912631	PLASMA MEMBRANE
P09543		0	0	0	0	0.356255	0	0	0	0	0	0.643745	PLASMA MEMBRANE
P09601	HMOX1	0	0	0	0.614561	0.385439	0	0	0	0	0	0	ENDOPLASMIC RETICULUM
P09622	DLD	0	0	0	0	0	0	1	0	0	0	0	MITOCHONDRIA
P09661	SNRPA1	0	0	0.0949618	0	0	0	0	0	0.905038	0	0	NUCLEUS
P09668		0	0	0	0	0	1	0	0	0	0	0	LYSOSOME
P09669	COX6C	0	0	0	0	0	0	0.65065	0	0	0.34935	0	MITOCHONDRIA
P09769	FGR	0	0	0	0	0	0	0	0	0	0	1	PLASMA MEMBRANE
P09874	PARP1	0	1	0	0	0	0	0	0	0	0	0	CHROMATIN
P09914		0	0	1	0	0	0	0	0	0	0	0	CYTOSOL
P09917		0	0	0.717986	0	0	0	0	0	0.282014	0	0	CYTOSOL
P09958	FURIN	0	0	0	0	0	0	0	0	0	0	1	PLASMA MEMBRANE
P09972	ALDOC	0	0	1	0	0	0	0	0	0	0	0	CYTOSOL
P0C0S5	H2AFV	0	1	0	0	0	0	0	0	0	0	0	CHROMATIN
P0C7P0	CISD3	0	0	0	0	0	0	1	0	0	0	0	MITOCHONDRIA
P0CG12	CHTF8	0.513173	0.336601	0	0	0	0	0	0	0	0	0.150226	40S/60S RIBOSOME
P0DJ93		0.215899	0	0	0	0.284481	0	0	0	0	0	0.49962	PLASMA MEMBRANE
P0DMV9	HSPA1B	0	0	1	0	0	0	0	0	0	0	0	CYTOSOL
P10109	FDX1	0	0	0	0	0	0	1	0	0	0	0	MITOCHONDRIA
P10124	SRGN	0	0	0.0603333	0	0	0	0	0	0	0	0.939667	PLASMA MEMBRANE
P10153	RNASE2	0	0	0	0	0	0.51291	0	0	0	0	0.48709	LYSOSOME
P10155		0	0	1	0	0	0	0	0	0	0	0	CYTOSOL
P10253	GAA	0	0	0	0	0	0.901832	0	0	0	0	0.0981681	LYSOSOME
P10301	RRAS	0	0	0	0	0	0	0	0	0	0	1	PLASMA MEMBRANE
P10398	ARAF	0.172568	0	0.456435	0	0	0	0	0	0.221903	0	0.149094	CYTOSOL
P10412	HIST1H1E	0	1	0	0	0	0	0	0	0	0	0	CHROMATIN
P10415	BCL2	0	0	0	0	1	0	0	0	0	0	0	GOLGI APPARATUS
P10515	DLAT	0	0	0	0	0	0	1	0	0	0	0	MITOCHONDRIA
P10586	PTPRF	0	0	0	0	0	0	0	0	0	0	1	PLASMA MEMBRANE
P10599	TXN	0	0	1	0	0	0	0	0	0	0	0	CYTOSOL
P10606	COX5B	0	0	0	0	0	0	0.669283	0	0	0.330717	0	MITOCHONDRIA
P10619	CTSA	0	0	0	0.339626	0	0.660374	0	0	0	0	0	LYSOSOME
P10620	MGST1	0	0	0	0.702111	0	0	0.297889	0	0	0	0	ENDOPLASMIC RETICULUM
P10644	PRKAR1A	0	0	1	0	0	0	0	0	0	0	0	CYTOSOL
P10768	ESD	0	0	1	0	0	0	0	0	0	0	0	CYTOSOL
P10809	HSPD1	0	0	0	0	0	0	1	0	0	0	0	MITOCHONDRIA
P11021	HSPA5	0	0	0	0.508513	0	0.491487	0	0	0	0	0	ENDOPLASMIC RETICULUM
P11047	LAMC1	0	0	0	0.532991	0	0.467009	0	0	0	0	0	ENDOPLASMIC RETICULUM
P11049	CD37	0	0	0	0	0	0.356285	0	0	0	0	0.643715	PLASMA MEMBRANE
P11117	ACP2	0	0	0	0	0	1	0	0	0	0	0	LYSOSOME
P11142	HSPA8	0	0	1	0	0	0	0	0	0	0	0	CYTOSOL
P11166	SLC2A1	0	0	0	0	0	0	0	0	0	0	1	PLASMA MEMBRANE
P11169		0	0	0	0	0	0	0	0	0	0	1	PLASMA MEMBRANE
P11171	EPB41	0	0	0	0	0	0	0	0	0	0	1	PLASMA MEMBRANE
P11172	UMPS	0	0	0.593754	0	0	0	0	0	0.406246	0	0	CYTOSOL
P11177	PDHB	0	0	0	0	0	0	1	0	0	0	0	MITOCHONDRIA
P11182	DBT	0	0	0	0	0	0	1	0	0	0	0	MITOCHONDRIA
P11215-2	ITGAM	0	0	0	0	0	0	0	0	0	0	1	PLASMA MEMBRANE
P11233	RALA	0	0	0	0	0	0	0	0	0	0	1	PLASMA MEMBRANE
P11234-2	RALB	0	0	0	0	0	0	0	0	0	0	1	PLASMA MEMBRANE
P11274	BCR	0	0	0.0692184	0	0	0	0	0	0	0	0.930782	PLASMA MEMBRANE
P11279	LAMP1	0	0	0	0	0	0.689849	0	0	0	0	0.310151	LYSOSOME
P11310-2	ACADM	0	0	0	0	0	0	1	0	0	0	0	MITOCHONDRIA
P11387	TOP1.00	0	1	0	0	0	0	0	0	0	0	0	CHROMATIN
P11388-4	TOP2A	0	1	0	0	0	0	0	0	0	0	0	CHROMATIN
P11413-2	G6PD	0	0	1	0	0	0	0	0	0	0	0	CYTOSOL
P11498	PC	0	0	0	0	0	0	1	0	0	0	0	MITOCHONDRIA
P11586	MTHFD1	1	0	0	0	0	0	0	0	0	0	0	40S/60S RIBOSOME
P11717	IGF2R	0	0	0	0	0	0.839911	0	0	0	0	0.160089	LYSOSOME
P11766		0	0	1	0	0	0	0	0	0	0	0	CYTOSOL
P11908-2		0	0	0.768721	0	0	0	0	0	0.231279	0	0	CYTOSOL
P11940	PABPC3	0.265817	0	0.0667853	0	0	0	0	0	0.667398	0	0	NUCLEUS
P12004	PCNA	0	0	0.800994	0	0	0	0	0	0.199006	0	0	CYTOSOL
P12081	HARS	0	0	0.645354	0	0	0	0	0	0.354646	0	0	CYTOSOL
P12109	COL6A1	0	0	0	0.516772	0	0.483228	0	0	0	0	0	ENDOPLASMIC RETICULUM
P12235		0	0	0	0	0	0	1	0	0	0	0	MITOCHONDRIA
P12236	SLC25A6	0	0	0	0	0	0	0.707125	0	0	0.292875	0	MITOCHONDRIA
P12268	IMPDH2	0	0	0.536781	0	0	0	0	0	0.463219	0	0	CYTOSOL
P12270	TPR	0	0	0.454351	0	0	0	0	0	0.545649	0	0	NUCLEUS
P12314	FCGR1A	0	0	0	0	0	0.352071	0	0	0	0	0.647929	PLASMA MEMBRANE
P12318	FCGR2C	0	0	0	0	0	0	0	0	0	0	1	PLASMA MEMBRANE
P12694	BCKDHA	0	0	0	0	0	0	1	0	0	0	0	MITOCHONDRIA
P12814	ACTN1	0	0	0.743918	0	0	0	0	0	0	0	0.256082	CYTOSOL
P12931-2	SRC	0	0	0	0	0	0	0	0	0	0	1	PLASMA MEMBRANE
P12955		0	0	1	0	0	0	0	0	0	0	0	CYTOSOL
P12956	XRCC6	0	0	0.134564	0	0	0	0	0	0.865436	0	0	NUCLEUS
P13010	XRCC5	0	0	0.0977193	0	0	0	0	0	0.902281	0	0	NUCLEUS
P13073	COX4I1	0	0	0	0	0	0	1	0	0	0	0	MITOCHONDRIA
P13196	ALAS1	0	0	0	0	0	0	0.704894	0	0	0.295106	0	MITOCHONDRIA
P13284	IFI30	0	0	0	0	0	1	0	0	0	0	0	LYSOSOME
P13489	RNH1	0	0	1	0	0	0	0	0	0	0	0	CYTOSOL
P13498	CYBA	0	0	0	0	0.326131	0.393665	0	0	0	0	0.280205	LYSOSOME
P13501	CCL5	0	0	0	0	0.431693	0.275377	0	0	0	0	0.29293	GOLGI APPARATUS
P13612	ITGA4	0	0	0	0	0	0	0	0	0	0	1	PLASMA MEMBRANE
P13639	EEF2	0.286581	0	0.138076	0	0	0	0	0	0.575343	0	0	NUCLEUS
P13667	PDIA4	0	0	0	0.41689	0	0.58311	0	0	0	0	0	LYSOSOME
P13674	P4HA1	0	0	0.0570886	0	0	0	0	0	0	0	0.942911	PLASMA MEMBRANE
P13674-2	P4HA1	0	0	0.0555308	0	0	0	0	0	0	0	0.944469	PLASMA MEMBRANE
P13693	TPT1	0	0	0.747304	0	0	0	0	0	0.252696	0	0	CYTOSOL
P13747	HLA-E	0	0	0	0	0.38452	0.350678	0	0	0	0	0.264802	GOLGI APPARATUS
P13796	LCP1	0	0	1	0	0	0	0	0	0	0	0	CYTOSOL
P13797		0	0	1	0	0	0	0	0	0	0	0	CYTOSOL
P13798	APEH	0	0	0.902555	0	0	0	0	0	0	0	0.097445	CYTOSOL
P13804	ETFA	0	0	0	0	0	0	1	0	0	0	0	MITOCHONDRIA
P13807	GYS1	0.292528	0.707472	0	0	0	0	0	0	0	0	0	CHROMATIN
P13861	PRKAR2A	0	0	0.529137	0	0	0	0	0	0	0	0.470863	CYTOSOL
P13987	CD59	0	0	0	0	0	0	0	0	0	0	1	PLASMA MEMBRANE
P13995	MTHFD2	0	0	0	0	0	0	0.699268	0	0	0.300732	0	MITOCHONDRIA
P14174	MIF	0	0	0.548712	0	0	0	0	0	0	0	0.451288	CYTOSOL
P14207		0	0	0	0	0	0	0	0	0	0	1	PLASMA MEMBRANE
P14209	CD99	0	0	0.0485692	0	0	0	0	0	0	0	0.951431	PLASMA MEMBRANE
P14314	PRKCSH	0	0	0	0.429602	0	0.570398	0	0	0	0	0	LYSOSOME
P14317	HCLS1	0	0	0.768324	0	0	0	0	0	0	0	0.231676	CYTOSOL
P14324	FDPS	0	0	1	0	0	0	0	0	0	0	0	CYTOSOL
P14384	CPM	0	0	0	0	0	0.290138	0	0	0	0	0.709862	PLASMA MEMBRANE
P14543	NID1	0	0	0	0	0.252997	0.318526	0	0	0	0	0.428477	PLASMA MEMBRANE
P14550	AKR1A1	0	0	1	0	0	0	0	0	0	0	0	CYTOSOL
P14598		0.295724	0	0.272786	0	0	0	0	0	0.431491	0	0	NUCLEUS
P14618	PKM	0	0	0.660201	0	0	0	0	0	0.339799	0	0	CYTOSOL
P14618-2		0	0	0.66551	0	0	0	0	0	0.334489	0	0	CYTOSOL
P14621		0	0	0.134054	0	0	0	0.865946	0	0	0	0	MITOCHONDRIA
P14625	HSP90B1	0	0	0	0.515899	0	0.484101	0	0	0	0	0	ENDOPLASMIC RETICULUM
P14678-3	SNRPB	0	0	0.0488908	0	0	0	0	0	0.951109	0	0	NUCLEUS
P14735	IDE	0	0	0.69677	0	0	0	0	0	0.30323	0	0	CYTOSOL
P14854	COX6B1	0	0	0	0	0	0	0.608335	0	0	0.391665	0	MITOCHONDRIA
P14866	HNRNPL	0	0.252158	0	0	0	0	0	0.325351	0.422491	0	0	NUCLEUS
P14868	DARS	0	0	0.61896	0	0	0	0	0	0.38104	0	0	CYTOSOL
P14923	JUP	0	0	0	0	0	0	0	0	0	0	1	PLASMA MEMBRANE
P14927	UQCRB	0	0	0	0	0	0	0.708374	0	0	0.291626	0	MITOCHONDRIA
P15121	AKR1B1	0	0	1	0	0	0	0	0	0	0	0	CYTOSOL
P15144	ANPEP	0	0	0	0	0	0	0	0	0	0	1	PLASMA MEMBRANE
P15151	PVR	0	0	0	0	0	0	0	0	0	0	1	PLASMA MEMBRANE
P15153	RAC2	0	0	0.396025	0	0	0	0	0	0	0	0.603975	PLASMA MEMBRANE
P15170-3	GSPT1	0	0	1	0	0	0	0	0	0	0	0	CYTOSOL
P15289	ARSA	0	0	0	0	0	1	0	0	0	0	0	LYSOSOME
P15291		0	0	0	0	0.250203	0.374945	0	0	0	0	0.374852	LYSOSOME
P15311	EZR	0	0	0	0	0	0	0	0	0	0	1	PLASMA MEMBRANE
P15498	VAV1	0	0	0.685575	0	0	0	0	0	0.314425	0	0	CYTOSOL
P15509-7	CSF2RA	0	0	0	0	0	0.311932	0	0	0	0	0.688068	PLASMA MEMBRANE
P15529-3	CD46	0	0	0	0	0	0	0	0	0	0	1	PLASMA MEMBRANE
P15559	NQO1	0.174472	0	0.40608	0	0	0	0	0	0.419448	0	0	NUCLEUS
P15586	GNS	0	0	0	0	0	0.846926	0	0	0	0	0.153074	LYSOSOME
P15848	ARSB	0	0	0	0	0	1	0	0	0	0	0	LYSOSOME
P15880	RPS2	1	0	0	0	0	0	0	0	0	0	0	40S/60S RIBOSOME
P15927		0	0	0.305298	0	0	0	0	0	0.694702	0	0	NUCLEUS
P15954	COX7C	0	0	0	0	0	0	0.576912	0	0	0.423088	0	MITOCHONDRIA
P16070	CD44	0	0	0	0	0	0	0	0	0	0	1	PLASMA MEMBRANE
P16104	H2AFX	0	1	0	0	0	0	0	0	0	0	0	CHROMATIN
P16150	SPN	0	0	0	0	0	0	0	0	0	0	1	PLASMA MEMBRANE
P16152	CBR1	0	0	1	0	0	0	0	0	0	0	0	CYTOSOL
P16219	ACADS	0	0	0	0	0	0	1	0	0	0	0	MITOCHONDRIA
P16220		0	0.559332	0.0644038	0	0	0	0	0	0.376265	0	0	CHROMATIN
P16260		0	0	0	0	0	0	0.728306	0	0	0.271693	0	MITOCHONDRIA
P16278	GLB1	0	0	0	0.302289	0	0.697711	0	0	0	0	0	LYSOSOME
P16284	PECAM1	0	0	0	0	0	0	0	0	0	0	1	PLASMA MEMBRANE
P16333	NCK1	0	0	0.739855	0	0	0	0	0	0	0	0.260145	CYTOSOL
P16401	HIST1H1B	0	1	0	0	0	0	0	0	0	0	0	CHROMATIN
P16402	HIST1H1D	0	1	0	0	0	0	0	0	0	0	0	CHROMATIN
P16403	HIST1H1C	0	1	0	0	0	0	0	0	0	0	0	CHROMATIN
P16435	POR	0	0	0	0.42609	0.226618	0.347292	0	0	0	0	0	ENDOPLASMIC RETICULUM
P16455	MGMT	0.256254	0.563956	0.17979	0	0	0	0	0	0	0	0	CHROMATIN
P16615	ATP2A2	0	0	0	0.631951	0.368049	0	0	0	0	0	0	ENDOPLASMIC RETICULUM
P16671		0	0	0	0	0	0.393383	0	0	0	0	0.606617	PLASMA MEMBRANE
P16885	PLCG2	0	0	1	0	0	0	0	0	0	0	0	CYTOSOL
P16930	FAH	0	0	1	0	0	0	0	0	0	0	0	CYTOSOL
P16949	STMN1	0	0	1	0	0	0	0	0	0	0	0	CYTOSOL
P17050	NAGA	0	0	0	0	0	1	0	0	0	0	0	LYSOSOME
P17096		0	1	0	0	0	0	0	0	0	0	0	CHROMATIN
P17152	TMEM11	0	0	0	0	0	0	0.733314	0	0	0.266686	0	MITOCHONDRIA
P17252	PRKCA	0	0	0.589127	0	0	0	0	0	0	0	0.410873	CYTOSOL
P17480	UBTF	0	1	0	0	0	0	0	0	0	0	0	CHROMATIN
P17568	NDUFB7	0	0	0	0	0	0	0.555965	0	0	0.444035	0	MITOCHONDRIA
P17655	CAPN2	0	0	1	0	0	0	0	0	0	0	0	CYTOSOL
P17706	PTPN2	0	0	0.131206	0.514175	0.354619	0	0	0	0	0	0	ENDOPLASMIC RETICULUM
P17812	CTPS1	0	0	1	0	0	0	0	0	0	0	0	CYTOSOL
P17813	ENG	0	0	0	0	0	0	0	0	0	0	1	PLASMA MEMBRANE
P17844	DDX5	0.308086	0	0	0	0	0	0	0.344332	0.347582	0	0	NUCLEUS
P17858	PFKL	0	0	0.417376	0	0	0	0	0	0.582624	0	0	NUCLEUS
P17900		0	0	0	0.349877	0	0.650123	0	0	0	0	0	LYSOSOME
P17931	LGALS3	0	0	0	0	0	0	0	0	0	0	1	PLASMA MEMBRANE
P17936-2		0	0	0	0	0.250072	0	0	0	0	0	0.749928	PLASMA MEMBRANE
P17980	PSMC3	0	0	0.689926	0	0	0	0	0	0.310074	0	0	CYTOSOL
P17987	TCP1	0	0	0.808645	0	0	0	0	0	0.191355	0	0	CYTOSOL
P18031	PTPN1	0	0	0	1	0	0	0	0	0	0	0	ENDOPLASMIC RETICULUM
P18077	RPL35A	1	0	0	0	0	0	0	0	0	0	0	40S/60S RIBOSOME
P18084	ITGB5	0	0	0	0	0	0	0	0	0	0	1	PLASMA MEMBRANE
P18085		0	0	0.601291	0	0	0	0	0	0.398709	0	0	CYTOSOL
P18124	RPL7	1	0	0	0	0	0	0	0	0	0	0	40S/60S RIBOSOME
P18206	VCL	0	0	1	0	0	0	0	0	0	0	0	CYTOSOL
P18433	PTPRA	0	0	0	0	0	0	0	0	0	0	1	PLASMA MEMBRANE
P18615-3	NELFE	0	0	0.231245	0	0	0	0	0	0.768755	0	0	NUCLEUS
P18621-3	RPL17	1	0	0	0	0	0	0	0	0	0	0	40S/60S RIBOSOME
P18669	PGAM4	0	0	1	0	0	0	0	0	0	0	0	CYTOSOL
P18754-2	RCC1	0	1	0	0	0	0	0	0	0	0	0	CHROMATIN
P18850	ATF6	0.239015	0	0	0	0.600794	0	0	0	0	0	0.16019	GOLGI APPARATUS
P18859-2	ATP5J	0	0	0	0	0	0	0.698903	0	0	0.301097	0	MITOCHONDRIA
P18887		0	0.337614	0.129021	0	0	0	0	0	0.533365	0	0	NUCLEUS
P19256		0	0	0	0	0	0.440752	0	0	0	0	0.559248	PLASMA MEMBRANE
P19338	NCL	0	0	0.605405	0	0	0	0	0	0.394595	0	0	CYTOSOL
P19367		0	0.365885	0	0	0	0	0.634115	0	0	0	0	MITOCHONDRIA
P19388	POLR2E	0	0.197944	0.0723464	0	0	0	0	0	0.72971	0	0	NUCLEUS
P19397		0	0	0	0	0	0	0	0	0	0	1	PLASMA MEMBRANE
P19404	NDUFV2	0	0	0	0	0	0	0.684039	0	0	0.315961	0	MITOCHONDRIA
P19440	GGT2	0	0	0	0	0	0	0	0	0	0	1	PLASMA MEMBRANE
P19474	TRIM21	0	0	1	0	0	0	0	0	0	0	0	CYTOSOL
P19525	EIF2AK2	0.604003	0	0	0	0	0	0	0	0.395997	0	0	40S/60S RIBOSOME
P19532	TFE3	0.214401	0.526297	0.102436	0	0	0	0	0	0	0	0.156865	CHROMATIN
P19623	SRM	0	0	1	0	0	0	0	0	0	0	0	CYTOSOL
P19634	SLC9A1	0	0	0	0	0	0.459414	0	0	0	0	0.540586	PLASMA MEMBRANE
P19784		0	0	1	0	0	0	0	0	0	0	0	CYTOSOL
P19801-2	AOC1	0	0	0	0	0.615567	0	0	0	0	0	0.384433	GOLGI APPARATUS
P19838-2	NFKB1	0	0	0.591604	0	0	0	0	0	0.408396	0	0	CYTOSOL
P19878	NCF2	0	0	0.786851	0	0	0	0	0	0	0	0.213149	CYTOSOL
P19971	TYMP	0	0	0.853744	0	0	0	0	0	0	0	0.146256	CYTOSOL
P20020	ATP2B1	0	0	0	0	0	0	0	0	0	0	1	PLASMA MEMBRANE
P20042	EIF2S2	0	0.285006	0.0582251	0	0	0	0	0	0.656768	0	0	NUCLEUS
P20073	ANXA7	0	0	0.81825	0	0	0	0	0	0	0	0.18175	CYTOSOL
P20138	CD33	0	0	0	0	0	0	0	0	0	0	1	PLASMA MEMBRANE
P20160	AZU1	0	0	0	0	0.39119	0	0	0	0	0	0.60881	PLASMA MEMBRANE
P20290	BTF3	0.210021	0	0	0	0	0	0	0.565116	0	0	0.224864	NUCLEOLUS
P20333	TNFRSF1B	0	0	0	0	0	0	0	0	0	0	1	PLASMA MEMBRANE
P20338	RAB4A	0	0	0.0698699	0.344565	0	0.585566	0	0	0	0	0	LYSOSOME
P20339	RAB5A	0	0	0	0	0.547134	0.452866	0	0	0	0	0	GOLGI APPARATUS
P20340		0	0	0	0	0.254279	0	0	0	0	0	0.745721	PLASMA MEMBRANE
P20585	MSH3	0	1	0	0	0	0	0	0	0	0	0	CHROMATIN
P20591	MX1	0	0	0.751607	0	0	0	0	0	0.248393	0	0	CYTOSOL
P20592	MX2	0.605837	0	0	0	0	0	0	0	0.394163	0	0	40S/60S RIBOSOME
P20618	PSMB1	0	0	1	0	0	0	0	0	0	0	0	CYTOSOL
P20645	M6PR	0	0	0	0	0	1	0	0	0	0	0	LYSOSOME
P20674	COX5A	0	0	0	0	0	0	0.620987	0	0	0.379013	0	MITOCHONDRIA
P20700	LMNB1	0	0.657524	0	0	0	0	0.342476	0	0	0	0	CHROMATIN
P20701-2	ITGAL	0	0	0	0	0	0	0	0	0	0	1	PLASMA MEMBRANE
P20702	ITGAX	0	0	0	0	0	0.347905	0	0	0	0	0.652095	PLASMA MEMBRANE
P20810-6		0	0	0.735367	0	0	0	0	0	0.264633	0	0	CYTOSOL
P20839-6	IMPDH1	0	0	0.650759	0	0	0	0	0	0.349241	0	0	CYTOSOL
P20933	AGA	0	0	0	0	0.296402	0.292573	0	0	0	0	0.411025	PLASMA MEMBRANE
P21266		0	0	1	0	0	0	0	0	0	0	0	CYTOSOL
P21281	ATP6V1B2	0	0	0.505343	0	0	0	0	0	0	0	0.494657	CYTOSOL
P21283	ATP6V1C1	0.319097	0	0.680903	0	0	0	0	0	0	0	0	CYTOSOL
P21291	CSRP1	0	0	0.1655	0	0	0	0	0	0	0	0.8345	PLASMA MEMBRANE
P21359	NF1	0	0	0	0	0	0	0	0	0	0	1	PLASMA MEMBRANE
P21580		0	0	0	0	0	0	0	0	0	0	1	PLASMA MEMBRANE
P21589		0	0	0	0	0	0	0	0	0	0	1	PLASMA MEMBRANE
P21730		0	0	0	0	0	0	0	0	0	0	1	PLASMA MEMBRANE
P21796	VDAC1	0	0	0	0	0	0	0.724379	0	0	0.275621	0	MITOCHONDRIA
P21912	SDHB	0	0	0	0	0	0	1	0	0	0	0	MITOCHONDRIA
P21926		0	0	0	0	0	0	0	0	0	0	1	PLASMA MEMBRANE
P21953	BCKDHB	0	0	0	0	0	0	1	0	0	0	0	MITOCHONDRIA
P21964	COMT	0	0	0	1	0	0	0	0	0	0	0	ENDOPLASMIC RETICULUM
P22033	MUT	0	0	0	0	0	0	1	0	0	0	0	MITOCHONDRIA
P22059	OSBP	0	0	0.0796788	0.340579	0.242071	0.337672	0	0	0	0	0	ENDOPLASMIC RETICULUM
P22061-2	PCMT1	0	0	1	0	0	0	0	0	0	0	0	CYTOSOL
P22083	FUT4	0	0	0	0.400133	0.599867	0	0	0	0	0	0	GOLGI APPARATUS
P22087	FBL	0	0	0	0	0	0	0	0.81653	0.18347	0	0	NUCLEOLUS
P22090	RPS4Y1	0.634582	0	0	0.365418	0	0	0	0	0	0	0	40S/60S RIBOSOME
P22102	GART	0	0	0.792421	0	0	0	0	0	0.207579	0	0	CYTOSOL
P22234-2	PAICS	0	0	1	0	0	0	0	0	0	0	0	CYTOSOL
P22307	SCP2	0	0	0	0	0	0	0.405935	0	0	0.594065	0	PEROXISOME
P22392-2	NME2P1	0	0	1	0	0	0	0	0	0	0	0	CYTOSOL
P22570-7		0	0	0	0	0	0	1	0	0	0	0	MITOCHONDRIA
P22626	HNRNPA2B1	0	0.169253	0	0	0	0	0	0	0.830747	0	0	NUCLEUS
P22681	CBL	0	0	0.768258	0	0	0	0	0	0	0	0.231742	CYTOSOL
P22692	IGFBP4	0	0	0	0	0.547119	0	0	0	0	0	0.452881	GOLGI APPARATUS
P22695	UQCRC2	0	0	0	0	0	0	0.729575	0	0	0.270425	0	MITOCHONDRIA
P22732	SLC2A5	0	0	0	0	0	0	0	0	0	0	1	PLASMA MEMBRANE
P22794-2	EVI2A	0	0	0.066679	0	0	0	0	0	0	0	0.933321	PLASMA MEMBRANE
P22830-2	FECH	0	0	0	0	0	0	1	0	0	0	0	MITOCHONDRIA
P23141-2	CES1	0	0	0	0.427491	0	0.572509	0	0	0	0	0	LYSOSOME
P23193	TCEA1	0	0	0.278926	0	0	0	0	0	0.721074	0	0	NUCLEUS
P23219-5	PTGS1	0	0	0	0.589827	0.410173	0	0	0	0	0	0	ENDOPLASMIC RETICULUM
P23246	SFPQ	0.248086	0	0	0	0	0	0	0.43957	0.312344	0	0	NUCLEOLUS
P23258	TUBG1	0.3459	0	0	0	0	0	0	0.378165	0.275935	0	0	NUCLEOLUS
P23284	PPIB	0	0	0	0.640604	0	0.359396	0	0	0	0	0	ENDOPLASMIC RETICULUM
P23368	ME2	0	0	0	0	0	0	1	0	0	0	0	MITOCHONDRIA
P23381	WARS	0	0	1	0	0	0	0	0	0	0	0	CYTOSOL
P23396	RPS3	1	0	0	0	0	0	0	0	0	0	0	40S/60S RIBOSOME
P23434	GCSH	0	0	0	0	0	0	1	0	0	0	0	MITOCHONDRIA
P23458	JAK1	0	0	0	0	0	0	0	0	0	0	1	PLASMA MEMBRANE
P23469	PTPRE	0	0	0.620562	0	0	0	0	0	0	0	0.379438	CYTOSOL
P23470		0	0	0	0	0	0	0	0	0	0	1	PLASMA MEMBRANE
P23526	AHCY	0	0	1	0	0	0	0	0	0	0	0	CYTOSOL
P23528	CFL1	0	0	1	0	0	0	0	0	0	0	0	CYTOSOL
P23588	EIF4B	0	0	0.424344	0	0	0	0	0	0.575656	0	0	NUCLEUS
P23634	ATP2B4	0	0	0	0	0	0	0	0	0	0	1	PLASMA MEMBRANE
P23786	CPT2	0	0	0	0	0	0	1	0	0	0	0	MITOCHONDRIA
P23919	DTYMK	0	0	0.260462	0	0	0	0.29063	0	0.448909	0	0	NUCLEUS
P23921	RRM1	0	0	0.528248	0	0	0	0	0	0.471752	0	0	CYTOSOL
P24534	EEF1B2	0	0	1	0	0	0	0	0	0	0	0	CYTOSOL
P24539	ATP5F1	0	0	0	0	0	0	1	0	0	0	0	MITOCHONDRIA
P24557-3	TBXAS1	0	0	0	0.452058	0.226841	0.321101	0	0	0	0	0	ENDOPLASMIC RETICULUM
P24666	ACP1	0	0	1	0	0	0	0	0	0	0	0	CYTOSOL
P24752	ACAT1	0	0	0	0	0	0	1	0	0	0	0	MITOCHONDRIA
P24844	MYL9	0	0	0.792009	0	0	0	0.207991	0	0	0	0	CYTOSOL
P24928	POLR2A	0	0	0.130265	0	0	0	0	0	0.869735	0	0	NUCLEUS
P24941	CDK2	0	0.279879	0.25536	0	0	0	0	0	0.464761	0	0	NUCLEUS
P25098	GRK2	0	0	0.684399	0	0	0	0	0	0.315601	0	0	CYTOSOL
P25205-2	MCM3	0	0	0.364803	0	0	0	0	0	0.635197	0	0	NUCLEUS
P25325-2	MPST	0	0	1	0	0	0	0	0	0	0	0	CYTOSOL
P25398	RPS12	0.727562	0	0	0	0	0	0	0	0.272438	0	0	40S/60S RIBOSOME
P25490	YY1	0.206029	0.793971	0	0	0	0	0	0	0	0	0	CHROMATIN
P25685	DNAJB1	0.205264	0.242768	0.135515	0	0	0	0	0	0.416453	0	0	NUCLEUS
P25686	DNAJB2	0	0	0.117564	0	0.607241	0	0	0	0	0	0.275195	GOLGI APPARATUS
P25705	ATP5A1	0	0	0	0	0	0	1	0	0	0	0	MITOCHONDRIA
P25774	CTSS	0	0	0	0	0	0.899333	0	0	0	0	0.100667	LYSOSOME
P25786-2	PSMA1	0	0	1	0	0	0	0	0	0	0	0	CYTOSOL
P25787	PSMA2	0	0	1	0	0	0	0	0	0	0	0	CYTOSOL
P25788	PSMA3	0	0	1	0	0	0	0	0	0	0	0	CYTOSOL
P25789	PSMA4	0	0	1	0	0	0	0	0	0	0	0	CYTOSOL
P25942	CD40	0	0	0	0	0	0	0	0	0	0	1	PLASMA MEMBRANE
P26010	ITGB7	0	0	0	0	0	0	0	0	0	0	1	PLASMA MEMBRANE
P26022		0	0	0	0	0.400216	0.463953	0	0	0	0	0.135832	LYSOSOME
P26038	MSN	0	0	0.145269	0	0	0	0	0	0	0	0.854731	PLASMA MEMBRANE
P26196	DDX6	0.423021	0	0	0	0	0	0	0	0.576979	0	0	NUCLEUS
P26368	U2AF2	0	0	0.101819	0	0	0	0	0	0.898181	0	0	NUCLEUS
P26373	RPL13	1	0	0	0	0	0	0	0	0	0	0	40S/60S RIBOSOME
P26440	IVD	0	0	0	0	0	0	1	0	0	0	0	MITOCHONDRIA
P26447	S100A4	0	0	1	0	0	0	0	0	0	0	0	CYTOSOL
P26572	MGAT1	0	0	0	0.402431	0.597569	0	0	0	0	0	0	GOLGI APPARATUS
P26583	HMGB2	0	1	0	0	0	0	0	0	0	0	0	CHROMATIN
P26599-3	PTBP1	0	0	0.120144	0	0	0	0	0	0.879856	0	0	NUCLEUS
P26639	TARS	0	0	0.763483	0	0	0	0	0	0.236517	0	0	CYTOSOL
P26640	VARS	0	0	0.738485	0	0	0	0	0	0.261515	0	0	CYTOSOL
P26641-2		0	0	0.709163	0	0	0	0	0	0.290837	0	0	CYTOSOL
P26885	FKBP2	0.155169	0	0	0.314954	0.217193	0.312684	0	0	0	0	0	ENDOPLASMIC RETICULUM
P26951		0	0	0.0853722	0	0	0	0	0	0	0	0.914628	PLASMA MEMBRANE
P27105	STOM	0	0	0	0	0	0	0	0	0	0	1	PLASMA MEMBRANE
P27144	AK4	0	0	0	0	0	0	1	0	0	0	0	MITOCHONDRIA
P27348	YWHAQ	0	0	1	0	0	0	0	0	0	0	0	CYTOSOL
P27361	MAPK3	0	0	1	0	0	0	0	0	0	0	0	CYTOSOL
P27448	MARK3	0.349987	0	0.105444	0	0	0	0	0	0	0	0.544569	PLASMA MEMBRANE
P27449	ATP6V0C	0	0	0	0	0	1	0	0	0	0	0	LYSOSOME
P27540	ARNT	0	0.189828	0.196914	0	0	0	0	0	0.613257	0	0	NUCLEUS
P27544-2		0	0	0	0	0.588987	0	0	0	0	0	0.411013	GOLGI APPARATUS
P27635	RPL10	1	0	0	0	0	0	0	0	0	0	0	40S/60S RIBOSOME
P27694	RPA1	0	0	0.41581	0	0	0	0	0	0.58419	0	0	NUCLEUS
P27695	APEX1	0	0.23332	0.122921	0	0	0	0	0	0.643759	0	0	NUCLEUS
P27701	CD82	0	0	0	0	0	0.405268	0	0	0	0	0.594732	PLASMA MEMBRANE
P27707	DCK	0	0	1	0	0	0	0	0	0	0	0	CYTOSOL
P27708	CAD	0	0	0.550644	0	0	0	0	0	0.449356	0	0	CYTOSOL
P27797	CALR	0	0	0	0.520889	0	0.479111	0	0	0	0	0	ENDOPLASMIC RETICULUM
P27816	MAP4	1	0	0	0	0	0	0	0	0	0	0	40S/60S RIBOSOME
P27824-2	CANX	0	0	0	0.450814	0.28427	0.264917	0	0	0	0	0	ENDOPLASMIC RETICULUM
P27918	CFP	0.230806	0	0	0	0.376585	0	0	0	0	0	0.392609	PLASMA MEMBRANE
P27986	PIK3R1	0.242625	0.189964	0.133789	0	0	0	0	0	0.345512	0	0.0881101	NUCLEUS
P28062	PSMB8	0	0	1	0	0	0	0	0	0	0	0	CYTOSOL
P28065	PSMB9	0	0	1	0	0	0	0	0	0	0	0	CYTOSOL
P28066	PSMA5	0	0	1	0	0	0	0	0	0	0	0	CYTOSOL
P28070	PSMB4	0	0	1	0	0	0	0	0	0	0	0	CYTOSOL
P28288	ABCD3	0	0	0	0	0	0	0.445911	0	0	0.554089	0	PEROXISOME
P28290	SSFA2	0	0	0	1	0	0	0	0	0	0	0	ENDOPLASMIC RETICULUM
P28331-2	NDUFS1	0	0	0	0	0	0	1	0	0	0	0	MITOCHONDRIA
P28340	POLD1	0	0	0.497807	0	0	0	0	0	0.502193	0	0	NUCLEUS
P28482	MAPK1	0	0	0.744811	0	0	0	0	0	0.255189	0	0	CYTOSOL
P28799	GRN	0	0	0	0	0	0.863103	0	0	0	0	0.136897	LYSOSOME
P28907	CD38	0	0	0	0	0	0	0	0	0	0	1	PLASMA MEMBRANE
P29144	TPP2	0	0	0.0441173	0	0	0	0	0.562751	0.393132	0	0	NUCLEOLUS
P29218-3	IMPA1	0	0	1	0	0	0	0	0	0	0	0	CYTOSOL
P29323		0	0	0	0	0	0	0	0	0	0	1	PLASMA MEMBRANE
P29350		0.198505	0	0.440142	0	0	0	0	0	0.361353	0	0	CYTOSOL
P29353-6	SHC1	0.224599	0	0.305059	0	0.356753	0	0	0	0	0	0.113589	GOLGI APPARATUS
P29372	MPG	0	1	0	0	0	0	0	0	0	0	0	CHROMATIN
P29401		0	0	0.674158	0	0	0	0	0	0.325842	0	0	CYTOSOL
P29466	CASP1	0	0	1	0	0	0	0	0	0	0	0	CYTOSOL
P29558		0	0.183428	0.224873	0	0	0	0	0	0.591699	0	0	NUCLEUS
P29597	TYK2	0	0	0	0	0	0	0	0	0	0	1	PLASMA MEMBRANE
P29728		0	0	0	0	0	0	0	0	0	0	1	PLASMA MEMBRANE
P29762	CRABP1	0	0	1	0	0	0	0	0	0	0	0	CYTOSOL
P29992		0	0	0	0	0	0	0	0	0	0	1	PLASMA MEMBRANE
P30038	ALDH4A1	0	0	0	0	0	0	1	0	0	0	0	MITOCHONDRIA
P30040	ERP29	0	0	0	0.468986	0	0.531014	0	0	0	0	0	LYSOSOME
P30041	PRDX6	0	0	1	0	0	0	0	0	0	0	0	CYTOSOL
P30042	C21orf33	0	0	0	0	0	0	1	0	0	0	0	MITOCHONDRIA
P30043	BLVRB	0	0	1	0	0	0	0	0	0	0	0	CYTOSOL
P30044-2		0	0.265278	0.222167	0	0	0	0.512555	0	0	0	0	MITOCHONDRIA
P30048	PRDX3	0	0	0	0	0	0	1	0	0	0	0	MITOCHONDRIA
P30049	ATP5D	0	0	0	0	0	0	1	0	0	0	0	MITOCHONDRIA
P30050	RPL12	1	0	0	0	0	0	0	0	0	0	0	40S/60S RIBOSOME
P30084	ECHS1	0	0	0	0	0	0	1	0	0	0	0	MITOCHONDRIA
P30085	CMPK1	0	0	1	0	0	0	0	0	0	0	0	CYTOSOL
P30086	PEBP1	0	0	1	0	0	0	0	0	0	0	0	CYTOSOL
P30101	PDIA3	0	0	0	0.307704	0.221727	0.470569	0	0	0	0	0	LYSOSOME
P30153	PPP2R1A	0	0	1	0	0	0	0	0	0	0	0	CYTOSOL
P30154-2		0	0	1	0	0	0	0	0	0	0	0	CYTOSOL
P30273	FCER1G	0	0	0	0	0	0	0	0	0	0	1	PLASMA MEMBRANE
P30405	PPIF	0	0	0	0	0	0	0.69475	0	0	0.30525	0	MITOCHONDRIA
P30419	NMT1	0.31764	0	0	0	0	0	0	0	0.68236	0	0	NUCLEUS
P30511-3	HLA-F	0	0	0	0	0	0.694563	0	0	0	0	0.305437	LYSOSOME
P30519	HMOX2	0	0	0	0.355838	0.3107	0.333463	0	0	0	0	0	ENDOPLASMIC RETICULUM
P30520	ADSS	0	0	1	0	0	0	0	0	0	0	0	CYTOSOL
P30530	AXL	0	0	0	0	0	0	0	0	0	0	1	PLASMA MEMBRANE
P30533	LRPAP1	0	0	0	0.526939	0	0.473061	0	0	0	0	0	ENDOPLASMIC RETICULUM
P30566	ADSL	0.23937	0	0.515064	0	0	0	0	0	0.245567	0	0	CYTOSOL
P30626	SRI	0	0	1	0	0	0	0	0	0	0	0	CYTOSOL
P30679		0	0	0	0	0	0	0	0	0	0	1	PLASMA MEMBRANE
P30740	SERPINB1	0	0	1	0	0	0	0	0	0	0	0	CYTOSOL
P30825		0	0	0	0	0	0	0	0	0	0	1	PLASMA MEMBRANE
P30837	ALDH1B1	0	0	0	0	0	0	0.731992	0	0	0.268008	0	MITOCHONDRIA
P30876	POLR2B	0	0	0.371808	0	0	0	0	0	0.628192	0	0	NUCLEUS
P31040	SDHA	0	0	0	0	0	0	1	0	0	0	0	MITOCHONDRIA
P31146	CORO1A	0	0	0.839211	0	0	0	0	0	0	0	0.160789	CYTOSOL
P31150		0	0	1	0	0	0	0	0	0	0	0	CYTOSOL
P31153	MAT2A	0	0	1	0	0	0	0	0	0	0	0	CYTOSOL
P31323	PRKAR2B	0	0	0.61493	0	0	0	0	0	0	0	0.38507	CYTOSOL
P31689	DNAJA1	0.171916	0.210466	0.321031	0	0	0	0	0	0.296586	0	0	CYTOSOL
P31930	UQCRC1	0	0	0	0	0	0	0.687817	0	0	0.312183	0	MITOCHONDRIA
P31937	HIBADH	0	0	0	0	0	0	1	0	0	0	0	MITOCHONDRIA
P31939	ATIC	0	0	1	0	0	0	0	0	0	0	0	CYTOSOL
P31942		0	0.260862	0	0	0	0	0	0	0.739138	0	0	NUCLEUS
P31943	HNRNPH1	0	0.19688	0.349095	0	0	0	0	0	0.454025	0	0	NUCLEUS
P31946	YWHAB	0	0	1	0	0	0	0	0	0	0	0	CYTOSOL
P31948-2	STIP1	0	0	1	0	0	0	0	0	0	0	0	CYTOSOL
P31949	S100A11	0	0	1	0	0	0	0	0	0	0	0	CYTOSOL
P32119	PRDX2	0	0	1	0	0	0	0	0	0	0	0	CYTOSOL
P32121-4		0	0	0	0	0	0.499007	0	0	0	0	0.500993	PLASMA MEMBRANE
P32189	GK3P	0	0	0	0	0	0	1	0	0	0	0	MITOCHONDRIA
P32246	CCR1	0	0	0	0	0	0	0	0	0	0	1	PLASMA MEMBRANE
P32322-3	PYCR1	0	0	0	0	0	0	0.699732	0	0	0.300268	0	MITOCHONDRIA
P32519	ELF1	0	1	0	0	0	0	0	0	0	0	0	CHROMATIN
P32942	ICAM3	0	0	0	0	0	0	0	0	0	0	1	PLASMA MEMBRANE
P32969	RPL9	1	0	0	0	0	0	0	0	0	0	0	40S/60S RIBOSOME
P32970	CD70	0	0	0	0	0	0	0	0	0	0	1	PLASMA MEMBRANE
P33121	ACSL1	0	0	0	0.625362	0.374639	0	0	0	0	0	0	ENDOPLASMIC RETICULUM
P33176	KIF5B	0	0	0.563368	0	0	0	0	0	0.436632	0	0	CYTOSOL
P33240		0	0	0	0	0	0	0	0.346636	0.653364	0	0	NUCLEUS
P33241-3	LSP1	0	0	0.354061	0	0	0	0	0	0	0	0.645939	PLASMA MEMBRANE
P33316		0	0	0	0	0	0	0.655348	0	0	0.344652	0	MITOCHONDRIA
P33527	ABCC1	0	0	0	0	0	0.26478	0	0	0	0	0.73522	PLASMA MEMBRANE
P33897	ABCD1	0	0	0	0	0	0	0.349347	0	0	0.650653	0	PEROXISOME
P33908	MAN1A1	0	0	0	0.485959	0.514041	0	0	0	0	0	0	GOLGI APPARATUS
P33991	MCM4	0	0	0.389406	0	0	0	0	0	0.610594	0	0	NUCLEUS
P33992	MCM5	0	0	0.24764	0	0	0	0	0	0.75236	0	0	NUCLEUS
P33993	MCM7	0	0	0.516639	0	0	0	0	0	0.483361	0	0	CYTOSOL
P34059	GALNS	0	0	0	0	0	0.837499	0	0	0	0	0.162501	LYSOSOME
P34820	BMP8B	0	0	0	0.440815	0.272787	0.286397	0	0	0	0	0	ENDOPLASMIC RETICULUM
P34897	SHMT2	0	0	0	0	0	0	1	0	0	0	0	MITOCHONDRIA
P34910-2	EVI2B	0	0	0	0	0	0.281616	0	0	0	0	0.718384	PLASMA MEMBRANE
P34913	EPHX2	0	0	0.769085	0	0	0	0	0	0.230915	0	0	CYTOSOL
P34932	HSPA4	0	0	1	0	0	0	0	0	0	0	0	CYTOSOL
P35221-2	CTNNA1	0	0	0.0735329	0	0	0	0	0	0	0	0.926467	PLASMA MEMBRANE
P35222	CTNNB1	0	0	0	0	0	0	0	0	0	0	1	PLASMA MEMBRANE
P35226	BMI1	0	0.534502	0.115941	0	0	0	0	0	0.349557	0	0	CHROMATIN
P35232	PHB	0	0	0	0	0	0	1	0	0	0	0	MITOCHONDRIA
P35236-3	PTPN7	0	0	1	0	0	0	0	0	0	0	0	CYTOSOL
P35240	NF2	0	0	0	0	0	0	0	0	0	0	1	PLASMA MEMBRANE
P35241	RDX	0	0	0.279454	0	0	0	0	0	0	0	0.720546	PLASMA MEMBRANE
P35249	RFC4	0	0.415723	0.0492076	0	0	0	0	0	0.535069	0	0	NUCLEUS
P35250	RFC2	0	0.532784	0	0	0	0	0	0	0.467216	0	0	CHROMATIN
P35251	RFC1	0	1	0	0	0	0	0	0	0	0	0	CHROMATIN
P35268	RPL22	1	0	0	0	0	0	0	0	0	0	0	40S/60S RIBOSOME
P35269	GTF2F1	0	0.241841	0.109982	0	0	0	0	0	0.648177	0	0	NUCLEUS
P35270	SPR	0	0	1	0	0	0	0	0	0	0	0	CYTOSOL
P35408	PTGER4	0	0	0	0	0	0	0	0	0	0	1	PLASMA MEMBRANE
P35475	IDUA	0	0	0	0	0.295226	0.704774	0	0	0	0	0	LYSOSOME
P35520-2	CBSL	0	0	1	0	0	0	0	0	0	0	0	CYTOSOL
P35556	FBN2	0	0	0	0	0.509227	0	0	0	0	0	0.490773	GOLGI APPARATUS
P35579	MYH9	0	0	0.706798	0	0	0	0	0	0.293202	0	0	CYTOSOL
P35606	COPB2	0	0	0.699665	0	0	0	0	0	0.300335	0	0	CYTOSOL
P35610		0	0	0	1	0	0	0	0	0	0	0	ENDOPLASMIC RETICULUM
P35611-3	ADD1	0	0	1	0	0	0	0	0	0	0	0	CYTOSOL
P35613	BSG	0	0	0	0	0	0.280738	0	0	0	0	0.719262	PLASMA MEMBRANE
P35625	TIMP3	0	0	0	0.291244	0.252946	0.45581	0	0	0	0	0	LYSOSOME
P35637	FUS	0	0	0	0	0	0	0	0	1	0	0	NUCLEUS
P35658-5	NUP214	0.205387	0.341742	0	0	0	0	0	0	0.452871	0	0	NUCLEUS
P35659	DEK	0	0.793903	0	0	0	0	0	0	0.206097	0	0	CHROMATIN
P35813-3		0	0	1	0	0	0	0	0	0	0	0	CYTOSOL
P35914	HMGCL	0	0	0	0	0	0	1	0	0	0	0	MITOCHONDRIA
P35998	PSMC2	0	0	0.605158	0	0	0	0	0	0.394842	0	0	CYTOSOL
P36222	CHI3L1	0	0	0	0.271621	0.277454	0.450925	0	0	0	0	0	LYSOSOME
P36404	ARL2.00	0	0	0.573979	0	0	0	0	0	0.426021	0	0	CYTOSOL
P36405	ARL3.00	0	0	1	0	0	0	0	0	0	0	0	CYTOSOL
P36507	MAP2K2	0	0	1	0	0	0	0	0	0	0	0	CYTOSOL
P36542	ATP5C1	0	0	0	0	0.38568	0	0.61432	0	0	0	0	MITOCHONDRIA
P36543	ATP6V1E1	0	0	0.782018	0	0	0	0	0	0	0	0.217982	CYTOSOL
P36551	CPOX	0	0	0	0	0	0	1	0	0	0	0	MITOCHONDRIA
P36578	RPL4	1	0	0	0	0	0	0	0	0	0	0	40S/60S RIBOSOME
P36639	NUDT1	0	0	0.783242	0	0	0	0	0	0.216758	0	0	CYTOSOL
P36776	LONP1	0	0	0	0	0	0	1	0	0	0	0	MITOCHONDRIA
P36897		0	0	0	0.281803	0.304801	0.413396	0	0	0	0	0	LYSOSOME
P36955		0	0	0	0.263885	0.245222	0.397973	0	0	0	0	0.0929203	LYSOSOME
P36957	DLST	0	0	0	0	0	0	0.719598	0	0	0.280402	0	MITOCHONDRIA
P36969	GPX4	0	0	0.360904	0	0	0	0	0	0.639096	0	0	NUCLEUS
P37108	SRP14	0.17642	0	0.127983	0	0	0	0	0	0.695597	0	0	NUCLEUS
P37198	NUP62	0	0.191761	0.0901279	0	0	0	0	0	0.718112	0	0	NUCLEUS
P37235	HPCA	0	0	0.792066	0	0	0	0	0	0	0	0.207934	CYTOSOL
P37268	FDFT1	0	0	0	1	0	0	0	0	0	0	0	ENDOPLASMIC RETICULUM
P37287	PIGA	0	0	0	0.464665	0.535335	0	0	0	0	0	0	GOLGI APPARATUS
P37802	TAGLN2	0	0	1	0	0	0	0	0	0	0	0	CYTOSOL
P37837	TALDO1	0	0	1	0	0	0	0	0	0	0	0	CYTOSOL
P38117	ETFB	0	0	0	0	0	0	1	0	0	0	0	MITOCHONDRIA
P38432	COIL	0	0.34975	0	0	0	0	0	0.450519	0.19973	0	0	NUCLEOLUS
P38435	GGCX	0	0	0	0.586213	0.413787	0	0	0	0	0	0	ENDOPLASMIC RETICULUM
P38571		0	0	0	0	0	0.805636	0	0	0	0	0.194364	LYSOSOME
P38606	ATP6V1A	0	0	0.535323	0	0	0.341502	0	0	0	0	0.123175	CYTOSOL
P38646	HSPA9	0	0	0	0	0	0	1	0	0	0	0	MITOCHONDRIA
P38919	EIF4A3	0	0.14706	0	0	0	0	0	0.322856	0.530085	0	0	NUCLEUS
P39019	RPS19	1	0	0	0	0	0	0	0	0	0	0	40S/60S RIBOSOME
P39023	RPL3	1	0	0	0	0	0	0	0	0	0	0	40S/60S RIBOSOME
P39060		0	0	0	0.596591	0	0.403409	0	0	0	0	0	ENDOPLASMIC RETICULUM
P39210		0	0	0	0	0	0	1	0	0	0	0	MITOCHONDRIA
P39656	DDOST	0.198843	0	0	0.495595	0.305562	0	0	0	0	0	0	ENDOPLASMIC RETICULUM
P39687	ANP32A	0	0	1	0	0	0	0	0	0	0	0	CYTOSOL
P39748	FEN1	0	0.547815	0.0589914	0	0	0	0	0	0.393194	0	0	CHROMATIN
P39880-3		0.244538	0.755462	0	0	0	0	0	0	0	0	0	CHROMATIN
P40121	CAPG	0	0	1	0	0	0	0	0	0	0	0	CYTOSOL
P40222	TXLNA	0.156195	0.543802	0	0	0	0	0	0	0.300003	0	0	CHROMATIN
P40227	CCT6A	0	0	0.70588	0	0	0	0	0	0.29412	0	0	CYTOSOL
P40306	PSMB10	0	0	1	0	0	0	0	0	0	0	0	CYTOSOL
P40429	RPL13A	1	0	0	0	0	0	0	0	0	0	0	40S/60S RIBOSOME
P40763	STAT3	0	0	1	0	0	0	0	0	0	0	0	CYTOSOL
P40818	USP8	1	0	0	0	0	0	0	0	0	0	0	40S/60S RIBOSOME
P40855		0	0	0.78922	0	0	0	0	0	0.21078	0	0	CYTOSOL
P40925-3	MDH1	0	0	1	0	0	0	0	0	0	0	0	CYTOSOL
P40926	MDH2	0	0	0	0	0	0	0.697654	0	0	0.302346	0	MITOCHONDRIA
P40937	RFC5	0	0.245452	0.0808691	0	0	0	0	0	0.673679	0	0	NUCLEUS
P40938	RFC3	0	0.605199	0	0	0	0	0	0	0.394801	0	0	CHROMATIN
P40939	HADHA	0	0	0	0	0	0	1	0	0	0	0	MITOCHONDRIA
P41091	EIF2S3	0	0.213058	0.0660849	0	0	0	0	0	0.720858	0	0	NUCLEUS
P41214		0.239282	0.340446	0.0625788	0	0	0	0	0	0.357692	0	0	NUCLEUS
P41218	MNDA	0	1	0	0	0	0	0	0	0	0	0	CHROMATIN
P41223	BUD31	0	0	0	0	0	0	0	0.705178	0.294822	0	0	NUCLEOLUS
P41226	UBA7	0	0	1	0	0	0	0	0	0	0	0	CYTOSOL
P41227	NAA10	0	0	0.706067	0	0	0	0	0	0.293933	0	0	CYTOSOL
P41231		0	0	0	0	0	0	0	0	0	0	1	PLASMA MEMBRANE
P41240	CSK	0	0	0.512344	0	0	0	0	0	0	0	0.487656	CYTOSOL
P41250	GARS	0	0	0.607567	0	0	0	0	0	0.392433	0	0	CYTOSOL
P41252	IARS	0	0	0.660691	0	0	0	0	0	0.339309	0	0	CYTOSOL
P41440	SLC19A1	0	0	0	0	0	0	0	0	0	0	1	PLASMA MEMBRANE
P41567		0	0	0.235833	0	0	0	0	0	0.764167	0	0	NUCLEUS
P42126	ECI1	0	0	0	0	0	0	1	0	0	0	0	MITOCHONDRIA
P42166	TMPO	0	1	0	0	0	0	0	0	0	0	0	CHROMATIN
P42167	TMPO	0	1	0	0	0	0	0	0	0	0	0	CHROMATIN
P42226	STAT6	0	0	0.626982	0	0	0	0	0	0.373018	0	0	CYTOSOL
P42285	SKIV2L2	0	0	0.0859641	0	0	0	0	0	0.914036	0	0	NUCLEUS
P42331-4	ARHGAP25	0	0	0.900376	0	0	0	0	0	0	0	0.0996244	CYTOSOL
P42345	MTOR	0.789262	0	0	0	0	0	0	0	0	0	0.210738	40S/60S RIBOSOME
P42356	PI4KA	0	0	0	0	0	0	0	0	0	0	1	PLASMA MEMBRANE
P42566	EPS15	0	0	0.890566	0	0	0	0	0	0	0	0.109434	CYTOSOL
P42574	CASP3	0	0	1	0	0	0	0	0	0	0	0	CYTOSOL
P42677	RPS27	1	0	0	0	0	0	0	0	0	0	0	40S/60S RIBOSOME
P42694		0.697904	0	0	0	0	0	0	0	0.302096	0	0	40S/60S RIBOSOME
P42696	RBM34	0.270959	0	0	0	0	0	0	0.729041	0	0	0	NUCLEOLUS
P42704	LRPPRC	0	0	0	0	0	0	1	0	0	0	0	MITOCHONDRIA
P42765	ACAA2	0	0	0	0	0	0	1	0	0	0	0	MITOCHONDRIA
P42766	RPL35	1	0	0	0	0	0	0	0	0	0	0	40S/60S RIBOSOME
P42768	WAS	0.420671	0	0.110392	0	0	0	0	0	0	0	0.468937	PLASMA MEMBRANE
P42785	PRCP	0	0	0	0.337031	0	0.662969	0	0	0	0	0	LYSOSOME
P43007	SLC1A4	0	0	0	0	0	0.565661	0	0	0	0	0.434338	LYSOSOME
P43155	CRAT	0	0	0	0	0	0	1	0	0	0	0	MITOCHONDRIA
P43234		0	0	0	0	0	1	0	0	0	0	0	LYSOSOME
P43243	MATR3	0	0.228984	0	0	0	0	0	0.35293	0.418086	0	0	NUCLEUS
P43246	MSH2	0	0.455689	0.0756442	0	0	0	0	0	0.468667	0	0	NUCLEUS
P43251-2	BTD	0	0	0.207464	0	0.340748	0.451788	0	0	0	0	0	LYSOSOME
P43304	GPD2	0	0	0	0	0	0	1	0	0	0	0	MITOCHONDRIA
P43307	SSR1	0	0	0	0.716704	0	0	0.283296	0	0	0	0	ENDOPLASMIC RETICULUM
P43353	ALDH3B1	0	0	0	0	0	0	0	0	0	0	1	PLASMA MEMBRANE
P43405	SYK	0.397335	0.263168	0	0	0	0	0	0	0.339497	0	0	40S/60S RIBOSOME
P43487	RANBP1	0	0	1	0	0	0	0	0	0	0	0	CYTOSOL
P43490	NAMPT	0	0	0.614993	0	0	0	0	0	0.385007	0	0	CYTOSOL
P43686	PSMC4	0	0	0.665243	0	0	0	0	0	0.334757	0	0	CYTOSOL
P43897	TSFM	0	0	0	0	0	0	1	0	0	0	0	MITOCHONDRIA
P45877		0	0	0	0.604179	0.395821	0	0	0	0	0	0	ENDOPLASMIC RETICULUM
P45954	ACADSB	0	0	0	0	0	0	1	0	0	0	0	MITOCHONDRIA
P45973	CBX5	0	0.714394	0.0832231	0	0	0	0	0	0.202383	0	0	CHROMATIN
P45974	USP5	0	0	1	0	0	0	0	0	0	0	0	CYTOSOL
P46060	RANGAP1	0	0.324099	0.104011	0	0	0	0	0	0.57189	0	0	NUCLEUS
P46063	RECQL	0	0.683558	0	0	0	0	0	0	0.316442	0	0	CHROMATIN
P46100	ATRX	0	0.582357	0.099304	0	0	0	0	0	0.318339	0	0	CHROMATIN
P46109	CRKL	0	0	1	0	0	0	0	0	0	0	0	CYTOSOL
P46199	MTIF2	0	0	0	0	0	0	1	0	0	0	0	MITOCHONDRIA
P46379-3	BAG6	0	0	0.802353	0	0	0	0	0	0.197647	0	0	CYTOSOL
P46459	NSF	0.276161	0	0.319439	0	0.4044	0	0	0	0	0	0	GOLGI APPARATUS
P46531	NOTCH1	0	0	0	0	0.376994	0.375186	0	0	0	0	0.24782	GOLGI APPARATUS
P46734-3		0	0	0.54636	0	0	0	0	0	0.45364	0	0	CYTOSOL
P46776	RPL27A	1	0	0	0	0	0	0	0	0	0	0	40S/60S RIBOSOME
P46777	RPL5	1	0	0	0	0	0	0	0	0	0	0	40S/60S RIBOSOME
P46778	RPL21	1	0	0	0	0	0	0	0	0	0	0	40S/60S RIBOSOME
P46779	RPL28	1	0	0	0	0	0	0	0	0	0	0	40S/60S RIBOSOME
P46781	RPS9	1	0	0	0	0	0	0	0	0	0	0	40S/60S RIBOSOME
P46782	RPS5	1	0	0	0	0	0	0	0	0	0	0	40S/60S RIBOSOME
P46783	RPS10	1	0	0	0	0	0	0	0	0	0	0	40S/60S RIBOSOME
P46939	UTRN	0	0	0	0	0	0.385035	0	0	0	0	0.614965	PLASMA MEMBRANE
P46940	IQGAP1	0	0	0.776314	0	0	0	0	0	0	0	0.223685	CYTOSOL
P46977	STT3A	0	0	0	1	0	0	0	0	0	0	0	ENDOPLASMIC RETICULUM
P47755	CAPZA2	0	0	1	0	0	0	0	0	0	0	0	CYTOSOL
P47756-2	CAPZB	0	0	1	0	0	0	0	0	0	0	0	CYTOSOL
P47897	QARS	0	0	0.541861	0	0	0	0	0	0.458139	0	0	CYTOSOL
P47914	RPL29	0.893424	0	0	0	0	0	0	0	0	0	0.106576	40S/60S RIBOSOME
P47985	UQCRFS1P1	0	0	0	0	0	0	0.690706	0	0	0.309294	0	MITOCHONDRIA
P48029		0	0	0	0	0	0.688552	0	0	0	0	0.311448	LYSOSOME
P48047	ATP5O	0	0	0	0	0	0	0.723815	0	0	0.276185	0	MITOCHONDRIA
P48059-3	LIMS1	0	0	0.158307	0	0	0	0	0	0	0	0.841693	PLASMA MEMBRANE
P48147	PREP	0	0	1	0	0	0	0	0	0	0	0	CYTOSOL
P48382		0	1	0	0	0	0	0	0	0	0	0	CHROMATIN
P48426	PIP4K2A	0	0	0.150843	0	0	0	0	0	0	0	0.849158	PLASMA MEMBRANE
P48444	ARCN1	0	0	0.743755	0	0	0	0	0	0.256245	0	0	CYTOSOL
P48449	LSS	0	0	0	0.659496	0.340504	0	0	0	0	0	0	ENDOPLASMIC RETICULUM
P48507	GCLM	0	0	1	0	0	0	0	0	0	0	0	CYTOSOL
P48509	CD151	0	0	0	0	0	0	0	0	0	0	1	PLASMA MEMBRANE
P48553	TRAPPC10	0	0	0.147702	0	0	0	0	0	0	0	0.852298	PLASMA MEMBRANE
P48556	PSMD8	0	0	0.653	0	0	0	0	0	0.347	0	0	CYTOSOL
P48634	PRRC2A	1	0	0	0	0	0	0	0	0	0	0	40S/60S RIBOSOME
P48637	GSS	0	0	0.921381	0	0	0	0	0	0	0	0.0786195	CYTOSOL
P48643	CCT5	0	0	1	0	0	0	0	0	0	0	0	CYTOSOL
P48651	PTDSS1	0	0	0	1	0	0	0	0	0	0	0	ENDOPLASMIC RETICULUM
P48723	HSPA13	0.17121	0	0	0.475254	0	0.353536	0	0	0	0	0	ENDOPLASMIC RETICULUM
P48735	IDH2	0	0	0	0	0	0	1	0	0	0	0	MITOCHONDRIA
P48960	CD97	0	0	0	0	0	0.299104	0	0	0	0	0.700896	PLASMA MEMBRANE
P49023		0	0	0.381001	0	0	0	0	0	0	0	0.618999	PLASMA MEMBRANE
P49069	CAMLG	0.313931	0	0	0.37288	0.313189	0	0	0	0	0	0	ENDOPLASMIC RETICULUM
P49137	MAPKAPK2	0	0	0.86643	0	0	0	0	0	0	0	0.13357	CYTOSOL
P49189	ALDH9A1	0	0	0.366727	0	0	0	0.633273	0	0	0	0	MITOCHONDRIA
P49207	RPL34	1	0	0	0	0	0	0	0	0	0	0	40S/60S RIBOSOME
P49247	RPIA	0	0	0.656507	0	0	0	0	0	0.343493	0	0	CYTOSOL
P49257	LMAN1	0	0	0	0.622884	0	0.377116	0	0	0	0	0	ENDOPLASMIC RETICULUM
P49321-3	NASP	0	0	1	0	0	0	0	0	0	0	0	CYTOSOL
P49327	FASN	0	0	1	0	0	0	0	0	0	0	0	CYTOSOL
P49368	CCT3	0	0	0.64712	0	0	0	0	0	0.35288	0	0	CYTOSOL
P49406	MRPL19	0	0	0	0	0	0	1	0	0	0	0	MITOCHONDRIA
P49407		0	0	1	0	0	0	0	0	0	0	0	CYTOSOL
P49411	TUFM	0	0	0	0	0	0	1	0	0	0	0	MITOCHONDRIA
P49419-2		0	0	0	0	0	0	1	0	0	0	0	MITOCHONDRIA
P49448	GLUD2	0	0	0	0	0	0	1	0	0	0	0	MITOCHONDRIA
P49454		0.461901	0.538099	0	0	0	0	0	0	0	0	0	CHROMATIN
P49458	SRP9	0	0	0.282563	0	0	0	0	0	0.717437	0	0	NUCLEUS
P49585	PCYT1A	0	0	0.601542	0	0	0	0	0	0.398458	0	0	CYTOSOL
P49588	AARS	0	0	1	0	0	0	0	0	0	0	0	CYTOSOL
P49589-3		0	0	1	0	0	0	0	0	0	0	0	CYTOSOL
P49590	HARS2	0	0	0	0	0	0	1	0	0	0	0	MITOCHONDRIA
P49591	SARS	0	0	1	0	0	0	0	0	0	0	0	CYTOSOL
P49593	PPM1F	0	0	1	0	0	0	0	0	0	0	0	CYTOSOL
P49641		0	0	0	0.347386	0.311674	0	0	0	0	0.340939	0	ENDOPLASMIC RETICULUM
P49711	CTCF	0	1	0	0	0	0	0	0	0	0	0	CHROMATIN
P49715-3		0	1	0	0	0	0	0	0	0	0	0	CHROMATIN
P49736	MCM2	0	0	0.632535	0	0	0	0	0	0.367465	0	0	CYTOSOL
P49748-3	ACADVL	0	0	0	0	0	0	1	0	0	0	0	MITOCHONDRIA
P49754		0	0	0	0	0	1	0	0	0	0	0	LYSOSOME
P49755	TMED10	0	0	0	0.393907	0.300119	0.305974	0	0	0	0	0	ENDOPLASMIC RETICULUM
P49756	RBM25	0	0	0	0	0	0	0	0.337671	0.662329	0	0	NUCLEUS
P49757	NUMB	0	0	0	0	0	0.506239	0	0	0	0	0.493761	LYSOSOME
P49768	PSEN1	0	0	0	0	0	0.490398	0	0	0	0	0.509602	PLASMA MEMBRANE
P49773	HINT1	0	0	1	0	0	0	0	0	0	0	0	CYTOSOL
P49790-3	NUP153	0	0.541709	0.150794	0	0	0	0	0	0.307497	0	0	CHROMATIN
P49792	RANBP2	0.224673	0.518372	0	0	0	0	0	0	0.256955	0	0	CHROMATIN
P49795	RGS19	0	0	0.0512529	0	0	0	0	0	0	0	0.948747	PLASMA MEMBRANE
P49810	PSEN2	0	0	0	0	0	0	0	0	0	0	1	PLASMA MEMBRANE
P49815		0	0	0.121457	0	0	0	0	0.459611	0	0	0.418933	NUCLEOLUS
P49821	NDUFV1	0	0	0	0	0	0	1	0	0	0	0	MITOCHONDRIA
P49840	GSK3A	0	0	0.304612	0	0	0	0	0	0	0	0.695388	PLASMA MEMBRANE
P49841-2	GSK3B	0	0	0.085291	0	0	0	0	0	0	0	0.914709	PLASMA MEMBRANE
P49914		0	0	0.479359	0	0	0	0.520641	0	0	0	0	MITOCHONDRIA
P49915	GMPS	0	0	0.654271	0	0	0	0	0	0.345729	0	0	CYTOSOL
P49916	LIG3	0	1	0	0	0	0	0	0	0	0	0	CHROMATIN
P49959-3	MRE11A	0	0.656161	0	0	0	0	0	0	0.343839	0	0	CHROMATIN
P50135		0	0	1	0	0	0	0	0	0	0	0	CYTOSOL
P50148	GNAQ	0	0	0	0	0	0	0	0	0	0	1	PLASMA MEMBRANE
P50150		0	0	0	0	0	0	0	0	0	0	1	PLASMA MEMBRANE
P50151	GNG10	0	0	0	0	0	0	0	0	0	0	1	PLASMA MEMBRANE
P50213	IDH3A	0	0	0	0	0	0	1	0	0	0	0	MITOCHONDRIA
P50225	SULT1A1	0	0	1	0	0	0	0	0	0	0	0	CYTOSOL
P50238	CRIP1	0	0	0.353777	0	0	0	0	0	0	0	0.646223	PLASMA MEMBRANE
P50281	MMP14	0	0	0	0	0	0.36051	0	0	0	0	0.63949	PLASMA MEMBRANE
P50336	PPOX	0	0	0	0	0	0	1	0	0	0	0	MITOCHONDRIA
P50395	GDI2	0	0	1	0	0	0	0	0	0	0	0	CYTOSOL
P50416	CPT1A	0	0	0	0.521114	0	0	0.478886	0	0	0	0	ENDOPLASMIC RETICULUM
P50440-2	GATM	0	0	0	0	0	0	1	0	0	0	0	MITOCHONDRIA
P50452	SERPINB8	0	0	1	0	0	0	0	0	0	0	0	CYTOSOL
P50454	SERPINH1	0.187576	0	0	0.491499	0	0.320925	0	0	0	0	0	ENDOPLASMIC RETICULUM
P50479	PDLIM4	0	0	0.384224	0	0	0	0	0	0	0	0.615776	PLASMA MEMBRANE
P50502	ST13	0	0	1	0	0	0	0	0	0	0	0	CYTOSOL
P50552	VASP	0	0	0.0791987	0	0	0	0	0	0	0	0.920801	PLASMA MEMBRANE
P50570		0	1	0	0	0	0	0	0	0	0	0	CHROMATIN
P50591		0	0	0	0	0.801149	0	0	0	0	0	0.198851	GOLGI APPARATUS
P50895	BCAM	0	0	0	0	0	0	0	0	0	0	1	PLASMA MEMBRANE
P50897	PPT1	0	0	0	0	0.235335	0.527877	0	0	0	0	0.236788	LYSOSOME
P50914	RPL14	1	0	0	0	0	0	0	0	0	0	0	40S/60S RIBOSOME
P50990	CCT8	0	0	1	0	0	0	0	0	0	0	0	CYTOSOL
P50991	CCT4	0	0	0.81606	0	0	0	0	0	0.18394	0	0	CYTOSOL
P50995	ANXA11	0	0	0.745145	0	0	0	0	0	0	0	0.254855	CYTOSOL
P51003	PAPOLG	0	0	0.427432	0	0	0	0	0	0.572568	0	0	NUCLEUS
P51114		0.330774	0.181771	0	0	0	0	0	0.394928	0	0	0.0925267	NUCLEOLUS
P51148-2	RAB5C	0	0	0	0	0.455803	0.544197	0	0	0	0	0	LYSOSOME
P51149	RAB7A	0	0	0	0.334557	0.250565	0.414877	0	0	0	0	0	LYSOSOME
P51151	RAB9A	0	0	0.193243	0	0.277335	0.330369	0	0	0	0	0.199053	LYSOSOME
P51153	RAB13	0	0	0	0	0.265471	0	0	0	0	0	0.734529	PLASMA MEMBRANE
P51159	RAB27A	0	0	0	0.587259	0	0.412741	0	0	0	0	0	ENDOPLASMIC RETICULUM
P51397		0.731286	0	0	0	0	0	0	0	0	0	0.268714	40S/60S RIBOSOME
P51398	DAP3	0	0	0	0	0	0	1	0	0	0	0	MITOCHONDRIA
P51452	DUSP3	0	0	1	0	0	0	0	0	0	0	0	CYTOSOL
P51531-2	SMARCA2	0	1	0	0	0	0	0	0	0	0	0	CHROMATIN
P51553	IDH3G	0	0	0	0	0	0	0.708574	0	0	0.291426	0	MITOCHONDRIA
P51570-2	GALK1	0	0	1	0	0	0	0	0	0	0	0	CYTOSOL
P51571	SSR4	0.32435	0	0	0.67565	0	0	0	0	0	0	0	ENDOPLASMIC RETICULUM
P51572-2	BCAP31	0	0	0	0.644765	0	0.355235	0	0	0	0	0	ENDOPLASMIC RETICULUM
P51608-2		0.210907	0.789093	0	0	0	0	0	0	0	0	0	CHROMATIN
P51610	HCFC1	0.181543	0.499172	0	0	0	0	0	0	0.319285	0	0	CHROMATIN
P51648-2		0	0	0	1	0	0	0	0	0	0	0	ENDOPLASMIC RETICULUM
P51649-2	ALDH5A1	0	0	0	0	0	0	1	0	0	0	0	MITOCHONDRIA
P51659	HSD17B4	0.173431	0	0	0	0	0	0.260835	0	0	0.565735	0	PEROXISOME
P51665	PSMD7	0	0	0.64007	0	0	0	0	0	0.35993	0	0	CYTOSOL
P51689	ARSD	0.188396	0	0	0.518493	0.293111	0	0	0	0	0	0	ENDOPLASMIC RETICULUM
P51787	KCNQ1	0	0	0	0	0	0	0	0	0	0	1	PLASMA MEMBRANE
P51790		0	0	0	0	0	0.515347	0	0	0	0	0.484653	LYSOSOME
P51797-5	CLCN6	0	0	0	0	0	0.377111	0	0	0	0	0.622889	PLASMA MEMBRANE
P51798	CLCN7	0	0	0	0	0	0.307836	0	0	0	0	0.692164	PLASMA MEMBRANE
P51809	VAMP7	0	0	0	0	0	0.677633	0	0	0	0	0.322367	LYSOSOME
P51811		0	0	0	0	0	0	0	0	0	0	1	PLASMA MEMBRANE
P51812	RPS6KA3	0	0	0.795948	0	0	0	0	0	0.204052	0	0	CYTOSOL
P51828	ADCY7	0	0	0	0	0	0.376604	0	0	0	0	0.623396	PLASMA MEMBRANE
P51970	NDUFA8	0	0	0	0	0	0	0.682638	0	0	0.317362	0	MITOCHONDRIA
P51991	HNRNPA3	0	0.443629	0	0	0	0	0	0	0.556371	0	0	NUCLEUS
P52209	PGD	0	0	1	0	0	0	0	0	0	0	0	CYTOSOL
P52272	HNRNPM	0	0	0	0	0	0	0	0.423044	0.576956	0	0	NUCLEUS
P52292	KPNA2	0	0.241242	0.299124	0	0	0	0	0	0.459634	0	0	NUCLEUS
P52294	KPNA1	0	0	0.52039	0	0	0	0	0	0.47961	0	0	CYTOSOL
P52306-5	RAP1GDS1	0	0	1	0	0	0	0	0	0	0	0	CYTOSOL
P52429	DGKE	0	0	0	0.351581	0.3647	0.283719	0	0	0	0	0	GOLGI APPARATUS
P52565	ARHGDIA	0	0	1	0	0	0	0	0	0	0	0	CYTOSOL
P52566	ARHGDIB	0	0	1	0	0	0	0	0	0	0	0	CYTOSOL
P52594-4	AGFG1	0	0	0.0722249	0	0	0	0	0	0	0	0.927775	PLASMA MEMBRANE
P52597	HNRNPF	0	0	0.571656	0	0	0	0	0	0.428344	0	0	CYTOSOL
P52630	STAT2	0	0	0.495533	0	0	0	0	0	0	0	0.504467	PLASMA MEMBRANE
P52701	MSH6	0	0.610972	0.0573394	0	0	0	0	0	0.331688	0	0	CHROMATIN
P52732	KIF11	0	0	0.443057	0	0	0	0	0	0.556943	0	0	NUCLEUS
P52758	HRSP12	0	0	0.325261	0	0	0	0.674739	0	0	0	0	MITOCHONDRIA
P52789	HK2	0	0.216617	0.362181	0	0	0	0	0	0.421201	0	0	NUCLEUS
P52815	MRPL12	0	0	0	0	0	0	1	0	0	0	0	MITOCHONDRIA
P52849		0	0	0	0	1	0	0	0	0	0	0	GOLGI APPARATUS
P52888	THOP1	0	0	1	0	0	0	0	0	0	0	0	CYTOSOL
P52907	CAPZA1	0	0	1	0	0	0	0	0	0	0	0	CYTOSOL
P52943-2		0	0	0.101463	0	0	0	0	0	0	0	0.898537	PLASMA MEMBRANE
P52948	NUP98	0.191384	0.40745	0	0	0	0	0	0	0.401167	0	0	CHROMATIN
P53004		0	0	1	0	0	0	0	0	0	0	0	CYTOSOL
P53007	SLC25A1	0	0	0	0	0	0	1	0	0	0	0	MITOCHONDRIA
P53041	PPP5C	0	0	1	0	0	0	0	0	0	0	0	CYTOSOL
P53350	PLK1	0.418484	0.581516	0	0	0	0	0	0	0	0	0	CHROMATIN
P53384		0	0	1	0	0	0	0	0	0	0	0	CYTOSOL
P53582	METAP1	0	0.213444	0.189885	0	0	0	0	0	0.596671	0	0	NUCLEUS
P53597	SUCLG1	0	0	0	0	0	0	0.701954	0	0	0.298046	0	MITOCHONDRIA
P53602	MVD	0	0	1	0	0	0	0	0	0	0	0	CYTOSOL
P53618	COPB1	0	0	0.65593	0	0	0	0	0	0.34407	0	0	CYTOSOL
P53621	COPA	0	0	0.636944	0	0	0	0	0	0.363056	0	0	CYTOSOL
P53634	CTSC	0	0	0	0	0	1	0	0	0	0	0	LYSOSOME
P53680	AP2S1	0	0	0.127267	0	0	0.872733	0	0	0	0	0	LYSOSOME
P53701	HCCS	0	0	0	0	0	0	1	0	0	0	0	MITOCHONDRIA
P53794		0	0	0	0	0	0.493283	0	0	0	0	0.506717	PLASMA MEMBRANE
P53801	PTTG1IP	0	0	0	0	0	0.770359	0	0	0	0	0.229641	LYSOSOME
P53985		0	0	0	0	0	0.281541	0	0	0	0	0.718459	PLASMA MEMBRANE
P53990-2	IST1	0	0	0	0	0	0.85929	0	0	0	0	0.14071	LYSOSOME
P53992	SEC24C	0.554513	0	0	0	0.445487	0	0	0	0	0	0	40S/60S RIBOSOME
P53999	SUB1	0	0	0.289762	0	0	0	0	0	0.710238	0	0	NUCLEUS
P54098	POLG	0	0	0	0	0	0	1	0	0	0	0	MITOCHONDRIA
P54136	RARS	0	0	0.494783	0	0	0	0	0	0.505217	0	0	NUCLEUS
P54577	YARS	0	0	0.620272	0	0	0	0	0	0.379728	0	0	CYTOSOL
P54578		0	0	1	0	0	0	0	0	0	0	0	CYTOSOL
P54709	ATP1B3	0	0	0	0	0	0.385	0	0	0	0	0.615	PLASMA MEMBRANE
P54762	EPHB1	0	0	0.07363	0	0	0	0	0	0	0	0.92637	PLASMA MEMBRANE
P54802		0	0	0	0	0	0.805482	0	0	0	0	0.194518	LYSOSOME
P54819-2	AK2	0	0	0	0	0	0	1	0	0	0	0	MITOCHONDRIA
P54886		0	0	0	0	0	0	1	0	0	0	0	MITOCHONDRIA
P54920	NAPA	0	0	1	0	0	0	0	0	0	0	0	CYTOSOL
P55010	EIF5	0	0	1	0	0	0	0	0	0	0	0	CYTOSOL
P55011	SLC12A2	0	0	0	0	0	0.562468	0	0	0	0	0.437532	LYSOSOME
P55036	PSMD4	0	0	0.801393	0	0	0	0	0	0.198607	0	0	CYTOSOL
P55060	CSE1L	0	0	0.684028	0	0	0	0	0	0.315972	0	0	CYTOSOL
P55061-2		0	0	0	1	0	0	0	0	0	0	0	ENDOPLASMIC RETICULUM
P55072	VCP	0	0	1	0	0	0	0	0	0	0	0	CYTOSOL
P55082	MFAP3	0	0	0	0	0	0	0	0	0	0	1	PLASMA MEMBRANE
P55084	HADHB	0	0	0	0	0	0	1	0	0	0	0	MITOCHONDRIA
P55145	MANF	0	0	0	0.638529	0	0.361471	0	0	0	0	0	ENDOPLASMIC RETICULUM
P55160	NCKAP1L	0	0	0	0	0.35218	0	0	0	0	0	0.64782	PLASMA MEMBRANE
P55196-5	AFDN	0	0	0.0491485	0	0	0	0	0	0	0	0.950851	PLASMA MEMBRANE
P55209	NAP1L1	0	0	1	0	0	0	0	0	0	0	0	CYTOSOL
P55265-4		0.167306	0	0	0	0	0	0	0.507485	0.325209	0	0	NUCLEOLUS
P55735	SEC13	0	0	0.192251	0	0	0	0	0	0.807749	0	0	NUCLEUS
P55769	SNU13	0	0	0	0	0	0	0	0.724081	0.275919	0	0	NUCLEOLUS
P55786	NPEPPS	0	0	1	0	0	0	0	0	0	0	0	CYTOSOL
P55789	GFER	0	0	0	0	0	0	1	0	0	0	0	MITOCHONDRIA
P55809	OXCT1	0	0	0	0	0	0	1	0	0	0	0	MITOCHONDRIA
P55884-2	EIF3B	0	0	0.423545	0	0	0	0	0	0.576455	0	0	NUCLEUS
P55899	FCGRT	0	0	0	0	0	0.721077	0	0	0	0	0.278923	LYSOSOME
P55957-2	BID	0	0	1	0	0	0	0	0	0	0	0	CYTOSOL
P56134		0	0	0	0	0	0	0.557254	0	0	0.442746	0	MITOCHONDRIA
P56181-2	NDUFV3	0	0	0	0	0	0	1	0	0	0	0	MITOCHONDRIA
P56182	RRP1	0	0	0	0	0	0	0	0.801389	0.198611	0	0	NUCLEOLUS
P56192	MARS	0	0	0.609848	0	0	0	0	0	0.390151	0	0	CYTOSOL
P56277		0	0	0	0	0	0	1	0	0	0	0	MITOCHONDRIA
P56377	AP1S2	0.20558	0	0.196318	0	0	0.404976	0	0	0	0	0.193127	LYSOSOME
P56378	MP68	0	0	0	0	0	0	1	0	0	0	0	MITOCHONDRIA
P56381	ATP5E	0	0.514	0	0	0.486	0	0	0	0	0	0	CHROMATIN
P56385	ATP5I	0	0	0	0	0	0	0.643853	0	0	0.356147	0	MITOCHONDRIA
P56537	EIF6	0.168345	0	0.162613	0	0	0	0	0	0.669042	0	0	NUCLEUS
P56556		0	0	0	0	0	0	1	0	0	0	0	MITOCHONDRIA
P56589	PEX3	0	0	0	0	0	0	0.497567	0	0	0.502433	0	PEROXISOME
P56730	PRSS12	0	0	0	0	0.460677	0.443439	0	0	0	0	0.0958843	GOLGI APPARATUS
P56937		0	0	0	0.648007	0.351993	0	0	0	0	0	0	ENDOPLASMIC RETICULUM
P56962	STX17	0	0	0	0.554641	0.445359	0	0	0	0	0	0	ENDOPLASMIC RETICULUM
P57088	TMEM33	0	0	0	1	0	0	0	0	0	0	0	ENDOPLASMIC RETICULUM
P57105	SYNJ2BP	0	0	0	0	0	0	1	0	0	0	0	MITOCHONDRIA
P57740	NUP107	0	0.357913	0.233517	0	0	0	0	0	0.40857	0	0	NUCLEUS
P57764		0	0	1	0	0	0	0	0	0	0	0	CYTOSOL
P57772	EEFSEC	0.275686	0.257811	0	0	0	0	0	0	0.466503	0	0	NUCLEUS
P58335-4		0	0	0	0	0	0.626699	0	0	0	0	0.373301	LYSOSOME
P58557		0	0	0	0	0	0	0.666744	0	0	0.333256	0	MITOCHONDRIA
P59998-3	ARPC4	0.265	0	0.350335	0	0	0	0	0	0.287012	0	0.0976524	CYTOSOL
P60033	CD81	0	0	0	0	0	0.415294	0	0	0	0	0.584706	PLASMA MEMBRANE
P60174	TPI1	0	0	1	0	0	0	0	0	0	0	0	CYTOSOL
P60228	EIF3E	0	0	0.265859	0	0	0	0	0	0.734141	0	0	NUCLEUS
P60468	SEC61B	0.279421	0	0	0	0.59034	0	0	0	0	0	0.130238	GOLGI APPARATUS
P60602		0	0	0	0	0	0	1	0	0	0	0	MITOCHONDRIA
P60604	UBE2G2	0	0	0	1	0	0	0	0	0	0	0	ENDOPLASMIC RETICULUM
P60660-2		0	0	1	0	0	0	0	0	0	0	0	CYTOSOL
P60842	EIF4A1	0	0	0.406052	0	0	0	0	0	0.593948	0	0	NUCLEUS
P60866-2	RPS20	1	0	0	0	0	0	0	0	0	0	0	40S/60S RIBOSOME
P60891	PRPS1	0	0	0.699589	0	0	0	0	0	0.300411	0	0	CYTOSOL
P60900		0	0	1	0	0	0	0	0	0	0	0	CYTOSOL
P60903		0	0	0	0	0	0.666049	0	0	0	0	0.333951	LYSOSOME
P60953	CDC42	0	0	0.13323	0	0	0	0	0	0	0	0.86677	PLASMA MEMBRANE
P60981	DSTN	0	0	1	0	0	0	0	0	0	0	0	CYTOSOL
P60983		0	0	1	0	0	0	0	0	0	0	0	CYTOSOL
P61006	RAB8A	0	0	0	0	0.553182	0.446818	0	0	0	0	0	GOLGI APPARATUS
P61009	SPCS3	0	0	0	1	0	0	0	0	0	0	0	ENDOPLASMIC RETICULUM
P61011	SRP54	0.374406	0	0.182187	0	0	0	0	0	0.443407	0	0	NUCLEUS
P61018-2	RAB4B	0	0	0	0.299752	0.256422	0.443827	0	0	0	0	0	LYSOSOME
P61019	RAB2A	0	0	0	0.540053	0	0.459947	0	0	0	0	0	ENDOPLASMIC RETICULUM
P61020	RAB5B	0	0	0	0	0.40957	0.506508	0	0	0	0	0.0839217	LYSOSOME
P61026	RAB10	0	0	0	0.491433	0	0.508567	0	0	0	0	0	LYSOSOME
P61081	UBE2M	0	0	1	0	0	0	0	0	0	0	0	CYTOSOL
P61088	UBE2N	0	0	1	0	0	0	0	0	0	0	0	CYTOSOL
P61106	RAB14	0	0	0	0.375322	0	0.624678	0	0	0	0	0	LYSOSOME
P61158	ACTR3	0.285662	0	0.213615	0	0	0	0	0	0.365423	0	0.1353	NUCLEUS
P61160	ACTR2	0.316589	0	0.278103	0	0	0	0	0	0.405309	0	0	NUCLEUS
P61163	ACTR1A	0	0	0.802297	0	0	0	0	0	0.197703	0	0	CYTOSOL
P61221	ABCE1	0.52227	0	0.067793	0	0	0	0	0	0.409937	0	0	40S/60S RIBOSOME
P61224	RAP1B	0	0	0	0	0	0	0	0	0	0	1	PLASMA MEMBRANE
P61225		0	0	0	0	0	0.304967	0	0	0	0	0.695033	PLASMA MEMBRANE
P61247	RPS3A	1	0	0	0	0	0	0	0	0	0	0	40S/60S RIBOSOME
P61313	RPL15	1	0	0	0	0	0	0	0	0	0	0	40S/60S RIBOSOME
P61353	RPL27	1	0	0	0	0	0	0	0	0	0	0	40S/60S RIBOSOME
P61421	ATP6V0D1	0	0	0	0	0	0.761883	0	0	0	0	0.238117	LYSOSOME
P61513	RPL37A	1	0	0	0	0	0	0	0	0	0	0	40S/60S RIBOSOME
P61586	RHOA	0	0	0.0947228	0	0	0	0	0	0	0	0.905277	PLASMA MEMBRANE
P61604	HSPE1	0	0	0	0	0	0	0.730967	0	0	0.269033	0	MITOCHONDRIA
P61619	SEC61A1	0	0	0	0.684379	0	0	0.315621	0	0	0	0	ENDOPLASMIC RETICULUM
P61626	LYZ	0	0	0	0	0.281076	0.585791	0	0	0	0	0.133132	LYSOSOME
P61758	VBP1	0	0	1	0	0	0	0	0	0	0	0	CYTOSOL
P61769	B2M	0	0	0	0	0	0	0	0	0	0	1	PLASMA MEMBRANE
P61803	DAD1	0	0	0	1	0	0	0	0	0	0	0	ENDOPLASMIC RETICULUM
P61916	NPC2	0	0	0	0.285145	0	0.714855	0	0	0	0	0	LYSOSOME
P61923-4	COPZ1	0	0	0.545258	0	0	0	0	0	0.454742	0	0	CYTOSOL
P61927	RPL37	0.761031	0	0	0	0	0	0	0	0	0	0.238969	40S/60S RIBOSOME
P61962		0	0	0.319445	0	0	0	0	0	0.680555	0	0	NUCLEUS
P61964	WDR5	0	0.542943	0	0	0	0	0	0	0.457057	0	0	CHROMATIN
P61978-2		0	0	0.177834	0	0	0	0	0	0.822166	0	0	NUCLEUS
P61981	YWHAG	0	0	1	0	0	0	0	0	0	0	0	CYTOSOL
P62070-4	RRAS2	0	0	0	0	0	0	0	0	0	0	1	PLASMA MEMBRANE
P62072	TIMM10	0	0	0	0	0	0	0.711894	0	0	0.288106	0	MITOCHONDRIA
P62081	RPS7	1	0	0	0	0	0	0	0	0	0	0	40S/60S RIBOSOME
P62136	PPP1CA	0	0	0.499061	0	0	0	0	0	0	0	0.500939	PLASMA MEMBRANE
P62140		0	0	0.432077	0	0	0	0	0	0	0	0.567923	PLASMA MEMBRANE
P62158	CALM1	0	0	1	0	0	0	0	0	0	0	0	CYTOSOL
P62191	PSMC1	0	0	1	0	0	0	0	0	0	0	0	CYTOSOL
P62195	PSMC5	0	0	0.663604	0	0	0	0	0	0.336396	0	0	CYTOSOL
P62241	RPS8	1	0	0	0	0	0	0	0	0	0	0	40S/60S RIBOSOME
P62244	RPS15A	1	0	0	0	0	0	0	0	0	0	0	40S/60S RIBOSOME
P62249	RPS16	1	0	0	0	0	0	0	0	0	0	0	40S/60S RIBOSOME
P62258	YWHAE	0	0	1	0	0	0	0	0	0	0	0	CYTOSOL
P62263	RPS14	1	0	0	0	0	0	0	0	0	0	0	40S/60S RIBOSOME
P62266	RPS23	1	0	0	0	0	0	0	0	0	0	0	40S/60S RIBOSOME
P62269	RPS18	1	0	0	0	0	0	0	0	0	0	0	40S/60S RIBOSOME
P62273	RPS29	0.750726	0	0	0	0	0	0	0	0	0	0.249274	40S/60S RIBOSOME
P62277	RPS13	1	0	0	0	0	0	0	0	0	0	0	40S/60S RIBOSOME
P62280	RPS11	1	0	0	0	0	0	0	0	0	0	0	40S/60S RIBOSOME
P62306		0	0	0	0	0	0	0	0.267385	0.732615	0	0	NUCLEUS
P62316	SNRPD2	0	0	0.0569866	0	0	0	0	0	0.943013	0	0	NUCLEUS
P62318	SNRPD3	0	0	0.048853	0	0	0	0	0.256248	0.694899	0	0	NUCLEUS
P62328		0	0	1	0	0	0	0	0	0	0	0	CYTOSOL
P62330	ARF6	0	0	0.190144	0	0	0.338396	0	0	0	0	0.47146	PLASMA MEMBRANE
P62333	PSMC6	0	0	0.695986	0	0	0	0	0	0.304014	0	0	CYTOSOL
P62424	RPL7A	1	0	0	0	0	0	0	0	0	0	0	40S/60S RIBOSOME
P62495	ETF1	0.376432	0	0.15912	0	0	0	0	0	0.464448	0	0	NUCLEUS
P62701	RPS4X	1	0	0	0	0	0	0	0	0	0	0	40S/60S RIBOSOME
P62750	RPL23A	1	0	0	0	0	0	0	0	0	0	0	40S/60S RIBOSOME
P62753	RPS6	1	0	0	0	0	0	0	0	0	0	0	40S/60S RIBOSOME
P62805	HIST1H4A	0	1	0	0	0	0	0	0	0	0	0	CHROMATIN
P62820	RAB1A	0	0	0	0	0.685203	0	0	0	0	0	0.314797	GOLGI APPARATUS
P62826	RAN	0	0	0.71912	0	0	0	0	0	0.28088	0	0	CYTOSOL
P62829	RPL23	1	0	0	0	0	0	0	0	0	0	0	40S/60S RIBOSOME
P62834	RAP1A	0	0	0	0	0	0	0	0	0	0	1	PLASMA MEMBRANE
P62841	RPS15	1	0	0	0	0	0	0	0	0	0	0	40S/60S RIBOSOME
P62851	RPS25	1	0	0	0	0	0	0	0	0	0	0	40S/60S RIBOSOME
P62854	RPS26	1	0	0	0	0	0	0	0	0	0	0	40S/60S RIBOSOME
P62857	RPS28	0.611551	0	0	0	0	0	0	0.388449	0	0	0	40S/60S RIBOSOME
P62861	FAU	1	0	0	0	0	0	0	0	0	0	0	40S/60S RIBOSOME
P62873	GNB1	0	0	0	0	0	0	0	0	0	0	1	PLASMA MEMBRANE
P62879	GNB2	0	0	0	0	0	0	0	0	0	0	1	PLASMA MEMBRANE
P62888	RPL30	1	0	0	0	0	0	0	0	0	0	0	40S/60S RIBOSOME
P62891		1	0	0	0	0	0	0	0	0	0	0	40S/60S RIBOSOME
P62899	RPL31	1	0	0	0	0	0	0	0	0	0	0	40S/60S RIBOSOME
P62906	RPL10A	1	0	0	0	0	0	0	0	0	0	0	40S/60S RIBOSOME
P62910	RPL32	1	0	0	0	0	0	0	0	0	0	0	40S/60S RIBOSOME
P62913	RPL11	1	0	0	0	0	0	0	0	0	0	0	40S/60S RIBOSOME
P62917	RPL8	1	0	0	0	0	0	0	0	0	0	0	40S/60S RIBOSOME
P62937	PPIA	0	0	1	0	0	0	0	0	0	0	0	CYTOSOL
P62942		0	0	0.907421	0	0	0	0	0	0	0	0.0925787	CYTOSOL
P62979	RPS27A	1	0	0	0	0	0	0	0	0	0	0	40S/60S RIBOSOME
P62993	GRB2	0	0	0.916096	0	0	0	0	0	0	0	0.0839037	CYTOSOL
P62995		0	0	0.0625642	0	0	0	0	0	0.937436	0	0	NUCLEUS
P63000-2	RAC1	0	0	0.110525	0	0	0	0	0	0	0	0.889475	PLASMA MEMBRANE
P63010-2	AP2B1	0	0	0	0	0	0.843424	0	0	0	0	0.156576	LYSOSOME
P63092-2		0	0	0.364024	0	0	0	0	0	0	0	0.635976	PLASMA MEMBRANE
P63104	YWHAZ	0	0	1	0	0	0	0	0	0	0	0	CYTOSOL
P63151-2	PPP2R2A	0	0	1	0	0	0	0	0	0	0	0	CYTOSOL
P63165	SUMO1	0	0.362286	0.0973622	0	0	0	0	0	0.540352	0	0	NUCLEUS
P63167	DYNLL1	0	0	0.611973	0	0	0	0	0	0.388027	0	0	CYTOSOL
P63173	RPL38	1	0	0	0	0	0	0	0	0	0	0	40S/60S RIBOSOME
P63208	SKP1	0	0	0.617554	0	0	0	0	0	0.382446	0	0	CYTOSOL
P63218	GNG5	0	0	0	0	0	0.379169	0	0	0	0	0.620831	PLASMA MEMBRANE
P63220	RPS21	1	0	0	0	0	0	0	0	0	0	0	40S/60S RIBOSOME
P63241		0.262331	0	0.0928454	0	0	0	0	0	0.644823	0	0	NUCLEUS
P63244	RACK1	0.685721	0	0	0	0	0	0	0	0.314279	0	0	40S/60S RIBOSOME
P63279	UBE2I	0	0	0.348185	0	0	0	0	0	0.651815	0	0	NUCLEUS
P67809	YBX1	0.316304	0.192463	0	0	0	0	0	0	0.491234	0	0	NUCLEUS
P67812-3	SEC11B	1	0	0	0	0	0	0	0	0	0	0	40S/60S RIBOSOME
P67870	CSNK2B	0	0	0.728854	0	0	0	0	0	0.271146	0	0	CYTOSOL
P67936	TPM4	0	0	1	0	0	0	0	0	0	0	0	CYTOSOL
P68032	ACTG2	0	0	0.784219	0	0	0	0	0	0.215781	0	0	CYTOSOL
P68036-3	UBE2L3	0	0	1	0	0	0	0	0	0	0	0	CYTOSOL
P68104	EEF1A1	0.21244	0.364777	0.0825953	0	0	0	0	0	0.340188	0	0	CHROMATIN
P68371	TUBB4B	0	0	0.834694	0	0	0	0	0	0	0	0.165306	CYTOSOL
P68400	CSNK2A1	0	0	0.808036	0	0	0	0	0	0.191964	0	0	CYTOSOL
P69905	HBA1	0.199594	0.800406	0	0	0	0	0	0	0	0	0	CHROMATIN
P78316	NOP14	0	0	0	0	0	0	0	1	0	0	0	NUCLEOLUS
P78324	SIRPB1	0	0	0	0	0	0	0	0	0	0	1	PLASMA MEMBRANE
P78344		0.399967	0	0	0	0	0	0	0	0.600033	0	0	NUCLEUS
P78347	GTF2I	0	1	0	0	0	0	0	0	0	0	0	CHROMATIN
P78356	PIP4K2B	0	0	0.139236	0	0	0	0	0	0	0	0.860764	PLASMA MEMBRANE
P78368	CSNK1G2	0	0	0	0	0	0	0	0	0	0	1	PLASMA MEMBRANE
P78371	CCT2	0	0	1	0	0	0	0	0	0	0	0	CYTOSOL
P78382		0	0	0	0.514875	0	0.485125	0	0	0	0	0	ENDOPLASMIC RETICULUM
P78406	RAE1	0.207562	0.377093	0	0	0	0	0	0	0.415345	0	0	NUCLEUS
P78417	GSTO1	0	0	1	0	0	0	0	0	0	0	0	CYTOSOL
P78527	PRKDC	0	0.701425	0	0	0	0	0	0	0.298575	0	0	CHROMATIN
P78536	ADAM17	0	0	0	0	0	0	0	0	0	0	1	PLASMA MEMBRANE
P78537		0	0	0.259891	0	0	0.417881	0	0	0	0	0.322228	LYSOSOME
P80217-2	IFI35	0.299006	0.209268	0.0833138	0	0	0	0	0	0.408412	0	0	NUCLEUS
P80303	NUCB2	0	0	0	0.50763	0	0.49237	0	0	0	0	0	ENDOPLASMIC RETICULUM
P80723	BASP1	0	0	0.281392	0	0	0.342172	0	0	0	0	0.376435	PLASMA MEMBRANE
P82094-2	TMF1	0	0	0.441066	0	0.558934	0	0	0	0	0	0	GOLGI APPARATUS
P82650	MRPS22	0	0	0	0	0	0	1	0	0	0	0	MITOCHONDRIA
P82663	MRPS25	0	0	0	0	0	0	1	0	0	0	0	MITOCHONDRIA
P82664		0	0	0	0	0	0	1	0	0	0	0	MITOCHONDRIA
P82673	MRPS35	0	0	0	0	0	0	1	0	0	0	0	MITOCHONDRIA
P82675	MRPS5	0	0	0	0	0	0	1	0	0	0	0	MITOCHONDRIA
P82909	MRPS36	0	0	0	0	0	0	0.598036	0	0	0.401964	0	MITOCHONDRIA
P82912	MRPS11	0	0	0	0	0	0	0.720959	0	0	0.279041	0	MITOCHONDRIA
P82914		0	0	0	0	0	0	0.740854	0	0	0.259146	0	MITOCHONDRIA
P82921	MRPS21	0	0.229612	0	0	0	0	0.429313	0	0	0.341075	0	MITOCHONDRIA
P82930	MRPS34	0	0	0	0	0	0	0.599879	0	0	0.400121	0	MITOCHONDRIA
P82932		0	0	0	0	0	0	1	0	0	0	0	MITOCHONDRIA
P82933	MRPS9	0	0	0	0	0	0	0.729242	0	0	0.270758	0	MITOCHONDRIA
P82979	SARNP	0	0.303575	0	0	0	0	0	0.374667	0.321758	0	0	NUCLEOLUS
P83111	LACTB	0	0	0	0	0	0	1	0	0	0	0	MITOCHONDRIA
P83731	RPL24	1	0	0	0	0	0	0	0	0	0	0	40S/60S RIBOSOME
P83881	RPL36A	1	0	0	0	0	0	0	0	0	0	0	40S/60S RIBOSOME
P84077	ARF3	0	0	1	0	0	0	0	0	0	0	0	CYTOSOL
P84090	ERH	0	0	0	0	0	0	0	0	1	0	0	NUCLEUS
P84095	RHOG	0	0	0	0	0	0	0	0	0	0	1	PLASMA MEMBRANE
P84098	RPL19	1	0	0	0	0	0	0	0	0	0	0	40S/60S RIBOSOME
P84101	SERF2	0.353961	0.307999	0.0961256	0	0	0	0	0	0.241914	0	0	40S/60S RIBOSOME
P84103	SRSF3	0	0.183525	0.0518888	0	0	0	0	0	0.764587	0	0	NUCLEUS
P84243		0	0.432841	0.10113	0	0	0	0	0	0.466029	0	0	NUCLEUS
P85037	FOXK1	0	0.577715	0.053653	0	0	0	0	0	0.368632	0	0	CHROMATIN
P86790	CCZ1B	0	0	0	0	0	0.67271	0	0	0	0	0.32729	LYSOSOME
P98082	DAB2	0	0	0.133783	0	0	0.440406	0	0	0	0	0.425811	LYSOSOME
P98155-2	VLDLR	0	0	0	0	0.224184	0.508855	0	0	0	0	0.266961	LYSOSOME
P98160	HSPG2	0.244837	0	0	0.342138	0.413025	0	0	0	0	0	0	GOLGI APPARATUS
P98171-2	ARHGAP4	0	0.318449	0.0800628	0	0.308926	0	0	0	0	0	0.292562	CHROMATIN
P98175-3	RBM10	0	0	0.141858	0	0	0	0	0	0.858142	0	0	NUCLEUS
P98179	RBM3	0	0.17636	0.0731408	0	0	0	0	0	0.750499	0	0	NUCLEUS
P98194-7	ATP2C1	0	0	0	0.27451	0.455661	0.269828	0	0	0	0	0	GOLGI APPARATUS
P98196	ATP11A	0	0	0	0	0	0	0	0	0	0	1	PLASMA MEMBRANE
P99999	CYCS	0	0	0	0	0	0	1	0	0	0	0	MITOCHONDRIA
Q00013	MPP1	0	0	0	0	0	0	0	0	0	0	1	PLASMA MEMBRANE
Q00059	TFAM	0	0	0	0	0	0	1	0	0	0	0	MITOCHONDRIA
Q00325-2	SLC25A3	0	0	0	0	0	0	1	0	0	0	0	MITOCHONDRIA
Q00341	HDLBP	1	0	0	0	0	0	0	0	0	0	0	40S/60S RIBOSOME
Q00534	CDK6	0	0	1	0	0	0	0	0	0	0	0	CYTOSOL
Q00535	CDK5	0	0	0.896822	0	0	0	0	0	0	0	0.103178	CYTOSOL
Q00577	PURA	0	0	0.354451	0	0	0	0	0	0.645549	0	0	NUCLEUS
Q00610	CLTC	0	0	0.365292	0	0	0.49168	0	0	0	0	0.143027	LYSOSOME
Q00653-4		0	0.22671	0.77329	0	0	0	0	0	0	0	0	CYTOSOL
Q00688	FKBP3	1	0	0	0	0	0	0	0	0	0	0	40S/60S RIBOSOME
Q00765	REEP5	0	0	0	0.349482	0.254908	0.395611	0	0	0	0	0	LYSOSOME
Q00796	SORD	0.398936	0	0.20028	0	0	0	0	0	0.400784	0	0	NUCLEUS
Q00839	HNRNPU	0	0	0	0	0	0	0	0.403777	0.596223	0	0	NUCLEUS
Q00839-2	HNRNPU	0	0	0	0	0	0	0	0	1	0	0	NUCLEUS
Q01081	U2AF1L4	0	0	0	0	0	0	0	0	1	0	0	NUCLEUS
Q01082	SPTBN1	0	0	0	0	0	0	0	0	0	0	1	PLASMA MEMBRANE
Q01082-3	SPTBN1	0	0	0	0	0	0	0	0	0	0	1	PLASMA MEMBRANE
Q01085-2		0	0	1	0	0	0	0	0	0	0	0	CYTOSOL
Q01151		0	0	0	0	0	0.518027	0	0	0	0	0.481973	LYSOSOME
Q01196-8	RUNX1	0	1	0	0	0	0	0	0	0	0	0	CHROMATIN
Q01433	AMPD2	0	0	0.85127	0	0	0	0	0	0	0	0.14873	CYTOSOL
Q01459	CTBS	0	0	0	0	0	1	0	0	0	0	0	LYSOSOME
Q01469	FABP5	0	0	1	0	0	0	0	0	0	0	0	CYTOSOL
Q01518	CAP1	0	0	0.493263	0	0	0	0	0.278818	0.227919	0	0	CYTOSOL
Q01581	HMGCS1	0	0	1	0	0	0	0	0	0	0	0	CYTOSOL
Q01628		0	0	0	0.523895	0	0.476105	0	0	0	0	0	ENDOPLASMIC RETICULUM
Q01650	SLC7A5	0	0	0	0	0	0	0	0	0	0	1	PLASMA MEMBRANE
Q01780	EXOSC10	0	0	0	0	0	0	0	0.540753	0.459247	0	0	NUCLEOLUS
Q01813	PFKP	0	0	0.429969	0	0	0	0	0	0.570031	0	0	NUCLEUS
Q01826-2	SATB1	0	1	0	0	0	0	0	0	0	0	0	CHROMATIN
Q01844-5	EWSR1	0.166641	0.179899	0	0	0	0	0	0.277364	0.376096	0	0	NUCLEUS
Q01968	OCRL	0.226183	0	0	0	0.471933	0	0	0	0	0	0.301883	GOLGI APPARATUS
Q01970	PLCB3	0	0	0	0	0	0	0	0	0	0	1	PLASMA MEMBRANE
Q02040	AKAP17A	0.250674	0	0	0	0	0	0	0.434512	0.314815	0	0	NUCLEOLUS
Q02083		0	0	0	0.333671	0	0.666329	0	0	0	0	0	LYSOSOME
Q02127	DHODH	0	0	0	0	0	0	0.708395	0	0	0.291605	0	MITOCHONDRIA
Q02218	OGDH	0	0	0	0	0	0	1	0	0	0	0	MITOCHONDRIA
Q02241	KIF23	0	1	0	0	0	0	0	0	0	0	0	CHROMATIN
Q02252	ALDH6A1	0	0	0	0	0	0	1	0	0	0	0	MITOCHONDRIA
Q02338	BDH1	0	0	0	0	0	0	1	0	0	0	0	MITOCHONDRIA
Q02543	RPL18A	1	0	0	0	0	0	0	0	0	0	0	40S/60S RIBOSOME
Q02556	IRF8	0	0.398969	0.146681	0	0	0	0	0	0.454351	0	0	NUCLEUS
Q02790	FKBP4	0	0	1	0	0	0	0	0	0	0	0	CYTOSOL
Q02809-2	PLOD1	0	0	0	0.54821	0	0.45179	0	0	0	0	0	ENDOPLASMIC RETICULUM
Q02818	NUCB1	0	0	0	1	0	0	0	0	0	0	0	ENDOPLASMIC RETICULUM
Q02878	RPL6	1	0	0	0	0	0	0	0	0	0	0	40S/60S RIBOSOME
Q02880-2	TOP2B	0	1	0	0	0	0	0	0	0	0	0	CHROMATIN
Q02978	SLC25A11	0	0	0	0	0	0	1	0	0	0	0	MITOCHONDRIA
Q03169	TNFAIP2	0.301765	0.303817	0.10543	0	0	0	0	0	0	0	0.288988	CHROMATIN
Q03188	CENPC	0	1	0	0	0	0	0	0	0	0	0	CHROMATIN
Q03252	LMNB2	0	0.653517	0	0	0	0	0.346483	0	0	0	0	CHROMATIN
Q03405	PLAUR	0	0	0	0	0	0	0	0	0	0	1	PLASMA MEMBRANE
Q03426	MVK	0	0	1	0	0	0	0	0	0	0	0	CYTOSOL
Q03518	TAP1	0	0	0	0.367545	0.314839	0.317616	0	0	0	0	0	ENDOPLASMIC RETICULUM
Q03519	TAP2	0	0	0	0.632285	0	0.367715	0	0	0	0	0	ENDOPLASMIC RETICULUM
Q03701	CEBPZ	0	0	0	0	0	0	0	0.803265	0.196735	0	0	NUCLEOLUS
Q04206	RELA	0	0	1	0	0	0	0	0	0	0	0	CYTOSOL
Q04323-2	UBXN1	0	0	1	0	0	0	0	0	0	0	0	CYTOSOL
Q04446	GBE1	0	0	1	0	0	0	0	0	0	0	0	CYTOSOL
Q04656-3		0	0	0	0	0	0.333138	0	0	0	0	0.666862	PLASMA MEMBRANE
Q04721	NOTCH2	0	0	0	0.255689	0.301506	0.374011	0	0	0	0	0.0687939	LYSOSOME
Q04759	PRKCQ	0	0	0	0	0	0	0	0	0	0	1	PLASMA MEMBRANE
Q04760	GLO1	0	0	1	0	0	0	0	0	0	0	0	CYTOSOL
Q04837	SSBP1	0	0	0	0	0	0	0.661968	0	0	0.338032	0	MITOCHONDRIA
Q04917	YWHAH	0	0	1	0	0	0	0	0	0	0	0	CYTOSOL
Q04941	PLP2	0	0	0	0	0	0	0	0	0	0	1	PLASMA MEMBRANE
Q05193	DNM1	0.30091	0	0.52041	0	0	0	0	0	0	0	0.17868	CYTOSOL
Q05209	PTPN12	0	0	0.735932	0	0	0	0	0	0	0	0.264068	CYTOSOL
Q05639	EEF1A2	0.400792	0.177039	0.0561267	0	0	0	0	0	0.366043	0	0	40S/60S RIBOSOME
Q05655	PRKCD	0	0	0.6921	0	0	0	0	0	0	0	0.3079	CYTOSOL
Q05932		0	0.194302	0	0	0	0	0.445041	0	0	0.360658	0	MITOCHONDRIA
Q05D32	CTDSPL2	0	0.760289	0	0	0	0	0	0	0.239711	0	0	CHROMATIN
Q06055-2	ATP5G1	0	0.194222	0	0	0.30727	0	0.194291	0	0	0.304216	0	GOLGI APPARATUS
Q06124-2	PTPN11	0	0	0.725003	0	0	0	0	0	0.274997	0	0	CYTOSOL
Q06136	KDSR	0	0	0	0.437197	0.267976	0.294827	0	0	0	0	0	ENDOPLASMIC RETICULUM
Q06187-2	BTK	0	0	1	0	0	0	0	0	0	0	0	CYTOSOL
Q06210	GFPT1	0	0	0.459912	0	0	0	0	0	0.540088	0	0	NUCLEUS
Q06265-2		0	0	0.0624678	0	0	0	0	0	0.937532	0	0	NUCLEUS
Q06323	PSME1	0	0	1	0	0	0	0	0	0	0	0	CYTOSOL
Q06330		0	1	0	0	0	0	0	0	0	0	0	CHROMATIN
Q06413-5		0	1	0	0	0	0	0	0	0	0	0	CHROMATIN
Q06481	APLP2	0	0	0	0	0	0	0	0	0	0	1	PLASMA MEMBRANE
Q06830	PRDX1	0	0	0.841655	0	0	0	0	0	0	0	0.158345	CYTOSOL
Q07020	RPL18	1	0	0	0	0	0	0	0	0	0	0	40S/60S RIBOSOME
Q07021	C1QBP	0	0	0	0	0	0	1	0	0	0	0	MITOCHONDRIA
Q07065	CKAP4	0.315473	0	0	0.684527	0	0	0	0	0	0	0	ENDOPLASMIC RETICULUM
Q07666	KHDRBS1	0	0.338519	0	0	0	0	0	0.405145	0.256335	0	0	NUCLEOLUS
Q07812-2	BAX	0	0.332463	0.140618	0	0	0	0.526919	0	0	0	0	MITOCHONDRIA
Q07820	MCL1	0.230938	0.17646	0.0562592	0	0.343177	0	0	0	0	0	0.193165	GOLGI APPARATUS
Q07954	LRP1	0	0	0	0	0	0.469671	0	0	0	0	0.530329	PLASMA MEMBRANE
Q07955	SRSF1	0	0	0.3765	0	0	0	0	0	0.6235	0	0	NUCLEUS
Q07960	ARHGAP1	0	0	1	0	0	0	0	0	0	0	0	CYTOSOL
Q08170		0	0	0.452326	0	0	0	0	0	0.547674	0	0	NUCLEUS
Q08209-2	PPP3CA	0	0	0.672102	0	0	0	0	0	0	0	0.327898	CYTOSOL
Q08211	DHX9	0.290379	0	0.0649625	0	0	0	0	0	0.644659	0	0	NUCLEUS
Q08334	IL10RB	0	0	0	0	0	0	0	0	0	0	1	PLASMA MEMBRANE
Q08357	SLC20A2	0	0	0	0	0	0.295594	0	0	0	0	0.704406	PLASMA MEMBRANE
Q08378	GOLGA3	0	0	1	0	0	0	0	0	0	0	0	CYTOSOL
Q08379	GOLGA2	0.225323	0.322465	0	0	0	0	0	0	0.452212	0	0	NUCLEUS
Q08380	LGALS3BP	0	0	0	0	0.262323	0.737677	0	0	0	0	0	LYSOSOME
Q08426	EHHADH	0.269215	0	0	0	0	0	0	0	0	0.730785	0	PEROXISOME
Q08722	CD47	0	0	0	0	0	0.502004	0	0	0	0	0.497996	LYSOSOME
Q08752	PPID	0	0	0.77233	0	0	0	0	0	0.22767	0	0	CYTOSOL
Q08945	SSRP1	0	0.610797	0.0823511	0	0	0	0	0	0.306851	0	0	CHROMATIN
Q08AM6	VAC14	0.267589	0	0.0510558	0	0	0	0	0.403316	0.27804	0	0	NUCLEOLUS
Q08J23	NSUN2	0	0	0.602764	0	0	0	0	0	0.397236	0	0	CYTOSOL
Q09028	RBBP4	0	0.157514	0.336042	0	0	0	0	0	0.506444	0	0	NUCLEUS
Q09161	NCBP1	0	0	0.352296	0	0	0	0	0	0.647704	0	0	NUCLEUS
Q09328	MGAT5	0	0	0	0	0.427405	0	0	0	0	0	0.572595	PLASMA MEMBRANE
Q09472	EP300	0.192263	0	0	0	0	0	0	0.448472	0.359266	0	0	NUCLEOLUS
Q09666	AHNAK	0	0	0	0	0.364998	0.509663	0	0	0	0	0.125339	LYSOSOME
Q0JRZ9	FCHO2	0	0	0.566438	0	0	0	0	0	0	0	0.433562	CYTOSOL
Q0VD83-4	APOBR	0	0	1	0	0	0	0	0	0	0	0	CYTOSOL
Q0VDF9	HSPA14	0.188036	0.29627	0.0868562	0	0	0	0	0	0.428837	0	0	NUCLEUS
Q10469	MGAT2	0	0	0	0.537525	0.462475	0	0	0	0	0	0	ENDOPLASMIC RETICULUM
Q10471	GALNT2	0	0	0	0	1	0	0	0	0	0	0	GOLGI APPARATUS
Q10472	GALNT1	0	0	0	0.535097	0.464903	0	0	0	0	0	0	ENDOPLASMIC RETICULUM
Q10567		0.313477	0	0.0935134	0	0	0.59301	0	0	0	0	0	LYSOSOME
Q10567-3		0	0	0.0778369	0	0	0.726242	0	0	0	0	0.195922	LYSOSOME
Q10570	CPSF1	0	0	0	0	0	0	0	0.320095	0.679905	0	0	NUCLEUS
Q10588	BST1	0	0	0	0	0	0	0	0	0	0	1	PLASMA MEMBRANE
Q10589	BST2	0	0	0	0	0	0.378865	0	0	0	0	0.621135	PLASMA MEMBRANE
Q10713	PMPCA	0	0	0	0	0	0	1	0	0	0	0	MITOCHONDRIA
Q11201	ST3GAL1	0	0	0	0	0.450415	0	0	0	0	0	0.549585	PLASMA MEMBRANE
Q12767-2		0	0	0	0	0	0.279284	0	0	0	0	0.720716	PLASMA MEMBRANE
Q12768	KIAA0196	0	0	0.077256	0.341029	0.260049	0.321666	0	0	0	0	0	ENDOPLASMIC RETICULUM
Q12769	NUP160	0	0.322268	0.331027	0	0	0	0	0	0.346705	0	0	NUCLEUS
Q12770	SCAP	0	0	0	0.293631	0.299916	0.339439	0	0	0	0	0.0670136	LYSOSOME
Q12772	SREBF2	0	0	0	0.485608	0.514392	0	0	0	0	0	0	GOLGI APPARATUS
Q12788	TBL3	0	0	0	0	0	0	0	1	0	0	0	NUCLEOLUS
Q12792		0	0	0.767203	0	0	0	0	0	0	0	0.232797	CYTOSOL
Q12797	ASPH	0.259294	0	0	0.740706	0	0	0	0	0	0	0	ENDOPLASMIC RETICULUM
Q12800		0.286211	0.377828	0.109019	0	0	0	0	0	0.226942	0	0	CHROMATIN
Q12824		0	1	0	0	0	0	0	0	0	0	0	CHROMATIN
Q12830	BPTF	0	1	0	0	0	0	0	0	0	0	0	CHROMATIN
Q12834	CDC20	0.388499	0.611501	0	0	0	0	0	0	0	0	0	CHROMATIN
Q12846	STX4	0	0	0	0	0	0.599217	0	0	0	0	0.400783	LYSOSOME
Q12849	GRSF1	0	0	0	0	0	0	0.705178	0	0	0.294822	0	MITOCHONDRIA
Q12874	SF3A3	0	0	0.0645814	0	0	0	0	0	0.935419	0	0	NUCLEUS
Q12882	DPYD	0	0	1	0	0	0	0	0	0	0	0	CYTOSOL
Q12894-2		1	0	0	0	0	0	0	0	0	0	0	40S/60S RIBOSOME
Q12904-2	AIMP1	0	0	0.71828	0	0	0	0	0	0.28172	0	0	CYTOSOL
Q12905	ILF2	0	0	0.111403	0	0	0	0	0	0.888597	0	0	NUCLEUS
Q12906-7	ILF3	0	0	0.0550463	0	0	0	0	0	0.944954	0	0	NUCLEUS
Q12907	LMAN2	0	0	0	0.548631	0	0.451369	0	0	0	0	0	ENDOPLASMIC RETICULUM
Q12912	LRMP	0	0	0	0.624058	0	0.375942	0	0	0	0	0	ENDOPLASMIC RETICULUM
Q12913	PTPRJ	0	0	0	0	0	0	0	0	0	0	1	PLASMA MEMBRANE
Q12931	TRAP1	0	0	0	0	0	0	1	0	0	0	0	MITOCHONDRIA
Q12933-2	TRAF2	0.35182	0	0.64818	0	0	0	0	0	0	0	0	CYTOSOL
Q12959-4		0	0	0	0	0	0	0	0	0	0	1	PLASMA MEMBRANE
Q12965	MYO1E	0	0	0.449005	0	0	0	0	0	0	0	0.550995	PLASMA MEMBRANE
Q12974		0	0	0	0	0	1	0	0	0	0	0	LYSOSOME
Q12979	ABR	0	0	0.19905	0	0	0	0	0	0	0	0.80095	PLASMA MEMBRANE
Q12981	BNIP1	0	0	0	0.553944	0.446057	0	0	0	0	0	0	ENDOPLASMIC RETICULUM
Q12983		0	0	0	0	0	0	1	0	0	0	0	MITOCHONDRIA
Q12986	NFX1	0.5244	0	0	0	0	0	0	0.4756	0	0	0	40S/60S RIBOSOME
Q12996	CSTF3	0	0	0	0	0	0	0	0.416934	0.583066	0	0	NUCLEUS
Q13011	ECH1	0	0	0	0	0	0	1	0	0	0	0	MITOCHONDRIA
Q13043	STK4	0	0	0.799124	0	0	0	0	0	0	0	0.200876	CYTOSOL
Q13057-2	COASY	0	0	0.630333	0	0	0	0	0	0.369667	0	0	CYTOSOL
Q13084	MRPL28	0	0	0	0	0	0	0.715488	0	0	0.284512	0	MITOCHONDRIA
Q13085-4	ACACA	0	0	0.51245	0	0	0	0	0	0.48755	0	0	CYTOSOL
Q13094	LCP2	0.283731	0	0.566303	0	0	0	0	0	0	0	0.149966	CYTOSOL
Q13098-7	GPS1	0	0	0.806914	0	0	0	0	0	0.193086	0	0	CYTOSOL
Q13107	USP4	0	0	1	0	0	0	0	0	0	0	0	CYTOSOL
Q13112		0	0.723737	0	0	0	0	0	0	0.276263	0	0	CHROMATIN
Q13123	IK	0	0	0	0	0	0	0	0.630165	0.369835	0	0	NUCLEOLUS
Q13129	RLF	0	1	0	0	0	0	0	0	0	0	0	CHROMATIN
Q13131-2	PRKAA1	0	0	0.677246	0	0	0	0	0	0	0	0.322754	CYTOSOL
Q13136	PPFIA1	0.277457	0	0.360509	0	0	0	0	0	0	0	0.362033	PLASMA MEMBRANE
Q13137-4	CALCOCO2	0	0	0.205727	0	0	0	0	0	0	0	0.794273	PLASMA MEMBRANE
Q13144	EIF2B5	0	0	0.70544	0	0	0	0	0	0.29456	0	0	CYTOSOL
Q13148	TARDBP	0	0	0.398814	0	0	0	0	0	0.601186	0	0	NUCLEUS
Q13151	HNRNPA0	0	0.355004	0	0	0	0	0	0	0.644996	0	0	NUCLEUS
Q13155	AIMP2	0	0	0.528747	0	0	0	0	0	0.471253	0	0	CYTOSOL
Q13162	PRDX4	0	0	0	0.530917	0	0.469083	0	0	0	0	0	ENDOPLASMIC RETICULUM
Q13177	PAK2	0	0	1	0	0	0	0	0	0	0	0	CYTOSOL
Q13185	CBX3	0	0.198333	0.234395	0	0	0	0	0	0.567271	0	0	NUCLEUS
Q13190	STX5	0.200795	0	0	0.424618	0.374586	0	0	0	0	0	0	ENDOPLASMIC RETICULUM
Q13200	PSMD2	0	0	0.603766	0	0	0	0	0	0.396234	0	0	CYTOSOL
Q13206	DDX10	0	0	0	0	0	0	0	0.773936	0.226064	0	0	NUCLEOLUS
Q13217	DNAJC3	0	0	0	0.613006	0	0.386994	0	0	0	0	0	ENDOPLASMIC RETICULUM
Q13232	NME3	0.29107	0	0	0.70893	0	0	0	0	0	0	0	ENDOPLASMIC RETICULUM
Q13242	SRSF9	0	0	0.0764662	0	0	0	0	0	0.923534	0	0	NUCLEUS
Q13243	SRSF5	0	0	0.119459	0	0	0	0	0	0.880541	0	0	NUCLEUS
Q13247	SRSF6	0	0	0.17189	0	0	0	0	0	0.82811	0	0	NUCLEUS
Q13263	TRIM28	0	0	0.160077	0	0	0	0	0	0.839923	0	0	NUCLEUS
Q13277	STX3	0	0	0	0	0	0.366302	0	0	0	0	0.633698	PLASMA MEMBRANE
Q13283	G3BP1	0.34996	0	0	0	0	0	0	0.326978	0.323062	0	0	40S/60S RIBOSOME
Q13287	NMI	0.225097	0.280829	0.0776759	0	0	0	0	0	0.416398	0	0	NUCLEUS
Q13310-3	PABPC4	0.251095	0	0.0636099	0	0	0	0	0	0.685295	0	0	NUCLEUS
Q13315	ATM	0.206735	0.793265	0	0	0	0	0	0	0	0	0	CHROMATIN
Q13325		0	0	0.701323	0	0	0	0	0	0.298677	0	0	CYTOSOL
Q13330-3		0	0.678759	0.0663596	0	0	0	0	0	0.254882	0	0	CHROMATIN
Q13347	EIF3I	0	0	0.341214	0	0	0	0	0	0.658786	0	0	NUCLEUS
Q13363		0	0	0.540135	0	0	0	0	0	0.459865	0	0	CYTOSOL
Q13370	PDE3B	0	0	0	0.501112	0.498888	0	0	0	0	0	0	ENDOPLASMIC RETICULUM
Q13393	PLD1	0	0	0	0	0	0.466266	0	0	0	0	0.533734	PLASMA MEMBRANE
Q13405	MRPL49	0	0	0	0	0	0	0.728077	0	0	0.271923	0	MITOCHONDRIA
Q13409-7		0.280888	0.306799	0.412312	0	0	0	0	0	0	0	0	CYTOSOL
Q13418	ILK	0	0	0.166431	0	0	0	0	0	0	0	0.833569	PLASMA MEMBRANE
Q13423	NNT	0	0	0	0	0	0	1	0	0	0	0	MITOCHONDRIA
Q13425	SNTB2	0	0	0	0	0	0	0	0	0	0	1	PLASMA MEMBRANE
Q13427	PPIG	0	0.243088	0	0	0	0	0	0.407885	0.349028	0	0	NUCLEOLUS
Q13428-4	TCOF1	0.620196	0.379804	0	0	0	0	0	0	0	0	0	40S/60S RIBOSOME
Q13435	SF3B2	0	0	0.0487791	0	0	0	0	0	0.951221	0	0	NUCLEUS
Q13438		0	0	0	1	0	0	0	0	0	0	0	ENDOPLASMIC RETICULUM
Q13442	PDAP1	0.186386	0	0.452503	0	0	0	0	0	0.361111	0	0	CYTOSOL
Q13443	ADAM9	0	0	0	0	0	0	0	0	0	0	1	PLASMA MEMBRANE
Q13445		0	0	0	1	0	0	0	0	0	0	0	ENDOPLASMIC RETICULUM
Q13451	FKBP5	0	0	1	0	0	0	0	0	0	0	0	CYTOSOL
Q13459	MYO9B	0.238095	0	0.600649	0	0	0	0	0	0	0	0.161256	CYTOSOL
Q13464	ROCK1	0	0	0.260017	0	0	0	0	0	0	0	0.739983	PLASMA MEMBRANE
Q13469		0.265238	0.495867	0.077926	0	0	0	0	0	0	0	0.160969	CHROMATIN
Q13488	TCIRG1	0	0	0	0	0	1	0	0	0	0	0	LYSOSOME
Q13492	PICALM	0	0	0	0	0	0.849783	0	0	0	0	0.150217	LYSOSOME
Q13496	MTM1	0.16288	0	0	0	0.240335	0.302775	0	0	0	0	0.29401	LYSOSOME
Q13501	SQSTM1	0	0	0.355956	0	0	0	0	0	0	0	0.644044	PLASMA MEMBRANE
Q13505	MTX1	0	0	0	0	0	0	0.701654	0	0	0.298346	0	MITOCHONDRIA
Q13510-2	ASAH1	0	0	0	0.317346	0	0.682654	0	0	0	0	0	LYSOSOME
Q13526	PIN1	0	0	0.766991	0	0	0	0	0	0.233009	0	0	CYTOSOL
Q13530		0	0	0	0	0	0.673677	0	0	0	0	0.326323	LYSOSOME
Q13535		0.193274	0.530603	0	0	0	0	0	0	0.276123	0	0	CHROMATIN
Q13541		0	0	0.91726	0	0	0	0	0	0	0	0.0827398	CYTOSOL
Q13547	HDAC1	0	0.329741	0.0998245	0	0	0	0	0	0.570434	0	0	NUCLEUS
Q13555-4		0.307574	0.601554	0.0908721	0	0	0	0	0	0	0	0	CHROMATIN
Q13557-8	CAMK2D	0.425801	0.432056	0.142143	0	0	0	0	0	0	0	0	CHROMATIN
Q13561-2	DCTN2	0	0	1	0	0	0	0	0	0	0	0	CYTOSOL
Q13563	PKD2	0	0	0	0.481202	0.327798	0	0	0	0	0	0.191001	ENDOPLASMIC RETICULUM
Q13568-2		0	0.611324	0.094514	0	0	0	0	0	0.294162	0	0	CHROMATIN
Q13571		0	0	0	0	0.280476	0.719524	0	0	0	0	0	LYSOSOME
Q13573	SNW1	0	0	0	0	0	0	0	0.794381	0.205619	0	0	NUCLEOLUS
Q13574		0	0	0.388879	0	0	0	0	0	0	0	0.611121	PLASMA MEMBRANE
Q13586	STIM1	0.256076	0	0	0.743924	0	0	0	0	0	0	0	ENDOPLASMIC RETICULUM
Q13596	SNX1	0	0	1	0	0	0	0	0	0	0	0	CYTOSOL
Q13601	KRR1	0	0	0	0	0	0	0	0.601465	0.398535	0	0	NUCLEOLUS
Q13608		0.308128	0.27195	0	0	0	0	0	0	0	0.419922	0	PEROXISOME
Q13616	CUL1	0	0	0.479712	0	0	0	0	0	0.520288	0	0	NUCLEUS
Q13617-2	CUL2	0	0	0.693625	0	0	0	0	0	0.306375	0	0	CYTOSOL
Q13618	CUL3	0.223104	0	0.264207	0	0	0	0	0	0.512688	0	0	NUCLEUS
Q13619	CUL4A	0	0.213369	0.303333	0	0	0	0	0	0.483298	0	0	NUCLEUS
Q13627-2	DYRK1A	0.343871	0	0.0898076	0	0	0	0	0.357942	0	0	0.20838	NUCLEOLUS
Q13630	TSTA3	0	0	1	0	0	0	0	0	0	0	0	CYTOSOL
Q13636	RAB31	0	0	0	0.350624	0.293542	0.355834	0	0	0	0	0	LYSOSOME
Q13637	RAB32	0	0	0	0.512957	0	0.487043	0	0	0	0	0	ENDOPLASMIC RETICULUM
Q13641	TPBG	0	0	0	0	0	0	0	0	0	0	1	PLASMA MEMBRANE
Q13642-4		0.308139	0	0.462415	0	0	0	0	0	0	0	0.229446	CYTOSOL
Q13671	RIN1	0	0	0.654871	0	0	0	0	0	0.245517	0	0.0996113	CYTOSOL
Q13724	MOGS	0	0	0	1	0	0	0	0	0	0	0	ENDOPLASMIC RETICULUM
Q13740-2	ALCAM	0	0	0	0	0	0	0	0	0	0	1	PLASMA MEMBRANE
Q13769	THOC5	0	0.374973	0	0	0	0	0	0.437102	0.187925	0	0	NUCLEOLUS
Q13795		0	0	0	0	0.323183	0	0	0	0	0	0.676817	PLASMA MEMBRANE
Q13823	GNL2	0.394131	0	0	0	0	0	0	0.605869	0	0	0	NUCLEOLUS
Q13825		0	0	0	0	0	0	1	0	0	0	0	MITOCHONDRIA
Q13838-2	DDX39B	0	0	0.131801	0	0	0	0	0	0.868198	0	0	NUCLEUS
Q13867		0	0	1	0	0	0	0	0	0	0	0	CYTOSOL
Q13873		0	0	0	0	0	0	0	0	0	0	1	PLASMA MEMBRANE
Q13884	SNTB1	0	0	0	0	0	0	0	0	0	0	1	PLASMA MEMBRANE
Q13895	BYSL	0	0	0	0	0	0	0	0.720143	0.279857	0	0	NUCLEOLUS
Q13907	IDI1	0	0	1	0	0	0	0	0	0	0	0	CYTOSOL
Q14004		0.222468	0	0	0	0	0	0	0.475001	0.302531	0	0	NUCLEOLUS
Q14008-3	CKAP5	0	1	0	0	0	0	0	0	0	0	0	CHROMATIN
Q14011	CIRBP	0	0.162883	0	0	0	0	0	0.290578	0.546539	0	0	NUCLEUS
Q14012		0	0	0.864032	0	0	0	0	0	0	0	0.135968	CYTOSOL
Q14019	COTL1	0	0	1	0	0	0	0	0	0	0	0	CYTOSOL
Q14055	COL9A2	0.678232	0	0.321768	0	0	0	0	0	0	0	0	40S/60S RIBOSOME
Q14088	RAB33A	0	0	0.0686738	0	0.37432	0.557006	0	0	0	0	0	LYSOSOME
Q14103-3		0	0	0.138592	0	0	0	0	0	0.861408	0	0	NUCLEUS
Q14108	SCARB2	0	0	0	0	0	1	0	0	0	0	0	LYSOSOME
Q14114-2		0	0	0	0	0	0	0	0	0	0	1	PLASMA MEMBRANE
Q14118	DAG1	0	0	0	0	0	0.357684	0	0	0	0	0.642316	PLASMA MEMBRANE
Q14126	DSG2	0	0	0	0	0	0	0	0	0	0	1	PLASMA MEMBRANE
Q14137	BOP1.00	0	0	0	0	0	0	0	0.612697	0.387303	0	0	NUCLEOLUS
Q14139-2	UBE4A	0	0	1	0	0	0	0	0	0	0	0	CYTOSOL
Q14141	2006-09-01	0.419628	0.580372	0	0	0	0	0	0	0	0	0	CHROMATIN
Q14142		0	0	0	0	0	0.705164	0	0	0	0	0.294836	LYSOSOME
Q14149	MORC3	0	0.79275	0	0	0	0	0	0	0.20725	0	0	CHROMATIN
Q14151		0	0	0	0	0	0	0	0.620971	0.379029	0	0	NUCLEOLUS
Q14152	EIF3A	0	0	0.212208	0	0	0	0	0	0.787792	0	0	NUCLEUS
Q14155-5	ARHGEF7	0.259566	0	0.576104	0	0	0	0	0	0	0	0.16433	CYTOSOL
Q14156	EFR3A	0	0	0	0	0	0	0	0	0	0	1	PLASMA MEMBRANE
Q14157-5	UBAP2L	0.347813	0	0	0	0	0	0	0.354527	0.297659	0	0	NUCLEOLUS
Q14160		0	0	0	0	0	0	0	0	0	0	1	PLASMA MEMBRANE
Q14161	GIT2	0	0	0.630867	0	0	0	0	0	0.369133	0	0	CYTOSOL
Q14165	MLEC	0	0	0	1	0	0	0	0	0	0	0	ENDOPLASMIC RETICULUM
Q14166	TTLL12	0	0	1	0	0	0	0	0	0	0	0	CYTOSOL
Q14168-4	MPP2	0	0	0	0	0	0	0	0	0	0	1	PLASMA MEMBRANE
Q14192	FHL2	0	0	0.798692	0	0	0	0	0	0	0	0.201308	CYTOSOL
Q14197	MRPL58	0	0	0	0	0	0	0.72521	0	0	0.27479	0	MITOCHONDRIA
Q14202		0	1	0	0	0	0	0	0	0	0	0	CHROMATIN
Q14203	DCTN1	0	0	1	0	0	0	0	0	0	0	0	CYTOSOL
Q14204	DYNC1H1	0	0.62746	0	0	0	0	0	0	0.37254	0	0	CHROMATIN
Q14232		0	0	1	0	0	0	0	0	0	0	0	CYTOSOL
Q14240-2	EIF4A2	0	0	0.29771	0	0	0	0	0	0.70229	0	0	NUCLEUS
Q14241	TCEB3	0.23809	0.53189	0	0	0	0	0	0	0.23002	0	0	CHROMATIN
Q14249	ENDOG	0	0	0	0	0	0	0.510873	0	0	0.489127	0	MITOCHONDRIA
Q14254	FLOT2	0	0	0	0	0	0.352342	0	0	0	0	0.647658	PLASMA MEMBRANE
Q14257-2	RCN2	0	0	0	0.522459	0	0.477541	0	0	0	0	0	ENDOPLASMIC RETICULUM
Q14258	TRIM25	1	0	0	0	0	0	0	0	0	0	0	40S/60S RIBOSOME
Q14289-2	PTK2B	0	0	0.628355	0	0	0	0	0	0	0	0.371645	CYTOSOL
Q14318-2		0	0	0	0.536888	0	0	0.463112	0	0	0	0	ENDOPLASMIC RETICULUM
Q14331	FRG1	0.212894	0.351326	0	0	0	0	0	0	0.435779	0	0	NUCLEUS
Q14344	GNA13	0	0	0	0	0	0.267814	0	0	0	0	0.732186	PLASMA MEMBRANE
Q14393	GAS6	0	0	0	0.375111	0.256143	0.368746	0	0	0	0	0	ENDOPLASMIC RETICULUM
Q14444	CAPRIN1	0.205732	0	0	0	0	0	0	0.323293	0.470974	0	0	NUCLEUS
Q14457		0.491468	0	0.10824	0	0	0	0	0	0	0	0.400292	40S/60S RIBOSOME
Q14493	SLBP	0	0	0.293932	0	0	0	0	0	0.706068	0	0	NUCLEUS
Q14498	RBM39	0	0	0	0	0	0	0	0	1	0	0	NUCLEUS
Q14517	FAT1	0	0	0	0	0.409271	0.367771	0	0	0	0	0.222959	GOLGI APPARATUS
Q14534		0.280428	0	0	0.719572	0	0	0	0	0	0	0	ENDOPLASMIC RETICULUM
Q14554	PDIA5	0	0	0	1	0	0	0	0	0	0	0	ENDOPLASMIC RETICULUM
Q14566	MCM6	0	0	0.606291	0	0	0	0	0	0.393709	0	0	CYTOSOL
Q14571		0	0	0	1	0	0	0	0	0	0	0	ENDOPLASMIC RETICULUM
Q14573	ITPR3	0	0	0	0.613151	0.386849	0	0	0	0	0	0	ENDOPLASMIC RETICULUM
Q14642		0	0	0	0	0	0	0	0	0	0	1	PLASMA MEMBRANE
Q14667	KIAA0100	0	0	0	0.591308	0.408692	0	0	0	0	0	0	ENDOPLASMIC RETICULUM
Q14677	CLINT1	0.22428	0.323693	0.0811305	0	0.260684	0	0	0	0	0	0.110213	CHROMATIN
Q14683	SMC1A	0	1	0	0	0	0	0	0	0	0	0	CHROMATIN
Q14684		0	0	0	0	0	0	0	1	0	0	0	NUCLEOLUS
Q14690	PDCD11	0	0	0	0	0	0	0	1	0	0	0	NUCLEOLUS
Q14694-2	USP10	0.196019	0	0.0841859	0	0	0	0	0	0.719795	0	0	NUCLEUS
Q14696	MESDC2	0	0	0	0.530444	0	0.469556	0	0	0	0	0	ENDOPLASMIC RETICULUM
Q14697		0	0	0.231957	0	0	0.55226	0	0	0	0	0.215782	LYSOSOME
Q14699	RFTN1	0	0	0	0	0	0	0	0	0	0	1	PLASMA MEMBRANE
Q14728		0	0	0	1	0	0	0	0	0	0	0	ENDOPLASMIC RETICULUM
Q14739	LBR	0	0	0	1	0	0	0	0	0	0	0	ENDOPLASMIC RETICULUM
Q14764	MVP	0	0	0	0	0	0	0	0.842901	0	0	0.157099	NUCLEOLUS
Q14814-4	MEF2D	0	0.770878	0	0	0	0	0	0	0.229122	0	0	CHROMATIN
Q14839-2	CHD4	0	1	0	0	0	0	0	0	0	0	0	CHROMATIN
Q14847	LASP1	0	0	0.486085	0	0	0	0	0	0	0	0.513915	PLASMA MEMBRANE
Q14914	PTGR1	0	0	1	0	0	0	0	0	0	0	0	CYTOSOL
Q14956	GPNMB	0	0	0	0	0	1	0	0	0	0	0	LYSOSOME
Q14964		0	0	0	0	0	1	0	0	0	0	0	LYSOSOME
Q14966	ZNF638	0	1	0	0	0	0	0	0	0	0	0	CHROMATIN
Q14974	KPNB1	0	0	0.819096	0	0	0	0	0	0.180904	0	0	CYTOSOL
Q14BN4	SLMAP	0	0	0	0.421929	0.227807	0.350264	0	0	0	0	0	ENDOPLASMIC RETICULUM
Q14C86-6	GAPVD1	0	0	1	0	0	0	0	0	0	0	0	CYTOSOL
Q14CX7		0.275064	0.382447	0	0	0	0	0	0	0.342489	0	0	CHROMATIN
Q15003	NCAPH	0.206971	0.558076	0	0	0	0	0	0	0.234952	0	0	CHROMATIN
Q15005	SPCS2	0	0	0	0.666072	0.333928	0	0	0	0	0	0	ENDOPLASMIC RETICULUM
Q15006	EMC2	0.35288	0	0	0.64712	0	0	0	0	0	0	0	ENDOPLASMIC RETICULUM
Q15007	WTAP	0	0	0	0	0	0	0	0.421967	0.578033	0	0	NUCLEUS
Q15008	PSMD6	0	0	0.643052	0	0	0	0	0	0.356947	0	0	CYTOSOL
Q15011	HERPUD1	0	0	0	0.296473	0.297003	0.2954	0	0	0	0	0.111125	GOLGI APPARATUS
Q15018	FAM175B	0	0	1	0	0	0	0	0	0	0	0	CYTOSOL
Q15019-2		0.494541	0.505459	0	0	0	0	0	0	0	0	0	CHROMATIN
Q15021	NCAPD2	0	0.658701	0	0	0	0	0	0	0.341299	0	0	CHROMATIN
Q15022	SUZ12	0	0.905478	0.094522	0	0	0	0	0	0	0	0	CHROMATIN
Q15024	EXOSC7	0	0.172122	0.0546396	0	0	0	0	0	0.773239	0	0	NUCLEUS
Q15025		0	0	0.0594866	0	0	0.377988	0	0	0	0	0.562525	PLASMA MEMBRANE
Q15029	EFTUD2	0	0	0	0	0	0	0	0	1	0	0	NUCLEUS
Q15031	LARS2	0	0	0	0	0	0	1	0	0	0	0	MITOCHONDRIA
Q15035	TRAM2	0	0	0	0	0.754902	0	0	0	0	0	0.245098	GOLGI APPARATUS
Q15041		0	0	0	0.463175	0.253041	0.283783	0	0	0	0	0	ENDOPLASMIC RETICULUM
Q15042	RAB3GAP1	0	0	1	0	0	0	0	0	0	0	0	CYTOSOL
Q15043	SLC39A14	0	0	0	0	0	0.716929	0	0	0	0	0.283071	LYSOSOME
Q15046-2	KARS	0	0	0.62464	0	0	0	0	0	0.37536	0	0	CYTOSOL
Q15050	RRS1	0.182131	0	0	0	0	0	0	0.817869	0	0	0	NUCLEOLUS
Q15052	ARHGEF6	0	0	0.651555	0	0	0	0	0	0.348445	0	0	CYTOSOL
Q15054		0	0	0.322353	0	0	0	0	0	0.677647	0	0	NUCLEUS
Q15057	ACAP2	0	0	0.583274	0	0	0	0	0	0	0	0.416726	CYTOSOL
Q15058		0.708555	0	0	0	0	0	0	0	0	0	0.291445	40S/60S RIBOSOME
Q15059	BRD3	0	1	0	0	0	0	0	0	0	0	0	CHROMATIN
Q15061	WDR43	0	0	0	0	0	0	0	1	0	0	0	NUCLEOLUS
Q15067-2	ACOX1	0	0	0	0	0	0	0.412596	0	0	0.587404	0	PEROXISOME
Q15070	OXA1L	0	0	0	0	0	0	1	0	0	0	0	MITOCHONDRIA
Q15075	EEA1	0	0	0.801738	0	0	0	0	0	0.198262	0	0	CYTOSOL
Q15080	NCF4	0	0	1	0	0	0	0	0	0	0	0	CYTOSOL
[truncated: 2,068 more rows]

## Sheet: Transition_ctrl_to_LPS
Accession/UniprotID	Genes	RL_Ribosome	RL_Chromatin	RL_Cytosol	RL_ER	RL_Golgi	RL_Lysosome	RL_Mitochondria	RL_Nucleolus	RL_Nucleus	RL_Peroxisome	RL_PM	RLS	P-Value	DS
A0AVT1	UBA6	0	0	0	0	0	0	0	0	0	0	0	0	0.454554	4.03381
A0FGR8-2	ESYT2	0	0	0	-0.154187	0.00327527	0.150912	0	0	0	0	0	0.308375	0.902145	5.50635
A0JNW5	UHRF1BP1L	0	0	0.295831	0	-0.28907	0	0	0	-0.455925	0	0.449164	1.48999	0.0443034	11.4939
A0MZ66-3	SHTN1	0	0	0.109546	0	0	0	0	0	0	0	-0.109546	0.219092	0.998798	6.87276
A1L0T0	ILVBL	0	0	0	-0.375395	0.375395	0	0	0	0	0	0	0.750789	0.291722	6.42857
A2RRP1	NBAS	0	0	0	-0.520693	0.247249	0.273444	0	0	0	0	0	1.04139	0.499594	5.73247
A2RUS2	DENND3	-0.00696465	0.231651	-0.145911	0	0	0	0	-0.464872	0.386096	0	0	1.2355	0.178813	5.18674
A2VDJ0-5	KIAA0922	0	0	0	0.0860297	0.157169	-0.243199	0	0	0	0	0	0.486398	0.388486	3.96006
A3KMH1	VWA8	0	0	0	0	0	0	0	0	0	0	0	0	0.257358	3.92559
A4D1E9	GTPBP10	0	0	0	0	0	0	0	0	0	0	0	0	0.101097	7.01418
A4D1P6	WDR91	0	0	-0.228528	0	0	0	0	0	0	0	0.228528	0.457057	0.964994	7.28978
A5YKK6	CNOT1	0	0	0	0	0	0	0	0	0	0	0	0	0.772109	5.53737
A6NC98	CCDC88B	0	0	0.231715	0	0	0	0	0	0	0	-0.231715	0.463429	0.814974	7.41906
A6NDG6	PGP	0	0	-0.093431	0	0	0	0	0	0	0	0.093431	0.186862	0.577526	5.61929
A6NHR9	SMCHD1	0	0	0	0	0	0	0	0	0	0	0	0	0.975167	5.27967
A6NJ78	METTL15	0	0	0	0	0	0	-0.373102	0	0	0.373102	0	0.746204	0.978063	5.58158
A8MVS5	HIDE1	0	0	0	0	0	0	0	0	0	0	0	0	0.513931	5.90525
A8MXV4	NUDT19	0	0	0	0	0	0	0.0674697	0	0	-0.0674696	0	0.134939	0.550122	8.5311
B0I1T2	MYO1G	0	0	0	0	0	0	0	0	0	0	0	0	0.447543	6.83607
C9JLW8	MCRIP1	0.553752	-0.355527	0	0	0	0	0	-0.322618	0.124392	0	0	1.35629	0.715401	6.38196
O00115	DNASE2	0	0	0	0	0	-0.132455	0	0	0	0	0.132455	0.264911	0.846561	7.4371
O00116	AGPS	0	0	0	0	0	0	0.253501	0	0	-0.253501	0	0.507002	0.999054	4.62075
O00142	TK2	0	0	0	0	0	0	0	0	0	0	0	0	0.322324	10.1722
O00148	DDX39A	0	0	-0.0507044	0	0	0	0	0	0.0507044	0	0	0.101409	0.681266	6.98806
O00151	PDLIM1	0	0	-0.10487	0	0	0	0	0	0	0	0.10487	0.209739	0.474902	7.9772
O00159-3	MYO1C	0	0	0	0	0	0	0	0	0	0	0	0	0.422591	6.4228
O00160	MYO1F	0	0	0	0	0	0	0	0	0	0	0	0	0.799007	7.00071
O00161	SNAP23	0	0	0	0	0	0	0	0	0	0	0	0	0.368256	6.99044
O00165-2	HAX1	0	0	0	0	0	0	0	0	0	0	0	0	0.91763	6.04971
O00170	AIP	0	0	0	0	0	0	0	0	0	0	0	0	0.720924	4.29596
O00178	GTPBP1	0.200168	0.240312	0	0	0	0	0	0	-0.44048	0	0	0.88096	0.325949	5.45553
O00182	LGALS9	0	0	0	0	0	0	0	0	0	0	0	0	0.375233	5.3964
O00186	STXBP3	0	0	0	0	0	0.257445	0	0	0	0	-0.257445	0.514889	0.975222	9.31379
O00193	SMAP	0	0	0	0	0	0	0	0	0	0	0	0	0.628293	6.19064
O00203	AP3B2	0	0	-0.203415	0	0	0	0	0	0.203415	0	0	0.406829	0.913565	6.96881
O00214-2	LGALS8	0	0	0	0	0	0	0	0	0	0	0	0	0.535001	6.1612
O00217	NDUFS8	0	0.254473	0	0	0	0	-0.543228	0	0	0.288755	0	1.08646	0.666642	6.0002
O00231-2	PSMD11	0	0	-0.0692472	0	0	0	0	0	0.0692471	0	0	0.138494	0.809959	5.49763
O00232	PSMD12	0	0	-0.0953971	0	0	0	0	0	0.0953971	0	0	0.190794	0.599628	5.00296
O00241	SIRPB1	0	0	0	0	0	0	0	0	0	0	0	0	0.840771	9.24142
O00264	PGRMC1	0.207032	0	0	-0.275945	0.0689133	0	0	0	0	0	0	0.55189	0.299447	7.9474
O00291	HIP1	-0.175486	0	0	0	0	-0.023185	0	0	0	0	0.198671	0.397341	0.812321	5.98789
O00299	CLIC1	0	0	0	0	0	0	0	0	0	0	0	0	0.689402	4.95256
O00303	EIF3F	0	0	-0.270317	0	0	0	0	0	0.270316	0	0	0.540633	0.990078	4.00562
O00308	WWP2	0	0	0	0	-0.237342	0	0	0	0	0	0.237341	0.474683	0.854045	7.16048
O00329	PIK3CD	0.243389	0.286412	-0.183172	0	0	0	0	0	-0.346629	0	0	1.0596	0.794132	6.86639
O00330	PDHX	0	0	0	0	0	0	0	0	0	0	0	0	0.707377	7.73478
O00391	QSOX1	0	0	0	0	-0.0557153	0.183062	0	0	0	0	-0.127347	0.366124	0.591426	10.7072
O00400	SLC33A1	0	0	0	-0.0768078	0.0768078	0	0	0	0	0	0	0.153616	0.426861	4.19595
O00410-3	IPO5	0	0	-0.373976	0	0	0	0	0	0.373976	0	0	0.747952	0.396607	4.28544
O00411	POLRMT	0	0	0	0	0	0	0	0	0	0	0	0	0.331506	9.15563
O00422	SAP18	0	0	0	0	0	0	0	0.317555	-0.317555	0	0	0.63511	0.471393	9.03364
O00442-2	RTCA	0	0	0.0592489	0	0	0	0	0	-0.0592489	0	0	0.118498	0.602382	7.72591
O00443	PIK3C2A	-0.091818	0	0	-0.31408	-0.101478	0.333469	0	0	0	0	0.173907	1.01475	0.796798	8.93226
O00461	GOLIM4	0	0	0	0.584778	-0.584778	0	0	0	0	0	0	1.16956	0.477299	7.99209
O00468	AGRN	-0.15241	0	0	0	0.0815819	0.149365	0	0	0	0	-0.0785368	0.461894	0.822408	7.24128
O00471	EXOC5	0	0	0	0	-0.196954	0.573412	0	0	0	0	-0.376459	1.14682	0.243781	7.7016
O00483	NDUFA4	0	0	0	0	0	0	0	0	0	0	0	0	0.14454	8.95913
O00487	PSMD14	0	0	0.0256254	0	0	0	0	0	-0.0256254	0	0	0.0512508	0.706645	2.90499
O00522	KRIT1	0	0	0.0492746	0	0	0	0	0	0	0	-0.0492746	0.0985491	0.622191	6.59298
O00541	PES1.00	0	0	0	0	0	0	0	0.144747	-0.144747	0	0	0.289495	0.775277	6.46823
O00559-2	EBAG9	0.253854	0	0	-0.27712	0.166117	-0.251443	0	0	0	0	0.108592	1.05713	0.142262	4.30247
O00566	MPHOSPH10	0	0	0	0	0	0	0	-0.265506	0.265506	0	0	0.531013	0.761103	6.27262
O00567	NOP56	0	0	0	0	0	0	0	0.233905	-0.233905	0	0	0.467809	0.801003	6.4896
O00571	DDX3X	0.0498371	0	0	0	0	0	0	-0.126386	0.076549	0	0	0.252772	0.845776	7.07549
O00584	RNASET2	0	0	0	0	0	-0.168384	0	0	0	0	0.168384	0.336767	0.528832	8.30914
O00743-3	PPP6C	0	0	0	0	0	0	0	0	0	0	0	0	0.646721	3.82065
O00748	CES2	-0.18569	0	0	-0.178656	0	0.23498	0	0	0	0	0.129366	0.72869	0.912025	5.28323
O00754	MAN2B1	0	0	0	0	0	0	0	0	0	0	0	0	0.614041	8.33795
O00764	PDXK	0	0	0	0	0	0	0	0	0	0	0	0	0.762742	4.36188
O00767	SCD	-0.139304	0	0	0.303749	0.194416	-0.222422	0	0	0	0	-0.136438	0.99633	0.915267	5.65399
O14497	ARID1A	0	-0.238134	0	0	0	0	0	0	0.238134	0	0	0.476267	0.425591	7.52929
O14523	C2CD2L	-0.174832	0	0	-0.123216	0.130886	0.167162	0	0	0	0	0	0.596096	0.857697	7.19108
O14545	TRAFD1	0	0	0	0	0	0	0	0	0	0	0	0	0.708441	6.14876
O14578-4	CIT	0.340147	0	0	0	-0.0130317	0	0	0	0	0	-0.327116	0.680294	0.94966	6.08224
O14579	COPE	0	0	-0.0361949	0	0	0	0	0	0.0361948	0	0	0.0723897	0.470989	3.97309
O14617-5	AP3D1	0	0	-0.202775	0	0	0	0	0	0.202775	0	0	0.40555	0.337818	4.04988
O14647	CHD2	0	0	0	0	0	0	0	0	0	0	0	0	0.691569	5.44651
O14653-2	GOSR2	0	0	0	0.0172661	-0.017266	0	0	0	0	0	0	0.0345321	0.254392	6.17584
O14656	TOR1A	0	0	0	-0.0920328	-0.0137303	0.105763	0	0	0	0	0	0.211526	0.25828	6.9144
O14657	TOR1B	-0.222102	0	0	0.13267	0	0.0894317	0	0	0	0	0	0.444204	0.281156	6.37896
O14672	ADAM10	0	0	0	0	-0.198996	0	0	0	0	0	0.198996	0.397992	0.666761	6.74694
O14681	EI24	-0.225266	0	0	-0.261082	0.486348	0	0	0	0	0	0	0.972695	0.600523	5.00652
O14683	TP53I11	0	0	0	-0.280424	0.412638	-0.317349	0	0	0	0	0.185134	1.19554	0.527908	4.68685
O14734	ACOT8	-0.162147	0	0	-0.229589	0	0	0.270739	0	0	0.120997	0	0.783471	0.503991	4.44572
O14735	CDIPT	0	0	0	-0.482628	0	0.482628	0	0	0	0	0	0.965256	0.922072	6.78771
O14737	PDCD5	0	0	0	0	0	0	0	0	0	0	0	0	0.557017	7.11809
O14744	PRMT5	0	0	0	0	0	0	0	0	0	0	0	0	0.572098	5.11499
O14745	SLC9A3R1	0	0	-0.0724932	0	0	0	0	0	0	0	0.0724932	0.144986	0.830381	13.4464
O14773	TPP1	0	0	0	0	0	0.132692	0	0	0	0	-0.132692	0.265384	0.609184	9.29439
O14776	TCERG1	-0.104027	-0.446104	0	0	0	0	0	0.276583	0.190001	0	0.0835476	1.10026	0.746896	5.23962
O14777	NDC80	0.21372	-0.189841	0.0815028	0	0	0	0	0	0.288298	0	-0.393679	1.16704	0.965863	8.06455
O14818	PSMA7	0	0	0	0	0	0	0	0	0	0	0	0	0.583189	5.65075
O14841	OPLAH	0	0	0	0	0	0	0	0	0	0	0	0	0.533707	5.59286
O14874	BCKDK	0	0	0	0	0	0	-0.299982	0	0	0.299982	0	0.599964	0.728591	4.87543
O14879	IFIT3	0	0	0	0	0	0	0	0	0	0	0	0	0.878008	8.42739
O14880	MGST3	0	0	0	0	0	0	-0.0547539	0	0	0.054754	0	0.109508	0.497896	4.99684
O14910	LIN7A	0	0	0	0	0	0.0171464	0	0	0	0	-0.0171463	0.0342927	0.664255	11.7264
O14920	IKBKB	0	0	-0.445088	0	0	0	0	0	0.445088	0	0	0.890176	0.0444665	11.419
O14925	TIMM23B	0	0	0	0	0	0	0	0	0	0	0	0	0.63802	7.35838
O14949	UQCRQ	0	0	0	0	0	0	-0.287581	0	0	0.287581	0	0.575161	0.729332	6.78863
O14950	MYL12B	0	0	0	0	0	0	0	0	0	0	0	0	0.674745	5.95694
O14964	HGS	0	0	-0.0111176	0	0	-0.248237	0	0	0	0	0.259355	0.51871	0.96673	6.15557
O14966	RAB29	0	0	0	0.0866125	-0.276281	0.189669	0	0	0	0	0	0.552562	0.46631	7.01645
O14967	CLGN	0	0	0	0.221349	0.165684	-0.182277	0	0	0	0	-0.204756	0.774065	0.997141	5.43812
O14972	DSCR3	0	0	0	0	0	-0.136307	0	0	0	0	0.136307	0.272614	0.822229	12.5642
O14975	SLC27A2	0	0	0	0.517167	-0.345559	0	0	0	0	0	-0.171608	1.03433	0.955057	6.05753
O14976	GAK	0	0.215261	-0.52809	0	0	0	0	0	0.31283	0	0	1.05618	0.943687	4.41977
O14980	XPO1	0	0	0.387542	0	0	0	0	0	-0.387542	0	0	0.775083	0.275329	5.56116
O14994	SYN3	0.110213	0	0.0966461	0	0	0	0	0	0	0	-0.20686	0.413719	0.754935	6.02783
O15027-5	SEC16A	-0.0384967	0.237389	-0.0877128	0	0	0	0	0	-0.111179	0	0	0.474778	0.939111	7.975
O15031	PLXNB2	0	0	0	0	0	0	0	0	0	0	0	0	0.956884	6.57726
O15091	KIAA0391	0	0	0	0	0	0	0	0	0	0	0	0	0.678181	7.30983
O15118	NPC1	0	0	0	0	-0.245917	0.245917	0	0	0	0	0	0.491834	0.980867	8.20111
O15120	AGPAT2	0	0	0	-0.0247096	0.0247096	0	0	0	0	0	0	0.0494192	0.702832	6.3297
O15121	DEGS1	0	0	0	0	0	0	0	0	0	0	0	0	0.749506	6.47225
O15126	SCAMP1	0	0	0	0	0	0.147337	0	0	0	0	-0.147337	0.294674	0.854262	8.70122
O15127	SCAMP2	0	0	0	0	0	0.0322452	0	0	0	0	-0.0322452	0.0644903	0.942895	8.69873
O15143	ARPC1B	0.44499	0	-0.222102	0	0	0	0	0	-0.222889	0	0	0.88998	0.808579	6.65926
O15144	ARPC2	0.2936	0	-0.184989	0	0	0	0	0	-0.108611	0	0	0.587199	0.689724	6.96314
O15145	ARPC3	0.366559	0	-0.291088	0	0	0	0	0	-0.572322	0	0.496851	1.72682	0.150207	10.6526
O15160	POLR1C	0	0.260706	-0.0425524	0	0	0	0	0	-0.218154	0	0	0.521413	0.293505	4.94271
O15173-2	PGRMC2	0	0	0	-0.244184	0.433533	0	-0.189348	0	0	0	0	0.867065	0.964449	9.22501
O15226-2	NKRF	0	0	0	0	0	0	0	0	0	0	0	0	0.568413	6.13945
O15228	GNPAT	0	0	0	0	0	0	0.446622	0	0	-0.446622	0	0.893243	0.754706	5.15116
O15254	ACOX3	0	0	0	0	0	0	0.192698	0	0	-0.192698	0	0.385396	0.416417	4.89122
O15260	SURF4	0	0	0	-0.0811147	-0.0197601	0.100875	0	0	0	0	0	0.20175	0.683131	5.61412
O15269	SPTLC1	0	0	0	-0.111053	0.379883	-0.268829	0	0	0	0	0	0.759766	0.657987	5.12962
O15270	SPTLC2	0	0	0	-0.299868	0.268206	0.0316618	0	0	0	0	0	0.599736	0.667384	6.21218
O15294	OGT	0	0	0.00356084	0	0	0	0	0	-0.0035609	0	0	0.00712174	0.611272	3.1744
O15321	TM9SF1	0	0	0	0.353265	-0.675383	0.322118	0	0	0	0	0	1.35077	0.190281	10.4431
O15347	HMGB3	0	0	0	0	0	0	0	0	0	0	0	0	0.882498	6.27888
O15355	PPM1G	0	0	0.274782	0	0	0	0	0	-0.274782	0	0	0.549564	0.477224	4.44676
O15357	INPPL1	0.19868	0	0.211786	0	0	0	0	0	-0.585232	0	0.174766	1.17046	0.417969	9.19656
O15371	EIF3D	0	0	-0.174207	0	0	0	0	0	0.174207	0	0	0.348414	0.893283	7.01092
O15372	EIF3H	0	0	-0.197094	0	0	0	0	0	0.197094	0	0	0.394188	0.731184	6.07027
O15382	BCAT2	0	0	0	0	0	0	0	0	0	0	0	0	0.622174	6.47883
O15394	NCAM2	0	0	0	0	0	0	0	0	0	0	0	0	0.454846	6.24647
O15400	STX7	0	0	0	0	0	-0.0569904	0	0	0	0	0.0569904	0.113981	0.690999	5.54001
O15427	SLC16A3	0	0	0	0	-0.221471	0.622078	0	0	0	0	-0.400607	1.24416	0.0883308	9.79106
O15439	ABCC4	0	0	0	0	0	-0.199732	0	0	0	0	0.199732	0.399463	0.968141	8.01155
O15446-2	CD3EAP	0	0	0	0	0	0	0	0	0	0	0	0	0.772764	6.48306
O15479	MAGEB2	0.609767	0	0	0	0	0	0	-0.348385	0	-0.261382	0	1.21953	0.769932	6.6646
O15511	ARPC5	0.2733	0	-0.330602	0	0	0	0	0	0.0573017	0	0	0.661203	0.595752	8.40701
O15523	DDX3Y	0.0744589	0	0	0	0	0	0	-0.101147	0.0266882	0	0	0.202294	0.807499	7.86255
O15533-3	TAPBP	-0.140224	0	0	-0.337576	0.347926	-0.314556	0	0	0	0	0.444431	1.58471	0.855803	7.2461
O15553	MEFV	0.323009	-0.4345	0	0	0	0	0	0	0	0	0.111492	0.869001	0.594859	4.3089
O43143	DHX15	0	0	-0.0115606	0	0	0	0	0	0.0115607	0	0	0.0231213	0.886492	4.94371
O43169	CYB5B	0	0	0	-0.337723	0.337723	0	0	0	0	0	0	0.675445	0.516784	6.65126
O43175	PHGDH	0	0	0	0	0	0	0	0	0	0	0	0	0.828389	5.86298
O43181	NDUFS4	-0.183377	0	0	0	0	0	-0.0983579	0	0	0.281735	0	0.56347	0.558218	10.6351
O43237	DYNC1LI2	0.241073	-0.505319	0.102469	0	0	0	0	0	0	0	0.161777	1.01064	0.893608	5.21777
O43242	PSMD3	0	0	0.146662	0	0	0	0	0	-0.146662	0	0	0.293325	0.95144	4.49376
O43264	ZW10	-0.329553	0	-0.210134	0.539688	0	0	0	0	0	0	0	1.07938	0.886784	8.30838
O43290	SART1	0	0	0	0	0	0	0	-0.00126523	0.0012652	0	0	0.00253043	0.76119	9.44784
O43292	GPAA1	0	0	0	-0.203786	0.428845	-0.225059	0	0	0	0	0	0.85769	0.486309	4.33111
O43293	DAPK3	-0.611174	0	0	0	0.42577	0	0	0	0	0	0.185404	1.22235	0.633207	7.24492
O43314	PPIP5K2	0.185221	-0.363713	0.154688	0	0	0	0	0	-0.152544	0	0.176348	1.03251	0.783319	6.93238
O43390	HNRNPR	0	0.242919	-0.183384	0	0	0	0	0	-0.0595351	0	0	0.485838	0.726974	5.11358
O43395	PRPF3	0	0	0	0	0	0	0	0.045191	-0.0451909	0	0	0.0903819	0.460167	7.63993
O43396	TXNL1	0	0	-0.282951	0	0	0	0	0	0.282951	0	0	0.565902	0.54096	3.42661
O43399-7	TPD52L2	0	0	0	0	0	0	0	0	0	0	0	0	0.692015	5.19569
O43402	EMC8	-0.256356	0	0	-0.205773	0.462129	0	0	0	0	0	0	0.924259	0.478288	6.09938
O43427	FIBP	0	0	-0.142364	0	-0.273432	0.0867677	0	0	0	0	0.329028	0.831592	0.838334	7.24277
O43432-3	EIF4G3	0.343205	0	0	0	0	0	0	-0.35955	0.0163447	0	0	0.719099	0.564311	5.38174
O43447	PPIH	0	0	0.11486	0	0	0	0	0	-0.11486	0	0	0.229719	0.11473	7.67482
O43464	HTRA2	0	0	0	0	0	0	0	0	0	0	0	0	0.582913	7.13398
O43488	AKR7A2	-0.280015	0	0.00893372	0	0	0	0	0	0.271081	0	0	0.56003	0.244438	4.29072
O43491	EPB41L2	0	0	0	0	0	0	0	0	0	0	0	0	0.312423	5.75227
O43493	TGOLN2	0	0	0	0	-0.273812	0.184762	0	0	0	0	0.0890495	0.547623	0.901434	9.03049
O43504	LAMTOR5	0	0	-0.140386	0	0	0.171048	0	0	0	0	-0.0306622	0.342096	0.564991	7.8431
O43516	WIPF1	0	0	0.091543	0	0	0	0	0	0	0	-0.0915429	0.183086	0.771755	7.21745
O43566	RGS14	0	0	0.0348258	0	0	0	0	0	0	0	-0.0348258	0.0696516	0.431058	3.72583
O43583	DENR	0	-0.0509061	0.0523949	0	0	0	0	0	-0.00148886	0	0	0.10479	0.443045	4.58798
O43586	PSTPIP1	0	0	0	0	-0.115449	0	0	0	0	0	0.115449	0.230898	0.73308	9.18414
O43615	TIMM44	0	0	0	0	0	0	0	0	0	0	0	0	0.504441	7.00852
O43617	TRAPPC3	0	0	-0.519341	0	0	0	0	0	0	0	0.519341	1.03868	0.850781	8.4267
O43633	CHMP2A	0	0	-0.50888	0	0	0.355549	0	0	0	0	0.153332	1.01776	0.218029	11.4165
O43639	NCK2	0	0	0.27747	0	0	0	0	0	0	0	-0.27747	0.55494	0.676626	6.4906
O43660	PLRG1	-0.0387929	0.151722	0	0	0	0	0	0.0672801	-0.180209	0	0	0.438004	0.367029	3.80412
O43670-4	ZNF207	0.243198	-0.267429	0	0	0	0	0	0.0861528	-0.0619219	0	0	0.658702	0.831019	7.68877
O43674	NDUFB5	0	0	0	0	0	0	0	0	0	0	0	0	0.315075	8.65814
O43676	NDUFB3	0	0	0	0	0	0	0	0	0	0	0	0	0.839171	5.27903
O43678	NDUFA2	0	0.185578	0	0	0	0	-0.477204	0	0	0.291626	0	0.954408	0.401651	7.04533
O43684-2	BUB3	0	0	0	0	0	0	0	0.372708	-0.372708	0	0	0.745417	0.509207	4.78664
O43707	ACTN4	0	0	-0.0637274	0	0	0	0	0	0	0	0.0637274	0.127455	0.522878	5.05008
O43708	GSTZ1	-0.266911	0	-0.22907	0	0	0	0.495981	0	0	0	0	0.991963	0.785919	4.97461
O43715	TRIAP1	0	0	0	0	0	0	0	0	0	0	0	0	0.296819	7.56606
O43716	GATC	0	0	0	0	0	0	0	0	0	0	0	0	0.393007	7.13305
O43719	HTATSF1	0	0	-0.0658801	0	0	0	0	0	0.06588	0	0	0.13176	0.534882	2.71497
O43747	AP1G1	0	0	-0.891926	0.368453	0	0.523473	0	0	0	0	0	1.78385	0.381214	8.6766
O43760-2	SYNGR2	0	0	0	0	0	-0.0627547	0	0	0	0	0.0627547	0.125509	0.809827	7.62817
O43768	ENSA	0	0	-0.0968816	0	0	0	0	0	0	0	0.0968816	0.193763	0.620871	4.69063
O43776	NARS	0	0	-0.258877	0	0	0	0	0	0.258877	0	0	0.517754	0.667747	3.76582
O43809	NUDT21	0	0	-0.222078	0	0	0	0	0	0.222078	0	0	0.444156	0.779088	5.5698
O43813	LANCL1	0.212797	0	-0.275122	0	0	0	0	0	0.0623252	0	0	0.550244	0.952002	7.85814
O43815	STRN	-0.283359	0	-0.00169712	0	0.560357	-0.275301	0	0	0	0	0	1.12071	0.378895	10.7768
O43818	RRP9	0	0	0	0	0	0	0	0.162554	-0.162554	0	0	0.325108	0.970612	5.68939
O43819	SCO2	0	0	0	0	0	0	-0.289135	0	0	0.289135	0	0.57827	0.026318	10.8679
O43824	GTPBP6	0	0	0	0	0	0	-0.325908	0	0	0.325908	0	0.651816	0.938408	3.02376
O43837	IDH3B	0	0	0	0	0	0	0	0	0	0	0	0	0.642417	8.68147
O43847-2	NRDC	0	0	0	0	0	0	0	0	0	0	0	0	0.648431	5.25519
O43852-3	CALU	-0.251634	0	0.328909	0.378861	-0.20494	-0.251197	0	0	0	0	0	1.41554	0.339091	3.81667
O43861	ATP9B	0	0	0	0	0	-0.274176	0	0	0	0	0.274176	0.548352	0.508109	7.37867
O43865	AHCYL1	0	0	-0.217167	0	0	0.0539947	0	0	0	0	0.163172	0.434334	0.572005	6.40311
O43914	TYROBP	0	0	0	0	0.0649544	0	0	0	0	0	-0.0649544	0.129909	0.60299	6.06778
O43920	NDUFS5	0	0	0	0	0	0	0	0	0	0	0	0	0.589309	8.68053
O60216	RAD21	0	-0.29698	0	0	0	0	0	0	0.29698	0	0	0.59396	0.720939	7.15072
O60220	TIMM8A	0	0	0	0	0	0	0	0	0	0	0	0	0.4814	4.52769
O60234	GMFG	0	0	0	0	0	0	0	0	0	0	0	0	0.263168	3.85562
O60262	GNG7	0	0	0	0	0	0	0	0	0	0	0	0	0.865894	5.12701
O60264	SMARCA5	0	0	0	0	0	0	0	0	0	0	0	0	0.815864	6.45849
O60271	SPAG9	0	0	0	0	0	0	0	0	0	0	0	0	0.643832	5.23334
O60306	AQR	0	0	-0.104314	0	0	0	0	0.0408946	0.0634199	0	0	0.208629	0.66391	4.29345
O60313-2	OPA1	0	0	0	0	0	0	0	0	0	0	0	0	0.56456	7.15836
O60315	ZEB2	0	-0.0621265	0	0	0	0	0	0	0.0621264	0	0	0.124253	0.984697	8.33
O60331-3	PIP5K1C	0	0	0.0530753	0	0	0	0	0	0	0	-0.0530754	0.106151	0.873251	7.71794
O60337	MARCH6	0	0	0	-0.0563292	0.367887	-0.311558	0	0	0	0	0	0.735774	0.670168	5.15618
O60341	KDM1A	0	0.0662979	0	0	0	0	0	0	-0.0662979	0	0	0.132596	0.596689	8.60301
O60353	FZD6	0	0	0	0	-0.205267	0	0	0	0	0	0.205267	0.410533	0.691721	5.92674
O60427	FADS1	0	0	0	-0.155849	0.43056	-0.274712	0	0	0	0	0	0.861121	0.818805	8.63807
O60476	MAN1A2	0	0	0	0.423455	-0.328119	0	-0.0953365	0	0	0	0	0.84691	0.717538	6.78407
O60488	ACSL4	0.204596	0	0	0.480181	-0.684777	0	0	0	0	0	0	1.36955	0.885362	8.25829
O60493	SNX3	0	0	0	0	0	0	0	0	0	0	0	0	0.0220143	11.5024
O60496	DOK2	0	0	0.0930055	0	0	0	0	0	0	0	-0.0930055	0.186011	0.124262	10.2511
O60503	ADCY9	0	0	0	0	0	0	0	0	0	0	0	0	0.499089	8.41007
O60504	SORBS3	0.0741168	0	0.160618	0	-0.37369	0	0	0	0	0	0.138956	0.74738	0.313603	7.95463
O60524	NEMF	0	0	-0.459613	0	0	0	0	0	0.459613	0	0	0.919227	0.82026	6.19321
O60568	PLOD3	-0.228306	0	0	-0.186136	0	0.414442	0	0	0	0	0	0.828883	0.995361	7.51255
O60573	EIF4E2	0.328102	0	-0.312745	0	0	0	0	0	-0.0153564	0	0	0.656203	0.471459	7.57347
O60603	TLR2	0	0	0	0	0	0.350519	0	0	0	0	-0.350519	0.701039	0.368348	12.298
O60610	DIAPH1	0	0	0	0	0	0	0	0	0	0	0	0	0.646547	5.55497
O60613	2015-09-01	-0.0270159	0	-0.198969	0.225985	0	0	0	0	0	0	0	0.45197	0.88869	8.1918
O60645-3	EXOC3	0	0	0	0	-0.118502	0.4599	0	0	0	0	-0.341398	0.919801	0.129396	10.8818
O60664	PLIN3	0	0	0	0	0	0	0	0	0	0	0	0	0.522879	4.56297
O60669	SLC16A7	0	0	0	0	0	0	0	0	0	0	0	0	0.596736	5.36062
O60701	UGDH	0	0	0.116555	0	0	0	0	0	-0.116555	0	0	0.23311	0.872296	3.93233
O60704	TPST2	0	0	0	0	-0.0292551	0	0	0	0	0	0.029255	0.0585101	0.772649	7.68664
O60762	DPM1	-0.0024775	0	0	0.00247753	0	0	0	0	0	0	0	0.00495502	0.298024	4.05516
O60763	USO1	0	0	0.0611594	0	0	0	0	0	-0.0611594	0	0	0.122319	0.556883	4.05693
O60783	MRPS14	0	0	0	0	0.412066	0	-0.412066	0	0	0	0	0.824132	0.863262	6.73731
O60784-2	TOM1	0	0	-0.107475	0	0	0	0	0	0	0	0.107475	0.21495	0.965423	6.55068
O60826	CCDC22	0	0	0	0	0	-0.00824374	0	0	0	0	0.00824373	0.0164875	0.150979	12.349
O60830-2	TIMM17B	0	0	0	0	0	0	-0.323913	0	0	0.323913	0	0.647826	0.669007	6.43726
O60832	DKC1	0	0.185056	0	0	0	0	0	-0.0298775	-0.155178	0	0	0.370111	0.692566	6.08517
O60841	EIF5B	0	0	-0.227642	0	0	0	0	0	0.227642	0	0	0.455284	0.76413	4.08489
O60858-3	TRIM13	0	0	0	0.105726	0.130313	0	0	0	0	0	-0.236039	0.472079	0.740536	6.48981
O60861	GAS7	0	0	0	0	0	0	0	0	0	0	0	0	0.601102	7.62493
O60869	EDF1	0	0	0	0	0	0	0	0	0	0	0	0	0.631315	5.43244
O60879-2	DIAPH2	0	-0.213521	0.0967469	0	-0.0849909	0	0	0	0	0	0.201765	0.597023	0.718778	6.31732
O60884	DNAJA2	0	0	-0.129333	0	0	0	0	0	0.129333	0	0	0.258665	0.894344	7.44469
O60885	BRD4	0	0	0	0	0	0	0	0	0	0	0	0	0.941886	7.98687
O60925	PFDN1	0	0	0	0	0	0	0	0	0	0	0	0	0.653942	6.83438
O60934	NBN	0	-0.0500694	0	0	0	0	0	0	0.0500694	0	0	0.100139	0.452032	4.38328
[truncated: 3,034 more rows]

## Sheet: Legend
Name	Meaning
[truncated: 6 more rows]
