# Supplementary material for: C-COMPASS: a user-friendly neural network tool profiles cell compartments at protein and lipid levels
Source: Nat Methods. 2025 Dec 4;23(1):118–30. doi: 10.1038/s41592-025-02880-3 (PMC12791020; doi:10.1038/s41592-025-02880-3)
Supplement: Supplementary file 17 — List of marker proteins used for experiments on humanized mouse liver and spatial proteomics and lipidomics on mouse liver. [file 41592_2025_2880_MOESM17_ESM.xlsx]

## Sheet: Markers
Genename	Organelle
AAGAB	Cytoplasm
AAK1	protein-complex
AARS1	Cytoplasm
AARS2	Mitochondria
AASS	Mitochondria
ABAT	Mitochondria
ABCA2	endosome-vesicle
ABCB10	Mitochondria
ABCB7	Mitochondria
ABCB8	Mitochondria
ABCD2	Peroxisome
ABCD3	Peroxisome
ABCE1	Translation
ABCF1	Translation
ABCF3	Cytoplasm
ABHD10	Mitochondria
ABHD11	Mitochondria
ABHD12	ER
ABHD3	PM
ABHD5	LD
ABHD6	ER
ABRAXAS2	Cytoplasm
ACAA1	Peroxisome
ACAA2	Mitochondria
ACACA	protein-complex
ACACB	protein-complex
ACAD11	Peroxisome
ACAD8	Mitochondria
ACAD9	Mitochondria
ACADL	Mitochondria
ACADM	Mitochondria
ACADS	Mitochondria
ACADSB	Mitochondria
ACADVL	Mitochondria
ACAT1	Mitochondria
ACAT2	Cytoplasm
ACER3	Golgi apparatus
ACHE	PM
ACLY	protein-complex
ACO1	Cytoplasm
ACO2	Mitochondria
ACOT1	Mitochondria
ACOT13	Mitochondria
ACOT2	Mitochondria
ACOT7	Cytoplasm
ACOT8	Peroxisome
ACOX1	Peroxisome
ACOX2	Peroxisome
ACOX3	Peroxisome
ACP2	Lysosome
ACP6	Mitochondria
ACSF2	Mitochondria
ACSF3	Mitochondria
ACSL3	ER
ACSL4	LD
ACSL5	ER
ACSL6	Mitochondria
ACSS3	Mitochondria
ACTL6A	Nucleus
ACTR10	protein-complex
ACTR1A	protein-complex
ACTR1B	protein-complex
ACYP1	Cytoplasm
ADAM10	ER
ADAM17	PM
ADAR	Nucleus
ADARB1	Nucleus
ADCY6	PM
ADH1B	Cytoplasm
ADH1C	Cytoplasm
ADIPOQ	ER
ADIPOR2	PM
ADIRF	Cytoplasm
ADK	Cytoplasm
ADNP	Nucleus
ADPGK	ER
ADRM1	protein-complex
ADSL	Cytoplasm
ADSS2	Cytoplasm
AFG1L	Mitochondria
AFTPH	Cytoplasm
AGA	Lysosome
AGFG2	Cytoplasm
AGK	Mitochondria
AGL	protein-complex
AGPAT2	ER
AGPAT3	ER
AGPAT5	Mitochondria
AGPS	Peroxisome
AHCY	Cytoplasm
AHCYL1	Cytoplasm
AHCYL2	Cytoplasm
AHNAK	Golgi apparatus
AHSA1	Cytoplasm
AIDA	Cytoplasm
AIFM1	Mitochondria
AIP	Cytoplasm
AK1	Cytoplasm
AK2	Mitochondria
AK3	Mitochondria
AK4	Mitochondria
AKAP1	Mitochondria
AKAP10	Cytoplasm
AKAP11	Cytoplasm
AKAP12	Cytoplasm
AKAP9	protein-complex
AKR1A1	Cytoplasm
AKR1B1	Cytoplasm
AKR1B15;AKR1B15;AKR1B10	Cytoplasm
AKR1C2	Cytoplasm
AKR1C3	Cytoplasm
AKR7A2	Cytoplasm
AKT1S1	protein-complex
AKT2	Cytoplasm
ALAD	protein-complex
ALAS1	Mitochondria
ALDH18A1	Mitochondria
ALDH1A1	Cytoplasm
ALDH1B1	Mitochondria
ALDH1L1	Cytoplasm
ALDH2	Mitochondria
ALDH3A2	ER
ALDH4A1	Mitochondria
ALDH5A1	Mitochondria
ALDH6A1	Mitochondria
ALDH7A1	Mitochondria
ALDH9A1	Cytoplasm
ALDOA	Cytoplasm
ALG1	ER
ALG11	ER
ALG12	ER
ALG14	ER
ALG2	ER
ALG3	ER
ALG6	ER
ALG8	ER
ALKBH7	Mitochondria
ALPL	PM
ALYREF	Nucleus
AMACR	Peroxisome
AMFR	ER
AMPD2	protein-complex
AMPH	Cytoplasm
ANGPTL8	Golgi apparatus
ANKIB1	Cytoplasm
ANKLE2	ER
ANKMY2	Cytoplasm
ANKRD27	endosome-vesicle
ANKRD28	protein-complex
ANKRD35	PM
ANO10	ER
ANPEP	PM
ANXA1	Cytoplasm
ANXA4	Cytoplasm
ANXA6	Cytoplasm
AOC2	PM
AP1G1	endosome-vesicle
AP1M1	endosome-vesicle
AP1S2	protein-complex
AP2A2	endosome-vesicle
AP3B1	protein-complex
AP3D1	protein-complex
AP3S1	protein-complex
AP4B1	endosome-vesicle
AP5S1	Cytoplasm
APBB1IP	Cytoplasm
APEH	protein-complex
APEX1	Translation
API5	Nucleus
APMAP	ER
APOL2	ER
APOO	Mitochondria
APOOL	Mitochondria
APP	Golgi apparatus
APRT	Cytoplasm
AQR	Nucleus
ARCN1	endosome-vesicle
ARF3;ARF1	Cytoplasm
ARFGAP3	Cytoplasm
ARFRP1	Golgi apparatus
ARHGAP17	Cytoplasm
ARHGAP5	Cytoplasm
ARHGDIA	Cytoplasm
ARHGEF1	Cytoplasm
ARHGEF10	Nucleus
ARHGEF7	protein-complex
ARL6IP1	ER
ARL6IP5	ER
ARL8A	endosome-vesicle
ARMC10	Mitochondria
ARMC6	Cytoplasm
ARMC8	protein-complex
ARMCX1	Mitochondria
ARPC1B	endosome-vesicle
ARPC5	Cytoplasm
ARSA	Lysosome
ARSB	Lysosome
ARSG	Lysosome
ASAH1	Lysosome
ASCC1	Translation
ASCC2	Translation
ASCC3	Translation
ASL	Cytoplasm
ASMTL	Cytoplasm
ASNS	Cytoplasm
ASPA	Cytoplasm
ASPH	ER
ASS1	Cytoplasm
ATAD1	Mitochondria
ATAD3A	Mitochondria
ATAD3B	Mitochondria
ATG13	Cytoplasm
ATG3	Cytoplasm
ATG4B	Cytoplasm
ATG7	Cytoplasm
ATIC	Cytoplasm
ATL2	ER
ATL3	ER
ATP11C	endosome-vesicle
ATP13A1	ER
ATP1A1	PM
ATP2A1	ER
ATP2A2	ER
ATP2B4	PM
ATP5F1A	Mitochondria
ATP5F1B	Mitochondria
ATP5F1C	Mitochondria
ATP5F1D	Mitochondria
ATP5IF1	Mitochondria
ATP5PD	Mitochondria
ATP5PF	Mitochondria
ATP6AP1	ER
ATP6V0C	endosome-vesicle
ATP6V0D1	endosome-vesicle
ATP6V1A	protein-complex
ATP6V1B2	endosome-vesicle
ATP6V1H	protein-complex
ATP7B	Golgi apparatus
ATP8B1	Cytoplasm
ATP9A	endosome-vesicle
ATP9B	endosome-vesicle
ATPAF1	Mitochondria
ATPAF2	Mitochondria
ATRN	PM
ATRX	Nucleus
ATXN10	Cytoplasm
AUH	Mitochondria
AZGP1	PM
B2M	Golgi apparatus
B2M	Golgi apparatus
B3GALT6	Golgi apparatus
B3GAT3	Golgi apparatus
B3GLCT	ER
B3GNT2	Golgi apparatus
B3GNT9	Golgi apparatus
B4GALT1	Golgi apparatus
B4GALT3	Golgi apparatus
B4GALT7	Golgi apparatus
BACE1	Golgi apparatus
BAG2	Cytoplasm
BAG3	Cytoplasm
BAG6	Cytoplasm
BANP	Nucleus
BAZ1B	Nucleus
BBS1	protein-complex
BCAP31	ER
BCAR3	Cytoplasm
BCAS2	Nucleus
BCAT2	Mitochondria
BCKDHA	Mitochondria
BCKDHB	Mitochondria
BCKDK	Mitochondria
BCL2	Mitochondria
BCL2L13	Mitochondria
BCL2L2	Nucleus
BCL9L	Nucleus
BCR	Cytoplasm
BDH1	Mitochondria
BECN1	Cytoplasm
BET1L	Golgi apparatus
BICD2	Cytoplasm
BID	Cytoplasm
BIN1	Cytoplasm
BIRC6	protein-complex
BLMH	Cytoplasm
BLOC1S3	Golgi apparatus
BLVRA	Cytoplasm
BLVRB	Cytoplasm
BLZF1	Golgi apparatus
BNIP1	ER
BNIP3	ER
BOK	ER
BOP1	Nucleus
BORCS7-ASMT;BORCS7	Cytoplasm
BPHL	Mitochondria
BPNT2	Golgi apparatus
BRAF	protein-complex
BRIX1	Nucleus
BSCL2	LD
BSG	PM
BST1	PM
BTD	ER
BTF3	Translation
BTN2A1	PM
BUB3	Nucleus
BZW1	Translation
C17orf75	Golgi apparatus
C18orf32	LD
C19orf12	Cytoplasm
C1GALT1	Golgi apparatus
C1orf109	Cytoplasm
C1orf198	Cytoplasm
C1QBP	Mitochondria
C20orf27	Cytoplasm
C3	PM
C8orf82	Mitochondria
CACNA2D1	ER
CACYBP	Cytoplasm
CAD	protein-complex
CADM3	PM
CALB2	Cytoplasm
CALCOCO2	Cytoplasm
CALM1;CALM2;CALM3	Cytoplasm
CALR	ER
CAMK1	Cytoplasm
CAMK2D	protein-complex
CAMKK2	Cytoplasm
CAMLG	ER
CAND1	Cytoplasm
CANT1	Golgi apparatus
CANX	ER
CAP1	protein-complex
CAP2	protein-complex
CAPN1	Cytoplasm
CAPN2	Cytoplasm
CAPNS1	Cytoplasm
CAPS	Cytoplasm
CAPZA2	Cytoplasm
CAPZB	protein-complex
CARMIL1	Cytoplasm
CARS1	Cytoplasm
CARS2	Mitochondria
CASC3	Nucleus
CASK	PM
CASP1	Cytoplasm
CASP4	Cytoplasm
CASP6	Cytoplasm
CASP8	protein-complex
CAST	Cytoplasm
CAT	Peroxisome
CAVIN1	PM
CAVIN2	LD
CAVIN3	LD
CBFB	Cytoplasm
CBL	Cytoplasm
CBR3	Cytoplasm
CBR4	Mitochondria
CC2D1A	Cytoplasm
CCAR1	Nucleus
CCAR2	Nucleus
CCDC115	ER
CCDC126	Golgi apparatus
CCDC127	Mitochondria
CCDC43	Cytoplasm
CCDC47	ER
CCDC50	Cytoplasm
CCDC51	Mitochondria
CCDC58	Mitochondria
CCDC8	Cytoplasm
CCDC9	Cytoplasm
CCDC90B	Mitochondria
CCDC93	endosome-vesicle
CCNK	Nucleus
CCPG1	ER
CCT2	protein-complex
CCT3	protein-complex
CCT4	protein-complex
CCT5	protein-complex
CCT6A	protein-complex
CCT7	protein-complex
CCT8	protein-complex
CD109	PM
CD151	PM
CD248	PM
CD276	PM
CD36	PM
CD44	PM
CD58	PM
CD59;ENSG00000284969;CD59;CD59	PM
CD63	PM
CD68	PM
CD82	PM
CDC37	Cytoplasm
CDC37L1	Cytoplasm
CDC42EP2	Cytoplasm
CDH13	PM
CDIPT	ER
CDK4	Cytoplasm
CDK5RAP1	Mitochondria
CDK5RAP3	ER
CDKN2C	Cytoplasm
CDR2L	Cytoplasm
CDV3	Cytoplasm
CEBPA	Nucleus
CEBPB	Nucleus
CENPV	Nucleus
CERS2	ER
CES1	ER
CES2	ER
CHCHD3	Mitochondria
CHCHD4	Mitochondria
CHCHD6	Mitochondria
CHD2	Nucleus
CHID1	ER
CHMP2A	Cytoplasm
CHMP2B	Cytoplasm
CHMP6	PM
CHORDC1	Cytoplasm
CHP1	ER
CHST3	Golgi apparatus
CIAO3	Cytoplasm
CIDEC	LD
CIRBP	Translation
CISD1	Mitochondria
CKAP4	ER
CKB	Cytoplasm
CKMT1B	Mitochondria
CKMT2	Mitochondria
CKS1B	Cytoplasm
CLCC1	ER
CLCN6	endosome-vesicle
CLIC1	Cytoplasm
CLIP1	Cytoplasm
CLN3;CLN3;ENSG00000261832;CLN3;CLN3;CLN3;CLN3;CLN3;CLN3;CLN3;CLN3	Lysosome
CLNS1A	protein-complex
CLP1	Nucleus
CLPB	Mitochondria
CLPP	Mitochondria
CLPTM1	ER
CLPTM1L	ER
CLPX	Mitochondria
CLTC	protein-complex
CLTCL1	endosome-vesicle
CLUH	endosome-vesicle
CLYBL	Mitochondria
CMC2	Mitochondria
CNDP2	Cytoplasm
CNIH4	ER
CNOT7	Nucleus
CNPY3	ER
CNPY4	ER
CNRIP1	Cytoplasm
CNST	PM
COA1	Mitochondria
COA6	Mitochondria
COA7	Mitochondria
COG1	protein-complex
COG3	protein-complex
COG4	protein-complex
COG5	protein-complex
COG7	protein-complex
COL5A2	PM
COL5A3	PM
COL6A1	PM
COL6A2	PM
COLGALT1	ER
COMMD3	protein-complex
COMMD8	Cytoplasm
COMT	ER
COPB1	endosome-vesicle
COPS2	protein-complex
COPS3	protein-complex
COPS5	protein-complex
COPS6	protein-complex
COPZ2	protein-complex
COQ10B	Mitochondria
COQ3	Mitochondria
COQ5	Mitochondria
COQ7	Mitochondria
COQ8A	Mitochondria
COQ8B	Mitochondria
COQ9	Mitochondria
COTL1	Cytoplasm
COX15	Mitochondria
COX18	Mitochondria
COX20	Mitochondria
COX4I1	Mitochondria
COX5A	Mitochondria
COX5B	Mitochondria
COX6A1	Mitochondria
COX7B	Mitochondria
CPE	Golgi apparatus
CPM	PM
CPNE3	Cytoplasm
CPOX	Mitochondria
CPPED1	Cytoplasm
CPT1A	Mitochondria
CPT1B	Mitochondria
CPT2	Mitochondria
CRABP2	Cytoplasm
CRADD	Cytoplasm
CRAT	Mitochondria
CRELD1	ER
CRELD2	ER
CRIP1	Cytoplasm
CRTAP	ER
CRYAB	Cytoplasm
CRYZ	Mitochondria
CRYZL1	Cytoplasm
CS	Mitochondria
CSDE1	Cytoplasm
CSK	Cytoplasm
CSPG4	PM
CSPG5	Golgi apparatus
CSTA	Cytoplasm
CSTB	Cytoplasm
CSTF1	Nucleus
CSTF2	Nucleus
CTBP2	Nucleus
CTBS	Lysosome
CTIF	Cytoplasm
CTNNB1	PM
CTNNBL1	Nucleus
CTNND1	PM
CTPS1	Cytoplasm
CTPS2	Cytoplasm
CTR9	Nucleus
CTSA	Lysosome
CTSB	Lysosome
CTSC	Lysosome
CTSD	Lysosome
CTSL	Lysosome
CTSZ	Lysosome
CTTN	Cytoplasm
CTTNBP2NL	protein-complex
CUL1	protein-complex
CUL2	protein-complex
CUL3	protein-complex
CUL4A	protein-complex
CUL5	Cytoplasm
CUL7	protein-complex
CUTC	Cytoplasm
CWC22	Nucleus
CYB5A	ER
CYB5B	LD
CYB5R1	Mitochondria
CYB5R3	ER
CYBRD1	PM
CYC1	Mitochondria
CYCS	Mitochondria
CYFIP1	protein-complex
CYP20A1	ER
CYP27A1	Mitochondria
CYP2U1	ER
CYP4F22	ER
CYP51A1	ER
CZIB	Cytoplasm
D2HGDH	Mitochondria
DAG1	PM
DAP3	Mitochondria
DAPK3	Translation
DARS2	Mitochondria
DBT	Mitochondria
DCAF10	Nucleus
DCAF11	protein-complex
DCAF13	Nucleus
DCAF16	Cytoplasm
DCAKD	ER
DCLK1	Nucleus
DCP1B	Translation
DCTD	Cytoplasm
DCTN1	protein-complex
DCTN2	protein-complex
DCTN3	protein-complex
DCTN4	protein-complex
DCTN5	protein-complex
DCTN6	protein-complex
DCUN1D3	PM
DCXR	Mitochondria
DDAH1	Cytoplasm
DDHD2	Cytoplasm
DDI2	Cytoplasm
DDRGK1	ER
DDX17	Nucleus
DDX18	Nucleus
DDX20	Translation
DDX24	Nucleus
DDX28	Mitochondria
DDX39A	Nucleus
DDX46	Nucleus
DDX5	Nucleus
DDX50	Nucleus
DDX51	Nucleus
DDX55	Translation
DDX56	Nucleus
DECR1	Mitochondria
DEGS1	ER
DEK	Nucleus
DENND10	endosome-vesicle
DENND4C	protein-complex
DENR	Cytoplasm
DERL2	ER
DESI1	Cytoplasm
DFFA	Cytoplasm
DGAT1	ER
DGAT2	ER
DGLUCY	Mitochondria
DGUOK	Mitochondria
DHCR24	ER
DHCR7	ER
DHODH	Mitochondria
DHPS	protein-complex
DHRS1	LD
DHRS11	Cytoplasm
DHRS4	Mitochondria
DHRS7B	ER
DHRSX	LD
DHTKD1	Mitochondria
DHX15	Nucleus
DHX9	Nucleus
DIABLO	Mitochondria
DICER1	Translation
DIMT1	Nucleus
DIP2C	Cytoplasm
DKC1	Nucleus
DLAT	Mitochondria
DLD	Mitochondria
DLG1	PM
DLST	Mitochondria
DMAC2	Mitochondria
DMAC2L	Mitochondria
DMGDH	Mitochondria
DNAJA1	Cytoplasm
DNAJA2	protein-complex
DNAJA3	Mitochondria
DNAJB11	ER
DNAJB12	ER
DNAJC10	ER
DNAJC11	Mitochondria
DNAJC21	Translation
DNASE2	Lysosome
DNM1L	Cytoplasm
DNM2	protein-complex
DNMBP	Cytoplasm
DNPEP	protein-complex
DOHH	Cytoplasm
DPAGT1	ER
DPM1	ER
DPM3	ER
DPP3	Cytoplasm
DPP7	Lysosome
DPP9	Cytoplasm
DPY19L1	ER
DPYSL2	Cytoplasm
DPYSL3	Cytoplasm
DRAP1	Cytoplasm
DRG2	Cytoplasm
DSE	Golgi apparatus
DTD1	Cytoplasm
DTX3L	Nucleus
DTYMK	Mitochondria
DUS2	Cytoplasm
DUT	Mitochondria
DYNC1H1	protein-complex
DYNC1I2	protein-complex
DYNC1LI2	protein-complex
DYNLL1	protein-complex
DYNLRB1	protein-complex
DYNLT3	protein-complex
DYRK1A	Cytoplasm
EARS2	Mitochondria
EBF3	Nucleus
EBP	ER
ECD	protein-complex
ECE1	endosome-vesicle
ECH1	Mitochondria
ECHDC2	Mitochondria
ECHDC3	Mitochondria
ECHS1	Mitochondria
ECI1	Mitochondria
ECI2	Mitochondria
ECPAS	protein-complex
ECSIT	Mitochondria
EDEM2	ER
EDEM3	ER
EEF1A2	Cytoplasm
EEF1B2	Cytoplasm
EEF1D	protein-complex
EEF2	Translation
EFCAB2	Cytoplasm
EFHD2	Cytoplasm
EFL1	Cytoplasm
EFNB1	PM
EFR3A	PM
EFTUD2	Nucleus
EGFR	PM
EHHADH	Peroxisome
EHMT1	Nucleus
EI24	ER
EIF2A	Translation
EIF2AK2	Translation
EIF2AK3	ER
EIF2B1	Translation
EIF2B2	Translation
EIF2B3	Translation
EIF2B4	Translation
EIF2B5	Translation
EIF2D	Translation
EIF2S1	Translation
EIF2S2	Translation
EIF2S3	Translation
EIF3A	Translation
EIF3B	Translation
EIF3C	Translation
EIF3E	Translation
EIF3F	Translation
EIF3G	Translation
EIF3H	Translation
EIF3I	Translation
EIF3K	Translation
EIF3L	Translation
EIF3M	Translation
EIF4A2	Translation
EIF4A3	Nucleus
EIF4E	Translation
EIF4EBP1	Cytoplasm
EIF4G1	Translation
EIF4H	Cytoplasm
EIF5	Cytoplasm
EIF5A	Cytoplasm
EIF5B	Translation
ELAC2	Mitochondria
ELMOD2	ER
ELOVL1	ER
ELOVL5	ER
ELP1	protein-complex
ELP2	Cytoplasm
ELP3	protein-complex
EMC1	ER
EMC10	ER
EMC2	ER
EMC3	ER
EMC4	ER
EMC7	ER
EMC8	ER
EMD	ER
EMG1	Nucleus
EMP3	PM
ENAH	Cytoplasm
ENDOD1	ER
ENO1	Cytoplasm
ENO2	Cytoplasm
ENSG00000258529;ALG9;ALG9	ER
ENSG00000260836;RPS17	Translation
ENSG00000285942;LRRC57	Cytoplasm
ENSG00000288564;MRPL2	Mitochondria
ENTPD5	ER
ENTPD6	Golgi apparatus
EOGT	ER
EPB41L1	PM
EPB41L2	PM
EPDR1	Lysosome
EPHX1	ER
EPHX2	Cytoplasm
EPS15	Cytoplasm
EPS8L2	Cytoplasm
ERAP1	ER
ERCC2	Nucleus
ERGIC2	Golgi apparatus
ERGIC3	Golgi apparatus
ERH	Nucleus
ERI1	Translation
ERLEC1	ER
ERLIN1	ER
ERLIN2	ER
ERMP1	ER
ERO1A	ER
ERP29	ER
ESYT1	ER
ETFA	Mitochondria
ETFB	Mitochondria
ETFDH	Mitochondria
ETHE1	Mitochondria
ETV6	Nucleus
EVI5	Golgi apparatus
EXD2	Mitochondria
EXOC2	endosome-vesicle
EXOC8	protein-complex
EXOSC1	Nucleus
EXOSC2	Nucleus
EXOSC4	Nucleus
EXOSC9	Nucleus
EXT2	Golgi apparatus
EXTL2	Golgi apparatus
FABP5	Cytoplasm
FADD	Cytoplasm
FADS1	ER
FADS2	PM
FADS3	ER
FAF2	ER
FAH	Cytoplasm
FAHD1	Mitochondria
FAIM	Cytoplasm
FAM110B	Cytoplasm
FAM114A1	Cytoplasm
FAM114A2	endosome-vesicle
FAM120A	PM
FAM136A	Mitochondria
FAM13A	Cytoplasm
FAM160B1	protein-complex
FAM162A	Mitochondria
FAM20B	Golgi apparatus
FAM20C	Golgi apparatus
FAM210A	Mitochondria
FAM3A	Golgi apparatus
FAM3C	Golgi apparatus
FAM98B	Nucleus
FAP	PM
FAR2	Peroxisome
FARS2	Mitochondria
FARSA	Translation
FARSB	Translation
FAS	PM
FASTK	Mitochondria
FASTKD1	Mitochondria
FASTKD2	Mitochondria
FASTKD5	Mitochondria
FAU	Translation
FBL	Nucleus
FBXW11	endosome-vesicle
FDFT1	ER
FDPS	Cytoplasm
FDX1	Mitochondria
FDX2	Mitochondria
FDXR	Mitochondria
FECH	Mitochondria
FGD3	Cytoplasm
FH	Mitochondria
FIG4	endosome-vesicle
FITM2	LD
FKBP10	ER
FKBP14	ER
FKBP15	endosome-vesicle
FKBP2	ER
FKBP4	Cytoplasm
FKBP9	ER
FKRP	Golgi apparatus
FLII	protein-complex
FLNC	Cytoplasm
FMC1	Mitochondria
FMNL3	endosome-vesicle
FNBP1L	Cytoplasm
FNBP4	Nucleus
FNTA	Cytoplasm
FOXK1	Nucleus
FOXO1	Cytoplasm
FOXRED1	Mitochondria
FSCN1	Cytoplasm
FTO	Cytoplasm
FTSJ3	Nucleus
FUCA1	Lysosome
FUCA2	Lysosome
FUNDC2	Mitochondria
FURIN	Golgi apparatus
FUT8	Golgi apparatus
FXN	Mitochondria
FYN	PM
FZD4	PM
FZD7	PM
G3BP1	PM
G6PD	Cytoplasm
GAA	Lysosome
GABARAP	endosome-vesicle
GABARAPL1	endosome-vesicle
GABARAPL2	endosome-vesicle
GADD45GIP1	Mitochondria
GALC	Lysosome
GALE	Cytoplasm
GALK1	Cytoplasm
GALK2	Cytoplasm
GALNS	Lysosome
GALNT1	Golgi apparatus
GALNT10	Golgi apparatus
GALNT11	Golgi apparatus
GALNT16	Golgi apparatus
GALNT2	Golgi apparatus
GALNT7	Golgi apparatus
GALT	Cytoplasm
GANAB	ER
GAPDH	Cytoplasm
GAR1	Nucleus
GARS1	Cytoplasm
GART	Cytoplasm
GATB	Mitochondria
GBE1	Cytoplasm
GBP2	Cytoplasm
GCA	Cytoplasm
GCAT	Mitochondria
GCC2	Golgi apparatus
GCDH	Mitochondria
GCSH	Mitochondria
GDAP1	Mitochondria
GDAP2	ER
GDE1	ER
GDI1	Cytoplasm
GDI2	Cytoplasm
GDPGP1	Cytoplasm
GEMIN2	Translation
GEMIN4	Translation
GEMIN5	Translation
GEMIN7	Translation
GFER	Mitochondria
GFM1	Mitochondria
GFM2	Mitochondria
GFPT1	protein-complex
GFRA1	Golgi apparatus
GFUS	Cytoplasm
GGCX	ER
GGH	Lysosome
GGPS1	Cytoplasm
GGT5	PM
GHDC	ER
GHITM	Mitochondria
GID4	Cytoplasm
GIT2	protein-complex
GJA1	PM
GK	Mitochondria
GLA	Lysosome
GLB1	Lysosome
GLCE	Golgi apparatus
GLE1	Nucleus
GLG1	Golgi apparatus
GLMP	Lysosome
GLO1	Cytoplasm
GLOD4	Cytoplasm
GLRX	Cytoplasm
GLRX5	Mitochondria
GLS	Mitochondria
GLT8D2	Golgi apparatus
GLUD1	Mitochondria
GLUL	Cytoplasm
GMFB	Cytoplasm
GNA11	PM
GNA13	PM
GNAI1	PM
GNAI2	PM
GNAQ	PM
GNAS	PM
GNB1	PM
GNB1L	Cytoplasm
GNB2	PM
GNPAT	Mitochondria
GNPTG	Golgi apparatus
GNS	Lysosome
GOLGA1	Golgi apparatus
GOLGA2	Golgi apparatus
GOLGA3	protein-complex
GOLGA5	Golgi apparatus
GOLGB1	Golgi apparatus
GOLIM4	Golgi apparatus
GOLM1	Golgi apparatus
GOLM2	Golgi apparatus
GORAB	Golgi apparatus
GORASP1	Golgi apparatus
GORASP2	Golgi apparatus
GOSR1	Golgi apparatus
GOSR2;GOSR2;GOSR2;GOSR2;GOSR2;ENSG00000262633;GOSR2;GOSR2;GOSR2	Golgi apparatus
GOT2	Mitochondria
GPAM	Mitochondria
GPATCH8	Nucleus
GPC1	PM
GPD2	Mitochondria
GPI	Cytoplasm
GPR108	Golgi apparatus
GPS1	protein-complex
GPT2	Mitochondria
GPX7	ER
GPX8	ER
GRHPR	Cytoplasm
GRPEL1	Mitochondria
GRSF1	Mitochondria
GSDME	Cytoplasm
GSPT1	Cytoplasm
GSR	Cytoplasm
GSTA1;GSTA2	Cytoplasm
GSTM1	Cytoplasm
GSTM2	Cytoplasm
GSTM3	Cytoplasm
GSTM4	Cytoplasm
GSTM5	Cytoplasm
GSTP1	Cytoplasm
GTF2F2	Nucleus
GTF2I	Nucleus
GTF3C1	Nucleus
GTF3C3	Nucleus
GTPBP1	Cytoplasm
GTPBP10	Mitochondria
GTPBP3	Mitochondria
GTPBP4	Nucleus
GTPBP6	Mitochondria
GUCY1B1	Cytoplasm
GUF1	Mitochondria
GUK1	Mitochondria
GUSB	Lysosome
GXYLT1	ER
H1-0	Nucleus
H1-10	Nucleus
H1-4	Nucleus
H1-5	Nucleus
H2BC12;H2BS1	Nucleus
H6PD	ER
HACD1	ER
HACD2	ER
HACD3	ER
HACL1	Peroxisome
HADH	Mitochondria
HADHA	Mitochondria
HADHB	Mitochondria
HARS1	Cytoplasm
HARS2	Mitochondria
HAUS1	Cytoplasm
HAX1	Mitochondria
HCCS	Mitochondria
HCFC1	Nucleus
HCLS1	Cytoplasm
HDAC1	Nucleus
HDAC2	Nucleus
HDAC6	Translation
HDAC7	Cytoplasm
HDDC3	Cytoplasm
HDGFL2	Nucleus
HDHD3	Mitochondria
HDHD5	Mitochondria
HERC3	Cytoplasm
HERC4	Cytoplasm
HEXA	Lysosome
HEXB	Lysosome
HFE	endosome-vesicle
HGH1	Cytoplasm
HGS	endosome-vesicle
HIBADH	Mitochondria
HIBCH	Mitochondria
HINT1	Cytoplasm
HINT2	Mitochondria
HK1	Mitochondria
HK2	Mitochondria
HLA-A	PM
HLA-B	PM
HLCS	Cytoplasm
HLTF	Nucleus
HM13	ER
HMG20A	Nucleus
HMGB3	protein-complex
HMGCL	Mitochondria
HMGCR	ER
HMGCS1	Cytoplasm
HMGN2	Nucleus
HMGN3	Nucleus
HMOX1	ER
HMOX2	ER
HNMT	Cytoplasm
HNRNPA0	Nucleus
HNRNPA1	Nucleus
HNRNPA2B1	Nucleus
HNRNPA3	Nucleus
HNRNPAB	Nucleus
HNRNPC	Nucleus
HNRNPD	Translation
HNRNPDL	Nucleus
HNRNPH3	Nucleus
HNRNPL	Nucleus
HNRNPM	Nucleus
HNRNPU	Nucleus
HNRNPUL1	Nucleus
HNRNPUL2	Nucleus
HOOK3	protein-complex
HP1BP3	Nucleus
HPF1	Cytoplasm
HPGD	Cytoplasm
HPRT1	Cytoplasm
HRAS	PM
HS2ST1	Golgi apparatus
HSCB	Mitochondria
HSD11B1	ER
HSD11B2	ER
HSD17B10	Mitochondria
HSD17B11	LD
HSD17B12	ER
HSD17B4	Peroxisome
HSD17B7	LD
HSD17B8	Mitochondria
HSD3B7	LD
HSDL1	Mitochondria
HSDL2	Mitochondria
HSP90AA1	Cytoplasm
HSP90AB1	Cytoplasm
HSP90B1	ER
HSPA12A	Cytoplasm
HSPA13	ER
HSPA1B;HSPA1A;HSPA1B	Cytoplasm
HSPA4	Cytoplasm
HSPA5	ER
HSPA9	Mitochondria
HSPB1	Cytoplasm
HSPB6	Cytoplasm
HSPBP1	Cytoplasm
HSPD1	Mitochondria
HSPE1	Mitochondria
HSPH1	Cytoplasm
HTATSF1	Nucleus
HTRA2	Mitochondria
HTT	protein-complex
HUWE1	protein-complex
HYI	Cytoplasm
IARS2	Mitochondria
IBA57	Mitochondria
IDH1	Cytoplasm
IDH2	Mitochondria
IDH3A	Mitochondria
IDH3B	Mitochondria
IDH3G	Mitochondria
IDUA	Lysosome
IFI16	Nucleus
IFI30	Lysosome
IFIT1	Cytoplasm
IFITM3	Lysosome
IFTAP	Cytoplasm
IGBP1	Cytoplasm
IGFBP5	endosome-vesicle
IGFBP7	Golgi apparatus
IGHMBP2	Translation
IGSF8	PM
IKBIP	ER
ILF2	Nucleus
ILF3	Nucleus
ILVBL	ER
IMMP1L	Mitochondria
IMMT	Mitochondria
IMP4	Nucleus
IMPDH1	protein-complex
IMPDH2	Cytoplasm
INPPL1	Cytoplasm
INSIG1	ER
INSR	endosome-vesicle
INTS3	Nucleus
INTS6	Nucleus
IPO4	Cytoplasm
IPO7	protein-complex
IQGAP1	protein-complex
IRAK1	Cytoplasm
IRF2BP2	Nucleus
IRS1	Cytoplasm
ISCA2	Mitochondria
ISCU	Mitochondria
ITCH	endosome-vesicle
ITFG1	Golgi apparatus
ITFG1	endosome-vesicle
ITFG2	endosome-vesicle
ITGA6	PM
ITGA7	PM
ITGAV	PM
ITGB1	ER
ITGB5	PM
ITPA	Cytoplasm
ITPR1	ER
ITPR2	ER
ITPRID2	PM
IVD	Mitochondria
IWS1	Nucleus
JMJD7	Cytoplasm
JPT1	Cytoplasm
JPT2	Cytoplasm
KCTD1;KCTD21;KCTD21;KCTD21;KCTD21;KCTD1;KCTD1;KCTD21;KCTD1	Cytoplasm
KDELR2	ER
KDM1A	Nucleus
KDM3B	Nucleus
KDSR	ER
KHDRBS1	Nucleus
KHDRBS3	Nucleus
KIAA0100	ER
KIAA0319L	Golgi apparatus
KIAA2013	Golgi apparatus
KIF21A	Cytoplasm
KIF5B	Cytoplasm
KLC2	Cytoplasm
KLHL22	protein-complex
KLHL25	Cytoplasm
KPNA3	Cytoplasm
KPNA6	Cytoplasm
KTN1	ER
KYAT1	Cytoplasm
L2HGDH	Mitochondria
LACTB	Mitochondria
LAIR1	PM
LAMA2	PM
LAMA4	PM
LAMB1	ER
LAMC1	ER
LAMP1	PM
LAMP2	Lysosome
LAMTOR1	PM
LAMTOR3	Lysosome
LAMTOR4	Lysosome
LAMTOR5	Lysosome
LAP3	Cytoplasm
LARP1	Translation
LARP7	Nucleus
LARS2	Mitochondria
LASP1	Cytoplasm
LBR	ER
LCLAT1	ER
LCMT1	Cytoplasm
LDAH	LD
LDHA	Cytoplasm
LDHB	Cytoplasm
LDHD	Mitochondria
LDLR	endosome-vesicle
LEMD2	ER
LEO1	Nucleus
LETM1	Mitochondria
LETMD1	Mitochondria
LGALS1	Cytoplasm
LGALS12	LD
LGALS3	Cytoplasm
LGALS8	PM
LIAS	Mitochondria
LIMS1	Cytoplasm
LIN7C	PM
LIPA	Lysosome
LIPE	Cytoplasm
LMAN2L	Golgi apparatus
LMBR1;LMBR1L;LMBR1L;LMBR1L;LMBR1L;LMBR1L;LMBR1;LMBR1	PM
LMBRD1	endosome-vesicle
LMBRD2	endosome-vesicle
LMF1	ER
LMF2	ER
LMNA	Nucleus
LMNB1	Nucleus
LMNB2	Nucleus
LMTK2	endosome-vesicle
LNPEP	endosome-vesicle
LNPK	ER
LOC102724159;PWP2	Nucleus
LONP1	Mitochondria
LPAR1	PM
LPCAT1	ER
LPCAT3	ER
LPGAT1	ER
LPIN1	protein-complex
LPIN3	LD
LPP	Cytoplasm
LRBA	Golgi apparatus
LRP1	endosome-vesicle
LRP1B	endosome-vesicle
LRPPRC	Mitochondria
LRRC14	Cytoplasm
LRRC41	Nucleus
LRRFIP1	Cytoplasm
LRSAM1	Cytoplasm
LSM14B	Translation
LSS	ER
LTA4H	Cytoplasm
LXN	Cytoplasm
LY75;LY75;CD302	Golgi apparatus
LY75;LY75;CD302	endosome-vesicle
LYAR	Nucleus
LYPLA1	Cytoplasm
LYRM4	Mitochondria
LYRM7	Mitochondria
LZTFL1	Cytoplasm
M6PR	endosome-vesicle
MACROD1	Mitochondria
MACROH2A2	Nucleus
MAGED2	protein-complex
MAGOH;MAGOHB	Nucleus
MAGT1	ER
MAIP1	Mitochondria
MALSU1	Mitochondria
MAML3	Translation
MAN1A1	Golgi apparatus
MAN1A2	Golgi apparatus
MAN1B1	Golgi apparatus
MAN2A1	Golgi apparatus
MAN2A2	Golgi apparatus
MAN2B1	Lysosome
MANBA	Lysosome
MANBAL	ER
MANEA	Golgi apparatus
MANF	ER
MAOA	Mitochondria
MAOB	Mitochondria
MAP2K1	Cytoplasm
MAP2K2	Cytoplasm
MAP2K3	Cytoplasm
MAP3K4	Cytoplasm
MAP3K5	Cytoplasm
MAP3K7	Cytoplasm
MAPK1	Cytoplasm
MAPK12	Nucleus
MAPK9	Cytoplasm
MAPRE1	Cytoplasm
MARCHF5	Mitochondria
MARS2	Mitochondria
MATR3	Nucleus
MAVS	Mitochondria
MB21D2	Cytoplasm
MBLAC2	LD
MBOAT7	ER
MBTPS1	Golgi apparatus
MCAT	Mitochondria
MCCC1	Mitochondria
MCCC2	Mitochondria
MCEE	Mitochondria
MCM2	Nucleus
MCM3AP	Nucleus
MCM7	protein-complex
MCTS1	Cytoplasm
MCU	Mitochondria
MCUB	Mitochondria
MCUR1	Mitochondria
MDFIC	Golgi apparatus
MDH1	Cytoplasm
MDH2	Mitochondria
ME2	Mitochondria
MEAK7	Cytoplasm
MECR	Mitochondria
MED1	Nucleus
MED12	Nucleus
MED23	Nucleus
MED27	Nucleus
MED4	Nucleus
MEGF9	endosome-vesicle
MESD	ER
MEST	ER
METAP1	Translation
METAP2	Cytoplasm
METTL16	Translation
METTL7A	LD
MFF	Mitochondria
MFN1	Mitochondria
MFN2	Mitochondria
MFSD1	PM
MFSD9	PM
MGARP	Mitochondria
MGAT1	Golgi apparatus
MGAT2	Golgi apparatus
MGST3	Mitochondria
MIA2	ER
MIA3	ER
MIB1	endosome-vesicle
MICALL1	Cytoplasm
MICOS13	Mitochondria
MICU1	Mitochondria
MICU2	Mitochondria
MICU3	Mitochondria
MIEF1	Mitochondria
MIEN1	Cytoplasm
MIF	Cytoplasm
MINPP1	ER
MIPEP	Mitochondria
MKLN1	Cytoplasm
MKRN2	Cytoplasm
MLEC	ER
MLH1	Nucleus
MLYCD	Mitochondria
MMAA	Mitochondria
MMAB	Mitochondria
MMGT1	ER
MMP15	PM
MMS19	protein-complex
MMUT	Mitochondria
MOCS2	Cytoplasm
MOGS	ER
MORF4L1	Nucleus
MOSPD2	ER
MOV10	Translation
MPC2	Mitochondria
MPI	Cytoplasm
MPP7	PM
MPST	Mitochondria
MPV17	Mitochondria
MPZL1	PM
MRC2	endosome-vesicle
MRE11	Nucleus
MRM2	Mitochondria
MRM3	Mitochondria
MRPL1	Mitochondria
MRPL10	Mitochondria
MRPL12	Mitochondria
MRPL13	Mitochondria
MRPL15	Mitochondria
MRPL16	Mitochondria
MRPL17	Mitochondria
MRPL18	Mitochondria
MRPL19	Mitochondria
MRPL22	Mitochondria
MRPL23	Mitochondria
MRPL24	Mitochondria
MRPL27	Mitochondria
MRPL28	Mitochondria
MRPL3	Mitochondria
MRPL30	Mitochondria
MRPL32	Mitochondria
MRPL37	Mitochondria
MRPL38	Mitochondria
MRPL39	Mitochondria
MRPL4	Mitochondria
MRPL40	Mitochondria
MRPL41	Mitochondria
MRPL42	Mitochondria
MRPL43	Mitochondria
MRPL44	Mitochondria
MRPL46	Mitochondria
MRPL47	Mitochondria
MRPL48	Mitochondria
MRPL49	Mitochondria
MRPL50	Mitochondria
MRPL51	Mitochondria
MRPL53	Mitochondria
MRPL54	Mitochondria
MRPL55	Mitochondria
MRPL58	Mitochondria
MRPL9	Mitochondria
MRPS10	Mitochondria
MRPS11	Mitochondria
MRPS12	Mitochondria
MRPS14	Mitochondria
MRPS15	Mitochondria
MRPS18A	Mitochondria
MRPS18C	Mitochondria
MRPS2	Mitochondria
MRPS21	Mitochondria
MRPS22	Mitochondria
MRPS24	Mitochondria
MRPS25	Mitochondria
MRPS26	Mitochondria
MRPS27	Mitochondria
MRPS30	Mitochondria
MRPS31	Mitochondria
MRPS33	Mitochondria
MRPS34	Mitochondria
MRPS35	Mitochondria
MRPS36	Mitochondria
MRPS5	Mitochondria
MRPS6	Mitochondria
MRPS7	Mitochondria
MRPS9	Mitochondria
MRRF	Mitochondria
MSMO1	ER
MSRA	Cytoplasm
MSRB3	ER
MSTO1	Cytoplasm
MTA2	Nucleus
MTAP	Cytoplasm
MTARC1	Mitochondria
MTARC2	Mitochondria
MTCH1	Mitochondria
MT-CO1	Mitochondria
MT-CO2	Mitochondria
MT-CO3	Mitochondria
MT-CYB	Mitochondria
MTFR1	Mitochondria
MTG1	Mitochondria
MTHFD1L	Mitochondria
MTIF2	Mitochondria
MTIF3	Mitochondria
MTMR2	endosome-vesicle
MT-ND5	Mitochondria
MTOR	protein-complex
MTPN	Cytoplasm
MTR	Cytoplasm
MTRES1	Mitochondria
MTREX	Nucleus
MTX1	Mitochondria
MTX2	Mitochondria
MTX3	Mitochondria
MUL1	Mitochondria
MVD	Cytoplasm
MVK	Cytoplasm
MYBBP1A	Nucleus
MYCBP2	Translation
MYDGF	ER
MYEF2	Nucleus
MYH10	protein-complex
MYH11	Cytoplasm
MYO1B	PM
MYO9A	protein-complex
MYO9B	Cytoplasm
MYOF	endosome-vesicle
NAA10	Cytoplasm
NAA15	Cytoplasm
NAA25	Golgi apparatus
NACA	Translation
NADK2	Mitochondria
NAGA	Lysosome
NAGK	Cytoplasm
NAGLU	Lysosome
NANP	Cytoplasm
NARS1	Cytoplasm
NARS2	Mitochondria
NBAS	ER
NBN	Nucleus
NCBP3	Nucleus
NCK1	Cytoplasm
NCLN	ER
NCOA4	Translation
NCOR2	Nucleus
NDFIP1	Golgi apparatus
NDRG1	Cytoplasm
NDST1	Golgi apparatus
NDST2	Golgi apparatus
NDUFA10	Mitochondria
NDUFA12	Mitochondria
NDUFA13	Mitochondria
NDUFA2	Mitochondria
NDUFA5	Mitochondria
NDUFA6	Mitochondria
NDUFA7	Mitochondria
NDUFA8	Mitochondria
NDUFA9	Mitochondria
NDUFAB1	Mitochondria
NDUFAF2	Mitochondria
NDUFAF3	Mitochondria
NDUFAF4	Mitochondria
NDUFAF5	Mitochondria
NDUFAF6	Mitochondria
NDUFAF7	Mitochondria
NDUFB10	Mitochondria
NDUFB11	Mitochondria
NDUFB2	Mitochondria
NDUFB3	Mitochondria
NDUFB6	Mitochondria
NDUFB7	Mitochondria
NDUFB8	Mitochondria
NDUFS1	Mitochondria
NDUFS2	Mitochondria
NDUFS4	Mitochondria
NDUFS5	Mitochondria
NDUFS6	Mitochondria
NDUFS7	Mitochondria
NDUFS8	Mitochondria
NDUFV1	Mitochondria
NDUFV2	Mitochondria
NDUFV3	Mitochondria
NEDD4	Cytoplasm
NEK1	Cytoplasm
NEK9	protein-complex
NELFA	Nucleus
NENF	ER
NEU1	Lysosome
NFAT5	Nucleus
NFIA	Nucleus
NFIB	Nucleus
NFIC	Nucleus
NFIX	Nucleus
NFKB2	protein-complex
NFU1	Mitochondria
NFXL1	ER
NGDN	Nucleus
NGRN	Mitochondria
NIBAN1	Cytoplasm
NIBAN2	Cytoplasm
NIPA2	Golgi apparatus
NIPBL	Nucleus
NIPSNAP1	Mitochondria
NIPSNAP2	Mitochondria
NIPSNAP3A	Mitochondria
NIT1	Cytoplasm
NIT2	Cytoplasm
NKIRAS1	Cytoplasm
NKTR	Cytoplasm
NLN	Mitochondria
NLRC3	Cytoplasm
NLRX1	Mitochondria
NME1	Cytoplasm
NME2;NME1-NME2	Cytoplasm
NME3	Mitochondria
NME4	Mitochondria
NME6	Mitochondria
NMI	Cytoplasm
NNT	Mitochondria
NOA1	Mitochondria
NOC3L	Nucleus
NOC4L	Nucleus
NOL3	Cytoplasm
NOLC1	Nucleus
NOMO2	ER
NONO	Nucleus
NOP10	Nucleus
NOP2	Nucleus
NOP56	Nucleus
NOTCH2	PM
NPC1	ER
NPC2	Lysosome
NPEPPS	Cytoplasm
NPLOC4	Cytoplasm
NPM1	Nucleus
NPR1	PM
NPR2	PM
NQO1	Cytoplasm
NQO2	Cytoplasm
NR3C1	Cytoplasm
NRBF2	Cytoplasm
NRBP1	Cytoplasm
NRBP2	Cytoplasm
NRM	Nucleus
NSA2	Nucleus
NSDHL	LD
NSF	Golgi apparatus
NSMCE4A	Nucleus
NSUN2	Translation
NSUN4	Mitochondria
NT5C	Cytoplasm
NT5C3A	Mitochondria
NT5DC2	Mitochondria
NT5DC3	Mitochondria
NUBP1	Cytoplasm
NUBPL	Mitochondria
NUCB1	Golgi apparatus
NUCB2	Golgi apparatus
NUDCD3	Cytoplasm
NUDT15	Nucleus
NUDT19	Mitochondria
NUDT3	Cytoplasm
NUDT4	Cytoplasm
NUDT4B;NUDT4	Cytoplasm
NUDT6	Mitochondria
NUDT8	Mitochondria
NUP107	Nucleus
NUP155	Nucleus
NUP160	Nucleus
NUP188	Nucleus
NUP50	Nucleus
NUP85	Nucleus
NUP93	Nucleus
NUP98	Nucleus
NUS1	LD
NXF1	Nucleus
OAT	Mitochondria
OBSCN	PM
OCIAD1	Mitochondria
OCIAD2	Mitochondria
ODR4	ER
OGA	Cytoplasm
OGDH	Mitochondria
OLA1	Cytoplasm
OMA1	Mitochondria
OPA1	Mitochondria
OPTN	Cytoplasm
OS9	ER
OSBPL1A	Cytoplasm
OSBPL3	LD
OSBPL8	ER
OSGEPL1	Mitochondria
OSTF1	Cytoplasm
OSTM1	Lysosome
OTUB1	Cytoplasm
OTUD6B	protein-complex
OXA1L	Mitochondria
OXCT1	Mitochondria
OXLD1	Mitochondria
OXNAD1	Mitochondria
OXSM	Mitochondria
OXSR1	Cytoplasm
P4HA1	ER
P4HA2	ER
P4HB	ER
PAAF1	protein-complex
PAF1	Nucleus
PAFAH1B1	protein-complex
PAFAH1B2	Cytoplasm
PAICS	protein-complex
PAIP1	Cytoplasm
PAM	Golgi apparatus
PANK4	Cytoplasm
PARG	protein-complex
PARK7	Cytoplasm
PARL	Mitochondria
PARP16	ER
PARS2	Mitochondria
PAWR	Cytoplasm
PBRM1	Nucleus
PBXIP1	ER
PC	Mitochondria
PCBP2	Cytoplasm
PCCA	Mitochondria
PCCB	Mitochondria
PCK2	Mitochondria
PCMT1	Cytoplasm
PCSK7	Golgi apparatus
PCSK9	ER
PCYT2	Cytoplasm
PDCD5	Cytoplasm
PDCD6	Cytoplasm
PDCL	Cytoplasm
PDCL3	protein-complex
PDE12	Mitochondria
PDE3B	ER
PDGFRB	PM
PDHA1	Mitochondria
PDHB	Mitochondria
PDHX	Mitochondria
PDIA3	ER
PDIA4	ER
PDIA5	ER
PDIA6	ER
PDK1	Mitochondria
PDK2	Mitochondria
PDK4	Mitochondria
PDP1	Mitochondria
PDS5A	Nucleus
PDS5B	Nucleus
PDSS2	Mitochondria
PDZD8	ER
PEA15	Cytoplasm
PEBP1	Cytoplasm
PECR	Mitochondria
PEDS1	ER
PELO	Translation
PELP1	Nucleus
PEX11B	Peroxisome
PEX14	Peroxisome
PEX5	Cytoplasm
PFDN1	Cytoplasm
PFDN2	Cytoplasm
PFKL	protein-complex
PFKM	protein-complex
PFKP	Cytoplasm
PFN1	Cytoplasm
PFN3	Cytoplasm
PGAM5	Mitochondria
PGAP1	ER
PGD	Cytoplasm
PGM1	Cytoplasm
PGM3	Cytoplasm
PGRMC1	ER
PGRMC2	ER
PGS1	Mitochondria
PHACTR4	Cytoplasm
PHB	Mitochondria
PHB2	Mitochondria
PHC2	Nucleus
PHF5A	Nucleus
PHF6	Translation
PHGDH	Cytoplasm
PHKA1	protein-complex
PHKA2	protein-complex
PHKB	protein-complex
PHKG2	protein-complex
PHLDB1	Cytoplasm
PHPT1	Cytoplasm
PHYH	Peroxisome
PI4K2A	endosome-vesicle
PIGK	ER
PIGO	ER
PIGQ	Golgi apparatus
PIGS	ER
PIGT	ER
PIGU	ER
PIK3C2A	PM
PIK3C3	protein-complex
PIK3CA	protein-complex
PIK3R1	Cytoplasm
PIK3R4	protein-complex
PIP4K2C	Cytoplasm
PISD	Mitochondria
PITPNA	Cytoplasm
PITPNB	Cytoplasm
PITRM1	Mitochondria
PKM	Cytoplasm
PLA2G15	Lysosome
PLA2G4A	Cytoplasm
PLBD1	Lysosome
PLBD2	Lysosome
PLCD4	Cytoplasm
PLD1	Golgi apparatus
PLD3	Lysosome
PLIN1	LD
PLIN2	LD
PLIN4	LD
PLIN4	LD
PLOD2	ER
PLOD3	ER
PLPBP	Cytoplasm
PLPP1	PM
PLRG1	Nucleus
PLS3	Cytoplasm
PLSCR1	Nucleus
PLTP	LD
PLXNA2	PM
PLXNA3	PM
PLXNB1	PM
PLXNB2	PM
PMPCA	Mitochondria
PMPCB	Mitochondria
PNKD	Mitochondria
PNP	Cytoplasm
PNPLA2	LD
PNPLA4	Mitochondria
PNPLA6	ER
PNPO	Cytoplasm
PNPT1	Mitochondria
POC1B-GALNT4;GALNT4	Golgi apparatus
POFUT1	ER
POGLUT1	ER
POGLUT3	ER
POLG	Mitochondria
POLG2	Mitochondria
POLR1A	protein-complex
POLR2B	protein-complex
POLR2H	Nucleus
POLR3A	Nucleus
POLR3E	Nucleus
POLRMT	Mitochondria
POMGNT1	Golgi apparatus
POMGNT2	ER
PON2	ER
POP1	Nucleus
POP4	Nucleus
POP7	Nucleus
POR	ER
PPA2	Mitochondria
PPCDC	Cytoplasm
PPFIA1	Cytoplasm
PPIB	ER
PPID	Cytoplasm
PPIF	Mitochondria
PPIG	Nucleus
PPIP5K1	Cytoplasm
PPL	PM
PPM1A	Cytoplasm
PPM1B	Cytoplasm
PPM1L	Golgi apparatus
PPP1R9B	PM
PPP2CB;PPP2CA	protein-complex
PPP2R1A	Cytoplasm
PPP2R1B	Cytoplasm
PPP2R2A	Cytoplasm
PPP2R2D	Cytoplasm
PPP2R5A	Cytoplasm
PPP2R5C	Cytoplasm
PPP2R5D	Cytoplasm
PPP2R5E	Cytoplasm
PPP3CA	Cytoplasm
PPP3CB	Cytoplasm
PPP3CC	Cytoplasm
PPP4R3A	Nucleus
PPP5C	Cytoplasm
PPP6R1	protein-complex
PPP6R2	Cytoplasm
PPP6R3	Cytoplasm
PPT1	Lysosome
PPT2;PPT2;PPT2;PPT2;ENSG00000254875;PPT2;PPT2;PPT2;PPT2;PPT2	Lysosome
PPTC7	Mitochondria
PRAF2	ER
PRCP	Lysosome
PRDX2	Cytoplasm
PRDX3	Mitochondria
PRDX4	ER
PRDX6	Cytoplasm
PREB	ER
PREP	Cytoplasm
PRKAA1	protein-complex
PRKAB2	protein-complex
PRKACA	Cytoplasm
PRKAG1	protein-complex
PRKAR1A	Cytoplasm
PRKCA	Cytoplasm
PRKCD	Cytoplasm
PRKCSH	ER
PRKDC	Nucleus
PRKG1	Cytoplasm
PRKRA	Translation
PRNP	PM
PRODH	Mitochondria
PRORP	Mitochondria
PRPF19	Nucleus
PRPF31	Nucleus
PRPF4	Nucleus
PRPF40A	Nucleus
PRPF4B	Nucleus
PRPF6	Nucleus
PRPF8	Nucleus
PRPS1	protein-complex
PRPSAP1	protein-complex
PRPSAP2	protein-complex
PRR5	protein-complex
PRUNE1	Cytoplasm
PRXL2B	Cytoplasm
PSAP	Lysosome
PSEN1	Golgi apparatus
PSMA1	protein-complex
PSMA2	protein-complex
PSMA3	protein-complex
PSMA4	protein-complex
PSMA5	protein-complex
PSMA6	protein-complex
PSMA7	protein-complex
PSMB1	protein-complex
PSMB2	protein-complex
PSMB3	protein-complex
PSMB4	protein-complex
PSMB5	protein-complex
PSMB6	protein-complex
PSMB7	protein-complex
PSMB8	protein-complex
PSMB9	protein-complex
PSMC1	protein-complex
PSMC2	protein-complex
PSMC4	protein-complex
PSMC5	protein-complex
PSMC6	protein-complex
PSMD1	protein-complex
PSMD10	Cytoplasm
PSMD11	protein-complex
PSMD12	protein-complex
PSMD13	protein-complex
PSMD14	protein-complex
PSMD2	protein-complex
PSMD3	protein-complex
PSMD4	protein-complex
PSMD5	protein-complex
PSMD6	protein-complex
PSMD7	protein-complex
PSMD8	protein-complex
PSMD9	Cytoplasm
PSME1	Cytoplasm
PSME4	protein-complex
PSMF1	Cytoplasm
PSMG1	protein-complex
PSPC1	Nucleus
PSPH	Cytoplasm
PTCD2	Mitochondria
PTCD3	Mitochondria
PTEN	Cytoplasm
PTGES2	Mitochondria
PTGES3	Cytoplasm
PTGES3L-AARSD1;AARSD1;AARSD1;AARSD1	Cytoplasm
PTGFRN	PM
PTPN1	ER
PTPN12	Cytoplasm
PTPN2	ER
PTPN6	protein-complex
PTPRA	PM
PTPRF	Golgi apparatus
PTPRK	PM
PTRH1	Mitochondria
PUF60	Nucleus
PUM3	Nucleus
PURB	Translation
PUS1	Mitochondria
PXMP2	Peroxisome
PYCR1	Mitochondria
PYCR2	Mitochondria
PYGB	protein-complex
PYGL	Cytoplasm
PYM1	Translation
PYROXD2	Mitochondria
QRSL1	Mitochondria
QSOX2	Golgi apparatus
RAB10	Golgi apparatus
RAB11A	endosome-vesicle
RAB11B	endosome-vesicle
RAB11FIP5	endosome-vesicle
RAB12	LD
RAB14	endosome-vesicle
RAB18	LD
RAB19	LD
RAB1B	Golgi apparatus
RAB20	endosome-vesicle
RAB21	ER
RAB2A	Golgi apparatus
RAB33B	PM
RAB43	PM
RAB4A	endosome-vesicle
RAB4B	endosome-vesicle
RAB5A	endosome-vesicle
RAB5B	endosome-vesicle
RAB6A	Golgi apparatus
RAB6B	Golgi apparatus
RAB7A	ER
RAB8B	PM
RAB9A	ER
RABEP2	Cytoplasm
RABL6	Cytoplasm
RACK1	Translation
RAD50	Nucleus
RAE1	Translation
RAF1	Cytoplasm
RALA	PM
RALB	PM
RALY	Nucleus
RANBP1	Cytoplasm
RANBP10	protein-complex
RANBP2	Nucleus
RANBP9	protein-complex
RANGAP1	Nucleus
RAP1A	PM
RAP1B	PM
[truncated: 790 more rows]
