# Supplementary material for: C-COMPASS: a user-friendly neural network tool profiles cell compartments at protein and lipid levels
Source: Nat Methods. 2025 Dec 4;23(1):118–30. doi: 10.1038/s41592-025-02880-3 (PMC12791020; doi:10.1038/s41592-025-02880-3)
Supplement: Supplementary file 18 — Comparison with Klingelhuber et al. [file 41592_2025_2880_MOESM18_ESM.xlsx]

## Sheet: 02_B
Marker	Fr01_median	Fr02_median	Fr03_median	Fr04_median	Fr05_median	Fr06_median	Fr07_median	Fr08_median	Fr09_median	Fr10_median	Fr11_median	Fr12_median	Fr13_median	Fr14_median	Fr15_median	Fr16_median	Fr17_median	Fr18_median	Fr19_median	Fr20_median	Fr21_median	Fr22_median	Fr23_median	Fr24_median
Cytosol	0.263417	0.845334	0.764708	0.513455	0.37998	0.291422	0.218336	0.164729	0.124288	0.117776	0.0705719	0.0906498	0.0493945	0.0327463	0.0303238	0.0355068	0.0246258	0.0342571	0.0394271	0.0411606	0.0529234	0.0501728	0.13629	0.166581
ER	0.410956	0.0225212	0.0108304	0.0139147	0.0302931	0.0628125	0.108571	0.165591	0.23891	0.317882	0.454116	0.460198	0.657474	0.781277	0.781609	0.832353	0.871404	0.868951	0.773347	0.673906	0.684737	0.665875	0.432399	0.304721
Golgi	0.164508	0.0505236	0.0507366	0.0536048	0.0840651	0.180968	0.202952	0.203816	0.285227	0.300194	0.387912	0.355122	0.610614	0.879338	0.652076	0.402728	0.264859	0.242321	0.18782	0.172309	0.143661	0.155094	0.11462	0.0817119
Lysosome	0.0711223	0.0352776	0.0211771	0.00762222	0.0102877	0.0170448	0.0315826	0.0519228	0.0773267	0.120091	0.198849	0.22158	0.37427	0.41229	0.46224	0.479798	0.608122	0.672779	0.838023	0.85811	0.853829	0.730098	0.517815	0.518755
Mitochondria	0.3396	0.0331453	0.0236983	0.0146717	0.0131053	0.0147602	0.0157215	0.0128919	0.0190742	0.0235539	0.0421596	0.0501932	0.078917	0.137398	0.22002	0.414804	0.781298	0.9613	0.792019	0.566795	0.424262	0.425114	0.319853	0.114909
Nucleus	0.583503	0.147442	0.113345	0.0948648	0.0801362	0.0777905	0.100224	0.11221	0.126348	0.100233	0.101965	0.0884821	0.0893863	0.100121	0.0958483	0.108511	0.106241	0.15354	0.207757	0.30412	0.39017	0.375877	0.238516	0.835833
Peroxisome	0.458203	0.0326226	0.0524799	0.0538826	0.0418248	0.0171276	0.0207001	0.0197908	0.0338614	0.0493685	0.0969857	0.133792	0.197497	0.29923	0.404891	0.513749	0.774807	0.966405	0.915416	0.792012	0.807643	0.698314	0.437722	0.265724
PM	0.504693	0.129886	0.0908627	0.060314	0.0536014	0.0796106	0.128229	0.17269	0.238277	0.319198	0.47398	0.482253	0.64183	0.748755	0.768541	0.769715	0.761473	0.719757	0.634111	0.559989	0.48742	0.484845	0.352465	0.244855
Endosome	0.284217	0.296141	0.248941	0.280321	0.313269	0.296578	0.344094	0.456282	0.584189	0.619705	0.708775	0.592851	0.589905	0.521904	0.384791	0.28783	0.214293	0.20274	0.186324	0.182249	0.169856	0.161489	0.152113	0.129699
LD	0.964835	0.0993248	0.0789329	0.0722564	0.0773206	0.072727	0.0778857	0.0811328	0.10965	0.131551	0.163686	0.203923	0.22999	0.242843	0.218761	0.229365	0.222227	0.237713	0.203459	0.171594	0.161019	0.159942	0.121346	0.092163
Protein-Complex	0.231036	0.346359	0.387024	0.716002	0.837215	0.612378	0.391149	0.285193	0.207205	0.181019	0.117562	0.105725	0.0646866	0.0528234	0.035943	0.039269	0.0241064	0.035266	0.042542	0.0458708	0.0472713	0.0518484	0.08622	0.130664
Translation	0.219217	0.0881753	0.0677475	0.05585	0.127834	0.301473	0.433213	0.752311	0.89315	0.519811	0.44737	0.343025	0.307383	0.283316	0.251493	0.242629	0.210192	0.203862	0.226654	0.265962	0.34338	0.297038	0.170688	0.367914

## Sheet: 02_C_upper
without upsampling
UMAP1	UMAP2	marker
12.6578	8.541	PROTEIN-COMPLEX
10.5402	11.9826	CYTOPLASM
-0.924364	8.96648	LYSOSOME
10.7752	10.9263	CYTOPLASM
7.07056	7.01409	ENDOSOME-VESICLE
-2.18011	13.183	MITOCHONDRIA
1.66806	2.97888	NUCLEUS
1.88958	8.835	ER
6.23342	7.46536	ENDOSOME-VESICLE
2.77663	8.46127	LYSOSOME
1.75102	3.00409	NUCLEUS
5.70304	7.32405	GOLGI APPARATUS
1.27338	8.63349	ER
7.11648	6.94406	ENDOSOME-VESICLE
1.3885	3.56707	NUCLEUS
1.74875	8.1206	ER
8.02282	6.55489	NUCLEUS
8.92305	6.46342	TRANSLATION
10.3066	10.371	CYTOPLASM
10.2306	9.16856	PROTEIN-COMPLEX
11.6437	11.7594	CYTOPLASM
-2.43484	13.2501	MITOCHONDRIA
1.64651	3.4642	NUCLEUS
-0.427451	4.67983	NUCLEUS
7.07573	6.91279	ENDOSOME-VESICLE
-1.92974	12.3777	MITOCHONDRIA
7.06268	6.85178	ENDOSOME-VESICLE
-3.17738	12.0303	MITOCHONDRIA
10.9055	10.8063	CYTOPLASM
1.46039	8.31795	ER
-2.79892	13.234	MITOCHONDRIA
11.6853	11.6035	CYTOPLASM
11.643	9.83373	PROTEIN-COMPLEX
10.7329	11.7457	CYTOPLASM
1.61916	8.8111	ER
1.98887	3.10495	NUCLEUS
8.56928	6.77969	TRANSLATION
-2.91303	12.9363	MITOCHONDRIA
8.59236	6.26602	TRANSLATION
10.2351	10.5294	PROTEIN-COMPLEX
8.85627	6.19461	NUCLEUS
-3.00831	12.5287	MITOCHONDRIA
1.42728	3.78268	NUCLEUS
11.7154	8.7782	PROTEIN-COMPLEX
2.10905	5.11867	NUCLEUS
8.33089	5.24796	NUCLEUS
12.6331	8.80743	PROTEIN-COMPLEX
10.8945	9.3495	PROTEIN-COMPLEX
3.78132	8.55314	PM
1.92984	2.84262	NUCLEUS
2.54678	6.48242	ER
4.68245	7.8426	NUCLEUS
11.9906	11.7238	CYTOPLASM
9.66761	9.66691	ENDOSOME-VESICLE
11.3002	12.1835	CYTOPLASM
1.60121	3.56795	NUCLEUS
3.72942	3.21117	NUCLEUS
2.82463	3.27749	LD
3.50916	6.93176	PROTEIN-COMPLEX
10.6192	9.72178	PROTEIN-COMPLEX
1.67345	3.02905	NUCLEUS
1.06426	9.19507	LYSOSOME
10.2908	11.34	CYTOPLASM
10.3367	10.443	CYTOPLASM
1.20999	8.50235	ER
-1.04837	8.88749	LYSOSOME
10.4077	11.1586	CYTOPLASM
-2.93478	12.7198	MITOCHONDRIA
1.83322	3.09292	NUCLEUS
10.4707	9.3239	PROTEIN-COMPLEX
12.2486	8.35832	CYTOPLASM
10.1093	9.70531	PROTEIN-COMPLEX
-2.67986	13.1848	MITOCHONDRIA
8.15238	9.89614	CYTOPLASM
1.90934	3.38446	NUCLEUS
-2.53831	13.3211	MITOCHONDRIA
10.3408	9.66586	PROTEIN-COMPLEX
11.641	12.301	CYTOPLASM
2.61862	1.35219	NUCLEUS
2.33946	7.94388	ER
4.85763	6.08858	GOLGI APPARATUS
6.87221	7.01602	GOLGI APPARATUS
7.87324	9.60428	PM
3.74081	3.00477	NUCLEUS
-1.42341	8.81592	LYSOSOME
8.36634	4.79941	TRANSLATION
9.79323	9.43749	NUCLEUS
-3.17439	12.0719	MITOCHONDRIA
-1.84793	12.3273	MITOCHONDRIA
5.84301	10.1261	NUCLEUS
-2.66031	13.2246	MITOCHONDRIA
3.02593	8.06608	PM
12.0556	11.8319	CYTOPLASM
1.62886	9.22324	ER
4.13345	9.48799	LYSOSOME
8.03728	9.5409	ENDOSOME-VESICLE
11.0074	9.6512	NUCLEUS
4.81331	6.42494	GOLGI APPARATUS
-2.53131	13.2341	MITOCHONDRIA
1.11432	8.65304	PM
12.5298	8.62648	PROTEIN-COMPLEX
-1.91389	10.6571	MITOCHONDRIA
11.4043	11.7886	CYTOPLASM
4.54918	9.30145	PM
1.50142	4.81949	NUCLEUS
0.869512	9.21937	ER
0.825764	9.03104	ER
10.3692	11.6631	LD
10.4793	11.6784	LD
10.4871	11.4287	CYTOPLASM
7.34206	4.98522	MITOCHONDRIA
10.3029	10.7682	CYTOPLASM
9.27255	7.13851	MITOCHONDRIA
2.994	7.88034	PM
3.12651	8.12193	PM
1.79741	9.098	ER
-3.21052	11.5661	MITOCHONDRIA
-2.76051	12.9935	MITOCHONDRIA
10.7639	11.5956	CYTOPLASM
-0.731391	11.0975	MITOCHONDRIA
10.6	10.5656	CYTOPLASM
5.74759	5.13567	ENDOSOME-VESICLE
-0.890375	8.83615	LYSOSOME
4.55961	9.17336	PM
2.63773	1.29802	NUCLEUS
8.34799	4.91849	NUCLEUS
12.9619	9.34527	PM
10.7913	9.42422	CYTOPLASM
2.22657	8.96902	LYSOSOME
-0.962164	8.84035	LYSOSOME
1.06683	9.06843	ER
11.1605	11.7978	CYTOPLASM
-2.8366	12.676	MITOCHONDRIA
10.0417	9.82479	CYTOPLASM
-2.40777	13.2735	MITOCHONDRIA
2.2849	7.46029	ER
4.95031	7.9424	GOLGI APPARATUS
-2.23946	13.0955	MITOCHONDRIA
8.28709	4.96578	TRANSLATION
10.8594	9.4533	PROTEIN-COMPLEX
2.75641	6.17643	PM
8.13251	9.5744	NUCLEUS
8.36294	5.05039	NUCLEUS
11.4853	12.0165	CYTOPLASM
-2.13288	8.64919	LYSOSOME
-1.15299	8.64489	LYSOSOME
-2.91788	13.0764	MITOCHONDRIA
-1.02392	5.72507	NUCLEUS
2.22003	8.09407	PM
7.9941	5.55126	MITOCHONDRIA
11.8292	11.9711	CYTOPLASM
2.47682	6.68277	PM
10.1299	10.7936	CYTOPLASM
10.55	10.2637	PROTEIN-COMPLEX
10.3456	9.465	CYTOPLASM
9.73355	11.2593	CYTOPLASM
-3.07621	12.5906	MITOCHONDRIA
8.55611	9.41434	CYTOPLASM
8.32603	4.85586	TRANSLATION
8.28727	4.93569	TRANSLATION
10.2452	9.79787	PROTEIN-COMPLEX
2.3085	9.04876	PM
10.5009	9.92124	TRANSLATION
11.9251	10.4608	CYTOPLASM
4.39757	9.187	PM
-1.09492	8.69976	LYSOSOME
-0.193959	4.69445	NUCLEUS
10.2614	9.41447	PROTEIN-COMPLEX
11.7309	10.9243	PROTEIN-COMPLEX
9.88759	9.72355	CYTOPLASM
3.02847	7.94227	PM
10.7461	10.0592	CYTOPLASM
-3.14425	10.7931	MITOCHONDRIA
1.92454	7.62026	ER
10.6698	11.5821	CYTOPLASM
-2.90767	12.4664	MITOCHONDRIA
2.64293	1.31264	NUCLEUS
-0.418249	4.57542	NUCLEUS
6.56828	7.1744	ENDOSOME-VESICLE
10.7169	11.9654	CYTOPLASM
1.40161	7.6612	ER
9.59206	10.2928	CYTOPLASM
5.4204	7.72774	ENDOSOME-VESICLE
-3.15704	12.1763	MITOCHONDRIA
3.06927	5.27807	LD
8.28591	5.37456	TRANSLATION
1.6025	7.75156	ER
8.76109	6.31121	TRANSLATION
7.92157	6.10217	TRANSLATION
2.16704	8.35956	ER
-1.29025	8.81594	LYSOSOME
0.822416	9.32337	MITOCHONDRIA
-3.05115	12.4033	MITOCHONDRIA
2.5944	3.51352	NUCLEUS
10.7431	10.2889	CYTOPLASM
6.80736	8.30601	CYTOPLASM
3.97215	3.32446	CYTOPLASM
11.3146	12.2088	CYTOPLASM
9.92215	9.32621	ENDOSOME-VESICLE
1.52645	8.52029	PM
2.74405	7.41512	PM
1.79324	9.02192	PM
10.0578	9.72595	CYTOPLASM
10.4033	9.22922	PROTEIN-COMPLEX
5.81299	8.55488	NUCLEUS
10.3118	9.29475	GOLGI APPARATUS
1.08788	9.20171	ER
8.92002	10.9823	NUCLEUS
9.1538	6.8175	TRANSLATION
1.21932	9.28942	ER
5.29224	9.72898	PM
1.6234	8.58576	ER
10.3179	9.36498	PROTEIN-COMPLEX
-0.486582	4.85434	NUCLEUS
10.6914	10.0991	MITOCHONDRIA
11.1031	9.85387	PROTEIN-COMPLEX
4.67669	6.18159	GOLGI APPARATUS
1.79644	8.53083	ER
0.269688	8.87147	ER
-2.53194	13.2882	MITOCHONDRIA
-2.42586	13.1085	MITOCHONDRIA
10.7916	10.0199	CYTOPLASM
2.28294	8.34662	ER
1.88521	8.92157	ER
8.54195	6.48589	TRANSLATION
10.6683	8.88454	PROTEIN-COMPLEX
-3.03095	12.6211	MITOCHONDRIA
10.703	11.4802	CYTOPLASM
6.40355	7.70376	GOLGI APPARATUS
10.3613	10.2697	NUCLEUS
1.62821	8.47685	ER
-2.89829	11.3254	MITOCHONDRIA
7.34686	4.9973	PM
11.2758	9.80964	PROTEIN-COMPLEX
0.255657	4.19417	NUCLEUS
4.70086	5.80279	GOLGI APPARATUS
12.176	9.06148	PROTEIN-COMPLEX
1.81038	8.92096	ER
10.2413	9.11693	ENDOSOME-VESICLE
-1.00881	7.2899	NUCLEUS
9.89341	9.62383	CYTOPLASM
-2.14264	12.894	MITOCHONDRIA
10.3409	10.2672	CYTOPLASM
11.7032	8.75397	PROTEIN-COMPLEX
11.1973	10.2942	CYTOPLASM
-2.62646	12.2201	MITOCHONDRIA
10.0161	9.85775	CYTOPLASM
6.99209	7.2798	ENDOSOME-VESICLE
10.4038	9.7817	CYTOPLASM
-2.25311	13.2689	MITOCHONDRIA
2.11006	8.94794	ER
-2.68563	13.3023	MITOCHONDRIA
3.30577	8.46679	PM
1.74277	3.04705	NUCLEUS
4.47712	9.5101	ER
8.24955	11.4832	NUCLEUS
-3.06302	12.3101	MITOCHONDRIA
2.35156	4.17037	MITOCHONDRIA
3.04092	4.81277	LD
1.88352	9.06164	ER
10.5252	9.19168	PROTEIN-COMPLEX
1.97161	7.44769	PM
3.58684	3.42093	NUCLEUS
-2.37078	13.0828	MITOCHONDRIA
12.5719	8.89852	PROTEIN-COMPLEX
10.9206	12.6738	CYTOPLASM
10.0686	10.5409	CYTOPLASM
1.50811	4.34538	NUCLEUS
11.1297	9.47026	PROTEIN-COMPLEX
4.6539	6.17704	GOLGI APPARATUS
4.11167	8.33991	ER
9.2746	10.0733	CYTOPLASM
-2.91286	11.3126	NUCLEUS
1.87245	8.82168	ER
10.4941	9.36408	CYTOPLASM
1.72897	3.97159	NUCLEUS
-2.80266	12.9679	MITOCHONDRIA
-2.71593	11.2679	LD
8.51724	6.80733	TRANSLATION
-0.587234	11.0768	MITOCHONDRIA
11.9301	12.2305	CYTOPLASM
1.74585	8.57466	ER
6.44877	8.45546	PROTEIN-COMPLEX
11.9939	10.2763	PROTEIN-COMPLEX
-3.10153	12.6339	MITOCHONDRIA
11.8122	12.2119	CYTOPLASM
10.4212	9.4074	ENDOSOME-VESICLE
6.95332	7.53275	ENDOSOME-VESICLE
9.66372	9.74492	NUCLEUS
3.65149	8.38165	PM
8.92545	10.7997	MITOCHONDRIA
1.81145	4.0904	NUCLEUS
12.1826	8.92937	PROTEIN-COMPLEX
8.98689	6.36336	NUCLEUS
-3.16887	12.2215	MITOCHONDRIA
1.27407	8.05606	ER
-1.18968	12.2352	MITOCHONDRIA
-2.89124	12.7789	MITOCHONDRIA
2.0485	7.57566	ER
10.6751	12.6374	CYTOPLASM
11.9142	12.3001	CYTOPLASM
11.7749	12.0612	CYTOPLASM
11.4257	12.0385	CYTOPLASM
3.87221	5.93879	ENDOSOME-VESICLE
11.4855	12.5332	CYTOPLASM
-2.86314	12.4771	MITOCHONDRIA
-0.342793	4.13918	NUCLEUS
2.77326	5.6096	LD
7.99389	5.48826	NUCLEUS
10.1454	9.72037	CYTOPLASM
8.20408	5.32213	TRANSLATION
-2.60184	13.2488	MITOCHONDRIA
11.7903	12.2025	CYTOPLASM
-2.92404	12.2488	MITOCHONDRIA
6.25073	10.4818	NUCLEUS
-3.27036	11.1781	MITOCHONDRIA
-0.575156	6.77607	NUCLEUS
7.97973	9.11179	ENDOSOME-VESICLE
-2.78733	13.1257	MITOCHONDRIA
-2.84638	13.0575	MITOCHONDRIA
10.1483	9.91152	PROTEIN-COMPLEX
11.3693	12.4198	CYTOPLASM
-2.87808	12.6523	MITOCHONDRIA
11.5687	12.2841	CYTOPLASM
10.4749	12.68	CYTOPLASM
5.01119	5.8161	GOLGI APPARATUS
11.814	12.3264	CYTOPLASM
1.63138	4.16461	NUCLEUS
12.0115	9.17823	PROTEIN-COMPLEX
-2.77348	13.1972	MITOCHONDRIA
10.5583	9.21673	CYTOPLASM
8.2593	5.34462	TRANSLATION
10.4911	11.1527	CYTOPLASM
3.70005	8.12272	NUCLEUS
-1.80415	12.7386	MITOCHONDRIA
10.8288	11.6961	CYTOPLASM
-2.97373	12.5194	MITOCHONDRIA
0.744646	3.75431	CYTOPLASM
5.82168	6.72811	GOLGI APPARATUS
10.4461	9.97303	CYTOPLASM
8.5881	6.47404	ENDOSOME-VESICLE
10.9552	10.4724	PROTEIN-COMPLEX
-2.41587	13.2896	MITOCHONDRIA
1.68141	3.3453	NUCLEUS
11.3182	10.2164	PROTEIN-COMPLEX
11.0021	12.5556	CYTOPLASM
-0.644184	10.4115	MITOCHONDRIA
-3.04561	12.4559	MITOCHONDRIA
9.62629	8.81287	NUCLEUS
-2.36349	13.2447	MITOCHONDRIA
11.6865	7.76725	CYTOPLASM
-0.204779	10.9825	MITOCHONDRIA
10.4325	10.2637	CYTOPLASM
1.73198	9.31069	ER
8.32657	4.98182	NUCLEUS
-0.333944	7.46687	NUCLEUS
8.34983	4.87562	TRANSLATION
4.41081	9.17384	PM
4.69339	6.03075	GOLGI APPARATUS
10.1924	9.91946	CYTOPLASM
4.97932	5.81616	PM
8.64765	6.31931	NUCLEUS
11.7205	10.7348	PROTEIN-COMPLEX
8.18481	5.33903	TRANSLATION
8.14906	5.28541	TRANSLATION
-0.610854	9.07774	LYSOSOME
-3.29422	11.3655	MITOCHONDRIA
-1.53539	9.45445	PEROXISOME
2.80586	1.7917	LD
2.46304	3.32689	MITOCHONDRIA
-2.88423	11.9296	MITOCHONDRIA
-0.864086	10.1324	LYSOSOME
8.74297	9.73409	CYTOPLASM
10.1534	8.88047	ENDOSOME-VESICLE
10.1735	8.90919	ENDOSOME-VESICLE
-0.826451	5.56306	TRANSLATION
6.85918	7.01179	GOLGI APPARATUS
-3.27025	10.925	MITOCHONDRIA
10.1771	9.95043	CYTOPLASM
0.406468	8.86851	ER
1.1287	8.74229	ER
9.40017	11.1252	CYTOPLASM
-2.31821	13.1321	MITOCHONDRIA
10.3594	11.1144	CYTOPLASM
9.95057	9.60972	CYTOPLASM
11.6618	9.62811	CYTOPLASM
11.4101	10.446	PROTEIN-COMPLEX
-1.25608	8.6734	LYSOSOME
11.6427	11.7676	CYTOPLASM
6.92753	6.91193	GOLGI APPARATUS
-2.61504	11.3977	MITOCHONDRIA
4.85055	6.29048	GOLGI APPARATUS
11.263	11.9558	PROTEIN-COMPLEX
-2.967	12.943	MITOCHONDRIA
1.77348	8.68132	ER
7.9573	5.88696	TRANSLATION
5.57571	7.73542	GOLGI APPARATUS
10.3356	9.59562	PROTEIN-COMPLEX
2.61638	7.49805	PM
-3.19252	10.815	MITOCHONDRIA
10.9009	11.7	CYTOPLASM
-3.11269	12.0987	MITOCHONDRIA
1.93723	6.85725	ER
3.33179	8.13065	PM
10.4443	9.74871	CYTOPLASM
3.47663	8.55058	TRANSLATION
2.76223	8.58171	ER
10.9069	12.7337	CYTOPLASM
1.52869	5.2684	NUCLEUS
11.1462	12.3211	NUCLEUS
-2.99609	12.4525	MITOCHONDRIA
12.6802	8.2593	PROTEIN-COMPLEX
7.79139	6.36855	TRANSLATION
6.8689	8.3449	NUCLEUS
11.1285	9.83739	CYTOPLASM
-1.13796	7.25249	NUCLEUS
-3.19958	11.2476	MITOCHONDRIA
4.6935	6.12665	GOLGI APPARATUS
-2.72927	13.1364	MITOCHONDRIA
10.6389	11.2742	CYTOPLASM
-1.4317	9.42568	MITOCHONDRIA
2.01409	6.85689	PM
9.37785	9.94287	NUCLEUS
10.3563	10.8177	PROTEIN-COMPLEX
8.33201	4.90752	TRANSLATION
8.35504	4.89521	TRANSLATION
10.5312	11.094	CYTOPLASM
11.7018	7.81895	NUCLEUS
2.60689	6.4329	ER
1.66342	3.14424	NUCLEUS
10.5787	10.0102	CYTOPLASM
-2.75235	13.0582	MITOCHONDRIA
11.7994	11.4644	PROTEIN-COMPLEX
3.08529	7.69784	PM
-2.01251	12.8702	MITOCHONDRIA
11.1616	11.6506	CYTOPLASM
0.580611	9.04955	LYSOSOME
8.77088	5.81426	TRANSLATION
10.9233	9.59789	NUCLEUS
11.3896	12.2706	CYTOPLASM
1.55943	8.50013	ER
8.34294	4.84487	TRANSLATION
-3.05499	12.439	MITOCHONDRIA
10.1669	9.71951	CYTOPLASM
-2.89852	12.8293	MITOCHONDRIA
-0.999097	12.0974	MITOCHONDRIA
8.93224	9.31284	PROTEIN-COMPLEX
7.04904	7.16959	TRANSLATION
2.91107	7.80926	PM
8.23387	9.56918	ENDOSOME-VESICLE
4.24159	9.38578	ER
6.3187	7.12248	ENDOSOME-VESICLE
10.9819	10.6254	PROTEIN-COMPLEX
-2.78213	10.3155	PEROXISOME
8.84134	6.07285	TRANSLATION
10.6515	11.4617	CYTOPLASM
10.4083	9.4086	ENDOSOME-VESICLE
10.3773	11.1608	CYTOPLASM
-2.69597	12.2993	MITOCHONDRIA
11.2603	11.973	CYTOPLASM
11.6443	12.3038	CYTOPLASM
12.4788	9.10378	PROTEIN-COMPLEX
5.40583	6.05971	GOLGI APPARATUS
1.66272	9.19594	PM
11.2092	12.2506	CYTOPLASM
-1.88036	8.39527	NUCLEUS
8.67415	6.23838	ENDOSOME-VESICLE
9.72593	10.2895	CYTOPLASM
8.31523	5.20446	TRANSLATION
-0.595777	4.71056	TRANSLATION
-2.97556	12.4733	MITOCHONDRIA
8.5942	9.11774	ENDOSOME-VESICLE
2.11822	9.13513	ER
-3.16817	11.489	MITOCHONDRIA
11.1302	11.8385	CYTOPLASM
10.439	10.1435	CYTOPLASM
9.33325	7.12784	NUCLEUS
8.26763	5.34896	TRANSLATION
8.05068	9.93866	NUCLEUS
10.4618	12.6146	CYTOPLASM
2.20887	3.90447	NUCLEUS
11.3773	12.1594	CYTOPLASM
1.9316	3.32968	NUCLEUS
0.879638	9.08464	ER
12.7015	8.63223	PROTEIN-COMPLEX
3.7492	9.20236	ER
-2.6601	11.9656	MITOCHONDRIA
1.64633	8.03063	NUCLEUS
10.4987	9.7249	CYTOPLASM
10.412	10.6248	CYTOPLASM
-2.90744	12.0676	MITOCHONDRIA
-2.92145	12.7374	MITOCHONDRIA
-0.641796	11.0199	MITOCHONDRIA
1.82344	7.26636	ER
2.01684	8.55215	ER
8.17384	5.11605	NUCLEUS
4.11648	9.25021	PM
8.24868	5.26881	TRANSLATION
5.47282	7.53431	GOLGI APPARATUS
9.00809	6.87372	NUCLEUS
-3.27291	11.4808	MITOCHONDRIA
8.30511	11.7677	CYTOPLASM
-2.25198	13.2775	MITOCHONDRIA
9.10735	8.97191	TRANSLATION
-2.38747	13.2039	MITOCHONDRIA
1.85688	7.29046	ER
11.0524	8.74239	ENDOSOME-VESICLE
11.0397	8.71793	ENDOSOME-VESICLE
-2.43064	12.7395	MITOCHONDRIA
-2.12787	13.2255	MITOCHONDRIA
10.8637	12.6893	CYTOPLASM
10.3776	9.81208	CYTOPLASM
6.99547	8.17012	ENDOSOME-VESICLE
1.96915	8.62474	MITOCHONDRIA
2.03837	6.87337	ER
8.36833	4.84881	TRANSLATION
8.38648	4.774	TRANSLATION
11.9993	11.6559	CYTOPLASM
-2.79365	13.0353	MITOCHONDRIA
-0.6659	8.99656	LYSOSOME
9.05728	10.8859	MITOCHONDRIA
2.81094	3.32105	LD
12.7107	8.78092	PROTEIN-COMPLEX
2.44417	9.07724	PM
-0.294028	4.96875	NUCLEUS
0.477933	8.88159	ER
5.46998	6.66232	GOLGI APPARATUS
5.44928	6.73139	GOLGI APPARATUS
5.70438	7.37863	ENDOSOME-VESICLE
8.67223	7.40808	TRANSLATION
1.65662	8.90178	ER
4.8712	6.27599	GOLGI APPARATUS
3.05756	8.79559	ER
12.9515	8.20969	CYTOPLASM
9.05787	10.8906	CYTOPLASM
8.28085	4.93852	TRANSLATION
8.34109	4.77447	TRANSLATION
-1.27888	8.8207	LYSOSOME
-3.1644	12.0269	MITOCHONDRIA
10.3489	10.3678	CYTOPLASM
1.92535	9.12602	ER
10.7168	11.3344	CYTOPLASM
11.6431	10.0906	CYTOPLASM
12.4419	8.44934	PROTEIN-COMPLEX
-1.74498	10.6187	MITOCHONDRIA
4.70616	8.14733	ENDOSOME-VESICLE
10.1493	10.1684	ENDOSOME-VESICLE
1.90998	9.12084	ER
-3.37308	11.2013	MITOCHONDRIA
7.13359	6.98924	ENDOSOME-VESICLE
7.06953	6.98333	ENDOSOME-VESICLE
11.3763	12.2713	CYTOPLASM
9.94746	9.17677	ENDOSOME-VESICLE
11.6194	12.3765	CYTOPLASM
-0.269156	9.22159	ER
5.28634	9.75375	GOLGI APPARATUS
1.23838	8.61747	ER
4.86426	6.07384	GOLGI APPARATUS
8.37267	5.49005	NUCLEUS
-2.52654	13.1418	MITOCHONDRIA
-2.17628	13.293	MITOCHONDRIA
10.4939	10.0727	CYTOPLASM
1.65463	9.34252	LYSOSOME
6.97443	6.95369	GOLGI APPARATUS
1.2189	8.52802	ER
8.72521	6.30349	TRANSLATION
11.0093	10.0374	PROTEIN-COMPLEX
-2.69823	13.2124	MITOCHONDRIA
5.05648	7.83722	PM
11.6591	11.7452	GOLGI APPARATUS
13.1636	8.17138	PROTEIN-COMPLEX
11.1632	12.5925	CYTOPLASM
12.3572	9.23828	PROTEIN-COMPLEX
9.78451	5.55091	MITOCHONDRIA
1.89556	8.82719	ER
-2.97326	12.7205	MITOCHONDRIA
2.48366	6.37775	LD
10.7097	11.3971	CYTOPLASM
0.993822	9.06754	ER
3.64586	9.31693	ER
10.4969	9.60693	PROTEIN-COMPLEX
10.4518	9.47854	CYTOPLASM
-3.20368	12.1547	MITOCHONDRIA
1.752	7.95587	ER
8.05924	5.29747	TRANSLATION
10.6335	12.8279	CYTOPLASM
9.64018	8.71448	NUCLEUS
3.57351	3.02945	NUCLEUS
1.93951	4.04228	NUCLEUS
-2.77241	13.1444	MITOCHONDRIA
2.32543	4.44705	NUCLEUS
8.47861	7.33455	ENDOSOME-VESICLE
9.51378	8.55122	NUCLEUS
-3.17942	11.9848	MITOCHONDRIA
-0.191615	8.27785	LYSOSOME
10.4964	10.6505	CYTOPLASM
7.11294	6.93958	ENDOSOME-VESICLE
11.5133	11.6465	CYTOPLASM
-3.28313	11.0491	MITOCHONDRIA
10.3386	9.86435	CYTOPLASM
-3.13839	12.0719	MITOCHONDRIA
-3.15002	11.1263	MITOCHONDRIA
8.37179	4.78649	TRANSLATION
8.0665	5.27918	TRANSLATION
1.04179	9.12151	ER
10.9267	11.7246	CYTOPLASM
12.1717	8.64293	CYTOPLASM
-1.50102	13.2604	CYTOPLASM
10.6216	11.4419	CYTOPLASM
8.36297	4.81519	TRANSLATION
8.05719	6.90637	TRANSLATION
2.2588	7.50489	ER
-2.94247	11.9981	MITOCHONDRIA
2.32633	7.51509	ER
-3.2789	10.9065	MITOCHONDRIA
-2.74556	13.0902	MITOCHONDRIA
2.8412	7.66282	PM
8.29902	4.93355	TRANSLATION
1.31982	4.89079	CYTOPLASM
10.0439	9.77953	CYTOPLASM
7.1184	6.97381	ENDOSOME-VESICLE
8.35732	5.19712	TRANSLATION
12.6425	8.30936	GOLGI APPARATUS
-2.43672	12.3755	MITOCHONDRIA
1.23203	8.61271	ER
-1.0296	8.95036	LYSOSOME
-1.94103	10.2806	PEROXISOME
-3.09808	12.362	MITOCHONDRIA
6.00381	8.55581	NUCLEUS
10.5436	9.90476	CYTOPLASM
4.61388	9.3715	PM
-2.93668	12.9811	MITOCHONDRIA
11.1894	12.2373	CYTOPLASM
10.1357	8.90485	CYTOPLASM
2.73955	7.32521	PM
10.1903	9.10108	PROTEIN-COMPLEX
7.84379	9.59455	PM
-3.33652	11.5089	MITOCHONDRIA
12.717	8.30482	PROTEIN-COMPLEX
13.1043	8.26299	PROTEIN-COMPLEX
1.84764	9.20373	ER
11.4847	12.3502	CYTOPLASM
11.2133	11.961	CYTOPLASM
8.55062	6.82644	TRANSLATION
-2.78427	13.029	MITOCHONDRIA
11.8421	10.2888	PROTEIN-COMPLEX
3.07598	8.31328	ER
10.1018	10.5562	CYTOPLASM
-3.30288	10.9438	MITOCHONDRIA
10.1654	10.8905	CYTOPLASM
4.06462	8.93289	PM
4.57825	6.23064	GOLGI APPARATUS
1.64858	7.43944	ER
12.96	8.0649	PROTEIN-COMPLEX
11.6711	12.3646	CYTOPLASM
9.69832	10.2726	CYTOPLASM
1.7578	3.49103	NUCLEUS
0.97251	9.15004	ER
-1.28313	8.67829	LYSOSOME
12.6059	8.96677	PROTEIN-COMPLEX
2.13388	9.02192	ER
1.89797	7.67397	PM
-1.20602	9.50965	PM
12.198	9.54017	PROTEIN-COMPLEX
11.2339	12.5941	CYTOPLASM
-2.88167	12.4151	MITOCHONDRIA
10.5652	11.4527	CYTOPLASM
10.1563	9.10781	PROTEIN-COMPLEX
1.59176	3.22742	NUCLEUS
4.50872	9.45315	LD
2.47275	6.57827	LD
7.09824	6.94487	ENDOSOME-VESICLE
2.35369	8.47971	ER
1.70957	8.0934	ER
-0.542734	10.7659	PEROXISOME
11.5691	11.1734	CYTOPLASM
-1.50162	7.36163	NUCLEUS
-0.368617	8.97454	NUCLEUS
12.5406	9.01801	PROTEIN-COMPLEX
12.299	8.74443	PROTEIN-COMPLEX
7.18727	6.9315	ENDOSOME-VESICLE
-1.97419	10.1777	PEROXISOME
3.11739	8.52424	MITOCHONDRIA
-2.89283	12.7503	MITOCHONDRIA
-2.90323	12.1304	MITOCHONDRIA
10.3272	11.5833	CYTOPLASM
8.10958	9.4499	ENDOSOME-VESICLE
1.89466	8.8003	ER
3.6678	2.96252	NUCLEUS
10.8976	10.2102	PROTEIN-COMPLEX
2.51268	6.60504	PM
1.50587	3.62447	NUCLEUS
10.7857	9.51883	NUCLEUS
12.3754	8.94297	PROTEIN-COMPLEX
5.90706	10.4594	MITOCHONDRIA
1.0837	9.19792	ER
1.92438	8.86772	ER
2.54368	9.57707	ER
7.03506	6.82157	ENDOSOME-VESICLE
10.1197	9.0381	ENDOSOME-VESICLE
1.93471	8.80512	ER
1.63504	3.31125	NUCLEUS
-2.30764	10.8441	MITOCHONDRIA
8.04531	6.15961	NUCLEUS
2.35464	4.16551	MITOCHONDRIA
-2.12387	10.2662	PEROXISOME
5.46145	7.5127	GOLGI APPARATUS
2.81035	7.49696	ER
2.26647	7.73977	ER
10.3905	9.4587	CYTOPLASM
5.38985	7.88202	ENDOSOME-VESICLE
-2.36129	10.2628	ER
9.84881	9.76684	CYTOPLASM
11.9595	11.7619	CYTOPLASM
9.80669	9.46593	NUCLEUS
3.84711	9.03169	PM
8.86237	6.24834	NUCLEUS
1.51085	7.94249	LD
1.66448	5.65423	NUCLEUS
-2.94512	12.3666	MITOCHONDRIA
12.3763	8.53648	PROTEIN-COMPLEX
13.0898	8.2563	PROTEIN-COMPLEX
0.469886	8.72883	NUCLEUS
1.71937	8.12072	ER
1.34329	4.00642	NUCLEUS
2.23374	5.22389	TRANSLATION
10.0796	9.76047	CYTOPLASM
2.78604	7.41328	PM
8.65398	9.83642	CYTOPLASM
10.1086	9.76779	CYTOPLASM
8.55273	11.7628	CYTOPLASM
12.6894	8.50909	PROTEIN-COMPLEX
0.987142	8.65854	ER
-3.139	12.0247	MITOCHONDRIA
2.87818	5.22124	PM
6.01427	8.55577	CYTOPLASM
0.482129	8.69801	LYSOSOME
10.646	9.47963	CYTOPLASM
-3.27094	11.8226	MITOCHONDRIA
10.2174	10.429	CYTOPLASM
-1.10379	7.2711	NUCLEUS
3.33453	8.9708	MITOCHONDRIA
-3.19467	11.1848	MITOCHONDRIA
9.88316	9.52146	NUCLEUS
11.5878	10.1454	PROTEIN-COMPLEX
10.2706	8.97177	ENDOSOME-VESICLE
6.94536	6.94958	ENDOSOME-VESICLE
-3.05758	12.3772	MITOCHONDRIA
11.1477	10.4436	CYTOPLASM
2.83214	5.24819	PM
4.35665	9.29381	PM
5.92443	10.4566	MITOCHONDRIA
9.21094	6.29773	NUCLEUS
-3.20369	11.8713	MITOCHONDRIA
-3.07547	12.47	MITOCHONDRIA
5.81602	7.31221	ENDOSOME-VESICLE
11.4969	8.61776	CYTOPLASM
-3.06458	12.6509	MITOCHONDRIA
2.75115	1.59882	LD
12.4296	9.23335	PROTEIN-COMPLEX
1.06504	3.87019	NUCLEUS
10.1672	9.93382	CYTOPLASM
2.64146	1.30518	NUCLEUS
1.46359	3.92369	NUCLEUS
-2.77862	13.1164	MITOCHONDRIA
1.42522	3.75105	NUCLEUS
0.340661	3.77784	NUCLEUS
10.4463	9.54145	CYTOPLASM
1.68691	9.01258	ER
7.52405	9.63715	PM
10.0546	8.77002	CYTOPLASM
10.3265	9.09837	GOLGI APPARATUS
6.71241	7.57878	GOLGI APPARATUS
6.66803	7.56424	ENDOSOME-VESICLE
4.78913	6.05762	GOLGI APPARATUS
2.94665	4.86317	LD
10.5053	10.9836	ENDOSOME-VESICLE
10.2786	9.65414	CYTOPLASM
6.11458	5.78563	GOLGI APPARATUS
-1.60861	9.93056	ER
3.20588	7.93632	PM
11.1928	12.4894	CYTOPLASM
9.46068	9.22622	ENDOSOME-VESICLE
-1.47013	11.4688	MITOCHONDRIA
1.56813	3.68538	NUCLEUS
11.1625	11.1426	PROTEIN-COMPLEX
11.8733	12.2874	CYTOPLASM
1.64234	3.29048	NUCLEUS
2.59356	6.34934	PM
2.66971	2.41364	GOLGI APPARATUS
2.53276	9.46442	PM
2.80459	8.583	PM
5.27398	7.86346	ENDOSOME-VESICLE
10.1743	9.58757	CYTOPLASM
10.3733	10.5194	CYTOPLASM
10.276	11.949	CYTOPLASM
11.6996	12.3528	CYTOPLASM
11.5475	10.3508	CYTOPLASM
-2.76119	13.1717	MITOCHONDRIA
-3.22745	11.8788	MITOCHONDRIA
-3.05315	12.0474	MITOCHONDRIA
10.3134	10.7684	CYTOPLASM
4.70478	6.47677	GOLGI APPARATUS
0.988977	8.89087	ER
10.8396	12.6242	CYTOPLASM
6.61844	7.02943	GOLGI APPARATUS
6.56909	7.02406	ENDOSOME-VESICLE
-2.74824	13.1647	MITOCHONDRIA
-1.65528	10.0377	PEROXISOME
3.43185	3.16162	NUCLEUS
-2.99238	12.834	MITOCHONDRIA
-2.73231	13.0501	MITOCHONDRIA
-1.39586	8.32668	ER
0.736251	5.46589	NUCLEUS
-1.44069	13.1998	NUCLEUS
1.35853	4.37074	NUCLEUS
10.5324	9.87476	CYTOPLASM
2.70605	6.98649	PM
8.27632	5.03241	TRANSLATION
-2.47506	13.2949	MITOCHONDRIA
1.72777	4.11209	NUCLEUS
12.0217	11.7056	CYTOPLASM
9.64452	9.50422	NUCLEUS
-1.34858	9.8054	ER
-2.08505	11.5416	MITOCHONDRIA
10.4036	9.41569	CYTOPLASM
8.6103	6.84481	TRANSLATION
11.2206	12.3014	CYTOPLASM
11.2402	11.4488	CYTOPLASM
6.01951	10.465	ER
11.6289	12.2877	CYTOPLASM
-3.08929	12.324	MITOCHONDRIA
0.974355	8.89487	PM
8.21912	9.69764	ENDOSOME-VESICLE
11.7864	9.99673	CYTOPLASM
0.855987	8.59933	ER
0.292891	3.74264	NUCLEUS
1.87828	8.67333	ER
8.14088	10.0708	NUCLEUS
12.1997	9.66597	PROTEIN-COMPLEX
-2.92231	12.8206	MITOCHONDRIA
10.0923	9.57845	CYTOPLASM
9.38491	7.16914	MITOCHONDRIA
1.86904	8.70285	ER
11.3868	12.3711	CYTOPLASM
4.675	6.17822	GOLGI APPARATUS
3.64119	5.52655	NUCLEUS
-2.91396	12.7985	MITOCHONDRIA
10.4064	11.2345	CYTOPLASM
2.99002	9.71368	ER
2.10964	7.42522	ER
-1.27478	7.25359	NUCLEUS
11.4516	12.3606	CYTOPLASM
1.26206	8.59217	ER
1.37758	3.93677	NUCLEUS
-0.0181465	5.5844	NUCLEUS
3.03679	8.55292	ER
-3.02821	11.528	MITOCHONDRIA
10.0859	9.07541	ENDOSOME-VESICLE
11.8922	12.024	CYTOPLASM
10.2965	10.5089	CYTOPLASM
1.57237	3.8555	NUCLEUS
-3.25707	11.5892	MITOCHONDRIA
4.44666	6.14719	GOLGI APPARATUS
-2.86439	12.8512	MITOCHONDRIA
-3.32391	11.3425	MITOCHONDRIA
2.33603	9.05861	ER
-2.51364	13.3364	MITOCHONDRIA
0.941663	9.11739	ER
7.46426	8.0166	ENDOSOME-VESICLE
1.79199	9.22042	ER
3.0285	8.09504	PM
0.5497	8.99125	ER
10.5024	9.31036	CYTOPLASM
-3.31702	11.3765	MITOCHONDRIA
10.4937	9.57005	PROTEIN-COMPLEX
10.2341	10.4907	CYTOPLASM
10.338	10.293	CYTOPLASM
11.3073	9.36673	PROTEIN-COMPLEX
1.68691	3.00177	NUCLEUS
1.69905	8.16089	ER
10.2084	9.19961	ENDOSOME-VESICLE
5.93966	5.53957	ENDOSOME-VESICLE
-2.9523	12.4874	MITOCHONDRIA
-3.17303	10.9503	MITOCHONDRIA
2.17531	7.54682	ER
-0.633319	4.83603	NUCLEUS
4.36911	9.2911	CYTOPLASM
1.42921	3.3093	NUCLEUS
10.4119	10.9711	CYTOPLASM
11.3151	11.9252	CYTOPLASM
2.78421	3.6597	LD
10.3223	9.81952	CYTOPLASM
11.8108	12.2645	CYTOPLASM
-3.05051	11.7004	MITOCHONDRIA
1.72922	9.12312	PM
0.902463	9.10638	ER
-3.08432	12.0492	MITOCHONDRIA
10.2394	5.70145	PROTEIN-COMPLEX
8.58292	5.70792	PM
11.1305	11.9311	CYTOPLASM
-2.95046	12.8929	MITOCHONDRIA
1.74504	8.4894	ER
10.6646	11.1493	CYTOPLASM
-3.10969	11.9288	MITOCHONDRIA
-2.68446	10.1749	PEROXISOME
11.7711	9.64628	NUCLEUS
-2.79875	12.6144	MITOCHONDRIA
1.6917	9.30156	ER
10.4799	10.0714	CYTOPLASM
10.8861	9.84492	CYTOPLASM
-2.71572	13.2817	MITOCHONDRIA
1.51819	7.89078	ER
9.31955	11.3425	CYTOPLASM
-3.14174	12.2183	MITOCHONDRIA
-3.04316	12.7229	MITOCHONDRIA
-3.25138	11.7217	MITOCHONDRIA
11.322	12.2113	CYTOPLASM
10.5702	10.0718	CYTOPLASM
12.0087	11.9874	CYTOPLASM
-2.68629	13.1485	MITOCHONDRIA
2.94054	7.65366	PM
11.1378	12.016	CYTOPLASM
10.8593	9.88206	CYTOPLASM
1.62462	7.48232	PM
2.22833	7.40055	PM
3.61652	8.59672	PM
11.9134	11.9479	CYTOPLASM
-0.882661	7.20269	NUCLEUS
6.95461	7.03483	ENDOSOME-VESICLE
-3.23512	11.7939	MITOCHONDRIA
1.78537	8.93218	ER
8.58142	10.4792	PEROXISOME
10.1583	9.68339	CYTOPLASM
-1.32321	7.69166	LYSOSOME
11.0246	11.7624	CYTOPLASM
10.3716	12.642	CYTOPLASM
11.1866	12.0781	CYTOPLASM
-2.64318	12.9286	MITOCHONDRIA
-3.16296	12.1491	MITOCHONDRIA
10.44	10.4777	CYTOPLASM
11.0165	11.99	CYTOPLASM
10.8976	9.8569	CYTOPLASM
11.6653	12.3459	CYTOPLASM
1.31619	8.58512	ER
1.24815	8.62601	ER
3.71445	8.9287	PM
2.32372	7.28169	PM
3.09757	8.31808	GOLGI APPARATUS
-2.97652	12.8178	MITOCHONDRIA
-1.9305	12.9569	MITOCHONDRIA
-2.87751	12.6747	MITOCHONDRIA
-2.69853	13.1816	MITOCHONDRIA
2.24891	7.45808	PM
7.88702	6.07313	TRANSLATION
8.90395	6.36381	NUCLEUS
8.47466	4.7357	TRANSLATION
8.48782	4.74881	TRANSLATION
8.27303	4.9374	TRANSLATION
2.36582	8.00141	ER
4.41244	9.33119	PM
2.79926	5.94888	ENDOSOME-VESICLE
3.94018	8.85432	PM
-3.15964	12.0754	MITOCHONDRIA
11.9248	12.1781	CYTOPLASM
8.5393	7.94417	TRANSLATION
10.9012	12.7164	CYTOPLASM
10.9543	9.79471	CYTOPLASM
-0.902934	7.25008	NUCLEUS
11.9842	11.6936	PM
2.15708	9.08215	ER
0.969554	8.69518	ER
0.182084	4.63068	NUCLEUS
10.5729	9.75137	CYTOPLASM
3.52003	8.45783	LYSOSOME
1.3009	9.22138	LYSOSOME
-1.32144	8.67664	LYSOSOME
-0.697622	8.98697	LYSOSOME
10.2693	10.5512	CYTOPLASM
10.5508	10.9544	CYTOPLASM
-1.03883	8.82841	LYSOSOME
10.7101	9.96003	CYTOPLASM
10.9723	12.4587	CYTOPLASM
-2.56155	13.2995	MITOCHONDRIA
-2.6925	13.1236	MITOCHONDRIA
10.4895	10.0195	CYTOPLASM
-1.41094	8.82724	LYSOSOME
12.4847	9.25669	PROTEIN-COMPLEX
10.58	9.65338	CYTOPLASM
10.1268	9.7104	CYTOPLASM
11.918	11.2476	CYTOPLASM
-2.74143	13.2914	MITOCHONDRIA
-2.43574	13.0617	MITOCHONDRIA
9.9196	10.5712	NUCLEUS
10.5286	11.7846	CYTOPLASM
-1.76906	10.1893	PEROXISOME
11.3376	12.3841	CYTOPLASM
11.4223	12.1734	CYTOPLASM
3.21973	8.30169	PM
11.2721	12.0968	CYTOPLASM
10.3454	10.3683	CYTOPLASM
2.21037	9.26117	ER
1.38627	8.64228	PM
7.81636	9.53885	NUCLEUS
2.04379	3.88545	NUCLEUS
10.1118	9.66759	CYTOPLASM
11.604	12.1257	CYTOPLASM
5.47913	7.5854	GOLGI APPARATUS
10.4152	9.9446	CYTOPLASM
5.14421	5.38921	GOLGI APPARATUS
1.67177	9.12518	ER
10.8211	12.6582	CYTOPLASM
-2.71802	13.2642	MITOCHONDRIA
-1.10582	8.82987	LYSOSOME
4.05334	8.88671	PM
1.53489	3.66823	NUCLEUS
1.37797	9.39452	MITOCHONDRIA
-3.06868	12.5175	MITOCHONDRIA
4.50883	8.29724	GOLGI APPARATUS
10.5385	12.6232	CYTOPLASM
-3.23815	10.8828	MITOCHONDRIA
-1.32018	8.71016	LYSOSOME
11.6579	12.0195	CYTOPLASM
-2.79239	13.1131	MITOCHONDRIA
1.02421	8.86559	ER
4.16643	9.267	ER
-2.55811	13.3505	MITOCHONDRIA
-2.72137	13.0806	MITOCHONDRIA
10.8422	9.57696	PROTEIN-COMPLEX
2.75657	7.31066	PM
3.14718	7.65937	PM
9.41061	10.0674	CYTOPLASM
1.70725	9.17896	PM
10.6521	9.69193	CYTOPLASM
12.0496	11.8876	CYTOPLASM
-2.73597	13.1851	MITOCHONDRIA
9.93835	9.95721	CYTOPLASM
-3.30748	11.0608	MITOCHONDRIA
1.29913	7.84068	PM
1.02213	8.07303	PM
-0.828361	7.33966	PM
-2.55767	11.437	MITOCHONDRIA
11.8401	11.0637	CYTOPLASM
1.59243	4.31697	PROTEIN-COMPLEX
11.8927	12.1912	CYTOPLASM
-2.59646	13.2413	MITOCHONDRIA
-2.95795	12.8258	MITOCHONDRIA
8.3976	6.28664	TRANSLATION
8.34835	6.28357	TRANSLATION
-2.86062	12.8578	MITOCHONDRIA
-2.91909	12.5122	MITOCHONDRIA
5.95025	10.4644	MITOCHONDRIA
-1.00585	8.95323	LYSOSOME
-0.347864	8.78185	LYSOSOME
10.4008	10.7401	CYTOPLASM
8.01039	6.18036	TRANSLATION
0.969954	9.00826	ER
-0.51165	9.11139	ER
-0.0259045	9.12083	ER
11.5158	10.6832	PROTEIN-COMPLEX
-2.83569	13.1621	MITOCHONDRIA
0.88056	8.55075	NUCLEUS
10.5561	11.4303	CYTOPLASM
10.4732	10.0756	CYTOPLASM
3.31825	8.11132	PM
10.5019	11.0983	CYTOPLASM
10.682	9.78944	CYTOPLASM
1.33725	7.93911	ER
7.15944	6.8881	ENDOSOME-VESICLE
1.45427	5.24562	NUCLEUS
-3.18282	12.147	MITOCHONDRIA
10.3764	10.3498	CYTOPLASM
1.50388	8.54869	PM
10.3056	10.3138	CYTOPLASM
4.52045	6.21367	GOLGI APPARATUS
11.6135	12.4047	CYTOPLASM
10.3708	9.96334	CYTOPLASM
-1.03891	8.84546	LYSOSOME
-1.16629	8.66449	LYSOSOME
8.21811	5.0698	TRANSLATION
2.57348	7.75706	PM
2.5077	6.4905	PM
11.2182	11.9345	CYTOPLASM
-2.64616	13.1126	MITOCHONDRIA
-1.518	8.84918	LYSOSOME
10.1316	11.3908	CYTOPLASM
10.4377	11.1311	CYTOPLASM
1.20397	3.90727	NUCLEUS
1.9243	8.86645	ER
2.26362	8.08067	ER
3.43933	8.43212	GOLGI APPARATUS
10.6635	12.6668	CYTOPLASM
11.0959	12.5499	CYTOPLASM
-1.1989	8.79991	LYSOSOME
-3.02665	12.1489	MITOCHONDRIA
10.415	10.9261	CYTOPLASM
2.90099	8.41948	PM
-2.5198	13.2376	MITOCHONDRIA
-3.35826	11.2226	MITOCHONDRIA
10.5856	9.77255	CYTOPLASM
10.4024	9.61152	CYTOPLASM
2.83909	5.02571	NUCLEUS
1.38378	8.0223	ER
10.0195	9.74977	CYTOPLASM
1.08254	5.57986	NUCLEUS
12.476	9.18499	PROTEIN-COMPLEX
11.3046	12.4198	CYTOPLASM
12.7362	8.88213	PROTEIN-COMPLEX
1.8022	9.0615	ER
5.45387	7.38674	NUCLEUS
8.15044	5.31705	TRANSLATION
3.29197	9.6965	PM
8.24224	5.02999	TRANSLATION
2.42872	7.74009	PM
-1.59735	8.80106	NUCLEUS
2.39946	4.0757	MITOCHONDRIA
6.9564	6.89018	GOLGI APPARATUS
5.7782	6.71024	GOLGI APPARATUS
-0.826319	11.209	MITOCHONDRIA
3.26328	8.70559	GOLGI APPARATUS
8.22756	5.02639	TRANSLATION
12.0077	11.6831	CYTOPLASM
2.88211	8.40382	PM
7.98438	6.09885	TRANSLATION
7.76311	6.33463	TRANSLATION
7.17336	7.44182	ENDOSOME-VESICLE
3.80101	8.6937	ENDOSOME-VESICLE
5.14374	5.94322	GOLGI APPARATUS
3.74715	8.33911	GOLGI APPARATUS
1.88925	8.90346	PM
12.3741	8.8194	PROTEIN-COMPLEX
7.11752	7.12361	ENDOSOME-VESICLE
-2.91437	12.8182	MITOCHONDRIA
1.53942	3.88197	NUCLEUS
11.5096	11.6817	CYTOPLASM
11.4615	12.1237	CYTOPLASM
11.8261	10.8961	PROTEIN-COMPLEX
-1.56609	8.76889	LYSOSOME
10.4606	11.0125	CYTOPLASM
10.112	9.44953	ENDOSOME-VESICLE
-2.70247	13.2478	MITOCHONDRIA
10.1233	9.71254	CYTOPLASM
-2.89322	11.4714	MITOCHONDRIA
-2.80199	13.1639	MITOCHONDRIA
-3.17063	12.2913	MITOCHONDRIA
2.76376	5.57696	ER
10.006	9.75319	CYTOPLASM
-2.79733	13.118	MITOCHONDRIA
1.77703	3.45467	NUCLEUS
8.30164	4.90072	TRANSLATION
10.1646	9.61739	CYTOPLASM
11.8125	9.87876	PROTEIN-COMPLEX
2.15788	7.77196	PM
11.0674	11.9728	CYTOPLASM
-2.72413	13.2224	MITOCHONDRIA
-2.75009	13.2134	MITOCHONDRIA
8.19127	9.60109	NUCLEUS
11.2217	12.4967	CYTOPLASM
-2.71256	13.1462	MITOCHONDRIA
-2.64509	12.9856	MITOCHONDRIA
1.04413	8.88068	ER
2.85253	7.71236	PM
-0.501211	7.01503	NUCLEUS
0.985875	8.71307	ER
11.8879	12.2553	CYTOPLASM
-3.12558	12.0856	MITOCHONDRIA
10.0907	10.5503	CYTOPLASM
8.33932	4.8492	TRANSLATION
8.33756	4.89375	TRANSLATION
-0.668041	10.4454	MITOCHONDRIA
10.8873	9.9437	CYTOPLASM
2.61943	7.14824	PM
-2.64674	13.292	MITOCHONDRIA
-0.493798	10.9302	MITOCHONDRIA
9.40828	9.49603	PROTEIN-COMPLEX
1.94558	7.7005	PM
11.9211	11.6557	CYTOPLASM
3.60468	6.17998	ENDOSOME-VESICLE
-3.13096	12.3774	MITOCHONDRIA
2.27044	9.20777	PM
8.96741	10.8788	MITOCHONDRIA
8.38923	4.76515	TRANSLATION
2.75131	7.11038	PM
-2.96376	12.574	MITOCHONDRIA
-1.83291	13.0408	MITOCHONDRIA
12.5546	8.9277	PROTEIN-COMPLEX
12.6602	8.84881	PROTEIN-COMPLEX
12.7752	8.17564	PROTEIN-COMPLEX
2.15462	7.78749	PM
8.25035	4.9736	TRANSLATION
4.40697	6.13279	GOLGI APPARATUS
10.6726	10.8592	CYTOPLASM
12.5258	9.1848	CYTOPLASM
1.39283	8.48356	ER
-3.3096	10.8715	MITOCHONDRIA
-3.01532	12.3651	MITOCHONDRIA
11.6726	12.0602	CYTOPLASM
2.68633	7.41657	ENDOSOME-VESICLE
8.09639	5.36133	TRANSLATION
8.19846	6.34042	TRANSLATION
2.1088	9.0642	PM
0.985272	9.12387	ER
1.77486	8.87128	ER
11.2618	11.4306	CYTOPLASM
12.6999	8.67109	PROTEIN-COMPLEX
3.67284	8.47122	PROTEIN-COMPLEX
12.4328	9.36775	PROTEIN-COMPLEX
12.6079	8.89512	PROTEIN-COMPLEX
12.5741	8.91762	PROTEIN-COMPLEX
12.7419	8.36465	PROTEIN-COMPLEX
11.1952	12.0371	CYTOPLASM
-1.96067	10.6115	PEROXISOME
-1.19286	11.0847	MITOCHONDRIA
-2.83456	11.7792	MITOCHONDRIA
10.2651	10.3414	CYTOPLASM
12.0184	11.7071	CYTOPLASM
11.8612	11.2959	CYTOPLASM
11.8305	11.1322	PROTEIN-COMPLEX
2.70871	7.63017	PM
-3.03602	12.7009	MITOCHONDRIA
0.984532	9.21527	ER
11.2398	12.111	CYTOPLASM
10.5407	11.0043	CYTOPLASM
-2.57829	13.3088	MITOCHONDRIA
-2.93276	12.6619	MITOCHONDRIA
8.43905	4.77235	TRANSLATION
-2.71675	13.2116	MITOCHONDRIA
11.106	12.5902	CYTOPLASM
1.08419	9.12834	ER
11.5113	12.1918	CYTOPLASM
11.5497	12.3615	CYTOPLASM
-2.6501	13.3038	MITOCHONDRIA
11.992	11.4987	CYTOPLASM
10.3329	11.4652	CYTOPLASM
11.6001	11.6837	CYTOPLASM
-2.98613	12.7579	MITOCHONDRIA
-2.9825	12.8209	MITOCHONDRIA
10.3696	10.1287	CYTOPLASM
5.38976	7.79546	GOLGI APPARATUS
11.4236	11.221	CYTOPLASM
9.96137	9.80584	CYTOPLASM
-2.66191	13.2302	MITOCHONDRIA
-2.08701	12.4441	MITOCHONDRIA
10.3317	11.509	CYTOPLASM
11.3699	11.5875	NUCLEUS
11.2497	12.0791	CYTOPLASM
12.0223	11.8673	CYTOPLASM
11.6759	12.2889	CYTOPLASM
11.9592	11.6916	CYTOPLASM
-3.35271	11.1891	MITOCHONDRIA
7.37344	5.02411	CYTOPLASM
10.5498	11.2686	CYTOPLASM
7.72081	9.55673	PM
8.12634	5.2834	TRANSLATION
10.6401	11.317	CYTOPLASM
-0.779856	11.0042	MITOCHONDRIA
4.59569	6.13159	GOLGI APPARATUS
-0.93918	8.35134	ER
2.63744	1.29238	PROTEIN-COMPLEX
-1.52461	9.05557	LYSOSOME
2.80115	8.6764	PM
11.3599	10.4145	CYTOPLASM
-2.74674	11.557	MITOCHONDRIA
10.5018	9.9343	CYTOPLASM
3.02154	8.03977	PM
-2.63273	13.2688	MITOCHONDRIA
-1.26212	7.3181	NUCLEUS
8.39242	4.7846	TRANSLATION
9.20583	11.0632	CYTOPLASM
-1.03808	8.85812	LYSOSOME
10.447	11.2649	CYTOPLASM
12.6312	8.02963	PROTEIN-COMPLEX
8.4435	11.6612	PROTEIN-COMPLEX
10.1985	9.4464	PROTEIN-COMPLEX
3.08115	7.99603	PM
10.1908	12.3071	CYTOPLASM
11.6611	12.3161	CYTOPLASM
-2.66118	13.119	MITOCHONDRIA
13.0439	8.17172	PROTEIN-COMPLEX
1.48452	7.98957	PM
10.2135	10.7386	CYTOPLASM
-3.2958	10.999	MITOCHONDRIA
-2.72401	13.196	MITOCHONDRIA
8.12758	5.26466	TRANSLATION
10.5297	11.3152	CYTOPLASM
2.72998	7.25116	ER
1.62674	8.949	ER
-2.9362	12.9058	MITOCHONDRIA
2.10032	7.53591	ER
11.1056	12.1732	CYTOPLASM
10.5174	11.1288	CYTOPLASM
-2.68939	13.2475	MITOCHONDRIA
1.63321	4.4632	NUCLEUS
1.47949	8.66523	ER
10.1869	9.54466	PROTEIN-COMPLEX
-2.78061	13.1545	MITOCHONDRIA
2.30842	4.98954	NUCLEUS
8.78879	12.1075	TRANSLATION
8.39785	4.76287	TRANSLATION
8.15741	5.18993	TRANSLATION
11.6429	10.5421	PROTEIN-COMPLEX
12.6326	9.03792	PROTEIN-COMPLEX
8.20241	5.02796	TRANSLATION
12.7194	9.03529	CYTOPLASM
10.1588	9.69796	CYTOPLASM
-2.70351	13.2877	MITOCHONDRIA
-0.252392	5.0946	NUCLEUS
7.88423	6.01573	TRANSLATION
2.29037	3.83039	NUCLEUS
9.16113	6.87766	TRANSLATION
10.3173	10.081	CYTOPLASM
9.93616	9.63438	CYTOPLASM
12.4743	8.42242	PROTEIN-COMPLEX
-2.55725	13.312	MITOCHONDRIA
-1.85631	10.2082	NUCLEUS
-0.378019	5.12336	NUCLEUS
10.7333	9.53056	PROTEIN-COMPLEX
12.5173	8.84196	PROTEIN-COMPLEX
11.6258	11.6864	CYTOPLASM
8.31967	4.78766	TRANSLATION
-3.05301	12.0648	MITOCHONDRIA
-3.06217	12.7421	MITOCHONDRIA
8.20739	5.28347	TRANSLATION
11.4974	12.1742	CYTOPLASM
-0.306416	9.03592	LYSOSOME
10.8138	9.67765	PROTEIN-COMPLEX
-2.7275	13.1966	MITOCHONDRIA
1.38399	7.81571	ER
-3.11362	12.2644	MITOCHONDRIA
11.6867	12.367	CYTOPLASM
12.6303	8.80816	PROTEIN-COMPLEX
-3.06669	12.333	MITOCHONDRIA
9.75165	10.9103	CYTOPLASM
-3.30528	11.4649	MITOCHONDRIA
-3.01242	12.6159	MITOCHONDRIA
10.4094	10.3968	CYTOPLASM
10.4847	10.0713	CYTOPLASM
12.6742	8.91605	PROTEIN-COMPLEX
10.5173	11.278	NUCLEUS
1.13987	3.88496	NUCLEUS
0.681171	3.76761	NUCLEUS
0.19547	7.36222	MITOCHONDRIA
10.0407	9.73653	CYTOPLASM
8.16469	5.15517	TRANSLATION
8.25019	4.95503	TRANSLATION
8.11401	5.29444	TRANSLATION
8.17398	5.2289	TRANSLATION
8.29617	4.90018	TRANSLATION
8.39655	4.7842	TRANSLATION
8.31069	4.87456	TRANSLATION
9.80547	9.61738	CYTOPLASM
4.46064	9.16121	PM
10.4522	9.49055	PROTEIN-COMPLEX
1.25148	8.58212	ER
10.1433	9.15528	CYTOPLASM
10.5428	10.5431	CYTOPLASM
10.6975	10.208	PROTEIN-COMPLEX
-2.46305	13.0837	MITOCHONDRIA
9.74994	10.1918	CYTOPLASM
11.1326	12.6517	CYTOPLASM
10.5939	8.9252	ENDOSOME-VESICLE
1.90892	8.85244	ER
10.4393	11.3988	CYTOPLASM
12.7731	8.43431	PROTEIN-COMPLEX
12.5468	9.17841	PROTEIN-COMPLEX
1.77567	8.93468	ER
-2.99906	12.7948	MITOCHONDRIA
10.4261	10.5217	CYTOPLASM
2.10647	8.45743	ER
9.97666	10.0622	CYTOPLASM
8.30741	5.25916	TRANSLATION
11.2167	12.1896	CYTOPLASM
12.031	12.1157	PROTEIN-COMPLEX
12.5878	9.10267	PROTEIN-COMPLEX
-3.03138	12.5198	MITOCHONDRIA
-2.69144	13.1782	MITOCHONDRIA
11.1742	12.2142	CYTOPLASM
10.3913	11.1874	CYTOPLASM
10.9732	11.432	CYTOPLASM
3.53117	9.95397	GOLGI APPARATUS
10.2019	10.5971	CYTOPLASM
3.53959	3.52161	NUCLEUS
12.7274	8.43476	PROTEIN-COMPLEX
12.4702	9.03221	PROTEIN-COMPLEX
1.12428	4.05709	NUCLEUS
-3.31309	10.9364	MITOCHONDRIA
-1.90455	12.4897	MITOCHONDRIA
4.98058	7.89092	GOLGI APPARATUS
2.94175	5.57809	NUCLEUS
7.88172	5.98935	TRANSLATION
11.211	12.5224	CYTOPLASM
1.60678	4.20961	NUCLEUS
1.89437	4.05049	NUCLEUS
10.5208	11.0072	CYTOPLASM
2.29801	9.16982	PM
-2.67577	13.2305	MITOCHONDRIA
12.0626	11.9902	CYTOPLASM
10.4847	10.0193	CYTOPLASM
1.28138	8.69768	ER
9.31763	7.13091	MITOCHONDRIA
1.19861	8.00837	ER
12.0092	11.7453	CYTOPLASM
10.2886	9.45319	PROTEIN-COMPLEX
11.8908	11.9192	CYTOPLASM
8.23171	5.23552	TRANSLATION
12.6625	9.08654	PROTEIN-COMPLEX
12.5864	9.07734	PROTEIN-COMPLEX
2.73794	8.34146	ER
3.05458	9.49874	ER
-3.19416	11.83	MITOCHONDRIA
5.15803	6.44354	PM
-2.97416	12.6921	MITOCHONDRIA
10.5002	11.1742	CYTOPLASM
0.973019	8.62107	ER
1.88285	9.22425	ER
-3.00659	12.6114	MITOCHONDRIA
-1.90187	10.0899	PEROXISOME
12.7113	8.48921	PROTEIN-COMPLEX
-2.4946	13.2896	MITOCHONDRIA
-1.06655	8.9231	LYSOSOME
10.4529	10.121	CYTOPLASM
6.57252	7.30928	ENDOSOME-VESICLE
4.64641	7.83521	PM
-2.94733	12.8033	MITOCHONDRIA
1.1108	5.77431	NUCLEUS
7.34589	4.9942	NUCLEUS
10.7371	9.84218	CYTOPLASM
11.3191	12.2827	CYTOPLASM
10.6068	11.3304	CYTOPLASM
2.94326	5.10323	MITOCHONDRIA
-2.88297	12.4859	MITOCHONDRIA
4.60235	6.2115	GOLGI APPARATUS
4.3637	6.04074	GOLGI APPARATUS
10.5076	11.1471	CYTOPLASM
10.3563	10.1769	CYTOPLASM
9.6185	10.2088	NUCLEUS
10.3009	10.3534	CYTOPLASM
-2.87108	12.8964	MITOCHONDRIA
11.6339	11.9991	CYTOPLASM
-2.64299	13.1741	MITOCHONDRIA
11.2039	11.948	CYTOPLASM
11.4715	9.33171	PROTEIN-COMPLEX
11.7608	7.96948	PROTEIN-COMPLEX
7.56787	6.33502	TRANSLATION
-3.2385	11.7857	MITOCHONDRIA
10.4745	10.1206	CYTOPLASM
10.5888	8.97331	ENDOSOME-VESICLE
-1.30802	8.76503	LYSOSOME
9.93566	9.18395	ENDOSOME-VESICLE
-2.48247	13.3311	MITOCHONDRIA
2.17576	9.18396	PM
2.97412	7.95064	ER
10.5715	11.1369	CYTOPLASM
11.684	9.46063	PROTEIN-COMPLEX
11.4545	9.35932	PROTEIN-COMPLEX
-1.45903	8.79201	LYSOSOME
-1.10475	8.6101	LYSOSOME
-2.50339	13.1026	MITOCHONDRIA
-3.30156	11.0544	MITOCHONDRIA
10.865	11.304	CYTOPLASM
1.67598	7.8713	PM
12.5674	8.67195	PROTEIN-COMPLEX
10.301	10.0012	CYTOPLASM
2.84864	4.04436	LD
1.40249	8.05453	ER
11.8289	10.8492	PROTEIN-COMPLEX
-2.67861	12.9224	MITOCHONDRIA
0.682705	8.69018	ER
10.2473	10.5864	CYTOPLASM
10.3796	10.9884	CYTOPLASM
0.939081	5.57574	NUCLEUS
7.62388	9.52136	PM
10.5208	9.79839	ENDOSOME-VESICLE
-2.59675	12.816	MITOCHONDRIA
-2.8067	13.2778	MITOCHONDRIA
8.56038	6.74663	TRANSLATION
11.2574	12.3897	CYTOPLASM
3.20697	8.7216	GOLGI APPARATUS
4.64095	5.91933	GOLGI APPARATUS
-2.44928	13.3348	MITOCHONDRIA
-3.1017	12.5738	MITOCHONDRIA
3.50049	6.97074	NUCLEUS
6.56139	7.31829	GOLGI APPARATUS
2.77059	3.76044	LD
1.81991	4.07461	NUCLEUS
10.108	9.65815	CYTOPLASM
11.8684	12.1432	CYTOPLASM
2.38294	4.19497	MITOCHONDRIA
8.61146	6.75368	TRANSLATION
1.17639	8.09239	ER
10.0357	9.8416	CYTOPLASM
3.0099	2.88159	LD
10.7515	11.4869	CYTOPLASM
8.32765	4.87542	TRANSLATION
12.6586	9.05474	PROTEIN-COMPLEX
1.48082	8.29585	ER
8.55355	9.70421	CYTOPLASM
3.52296	8.1153	GOLGI APPARATUS
3.89649	8.87539	ENDOSOME-VESICLE
10.5021	10.7638	CYTOPLASM
4.94121	7.96408	GOLGI APPARATUS
11.6885	11.9375	CYTOPLASM
7.00158	7.15929	ENDOSOME-VESICLE
12.3655	8.42985	PROTEIN-COMPLEX
11.5005	10.6893	PROTEIN-COMPLEX
10.3801	10.6817	CYTOPLASM
8.62636	6.8546	TRANSLATION
3.52611	8.30267	PM
2.85503	3.70445	PM
8.31768	4.88917	TRANSLATION
8.29662	4.85086	TRANSLATION
8.13562	5.26662	TRANSLATION
8.23691	4.93705	TRANSLATION
9.63641	8.69356	NUCLEUS
3.57344	8.498	ENDOSOME-VESICLE
-2.37622	13.1265	MITOCHONDRIA
11.8766	12.2086	CYTOPLASM
9.85144	9.7635	CYTOPLASM
5.8983	7.40666	GOLGI APPARATUS
5.85759	7.41003	GOLGI APPARATUS
1.84729	4.06772	NUCLEUS
11.0218	11.7992	CYTOPLASM
-1.74383	12.6537	MITOCHONDRIA
8.31651	4.89967	TRANSLATION
12.5946	8.88327	PROTEIN-COMPLEX
13.0666	8.22646	PROTEIN-COMPLEX
8.36098	4.82632	TRANSLATION
8.21654	5.02692	TRANSLATION
8.23397	5.03736	TRANSLATION
11.133	12.5081	CYTOPLASM
11.0283	11.8792	CYTOPLASM
8.29693	4.82349	TRANSLATION
8.32331	4.82183	TRANSLATION
6.38677	10.74	TRANSLATION
8.36447	4.83702	TRANSLATION
1.9469	4.30015	NUCLEUS
10.438	12.8186	CYTOPLASM
8.16153	5.32195	TRANSLATION
8.33374	4.85097	TRANSLATION
11.6004	10.4192	PROTEIN-COMPLEX
8.08073	5.29134	TRANSLATION
8.27318	4.90765	TRANSLATION
8.37694	5.22301	TRANSLATION
3.33479	8.46657	PM
8.24926	5.32899	TRANSLATION
2.23696	7.94559	PM
2.97347	7.7303	PM
9.03858	5.17107	TRANSLATION
8.34416	4.8779	TRANSLATION
8.35744	4.84184	TRANSLATION
8.03218	5.22755	TRANSLATION
1.99189	4.04832	NUCLEUS
2.63626	7.41644	PM
3.76159	8.9175	PM
10.7483	10.0579	CYTOPLASM
11.8355	9.93499	PROTEIN-COMPLEX
8.29776	4.93859	TRANSLATION
8.34567	4.76954	TRANSLATION
11.0126	11.2451	CYTOPLASM
8.41493	4.76003	TRANSLATION
11.2674	12.093	CYTOPLASM
11.7645	12.3253	CYTOPLASM
11.5153	12.2658	CYTOPLASM
2.30789	3.79821	NUCLEUS
7.87565	5.92905	TRANSLATION
12.5723	9.18656	PROTEIN-COMPLEX
9.57294	8.98226	TRANSLATION
1.61552	4.88011	NUCLEUS
2.6291	6.75325	PM
11.2349	12.2681	CYTOPLASM
8.34658	4.87447	NUCLEUS
5.70466	7.10962	GOLGI APPARATUS
1.93736	7.9389	ER
4.9075	5.87462	GOLGI APPARATUS
-3.08113	12.4704	MITOCHONDRIA
-3.28333	11.6802	MITOCHONDRIA
-3.18299	11.1545	MITOCHONDRIA
-3.28969	10.8369	MITOCHONDRIA
-2.72589	13.1575	MITOCHONDRIA
-2.31515	12.0799	MITOCHONDRIA
-2.50695	12.2441	MITOCHONDRIA
-3.28945	11.6164	MITOCHONDRIA
-3.10101	12.5573	MITOCHONDRIA
-2.9901	12.4573	MITOCHONDRIA
-2.88912	12.6605	MITOCHONDRIA
10.7068	9.4489	PROTEIN-COMPLEX
8.18159	5.31606	TRANSLATION
1.19323	5.30313	NUCLEUS
7.90554	6.09473	TRANSLATION
2.12243	5.04864	NUCLEUS
12.387	9.26528	PROTEIN-COMPLEX
6.72369	6.91767	ENDOSOME-VESICLE
7.7862	9.40625	PM
0.796324	4.39909	NUCLEUS
8.48886	7.12832	TRANSLATION
-2.96187	12.9095	MITOCHONDRIA
10.528	11.0577	CYTOPLASM
-3.13869	12.2727	MITOCHONDRIA
2.97152	5.17406	PROTEIN-COMPLEX
2.74301	8.49527	ER
1.78613	4.10115	NUCLEUS
10.6201	9.83706	PROTEIN-COMPLEX
10.0698	10.2192	PROTEIN-COMPLEX
10.3047	10.3136	CYTOPLASM
-1.27316	8.78064	LYSOSOME
11.3643	12.0001	CYTOPLASM
12.0775	9.76582	PROTEIN-COMPLEX
10.3423	11.1685	CYTOPLASM
6.42011	10.783	LYSOSOME
10.257	9.75046	CYTOPLASM
11.2546	12.2817	CYTOPLASM
-3.09982	12.4206	MITOCHONDRIA
-2.98709	12.5999	MITOCHONDRIA
-2.72734	13.182	MITOCHONDRIA
10.3945	10.902	CYTOPLASM
10.6297	11.5103	CYTOPLASM
5.51498	6.83586	GOLGI APPARATUS
8.07344	5.25104	TRANSLATION
1.4897	4.45698	NUCLEUS
11.3825	12.065	CYTOPLASM
-2.80036	12.457	MITOCHONDRIA
1.33487	8.49193	PM
9.76699	9.47031	CYTOPLASM
0.956732	5.63397	NUCLEUS
10.5069	9.90673	CYTOPLASM
8.30227	7.04971	TRANSLATION
3.93652	9.0415	PM
10.9886	12.6555	CYTOPLASM
-2.73989	13.2353	MITOCHONDRIA
4.83439	5.30532	NUCLEUS
10.2813	10.6498	CYTOPLASM
10.2251	9.55883	CYTOPLASM
1.39485	4.32441	NUCLEUS
10.2494	9.6535	CYTOPLASM
10.2508	9.71025	CYTOPLASM
10.9514	9.48854	PROTEIN-COMPLEX
8.8078	7.17529	NUCLEUS
11.7814	12.0672	CYTOPLASM
-0.717255	10.9688	MITOCHONDRIA
-2.54542	10.4687	ER
1.11797	5.41686	NUCLEUS
6.47167	7.19833	ENDOSOME-VESICLE
10.8848	11.7179	CYTOPLASM
8.15955	9.68821	NUCLEUS
-0.475195	11.0213	MITOCHONDRIA
11.6748	11.4273	PROTEIN-COMPLEX
-1.95315	10.3093	PEROXISOME
11.231	11.965	CYTOPLASM
10.2309	8.96064	ENDOSOME-VESICLE
8.38652	6.35635	TRANSLATION
11.2725	11.5392	NUCLEUS
3.9328	8.59305	GOLGI APPARATUS
11.1354	11.9103	CYTOPLASM
4.76551	6.02827	GOLGI APPARATUS
4.80816	6.0982	GOLGI APPARATUS
4.8644	5.99992	GOLGI APPARATUS
-3.08293	12.4971	MITOCHONDRIA
5.11278	5.74917	GOLGI APPARATUS
11.104	12.2096	CYTOPLASM
2.15311	9.14445	ER
11.7183	12.123	CYTOPLASM
3.10368	7.62158	NUCLEUS
1.6941	3.20578	NUCLEUS
11.0554	9.92149	PROTEIN-COMPLEX
4.03793	9.66583	ER
-0.438057	8.51388	ER
2.32606	8.92609	PM
-0.707397	10.9066	MITOCHONDRIA
8.77581	7.15262	NUCLEUS
1.38191	4.34342	NUCLEUS
8.08549	9.65502	NUCLEUS
8.29817	4.86797	NUCLEUS
-0.665343	10.5431	MITOCHONDRIA
1.94895	8.9909	ER
-1.72283	12.6559	MITOCHONDRIA
10.2178	9.59342	CYTOPLASM
10.8647	9.40163	PROTEIN-COMPLEX
10.3256	9.38609	PROTEIN-COMPLEX
-3.20643	11.818	MITOCHONDRIA
12.9809	9.32926	PROTEIN-COMPLEX
12.7039	8.99625	PROTEIN-COMPLEX
10.2386	9.71948	CYTOPLASM
12.3526	9.12328	PROTEIN-COMPLEX
9.60513	10.1599	CYTOPLASM
10.2172	11.1602	CYTOPLASM
0.147671	8.39521	NUCLEUS
10.4145	10.6293	CYTOPLASM
0.815963	9.07448	ER
3.57277	8.21816	GOLGI APPARATUS
13.1118	8.3071	PROTEIN-COMPLEX
-0.903201	11.5094	MITOCHONDRIA
8.23068	9.63958	NUCLEUS
9.16099	6.83533	TRANSLATION
1.57457	4.25717	NUCLEUS
0.194305	8.52328	PM
10.6706	11.6243	CYTOPLASM
8.63984	6.77363	TRANSLATION
10.3748	11.1467	CYTOPLASM
1.86245	8.89037	ER
12.1852	9.57077	CYTOPLASM
8.45168	5.95457	GOLGI APPARATUS
-2.60534	11.358	MITOCHONDRIA
12.4302	8.58253	PROTEIN-COMPLEX
-3.06148	12.3784	MITOCHONDRIA
3.86644	9.0413	PM
2.64768	3.63787	NUCLEUS
2.639	6.91879	PM
0.918158	4.6997	NUCLEUS
0.815659	9.18227	ER
5.08041	7.80086	GOLGI APPARATUS
4.65606	9.81009	PM
-3.20341	11.344	MITOCHONDRIA
2.62906	1.82161	NUCLEUS
10.5699	12.6063	CYTOPLASM
10.1286	9.78037	CYTOPLASM
1.75055	3.15042	NUCLEUS
11.9423	10.6097	PROTEIN-COMPLEX
1.53079	7.74119	ER
2.10032	3.58979	NUCLEUS
10.2872	9.31656	PROTEIN-COMPLEX
10.3568	9.09025	PROTEIN-COMPLEX
10.393	11.5759	CYTOPLASM
7.09539	7.05177	ENDOSOME-VESICLE
2.96633	8.34539	PM
4.9384	9.94349	ER
8.38985	4.87302	TRANSLATION
4.84494	6.2158	GOLGI APPARATUS
-2.71215	13.1766	MITOCHONDRIA
11.8521	11.7617	CYTOPLASM
4.48872	9.44798	PM
11.0931	12.662	CYTOPLASM
10.4991	11.1023	CYTOPLASM
9.92363	9.35251	CYTOPLASM
7.77529	6.3251	TRANSLATION
11.2003	12.1967	CYTOPLASM
10.422	10.5448	CYTOPLASM
7.38808	5.02075	TRANSLATION
8.34227	6.89339	TRANSLATION
4.52973	9.23851	PM
1.50716	3.46231	NUCLEUS
1.61572	4.36714	NUCLEUS
8.51395	6.80828	TRANSLATION
11.2554	10.1439	PROTEIN-COMPLEX
1.16488	8.77883	ER
10.0223	10.0023	CYTOPLASM
11.0218	11.9202	CYTOPLASM
11.3981	11.9822	CYTOPLASM
12.6934	8.2327	PROTEIN-COMPLEX
8.11861	6.19395	TRANSLATION
8.73063	7.33537	TRANSLATION
9.42932	9.51198	CYTOPLASM
0.900485	9.15067	ER
2.55419	3.9951	MITOCHONDRIA
9.56689	10.4048	CYTOPLASM
2.61238	7.29614	PM
10.5513	11.3125	CYTOPLASM
11.674	11.694	CYTOPLASM
2.19399	4.5914	NUCLEUS
-2.36005	10.2748	ER
12.2059	9.56419	PROTEIN-COMPLEX
1.41808	8.17755	ER
7.54574	5.15888	PM
1.62096	8.03697	ER
10.8308	9.50316	PROTEIN-COMPLEX
1.03529	9.09611	ER
1.26439	8.61866	ER
2.29008	7.36982	PM
5.0594	5.76346	GOLGI APPARATUS
2.05467	8.37756	ER
4.91132	6.2245	GOLGI APPARATUS
11.3631	12.4239	CYTOPLASM
12.6237	8.89278	PROTEIN-COMPLEX
4.58152	8.42692	GOLGI APPARATUS
1.03109	8.68878	ER
13.1572	8.23806	PROTEIN-COMPLEX
8.03106	9.33647	CYTOPLASM
1.1058	4.99409	NUCLEUS
-3.21246	11.8665	MITOCHONDRIA
7.09529	7.80726	ENDOSOME-VESICLE
10.509	9.38933	CYTOPLASM
11.5564	12.3536	CYTOPLASM
11.5275	12.3036	CYTOPLASM
-2.09142	10.0758	PEROXISOME
-2.03941	10.1805	PEROXISOME
0.808065	9.09138	ER
-2.6778	13.234	MITOCHONDRIA
-2.80946	13.0763	MITOCHONDRIA
10.8272	12.641	CYTOPLASM
1.39447	8.81754	ER
10.7419	10.8647	CYTOPLASM
10.0223	9.78961	CYTOPLASM
1.30317	5.37253	NUCLEUS
3.12859	6.31547	PM
1.62861	9.13802	ER
5.28084	7.66522	GOLGI APPARATUS
9.62081	9.64571	CYTOPLASM
13.0901	8.2628	PROTEIN-COMPLEX
-1.7749	9.6228	MITOCHONDRIA
1.78676	8.84753	ER
1.41972	5.25662	NUCLEUS
1.64653	3.63659	NUCLEUS
5.28653	7.16262	NUCLEUS
1.05433	4.07531	NUCLEUS
-1.08029	7.42409	NUCLEUS
10.8674	11.7091	CYTOPLASM
-2.87022	12.9917	MITOCHONDRIA
1.33143	8.1676	ER
8.41773	4.82711	NUCLEUS
5.22995	6.36755	GOLGI APPARATUS
2.64147	1.30733	NUCLEUS
2.11965	2.76063	NUCLEUS
8.88243	6.84102	TRANSLATION
10.1839	10.1768	CYTOPLASM
10.5062	11.1263	CYTOPLASM
2.55121	6.53117	LD
3.17026	8.33409	PM
11.6858	12.1762	CYTOPLASM
10.3248	8.88097	CYTOPLASM
1.3913	8.54594	ER
-0.551383	4.05654	CYTOPLASM
1.62663	7.5675	ER
2.73856	8.36414	ER
5.83902	7.53746	ENDOSOME-VESICLE
-2.76286	13.1104	MITOCHONDRIA
12.6085	8.14964	PROTEIN-COMPLEX
10.3605	10.0772	CYTOPLASM
-0.841206	8.19722	GOLGI APPARATUS
11.5382	9.62705	PROTEIN-COMPLEX
10.434	11.2465	CYTOPLASM
-3.25543	11.2476	MITOCHONDRIA
11.6972	11.9613	CYTOPLASM
5.34294	7.08254	GOLGI APPARATUS
7.16137	6.89823	ENDOSOME-VESICLE
-1.66215	11.9597	MITOCHONDRIA
10.508	9.98726	CYTOPLASM
0.79013	4.35842	NUCLEUS
-2.84203	13.0553	MITOCHONDRIA
11.8528	9.80896	GOLGI APPARATUS
-1.33224	12.2351	MITOCHONDRIA
-2.67523	13.2242	MITOCHONDRIA
-3.26534	11.6532	MITOCHONDRIA
8.95669	10.8314	MITOCHONDRIA
-2.57377	13.1299	MITOCHONDRIA
-1.73351	12.4775	MITOCHONDRIA
-2.01193	12.8601	MITOCHONDRIA
1.06037	5.37189	NUCLEUS
1.20008	4.2802	NUCLEUS
10.4734	9.81437	PROTEIN-COMPLEX
2.38793	8.3718	ER
7.10601	7.00424	ENDOSOME-VESICLE
12.0203	11.8691	CYTOPLASM
11.7385	8.35121	CYTOPLASM
-2.67822	13.0972	MITOCHONDRIA
-3.09885	10.9959	MITOCHONDRIA
10.7886	8.79494	CYTOPLASM
-3.07279	12.4194	MITOCHONDRIA
8.18154	5.29655	NUCLEUS
-2.93816	12.8606	MITOCHONDRIA
1.80383	8.79394	ER
-3.18299	12.0991	MITOCHONDRIA
-2.56239	12.9535	MITOCHONDRIA
0.555167	9.09298	ER
11.6254	11.671	NUCLEUS
2.87713	1.94595	NUCLEUS
2.2464	8.76077	ER
-0.303841	5.04288	NUCLEUS
10.1628	9.15111	PROTEIN-COMPLEX
-3.07106	12.3198	MITOCHONDRIA
-3.15193	11.2773	MITOCHONDRIA
2.02309	8.96149	PM
-2.60048	13.1556	MITOCHONDRIA
-3.26662	11.8034	MITOCHONDRIA
2.05988	7.45433	ER
11.8393	12.1018	CYTOPLASM
8.36694	4.85115	TRANSLATION
10.0773	9.63677	CYTOPLASM
-0.531131	11.1825	MITOCHONDRIA
-2.77062	11.8617	MITOCHONDRIA
0.922421	8.44151	ER
1.05649	8.66589	ER
-2.94198	12.9369	MITOCHONDRIA
10.2352	11.1392	CYTOPLASM
-2.23454	12.9015	MITOCHONDRIA
1.85398	6.83354	NUCLEUS
-0.485667	10.9201	MITOCHONDRIA
2.38609	4.06808	NUCLEUS
1.82971	8.86066	ER
1.61051	7.9923	ER
10.9402	9.58754	NUCLEUS
-2.56157	13.2918	MITOCHONDRIA
1.56712	4.29923	NUCLEUS
10.304	10.4254	CYTOPLASM
11.2609	9.85335	CYTOPLASM
-3.05957	12.319	MITOCHONDRIA
3.24651	8.44559	GOLGI APPARATUS
10.599	9.40338	NUCLEUS
4.47845	6.17604	GOLGI APPARATUS
1.54977	3.57254	NUCLEUS
2.01248	8.62096	ER
11.8204	12.087	CYTOPLASM
-2.84961	11.6072	MITOCHONDRIA
-2.50146	13.2845	MITOCHONDRIA
7.17415	7.96175	ENDOSOME-VESICLE
2.52882	6.62338	PM
7.11235	7.0062	ENDOSOME-VESICLE
-2.74197	13.2193	MITOCHONDRIA
10.7926	9.53907	PROTEIN-COMPLEX
11.5789	11.8452	CYTOPLASM
11.6952	11.9606	GOLGI APPARATUS
-3.34841	11.3768	MITOCHONDRIA
-3.23206	11.3112	MITOCHONDRIA
3.50288	8.58475	ER
10.6714	10.1892	CYTOPLASM
-3.29031	11.5695	MITOCHONDRIA
3.12324	5.20672	LD
-0.596017	3.96205	NUCLEUS
10.2511	9.08596	ENDOSOME-VESICLE
-3.00399	11.352	MITOCHONDRIA
11.3424	12.1841	CYTOPLASM
8.46579	9.30635	CYTOPLASM
9.02191	6.64358	TRANSLATION
10.3358	9.34818	PROTEIN-COMPLEX
10.2973	9.43521	CYTOPLASM
11.8651	8.54533	PROTEIN-COMPLEX
11.6836	11.4594	PROTEIN-COMPLEX
6.61479	6.99338	ENDOSOME-VESICLE
10.1509	9.94312	CYTOPLASM
2.76541	4.03631	LD
7.15002	6.97623	ENDOSOME-VESICLE
1.02796	3.90666	NUCLEUS
10.5942	11.4895	CYTOPLASM
10.9662	11.0514	TRANSLATION
2.67038	8.59824	ER
1.94791	3.05943	NUCLEUS
-2.90957	12.4319	MITOCHONDRIA
2.38209	7.11999	PM
10.9691	12.0659	CYTOPLASM
11.4693	9.38268	CYTOPLASM
1.82537	9.14474	PM
11.7538	12.3272	CYTOPLASM
-0.324965	4.92188	NUCLEUS
-2.34935	13.2998	MITOCHONDRIA
9.9232	9.46531	MITOCHONDRIA
1.93853	9.10056	ER
-2.7546	13.15	MITOCHONDRIA
3.30335	8.57728	ER
2.16695	8.43189	ER
2.32347	8.21549	ER
-2.84763	13.0517	MITOCHONDRIA
2.81779	6.0787	PM
-2.26612	13.2178	MITOCHONDRIA
-1.54586	9.2042	MITOCHONDRIA
2.11331	8.89699	ER
1.79687	8.52928	ER
10.1434	10.7384	CYTOPLASM
-2.38836	12.7473	MITOCHONDRIA
1.02025	3.58828	NUCLEUS
1.9331	3.77877	NUCLEUS
-2.68026	12.7409	MITOCHONDRIA
-1.28035	8.74277	LYSOSOME
4.52822	6.08304	GOLGI APPARATUS
-2.58028	13.3706	MITOCHONDRIA
-2.71367	13.202	MITOCHONDRIA
9.13708	9.68994	CYTOPLASM
1.97269	9.10152	PM
-0.321621	4.64816	NUCLEUS
11.2273	12.2056	CYTOPLASM
-3.07456	12.5066	MITOCHONDRIA
-3.26372	11.7346	MITOCHONDRIA
8.37592	4.91538	ENDOSOME-VESICLE
2.28849	7.85557	PM
8.49713	6.77275	TRANSLATION
8.35842	8.85696	GOLGI APPARATUS
12.5962	8.38319	PROTEIN-COMPLEX
11.7949	11.704	CYTOPLASM
3.78645	9.05442	PM
2.78362	9.37811	ER
-2.78191	12.5683	MITOCHONDRIA
10.9018	12.7478	CYTOPLASM
1.5191	9.15456	ER
4.28896	6.04499	GOLGI APPARATUS
2.83146	6.87155	GOLGI APPARATUS
1.19872	9.07479	ER
11.3171	12.0291	CYTOPLASM
1.82856	8.07358	ER
1.22324	8.62183	ER
4.7886	7.94113	PM
10.3958	9.4232	CYTOPLASM
-2.67907	12.9499	MITOCHONDRIA
0.955564	9.17889	ER
4.19663	6.09611	GOLGI APPARATUS
-2.08299	10.2874	ER
2.93402	2.02896	LD
-1.99701	10.3158	PEROXISOME
-2.40155	10.2686	ER
-2.26609	10.2459	ER
8.37271	4.81591	TRANSLATION
-0.359001	9.5818	ER
[truncated: 857 more rows]

## Sheet: 02_C_lower
after upsampling
UMAP1	UMAP2	marker
12.6578	8.541	PROTEIN-COMPLEX
10.5402	11.9826	CYTOPLASM
-0.924364	8.96648	LYSOSOME
10.7752	10.9263	CYTOPLASM
7.07056	7.01409	ENDOSOME-VESICLE
-2.18011	13.183	MITOCHONDRIA
1.66806	2.97888	NUCLEUS
1.88958	8.835	ER
6.23342	7.46536	ENDOSOME-VESICLE
2.77663	8.46127	LYSOSOME
1.75102	3.00409	NUCLEUS
5.70304	7.32405	GOLGI APPARATUS
1.27338	8.63349	ER
7.11648	6.94406	ENDOSOME-VESICLE
1.3885	3.56707	NUCLEUS
1.74875	8.1206	ER
8.02282	6.55489	NUCLEUS
8.92305	6.46342	TRANSLATION
10.3066	10.371	CYTOPLASM
10.2306	9.16856	PROTEIN-COMPLEX
11.6437	11.7594	CYTOPLASM
-2.43484	13.2501	MITOCHONDRIA
1.64651	3.4642	NUCLEUS
-0.427451	4.67983	NUCLEUS
7.07573	6.91279	ENDOSOME-VESICLE
-1.92974	12.3777	MITOCHONDRIA
7.06268	6.85178	ENDOSOME-VESICLE
-3.17738	12.0303	MITOCHONDRIA
10.9055	10.8063	CYTOPLASM
1.46039	8.31795	ER
-2.79892	13.234	MITOCHONDRIA
11.6853	11.6035	CYTOPLASM
11.643	9.83373	PROTEIN-COMPLEX
10.7329	11.7457	CYTOPLASM
1.61916	8.8111	ER
1.98887	3.10495	NUCLEUS
8.56928	6.77969	TRANSLATION
-2.91303	12.9363	MITOCHONDRIA
8.59236	6.26602	TRANSLATION
10.2351	10.5294	PROTEIN-COMPLEX
8.85627	6.19461	NUCLEUS
-3.00831	12.5287	MITOCHONDRIA
1.42728	3.78268	NUCLEUS
11.7154	8.7782	PROTEIN-COMPLEX
2.10905	5.11867	NUCLEUS
8.33089	5.24796	NUCLEUS
12.6331	8.80743	PROTEIN-COMPLEX
10.8945	9.3495	PROTEIN-COMPLEX
3.78132	8.55314	PM
1.92984	2.84262	NUCLEUS
2.54678	6.48242	ER
4.68245	7.8426	NUCLEUS
11.9906	11.7238	CYTOPLASM
9.66761	9.66691	ENDOSOME-VESICLE
11.3002	12.1835	CYTOPLASM
1.60121	3.56795	NUCLEUS
3.72942	3.21117	NUCLEUS
2.82463	3.27749	LD
3.50916	6.93176	PROTEIN-COMPLEX
10.6192	9.72178	PROTEIN-COMPLEX
1.67345	3.02905	NUCLEUS
1.06426	9.19507	LYSOSOME
10.2908	11.34	CYTOPLASM
10.3367	10.443	CYTOPLASM
1.20999	8.50235	ER
-1.04837	8.88749	LYSOSOME
10.4077	11.1586	CYTOPLASM
-2.93478	12.7198	MITOCHONDRIA
1.83322	3.09292	NUCLEUS
10.4707	9.3239	PROTEIN-COMPLEX
12.2486	8.35832	CYTOPLASM
10.1093	9.70531	PROTEIN-COMPLEX
-2.67986	13.1848	MITOCHONDRIA
8.15238	9.89614	CYTOPLASM
1.90934	3.38446	NUCLEUS
-2.53831	13.3211	MITOCHONDRIA
10.3408	9.66586	PROTEIN-COMPLEX
11.641	12.301	CYTOPLASM
2.61862	1.35219	NUCLEUS
2.33946	7.94388	ER
4.85763	6.08858	GOLGI APPARATUS
6.87221	7.01602	GOLGI APPARATUS
7.87324	9.60428	PM
3.74081	3.00477	NUCLEUS
-1.42341	8.81592	LYSOSOME
8.36634	4.79941	TRANSLATION
9.79323	9.43749	NUCLEUS
-3.17439	12.0719	MITOCHONDRIA
-1.84793	12.3273	MITOCHONDRIA
5.84301	10.1261	NUCLEUS
-2.66031	13.2246	MITOCHONDRIA
3.02593	8.06608	PM
12.0556	11.8319	CYTOPLASM
1.62886	9.22324	ER
4.13345	9.48799	LYSOSOME
8.03728	9.5409	ENDOSOME-VESICLE
11.0074	9.6512	NUCLEUS
4.81331	6.42494	GOLGI APPARATUS
-2.53131	13.2341	MITOCHONDRIA
1.11432	8.65304	PM
12.5298	8.62648	PROTEIN-COMPLEX
-1.91389	10.6571	MITOCHONDRIA
11.4043	11.7886	CYTOPLASM
4.54918	9.30145	PM
1.50142	4.81949	NUCLEUS
0.869512	9.21937	ER
0.825764	9.03104	ER
10.3692	11.6631	LD
10.4793	11.6784	LD
10.4871	11.4287	CYTOPLASM
7.34206	4.98522	MITOCHONDRIA
10.3029	10.7682	CYTOPLASM
9.27255	7.13851	MITOCHONDRIA
2.994	7.88034	PM
3.12651	8.12193	PM
1.79741	9.098	ER
-3.21052	11.5661	MITOCHONDRIA
-2.76051	12.9935	MITOCHONDRIA
10.7639	11.5956	CYTOPLASM
-0.731391	11.0975	MITOCHONDRIA
10.6	10.5656	CYTOPLASM
5.74759	5.13567	ENDOSOME-VESICLE
-0.890375	8.83615	LYSOSOME
4.55961	9.17336	PM
2.63773	1.29802	NUCLEUS
8.34799	4.91849	NUCLEUS
12.9619	9.34527	PM
10.7913	9.42422	CYTOPLASM
2.22657	8.96902	LYSOSOME
-0.962164	8.84035	LYSOSOME
1.06683	9.06843	ER
11.1605	11.7978	CYTOPLASM
-2.8366	12.676	MITOCHONDRIA
10.0417	9.82479	CYTOPLASM
-2.40777	13.2735	MITOCHONDRIA
2.2849	7.46029	ER
4.95031	7.9424	GOLGI APPARATUS
-2.23946	13.0955	MITOCHONDRIA
8.28709	4.96578	TRANSLATION
10.8594	9.4533	PROTEIN-COMPLEX
2.75641	6.17643	PM
8.13251	9.5744	NUCLEUS
8.36294	5.05039	NUCLEUS
11.4853	12.0165	CYTOPLASM
-2.13288	8.64919	LYSOSOME
-1.15299	8.64489	LYSOSOME
-2.91788	13.0764	MITOCHONDRIA
-1.02392	5.72507	NUCLEUS
2.22003	8.09407	PM
7.9941	5.55126	MITOCHONDRIA
11.8292	11.9711	CYTOPLASM
2.47682	6.68277	PM
10.1299	10.7936	CYTOPLASM
10.55	10.2637	PROTEIN-COMPLEX
10.3456	9.465	CYTOPLASM
9.73355	11.2593	CYTOPLASM
-3.07621	12.5906	MITOCHONDRIA
8.55611	9.41434	CYTOPLASM
8.32603	4.85586	TRANSLATION
8.28727	4.93569	TRANSLATION
10.2452	9.79787	PROTEIN-COMPLEX
2.3085	9.04876	PM
10.5009	9.92124	TRANSLATION
11.9251	10.4608	CYTOPLASM
4.39757	9.187	PM
-1.09492	8.69976	LYSOSOME
-0.193959	4.69445	NUCLEUS
10.2614	9.41447	PROTEIN-COMPLEX
11.7309	10.9243	PROTEIN-COMPLEX
9.88759	9.72355	CYTOPLASM
3.02847	7.94227	PM
10.7461	10.0592	CYTOPLASM
-3.14425	10.7931	MITOCHONDRIA
1.92454	7.62026	ER
10.6698	11.5821	CYTOPLASM
-2.90767	12.4664	MITOCHONDRIA
2.64293	1.31264	NUCLEUS
-0.418249	4.57542	NUCLEUS
6.56828	7.1744	ENDOSOME-VESICLE
10.7169	11.9654	CYTOPLASM
1.40161	7.6612	ER
9.59206	10.2928	CYTOPLASM
5.4204	7.72774	ENDOSOME-VESICLE
-3.15704	12.1763	MITOCHONDRIA
3.06927	5.27807	LD
8.28591	5.37456	TRANSLATION
1.6025	7.75156	ER
8.76109	6.31121	TRANSLATION
7.92157	6.10217	TRANSLATION
2.16704	8.35956	ER
-1.29025	8.81594	LYSOSOME
0.822416	9.32337	MITOCHONDRIA
-3.05115	12.4033	MITOCHONDRIA
2.5944	3.51352	NUCLEUS
10.7431	10.2889	CYTOPLASM
6.80736	8.30601	CYTOPLASM
3.97215	3.32446	CYTOPLASM
11.3146	12.2088	CYTOPLASM
9.92215	9.32621	ENDOSOME-VESICLE
1.52645	8.52029	PM
2.74405	7.41512	PM
1.79324	9.02192	PM
10.0578	9.72595	CYTOPLASM
10.4033	9.22922	PROTEIN-COMPLEX
5.81299	8.55488	NUCLEUS
10.3118	9.29475	GOLGI APPARATUS
1.08788	9.20171	ER
8.92002	10.9823	NUCLEUS
9.1538	6.8175	TRANSLATION
1.21932	9.28942	ER
5.29224	9.72898	PM
1.6234	8.58576	ER
10.3179	9.36498	PROTEIN-COMPLEX
-0.486582	4.85434	NUCLEUS
10.6914	10.0991	MITOCHONDRIA
11.1031	9.85387	PROTEIN-COMPLEX
4.67669	6.18159	GOLGI APPARATUS
1.79644	8.53083	ER
0.269688	8.87147	ER
-2.53194	13.2882	MITOCHONDRIA
-2.42586	13.1085	MITOCHONDRIA
10.7916	10.0199	CYTOPLASM
2.28294	8.34662	ER
1.88521	8.92157	ER
8.54195	6.48589	TRANSLATION
10.6683	8.88454	PROTEIN-COMPLEX
-3.03095	12.6211	MITOCHONDRIA
10.703	11.4802	CYTOPLASM
6.40355	7.70376	GOLGI APPARATUS
10.3613	10.2697	NUCLEUS
1.62821	8.47685	ER
-2.89829	11.3254	MITOCHONDRIA
7.34686	4.9973	PM
11.2758	9.80964	PROTEIN-COMPLEX
0.255657	4.19417	NUCLEUS
4.70086	5.80279	GOLGI APPARATUS
12.176	9.06148	PROTEIN-COMPLEX
1.81038	8.92096	ER
10.2413	9.11693	ENDOSOME-VESICLE
-1.00881	7.2899	NUCLEUS
9.89341	9.62383	CYTOPLASM
-2.14264	12.894	MITOCHONDRIA
10.3409	10.2672	CYTOPLASM
11.7032	8.75397	PROTEIN-COMPLEX
11.1973	10.2942	CYTOPLASM
-2.62646	12.2201	MITOCHONDRIA
10.0161	9.85775	CYTOPLASM
6.99209	7.2798	ENDOSOME-VESICLE
10.4038	9.7817	CYTOPLASM
-2.25311	13.2689	MITOCHONDRIA
2.11006	8.94794	ER
-2.68563	13.3023	MITOCHONDRIA
3.30577	8.46679	PM
1.74277	3.04705	NUCLEUS
4.47712	9.5101	ER
8.24955	11.4832	NUCLEUS
-3.06302	12.3101	MITOCHONDRIA
2.35156	4.17037	MITOCHONDRIA
3.04092	4.81277	LD
1.88352	9.06164	ER
10.5252	9.19168	PROTEIN-COMPLEX
1.97161	7.44769	PM
3.58684	3.42093	NUCLEUS
-2.37078	13.0828	MITOCHONDRIA
12.5719	8.89852	PROTEIN-COMPLEX
10.9206	12.6738	CYTOPLASM
10.0686	10.5409	CYTOPLASM
1.50811	4.34538	NUCLEUS
11.1297	9.47026	PROTEIN-COMPLEX
4.6539	6.17704	GOLGI APPARATUS
4.11167	8.33991	ER
9.2746	10.0733	CYTOPLASM
-2.91286	11.3126	NUCLEUS
1.87245	8.82168	ER
10.4941	9.36408	CYTOPLASM
1.72897	3.97159	NUCLEUS
-2.80266	12.9679	MITOCHONDRIA
-2.71593	11.2679	LD
8.51724	6.80733	TRANSLATION
-0.587234	11.0768	MITOCHONDRIA
11.9301	12.2305	CYTOPLASM
1.74585	8.57466	ER
6.44877	8.45546	PROTEIN-COMPLEX
11.9939	10.2763	PROTEIN-COMPLEX
-3.10153	12.6339	MITOCHONDRIA
11.8122	12.2119	CYTOPLASM
10.4212	9.4074	ENDOSOME-VESICLE
6.95332	7.53275	ENDOSOME-VESICLE
9.66372	9.74492	NUCLEUS
3.65149	8.38165	PM
8.92545	10.7997	MITOCHONDRIA
1.81145	4.0904	NUCLEUS
12.1826	8.92937	PROTEIN-COMPLEX
8.98689	6.36336	NUCLEUS
-3.16887	12.2215	MITOCHONDRIA
1.27407	8.05606	ER
-1.18968	12.2352	MITOCHONDRIA
-2.89124	12.7789	MITOCHONDRIA
2.0485	7.57566	ER
10.6751	12.6374	CYTOPLASM
11.9142	12.3001	CYTOPLASM
11.7749	12.0612	CYTOPLASM
11.4257	12.0385	CYTOPLASM
3.87221	5.93879	ENDOSOME-VESICLE
11.4855	12.5332	CYTOPLASM
-2.86314	12.4771	MITOCHONDRIA
-0.342793	4.13918	NUCLEUS
2.77326	5.6096	LD
7.99389	5.48826	NUCLEUS
10.1454	9.72037	CYTOPLASM
8.20408	5.32213	TRANSLATION
-2.60184	13.2488	MITOCHONDRIA
11.7903	12.2025	CYTOPLASM
-2.92404	12.2488	MITOCHONDRIA
6.25073	10.4818	NUCLEUS
-3.27036	11.1781	MITOCHONDRIA
-0.575156	6.77607	NUCLEUS
7.97973	9.11179	ENDOSOME-VESICLE
-2.78733	13.1257	MITOCHONDRIA
-2.84638	13.0575	MITOCHONDRIA
10.1483	9.91152	PROTEIN-COMPLEX
11.3693	12.4198	CYTOPLASM
-2.87808	12.6523	MITOCHONDRIA
11.5687	12.2841	CYTOPLASM
10.4749	12.68	CYTOPLASM
5.01119	5.8161	GOLGI APPARATUS
11.814	12.3264	CYTOPLASM
1.63138	4.16461	NUCLEUS
12.0115	9.17823	PROTEIN-COMPLEX
-2.77348	13.1972	MITOCHONDRIA
10.5583	9.21673	CYTOPLASM
8.2593	5.34462	TRANSLATION
10.4911	11.1527	CYTOPLASM
3.70005	8.12272	NUCLEUS
-1.80415	12.7386	MITOCHONDRIA
10.8288	11.6961	CYTOPLASM
-2.97373	12.5194	MITOCHONDRIA
0.744646	3.75431	CYTOPLASM
5.82168	6.72811	GOLGI APPARATUS
10.4461	9.97303	CYTOPLASM
8.5881	6.47404	ENDOSOME-VESICLE
10.9552	10.4724	PROTEIN-COMPLEX
-2.41587	13.2896	MITOCHONDRIA
1.68141	3.3453	NUCLEUS
11.3182	10.2164	PROTEIN-COMPLEX
11.0021	12.5556	CYTOPLASM
-0.644184	10.4115	MITOCHONDRIA
-3.04561	12.4559	MITOCHONDRIA
9.62629	8.81287	NUCLEUS
-2.36349	13.2447	MITOCHONDRIA
11.6865	7.76725	CYTOPLASM
-0.204779	10.9825	MITOCHONDRIA
10.4325	10.2637	CYTOPLASM
1.73198	9.31069	ER
8.32657	4.98182	NUCLEUS
-0.333944	7.46687	NUCLEUS
8.34983	4.87562	TRANSLATION
4.41081	9.17384	PM
4.69339	6.03075	GOLGI APPARATUS
10.1924	9.91946	CYTOPLASM
4.97932	5.81616	PM
8.64765	6.31931	NUCLEUS
11.7205	10.7348	PROTEIN-COMPLEX
8.18481	5.33903	TRANSLATION
8.14906	5.28541	TRANSLATION
-0.610854	9.07774	LYSOSOME
-3.29422	11.3655	MITOCHONDRIA
-1.53539	9.45445	PEROXISOME
2.80586	1.7917	LD
2.46304	3.32689	MITOCHONDRIA
-2.88423	11.9296	MITOCHONDRIA
-0.864086	10.1324	LYSOSOME
8.74297	9.73409	CYTOPLASM
10.1534	8.88047	ENDOSOME-VESICLE
10.1735	8.90919	ENDOSOME-VESICLE
-0.826451	5.56306	TRANSLATION
6.85918	7.01179	GOLGI APPARATUS
-3.27025	10.925	MITOCHONDRIA
10.1771	9.95043	CYTOPLASM
0.406468	8.86851	ER
1.1287	8.74229	ER
9.40017	11.1252	CYTOPLASM
-2.31821	13.1321	MITOCHONDRIA
10.3594	11.1144	CYTOPLASM
9.95057	9.60972	CYTOPLASM
11.6618	9.62811	CYTOPLASM
11.4101	10.446	PROTEIN-COMPLEX
-1.25608	8.6734	LYSOSOME
11.6427	11.7676	CYTOPLASM
6.92753	6.91193	GOLGI APPARATUS
-2.61504	11.3977	MITOCHONDRIA
4.85055	6.29048	GOLGI APPARATUS
11.263	11.9558	PROTEIN-COMPLEX
-2.967	12.943	MITOCHONDRIA
1.77348	8.68132	ER
7.9573	5.88696	TRANSLATION
5.57571	7.73542	GOLGI APPARATUS
10.3356	9.59562	PROTEIN-COMPLEX
2.61638	7.49805	PM
-3.19252	10.815	MITOCHONDRIA
10.9009	11.7	CYTOPLASM
-3.11269	12.0987	MITOCHONDRIA
1.93723	6.85725	ER
3.33179	8.13065	PM
10.4443	9.74871	CYTOPLASM
3.47663	8.55058	TRANSLATION
2.76223	8.58171	ER
10.9069	12.7337	CYTOPLASM
1.52869	5.2684	NUCLEUS
11.1462	12.3211	NUCLEUS
-2.99609	12.4525	MITOCHONDRIA
12.6802	8.2593	PROTEIN-COMPLEX
7.79139	6.36855	TRANSLATION
6.8689	8.3449	NUCLEUS
11.1285	9.83739	CYTOPLASM
-1.13796	7.25249	NUCLEUS
-3.19958	11.2476	MITOCHONDRIA
4.6935	6.12665	GOLGI APPARATUS
-2.72927	13.1364	MITOCHONDRIA
10.6389	11.2742	CYTOPLASM
-1.4317	9.42568	MITOCHONDRIA
2.01409	6.85689	PM
9.37785	9.94287	NUCLEUS
10.3563	10.8177	PROTEIN-COMPLEX
8.33201	4.90752	TRANSLATION
8.35504	4.89521	TRANSLATION
10.5312	11.094	CYTOPLASM
11.7018	7.81895	NUCLEUS
2.60689	6.4329	ER
1.66342	3.14424	NUCLEUS
10.5787	10.0102	CYTOPLASM
-2.75235	13.0582	MITOCHONDRIA
11.7994	11.4644	PROTEIN-COMPLEX
3.08529	7.69784	PM
-2.01251	12.8702	MITOCHONDRIA
11.1616	11.6506	CYTOPLASM
0.580611	9.04955	LYSOSOME
8.77088	5.81426	TRANSLATION
10.9233	9.59789	NUCLEUS
11.3896	12.2706	CYTOPLASM
1.55943	8.50013	ER
8.34294	4.84487	TRANSLATION
-3.05499	12.439	MITOCHONDRIA
10.1669	9.71951	CYTOPLASM
-2.89852	12.8293	MITOCHONDRIA
-0.999097	12.0974	MITOCHONDRIA
8.93224	9.31284	PROTEIN-COMPLEX
7.04904	7.16959	TRANSLATION
2.91107	7.80926	PM
8.23387	9.56918	ENDOSOME-VESICLE
4.24159	9.38578	ER
6.3187	7.12248	ENDOSOME-VESICLE
10.9819	10.6254	PROTEIN-COMPLEX
-2.78213	10.3155	PEROXISOME
8.84134	6.07285	TRANSLATION
10.6515	11.4617	CYTOPLASM
10.4083	9.4086	ENDOSOME-VESICLE
10.3773	11.1608	CYTOPLASM
-2.69597	12.2993	MITOCHONDRIA
11.2603	11.973	CYTOPLASM
11.6443	12.3038	CYTOPLASM
12.4788	9.10378	PROTEIN-COMPLEX
5.40583	6.05971	GOLGI APPARATUS
1.66272	9.19594	PM
11.2092	12.2506	CYTOPLASM
-1.88036	8.39527	NUCLEUS
8.67415	6.23838	ENDOSOME-VESICLE
9.72593	10.2895	CYTOPLASM
8.31523	5.20446	TRANSLATION
-0.595777	4.71056	TRANSLATION
-2.97556	12.4733	MITOCHONDRIA
8.5942	9.11774	ENDOSOME-VESICLE
2.11822	9.13513	ER
-3.16817	11.489	MITOCHONDRIA
11.1302	11.8385	CYTOPLASM
10.439	10.1435	CYTOPLASM
9.33325	7.12784	NUCLEUS
8.26763	5.34896	TRANSLATION
8.05068	9.93866	NUCLEUS
10.4618	12.6146	CYTOPLASM
2.20887	3.90447	NUCLEUS
11.3773	12.1594	CYTOPLASM
1.9316	3.32968	NUCLEUS
0.879638	9.08464	ER
12.7015	8.63223	PROTEIN-COMPLEX
3.7492	9.20236	ER
-2.6601	11.9656	MITOCHONDRIA
1.64633	8.03063	NUCLEUS
10.4987	9.7249	CYTOPLASM
10.412	10.6248	CYTOPLASM
-2.90744	12.0676	MITOCHONDRIA
-2.92145	12.7374	MITOCHONDRIA
-0.641796	11.0199	MITOCHONDRIA
1.82344	7.26636	ER
2.01684	8.55215	ER
8.17384	5.11605	NUCLEUS
4.11648	9.25021	PM
8.24868	5.26881	TRANSLATION
5.47282	7.53431	GOLGI APPARATUS
9.00809	6.87372	NUCLEUS
-3.27291	11.4808	MITOCHONDRIA
8.30511	11.7677	CYTOPLASM
-2.25198	13.2775	MITOCHONDRIA
9.10735	8.97191	TRANSLATION
-2.38747	13.2039	MITOCHONDRIA
1.85688	7.29046	ER
11.0524	8.74239	ENDOSOME-VESICLE
11.0397	8.71793	ENDOSOME-VESICLE
-2.43064	12.7395	MITOCHONDRIA
-2.12787	13.2255	MITOCHONDRIA
10.8637	12.6893	CYTOPLASM
10.3776	9.81208	CYTOPLASM
6.99547	8.17012	ENDOSOME-VESICLE
1.96915	8.62474	MITOCHONDRIA
2.03837	6.87337	ER
8.36833	4.84881	TRANSLATION
8.38648	4.774	TRANSLATION
11.9993	11.6559	CYTOPLASM
-2.79365	13.0353	MITOCHONDRIA
-0.6659	8.99656	LYSOSOME
9.05728	10.8859	MITOCHONDRIA
2.81094	3.32105	LD
12.7107	8.78092	PROTEIN-COMPLEX
2.44417	9.07724	PM
-0.294028	4.96875	NUCLEUS
0.477933	8.88159	ER
5.46998	6.66232	GOLGI APPARATUS
5.44928	6.73139	GOLGI APPARATUS
5.70438	7.37863	ENDOSOME-VESICLE
8.67223	7.40808	TRANSLATION
1.65662	8.90178	ER
4.8712	6.27599	GOLGI APPARATUS
3.05756	8.79559	ER
12.9515	8.20969	CYTOPLASM
9.05787	10.8906	CYTOPLASM
8.28085	4.93852	TRANSLATION
8.34109	4.77447	TRANSLATION
-1.27888	8.8207	LYSOSOME
-3.1644	12.0269	MITOCHONDRIA
10.3489	10.3678	CYTOPLASM
1.92535	9.12602	ER
10.7168	11.3344	CYTOPLASM
11.6431	10.0906	CYTOPLASM
12.4419	8.44934	PROTEIN-COMPLEX
-1.74498	10.6187	MITOCHONDRIA
4.70616	8.14733	ENDOSOME-VESICLE
10.1493	10.1684	ENDOSOME-VESICLE
1.90998	9.12084	ER
-3.37308	11.2013	MITOCHONDRIA
7.13359	6.98924	ENDOSOME-VESICLE
7.06953	6.98333	ENDOSOME-VESICLE
11.3763	12.2713	CYTOPLASM
9.94746	9.17677	ENDOSOME-VESICLE
11.6194	12.3765	CYTOPLASM
-0.269156	9.22159	ER
5.28634	9.75375	GOLGI APPARATUS
1.23838	8.61747	ER
4.86426	6.07384	GOLGI APPARATUS
8.37267	5.49005	NUCLEUS
-2.52654	13.1418	MITOCHONDRIA
-2.17628	13.293	MITOCHONDRIA
10.4939	10.0727	CYTOPLASM
1.65463	9.34252	LYSOSOME
6.97443	6.95369	GOLGI APPARATUS
1.2189	8.52802	ER
8.72521	6.30349	TRANSLATION
11.0093	10.0374	PROTEIN-COMPLEX
-2.69823	13.2124	MITOCHONDRIA
5.05648	7.83722	PM
11.6591	11.7452	GOLGI APPARATUS
13.1636	8.17138	PROTEIN-COMPLEX
11.1632	12.5925	CYTOPLASM
12.3572	9.23828	PROTEIN-COMPLEX
9.78451	5.55091	MITOCHONDRIA
1.89556	8.82719	ER
-2.97326	12.7205	MITOCHONDRIA
2.48366	6.37775	LD
10.7097	11.3971	CYTOPLASM
0.993822	9.06754	ER
3.64586	9.31693	ER
10.4969	9.60693	PROTEIN-COMPLEX
10.4518	9.47854	CYTOPLASM
-3.20368	12.1547	MITOCHONDRIA
1.752	7.95587	ER
8.05924	5.29747	TRANSLATION
10.6335	12.8279	CYTOPLASM
9.64018	8.71448	NUCLEUS
3.57351	3.02945	NUCLEUS
1.93951	4.04228	NUCLEUS
-2.77241	13.1444	MITOCHONDRIA
2.32543	4.44705	NUCLEUS
8.47861	7.33455	ENDOSOME-VESICLE
9.51378	8.55122	NUCLEUS
-3.17942	11.9848	MITOCHONDRIA
-0.191615	8.27785	LYSOSOME
10.4964	10.6505	CYTOPLASM
7.11294	6.93958	ENDOSOME-VESICLE
11.5133	11.6465	CYTOPLASM
-3.28313	11.0491	MITOCHONDRIA
10.3386	9.86435	CYTOPLASM
-3.13839	12.0719	MITOCHONDRIA
-3.15002	11.1263	MITOCHONDRIA
8.37179	4.78649	TRANSLATION
8.0665	5.27918	TRANSLATION
1.04179	9.12151	ER
10.9267	11.7246	CYTOPLASM
12.1717	8.64293	CYTOPLASM
-1.50102	13.2604	CYTOPLASM
10.6216	11.4419	CYTOPLASM
8.36297	4.81519	TRANSLATION
8.05719	6.90637	TRANSLATION
2.2588	7.50489	ER
-2.94247	11.9981	MITOCHONDRIA
2.32633	7.51509	ER
-3.2789	10.9065	MITOCHONDRIA
-2.74556	13.0902	MITOCHONDRIA
2.8412	7.66282	PM
8.29902	4.93355	TRANSLATION
1.31982	4.89079	CYTOPLASM
10.0439	9.77953	CYTOPLASM
7.1184	6.97381	ENDOSOME-VESICLE
8.35732	5.19712	TRANSLATION
12.6425	8.30936	GOLGI APPARATUS
-2.43672	12.3755	MITOCHONDRIA
1.23203	8.61271	ER
-1.0296	8.95036	LYSOSOME
-1.94103	10.2806	PEROXISOME
-3.09808	12.362	MITOCHONDRIA
6.00381	8.55581	NUCLEUS
10.5436	9.90476	CYTOPLASM
4.61388	9.3715	PM
-2.93668	12.9811	MITOCHONDRIA
11.1894	12.2373	CYTOPLASM
10.1357	8.90485	CYTOPLASM
2.73955	7.32521	PM
10.1903	9.10108	PROTEIN-COMPLEX
7.84379	9.59455	PM
-3.33652	11.5089	MITOCHONDRIA
12.717	8.30482	PROTEIN-COMPLEX
13.1043	8.26299	PROTEIN-COMPLEX
1.84764	9.20373	ER
11.4847	12.3502	CYTOPLASM
11.2133	11.961	CYTOPLASM
8.55062	6.82644	TRANSLATION
-2.78427	13.029	MITOCHONDRIA
11.8421	10.2888	PROTEIN-COMPLEX
3.07598	8.31328	ER
10.1018	10.5562	CYTOPLASM
-3.30288	10.9438	MITOCHONDRIA
10.1654	10.8905	CYTOPLASM
4.06462	8.93289	PM
4.57825	6.23064	GOLGI APPARATUS
1.64858	7.43944	ER
12.96	8.0649	PROTEIN-COMPLEX
11.6711	12.3646	CYTOPLASM
9.69832	10.2726	CYTOPLASM
1.7578	3.49103	NUCLEUS
0.97251	9.15004	ER
-1.28313	8.67829	LYSOSOME
12.6059	8.96677	PROTEIN-COMPLEX
2.13388	9.02192	ER
1.89797	7.67397	PM
-1.20602	9.50965	PM
12.198	9.54017	PROTEIN-COMPLEX
11.2339	12.5941	CYTOPLASM
-2.88167	12.4151	MITOCHONDRIA
10.5652	11.4527	CYTOPLASM
10.1563	9.10781	PROTEIN-COMPLEX
1.59176	3.22742	NUCLEUS
4.50872	9.45315	LD
2.47275	6.57827	LD
7.09824	6.94487	ENDOSOME-VESICLE
2.35369	8.47971	ER
1.70957	8.0934	ER
-0.542734	10.7659	PEROXISOME
11.5691	11.1734	CYTOPLASM
-1.50162	7.36163	NUCLEUS
-0.368617	8.97454	NUCLEUS
12.5406	9.01801	PROTEIN-COMPLEX
12.299	8.74443	PROTEIN-COMPLEX
7.18727	6.9315	ENDOSOME-VESICLE
-1.97419	10.1777	PEROXISOME
3.11739	8.52424	MITOCHONDRIA
-2.89283	12.7503	MITOCHONDRIA
-2.90323	12.1304	MITOCHONDRIA
10.3272	11.5833	CYTOPLASM
8.10958	9.4499	ENDOSOME-VESICLE
1.89466	8.8003	ER
3.6678	2.96252	NUCLEUS
10.8976	10.2102	PROTEIN-COMPLEX
2.51268	6.60504	PM
1.50587	3.62447	NUCLEUS
10.7857	9.51883	NUCLEUS
12.3754	8.94297	PROTEIN-COMPLEX
5.90706	10.4594	MITOCHONDRIA
1.0837	9.19792	ER
1.92438	8.86772	ER
2.54368	9.57707	ER
7.03506	6.82157	ENDOSOME-VESICLE
10.1197	9.0381	ENDOSOME-VESICLE
1.93471	8.80512	ER
1.63504	3.31125	NUCLEUS
-2.30764	10.8441	MITOCHONDRIA
8.04531	6.15961	NUCLEUS
2.35464	4.16551	MITOCHONDRIA
-2.12387	10.2662	PEROXISOME
5.46145	7.5127	GOLGI APPARATUS
2.81035	7.49696	ER
2.26647	7.73977	ER
10.3905	9.4587	CYTOPLASM
5.38985	7.88202	ENDOSOME-VESICLE
-2.36129	10.2628	ER
9.84881	9.76684	CYTOPLASM
11.9595	11.7619	CYTOPLASM
9.80669	9.46593	NUCLEUS
3.84711	9.03169	PM
8.86237	6.24834	NUCLEUS
1.51085	7.94249	LD
1.66448	5.65423	NUCLEUS
-2.94512	12.3666	MITOCHONDRIA
12.3763	8.53648	PROTEIN-COMPLEX
13.0898	8.2563	PROTEIN-COMPLEX
0.469886	8.72883	NUCLEUS
1.71937	8.12072	ER
1.34329	4.00642	NUCLEUS
2.23374	5.22389	TRANSLATION
10.0796	9.76047	CYTOPLASM
2.78604	7.41328	PM
8.65398	9.83642	CYTOPLASM
10.1086	9.76779	CYTOPLASM
8.55273	11.7628	CYTOPLASM
12.6894	8.50909	PROTEIN-COMPLEX
0.987142	8.65854	ER
-3.139	12.0247	MITOCHONDRIA
2.87818	5.22124	PM
6.01427	8.55577	CYTOPLASM
0.482129	8.69801	LYSOSOME
10.646	9.47963	CYTOPLASM
-3.27094	11.8226	MITOCHONDRIA
10.2174	10.429	CYTOPLASM
-1.10379	7.2711	NUCLEUS
3.33453	8.9708	MITOCHONDRIA
-3.19467	11.1848	MITOCHONDRIA
9.88316	9.52146	NUCLEUS
11.5878	10.1454	PROTEIN-COMPLEX
10.2706	8.97177	ENDOSOME-VESICLE
6.94536	6.94958	ENDOSOME-VESICLE
-3.05758	12.3772	MITOCHONDRIA
11.1477	10.4436	CYTOPLASM
2.83214	5.24819	PM
4.35665	9.29381	PM
5.92443	10.4566	MITOCHONDRIA
9.21094	6.29773	NUCLEUS
-3.20369	11.8713	MITOCHONDRIA
-3.07547	12.47	MITOCHONDRIA
5.81602	7.31221	ENDOSOME-VESICLE
11.4969	8.61776	CYTOPLASM
-3.06458	12.6509	MITOCHONDRIA
2.75115	1.59882	LD
12.4296	9.23335	PROTEIN-COMPLEX
1.06504	3.87019	NUCLEUS
10.1672	9.93382	CYTOPLASM
2.64146	1.30518	NUCLEUS
1.46359	3.92369	NUCLEUS
-2.77862	13.1164	MITOCHONDRIA
1.42522	3.75105	NUCLEUS
0.340661	3.77784	NUCLEUS
10.4463	9.54145	CYTOPLASM
1.68691	9.01258	ER
7.52405	9.63715	PM
10.0546	8.77002	CYTOPLASM
10.3265	9.09837	GOLGI APPARATUS
6.71241	7.57878	GOLGI APPARATUS
6.66803	7.56424	ENDOSOME-VESICLE
4.78913	6.05762	GOLGI APPARATUS
2.94665	4.86317	LD
10.5053	10.9836	ENDOSOME-VESICLE
10.2786	9.65414	CYTOPLASM
6.11458	5.78563	GOLGI APPARATUS
-1.60861	9.93056	ER
3.20588	7.93632	PM
11.1928	12.4894	CYTOPLASM
9.46068	9.22622	ENDOSOME-VESICLE
-1.47013	11.4688	MITOCHONDRIA
1.56813	3.68538	NUCLEUS
11.1625	11.1426	PROTEIN-COMPLEX
11.8733	12.2874	CYTOPLASM
1.64234	3.29048	NUCLEUS
2.59356	6.34934	PM
2.66971	2.41364	GOLGI APPARATUS
2.53276	9.46442	PM
2.80459	8.583	PM
5.27398	7.86346	ENDOSOME-VESICLE
10.1743	9.58757	CYTOPLASM
10.3733	10.5194	CYTOPLASM
10.276	11.949	CYTOPLASM
11.6996	12.3528	CYTOPLASM
11.5475	10.3508	CYTOPLASM
-2.76119	13.1717	MITOCHONDRIA
-3.22745	11.8788	MITOCHONDRIA
-3.05315	12.0474	MITOCHONDRIA
10.3134	10.7684	CYTOPLASM
4.70478	6.47677	GOLGI APPARATUS
0.988977	8.89087	ER
10.8396	12.6242	CYTOPLASM
6.61844	7.02943	GOLGI APPARATUS
6.56909	7.02406	ENDOSOME-VESICLE
-2.74824	13.1647	MITOCHONDRIA
-1.65528	10.0377	PEROXISOME
3.43185	3.16162	NUCLEUS
-2.99238	12.834	MITOCHONDRIA
-2.73231	13.0501	MITOCHONDRIA
-1.39586	8.32668	ER
0.736251	5.46589	NUCLEUS
-1.44069	13.1998	NUCLEUS
1.35853	4.37074	NUCLEUS
10.5324	9.87476	CYTOPLASM
2.70605	6.98649	PM
8.27632	5.03241	TRANSLATION
-2.47506	13.2949	MITOCHONDRIA
1.72777	4.11209	NUCLEUS
12.0217	11.7056	CYTOPLASM
9.64452	9.50422	NUCLEUS
-1.34858	9.8054	ER
-2.08505	11.5416	MITOCHONDRIA
10.4036	9.41569	CYTOPLASM
8.6103	6.84481	TRANSLATION
11.2206	12.3014	CYTOPLASM
11.2402	11.4488	CYTOPLASM
6.01951	10.465	ER
11.6289	12.2877	CYTOPLASM
-3.08929	12.324	MITOCHONDRIA
0.974355	8.89487	PM
8.21912	9.69764	ENDOSOME-VESICLE
11.7864	9.99673	CYTOPLASM
0.855987	8.59933	ER
0.292891	3.74264	NUCLEUS
1.87828	8.67333	ER
8.14088	10.0708	NUCLEUS
12.1997	9.66597	PROTEIN-COMPLEX
-2.92231	12.8206	MITOCHONDRIA
10.0923	9.57845	CYTOPLASM
9.38491	7.16914	MITOCHONDRIA
1.86904	8.70285	ER
11.3868	12.3711	CYTOPLASM
4.675	6.17822	GOLGI APPARATUS
3.64119	5.52655	NUCLEUS
-2.91396	12.7985	MITOCHONDRIA
10.4064	11.2345	CYTOPLASM
2.99002	9.71368	ER
2.10964	7.42522	ER
-1.27478	7.25359	NUCLEUS
11.4516	12.3606	CYTOPLASM
1.26206	8.59217	ER
1.37758	3.93677	NUCLEUS
-0.0181465	5.5844	NUCLEUS
3.03679	8.55292	ER
-3.02821	11.528	MITOCHONDRIA
10.0859	9.07541	ENDOSOME-VESICLE
11.8922	12.024	CYTOPLASM
10.2965	10.5089	CYTOPLASM
1.57237	3.8555	NUCLEUS
-3.25707	11.5892	MITOCHONDRIA
4.44666	6.14719	GOLGI APPARATUS
-2.86439	12.8512	MITOCHONDRIA
-3.32391	11.3425	MITOCHONDRIA
2.33603	9.05861	ER
-2.51364	13.3364	MITOCHONDRIA
0.941663	9.11739	ER
7.46426	8.0166	ENDOSOME-VESICLE
1.79199	9.22042	ER
3.0285	8.09504	PM
0.5497	8.99125	ER
10.5024	9.31036	CYTOPLASM
-3.31702	11.3765	MITOCHONDRIA
10.4937	9.57005	PROTEIN-COMPLEX
10.2341	10.4907	CYTOPLASM
10.338	10.293	CYTOPLASM
11.3073	9.36673	PROTEIN-COMPLEX
1.68691	3.00177	NUCLEUS
1.69905	8.16089	ER
10.2084	9.19961	ENDOSOME-VESICLE
5.93966	5.53957	ENDOSOME-VESICLE
-2.9523	12.4874	MITOCHONDRIA
-3.17303	10.9503	MITOCHONDRIA
2.17531	7.54682	ER
-0.633319	4.83603	NUCLEUS
4.36911	9.2911	CYTOPLASM
1.42921	3.3093	NUCLEUS
10.4119	10.9711	CYTOPLASM
11.3151	11.9252	CYTOPLASM
2.78421	3.6597	LD
10.3223	9.81952	CYTOPLASM
11.8108	12.2645	CYTOPLASM
-3.05051	11.7004	MITOCHONDRIA
1.72922	9.12312	PM
0.902463	9.10638	ER
-3.08432	12.0492	MITOCHONDRIA
10.2394	5.70145	PROTEIN-COMPLEX
8.58292	5.70792	PM
11.1305	11.9311	CYTOPLASM
-2.95046	12.8929	MITOCHONDRIA
1.74504	8.4894	ER
10.6646	11.1493	CYTOPLASM
-3.10969	11.9288	MITOCHONDRIA
-2.68446	10.1749	PEROXISOME
11.7711	9.64628	NUCLEUS
-2.79875	12.6144	MITOCHONDRIA
1.6917	9.30156	ER
10.4799	10.0714	CYTOPLASM
10.8861	9.84492	CYTOPLASM
-2.71572	13.2817	MITOCHONDRIA
1.51819	7.89078	ER
9.31955	11.3425	CYTOPLASM
-3.14174	12.2183	MITOCHONDRIA
-3.04316	12.7229	MITOCHONDRIA
-3.25138	11.7217	MITOCHONDRIA
11.322	12.2113	CYTOPLASM
10.5702	10.0718	CYTOPLASM
12.0087	11.9874	CYTOPLASM
-2.68629	13.1485	MITOCHONDRIA
2.94054	7.65366	PM
11.1378	12.016	CYTOPLASM
10.8593	9.88206	CYTOPLASM
1.62462	7.48232	PM
2.22833	7.40055	PM
3.61652	8.59672	PM
11.9134	11.9479	CYTOPLASM
-0.882661	7.20269	NUCLEUS
6.95461	7.03483	ENDOSOME-VESICLE
-3.23512	11.7939	MITOCHONDRIA
1.78537	8.93218	ER
8.58142	10.4792	PEROXISOME
10.1583	9.68339	CYTOPLASM
-1.32321	7.69166	LYSOSOME
11.0246	11.7624	CYTOPLASM
10.3716	12.642	CYTOPLASM
11.1866	12.0781	CYTOPLASM
-2.64318	12.9286	MITOCHONDRIA
-3.16296	12.1491	MITOCHONDRIA
10.44	10.4777	CYTOPLASM
11.0165	11.99	CYTOPLASM
10.8976	9.8569	CYTOPLASM
11.6653	12.3459	CYTOPLASM
1.31619	8.58512	ER
1.24815	8.62601	ER
3.71445	8.9287	PM
2.32372	7.28169	PM
3.09757	8.31808	GOLGI APPARATUS
-2.97652	12.8178	MITOCHONDRIA
-1.9305	12.9569	MITOCHONDRIA
-2.87751	12.6747	MITOCHONDRIA
-2.69853	13.1816	MITOCHONDRIA
2.24891	7.45808	PM
7.88702	6.07313	TRANSLATION
8.90395	6.36381	NUCLEUS
8.47466	4.7357	TRANSLATION
8.48782	4.74881	TRANSLATION
8.27303	4.9374	TRANSLATION
2.36582	8.00141	ER
4.41244	9.33119	PM
2.79926	5.94888	ENDOSOME-VESICLE
3.94018	8.85432	PM
-3.15964	12.0754	MITOCHONDRIA
11.9248	12.1781	CYTOPLASM
8.5393	7.94417	TRANSLATION
10.9012	12.7164	CYTOPLASM
10.9543	9.79471	CYTOPLASM
-0.902934	7.25008	NUCLEUS
11.9842	11.6936	PM
2.15708	9.08215	ER
0.969554	8.69518	ER
0.182084	4.63068	NUCLEUS
10.5729	9.75137	CYTOPLASM
3.52003	8.45783	LYSOSOME
1.3009	9.22138	LYSOSOME
-1.32144	8.67664	LYSOSOME
-0.697622	8.98697	LYSOSOME
10.2693	10.5512	CYTOPLASM
10.5508	10.9544	CYTOPLASM
-1.03883	8.82841	LYSOSOME
10.7101	9.96003	CYTOPLASM
10.9723	12.4587	CYTOPLASM
-2.56155	13.2995	MITOCHONDRIA
-2.6925	13.1236	MITOCHONDRIA
10.4895	10.0195	CYTOPLASM
-1.41094	8.82724	LYSOSOME
12.4847	9.25669	PROTEIN-COMPLEX
10.58	9.65338	CYTOPLASM
10.1268	9.7104	CYTOPLASM
11.918	11.2476	CYTOPLASM
-2.74143	13.2914	MITOCHONDRIA
-2.43574	13.0617	MITOCHONDRIA
9.9196	10.5712	NUCLEUS
10.5286	11.7846	CYTOPLASM
-1.76906	10.1893	PEROXISOME
11.3376	12.3841	CYTOPLASM
11.4223	12.1734	CYTOPLASM
3.21973	8.30169	PM
11.2721	12.0968	CYTOPLASM
10.3454	10.3683	CYTOPLASM
2.21037	9.26117	ER
1.38627	8.64228	PM
7.81636	9.53885	NUCLEUS
2.04379	3.88545	NUCLEUS
10.1118	9.66759	CYTOPLASM
11.604	12.1257	CYTOPLASM
5.47913	7.5854	GOLGI APPARATUS
10.4152	9.9446	CYTOPLASM
5.14421	5.38921	GOLGI APPARATUS
1.67177	9.12518	ER
10.8211	12.6582	CYTOPLASM
-2.71802	13.2642	MITOCHONDRIA
-1.10582	8.82987	LYSOSOME
4.05334	8.88671	PM
1.53489	3.66823	NUCLEUS
1.37797	9.39452	MITOCHONDRIA
-3.06868	12.5175	MITOCHONDRIA
4.50883	8.29724	GOLGI APPARATUS
10.5385	12.6232	CYTOPLASM
-3.23815	10.8828	MITOCHONDRIA
-1.32018	8.71016	LYSOSOME
11.6579	12.0195	CYTOPLASM
-2.79239	13.1131	MITOCHONDRIA
1.02421	8.86559	ER
4.16643	9.267	ER
-2.55811	13.3505	MITOCHONDRIA
-2.72137	13.0806	MITOCHONDRIA
10.8422	9.57696	PROTEIN-COMPLEX
2.75657	7.31066	PM
3.14718	7.65937	PM
9.41061	10.0674	CYTOPLASM
1.70725	9.17896	PM
10.6521	9.69193	CYTOPLASM
12.0496	11.8876	CYTOPLASM
-2.73597	13.1851	MITOCHONDRIA
9.93835	9.95721	CYTOPLASM
-3.30748	11.0608	MITOCHONDRIA
1.29913	7.84068	PM
1.02213	8.07303	PM
-0.828361	7.33966	PM
-2.55767	11.437	MITOCHONDRIA
11.8401	11.0637	CYTOPLASM
1.59243	4.31697	PROTEIN-COMPLEX
11.8927	12.1912	CYTOPLASM
-2.59646	13.2413	MITOCHONDRIA
-2.95795	12.8258	MITOCHONDRIA
8.3976	6.28664	TRANSLATION
8.34835	6.28357	TRANSLATION
-2.86062	12.8578	MITOCHONDRIA
-2.91909	12.5122	MITOCHONDRIA
5.95025	10.4644	MITOCHONDRIA
-1.00585	8.95323	LYSOSOME
-0.347864	8.78185	LYSOSOME
10.4008	10.7401	CYTOPLASM
8.01039	6.18036	TRANSLATION
0.969954	9.00826	ER
-0.51165	9.11139	ER
-0.0259045	9.12083	ER
11.5158	10.6832	PROTEIN-COMPLEX
-2.83569	13.1621	MITOCHONDRIA
0.88056	8.55075	NUCLEUS
10.5561	11.4303	CYTOPLASM
10.4732	10.0756	CYTOPLASM
3.31825	8.11132	PM
10.5019	11.0983	CYTOPLASM
10.682	9.78944	CYTOPLASM
1.33725	7.93911	ER
7.15944	6.8881	ENDOSOME-VESICLE
1.45427	5.24562	NUCLEUS
-3.18282	12.147	MITOCHONDRIA
10.3764	10.3498	CYTOPLASM
1.50388	8.54869	PM
10.3056	10.3138	CYTOPLASM
4.52045	6.21367	GOLGI APPARATUS
11.6135	12.4047	CYTOPLASM
10.3708	9.96334	CYTOPLASM
-1.03891	8.84546	LYSOSOME
-1.16629	8.66449	LYSOSOME
8.21811	5.0698	TRANSLATION
2.57348	7.75706	PM
2.5077	6.4905	PM
11.2182	11.9345	CYTOPLASM
-2.64616	13.1126	MITOCHONDRIA
-1.518	8.84918	LYSOSOME
10.1316	11.3908	CYTOPLASM
10.4377	11.1311	CYTOPLASM
1.20397	3.90727	NUCLEUS
1.9243	8.86645	ER
2.26362	8.08067	ER
3.43933	8.43212	GOLGI APPARATUS
10.6635	12.6668	CYTOPLASM
11.0959	12.5499	CYTOPLASM
-1.1989	8.79991	LYSOSOME
-3.02665	12.1489	MITOCHONDRIA
10.415	10.9261	CYTOPLASM
2.90099	8.41948	PM
-2.5198	13.2376	MITOCHONDRIA
-3.35826	11.2226	MITOCHONDRIA
10.5856	9.77255	CYTOPLASM
10.4024	9.61152	CYTOPLASM
2.83909	5.02571	NUCLEUS
1.38378	8.0223	ER
10.0195	9.74977	CYTOPLASM
1.08254	5.57986	NUCLEUS
12.476	9.18499	PROTEIN-COMPLEX
11.3046	12.4198	CYTOPLASM
12.7362	8.88213	PROTEIN-COMPLEX
1.8022	9.0615	ER
5.45387	7.38674	NUCLEUS
8.15044	5.31705	TRANSLATION
3.29197	9.6965	PM
8.24224	5.02999	TRANSLATION
2.42872	7.74009	PM
-1.59735	8.80106	NUCLEUS
2.39946	4.0757	MITOCHONDRIA
6.9564	6.89018	GOLGI APPARATUS
5.7782	6.71024	GOLGI APPARATUS
-0.826319	11.209	MITOCHONDRIA
3.26328	8.70559	GOLGI APPARATUS
8.22756	5.02639	TRANSLATION
12.0077	11.6831	CYTOPLASM
2.88211	8.40382	PM
7.98438	6.09885	TRANSLATION
7.76311	6.33463	TRANSLATION
7.17336	7.44182	ENDOSOME-VESICLE
3.80101	8.6937	ENDOSOME-VESICLE
5.14374	5.94322	GOLGI APPARATUS
3.74715	8.33911	GOLGI APPARATUS
1.88925	8.90346	PM
12.3741	8.8194	PROTEIN-COMPLEX
7.11752	7.12361	ENDOSOME-VESICLE
-2.91437	12.8182	MITOCHONDRIA
1.53942	3.88197	NUCLEUS
11.5096	11.6817	CYTOPLASM
11.4615	12.1237	CYTOPLASM
11.8261	10.8961	PROTEIN-COMPLEX
-1.56609	8.76889	LYSOSOME
10.4606	11.0125	CYTOPLASM
10.112	9.44953	ENDOSOME-VESICLE
-2.70247	13.2478	MITOCHONDRIA
10.1233	9.71254	CYTOPLASM
-2.89322	11.4714	MITOCHONDRIA
-2.80199	13.1639	MITOCHONDRIA
-3.17063	12.2913	MITOCHONDRIA
2.76376	5.57696	ER
10.006	9.75319	CYTOPLASM
-2.79733	13.118	MITOCHONDRIA
1.77703	3.45467	NUCLEUS
8.30164	4.90072	TRANSLATION
10.1646	9.61739	CYTOPLASM
11.8125	9.87876	PROTEIN-COMPLEX
2.15788	7.77196	PM
11.0674	11.9728	CYTOPLASM
-2.72413	13.2224	MITOCHONDRIA
-2.75009	13.2134	MITOCHONDRIA
8.19127	9.60109	NUCLEUS
11.2217	12.4967	CYTOPLASM
-2.71256	13.1462	MITOCHONDRIA
-2.64509	12.9856	MITOCHONDRIA
1.04413	8.88068	ER
2.85253	7.71236	PM
-0.501211	7.01503	NUCLEUS
0.985875	8.71307	ER
11.8879	12.2553	CYTOPLASM
-3.12558	12.0856	MITOCHONDRIA
10.0907	10.5503	CYTOPLASM
8.33932	4.8492	TRANSLATION
8.33756	4.89375	TRANSLATION
-0.668041	10.4454	MITOCHONDRIA
10.8873	9.9437	CYTOPLASM
2.61943	7.14824	PM
-2.64674	13.292	MITOCHONDRIA
-0.493798	10.9302	MITOCHONDRIA
9.40828	9.49603	PROTEIN-COMPLEX
1.94558	7.7005	PM
11.9211	11.6557	CYTOPLASM
3.60468	6.17998	ENDOSOME-VESICLE
-3.13096	12.3774	MITOCHONDRIA
2.27044	9.20777	PM
8.96741	10.8788	MITOCHONDRIA
8.38923	4.76515	TRANSLATION
2.75131	7.11038	PM
-2.96376	12.574	MITOCHONDRIA
-1.83291	13.0408	MITOCHONDRIA
12.5546	8.9277	PROTEIN-COMPLEX
12.6602	8.84881	PROTEIN-COMPLEX
12.7752	8.17564	PROTEIN-COMPLEX
2.15462	7.78749	PM
8.25035	4.9736	TRANSLATION
4.40697	6.13279	GOLGI APPARATUS
10.6726	10.8592	CYTOPLASM
12.5258	9.1848	CYTOPLASM
1.39283	8.48356	ER
-3.3096	10.8715	MITOCHONDRIA
-3.01532	12.3651	MITOCHONDRIA
11.6726	12.0602	CYTOPLASM
2.68633	7.41657	ENDOSOME-VESICLE
8.09639	5.36133	TRANSLATION
8.19846	6.34042	TRANSLATION
2.1088	9.0642	PM
0.985272	9.12387	ER
1.77486	8.87128	ER
11.2618	11.4306	CYTOPLASM
12.6999	8.67109	PROTEIN-COMPLEX
3.67284	8.47122	PROTEIN-COMPLEX
12.4328	9.36775	PROTEIN-COMPLEX
12.6079	8.89512	PROTEIN-COMPLEX
12.5741	8.91762	PROTEIN-COMPLEX
12.7419	8.36465	PROTEIN-COMPLEX
11.1952	12.0371	CYTOPLASM
-1.96067	10.6115	PEROXISOME
-1.19286	11.0847	MITOCHONDRIA
-2.83456	11.7792	MITOCHONDRIA
10.2651	10.3414	CYTOPLASM
12.0184	11.7071	CYTOPLASM
11.8612	11.2959	CYTOPLASM
11.8305	11.1322	PROTEIN-COMPLEX
2.70871	7.63017	PM
-3.03602	12.7009	MITOCHONDRIA
0.984532	9.21527	ER
11.2398	12.111	CYTOPLASM
10.5407	11.0043	CYTOPLASM
-2.57829	13.3088	MITOCHONDRIA
-2.93276	12.6619	MITOCHONDRIA
8.43905	4.77235	TRANSLATION
-2.71675	13.2116	MITOCHONDRIA
11.106	12.5902	CYTOPLASM
1.08419	9.12834	ER
11.5113	12.1918	CYTOPLASM
11.5497	12.3615	CYTOPLASM
-2.6501	13.3038	MITOCHONDRIA
11.992	11.4987	CYTOPLASM
10.3329	11.4652	CYTOPLASM
11.6001	11.6837	CYTOPLASM
-2.98613	12.7579	MITOCHONDRIA
-2.9825	12.8209	MITOCHONDRIA
10.3696	10.1287	CYTOPLASM
5.38976	7.79546	GOLGI APPARATUS
11.4236	11.221	CYTOPLASM
9.96137	9.80584	CYTOPLASM
-2.66191	13.2302	MITOCHONDRIA
-2.08701	12.4441	MITOCHONDRIA
10.3317	11.509	CYTOPLASM
11.3699	11.5875	NUCLEUS
11.2497	12.0791	CYTOPLASM
12.0223	11.8673	CYTOPLASM
11.6759	12.2889	CYTOPLASM
11.9592	11.6916	CYTOPLASM
-3.35271	11.1891	MITOCHONDRIA
7.37344	5.02411	CYTOPLASM
10.5498	11.2686	CYTOPLASM
7.72081	9.55673	PM
8.12634	5.2834	TRANSLATION
10.6401	11.317	CYTOPLASM
-0.779856	11.0042	MITOCHONDRIA
4.59569	6.13159	GOLGI APPARATUS
-0.93918	8.35134	ER
2.63744	1.29238	PROTEIN-COMPLEX
-1.52461	9.05557	LYSOSOME
2.80115	8.6764	PM
11.3599	10.4145	CYTOPLASM
-2.74674	11.557	MITOCHONDRIA
10.5018	9.9343	CYTOPLASM
3.02154	8.03977	PM
-2.63273	13.2688	MITOCHONDRIA
-1.26212	7.3181	NUCLEUS
8.39242	4.7846	TRANSLATION
9.20583	11.0632	CYTOPLASM
-1.03808	8.85812	LYSOSOME
10.447	11.2649	CYTOPLASM
12.6312	8.02963	PROTEIN-COMPLEX
8.4435	11.6612	PROTEIN-COMPLEX
10.1985	9.4464	PROTEIN-COMPLEX
3.08115	7.99603	PM
10.1908	12.3071	CYTOPLASM
11.6611	12.3161	CYTOPLASM
-2.66118	13.119	MITOCHONDRIA
13.0439	8.17172	PROTEIN-COMPLEX
1.48452	7.98957	PM
10.2135	10.7386	CYTOPLASM
-3.2958	10.999	MITOCHONDRIA
-2.72401	13.196	MITOCHONDRIA
8.12758	5.26466	TRANSLATION
10.5297	11.3152	CYTOPLASM
2.72998	7.25116	ER
1.62674	8.949	ER
-2.9362	12.9058	MITOCHONDRIA
2.10032	7.53591	ER
11.1056	12.1732	CYTOPLASM
10.5174	11.1288	CYTOPLASM
-2.68939	13.2475	MITOCHONDRIA
1.63321	4.4632	NUCLEUS
1.47949	8.66523	ER
10.1869	9.54466	PROTEIN-COMPLEX
-2.78061	13.1545	MITOCHONDRIA
2.30842	4.98954	NUCLEUS
8.78879	12.1075	TRANSLATION
8.39785	4.76287	TRANSLATION
8.15741	5.18993	TRANSLATION
11.6429	10.5421	PROTEIN-COMPLEX
12.6326	9.03792	PROTEIN-COMPLEX
8.20241	5.02796	TRANSLATION
12.7194	9.03529	CYTOPLASM
10.1588	9.69796	CYTOPLASM
-2.70351	13.2877	MITOCHONDRIA
-0.252392	5.0946	NUCLEUS
7.88423	6.01573	TRANSLATION
2.29037	3.83039	NUCLEUS
9.16113	6.87766	TRANSLATION
10.3173	10.081	CYTOPLASM
9.93616	9.63438	CYTOPLASM
12.4743	8.42242	PROTEIN-COMPLEX
-2.55725	13.312	MITOCHONDRIA
-1.85631	10.2082	NUCLEUS
-0.378019	5.12336	NUCLEUS
10.7333	9.53056	PROTEIN-COMPLEX
12.5173	8.84196	PROTEIN-COMPLEX
11.6258	11.6864	CYTOPLASM
8.31967	4.78766	TRANSLATION
-3.05301	12.0648	MITOCHONDRIA
-3.06217	12.7421	MITOCHONDRIA
8.20739	5.28347	TRANSLATION
11.4974	12.1742	CYTOPLASM
-0.306416	9.03592	LYSOSOME
10.8138	9.67765	PROTEIN-COMPLEX
-2.7275	13.1966	MITOCHONDRIA
1.38399	7.81571	ER
-3.11362	12.2644	MITOCHONDRIA
11.6867	12.367	CYTOPLASM
12.6303	8.80816	PROTEIN-COMPLEX
-3.06669	12.333	MITOCHONDRIA
9.75165	10.9103	CYTOPLASM
-3.30528	11.4649	MITOCHONDRIA
-3.01242	12.6159	MITOCHONDRIA
10.4094	10.3968	CYTOPLASM
10.4847	10.0713	CYTOPLASM
12.6742	8.91605	PROTEIN-COMPLEX
10.5173	11.278	NUCLEUS
1.13987	3.88496	NUCLEUS
0.681171	3.76761	NUCLEUS
0.19547	7.36222	MITOCHONDRIA
10.0407	9.73653	CYTOPLASM
8.16469	5.15517	TRANSLATION
8.25019	4.95503	TRANSLATION
8.11401	5.29444	TRANSLATION
8.17398	5.2289	TRANSLATION
8.29617	4.90018	TRANSLATION
8.39655	4.7842	TRANSLATION
8.31069	4.87456	TRANSLATION
9.80547	9.61738	CYTOPLASM
4.46064	9.16121	PM
10.4522	9.49055	PROTEIN-COMPLEX
1.25148	8.58212	ER
10.1433	9.15528	CYTOPLASM
10.5428	10.5431	CYTOPLASM
10.6975	10.208	PROTEIN-COMPLEX
-2.46305	13.0837	MITOCHONDRIA
9.74994	10.1918	CYTOPLASM
11.1326	12.6517	CYTOPLASM
10.5939	8.9252	ENDOSOME-VESICLE
1.90892	8.85244	ER
10.4393	11.3988	CYTOPLASM
12.7731	8.43431	PROTEIN-COMPLEX
12.5468	9.17841	PROTEIN-COMPLEX
1.77567	8.93468	ER
-2.99906	12.7948	MITOCHONDRIA
10.4261	10.5217	CYTOPLASM
2.10647	8.45743	ER
9.97666	10.0622	CYTOPLASM
8.30741	5.25916	TRANSLATION
11.2167	12.1896	CYTOPLASM
12.031	12.1157	PROTEIN-COMPLEX
12.5878	9.10267	PROTEIN-COMPLEX
-3.03138	12.5198	MITOCHONDRIA
-2.69144	13.1782	MITOCHONDRIA
11.1742	12.2142	CYTOPLASM
10.3913	11.1874	CYTOPLASM
10.9732	11.432	CYTOPLASM
3.53117	9.95397	GOLGI APPARATUS
10.2019	10.5971	CYTOPLASM
3.53959	3.52161	NUCLEUS
12.7274	8.43476	PROTEIN-COMPLEX
12.4702	9.03221	PROTEIN-COMPLEX
1.12428	4.05709	NUCLEUS
-3.31309	10.9364	MITOCHONDRIA
-1.90455	12.4897	MITOCHONDRIA
4.98058	7.89092	GOLGI APPARATUS
2.94175	5.57809	NUCLEUS
7.88172	5.98935	TRANSLATION
11.211	12.5224	CYTOPLASM
1.60678	4.20961	NUCLEUS
1.89437	4.05049	NUCLEUS
10.5208	11.0072	CYTOPLASM
2.29801	9.16982	PM
-2.67577	13.2305	MITOCHONDRIA
12.0626	11.9902	CYTOPLASM
10.4847	10.0193	CYTOPLASM
1.28138	8.69768	ER
9.31763	7.13091	MITOCHONDRIA
1.19861	8.00837	ER
12.0092	11.7453	CYTOPLASM
10.2886	9.45319	PROTEIN-COMPLEX
11.8908	11.9192	CYTOPLASM
8.23171	5.23552	TRANSLATION
12.6625	9.08654	PROTEIN-COMPLEX
12.5864	9.07734	PROTEIN-COMPLEX
2.73794	8.34146	ER
3.05458	9.49874	ER
-3.19416	11.83	MITOCHONDRIA
5.15803	6.44354	PM
-2.97416	12.6921	MITOCHONDRIA
10.5002	11.1742	CYTOPLASM
0.973019	8.62107	ER
1.88285	9.22425	ER
-3.00659	12.6114	MITOCHONDRIA
-1.90187	10.0899	PEROXISOME
12.7113	8.48921	PROTEIN-COMPLEX
-2.4946	13.2896	MITOCHONDRIA
-1.06655	8.9231	LYSOSOME
10.4529	10.121	CYTOPLASM
6.57252	7.30928	ENDOSOME-VESICLE
4.64641	7.83521	PM
-2.94733	12.8033	MITOCHONDRIA
1.1108	5.77431	NUCLEUS
7.34589	4.9942	NUCLEUS
10.7371	9.84218	CYTOPLASM
11.3191	12.2827	CYTOPLASM
10.6068	11.3304	CYTOPLASM
2.94326	5.10323	MITOCHONDRIA
-2.88297	12.4859	MITOCHONDRIA
4.60235	6.2115	GOLGI APPARATUS
4.3637	6.04074	GOLGI APPARATUS
10.5076	11.1471	CYTOPLASM
10.3563	10.1769	CYTOPLASM
9.6185	10.2088	NUCLEUS
10.3009	10.3534	CYTOPLASM
-2.87108	12.8964	MITOCHONDRIA
11.6339	11.9991	CYTOPLASM
-2.64299	13.1741	MITOCHONDRIA
11.2039	11.948	CYTOPLASM
11.4715	9.33171	PROTEIN-COMPLEX
11.7608	7.96948	PROTEIN-COMPLEX
7.56787	6.33502	TRANSLATION
-3.2385	11.7857	MITOCHONDRIA
10.4745	10.1206	CYTOPLASM
10.5888	8.97331	ENDOSOME-VESICLE
-1.30802	8.76503	LYSOSOME
9.93566	9.18395	ENDOSOME-VESICLE
-2.48247	13.3311	MITOCHONDRIA
2.17576	9.18396	PM
2.97412	7.95064	ER
10.5715	11.1369	CYTOPLASM
11.684	9.46063	PROTEIN-COMPLEX
11.4545	9.35932	PROTEIN-COMPLEX
-1.45903	8.79201	LYSOSOME
-1.10475	8.6101	LYSOSOME
-2.50339	13.1026	MITOCHONDRIA
-3.30156	11.0544	MITOCHONDRIA
10.865	11.304	CYTOPLASM
1.67598	7.8713	PM
12.5674	8.67195	PROTEIN-COMPLEX
10.301	10.0012	CYTOPLASM
2.84864	4.04436	LD
1.40249	8.05453	ER
11.8289	10.8492	PROTEIN-COMPLEX
-2.67861	12.9224	MITOCHONDRIA
0.682705	8.69018	ER
10.2473	10.5864	CYTOPLASM
10.3796	10.9884	CYTOPLASM
0.939081	5.57574	NUCLEUS
7.62388	9.52136	PM
10.5208	9.79839	ENDOSOME-VESICLE
-2.59675	12.816	MITOCHONDRIA
-2.8067	13.2778	MITOCHONDRIA
8.56038	6.74663	TRANSLATION
11.2574	12.3897	CYTOPLASM
3.20697	8.7216	GOLGI APPARATUS
4.64095	5.91933	GOLGI APPARATUS
-2.44928	13.3348	MITOCHONDRIA
-3.1017	12.5738	MITOCHONDRIA
3.50049	6.97074	NUCLEUS
6.56139	7.31829	GOLGI APPARATUS
2.77059	3.76044	LD
1.81991	4.07461	NUCLEUS
10.108	9.65815	CYTOPLASM
11.8684	12.1432	CYTOPLASM
2.38294	4.19497	MITOCHONDRIA
8.61146	6.75368	TRANSLATION
1.17639	8.09239	ER
10.0357	9.8416	CYTOPLASM
3.0099	2.88159	LD
10.7515	11.4869	CYTOPLASM
8.32765	4.87542	TRANSLATION
12.6586	9.05474	PROTEIN-COMPLEX
1.48082	8.29585	ER
8.55355	9.70421	CYTOPLASM
3.52296	8.1153	GOLGI APPARATUS
3.89649	8.87539	ENDOSOME-VESICLE
10.5021	10.7638	CYTOPLASM
4.94121	7.96408	GOLGI APPARATUS
11.6885	11.9375	CYTOPLASM
7.00158	7.15929	ENDOSOME-VESICLE
12.3655	8.42985	PROTEIN-COMPLEX
11.5005	10.6893	PROTEIN-COMPLEX
10.3801	10.6817	CYTOPLASM
8.62636	6.8546	TRANSLATION
3.52611	8.30267	PM
2.85503	3.70445	PM
8.31768	4.88917	TRANSLATION
8.29662	4.85086	TRANSLATION
8.13562	5.26662	TRANSLATION
8.23691	4.93705	TRANSLATION
9.63641	8.69356	NUCLEUS
3.57344	8.498	ENDOSOME-VESICLE
-2.37622	13.1265	MITOCHONDRIA
11.8766	12.2086	CYTOPLASM
9.85144	9.7635	CYTOPLASM
5.8983	7.40666	GOLGI APPARATUS
5.85759	7.41003	GOLGI APPARATUS
1.84729	4.06772	NUCLEUS
11.0218	11.7992	CYTOPLASM
-1.74383	12.6537	MITOCHONDRIA
8.31651	4.89967	TRANSLATION
12.5946	8.88327	PROTEIN-COMPLEX
13.0666	8.22646	PROTEIN-COMPLEX
8.36098	4.82632	TRANSLATION
8.21654	5.02692	TRANSLATION
8.23397	5.03736	TRANSLATION
11.133	12.5081	CYTOPLASM
11.0283	11.8792	CYTOPLASM
8.29693	4.82349	TRANSLATION
8.32331	4.82183	TRANSLATION
6.38677	10.74	TRANSLATION
8.36447	4.83702	TRANSLATION
1.9469	4.30015	NUCLEUS
10.438	12.8186	CYTOPLASM
8.16153	5.32195	TRANSLATION
8.33374	4.85097	TRANSLATION
11.6004	10.4192	PROTEIN-COMPLEX
8.08073	5.29134	TRANSLATION
8.27318	4.90765	TRANSLATION
8.37694	5.22301	TRANSLATION
3.33479	8.46657	PM
8.24926	5.32899	TRANSLATION
2.23696	7.94559	PM
2.97347	7.7303	PM
9.03858	5.17107	TRANSLATION
8.34416	4.8779	TRANSLATION
8.35744	4.84184	TRANSLATION
8.03218	5.22755	TRANSLATION
1.99189	4.04832	NUCLEUS
2.63626	7.41644	PM
3.76159	8.9175	PM
10.7483	10.0579	CYTOPLASM
11.8355	9.93499	PROTEIN-COMPLEX
8.29776	4.93859	TRANSLATION
8.34567	4.76954	TRANSLATION
11.0126	11.2451	CYTOPLASM
8.41493	4.76003	TRANSLATION
11.2674	12.093	CYTOPLASM
11.7645	12.3253	CYTOPLASM
11.5153	12.2658	CYTOPLASM
2.30789	3.79821	NUCLEUS
7.87565	5.92905	TRANSLATION
12.5723	9.18656	PROTEIN-COMPLEX
9.57294	8.98226	TRANSLATION
1.61552	4.88011	NUCLEUS
2.6291	6.75325	PM
11.2349	12.2681	CYTOPLASM
8.34658	4.87447	NUCLEUS
5.70466	7.10962	GOLGI APPARATUS
1.93736	7.9389	ER
4.9075	5.87462	GOLGI APPARATUS
-3.08113	12.4704	MITOCHONDRIA
-3.28333	11.6802	MITOCHONDRIA
-3.18299	11.1545	MITOCHONDRIA
-3.28969	10.8369	MITOCHONDRIA
-2.72589	13.1575	MITOCHONDRIA
-2.31515	12.0799	MITOCHONDRIA
-2.50695	12.2441	MITOCHONDRIA
-3.28945	11.6164	MITOCHONDRIA
-3.10101	12.5573	MITOCHONDRIA
-2.9901	12.4573	MITOCHONDRIA
-2.88912	12.6605	MITOCHONDRIA
10.7068	9.4489	PROTEIN-COMPLEX
8.18159	5.31606	TRANSLATION
1.19323	5.30313	NUCLEUS
7.90554	6.09473	TRANSLATION
2.12243	5.04864	NUCLEUS
12.387	9.26528	PROTEIN-COMPLEX
6.72369	6.91767	ENDOSOME-VESICLE
7.7862	9.40625	PM
0.796324	4.39909	NUCLEUS
8.48886	7.12832	TRANSLATION
-2.96187	12.9095	MITOCHONDRIA
10.528	11.0577	CYTOPLASM
-3.13869	12.2727	MITOCHONDRIA
2.97152	5.17406	PROTEIN-COMPLEX
2.74301	8.49527	ER
1.78613	4.10115	NUCLEUS
10.6201	9.83706	PROTEIN-COMPLEX
10.0698	10.2192	PROTEIN-COMPLEX
10.3047	10.3136	CYTOPLASM
-1.27316	8.78064	LYSOSOME
11.3643	12.0001	CYTOPLASM
12.0775	9.76582	PROTEIN-COMPLEX
10.3423	11.1685	CYTOPLASM
6.42011	10.783	LYSOSOME
10.257	9.75046	CYTOPLASM
11.2546	12.2817	CYTOPLASM
-3.09982	12.4206	MITOCHONDRIA
-2.98709	12.5999	MITOCHONDRIA
-2.72734	13.182	MITOCHONDRIA
10.3945	10.902	CYTOPLASM
10.6297	11.5103	CYTOPLASM
5.51498	6.83586	GOLGI APPARATUS
8.07344	5.25104	TRANSLATION
1.4897	4.45698	NUCLEUS
11.3825	12.065	CYTOPLASM
-2.80036	12.457	MITOCHONDRIA
1.33487	8.49193	PM
9.76699	9.47031	CYTOPLASM
0.956732	5.63397	NUCLEUS
10.5069	9.90673	CYTOPLASM
8.30227	7.04971	TRANSLATION
3.93652	9.0415	PM
10.9886	12.6555	CYTOPLASM
-2.73989	13.2353	MITOCHONDRIA
4.83439	5.30532	NUCLEUS
10.2813	10.6498	CYTOPLASM
10.2251	9.55883	CYTOPLASM
1.39485	4.32441	NUCLEUS
10.2494	9.6535	CYTOPLASM
10.2508	9.71025	CYTOPLASM
10.9514	9.48854	PROTEIN-COMPLEX
8.8078	7.17529	NUCLEUS
11.7814	12.0672	CYTOPLASM
-0.717255	10.9688	MITOCHONDRIA
-2.54542	10.4687	ER
1.11797	5.41686	NUCLEUS
6.47167	7.19833	ENDOSOME-VESICLE
10.8848	11.7179	CYTOPLASM
8.15955	9.68821	NUCLEUS
-0.475195	11.0213	MITOCHONDRIA
11.6748	11.4273	PROTEIN-COMPLEX
-1.95315	10.3093	PEROXISOME
11.231	11.965	CYTOPLASM
10.2309	8.96064	ENDOSOME-VESICLE
8.38652	6.35635	TRANSLATION
11.2725	11.5392	NUCLEUS
3.9328	8.59305	GOLGI APPARATUS
11.1354	11.9103	CYTOPLASM
4.76551	6.02827	GOLGI APPARATUS
4.80816	6.0982	GOLGI APPARATUS
4.8644	5.99992	GOLGI APPARATUS
-3.08293	12.4971	MITOCHONDRIA
5.11278	5.74917	GOLGI APPARATUS
11.104	12.2096	CYTOPLASM
2.15311	9.14445	ER
11.7183	12.123	CYTOPLASM
3.10368	7.62158	NUCLEUS
1.6941	3.20578	NUCLEUS
11.0554	9.92149	PROTEIN-COMPLEX
4.03793	9.66583	ER
-0.438057	8.51388	ER
2.32606	8.92609	PM
-0.707397	10.9066	MITOCHONDRIA
8.77581	7.15262	NUCLEUS
1.38191	4.34342	NUCLEUS
8.08549	9.65502	NUCLEUS
8.29817	4.86797	NUCLEUS
-0.665343	10.5431	MITOCHONDRIA
1.94895	8.9909	ER
-1.72283	12.6559	MITOCHONDRIA
10.2178	9.59342	CYTOPLASM
10.8647	9.40163	PROTEIN-COMPLEX
10.3256	9.38609	PROTEIN-COMPLEX
-3.20643	11.818	MITOCHONDRIA
12.9809	9.32926	PROTEIN-COMPLEX
12.7039	8.99625	PROTEIN-COMPLEX
10.2386	9.71948	CYTOPLASM
12.3526	9.12328	PROTEIN-COMPLEX
9.60513	10.1599	CYTOPLASM
10.2172	11.1602	CYTOPLASM
0.147671	8.39521	NUCLEUS
10.4145	10.6293	CYTOPLASM
0.815963	9.07448	ER
3.57277	8.21816	GOLGI APPARATUS
13.1118	8.3071	PROTEIN-COMPLEX
-0.903201	11.5094	MITOCHONDRIA
8.23068	9.63958	NUCLEUS
9.16099	6.83533	TRANSLATION
1.57457	4.25717	NUCLEUS
0.194305	8.52328	PM
10.6706	11.6243	CYTOPLASM
8.63984	6.77363	TRANSLATION
10.3748	11.1467	CYTOPLASM
1.86245	8.89037	ER
12.1852	9.57077	CYTOPLASM
8.45168	5.95457	GOLGI APPARATUS
-2.60534	11.358	MITOCHONDRIA
12.4302	8.58253	PROTEIN-COMPLEX
-3.06148	12.3784	MITOCHONDRIA
3.86644	9.0413	PM
2.64768	3.63787	NUCLEUS
2.639	6.91879	PM
0.918158	4.6997	NUCLEUS
0.815659	9.18227	ER
5.08041	7.80086	GOLGI APPARATUS
4.65606	9.81009	PM
-3.20341	11.344	MITOCHONDRIA
2.62906	1.82161	NUCLEUS
10.5699	12.6063	CYTOPLASM
10.1286	9.78037	CYTOPLASM
1.75055	3.15042	NUCLEUS
11.9423	10.6097	PROTEIN-COMPLEX
1.53079	7.74119	ER
2.10032	3.58979	NUCLEUS
10.2872	9.31656	PROTEIN-COMPLEX
10.3568	9.09025	PROTEIN-COMPLEX
10.393	11.5759	CYTOPLASM
7.09539	7.05177	ENDOSOME-VESICLE
2.96633	8.34539	PM
4.9384	9.94349	ER
8.38985	4.87302	TRANSLATION
4.84494	6.2158	GOLGI APPARATUS
-2.71215	13.1766	MITOCHONDRIA
11.8521	11.7617	CYTOPLASM
4.48872	9.44798	PM
11.0931	12.662	CYTOPLASM
10.4991	11.1023	CYTOPLASM
9.92363	9.35251	CYTOPLASM
7.77529	6.3251	TRANSLATION
11.2003	12.1967	CYTOPLASM
10.422	10.5448	CYTOPLASM
7.38808	5.02075	TRANSLATION
8.34227	6.89339	TRANSLATION
4.52973	9.23851	PM
1.50716	3.46231	NUCLEUS
1.61572	4.36714	NUCLEUS
8.51395	6.80828	TRANSLATION
11.2554	10.1439	PROTEIN-COMPLEX
1.16488	8.77883	ER
10.0223	10.0023	CYTOPLASM
11.0218	11.9202	CYTOPLASM
11.3981	11.9822	CYTOPLASM
12.6934	8.2327	PROTEIN-COMPLEX
8.11861	6.19395	TRANSLATION
8.73063	7.33537	TRANSLATION
9.42932	9.51198	CYTOPLASM
0.900485	9.15067	ER
2.55419	3.9951	MITOCHONDRIA
9.56689	10.4048	CYTOPLASM
2.61238	7.29614	PM
10.5513	11.3125	CYTOPLASM
11.674	11.694	CYTOPLASM
2.19399	4.5914	NUCLEUS
-2.36005	10.2748	ER
12.2059	9.56419	PROTEIN-COMPLEX
1.41808	8.17755	ER
7.54574	5.15888	PM
1.62096	8.03697	ER
10.8308	9.50316	PROTEIN-COMPLEX
1.03529	9.09611	ER
1.26439	8.61866	ER
2.29008	7.36982	PM
5.0594	5.76346	GOLGI APPARATUS
2.05467	8.37756	ER
4.91132	6.2245	GOLGI APPARATUS
11.3631	12.4239	CYTOPLASM
12.6237	8.89278	PROTEIN-COMPLEX
4.58152	8.42692	GOLGI APPARATUS
1.03109	8.68878	ER
13.1572	8.23806	PROTEIN-COMPLEX
8.03106	9.33647	CYTOPLASM
1.1058	4.99409	NUCLEUS
-3.21246	11.8665	MITOCHONDRIA
7.09529	7.80726	ENDOSOME-VESICLE
10.509	9.38933	CYTOPLASM
11.5564	12.3536	CYTOPLASM
11.5275	12.3036	CYTOPLASM
-2.09142	10.0758	PEROXISOME
-2.03941	10.1805	PEROXISOME
0.808065	9.09138	ER
-2.6778	13.234	MITOCHONDRIA
-2.80946	13.0763	MITOCHONDRIA
10.8272	12.641	CYTOPLASM
1.39447	8.81754	ER
10.7419	10.8647	CYTOPLASM
10.0223	9.78961	CYTOPLASM
1.30317	5.37253	NUCLEUS
3.12859	6.31547	PM
1.62861	9.13802	ER
5.28084	7.66522	GOLGI APPARATUS
9.62081	9.64571	CYTOPLASM
13.0901	8.2628	PROTEIN-COMPLEX
-1.7749	9.6228	MITOCHONDRIA
1.78676	8.84753	ER
1.41972	5.25662	NUCLEUS
1.64653	3.63659	NUCLEUS
5.28653	7.16262	NUCLEUS
1.05433	4.07531	NUCLEUS
-1.08029	7.42409	NUCLEUS
10.8674	11.7091	CYTOPLASM
-2.87022	12.9917	MITOCHONDRIA
1.33143	8.1676	ER
8.41773	4.82711	NUCLEUS
5.22995	6.36755	GOLGI APPARATUS
2.64147	1.30733	NUCLEUS
2.11965	2.76063	NUCLEUS
8.88243	6.84102	TRANSLATION
10.1839	10.1768	CYTOPLASM
10.5062	11.1263	CYTOPLASM
2.55121	6.53117	LD
3.17026	8.33409	PM
11.6858	12.1762	CYTOPLASM
10.3248	8.88097	CYTOPLASM
1.3913	8.54594	ER
-0.551383	4.05654	CYTOPLASM
1.62663	7.5675	ER
2.73856	8.36414	ER
5.83902	7.53746	ENDOSOME-VESICLE
-2.76286	13.1104	MITOCHONDRIA
12.6085	8.14964	PROTEIN-COMPLEX
10.3605	10.0772	CYTOPLASM
-0.841206	8.19722	GOLGI APPARATUS
11.5382	9.62705	PROTEIN-COMPLEX
10.434	11.2465	CYTOPLASM
-3.25543	11.2476	MITOCHONDRIA
11.6972	11.9613	CYTOPLASM
5.34294	7.08254	GOLGI APPARATUS
7.16137	6.89823	ENDOSOME-VESICLE
-1.66215	11.9597	MITOCHONDRIA
10.508	9.98726	CYTOPLASM
0.79013	4.35842	NUCLEUS
-2.84203	13.0553	MITOCHONDRIA
11.8528	9.80896	GOLGI APPARATUS
-1.33224	12.2351	MITOCHONDRIA
-2.67523	13.2242	MITOCHONDRIA
-3.26534	11.6532	MITOCHONDRIA
8.95669	10.8314	MITOCHONDRIA
-2.57377	13.1299	MITOCHONDRIA
-1.73351	12.4775	MITOCHONDRIA
-2.01193	12.8601	MITOCHONDRIA
1.06037	5.37189	NUCLEUS
1.20008	4.2802	NUCLEUS
10.4734	9.81437	PROTEIN-COMPLEX
2.38793	8.3718	ER
7.10601	7.00424	ENDOSOME-VESICLE
12.0203	11.8691	CYTOPLASM
11.7385	8.35121	CYTOPLASM
-2.67822	13.0972	MITOCHONDRIA
-3.09885	10.9959	MITOCHONDRIA
10.7886	8.79494	CYTOPLASM
-3.07279	12.4194	MITOCHONDRIA
8.18154	5.29655	NUCLEUS
-2.93816	12.8606	MITOCHONDRIA
1.80383	8.79394	ER
-3.18299	12.0991	MITOCHONDRIA
-2.56239	12.9535	MITOCHONDRIA
0.555167	9.09298	ER
11.6254	11.671	NUCLEUS
2.87713	1.94595	NUCLEUS
2.2464	8.76077	ER
-0.303841	5.04288	NUCLEUS
10.1628	9.15111	PROTEIN-COMPLEX
-3.07106	12.3198	MITOCHONDRIA
-3.15193	11.2773	MITOCHONDRIA
2.02309	8.96149	PM
-2.60048	13.1556	MITOCHONDRIA
-3.26662	11.8034	MITOCHONDRIA
2.05988	7.45433	ER
11.8393	12.1018	CYTOPLASM
8.36694	4.85115	TRANSLATION
10.0773	9.63677	CYTOPLASM
-0.531131	11.1825	MITOCHONDRIA
-2.77062	11.8617	MITOCHONDRIA
0.922421	8.44151	ER
1.05649	8.66589	ER
-2.94198	12.9369	MITOCHONDRIA
10.2352	11.1392	CYTOPLASM
-2.23454	12.9015	MITOCHONDRIA
1.85398	6.83354	NUCLEUS
-0.485667	10.9201	MITOCHONDRIA
2.38609	4.06808	NUCLEUS
1.82971	8.86066	ER
1.61051	7.9923	ER
10.9402	9.58754	NUCLEUS
-2.56157	13.2918	MITOCHONDRIA
1.56712	4.29923	NUCLEUS
10.304	10.4254	CYTOPLASM
11.2609	9.85335	CYTOPLASM
-3.05957	12.319	MITOCHONDRIA
3.24651	8.44559	GOLGI APPARATUS
10.599	9.40338	NUCLEUS
4.47845	6.17604	GOLGI APPARATUS
1.54977	3.57254	NUCLEUS
2.01248	8.62096	ER
11.8204	12.087	CYTOPLASM
-2.84961	11.6072	MITOCHONDRIA
-2.50146	13.2845	MITOCHONDRIA
7.17415	7.96175	ENDOSOME-VESICLE
2.52882	6.62338	PM
7.11235	7.0062	ENDOSOME-VESICLE
-2.74197	13.2193	MITOCHONDRIA
10.7926	9.53907	PROTEIN-COMPLEX
11.5789	11.8452	CYTOPLASM
11.6952	11.9606	GOLGI APPARATUS
-3.34841	11.3768	MITOCHONDRIA
-3.23206	11.3112	MITOCHONDRIA
3.50288	8.58475	ER
10.6714	10.1892	CYTOPLASM
-3.29031	11.5695	MITOCHONDRIA
3.12324	5.20672	LD
-0.596017	3.96205	NUCLEUS
10.2511	9.08596	ENDOSOME-VESICLE
-3.00399	11.352	MITOCHONDRIA
11.3424	12.1841	CYTOPLASM
8.46579	9.30635	CYTOPLASM
9.02191	6.64358	TRANSLATION
10.3358	9.34818	PROTEIN-COMPLEX
10.2973	9.43521	CYTOPLASM
11.8651	8.54533	PROTEIN-COMPLEX
11.6836	11.4594	PROTEIN-COMPLEX
6.61479	6.99338	ENDOSOME-VESICLE
10.1509	9.94312	CYTOPLASM
2.76541	4.03631	LD
7.15002	6.97623	ENDOSOME-VESICLE
1.02796	3.90666	NUCLEUS
10.5942	11.4895	CYTOPLASM
10.9662	11.0514	TRANSLATION
2.67038	8.59824	ER
1.94791	3.05943	NUCLEUS
-2.90957	12.4319	MITOCHONDRIA
2.38209	7.11999	PM
10.9691	12.0659	CYTOPLASM
11.4693	9.38268	CYTOPLASM
1.82537	9.14474	PM
11.7538	12.3272	CYTOPLASM
-0.324965	4.92188	NUCLEUS
-2.34935	13.2998	MITOCHONDRIA
9.9232	9.46531	MITOCHONDRIA
1.93853	9.10056	ER
-2.7546	13.15	MITOCHONDRIA
3.30335	8.57728	ER
2.16695	8.43189	ER
2.32347	8.21549	ER
-2.84763	13.0517	MITOCHONDRIA
2.81779	6.0787	PM
-2.26612	13.2178	MITOCHONDRIA
-1.54586	9.2042	MITOCHONDRIA
2.11331	8.89699	ER
1.79687	8.52928	ER
10.1434	10.7384	CYTOPLASM
-2.38836	12.7473	MITOCHONDRIA
1.02025	3.58828	NUCLEUS
1.9331	3.77877	NUCLEUS
-2.68026	12.7409	MITOCHONDRIA
-1.28035	8.74277	LYSOSOME
4.52822	6.08304	GOLGI APPARATUS
-2.58028	13.3706	MITOCHONDRIA
-2.71367	13.202	MITOCHONDRIA
9.13708	9.68994	CYTOPLASM
1.97269	9.10152	PM
-0.321621	4.64816	NUCLEUS
11.2273	12.2056	CYTOPLASM
-3.07456	12.5066	MITOCHONDRIA
-3.26372	11.7346	MITOCHONDRIA
8.37592	4.91538	ENDOSOME-VESICLE
2.28849	7.85557	PM
8.49713	6.77275	TRANSLATION
8.35842	8.85696	GOLGI APPARATUS
12.5962	8.38319	PROTEIN-COMPLEX
11.7949	11.704	CYTOPLASM
3.78645	9.05442	PM
2.78362	9.37811	ER
-2.78191	12.5683	MITOCHONDRIA
10.9018	12.7478	CYTOPLASM
1.5191	9.15456	ER
4.28896	6.04499	GOLGI APPARATUS
2.83146	6.87155	GOLGI APPARATUS
1.19872	9.07479	ER
11.3171	12.0291	CYTOPLASM
1.82856	8.07358	ER
1.22324	8.62183	ER
4.7886	7.94113	PM
10.3958	9.4232	CYTOPLASM
-2.67907	12.9499	MITOCHONDRIA
0.955564	9.17889	ER
4.19663	6.09611	GOLGI APPARATUS
-2.08299	10.2874	ER
2.93402	2.02896	LD
-1.99701	10.3158	PEROXISOME
-2.40155	10.2686	ER
-2.26609	10.2459	ER
8.37271	4.81591	TRANSLATION
-0.359001	9.5818	ER
[truncated: 857 more rows]

## Sheet: 02_D
without upsampling					after upsampling
	Precision	F1	Recall			Precision	F1	Recall
Cytosol	71.3	76.5	83.1		Cytosol	79	79.9	81.1
ER	57.9	67.7	82.4		ER	60.2	69.6	82.8
Golgi	38.9	24.8	22.8		Golgi	69.3	59.4	54.8
Lysosome	33.3	36.4	43.5		Lysosome	52.1	60.4	76.5
Mitochondria	82.1	81.5	82.4		Mitochondria	89.4	86	84.1
Nucleus	60.2	65.1	74.6		Nucleus	79.3	70.3	64.6
Peroxisome	7.8	8	9.5		Peroxisome	23.3	33.9	71.5
PM	35.9	31.3	31.8		PM	48.3	27.6	23.3
Endosome	19.8	6.4	4.8		Endosome	51.6	47.8	48.5
LD	1.6	0.3	0.1		LD	34.9	39.6	49.3
Protein-Complex	54.4	57.3	63.1		Protein-Complex	61.6	65	71.2
Translation	63.3	66.1	69.7		Translation	68.3	74.3	82.5

## Sheet: 02_E_left
NN outputs for markers (Mitochondria)
Cytosol	ER	Golgi	Lysosome	Mitochondria	Nucleus	Peroxisome	PM	Endosome	LD	Protein-Complex	Translation
0.00611533	0.00314684	0.00452589	0.0131399	0.834262	0.00861638	0.0970014	0.0114457	0.00398608	0.00560054	0.00928335	0.00287709
0.0045554	0.00331562	0.0066939	0.014827	0.838565	0.00474008	0.090685	0.0146599	0.00353781	0.00665972	0.00926466	0.0024955
0.00468665	0.0777475	0.00179841	0.0478121	0.678745	0.0100591	0.145522	0.0121298	0.00407162	0.0067896	0.00549379	0.00514434
0.00537793	0.00734832	0.00237384	0.0215536	0.819316	0.00494406	0.10673	0.00905969	0.00428837	0.00721482	0.00805959	0.00373359
0.180866	0.00668919	0.00242598	0.0169191	0.636145	0.0419219	0.0679452	0.00707493	0.0216607	0.0069146	0.00794167	0.00349615
0.00635868	0.00571599	0.00244112	0.0108639	0.902956	0.00603439	0.0353456	0.0079943	0.00410612	0.00605692	0.00871417	0.00341239
0.00871426	0.00571551	0.00171843	0.0413064	0.756105	0.00470846	0.154624	0.00821099	0.00376501	0.00528212	0.00608079	0.00376912
0.00682315	0.00412999	0.0024315	0.0159069	0.85519	0.00935824	0.0767994	0.00815903	0.00396915	0.00564122	0.00812233	0.00346886
0.00651934	0.00213809	0.00280728	0.0234208	0.823343	0.00705717	0.10076	0.00836808	0.0041998	0.0062642	0.0114458	0.00367633
0.00732539	0.00169009	0.00277648	0.0139474	0.898299	0.00895087	0.0393249	0.00821595	0.00364175	0.00485293	0.00836328	0.0026117
0.00549544	0.0100021	0.00296014	0.0182179	0.865894	0.0208535	0.0445858	0.011234	0.00344437	0.00583958	0.00835049	0.00312285
0.00627756	0.00668346	0.00254617	0.0184534	0.813818	0.00888121	0.11481	0.00893198	0.00398143	0.00492584	0.00738974	0.00330168
0.00766397	0.00373602	0.00241292	0.0203991	0.877459	0.0108033	0.0416698	0.0127748	0.00410408	0.00700461	0.00863417	0.00333857
0.00316223	0.00761316	0.00448608	0.0640243	0.794499	0.00823496	0.0900871	0.0102872	0.00246466	0.00309388	0.00755287	0.00449463
0.00530994	0.00271222	0.000813772	0.1129	0.619664	0.0109434	0.230456	0.0059081	0.00136193	0.00333444	0.00409845	0.00249663
0.00538344	0.00450704	0.00754133	0.0657805	0.57939	0.179746	0.120273	0.0142065	8.4276e-05	0.00239574	0.00614009	0.0145515
0.0290384	0.00154068	0.073227	0.0533635	0.413987	0.0400053	0.0627235	0.0397376	0.000981368	0.0269477	0.0652115	0.193236
0.00582092	0.00446856	0.00512007	0.010553	0.88621	0.0178738	0.0255088	0.0187203	0.00436589	0.00731569	0.0109012	0.00314204
0.00600132	0.00684425	0.00232749	0.0839692	0.815169	0.00659592	0.0530189	0.00674484	0.00368097	0.00440819	0.00778643	0.00345312
0.0212982	0.00382055	0.0013882	0.0228157	0.628208	0.0212049	0.233607	0.0264059	0.00499688	0.014443	0.0171731	0.00463837
0.00449256	0.0139428	0.00202754	0.0522949	0.769412	0.00687162	0.106659	0.0273027	0.00318739	0.00412928	0.00568171	0.00399854
0.00653557	0.00284568	0.00342423	0.00503182	0.886531	0.00846739	0.047516	0.0116269	0.00472794	0.00874505	0.011103	0.00344589
0.00672869	0.00328677	0.00229994	0.0199556	0.909036	0.00782526	0.0235428	0.00733249	0.0040463	0.00402347	0.00891334	0.00300903
0.00564027	0.00910767	0.00234941	0.0109878	0.85951	0.00552913	0.0763661	0.00981821	0.00380065	0.0064417	0.00746499	0.00298412
0.000914696	0.072279	0.0054234	0.106716	0.331932	0.0729716	0.0333272	0.0471324	0.00745116	0.0120537	0.012469	0.297329
0.00596967	0.00625937	0.00213776	0.0131415	0.856579	0.012429	0.0736689	0.00897186	0.00371542	0.00595374	0.00767947	0.00349414
0.00675506	0.00790101	0.00162551	0.0413057	0.653746	0.0219249	0.210774	0.00418452	0.000768395	0.0274063	0.0203079	0.00330022
0.0054936	0.00429123	0.00273607	0.0312794	0.834597	0.0050241	0.0812313	0.013603	0.00469858	0.00574513	0.00830694	0.00299353
0.0064627	0.00514619	0.00245863	0.00718209	0.885888	0.00728894	0.054421	0.00851462	0.00372628	0.00715618	0.00854833	0.00320741
0.00197967	0.657897	0.0145168	0.18656	0.0268343	0.0036814	0.020776	0.023673	0.0366791	0.00531288	0.00266966	0.0194204
0.00489234	0.0106259	0.00297663	0.010347	0.775859	0.0052514	0.154972	0.0154696	0.00328599	0.00533264	0.00809325	0.00289441
0.0496748	0.00959305	0.00223938	0.0151704	0.566139	0.0747638	0.124876	0.00930079	0.00718105	0.035671	0.100224	0.00516661
0.00693497	0.00160411	0.00190412	0.0378956	0.888309	0.00523595	0.0333597	0.00489921	0.00428658	0.00416412	0.00857659	0.00283032
0.00651505	0.00265407	0.00278531	0.0164979	0.901651	0.00741566	0.0360601	0.00555248	0.00361551	0.0050352	0.00932527	0.00289198
0.00617587	0.00471812	0.00238782	0.00931775	0.889355	0.00702531	0.0446903	0.0123333	0.00469965	0.00741588	0.00865792	0.00322305
0.00395744	0.112606	0.00240679	0.0765313	0.563745	0.0078906	0.207905	0.00819613	0.00265949	0.00565661	0.00410009	0.00434629
0.00582371	0.00569231	0.00219276	0.0367807	0.87183	0.00572995	0.0448101	0.00596395	0.00459224	0.00492004	0.00813798	0.00352599
0.00444394	0.0194541	0.00466978	0.0456197	0.724307	0.00786797	0.154008	0.015674	0.00455278	0.00622837	0.00808966	0.00508459
0.00591852	0.00336203	0.0123487	0.039545	0.634467	0.00395334	0.258267	0.0117758	0.00987026	0.00727152	0.0108054	0.00241565
0.00610953	0.00561758	0.00240558	0.0211286	0.894267	0.00641754	0.0367179	0.00701308	0.00389213	0.00509277	0.00796998	0.00336828
0.0420676	0.0101816	0.00245169	0.0168809	0.72256	0.0481718	0.117049	0.011383	0.00609183	0.00839906	0.00958408	0.00517948
0.00565207	0.00408922	0.00205414	0.0959947	0.645355	0.0175227	0.19036	0.00205443	0.00118116	0.0280672	0.00434107	0.00332898
0.00640481	0.00347566	0.00359311	0.00925479	0.905158	0.0172177	0.0221839	0.0101657	0.00425594	0.0053362	0.00970563	0.00324856
0.00614997	0.00503729	0.00259701	0.0184979	0.819867	0.00539751	0.0948914	0.0256945	0.0042457	0.00624078	0.00789536	0.00348512
0.0431237	0.0981709	0.00366297	0.0799551	0.204208	0.0349245	0.173506	0.146197	0.0491179	0.0745919	0.0308393	0.0617027
0.00642449	0.0051828	0.0021308	0.00566729	0.806442	0.06258	0.0779938	0.00853843	0.00366184	0.0086251	0.0087597	0.00399426
0.322469	0.00309264	0.000493636	0.0151952	0.152925	0.10996	0.153569	0.081213	0.0224547	0.0591607	0.0741907	0.00527714
0.00520384	0.00637369	0.00336454	0.0165962	0.855931	0.0080452	0.0686602	0.0129204	0.00362989	0.00756743	0.00821029	0.00349762
0.00549211	0.00909998	0.00244371	0.0201887	0.824313	0.00537304	0.101161	0.0133544	0.00348421	0.00474317	0.00714837	0.00319832
0.00546556	0.00640323	0.00268603	0.01507	0.874226	0.00517527	0.0617387	0.00751293	0.00409721	0.00582231	0.00824309	0.00355919
0.00447311	0.00279099	0.0048439	0.0116453	0.79962	0.005981	0.125697	0.0168486	0.0048576	0.0105711	0.00948625	0.00318524
0.00671176	0.00486973	0.00253214	0.0111195	0.902997	0.00827814	0.033027	0.00882617	0.00400529	0.00561738	0.00866516	0.00335054
0.0064239	0.00288087	0.00299955	0.00747861	0.862972	0.00545426	0.0769988	0.00984934	0.00399271	0.00811164	0.00949645	0.0033419
0.00617957	0.00813694	0.00178533	0.0351188	0.740137	0.0389411	0.140226	0.00796619	0.00265372	0.00751453	0.00778135	0.00355868
0.00717403	0.0151922	0.00270633	0.0128706	0.775843	0.0050813	0.149376	0.0106697	0.00322146	0.00615543	0.00786119	0.00384875
0.00686744	0.00238456	0.00244505	0.0392936	0.853805	0.0192065	0.0500333	0.00659716	0.00335298	0.00434955	0.00819492	0.00346951
0.00600888	0.00632611	0.00237633	0.0125769	0.89831	0.00661134	0.0385603	0.00797392	0.00389565	0.00542896	0.00842422	0.00350774
0.00741972	0.00314558	0.00259078	0.0279547	0.887406	0.0123773	0.031349	0.00834336	0.00380082	0.00488344	0.00754283	0.00318617
0.00632623	0.00257757	0.00191414	0.00764	0.907906	0.0167716	0.0233892	0.00939353	0.00461424	0.00772765	0.00916322	0.0025764
0.00644321	0.00335289	0.00263396	0.00641023	0.854445	0.0481581	0.0340211	0.019572	0.00462136	0.00803898	0.0090483	0.00325474
0.0904	0.000657144	0.000213864	0.00344147	0.506697	0.0138432	0.278446	0.0816436	0	0.0203199	0.00233943	0.00199851
0.00493889	0.0136002	0.00219209	0.00605705	0.82916	0.00808506	0.104672	0.0152838	0.00280441	0.00407455	0.00615002	0.00298207
0.00699881	0.00150418	0.00410765	0.00642004	0.691978	0.00728444	0.0352647	0.0215813	0.00454321	0.209114	0.00774188	0.00346139
0.208783	0.00147796	0.00113848	0.0116663	0.413001	0.0300918	0.200373	0.0490809	0.000991416	0.0169617	0.0642357	0.00219902
0.00550371	0.00596601	0.00205853	0.0428457	0.827687	0.00930074	0.0753589	0.00757454	0.00333181	0.00781225	0.00867166	0.00388871
0.000416878	0.00154564	0.0109432	0.178223	0.432523	0.209464	0.100656	0.00810138	0.00229184	0.0452864	0.00799483	0.00255431
0.00530551	0.0161971	0.00209068	0.03029	0.807299	0.00951088	0.0796427	0.0161921	0.00436292	0.00802886	0.00773485	0.0133453
0.00434519	0.00925362	0.000889677	0.0157485	0.69258	0.0312178	0.196765	0.0194619	0.00250263	0.0177156	0.00544903	0.0040712
0.0078498	0.00193697	0.019417	0.0072276	0.688553	0.167761	0.0542345	0.0194909	0.0096132	0.00973146	0.0132085	0.000976647
0.00772244	0.0780458	0.00517331	0.0329672	0.416263	0.0718648	0.229481	0.0505524	0.0345046	0.0203433	0.0410518	0.0120305
0.00649618	0.00238916	0.00262088	0.00777106	0.770609	0.0528288	0.0703526	0.0158354	0.00381436	0.0572931	0.00706005	0.00292976
0.00515585	0.0106469	0.00188186	0.0837767	0.658289	0.01184	0.202848	0.00654892	0.0025076	0.00801189	0.00626546	0.00222789
0.00578057	0.00658327	0.00254658	0.0839156	0.809501	0.00909014	0.0517158	0.00793258	0.00362352	0.00667223	0.00894488	0.0036942
0.00598462	0.00882635	0.00223697	0.0141672	0.825891	0.00606604	0.108406	0.00847775	0.00307691	0.00470602	0.00823863	0.00392295
0.00507415	0.00647886	0.00204048	0.00537217	0.817135	0.00719449	0.122726	0.0105532	0.00325155	0.0099514	0.00769014	0.00253243
0.00612544	0.00449155	0.00251886	0.0318847	0.866644	0.0087073	0.0501626	0.00851681	0.0037274	0.00611225	0.00762257	0.00348669
0.00186911	0.00265906	0.0830957	0.232733	0.244262	0.0116812	0.370531	0.0406956	0.00035452	0.00239099	0.00685873	0.00286912
0.0065393	0.00523276	0.00261972	0.0117648	0.892417	0.00702137	0.0419834	0.00932885	0.00422503	0.0068177	0.00855065	0.00349964
0.00641573	0.00087447	0.00765755	0.0246053	0.878823	0.0260316	0.0090043	0.0184943	0.00660343	0.0071515	0.0126983	0.00164081
0.0056247	0.00754461	0.0020829	0.0181417	0.819801	0.0361949	0.0799353	0.0087057	0.00393954	0.00621868	0.00777629	0.00403503
0.0064565	0.00550626	0.00278934	0.0105801	0.911295	0.00670446	0.0249637	0.00869653	0.00442636	0.00627925	0.00890234	0.00340026
0.00734939	0.0026832	0.175743	0.0113564	0.643002	0.00369847	0.0945199	0.0073128	0.0317714	0.00853223	0.0115312	0.00250037
0.00384651	0.0647926	0.0480144	0.017883	0.667629	0.00497433	0.133104	0.0360014	0.00228768	0.0131965	0.00589424	0.00237624
0.00435347	0.00403157	0.00350798	0.00747878	0.7596	0.0644689	0.0841437	0.0299375	0.00415876	0.0272575	0.00780016	0.00326144
0.00652274	0.00439244	0.00194893	0.00808651	0.852791	0.00906253	0.076826	0.0125453	0.00335016	0.0116953	0.00945443	0.00332444
0.0133135	0.000665164	0.00156285	0.00533315	0.593383	0.0288313	0.142649	0.0549361	0.00108389	0.150686	0.00383496	0.00372102
0.00643388	0.00407916	0.00270751	0.0386553	0.769429	0.0505302	0.0944322	0.0132317	0.00281963	0.00543007	0.00945126	0.00279973
0.00591384	0.00929667	0.00226809	0.0115276	0.81329	0.00875215	0.111065	0.0156067	0.00484492	0.00586891	0.00827966	0.00328667
0.0244085	0.0381017	0.00156608	0.0732328	0.479701	0.0331426	0.183128	0.0543572	0.0121903	0.0473775	0.0284819	0.0243125
0.00377216	0.0379716	0.00791264	0.139478	0.648797	0.0131852	0.0488322	0.0565081	0.0139231	0.0160689	0.00961688	0.00393452
0.00585574	0.00107541	0.00359747	0.115131	0.820312	0.0144048	0.0100057	0.00582161	0.00287275	0.00587975	0.0102517	0.00479251
0.00737758	0.0114369	0.0421533	0.155862	0.464357	0.210015	0.0735579	0.00855116	0.00560907	0.00362801	0.0147825	0.00266908
0.00417699	0.00971409	0.00320255	0.104763	0.803429	0.00841758	0.0487857	0.00421071	0.00295554	0.00189653	0.00528437	0.00316335
0.00474056	0.00148752	0.00588868	0.011626	0.815717	0.0108985	0.0723936	0.0418694	0.00901298	0.00701844	0.0175186	0.00182912
0.00544733	0.0489994	0.0298822	0.0828593	0.717016	0.00738431	0.0230527	0.0635641	0.00365225	0.010014	0.00664461	0.00148377
0.00602484	0.00630457	0.00235448	0.019723	0.85854	0.0114286	0.068368	0.00764476	0.00375935	0.0047673	0.00777846	0.00330628
0.458887	0.0016945	0.000122164	0.00905146	0.194134	0.0565826	0.12562	0.0473974	0.0263789	0.0539299	0.0239154	0.00228656
0.00573872	0.00504761	0.00259542	0.00690685	0.873383	0.0195889	0.0491643	0.0123859	0.00416251	0.00916801	0.00872608	0.00313265
0.00574071	0.0726092	0.00758373	0.0857305	0.313658	0.00534673	0.436478	0.0245609	0.0016998	0.0414142	0.00331942	0.00185854
0.00489297	0.00870529	0.00227574	0.00506796	0.842409	0.0104816	0.0876074	0.00859369	0.0037414	0.0116132	0.0100512	0.00456035
0.0064598	0.0057074	0.00258575	0.0301978	0.831877	0.0142256	0.0757442	0.0168112	0.00317502	0.00304994	0.00742851	0.00273746
0.00498229	0.00225325	0.00614496	0.00406567	0.892173	0.0277646	0.014771	0.0176673	0.00572318	0.0100346	0.0107706	0.00364945
0.00718017	0.00319613	0.00271008	0.0115097	0.822101	0.0109812	0.0987441	0.0170918	0.00503947	0.00763299	0.0103768	0.00343681
0.00564174	0.011013	0.0078938	0.0393141	0.804841	0.00796522	0.0312389	0.0391124	0.00870708	0.0117361	0.00913414	0.023402
0.00630677	0.00661873	0.00227487	0.0166976	0.807623	0.00516341	0.123746	0.0109152	0.0037619	0.00591883	0.00744305	0.00353096
0.00560105	0.00582058	0.00263077	0.00963276	0.892302	0.00771689	0.0406686	0.00949188	0.00399176	0.00921776	0.00900121	0.00392429
0.00591713	0.00520996	0.00261604	0.00908938	0.802305	0.0886402	0.052639	0.0100045	0.00459959	0.00678696	0.00875228	0.00343955
0.00434201	0.00601002	0.00266182	0.00506405	0.779973	0.0777368	0.0874731	0.0102346	0.00298879	0.0124383	0.0076915	0.00338595
0.00664679	0.00225118	0.00159958	0.00708045	0.79377	0.00931661	0.144739	0.0107194	0.00224892	0.0101536	0.00846885	0.00300493
0.00632185	0.00485216	0.00191574	0.0196348	0.826434	0.00803995	0.0906678	0.0123619	0.00381332	0.0113427	0.0106089	0.00400682
0.00237607	0.105056	0.00152265	0.0216478	0.649871	0.0065678	0.146282	0.0278978	0.00470493	0.0231019	0.00565219	0.00532021
0.00388361	0.0195927	0.00216019	0.0850456	0.747316	0.0128908	0.0987435	0.0100559	0.00320722	0.0062495	0.00691094	0.00394364
0.00552644	0.00312823	0.00270753	0.00300898	0.596787	0.0225981	0.121221	0.00952335	0.00357984	0.219192	0.00918802	0.00353952
0.00613013	0.0056523	0.00272622	0.00841045	0.892518	0.00626848	0.0434969	0.0109701	0.00428708	0.00695803	0.00896414	0.00361773
0.00433548	0.00495717	0.00303797	0.00490778	0.787129	0.0825139	0.0631546	0.0206719	0.00390453	0.0133958	0.00861832	0.00337333
0.00515503	0.0107746	0.00194947	0.0171032	0.831637	0.00999982	0.0927272	0.00919649	0.00398844	0.00572128	0.00780555	0.00394236
0.0068521	0.00657402	0.00240147	0.0357079	0.869874	0.0101177	0.035895	0.00907992	0.00482353	0.00667926	0.00857097	0.00342461
0.00581807	0.00515805	0.00278929	0.0041873	0.903053	0.0099291	0.0301118	0.0123802	0.00437486	0.00964299	0.00931865	0.00323661
0.00581395	0.00387399	0.00320749	0.0266732	0.772206	0.0127949	0.137477	0.011849	0.00482413	0.0079765	0.00863999	0.00466342
0.00408963	0.00519931	0.00502776	0.010145	0.843131	0.0162523	0.0411889	0.0514283	0.00369808	0.00999019	0.00814333	0.00170635
0.0049842	0.0131032	0.00255743	0.0070024	0.849714	0.00800477	0.0786112	0.0123868	0.00253892	0.0101932	0.00709978	0.00380384
0.00548146	0.0336744	0.00510074	0.0610219	0.636075	0.0452896	0.0954489	0.0671531	0.0111563	0.0259625	0.0105575	0.00307813
0.00784228	0.00746013	0.00165285	0.0256957	0.748944	0.00802998	0.160985	0.0153422	0.00463268	0.00771466	0.00753298	0.00416705
0.00428412	0.0086771	0.00181736	0.00946264	0.756756	0.0312748	0.13769	0.0239445	0.00242313	0.0130415	0.00668763	0.00394105
0.0419299	0.00097164	0.00782447	0.0240186	0.381274	0.0268393	0.117822	0.0257939	0.0118902	0.0380724	0.315251	0.00831215
0.00554713	0.0264395	0.00834251	0.043989	0.198114	0.00390895	0.696193	0.0060409	0.00203002	0.00495538	0.00232515	0.00211398
0.00550862	0.00645671	0.00209285	0.0416904	0.769232	0.0109915	0.114451	0.00665911	0.0016995	0.0295921	0.00847001	0.00315611
0.00399718	0.00630751	0.0039158	0.0106935	0.882114	0.0170013	0.0353973	0.0110536	0.00414384	0.00846123	0.00924017	0.00767451
0.00564376	0.0125048	0.00260658	0.0120226	0.793456	0.0449855	0.0671319	0.0418114	0.00319103	0.00649808	0.00691722	0.00323093
0.00603708	0.00659156	0.00229398	0.010176	0.855895	0.00926286	0.080108	0.00755505	0.00345833	0.00692845	0.00811662	0.00357741
0.0043271	0.154758	0.00686298	0.0523801	0.535851	0.0257789	0.0404686	0.0630566	0.0115388	0.0262075	0.00451566	0.0742541
0.0046522	0.00396957	0.00223384	0.00672603	0.832539	0.0204791	0.0926355	0.00954234	0.00376651	0.0116398	0.00921427	0.00260147
0.00639036	0.00611486	0.00228962	0.0129719	0.904316	0.00456986	0.0337086	0.00823156	0.00399082	0.00579052	0.00845424	0.00317172
0.0608625	0.170209	0.0967845	0.0809903	0.200729	0.0162262	0.297451	0.0166974	0.00746178	0.0296966	0.0113977	0.0114944
0.00561004	0.00598894	0.00231297	0.00890957	0.870517	0.00826903	0.0682836	0.00782364	0.00331298	0.00736468	0.00811775	0.00348985
0.00532031	0.00875249	0.00198755	0.0176012	0.8584	0.00778598	0.0620441	0.0153507	0.00438078	0.00741799	0.00753025	0.00342854
0.00539753	0.00532343	0.00258746	0.00618214	0.870884	0.0221486	0.0501707	0.0105109	0.00423766	0.00972092	0.00916527	0.00367102
0.00579891	0.00670172	0.00246029	0.0220815	0.879088	0.00579616	0.048005	0.00826783	0.00415272	0.00584358	0.00828814	0.0035165
0.00373872	0.0689405	0.0169097	0.099076	0.363497	0.0320989	0.142335	0.0934451	0.0288857	0.0497905	0.0268603	0.0744233
0.00708403	0.00393756	0.00192125	0.0171768	0.855119	0.012728	0.0669374	0.0124769	0.00429517	0.0061946	0.00863471	0.00349443
0.00595159	0.0058308	0.00161579	0.01059	0.820708	0.0123034	0.105653	0.0128027	0.00390527	0.00875977	0.00765637	0.00422304
0.0061607	0.0176249	0.00230756	0.044619	0.647689	0.0344022	0.196119	0.0292851	0.00431968	0.00691775	0.00622357	0.00433197
0.00617246	0.00498006	0.00228495	0.0222589	0.882203	0.00532762	0.050441	0.00521221	0.00462349	0.00470054	0.00827677	0.00351939
0.00577133	0.00581531	0.00251472	0.0114525	0.875592	0.00629501	0.0579742	0.0123337	0.00388445	0.00657239	0.00846175	0.00333255
0.00614746	0.00799452	0.00220112	0.0163043	0.783606	0.00832696	0.145563	0.00901516	0.00436504	0.00545079	0.00713167	0.00389453
0.00579812	0.00519753	0.00211422	0.0107605	0.811718	0.0237123	0.104171	0.00728172	0.00331899	0.013486	0.00826822	0.00417331
0.0039729	0.0404788	0.0022896	0.0501844	0.691842	0.0211496	0.130993	0.0387081	0.00423384	0.00589175	0.00575146	0.00450475
0.00536185	0.00927423	0.002395	0.0101002	0.868512	0.0116808	0.0647164	0.00834723	0.00320164	0.00502418	0.00793531	0.00345136
0.00587012	0.00548782	0.00268015	0.00856316	0.88976	0.0170374	0.0352167	0.0118134	0.00415509	0.00721062	0.00888312	0.0033222
0.00349353	0.00745859	0.0245801	0.0241676	0.73855	0.0186649	0.069517	0.00775975	0.00110272	0.00809369	0.0928982	0.00371389
0.00569685	0.00643264	0.00234081	0.0109106	0.859515	0.00785631	0.06867	0.0138771	0.00447477	0.00736174	0.00893792	0.00392661
0.00726594	0.00652741	0.00161548	0.020838	0.774256	0.00769244	0.156138	0.00719389	0.0025	0.00540525	0.00772623	0.00284143
0.00564666	0.00821805	0.00188256	0.0223202	0.700638	0.0864603	0.140673	0.014822	0.00383143	0.00560661	0.00637322	0.00352798
0.00428527	0.0997868	0.0102751	0.11716	0.499832	0.0168084	0.216863	0.0132405	0.00512591	0.00605939	0.0064634	0.00410098
0.0054028	0.00488578	0.00214671	0.00376018	0.878863	0.0121053	0.0528494	0.0107992	0.00383479	0.0124133	0.00924462	0.00369438
0.0062187	0.00535702	0.00273047	0.011215	0.899274	0.00819258	0.0364279	0.00844787	0.00416154	0.006082	0.00846512	0.00342806
0.00597353	0.00874422	0.00197911	0.0142706	0.836812	0.00849057	0.0900958	0.0110712	0.0040546	0.00781741	0.00793223	0.00275864
0.00564309	0.00979005	0.00498077	0.00622007	0.781432	0.0151894	0.128649	0.0260882	0.0034828	0.00591991	0.00865471	0.00394989
0.00705415	0.00264192	0.00063348	0.00786857	0.752138	0.0430823	0.135258	0.0183557	0.00131286	0.022078	0.00625015	0.00332711
0.00812041	0.007651	0.00153991	0.0133188	0.69435	0.00991646	0.219339	0.0173554	0.00423364	0.00990257	0.00905433	0.00521802
0.00714347	0.00384591	0.00246784	0.0304945	0.809831	0.0094061	0.103923	0.00687826	0.00434783	0.00744832	0.0101308	0.00408309
0.00621055	0.00587734	0.00254015	0.0105767	0.762253	0.0530579	0.0567805	0.024081	0.00413984	0.0627412	0.00766811	0.00407395
0.00507463	0.0156783	0.00197313	0.0286183	0.814118	0.00792932	0.0987894	0.00869671	0.00340046	0.00546209	0.0062228	0.00403674
0.00601101	0.0086979	0.0022945	0.0270035	0.859874	0.0079544	0.0596409	0.00895468	0.00406715	0.00520996	0.00760899	0.00268326
0.0058541	0.00581489	0.00241564	0.0299036	0.882187	0.00650379	0.0379221	0.00773024	0.00408084	0.00556887	0.00845434	0.00356485
0.00515554	0.0181619	0.00243121	0.00997451	0.866256	0.00623148	0.0549524	0.0138015	0.00400661	0.00843126	0.00757399	0.00302349
0.00538741	0.0105939	0.00266042	0.00902284	0.824518	0.0466831	0.0639015	0.0152838	0.00375629	0.00643282	0.00819921	0.00356041
0.00536181	0.00765502	0.0026608	0.00737722	0.899595	0.00569312	0.0389288	0.00982511	0.00375711	0.00730026	0.00866882	0.00317657
0.00560905	0.00632556	0.00461263	0.0172072	0.831767	0.0143868	0.059056	0.02253	0.00758131	0.00796872	0.0111383	0.0118173
0.00544602	0.00625412	0.00275701	0.00840942	0.885899	0.00634807	0.0520827	0.0100769	0.00382297	0.0073982	0.00830908	0.00319642
0.00734773	0.00742667	0.00180854	0.0191933	0.796199	0.0253842	0.11011	0.012941	0.00349838	0.00509603	0.00730384	0.0036909
0.00601643	0.00765391	0.00227038	0.00877462	0.884592	0.00606055	0.0529662	0.00979256	0.00361901	0.00658516	0.00820035	0.00346925
0.0058339	0.00612366	0.00266546	0.00812965	0.893599	0.00818797	0.0423561	0.00968742	0.00392991	0.00701419	0.00893919	0.00353382
0.00585598	0.00165092	0.00629999	0.0164328	0.906508	0.0144854	0.0167047	0.00897949	0.00573745	0.00535172	0.00949931	0.00249437
0.00749661	0.00439403	0.0015706	0.0171617	0.839667	0.00753063	0.0838949	0.0151118	0.00358137	0.00901579	0.00576878	0.00480659
0.00580095	0.0052857	0.00239266	0.0190878	0.866245	0.00750598	0.0629567	0.00801054	0.00422199	0.00549256	0.00938225	0.0036179
0.00555348	0.0063693	0.00247182	0.00806526	0.864109	0.0149628	0.0672438	0.00905066	0.00366542	0.00679405	0.00821823	0.00349662
0.00793452	0.00216494	0.00328809	0.0143905	0.869225	0.006759	0.0624268	0.0116143	0.00329248	0.00685082	0.00883368	0.00321971
0.00830964	0.00482956	0.00176213	0.0134697	0.788146	0.0176318	0.127253	0.0137864	0.00429165	0.00761883	0.0087669	0.00413443
0.00567274	0.00611897	0.002519	0.0130401	0.890776	0.00699792	0.0438895	0.00880396	0.00397182	0.00601446	0.0085667	0.00362919
0.00616474	0.0036671	0.00314047	0.0112333	0.910655	0.00766389	0.025519	0.00934798	0.00447083	0.00598981	0.00887302	0.00327445
0.00729469	0.00421389	0.00319775	0.0105544	0.842292	0.00529478	0.0884421	0.01525	0.00449568	0.00696276	0.00911753	0.00288413
0.000987056	0.400518	0.0958084	0.0560012	0.143851	0.00386642	0.0297793	0.0813159	0.0332251	0.0539584	0.00515149	0.0955381
0.00546631	0.00621589	0.00222327	0.013068	0.866594	0.00759856	0.0646116	0.00959388	0.00378656	0.00817507	0.00855366	0.00411284
0.00489325	0.00505904	0.000927266	0.00979783	0.816686	0.0185381	0.1093	0.0116408	0.00234976	0.0117493	0.00677932	0.00227978
0.0064649	0.00590449	0.00231133	0.0159366	0.87536	0.010137	0.0552067	0.00806569	0.00383497	0.00544082	0.00783326	0.00350443
0.00824237	0.00496587	0.00257221	0.012421	0.883392	0.0178277	0.0374601	0.010394	0.00438698	0.00613658	0.00871433	0.00348673
0.00914404	0.0025996	0.00145796	0.0306092	0.854125	0.00825449	0.0550931	0.0144733	0.00480415	0.00743766	0.00889526	0.00310608
0.00605311	0.00547246	0.00247726	0.0215722	0.887932	0.00643406	0.0424595	0.00685074	0.00389594	0.00526807	0.00814974	0.00343523
0.00686897	0.00516265	0.00060511	0.0169456	0.645453	0.0617807	0.208325	0.0276774	0.00192341	0.0161824	0.00509434	0.0039812
0.00887125	0.00941306	0.00140275	0.0280469	0.69563	0.00830793	0.203137	0.0288166	0.00236477	0.00735733	0.00325157	0.00339992
0.00673828	0.00453826	0.00273727	0.0451529	0.867311	0.00716931	0.0311957	0.0113526	0.00459517	0.00713183	0.0086256	0.0034524
0.00620062	0.00621495	0.00234051	0.0288364	0.879926	0.0100912	0.0363529	0.00735089	0.00418598	0.00643157	0.00859912	0.00346973
0.00588856	0.00648495	0.00349679	0.00944485	0.861482	0.0185208	0.0607862	0.00798181	0.0044027	0.00683238	0.0114042	0.00327487
0.00628228	0.00551503	0.00223133	0.0158569	0.874307	0.0138632	0.0510832	0.00979069	0.00399671	0.00551202	0.00817065	0.00339066
0.0340172	0.0338382	0.00241259	0.115265	0.658996	0.0131969	0.0803131	0.00936808	0.00371309	0.0285739	0.0146218	0.0056837
0.00619536	0.00499158	0.00247336	0.0177257	0.880241	0.00721951	0.0540463	0.00678668	0.00358387	0.00540068	0.00792572	0.00341035
0.00408154	0.0040816	0.00356224	0.00700171	0.749405	0.0628177	0.0747824	0.0366735	0.00444733	0.0423792	0.00767881	0.00308869
0.00616935	0.00462854	0.00194708	0.0281497	0.809655	0.0063837	0.11472	0.00822015	0.00369256	0.00444485	0.00816491	0.00382396
0.00465062	0.0147252	0.00243469	0.0168177	0.830534	0.00676422	0.0928528	0.0118726	0.00320768	0.00587017	0.00646209	0.00380803
0.00752161	0.00463023	0.00238031	0.0676083	0.818915	0.00694052	0.0604264	0.00969207	0.0045208	0.0057127	0.0081406	0.00351153
0.00627878	0.00416041	0.00229433	0.00324098	0.865815	0.0259424	0.050426	0.0119054	0.00329545	0.0147294	0.00856623	0.00334571
0.0223874	0.00100558	0.00648692	0.00463548	0.523683	0.0554707	0.04013	0.0151757	0.0132238	0.251618	0.0651008	0.00108284
0.0118351	0.0658269	0.00140175	0.0602718	0.465225	0.0204592	0.265918	0.0624782	0.00679714	0.0232118	0.0084972	0.00807835
0.00461958	0.00400012	0.00488722	0.0179232	0.888502	0.0124201	0.0200642	0.0210715	0.00411043	0.0102894	0.00814171	0.00397046
0.0054337	0.00719047	0.00269424	0.0255446	0.877623	0.0055883	0.0449419	0.00839108	0.00484238	0.00572813	0.00845094	0.00357172
0.00476992	0.0124129	0.00150407	0.00841598	0.804203	0.0152316	0.11641	0.0132331	0.00334686	0.00974467	0.00665903	0.00406885
0.00631475	0.00644833	0.00241187	0.0102345	0.863593	0.0460005	0.0324963	0.00989528	0.00433774	0.00626191	0.00857828	0.00342741
0.00487569	0.00782035	0.00312558	0.0131121	0.870162	0.00644243	0.0626	0.00982982	0.00336039	0.00690567	0.00802502	0.00374057
0.00684253	0.00576043	0.00198644	0.0140821	0.859462	0.00633908	0.0728113	0.00983868	0.00418371	0.00652325	0.00835139	0.00381911
0.00472834	0.0919818	0.0419815	0.071867	0.567409	0.00847296	0.149138	0.0405697	0.00504637	0.00942848	0.00666487	0.0027123
0.00586991	0.00569206	0.00237982	0.014584	0.891777	0.0060847	0.044025	0.00795855	0.00402764	0.0057774	0.00828189	0.00354169
0.00686558	0.00605101	0.0021334	0.0119838	0.871354	0.00990067	0.0583399	0.0104799	0.00445291	0.006024	0.00881803	0.00359662
0.00486969	0.00796713	0.00262285	0.0294416	0.852459	0.0082699	0.0635792	0.0120003	0.00367027	0.00478579	0.00690594	0.00342824
0.00622353	0.00573342	0.002314	0.00954632	0.877158	0.00748254	0.0614605	0.00799377	0.00380849	0.00642472	0.00829976	0.00355465
0.0127529	0.00151245	0.00151276	0.01317	0.754744	0.0157451	0.172267	0.0139939	0.000968626	0.00688356	0.00388793	0.00256101
0.00623466	0.00545991	0.00243257	0.013394	0.898885	0.00645164	0.0379492	0.00737766	0.00433437	0.00542213	0.00858387	0.0034746
0.0364706	0.00313607	0.000481642	0.00692725	0.645995	0.0193612	0.219858	0.026476	0.00219884	0.0213469	0.012917	0.00483216
0.00569047	0.00519117	0.00187244	0.00808345	0.888724	0.00754552	0.0513282	0.0083726	0.00347214	0.00793496	0.00842444	0.00336033
0.327305	0.00300573	0.000356731	0.0386696	0.263499	0.0666808	0.119941	0.0743377	0.00542557	0.0677149	0.0286915	0.00437275
0.00626842	0.00647646	0.00210443	0.0237814	0.845728	0.00696434	0.0797271	0.00887776	0.00369619	0.00503114	0.007639	0.00370568
0.00451789	0.00629382	0.00524451	0.269001	0.435646	0.0533522	0.196759	0.0129459	0.00365395	0.00476752	0.00512164	0.00269772
0.00549919	0.00474784	0.000768289	0.00377497	0.812257	0.0157443	0.101322	0.017723	0.00206408	0.0268816	0.00667137	0.00254622
0.00460976	0.00936042	0.00198124	0.0457702	0.816985	0.00421279	0.0913773	0.00681003	0.00439043	0.00405919	0.00675626	0.00368703
0.00525201	0.0943239	0.164299	0.19104	0.053134	0.00355867	0.285795	0.0127222	0.0861655	0.0323992	0.00652417	0.0647858
0.00713351	0.00381318	0.00271205	0.00876102	0.81531	0.00944711	0.0926778	0.00984727	0.0038575	0.0093265	0.0338401	0.00327424
0.00598656	0.00550862	0.00248583	0.0099607	0.886747	0.00597402	0.0496654	0.0105694	0.00379322	0.00700243	0.00865182	0.00365517
0.00678439	0.00435304	0.00244369	0.0188491	0.887568	0.00663299	0.0453903	0.00719987	0.00394053	0.00559331	0.00788803	0.0033568
0.00613157	0.00545102	0.00237631	0.0106413	0.859626	0.0149866	0.0717736	0.00818465	0.00352528	0.00569282	0.00819853	0.00341247
0.00578504	0.00489115	0.00216509	0.0124072	0.879309	0.00531338	0.0594681	0.00887935	0.00389859	0.00571309	0.00861064	0.00355936
0.00544178	0.00357356	0.00417633	0.0210794	0.801935	0.0936134	0.0195445	0.0262083	0.00399018	0.00895024	0.00817842	0.00330906
0.00621703	0.0056532	0.00244934	0.00914368	0.886874	0.0110929	0.0477301	0.00924014	0.00362535	0.00629478	0.00829918	0.00338
0.00573665	0.00641132	0.00235867	0.0392427	0.866263	0.00788472	0.0428557	0.00768306	0.00372331	0.00593635	0.00841655	0.00348781
0.00529716	0.00842479	0.0023634	0.0230634	0.81599	0.011079	0.0882124	0.0258748	0.00348812	0.0051516	0.00750434	0.00355088
0.00669466	0.00642175	0.00211622	0.0134641	0.874054	0.00696155	0.0635335	0.00749253	0.0040122	0.00435339	0.00784828	0.00304755
0.00534569	0.0074122	0.00222792	0.00394217	0.843163	0.0085351	0.0922035	0.0106236	0.00347647	0.0113047	0.00836073	0.00340497
0.011353	0.0099211	0.000960387	0.0158837	0.695434	0.0142841	0.202881	0.0217814	0.00505022	0.00895899	0.00679979	0.00669252
0.00775469	0.0038934	0.00121249	0.0157579	0.728737	0.0217899	0.181102	0.0150828	0.00360112	0.0104586	0.00687255	0.00373748
0.00682171	0.00723316	0.00221521	0.0165285	0.841641	0.00803111	0.0852567	0.0120979	0.00359268	0.00543995	0.00734855	0.0037931
0.00634786	0.00543383	0.00268778	0.0196298	0.833062	0.00432776	0.0977806	0.00960065	0.00431115	0.00580323	0.00760313	0.00341213
0.00556154	0.00870773	0.00166566	0.0109594	0.82772	0.0085572	0.106425	0.00792208	0.00278534	0.00863276	0.00727087	0.00379246
0.00599351	0.00514496	0.00242156	0.0178731	0.851772	0.00930633	0.0695127	0.0140864	0.00401864	0.00800083	0.00824495	0.0036248
0.00620248	0.0055923	0.00250502	0.0211592	0.883144	0.00789981	0.0455745	0.00650433	0.00382687	0.0056802	0.0084758	0.00343542
0.00615619	0.00455716	0.00281467	0.0108634	0.880183	0.00830104	0.0513822	0.0140347	0.00385825	0.00614013	0.00839005	0.00331925
0.00560382	0.00603718	0.00240487	0.0249047	0.869895	0.00639689	0.056791	0.00794543	0.00334396	0.00518922	0.00803156	0.00345599
0.00705541	0.00517715	0.00236764	0.0105415	0.887593	0.00698433	0.0484287	0.0102466	0.00413203	0.00591428	0.00821281	0.00334627
0.00664419	0.0041677	0.00258279	0.0113923	0.896197	0.0147055	0.0330324	0.00941754	0.00394523	0.00564442	0.00890316	0.00336792
0.00606101	0.008098	0.00179811	0.0529532	0.724953	0.025013	0.141966	0.0128534	0.00366459	0.00729746	0.0111267	0.00421637
0.00601301	0.00567955	0.00241232	0.0126743	0.882321	0.00774268	0.0540111	0.00754164	0.00385195	0.00602111	0.00830091	0.00343083
0.00560948	0.00530801	0.00261725	0.0132285	0.890368	0.00623747	0.0472767	0.00889938	0.00384415	0.00541265	0.00799502	0.00320363
0.00566233	0.00697985	0.00242554	0.0202691	0.852496	0.00745882	0.0731679	0.00935668	0.00385701	0.00654311	0.00778201	0.00400128
0.00742857	0.00397141	0.00145137	0.014571	0.84941	0.00695489	0.0753772	0.0159812	0.00472248	0.00814747	0.00864199	0.00334261
0.00505348	0.0080618	0.00185927	0.00688121	0.850054	0.0106673	0.0822475	0.0112217	0.00344163	0.00905432	0.0076484	0.00380928
0.00625956	0.00581498	0.00234324	0.0125601	0.884111	0.00552711	0.053192	0.00773829	0.00416955	0.00617657	0.00864201	0.00346514
0.00492724	0.0675688	0.000430044	0.148809	0.533335	0.0150028	0.203286	0.00709047	0.00212821	0.00762833	0.00677297	0.00302097
0.00543353	0.00643586	0.00258093	0.0181592	0.892046	0.0104102	0.037733	0.00677838	0.00421712	0.00476312	0.00798418	0.00345842
0.00614608	0.00549905	0.00247983	0.00923241	0.896682	0.00733621	0.0406227	0.0087445	0.00407059	0.0071281	0.00867387	0.00338432
0.00597857	0.00565837	0.00233562	0.00937496	0.874495	0.00961227	0.0604153	0.00823612	0.00409746	0.00714257	0.00851346	0.0041405
0.00637675	0.00528522	0.00242649	0.0116601	0.900856	0.00651178	0.0369893	0.00777107	0.00408668	0.00612693	0.008499	0.00341073
0.00510801	0.00701798	0.00183847	0.00808209	0.853546	0.00761142	0.0811194	0.00968509	0.00311769	0.0112834	0.00827076	0.00332003
0.00658716	0.00695806	0.00252794	0.028796	0.823446	0.0141581	0.0810615	0.0175887	0.00451698	0.00467794	0.00705662	0.00262524
0.00655213	0.00458631	0.00279828	0.0101635	0.895472	0.00612428	0.0431542	0.00860025	0.00393404	0.00616705	0.00889348	0.00355452
0.0605144	0.00967527	0.0418517	0.132958	0.168564	0.0593341	0.20438	0.0804084	0.0544993	0.0669206	0.107724	0.0131694
0.00627698	0.00950065	0.00223227	0.0136187	0.779535	0.0236497	0.0983649	0.0447248	0.00389082	0.00635147	0.00777227	0.0040826
0.00425675	0.00810071	0.00291219	0.00773085	0.880367	0.00761076	0.054473	0.0120715	0.00337885	0.00718151	0.00799529	0.00392139
0.00666599	0.00395905	0.00245378	0.012504	0.900018	0.00531478	0.0389646	0.00791247	0.00394468	0.00637508	0.00841493	0.00347281
0.00736541	0.00536184	0.00206398	0.0518365	0.817841	0.0101786	0.0685335	0.0153995	0.00411508	0.00595435	0.00784216	0.00350777
0.00449122	0.00781273	0.00229649	0.0175779	0.807897	0.0608873	0.0593937	0.00981406	0.00367621	0.0152584	0.00744242	0.00345245
0.204157	0.00817548	0.00206409	0.0643576	0.228056	0.0527999	0.0752572	0.0784765	0.00652496	0.225887	0.0474028	0.00684243
0.00552904	0.00336618	0.0032325	0.0125796	0.886074	0.0294144	0.0265338	0.00947256	0.00415442	0.00776046	0.00826629	0.00361683
0.00608077	0.00560737	0.00265321	0.014032	0.870778	0.00522505	0.0621251	0.0107599	0.00429695	0.00634204	0.00876955	0.00333045
0.00447713	0.00429735	0.00288194	0.0322631	0.855619	0.0256474	0.0305981	0.0180872	0.00431214	0.0103258	0.00913041	0.00235998
0.00554288	0.0060781	0.00213929	0.00887564	0.892594	0.00769119	0.0473345	0.00777558	0.00321903	0.00757354	0.00776377	0.00341207
0.00638177	0.0046413	0.00291649	0.0188925	0.909205	0.00627974	0.0195583	0.0077966	0.00470906	0.00716117	0.0090078	0.00345051
0.00865334	0.0025022	0.00181681	0.0190855	0.78251	0.0372595	0.109606	0.0161417	0.00398329	0.0071572	0.00772894	0.00355555
0.00468319	0.00893143	0.00138308	0.0159311	0.792923	0.0155356	0.127819	0.00819651	0.00374869	0.00940778	0.00709167	0.00434864
0.005551	0.00914415	0.00214899	0.0172611	0.829743	0.018959	0.0842374	0.0116285	0.00418447	0.0058453	0.00754837	0.00374928
0.0103358	0.00139241	0.00120305	0.0349925	0.771603	0.0218977	0.134881	0.00727197	0.00236736	0.00553898	0.00555619	0.00296026
0.00652395	0.0054733	0.0024732	0.0233245	0.869463	0.00713645	0.0554799	0.00840837	0.00435677	0.00605399	0.00823571	0.00307113
0.00578867	0.00222037	0.0029671	0.00720411	0.874307	0.0411922	0.0243484	0.0116146	0.00462406	0.0136571	0.00889078	0.0031859
0.00698656	0.00599147	0.00240558	0.0295152	0.854782	0.00782665	0.0619319	0.00886974	0.0041187	0.00669563	0.00748373	0.00339232
0.00349636	0.00335923	0.0768815	0.00377642	0.658281	0.011813	0.165082	0.011152	0.0309019	0.0224166	0.011044	0.00179557
0.00699569	0.0038602	0.00210963	0.0163782	0.839438	0.0229618	0.0767458	0.0111298	0.00393248	0.00570056	0.00773866	0.00300947
0.00591846	0.00327979	0.00320698	0.0105563	0.67958	0.0180339	0.0752873	0.0335763	0.00381957	0.154938	0.00823365	0.00356879
0.00571215	0.00583192	0.00265004	0.045772	0.859189	0.0124411	0.0356454	0.00800644	0.00422962	0.00779457	0.00886854	0.00385895
0.0048538	0.00742665	0.010635	0.146619	0.737337	0.00789757	0.0591349	0.00788392	0.00270434	0.00564966	0.00703283	0.0028254
0.00512961	0.00624043	0.00215914	0.0125492	0.845502	0.0206799	0.0750213	0.00816285	0.00350079	0.00887159	0.00877935	0.0034036
0.00526399	0.00532088	0.00106359	0.0134544	0.831269	0.0116914	0.0996823	0.00581613	0.00265481	0.0130971	0.00791155	0.00277533
0.00558293	0.00787924	0.00382567	0.0287094	0.709744	0.0318198	0.106184	0.0823159	0.00385522	0.00894939	0.00754507	0.00358942
0.00630103	0.0325567	0.00466063	0.104273	0.589867	0.00587556	0.23497	0.00583649	0.00266217	0.00438979	0.00500071	0.00360762
0.00631592	0.00746635	0.00336978	0.0770759	0.737155	0.0544248	0.0777327	0.0119217	0.00379379	0.00533185	0.0114819	0.00392989
0.00715178	0.00354923	0.00279028	0.00801895	0.89498	0.00946045	0.0397745	0.00881386	0.00355086	0.00667949	0.0119129	0.00331807
0.00426467	0.00898679	0.00302565	0.0293688	0.69337	0.184389	0.0452081	0.0147571	0.00318755	0.00422949	0.00619204	0.00302023
0.00500563	0.00133108	0.0169715	0.0125814	0.667109	0.0435992	0.0596004	0.0056355	0.00249651	0.00329005	0.00678588	0.175594
0.00542854	0.00761855	0.00233942	0.0731363	0.81906	0.00658518	0.0564589	0.00793895	0.00403699	0.00561669	0.00758397	0.00419612
0.00671236	0.00451442	0.00308294	0.0413661	0.877544	0.00834518	0.029311	0.00793468	0.00338917	0.00584297	0.00873664	0.00322025
0.00525141	0.00914341	0.00272058	0.0138526	0.846691	0.00731503	0.0844873	0.00980019	0.00353229	0.00596679	0.00793073	0.00330848
0.0063872	0.0054747	0.0025994	0.00916711	0.878727	0.0135878	0.0522441	0.00879263	0.0040939	0.00676647	0.00865413	0.00350557
0.00615399	0.00684546	0.00225045	0.0121373	0.87469	0.00645413	0.060802	0.00880275	0.00394102	0.0058844	0.00841632	0.00362248
0.00622011	0.00576486	0.00252585	0.0133508	0.898179	0.00769694	0.0357488	0.0083555	0.004238	0.00592019	0.00857096	0.00342917
0.00526449	0.00734945	0.00249704	0.0127809	0.853515	0.00419838	0.0795841	0.0140815	0.00357405	0.00642842	0.00774126	0.00298502
0.00604386	0.00755447	0.00240568	0.0199512	0.863445	0.0217483	0.0517583	0.00825787	0.00332602	0.00416085	0.00782224	0.00352607
0.010743	0.00638381	0.00114554	0.0286557	0.540664	0.0558778	0.300857	0.0363917	0.00335543	0.00837074	0.00321256	0.00434312
0.0538875	0.00279103	0.000942402	0.0328621	0.57798	0.0362944	0.205864	0.0279121	0.00554285	0.0153212	0.0350038	0.00559863
0.00583374	0.00598882	0.00260618	0.00772184	0.8671	0.00584621	0.0713849	0.00983172	0.00401651	0.00726898	0.00850318	0.00389827
0.0133177	0.00539347	0.000383049	0.0609127	0.57089	0.0153155	0.274626	0.0238968	0.00247228	0.0181108	0.00900588	0.00567593
0.0221875	0.00470667	0.00135531	0.0147627	0.7568	0.0107885	0.142223	0.0129928	0.00268467	0.00795376	0.020196	0.00334927
0.00622186	0.00764841	0.00205029	0.0261054	0.840044	0.00662329	0.0810237	0.00900896	0.00425668	0.00501334	0.00826938	0.00373436
0.00626992	0.00537365	0.00231685	0.0133949	0.877616	0.0186558	0.0474875	0.00710529	0.00367638	0.00618524	0.00832035	0.00359857
0.0048377	0.0729998	0.00319418	0.045717	0.618963	0.00655711	0.163205	0.0519668	0.00661155	0.0117393	0.00848538	0.00572344
0.0657703	0.00599799	0.00309756	0.0213387	0.633617	0.0172653	0.0782436	0.141916	0.00416528	0.0189518	0.00751791	0.00211785
0.00584796	0.00767167	0.00205089	0.0218529	0.828073	0.00585902	0.100576	0.00854592	0.00369948	0.00536408	0.00718943	0.00326908
0.00440027	0.0189917	0.00173893	0.00705592	0.768439	0.007697	0.145799	0.017215	0.00356247	0.0128353	0.00778478	0.00448035
0.00694105	0.00665546	0.00208911	0.019831	0.833919	0.0113203	0.0864842	0.0096677	0.00397538	0.00632574	0.00865869	0.00413191
0.00321571	0.0105714	0.21312	0.00795761	0.470572	0.0256498	0.0742158	0.0403605	0	0.149222	0.00470688	0.000409145
0.0057411	0.00883299	0.00199293	0.0109746	0.870686	0.00769048	0.0629576	0.00891321	0.0038197	0.00704612	0.0075415	0.00380401
0.00890879	0.00215717	0.00147414	0.0178577	0.853352	0.00831336	0.0648368	0.0169275	0.00563877	0.00798815	0.009456	0.00309016
0.00626202	0.00467234	0.00265981	0.0127178	0.880212	0.00623577	0.0591228	0.00812297	0.00357001	0.00501654	0.00812726	0.00328034
0.00804955	0.00439903	0.000440761	0.0254028	0.463415	0.0778604	0.392514	0.0173846	0.000738861	0.00453066	0.0023018	0.0029618
0.0063255	0.00565159	0.00254586	0.0175003	0.873535	0.00569445	0.0613037	0.00708412	0.00379992	0.0055666	0.00771287	0.00327987
0.00613292	0.00624185	0.00253968	0.0140151	0.901945	0.00570416	0.0313572	0.00829259	0.00466251	0.00659549	0.00887481	0.00363852
0.0065852	0.00772252	0.00191445	0.0119076	0.751226	0.0453494	0.146519	0.00950489	0.00248792	0.00677746	0.00685683	0.00314845
0.00450504	0.106399	0.00318221	0.0649049	0.585559	0.00348539	0.187736	0.0218317	0.00264122	0.0113593	0.00463644	0.00375952
0.00645682	0.00553159	0.00248743	0.0141049	0.89172	0.00526212	0.0473285	0.00659209	0.00356575	0.00546368	0.00806032	0.00342651
0.00413607	0.0101713	0.00347237	0.0221168	0.779845	0.0225374	0.114282	0.0131106	0.00417927	0.0152155	0.00753427	0.00339949
0.00631233	0.00371883	0.00263982	0.0166248	0.891963	0.00823057	0.0427864	0.00826819	0.00342653	0.00496576	0.00769998	0.00336382
0.00701861	0.00531813	0.0021415	0.0100132	0.828216	0.00746882	0.101873	0.0127611	0.00362554	0.00694059	0.0111312	0.00349287
0.121998	0.00208016	0.00165041	0.0141473	0.52189	0.0211995	0.193585	0.0479248	0.00317602	0.0197588	0.0488305	0.00375984
0.00579364	0.00611508	0.00256091	0.0157196	0.863887	0.0102077	0.0659788	0.00846255	0.00432909	0.00555636	0.0079845	0.00340533
0.00697622	0.0113577	0.00566086	0.199832	0.535178	0.00306474	0.220752	0.00783008	0.0012288	0.00318999	0.00305425	0.00187618
0.00556191	0.00603832	0.002165	0.0374944	0.879875	0.00478821	0.038052	0.00663525	0.00423984	0.00369053	0.00782152	0.00363823
0.0046284	0.008466	0.00222833	0.0268096	0.869427	0.00607537	0.050988	0.0100035	0.00485899	0.00468283	0.00871847	0.00311391
0.00421108	0.0137579	0.00170466	0.0160435	0.802821	0.00545785	0.125074	0.0101413	0.00265059	0.00840912	0.00683984	0.00288876
0.00574763	0.0237402	0.00195554	0.0116725	0.77527	0.00787372	0.144572	0.010127	0.00355408	0.00545519	0.00654488	0.00348726
0.00555989	0.00743033	0.00192456	0.0136897	0.852333	0.00816587	0.0779992	0.0115573	0.00318815	0.00615925	0.00739722	0.00459576
0.00601132	0.00562628	0.00223451	0.0113086	0.890112	0.00731768	0.0477671	0.00796089	0.00356248	0.00653894	0.00833915	0.00322132
0.00430153	0.000864332	0.00179065	0.0549761	0.786205	0.0261735	0.0391201	0.00556848	0.00212566	0.0677028	0.00786523	0.00330646
0.00459797	0.00962413	0.00197263	0.0273494	0.831896	0.00876006	0.0851915	0.00809428	0.00430899	0.00688882	0.00701396	0.00430195
0.00609601	0.0118572	0.00221752	0.0134183	0.839248	0.0079738	0.055583	0.0246915	0.0046659	0.019833	0.00879051	0.00562553
0.00630326	0.00548487	0.0375202	0.0212169	0.678703	0.185368	0.0402866	0.00617184	0.00428351	0.0045645	0.00752336	0.00257361
0.0060662	0.00352107	0.00258936	0.00764989	0.858296	0.0587136	0.0287891	0.00996597	0.00411641	0.00860774	0.00888136	0.00280297
0.0186101	0.0138793	0.00122211	0.0476855	0.576207	0.0135868	0.169847	0.0560913	0.0107942	0.0182604	0.028117	0.0456993
0.00503269	0.0220774	0.015317	0.0243296	0.709572	0.0200347	0.0635966	0.0155607	0.00791408	0.0174392	0.0336774	0.0654489
0.00606949	0.00602459	0.00231894	0.0180383	0.891086	0.00538136	0.0420491	0.00796705	0.00389767	0.00551964	0.00824516	0.00340219
0.00919913	0.00311429	0.00241189	0.0276455	0.481895	0.0376067	0.235616	0.0322124	0.0042798	0.153703	0.00802239	0.00429346
0.00522855	0.00121767	0.0363651	0.0120015	0.609458	0.00714664	0.139627	0.00468338	0.000503581	0.00539169	0.156781	0.0215955
0.00598177	0.00270722	0.0036865	0.0209157	0.845026	0.0149809	0.0681689	0.00843553	0.0044662	0.0107911	0.0101674	0.00467309
0.00675248	0.00425625	0.00175015	0.0365797	0.862603	0.00648551	0.0530982	0.00823302	0.00382758	0.00512016	0.00776306	0.00353125
0.0050714	0.0070498	0.00239363	0.0289386	0.84631	0.00857807	0.072914	0.00877005	0.00328325	0.00657559	0.00649701	0.00361903
0.0065727	0.0047854	0.00271154	0.00912513	0.860584	0.00982604	0.0789173	0.00752479	0.00337876	0.00462832	0.00905054	0.00289541
0.00621086	0.00550883	0.00248134	0.0168296	0.898652	0.00538338	0.0350111	0.00807112	0.0041193	0.00579469	0.00853807	0.00339939
0.00607776	0.0140322	0.00193283	0.0111018	0.778791	0.011898	0.143424	0.00998526	0.0032666	0.00673035	0.00835118	0.00440856
0.00626172	0.00442677	0.00333403	0.0114883	0.895721	0.0121914	0.0302188	0.0102793	0.00456465	0.00831678	0.0107911	0.00240582
0.00590155	0.00522868	0.00193347	0.00851798	0.844788	0.0110632	0.0918609	0.00865248	0.00319302	0.0079435	0.00772124	0.0031955
0.00385226	0.0203692	0.0023083	0.0560196	0.737104	0.00941467	0.113106	0.0365678	0.00313959	0.00730402	0.00689801	0.00391638
0.00633069	0.00814286	0.00222361	0.010234	0.855693	0.018087	0.0672062	0.00921252	0.00429663	0.00603737	0.00943956	0.0030962
0.00374497	0.00230334	0.00601154	0.0152159	0.864716	0.0093958	0.0688728	0.0102153	0.00442442	0.00433334	0.00786049	0.00290646
0.272019	0.00308065	0.00150465	0.0916065	0.255758	0.0615951	0.0722251	0.039059	0.00436794	0.0991297	0.0928064	0.00684854
0.00604067	0.00649475	0.00221996	0.0161849	0.887431	0.011684	0.0397568	0.00883212	0.00407101	0.00560078	0.00808735	0.00359702
0.00661083	0.00515782	0.00237508	0.0087786	0.885754	0.00569847	0.0509481	0.0116162	0.00402216	0.00666684	0.00902486	0.00334702
0.00583119	0.00779567	0.00273205	0.0142189	0.663083	0.0068037	0.272239	0.0130169	0.00327523	0.00306643	0.0057737	0.00216485
0.00406609	0.00220813	0.0157228	0.0367417	0.831176	0.0107112	0.0106759	0.047088	0.00910182	0.0160819	0.0124892	0.00393764
0.00542225	0.0124246	0.00450956	0.0614627	0.699295	0.00483676	0.151398	0.0393755	0.00402351	0.00748666	0.00612355	0.00364179
0.00545868	0.00742853	0.00178162	0.0267997	0.850208	0.00512178	0.074848	0.00767531	0.00433019	0.00526605	0.00761774	0.00346416
0.00744017	0.00392236	0.00215771	0.0205186	0.887047	0.00857533	0.0430345	0.00773256	0.00397249	0.00489177	0.00745724	0.00325068
0.0085013	0.00527107	0.00201147	0.0435976	0.822912	0.0150806	0.06596	0.0145771	0.00384536	0.00715596	0.00764075	0.00344717
0.00605067	0.00713433	0.00228954	0.0170396	0.856318	0.00540676	0.0756159	0.00820771	0.00406683	0.00607233	0.00790977	0.00388878
0.0066327	0.00122109	0.00176747	0.0115199	0.881603	0.00935752	0.0598002	0.00667402	0.00247972	0.0080357	0.00871091	0.00219753
0.00532226	0.00201457	0.00408944	0.00953404	0.857349	0.0154716	0.0540776	0.0249359	0.00410211	0.010218	0.0101684	0.00271685
0.00644587	0.00455186	0.00234698	0.0142043	0.805572	0.00603569	0.127094	0.00988575	0.00379893	0.00656901	0.009198	0.00429737
0.00639868	0.00159307	0.0108446	0.28229	0.528777	0.109738	0.0206275	0.00843905	0.00779681	0.00838468	0.012475	0.00263577
0.00686811	0.00527777	0.00245592	0.0127155	0.832183	0.00625764	0.102922	0.00856897	0.0045372	0.00635438	0.00878488	0.00307388
0.00583046	0.0268953	0.00375117	0.0393451	0.701478	0.0089249	0.177725	0.00854099	0.00468277	0.00834571	0.00879586	0.00568491
0.00595437	0.00725126	0.0024267	0.0176367	0.877421	0.00844384	0.0528097	0.00770306	0.00427743	0.00497813	0.00784092	0.0032572
0.00448404	0.0063669	0.00571723	0.0127459	0.834727	0.00625012	0.106237	0.00706368	0.001576	0.00419973	0.00784143	0.00279081
0.00637576	0.00576491	0.00228057	0.0134448	0.879518	0.00635122	0.0555523	0.00948879	0.00391309	0.00572611	0.00812896	0.00345536
0.00686185	0.01161	0.00172714	0.0216249	0.760063	0.00671683	0.156682	0.012439	0.00320012	0.007892	0.00693168	0.0042515
0.121353	0.00246631	0.000706078	0.011647	0.49942	0.0361361	0.168851	0.0636245	0.00725552	0.0300347	0.0534463	0.00505998
0.00614455	0.0063265	0.0026007	0.0178521	0.894787	0.0123741	0.0308318	0.00704213	0.00400104	0.00556247	0.00894589	0.00353213
0.00528256	0.00991543	0.00225596	0.0892933	0.646194	0.00633332	0.223705	0.00346469	0.0021218	0.00315871	0.00430998	0.00396557
0.00680852	0.00416454	0.00237742	0.00840017	0.912813	0.00735507	0.0241981	0.00953996	0.00463357	0.00753198	0.00893642	0.00324137
0.00628318	0.00516252	0.00243039	0.0101561	0.891428	0.00552371	0.0450135	0.0115096	0.00399951	0.00629963	0.00883975	0.00335404
0.00550622	0.00273999	0.00251187	0.105761	0.724169	0.0241085	0.0992619	0.0182025	0.00278024	0.00587408	0.00545548	0.00362976
0.00679081	0.00652139	0.00141024	0.00867249	0.767918	0.00959096	0.155143	0.0168289	0.00329033	0.0118376	0.00834195	0.00365412
0.00633224	0.00258727	0.0762663	0.0207177	0.675154	0.0052534	0.176671	0.00838418	0.00842067	0.00761531	0.00940249	0.00319571
0.00915382	0.000956197	0.00564419	0.132878	0.425915	0.0370012	0.358798	0.00999929	0.00261048	0.00786605	0.00743857	0.00173912
0.0055644	0.007189	0.00234667	0.00876635	0.884274	0.00675145	0.0516771	0.0111411	0.00366102	0.00711619	0.00791861	0.00359378
0.00662994	0.00494511	0.00252276	0.0138083	0.901941	0.00560459	0.0347551	0.00731903	0.00429788	0.00613689	0.00855698	0.0034825
0.00599266	0.0055309	0.00248448	0.0100415	0.873628	0.0254037	0.0463406	0.00812216	0.004119	0.00714528	0.00805507	0.00313651
0.00653288	0.00809826	0.00265906	0.0861146	0.791296	0.0062751	0.074285	0.00750165	0.00358063	0.0036441	0.00651952	0.00349277
0.00570665	0.00648199	0.00241426	0.00647548	0.884141	0.00612203	0.0541854	0.00990694	0.0040974	0.00764481	0.00915919	0.00366535
0.00578638	0.00643759	0.00248939	0.0105529	0.89002	0.00506431	0.0492585	0.00853262	0.00372417	0.00618398	0.00845005	0.00349964
0.00318102	0.0774788	0.00198699	0.0643797	0.57504	0.0101643	0.22921	0.0216284	0.00352229	0.00574308	0.00320005	0.00446571
0.00488465	0.00277673	0.0021709	0.0484414	0.737544	0.0881002	0.0858734	0.00585983	0.00562665	0.00845849	0.00708563	0.0031777
0.0110212	0.0138244	0.00242948	0.062429	0.455396	0.0184539	0.244354	0.0475874	0.00514958	0.0385668	0.0927539	0.00803434
0.005229	0.0077422	0.00225982	0.037364	0.848176	0.00736762	0.0572798	0.00990032	0.00415391	0.00804185	0.00861329	0.00387181
0.00626257	0.00579611	0.00284425	0.00921095	0.884713	0.00950747	0.0467774	0.00918676	0.00425336	0.0082492	0.0092518	0.00394686
0.00692702	0.00428661	0.00606903	0.0108278	0.800466	0.0112602	0.100165	0.0127924	0.00491388	0.0152849	0.0221323	0.00487431
0.0159736	0.00571069	0.0039867	0.0500193	0.626648	0.0631289	0.11693	0.0465611	0.0107313	0.0158852	0.0400923	0.00433311
0.00375229	0.0047717	0.0077963	0.01521	0.871645	0.0102717	0.0482689	0.0135417	0.00554741	0.00731176	0.00918775	0.00269512
0.00528339	0.00408743	0.00450416	0.0102035	0.875006	0.0153082	0.0483261	0.0115171	0.00402337	0.00819411	0.00956744	0.00397933
0.00265783	0.136752	0.00447841	0.213985	0.435053	0.00856007	0.0945754	0.0777508	0.0118163	0.00470892	0.00322483	0.00643728
0.00675566	0.00524466	0.00278484	0.00933628	0.897888	0.0177181	0.026442	0.00963183	0.00469975	0.00683594	0.00928683	0.00337591
0.00482578	0.00604841	0.00266988	0.0126271	0.8315	0.00870766	0.0927323	0.0192174	0.00393326	0.00674026	0.0077093	0.003289
0.00562449	0.0013747	0.00220171	0.0691635	0.8331	0.0243667	0.0369196	0.00866411	0.00513711	0.00232673	0.00879027	0.00233154
0.00541873	0.00156137	0.00324283	0.103471	0.761054	0.00757519	0.0942924	0.00388764	0.00319781	0.00432382	0.00687762	0.00509719
0.0056409	0.00874941	0.00199434	0.02203	0.839899	0.0125768	0.078566	0.0085099	0.00460906	0.00569638	0.00828331	0.00344469
0.00324088	0.455574	0.0282924	0.0813034	0.0368536	0.00379091	0.0231432	0.0754355	0.0187854	0.0108153	0.0140038	0.248761
0.00553405	0.00141458	0.00427033	0.0108364	0.902421	0.0204222	0.0185457	0.00983435	0.00436115	0.00943416	0.00981317	0.00311321
0.00538961	0.0717134	0.00454929	0.10191	0.614797	0.0386363	0.114948	0.0261368	0.00494379	0.00413534	0.00265559	0.0101852
0.00500576	0.00212188	0.00435035	0.0165612	0.818193	0.0883554	0.0126365	0.0232752	0.00282496	0.0161579	0.00897245	0.0015453
0.00500728	0.0114402	0.00248465	0.0615714	0.690034	0.0259076	0.15548	0.0303241	0.00279173	0.00424924	0.0074712	0.00323803
0.00634833	0.00559487	0.00258246	0.0125442	0.835687	0.00952968	0.0997855	0.00678605	0.00359715	0.00633944	0.00801659	0.00318845
0.00406767	0.030117	0.00474626	0.0212537	0.660543	0.00536146	0.223543	0.0147779	0.00361576	0.0165828	0.0103728	0.00501867
0.00537071	0.00263735	0.0031139	0.00926932	0.908136	0.00732932	0.0233414	0.0125866	0.00444042	0.00916415	0.0111028	0.00350822
0.00486241	0.0146595	0.00367576	0.0632685	0.628714	0.00636813	0.218932	0.0413433	0.00352491	0.00566528	0.00504583	0.00394107
0.00516215	0.00882144	0.00241384	0.008404	0.858483	0.00986253	0.0627952	0.019756	0.0042663	0.00800908	0.0084268	0.00359954
0.00648298	0.00446492	0.00282767	0.00968147	0.9086	0.00781454	0.0286016	0.00867142	0.00388508	0.00626256	0.00966141	0.00304599
0.0211188	0.000663588	0.00174613	0.0110747	0.672593	0.0199588	0.147925	0.0865884	0.00530475	0.0146359	0.0159746	0.00241599
0.00555574	0.0026273	0.00394913	0.0110794	0.91319	0.00978087	0.0214735	0.0115472	0.00360389	0.00537003	0.00881077	0.00301182
0.00631928	0.00886922	0.0024049	0.0177089	0.673544	0.0740998	0.180824	0.013273	0.00329562	0.00616341	0.00879489	0.00470242
0.0056131	0.00718535	0.00280997	0.0140204	0.867741	0.00637854	0.0652869	0.00799404	0.0041666	0.00575249	0.00899146	0.00405988
0.00736257	0.017255	0.000711997	0.0156286	0.659958	0.019222	0.0614635	0.0761361	0.0856907	0.008695	0.00517361	0.0427026
0.0705318	0.00413053	0.00169653	0.00881686	0.650349	0.0415037	0.146409	0.0265486	0.0150636	0.0145702	0.015446	0.00493416
0.00590444	0.00365735	0.00162949	0.07474	0.809931	0.0112833	0.0737653	0.00516694	0.00260891	0.00172957	0.00616587	0.00341773
0.00586823	0.0074233	0.00163243	0.0273691	0.682832	0.01256	0.232413	0.00436326	0.00184443	0.0115546	0.00761748	0.0045221
0.00750613	0.00443717	0.00242762	0.0222019	0.853747	0.00630223	0.0732148	0.00960939	0.00360117	0.00587307	0.00776287	0.00331716
0.00989177	0.00516317	0.00249939	0.00486955	0.814783	0.0314946	0.0984291	0.00991429	0.00335597	0.00701073	0.00928387	0.00330473
0.0048899	0.00551126	0.00268365	0.0178972	0.870187	0.00737553	0.0654613	0.006335	0.00287799	0.00608351	0.007742	0.00295557
0.0073778	0.00635832	0.00180247	0.0263878	0.784066	0.00997351	0.132428	0.0120667	0.00357391	0.00494367	0.00692988	0.0040917
0.00615536	0.00621637	0.00237279	0.0143606	0.891207	0.00596665	0.043982	0.00808401	0.00387892	0.00618592	0.00829407	0.00329636
0.00598594	0.0048271	0.00244227	0.0182846	0.797589	0.0113783	0.128217	0.00940183	0.00362468	0.00661213	0.00811017	0.00352657
0.00272369	0.0333281	0.00494666	0.88047	0.0222963	0.0114741	0.0196362	0.00470863	0.00553883	0.00406938	0.00226988	0.00853853
0.00468223	0.00461657	0.00409572	0.00397167	0.820223	0.0118219	0.0677503	0.00919452	0.00199126	0.0610341	0.00740924	0.00320971
0.00597769	0.0269235	0.00684411	0.159961	0.587248	0.00457944	0.178183	0.0141935	0.00267112	0.00401183	0.00499218	0.00441422
0.0116246	0.00358158	0.00236823	0.00335064	0.820643	0.0108825	0.109248	0.0145463	0.00183878	0.010894	0.00857193	0.00245035
0.0056246	0.0295297	0.0018508	0.0241977	0.661659	0.0243319	0.200627	0.00939268	0.00399269	0.0284376	0.00644602	0.00391047
0.00607735	0.0184726	0.00474015	0.209199	0.546596	0.00712753	0.175738	0.00991389	0.00326535	0.00591387	0.0069554	0.00600137
0.00555243	0.00709726	0.00178199	0.00451956	0.858555	0.0137603	0.0731604	0.0114087	0.00333346	0.00987648	0.0077295	0.00322466
0.00620393	0.00460758	0.00259202	0.0147937	0.904701	0.00606503	0.0291471	0.00818768	0.00433933	0.0071184	0.0088785	0.00336521
0.00206484	0.205006	0.00595097	0.0370604	0.476305	0.00509076	0.217441	0.0199728	0.00501677	0.0161707	0.00605392	0.00386692
0.00615173	0.00438003	0.00217506	0.00638413	0.895555	0.0086731	0.0437669	0.0093498	0.0037743	0.00834531	0.00866659	0.0027777
0.00453106	0.00813644	0.00263406	0.047608	0.693372	0.016177	0.141774	0.0599937	0.00425187	0.0095049	0.00801968	0.00399795
0.00405237	0.0376853	0.172922	0.017888	0.670767	0.00461761	0.0406358	0.0260629	0.00395271	0.0103693	0.00715296	0.00389418
0.00703855	0.00311666	0.00195009	0.0240096	0.751006	0.00991861	0.133345	0.0229748	0.00370603	0.0204177	0.0187762	0.00374027
0.00543857	0.0120893	0.00285846	0.0240931	0.865443	0.0044274	0.0558349	0.0104873	0.0040483	0.00484934	0.00734774	0.00308301
0.00730929	0.00505288	0.00362142	0.0592656	0.618344	0.00735356	0.254069	0.0245727	0.00468391	0.00581752	0.00661603	0.00329375
0.00416014	0.00212252	0.00213893	0.0988352	0.719671	0.0119731	0.135993	0.00550092	0.00324423	0.00659571	0.00676042	0.00300464
0.232857	0.00484023	0.00116096	0.00950997	0.480037	0.0364433	0.203449	0.00642112	0.005825	0.0119224	0.00544697	0.00208702
0.00725004	0.00217084	0.00258824	0.0168741	0.866306	0.0508994	0.0251406	0.00804904	0.00388432	0.00520023	0.00827464	0.00336255
0.00636531	0.00896344	0.00146323	0.0134709	0.736236	0.0120099	0.188469	0.00997525	0.00261956	0.00989711	0.00664003	0.00389077
0.00631086	0.00460202	0.00226512	0.0178679	0.885753	0.0074407	0.0482231	0.00629413	0.0037002	0.00619898	0.00808211	0.00326215
0.0090501	0.00464183	0.00588721	0.129743	0.611003	0.0690417	0.143905	0.0102765	0.00212683	0.00470134	0.00632765	0.00329553
0.00592451	0.00588611	0.00216798	0.019804	0.84583	0.00700395	0.0829082	0.00921423	0.00378101	0.00550475	0.00856918	0.00340601
0.00479292	0.0567493	0.0175616	0.0200852	0.744561	0.0116865	0.0994527	0.0156104	0.00519023	0.0124493	0.00897068	0.00289021
0.00462301	0.00323175	0.00332242	0.0487756	0.77508	0.0546351	0.0732296	0.0101913	0.00349936	0.0103172	0.0108369	0.00225721
0.00724981	0.00457883	0.00455168	0.0121869	0.820756	0.0374845	0.0710907	0.0148963	0.00598903	0.00618517	0.0116757	0.00335569
0.00638316	0.00574081	0.0024101	0.0529669	0.850226	0.00785089	0.0484798	0.00718725	0.00329939	0.00397606	0.00753663	0.00394343
0.00535137	0.00584739	0.00274692	0.0140439	0.881514	0.00987054	0.0470617	0.0101746	0.00403558	0.00725601	0.00870493	0.00339268
0.00666754	0.00529421	0.00301244	0.0283907	0.808422	0.0251511	0.0853135	0.0108537	0.00435153	0.00692906	0.0116785	0.00393562
0.00505377	0.00405889	0.00356377	0.0326709	0.845102	0.00472596	0.0804245	0.00492277	0.00362794	0.0040294	0.00887302	0.00294746
0.00370061	0.00267458	0.00657939	0.00732697	0.837442	0.0258046	0.0251065	0.0647724	0.00497226	0.00777527	0.0106573	0.00318819
0.00574784	0.00621072	0.00260613	0.0114585	0.901891	0.00507272	0.0335936	0.00916128	0.00419258	0.0073912	0.00887905	0.00379517
0.00608995	0.00559895	0.00263538	0.00892574	0.901024	0.00806294	0.0352747	0.00834222	0.00390397	0.00793646	0.00879683	0.00340843
0.0105659	0.00667349	0.00494295	0.0267865	0.509787	0.0649189	0.261356	0.0259183	0.0280765	0.00884693	0.0491098	0.00301778
0.00671646	0.00407524	0.00721722	0.0237178	0.822681	0.0447623	0.03571	0.00777684	0.0146456	0.00570172	0.0241058	0.00289005
0.00374957	0.00878172	0.000108354	0.00772184	0.594113	0.0303699	0.162962	0.0104553	0.000867642	0.173775	0.004756	0.00233895
0.005638	0.00662248	0.00219143	0.0438339	0.839701	0.00850704	0.0628452	0.00734282	0.00361354	0.00731075	0.00847808	0.00391562
0.00677681	0.00449091	0.00270176	0.00980532	0.89974	0.0112184	0.0331429	0.00923769	0.00414431	0.00662741	0.00870497	0.00340948
0.00576411	0.00810697	0.00222255	0.0334361	0.620079	0.0112562	0.286	0.00623912	0.00343317	0.00561696	0.0140438	0.0038027
0.00966596	0.00202802	0.00668202	0.0485909	0.654466	0.0425486	0.160095	0.0123406	0.00330689	0.0113414	0.0436218	0.0053128
0.00543105	0.00020084	0.00909644	0.0359343	0.623125	0.018856	0.24818	0.0219496	0.00941194	0.0126565	0.0139592	0.00119862
0.00590078	0.00764156	0.00235454	0.0263667	0.872351	0.00645473	0.0496931	0.00821965	0.00422743	0.00497773	0.00837545	0.0034373
0.0045079	0.184051	0.0176816	0.0256271	0.593876	0.00364502	0.0919731	0.0131754	0.0470873	0.0062554	0.00851505	0.00360461
0.00631626	0.0068658	0.00225661	0.0462129	0.837172	0.00725221	0.0685628	0.00586035	0.00383853	0.00487238	0.00756353	0.00322659
0.00579128	0.00670639	0.00290019	0.0208019	0.844423	0.00794463	0.0844292	0.00607102	0.00323389	0.00598656	0.00807518	0.0036364
0.00636236	0.00534229	0.00252964	0.0110546	0.900265	0.00832708	0.0354834	0.00803063	0.00418626	0.00647573	0.0085608	0.00338257
0.00690103	0.00217477	0.00228099	0.0607577	0.865066	0.0068883	0.0285365	0.00789933	0.00406689	0.00371845	0.00833766	0.00337233
0.00363879	0.00447892	0.00289099	0.110049	0.695159	0.0438724	0.10235	0.00817356	0.0151185	0.00321621	0.00724605	0.00380725
0.0070723	0.00440662	0.00210781	0.0150267	0.882719	0.0115795	0.0436467	0.0128524	0.00359672	0.00626516	0.00760858	0.00311864
0.263786	0.00595703	0.000983516	0.0603465	0.179648	0.097657	0.172912	0.0748836	0.0220678	0.0470562	0.0678089	0.00689319
0.00592647	0.00763027	0.00210677	0.0202836	0.868424	0.00694271	0.0619817	0.00732722	0.00337898	0.00512627	0.0075802	0.00329207
0.00653494	0.00519554	0.00234201	0.0241925	0.883342	0.00695113	0.042778	0.00712922	0.00406025	0.00536395	0.008756	0.00335491
0.00645246	0.00808378	0.0041231	0.119743	0.647019	0.0362424	0.131802	0.00471987	0.00560658	0.00468792	0.0260012	0.0055197
0.00503662	0.00255304	0.00143487	0.00752733	0.829981	0.0186346	0.0600882	0.00745206	0.00188539	0.054568	0.00788915	0.00294995
0.00554136	0.0136897	0.00199349	0.0850053	0.693821	0.0117887	0.160776	0.00853503	0.0036505	0.00520175	0.00621844	0.00377905
0.00611633	0.00462059	0.0033501	0.00480028	0.90958	0.00630409	0.0278084	0.0118735	0.00391997	0.00893333	0.00946275	0.00323023
0.00446362	0.013308	0.00293857	0.00436762	0.802175	0.00546999	0.116592	0.0221976	0.00355785	0.0143294	0.00803529	0.00256492
0.00602088	0.00596862	0.00254381	0.00858469	0.894713	0.00711386	0.04071	0.00985258	0.00480767	0.0072815	0.00906971	0.00333347
0.00716485	0.00241998	0.0034288	0.0205389	0.903098	0.0104349	0.0275382	0.00719314	0.00364937	0.00434581	0.00769661	0.00249145
0.00509736	0.00770121	0.00190999	0.0067057	0.864888	0.00892919	0.0685744	0.0123922	0.00379389	0.00839562	0.00770394	0.00390852
0.00575207	0.00395044	0.00112629	0.0742861	0.694238	0.0486768	0.0995142	0.0391206	0.00212018	0.00458501	0.0251167	0.0015131
0.0565402	0.00449423	0.00655938	0.0865376	0.15672	0.0413901	0.0777469	0.0415046	0.060927	0.0338152	0.432343	0.00142108
0.0274693	0.0305001	0.00553754	0.0476201	0.108062	0.0620534	0.0293495	0.0520041	0.0608218	0.0331234	0.0370617	0.506397
0.00406296	0.00584419	0.00214503	0.00812772	0.744391	0.040947	0.12191	0.0247254	0.0025559	0.0202129	0.0224098	0.00266826
0.006322	0.00304944	0.00293784	0.0278808	0.641519	0.0587816	0.0975206	0.101984	0.00873615	0.00574617	0.0423403	0.0031824
0.00592263	0.00912764	0.00236546	0.0464046	0.7416	0.00550354	0.168438	0.00582645	0.00308196	0.00339141	0.00530047	0.00303814
0.00631624	0.0675847	0.00465827	0.0126933	0.706854	0.00694555	0.168885	0.0122189	0.0024702	0.00283171	0.00604225	0.00249997
0.00697442	0.00453858	0.00230238	0.0345203	0.820351	0.0110537	0.0943159	0.00596921	0.00295827	0.00541557	0.00790733	0.00369355
0.00588095	0.00104133	0.00492811	0.23046	0.68741	0.0279381	0.0240178	0.00471	0.00211716	0.00237363	0.00607921	0.00304368
0.00386245	0.037514	0.00306413	0.078253	0.205173	0.00670496	0.558651	0.0942352	0.00174066	0.00450766	0.00325253	0.00304159
0.0041166	0.0104749	0.00196696	0.00510754	0.837267	0.0162856	0.0740189	0.0138858	0.00306441	0.0222762	0.0078636	0.0036727
0.00530941	0.00688889	0.00124452	0.00603729	0.826899	0.0120348	0.107227	0.00840953	0.00257794	0.0127434	0.00785739	0.00277042
0.00637854	0.00506774	0.00246964	0.011116	0.909193	0.00520757	0.0297534	0.00829	0.00423584	0.00603939	0.00889127	0.00335758
0.00485157	0.00574994	0.00304398	0.0403253	0.795387	0.00754207	0.101655	0.0136379	0.00355763	0.00521723	0.00894055	0.0100909
0.00613184	0.00783772	0.0022385	0.0446937	0.857541	0.0075823	0.0461775	0.00691434	0.00390924	0.00517448	0.00800192	0.00379751
0.00791858	0.00614702	0.00228834	0.0177947	0.856011	0.0184625	0.0630549	0.00812504	0.00376479	0.00577735	0.00734597	0.0033096
0.00505502	0.0125996	0.00291048	0.0646645	0.818104	0.00470331	0.0594336	0.0101202	0.00471642	0.00629258	0.00734357	0.00405699
0.00786847	0.00249698	0.00138493	0.00544094	0.819893	0.00908822	0.0954056	0.0320048	0.00287177	0.013293	0.00756536	0.00268725
0.00632363	0.00643963	0.00176381	0.0297378	0.787522	0.00886177	0.114801	0.0180875	0.00416955	0.00972734	0.00799211	0.00457443
0.00606827	0.00657315	0.00231876	0.0111299	0.893905	0.00573722	0.04179	0.0100244	0.00402094	0.00641115	0.00862746	0.00339353
0.00488649	0.00504885	0.00269211	0.0579403	0.68973	0.00419498	0.212381	0.00834274	0.00286889	0.00358442	0.00542747	0.00290267
0.00652357	0.00189878	0.00288047	0.0227953	0.884728	0.0135604	0.0240405	0.0114538	0.00333602	0.0157397	0.00976396	0.0032793
0.0473966	0.00483271	0.00156143	0.0236663	0.58661	0.106886	0.140293	0.0611741	0.00459219	0.0124854	0.00621753	0.00428421
0.00551656	0.00933839	0.00225419	0.0122487	0.872133	0.0075718	0.0578434	0.00924544	0.00382605	0.00848196	0.00796326	0.00357721
0.00489103	0.0175385	0.00275565	0.0360583	0.806546	0.00989976	0.0907087	0.00762656	0.00429561	0.00724142	0.00701106	0.00542738
0.00679005	0.0046119	0.00289121	0.0349531	0.874547	0.0193304	0.0242818	0.00866237	0.00419156	0.00714145	0.00912739	0.00347165
0.0769527	0.00388805	0.00057311	0.0331309	0.478219	0.0437424	0.208305	0.0497866	0.00391608	0.0508074	0.0442743	0.00640422
0.00599487	0.0067934	0.00238515	0.0468061	0.855957	0.00899659	0.0435098	0.00735176	0.00384905	0.00605875	0.00847108	0.00382606
0.00378166	0.0177293	0.00331745	0.0112814	0.779691	0.0109553	0.129622	0.0151504	0.00328449	0.0112121	0.0101155	0.00385965
0.00545061	0.0136562	0.00212025	0.0886753	0.675772	0.0509684	0.0774652	0.0179878	0.00483809	0.0520796	0.00611332	0.00487347
0.00542563	0.00135816	0.00184473	0.120161	0.804436	0.0127866	0.0328915	0.00521569	0.00328012	0.00284916	0.00681258	0.00293876
0.00262748	0.0328288	0.00120622	0.067303	0.657845	0.019917	0.178703	0.00949311	0.00135315	0.0207474	0.00184007	0.00613584
0.00375236	0.00315386	0.00306379	0.0309068	0.88899	0.00631389	0.0385715	0.00869666	0.00369322	0.00345997	0.006788	0.00260945
0.00290893	0.0984559	0.00759754	0.00976366	0.289183	0.0239397	0.0129982	0.0340585	0.0262689	0.0107558	0.00402513	0.480045
0.00602809	0.00613086	0.00254907	0.0147332	0.894345	0.00760521	0.0401972	0.0076708	0.00409193	0.00564782	0.00773853	0.00326263
0.00771848	0.0054677	0.00221938	0.00985582	0.838423	0.00790857	0.0967283	0.00897237	0.00326083	0.00643106	0.00942299	0.00359144
0.00320048	0.00205044	0.0027494	0.00757287	0.725971	0.0122718	0.206389	0.0206244	0.000713654	0.00912123	0.00683374	0.00250235
0.00613035	0.00469418	0.0254096	0.0164416	0.753559	0.0122857	0.0551988	0.00588804	0.00329383	0.0224273	0.0513341	0.0433372
0.0077096	0.00330548	0.00201876	0.0116001	0.859005	0.0154257	0.0678079	0.0113565	0.00403858	0.00655596	0.00798561	0.00319108
0.00523406	0.00325568	0.0171521	0.00677498	0.843936	0.0126031	0.0361984	0.00949106	0.00460146	0.00989416	0.0481061	0.00275245
0.00648703	0.0153166	0.00350655	0.0892082	0.616096	0.00928016	0.223025	0.0102496	0.00193008	0.0159984	0.00573051	0.00317194
0.00624714	0.00754594	0.00289361	0.0202117	0.879621	0.0179727	0.0332987	0.0098773	0.00419207	0.00704081	0.00802945	0.00306967
0.00798831	0.0039777	0.00217407	0.0195049	0.823172	0.00987897	0.0995916	0.0112285	0.00370702	0.00720045	0.0079864	0.00359006
0.00618534	0.00569088	0.00295566	0.0170361	0.876219	0.015258	0.0503418	0.0082324	0.00315851	0.00396635	0.00768342	0.00327254
0.0757801	0.00119101	0.000887195	0.0384735	0.616028	0.0904706	0.101226	0.0367587	0.00159489	0.0140114	0.0220275	0.00155135
0.00581553	0.00573298	0.00275445	0.00936939	0.901546	0.00485238	0.0383062	0.00900763	0.00381269	0.00693571	0.00865085	0.00321664
0.00616076	0.00364161	0.00421317	0.0639632	0.820868	0.0207314	0.0581082	0.00477865	0.00250737	0.00418206	0.00730868	0.0035364
0.00604793	0.00590081	0.00234548	0.0136096	0.880775	0.00680327	0.0527698	0.00977367	0.00412817	0.00622032	0.0083262	0.0033001
0.00536959	0.00971649	0.00278121	0.00650961	0.850941	0.0198241	0.0664941	0.0151572	0.00424801	0.00719649	0.00838861	0.00337386
0.00586192	0.00603744	0.00241043	0.0213113	0.868477	0.00607737	0.0602857	0.00842994	0.00404334	0.00582939	0.00794936	0.0032863
0.00666015	0.0282941	0.00392029	0.0516829	0.453047	0.0309865	0.217241	0.0133993	0.0114207	0.0064295	0.17182	0.00509968
0.0051021	0.00851524	0.00254709	0.00984521	0.846442	0.00861369	0.079944	0.0170787	0.00385772	0.00696538	0.00800456	0.0030839
0.00589951	0.00592549	0.00236105	0.019786	0.85114	0.00553686	0.0752861	0.0124036	0.00425612	0.0061405	0.00810368	0.00316073
0.00696179	0.00527599	0.00259325	0.0127587	0.878111	0.00626394	0.0607892	0.00696093	0.00372894	0.0055749	0.0077391	0.00324226
0.00617579	0.00711126	0.00210318	0.0280144	0.873463	0.00548702	0.0512187	0.00764638	0.00335026	0.00421134	0.00761116	0.00360739
0.00671943	0.00645787	0.00216513	0.0091391	0.69389	0.00828036	0.242453	0.00785885	0.00437755	0.00619915	0.00885477	0.00360533
0.0047265	0.00919948	0.0268044	0.42883	0.467226	0.0160475	0.0249214	0.00576122	0.00341244	0.00371743	0.00606005	0.0032944
0.0057609	0.00987244	0.00254737	0.0156122	0.815637	0.023322	0.101057	0.00866724	0.00321622	0.00368093	0.00702609	0.0036008
0.00382925	0.0214608	0.0038465	0.0637651	0.684543	0.00431601	0.191425	0.0117779	0.00384536	0.00291792	0.00637567	0.00189769
0.00496578	0.00708672	0.00225751	0.0057012	0.848518	0.0140465	0.0789303	0.0102053	0.00417133	0.0109556	0.00923032	0.00393166
0.00604179	0.00546899	0.00259412	0.00945465	0.894724	0.00729947	0.0415578	0.0101285	0.0039494	0.00631586	0.00898447	0.00348052
0.00411998	0.0391178	0.00183968	0.119812	0.489716	0.0145365	0.246113	0.0437176	0.00530907	0.0189696	0.0113249	0.00542352
0.00749452	0.00674916	0.00210102	0.00682642	0.788663	0.0198909	0.130643	0.0160285	0.00378515	0.00835915	0.00721609	0.0022432
0.0055156	0.00373744	0.00256681	0.0046097	0.669378	0.0362568	0.225377	0.0213461	0.0035918	0.0150761	0.0101611	0.00238309
0.00583308	0.00430479	0.00246704	0.10999	0.736087	0.00808347	0.106068	0.00689105	0.00324583	0.0049035	0.00787478	0.00425147
0.00603499	0.00191859	0.00589998	0.0153449	0.886584	0.0275804	0.0175023	0.00962375	0.00547064	0.00766392	0.0118463	0.00452989
0.00559911	0.0116439	0.00259889	0.0168271	0.803483	0.027503	0.0958544	0.0171335	0.00322862	0.00689675	0.00636989	0.00286144
0.00598275	0.00515483	0.00223037	0.0292841	0.840382	0.0135315	0.0747158	0.00852108	0.00394823	0.00508067	0.0074112	0.00375789
0.0196529	0.00346117	0.00230775	0.0361814	0.470067	0.0542597	0.28393	0.080138	0.00337123	0.0121177	0.0309655	0.00354685
0.00606521	0.00476933	0.00291847	0.0291434	0.889797	0.0117817	0.0270034	0.00687745	0.00375261	0.00577415	0.00877734	0.00333984
0.00418866	0.0139426	0.00270151	0.0205393	0.878409	0.00615762	0.0383469	0.0118484	0.004962	0.00627572	0.00803814	0.00458988
0.00579587	0.00565613	0.00224366	0.0143098	0.838126	0.0204696	0.0750931	0.0125611	0.00492233	0.00806643	0.00937047	0.00338508
0.00552253	0.0105944	0.00193388	0.0168199	0.799107	0.0103075	0.113072	0.0194375	0.00413531	0.00636169	0.00798887	0.00471963
0.00353134	0.00291598	0.00743171	0.00468614	0.863207	0.0327277	0.0314013	0.0149648	0.000462651	0.0284695	0.00824896	0.00195305
0.00704909	0.00524087	0.00264929	0.047697	0.85132	0.00939471	0.0502524	0.00585311	0.00345815	0.00548845	0.00838524	0.00321131
0.00495991	0.00615584	0.00444301	0.013667	0.830413	0.00734924	0.096937	0.0166975	0.00297357	0.00551935	0.00838751	0.00249692
0.00583635	0.00599664	0.00246315	0.0169615	0.885176	0.00781516	0.0444944	0.00889581	0.00416638	0.00612273	0.00854576	0.00352614
0.0233598	0.00304222	0.000627194	0.0383421	0.608181	0.0130405	0.225043	0.0595144	0.00492962	0.0159644	0.00542745	0.00252816
0.00638538	0.0252306	0.00297739	0.0400053	0.672668	0.00463005	0.226133	0.00516338	0.000994143	0.00849448	0.00488151	0.00243685
0.00595402	0.00817849	0.00259871	0.0144411	0.841307	0.00486931	0.090754	0.0107552	0.00374089	0.00585416	0.00820766	0.00333984
0.00345726	0.0304034	0.00184762	0.0500152	0.699232	0.0194245	0.154065	0.0178748	0.00383726	0.00840286	0.00645224	0.00498728
0.00577343	0.00647933	0.00244772	0.00965925	0.861957	0.00798996	0.0725069	0.0104547	0.00417012	0.00651149	0.00840353	0.0036468
0.00704815	0.0144374	0.00205626	0.0607819	0.620623	0.00871902	0.17585	0.0302156	0.00541526	0.0395276	0.0300083	0.00531755
0.00978309	0.0115879	0.00215254	0.0536041	0.525756	0.0325469	0.228161	0.0620182	0.0133941	0.0119169	0.0462007	0.00287815
0.00751485	0.0239847	0.0023072	0.0401496	0.610694	0.0209389	0.146317	0.0529663	0.0098096	0.0164674	0.0234488	0.0454018
0.0124582	0.000807625	0.0109102	0.0169305	0.455198	0.0495125	0.187201	0.0280026	0.0225618	0.0197657	0.189384	0.00726756
0.00570621	0.00299789	0.00233006	0.0151983	0.882448	0.011423	0.0467282	0.00870471	0.00254468	0.00986459	0.00917426	0.00288019
0.00471625	0.0115664	0.00176657	0.00529647	0.718797	0.00708686	0.205473	0.0128468	0.00345372	0.0188272	0.00695061	0.00321902
0.00577479	0.00843225	0.00200499	0.040147	0.763004	0.00721884	0.145619	0.00878361	0.00334953	0.00593465	0.00583072	0.00390088
0.00562576	0.00205765	0.00166107	0.00463994	0.897155	0.0193741	0.0245757	0.0108109	0.00333521	0.0185998	0.00961625	0.00254904
0.00665891	0.00583204	0.00355911	0.00966096	0.909704	0.00859363	0.0217379	0.0131974	0.0037307	0.0057298	0.00866677	0.00292881
0.00555498	0.00746877	0.00244811	0.0337056	0.822845	0.00833853	0.0890826	0.00734397	0.00347093	0.00649652	0.00918219	0.00406322
0.0065878	0.00648242	0.00232091	0.0107599	0.890644	0.0120452	0.039933	0.00921831	0.00401851	0.00609848	0.00837639	0.00351544
0.00445806	0.0562455	0.00407298	0.0246293	0.642368	0.0148233	0.118713	0.105296	0.00405387	0.0134608	0.00733941	0.00454025
0.0637009	0.0209306	0.0016212	0.0719698	0.313512	0.047647	0.178391	0.157042	0.0319214	0.0487686	0.0560605	0.00843581
0.00483799	0.00708541	0.00175243	0.0381441	0.809277	0.0104791	0.0963532	0.0076867	0.00368677	0.00821142	0.00804132	0.00444457
0.00549847	0.00431506	0.00226503	0.0258732	0.829577	0.00826616	0.0959029	0.00565564	0.00394689	0.00470885	0.0082084	0.00578198
0.00536839	0.00739361	0.00255089	0.0173194	0.872952	0.0105284	0.0526744	0.00953685	0.00424243	0.00593204	0.00790878	0.00359235
0.00685523	0.00350477	0.00307512	0.011006	0.903641	0.00484536	0.036393	0.00834313	0.00378162	0.00657439	0.00864928	0.00333143
0.00418225	0.0223067	0.00204087	0.06052	0.717847	0.00562329	0.138143	0.0303839	0.00373839	0.0061196	0.00584692	0.00324796
0.00572283	0.00672976	0.00262346	0.0396837	0.824648	0.0086547	0.0818518	0.00612703	0.00418073	0.00699547	0.00862049	0.00416242
0.0324813	0.00294211	0.00161791	0.00473703	0.698876	0.0437874	0.085602	0.0371049	0.00473042	0.0339842	0.0514801	0.00265674
0.00504051	0.0105662	0.00176399	0.00885758	0.816065	0.0173137	0.0994132	0.0184824	0.00382844	0.00678316	0.00838509	0.0035009
0.00513449	0.015824	0.00165843	0.0381889	0.712138	0.0329006	0.158076	0.0125945	0.00234623	0.0052943	0.0124247	0.00341978
0.00487889	0.0200313	0.00267661	0.0585336	0.527351	0.0257218	0.152434	0.00480162	0.00167593	0.188658	0.00619422	0.00704376
0.00606891	0.00732169	0.00233821	0.0115879	0.878296	0.00465393	0.0580323	0.0094719	0.00409905	0.00653635	0.00824958	0.00334459
0.0169758	0.00473648	0.000938399	0.0189339	0.620021	0.00727569	0.232262	0.053149	0.0018438	0.00675835	0.0362926	0.00081363
0.00635282	0.00571211	0.0022929	0.0147744	0.820244	0.00819739	0.099758	0.0206163	0.00397855	0.00621601	0.00844086	0.0034167
0.00463727	0.0149618	0.00265902	0.0374547	0.821935	0.00924819	0.0785609	0.0102623	0.00441176	0.00522521	0.00681895	0.00382458
0.00471759	0.0142163	0.00248189	0.046214	0.773194	0.00968482	0.104967	0.0231269	0.00426477	0.00604112	0.00702828	0.00406311
0.00561942	0.00603875	0.00288617	0.00717076	0.89754	0.0161914	0.0309529	0.00984587	0.00385693	0.00773926	0.00883588	0.00332288
0.00352522	0.156256	0.00477284	0.0322427	0.513017	0.00879061	0.0991285	0.152615	0.00453876	0.0186149	0.00425409	0.00224533
0.00526207	0.00635344	0.00523416	0.0322591	0.820134	0.00936338	0.022101	0.0279904	0.00741646	0.0117182	0.0216622	0.0305052
0.00287503	0.00978771	0.0500506	0.166477	0.384283	0.0489608	0.145311	0.167631	0.0116516	0.00304741	0.00774336	0.00218149
0.00754825	0.00483066	0.00194735	0.0139552	0.853894	0.0199303	0.0626091	0.0114353	0.00377584	0.00770961	0.00879808	0.00356666
0.00549292	0.00805097	0.00215587	0.0297667	0.820702	0.0101255	0.0919473	0.00955889	0.00383901	0.00691897	0.00760811	0.00383325
0.00639443	0.00631261	0.00216606	0.0139127	0.888148	0.00650336	0.0474789	0.00769222	0.00393649	0.00591046	0.00802204	0.00352241
0.00626956	0.00539392	0.00243175	0.022217	0.888035	0.00902557	0.0391426	0.00664954	0.00393807	0.00548441	0.00806929	0.00334352
0.00794989	0.00368658	0.00230556	0.0111833	0.866708	0.00816316	0.0652448	0.0125135	0.00364711	0.00705728	0.00818464	0.00335657

## Sheet: 02_E_right
NN outputs for markers (LD)
Cytosol	ER	Golgi	Lysosome	Mitochondria	Nucleus	Peroxisome	PM	Endosome	LD	Protein-Complex	Translation
0.00228695	0.0916049	0.0329655	0.000767609	0.00316767	0.0174671	0.203641	0.0373862	0.0493491	0.540495	0.00499551	0.0158742
0.864532	0.00295784	0.00423238	0.00173859	0.00479792	0.0086607	0.00569822	0.00603677	0.00593522	0.0835209	0.00950484	0.00238513
0.0171839	0.136428	0.0391016	0.0433154	0.00231287	0.0190488	0.0149956	0.137861	0.197243	0.297008	0.0110821	0.0844203
0.0190432	0.0756268	0.0996683	0.0144602	0.00478405	0.0325956	0.0161295	0.0823593	0.129123	0.446539	0.00988972	0.0697818
0.00139997	0.346353	0.111763	0.0557823	0.0894808	0.000426694	0.111328	0.108566	0.0056582	0.0838559	0.00082206	0.0845647
0.00299192	0.213276	0.0800687	0.00952157	0.00193139	0.0250587	0.019156	0.150448	0.0855902	0.343289	0.00702411	0.061644
0.00465304	0.193911	0.0164186	0.000691715	0.00596709	0.0666178	0.0316424	0.0160312	0.00312706	0.653577	0.00398778	0.0033752
0.00169032	0.176388	0.0139869	0.000981573	0.00637316	0.014165	0.049177	0.0582323	0.0100909	0.659676	0.00469328	0.00454496
0.00282681	0.702831	0.0192374	0.00626546	0.00668738	0.00359089	0.0941053	0.0595458	0.00743649	0.0834505	0.00179527	0.0122274
0.00686256	0.549707	0.0168755	0.035886	0.0121597	0.0121166	0.025106	0.122494	0.0419647	0.104079	0.00364158	0.0691083
0.00180379	0.608325	0.0172212	0.0283941	0.014428	0.00586572	0.0390298	0.106583	0.0143301	0.146214	0.00186841	0.0159362
0.0037784	0.559624	0.00666671	0.072569	0.04059	0.0270743	0.078888	0.142813	0.0155463	0.0283088	0.00409708	0.0200442
0.00674924	0.00372729	0.00559609	0	0.0268877	0.0723178	0.00789173	0.0199259	0.00350245	0.846122	0.00440355	0.00287636
0.00826558	0.260423	0.0115816	0.0299479	0.00645516	0.015151	0.0288196	0.131782	0.0745313	0.319661	0.00979543	0.103587
0.000756085	0.162586	0.074427	0.00608425	0.0215524	0.113459	0.0240497	0.226813	0.0098344	0.358178	0.000521873	0.00173802
0.000791313	0.239528	0.0132861	0.0186679	0.00353574	0.115148	0.0957893	0.167271	0.00665168	0.311013	0.00143345	0.0268836
0.000751384	0.518241	0.0556671	0.0021514	0.00192323	0.00522425	0.0249389	0.0819077	0.0144337	0.284235	0.00106283	0.00946349
0.00273184	0.167029	0.0129201	0.00399664	0.00657982	0.0197433	0.0196229	0.0541526	0.00847308	0.679878	0.00401351	0.0208598
0.00155339	0.637393	0.0509777	0.00324329	0.0039763	0.0042102	0.0194823	0.0933646	0.012392	0.162046	0.00237075	0.0089905
0.0943178	0.0254596	0.0656387	0.00336504	0.00632379	0.0526381	0.00731327	0.0832102	0.134361	0.317106	0.174485	0.0357811
0.00102876	0.288147	0.0146903	0.0252948	0.0315937	0.0190685	0.02922	0.105229	0.00632745	0.463135	0.00267014	0.0135958
0.0163354	0.0447386	0.00499336	0.0161886	0.00423516	0.0579393	0.0127203	0.0515561	0.0313425	0.712212	0.0143309	0.0334078
0.00158254	0.303708	0.0226667	0.00133119	0.0032106	0.0109959	0.00721874	0.0306121	0.011121	0.584795	0.00299352	0.0197644
0.00197689	0.110606	0.01266	0.017694	0.00781616	0.167749	0.0085276	0.0231789	0.00349045	0.622154	0.00197078	0.0221765
0.00129221	0.477906	0.0515216	0.000538217	0.025607	0.00742427	0.0456167	0.101572	0.00463824	0.277218	0.00236948	0.00429661
0.0035001	0.056955	0.00282871	0.154329	0.0469968	0.034814	0.0563061	0.0466561	0.00405535	0.583314	0.00487937	0.00536559
0.0157124	0.00648615	0.00481103	3.15642e-05	0.00615023	0.0647043	0.00561848	0.0302686	0.00782919	0.846334	0.00731676	0.00473706
0.000484267	0.159471	0.0761896	0.00209556	0.0443446	0.0821334	0.0485945	0.127698	0.00721975	0.449732	5.93747e-05	0.00197841
0.195763	0.00503767	0.00375208	0.00334317	0.00565662	0.0337593	0.00846807	0.00692985	0.0213818	0.603141	0.103248	0.00951983
0.0036088	0.107505	0.16088	0.0428225	6.69393e-05	0.0172967	0.00266433	0.0591706	0.19808	0.319342	0.00200401	0.0865589
0.0068106	0.133006	0.0207604	0.0092533	0.00125463	0.0663206	0.0210198	0.138614	0.134137	0.340863	0.0116376	0.116323
0.00174213	0.392887	0.0222899	0.00093921	0.00647369	0.00594411	0.0126004	0.0267908	0.00286895	0.517904	0.00223102	0.00732885
0.00206095	0.488134	0.00795658	0.0300614	0.0108548	0.0145686	0.0840771	0.11779	0.00751782	0.213793	0.00228115	0.0209051
0.301652	0.00399789	0.00466665	0.0007169	0.00519703	0.0260633	0.00310531	0.00328823	0.00313615	0.63939	0.00796318	0.000823672
0.0311449	0.0618853	0.0173061	0.108764	0.00695212	0.0249295	0.0214838	0.129498	0.158638	0.274944	0.0601988	0.104255
0.0897799	0.00607204	0.00299547	0.000526979	0.00890311	0.1041	0.00986518	0.0264391	0.0133815	0.725074	0.00911107	0.00375154
0.199601	0.00512837	0.00841871	0.00141118	0.00712994	0.00752827	0.00475841	0.00400146	0.00354918	0.29563	0.461265	0.00157767
0.00211826	0.598659	0.0689094	0.00382085	0.00468227	0.00494517	0.00781659	0.0830028	0.0219949	0.146128	0.00404831	0.0538746
0.0692408	0.0160183	0.00245703	0.07033	0.00790902	0.294801	0.0314347	0.0309979	0.0316696	0.317083	0.096203	0.0318555
0.00299711	0.07076	0.011486	0.00162363	0.00622444	0.0420875	0.0124105	0.0796017	0.0120152	0.741107	0.00542877	0.0142578

## Sheet: 02_F_left
NN output for winner Mitochondria
BoxRank	actual Class	Min	Q1	Median	Q3	Max	WhiskerMin	WhiskerMax	Outliers
1	MITOCHONDRIA	0.729231	0.861991	0.931407	0.958406	0.963916	0.729231	0.963916
2	MITOCHONDRIA	0.824063	0.886267	0.929241	0.953628	0.960076	0.824063	0.960076
3	MITOCHONDRIA	0.770856	0.872688	0.929132	0.953598	0.959498	0.770856	0.959498
4	MITOCHONDRIA	0.84527	0.891787	0.927221	0.948624	0.953048	0.84527	0.953048
5	MITOCHONDRIA	0.838482	0.886015	0.926414	0.953211	0.959941	0.838482	0.959941
6	MITOCHONDRIA	0.826423	0.878465	0.924654	0.955225	0.960413	0.826423	0.960413
7	MITOCHONDRIA	0.829358	0.888671	0.923269	0.942504	0.955728	0.829358	0.955728
8	MITOCHONDRIA	0.836766	0.887347	0.922596	0.946544	0.963221	0.836766	0.963221
9	MITOCHONDRIA	0.837423	0.882128	0.921793	0.949369	0.957807	0.837423	0.957807
10	MITOCHONDRIA	0.830173	0.88025	0.92033	0.949273	0.965937	0.830173	0.965937
574	MITOCHONDRIA	0.113111	0.153024	0.389266	0.652504	0.773406	0.113111	0.773406
575	MITOCHONDRIA	0.100789	0.190622	0.379147	0.552021	0.594903	0.100789	0.594903
576	NUCLEUS	0.0103402	0.0514504	0.378989	0.714081	0.777854	0.0103402	0.777854
577	MITOCHONDRIA	0.0562086	0.21911	0.339705	0.493233	0.75493	0.0562086	0.75493
578	MITOCHONDRIA	0.0750486	0.0917267	0.310498	0.631772	0.955959	0.0750486	0.955959
579	MITOCHONDRIA	0.133484	0.227962	0.297687	0.383238	0.525188	0.133484	0.525188
580	MITOCHONDRIA	0.153984	0.187676	0.294668	0.488266	0.781776	0.153984	0.781776
581	MITOCHONDRIA	0.0113208	0.0667945	0.19127	0.328683	0.422972	0.0113208	0.422972
582	MITOCHONDRIA	0.0574554	0.0771873	0.133102	0.28397	0.588563	0.0574554	0.588563
583	PM	0.00643788	0.0106092	0.0220779	0.199811	0.702776	0.00643788	0.483614	0.7028

## Sheet: 02_F_right
NN output for winner LD
BoxRank	actual Class	Min	Q1	Median	Q3	Max	WhiskerMin	WhiskerMax	Outliers
1	LD	0.117761	0.675336	0.887794	0.92467	0.955498	0.301335	0.955498	0.1178
2	LD	0.64629	0.78867	0.884675	0.942338	0.969697	0.64629	0.969697
3	LD	0.0613821	0.647065	0.860667	0.89348	0.936793	0.277442	0.936793	0.0614
4	LD	0.736317	0.740564	0.840163	0.94572	0.967844	0.736317	0.967844
5	LD	0.0047748	0.559508	0.833945	0.928014	0.941643	0.00674768	0.941643	0.0048
6	LD	0.367535	0.678644	0.825366	0.887828	0.946162	0.367535	0.946162
7	LD	0.0412143	0.601042	0.82269	0.881323	0.952111	0.180621	0.952111	0.0412
8	LD	0.00272759	0.594383	0.816833	0.86184	0.921166	0.193197	0.921166	0.0027
9	LD	0.42132	0.668305	0.785037	0.841806	0.908903	0.42132	0.908903
10	LD	0.0115959	0.562294	0.760651	0.78167	0.800355	0.23323	0.800355	0.0116
17	LD	0.0660353	0.280379	0.358674	0.421584	0.589773	0.0685716	0.589773	0.0660
18	LD	0.0112904	0.260509	0.353546	0.367981	0.381392	0.099301	0.381392	0.0113
19	LD	0.014351	0.245836	0.348715	0.399887	0.476251	0.0147585	0.476251	0.0144
20	ER	0.0329023	0.24345	0.334951	0.433838	0.666545	0.0329023	0.666545
21	LD	0.230898	0.267507	0.307615	0.357214	0.422297	0.230898	0.422297
22	LD	0.119462	0.185104	0.302082	0.457842	0.639826	0.119462	0.639826
23	PM	0.00551432	0.14872	0.276972	0.360824	0.370834	0.00551432	0.370834
24	PM	0.165676	0.227264	0.249721	0.306895	0.472634	0.165676	0.426343	0.4726
25	CYTOPLASM	0.00312981	0.0119239	0.233691	0.573786	0.937564	0.00312981	0.937564
26	LD	0.0416855	0.0832622	0.15114	0.38722	0.933402	0.0416855	0.843156	0.9334

## Sheet: 02_G
	Fr01_median	Fr02_median	Fr03_median	Fr04_median	Fr05_median	Fr06_median	Fr07_median	Fr08_median	Fr09_median	Fr10_median	Fr11_median	Fr12_median	Fr13_median	Fr14_median	Fr15_median	Fr16_median	Fr17_median	Fr18_median	Fr19_median	Fr20_median	Fr21_median	Fr22_median	Fr23_median	Fr24_median
Marker_Mitochondria	0.279471	0	0	0	0	0	0	0	0.00500751	0.0152341	0.0353296	0.0429514	0.0705496	0.129437	0.211196	0.41687	0.792348	1	0.812548	0.577707	0.42549	0.432661	0.320819	0.0991206
Predicted_Mitochondria	0.283612	0	0	0	0	0	0	0	0	0.00267683	0.0262142	0.0357906	0.0632316	0.122298	0.204183	0.408437	0.789451	1	0.802063	0.565592	0.415287	0.418057	0.312451	0.0953803
Marker_LD	1	0.00196491	0	0.00340373	0.0207139	0.0407823	0.0545807	0.0598776	0.086798	0.132253	0.154682	0.17036	0.248249	0.224407	0.216348	0.215348	0.185709	0.20655	0.182153	0.150106	0.122935	0.139328	0.0984013	0.049798
Predicted_LD	1	0	0	0	0	0	0	0	0	0.00732562	0.0075003	0.0225606	0.0399738	0.0421688	0.0299918	0.0311395	0.0215683	0.0305756	0.031756	0.0255219	0.0201861	0.0366412	0.0204398	0.0356536

## Sheet: 02_H
MITOCHONDRIA_CCOMPASS	MITOCHONDRIA_SVM	MITOCHONDRIA_Marker		LD_CCOMPASS	LD_SVM	LD_Marker
A0A075B6P0;Q330K2;Q330K2-2	A0A075B6P0;Q330K2;Q330K2-2	A0A075B6P0;Q330K2;Q330K2-2		A0A075B6F9;Q9Y314	A0A087WZT2;Q6UX53	A0A0A0MRY9;Q96AQ7;Q96AQ7-2;Q96AQ7-4
A0A087WU07;Q5TGZ0	A0A087WU07;Q5TGZ0;Q5TGZ0-2	A0A087WWM6;E7EQL6;O43272;O43272-1;O43272-2		A0A087WT80;A0A087WW73;A0A0D9SF51;A0A0D9SG17;A0A1B0GWB6;Q9NQ66;Q9NQ66-2	E9PI09;E9PR24;Q5T0A1;Q5T0A2;Q5T0A6;Q86SQ9;Q86SQ9-2;Q86SQ9-4	A0A0J9YXN7
A0A087WUD3;Q9NRP0;Q9NRP0-2	A0A087WUQ6;A0A2R8Y6B6;P07203	A0A087WXC5;E7ESZ7;O95299		A0A087WTA8;P08123	F6SYP7;P98153;P98153-2	A0A3B3ITT1
A0A087WUQ6;P07203	A0A087WVM4;B7ZM99;Q6UB35	A0A087WXU0;Q9NWS8		A0A087WW59;Q7Z7L8	H0YI09;Q9H8H3	A4D1S5;A4D1S5-2
A0A087WWM6;E7EQL6;O43272;O43272-1;O43272-2	A0A087WVP7;P0C024;P0C024-2	A0A087WYF7;Q6UXV4		A0A087WWF6;F8W8R3;H7C1B3;P49005	M0QYZ2;M0R0N4;P53680	A9X3U0;Q96GF1
A0A087WX19;A0A087WX45;C9J5R6	A0A087WX19;A0A087WX45;C9J5R6	A0A087WZN1;O43837		A0A087WZG4;A0A3B3IPE9;A0A590UK10;Q6ZSZ5;Q6ZSZ5-1;Q6ZSZ5-2;Q6ZSZ5-5;Q6ZSZ5-6	O60240	B5MDU6;Q9H6V9;Q9H6V9-2
A0A087WXC5;E7ESZ7;O95299	A0A087WX97;Q9BXK5	A0A087X0L7;E7EVY0;J3KNA0;Q15070;Q15070-2		A0A087WZY2;A6NIV2;Q9P0U1	P37235	D6RCD0;Q8NBQ5
A0A087WXU0;Q9NWS8	A0A087WXC5;E7ESZ7;O95299	A0A0A0MT83;P26440		A0A087X0K0;P39059	P51153	H0YI09;Q9H8H3
A0A087WYF7;Q6UXV4	A0A087WXU0;A0A2R8Y4J4;Q9NWS8;Q9NWS8-2	A0A0B4J1R2;Q9H6R3		A0A0A0MQX1;Q9HD67	P56937;P56937-3	J3KQ12;Q96G97;Q96G97-4
A0A087WZC1;Q6IN84;Q6IN84-2	A0A087WYF7;Q6UXV4	A0A0B4J221;E9PR99;Q96LU5		A0A0A0MRY9;Q96AQ7;Q96AQ7-2;Q96AQ7-4	Q02156	O14656
A0A087WZN1;O43837	A0A087WYV9;A0A087X1F5;P57105	A0A0C4DG91;C9J9V6;O75414		A0A0A0MSJ9;Q15283;Q15283-2	Q709C8;Q709C8-3	O14657
A0A087X0L7;E7EVY0;J3KNA0;Q15070;Q15070-2	A0A087WZN1;O43837	A0A0C4DGA2;O75521;O75521-2		A0A0D9SF44;A0A0R4J2E2;Q9Y3T6;Q9Y3T6-3	Q86X19	O43169
A0A087X2D5;Q9BRJ2	A0A087WZY2;A6NIV2;Q9P0U1	A0A0C4DGB9		A0A0G2JNZ2;A0A669KB89;Q14160	Q8IWU2	O60240
A0A096LPI6	A0A087X0L7;E7EVY0;J3KNA0;Q15070;Q15070-2	A0A0D9SEI0;Q9P0P8		A0A140TA62;A0A140TA69;Q8IUT8	Q8NBX0	O60488;O60488-2
A0A0A0MRG8;Q16611	A0A087X1G1;H7BYD0;Q16718;Q16718-2	A0A0G2JIA5;A0A0G2JL52;A0A140T8Y0;A0A140TA35;A0A140TA36;B4E0K6;Q5ST30;Q5ST30-4		A0A1B0GTL5	Q8WTS1	O95810
A0A0A0MT83;P26440	A0A087X2D5;Q9BRJ2	A0A0U1RQK9		A0A1W2PNR9;Q9Y5U9	Q8WV41	P55058
A0A0A0MTS7;Q8WZ42;Q8WZ42-11;Q8WZ42-12;Q8WZ42-13;Q8WZ42-2;Q8WZ42-4;Q8WZ42-5;Q8WZ42-7;Q8WZ42-8	A0A096LP22;Q86Y79	A0A0U1RRK1;A0A286YF11;F6XEV2;Q9BPX6;Q9BPX6-2;Q9BPX6-3		A0A286YF00	Q92575	P56937;P56937-3
A0A0B4J1R2;Q9H6R3	A0A0A0MR02;P45880	A0A140TA86;Q5XKP0		A0A2Q3DP09;H7BZY2;Q7Z3E5;Q7Z3E5-2	Q96AD5	P60604
A0A0B4J221;E9PR99;Q96LU5	A0A0A0MRG8;Q16611	A0A182DWF2;A0A182DWF3;D3YTF8;Q9NNW7;Q9NNW7-2		A0A2R8YCL1;Q13322;Q13322-2;Q13322-3;Q13322-4	Q96DT0;Q96DT0-2;Q96DT0-5	Q15738
A0A0B4J2D5;P0DPI2	A0A0A0MSD2;A0A0C4DFM4;C9JGB2;Q96LZ7;Q96LZ7-2;Q96LZ7-3;Q96LZ7-4	A0A1B0GTG2;A0A1B0GW77;P49419;P49419-2		A0A3B3ISL7;A0A3B3ITY4;A0A3B3ITZ8;A0A3B3IUC5;Q8N8U9	Q96QC0	Q5THJ4;Q5THJ4-2
A0A0C4DFM0;G3V4T6	A0A0A0MT83;P26440	A0A1P0AYU5;Q9BWM7		A0A3B3ISR2;B4DPQ0;P00736	Q96RL7;Q96RL7-2;Q96RL7-3;Q96RL7-4	Q68D91
A0A0C4DG51;Q9NP80;Q9NP80-3	A0A0A6YYL4;P57737-3	A0A1W2PP11;A0A1W2PS40;C9JNP8;F8WCQ4;Q9H300;Q9H300-2		A0A3B3ITG3;H0Y3A3;Q5VWQ8;Q5VWQ8-2;Q5VWQ8-3;Q5VWQ8-4;Q5VWQ8-5	Q9BWJ5	Q709C8;Q709C8-3
A0A0C4DG91;C9J9V6;O75414	A0A0B4J1R2;Q9H6R3	A0A1W2PPM2;O43766;O43766-2		A0A3B3ITK0;P35442	Q9BYK8	Q8IZV5
A0A0C4DGA2;O75521;O75521-2	A0A0B4J2D5;P0DPI2	A0A2R8Y3N3;A0A2R8Y5P7;P49590;P49590-2		A0A3B3ITT1	Q9C037;Q9C037-2	Q8N5I4
A0A0C4DGB9	A0A0C4DFZ2;P15289;P15289-2	A0A2R8Y4Y7;A0A2R8YFW4;A0A2U3TZH1;Q9UQ90		A0A5E8;Q99501	Q9C0F1;Q9C0F1-2	Q8N6M3
A0A0D9SEI0;Q9P0P8	A0A0C4DG44;O43464;O43464-2;O43464-3	A0A2R8Y6Y7;A0A2R8YDQ9;Q9P2R7;Q9P2R7-2		A0A5F9ZGN6;P05089;P05089-2	Q9P273	Q8NBX0
A0A0D9SF60;Q99569;Q99569-2	A0A0C4DG51;Q9NP80;Q9NP80-3	A0A2Y9D025;P56556		A0A6E1WCP9;H0YGT3;P11474;P11474-2	Q9Y2K1;Q9Y2K1-2	Q8WTS1
A0A0D9SFK2;Q92614;Q92614-3;Q92614-4	A0A0C4DG91;C9J9V6;C9JQB1;O75414	A0A3B3IRN8;A0A3B3ITX0;P24311		A4D1S5;A4D1S5-2	R4GMX3	Q969G5
A0A0G2JIA5;A0A0G2JL52;A0A140T8Y0;A0A140TA35;A0A140TA36;B4E0K6;Q5ST30;Q5ST30-4	A0A0C4DGB9	A0A3B3ITP4;Q495G5;Q8IVH4		A6PVP4;B7ZBQ3;Q9H944;Q9H944-2		Q96AD5
A0A0U1RQK9	A0A0C4DGR6;A0A1B0GX61;Q96NB2;R4GMR9;R4GMS6;R4GMW0;R4GN63;R4GN74;R4GNC2	A0A494BZW8;A0A494C0B6;A0A494C0J9;A0A499FJL5;C9J8C7;E7ERD7;Q9UKU0;Q9UKU0-1;Q9UKU0-3;Q9UKU0-5;Q9UKU0-6;Q9UKU0-7;Q9UKU0-8;Q9UKU0-9		A6XND0;A6XND1;B3KWK7;P17936;P17936-2		Q96DT0-6;Q96DT0-7
A0A0U1RRK1;A0A286YF11;F6XEV2;Q9BPX6;Q9BPX6-2;Q9BPX6-3	A0A0C4DH07;Q8N2S1;Q8N2S1-2;Q8N2S1-3	A0A494C004;A0A494C0C5;A0A494C0V5;A0A494C141;A0A499FJ53;A6XNE1;F6Y2X3;Q16635;Q16635-2;Q16635-3;Q16635-4;Q16635-5;Q16635-6;Q16635-7;Q16635-8;Q16635-9		A8MTT3		Q96DT0;Q96DT0-2;Q96DT0-5
A0A0U1RRL7	A0A0D9SF60;Q99569;Q99569-2	A0A590UJS8;A0A5F9ZA98;O75027;O75027-2		B1AP13;H3BLV0;H7BY55;P08174;P08174-2;P08174-3;P08174-4;P08174-5;P08174-6;P08174-7		Q96E22
A0A0U1RRL8;Q8TB22;Q8TB22-2	A0A0D9SFE1;E9PJH7;Q9H936	A0A5F9ZH93;A0A5F9ZHX9;Q9UHN1		B1AVT0;P49760;P49760-3		Q96LJ7
A0A140TA86;Q5XKP0	A0A0J9YW18;F6RP06;Q12983	A0A5F9ZHJ0		B3KW70;F5GYX4;H0YG03;Q13361;Q13361-2		Q96Q06-2
A0A182DWF2;A0A182DWF3;D3YTF8;Q9NNW7;Q9NNW7-2	A0A0J9YWR7;A0A0J9YXE4;Q8N2F6;Q8N2F6-2;Q8N2F6-3;Q8N2F6-4	A0A5K1VW60;Q99766		B4DWG0;O95199;O95199-2		Q96RL7;Q96RL7-2;Q96RL7-3;Q96RL7-4
A0A1B0GTG2;A0A1B0GW77;P49419;P49419-2	A0A0U1RR76;A6NJ78;A6NJ78-2;A6NJ78-4;P0C7V9	A0A669KAX9;Q5T653		B5MDU6;Q9H6V9;Q9H6V9-2		Q99541
A0A1P0AYU5;Q9BWM7	A0A0U1RRK1;A0A286YF11;F6XEV2;Q9BPX6;Q9BPX6-2;Q9BPX6-3	A0A6Q8PFM5;A0A6Q8PG15;O95831;O95831-3		B5ME97;E7EW69;E7EX04;Q9P0V9;Q9P0V9-2;Q9P0V9-3		Q9BQK8;Q9BQK8-2
A0A1W2PP11;A0A1W2PS40;C9JNP8;F8WCQ4;Q9H300;Q9H300-2	A0A0U1RRL8;Q8TB22;Q8TB22-2;Q8TB22-3	A0A6Q8PGV8;O95140		C9J2C0;Q9NY65;Q9NY65-2		Q9H2F3
A0A1W2PPM2;O43766;O43766-2	A0A140T9G8;Q0P5T2;Q5SQH8;Q5SQH8-2;Q5SQH8-3;Q5SQH8-4	A0PJW6		C9J4I9		Q9H4L5;Q9H4L5-2
A0A2R8Y3N3;A0A2R8Y5P7;P49590;P49590-2	A0A140TA86;Q5XKP0	A2A274;Q99798		D6RCD0;Q8NBQ5		Q9NP72
A0A2R8Y4Y7;A0A2R8YFW4;A0A2U3TZH1;Q9UQ90	A0A182DWF2;A0A182DWF3;D3YTF8;Q9NNW7;Q9NNW7-2	A3KMH1;A3KMH1-3		E0CX11
A0A2R8Y4Z0;A0A2R8Y7W5;Q14004;Q14004-2	A0A1B0GTG2;A0A1B0GW77;P49419;P49419-2	A4D1E9		E7EP72;Q9UFG5
A0A2R8Y5P9;Q8TF72	A0A1B0GTK6;Q9BUE6;Q9BUE6-2	A6NFY7		E7EQ45;Q9H0R1
A0A2R8Y6Y7;A0A2R8YDQ9;Q9P2R7;Q9P2R7-2	A0A1B0GV71;A0A1B0GW34;A0A1B0GWD3;B4DFF3;H3BNK7;H3BR00;O95086;Q13286;Q13286-2;Q13286-3;Q13286-4;Q13286-5;Q13286-7;Q2TA70;Q9UBD8	A8MXV4		E9PC69;Q7KZI7;Q7KZI7-11;Q7KZI7-15;Q7KZI7-16;Q7KZI7-4;Q7KZI7-5;Q7KZI7-8;Q7KZI7-9
A0A2R8Y7H3	A0A1P0AYU5;Q9BWM7	B0QY95;Q9NQG6		E9PEZ1;Q8IWT3;Q8IWT3-3
A0A2R8YD49;Q9H1P3;Q9H1P3-2	A0A1W2PP11;A0A1W2PS40;C9JNP8;F8WCQ4;Q9H300;Q9H300-2	B1AL05;H0Y6Y8;Q8N983;Q8N983-2;Q8N983-3;Q8N983-4;Q8N983-6;Q8N983-7		E9PHY8;Q8NDA8
A0A2Y9D025;P56556	A0A1W2PPH1;P23368	B1ANH0;B1ANH2;Q16774;Q16774-2		E9PIG5;O00212
A0A3B3IRN8;A0A3B3ITX0;P24311	A0A2R8Y473;A0A590UJS8;A0A5F9ZA98;B4DGL8;O75027;O75027-2	B3KUS5;Q70CQ3		E9PIM6;E9PNQ8;P04216
A0A3B3ITP4;Q495G5;Q8IVH4	A0A2R8Y4R7;A0A2R8Y6L6;O75648;O75648-2	B4DJV2;O75390		E9PKE9;G3V148;Q9H920;Q9H920-2
A0A494C004;A0A494C0C5;A0A494C0V5;A0A494C141;A0A499FJ53;A6XNE1;F6Y2X3;Q16635;Q16635-2;Q16635-3;Q16635-4;Q16635-5;Q16635-6;Q16635-7;Q16635-8;Q16635-9	A0A2R8Y4Y7;A0A2R8Y726;A0A2R8YFW4;A0A2U3TZH1;Q9UQ90	B4DP62		ENSEMBL:ENSBTAP00000013050
A0A494C146;P50336	A0A2R8Y6Y7;A0A2R8YDQ9;Q9P2R7;Q9P2R7-2	B5MC53;B5MCF8;G5E9F5;P39210		ENSEMBL:ENSBTAP00000016046
A0A499FIS5;A0A499FJN1;A0A499FJS1;Q9BUB5;Q9BUB5-2;Q9BUB5-3	A0A2R8YCJ8;Q5T2H4;Q9NVV5;Q9NVV5-1;Q9NVV5-4	B7Z9I1;P11310;P11310-2;Q5T4U5		ENSEMBL:ENSBTAP00000018229
A0A590UJS8;A0A5F9ZA98;O75027;O75027-2	A0A2R8YEF5;M0R208;Q16740	B7ZL88;Q8N8Q8		ENSEMBL:ENSBTAP00000024146
A0A5F9ZH93;A0A5F9ZHX9;Q9UHN1	A0A2Y9D025;P56556	B7ZM99		ENSEMBL:ENSBTAP00000032840
A0A5F9ZHJ0	A0A3B3IRN8;A0A3B3ITX0;P24311	B8ZZJ6;H7C1S9;Q8TD22		F5GXW3;F5GYR2;F5H0H9;F5H4F8;F8W771;Q8TBY8;Q8TBY8-1;Q8TBY8-3
A0A5K1VW60;Q99766	A0A3B3ISK7;Q6PI48	B8ZZV9;B8ZZX2;Q9H8M1;Q9H8M1-2		F5H1C6;Q86UX7;Q86UX7-2
A0A669KAX9;Q5T653	A0A3B3ITN6;D6RA89;D6RBB0;O60683;O60683-2	C9IZF6;P41247;P41247-2		F8VXD5;Q53FV1
A0A6Q8PFM5;A0A6Q8PG15;O95831;O95831-3	A0A3B3ITP4;Q495G5;Q8IVH4	C9J406		G3V1D7
A0A6Q8PGV8;O95140	A0A3B3ITW8;Q9UI43	C9JAX1;Q16595		G3V3X5;Q14767
A0A6Q8PHK0;Q14669-2	A0A494C004;A0A494C0C5;A0A494C0V5;A0A494C141;A0A499FJ53;A6XNE1;F6Y2X3;Q16635;Q16635-2;Q16635-3;Q16635-4;Q16635-5;Q16635-6;Q16635-7;Q16635-8;Q16635-9	C9JBY7;Q9Y291		G3V5N8;Q9HBF4;Q9HBF4-3
A0PJW6	A0A494C146;P50336	C9JFR7;P99999		H0Y403;Q86VZ6;Q86VZ6-2
A2A274;Q99798	A0A494C160;P14854	C9JJ19;P82930		H0YGS3
A3KMH1;A3KMH1-3	A0A494C1M4;Q3SY69	C9JLB7;Q96HP4;U3KQU8		H0YI09;Q9H8H3
A4D1E9	A0A499FHX9;J3KQ69;P25205;P25205-2	C9JQ41;H7C525;Q4VC31		H3BM91;Q9H0A8
A6NFY7	A0A5F9ZH93;A0A5F9ZHX9;J3QRU9;Q9UHN1	C9JRZ6		I3L0R0;Q641Q3;Q641Q3-2
A6NJ78	A0A5F9ZHJ0	D6RAN8;Q9P0M9		J3KPP4;O95232
A8MSI8;D6RAR2;D6RFL2;J3KTA2	A0A5K1VW60;Q99766	D6RCM2;H0YAG5;Q9Y3D5		J3KTF9;Q8N138;Q8N138-4
A8MVW0	A0A669KAX9;Q5T653	D6REA0;O75879		J3QRN6;K7EIG7;O94832
A8MXV4	A0A6Q8PEX8;A0A6Q8PEZ4;A0A6Q8PFG4;A0A6Q8PGL3;A0A6Q8PGQ9;A0A6Q8PGS2;A0A6Q8PGU0;A0A6Q8PH79;A0A6Q8PH88;A0A6Q8PH97;A0A6Q8PHC1;A0A6Q8PHN7;B4DIH2;Q8TB36;Q8TB36-2	E2QRB3;P32322;P32322-3		K7EIN2;Q9BRJ7
B0QY95;Q9NQG6	A0A6Q8PFJ4;O95140	E5RHG9		K7ERG9;P00746
B1AL05;H0Y6Y8;Q8N983;Q8N983-2;Q8N983-3;Q8N983-4;Q8N983-6;Q8N983-7	A0A6Q8PFM5;A0A6Q8PG15;O95831;O95831-3	E7EPT4;P19404		K7ES70;P55083;P55083-2
B3KUS5;Q70CQ3	A0A6Q8PH91;Q9BQ69	E7EQY1;Q96C01		O00391
B4DJV2;O75390	A0PJW6	E7ESL0;J3KQY1;Q9NWU5		O00468;O00468-3;O00468-4;O00468-5;O00468-6;O00468-7
B4DK77;Q9H6K4	A3KMH1;A3KMH1-3	E7ETU7;H0Y9G6;P09001		O14498
B4DP62	A4D1E9	E7EX59;E9PDR0;P05166;P05166-2		O14727;O14727-4
B4DWH1;Q9Y6I8;Q9Y6I8-2	A6NFY7	E9PCG9;Q02338		O14974;O14974-4
B5MC22;Q9UDX5	A8MTT3	E9PEX6;P09622		O15037
B5MC53;B5MCF8;G5E9F5;P39210	A8MV81;C9JAW5;C9JNU6;Q9Y241;Q9Y241-2	E9PGQ0;Q96H78		O15117;O15117-2;O15117-3
B7Z2R7;Q5T8D3;Q5T8D3-2;Q5T8D3-3;Q5T8D3-4	A8MXV4	E9PM75;Q9NTG7		O43795
B7Z9I1;P11310;P11310-2;Q5T4U5	B0QYW5;F6RTR7;O43808	E9PN58		O43854;O43854-2
B7ZL88;Q8N8Q8	B1AL05;H0Y6Y8;H0YBU8;Q8N983;Q8N983-2;Q8N983-3;Q8N983-4;Q8N983-6;Q8N983-7	F2Z2X0;O00746;Q4TT34		O60237;O60237-6
B7ZM99	B3KUS5;Q70CQ3	F5GXJ1;F5H5N1;O75251;O75251-2		O60240
B8ZZJ6;H7C1S9;Q8TD22	B3KW70;F5GYX4;F5H2W4;F5H7Z2;H0YG03;Q13361;Q13361-2	F5GYJ5;Q9NX18		O60307
B8ZZV9;B8ZZX2;Q9H8M1;Q9H8M1-2	B4DJV2;O75390	F5GZ54		O60488;O60488-2
B9A057;Q86WW8	B4DLN1	F6TB26;Q5SZR4;Q9Y2W6		O60725
C9J406	B5MC22;H7C417;Q9UDX5	F8W7Q4;Q96A26		O75094;O75094-4
C9JAX1;Q16595	B5MC53;B5MCF8;G5E9F5;P39210	G3V0I5;P49821;P49821-2		O75173
C9JBY7;Q9Y291	B7Z2R2;P14927;P14927-2	G3XAN8;Q9Y5J9		O75460
C9JFR7;P99999	B7Z8R2;Q8WV60	G5E9V5;G5E9W7;P82650		O75531
C9JJ19;P82930	B7Z9I1;P11310;P11310-2;Q5T4U5	G8JLA1;Q8NBN7		O75964
C9JLB7;Q96HP4;U3KQU8	B7ZL88;Q8N8Q8	G8JLB3;Q9Y606;Q9Y606-2		O94769;O94769-2
C9JQ41;H7C525;Q4VC31	B8ZZJ6;H7C1S9;Q8TD22	H0Y7P7;Q9UG56		O94813;O94813-2;O94813-3;X6R3P0
C9JRZ6	B8ZZV9;B8ZZX2;Q9H8M1;Q9H8M1-2	H0Y8Y5		O94898
D6R9C3;H0UI06;P14406	B9A057;Q86WW8	H0Y962;Q8N4T8;Q8N4T8-2		O94907
D6RAN8;Q9P0M9	C9J365;C9JA28;Q9UNL2;Q9UNL2-2	H0YAN7;Q86XE3		O94966;O94966-5
D6RCM2;H0YAG5;Q9Y3D5	C9J406	H0YBZ4;Q15390;Q15390-2		O95084;O95084-2
D6RCP5;Q8N264;Q8N264-2;Q8N264-3	C9J6J1;C9JA07;Q9GZY4	H0YD36;P54098		O95273
D6REA0;O75879	C9J8Q5;P51649;P51649-2	H0YFD6;P40939		O95445;O95445-2;Q5SRP5
D6RH26;Q5HY62;Q8TE69;Q8TE69-2;Q96DE9;S4R3G8	C9JAX1;Q16595	H0YGR4;Q9Y3B8		O95810
E2QRB3;P32322;P32322-3	C9JBY7;Q9Y291	H0YI37		O95967
E5RHG9	C9JFR7;P99999	H3BP28;Q99807		P00735
E5RIK9;Q96E29;Q96E29-2;Q96E29-3	C9JG87;Q9NYK5;Q9NYK5-2	H3BRN4;P80404		P00761
E7EPT4;P19404	C9JJ19;P82930	H3BTB7;Q5JPH6;Q5JPH6-2		P01033;Q5H9A7
E7EQY1;Q96C01	C9JM75;H7C2C3;H7C454;Q6P087;Q6P087-2	H7C1U8;Q9BUR5		P02676
E7ESL0;J3KQY1;Q9NWU5	C9JQ41;H7C525;Q4VC31	H7C5B8;O95178		P02751-1
E7ETU7;H0Y9G6;P09001	C9JQS9;E7ETT1;E7ETT4;E7EUY3;E7EX59;E9PDR0;P05166;P05166-2	H7C5V5		P03928
E7EX59;E9PDR0;P05166;P05166-2	C9JRZ6;Q9NX63	I3L448;Q5TC12		P04114
E9PCG9;Q02338	C9JUU5;Q9Y234	J3KPP0;Q9Y6G3;S4R2Z7;S4R360		P05121
E9PE17;I3L0E3;Q9Y2R5	C9JY26;E7ES60	J3KPX7;Q99623		P05155;P05155-2;P05155-3
E9PEX6;P09622	C9K0G7;E9PCG9;Q02338	J3KS15;Q14197		P05784
E9PLN8;F8W9H0;I3L3B4;Q9BQB6;Q9BQB6-2;Q9BQB6-3	D6R9C3;D6RGV5;D6RIE3;H0UI06;P14406	J3QLS3;Q9Y2R9		P07093-2;P07093-3
E9PM75;Q9NTG7	D6R9Z7;P15954	J3QTA6;Q9BRQ6		P07585
E9PMB9;Q16798	D6RAN8;Q9P0M9	K7EK00;Q96ND0		P07996
E9PN58	D6REA0;O75879	K7EKE6;P36776;P36776-2		P08134;Q5JR08
ENSEMBL:ENSBTAP00000034412	E2QRB3;P32322;P32322-3	K7EL44;Q32NB8;Q32NB8-2		P08476
F2Z2X0;O00746;Q4TT34	E5RH91;Q8N5G0;Q8N5G0-2	K7ES61;Q9BYD3		P08567
F5GXJ1;F5H5N1;O75251;O75251-2	E5RIK9;E5RIY4;Q96E29;Q96E29-2;Q96E29-3	L0R8F8		P08648
F5GYJ5;Q9NX18	E5RJZ1;H0YBD2;O14548	M0QXF9;O15382		P08727
F6TB26;Q5SZR4;Q9Y2W6	E7EPT4;P19404	M0R208;Q16740		P08754
F8W7Q4;Q96A26	E7EQY1;Q96C01	O00142		P08949
G3V0I5;P49821;P49821-2	E7ESL0;J3KQY1;Q9NWU5;Q9NWU5-2;Q9NWU5-3	O00165		P09669
G3V325	E7ETU7;H0Y9G6;P09001	O00217		P09871
G3XAN8;Q9Y5J9	E7EWP0;H0Y886;O43674;O43674-2	O00330;O00330-3		P10600;P10600-2
G5E9V5;G5E9W7;P82650	E9PB90	O00411		P10646
G8JLA1;Q8NBN7	E9PCB6;Q9BYT8	O14561		P10909;P10909-2;P10909-4;P10909-5;P10909-6
G8JLB3;Q9Y606;Q9Y606-2	E9PCR7;Q02218	O14874		P13497
H0Y7P7;Q9UG56	E9PE17;I3L0E3;Q9Y2R5	O14880		P13611
H0Y8Y5	E9PE82;P16219	O14925		P13612
H0Y962;Q8N4T8;Q8N4T8-2	E9PEX6;P09622	O15091;O15091-2		P13646-1
H0YAN7;Q86XE3	E9PF17;P13611;P13611-2;P13611-3;P13611-4;P13611-5	O15228		P17096;P17096-3
H0YBZ4;Q15390;Q15390-2	E9PGQ0;Q96H78	O15235		P17301
H0YD36;P54098	E9PKH6;E9PN51;E9PPW7;F8W9K7;O00217	O43181		P17813
H0YF29;Q6P1X6	E9PM75;Q9NTG7	O43464		P21810
H0YFD6;P40939	E9PMB9;Q16798	O43615		P21964;P21964-2
H0YHF6;H0YIE9;O94952;O94952-1;Q4G104	E9PQN9;Q01629	O43676		P24588
H0YIV9	E9PRC5;Q7Z412;Q7Z412-2	O43678		P24821
H3BP28;Q99807	E9PRU1;O95967	O43772		P25874
H3BTB7;Q5JPH6;Q5JPH6-2	F2Z2X0;O00746;Q4TT34	O43808		P27469
H7C1U8;Q9BUR5	F5GWU3;F6RJU0;Q86YB7;Q86YB7-2	O43819		P28300
H7C1Z7;H7C270;Q9GZU7;Q9GZU7-2;Q9GZU7-3	F5GXJ1;F5H5N1;O75251;O75251-2	O43824		P29536;P29536-2
H7C5B8;O95178	F5H5I6;H0Y8R1;H0YAK1;Q12849	O43920		P31629
I3L448;Q5TC12	F5H702;Q96GC5;Q96GC5-3	O60313-2		P35221;P35221-2
J3KPP0;Q9Y6G3;S4R2Z7;S4R360	F6TB26;Q5SZR4;Q9Y2W6	O60783		P35555
J3KPT4;Q9H4I3	F8VZA2;Q6P1Q0;Q6P1Q0-2;Q6P1Q0-7	O75208		P35625
J3KPX7;Q99623	F8W1A4;P54819;P54819-2	O75306		P35900
J3KS15;Q14197	F8W7Q4;Q96A26	O75323		P39060;P39060-1;P39060-2
J3QLS3;Q9Y2R9	G3V0I5;P49821;P49821-2	O75380		P40616;P40616-2
J3QTA6;Q9BRQ6	G3V325	O75431;O75431-2		P41221;P41221-2
K7EK00;Q96ND0	G3V3U6;Q86TS9;Q86TS9-2;Q86TS9-3	O75439		P41222
K7EKE6;P36776;P36776-2	G3V3X5;G3V511;Q14767	O75600;O75600-2		P42338
K7EL44;Q32NB8;Q32NB8-2	G3V5F4;Q8N8R3;Q8N8R3-3	O75746		P42357;P42357-2;P42357-3
K7ENI6;K7ERE1;Q8N2U0	G3XAN4;Q15629;Q15629-2	O75880		P43235
K7ES61;Q9BYD3	G3XAN8;Q9Y5J9	O75947		P48047
L0R8F8	G5E9D5;Q9BQ52	O76031		P48061;P48061-2;P48061-3;P48061-4;P48061-5;P48061-6
M0QWZ7;Q9NP81	G5E9V5;G5E9W7;P82650	O94826		P49006
M0QXF9;O15382	G8JLA1;Q8NBN7	O94925		P49795
M0R208;Q16740	G8JLB3;Q9Y606;Q9Y606-2	O95139		P50448
M0R226;Q9BQ48	H0Y962;Q8N4T8;Q8N4T8-2	O95169;O95169-3		P51884
O00142	H0Y9P1;Q9NSY1	O95182		P51888
O00165	H0YAN7;Q86XE3	O95202		P51911
O00217	H0YF29;Q6P1X6	O95363		P52824
O00330;O00330-3	H0YFD6;P40939	O95563;Q5R3B4		P55058
O00411	H0YGS3	O95571		P56378;P56378-2
O00483	H0YIV9	O95822		P56381
O14521;O14521-2	H0YL72;P50213	O95900;O95900-2		P58215
O14548	H0YNW5;P33316;P33316-2	O96000		P59768
O14561	H3BP28;Q99807	O96008		P60604
O14874	H3BPJ9;O96000	P00156		P61225
O14880	H3BRG4;P22695	P00367		P61927
O14925	H3BRN4;P80404	P00395		P78357
O14949	H3BT12;Q9UK73	P00403		P78539
O15091;O15091-2	H3BTB7;Q5JPH6;Q5JPH6-2	P00414		P81605
O15230	H7C193;Q86UY8;Q86UY8-2	P00505		P83110
O15235	H7C1U8;Q9BUR5	P03915		P98095-2
O15239	H7C5B8;O95178	P04179		Q00013
O15439;O15439-2	H7C5R7;Q9BV10	P04181		Q00537
O43181	H7C5V5	P05091		Q03247
O43325	I3L072;Q9BSJ5;Q9BSJ5-2;Q9BSJ5-3	P05091-2		Q03393
O43464	I3L448;Q5TC12;Q5TC12-3	P05141		Q08431
O43615	J3KPP0;Q9Y6G3;S4R2Z7;S4R360	P05165;P05165-2		Q11201
O43676	J3KPT4;Q9H4I3	P06576		Q12851;Q12851-2
O43678	J3KPV1;Q9BUK0;Q9BUK0-2;Q9BUK0-4	P07919		Q13426
O43715	J3KPX7;Q99623	P07954;P07954-2		Q13625;Q13625-2;Q13625-3
O43772	J3KS15;Q14197	P08559;P08559-3;P08559-4		Q14123;Q14123-2
O43819	J3QL56;O75880	P08574		Q14191
O43824	J3QLR8;Q9Y3D9	P10109		Q14331
O43920	J3QLS3;Q9Y2R9	P10415;P10415-2		Q14766
O60220	J3QRP2;Q8IZR5;Q8IZR5-2;Q8IZR5-3	P10515		Q15113
O60238;O60238-2	J3QTA6;Q9BRQ6	P10606		Q15582
O60313-2	K4JQN1;Q07812;Q07812-2;Q07812-5;Q07812-7;Q07812-8	P10809		Q16512;Q16512-2
O60783	K7EJP1	P11177		Q16647
O60930	K7EJP6;K7EL44;K7ELT9;Q32NB8;Q32NB8-2;Q32NB8-3	P11182		Q28065
O75208	K7EK00;Q96ND0	P11498		Q28107
O75306	K7EK78;K7EMT4;K7EP35;K7EQ77;Q86Y39;Q86Y39-2	P12074		Q3SX14
O75323	K7EKE6;P36776;P36776-2	P12236		Q3ZAQ7
O75380	K7ENI6;K7ERE1;Q8N2U0	P12532		Q52LW3
O75394	K7ES61;Q9BYD3	P12694		Q562R1
O75431;O75431-2	L0R6Q1	P13051-2		Q58D62
O75438	L0R8F8	P13073		Q5BJF6;Q5BJF6-2;Q5BJF6-3;Q5BJF6-4
O75439	M0QWZ7;Q9NP81	P13196		Q5BKT4;Q5I7T1
O75489	M0QXB5;O95571	P13804		Q5T749
O75570	M0QXF9;O15382	P14927		Q5THJ4;Q5THJ4-2
O75600;O75600-2	O00142;O00142-4	P16219		Q68D91
O75616	O00165;O00165-2;O00165-5	P17152		Q6E0U4-16;Q6E0U4-2
O75648	O00330;O00330-3	P17540		Q6GQQ9;Q6GQQ9-2
O75746	O00391;O00391-2	P17568		Q6PCB0
O75792	O00411	P18859;P18859-2		Q6UY14;Q6UY14-3
O75880	O00468;O00468-3;O00468-4;O00468-5;O00468-6;O00468-7	P19367		Q6VY07
O75947	O00483	P20674		Q6ZMP0
O76031	O00566;U3KQ48	P21397		Q6ZU52
O94826	O14521;O14521-2	P21796		Q6ZW31
O94925	O14561	P21912		Q709C8;Q709C8-3
O95139	O14874;O14874-2;O14874-3	P21953		Q70EK8
O95167;S4R3I5	O14880	P22033		Q76M96;Q76M96-2
O95168	O14925	P22570-6		Q76N32;Q76N32-2
O95169;O95169-3	O14949	P22570;P22570-7		Q7Z5L7;Q7Z5L7-2;Q7Z5L7-3
O95182	O15091;O15091-2	P22695		Q86TV6;Q86TV6-2
O95202	O15228;O15228-2	P22830;P22830-2		Q86US8
O95363	O15235	P23368		Q86YZ3
O95563;Q5R3B4	O15239	P23434		Q8IUE6
O95571	O43181	P23786		Q8IUX7
O95822	O43325	P23919		Q8IVF2
O95900;O95900-2	O43615	P24752		Q8IX30;Q8IX30-2
O96000	O43676	P25325-2		Q8IY22
O96008	O43677	P25705		Q8IZV5
P00156	O43678	P25705-2		Q8N1N4;Q8N1N4-2
P00367	O43772	P27144		Q8N474
P00395	O43819	P27338		Q8N4H5
P00403	O43824	P28330		Q8N556
P00414	O43920	P28331;P28331-2;P28331-4		Q8N5I4
P00505	O60220	P30038		Q8N5K1
P00846	O60238;O60238-2	P30048;P30048-2		Q8N612;Q8N612-2
P03886	O60313-2	P30049		Q8N6G6
P03891	O60518	P30084		Q8N6Y2;Q8N6Y2-2
P03905	O60783	P30405		Q8NBX0
P03915	O75208	P30837		Q8NEY1-5
P04179	O75306	P31040		Q8TCD1
P04181	O75323	P31930		Q8TEQ0;Q8TEQ0-2
P05091	O75339	P31937		Q8TEW8;Q8TEW8-2;Q8TEW8-3;Q8TEW8-5;Q8TEW8-6
P05091-2	O75380	P32189;P32189-1;P32189-2;P32189-4		Q8WTS1
P05106	O75394	P33316		Q8WUY8
P05141	O75431;O75431-2	P34897;P34897-3		Q92620
P05165;P05165-2	O75438	P35232		Q92626
P06576	O75439	P35914		Q92743
P07919	O75489	P36542;P36542-2		Q92982
P07954;P07954-2	O75600;O75600-2	P36551		Q93096
P08559;P08559-3;P08559-4	O75616	P36957		Q969E8
P08574	O75746	P38117		Q969G5
P10109	O75947	P38646		Q96AD5
P10515	O75964	P40926		Q96AG4
P10606	O76031	P42126		Q96B49
P10809	O94826	P42704		Q96CC6
P11172	O94925	P42765		Q96DT0-6;Q96DT0-7
P11177	O95139	P43155;P43155-2		Q96DT0;Q96DT0-2;Q96DT0-5
P11182	O95167;S4R3I5	P43304		Q96E22
P11498	O95168;O95168-2	P43897		Q96GP6;Q96GP6-2
P12074	O95169;O95169-3	P45880		Q96I36
P12235	O95182	P45954		Q96IX5
P12236	O95202	P46199		Q96KR6
P12532	O95298	P47985		Q96PE2
P12694	O95363	P48735		Q96PE3;Q96PE3-2;Q96PE3-3;Q96PE3-4
P13051-2	O95563;Q5R3B4	P49406		Q96Q06-2
P13073	O95822;O95822-2	P49411		Q96Q45;Q96Q45-2;Q96Q45-3;Q96Q45-5
P13196	O95900;O95900-2	P49748;P49748-3		Q96RL7;Q96RL7-2;Q96RL7-3;Q96RL7-4
P13804	O96008;O96008-2	P49753		Q96S97
P14854	P00156	P50213		Q99541
P14927	P00367	P50416		Q99985
P15954	P00395	P51398;P51398-2		Q99988
P16219	P00403	P51553		Q9BR77;Q9BR77-2
P16260	P00414	P51649;P51649-2		Q9BSW2-2
P17152	P00505	P51687		Q9BTT6
P17540	P00846	P51970		Q9BU40-4;Q9BU40-5
P17568	P02751;P02751-1;P02751-3;P02751-7	P52789		Q9BU76;Q9BU76-4
P18859;P18859-2	P03886	P52815		Q9BY76
P19367	P03905	P53007		Q9BYI3-3
P20674	P03915	P53370		Q9BZF9
P21397	P03928	P53597		Q9H1J7
P21796	P04066	P53701		Q9H329;Q9H329-2
P21912	P04179	P54819		Q9H4L5;Q9H4L5-2
P21953	P04181	P54886;P54886-2		Q9H8W4
P22033	P04920;P04920-2;P04920-3	P55084;P55084-2		Q9HB66
P22570-6	P05091	P55789		Q9HBD1;Q9HBD1-4
P22570;P22570-7	P05141	P55809		Q9HBI1;Q9HBI1-2;Q9HBI1-3
P22695	P05165;P05165-2;P05165-3	P56181		Q9HCB6
P22830;P22830-2	P06576	P56181-2		Q9HCM4;Q9HCM4-3;Q9HCM4-4
P23368	P07919	P58557		Q9NP72
P23434	P07954;P07954-2	P61604		Q9NPF0
P23786	P08559;P08559-3;P08559-4	P62072		Q9NQ29;Q9NQ29-2
P23919	P08574	P82663		Q9NRN5;Q9NRN5-2
P24539	P09669	P82664		Q9NS98
P24752	P0C7P0	P82673		Q9NUP9
P25705	P10109	P82675		Q9NW61
P25705-2	P10515	P82909		Q9NWY4
P27144	P10606	P82912;P82912-2		Q9NWZ3
P27338	P10809	P82914		Q9P0K7;Q9P0K7-4
P28331;P28331-2;P28331-4	P11177	P82921		Q9P266
P30038	P11182	P82932		Q9UBI6
P30048;P30048-2	P11498	P82933		Q9UBS0
P30049	P12074	P83111		Q9UDY8;Q9UDY8-2
P30084	P12110-2	Q00059		Q9UJK0
P30405	P12235	Q00325-2		Q9UKR5
P30536	P12236	Q02127		Q9UKZ9
P30837	P12532	Q02218		Q9UM47
P31040	P12694	Q02252		Q9UMY1
P31327;P31327-3	P13051-2	Q02978		Q9UNA1;Q9UNA1-2
P31930	P13073	Q04837		Q9UNH6;Q9UNH6-3
P31937	P13196	Q07021		Q9UNN8
P32189;P32189-1;P32189-2;P32189-4	P13284	Q08257		Q9UPN7
P33316	P13804	Q10713		Q9UPR3
P34897;P34897-3	P13995;P13995-2	Q12849		Q9Y240
P35232	P16260	Q12931;Q12931-2		Q9Y264
P35914	P17152	Q13011		Q9Y2Z2;Q9Y2Z2-2;Q9Y2Z2-4;Q9Y2Z2-5;Q9Y2Z2-6
P36404	P17540	Q13084		Q9Y3B9
P36542;P36542-2	P17568	Q13232		Q9Y3M8;Q9Y3M8-2;Q9Y3M8-4
P36551	P19367;P19367-2;P19367-3;P19367-4	Q13405		Q9Y4F5;Q9Y4F5-2;Q9Y4F5-3
P36957	P20674	Q13423		Q9Y5G0
P38117	P21397	Q13505;Q13505-3		Q9Y5J5
P38646	P21796	Q13825		Q9Y662;Q9Y663
P40926	P21912	Q14296;Q14296-2;Q14296-3;Q14296-4		Q9Y679
P42126	P21953	Q15031		Q9Y689
P42704	P22033	Q15118
P42765	P22570;P22570-7	Q15119
P43155;P43155-2	P22830;P22830-2	Q15388
P43234	P23434	Q15526;Q15526-2
P43304	P23786	Q16134
P43897	P23919	Q16540
P45880	P24043	Q16654
P45954	P24539	Q16698-2
P46199	P24752	Q16718
P47985	P25705	Q16762
P48651	P25874	Q16795
P48735	P27144	Q16822
P49406	P27338	Q16836
P49411	P28330	Q16854;Q16854-2
P49448	P28331;P28331-2;P28331-4	Q16891
P49748;P49748-3	P28799	Q3KQZ1
P49753	P30038	Q3SXM5
P49914	P30048;P30048-2	Q3ZCQ8;Q3ZCQ8-2
P50213	P30049	Q4G0N4
P51398;P51398-2	P30084	Q4G176
P51553	P30405	Q4U2R6
P51649;P51649-2	P30837	Q53H12
P51687	P31040	Q53R41
P51970	P31327;P31327-3	Q56VL3
P52758	P31930	Q5BKU9
P52789	P31937	Q5HYI7
P52815	P32189;P32189-1;P32189-2;P32189-4	Q5HYK3
P53007	P34897;P34897-3	Q5JRX3
P53370	P35232	Q5JTJ3;Q5JTJ3-2;Q5JTJ3-3
P53597	P35555	Q5JTZ9
P53701	P35556	Q5QPA5;Q9NVS2;Q9NVS2-2
P54764;P54764-2	P35914	Q5RI15;Q5RI15-2
P54819	P36404	Q5T160
P54886;P54886-2	P36542;P36542-2	Q5T1C6
P55084;P55084-2	P36551	Q5T440
P55789	P36957	Q5T8A0;Q9Y399
P55809	P38117;P38117-2	Q5T9A4
P56181	P38159;P38159-2	Q5TEU4
P56181-2	P38646	Q5VT66;Q5VT66-2
P57105	P40926	Q6DKK2
P58557	P42126	Q6KCM7;Q6KCM7-2;Q6KCM7-3;Q6KCM7-4;Q6KCM7-5;Q6KCM7-6
P61604	P42356	Q6L8Q7;Q6L8Q7-2
P62072	P42704	Q6NUK1
P82663	P42765	Q6NVY1
P82664	P43155;P43155-2	Q6P087
P82673	P43304	Q6P161
P82675	P43897	Q6P1Q0;Q6P1Q0-2;Q6P1Q0-7
P82909	P45954;P45954-2	Q6P4A7
P82912;P82912-2	P46199	Q6P4F2
P82914	P47985	Q6P587
P82921	P48047	Q6PI48
P82932	P48651;P48651-2;P48651-3	Q6PI78
P82933	P48735	Q6UW78
P83111	P49406	Q6YN16
Q00059	P49411	Q7KZN9;Q7KZN9-2
Q00325-2	P49448	Q7L0Y3
Q00587;Q00587-2	P49748;P49748-3	Q7L3T8
Q02127	P49753	Q7L592
Q02218	P49914	Q7L8L6
Q02252	P50416;P50416-2	Q7Z3D6-2;Q7Z3D6-3
Q02978	P51398;P51398-2	Q7Z434
Q04695	P51553	Q7Z4W1
Q04837	P51687	Q7Z7F7;Q7Z7F7-2
Q05932;Q05932-2;Q05932-3;Q05932-4	P51970	Q7Z7H8;Q7Z7H8-2
Q07021	P52758	Q86SX6
Q08257	P53007	Q86TX2
Q10713	P53370	Q86U28
Q12849	P53597	Q86UT6
Q12931;Q12931-2	P53701	Q86UY8;Q86UY8-2
Q13011	P54886;P54886-2	Q86VD7
Q13084	P55001;P55001-2;P55001-3	Q86WA6;Q86WA6-2
Q13232	P55084;P55084-2	Q86WU2;Q86WU2-2
Q13405	P55789	Q86Y79
Q13423	P55809	Q86YB7
Q13472;Q13472-2;Q13472-3	P56181	Q86YH6
Q13505;Q13505-3	P56181-2	Q8IVS2
Q13608	P56381;Q5VTU8	Q8IWA4
Q13825	P56385	Q8IWL3
Q14061	P58557	Q8IXI1
Q14249	P61604	Q8IXI2-3;Q8IXI2-7
Q14296;Q14296-2;Q14296-3;Q14296-4	P62072	Q8IXM3
Q14684;Q14684-2	P78537;P78537-2	Q8IYB8
Q15031	P82663	Q8IYQ7
Q15118	P82664	Q8IYU8
Q15119	P82673	Q8N0V3
Q15120;Q15120-2	P82675	Q8N0X4
Q15388	P82909	Q8N183
Q15526;Q15526-2	P82912;P82912-2	Q8N2F6;Q8N2F6-3
Q16134	P82914	Q8N2H3
Q16394	P82921	Q8N442
Q16540	P82932	Q8N465
Q16654	P82933	Q8N490
Q16698-2	P83111	Q8N490-2
Q16718	P98095-2	Q8N490-3
Q16762	Q00059	Q8N4Q0
Q16795	Q00325-2	Q8N4Q1;Q8N4Q1-2
Q16822	Q02127	Q8N5M1
Q16836	Q02252;Q02252-2	Q8N5N7;Q8N5N7-2
Q16854;Q16854-2	Q02318	Q8NBU5
Q16891	Q02978	Q8NC60
Q2YD98	Q04837	Q8NE86;Q8NE86-3
Q32P41	Q07021	Q8NFV4;Q8NFV4-4
Q3KQZ1	Q08257	Q8NI37
Q3MIX3	Q10713	Q8NI60
Q3SXM5	Q12931	Q8TAE8
Q3ZCQ8;Q3ZCQ8-2	Q13011	Q8TB37
Q49A26;Q49A26-2;Q49A26-3;Q49A26-5	Q13084	Q8TCC3;Q8TCC3-2
Q49B96	Q13232	Q8TCS8
Q4G0I0	Q13405	Q8TD30
Q4G0N4	Q13423	Q8TDB4
Q4G176	Q13505;Q13505-3	Q8WV60
Q4U2R6	Q13825	Q8WV74
Q53H12	Q14249	Q8WV93
Q53H82	Q14296;Q14296-2;Q14296-3;Q14296-4	Q8WVM0
Q53R41	Q15031	Q8WW59
Q53S58	Q15118	Q8WWC4
Q56VL3	Q15119	Q8WWV3
Q5BKU9	Q15120;Q15120-2	Q92484;Q92484-2
Q5D862	Q15388	Q92506
Q5HYI7	Q15526;Q15526-2	Q92523;Q92523-4
Q5HYK3	Q16134	Q92552;Q92552-2
Q5JRX3	Q16540	Q92665
Q5JTJ3;Q5JTJ3-2;Q5JTJ3-3	Q16654	Q92667
Q5JTZ9	Q16698	Q92947
Q5QPA5;Q9NVS2;Q9NVS2-2	Q16762	Q969S9;Q969S9-3
Q5RI15;Q5RI15-2	Q16795	Q969V5
Q5SYV1;Q9UL12	Q16822	Q969Y2;Q969Y2-2;Q969Y2-3;Q969Y2-4
Q5T160	Q16836	Q969Z0
Q5T1C6	Q16891	Q969Z3
Q5T1R4;Q5T1R4-2	Q2M1P5	Q96A35
Q5T2R2;Q5T2R2-2;Q5T2R2-3	Q3KQZ1;Q3KQZ1-2;Q3KQZ1-3	Q96AG3
Q5T440	Q3SXM5;Q3SXM5-2	Q96AN5
Q5T4B9;Q9Y3A0;Q9Y3A0-2	Q49B96	Q96AQ8;U3KQP8
Q5T8A0;Q9Y399	Q4G0I0	Q96BQ5
Q5T9A4	Q4G0N4	Q96BR5
Q5TEU4	Q4G176	Q96C36
Q5VT66;Q5VT66-2	Q53H12	Q96CB9;Q96CB9-4
Q5VWZ2	Q53R41;Q53R41-2	Q96CM3
Q5W0B1	Q53S58	Q96CM8;Q96CM8-2;Q96CM8-3
Q6DKK2	Q56VL3	Q96CU9
Q6IB77	Q5BJF2	Q96D53;Q96D53-2
Q6IPR1	Q5BKU9	Q96DB5
Q6KCM7;Q6KCM7-2;Q6KCM7-3;Q6KCM7-4;Q6KCM7-5;Q6KCM7-6	Q5HYI7;Q5HYI7-4	Q96DC8
Q6NUK1	Q5HYK3	Q96DV4
Q6NVY1	Q5JRX3	Q96E11
Q6P087	Q5JTB4;Q5JTB6	Q96E52
Q6P161	Q5JTJ3;Q5JTJ3-2;Q5JTJ3-3	Q96EH3
Q6P1Q0;Q6P1Q0-2;Q6P1Q0-7	Q5JTZ9	Q96EL2
Q6P2H3;Q6P2H3-2	Q5JWT2;Q9ULK4;Q9ULK4-3;Q9ULK4-4;Q9ULK4-5	Q96EL3
Q6P4A7	Q5QPA5;Q9NVS2;Q9NVS2-2	Q96ER9
Q6P4F2	Q5RI15;Q5RI15-2	Q96EX1
Q6P587	Q5T160	Q96EY1
Q6PI48	Q5T1C6	Q96EY7
Q6PI78	Q5T440	Q96EY8
Q6PML9	Q5T4B9;Q9Y3A0;Q9Y3A0-2	Q96GC5;Q96GC5-3
Q6UB28	Q5T8A0;Q9Y399	Q96GW9
Q6UW78	Q5T9A4	Q96HJ9
Q6YN16	Q5TEU4	Q96HS1
Q6YP21;Q6YP21-3	Q5U5X0	Q96HY7
Q6ZU80	Q5VT66;Q5VT66-2	Q96I51
Q7KZN9;Q7KZN9-2	Q5VUM1	Q96I59
Q7L0Y3	Q68DW7;Q8WVM7;Q8WVM7-2	Q96I99
Q7L311	Q6DKK2	Q96JX3
Q7L3T8	Q6JQN1;Q6JQN1-5	Q96LZ7
Q7L4E1	Q6N069	Q96PE7
Q7L4S7	Q6NUK1	Q96Q11
Q7L592	Q6NVY1	Q96RP9
Q7L8L6	Q6P161	Q96RQ3
Q7L9B9	Q6P1L8	Q96SZ6;Q96SZ6-3;Q96SZ6-5;Q96SZ6-6
Q7Z2W9	Q6P4A7;Q6P4A7-3	Q96TA2;Q96TA2-2;Q96TA2-3
Q7Z333;Q7Z333-3;Q7Z333-4	Q6P4F2	Q96TC7
Q7Z388	Q6P587	Q99595
Q7Z3D6-2;Q7Z3D6-3	Q6PI78	Q99643;Q99643-3;Q99643-5
Q7Z434	Q6UB28	Q99714
Q7Z4G4;Q7Z4G4-2	Q6UW56;Q6UW56-3	Q99757
Q7Z4W1	Q6UW78	Q99797
Q7Z5H3;Q7Z5H3-2;Q7Z5H3-5	Q6UWS5	Q9BPW8
Q7Z7F7;Q7Z7F7-2	Q6UY14;Q6UY14-3	Q9BQ52
Q7Z7H8;Q7Z7H8-2	Q6YN16	Q9BQ69
Q86SX6	Q6ZMP0	Q9BQ95
Q86TS9;Q86TS9-3	Q6ZXV5;Q6ZXV5-2	Q9BSF4
Q86TX2	Q70UQ0	Q9BSH4
Q86U28	Q7L0Y3	Q9BSH5
Q86UT6	Q7L3T8	Q9BT17;U3KQ69
Q86UY8;Q86UY8-2	Q7L592	Q9BT30
Q86VD7	Q7L8L6	Q9BTZ2;Q9BTZ2-4;Q9BTZ2-8
Q86WA6;Q86WA6-2	Q7Z2W9	Q9BU61
Q86WU2;Q86WU2-2	Q7Z3D6;Q7Z3D6-2;Q7Z3D6-3;Q7Z3D6-5	Q9BUB7
Q86X52	Q7Z434	Q9BV79
Q86Y79	Q7Z7F7;Q7Z7F7-2	Q9BVS5
Q86YB7	Q7Z7H8;Q7Z7H8-2	Q9BVV7
Q86YH6	Q7Z7K0	Q9BW92
Q8IVS2	Q86SX6	Q9BWH2
Q8IVS8;Q8IVS8-4	Q86TX2	Q9BX68
Q8IWA4	Q86U28	Q9BXK5
Q8IWL3	Q86V87	Q9BXW7;Q9BXW7-2
Q8IWW8;Q8IWW8-2	Q86VD7	Q9BY49
Q8IXI1	Q86WA6;Q86WA6-2	Q9BYC8
Q8IXI2-3;Q8IXI2-7	Q86WA8	Q9BYD1
Q8IXM3	Q86WU2;Q86WU2-2	Q9BYD2
Q8IYB8	Q86YH6	Q9BYD6
Q8IYQ7	Q8IUX1;Q8IUX1-2;Q8IUX1-3;Q8IUX1-4;Q8IUX1-5	Q9BYN8
Q8IYU8	Q8IVP5	Q9BYT8
Q8N0V3	Q8IVS2	Q9BZE1
Q8N0X4	Q8IWA4	Q9GZT3;Q9GZT3-2
Q8N183	Q8IWL3	Q9GZT6;Q9GZT6-2
Q8N2F6;Q8N2F6-3	Q8IWW8;Q8IWW8-2	Q9GZY4
Q8N2H3	Q8IXI1	Q9GZY8
Q8N442	Q8IXI2;Q8IXI2-2;Q8IXI2-3;Q8IXI2-4;Q8IXI2-5;Q8IXI2-7	Q9GZY8-2
Q8N465	Q8IXM3	Q9H061
Q8N490-2	Q8IYB8	Q9H078;Q9H078-2
Q8N4Q0	Q8IYQ7	Q9H0P0;Q9H0P0-1;Q9H0P0-2;Q9H0P0-3;X6RM59
Q8N4Q1;Q8N4Q1-2	Q8IYU8	Q9H0R6
Q8N5M1	Q8N0X4;Q8N0X4-2	Q9H0U6
Q8N5N7;Q8N5N7-2	Q8N0Z8	Q9H1K1
Q8N8L6	Q8N183	Q9H1K4
Q8N8R5	Q8N2H3	Q9H1U9
Q8NBP0	Q8N442	Q9H2K0
Q8NBU5	Q8N465	Q9H2U2;Q9H2U2-2
Q8NC60	Q8N490-2	Q9H2W6
Q8NCL4	Q8N4H5	Q9H3H1;Q9H3H1-2;Q9H3H1-3;Q9H3H1-4;Q9H3H1-5
Q8NCN5	Q8N4Q0	Q9H3K2
Q8NE22;Q8NE22-2	Q8N4Q1;Q8N4Q1-2	Q9H4B0
Q8NE86;Q8NE86-3	Q8N556;Q8N556-2	Q9H5Q4
Q8NFF5;Q8NFF5-2	Q8N5N7;Q8N5N7-2	Q9H7Z7
Q8NFV4;Q8NFV4-4	Q8N5Z0;Q8N5Z0-2	Q9H845
Q8NFW1;Q8NFW1-2;Q8NFW1-3	Q8N6G6	Q9H857-2
Q8NI37	Q8N8L6	Q9H936
Q8NI60	Q8NBU5	Q9H9B4
Q8TAA5	Q8NC60	Q9H9J2
Q8TAE8	Q8NCN5	Q9H9P8
Q8TB37	Q8NE22;Q8NE22-2	Q9HA77
Q8TCC3;Q8TCC3-2	Q8NE86;Q8NE86-3	Q9HAC7;Q9HAC7-2;Q9HAC7-3;Q9HAC7-4
Q8TCS8	Q8NFF5;Q8NFF5-2	Q9HAV7
Q8TD30	Q8NFV4;Q8NFV4-4	Q9HC21;Q9HC21-2
Q8TDB4	Q8NI37	Q9HC36
Q8TF05;Q8TF05-2	Q8NI60	Q9HCC0
Q8WUJ3	Q8TAE8	Q9HCL2
Q8WUK0	Q8TB37	Q9HD33;Q9HD33-2
Q8WV60	Q8TC07;Q8TC07-2;Q8TC07-3	Q9HD34
Q8WV74	Q8TCC3;Q8TCC3-2	Q9NP92
Q8WV93	Q8TCS8	Q9NPE2
Q8WVM0	Q8TD30	Q9NPH0
Q8WW59	Q8WUK0	Q9NPJ3;Q9NPJ3-2
Q8WWC4	Q8WV74	Q9NPL8
Q8WWV3	Q8WV93	Q9NQ50
Q92506	Q8WVM0	Q9NQH7;Q9NQH7-4
Q92523;Q92523-4	Q8WW59	Q9NR28;Q9NR28-2
Q92552;Q92552-2	Q8WWC4	Q9NRK6
Q92665	Q8WWV3	Q9NRP2
Q92667	Q92506	Q9NRX2
Q92947	Q92523;Q92523-3;Q92523-4	Q9NS69
Q969M1	Q92552;Q92552-2	Q9NSE4
Q969S9;Q969S9-3	Q92665	Q9NUJ1
Q969V5	Q92667	Q9NUL7
Q969Y2;Q969Y2-2;Q969Y2-3;Q969Y2-4	Q92743	Q9NUQ2
Q969Z0	Q92947	Q9NUT2;Q9NUT2-2;Q9NUT2-4;Q9NUT2-5
Q969Z3	Q969M1	Q9NVA1
Q96A35	Q969S9;Q969S9-2;Q969S9-3	Q9NVH0
Q96AB3	Q969Y2;Q969Y2-2;Q969Y2-3;Q969Y2-4	Q9NVH1;Q9NVH1-3
Q96AG3	Q969Z0	Q9NVH6;Q9NVH6-8
Q96AN5	Q96A35	Q9NVI7-2
Q96AQ8;U3KQP8	Q96AB3;Q96AB3-2	Q9NW81;Q9NW81-4
Q96BQ5	Q96AG3	Q9NWR8
Q96BR5	Q96AN5	Q9NWU1
Q96BW9-3	Q96AQ8;U3KQP8	Q9NX00
Q96C36	Q96BQ5	Q9NX14;Q9NX14-2
Q96CB9;Q96CB9-4	Q96BR5	Q9NX20
Q96CM3	Q96BW9-3	Q9NX40
Q96CM8;Q96CM8-2;Q96CM8-3	Q96C36	Q9NX47
Q96CU9	Q96CB9;Q96CB9-4	Q9NXA8
Q96D53;Q96D53-2	Q96CM3;Q96CM3-2	Q9NYK5;Q9NYK5-2
Q96DA6;Q96DA6-2	Q96CM8;Q96CM8-2;Q96CM8-3	Q9NYY8
Q96DB5	Q96CU9	Q9NZ45
Q96DC8	Q96D53;Q96D53-2	Q9NZJ6
Q96DP5	Q96DA6;Q96DA6-2	Q9NZJ7;Q9NZJ7-2
Q96DV4	Q96DB5;Q96DB5-2	Q9P015
Q96E11	Q96DC8	Q9P032
Q96E52	Q96DV4	Q9P0J0;Q9P0J0-2
Q96EH3	Q96E11;Q96E11-2;Q96E11-3;Q96E11-4;Q96E11-5;Q96E11-6;Q96E11-7;X6RDS5	Q9P0J1;Q9P0J1-2
Q96EL2	Q96E52	Q9P291
Q96EL3	Q96EH3	Q9UBX3;Q9UBX3-2
Q96ER9	Q96EL2	Q9UDR5
Q96EX1	Q96EL3	Q9UFN0
Q96EY1	Q96ER9	Q9UGM6
Q96EY7	Q96EX1	Q9UHQ9
Q96EY8	Q96EY1	Q9UI09
Q96GC5;Q96GC5-3	Q96EY7	Q9UI17
Q96GE9;Q96GE9-2	Q96EY8	Q9UI43
Q96GW9	Q96GE9;Q96GE9-2	Q9UII2
Q96H55;Q96H55-3	Q96GW9	Q9UIJ7
Q96HJ9	Q96H55;Q96H55-3	Q9UJS0;Q9UJS0-2
Q96HS1	Q96HS1	Q9UJZ1
Q96HY7	Q96HY7	Q9UKU7
Q96I23	Q96I23	Q9UMS0;Q9UMS0-3
Q96I51	Q96I36
Q96I59	Q96I51
Q96I99	Q96I59
Q96JX3	Q96I99
Q96LW7-2	Q96IX5
Q96LZ7	Q96KR6
Q96NB2	Q96LW7-2
Q96PE7	Q96PE7
Q96PX6	Q96Q07;Q96Q07-2;Q96Q07-3
Q96RP9	Q96QE5
Q96RQ3	Q96RP9;Q96RP9-2
Q96SZ6;Q96SZ6-3;Q96SZ6-5;Q96SZ6-6	Q96RQ3
Q96TA2;Q96TA2-2;Q96TA2-3	Q96SZ6;Q96SZ6-3;Q96SZ6-5;Q96SZ6-6
Q96TC7	Q96TA2;Q96TA2-2;Q96TA2-3
Q99459	Q96TC7
Q99595	Q99595
Q99643;Q99643-3;Q99643-5	Q99643;Q99643-3;Q99643-5
Q99714	Q99714;Q99714-2
Q99757	Q99757
Q99797	Q99797
Q9BPW8	Q99798
Q9BQ95	Q9BPW8
Q9BS92	Q9BQC6
Q9BSF4	Q9BSF4
Q9BSH4	Q9BSH4
Q9BSH5	Q9BSH5
Q9BSJ5;Q9BSJ5-3	Q9BT17;U3KQ69
Q9BT17;U3KQ69	Q9BT30
Q9BT30	Q9BTY2
Q9BTC0	Q9BU61
Q9BU61	Q9BUB7;Q9BUB7-2
Q9BUB7	Q9BV79
Q9BUE6;Q9BUE6-2	Q9BVS5
Q9BV79	Q9BVV7
Q9BVS5	Q9BW92
Q9BVV7	Q9BWH2
Q9BW92	Q9BX68
Q9BWH2	Q9BXW7;Q9BXW7-2
Q9BX68	Q9BYB4
Q9BXK5	Q9BYC8
Q9BXW7;Q9BXW7-2	Q9BYC9
Q9BY49	Q9BYD1
Q9BYC8	Q9BYD2
Q9BYC9	Q9BYD6
Q9BYD1	Q9BYN8
Q9BYD2	Q9BZE1
Q9BYD6	Q9GZT3;Q9GZT3-2
Q9BYN8	Q9GZT6;Q9GZT6-2
Q9BYT8	Q9GZY8
Q9BZE1	Q9H019;Q9H019-3
Q9GZT3;Q9GZT3-2	Q9H061
Q9GZT6;Q9GZT6-2	Q9H078;Q9H078-2
Q9GZY4	Q9H0P0;Q9H0P0-1;Q9H0P0-2;Q9H0P0-3;X6RM59
Q9GZY8	Q9H0R6
Q9GZY8-2	Q9H0U6
Q9H019;Q9H019-3	Q9H1K1
Q9H078;Q9H078-2	Q9H1U9
Q9H0H5	Q9H2D1
Q9H0P0;Q9H0P0-1;Q9H0P0-2;Q9H0P0-3;X6RM59	Q9H2K0
Q9H0R6	Q9H2U2;Q9H2U2-2
Q9H0U6	Q9H2W6
Q9H1K1	Q9H3K2
Q9H1K4	Q9H4B0
Q9H1U9	Q9H4K7
Q9H2D1	Q9H5Q4
Q9H2K0	Q9H7H0;Q9H7H0-2;Q9H7H0-3
Q9H2U2;Q9H2U2-2	Q9H7Z7
Q9H2W6	Q9H845
Q9H3H1;Q9H3H1-2;Q9H3H1-3;Q9H3H1-4;Q9H3H1-5	Q9H857-2
Q9H3K2	Q9H9B4
Q9H4B0	Q9H9J2
Q9H4G0-2	Q9H9P8
Q9H4I9	Q9HAC7;Q9HAC7-2;Q9HAC7-3;Q9HAC7-4
Q9H4K7	Q9HAV7
Q9H5Q4	Q9HB66
Q9H7H0;Q9H7H0-2;Q9H7H0-3	Q9HBL7
Q9H7Z7	Q9HC21
Q9H845	Q9HC36
Q9H857-2	Q9HCC0;Q9HCC0-2
Q9H936	Q9HCL2
Q9H9B4	Q9HD33;Q9HD33-2
Q9H9J2	Q9HD34
Q9H9P8	Q9NP92
Q9HA77	Q9NPH0
Q9HAC7;Q9HAC7-2;Q9HAC7-3;Q9HAC7-4	Q9NPJ3;Q9NPJ3-2
Q9HAV7	Q9NPL8
Q9HBH1	Q9NQ50
Q9HBL7	Q9NQH7;Q9NQH7-4
Q9HC21;Q9HC21-2	Q9NR28;Q9NR28-2
Q9HC36	Q9NRG7
Q9HCC0	Q9NRK6
Q9HCL2	Q9NRP2
Q9HD33;Q9HD33-2	Q9NRP4
Q9HD34	Q9NRX2
Q9NP92	Q9NS18
Q9NPE2	Q9NS69
Q9NPH0	Q9NSE4
Q9NPJ3;Q9NPJ3-2	Q9NUJ1
Q9NPL8	Q9NUL7
Q9NQ50	Q9NUM4
Q9NQH7;Q9NQH7-4	Q9NUT2;Q9NUT2-2;Q9NUT2-4;Q9NUT2-5
Q9NR28;Q9NR28-2	Q9NVA1
Q9NRG1	Q9NVH0;Q9NVH0-2
Q9NRG7	Q9NVH1;Q9NVH1-3
Q9NRK6	Q9NVH6;Q9NVH6-8
Q9NRP2	Q9NVI7-2
Q9NRP4	Q9NVT9
Q9NRX2	Q9NVV4
Q9NS18	Q9NW81;Q9NW81-4
Q9NS69	Q9NWR8
Q9NSE4	Q9NWU1
Q9NUB1;Q9NUB1-2;Q9NUB1-3;Q9NUB1-4	Q9NX00
Q9NUJ1	Q9NX14;Q9NX14-2
Q9NUL7	Q9NX20
Q9NUQ2	Q9NX40
Q9NUT2;Q9NUT2-2;Q9NUT2-4;Q9NUT2-5	Q9NX47
Q9NV64	Q9NXA8;Q9NXA8-2;Q9NXA8-3
Q9NVA1	Q9NYY8;Q9NYY8-2
Q9NVH0	Q9NZ45
Q9NVH1;Q9NVH1-3	Q9NZB8;Q9NZB8-2;Q9NZB8-7;Q9NZB8-8
Q9NVH6;Q9NVH6-8	Q9NZE8
Q9NVI7-2	Q9NZJ6
Q9NVV4	Q9NZJ7;Q9NZJ7-2
Q9NW81;Q9NW81-4	Q9P015
Q9NWR8	Q9P032
Q9NWT8	Q9P0J0;Q9P0J0-2
Q9NWU1	Q9P0J1;Q9P0J1-2
Q9NX00	Q9P2J9
Q9NX14;Q9NX14-2	Q9UBX3;Q9UBX3-2
Q9NX20	Q9UDR5
Q9NX40	Q9UFN0
Q9NX47	Q9UGM6
Q9NXA8	Q9UH62
Q9NYK5;Q9NYK5-2	Q9UHQ9
Q9NYY8	Q9UI09
Q9NZ45	Q9UIJ7
Q9NZB8;Q9NZB8-2;Q9NZB8-8	Q9UJS0;Q9UJS0-2
Q9NZE8	Q9UJV9
Q9NZJ6	Q9UJZ1
Q9NZJ7;Q9NZJ7-2	Q9UKU7
Q9P015	Q9UMS0;Q9UMS0-3
Q9P032	Q9Y276
Q9P0J0;Q9P0J0-2	Q9Y277
Q9P0J1;Q9P0J1-2	Q9Y277-2
Q9P291	Q9Y2C4
Q9P2J9	Q9Y2D0
Q9TRI1	Q9Y2Q9
Q9UBX3;Q9UBX3-2	Q9Y2R0
Q9UDR5	Q9Y2S7
Q9UFN0	Q9Y2Z2;Q9Y2Z2-2;Q9Y2Z2-4;Q9Y2Z2-5;Q9Y2Z2-6
Q9UGM6	Q9Y2Z4
Q9UHQ9	Q9Y2Z9;Q9Y2Z9-3
Q9UI09	Q9Y305-4
Q9UI17	Q9Y375
Q9UI43	Q9Y3B7;Q9Y3B7-2
Q9UII2	Q9Y3D2
Q9UIJ7	Q9Y3D3
Q9UJS0;Q9UJS0-2	Q9Y3D5
Q9UJZ1	Q9Y4D1;Q9Y4D1-2;Q9Y4D1-3
Q9UKU7	Q9Y4W6
Q9ULJ3	Q9Y512
Q9UMS0;Q9UMS0-3	Q9Y5J7
Q9UNY4	Q9Y5L4
Q9UPQ0;Q9UPQ0-10;Q9UPQ0-2	Q9Y676
Q9Y276	Q9Y697;Q9Y697-2
Q9Y277	Q9Y6C2
Q9Y277-2	Q9Y6C9
Q9Y2C4	Q9Y6H1
Q9Y2D0	Q9Y6M9
Q9Y2Q3	Q9Y6N1
Q9Y2Q9	Q9Y6N5
Q9Y2R0
Q9Y2S7
Q9Y2Z4
Q9Y2Z9;Q9Y2Z9-3
Q9Y305-4
Q9Y375
Q9Y3B7;Q9Y3B7-2
Q9Y3D2
Q9Y3D3
Q9Y3D9
Q9Y4W6
Q9Y512
Q9Y5J7
Q9Y5L4
Q9Y5U8
Q9Y676
Q9Y697;Q9Y697-2
Q9Y6C9
Q9Y6H1
Q9Y6H3
Q9Y6M9
Q9Y6N1
Q9Y6N5

[truncated: 3 more sheets: 02_I, 02_J, 02_K]
