# Supplementary material for: C-COMPASS: a user-friendly neural network tool profiles cell compartments at protein and lipid levels
Source: Nat Methods. 2025 Dec 4;23(1):118–30. doi: 10.1038/s41592-025-02880-3 (PMC12791020; doi:10.1038/s41592-025-02880-3)
Supplement: Supplementary file 19 — Comparison with Mulvey et al. [file 41592_2025_2880_MOESM19_ESM.xlsx]

## Sheet: 03_B
Class	ctrl_median_Fr.1	ctrl_median_Fr.10	ctrl_median_Fr.11	ctrl_median_Fr.12	ctrl_median_Fr.13	ctrl_median_Fr.14	ctrl_median_Fr.15	ctrl_median_Fr.16	ctrl_median_Fr.17	ctrl_median_Fr.18	ctrl_median_Fr.19	ctrl_median_Fr.2	ctrl_median_Fr.20	ctrl_median_Fr.3	ctrl_median_Fr.4	ctrl_median_Fr.5	ctrl_median_Fr.6	ctrl_median_Fr.7	ctrl_median_Fr.8	ctrl_median_Fr.9
Cytosol	1	0.0137093	0.170148	0.0162627	0.106659	0.0187958	0.133427	0.021349	0.158476	0.0257942	0.129138	0	0.148935	0.0504065	0.0104633	0.0927917	0.00811248	0.127934	0.00974364	0.0949476
ER	0.0117542	0.563887	0.806954	0.843733	0.335298	0.667169	0.616866	0.746394	0.730841	1	0.575171	0	0.575402	0.024454	0.0453744	0.167361	0.210975	0.314464	0.250267	0.163684
Golgi	0	0.714525	1	0.902342	0.291975	0.825076	0.741706	0.726904	0.629225	0.677835	0.554471	0.0162003	0.525291	0.0391517	0.0696843	0.226801	0.307867	0.421173	0.336315	0.260306
Lysosome	0.0401685	0.799509	1	0.783489	0.478701	0.649174	0.557616	0.513319	0.381243	0.406949	0.359709	0	0.387288	0.0517086	0.104192	0.339986	0.317379	0.711165	0.379834	0.355825
Mitochondria	0.0169692	0.268267	0.304368	0.324557	0.154651	1	0.74906	0.71645	0.636625	0.830854	0.548294	0	0.476337	0.0133269	0.0297689	0.0964252	0.118113	0.167681	0.135373	0.127028
Nucleus	1	0.0911197	0.0948626	0.119212	0.103079	0.179256	0.181682	0.209762	0.27318	0.335953	0.360388	0	0.863591	0.0040621	0.0192263	0.0257654	0.0291508	0.052769	0.040028	0.0460452
Peroxisome	0.0100037	0.252972	0.26768	0.341793	0.198592	0.607616	0.493955	0.568198	0.585703	1	0.570508	0	0.573897	0.00836383	0.0355082	0.0892172	0.116162	0.181149	0.140687	0.0996073
PM	0	0.816624	1	0.836059	0.609755	0.471355	0.424122	0.327386	0.266859	0.265933	0.253506	0.3132	0.324087	0.307436	0.247212	0.44948	0.474215	0.773168	0.564636	0.575295
Chromatin	0.286143	0.267002	0.220704	0.296008	0.136884	0.727126	0.316931	0.588134	0.497401	0.925353	0.715586	0	1	0.0072102	0.0326937	0.0737303	0.108738	0.143068	0.126255	0.0997488
Nucleolus	0.349334	0.148215	0.0917059	0.19087	0.0848108	0.289736	0.149469	0.290187	0.199312	0.312945	0.241748	0.00152497	1	0	0.0272085	0.0243219	0.0631496	0.0559288	0.0774513	0.0429713
Ribosome	0.253271	0.341647	0.365307	0.436101	0.398279	0.80001	0.530162	0.539336	0.447442	0.611192	0.498402	0	1	0.0160303	0.033565	0.113186	0.131013	0.223315	0.169725	0.173043

## Sheet: 03_C
Control
Compartment	F1 score
Cytosol	1
ER	0.985714
Golgi	0.945946
Lysosome	0.989899
Mitochondria	0.987469
Nucleus	0.872727
Peroxisome	0.90566
PM	0.993007
Chromatin	0.935897
Nucleolus	0.894118
Ribosome	0.986486
weighted average	0.960935

## Sheet: 03_D
CC Hierarchical Clusterin for control condition
Cytosol	ER	Golgi	Lysosome	Mitochondria	Nucleus	Peroxisome	PM	Chromatin	Nucleolus	Ribosome
0	0	0	0	0.605091	0.394909	0	0	0	0	0
0	0	0.347184	0	0.652816	0	0	0	0	0	0
0	0	0.354637	0	0.645363	0	0	0	0	0	0
0	0	0.264933	0	0.735067	0	0	0	0	0	0
0	0	0.289029	0	0.710971	0	0	0	0	0	0
0	0.333798	0	0	0.666202	0	0	0	0	0	0
0	0.299858	0	0	0.700142	0	0	0	0	0	0
0	0.271382	0	0	0.728618	0	0	0	0	0	0
0	0	0	0	0.534577	0	0.465423	0	0	0	0
0	0	0	0	0.562086	0	0.437914	0	0	0	0
0	0	0	0	0.579237	0	0.420763	0	0	0	0
0	0	0	0	0.724196	0	0.275804	0	0	0	0
0	0	0	0	0.725024	0	0.274976	0	0	0	0
0	0	0	0	0.725447	0	0.274553	0	0	0	0
0	0	0	0	0.735579	0	0.264421	0	0	0	0
0	0	0	0	0.738067	0	0.261933	0	0	0	0
0	0	0	0	0.739342	0	0.260658	0	0	0	0
0	0	0	0	0.744186	0	0.255814	0	0	0	0
0	0	0	0	0.744485	0	0.255515	0	0	0	0
0	0	0	0	0.747769	0	0.252231	0	0	0	0
0	0	0	0	0.748518	0	0.251482	0	0	0	0
0	0	0	0	0.790919	0	0.209081	0	0	0	0
0	0	0	0	0.783949	0	0.216051	0	0	0	0
0	0	0	0	0.781312	0	0.218688	0	0	0	0
0	0	0	0	0.756566	0	0.243434	0	0	0	0
0	0	0	0	0.760758	0	0.239242	0	0	0	0
0	0	0	0	0.761496	0	0.238504	0	0	0	0
0	0	0	0	0.773528	0	0.226472	0	0	0	0
0	0	0	0	0.772499	0	0.227501	0	0	0	0
0	0	0	0	0.768354	0	0.231646	0	0	0	0
0	0	0	0	0.766103	0	0.233897	0	0	0	0
0	0	0	0	0.69962	0	0.30038	0	0	0	0
0	0	0	0	0.68973	0	0.31027	0	0	0	0
0	0	0	0	0.620921	0	0.379079	0	0	0	0
0	0	0	0	0.651208	0	0.348792	0	0	0	0
0	0	0	0	0.646046	0	0.353954	0	0	0	0
0	0	0	0	0.642167	0	0.357833	0	0	0	0
0.293693	0	0	0	0.706307	0	0	0	0	0	0
0.268139	0	0	0	0.731861	0	0	0	0	0	0
0.247713	0	0	0	0.752287	0	0	0	0	0	0
0.257323	0	0	0	0.742677	0	0	0	0	0	0
0	0	0	0	1	0	0	0	0	0	0
0	0	0	0	1	0	0	0	0	0	0
0	0	0	0	1	0	0	0	0	0	0
0	0	0	0	1	0	0	0	0	0	0
0	0	0	0	1	0	0	0	0	0	0
0	0	0	0	1	0	0	0	0	0	0
0	0	0	0	1	0	0	0	0	0	0
0	0	0	0	1	0	0	0	0	0	0
0	0	0	0	1	0	0	0	0	0	0
0	0	0	0	1	0	0	0	0	0	0
0	0	0	0	1	0	0	0	0	0	0
0	0	0	0	1	0	0	0	0	0	0
0	0	0	0	1	0	0	0	0	0	0
0	0	0	0	1	0	0	0	0	0	0
0	0	0	0	1	0	0	0	0	0	0
0	0	0	0	1	0	0	0	0	0	0
0	0	0	0	1	0	0	0	0	0	0
0	0	0	0	1	0	0	0	0	0	0
0	0	0	0	1	0	0	0	0	0	0
0	0	0	0	1	0	0	0	0	0	0
0	0	0	0	1	0	0	0	0	0	0
0	0	0	0	1	0	0	0	0	0	0
0	0	0	0	1	0	0	0	0	0	0
0	0	0	0	1	0	0	0	0	0	0
0	0	0	0	1	0	0	0	0	0	0
0	0	0	0	1	0	0	0	0	0	0
0	0	0	0	1	0	0	0	0	0	0
0	0	0	0	1	0	0	0	0	0	0
0	0	0	0	1	0	0	0	0	0	0
0	0	0	0	1	0	0	0	0	0	0
0	0	0	0	1	0	0	0	0	0	0
0	0	0	0	1	0	0	0	0	0	0
0	0	0	0	1	0	0	0	0	0	0
0	0	0	0	1	0	0	0	0	0	0
0	0	0	0	1	0	0	0	0	0	0
0	0	0	0	1	0	0	0	0	0	0
0	0	0	0	1	0	0	0	0	0	0
0	0	0	0	1	0	0	0	0	0	0
0	0	0	0	1	0	0	0	0	0	0
0	0	0	0	1	0	0	0	0	0	0
0	0	0	0	1	0	0	0	0	0	0
0	0	0	0	1	0	0	0	0	0	0
0	0	0	0	1	0	0	0	0	0	0
0	0	0	0	1	0	0	0	0	0	0
0	0	0	0	1	0	0	0	0	0	0
0	0	0	0	1	0	0	0	0	0	0
0	0	0	0	1	0	0	0	0	0	0
0	0	0	0	1	0	0	0	0	0	0
0	0	0	0	1	0	0	0	0	0	0
0	0	0	0	1	0	0	0	0	0	0
0	0	0	0	1	0	0	0	0	0	0
0	0	0	0	1	0	0	0	0	0	0
0	0	0	0	1	0	0	0	0	0	0
0	0	0	0	1	0	0	0	0	0	0
0	0	0	0	1	0	0	0	0	0	0
0	0	0	0	1	0	0	0	0	0	0
0	0	0	0	1	0	0	0	0	0	0
0	0	0	0	1	0	0	0	0	0	0
0	0	0	0	1	0	0	0	0	0	0
0	0	0	0	1	0	0	0	0	0	0
0	0	0	0	1	0	0	0	0	0	0
0	0	0	0	1	0	0	0	0	0	0
0	0	0	0	1	0	0	0	0	0	0
0	0	0	0	1	0	0	0	0	0	0
0	0	0	0	1	0	0	0	0	0	0
0	0	0	0	1	0	0	0	0	0	0
0	0	0	0	1	0	0	0	0	0	0
0	0	0	0	1	0	0	0	0	0	0
0	0	0	0	1	0	0	0	0	0	0
0	0	0	0	1	0	0	0	0	0	0
0	0	0	0	1	0	0	0	0	0	0
0	0	0	0	1	0	0	0	0	0	0
0	0	0	0	1	0	0	0	0	0	0
0	0	0	0	1	0	0	0	0	0	0
0	0	0	0	1	0	0	0	0	0	0
0	0	0	0	1	0	0	0	0	0	0
0	0	0	0	1	0	0	0	0	0	0
0	0	0	0	1	0	0	0	0	0	0
0	0	0	0	1	0	0	0	0	0	0
0	0	0	0	1	0	0	0	0	0	0
0	0	0	0	1	0	0	0	0	0	0
0	0	0	0	1	0	0	0	0	0	0
0	0	0	0	1	0	0	0	0	0	0
0	0	0	0	1	0	0	0	0	0	0
0	0	0	0	1	0	0	0	0	0	0
0	0	0	0	1	0	0	0	0	0	0
0	0	0	0	1	0	0	0	0	0	0
0	0	0	0	1	0	0	0	0	0	0
0	0	0	0	1	0	0	0	0	0	0
0	0	0	0	1	0	0	0	0	0	0
0	0	0	0	1	0	0	0	0	0	0
0	0	0	0	1	0	0	0	0	0	0
0	0	0	0	1	0	0	0	0	0	0
0	0	0	0	1	0	0	0	0	0	0
0	0	0	0	1	0	0	0	0	0	0
0	0	0	0	1	0	0	0	0	0	0
0	0	0	0	1	0	0	0	0	0	0
0	0	0	0	1	0	0	0	0	0	0
0	0	0	0	1	0	0	0	0	0	0
0	0	0	0	1	0	0	0	0	0	0
0	0	0	0	1	0	0	0	0	0	0
0	0	0	0	1	0	0	0	0	0	0
0	0	0	0	1	0	0	0	0	0	0
0	0	0	0	1	0	0	0	0	0	0
0	0	0	0	1	0	0	0	0	0	0
0	0	0	0	1	0	0	0	0	0	0
0	0	0	0	1	0	0	0	0	0	0
0	0	0	0	1	0	0	0	0	0	0
0	0	0	0	1	0	0	0	0	0	0
0	0	0	0	1	0	0	0	0	0	0
0	0	0	0	1	0	0	0	0	0	0
0	0	0	0	1	0	0	0	0	0	0
0	0	0	0	1	0	0	0	0	0	0
0	0	0	0	1	0	0	0	0	0	0
0	0	0	0	1	0	0	0	0	0	0
0	0	0	0	1	0	0	0	0	0	0
0	0	0	0	1	0	0	0	0	0	0
0	0	0	0	1	0	0	0	0	0	0
0	0	0	0	1	0	0	0	0	0	0
0	0	0	0	1	0	0	0	0	0	0
0	0	0	0	1	0	0	0	0	0	0
0	0	0	0	1	0	0	0	0	0	0
0	0	0	0	1	0	0	0	0	0	0
0	0	0	0	1	0	0	0	0	0	0
0	0	0	0	1	0	0	0	0	0	0
0	0	0	0	1	0	0	0	0	0	0
0	0	0	0	1	0	0	0	0	0	0
0	0	0	0	1	0	0	0	0	0	0
0	0	0	0	1	0	0	0	0	0	0
0	0	0	0	1	0	0	0	0	0	0
0	0	0	0	1	0	0	0	0	0	0
0	0	0	0	1	0	0	0	0	0	0
0	0	0	0	1	0	0	0	0	0	0
0	0	0	0	1	0	0	0	0	0	0
0	0	0	0	1	0	0	0	0	0	0
0	0	0	0	1	0	0	0	0	0	0
0	0	0	0	1	0	0	0	0	0	0
0	0	0	0	1	0	0	0	0	0	0
0	0	0	0	1	0	0	0	0	0	0
0	0	0	0	1	0	0	0	0	0	0
0	0	0	0	1	0	0	0	0	0	0
0	0	0	0	1	0	0	0	0	0	0
0	0	0	0	1	0	0	0	0	0	0
0	0	0	0	1	0	0	0	0	0	0
0	0	0	0	1	0	0	0	0	0	0
0	0	0	0	1	0	0	0	0	0	0
0	0	0	0	1	0	0	0	0	0	0
0	0	0	0	1	0	0	0	0	0	0
0	0	0	0	1	0	0	0	0	0	0
0	0	0	0	1	0	0	0	0	0	0
0	0	0	0	1	0	0	0	0	0	0
0	0	0	0	1	0	0	0	0	0	0
0	0	0	0	1	0	0	0	0	0	0
0	0	0	0	1	0	0	0	0	0	0
0	0	0	0	1	0	0	0	0	0	0
0	0	0	0	1	0	0	0	0	0	0
0	0	0	0	1	0	0	0	0	0	0
0	0	0	0	1	0	0	0	0	0	0
0	0	0	0	1	0	0	0	0	0	0
0	0	0	0	1	0	0	0	0	0	0
0	0	0	0	1	0	0	0	0	0	0
0	0	0	0	1	0	0	0	0	0	0
0	0	0	0	1	0	0	0	0	0	0
0	0	0	0	1	0	0	0	0	0	0
0	0	0	0	1	0	0	0	0	0	0
0	0	0	0	1	0	0	0	0	0	0
0	0	0	0	1	0	0	0	0	0	0
0	0	0	0	1	0	0	0	0	0	0
0	0	0	0	1	0	0	0	0	0	0
0	0	0	0	1	0	0	0	0	0	0
0	0	0	0	1	0	0	0	0	0	0
0	0	0	0	1	0	0	0	0	0	0
0	0	0	0	1	0	0	0	0	0	0
0	0	0	0	1	0	0	0	0	0	0
0	0	0	0	1	0	0	0	0	0	0
0	0	0	0	1	0	0	0	0	0	0
0	0	0	0	1	0	0	0	0	0	0
0	0	0	0	1	0	0	0	0	0	0
0	0	0	0	1	0	0	0	0	0	0
0	0	0	0	1	0	0	0	0	0	0
0	0	0	0	1	0	0	0	0	0	0
0	0	0	0	1	0	0	0	0	0	0
0	0	0	0	1	0	0	0	0	0	0
0	0	0	0	1	0	0	0	0	0	0
0	0	0	0	1	0	0	0	0	0	0
0	0	0	0	1	0	0	0	0	0	0
0	0	0	0	1	0	0	0	0	0	0
0	0	0	0	1	0	0	0	0	0	0
0	0	0	0	1	0	0	0	0	0	0
0	0	0	0	1	0	0	0	0	0	0
0	0	0	0	1	0	0	0	0	0	0
0	0	0	0	1	0	0	0	0	0	0
0	0	0	0	1	0	0	0	0	0	0
0	0	0	0	1	0	0	0	0	0	0
0	0	0	0	1	0	0	0	0	0	0
0	0	0	0	1	0	0	0	0	0	0
0	0	0	0	1	0	0	0	0	0	0
0	0	0	0	1	0	0	0	0	0	0
0	0	0	0	1	0	0	0	0	0	0
0	0	0	0	1	0	0	0	0	0	0
0	0	0	0	1	0	0	0	0	0	0
0	0	0	0	1	0	0	0	0	0	0
0	0	0	0	1	0	0	0	0	0	0
0	0	0	0	1	0	0	0	0	0	0
0	0	0	0	1	0	0	0	0	0	0
0	0	0	0	1	0	0	0	0	0	0
0	0	0	0	1	0	0	0	0	0	0
0	0	0	0	1	0	0	0	0	0	0
0	0	0	0	1	0	0	0	0	0	0
0	0	0	0	1	0	0	0	0	0	0
0	0	0	0	1	0	0	0	0	0	0
0	0	0	0	1	0	0	0	0	0	0
0	0	0	0	1	0	0	0	0	0	0
0	0	0	0	1	0	0	0	0	0	0
0	0	0	0	1	0	0	0	0	0	0
0	0	0	0	1	0	0	0	0	0	0
0	0	0	0	1	0	0	0	0	0	0
0	0	0	0	1	0	0	0	0	0	0
0	0	0	0	1	0	0	0	0	0	0
0	0	0	0	1	0	0	0	0	0	0
0	0	0	0	1	0	0	0	0	0	0
0	0	0	0	1	0	0	0	0	0	0
0	0	0	0	1	0	0	0	0	0	0
0	0	0	0	1	0	0	0	0	0	0
0	0	0	0	1	0	0	0	0	0	0
0	0	0	0	1	0	0	0	0	0	0
0	0	0	0	1	0	0	0	0	0	0
0	0	0	0	1	0	0	0	0	0	0
0	0	0	0	1	0	0	0	0	0	0
0	0	0	0	1	0	0	0	0	0	0
0	0	0	0	1	0	0	0	0	0	0
0	0	0	0	1	0	0	0	0	0	0
0	0	0	0	1	0	0	0	0	0	0
0	0	0	0	1	0	0	0	0	0	0
0	0	0	0	1	0	0	0	0	0	0
0	0	0	0	1	0	0	0	0	0	0
0	0	0	0	1	0	0	0	0	0	0
0	0	0	0	1	0	0	0	0	0	0
0	0	0	0	1	0	0	0	0	0	0
0	0	0	0	1	0	0	0	0	0	0
0	0	0	0	1	0	0	0	0	0	0
0	0	0	0	1	0	0	0	0	0	0
0	0	0	0	1	0	0	0	0	0	0
0	0	0	0	1	0	0	0	0	0	0
0	0	0	0	1	0	0	0	0	0	0
0	0	0	0	1	0	0	0	0	0	0
0	0	0	0	1	0	0	0	0	0	0
0	0	0	0	1	0	0	0	0	0	0
0	0	0	0	1	0	0	0	0	0	0
0	0	0	0	1	0	0	0	0	0	0
0	0	0	0	1	0	0	0	0	0	0
0	0	0	0	1	0	0	0	0	0	0
0	0	0	0	1	0	0	0	0	0	0
0	0	0	0	1	0	0	0	0	0	0
0	0	0	0	1	0	0	0	0	0	0
0	0	0	0	1	0	0	0	0	0	0
0	0	0	0	1	0	0	0	0	0	0
0	0	0	0	1	0	0	0	0	0	0
0	0	0	0	1	0	0	0	0	0	0
0	0	0	0	1	0	0	0	0	0	0
0	0	0	0	1	0	0	0	0	0	0
0	0	0	0	1	0	0	0	0	0	0
0	0	0	0	1	0	0	0	0	0	0
0	0	0	0	1	0	0	0	0	0	0
0	0	0	0	1	0	0	0	0	0	0
0	0	0	0	1	0	0	0	0	0	0
0	0	0	0	1	0	0	0	0	0	0
0	0	0	0	1	0	0	0	0	0	0
0	0	0	0	1	0	0	0	0	0	0
0	0	0	0	1	0	0	0	0	0	0
0	0	0	0	1	0	0	0	0	0	0
0	0	0	0	1	0	0	0	0	0	0
0	0	0	0	1	0	0	0	0	0	0
0	0	0	0	1	0	0	0	0	0	0
0	0	0	0	1	0	0	0	0	0	0
0	0	0	0	1	0	0	0	0	0	0
0	0	0	0	1	0	0	0	0	0	0
0	0	0	0	1	0	0	0	0	0	0
0	0	0	0	1	0	0	0	0	0	0
0	0	0	0	1	0	0	0	0	0	0
0	0	0	0	1	0	0	0	0	0	0
0	0	0	0	1	0	0	0	0	0	0
0	0	0	0	1	0	0	0	0	0	0
0	0	0	0	1	0	0	0	0	0	0
0	0	0	0	1	0	0	0	0	0	0
0	0	0	0	1	0	0	0	0	0	0
0	0	0	0	1	0	0	0	0	0	0
0	0	0	0	1	0	0	0	0	0	0
0	0	0	0	1	0	0	0	0	0	0
0	0	0	0	1	0	0	0	0	0	0
0	0	0	0	1	0	0	0	0	0	0
0	0	0	0	1	0	0	0	0	0	0
0	0	0	0	1	0	0	0	0	0	0
0	0	0	0	1	0	0	0	0	0	0
0	0	0	0	1	0	0	0	0	0	0
0	0	0	0	1	0	0	0	0	0	0
0	0	0	0	1	0	0	0	0	0	0
0	0	0	0	1	0	0	0	0	0	0
0	0	0	0	1	0	0	0	0	0	0
0	0	0	0	1	0	0	0	0	0	0
0	0	0	0	1	0	0	0	0	0	0
0	0	0	0	1	0	0	0	0	0	0
0	0	0	0	1	0	0	0	0	0	0
0	0	0	0	1	0	0	0	0	0	0
0	0	0	0	1	0	0	0	0	0	0
0	0	0	0	1	0	0	0	0	0	0
0	0	0	0	1	0	0	0	0	0	0
0	0	0	0	1	0	0	0	0	0	0
0	0	0	0	1	0	0	0	0	0	0
0	0	0	0	1	0	0	0	0	0	0
0	0	0	0	1	0	0	0	0	0	0
0	0	0	0	1	0	0	0	0	0	0
0	0	0	0	1	0	0	0	0	0	0
0	0	0	0	1	0	0	0	0	0	0
0	0	0	0	1	0	0	0	0	0	0
0	0	0	0	1	0	0	0	0	0	0
0	0	0	0	1	0	0	0	0	0	0
0	0	0	0	1	0	0	0	0	0	0
0	0	0	0	1	0	0	0	0	0	0
0	0	0	0	1	0	0	0	0	0	0
0	0	0	0	1	0	0	0	0	0	0
0	0	0	0	1	0	0	0	0	0	0
0	0	0	0	1	0	0	0	0	0	0
0	0	0	0	1	0	0	0	0	0	0
0	0	0	0	1	0	0	0	0	0	0
0	0	0	0	1	0	0	0	0	0	0
0	0	0	0	1	0	0	0	0	0	0
0	0	0	0	1	0	0	0	0	0	0
0	0	0	0	1	0	0	0	0	0	0
0	0	0	0	1	0	0	0	0	0	0
0	0	0	0	1	0	0	0	0	0	0
0	0	0	0	1	0	0	0	0	0	0
0	0	0	0	1	0	0	0	0	0	0
0	0	0	0	1	0	0	0	0	0	0
0	0	0	0	1	0	0	0	0	0	0
0	0	0	0	1	0	0	0	0	0	0
0	0	0	0	1	0	0	0	0	0	0
0	0	0	0	1	0	0	0	0	0	0
0	0	0	0	1	0	0	0	0	0	0
0	0	0	0	1	0	0	0	0	0	0
0	0	0	0	1	0	0	0	0	0	0
0	0	0	0	1	0	0	0	0	0	0
0	0	0	0	1	0	0	0	0	0	0
0	0	0	0	1	0	0	0	0	0	0
0	0	0	0	1	0	0	0	0	0	0
0	0	0	0	1	0	0	0	0	0	0
0	0	0	0	1	0	0	0	0	0	0
0	0	0	0	1	0	0	0	0	0	0
0	0	0	0	1	0	0	0	0	0	0
0	0	0	0	1	0	0	0	0	0	0
0	0	0	0	1	0	0	0	0	0	0
0	0	0	0	1	0	0	0	0	0	0
0	0	0	0	1	0	0	0	0	0	0
0	0	0	0	1	0	0	0	0	0	0
0	0	0	0	1	0	0	0	0	0	0
0	0	0	0	1	0	0	0	0	0	0
0	0	0	0	1	0	0	0	0	0	0
0	0	0	0	1	0	0	0	0	0	0
0	0	0	0	1	0	0	0	0	0	0
0	0	0	0	1	0	0	0	0	0	0
0	0	0	0	1	0	0	0	0	0	0
0	0	0	0	1	0	0	0	0	0	0
0	0	0	0	1	0	0	0	0	0	0
0	0	0	0	1	0	0	0	0	0	0
0	0	0	0	1	0	0	0	0	0	0
0	0	0	0	1	0	0	0	0	0	0
0	0	0	0	1	0	0	0	0	0	0
0	0	0	0	1	0	0	0	0	0	0
0	0	0	0	1	0	0	0	0	0	0
0	0	0	0	1	0	0	0	0	0	0
0	0	0	0	1	0	0	0	0	0	0
0	0	0	0	1	0	0	0	0	0	0
0	0	0	0	1	0	0	0	0	0	0
0	0	0	0	1	0	0	0	0	0	0
0	0	0	0	1	0	0	0	0	0	0
0	0	0	0	1	0	0	0	0	0	0
0	0	0	0	1	0	0	0	0	0	0
0	0	0	0	1	0	0	0	0	0	0
0	0	0	0	1	0	0	0	0	0	0
0	0	0	0	1	0	0	0	0	0	0
0	0	0	0	1	0	0	0	0	0	0
0	0	0	0	1	0	0	0	0	0	0
0	0	0	0	1	0	0	0	0	0	0
0	0	0	0	1	0	0	0	0	0	0
0	0	0	0	1	0	0	0	0	0	0
0	0	0	0	1	0	0	0	0	0	0
0	0	0	0	1	0	0	0	0	0	0
0	0	0	0	1	0	0	0	0	0	0
0	0	0	0	1	0	0	0	0	0	0
0	0	0	0	1	0	0	0	0	0	0
0	0	0	0	1	0	0	0	0	0	0
0	0	0	0	1	0	0	0	0	0	0
0	0	0	0	1	0	0	0	0	0	0
0	0	0	0	1	0	0	0	0	0	0
0	0	0	0	1	0	0	0	0	0	0
0	0	0	0	1	0	0	0	0	0	0
0	0	0	0	1	0	0	0	0	0	0
0	0	0	0	1	0	0	0	0	0	0
0	0	0	0	1	0	0	0	0	0	0
0	0	0	0	1	0	0	0	0	0	0
0	0	0	0	1	0	0	0	0	0	0
0	0	0	0	1	0	0	0	0	0	0
0	0	0	0	1	0	0	0	0	0	0
0	0	0	0	1	0	0	0	0	0	0
0	0	0	0	1	0	0	0	0	0	0
0	0	0	0	1	0	0	0	0	0	0
0	0	0	0	1	0	0	0	0	0	0
0	0	0	0	1	0	0	0	0	0	0
0	0	0	0	1	0	0	0	0	0	0
0	0	0	0	1	0	0	0	0	0	0
0	0	0	0	1	0	0	0	0	0	0
0	0	0	0	1	0	0	0	0	0	0
0	0	0	0	1	0	0	0	0	0	0
0	0	0	0	1	0	0	0	0	0	0
0	0	0	0	1	0	0	0	0	0	0
0	0	0	0	1	0	0	0	0	0	0
0	0	0	0	1	0	0	0	0	0	0
0	0	0	0	1	0	0	0	0	0	0
0	0	0	0	1	0	0	0	0	0	0
0	0	0	0	1	0	0	0	0	0	0
0	0	0	0	1	0	0	0	0	0	0
0	0	0	0	1	0	0	0	0	0	0
0	0	0	0	1	0	0	0	0	0	0
0	0	0	0	1	0	0	0	0	0	0
0	0	0	0	1	0	0	0	0	0	0
0	0	0	0	1	0	0	0	0	0	0
0	0	0	0	1	0	0	0	0	0	0
0	0	0	0	1	0	0	0	0	0	0
0	0	0	0	1	0	0	0	0	0	0
0	0	0	0	1	0	0	0	0	0	0
0	0	0	0	1	0	0	0	0	0	0
0	0	0	0	1	0	0	0	0	0	0
0	0	0	0	1	0	0	0	0	0	0
0	0	0	0	1	0	0	0	0	0	0
0	0	0	0	1	0	0	0	0	0	0
0	0	0	0	1	0	0	0	0	0	0
0	0	0	0	1	0	0	0	0	0	0
0	0	0	0	1	0	0	0	0	0	0
0	0	0	0	1	0	0	0	0	0	0
0	0	0	0	1	0	0	0	0	0	0
0	0	0	0	1	0	0	0	0	0	0
0	0	0	0	1	0	0	0	0	0	0
0	0	0	0	1	0	0	0	0	0	0
0	0	0	0	1	0	0	0	0	0	0
0	0	0	0	1	0	0	0	0	0	0
0	0	0	0	0.791161	0	0	0	0	0	0.208839
0	0	0	0	0.798079	0	0	0	0	0	0.201921
0	0	0	0	0.805815	0	0	0	0	0	0.194185
0	0	0	0	0.80213	0	0	0	0	0	0.19787
0	0	0	0	0.803419	0	0	0	0	0	0.196581
0	0	0	0	0.80279	0	0	0	0	0	0.19721
0	0	0	0	0.845073	0	0	0	0	0	0.154927
0	0	0	0	0.841253	0	0	0	0	0	0.158747
0	0	0	0	0.839763	0	0	0	0	0	0.160237
0	0	0	0	0.839245	0	0	0	0	0	0.160755
0	0	0	0	0.813982	0	0	0	0	0	0.186018
0	0	0	0	0.816623	0	0	0	0	0	0.183377
0	0	0	0	0.817269	0	0	0	0	0	0.182731
0	0	0	0	0.83039	0	0	0	0	0	0.16961
0	0	0	0	0.834272	0	0	0	0	0	0.165728
0	0	0	0	0.821214	0	0	0	0	0	0.178786
0	0	0	0	0.826037	0	0	0	0	0	0.173963
0	0	0	0	0.825511	0	0	0	0	0	0.174489
0	0	0	0	0.709062	0	0	0	0	0	0.290938
0	0	0	0	0.74165	0	0	0	0	0	0.25835
0	0	0	0	0.736871	0	0	0	0	0	0.263129
0	0	0	0	0.735385	0	0	0	0	0	0.264615
0	0	0	0	0.722524	0	0	0	0	0	0.277476
0	0	0	0	0.719757	0	0	0	0	0	0.280243
0	0	0	0	0.730515	0	0	0	0	0	0.269485
0	0	0	0	0.727922	0	0	0	0	0	0.272078
0	0	0	0	0.727824	0	0	0	0	0	0.272176
0	0	0	0	0.725038	0	0	0	0	0	0.274962
0	0	0	0	0.725979	0	0	0	0	0	0.274021
0	0	0	0	0.751987	0	0	0	0	0	0.248013
0	0	0	0	0.75062	0	0	0	0	0	0.24938
0	0	0	0	0.763247	0	0	0	0	0	0.236753
0	0	0	0	0.768348	0	0	0	0	0	0.231652
0	0	0	0	0.767762	0	0	0	0	0	0.232238
0	0	0	0	0.784255	0	0	0	0	0	0.215745
0	0	0	0	0.776934	0	0	0	0	0	0.223066
0	0	0	0	0.778004	0	0	0	0	0	0.221996
0	0	0	0	0.500741	0	0	0	0	0	0.499259
0	0	0	0	0.644841	0	0	0	0	0	0.355159
0	0	0	0	0.635353	0	0	0	0	0	0.364647
0	0	0	0	0.640467	0	0	0	0	0	0.359533
0	0	0	0	0.639204	0	0	0	0	0	0.360796
0	0	0	0	0.680525	0	0	0	0	0	0.319475
0	0	0	0	0.663268	0	0	0	0	0	0.336732
0	0	0	0	0.66301	0	0	0	0	0	0.33699
0	0	0	0	0.609701	0	0	0	0	0	0.390299
0	0	0	0	0.57336	0	0	0	0	0	0.42664
0	0	0	0	0.334613	0	0	0	0.665387	0	0
0	0.258606	0	0	0.204055	0	0	0	0.537339	0	0
0	0	0	0	0.385134	0	0.2749	0	0.339966	0	0
0	0	0	0	0.641486	0	0	0	0.358514	0	0
0	0	0	0	0.364256	0	0	0	0.322501	0	0.313243
0	0	0	0	0.59476	0	0	0	0.246623	0	0.158616
0	0	0	0	0.547673	0	0	0	0.237995	0	0.214332
0	0	0	0	0.512959	0	0	0	0.29122	0	0.195821
0	0.417841	0	0	0.288173	0	0.293986	0	0	0	0
0	0.399142	0	0	0.311709	0	0.289149	0	0	0	0
0	0.331861	0	0	0.383239	0	0.2849	0	0	0	0
0	0.261183	0	0	0.404116	0	0.334702	0	0	0	0
0	0.212201	0	0	0.280602	0	0.243858	0	0	0	0.263339
0	0.220743	0	0	0.318491	0	0.239673	0	0	0	0.221093
0	0	0	0	0.346443	0	0.292367	0	0	0	0.36119
0	0	0	0	0.425927	0	0.302549	0	0	0	0.271524
0	0	0	0	0.448402	0	0.291584	0	0	0	0.260014
0	0	0	0	0.320957	0	0.679043	0	0	0	0
0	0	0	0	0.436142	0	0.563858	0	0	0	0
0	0	0.253969	0	0.345848	0	0.400184	0	0	0	0
0	0	0.291436	0	0.310015	0	0.398549	0	0	0	0
0	0	0.29727	0	0.341474	0	0.361256	0	0	0	0
0	0	0.231828	0	0.44835	0	0.319823	0	0	0	0
0	0	0.22649	0	0.529157	0	0.244353	0	0	0	0
0	0	0.214907	0	0.521598	0	0.263495	0	0	0	0
0.319726	0.427063	0	0	0.253211	0	0	0	0	0	0
0.367098	0	0	0	0.365991	0	0	0	0	0	0.266911
0.227549	0	0	0	0.457399	0	0	0	0	0	0.315051
0.287984	0	0	0	0.332383	0	0	0	0	0	0.379633
0.238964	0	0	0	0.333471	0	0	0	0	0	0.427565
0	0	0	0	0	0	0	1	0	0	0
0	0	0	0	0	0	0	1	0	0	0
0	0	0	0	0	0	0	1	0	0	0
0	0	0	0	0	0	0	1	0	0	0
0	0	0	0	0	0	0	1	0	0	0
0	0	0	0	0	0	0	1	0	0	0
0	0	0	0	0	0	0	1	0	0	0
0	0	0	0	0	0	0	1	0	0	0
0	0	0	0	0	0	0	1	0	0	0
0	0	0	0	0	0	0	1	0	0	0
0	0	0	0	0	0	0	1	0	0	0
0	0	0	0	0	0	0	1	0	0	0
0	0	0	0	0	0	0	1	0	0	0
0	0	0	0	0	0	0	1	0	0	0
0	0	0	0	0	0	0	1	0	0	0
0	0	0	0	0	0	0	1	0	0	0
0	0	0	0	0	0	0	1	0	0	0
0	0	0	0	0	0	0	1	0	0	0
0	0	0	0	0	0	0	1	0	0	0
0	0	0	0	0	0	0	1	0	0	0
0	0	0	0	0	0	0	1	0	0	0
0	0	0	0	0	0	0	1	0	0	0
0	0	0	0	0	0	0	1	0	0	0
0	0	0	0	0	0	0	1	0	0	0
0	0	0	0	0	0	0	1	0	0	0
0	0	0	0	0	0	0	1	0	0	0
0	0	0	0	0	0	0	1	0	0	0
0	0	0	0	0	0	0	1	0	0	0
0	0	0	0	0	0	0	1	0	0	0
0	0	0	0	0	0	0	1	0	0	0
0	0	0	0	0	0	0	1	0	0	0
0	0	0	0	0	0	0	1	0	0	0
0	0	0	0	0	0	0	1	0	0	0
0	0	0	0	0	0	0	1	0	0	0
0	0	0	0	0	0	0	1	0	0	0
0	0	0	0	0	0	0	1	0	0	0
0	0	0	0	0	0	0	1	0	0	0
0	0	0	0	0	0	0	1	0	0	0
0	0	0	0	0	0	0	1	0	0	0
0	0	0	0	0	0	0	1	0	0	0
0	0	0	0	0	0	0	1	0	0	0
0	0	0	0	0	0	0	1	0	0	0
0	0	0	0	0	0	0	1	0	0	0
0	0	0	0	0	0	0	1	0	0	0
0	0	0	0	0	0	0	1	0	0	0
0	0	0	0	0	0	0	1	0	0	0
0	0	0	0	0	0	0	1	0	0	0
0	0	0	0	0	0	0	1	0	0	0
0	0	0	0	0	0	0	1	0	0	0
0	0	0	0	0	0	0	1	0	0	0
0	0	0	0	0	0	0	1	0	0	0
0	0	0	0	0	0	0	1	0	0	0
0	0	0	0	0	0	0	1	0	0	0
0	0	0	0	0	0	0	1	0	0	0
0	0	0	0	0	0	0	1	0	0	0
0	0	0	0	0	0	0	1	0	0	0
0	0	0	0	0	0	0	1	0	0	0
0	0	0	0	0	0	0	1	0	0	0
0	0	0	0	0	0	0	1	0	0	0
0	0	0	0	0	0	0	1	0	0	0
0	0	0	0	0	0	0	1	0	0	0
0	0	0	0	0	0	0	1	0	0	0
0	0	0	0	0	0	0	1	0	0	0
0	0	0	0	0	0	0	1	0	0	0
0	0	0	0	0	0	0	1	0	0	0
0	0	0	0	0	0	0	1	0	0	0
0	0	0	0	0	0	0	1	0	0	0
0	0	0	0	0	0	0	1	0	0	0
0	0	0	0	0	0	0	1	0	0	0
0	0	0	0	0	0	0	1	0	0	0
0	0	0	0	0	0	0	1	0	0	0
0	0	0	0	0	0	0	1	0	0	0
0	0	0	0	0	0	0	1	0	0	0
0	0	0	0	0	0	0	1	0	0	0
0	0	0	0	0	0	0	1	0	0	0
0	0	0	0	0	0	0	1	0	0	0
0	0	0	0	0	0	0	1	0	0	0
0	0	0	0	0	0	0	1	0	0	0
0	0	0	0	0	0	0	1	0	0	0
0	0	0	0	0	0	0	1	0	0	0
0	0	0	0	0	0	0	1	0	0	0
0	0	0	0	0	0	0	1	0	0	0
0	0	0	0	0	0	0	1	0	0	0
0	0	0	0	0	0	0	1	0	0	0
0	0	0	0	0	0	0	1	0	0	0
0	0	0	0	0	0	0	1	0	0	0
0	0	0	0	0	0	0	1	0	0	0
0	0	0	0	0	0	0	1	0	0	0
0	0	0	0	0	0	0	1	0	0	0
0	0	0	0	0	0	0	1	0	0	0
0	0	0	0	0	0	0	1	0	0	0
0	0	0	0	0	0	0	1	0	0	0
0	0	0	0	0	0	0	1	0	0	0
0	0	0	0	0	0	0	1	0	0	0
0	0	0	0	0	0	0	1	0	0	0
0	0	0	0	0	0	0	1	0	0	0
0	0	0	0	0	0	0	1	0	0	0
0	0	0	0	0	0	0	1	0	0	0
0	0	0	0	0	0	0	1	0	0	0
0	0	0	0	0	0	0	1	0	0	0
0	0	0	0	0	0	0	1	0	0	0
0	0	0	0	0	0	0	1	0	0	0
0	0	0	0	0	0	0	1	0	0	0
0	0	0	0	0	0	0	1	0	0	0
0	0	0	0	0	0	0	1	0	0	0
0	0	0	0	0	0	0	1	0	0	0
0	0	0	0	0	0	0	1	0	0	0
0	0	0	0	0	0	0	1	0	0	0
0	0	0	0	0	0	0	1	0	0	0
0	0	0	0	0	0	0	1	0	0	0
0	0	0	0	0	0	0	1	0	0	0
0	0	0	0	0	0	0	1	0	0	0
0	0	0	0	0	0	0	1	0	0	0
0	0	0	0	0	0	0	1	0	0	0
0	0	0	0	0	0	0	1	0	0	0
0	0	0	0	0	0	0	1	0	0	0
0	0	0	0	0	0	0	1	0	0	0
0	0	0	0	0	0	0	1	0	0	0
0	0	0	0	0	0	0	1	0	0	0
0	0	0	0	0	0	0	1	0	0	0
0	0	0	0	0	0	0	1	0	0	0
0	0	0	0	0	0	0	1	0	0	0
0	0	0	0	0	0	0	1	0	0	0
0	0	0	0	0	0	0	1	0	0	0
0	0	0	0	0	0	0	1	0	0	0
0	0	0	0	0	0	0	1	0	0	0
0	0	0	0	0	0	0	1	0	0	0
0	0	0	0	0	0	0	1	0	0	0
0	0	0	0	0	0	0	1	0	0	0
0	0	0	0	0	0	0	1	0	0	0
0	0	0	0	0	0	0	1	0	0	0
0	0	0	0	0	0	0	1	0	0	0
0	0	0	0	0	0	0	1	0	0	0
0	0	0	0	0	0	0	1	0	0	0
0	0	0	0	0	0	0	1	0	0	0
0	0	0	0	0	0	0	1	0	0	0
0	0	0	0	0	0	0	1	0	0	0
0	0	0	0	0	0	0	1	0	0	0
0	0	0	0	0	0	0	1	0	0	0
0	0	0	0	0	0	0	1	0	0	0
0	0	0	0	0	0	0	1	0	0	0
0	0	0	0	0	0	0	1	0	0	0
0	0	0	0	0	0	0	1	0	0	0
0	0	0	0	0	0	0	1	0	0	0
0	0	0	0	0	0	0	1	0	0	0
0	0	0	0	0	0	0	1	0	0	0
0	0	0	0	0	0	0	1	0	0	0
0	0	0	0	0	0	0	1	0	0	0
0	0	0	0	0	0	0	1	0	0	0
0	0	0	0	0	0	0	1	0	0	0
0	0	0	0	0	0	0	1	0	0	0
0	0	0	0	0	0	0	1	0	0	0
0	0	0	0	0	0	0	1	0	0	0
0	0	0	0	0	0	0	1	0	0	0
0	0	0	0	0	0	0	1	0	0	0
0	0	0	0	0	0	0	1	0	0	0
0	0	0	0	0	0	0	1	0	0	0
0	0	0	0	0	0	0	1	0	0	0
0	0	0	0	0	0	0	1	0	0	0
0	0	0	0	0	0	0	1	0	0	0
0	0	0	0	0	0	0	1	0	0	0
0	0	0	0	0	0	0	1	0	0	0
0	0	0	0	0	0	0	1	0	0	0
0	0	0	0	0	0	0	1	0	0	0
0	0	0	0	0	0	0	1	0	0	0
0	0	0	0	0	0	0	1	0	0	0
0	0	0	0	0	0	0	1	0	0	0
0	0	0	0	0	0	0	1	0	0	0
0	0	0	0	0	0	0	1	0	0	0
0	0	0	0	0	0	0	1	0	0	0
0	0	0	0	0	0	0	1	0	0	0
0	0	0	0	0	0	0	1	0	0	0
0	0	0	0	0	0	0	1	0	0	0
0	0	0	0	0	0	0	1	0	0	0
0	0	0	0	0	0	0	1	0	0	0
0	0	0	0	0	0	0	1	0	0	0
0	0	0	0	0	0	0	1	0	0	0
0	0	0	0	0	0	0	1	0	0	0
0	0	0	0	0	0	0	1	0	0	0
0	0	0	0	0	0	0	1	0	0	0
0	0	0	0	0	0	0	1	0	0	0
0	0	0	0	0	0	0	1	0	0	0
0	0	0	0	0	0	0	1	0	0	0
0	0	0	0	0	0	0	1	0	0	0
0	0	0	0	0	0	0	1	0	0	0
0	0	0	0	0	0	0	1	0	0	0
0	0	0	0	0	0	0	1	0	0	0
0	0	0	0	0	0	0	1	0	0	0
0	0	0	0	0	0	0	1	0	0	0
0	0	0	0	0	0	0	1	0	0	0
0	0	0	0	0	0	0	1	0	0	0
0	0	0	0	0	0	0	1	0	0	0
0	0	0	0	0	0	0	1	0	0	0
0	0	0	0	0	0	0	1	0	0	0
0	0	0	0	0	0	0	1	0	0	0
0	0	0	0	0	0	0	1	0	0	0
0	0	0	0	0	0	0	1	0	0	0
0	0	0	0	0	0	0	1	0	0	0
0	0	0	0	0	0	0	1	0	0	0
0	0	0	0	0	0	0	1	0	0	0
0	0	0	0	0	0	0	1	0	0	0
0	0	0	0	0	0	0	1	0	0	0
0	0	0	0	0	0	0	1	0	0	0
0	0	0	0	0	0	0	1	0	0	0
0	0	0	0	0	0	0	1	0	0	0
0	0	0	0	0	0	0	1	0	0	0
0	0	0	0	0	0	0	1	0	0	0
0	0	0	0	0	0	0	1	0	0	0
0	0	0	0	0	0	0	1	0	0	0
0	0	0	0	0	0	0	1	0	0	0
0	0	0	0	0	0	0	1	0	0	0
0	0	0	0	0	0	0	1	0	0	0
0	0	0	0	0	0	0	1	0	0	0
0	0	0	0	0	0	0	1	0	0	0
0	0	0	0	0	0	0	1	0	0	0
0	0	0	0	0	0	0	1	0	0	0
0	0	0	0	0	0	0	1	0	0	0
0	0	0	0	0	0	0	1	0	0	0
0	0	0	0	0	0	0	1	0	0	0
0	0	0	0	0	0	0	1	0	0	0
0	0	0	0	0	0	0	1	0	0	0
0	0	0	0	0	0	0	1	0	0	0
0	0	0	0	0	0	0	1	0	0	0
0	0	0	0	0	0	0	1	0	0	0
0	0	0	0	0	0	0	1	0	0	0
0	0	0	0	0	0	0	1	0	0	0
0	0	0	0	0	0	0	1	0	0	0
0	0	0	0	0	0	0	1	0	0	0
0	0	0	0	0	0	0	1	0	0	0
0	0	0	0	0	0	0	1	0	0	0
0	0	0	0	0	0	0	1	0	0	0
0	0	0	0	0	0	0	1	0	0	0
0	0	0	0	0	0	0	1	0	0	0
0	0	0	0	0	0	0	1	0	0	0
0	0	0	0	0	0	0	1	0	0	0
0	0	0	0	0	0	0	1	0	0	0
0	0	0	0	0	0	0	1	0	0	0
0	0	0	0	0	0	0	1	0	0	0
0	0	0	0	0	0	0	1	0	0	0
0	0	0	0	0	0	0	1	0	0	0
0	0	0	0	0	0	0	1	0	0	0
0	0	0	0	0	0	0	1	0	0	0
0	0	0	0	0	0	0	1	0	0	0
0	0	0	0	0	0	0	1	0	0	0
0	0	0	0	0	0	0	1	0	0	0
0	0	0	0	0	0	0	1	0	0	0
0	0	0	0	0	0	0	1	0	0	0
0	0	0	0	0	0	0	1	0	0	0
0	0	0	0	0	0	0	1	0	0	0
0	0	0	0	0	0	0	1	0	0	0
0	0	0	0	0	0	0	1	0	0	0
0	0	0	0	0	0	0	1	0	0	0
0	0	0	0	0	0	0	1	0	0	0
0	0	0	0	0	0	0	1	0	0	0
0	0	0	0	0	0	0	1	0	0	0
0	0	0	0	0	0	0	1	0	0	0
0	0	0	0	0	0	0	1	0	0	0
0	0	0	0	0	0	0	1	0	0	0
0	0	0	0	0	0	0	1	0	0	0
0	0	0	0	0	0	0	1	0	0	0
0	0	0	0	0	0	0	1	0	0	0
0	0	0	0	0	0	0	1	0	0	0
0	0	0	0	0	0	0	1	0	0	0
0	0	0	0	0	0	0	1	0	0	0
0	0	0	0	0	0	0	1	0	0	0
0	0	0	0	0	0	0	1	0	0	0
0	0	0	0	0	0	0	1	0	0	0
0	0	0	0	0	0	0	1	0	0	0
0	0	0	0	0	0	0	1	0	0	0
0	0	0	0	0	0	0	1	0	0	0
0.211268	0	0	0	0	0	0	0.788732	0	0	0
0.206795	0	0	0	0	0	0	0.793205	0	0	0
0.207582	0	0	0	0	0	0	0.792418	0	0	0
0.20809	0	0	0	0	0	0	0.79191	0	0	0
0.208389	0	0	0	0	0	0	0.791611	0	0	0
0.200992	0	0	0	0	0	0	0.799008	0	0	0
0.196183	0	0	0	0	0	0	0.803817	0	0	0
0.245351	0	0	0	0	0	0	0.754649	0	0	0
0.2226	0	0	0	0	0	0	0.7774	0	0	0
0.229791	0	0	0	0	0	0	0.770209	0	0	0
0.229802	0	0	0	0	0	0	0.770198	0	0	0
0.233583	0	0	0	0	0	0	0.766417	0	0	0
0.234512	0	0	0	0	0	0	0.765488	0	0	0
0.138739	0	0	0	0	0	0	0.861261	0	0	0
0.133977	0	0	0	0	0	0	0.866023	0	0	0
0.129109	0	0	0	0	0	0	0.870891	0	0	0
0.129952	0	0	0	0	0	0	0.870048	0	0	0
0.188521	0	0	0	0	0	0	0.811479	0	0	0
0.178392	0	0	0	0	0	0	0.821608	0	0	0
0.183381	0	0	0	0	0	0	0.816619	0	0	0
0.155264	0	0	0	0	0	0	0.844736	0	0	0
0.15684	0	0	0	0	0	0	0.84316	0	0	0
0.171267	0	0	0	0	0	0	0.828733	0	0	0
0.168423	0	0	0	0	0	0	0.831577	0	0	0
0.167283	0	0	0	0	0	0	0.832717	0	0	0
0	0	0	0.172416	0	0	0	0.827584	0	0	0
0	0	0	0.171369	0	0	0	0.828631	0	0	0
0	0	0	0.163215	0	0	0	0.836785	0	0	0
0	0	0	0.164451	0	0	0	0.835549	0	0	0
0	0	0	0.164131	0	0	0	0.835869	0	0	0
0	0	0	0.180018	0	0	0	0.819982	0	0	0
0	0	0	0.179341	0	0	0	0.820659	0	0	0
0	0	0	0.183802	0	0	0	0.816198	0	0	0
0	0	0	0.182373	0	0	0	0.817627	0	0	0
0	0	0	0.18741	0	0	0	0.81259	0	0	0
0	0	0	0.187999	0	0	0	0.812001	0	0	0
0	0	0	0.187714	0	0	0	0.812286	0	0	0
0	0	0	0.196901	0	0	0	0.803099	0	0	0
0	0	0	0.192009	0	0	0	0.807991	0	0	0
0	0	0	0.193576	0	0	0	0.806424	0	0	0
0	0	0	0.193446	0	0	0	0.806554	0	0	0
0	0	0	0.205894	0	0	0	0.794106	0	0	0
0	0	0	0.206097	0	0	0	0.793903	0	0	0
0	0	0	0.20344	0	0	0	0.79656	0	0	0
0	0	0	0.203135	0	0	0	0.796865	0	0	0
0	0	0	0.201376	0	0	0	0.798624	0	0	0
0	0	0	0.202249	0	0	0	0.797751	0	0	0
0	0	0	0.202047	0	0	0	0.797953	0	0	0
0	0	0	0.216345	0	0	0	0.783655	0	0	0
0	0	0	0.211435	0	0	0	0.788565	0	0	0
0	0	0	0.213207	0	0	0	0.786793	0	0	0
0	0	0	0.212814	0	0	0	0.787186	0	0	0
0	0	0	0.333607	0	0	0	0.666393	0	0	0
0	0	0	0.331091	0	0	0	0.668909	0	0	0
0	0	0	0.330736	0	0	0	0.669264	0	0	0
0	0	0	0.322711	0	0	0	0.677289	0	0	0
0	0	0	0.327186	0	0	0	0.672814	0	0	0
0	0	0	0.295008	0	0	0	0.704992	0	0	0
0	0	0	0.295729	0	0	0	0.704271	0	0	0
0	0	0	0.292037	0	0	0	0.707963	0	0	0
0	0	0	0.291252	0	0	0	0.708748	0	0	0
0	0	0	0.305329	0	0	0	0.694671	0	0	0
0	0	0	0.305821	0	0	0	0.694179	0	0	0
0	0	0	0.31762	0	0	0	0.68238	0	0	0
0	0	0	0.310342	0	0	0	0.689658	0	0	0
0	0	0	0.312852	0	0	0	0.687148	0	0	0
0	0	0	0.312549	0	0	0	0.687451	0	0	0
0	0	0	0.227427	0	0	0	0.772573	0	0	0
0	0	0	0.224569	0	0	0	0.775431	0	0	0
0	0	0	0.224028	0	0	0	0.775972	0	0	0
0	0	0	0.238141	0	0	0	0.761859	0	0	0
0	0	0	0.237696	0	0	0	0.762304	0	0	0
0	0	0	0.237183	0	0	0	0.762817	0	0	0
0	0	0	0.236609	0	0	0	0.763391	0	0	0
0	0	0	0.234769	0	0	0	0.765231	0	0	0
0	0	0	0.233463	0	0	0	0.766537	0	0	0
0	0	0	0.233354	0	0	0	0.766646	0	0	0
0	0	0	0.244681	0	0	0	0.755319	0	0	0
0	0	0	0.24096	0	0	0	0.75904	0	0	0
0	0	0	0.24845	0	0	0	0.75155	0	0	0
0	0	0	0.250891	0	0	0	0.749109	0	0	0
0	0	0	0.250606	0	0	0	0.749394	0	0	0
0	0	0	0.255155	0	0	0	0.744845	0	0	0
0	0	0	0.260818	0	0	0	0.739182	0	0	0
0	0	0	0.258997	0	0	0	0.741003	0	0	0
0	0	0	0.259018	0	0	0	0.740982	0	0	0
0	0	0	0.264948	0	0	0	0.735052	0	0	0
0	0	0	0.26827	0	0	0	0.73173	0	0	0
0	0	0	0.269961	0	0	0	0.730039	0	0	0
0	0	0	0.271078	0	0	0	0.728922	0	0	0
0	0	0	0.286134	0	0	0	0.713866	0	0	0
0	0	0	0.276261	0	0	0	0.723739	0	0	0
0	0	0	0.281013	0	0	0	0.718987	0	0	0
0	0	0	0.278721	0	0	0	0.721279	0	0	0
0	0	0	0.279168	0	0	0	0.720832	0	0	0
0	0	0	0.35008	0	0	0	0.64992	0	0	0
0	0	0	0.344537	0	0	0	0.655463	0	0	0
0	0	0	0.357285	0	0	0	0.642715	0	0	0
0	0	0	0.358322	0	0	0	0.641678	0	0	0
0	0	0	0.3593	0	0	0	0.6407	0	0	0
0	0	0	0.364108	0	0	0	0.635893	0	0	0
0	0	0	0.369138	0	0	0	0.630862	0	0	0
0	0	0	0.3686	0	0	0	0.6314	0	0	0
0	0	0	0.425517	0	0	0	0.574483	0	0	0
0	0	0	0.407388	0	0	0	0.592612	0	0	0
0	0	0	0.413528	0	0	0	0.586472	0	0	0
0	0	0	0.413908	0	0	0	0.586092	0	0	0
0	0	0	0.39707	0	0	0	0.60293	0	0	0
0	0	0	0.397487	0	0	0	0.602513	0	0	0
0	0	0	0.384981	0	0	0	0.615019	0	0	0
0	0	0	0.378554	0	0	0	0.621446	0	0	0
0	0	0	0.379993	0	0	0	0.620008	0	0	0
0	0	0	0.499524	0	0	0	0.500476	0	0	0
0	0	0	0.521223	0	0	0	0.478777	0	0	0
0	0	0	0.508489	0	0	0	0.491511	0	0	0
0	0	0	0.514972	0	0	0	0.485028	0	0	0
0	0	0	0.512995	0	0	0	0.487005	0	0	0
0	0	0	0.447696	0	0	0	0.552304	0	0	0
0	0	0	0.449017	0	0	0	0.550983	0	0	0
0	0	0	0.438617	0	0	0	0.561383	0	0	0
0	0	0	0.444176	0	0	0	0.555824	0	0	0
0	0	0	0.442586	0	0	0	0.557414	0	0	0
0	0	0	0.441951	0	0	0	0.558049	0	0	0
0	0	0	0.479521	0	0	0	0.520479	0	0	0
0	0	0	0.480472	0	0	0	0.519528	0	0	0
0	0	0	0.462972	0	0	0	0.537028	0	0	0
0	0	0	0.465639	0	0	0	0.534361	0	0	0
0	0	0	0.465098	0	0	0	0.534902	0	0	0
0	0	0.261288	0	0	0	0	0.588035	0	0	0.150677
0	0	0.369715	0	0	0	0	0.630285	0	0	0
0	0	0.365761	0	0	0	0	0.634239	0	0	0
0	0	0.364811	0	0	0	0	0.635189	0	0	0
0	0	0.335873	0	0	0	0	0.664127	0	0	0
0	0	0.355967	0	0	0	0	0.644033	0	0	0
0	0	0.35591	0	0	0	0	0.64409	0	0	0
0	0	0.343879	0	0	0	0	0.65612	0	0	0
0	0	0.349336	0	0	0	0	0.650663	0	0	0
0	0	0.347028	0	0	0	0	0.652972	0	0	0
0	0	0.407464	0	0	0	0	0.592536	0	0	0
0	0	0.411413	0	0	0	0	0.588587	0	0	0
0	0	0.414286	0	0	0	0	0.585714	0	0	0
0	0	0.414236	0	0	0	0	0.585764	0	0	0
0	0	0.38529	0	0	0	0	0.61471	0	0	0
0	0	0.386421	0	0	0	0	0.613579	0	0	0
0	0	0.387243	0	0	0	0	0.612757	0	0	0
0	0	0.399313	0	0	0	0	0.600687	0	0	0
0	0	0.39466	0	0	0	0	0.60534	0	0	0
0	0	0.269265	0	0	0	0	0.730735	0	0	0
0	0	0.283865	0	0	0	0	0.716135	0	0	0
0	0	0.27892	0	0	0	0	0.72108	0	0	0
0	0	0.275932	0	0	0	0	0.724068	0	0	0
0	0	0.276166	0	0	0	0	0.723834	0	0	0
0	0	0.276076	0	0	0	0	0.723924	0	0	0
0	0	0.325189	0	0	0	0	0.674811	0	0	0
0	0	0.317013	0	0	0	0	0.682987	0	0	0
0	0	0.318548	0	0	0	0	0.681452	0	0	0
0	0	0.319624	0	0	0	0	0.680376	0	0	0
0	0	0.306568	0	0	0	0	0.693432	0	0	0
0	0	0.310743	0	0	0	0	0.689257	0	0	0
0	0	0.309018	0	0	0	0	0.690982	0	0	0
0	0	0.292363	0	0	0	0	0.707637	0	0	0
0	0	0.301207	0	0	0	0	0.698793	0	0	0
0	0	0.298939	0	0	0	0	0.701061	0	0	0
0	0	0.298946	0	0	0	0	0.701054	0	0	0
0	0	0.198996	0	0	0	0	0.801004	0	0	0
0	0	0.20999	0	0	0	0	0.79001	0	0	0
0	0	0.205267	0	0	0	0	0.794733	0	0	0
0	0	0.205276	0	0	0	0	0.794724	0	0	0
0	0	0.221471	0	0	0	0	0.778529	0	0	0
0	0	0.229596	0	0	0	0	0.770404	0	0	0
0	0	0.255747	0	0	0	0	0.744253	0	0	0
0	0	0.25223	0	0	0	0	0.74777	0	0	0
0	0	0.244405	0	0	0	0	0.755595	0	0	0
0	0	0.237342	0	0	0	0	0.762659	0	0	0
0	0	0.24083	0	0	0	0	0.75917	0	0	0
0	0	0.194038	0.254876	0	0	0	0.377521	0	0	0.173564
0	0	0.233617	0.174407	0	0	0	0.591976	0	0	0
0	0	0.233679	0.163154	0	0	0	0.603167	0	0	0
0	0	0.18952	0.162839	0	0	0	0.647641	0	0	0
0	0	0.204336	0.163001	0	0	0	0.632663	0	0	0
0	0	0.182141	0.187679	0	0	0	0.63018	0	0	0
0	0	0.177843	0.207577	0	0	0	0.61458	0	0	0
0	0	0.177006	0.204481	0	0	0	0.618514	0	0	0
0	0	0.246022	0.263909	0	0	0	0.490069	0	0	0
0	0	0.228191	0.2534	0	0	0	0.518409	0	0	0
0	0	0.226116	0.247007	0	0	0	0.526877	0	0	0
0	0	0.220222	0.241533	0	0	0	0.538245	0	0	0
0	0	0.22237	0.232921	0	0	0	0.544708	0	0	0
0	0	0.188748	0.280385	0	0	0	0.530867	0	0	0
0	0	0.186606	0.284158	0	0	0	0.529236	0	0	0
0	0	0.186261	0.254695	0	0	0	0.559044	0	0	0
0	0	0.182889	0.243128	0	0	0	0.573983	0	0	0
0	0	0.188568	0.236977	0	0	0	0.574456	0	0	0
0	0	0.277933	0.214689	0	0	0	0.507378	0	0	0
0	0	0.287713	0.199957	0	0	0	0.512329	0	0	0
0	0	0.2872	0.206531	0	0	0	0.506268	0	0	0
0	0	0.275671	0.235771	0	0	0	0.488557	0	0	0
0	0	0.289434	0.234016	0	0	0	0.476549	0	0	0
0	0	0.257387	0.201782	0	0	0	0.540831	0	0	0
0	0	0.293585	0.167785	0	0	0	0.53863	0	0	0
0	0	0.265583	0.169448	0	0	0	0.564969	0	0	0
0	0	0.27653	0.176883	0	0	0	0.546587	0	0	0
0	0	0.273578	0.172473	0	0	0	0.553949	0	0	0
0	0	0.381632	0.188452	0	0	0	0.429917	0	0	0
0	0	0.360268	0.177338	0	0	0	0.462394	0	0	0
0	0	0.392918	0.240209	0	0	0	0.366873	0	0	0
0	0	0.384911	0.267627	0	0	0	0.347462	0	0	0
0	0	0.387331	0.275252	0	0	0	0.337417	0	0	0
0	0	0.291455	0.262185	0	0	0	0.44636	0	0	0
0	0	0.368985	0.232864	0	0	0	0.398151	0	0	0
0	0	0.348002	0.22282	0	0	0	0.429178	0	0	0
0	0	0.322911	0.250072	0	0	0	0.427017	0	0	0
0	0	0.33566	0.258081	0	0	0	0.406259	0	0	0
0	0	0.326396	0.257547	0	0	0	0.416057	0	0	0
0	0	0.312869	0.282846	0	0	0	0.404285	0	0	0
0	0	0.336946	0.284514	0	0	0	0.37854	0	0	0
0	0	0.341204	0.268631	0	0	0	0.390164	0	0	0
0	0	0.279582	0.379981	0	0	0	0.340437	0	0	0
0	0	0.276099	0.36398	0	0	0	0.359921	0	0	0
0	0	0.284421	0.357632	0	0	0	0.357947	0	0	0
0	0	0.225834	0.423417	0	0	0	0.350749	0	0	0
0	0	0.273812	0.40161	0	0	0	0.324579	0	0	0
0	0	0.25214	0.420821	0	0	0	0.32704	0	0	0
0	0	0.247865	0.334158	0	0	0	0.417977	0	0	0
0	0	0.255517	0.302618	0	0	0	0.441865	0	0	0
0	0	0.223386	0.319409	0	0	0	0.457205	0	0	0
0	0	0.190153	0.361636	0	0	0	0.448211	0	0	0
0	0	0.21541	0.377278	0	0	0	0.407312	0	0	0
0	0	0.191818	0.400735	0	0	0	0.407447	0	0	0
0	0	0.176709	0.41875	0	0	0	0.404542	0	0	0
0.16779	0	0	0	0	0.341312	0	0	0	0	0.490898
0.200223	0	0	0	0	0.407598	0	0	0	0	0.392179
0	0	0	0	0	0.304419	0	0	0	0	0.695581
0	0	0	0	0	0.311106	0	0	0	0	0.688894
0	0	0	0	0	0.555288	0	0	0	0	0.444712
0	0	0	0	0	0.488165	0	0	0	0	0.511835
0	0	0	0	0	0.405256	0	0	0	0	0.594744
0	0	0	0	0	0.415592	0	0	0	0	0.584408
0	0	0	0	0	0.428172	0	0	0	0	0.571828
0	0	0	0	0	0.436846	0	0	0	0	0.563154
0	0	0	0	0	0.443346	0	0	0	0	0.556654
0	0	0	0	0	0	0.391987	0.265381	0	0	0.342632
0	0	0	0	0	0	0.291429	0	0	0	0.708571
0	0	0	0	0	0	0.286943	0	0	0	0.713057
0	0	0	0	0	0	0.349839	0	0	0	0.650161
0	0	0	0	0	0	0.328806	0	0	0	0.671194
0	0	0	0	0	0	0.325026	0	0	0	0.674974
0	0	0	0	0	0	0.322056	0	0	0	0.677944
0	0	0	0	0.229371	0	0.357487	0	0	0	0.413142
0	0	0	0	0.219722	0	0.272028	0	0	0	0.508251
0	0	0	0	0.146704	0	0.277377	0	0	0	0.575919
0	0	0	0	0.145879	0	0.325021	0	0	0	0.5291
0	0.252279	0	0	0	0	0.298039	0	0	0	0.449681
0	0.23978	0	0	0	0	0.221298	0	0	0	0.538922
0	0.22911	0	0	0	0	0.225993	0	0	0	0.544896
0	0.233126	0	0	0	0	0.220019	0	0	0	0.546855
0	0.217798	0	0	0	0	0.232236	0	0	0	0.549966
0	0.214645	0	0	0	0	0.231105	0	0	0	0.55425
0	0.224236	0	0	0	0	0.232008	0	0	0	0.543756
0	0.219536	0	0	0	0	0.239826	0	0	0	0.540638
0	0.207066	0	0	0	0	0.219097	0	0	0	0.573837
0	0.22733	0	0	0	0	0.207368	0	0	0	0.565302
0	0.224073	0	0	0	0	0.216181	0	0	0	0.559746
0	0.248386	0	0	0	0	0.230493	0	0	0	0.52112
0	0.255774	0	0	0	0	0.224842	0	0	0	0.519384
0	0.236469	0	0	0	0	0.261318	0	0	0	0.502213
0	0.24264	0	0	0	0	0.250681	0	0	0	0.50668
0	0.284873	0	0	0	0	0	0	0	0	0.715127
0	0.27407	0	0	0	0	0	0	0	0	0.72593
0	0.389587	0	0	0	0	0	0	0	0	0.610413
0	0.356181	0	0	0	0	0	0	0	0	0.643819
0	0.366798	0	0	0	0	0	0	0	0	0.633202
0	0.36233	0	0	0	0	0	0	0	0	0.63767
0.279832	0	0	0	0	0	0	0	0	0	0.720168
0.273783	0	0	0	0	0	0	0	0	0	0.726217
0.214953	0	0	0	0	0	0	0	0	0	0.785047
0.236523	0	0	0	0	0	0	0	0	0	0.763477
0.388772	0	0	0	0	0	0	0	0	0	0.611228
0.522989	0	0	0	0	0	0	0	0	0	0.477011
0.483161	0	0	0	0	0	0	0	0	0	0.516839
0	0	0	0.321464	0	0	0	0	0	0	0.678536
0	0	0	0.308869	0	0	0	0	0	0	0.691131
0	0	0	0.313303	0	0	0	0	0	0	0.686697
0	0	0	0	0	0	0	0	0	0	1
0	0	0	0	0	0	0	0	0	0	1
0	0	0	0	0	0	0	0	0	0	1
0	0	0	0	0	0	0	0	0	0	1
0	0	0	0	0	0	0	0	0	0	1
0	0	0	0	0	0	0	0	0	0	1
0	0	0	0	0	0	0	0	0	0	1
0	0	0	0	0	0	0	0	0	0	1
0	0	0	0	0	0	0	0	0	0	1
0	0	0	0	0	0	0	0	0	0	1
0	0	0	0	0	0	0	0	0	0	1
0	0	0	0	0	0	0	0	0	0	1
0	0	0	0	0	0	0	0	0	0	1
0	0	0	0	0	0	0	0	0	0	1
0	0	0	0	0	0	0	0	0	0	1
0	0	0	0	0	0	0	0	0	0	1
0	0	0	0	0	0	0	0	0	0	1
0	0	0	0	0	0	0	0	0	0	1
0	0	0	0	0	0	0	0	0	0	1
0	0	0	0	0	0	0	0	0	0	1
0	0	0	0	0	0	0	0	0	0	1
0	0	0	0	0	0	0	0	0	0	1
0	0	0	0	0	0	0	0	0	0	1
0	0	0	0	0	0	0	0	0	0	1
0	0	0	0	0	0	0	0	0	0	1
0	0	0	0	0	0	0	0	0	0	1
0	0	0	0	0	0	0	0	0	0	1
0	0	0	0	0	0	0	0	0	0	1
0	0	0	0	0	0	0	0	0	0	1
0	0	0	0	0	0	0	0	0	0	1
0	0	0	0	0	0	0	0	0	0	1
0	0	0	0	0	0	0	0	0	0	1
0	0	0	0	0	0	0	0	0	0	1
0	0	0	0	0	0	0	0	0	0	1
0	0	0	0	0	0	0	0	0	0	1
0	0	0	0	0	0	0	0	0	0	1
0	0	0	0	0	0	0	0	0	0	1
0	0	0	0	0	0	0	0	0	0	1
0	0	0	0	0	0	0	0	0	0	1
0	0	0	0	0	0	0	0	0	0	1
0	0	0	0	0	0	0	0	0	0	1
0	0	0	0	0	0	0	0	0	0	1
0	0	0	0	0	0	0	0	0	0	1
0	0	0	0	0	0	0	0	0	0	1
0	0	0	0	0	0	0	0	0	0	1
0	0	0	0	0	0	0	0	0	0	1
0	0	0	0	0	0	0	0	0	0	1
0	0	0	0	0	0	0	0	0	0	1
0	0	0	0	0	0	0	0	0	0	1
0	0	0	0	0	0	0	0	0	0	1
0	0	0	0	0	0	0	0	0	0	1
0	0	0	0	0	0	0	0	0	0	1
0	0	0	0	0	0	0	0	0	0	1
0	0	0	0	0	0	0	0	0	0	1
0	0	0	0	0	0	0	0	0	0	1
0	0	0	0	0	0	0	0.179062	0	0	0.820938
0	0	0	0	0	0	0	0.236614	0	0	0.763386
0	0	0	0	0	0	0	0.318429	0	0	0.681571
0	0	0	0	0	0	0	0.398021	0	0	0.601979
0	0.229589	0	0	0	0	0.608264	0	0	0	0.162147
0	0.227371	0	0	0	0	0.559887	0	0	0	0.212742
0	0.252458	0	0	0.133868	0	0.613673	0	0	0	0
0	0.31968	0	0	0	0	0.68032	0	0	0	0
0	0.24859	0	0	0	0	0.75141	0	0	0	0
0	0.279076	0	0	0	0	0.720924	0	0	0	0
0	0	0.285758	0	0	0	0.714242	0	0	0	0
0	0	0.260336	0	0	0	0.739664	0	0	0	0
0	0	0	0	0	0	0.764408	0	0	0	0.235592
0	0	0	0	0	0	0.787358	0	0	0	0.212642
0	0	0	0	0	0	0.784677	0	0	0	0.215323
0	0	0	0	0	0	0.783362	0	0	0	0.216638
0	0	0	0	0	0	0.782565	0	0	0	0.217435
0	0	0	0	0	0	0.806367	0	0	0	0.193633
0	0	0	0	0	0	0.801178	0	0	0	0.198822
0	0	0	0	0	0	0.728882	0	0	0	0.271118
0	0	0	0	0	0	0.676529	0	0	0	0.323471
0	0	0	0	0	0	0.685472	0	0	0	0.314528
0	0	0	0	0	0	1	0	0	0	0
0	0	0	0	0	0	1	0	0	0	0
0	0	0	0	0.217557	0	0.782443	0	0	0	0
0	0	0	0	0.229617	0	0.770383	0	0	0	0
0	0	0	0	0.176839	0	0.823161	0	0	0	0
0	0	0	0	0.161281	0	0.838719	0	0	0	0
0	0	0	0	0.151506	0	0.848494	0	0	0	0
0	1	0	0	0	0	0	0	0	0	0
0	1	0	0	0	0	0	0	0	0	0
0	1	0	0	0	0	0	0	0	0	0
0	1	0	0	0	0	0	0	0	0	0
0	1	0	0	0	0	0	0	0	0	0
0	1	0	0	0	0	0	0	0	0	0
0	1	0	0	0	0	0	0	0	0	0
0	1	0	0	0	0	0	0	0	0	0
0	1	0	0	0	0	0	0	0	0	0
0	1	0	0	0	0	0	0	0	0	0
0	1	0	0	0	0	0	0	0	0	0
0	1	0	0	0	0	0	0	0	0	0
0	1	0	0	0	0	0	0	0	0	0
0	1	0	0	0	0	0	0	0	0	0
0	1	0	0	0	0	0	0	0	0	0
0	1	0	0	0	0	0	0	0	0	0
0	1	0	0	0	0	0	0	0	0	0
0	1	0	0	0	0	0	0	0	0	0
0	1	0	0	0	0	0	0	0	0	0
0	1	0	0	0	0	0	0	0	0	0
0	1	0	0	0	0	0	0	0	0	0
0	1	0	0	0	0	0	0	0	0	0
0	1	0	0	0	0	0	0	0	0	0
0	1	0	0	0	0	0	0	0	0	0
0	1	0	0	0	0	0	0	0	0	0
0	1	0	0	0	0	0	0	0	0	0
0	1	0	0	0	0	0	0	0	0	0
0	1	0	0	0	0	0	0	0	0	0
0	1	0	0	0	0	0	0	0	0	0
0	1	0	0	0	0	0	0	0	0	0
0	1	0	0	0	0	0	0	0	0	0
0	1	0	0	0	0	0	0	0	0	0
0	1	0	0	0	0	0	0	0	0	0
0	1	0	0	0	0	0	0	0	0	0
0	1	0	0	0	0	0	0	0	0	0
0	1	0	0	0	0	0	0	0	0	0
0	1	0	0	0	0	0	0	0	0	0
0	1	0	0	0	0	0	0	0	0	0
0	1	0	0	0	0	0	0	0	0	0
0	1	0	0	0	0	0	0	0	0	0
0	1	0	0	0	0	0	0	0	0	0
0	1	0	0	0	0	0	0	0	0	0
0	1	0	0	0	0	0	0	0	0	0
0	1	0	0	0	0	0	0	0	0	0
0	1	0	0	0	0	0	0	0	0	0
0	1	0	0	0	0	0	0	0	0	0
0	1	0	0	0	0	0	0	0	0	0
0	1	0	0	0	0	0	0	0	0	0
0	1	0	0	0	0	0	0	0	0	0
0	1	0	0	0	0	0	0	0	0	0
0	1	0	0	0	0	0	0	0	0	0
0	1	0	0	0	0	0	0	0	0	0
0	1	0	0	0	0	0	0	0	0	0
0	1	0	0	0	0	0	0	0	0	0
0	1	0	0	0	0	0	0	0	0	0
0	1	0	0	0	0	0	0	0	0	0
0	1	0	0	0	0	0	0	0	0	0
0	1	0	0	0	0	0	0	0	0	0
0	1	0	0	0	0	0	0	0	0	0
0	1	0	0	0	0	0	0	0	0	0
0	1	0	0	0	0	0	0	0	0	0
0	1	0	0	0	0	0	0	0	0	0
0	1	0	0	0	0	0	0	0	0	0
0	1	0	0	0	0	0	0	0	0	0
0	1	0	0	0	0	0	0	0	0	0
0	1	0	0	0	0	0	0	0	0	0
0	1	0	0	0	0	0	0	0	0	0
0	1	0	0	0	0	0	0	0	0	0
0	1	0	0	0	0	0	0	0	0	0
0	1	0	0	0	0	0	0	0	0	0
0	1	0	0	0	0	0	0	0	0	0
0	1	0	0	0	0	0	0	0	0	0
0	1	0	0	0	0	0	0	0	0	0
0	1	0	0	0	0	0	0	0	0	0
0	0.856865	0	0	0.143135	0	0	0	0	0	0
0	0.846341	0	0	0.153659	0	0	0	0	0	0
0	0.810652	0	0	0.189348	0	0	0	0	0	0
0	0.828265	0	0	0.171735	0	0	0	0	0	0
0	0.821513	0	0	0.178487	0	0	0	0	0	0
0	0.732211	0	0	0.267788	0	0	0	0	0	0
0	0.747367	0	0	0.252633	0	0	0	0	0	0
0	0.769915	0	0	0.230085	0	0	0	0	0	0
0	0.768948	0	0	0.231052	0	0	0	0	0	0
0	0.797417	0	0	0.202583	0	0	0	0	0	0
0	0.78548	0	0	0.21452	0	0	0	0	0	0
0	0.788582	0	0	0.211418	0	0	0	0	0	0
0	0.791533	0	0	0.208467	0	0	0	0	0	0
0	0.45474	0	0.262765	0	0	0.282496	0	0	0	0
0	0.508457	0	0	0.157807	0	0.333736	0	0	0	0
0	0.550822	0	0	0.196493	0	0.252685	0	0	0	0
0	0.578175	0	0	0.163306	0	0.258519	0	0	0	0
0	0.599034	0	0	0.131731	0	0.269235	0	0	0	0
0	0.591073	0	0	0.146141	0	0.262786	0	0	0	0
0	0.619989	0	0	0.158398	0	0.221613	0	0	0	0
0	0.613953	0	0	0.158382	0	0.227665	0	0	0	0
0	0.638999	0	0	0.13122	0	0.229781	0	0	0	0
0	0.645022	0	0	0.13517	0	0.219807	0	0	0	0
0	0.640248	0	0	0	0	0.359752	0	0	0	0
0	0.766675	0	0	0	0	0.233325	0	0	0	0
0	0.746772	0	0	0	0	0.253228	0	0	0	0
0	0.750383	0	0	0	0	0.249617	0	0	0	0
0	0.748748	0	0	0	0	0.251252	0	0	0	0
0	0.753134	0	0	0	0	0.246866	0	0	0	0
0	0.75255	0	0	0	0	0.24745	0	0	0	0
0	0.75611	0	0	0	0	0.24389	0	0	0	0
0	0.75717	0	0	0	0	0.24283	0	0	0	0
0	0.757355	0	0	0	0	0.242645	0	0	0	0
0	0.70114	0	0	0	0	0.29886	0	0	0	0
0	0.724653	0	0	0	0	0.275347	0	0	0	0
0	0.365034	0	0	0	0	0.239652	0	0	0	0.395314
0	0.366283	0	0	0.116189	0	0.223343	0	0	0	0.294185
0	0.399086	0	0	0	0	0.387918	0	0	0	0.212996
0	0.391273	0	0	0	0	0.445735	0	0	0	0.162992
0	0.514269	0	0	0.103189	0	0.24805	0	0	0	0.134492
0	0.471976	0	0	0.108081	0	0.253729	0	0	0	0.166214
0	0.429156	0	0	0.128165	0	0.254159	0	0	0	0.18852
0	0.445769	0	0	0	0	0.236803	0	0	0	0.317428
0	0.458726	0	0	0	0	0.242316	0	0	0	0.298958
0	0.492518	0	0	0	0	0.247206	0	0	0	0.260276
0	0.518846	0	0	0	0	0.220937	0	0	0	0.260216
0	0.512396	0	0	0	0	0.235955	0	0	0	0.251649
0	0.457454	0	0	0	0	0.285225	0	0	0	0.257321
0	0.503979	0	0	0	0	0.280349	0	0	0	0.215672
0	0.520368	0	0	0	0	0.324063	0	0	0	0.155569
0	0.553769	0	0	0	0	0.233536	0	0	0	0.212695
0	0.56882	0	0	0	0	0.217582	0	0	0	0.213598
0	0.642804	0	0	0	0	0.208802	0	0	0	0.148394
0	0.567647	0	0	0	0	0.266702	0	0	0	0.165651
0	0.593168	0	0	0	0	0.230025	0	0	0	0.176808
0	0.609127	0	0	0	0	0.237278	0	0	0	0.153595
0	0.600262	0	0	0	0	0.243409	0	0	0	0.156329
0	0.735772	0	0	0	0	0	0	0	0	0.264228
0	0.740133	0	0	0	0	0	0	0	0	0.259867
0	0.751314	0	0	0	0	0	0	0	0	0.248686
0	0.743644	0	0	0	0	0	0	0	0	0.256356
0	0.745916	0	0	0	0	0	0	0	0	0.254084
0	0.726423	0	0	0	0	0	0	0	0	0.273577
0	0.722329	0	0	0	0	0	0	0	0	0.277671
0	0.711408	0	0	0	0	0	0	0	0	0.288592
0	0.717279	0	0	0	0	0	0	0	0	0.282721
0	0.717041	0	0	0	0	0	0	0	0	0.282959
0	0.779478	0	0	0	0	0	0	0	0	0.220522
0	0.776919	0	0	0	0	0	0	0	0	0.223081
0	0.777866	0	0	0	0	0	0	0	0	0.222134
0	0.771694	0	0	0	0	0	0	0	0	0.228306
0	0.771827	0	0	0	0	0	0	0	0	0.228173
0	0.773724	0	0	0	0	0	0	0	0	0.226276
0	0.774734	0	0	0	0	0	0	0	0	0.225266
0	0.774897	0	0	0	0	0	0	0	0	0.225103
0	0.759059	0	0	0	0	0	0	0	0	0.240941
0	0.763844	0	0	0	0	0	0	0	0	0.236156
0	0.76665	0	0	0	0	0	0	0	0	0.23335
0	0.766447	0	0	0	0	0	0	0	0	0.233553
0	0.837778	0	0	0	0	0	0	0	0	0.162222
0	0.81405	0	0	0	0	0	0	0	0	0.18595
0	0.817922	0	0	0	0	0	0	0	0	0.182078
0	0.791124	0	0	0	0	0	0	0	0	0.208876
0	0.798858	0	0	0	0	0	0	0	0	0.201142
0	0.800674	0	0	0	0	0	0	0	0	0.199326
0	0.805037	0	0	0	0	0	0	0	0	0.194963
0	0.808313	0	0	0	0	0	0	0	0	0.191687
0	0.678914	0	0	0	0	0	0	0	0	0.321086
0	0.674994	0	0	0	0	0	0	0	0	0.325006
0	0.68751	0	0	0	0	0	0	0	0	0.31249
0	0.683216	0	0	0	0	0	0	0	0	0.316784
0	0.683676	0	0	0	0	0	0	0	0	0.316324
0	0.631482	0	0	0	0	0	0	0	0	0.368518
0	0.623452	0	0	0	0	0	0	0	0	0.376548
0	0.652876	0	0	0	0	0	0	0	0	0.347124
0	0.646982	0	0	0	0	0	0	0	0	0.353018
0	0.644308	0	0	0	0	0	0	0	0	0.355692
0	0.642614	0	0	0	0	0	0	0	0	0.357386
0	0.509692	0	0	0	0	0	0	0	0	0.490309
0	0.510132	0	0	0	0	0	0	0	0	0.489868
0	0.554357	0	0	0	0	0	0	0	0	0.445643
0	0.58191	0	0	0	0	0	0	0	0	0.41809
0	0.583383	0	0	0	0	0	0	0	0	0.416617
0	0.567971	0	0	0	0	0	0	0	0	0.432029
0	0.573639	0	0	0	0	0	0	0	0	0.426361
0.147221	0.422139	0	0	0.127024	0	0	0	0	0	0.303616
0.175472	0.537639	0	0	0	0	0	0	0	0	0.286889
0.210134	0.460312	0	0	0	0	0	0	0	0	0.329553
0.198969	0.430399	0	0	0	0	0	0	0	0	0.370631
0.158131	0.44276	0	0	0	0	0	0	0	0	0.399108
0.314587	0.292817	0	0	0	0	0	0	0	0	0.392595
0.32092	0.414104	0	0	0	0	0	0	0	0	0.264976
0	0.319728	0	0	0.424255	0	0	0	0	0	0.256017
0	0.626811	0	0	0.148919	0	0	0	0	0	0.22427
0	0.434267	0	0	0.155232	0	0	0	0	0	0.410501
0	0.525267	0	0	0.186536	0	0	0	0	0	0.288197
0	0.524212	0	0	0.191584	0	0	0	0	0	0.284204
0	0.468623	0	0	0.236141	0	0	0	0	0	0.295236
0	0.427829	0	0	0.240595	0	0	0	0	0	0.331576
0	0.253892	0.746108	0	0	0	0	0	0	0	0
0	0.317551	0.682449	0	0	0	0	0	0	0	0
0	0.401898	0.598102	0	0	0	0	0	0	0	0
0	0.407195	0.592805	0	0	0	0	0	0	0	0
0	0.372968	0.627032	0	0	0	0	0	0	0	0
0	0.360944	0.639056	0	0	0	0	0	0	0	0
0	0.350294	0.649706	0	0	0	0	0	0	0	0
0	0.311664	0.546442	0	0.141894	0	0	0	0	0	0
0	0.267954	0.598216	0	0.13383	0	0	0	0	0	0
0	0.259156	0.505986	0	0.234858	0	0	0	0	0	0
0	0.262453	0.494906	0	0.242641	0	0	0	0	0	0
0	0.317114	0.438701	0	0.244186	0	0	0	0	0	0
0	0.332797	0.392512	0	0.274692	0	0	0	0	0	0
0	0.345291	0.341275	0	0.313434	0	0	0	0	0	0
0	0.394837	0.29841	0	0.306753	0	0	0	0	0	0
0	0.568774	0.259869	0	0.171357	0	0	0	0	0	0
0	0.501659	0.303964	0	0.194378	0	0	0	0	0	0
0	0.28516	0.345944	0	0	0	0	0.368896	0	0	0
0	0.274121	0.371953	0	0	0	0	0.353926	0	0	0
0	0.2133	0.309536	0	0	0	0	0.477164	0	0	0
0	0.239086	0.337695	0	0	0	0	0.423219	0	0	0
0	0.305552	0.254558	0	0	0	0	0.210937	0	0	0.228953
0	0.264942	0.340485	0	0	0	0	0.219635	0	0	0.174938
0	0.339052	0.424909	0	0	0	0	0.236039	0	0	0
0	0.382559	0.434085	0	0	0	0	0.183356	0	0	0
0	0.366096	0.451107	0	0	0	0	0.182797	0	0	0
0	0.586811	0.270854	0	0	0	0	0.142335	0	0	0
0	0.482833	0.345559	0	0	0	0	0.171608	0	0	0
0	0.450513	0.368379	0	0	0	0	0.181108	0	0	0
0	0.434708	0.26897	0	0	0	0	0.296321	0	0	0
0	0.479488	0.278208	0	0	0	0	0.242304	0	0	0
0	0.283449	0.453343	0	0	0	0.263208	0	0	0	0
0	0.388076	0.192907	0	0	0	0.263191	0	0	0	0.155826
0	0.456961	0.187036	0	0	0	0.195928	0	0	0	0.160075
0	0.512622	0.259547	0	0	0	0.227831	0	0	0	0
0	0.427491	0.317596	0	0	0	0.254914	0	0	0	0
0	0.304471	0.316869	0	0.179251	0	0.199409	0	0	0	0
0	0.426311	0.281295	0	0.103128	0	0.189266	0	0	0	0
0	0.399423	0.231525	0	0.1572	0	0.211852	0	0	0	0
0	0.440198	0.195712	0	0.144258	0	0.219832	0	0	0	0
0	0.761451	0.238549	0	0	0	0	0	0	0	0
0	0.764394	0.235606	0	0	0	0	0	0	0	0
0	0.764179	0.235821	0	0	0	0	0	0	0	0
0	0.744363	0.255637	0	0	0	0	0	0	0	0
0	0.745217	0.254783	0	0	0	0	0	0	0	0
0	0.735533	0.264467	0	0	0	0	0	0	0	0
0	0.73907	0.26093	0	0	0	0	0	0	0	0
0	0.740959	0.259041	0	0	0	0	0	0	0	0
0	0.740349	0.259651	0	0	0	0	0	0	0	0
0	0.718382	0.281618	0	0	0	0	0	0	0	0
0	0.716943	0.283057	0	0	0	0	0	0	0	0
0	0.709954	0.290046	0	0	0	0	0	0	0	0
0	0.713546	0.286454	0	0	0	0	0	0	0	0
0	0.723685	0.276315	0	0	0	0	0	0	0	0
0	0.730453	0.269547	0	0	0	0	0	0	0	0
0	0.650618	0.349382	0	0	0	0	0	0	0	0
0	0.647966	0.352034	0	0	0	0	0	0	0	0
0	0.660849	0.339151	0	0	0	0	0	0	0	0
0	0.655129	0.344871	0	0	0	0	0	0	0	0
0	0.689485	0.310515	0	0	0	0	0	0	0	0
0	0.688149	0.311851	0	0	0	0	0	0	0	0
0	0.694449	0.305551	0	0	0	0	0	0	0	0
0	0.691662	0.308338	0	0	0	0	0	0	0	0
0	0.692083	0.307917	0	0	0	0	0	0	0	0
0	0.677208	0.322792	0	0	0	0	0	0	0	0
0	0.683059	0.316941	0	0	0	0	0	0	0	0
0	0.682228	0.317772	0	0	0	0	0	0	0	0
0	0.462598	0.537402	0	0	0	0	0	0	0	0
0	0.490701	0.509299	0	0	0	0	0	0	0	0
0	0.49649	0.50351	0	0	0	0	0	0	0	0
0	0.542525	0.457475	0	0	0	0	0	0	0	0
0	0.530628	0.469372	0	0	0	0	0	0	0	0
0	0.532177	0.467823	0	0	0	0	0	0	0	0
0	0.6102	0.3898	0	0	0	0	0	0	0	0
0	0.607797	0.392203	0	0	0	0	0	0	0	0
0	0.564877	0.435123	0	0	0	0	0	0	0	0
0	0.558666	0.441334	0	0	0	0	0	0	0	0
0	0.57574	0.42426	0	0	0	0	0	0	0	0
0	0.584602	0.415398	0	0	0	0	0	0	0	0
0	0.591297	0.408703	0	0	0	0	0	0	0	0
0	0.296854	0.347724	0	0	0	0	0	0	0	0.355422
0	0.31408	0.354642	0	0	0	0	0	0	0	0.331279
0	0.323977	0.350934	0	0	0	0	0	0	0	0.325089
0	0.482402	0.267982	0	0	0	0	0	0	0	0.249616
0	0.415937	0.28645	0	0	0	0	0	0	0	0.297612
0	0.429907	0.257317	0	0	0	0	0	0	0	0.312777
0	0.419214	0.357728	0	0	0	0	0	0	0	0.223058
0	0.371177	0.4389	0	0	0	0	0	0	0	0.189923
0	0.629162	0.219705	0	0	0	0	0	0	0	0.151133
0	0.538381	0.281725	0	0	0	0	0	0	0	0.179894
0	0.596866	0.230139	0	0	0	0	0	0	0	0.172994
0	0.591039	0.232927	0	0	0	0	0	0	0	0.176034
0	0.555838	0.236953	0	0	0	0	0	0	0	0.207209
0	0.566892	0.247034	0	0	0	0	0	0	0	0.186074
0	0.559775	0.251638	0	0	0	0	0	0	0	0.188587
0	0.456285	0.261118	0	0.121466	0	0	0	0	0	0.161131
0	0.375625	0.224785	0	0.189349	0	0	0	0	0	0.210241
0	0.569956	0	0	0	0	0	0.430044	0	0	0
0	0.509535	0	0	0	0	0	0.302727	0	0	0.187739
0	0.252425	0	0.292657	0	0	0	0.454918	0	0	0
0	0.29614	0	0.364901	0	0	0	0.33896	0	0	0
0	0.356776	0	0.279183	0	0	0	0.364042	0	0	0
0	0.505574	0	0.330768	0	0	0	0.163658	0	0	0
0	0.485947	0	0.255052	0	0	0	0.259001	0	0	0
0	0.525122	0	0.19679	0	0	0	0.278088	0	0	0
0	0.330348	0.201226	0.468426	0	0	0	0	0	0	0
0	0.255842	0.290621	0.453537	0	0	0	0	0	0	0
0	0.37068	0.280965	0.348355	0	0	0	0	0	0	0
0	0.346276	0.264797	0.388927	0	0	0	0	0	0	0
0	0.317936	0.277307	0.404758	0	0	0	0	0	0	0
0	0.22493	0.21577	0.465074	0	0	0	0.0942266	0	0	0
0	0.229808	0.232513	0.537679	0	0	0	0	0	0	0
0	0.237558	0.192251	0.570191	0	0	0	0	0	0	0
0	0.221356	0.204624	0.57402	0	0	0	0	0	0	0
0	0.610403	0.197684	0.191914	0	0	0	0	0	0	0
0	0.595243	0.209972	0.194786	0	0	0	0	0	0	0
0	0.586273	0.215434	0.198292	0	0	0	0	0	0	0
0	0.585523	0.211523	0.202954	0	0	0	0	0	0	0
0	0.573905	0.211029	0.215066	0	0	0	0	0	0	0
0	0.572642	0.225665	0.201693	0	0	0	0	0	0	0
0	0.549848	0.235155	0.214997	0	0	0	0	0	0	0
0	0.549495	0.250011	0.200494	0	0	0	0	0	0	0
0	0.549133	0.220031	0.230837	0	0	0	0	0	0	0
0	0.567496	0.199435	0.233069	0	0	0	0	0	0	0
0	0.5602	0.210913	0.228887	0	0	0	0	0	0	0
0	0.46073	0.233668	0.305602	0	0	0	0	0	0	0
0	0.444425	0.244361	0.311213	0	0	0	0	0	0	0
0	0.44331	0.262228	0.294462	0	0	0	0	0	0	0
0	0.427897	0.262013	0.310091	0	0	0	0	0	0	0
0	0.4532	0.209862	0.336938	0	0	0	0	0	0	0
0	0.422899	0.22001	0.357091	0	0	0	0	0	0	0
0	0.426919	0.223632	0.349449	0	0	0	0	0	0	0
0	0.481612	0.256691	0.261697	0	0	0	0	0	0	0
0	0.469453	0.276281	0.254266	0	0	0	0	0	0	0
0	0.452312	0.279357	0.268332	0	0	0	0	0	0	0
0	0.502004	0.258612	0.239383	0	0	0	0	0	0	0
0	0.510653	0.240781	0.248567	0	0	0	0	0	0	0
0	0.515585	0.241216	0.243199	0	0	0	0	0	0	0
0	0.516922	0.242426	0.240652	0	0	0	0	0	0	0
0	0.510973	0.274135	0.214892	0	0	0	0	0	0	0
0	0.492042	0.277993	0.229965	0	0	0	0	0	0	0
0	0.488223	0.279427	0.23235	0	0	0	0	0	0	0
0	0.467524	0.335973	0.196503	0	0	0	0	0	0	0
0	0.480663	0.315317	0.20402	0	0	0	0	0	0	0
0	0.385478	0.356213	0.258309	0	0	0	0	0	0	0
0	0.422258	0.334668	0.243075	0	0	0	0	0	0	0
0	0.416264	0.314634	0.269102	0	0	0	0	0	0	0
0	0.424993	0.305865	0.269143	0	0	0	0	0	0	0
0	0.440107	0.302473	0.25742	0	0	0	0	0	0	0
0	0.458917	0.297124	0.243959	0	0	0	0	0	0	0
0	0.269283	0.215446	0.194845	0	0	0.182406	0	0	0	0.138021
0.111295	0.220225	0.26096	0.252346	0	0	0	0	0	0	0.155174
0	0.29818	0.307216	0.254557	0	0	0	0	0	0	0.140047
0	0.261045	0.321027	0.211452	0	0	0	0	0	0	0.206476
0	0.309882	0.319334	0.192123	0	0	0	0	0	0	0.178661
0	0.29223	0.20494	0.251197	0	0	0	0	0	0	0.251634
0	0.330043	0.218277	0.192487	0	0	0	0	0	0	0.259193
0	0.305529	0.268262	0.181047	0	0	0	0	0	0	0.245162
0	0.412286	0.215877	0.222876	0	0	0	0	0	0	0.148961
0	0.426032	0.225186	0.200792	0	0	0	0	0	0	0.147991
0	0.434124	0.219232	0.18304	0	0	0	0	0	0	0.163604
0	0.453751	0.202987	0.16843	0	0	0	0	0	0	0.174832
0	0.467799	0.190222	0.17318	0	0	0	0	0	0	0.1688
0	0.480601	0.185729	0.19748	0	0	0	0	0	0	0.136189
0	0.459867	0.21566	0.187366	0	0	0	0	0	0	0.137107
0	0.374668	0.268834	0.210482	0	0	0	0	0	0	0.146016
0	0.382123	0.231753	0.184133	0	0	0	0	0	0	0.201991
0	0.375613	0.18953	0.213807	0	0	0	0	0	0	0.22105
0	0.282207	0.209726	0.358766	0	0	0	0	0	0	0.149301
0	0.348347	0.238029	0.265784	0	0	0	0	0	0	0.147841
0	0.337576	0.207643	0.314556	0	0	0	0	0	0	0.140224
0	0.368378	0.182541	0.301312	0	0	0	0	0	0	0.147769
0	0.384964	0.192604	0.277864	0	0	0	0	0	0	0.144567
0	0.350231	0.42252	0.227249	0	0	0	0	0	0	0
0	0.352164	0.432391	0.215446	0	0	0	0	0	0	0
0	0.365828	0.404187	0.229985	0	0	0	0	0	0	0
0	0.368337	0.416396	0.215267	0	0	0	0	0	0	0
0	0.227028	0.424292	0.348679	0	0	0	0	0	0	0
0	0.21217	0.43141	0.35642	0	0	0	0	0	0	0
0	0.294293	0.430935	0.274772	0	0	0	0	0	0	0
0	0.267026	0.434763	0.298211	0	0	0	0	0	0	0
0	0.27712	0.471437	0.251443	0	0	0	0	0	0	0
0	0.251206	0.472437	0.276356	0	0	0	0	0	0	0
0	0.237172	0.457642	0.305186	0	0	0	0	0	0	0
0	0.204762	0.204282	0.174324	0	0	0	0.210667	0	0	0.205965
0	0.301768	0.200067	0.222422	0	0	0	0.136438	0	0	0.139304
0	0.219085	0.316026	0.191572	0	0	0	0.141234	0	0	0.132084
0	0.234682	0.250808	0.204066	0	0	0	0.310444	0	0	0
0	0.182311	0.362886	0.166392	0	0	0	0.288411	0	0	0
0	0.223588	0.323058	0.216824	0	0	0	0.23653	0	0	0
0	0.191105	0.302267	0.240683	0	0	0	0.265945	0	0	0
0	0.289793	0.323174	0.182277	0	0	0	0.204756	0	0	0
0	0.213554	0.382013	0.228661	0	0	0	0.175772	0	0	0
0	0.377057	0.27097	0.185563	0	0	0	0.16641	0	0	0
0	0.350502	0.253828	0.244317	0	0	0	0.151353	0	0	0
0	0.381115	0.201606	0.254135	0	0	0	0.163144	0	0	0
0	0.207902	0.296305	0.385368	0	0	0	0.110425	0	0	0
0	0.280424	0.246894	0.317349	0	0	0	0.155333	0	0	0
0	0.262896	0.290462	0.314755	0	0	0	0.131887	0	0	0
0	0.474265	0	0.525735	0	0	0	0	0	0	0
0	0.51624	0	0.48376	0	0	0	0	0	0	0
0	0.504979	0	0.495021	0	0	0	0	0	0	0
0	0.495977	0	0.504023	0	0	0	0	0	0	0
0	0.774941	0	0.225059	0	0	0	0	0	0	0
0	0.775191	0	0.224809	0	0	0	0	0	0	0
0	0.779661	0	0.220339	0	0	0	0	0	0	0
0	0.778189	0	0.221811	0	0	0	0	0	0	0
0	0.76447	0	0.23553	0	0	0	0	0	0	0
0	0.765616	0	0.234384	0	0	0	0	0	0	0
0	0.769396	0	0.230604	0	0	0	0	0	0	0
0	0.77061	0	0.22939	0	0	0	0	0	0	0
0	0.754196	0	0.245804	0	0	0	0	0	0	0
0	0.74912	0	0.25088	0	0	0	0	0	0	0
0	0.748746	0	0.251255	0	0	0	0	0	0	0
0	0.727771	0	0.272229	0	0	0	0	0	0	0
0	0.723578	0	0.276422	0	0	0	0	0	0	0
0	0.725288	0	0.274712	0	0	0	0	0	0	0
0	0.725399	0	0.274601	0	0	0	0	0	0	0
0	0.731171	0	0.268829	0	0	0	0	0	0	0
0	0.732374	0	0.267626	0	0	0	0	0	0	0
0	0.736403	0	0.263597	0	0	0	0	0	0	0
0	0.738348	0	0.261652	0	0	0	0	0	0	0
0	0.606467	0	0.393533	0	0	0	0	0	0	0
0	0.577108	0	0.422892	0	0	0	0	0	0	0
0	0.584879	0	0.415121	0	0	0	0	0	0	0
0	0.592137	0	0.407863	0	0	0	0	0	0	0
0	0.631825	0	0.368175	0	0	0	0	0	0	0
0	0.644707	0	0.355293	0	0	0	0	0	0	0
0	0.640427	0	0.359573	0	0	0	0	0	0	0
0	0.700043	0	0.299957	0	0	0	0	0	0	0
0	0.688442	0	0.311558	0	0	0	0	0	0	0
0	0.689058	0	0.310942	0	0	0	0	0	0	0
0	0.660112	0	0.339888	0	0	0	0	0	0	0
0	0.676233	0	0.323767	0	0	0	0	0	0	0
0	0.342051	0	0.223318	0	0	0	0.232383	0	0	0.202248
0	0.368367	0	0.236615	0	0	0	0.142186	0	0	0.252832
0	0.628902	0	0.192353	0	0	0	0	0	0	0.178745
0	0.64605	0	0.195998	0	0	0	0	0	0	0.157952
0	0.586766	0	0.222791	0	0	0	0	0	0	0.190443
0	0.567076	0	0.23615	0	0	0	0	0	0	0.196774
0	0.58203	0	0.233848	0	0	0	0	0	0	0.184122
0	0.573713	0	0.239386	0	0	0	0	0	0	0.186901
0	0.575186	0	0.245045	0	0	0	0	0	0	0.179768
0	0.580398	0	0.240963	0	0	0	0	0	0	0.178639
0	0.590363	0	0.206547	0	0	0	0	0	0	0.20309
0	0.59161	0	0.200549	0	0	0	0	0	0	0.207841
0	0.603468	0	0.217648	0	0	0	0	0	0	0.178884
0	0.614676	0	0.205307	0	0	0	0	0	0	0.180017
0	0.534213	0	0.289417	0	0	0	0	0	0	0.17637
0	0.532415	0	0.302091	0	0	0	0	0	0	0.165494
0	0.491272	0	0.30804	0	0	0	0	0	0	0.200689
0	0.492136	0	0.32823	0	0	0	0	0	0	0.179634
0	0.507517	0	0.332568	0	0	0	0	0	0	0.159914
0	0.515487	0	0.269372	0	0	0	0	0	0	0.215142
0	0.515459	0	0.251216	0	0	0	0	0	0	0.233325
0	0.542794	0	0.233483	0	0	0	0	0	0	0.223723
0	0.536857	0	0.253802	0	0	0	0	0	0	0.20934
0	0.539801	0	0.251029	0	0	0	0	0	0	0.20917
0	0.547682	0	0.266629	0	0	0	0	0	0	0.18569
0	0.542514	0	0.2614	0	0	0	0	0	0	0.196086
0	0.54494	0	0.260493	0	0	0	0	0	0	0.194567
0	0.475578	0	0.266358	0	0	0	0	0	0	0.258064
0	0.51219	0	0.233454	0	0	0	0	0	0	0.254355
0	0.523225	0	0.232594	0	0	0	0	0	0	0.24418
0	0.519886	0	0.226011	0	0	0	0	0	0	0.254103
0	0.524861	0	0.226028	0	0	0	0	0	0	0.249111
0	0.490999	0	0.240999	0	0	0	0	0	0	0.268002
0	0.503599	0	0.220509	0	0	0	0	0	0	0.275892
0	0.439211	0	0.220965	0	0	0	0	0	0	0.339824
0	0.421495	0	0.223636	0	0	0	0	0	0	0.354869
0	0.472596	0	0.234569	0	0	0	0	0	0	0.292835
0	0.44717	0	0.238048	0	0	0	0	0	0	0.314783
0	0.448774	0	0.237941	0	0	0	0	0	0	0.313285
0	0.388884	0	0.215129	0	0	0	0	0	0	0.395988
0	0.372259	0	0.240049	0	0	0	0	0	0	0.387692
0	0.37283	0	0.22999	0	0	0	0	0	0	0.39718
0	0.391983	0	0.257955	0	0	0	0	0	0	0.350062
0	0.360088	0	0.27406	0	0	0	0	0	0	0.365852
0	0.342841	0	0.329796	0	0	0	0	0	0	0.327363
0	0.375534	0	0.362196	0	0	0	0	0	0	0.26227
0	0.380428	0	0.328073	0	0	0	0	0	0	0.291499
0	0.391277	0	0.314453	0	0	0	0	0	0	0.29427
0	0.44559	0	0.313685	0	0	0	0	0	0	0.240725
0	0.45044	0	0.321962	0	0	0	0	0	0	0.227598
0	0.47125	0	0.318108	0	0	0	0	0	0	0.210642
0	0.464809	0	0.309352	0	0	0	0	0	0	0.225839
0	0.428786	0	0.390963	0	0	0	0	0	0	0.180251
0	0.426945	0	0.350953	0	0	0	0	0	0	0.222102
0	0.421112	0	0.366448	0	0	0	0	0	0	0.21244
0	0.414513	0	0.367224	0	0	0	0	0	0	0.218263
0.192496	0.288683	0	0.245502	0	0	0	0	0	0	0.27332
0	0.243641	0	0.245051	0	0	0	0	0	0	0.511308
0	0.26989	0	0.266214	0	0	0	0	0	0	0.463896
0.140386	0	0	0.662149	0	0	0	0.197465	0	0	0
0.115335	0	0	0.584901	0	0	0	0.299764	0	0	0
0	0	0	0.573524	0	0	0	0.426476	0	0	0
0	0	0	0.565464	0	0	0	0.434536	0	0	0
0	0	0	0.565282	0	0	0	0.434718	0	0	0
0	0	0	0.559016	0	0	0	0.440984	0	0	0
0	0	0	0.561909	0	0	0	0.438091	0	0	0
0	0	0	0.64503	0	0	0	0.35497	0	0	0
0	0	0	0.644787	0	0	0	0.355213	0	0	0
0	0	0	0.649242	0	0	0	0.350758	0	0	0
0	0	0	0.652412	0	0	0	0.347588	0	0	0
0	0	0	0.63674	0	0	0	0.36326	0	0	0
0	0	0	0.639537	0	0	0	0.360463	0	0	0
0	0	0	0.638767	0	0	0	0.361233	0	0	0
0	0	0	0.628147	0	0	0	0.371853	0	0	0
0	0	0	0.630909	0	0	0	0.369091	0	0	0
0	0	0	0.588018	0	0	0	0.411982	0	0	0
0	0	0	0.586343	0	0	0	0.413657	0	0	0
0	0	0	0.586181	0	0	0	0.413819	0	0	0
0	0	0	0.593993	0	0	0	0.406007	0	0	0
0	0	0	0.592554	0	0	0	0.407446	0	0	0
0	0	0	0.600991	0	0	0	0.399009	0	0	0
0	0	0	0.596555	0	0	0	0.403445	0	0	0
0	0	0	0.598536	0	0	0	0.401464	0	0	0
0	0	0	0.609235	0	0	0	0.390765	0	0	0
0	0	0	0.608845	0	0	0	0.391155	0	0	0
0	0	0	0.607169	0	0	0	0.392831	0	0	0
0	0	0	0.608023	0	0	0	0.391977	0	0	0
0	0	0	0.618255	0	0	0	0.381745	0	0	0
0	0	0	0.616524	0	0	0	0.383476	0	0	0
0	0	0	0.620714	0	0	0	0.379286	0	0	0
0	0	0	0.623929	0	0	0	0.376071	0	0	0
0	0	0	0.667777	0	0	0	0.332223	0	0	0
0	0	0	0.671023	0	0	0	0.328977	0	0	0
0	0	0	0.6709	0	0	0	0.3291	0	0	0
0	0	0	0.701945	0	0	0	0.298055	0	0	0
0	0	0	0.701976	0	0	0	0.298024	0	0	0
0	0	0	0.692884	0	0	0	0.307116	0	0	0
0	0	0	0.693496	0	0	0	0.306504	0	0	0
0	0	0	0.761265	0	0	0	0.238735	0	0	0
0	0	0	0.759414	0	0	0	0.240586	0	0	0
0	0	0	0.750894	0	0	0	0.249106	0	0	0
0	0	0	0.753647	0	0	0	0.246353	0	0	0
0	0	0	0.737335	0	0	0	0.262665	0	0	0
0	0	0	0.738934	0	0	0	0.261066	0	0	0
0	0	0	0.733146	0	0	0	0.266854	0	0	0
0	0	0	0.728365	0	0	0	0.271635	0	0	0
0	0	0	0.712125	0	0	0	0.287875	0	0	0
0	0	0	0.721037	0	0	0	0.278963	0	0	0
0.136904	0	0	0.46933	0	0	0	0.16826	0	0	0.225506
0	0	0	0.589187	0	0	0	0.254761	0	0	0.156051
0	0	0	0.357229	0	0	0	0.300719	0	0	0.342052
0	0	0	0.444863	0	0	0	0.270242	0	0	0.284895
0	0	0	0.490243	0	0	0	0.334272	0	0	0.175486
0	0	0	0.448029	0	0	0	0.321098	0	0	0.230873
0	0.252729	0	0.747271	0	0	0	0	0	0	0
0.215955	0	0	0.784045	0	0	0	0	0	0	0
0	0	0	0.827388	0	0	0	0	0	0	0.172612
0	0	0	1	0	0	0	0	0	0	0
0	0	0	1	0	0	0	0	0	0	0
0	0	0	1	0	0	0	0	0	0	0
0	0	0	1	0	0	0	0	0	0	0
0	0	0	1	0	0	0	0	0	0	0
0	0	0	1	0	0	0	0	0	0	0
0	0	0	1	0	0	0	0	0	0	0
0	0	0	1	0	0	0	0	0	0	0
0	0	0	1	0	0	0	0	0	0	0
0	0	0	1	0	0	0	0	0	0	0
0	0	0	1	0	0	0	0	0	0	0
0	0	0	1	0	0	0	0	0	0	0
0	0	0	1	0	0	0	0	0	0	0
0	0	0	0.887695	0	0	0	0.112305	0	0	0
0	0	0	0.867308	0	0	0	0.132692	0	0	0
0	0	0	0.863554	0	0	0	0.136446	0	0	0
0	0	0	0.876355	0	0	0	0.123645	0	0	0
0	0	0	0.870983	0	0	0	0.129018	0	0	0
0	0	0	0.872772	0	0	0	0.127228	0	0	0
0	0	0	0.797394	0	0	0	0.202606	0	0	0
0	0	0	0.793171	0	0	0	0.206829	0	0	0
0	0	0	0.794993	0	0	0	0.205007	0	0	0
0	0	0	0.773436	0	0	0	0.226564	0	0	0
0	0	0	0.779012	0	0	0	0.220988	0	0	0
0	0	0	0.819983	0	0	0	0.180017	0	0	0
0	0	0	0.81633	0	0	0	0.18367	0	0	0
0	0	0	0.814645	0	0	0	0.185355	0	0	0
0	0	0	0.815424	0	0	0	0.184576	0	0	0
0	0	0	0.813391	0	0	0	0.186609	0	0	0
0	0	0	0.81336	0	0	0	0.18664	0	0	0
0	0	0	0.811981	0	0	0	0.188019	0	0	0
0	0	0	0.811094	0	0	0	0.188906	0	0	0
0	0	0	0.851427	0	0	0	0.148573	0	0	0
0	0	0	0.852355	0	0	0	0.147645	0	0	0
0	0	0	0.840895	0	0	0	0.159105	0	0	0
0	0	0	0.831911	0	0	0	0.168089	0	0	0
0	0	0	0.829534	0	0	0	0.170466	0	0	0
0	0	0.330076	0.502081	0	0	0	0.167843	0	0	0
0	0	0.308012	0.545387	0	0	0	0.146601	0	0	0
0	0	0.32427	0.542804	0	0	0	0.132925	0	0	0
0	0	0.357863	0.512038	0	0	0	0.130099	0	0	0
0	0	0.346407	0.53922	0	0	0	0.114373	0	0	0
0	0	0.39989	0.434199	0	0	0	0.16591	0	0	0
0	0	0.37392	0.453361	0	0	0	0.17272	0	0	0
0	0	0.392355	0.493792	0	0	0	0.113853	0	0	0
0	0	0.389769	0.469401	0	0	0	0.14083	0	0	0
0	0	0.207634	0.584855	0	0	0	0.207511	0	0	0
0	0	0.193614	0.592978	0	0	0	0.213408	0	0	0
0	0	0.198198	0.548842	0	0	0	0.25296	0	0	0
0	0	0.176259	0.582542	0	0	0	0.241199	0	0	0
0	0	0.193302	0.565734	0	0	0	0.240964	0	0	0
0	0	0.191382	0.569587	0	0	0	0.239031	0	0	0
0	0	0.245322	0.584357	0	0	0	0.170321	0	0	0
0	0	0.257425	0.557053	0	0	0	0.185521	0	0	0
0	0	0.264805	0.562451	0	0	0	0.172744	0	0	0
0	0	0.229113	0.527396	0	0	0	0.243492	0	0	0
0	0	0.24358	0.53533	0	0	0	0.221091	0	0	0
0	0	0.236547	0.553693	0	0	0	0.20976	0	0	0
0	0	0.18224	0.452917	0	0	0	0.364843	0	0	0
0	0	0.194752	0.470658	0	0	0	0.33459	0	0	0
0	0	0.271927	0.488758	0	0	0	0.239315	0	0	0
0	0	0.218196	0.485502	0	0	0	0.296302	0	0	0
0	0	0.233711	0.479738	0	0	0	0.286551	0	0	0
0	0	0.423798	0.576202	0	0	0	0	0	0	0
0	0	0.340209	0.659791	0	0	0	0	0	0	0
0	0	0.348395	0.651605	0	0	0	0	0	0	0
0	0	0.345535	0.654465	0	0	0	0	0	0	0
0	0	0.398653	0.601347	0	0	0	0	0	0	0
0	0	0.380222	0.619778	0	0	0	0	0	0	0
0	0	0.376439	0.623561	0	0	0	0	0	0	0
0	0	0.374801	0.625199	0	0	0	0	0	0	0
0	0	0.224313	0.619439	0	0	0	0.156248	0	0	0
0	0	0.217383	0.654954	0	0	0	0.127663	0	0	0
0	0	0.21233	0.654686	0	0	0	0.132984	0	0	0
0	0	0.206365	0.64374	0	0	0	0.149895	0	0	0
0	0	0.213962	0.643851	0	0	0	0.142187	0	0	0
0	0	0.182754	0.722153	0	0	0	0.0950927	0	0	0
0	0	0.183942	0.680897	0	0	0	0.135161	0	0	0
0	0	0.197307	0.676671	0	0	0	0.126022	0	0	0
0	0	0.196191	0.684148	0	0	0	0.11966	0	0	0
0	0	0.202429	0.696938	0	0	0	0.100632	0	0	0
0	0	0.22178	0.676944	0	0	0	0.101276	0	0	0
0	0	0.21237	0.78763	0	0	0	0	0	0	0
0	0	0.214191	0.785809	0	0	0	0	0	0	0
0	0	0.21535	0.78465	0	0	0	0	0	0	0
0	0	0.204706	0.795294	0	0	0	0	0	0	0
0	0	0.200398	0.799602	0	0	0	0	0	0	0
0	0	0.196159	0.803841	0	0	0	0	0	0	0
0	0	0.2657	0.7343	0	0	0	0	0	0	0
0	0	0.267746	0.732254	0	0	0	0	0	0	0
0	0	0.255567	0.744433	0	0	0	0	0	0	0
0	0	0.257174	0.742826	0	0	0	0	0	0	0
0	0	0.25819	0.74181	0	0	0	0	0	0	0
0	0	0.245917	0.754083	0	0	0	0	0	0	0
0	0	0.249697	0.750303	0	0	0	0	0	0	0
0	0	0.316688	0.683312	0	0	0	0	0	0	0
0	0	0.299981	0.700019	0	0	0	0	0	0	0
0	0	0.298054	0.701946	0	0	0	0	0	0	0
0	0	0.280238	0.719762	0	0	0	0	0	0	0
0	0	0.285013	0.714987	0	0	0	0	0	0	0
0.314794	0.205933	0.193534	0.28574	0	0	0	0	0	0	0
0.167765	0	0.203649	0.472075	0	0	0	0	0	0	0.156512
0.14678	0	0.24837	0.604849	0	0	0	0	0	0	0
0.219166	0	0.211773	0.56906	0	0	0	0	0	0	0
0.3312	0	0.257606	0.411194	0	0	0	0	0	0	0
0.249408	0	0.342247	0.408345	0	0	0	0	0	0	0
0.251009	0	0.248632	0.500358	0	0	0	0	0	0	0
0.247886	0	0.29639	0.455724	0	0	0	0	0	0	0
0.376891	0	0.246337	0.232226	0	0	0	0.144546	0	0	0
0.374719	0	0.204377	0.188186	0	0	0	0.232719	0	0	0
0.187523	0	0.2131	0.490344	0	0	0	0.109033	0	0	0
0.173951	0	0.245091	0.384963	0	0	0	0.195995	0	0	0
0.186473	0	0.232661	0.429555	0	0	0	0.151311	0	0	0
0.14874	0	0.26265	0.43483	0	0	0	0.15378	0	0	0
0.281773	0	0.273432	0.263114	0	0	0	0.181682	0	0	0
0.255311	0	0.336573	0.282888	0	0	0	0.125228	0	0	0
0.199121	0	0.323105	0.323525	0	0	0	0.154248	0	0	0
0.21784	0	0.309581	0.299545	0	0	0	0.173035	0	0	0
0.14898	0	0.29921	0.273603	0	0	0	0.278208	0	0	0
0.139814	0	0.380986	0.296473	0	0	0	0.182726	0	0	0
0	0	1	0	0	0	0	0	0	0	0
0	0	1	0	0	0	0	0	0	0	0
0	0	1	0	0	0	0	0	0	0	0
0	0	1	0	0	0	0	0	0	0	0
0	0	1	0	0	0	0	0	0	0	0
0	0	1	0	0	0	0	0	0	0	0
0	0	1	0	0	0	0	0	0	0	0
0	0	1	0	0	0	0	0	0	0	0
0	0	1	0	0	0	0	0	0	0	0
0	0	1	0	0	0	0	0	0	0	0
0	0	1	0	0	0	0	0	0	0	0
0	0	1	0	0	0	0	0	0	0	0
0	0	1	0	0	0	0	0	0	0	0
0	0	1	0	0	0	0	0	0	0	0
0	0	1	0	0	0	0	0	0	0	0
0	0	1	0	0	0	0	0	0	0	0
0	0	1	0	0	0	0	0	0	0	0
0	0	1	0	0	0	0	0	0	0	0
0	0	0.352123	0	0	0	0.314999	0	0	0	0.332878
0.260792	0	0.464502	0	0	0	0	0	0	0	0.274705
0.210621	0	0.475257	0	0	0	0	0	0	0	0.314122
0	0	0.413453	0	0.210053	0	0	0	0	0	0.376494
0	0	0.419547	0	0	0	0	0	0	0	0.580453
0	0	0.360147	0	0	0	0	0	0	0	0.639853
0	0	0.647568	0	0	0	0	0	0	0	0.352432
0	0	0.689154	0	0	0	0	0	0	0	0.310846
0	0	0.682852	0	0	0	0	0	0	0	0.317148
0	0	0.482541	0	0	0	0	0	0	0	0.517459
0	0	0.592546	0	0	0	0	0	0	0	0.407454
0	0	0.518914	0	0	0	0	0	0	0	0.481086
0	0	0.542003	0	0	0	0	0	0	0	0.457997
0	0	0.547765	0	0	0	0	0	0	0	0.452235
0	0	0.561436	0	0	0	0	0	0	0	0.438564
0	0	0.568766	0	0	0	0	0	0	0	0.431234
0	0	0.471189	0	0	0	0	0.181127	0	0	0.347684
0	0	0.478683	0	0	0	0	0.303501	0	0	0.217817
0	0	0.504901	0	0	0	0	0.267614	0	0	0.227485
0	0	0.514813	0	0	0	0	0.256917	0	0	0.228269
0	0	0.378247	0	0	0	0	0.351916	0	0	0.269836
0	0	0.354795	0	0	0	0	0.398073	0	0	0.247131
0	0	0.371597	0	0	0	0	0.418417	0	0	0.209986
0	0	0.378866	0	0	0	0	0.40673	0	0	0.214404
0	0	0.37369	0	0	0	0	0.270093	0	0	0.356217
0	0	0.395904	0	0	0	0	0.292622	0	0	0.311474
0	0	0.263921	0	0	0	0	0.339445	0	0	0.396634
0	0	0.318317	0	0	0	0	0.315536	0	0	0.366147
0	0	0.804621	0	0	0	0	0.195379	0	0	0
0	0	0.808363	0	0	0	0	0.191637	0	0	0
0	0	0.686655	0	0	0	0	0.313345	0	0	0
0	0	0.699882	0	0	0	0	0.300118	0	0	0
0	0	0.731814	0	0	0	0	0.268186	0	0	0
0	0	0.757405	0	0	0	0	0.242595	0	0	0
0	0	0.745761	0	0	0	0	0.254239	0	0	0
0	0	0.751076	0	0	0	0	0.248924	0	0	0
0	0	0.60179	0	0	0	0	0.39821	0	0	0
0	0	0.59947	0	0	0	0	0.40053	0	0	0
0	0	0.598166	0	0	0	0	0.401834	0	0	0
0	0	0.573363	0	0	0	0	0.426637	0	0	0
0	0	0.586919	0	0	0	0	0.413081	0	0	0
0	0	0.584818	0	0	0	0	0.415182	0	0	0
0	0	0.619155	0	0	0	0	0.380845	0	0	0
0	0	0.646135	0	0	0	0	0.353865	0	0	0
0	0	0.638497	0	0	0	0	0.361503	0	0	0
0	0	0.640242	0	0	0	0	0.359758	0	0	0
0	0	0.639724	0	0	0	0	0.360276	0	0	0
0	0	0.45865	0	0	0	0	0.54135	0	0	0
0	0	0.456826	0	0	0	0	0.543174	0	0	0
0	0	0.457227	0	0	0	0	0.542773	0	0	0
0	0	0.44445	0	0	0	0	0.55555	0	0	0
0	0	0.436139	0	0	0	0	0.563861	0	0	0
0	0	0.526129	0	0	0	0	0.473871	0	0	0
0	0	0.539672	0	0	0	0	0.460328	0	0	0
0	0	0.542308	0	0	0	0	0.457691	0	0	0
0	0	0.544094	0	0	0	0	0.455906	0	0	0
0	0	0.504483	0	0	0	0	0.495517	0	0	0
0	0	0.504188	0	0	0	0	0.495812	0	0	0
0	0	0.507021	0	0	0	0	0.492979	0	0	0
0	0	0.50868	0	0	0	0	0.49132	0	0	0
0	0	0.481496	0	0	0	0	0.518504	0	0	0
0	0	0.49465	0	0	0	0	0.50535	0	0	0
0	0	0.489609	0	0	0	0	0.510391	0	0	0
0	0	0.308483	0.231782	0	0	0	0	0	0	0.459735
0.180321	0	0.37404	0.248466	0	0	0	0	0	0	0.197173
0.133677	0	0.319794	0.257836	0	0	0	0	0	0	0.288693
0	0	0.308056	0.278128	0	0	0	0.133205	0	0	0.280612
0	0	0.232169	0.292523	0	0	0	0.178932	0	0	0.296376
0	0	0.257443	0.414646	0	0	0	0.126505	0	0	0.201406
0	0	0.306903	0.461037	0	0	0	0	0	0	0.232061
0	0	0.428756	0.238378	0	0	0	0.180456	0	0	0.15241
0	0	0.49312	0.326856	0	0	0	0.180024	0	0	0
0	0	0.484089	0.367905	0	0	0	0.148006	0	0	0
0	0	0.480972	0.350432	0	0	0	0.168596	0	0	0
0	0	0.470288	0.353589	0	0	0	0.176123	0	0	0
0	0	0.442625	0.342894	0	0	0	0.214481	0	0	0
0	0	0.420317	0.376785	0	0	0	0.202899	0	0	0
0	0	0.424662	0.390783	0	0	0	0.184555	0	0	0
0	0	0.412591	0.39951	0	0	0	0.187899	0	0	0
0	0	0.36024	0.398222	0	0	0	0.241538	0	0	0
0	0	0.347997	0.382415	0	0	0	0.269588	0	0	0
0	0	0.33424	0.35438	0	0	0	0.311379	0	0	0
0	0	0.355957	0.327134	0	0	0	0.316908	0	0	0
0	0	0.372713	0.328184	0	0	0	0.299102	0	0	0
0	0	0.403596	0.300634	0	0	0	0.29577	0	0	0
0	0	0.404531	0.329425	0	0	0	0.266044	0	0	0
0	0	0.390155	0.341752	0	0	0	0.268093	0	0	0
0	0	0.388894	0.355046	0	0	0	0.25606	0	0	0
0	0	0.544645	0.325147	0	0	0	0.130208	0	0	0
0	0	0.567104	0.284211	0	0	0	0.148685	0	0	0
0	0	0.546548	0.298835	0	0	0	0.154617	0	0	0
0	0	0.603397	0.28338	0	0	0	0.113223	0	0	0
0	0	0.63613	0.23607	0	0	0	0.1278	0	0	0
0	0	0.579149	0.218729	0	0	0	0.202123	0	0	0
0	0	0.530401	0.196538	0	0	0	0.273062	0	0	0
0	0	0.506967	0.247925	0	0	0	0.245107	0	0	0
0	0	0.516076	0.251172	0	0	0	0.232752	0	0	0
0	0	0.484255	0.24544	0	0	0	0.270305	0	0	0
0	0	0.473435	0.229556	0	0	0	0.29701	0	0	0
0	0	0.594997	0.405003	0	0	0	0	0	0	0
0	0	0.53838	0.46162	0	0	0	0	0	0	0
0	0	0.492633	0.507367	0	0	0	0	0	0	0
0	0	0.502642	0.497358	0	0	0	0	0	0	0
0	0	0.60985	0.243559	0.146591	0	0	0	0	0	0
0	0	0.671461	0.328539	0	0	0	0	0	0	0
0	0	0.694352	0.305648	0	0	0	0	0	0	0
0	0	0.68966	0.31034	0	0	0	0	0	0	0
0	0	0.724668	0.275332	0	0	0	0	0	0	0
0	0	0.740264	0.259736	0	0	0	0	0	0	0
0	0	0.749499	0.250501	0	0	0	0	0	0	0
0	0	0.747775	0.252225	0	0	0	0	0	0	0
0	0	0.7713	0.2287	0	0	0	0	0	0	0
0	0	0.794769	0.205231	0	0	0	0	0	0	0
0	0	0.44412	0	0	0	0.347105	0.208775	0	0	0
0	0	0.584434	0	0.19089	0	0.224676	0	0	0	0
0	0	0.574182	0.199645	0	0	0.226173	0	0	0	0
[truncated: 1,884 more rows]

## Sheet: 03_E
	Cytosol	ER	Golgi	Lysosome	Mitochondria	Nucleus	Peroxisome	PM	Chromatin	Nucleolus	Ribosome
Cytosol	92.8571	0	0	0	0	7.14286	0	0	0	0	0
ER	0	94.6023	1.98864	1.70455	0.284091	0	0.284091	0	0	0	1.13636
Golgi	0	4.25532	91.4894	2.12766	0	0	0	2.12766	0	0	0
Lysosome	0	1.14943	3.44828	54.4061	0	0	0	40.9962	0	0	0
Mitochondria	0	0	0	0	99.5807	0	0.419287	0	0	0	0
Nucleus	1.5873	0	0	0	0	66.9841	0	0	10.7937	17.7778	2.85714
Peroxisome	0	0	0	0	23.5294	0	76.4706	0	0	0	0
PM	0	0	0	0	0	0	0	100	0	0	0
Chromatin	0	0	3.26797	0	0	0.653595	0	2.61438	92.8105	0.653595	0
Nucleolus	0	0	0	0	0	0	0	0	0	100	0
Ribosome	0	0	0	0	0	2.40964	0	0	0	0	97.5904
unknown	19.2893	6.72589	11.1675	5.45685	5.71066	11.5482	0.126904	23.3503	9.01015	3.29949	4.31472

## Sheet: 03_F
Annotation Enrichment Analysis
Category type	Category value	Category Size	Enrichment Factor	P-Value	Benj. Hoch. FDR
GOCC name	COPII vesicle coat	6	10.745	6.213e-07	8.4555e-05
GOCC name	ER-mitochondrion membrane contact site	3	10.745	0.00079891	0.023521
GOCC name	MHC class I peptide loading complex	2	10.745	0.0086355	0.069377
GOCC name	phosphatidylinositol 3-kinase complex	6	8.9542	3.6931e-05	0.0024646
GOCC name	autophagic vacuole membrane	4	8.0588	0.0029009	0.06753
GOCC name	ER to Golgi transport vesicle membrane	19	4.5243	0.00013697	0.0066749
Keywords	Unfoldedproteinresponse	14	3.8375	0.0057032	0.12547
GOBP slim name	protein glycosylation	72	2.2386	0.0013525	0.028803

## Sheet: 03_G
RL Hierarchical Clusterin for control vs. LPS treated
Cytosol	ER	Golgi	Lysosome	Mitochondria	Nucleus	Peroxisome	PM	Chromatin	Nucleolus	Ribosome
0	0	-1	0	0	0	0	0	0	0	1
0	-0.485947	0	-0.255052	0	0	0	-0.259001	0	0	1
0.321768	0	0	0	0	-0.479653	0	0	-0.520347	0	0.678232
0	0	-0.285602	0	0	-0.321684	0	0	-0.392714	0	1
0	0	-0.545925	0	0	0	0	0	-0.454075	0	1
0	0	0	0	0	0.394163	0	0	-1	0	0.605837
0	0	0	0	0	0.390675	0	0	-1	0	0.609325
0	0	0	0	0	0.323062	0	0	-1	0.326978	0.34996
0	0	0	0	0	0.352443	0	0	-1	0.430678	0.216879
0	0	0	0	0	0	0	0	-0.55921	0.527218	0.0319915
0	0	0	0	0	0.190001	0	0.0835476	-0.446104	0.276583	-0.104027
0	0	0	0	0	0.225189	0	0.06667	-0.502279	0.342779	-0.132358
0	0	0	0	0	0.256335	0	0	-0.661481	0.405145	0
0	0	0	0	0	0.278713	0	0	-0.68092	0.268436	0.133771
0.142868	0	0.115114	0	0	-0.362534	0	0.133807	-0.364502	0	0.335247
0.14246	0	0	0	0	-0.289114	0	0.106746	-0.220383	0	0.260291
0	0	0	0	0	0	0	0.143965	-0.584027	0	0.440062
0.102469	0	0	0	0	0	0	0.161777	-0.505319	0	0.241073
0.154688	0	0	0	0	-0.152544	0	0.176348	-0.363713	0	0.185221
0	0	0	0	0	0.124392	0	0	-0.355527	-0.322618	0.553752
-0.208061	0	0	0	0	0.295822	0	0.0941686	-0.36627	0	0.18434
0	0	0	0	0	0.304126	0	0	-0.676549	0	0.372423
0	0	0	0	0	0.312344	0	0	-0.426767	-0.133664	0.248086
0	0	0	0	0	0.297659	0	0	-0.502693	-0.14278	0.347813
0	0	0	0	0	0.311453	0	0	-0.532493	-0.0843506	0.30539
-0.291088	0	0	0	0	-0.572322	0	0.496851	0	0	0.366559
-0.163818	0	0	0	0	-0.475692	0	0	0	0	0.639509
0.133789	0	0	0	0	-0.654488	0	0.0881101	0.189964	0	0.242625
0	0	0	0	0	-0.533497	0	0	0.257811	0	0.275686
0.154459	0	0	0	0	-0.656831	0	0	0	0	0.502372
0.142281	0	0	0	0	-0.555859	0	0	0	0	0.413579
0.142143	0	0	0	0	-0.551319	0	0	-0.0166248	0	0.425801
0.211786	0	0	0	0	-0.585232	0	0.174766	0	0	0.19868
0.0791759	0	0	0	0	-0.513485	0	0.135426	0	0	0.298883
-0.35769	0.365747	0	0	0	-0.343895	0.365337	0	0	0	-0.0294995
-0.200223	0.365418	0	0	0	-0.407598	0	0	0	0	0.242403
-0.0881466	0	-0.254276	0	0	-0.37559	0	0.288988	0.303817	0	0.125208
-0.449142	0	0	0	0	-0.0591319	0	0	0.209268	0	0.299006
-0.396367	0	0	0	0	-0.109559	0	0	0.280829	0	0.225097
-0.318812	0	0	0	0	-0.358481	0	0.16744	0.306568	0	0.203284
-0.183172	0	0	0	0	-0.346629	0	0	0.286412	0	0.243389
-0.259977	0	0	0	0	-0.360121	0	0	0.413462	0	0.206636
0.481373	0	0	0	0	0.231952	0	-0.371118	-0.342208	0	0
0.600649	0	0	0	0	0	0	-0.483769	-0.354975	0	0.238095
0.662301	0	-0.354714	0	0	0	0	-0.307587	0	0	0
0.360509	0	-0.457227	0	0	0	0	-0.18074	0	0	0.277457
0.712016	0	0	0	-0.332383	0	0	0	0	0	-0.379633
0.295831	0	-0.28907	0	0	-0.455925	0	0.449164	0	0	0
0.52041	0	-0.324766	0	0	-0.425685	0	0.17868	0	0	0.0513608
0.275686	0	-0.320106	0	0	0	0	0.258598	-0.214177	0	0
0.303097	0	0	0	0	-0.318915	0	0.330671	-0.314852	0	0
0.214747	0	0	0	0	-0.375709	0	0.193082	0.172833	0	-0.204953
0.246021	0	0	0	0.357	-0.317701	0	0	0	0	-0.28532
0.269986	0	0	0	0.320815	-0.258697	0	0	0	0	-0.332104
0.66608	0	0	0	0	-0.322301	0	-0.343779	0	0	0
0.385767	0	0	0	0.207991	-0.593758	0	0	0	0	0
0.408131	0	0	0	0	-0.542301	0	0.13417	0	0	0
0.430304	0	0	0	0	-0.613928	0	0.183624	0	0	0
0.526694	0	0	0	0	-0.526694	0	0	0	0	0
0.594099	0	0	0	0	-0.594099	0	0	0	0	0
0.564355	0	0	-0.227861	0	-0.336495	0	0	0	0	0
0.592528	0	0	0	-0.280255	-0.312273	0	0	0	0	0
0.685192	0	0	0	-0.21522	-0.300893	0	0	0	0	-0.169078
0	0	-0.279181	-0.275332	0	0	0	0	0	0	0.554513
0	0	-0.308483	-0.231782	0	0	0	0	0	0	0.540265
0	0	-0.400627	-0.250501	0	0	0	0.254957	0	0	0.396171
0.11202	0	-0.289434	-0.234016	0	0	0	0.198954	0	0	0.212478
0.127131	0	-0.309581	-0.299545	0	0	0	0.112953	0	0	0.369042
0	0	-0.38466	0	0	0	0	0.336738	0	-0.197796	0.245718
0.0664114	0	-0.338562	0	0	0	0	0.102488	-0.171641	0	0.341304
0	0	-0.511315	0	0	0	0	0.126673	0.0835913	0	0.30105
0.193124	0	-0.539672	0	0	0	0	0.0582007	0	0	0.288347
-0.247886	0	-0.29639	0.146065	0	0	0	0	0	0	0.398211
-0.210621	0	-0.475257	0	0	0	0	0	0	0	0.685878
0	0	-0.518914	0	0	0	0	0	0	0	0.518914
0	0	-0.647568	0	0	0	0	0	0	0	0.647568
0	0	-0.53838	-0.46162	0	0	0	0.210738	0	0	0.789262
0	0	-0.390155	-0.341752	0	0	0	-0.268093	0	0	1
-0.230746	0	0	0	-0.140521	-0.0551431	0	0	-0.255664	0	0.682074
-0.647269	0	0	0	0	0	0	0	0	0	0.647269
-0.50463	0	0	0	0	0	0	0	0	0	0.50463
0	-0.212201	0	0	-0.280602	0	-0.243858	0.317093	0	0	0.419568
0	-0.509692	0	0	0	0	0	0	0	0	0.509691
0	-0.365034	0	0	0	0	-0.239652	0	0	0	0.604686
0	-0.252279	0	0	0	0	-0.298039	0	0	0	0.550319
0.0859108	0	-0.0460811	0	0	0	0	-0.518504	0	0	0.478674
0	0	-0.279382	0	0	0	0	-0.300118	0	0	0.5795
0.0815028	0	0	0	0	0.288298	0	-0.393679	-0.189841	0	0.21372
-0.341545	0	0	0	0	0.374734	0	-0.296971	0	0	0.263783
0	0	-0.316601	0	0	0.471671	0	0	0	-0.402168	0.247099
0	0	-0.271427	0	0	0.263979	0	0	0.16808	-0.426719	0.266087
0	0	-0.277047	0	0	0.312133	0	0	0	-0.420953	0.385868
0.0822045	0	-0.296708	0	0	0.292601	0	0	0	-0.386493	0.308395
0	0	-0.459149	0	0	0.331815	0	0	0	-0.189304	0.316639
0	0	-0.324129	0	0	0.295006	0	-0.215939	0	-0.0876239	0.332686
-0.145911	0	0	0	0	0.386096	0	0	0.231651	-0.464872	-0.00696465
0	0	-0.232479	0	0	0.24199	0	0	0.318748	-0.328259	0
0	0	0	0	0	0.604123	0	0	0	-0.604123	0
-0.0922795	0	0	0	0	0.626992	0	-0.118874	0	-0.415838	0
0	0	0	0	0	0.358477	0	0	0	-0.524286	0.165809
0	0	0	0	0	0.295089	0	-0.23246	0	-0.423492	0.360863
0	0	0	0	-0.222382	0	0	0	0.37824	-0.430641	0.274782
0	0	0	0	0	-0.0631503	0	0	0.297303	-0.449894	0.215741
0	0	0	0	0	0	-0.261382	0	0	-0.348385	0.609767
0	0	0	0	0	0	0	0	0	-0.622414	0.622414
0	0	-0.411413	0	0	0	0	-0.409334	0.1978	0.398369	0.224579
0	0	-0.542308	0	0	0	0	-0.457691	0.707472	0	0.292528
0.102896	0	-0.395904	0	0	0	0	-0.292622	0.610171	0	-0.0245408
0	0	-1	0	0	0	0	0	0.638495	0	0.361505
0	0	-1	0	0	0	0	0	0.575963	0	0.424037
0	0	-0.757405	0	0	0	0	-0.242595	0.434735	0	0.565265
0	0	-0.44445	0	0	0	0	-0.178574	0.289552	0	0.333472
0	0	-0.561436	0	0	0	0	0	0.379804	0	0.181632
0	0	-0.617671	0	0	0	0	0	0.246252	0	0.371419
0	0	-0.640242	0	0	0	0	-0.0772845	0.390704	0	0.326822
0.109558	-0.434708	-0.26897	0	0	0	0	0.153262	0.440858	0	0
0	-0.259156	-0.505986	0	0.25893	0	0.506212	0	0	0	0
0	-0.430794	-0.259041	0	0.229185	0	0.270315	0	0	0	0.190335
0	0.357103	-0.29841	0	-0.306753	0	0	0	0	0	0.24806
0	0.572509	-0.317596	0	0	0	-0.254914	0	0	0	0
0	0.573689	-0.281295	0	-0.103128	0	-0.189266	0	0	0	0
0	0.559802	-0.195712	0	-0.144258	0	-0.219832	0	0	0	0
0	0.624375	-0.224785	0	-0.189349	0	0	0	0	0	-0.210241
0	0.535097	-0.345391	0	-0.189706	0	0	0	0	0	0
0	0.682886	-0.438701	0	-0.244186	0	0	0	0	0	0
0	0.667203	-0.392512	0	-0.274692	0	0	0	0	0	0
0	0.382322	-0.673411	0	0	0	0.291089	0	0	0	0
0	0.480181	-0.684777	0	0	0	0	0	0	0	0.204596
0	0.458822	-0.681538	0	0	0	0	0	0	0	0.222717
0	0.517167	-0.345559	0	0	0	0	-0.171608	0	0	0
0	0.584778	-0.584778	0	0	0	0	0	0	0	0
0	0.568521	-0.568521	0	0	0	0	0	0	0	0
0	0.537525	-0.537525	0	0	0	0	0	0	0	0
0	0.50351	-0.50351	0	0	0	0	0	0	0	0
0	0.514802	-0.514802	0	0	0	0	0	0	0	0
0	0.518166	-0.518166	0	0	0	0	0	0	0	0
0	0.314035	-0.192907	0	0.297889	0	-0.263191	0	0	0	-0.155826
0.328909	0.378861	-0.20494	-0.251197	0	0	0	0	0	0	-0.251634
0	0.554641	0.138457	-0.461037	0	0	0	0	0	0	-0.232061
0	0.608723	0	-0.314453	0	0	0	0	0	0	-0.29427
-0.210134	0.539688	0	0	0	0	0	0	0	0	-0.329553
0	0.528024	0	0	-0.108081	0	-0.253729	0	0	0	-0.166214
0	0.606858	-0.00975838	-0.19489	-0.131568	0	-0.270641	0	0	0	0
0	0	-0.689154	0.849783	0	0	0	0.150217	0	0	-0.310846
-0.497042	0	-0.246111	0.683711	0	0	0	-0.256847	0	0	0.316289
0	0.164608	0	0.473061	0	0	0	0	0	0	-0.63767
0	0.204262	0	0.361471	-0.155232	0	0	0	0	0	-0.410501
0	0.0677755	0	0.434862	-0.424255	0	0	0	0	0	-0.0783816
-0.319726	0.0805674	0	0.49237	-0.253211	0	0	0	0	0	0
-0.361647	0	0	0.5797	0	0	0	-0.218053	0	0	0
-0.437826	0	0	0.721921	0	0	0	0	0	0	-0.284096
-0.175472	-0.0636007	0	0.525962	0	0	0	0	0	0	-0.286889
-0.147221	0.0987504	0	0.479111	-0.127024	0	0	0	0	0	-0.303616
-0.111295	0.271208	-0.26096	0.256221	0	0	0	0	0	0	-0.155174
0	0.109579	-0.261118	0.434136	-0.121466	0	0	0	0	0	-0.161131
-0.3312	0.375322	-0.257606	0.213484	0	0	0	0	0	0	0
-0.387334	0.229789	-0.329498	0.487043	0	0	0	0	0	0	0
0	0.353265	-0.675383	0.322118	0	0	0	0	0	0	0
0	0	-0.50868	0.343025	0	0	0	0.165655	0	0	0
0	0	-0.502642	0.337932	0	0	0	0.164709	0	0	0
0	-0.084878	0	0.329179	0	0	0	-0.430044	0	0	0.185742
0	0	0	0.502004	0	0	0	-0.502004	0	0	0
0.165077	0	0.101928	0.380639	0	0	0	-0.647644	0	0	0
0	0.255689	-0.271857	0.374011	0	0	0	-0.357843	0	0	0
0	0	-0.443366	0.509663	0	0	0	-0.0662971	0	0	0
0	0	-0.389769	0.530599	0	0	0	-0.14083	0	0	0
0.116159	0	-0.270943	0.465624	0	0	0	-0.310839	0	0	0
0	0	-0.372713	0.671816	0	0	0	-0.299102	0	0	0
0	0	-0.349336	0.624032	0	0	0	-0.274696	0	0	0
0	0	-0.265583	0.557459	0	0	0	-0.291876	0	0	0
0	0	-0.196954	0.573412	0	0	0	-0.376459	0	0	0
0	0	-0.221471	0.622078	0	0	0	-0.400607	0	0	0
-0.685051	0	0	0	0	0.358618	0	0.326433	0	0	0
-0.795358	0	0	0	0	0.465836	0	0.329522	0	0	0
-0.52809	0	0	0	0	0.31283	0	0	0.215261	0	0
-0.572568	0	0	0	0	0.572568	0	0	0	0	0
-0.35653	0	0	0	0	-0.340821	0	0.697351	0	0	0
-0.519341	0	0	0	0	0	0	0.519341	0	0	0
-0.621145	0	0	0	0	0	0	0.621145	0	0	0
-0.51799	0	-0.291866	0.338396	0	0	0	0.47146	0	0	0
-0.50888	0	0	0.355549	0	0	0	0.153332	0	0	0
-0.649207	0	0	0.508497	0	0	0	0.14071	0	0	0
-0.891926	0.368453	0	0.523473	0	0	0	0	0	0	0
-0.920321	0.340579	0.242071	0.337672	0	0	0	0	0	0	0
-0.426072	0	0.656462	0	0	0	0	-0.23039	0	0	0
-0.680561	0	0.4044	0	0	0	0	0	0	0	0.276161
-0.496148	0	0.3134	0.193321	0	0	0	-0.0105734	0	0	0
0	0	-0.286554	0	0.657626	0	0	0	-0.371072	0	0
0.303714	-0.304471	-0.316869	0	0.517035	0	-0.199409	0	0	0	0
0	0	0	0	0.653557	0	-0.292367	0	0	0	-0.36119
0	0	-0.253969	0	0.654152	0	-0.400184	0	0	0	0
0	-0.261183	0	0	0.595884	0	-0.334702	0	0	0	0
0	-0.264942	0.232262	0	0.427253	0	0	-0.219635	0	0	-0.174938
-0.32092	-0.414104	0	0	0.551569	0	0.448431	0	0	0	-0.264976
0	0	0.0197706	-0.659791	0	0	0	0.64002	0	0	0
0	0	0	-0.644787	0	0	0	0.644787	0	0	0
0	0	0	-0.630909	0	0	0	0.630909	0	0	0
0	-0.505574	0	-0.330768	0	0	0	0.836342	0	0	0
0.0570886	-0.29614	0	-0.364901	0	0	0	0.603952	0	0	0
0.0555308	-0.252425	0	-0.292657	0	0	0	0.489551	0	0	0
0	-0.384964	-0.192604	0.220557	0	0	0	0.501579	0	0	-0.144567
0	0	-0.275671	-0.235771	0	0	0	0.511443	0	0	0
0	0	-0.368985	-0.232864	0	0	0	0.601849	0	0	0
0	0	-0.322911	-0.250072	0	0	0	0.572983	0	0	0
0	0	-0.32427	-0.214851	0	0	0	0.539121	0	0	0
0.0722249	0	-0.371597	0	0	0	0	0.509358	0	0	-0.209986
0.0752751	0	-0.586919	0	0	0	0	0.511644	0	0	0
0	0	-0.484089	-0.034376	0	0	0	0.518465	0	0	0
0	-0.674994	0.405446	0	0	0	0.372997	0	0	0	-0.103448
0	-0.31408	-0.101478	0.333469	0	0	0	0.173907	0	0	-0.091818
0.0647541	-0.372463	0	0.535882	0	0	0	0	0	0	-0.228173
0	-0.251083	0	0.515312	0	0	0	0	0	0	-0.264228
0	-0.287021	0	0.523177	0	0	0	0	0	0	-0.236156
0	-0.706369	0.299916	0.339439	0	0	0	0.0670136	0	0	0
0	-0.703527	0.297003	0.2954	0	0	0	0.111125	0	0	0
0	-0.648419	0.3647	0.283719	0	0	0	0	0	0	0
0	-0.644162	0.3107	0.333463	0	0	0	0	0	0	0
0	-0.592059	0.291638	0.300421	0	0	0	0	0	0	0
0	-0.599965	0.325858	0.274107	0	0	0	0	0	0	0
0	-0.621631	0.331323	0.290308	0	0	0	0	0	0	0
0	-0.57391	0.226618	0.347292	0	0	0	0	0	0	0
0	-0.602947	0.245541	0.357405	0	0	0	0	0	0	0
0	-0.520693	0.247249	0.273444	0	0	0	0	0	0	0
0	-0.551985	0.279323	0.272661	0	0	0	0	0	0	0
0	-0.549186	0.28427	0.264917	0	0	0	0	0	0	0
0	-0.562803	0.267976	0.294827	0	0	0	0	0	0	0
0	-0.560298	0.273679	0.286619	0	0	0	0	0	0	0
0	-0.553601	0.25918	0.294421	0	0	0	0	0	0	0
0	-0.541676	0.250423	0.291253	0	0	0	0	0	0	0
0	-0.44559	0.460677	0.129754	0	0	0	0.0958843	0	0	-0.240725
0	-0.566892	0.364455	0.388511	0	0	0	0	0	0	-0.186074
0	-0.472623	0.389809	0.303336	0	0	0	0	0	0	-0.220522
0	-0.203492	0.272787	0.286397	0	0	0	0	0	0	-0.355692
0	-0.404243	0.299764	0.330755	0	0	0	0	0	0	-0.226276
0	-0.362266	0.291441	0.311767	0	0	0	0	0	0	-0.240941
0	-0.280474	0.249455	0.313977	0	0	0	0	0	0	-0.282959
0	-0.318791	0.251877	0.300467	0	0	0	0	0	0	-0.233553
0	-0.765616	1	-0.234384	0	0	0	0	0	0	0
0	-0.774897	0.731865	0	0	0	0	0	0	0	0.0430316
0	-0.509535	0.741139	0	0	0	0	-0.0438661	0	0	-0.187739
0	-0.583383	0.619865	0	0	0	0	0	0	0	-0.0364822
0	-0.532177	0.532177	0	0	0	0	0	0	0	0
0	-0.542525	0.542525	0	0	0	0	0	0	0	0
0	-0.45474	0.754902	-0.262765	0	0	-0.282496	0.245098	0	0	0
0	-0.474265	0.807383	-0.525735	0	0	0	0.192617	0	0	0
0	-0.523225	0.600794	-0.232594	0	0	0	0.16019	0	0	-0.00516522
0	-0.21168	0.571253	-0.359573	0	0	0	0	0	0	0
0	-0.300202	0.574804	-0.274601	0	0	0	0	0	0	0
0	-0.481612	0.743309	-0.261697	0	0	0	0	0	0	0
0	-0.360088	0.680563	-0.27406	0	0	0	0	0	0	-0.0464146
0	-0.33267	0.305562	0	-0.171735	0	0	0	0	0	0.198843
0	-0.62712	0.313189	0	0	0	0	0	0	0	0.313931
0	-0.640608	0.402234	0	0	0	0	0	0	0	0.238374
-0.199121	0	0.148828	-0.323525	0	0	0	0.147635	0	0	0.226183
0	-0.290527	0.385968	-0.355293	0	0	0	0	0	0	0.259852
0	-0.273076	0.36139	-0.310942	0	0	0	0	0	0	0.222627
0	-0.27712	0.166117	-0.251443	0	0	0	0.108592	0	0	0.253854
0	-0.309882	0.167599	-0.192123	0	0	0	0.212317	0	0	0.122089
0	-0.642614	0.384586	0	0	0	0	0.340716	0	0	-0.0826882
0	-0.559775	0.211067	0	0	0	0	0.304637	0	0	0.0440706
0.25373	-0.421112	0.449309	-0.366448	0	0	0	0.296961	0	0	-0.21244
0	-0.428786	0.509227	-0.390963	0	0	0	0.490773	0	0	-0.180251
0	-0.577108	0.525039	-0.422892	0	0	0	0.474961	0	0	0
0	-0.631825	0.564129	-0.368175	0	0	0	0.435871	0	0	0
0	-0.207902	0.319263	-0.385368	0	0	0	0.274007	0	0	0
0	-0.342841	0.40535	-0.329796	0	0	0	0.300729	0	0	-0.0334415
0	-0.444425	0.43613	-0.311213	0	0	0	0.319508	0	0	0
0	-0.395789	0.488458	-0.272229	0	0	0	0.17956	0	0	0
0	-0.280424	0.412638	-0.317349	0	0	0	0.185134	0	0	0
0	-0.28286	0.453185	-0.276422	0	0	0	0.106097	0	0	0
0	-0.381115	0.172031	-0.254135	0	0	0	0.463219	0	0	0
0	-0.44331	0.267525	-0.294462	0	0	0	0.470247	0	0	0
0	-0.337576	0.347926	-0.314556	0	0	0	0.444431	0	0	-0.140224
0	-0.375613	0.316749	-0.213807	0	0	0	0.493721	0	0	-0.22105
0.307389	0	0.23914	-0.257836	0	0	0	0	0	0	-0.288693
0	0	0.414148	-0.448029	0	0	0	0.264754	0	0	-0.230873
0	0	0.239063	-0.278128	0	0	0	0.319676	0	0	-0.280612
0	-0.204762	0.259047	-0.174324	0	0	0	0.326003	0	0	-0.205965
0	0.226276	0.374639	0	0	0	-0.387918	0	0	0	-0.212996
0	0	0.582426	-0.292037	0	0	0	-0.29039	0	0	0
0	0	0.411633	0	0.224111	0	0	0	-0.322501	0	-0.313243
0	0	0.42577	0	0	0	0	0.185404	0	0	-0.611174
0	0.067578	0.542835	0	0	0	0	0	0	0	-0.610413
0	0	0.559686	0	-0.425927	0	0.137765	0	0	0	-0.271524
0	0	0.586547	0	-0.210053	0	0	0	0	0	-0.376494
0	-0.254525	0.514392	0	0	0	0	0	0	0	-0.259867
0	-0.157426	0.510445	0	0	0	0	0	0	0	-0.353018
-0.00169712	0	0.560357	-0.275301	0	0	0	0	0	0	-0.283359
0	-0.132884	0.529416	-0.217648	0	0	0	0	0	0	-0.178884
0	0	0.38464	0	-0.341474	0	-0.361256	0	0.31809	0	0
0	0	0.30727	0	-0.456917	0	-0.0445756	0	0.194222	0	0
0	0	0.571638	0	-0.571638	0	0	0	0	0	0
0	0	0.621899	0	-1	0	0	0	0.378101	0	0
0	0	0.486	0	-0.722524	0	0	0	0.514	0	-0.277476
0	0	0.568524	0	-0.639204	0	0	0	0.431476	0	-0.360796
0	0	0	0	-0.543228	0	0.288755	0	0.254473	0	0
0	0	0	0	-0.241937	0	0.322676	0	0.177611	0	-0.25835
0	0	0	0	-0.372817	0	0.341075	0	0.229612	0	-0.19787
0	0	0	0	-0.313171	0	0.302141	0	0.205215	0	-0.194185
0	0	0	0	-0.318309	0	0.336091	0	0.178799	0	-0.196581
-0.238964	0	0	0	0.26091	0	0	0	0.40562	0	-0.427565
7.48336e-05	0	0	0	0	-0.341312	0	0	0.513322	0	-0.172085
-0.228831	0	0	0	0	-0.396109	0	0	0.62494	0	0
0	0	0	0	0	0	-0.322056	0	0.533179	0	-0.211123
0	0	0	0	-0.147896	0	0	0	0.512543	0	-0.364647
0	0	0	0	-0.2613	0	0	0	0.533476	0	-0.272176
