# Supplementary material for: C-COMPASS: a user-friendly neural network tool profiles cell compartments at protein and lipid levels
Source: Nat Methods. 2025 Dec 4;23(1):118–30. doi: 10.1038/s41592-025-02880-3 (PMC12791020; doi:10.1038/s41592-025-02880-3)
Supplement: Supplementary file 20 — Tool validation and comparison. [file 41592_2025_2880_MOESM20_ESM.xlsx]

## Sheet: 04_A_left
	COMPARTMENT1	COMPARTMENT2	COMPARTMENT3	COMPARTMENT4
sim_04_06_median_Fr.1	1	1	0.583404	0
sim_04_06_median_Fr.2	0.368821	0.580648	0.42986	0.0512031
sim_04_06_median_Fr.3	0.185004	0.426852	0.716559	0.193715
sim_04_06_median_Fr.4	0.0521434	0.182341	0.46395	0.432934
sim_04_06_median_Fr.5	0.0104354	0.0430523	0.149983	0.482358
sim_04_06_median_Fr.6	0	0	0	1

## Sheet: 04_A_middle_left
	COMPARTMENT1	COMPARTMENT2	COMPARTMENT3	COMPARTMENT4
sim_04_24_median_Fr.1	1	0	0	0
sim_04_24_median_Fr.2	0.484571	0	0	0
sim_04_24_median_Fr.3	0.400406	0	0	0
sim_04_24_median_Fr.4	0.234682	0	0	0
sim_04_24_median_Fr.5	0.115504	0	0	0
sim_04_24_median_Fr.6	0.0266484	0	0	0
sim_04_24_median_Fr.7	0	0.0202665	0	0
sim_04_24_median_Fr.8	0	0.0949888	0	0
sim_04_24_median_Fr.9	0	0.304832	0	0
sim_04_24_median_Fr.10	0	0.570511	0	0
sim_04_24_median_Fr.11	0	0.967242	0	0
sim_04_24_median_Fr.12	0	0.708026	0.0233219	0
sim_04_24_median_Fr.13	0	0.3107	0.127792	0.00319266
sim_04_24_median_Fr.14	0	0.098067	0.330161	0.0432328
sim_04_24_median_Fr.15	0	0.0174395	0.632153	0.169893
sim_04_24_median_Fr.16	0	0	0.863074	0.328695
sim_04_24_median_Fr.17	0	0	0.663946	0.69328
sim_04_24_median_Fr.18	0	0	0.343895	0.960145
sim_04_24_median_Fr.19	0	0	0.1156	0.600568
sim_04_24_median_Fr.20	0	0	0.022106	0.320439
sim_04_24_median_Fr.21	0	0	0	0.16208
sim_04_24_median_Fr.22	0	0	0	0.0452888
sim_04_24_median_Fr.23	0	0	0	0.00849552
sim_04_24_median_Fr.24	0	0	0	0

## Sheet: 04_A_middle_right
	COMPARTMENT1	COMPARTMENT2	COMPARTMENT3	COMPARTMENT4	COMPARTMENT5	COMPARTMENT6	COMPARTMENT7	COMPARTMENT8	COMPARTMENT9	COMPARTMENT10	COMPARTMENT11	COMPARTMENT12
sim_12_14_median_Fr.1	1	1	0.7964	0.336852	0.129892	0	0	0	0	0	0	0
sim_12_14_median_Fr.2	0.270601	0.676456	0.591544	0.422869	0.206254	0.0328969	0	0	0	0	0	0
sim_12_14_median_Fr.3	0.160129	0.376867	0.739875	0.563438	0.412942	0.133802	0.0137519	0.0140242	0	0	0	0
sim_12_14_median_Fr.4	0.0506114	0.248666	0.636772	0.948988	0.545039	0.333697	0.10171	0.0607351	0	0	0	0
sim_12_14_median_Fr.5	0.0100574	0.0798947	0.346577	0.739568	0.944071	0.661661	0.282828	0.175362	0.0288526	0.00785229	0	0
sim_12_14_median_Fr.6	0	0.0181744	0.168984	0.445372	0.65291	0.78197	0.623977	0.391151	0.120318	0.0414504	0.0141875	0
sim_12_14_median_Fr.7	0	0	0.0526268	0.195303	0.379101	0.745658	0.996915	0.662096	0.328226	0.171584	0.0606224	0
sim_12_14_median_Fr.8	0	0	0.00914696	0.0905913	0.216779	0.364653	0.58417	0.871669	0.855471	0.356564	0.184372	0.00263574
sim_12_14_median_Fr.9	0	0	0	0.0203898	0.085813	0.139229	0.27271	0.636068	0.774656	0.544743	0.389342	0.0238722
sim_12_14_median_Fr.10	0	0	0	0	0.0226137	0.0340836	0.0940199	0.443581	0.699278	0.918814	0.713755	0.103872
sim_12_14_median_Fr.11	0	0	0	0	0	0	0.0221313	0.182117	0.313799	0.76162	0.796508	0.231546
sim_12_14_median_Fr.12	0	0	0	0	0	0	0	0.055877	0.129444	0.333333	0.645304	0.421511
sim_12_14_median_Fr.13	0	0	0	0	0	0	0	0.0135399	0.0353333	0.155458	0.367795	0.559978
sim_12_14_median_Fr.14	0	0	0	0	0	0	0	0	0	0.0545121	0.280926	1

## Sheet: 04_A_right
	COMPARTMENT1	COMPARTMENT2	COMPARTMENT3	COMPARTMENT4	COMPARTMENT5	COMPARTMENT6	COMPARTMENT7	COMPARTMENT8	COMPARTMENT9	COMPARTMENT10	COMPARTMENT11	COMPARTMENT12
sim_12_24_median_Fr.1	1	0.804812	0.272744	0	0	0	0	0	0	0	0	0
sim_12_24_median_Fr.2	0.338713	0.623906	0.332967	0.0159353	0	0	0	0	0	0	0	0
sim_12_24_median_Fr.3	0.170763	0.79394	0.678418	0.0620711	0	0	0	0	0	0	0	0
sim_12_24_median_Fr.4	0.0849355	0.551339	0.946173	0.17916	0.0367185	0	0	0	0	0	0	0
sim_12_24_median_Fr.5	0.0222773	0.396172	0.735904	0.397669	0.131795	0.0117536	0	0	0	0	0	0
sim_12_24_median_Fr.6	0.00195503	0.169537	0.368266	0.68751	0.368053	0.055827	0	0	0	0	0	0
sim_12_24_median_Fr.7	0	0.0606919	0.18662	0.959063	0.769647	0.167443	0	0	0	0	0	0
sim_12_24_median_Fr.8	0	0.0134601	0.072712	0.625851	0.863633	0.345656	0	0	0	0	0	0
sim_12_24_median_Fr.9	0	0	0.0139617	0.383085	0.69009	0.710501	0.026064	0	0	0	0	0
sim_12_24_median_Fr.10	0	0	0	0.190835	0.325814	0.863915	0.110609	0	0	0	0	0
sim_12_24_median_Fr.11	0	0	0	0.0584643	0.173124	0.699573	0.298177	0.0175154	0.0063055	0	0	0
sim_12_24_median_Fr.12	0	0	0	0.0126419	0.0410796	0.340179	0.679514	0.0964431	0.05535	0	0	0
sim_12_24_median_Fr.13	0	0	0	0	0	0.177187	0.910079	0.304878	0.171429	0	0	0
sim_12_24_median_Fr.14	0	0	0	0	0	0.0603847	0.568758	0.608472	0.412096	0.0323102	0	0
sim_12_24_median_Fr.15	0	0	0	0	0	0.014034	0.287393	0.975206	0.613181	0.151482	0.0201302	0
sim_12_24_median_Fr.16	0	0	0	0	0	0	0.113542	0.683331	0.769986	0.347894	0.0646742	0
sim_12_24_median_Fr.17	0	0	0	0	0	0	0.0258004	0.295181	0.76136	0.6056	0.180253	0.0176254
sim_12_24_median_Fr.18	0	0	0	0	0	0	0	0.0976513	0.36691	0.841133	0.427517	0.0677978
sim_12_24_median_Fr.19	0	0	0	0	0	0	0	0.0189494	0.179552	0.693109	0.731134	0.1883
sim_12_24_median_Fr.20	0	0	0	0	0	0	0	0	0.0534671	0.315426	0.874727	0.364356
sim_12_24_median_Fr.21	0	0	0	0	0	0	0	0	0.00474127	0.154793	0.654975	0.535178
sim_12_24_median_Fr.22	0	0	0	0	0	0	0	0	0	0.0466374	0.373759	0.77847
sim_12_24_median_Fr.23	0	0	0	0	0	0	0	0	0	0	0.180246	0.544992
sim_12_24_median_Fr.24	0	0	0	0	0	0	0	0	0	0	0.106413	0.753984

## Sheet: 04_B
number of sim. Fractions	mean error (w/o 0)
	4 compartments	6 compartments	8compartments	10 compartments	12 compartments
6	0.534483
8	0.37282	0.559385
10	0.490176	0.377791	0.502091
12	0.233345	0.323312	0.433627	0.502038
14	0.131551	0.337998	0.380037	0.415462	0.419391
16	0.153921	0.19075	0.343509	0.395683	0.394881
18	0.153835	0.22295	0.243866	0.300969	0.356333
20	0.11681	0.193122	0.229448	0.27233	0.319324
22	0.109781	0.182188	0.20373	0.228069	0.257834
24	0.0948745	0.117146	0.157111	0.206638	0.240355

## Sheet: 04_C
number of sim. Fractions	species w/ error < 0.1
	4 compartments	6 compartments	8compartments	10 compartments	12 compartments
6	41.9321
8	49.0509	42.4701
10	46.6741	11.1275	34.3566
12	54.8356	45.8532	37.8103	31.1267
14	63.0792	44.3779	37.6306	31.7765	31.0776
16	63.7383	52.1769	39.3604	30.0508	30.4882
18	64.812	50.2964	44.2361	37.4184	35.7442
20	70.7185	48.2257	44.775	39.8599	35.7639
22	72.8	57.0705	50.5569	44.8052	38.9396
24	76.6341	68.7721	58.2982	47.1514	44.9801

## Sheet: 04_D
no. of fractions	no. of compartments	ratio fract/comp	unassigned species [%]
14	12	1.16667	5.46448
12	10	1.2	6.07933
10	8	1.25	4.3667
16	12	1.33333	1.36635
8	6	1.33333	5.92715
14	10	1.4	2.12944
18	12	1.5	0.846872
12	8	1.5	1.87622
6	4	1.5	4.25213
16	10	1.6	0.545344
20	12	1.66667	0.0520653
10	6	1.66667	0.33284
14	8	1.75	0.101833
18	10	1.8	0
22	12	1.83333	0
24	12	2	0
20	10	2	0
16	8	2	0.0251826
12	6	2	0
8	4	2	0
22	10	2.2	0
18	8	2.25	0
14	6	2.33333	0.0332668
24	10	2.4	0
20	8	2.5	0
10	4	2.5	4.95519
16	6	2.66667	0
22	8	2.75	0
24	8	3	0
18	6	3	0
12	4	3	0
20	6	3.33333	0
14	4	3.5	0
22	6	3.66667	0
24	6	4	0
16	4	4	0
18	4	4.5	0
20	4	5	0
22	4	5.5	0
24	4	6	0

## Sheet: 04_E
scores for 16 fractions
simulated compartments	F1
4	1
6	0.998334
8	0.990475
10	0.978854
12	0.94919

## Sheet: 04_F
Protein	Compartment	Reference	Measured
PROT2096	COMPARTMENT1	0.75	0
PROT928	COMPARTMENT1	1	0.549625
PROT2258	COMPARTMENT1	0.75	1
PROT2066	COMPARTMENT1	0.5	0
PROT3860	COMPARTMENT1	0.25	0
PROT2211	COMPARTMENT1	0.5	0
PROT4068	COMPARTMENT1	0.25	0
PROT2846	COMPARTMENT1	0.5	0
PROT953	COMPARTMENT1	1	1
PROT2267	COMPARTMENT1	0.5	0.661074
PROT3919	COMPARTMENT1	0.25	0
PROT3050	COMPARTMENT1	0.25	0
PROT933	COMPARTMENT1	1	0.71093
PROT4107	COMPARTMENT1	0.25	0
PROT2238	COMPARTMENT1	0.75	1
PROT89	COMPARTMENT1	1	0.558701
PROT73	COMPARTMENT1	1	1
PROT3990	COMPARTMENT1	0.25	0
PROT2185	COMPARTMENT1	0.75	1
PROT2178	COMPARTMENT1	0.75	0
PROT2900	COMPARTMENT1	0.75	1
PROT2240	COMPARTMENT1	0.5	0.534259
PROT2099	COMPARTMENT1	0.75	1
PROT1552	COMPARTMENT1	1	1
PROT2457	COMPARTMENT1	0.25	0
PROT2703	COMPARTMENT1	0.25	0
PROT2042	COMPARTMENT1	0.75	0
PROT984	COMPARTMENT1	1	1
PROT3330	COMPARTMENT1	0.25	0
PROT3279	COMPARTMENT1	0.25	0
PROT2085	COMPARTMENT1	0.75	0
PROT2235	COMPARTMENT1	0.5	0
PROT109	COMPARTMENT1	1	1
PROT2162	COMPARTMENT1	0.5	0
PROT2204	COMPARTMENT1	0.5	0
PROT959	COMPARTMENT1	1	1
PROT3729	COMPARTMENT1	0.5	0
PROT2061	COMPARTMENT1	0.75	0
PROT3640	COMPARTMENT1	0.5	0
PROT4	COMPARTMENT1	1	1
PROT3889	COMPARTMENT1	0.25	0
PROT1910	COMPARTMENT1	1	1
PROT3759	COMPARTMENT1	0.25	0
PROT3315	COMPARTMENT1	0.5	0
PROT105	COMPARTMENT1	1	0.550956
PROT3688	COMPARTMENT1	0.5	1
PROT978	COMPARTMENT1	1	1
PROT2610	COMPARTMENT1	0.25	0
PROT2372	COMPARTMENT1	0.5	0.469038
PROT3948	COMPARTMENT1	0.25	0
PROT2248	COMPARTMENT1	0.5	0
PROT994	COMPARTMENT1	1	0.546404
PROT118	COMPARTMENT1	1	0.505565
PROT3700	COMPARTMENT1	0.5	1
PROT2081	COMPARTMENT1	0.75	0
PROT2644	COMPARTMENT1	0.5	0
PROT887	COMPARTMENT1	1	1
PROT2969	COMPARTMENT1	0.5	0
PROT4026	COMPARTMENT1	0.25	0
PROT1373	COMPARTMENT1	1	0.561714
PROT2063	COMPARTMENT1	0.5	0
PROT2514	COMPARTMENT1	0.25	0
PROT970	COMPARTMENT1	1	0.566286
PROT3653	COMPARTMENT1	0.25	0
PROT977	COMPARTMENT1	1	1
PROT2244	COMPARTMENT1	0.75	0.766902
PROT17	COMPARTMENT1	1	0.419737
PROT3437	COMPARTMENT1	0.25	0
PROT2105	COMPARTMENT1	0.5	0.628073
PROT3414	COMPARTMENT1	0.25	0
PROT62	COMPARTMENT1	1	0.549253
PROT2530	COMPARTMENT1	0.5	0
PROT3654	COMPARTMENT1	0.5	0.594498
PROT2116	COMPARTMENT1	0.5	0.459388
PROT2124	COMPARTMENT1	0.5	0
PROT15	COMPARTMENT1	1	1
PROT3415	COMPARTMENT1	0.25	0
PROT3796	COMPARTMENT1	0.25	0
PROT1952	COMPARTMENT1	1	1
PROT2975	COMPARTMENT1	0.5	0
PROT3850	COMPARTMENT1	0.25	0
PROT3033	COMPARTMENT1	0.25	0
PROT65	COMPARTMENT1	1	0.530525
PROT2436	COMPARTMENT1	0.25	1
PROT2051	COMPARTMENT1	0.5	0
PROT885	COMPARTMENT1	1	0.707682
PROT3730	COMPARTMENT1	0.5	0
PROT3991	COMPARTMENT1	0.25	0
PROT3924	COMPARTMENT1	0.25	0
PROT11	COMPARTMENT1	1	1
PROT3701	COMPARTMENT1	0.5	1
PROT2291	COMPARTMENT1	0.25	0.516371
PROT38	COMPARTMENT1	1	1
PROT2086	COMPARTMENT1	0.5	0.527711
PROT3377	COMPARTMENT1	0.25	0
PROT985	COMPARTMENT1	1	1
PROT3867	COMPARTMENT1	0.25	0
PROT2069	COMPARTMENT1	0.75	0
PROT890	COMPARTMENT1	1	1
PROT2079	COMPARTMENT1	0.5	0
PROT3732	COMPARTMENT1	0.5	0
PROT3511	COMPARTMENT1	0.25	0
PROT3748	COMPARTMENT1	0.5	0
PROT43	COMPARTMENT1	1	0.526412
PROT3978	COMPARTMENT1	0.25	0
PROT3980	COMPARTMENT1	0.25	0
PROT3916	COMPARTMENT1	0.25	0
PROT3812	COMPARTMENT1	0.25	0.861429
PROT35	COMPARTMENT1	1	0.468306
PROT900	COMPARTMENT1	1	0.501682
PROT3229	COMPARTMENT1	0.5	0.50133
PROT2262	COMPARTMENT1	0.5	0
PROT3464	COMPARTMENT1	0.5	0
PROT2171	COMPARTMENT1	0.75	1
PROT3737	COMPARTMENT1	0.5	0
PROT2186	COMPARTMENT1	0.75	0
PROT2172	COMPARTMENT1	0.75	0.68195
PROT3335	COMPARTMENT1	0.25	0
PROT25	COMPARTMENT1	1	0.53772
PROT2645	COMPARTMENT1	0.5	0
PROT3791	COMPARTMENT1	0.25	0
PROT3687	COMPARTMENT1	0.5	0
PROT4069	COMPARTMENT1	0.25	0
PROT2155	COMPARTMENT1	0.5	0
PROT2770	COMPARTMENT1	0.5	0
PROT4015	COMPARTMENT1	0.25	0
PROT2153	COMPARTMENT1	0.75	0.901148
PROT91	COMPARTMENT1	1	1
PROT907	COMPARTMENT1	1	1
PROT891	COMPARTMENT1	1	1
PROT3724	COMPARTMENT1	0.5	0.505952
PROT2049	COMPARTMENT1	0.5	0
PROT19	COMPARTMENT1	1	1
PROT2222	COMPARTMENT1	0.75	0
PROT2170	COMPARTMENT1	0.5	0
PROT2108	COMPARTMENT1	0.5	0
PROT3004	COMPARTMENT1	0.5	0
PROT3534	COMPARTMENT1	0.25	0
PROT2215	COMPARTMENT1	0.5	0
PROT4090	COMPARTMENT1	0.5	0
PROT21	COMPARTMENT1	1	1
PROT921	COMPARTMENT1	1	1
PROT3735	COMPARTMENT1	0.5	0
PROT2209	COMPARTMENT1	0.5	0
PROT2349	COMPARTMENT1	0.5	0.51935
PROT71	COMPARTMENT1	1	1
PROT3997	COMPARTMENT1	0.25	0
PROT2122	COMPARTMENT1	0.5	0
PROT991	COMPARTMENT1	1	0
PROT2125	COMPARTMENT1	0.5	1
PROT26	COMPARTMENT1	1	1
PROT42	COMPARTMENT1	1	0.532059
PROT901	COMPARTMENT1	1	1
PROT2087	COMPARTMENT1	0.5	0
PROT943	COMPARTMENT1	1	1
PROT3816	COMPARTMENT1	0.25	0.694311
PROT2963	COMPARTMENT1	0.5	0
PROT2674	COMPARTMENT1	0.5	0
PROT3918	COMPARTMENT1	0.25	0
PROT2756	COMPARTMENT1	0.5	0
PROT3529	COMPARTMENT1	0.5	0
PROT896	COMPARTMENT1	1	0.756397
PROT2924	COMPARTMENT1	0.5	0
PROT2753	COMPARTMENT1	0.5	0
PROT2137	COMPARTMENT1	0.75	0.892413
PROT3600	COMPARTMENT1	0.5	0
PROT2256	COMPARTMENT1	0.5	0.484459
PROT2868	COMPARTMENT1	0.5	0
PROT892	COMPARTMENT1	1	1
PROT3145	COMPARTMENT1	0.25	0
PROT922	COMPARTMENT1	1	1
PROT2764	COMPARTMENT1	0.25	0
PROT2067	COMPARTMENT1	0.75	0.551343
PROT2146	COMPARTMENT1	0.5	0
PROT960	COMPARTMENT1	1	1
PROT3746	COMPARTMENT1	0.5	0.852063
PROT3718	COMPARTMENT1	0.5	1
PROT2252	COMPARTMENT1	0.75	1
PROT2187	COMPARTMENT1	0.5	0
PROT3686	COMPARTMENT1	0.5	0.675816
PROT2199	COMPARTMENT1	0.75	0.618043
PROT2271	COMPARTMENT1	0.75	1
PROT3030	COMPARTMENT1	0.5	0
PROT3231	COMPARTMENT1	0.25	0
PROT3503	COMPARTMENT1	0.25	0
PROT926	COMPARTMENT1	1	0.519643
PROT76	COMPARTMENT1	1	1
PROT2159	COMPARTMENT1	0.75	0.667134
PROT996	COMPARTMENT1	1	1
PROT976	COMPARTMENT1	1	1
PROT4044	COMPARTMENT1	0.25	0
PROT3553	COMPARTMENT1	0.5	0
PROT2797	COMPARTMENT1	0.5	0
PROT3928	COMPARTMENT1	0.25	0
PROT70	COMPARTMENT1	1	1
PROT2210	COMPARTMENT1	0.5	0
PROT2587	COMPARTMENT1	0.5	0
PROT3884	COMPARTMENT1	0.25	0
PROT3822	COMPARTMENT1	0.25	0
PROT2655	COMPARTMENT1	0.5	0
PROT2822	COMPARTMENT1	0.25	0
PROT2255	COMPARTMENT1	0.75	1
PROT920	COMPARTMENT1	1	1
PROT966	COMPARTMENT1	1	0.526372
PROT3255	COMPARTMENT1	0.25	0
PROT962	COMPARTMENT1	1	1
PROT2121	COMPARTMENT1	0.5	0
PROT2386	COMPARTMENT1	0.5	0.563159
PROT3709	COMPARTMENT1	0.5	0
PROT3810	COMPARTMENT1	0.25	0
PROT2183	COMPARTMENT1	0.75	0
PROT2089	COMPARTMENT1	0.5	0.477941
PROT1592	COMPARTMENT1	1	1
PROT2047	COMPARTMENT1	0.75	0.549052
PROT67	COMPARTMENT1	1	0.542725
PROT903	COMPARTMENT1	1	1
PROT104	COMPARTMENT1	1	1
PROT3492	COMPARTMENT1	0.75	1
PROT2191	COMPARTMENT1	0.75	0
PROT3056	COMPARTMENT1	0.5	0
PROT2127	COMPARTMENT1	0.5	0
PROT3935	COMPARTMENT1	0.25	0
PROT2205	COMPARTMENT1	0.75	1
PROT4089	COMPARTMENT1	0.25	0
PROT2253	COMPARTMENT1	0.5	0
PROT3941	COMPARTMENT1	0.25	0
PROT2206	COMPARTMENT1	0.75	0
PROT3195	COMPARTMENT1	0.5	0
PROT2044	COMPARTMENT1	0.5	0
PROT2080	COMPARTMENT1	0.5	0
PROT2269	COMPARTMENT1	0.5	0
PROT3993	COMPARTMENT1	0.25	0
PROT2094	COMPARTMENT1	0.5	0
PROT1438	COMPARTMENT1	1	1
PROT3434	COMPARTMENT1	0.5	0
PROT3996	COMPARTMENT1	0.25	0
PROT2938	COMPARTMENT1	0.5	0
PROT3698	COMPARTMENT1	0.5	0
PROT2219	COMPARTMENT1	0.5	0.511059
PROT2201	COMPARTMENT1	0.75	0
PROT2991	COMPARTMENT1	0.25	0
PROT45	COMPARTMENT1	1	1
PROT74	COMPARTMENT1	1	1
PROT2274	COMPARTMENT1	0.5	0
PROT2141	COMPARTMENT1	0.5	0
PROT55	COMPARTMENT1	1	1
PROT3963	COMPARTMENT1	0.25	0
PROT2273	COMPARTMENT1	0.5	0
PROT3225	COMPARTMENT1	0.25	0
PROT2140	COMPARTMENT1	0.75	1
PROT3914	COMPARTMENT1	0.25	0
PROT3230	COMPARTMENT1	0.5	0.505764
PROT4079	COMPARTMENT1	0.25	0
PROT2758	COMPARTMENT1	0.5	0
PROT2351	COMPARTMENT1	0.25	0.423943
PROT2598	COMPARTMENT1	0.25	0
PROT2834	COMPARTMENT1	0.25	0
PROT999	COMPARTMENT1	1	1
PROT57	COMPARTMENT1	1	1
PROT3548	COMPARTMENT1	0.5	0
PROT3702	COMPARTMENT1	0.5	0
PROT2233	COMPARTMENT1	0.75	1
PROT49	COMPARTMENT1	1	1
PROT2068	COMPARTMENT1	0.5	0
PROT912	COMPARTMENT1	1	1
PROT2340	COMPARTMENT1	0.75	1
PROT942	COMPARTMENT1	1	1
PROT905	COMPARTMENT1	1	0.554588
PROT2169	COMPARTMENT1	0.75	0.77374
PROT3783	COMPARTMENT1	0.25	0
PROT2202	COMPARTMENT1	0.75	0.644535
PROT888	COMPARTMENT1	1	0.50841
PROT3388	COMPARTMENT1	0.25	0
PROT2134	COMPARTMENT1	0.5	0
PROT69	COMPARTMENT1	1	0
PROT4020	COMPARTMENT1	0.25	0
PROT937	COMPARTMENT1	1	1
PROT906	COMPARTMENT1	1	0.524186
PROT3721	COMPARTMENT1	0.5	0.759886
PROT3726	COMPARTMENT1	0.5	0
PROT918	COMPARTMENT1	1	0.537331
PROT3725	COMPARTMENT1	0.5	0
PROT2041	COMPARTMENT1	0.75	1
PROT5	COMPARTMENT1	1	0.53064
PROT3376	COMPARTMENT1	0.5	0
PROT913	COMPARTMENT1	1	1
PROT2227	COMPARTMENT1	0.75	1
PROT2393	COMPARTMENT1	0.25	0.50473
PROT2580	COMPARTMENT1	0.25	0
PROT4040	COMPARTMENT1	0.25	0
PROT983	COMPARTMENT1	1	1
PROT3301	COMPARTMENT1	0.5	0
PROT3479	COMPARTMENT1	0.5	0
PROT3704	COMPARTMENT1	0.5	0.703873
PROT2254	COMPARTMENT1	0.75	0.812149
PROT3866	COMPARTMENT1	0.25	0
PROT3002	COMPARTMENT1	0.25	0
PROT3739	COMPARTMENT1	0.5	0
PROT2497	COMPARTMENT1	0.75	0
PROT3720	COMPARTMENT1	0.5	0
PROT2672	COMPARTMENT1	0.25	0
PROT963	COMPARTMENT1	1	1
PROT2733	COMPARTMENT1	0.25	0
PROT2156	COMPARTMENT1	0.5	0
PROT2098	COMPARTMENT1	0.75	1
PROT3708	COMPARTMENT1	0.5	0
PROT3767	COMPARTMENT1	0.25	0
PROT2095	COMPARTMENT1	0.5	0.553249
PROT81	COMPARTMENT1	1	0.52055
PROT3526	COMPARTMENT1	0.5	0
PROT3960	COMPARTMENT1	0.25	0
PROT3139	COMPARTMENT1	0.25	0
PROT2197	COMPARTMENT1	0.5	0
PROT2237	COMPARTMENT1	0.5	0
PROT2188	COMPARTMENT1	0.5	0
PROT3965	COMPARTMENT1	0.25	0
PROT2088	COMPARTMENT1	0.75	1
PROT2958	COMPARTMENT1	0.5	0
PROT79	COMPARTMENT1	1	1
PROT3166	COMPARTMENT1	0.25	0
PROT3679	COMPARTMENT1	0.25	0
PROT2619	COMPARTMENT1	0.25	0
PROT2358	COMPARTMENT1	0.5	0.445752
PROT944	COMPARTMENT1	1	1
PROT2198	COMPARTMENT1	0.75	0.886418
PROT3912	COMPARTMENT1	0.25	0
PROT2845	COMPARTMENT1	0.25	0
PROT2934	COMPARTMENT1	0.5	0
PROT886	COMPARTMENT1	1	1
PROT110	COMPARTMENT1	1	1
PROT975	COMPARTMENT1	1	1
PROT3945	COMPARTMENT1	0.25	0
PROT992	COMPARTMENT1	1	0.560914
PROT6	COMPARTMENT1	1	1
PROT987	COMPARTMENT1	1	1
PROT2217	COMPARTMENT1	0.75	0.7557
PROT2228	COMPARTMENT1	0.5	0
PROT2229	COMPARTMENT1	0.5	0.522983
PROT2740	COMPARTMENT1	0.5	0
PROT997	COMPARTMENT1	1	1
PROT2128	COMPARTMENT1	0.5	0
PROT2498	COMPARTMENT1	0.5	0
PROT2130	COMPARTMENT1	0.75	0
PROT3706	COMPARTMENT1	0.5	0
PROT2084	COMPARTMENT1	0.5	1
PROT53	COMPARTMENT1	1	0
PROT12	COMPARTMENT1	1	1
PROT2241	COMPARTMENT1	0.75	0
PROT2213	COMPARTMENT1	0.75	1
PROT2165	COMPARTMENT1	0.75	0.500129
PROT4072	COMPARTMENT1	0.25	0
PROT3096	COMPARTMENT1	0.25	0
PROT3968	COMPARTMENT1	0.25	0
PROT2409	COMPARTMENT1	0.25	0
PROT122	COMPARTMENT1	1	1
PROT2190	COMPARTMENT1	0.5	0
PROT895	COMPARTMENT1	1	0.529882
PROT3703	COMPARTMENT1	0.5	0
PROT3106	COMPARTMENT1	0.25	0
PROT2212	COMPARTMENT1	0.5	0
PROT63	COMPARTMENT1	1	1
PROT995	COMPARTMENT1	1	1
PROT2148	COMPARTMENT1	0.75	0.736475
PROT2858	COMPARTMENT1	0.5	0
PROT3304	COMPARTMENT1	0.25	0
PROT2107	COMPARTMENT1	0.5	0
PROT87	COMPARTMENT1	1	1
PROT111	COMPARTMENT1	1	1
PROT40	COMPARTMENT1	1	1
PROT965	COMPARTMENT1	1	0.547328
PROT2232	COMPARTMENT1	0.5	0
PROT77	COMPARTMENT1	1	1
PROT3852	COMPARTMENT1	0.25	0
PROT2114	COMPARTMENT1	0.75	1
PROT2226	COMPARTMENT1	0.5	0
PROT3535	COMPARTMENT1	0.25	0
PROT946	COMPARTMENT1	1	1
PROT2802	COMPARTMENT1	0.5	0
PROT64	COMPARTMENT1	1	1
PROT115	COMPARTMENT1	1	1
PROT2173	COMPARTMENT1	0.75	1
PROT931	COMPARTMENT1	1	0.551576
PROT939	COMPARTMENT1	1	0.512643
PROT2223	COMPARTMENT1	0.5	1
PROT2195	COMPARTMENT1	0.75	0.791378
PROT96	COMPARTMENT1	1	1
PROT3885	COMPARTMENT1	0.25	0
PROT2414	COMPARTMENT1	0.25	0.481327
PROT2633	COMPARTMENT1	0.5	0
PROT2218	COMPARTMENT1	0.5	0
PROT950	COMPARTMENT1	1	1
PROT13	COMPARTMENT1	1	0.541536
PROT899	COMPARTMENT1	1	1
PROT14	COMPARTMENT1	1	1
PROT3197	COMPARTMENT1	0.5	0
PROT3998	COMPARTMENT1	0.25	0
PROT2571	COMPARTMENT1	0.5	0
PROT2214	COMPARTMENT1	0.75	0.558161
PROT2239	COMPARTMENT1	0.75	1
PROT2491	COMPARTMENT1	0.5	0
PROT72	COMPARTMENT1	1	0.569912
PROT3722	COMPARTMENT1	0.5	0
PROT3194	COMPARTMENT1	0.25	0
PROT3714	COMPARTMENT1	0.5	0
PROT2216	COMPARTMENT1	0.5	0
PROT2260	COMPARTMENT1	0.5	0
PROT917	COMPARTMENT1	1	1
PROT99	COMPARTMENT1	1	1
PROT3036	COMPARTMENT1	0.25	0
PROT80	COMPARTMENT1	1	1
PROT2179	COMPARTMENT1	0.5	0
PROT3896	COMPARTMENT1	0.25	0
PROT3167	COMPARTMENT1	0.25	0
PROT4066	COMPARTMENT1	0.25	0
PROT2149	COMPARTMENT1	0.5	0
PROT952	COMPARTMENT1	1	0.824245
PROT3472	COMPARTMENT1	0.5	0.532272
PROT2314	COMPARTMENT1	0.25	0.519091
PROT979	COMPARTMENT1	1	1
PROT902	COMPARTMENT1	1	0
PROT3717	COMPARTMENT1	0.5	0
PROT2264	COMPARTMENT1	0.75	1
PROT2176	COMPARTMENT1	0.5	0.77472
PROT3927	COMPARTMENT1	0.25	0
PROT3747	COMPARTMENT1	0.5	0
PROT1176	COMPARTMENT1	1	1
PROT3982	COMPARTMENT1	0.25	0
PROT66	COMPARTMENT1	1	1
PROT3764	COMPARTMENT1	0.25	0
PROT971	COMPARTMENT1	1	1
PROT23	COMPARTMENT1	1	1
PROT909	COMPARTMENT1	1	0
PROT3745	COMPARTMENT1	0.5	0
PROT3696	COMPARTMENT1	0.5	0
PROT3193	COMPARTMENT1	0.5	0
PROT88	COMPARTMENT1	1	1
PROT44	COMPARTMENT1	1	1
PROT2686	COMPARTMENT1	0.25	0
PROT93	COMPARTMENT1	1	1
PROT20	COMPARTMENT1	1	1
PROT2136	COMPARTMENT1	0.5	0.522438
PROT31	COMPARTMENT1	1	0.573038
PROT2152	COMPARTMENT1	0.75	0.860813
PROT1033	COMPARTMENT1	1	1
PROT2056	COMPARTMENT1	0.5	0
PROT48	COMPARTMENT1	1	1
PROT961	COMPARTMENT1	1	1
PROT32	COMPARTMENT1	1	1
PROT3979	COMPARTMENT1	0.25	0
PROT22	COMPARTMENT1	1	0.546426
PROT2078	COMPARTMENT1	0.5	0.525201
PROT3284	COMPARTMENT1	0.25	0
PROT2865	COMPARTMENT1	0.5	0
PROT3858	COMPARTMENT1	0.25	0
PROT3731	COMPARTMENT1	0.5	0
PROT112	COMPARTMENT1	1	1
PROT3887	COMPARTMENT1	0.25	0
PROT3691	COMPARTMENT1	0.5	0.8407
PROT2142	COMPARTMENT1	0.5	0
PROT4018	COMPARTMENT1	0.25	0
PROT3104	COMPARTMENT1	0.25	0
PROT2500	COMPARTMENT1	0.25	0
PROT2158	COMPARTMENT1	0.5	0.512522
PROT955	COMPARTMENT1	1	0.431076
PROT882	COMPARTMENT1	1	0.535711
PROT60	COMPARTMENT1	1	1
PROT4053	COMPARTMENT1	0.25	0
PROT2203	COMPARTMENT1	0.5	0
PROT2163	COMPARTMENT1	0.5	0
PROT58	COMPARTMENT1	1	1
PROT2247	COMPARTMENT1	0.75	0.435223
PROT30	COMPARTMENT1	1	1
PROT2501	COMPARTMENT1	0.5	0
PROT120	COMPARTMENT1	1	0.562007
PROT108	COMPARTMENT1	1	1
PROT4041	COMPARTMENT1	0.25	0
PROT3994	COMPARTMENT1	0.25	0
PROT3711	COMPARTMENT1	0.5	0
PROT2458	COMPARTMENT1	0.5	0
PROT2243	COMPARTMENT1	0.5	0
PROT95	COMPARTMENT1	1	0.552182
PROT3685	COMPARTMENT1	0.5	0
PROT103	COMPARTMENT1	1	0.560661
PROT2974	COMPARTMENT1	0.5	0
PROT3518	COMPARTMENT1	0.25	0
PROT3743	COMPARTMENT1	0.5	0
PROT968	COMPARTMENT1	1	1
PROT2270	COMPARTMENT1	0.5	0
PROT945	COMPARTMENT1	1	0
PROT2072	COMPARTMENT1	0.75	1
PROT2055	COMPARTMENT1	0.5	0
PROT3719	COMPARTMENT1	0.5	0
PROT947	COMPARTMENT1	1	1
PROT951	COMPARTMENT1	1	1
PROT3462	COMPARTMENT1	0.25	0
PROT3855	COMPARTMENT1	0.25	0
PROT2132	COMPARTMENT1	0.5	0
PROT2048	COMPARTMENT1	0.5	0.477452
PROT2265	COMPARTMENT1	0.75	0.804222
PROT1118	COMPARTMENT1	1	1
PROT981	COMPARTMENT1	1	1
PROT4112	COMPARTMENT1	0.25	0
PROT3440	COMPARTMENT1	0.5	0
PROT3808	COMPARTMENT1	0.25	0
PROT3771	COMPARTMENT1	0.25	0.762211
PROT24	COMPARTMENT1	1	1
PROT3635	COMPARTMENT1	0.25	0
PROT4030	COMPARTMENT1	0.5	0
PROT3238	COMPARTMENT1	0.5	0
PROT3774	COMPARTMENT1	0.25	0
PROT2444	COMPARTMENT1	0.25	0
PROT2113	COMPARTMENT1	0.75	0
PROT2668	COMPARTMENT1	0.5	0
PROT86	COMPARTMENT1	1	1
PROT2161	COMPARTMENT1	0.75	0.668816
PROT3182	COMPARTMENT1	0.5	0
PROT2981	COMPARTMENT1	0.25	0
PROT2129	COMPARTMENT1	0.75	0
PROT3923	COMPARTMENT1	0.25	0
PROT2071	COMPARTMENT1	0.75	0
PROT3057	COMPARTMENT1	0.5	0.483189
PROT36	COMPARTMENT1	1	1
PROT923	COMPARTMENT1	1	1
PROT54	COMPARTMENT1	1	1
PROT10	COMPARTMENT1	1	0.543418
PROT4128	COMPARTMENT1	0.25	0
PROT2809	COMPARTMENT1	0.5	0
PROT107	COMPARTMENT1	1	1
PROT2160	COMPARTMENT1	0.5	0
PROT2993	COMPARTMENT1	0.25	0.541606
PROT100	COMPARTMENT1	1	1
PROT3258	COMPARTMENT1	0.25	0
PROT2181	COMPARTMENT1	0.75	0.61248
PROT78	COMPARTMENT1	1	1
PROT4121	COMPARTMENT1	0.25	0
PROT4096	COMPARTMENT1	0.25	0
PROT3454	COMPARTMENT1	0.25	0
PROT101	COMPARTMENT1	1	1
PROT2060	COMPARTMENT1	0.5	0
PROT3699	COMPARTMENT1	0.5	0
PROT3817	COMPARTMENT1	0.25	0
PROT986	COMPARTMENT1	1	0.562646
PROT121	COMPARTMENT1	1	1
PROT106	COMPARTMENT1	1	0.535304
PROT50	COMPARTMENT1	1	1
PROT2115	COMPARTMENT1	0.5	0
PROT3790	COMPARTMENT1	0.25	0
PROT2471	COMPARTMENT1	0.5	0
PROT2126	COMPARTMENT1	0.5	0
PROT2175	COMPARTMENT1	0.5	0
PROT2112	COMPARTMENT1	0.75	1
PROT3893	COMPARTMENT1	0.25	0
PROT2062	COMPARTMENT1	0.5	0.475113
PROT940	COMPARTMENT1	1	1
PROT2320	COMPARTMENT1	0.5	0.499744
PROT2194	COMPARTMENT1	0.5	0
PROT116	COMPARTMENT1	1	0.571887
PROT982	COMPARTMENT1	1	1
PROT3214	COMPARTMENT1	0.25	0
PROT2921	COMPARTMENT1	0.5	0
PROT883	COMPARTMENT1	1	1
PROT113	COMPARTMENT1	1	1
PROT83	COMPARTMENT1	1	1
PROT2608	COMPARTMENT1	0.5	0
PROT1549	COMPARTMENT1	1	0.477402
PROT3705	COMPARTMENT1	0.5	0
PROT3989	COMPARTMENT1	0.25	0
PROT3799	COMPARTMENT1	0.25	0.749859
PROT1245	COMPARTMENT1	1	1
PROT2494	COMPARTMENT1	0.5	0
PROT3476	COMPARTMENT1	0.5	0
PROT2117	COMPARTMENT1	0.5	0
PROT2259	COMPARTMENT1	0.75	1
PROT3904	COMPARTMENT1	0.25	0
PROT3127	COMPARTMENT1	0.25	0
PROT930	COMPARTMENT1	1	0
PROT3949	COMPARTMENT1	0.25	0
PROT3957	COMPARTMENT1	0.5	0
PROT16	COMPARTMENT1	1	0.472852
PROT2053	COMPARTMENT1	0.75	0
PROT2082	COMPARTMENT1	0.75	0
PROT3838	COMPARTMENT1	0.25	0
PROT2225	COMPARTMENT1	0.5	0
PROT2402	COMPARTMENT1	0.25	0
PROT3750	COMPARTMENT1	0.5	0
PROT2151	COMPARTMENT1	0.75	1
PROT3514	COMPARTMENT1	0.5	0
PROT2111	COMPARTMENT1	0.5	1
PROT3917	COMPARTMENT1	0.25	0
PROT1448	COMPARTMENT1	1	1
PROT3083	COMPARTMENT1	0.25	0
PROT114	COMPARTMENT1	1	0.553442
PROT2104	COMPARTMENT1	0.75	0
PROT2783	COMPARTMENT1	0.5	0
PROT3740	COMPARTMENT1	0.5	0
PROT3386	COMPARTMENT1	0.25	0
PROT2896	COMPARTMENT1	0.25	0
PROT4075	COMPARTMENT1	0.25	0
PROT2070	COMPARTMENT1	0.75	0.888184
PROT2177	COMPARTMENT1	0.75	0.440999
PROT2251	COMPARTMENT1	0.5	0.615903
PROT972	COMPARTMENT1	1	1
PROT2906	COMPARTMENT1	0.25	0
PROT3758	COMPARTMENT1	0.25	0
PROT3801	COMPARTMENT1	0.25	0
PROT3715	COMPARTMENT1	0.5	0
PROT2231	COMPARTMENT1	0.5	0
PROT904	COMPARTMENT1	1	1
PROT948	COMPARTMENT1	1	1
PROT2076	COMPARTMENT1	0.5	0
PROT911	COMPARTMENT1	1	1
PROT3213	COMPARTMENT1	0.25	0
PROT27	COMPARTMENT1	1	1
PROT2101	COMPARTMENT1	0.5	0
PROT2168	COMPARTMENT1	0.5	0
PROT2683	COMPARTMENT1	0.25	0
PROT61	COMPARTMENT1	1	1
PROT3749	COMPARTMENT1	0.5	1
PROT3995	COMPARTMENT1	0.25	0
PROT9	COMPARTMENT1	1	0.563073
PROT2207	COMPARTMENT1	0.5	0
PROT117	COMPARTMENT1	1	1
PROT3898	COMPARTMENT1	0.25	0
PROT2705	COMPARTMENT1	0.5	0
PROT3003	COMPARTMENT1	0.5	0.44813
PROT3944	COMPARTMENT1	0.5	0
PROT2334	COMPARTMENT1	0.5	0
PROT33	COMPARTMENT1	1	0.530222
PROT2091	COMPARTMENT1	0.5	0
PROT2242	COMPARTMENT1	0.75	0.657504
PROT3005	COMPARTMENT1	0.25	0
PROT989	COMPARTMENT1	1	0.525757
PROT2245	COMPARTMENT1	0.5	0
PROT3204	COMPARTMENT1	0.5	0
PROT2208	COMPARTMENT1	0.75	0
PROT2654	COMPARTMENT1	0.5	0
PROT3281	COMPARTMENT1	0.25	0
PROT2341	COMPARTMENT1	0.25	0.481872
PROT2375	COMPARTMENT1	0.25	0
PROT3572	COMPARTMENT1	0.5	0
PROT3755	COMPARTMENT1	0.25	0
PROT2106	COMPARTMENT1	0.5	0.551745
PROT2083	COMPARTMENT1	0.5	0.538041
PROT3175	COMPARTMENT1	0.5	0
PROT7	COMPARTMENT1	1	0.511628
PROT2157	COMPARTMENT1	0.75	1
PROT3240	COMPARTMENT1	0.5	0
PROT97	COMPARTMENT1	1	1
PROT3442	COMPARTMENT1	0.25	0
PROT2998	COMPARTMENT1	0.25	0
PROT2090	COMPARTMENT1	0.5	0
PROT2268	COMPARTMENT1	0.5	0
PROT68	COMPARTMENT1	1	1
PROT998	COMPARTMENT1	1	1
PROT94	COMPARTMENT1	1	1
PROT2736	COMPARTMENT1	0.5	0
PROT2687	COMPARTMENT1	0.25	0
PROT2936	COMPARTMENT1	0.25	0
PROT2885	COMPARTMENT1	0.25	0
PROT3172	COMPARTMENT1	0.5	0
PROT2154	COMPARTMENT1	0.75	0
PROT2266	COMPARTMENT1	0.5	0
PROT3345	COMPARTMENT1	0.5	0
PROT3765	COMPARTMENT1	0.25	0
PROT2422	COMPARTMENT1	0.25	0.438564
PROT3738	COMPARTMENT1	0.5	0.71262
PROT119	COMPARTMENT1	1	0.514342
PROT2131	COMPARTMENT1	0.5	0
PROT3820	COMPARTMENT1	0.25	0
PROT2144	COMPARTMENT1	0.5	0
PROT1000	COMPARTMENT1	1	0
PROT969	COMPARTMENT1	1	0.547371
PROT3742	COMPARTMENT1	0.5	0
PROT3321	COMPARTMENT1	0.25	0
PROT2138	COMPARTMENT1	0.5	0
PROT2338	COMPARTMENT1	0.5	0
PROT3416	COMPARTMENT1	0.5	0
PROT2989	COMPARTMENT1	0.5	0
PROT2110	COMPARTMENT1	0.75	0.561205
PROT2942	COMPARTMENT1	0.5	0
PROT3037	COMPARTMENT1	0.5	0
PROT4058	COMPARTMENT1	0.25	0
PROT52	COMPARTMENT1	1	0.523532
PROT2054	COMPARTMENT1	0.5	0
PROT3041	COMPARTMENT1	0.25	0
PROT3639	COMPARTMENT1	0.25	0
PROT3940	COMPARTMENT1	0.25	0
PROT2908	COMPARTMENT1	0.5	0
PROT2874	COMPARTMENT1	0.25	0
PROT92	COMPARTMENT1	1	1
PROT889	COMPARTMENT1	1	1
PROT2100	COMPARTMENT1	0.5	0
PROT2871	COMPARTMENT1	0.25	0
PROT2147	COMPARTMENT1	0.75	0.78543
PROT993	COMPARTMENT1	1	1
PROT51	COMPARTMENT1	1	1
PROT3760	COMPARTMENT1	0.25	0
PROT967	COMPARTMENT1	1	1
PROT2189	COMPARTMENT1	0.5	0
PROT4101	COMPARTMENT1	0.25	0
PROT3842	COMPARTMENT1	0.25	0
PROT4025	COMPARTMENT1	0.25	0
PROT2560	COMPARTMENT1	0.5	0
PROT2679	COMPARTMENT1	0.5	0
PROT2727	COMPARTMENT1	0.25	0
PROT46	COMPARTMENT1	1	1
PROT1643	COMPARTMENT1	1	1
PROT3847	COMPARTMENT1	0.25	0
PROT2182	COMPARTMENT1	0.75	0
PROT2120	COMPARTMENT1	0.5	0
PROT2123	COMPARTMENT1	0.75	0.897944
PROT3894	COMPARTMENT1	0.25	0
PROT2720	COMPARTMENT1	0.5	0
PROT2387	COMPARTMENT1	0.5	0.457632
PROT3382	COMPARTMENT1	0.25	0
PROT2058	COMPARTMENT1	0.5	0
PROT3713	COMPARTMENT1	0.5	0
PROT2135	COMPARTMENT1	0.75	0
PROT2283	COMPARTMENT1	0.25	0.499156
PROT1	COMPARTMENT1	1	1
PROT2073	COMPARTMENT1	0.5	0
PROT988	COMPARTMENT1	1	1
PROT2941	COMPARTMENT1	0.5	0
PROT84	COMPARTMENT1	1	1
PROT85	COMPARTMENT1	1	0.550267
PROT3813	COMPARTMENT1	0.25	0
PROT2097	COMPARTMENT1	0.75	0.562638
PROT75	COMPARTMENT1	1	0.534179
PROT2250	COMPARTMENT1	0.75	1
PROT897	COMPARTMENT1	1	1
PROT2109	COMPARTMENT1	0.5	0
PROT3341	COMPARTMENT1	0.25	0
PROT2	COMPARTMENT1	1	1
PROT2665	COMPARTMENT1	0.25	0
PROT2249	COMPARTMENT1	0.5	0
PROT2221	COMPARTMENT1	0.75	0.671462
PROT3693	COMPARTMENT1	0.5	0
PROT3906	COMPARTMENT1	0.25	0
PROT2220	COMPARTMENT1	0.5	0
PROT37	COMPARTMENT1	1	0.436316
PROT4133	COMPARTMENT1	0.25	0
PROT3496	COMPARTMENT1	0.25	0
PROT2052	COMPARTMENT1	0.5	0
PROT2656	COMPARTMENT1	0.5	0
PROT3501	COMPARTMENT1	0.5	0
PROT2234	COMPARTMENT1	0.5	0.604861
PROT980	COMPARTMENT1	1	1
PROT3644	COMPARTMENT1	0.25	0
PROT2193	COMPARTMENT1	0.75	0
PROT3886	COMPARTMENT1	0.25	0
PROT56	COMPARTMENT1	1	0.492129
PROT3787	COMPARTMENT1	0.25	0
PROT3271	COMPARTMENT1	0.5	0
PROT3270	COMPARTMENT1	0.5	0
PROT2074	COMPARTMENT1	0.5	0
PROT2456	COMPARTMENT1	0.25	0
PROT2050	COMPARTMENT1	0.5	0.462108
PROT938	COMPARTMENT1	1	0.528187
PROT3177	COMPARTMENT1	0.5	0.622499
PROT954	COMPARTMENT1	1	1
PROT2960	COMPARTMENT1	0.25	0
PROT39	COMPARTMENT1	1	0.578698
PROT2827	COMPARTMENT1	0.5	0
PROT3712	COMPARTMENT1	0.5	0
PROT102	COMPARTMENT1	1	1
PROT974	COMPARTMENT1	1	0.484412
PROT941	COMPARTMENT1	1	1
PROT98	COMPARTMENT1	1	0.793693
PROT990	COMPARTMENT1	1	1
PROT3690	COMPARTMENT1	0.25	0
PROT34	COMPARTMENT1	1	1
PROT932	COMPARTMENT1	1	0.574258
PROT3744	COMPARTMENT1	0.5	0
PROT2200	COMPARTMENT1	0.75	1
PROT2576	COMPARTMENT1	0.25	0
PROT2103	COMPARTMENT1	0.5	0.506865
PROT8	COMPARTMENT1	1	1
PROT41	COMPARTMENT1	1	0.46236
PROT2406	COMPARTMENT1	0.5	0.542623
PROT2932	COMPARTMENT1	0.5	0
PROT3070	COMPARTMENT1	0.5	0
PROT2143	COMPARTMENT1	0.75	1
PROT2516	COMPARTMENT1	0.5	0
PROT3426	COMPARTMENT1	0.25	0
PROT2786	COMPARTMENT1	0.25	0
PROT2192	COMPARTMENT1	0.75	0.869227
PROT3921	COMPARTMENT1	0.25	0
PROT3856	COMPARTMENT1	0.25	0
PROT2870	COMPARTMENT1	0.25	0
PROT3340	COMPARTMENT1	0.25	0
PROT18	COMPARTMENT1	1	1
PROT3695	COMPARTMENT1	0.5	0
PROT47	COMPARTMENT1	1	1
PROT2059	COMPARTMENT1	0.75	0.498341
PROT2441	COMPARTMENT1	0.5	0.485844
PROT2261	COMPARTMENT1	0.75	1
PROT927	COMPARTMENT1	1	1
PROT2236	COMPARTMENT1	0.75	0.539228
PROT2670	COMPARTMENT1	0.25	0
PROT2224	COMPARTMENT1	0.5	0
PROT29	COMPARTMENT1	1	0.525443
PROT2166	COMPARTMENT1	0.5	0
PROT3	COMPARTMENT1	1	1
PROT934	COMPARTMENT1	1	1
PROT3806	COMPARTMENT1	0.25	0
PROT898	COMPARTMENT1	1	1
PROT915	COMPARTMENT1	1	0.480511
PROT956	COMPARTMENT1	1	1
PROT3716	COMPARTMENT1	0.5	0
PROT3323	COMPARTMENT1	0.5	0
PROT2418	COMPARTMENT1	0.5	0.56282
PROT2734	COMPARTMENT1	0.25	0
PROT28	COMPARTMENT1	1	0.490461
PROT2043	COMPARTMENT1	0.75	0.566514
PROT3841	COMPARTMENT1	0.25	0
PROT4094	COMPARTMENT1	0.25	0
PROT2180	COMPARTMENT1	0.75	1
PROT2092	COMPARTMENT1	0.75	1
PROT3734	COMPARTMENT1	0.5	0
PROT2534	COMPARTMENT1	0.25	0
PROT4099	COMPARTMENT1	0.25	0
PROT949	COMPARTMENT1	1	1
PROT894	COMPARTMENT1	1	1
PROT2139	COMPARTMENT1	0.5	0
PROT3992	COMPARTMENT1	0.25	0
PROT4114	COMPARTMENT1	0.25	0
PROT3490	COMPARTMENT1	0.25	0
PROT3846	COMPARTMENT1	0.25	0
PROT3999	COMPARTMENT1	0.25	0
PROT2174	COMPARTMENT1	0.75	0
PROT2630	COMPARTMENT1	0.25	0
PROT3085	COMPARTMENT1	0.5	0.469659
PROT82	COMPARTMENT1	1	1
PROT2102	COMPARTMENT1	0.5	0.570813
PROT4046	COMPARTMENT1	0.25	0
PROT2257	COMPARTMENT1	0.5	0.456889
PROT4009	COMPARTMENT1	0.25	0
PROT2888	COMPARTMENT1	0.5	0
PROT59	COMPARTMENT1	1	1
PROT3421	COMPARTMENT1	0.5	0
PROT3707	COMPARTMENT1	0.5	0
PROT3910	COMPARTMENT1	0.25	0
PROT3727	COMPARTMENT1	0.5	0
PROT2521	COMPARTMENT1	0.25	0
PROT2767	COMPARTMENT1	0.5	0
PROT3478	COMPARTMENT1	0.75	1
PROT964	COMPARTMENT1	1	1
PROT2438	COMPARTMENT1	0.5	1
PROT1251	COMPARTMENT1	1	1
PROT3365	COMPARTMENT1	0.5	0
PROT3697	COMPARTMENT1	0.25	0
PROT2570	COMPARTMENT1	0.25	0
PROT3542	COMPARTMENT2	0.25	0
PROT181	COMPARTMENT2	1	0.739192
PROT3403	COMPARTMENT2	0.5	0
PROT3203	COMPARTMENT2	0.5	0
PROT2258	COMPARTMENT2	0.25	0
PROT144	COMPARTMENT2	1	0.742878
PROT133	COMPARTMENT2	1	0.521717
PROT2370	COMPARTMENT2	0.5	0
PROT1120	COMPARTMENT2	1	1
PROT3208	COMPARTMENT2	0.5	0
PROT2485	COMPARTMENT2	0.25	0
PROT1094	COMPARTMENT2	1	0.524927
PROT3550	COMPARTMENT2	0.5	0
PROT123	COMPARTMENT2	1	0.5208
PROT3551	COMPARTMENT2	0.5	0
PROT2015	COMPARTMENT2	1	0.803901
PROT1015	COMPARTMENT2	1	0.730758
PROT1007	COMPARTMENT2	1	0.77221
PROT1003	COMPARTMENT2	1	0.754288
PROT2307	COMPARTMENT2	0.75	0.748912
PROT184	COMPARTMENT2	1	0.664812
PROT129	COMPARTMENT2	1	1
PROT3397	COMPARTMENT2	0.5	0
PROT2297	COMPARTMENT2	0.5	0
PROT2955	COMPARTMENT2	0.5	0
PROT2325	COMPARTMENT2	0.75	0.47585
PROT2900	COMPARTMENT2	0.25	0
PROT2401	COMPARTMENT2	0.75	0.660156
PROT1131	COMPARTMENT2	1	0.543283
PROT3819	COMPARTMENT2	0.25	0
PROT2562	COMPARTMENT2	0.25	0
PROT2604	COMPARTMENT2	0.5	0
PROT3792	COMPARTMENT2	0.5	0
PROT3785	COMPARTMENT2	0.5	0
PROT4056	COMPARTMENT2	0.25	0
PROT3221	COMPARTMENT2	0.5	0
PROT3729	COMPARTMENT2	0.25	0
PROT1082	COMPARTMENT2	1	0.5563
PROT1057	COMPARTMENT2	1	0.445275
PROT2369	COMPARTMENT2	0.5	0
PROT3585	COMPARTMENT2	0.25	0
PROT3759	COMPARTMENT2	0.5	0
PROT3688	COMPARTMENT2	0.25	0
PROT2372	COMPARTMENT2	0.5	0.530962
PROT1091	COMPARTMENT2	1	0.81776
PROT2483	COMPARTMENT2	0.25	0
PROT1020	COMPARTMENT2	1	0.456822
PROT1761	COMPARTMENT2	1	0.791013
PROT2716	COMPARTMENT2	0.25	0
PROT3700	COMPARTMENT2	0.25	0
PROT3400	COMPARTMENT2	0.5	0
PROT4010	COMPARTMENT2	0.25	0
PROT1008	COMPARTMENT2	1	1
PROT3120	COMPARTMENT2	0.5	0
PROT1054	COMPARTMENT2	1	0.561878
PROT3024	COMPARTMENT2	0.5	0
PROT155	COMPARTMENT2	1	0.530648
PROT3293	COMPARTMENT2	0.5	0
PROT3777	COMPARTMENT2	0.5	0
PROT2302	COMPARTMENT2	0.75	0
PROT191	COMPARTMENT2	1	0.446797
PROT167	COMPARTMENT2	1	0.661962
PROT3512	COMPARTMENT2	0.25	0
PROT2286	COMPARTMENT2	0.75	0
PROT3796	COMPARTMENT2	0.5	0
PROT3770	COMPARTMENT2	0.5	0
PROT1063	COMPARTMENT2	1	0
PROT3902	COMPARTMENT2	0.25	0
PROT1043	COMPARTMENT2	1	0
PROT1092	COMPARTMENT2	1	0.51703
PROT2336	COMPARTMENT2	0.5	0
PROT4019	COMPARTMENT2	0.25	0
PROT2961	COMPARTMENT2	0.5	0
PROT153	COMPARTMENT2	1	0.499875
PROT3058	COMPARTMENT2	0.5	0
PROT2436	COMPARTMENT2	0.75	0
PROT3988	COMPARTMENT2	0.25	0
PROT1113	COMPARTMENT2	1	0.799069
PROT3297	COMPARTMENT2	0.5	0
PROT2554	COMPARTMENT2	0.5	0
PROT3766	COMPARTMENT2	0.5	0
PROT3853	COMPARTMENT2	0.25	0
PROT138	COMPARTMENT2	1	1
PROT3775	COMPARTMENT2	0.5	0
PROT2432	COMPARTMENT2	0.75	0
PROT3701	COMPARTMENT2	0.25	0
PROT2291	COMPARTMENT2	0.75	0.483629
PROT2086	COMPARTMENT2	0.5	0.472289
PROT3587	COMPARTMENT2	0.5	0.592862
PROT1080	COMPARTMENT2	1	0.612983
PROT3776	COMPARTMENT2	0.5	0
PROT2373	COMPARTMENT2	0.5	0
PROT3595	COMPARTMENT2	0.25	0
PROT2367	COMPARTMENT2	0.5	0
PROT142	COMPARTMENT2	1	0.531729
PROT1021	COMPARTMENT2	1	0
PROT3970	COMPARTMENT2	0.25	0
PROT2433	COMPARTMENT2	0.75	0
PROT3833	COMPARTMENT2	0.25	0
PROT3027	COMPARTMENT2	0.5	0
PROT3823	COMPARTMENT2	0.25	0
PROT1124	COMPARTMENT2	1	0.489212
PROT2408	COMPARTMENT2	0.5	0
PROT3862	COMPARTMENT2	0.25	0
PROT3978	COMPARTMENT2	0.25	0
PROT163	COMPARTMENT2	1	0.586672
PROT3603	COMPARTMENT2	0.25	0
PROT2337	COMPARTMENT2	0.5	0
PROT2398	COMPARTMENT2	0.75	0
PROT3812	COMPARTMENT2	0.5	0
PROT1774	COMPARTMENT2	1	1
PROT1101	COMPARTMENT2	1	0.825508
PROT2765	COMPARTMENT2	0.5	0.565643
PROT3229	COMPARTMENT2	0.5	0.49867
PROT3130	COMPARTMENT2	0.5	0
PROT2342	COMPARTMENT2	0.75	0
PROT3768	COMPARTMENT2	0.5	0
PROT2416	COMPARTMENT2	0.5	0
PROT1081	COMPARTMENT2	1	0.739664
PROT2322	COMPARTMENT2	0.75	0
PROT3791	COMPARTMENT2	0.5	0.674116
PROT3687	COMPARTMENT2	0.25	0
PROT1039	COMPARTMENT2	1	0.785761
PROT3710	COMPARTMENT2	0.5	0.7591
PROT2323	COMPARTMENT2	0.5	0
PROT2357	COMPARTMENT2	0.75	0
PROT2817	COMPARTMENT2	0.75	0
PROT126	COMPARTMENT2	1	0.833266
PROT2774	COMPARTMENT2	0.25	0
PROT2329	COMPARTMENT2	0.5	0
PROT2380	COMPARTMENT2	0.75	0.526061
PROT916	COMPARTMENT2	1	1
PROT1290	COMPARTMENT2	1	0.777238
PROT3465	COMPARTMENT2	0.25	0
PROT3525	COMPARTMENT2	0.25	0
PROT2308	COMPARTMENT2	0.5	0
PROT1836	COMPARTMENT2	1	0.523438
PROT1126	COMPARTMENT2	1	0.787119
PROT2349	COMPARTMENT2	0.5	0.48065
PROT2353	COMPARTMENT2	0.75	0.634556
PROT3327	COMPARTMENT2	0.25	0
PROT1075	COMPARTMENT2	1	0.755463
PROT3816	COMPARTMENT2	0.5	0
PROT2445	COMPARTMENT2	0.5	0
PROT3918	COMPARTMENT2	0.25	0
PROT1047	COMPARTMENT2	1	1
PROT2290	COMPARTMENT2	0.75	0
PROT188	COMPARTMENT2	1	0.770657
PROT3751	COMPARTMENT2	0.5	0
PROT2256	COMPARTMENT2	0.5	0.515541
PROT130	COMPARTMENT2	1	0.547416
PROT1067	COMPARTMENT2	1	1
PROT2067	COMPARTMENT2	0.25	0.448657
PROT4045	COMPARTMENT2	0.25	0
PROT3593	COMPARTMENT2	0.75	0
PROT3746	COMPARTMENT2	0.25	0
PROT3718	COMPARTMENT2	0.25	0
PROT1006	COMPARTMENT2	1	0.557344
PROT2785	COMPARTMENT2	0.5	0
PROT2371	COMPARTMENT2	0.5	0
PROT1019	COMPARTMENT2	1	0
PROT2344	COMPARTMENT2	0.5	0
PROT148	COMPARTMENT2	1	0.551922
PROT3781	COMPARTMENT2	0.5	0
PROT3761	COMPARTMENT2	0.5	0
PROT3596	COMPARTMENT2	0.5	0
PROT140	COMPARTMENT2	1	1
PROT1104	COMPARTMENT2	1	0.529879
PROT2018	COMPARTMENT2	1	0
PROT1046	COMPARTMENT2	1	1
PROT3226	COMPARTMENT2	0.25	0
PROT183	COMPARTMENT2	1	0.562313
PROT1097	COMPARTMENT2	1	0.684601
PROT2919	COMPARTMENT2	0.25	0
PROT2352	COMPARTMENT2	0.75	1
PROT2284	COMPARTMENT2	0.5	0
PROT135	COMPARTMENT2	1	0.583447
PROT4130	COMPARTMENT2	0.25	0
PROT3884	COMPARTMENT2	0.25	0
PROT3822	COMPARTMENT2	0.25	0.489817
PROT2296	COMPARTMENT2	0.5	0
PROT1016	COMPARTMENT2	1	0.511393
PROT156	COMPARTMENT2	1	0.548101
PROT1042	COMPARTMENT2	1	0.496022
PROT3969	COMPARTMENT2	0.25	0
PROT1050	COMPARTMENT2	1	0.538236
PROT137	COMPARTMENT2	1	0.467195
PROT2386	COMPARTMENT2	0.5	0.436841
PROT3369	COMPARTMENT2	0.5	0
PROT2305	COMPARTMENT2	0.75	0
PROT1086	COMPARTMENT2	1	0.577854
PROT1045	COMPARTMENT2	1	0.532806
PROT3756	COMPARTMENT2	0.5	0
PROT1108	COMPARTMENT2	1	0.453997
PROT1999	COMPARTMENT2	1	0.544609
PROT3810	COMPARTMENT2	0.5	0
PROT2089	COMPARTMENT2	0.5	0.522059
PROT4027	COMPARTMENT2	0.5	0
PROT2556	COMPARTMENT2	0.5	0
PROT1218	COMPARTMENT2	1	0.547263
PROT2333	COMPARTMENT2	0.75	0
PROT2405	COMPARTMENT2	0.75	0
PROT3062	COMPARTMENT2	0.5	0
PROT1009	COMPARTMENT2	1	0.715884
PROT2523	COMPARTMENT2	0.5	0
PROT2277	COMPARTMENT2	0.75	0.584016
PROT2205	COMPARTMENT2	0.25	0
PROT2348	COMPARTMENT2	0.5	0
PROT3793	COMPARTMENT2	0.5	0
PROT1115	COMPARTMENT2	1	1
PROT1055	COMPARTMENT2	1	1
PROT3087	COMPARTMENT2	0.5	0
PROT194	COMPARTMENT2	1	0.444086
PROT2442	COMPARTMENT2	0.5	0
PROT3098	COMPARTMENT2	0.25	0
PROT1111	COMPARTMENT2	1	0.51517
PROT162	COMPARTMENT2	1	1
PROT2898	COMPARTMENT2	0.25	0
PROT2451	COMPARTMENT2	0.5	0
PROT3234	COMPARTMENT2	0.5	0
PROT2400	COMPARTMENT2	0.75	0
PROT2219	COMPARTMENT2	0.5	0.488941
PROT187	COMPARTMENT2	1	0.450824
PROT1342	COMPARTMENT2	1	1
PROT1018	COMPARTMENT2	1	0.49493
PROT1072	COMPARTMENT2	1	1
PROT2994	COMPARTMENT2	0.25	0
PROT3840	COMPARTMENT2	0.25	0
PROT2282	COMPARTMENT2	0.5	0
PROT2391	COMPARTMENT2	0.75	0.44337
PROT3467	COMPARTMENT2	0.25	0
PROT3914	COMPARTMENT2	0.25	0
PROT2351	COMPARTMENT2	0.75	0.576057
PROT1041	COMPARTMENT2	1	1
PROT3538	COMPARTMENT2	0.5	0
PROT1122	COMPARTMENT2	1	0.534567
PROT2362	COMPARTMENT2	0.75	0.657917
PROT3769	COMPARTMENT2	0.5	0
PROT3861	COMPARTMENT2	0.25	0
PROT4048	COMPARTMENT2	0.25	0
PROT3783	COMPARTMENT2	0.5	0.744206
PROT2361	COMPARTMENT2	0.5	0
PROT3757	COMPARTMENT2	0.5	0
PROT182	COMPARTMENT2	1	0.510138
PROT924	COMPARTMENT2	1	0.638156
PROT1048	COMPARTMENT2	1	1
PROT2390	COMPARTMENT2	0.75	0
PROT3721	COMPARTMENT2	0.25	0
PROT152	COMPARTMENT2	1	1
PROT2041	COMPARTMENT2	0.25	0
PROT2968	COMPARTMENT2	0.5	0
PROT3782	COMPARTMENT2	0.5	0
PROT3242	COMPARTMENT2	0.5	0
PROT2393	COMPARTMENT2	0.75	0.49527
PROT2300	COMPARTMENT2	0.5	0
PROT168	COMPARTMENT2	1	0.775778
PROT4006	COMPARTMENT2	0.25	0
PROT2313	COMPARTMENT2	0.5	0
PROT3947	COMPARTMENT2	0.25	0
PROT169	COMPARTMENT2	1	0.829668
PROT3864	COMPARTMENT2	0.25	0
PROT3704	COMPARTMENT2	0.25	0
PROT3961	COMPARTMENT2	0.25	0
PROT3029	COMPARTMENT2	0.5	0
PROT3723	COMPARTMENT2	0.25	0
PROT2450	COMPARTMENT2	0.5	0
PROT3107	COMPARTMENT2	0.5	0
PROT3642	COMPARTMENT2	0.5	0
PROT1070	COMPARTMENT2	1	0.542883
PROT2412	COMPARTMENT2	0.5	0
PROT2507	COMPARTMENT2	0.25	0
PROT180	COMPARTMENT2	1	0.550779
PROT2098	COMPARTMENT2	0.25	0
PROT3767	COMPARTMENT2	0.5	0
PROT2095	COMPARTMENT2	0.5	0.446751
PROT160	COMPARTMENT2	1	0.498651
PROT2298	COMPARTMENT2	0.75	0
PROT3773	COMPARTMENT2	0.5	0
PROT2355	COMPARTMENT2	0.75	0.592596
PROT3972	COMPARTMENT2	0.25	0
PROT3171	COMPARTMENT2	0.5	0
PROT3634	COMPARTMENT2	0.5	0
PROT3965	COMPARTMENT2	0.25	0
PROT141	COMPARTMENT2	1	1
PROT3829	COMPARTMENT2	0.5	0
PROT1060	COMPARTMENT2	1	0.813863
PROT2358	COMPARTMENT2	0.5	0.554248
PROT1061	COMPARTMENT2	1	1
PROT2448	COMPARTMENT2	0.5	0
PROT2784	COMPARTMENT2	0.5	0
PROT139	COMPARTMENT2	1	0.760237
PROT3945	COMPARTMENT2	0.25	0
PROT2711	COMPARTMENT2	0.5	0
PROT2430	COMPARTMENT2	0.75	0
PROT3457	COMPARTMENT2	0.5	0
PROT2306	COMPARTMENT2	0.75	0.565094
PROT2489	COMPARTMENT2	0.5	0
PROT2332	COMPARTMENT2	0.5	0
PROT2345	COMPARTMENT2	0.5	0
PROT1121	COMPARTMENT2	1	0.527694
PROT192	COMPARTMENT2	1	1
PROT2990	COMPARTMENT2	0.25	0
PROT2229	COMPARTMENT2	0.5	0.477017
PROT189	COMPARTMENT2	1	0.471319
PROT3287	COMPARTMENT2	0.5	0
PROT1030	COMPARTMENT2	1	0.482025
PROT1024	COMPARTMENT2	1	0
PROT3441	COMPARTMENT2	0.25	0
PROT2319	COMPARTMENT2	0.75	0
PROT2084	COMPARTMENT2	0.5	0
PROT1140	COMPARTMENT2	1	1
PROT2335	COMPARTMENT2	0.75	0
PROT1066	COMPARTMENT2	1	0.478294
PROT2622	COMPARTMENT2	0.25	0
PROT2318	COMPARTMENT2	0.5	0
PROT3802	COMPARTMENT2	0.5	0
PROT2165	COMPARTMENT2	0.25	0.499871
PROT2409	COMPARTMENT2	0.75	1
PROT3804	COMPARTMENT2	0.5	0
PROT1025	COMPARTMENT2	1	0.515057
PROT3703	COMPARTMENT2	0.25	1
PROT2381	COMPARTMENT2	0.75	0
PROT1105	COMPARTMENT2	1	0
PROT2810	COMPARTMENT2	0.25	0
PROT1034	COMPARTMENT2	1	0
PROT1052	COMPARTMENT2	1	1
PROT2326	COMPARTMENT2	0.5	0
PROT2389	COMPARTMENT2	0.75	0
PROT1117	COMPARTMENT2	1	0.821422
PROT2404	COMPARTMENT2	0.5	0
PROT2294	COMPARTMENT2	0.75	0.647328
PROT3617	COMPARTMENT2	0.25	0
PROT128	COMPARTMENT2	1	0.454318
PROT2648	COMPARTMENT2	0.25	0
PROT2173	COMPARTMENT2	0.25	0
PROT1069	COMPARTMENT2	1	0.694978
PROT2223	COMPARTMENT2	0.5	0
PROT2324	COMPARTMENT2	0.5	0
PROT3885	COMPARTMENT2	0.25	0
PROT2414	COMPARTMENT2	0.75	0.518673
PROT3954	COMPARTMENT2	0.25	0
PROT147	COMPARTMENT2	1	0.740599
PROT2417	COMPARTMENT2	0.75	0.715547
PROT3942	COMPARTMENT2	0.25	0
PROT1029	COMPARTMENT2	1	0.431555
PROT178	COMPARTMENT2	1	1
PROT2544	COMPARTMENT2	0.25	0
PROT2214	COMPARTMENT2	0.25	0.441839
PROT2239	COMPARTMENT2	0.25	0
PROT3187	COMPARTMENT2	0.25	0
PROT3331	COMPARTMENT2	0.5	0
PROT2388	COMPARTMENT2	0.75	0
PROT2539	COMPARTMENT2	0.25	0
PROT1071	COMPARTMENT2	1	0.707338
PROT1005	COMPARTMENT2	1	1
PROT3973	COMPARTMENT2	0.25	0
PROT3714	COMPARTMENT2	0.25	1
PROT2317	COMPARTMENT2	0.5	0
PROT1004	COMPARTMENT2	1	0.794481
PROT175	COMPARTMENT2	1	1
PROT3807	COMPARTMENT2	0.5	0
PROT2759	COMPARTMENT2	0.25	0
PROT3798	COMPARTMENT2	0.25	0
PROT2775	COMPARTMENT2	0.5	0
PROT2354	COMPARTMENT2	0.5	0
PROT146	COMPARTMENT2	1	0.528279
PROT2281	COMPARTMENT2	0.75	0.729896
PROT3222	COMPARTMENT2	0.25	0
PROT2675	COMPARTMENT2	0.25	0
PROT185	COMPARTMENT2	1	0.442729
PROT3282	COMPARTMENT2	0.25	0
PROT1083	COMPARTMENT2	1	0.711952
PROT2314	COMPARTMENT2	0.75	0.480909
PROT3138	COMPARTMENT2	0.25	0
PROT190	COMPARTMENT2	1	0.73165
PROT1011	COMPARTMENT2	1	0
PROT2953	COMPARTMENT2	0.5	0
PROT1127	COMPARTMENT2	1	1
PROT1095	COMPARTMENT2	1	0.539361
PROT3922	COMPARTMENT2	0.25	0
PROT2572	COMPARTMENT2	0.5	0
PROT3982	COMPARTMENT2	0.25	0
PROT3547	COMPARTMENT2	0.25	0
PROT3753	COMPARTMENT2	0.5	0
PROT3764	COMPARTMENT2	0.5	0.723232
PROT3247	COMPARTMENT2	0.25	0
PROT3920	COMPARTMENT2	0.25	0
PROT2984	COMPARTMENT2	0.25	0
PROT2304	COMPARTMENT2	0.5	0
PROT2862	COMPARTMENT2	0.5	0
PROT4115	COMPARTMENT2	0.25	0
PROT4078	COMPARTMENT2	0.25	0
PROT2136	COMPARTMENT2	0.5	0.477562
PROT958	COMPARTMENT2	1	0.798914
PROT2384	COMPARTMENT2	0.5	0
PROT1014	COMPARTMENT2	1	0
PROT4126	COMPARTMENT2	0.25	0
PROT3835	COMPARTMENT2	0.25	0
PROT4047	COMPARTMENT2	0.25	0
PROT3163	COMPARTMENT2	0.5	0
PROT2078	COMPARTMENT2	0.5	0.474799
PROT1731	COMPARTMENT2	1	0
PROT1053	COMPARTMENT2	1	1
PROT3878	COMPARTMENT2	0.25	0
PROT2831	COMPARTMENT2	0.75	0
PROT3925	COMPARTMENT2	0.25	0
PROT3629	COMPARTMENT2	0.25	0
PROT1125	COMPARTMENT2	1	0.449158
PROT2447	COMPARTMENT2	0.5	0
PROT2403	COMPARTMENT2	0.5	0
PROT2293	COMPARTMENT2	0.5	0
PROT3691	COMPARTMENT2	0.25	0
PROT1010	COMPARTMENT2	1	0.790863
PROT2158	COMPARTMENT2	0.5	0.487478
PROT3632	COMPARTMENT2	0.5	0
PROT1065	COMPARTMENT2	1	1
PROT1012	COMPARTMENT2	1	0.491525
PROT172	COMPARTMENT2	1	0.52854
PROT1084	COMPARTMENT2	1	0.486083
PROT2852	COMPARTMENT2	0.5	0
PROT1109	COMPARTMENT2	1	0
PROT2230	COMPARTMENT2	0.25	0
PROT3845	COMPARTMENT2	0.5	0
PROT2327	COMPARTMENT2	0.75	0
PROT3711	COMPARTMENT2	0.25	0.785897
PROT151	COMPARTMENT2	1	0.792386
PROT1112	COMPARTMENT2	1	0.748969
PROT3743	COMPARTMENT2	0.25	0.60705
PROT1077	COMPARTMENT2	1	0.568106
PROT171	COMPARTMENT2	1	0
PROT2732	COMPARTMENT2	0.25	0
PROT2821	COMPARTMENT2	0.5	0
PROT3883	COMPARTMENT2	0.25	0
PROT3789	COMPARTMENT2	0.5	0
PROT2310	COMPARTMENT2	0.5	0
PROT166	COMPARTMENT2	1	0.52746
PROT2072	COMPARTMENT2	0.25	0
PROT1078	COMPARTMENT2	1	0.447794
PROT2795	COMPARTMENT2	0.75	0
PROT2359	COMPARTMENT2	0.75	0
PROT2867	COMPARTMENT2	0.25	0
PROT2383	COMPARTMENT2	0.5	0
PROT1875	COMPARTMENT2	1	0.509305
PROT2048	COMPARTMENT2	0.5	0.522548
PROT1051	COMPARTMENT2	1	0.597448
PROT1838	COMPARTMENT2	1	0
PROT3808	COMPARTMENT2	0.5	0
PROT3771	COMPARTMENT2	0.5	0
PROT3278	COMPARTMENT2	0.25	0
PROT2119	COMPARTMENT2	0.25	0
PROT2444	COMPARTMENT2	0.75	0.784387
PROT3670	COMPARTMENT2	0.25	0
PROT3955	COMPARTMENT2	0.25	0
PROT3668	COMPARTMENT2	0.25	0
PROT2419	COMPARTMENT2	0.75	0
PROT136	COMPARTMENT2	1	1
PROT3021	COMPARTMENT2	0.5	0
PROT4128	COMPARTMENT2	0.25	0
PROT2420	COMPARTMENT2	0.75	0.596561
PROT2413	COMPARTMENT2	0.75	0
PROT3827	COMPARTMENT2	0.25	0
PROT3592	COMPARTMENT2	0.25	0
PROT2415	COMPARTMENT2	0.75	0
PROT4057	COMPARTMENT2	0.25	0
PROT2993	COMPARTMENT2	0.75	0.458394
PROT2366	COMPARTMENT2	0.75	0
PROT2278	COMPARTMENT2	0.75	0
PROT3930	COMPARTMENT2	0.25	0
PROT3843	COMPARTMENT2	0.25	0
PROT3817	COMPARTMENT2	0.5	0.522182
PROT2394	COMPARTMENT2	0.5	0
PROT3790	COMPARTMENT2	0.5	0.86306
PROT2062	COMPARTMENT2	0.5	0.524887
PROT2347	COMPARTMENT2	0.25	0
PROT2320	COMPARTMENT2	0.5	0.500256
PROT157	COMPARTMENT2	1	0.51585
PROT2952	COMPARTMENT2	0.5	0
PROT3631	COMPARTMENT2	0.5	0
PROT4050	COMPARTMENT2	0.25	0
PROT3874	COMPARTMENT2	0.25	0
PROT1022	COMPARTMENT2	1	0.452258
PROT3417	COMPARTMENT2	0.25	0
PROT3136	COMPARTMENT2	0.5	0
PROT127	COMPARTMENT2	1	0.765332
PROT3705	COMPARTMENT2	0.25	1
PROT3799	COMPARTMENT2	0.5	0
PROT3931	COMPARTMENT2	0.25	0
PROT2985	COMPARTMENT2	0.25	0
PROT1119	COMPARTMENT2	1	0.545244
PROT3125	COMPARTMENT2	0.25	0
PROT2431	COMPARTMENT2	0.75	0.749695
PROT1103	COMPARTMENT2	1	0.54602
PROT2145	COMPARTMENT2	0.5	0
PROT3786	COMPARTMENT2	0.5	0
PROT1090	COMPARTMENT2	1	0.489356
PROT3528	COMPARTMENT2	0.25	0
PROT3389	COMPARTMENT2	0.25	0
PROT3949	COMPARTMENT2	0.25	0
PROT3754	COMPARTMENT2	0.5	0.779637
PROT2346	COMPARTMENT2	0.5	0
PROT2706	COMPARTMENT2	0.5	0
PROT3484	COMPARTMENT2	0.5	0
PROT3483	COMPARTMENT2	0.25	0
PROT2368	COMPARTMENT2	0.75	0
PROT2402	COMPARTMENT2	0.75	1
PROT4124	COMPARTMENT2	0.25	0
PROT1699	COMPARTMENT2	1	0.819634
PROT131	COMPARTMENT2	1	0.809218
PROT2435	COMPARTMENT2	0.5	0
PROT2111	COMPARTMENT2	0.5	0
PROT1128	COMPARTMENT2	1	0
PROT186	COMPARTMENT2	1	0.505797
PROT4024	COMPARTMENT2	0.25	0
PROT125	COMPARTMENT2	1	0.556674
PROT3168	COMPARTMENT2	0.5	0
PROT3780	COMPARTMENT2	0.5	0
PROT173	COMPARTMENT2	1	1
PROT3371	COMPARTMENT2	0.25	0
PROT161	COMPARTMENT2	1	0.458843
PROT3151	COMPARTMENT2	0.5	0
PROT1013	COMPARTMENT2	1	0.448681
PROT2853	COMPARTMENT2	0.5	0
PROT3758	COMPARTMENT2	0.5	0.784265
PROT3801	COMPARTMENT2	0.5	0
PROT3950	COMPARTMENT2	0.25	0
PROT2363	COMPARTMENT2	0.75	0.713641
PROT2893	COMPARTMENT2	0.25	0
PROT2425	COMPARTMENT2	0.75	0
PROT2328	COMPARTMENT2	0.5	0
PROT3162	COMPARTMENT2	0.5	0
PROT2379	COMPARTMENT2	0.5	0
PROT2722	COMPARTMENT2	0.5	0
PROT1098	COMPARTMENT2	1	0.631762
PROT150	COMPARTMENT2	1	0.44796
PROT3778	COMPARTMENT2	0.5	0
PROT3506	COMPARTMENT2	0.25	0
PROT1040	COMPARTMENT2	1	1
PROT3749	COMPARTMENT2	0.25	0
PROT2661	COMPARTMENT2	0.75	0
PROT145	COMPARTMENT2	1	0.793639
PROT3003	COMPARTMENT2	0.5	0.55187
PROT2334	COMPARTMENT2	0.5	1
PROT1316	COMPARTMENT2	1	0.753598
PROT1089	COMPARTMENT2	1	0
PROT1062	COMPARTMENT2	1	0.673514
PROT3815	COMPARTMENT2	0.5	0
PROT4105	COMPARTMENT2	0.25	0
PROT2382	COMPARTMENT2	0.75	0
PROT1093	COMPARTMENT2	1	0.798011
PROT197	COMPARTMENT2	1	0
PROT3217	COMPARTMENT2	0.25	0
PROT2341	COMPARTMENT2	0.75	0.518128
PROT2411	COMPARTMENT2	0.75	0
PROT2301	COMPARTMENT2	0.75	0
PROT2375	COMPARTMENT2	0.75	0.787036
PROT2976	COMPARTMENT2	0.25	0
PROT3755	COMPARTMENT2	0.25	0
PROT2640	COMPARTMENT2	0.25	0
PROT2505	COMPARTMENT2	0.5	0
PROT1031	COMPARTMENT2	1	0.719359
PROT2549	COMPARTMENT2	0.25	0
PROT2480	COMPARTMENT2	0.5	0
PROT2106	COMPARTMENT2	0.5	0.448255
PROT2157	COMPARTMENT2	0.25	0
PROT1049	COMPARTMENT2	1	0.464734
PROT158	COMPARTMENT2	1	0.529774
PROT1085	COMPARTMENT2	1	1
PROT165	COMPARTMENT2	1	1
PROT3795	COMPARTMENT2	0.25	0
PROT4011	COMPARTMENT2	0.25	0
PROT179	COMPARTMENT2	1	1
PROT1059	COMPARTMENT2	1	0.644202
PROT3811	COMPARTMENT2	0.25	0
PROT3765	COMPARTMENT2	0.5	0
PROT2422	COMPARTMENT2	0.75	0.561436
PROT3738	COMPARTMENT2	0.25	0
PROT4102	COMPARTMENT2	0.25	0
PROT2950	COMPARTMENT2	0.5	0
PROT1073	COMPARTMENT2	1	0.455068
PROT3080	COMPARTMENT2	0.25	0
PROT3108	COMPARTMENT2	0.5	0
PROT3763	COMPARTMENT2	0.5	0.534651
PROT1076	COMPARTMENT2	1	0.525107
PROT2596	COMPARTMENT2	0.5	0.525831
PROT3877	COMPARTMENT2	0.25	0
PROT4118	COMPARTMENT2	0.25	0
PROT1028	COMPARTMENT2	1	0.501142
PROT2110	COMPARTMENT2	0.25	0.438795
PROT1023	COMPARTMENT2	1	0
PROT2397	COMPARTMENT2	0.75	0
PROT4059	COMPARTMENT2	0.25	0
PROT1123	COMPARTMENT2	1	1
PROT2385	COMPARTMENT2	0.75	0
PROT1561	COMPARTMENT2	1	1
PROT3412	COMPARTMENT2	0.25	0
PROT2752	COMPARTMENT2	0.5	0
PROT3671	COMPARTMENT2	0.25	0
PROT2427	COMPARTMENT2	0.75	0
PROT3888	COMPARTMENT2	0.25	0
PROT2364	COMPARTMENT2	0.75	0
PROT3309	COMPARTMENT2	0.75	0.793734
PROT4095	COMPARTMENT2	0.25	0
PROT1074	COMPARTMENT2	1	1
PROT3760	COMPARTMENT2	0.5	0.744546
PROT4008	COMPARTMENT2	0.25	0
PROT3174	COMPARTMENT2	0.25	0
PROT3625	COMPARTMENT2	0.25	0
PROT2584	COMPARTMENT2	0.25	0
PROT2392	COMPARTMENT2	0.5	0
PROT1032	COMPARTMENT2	1	1
PROT3894	COMPARTMENT2	0.25	0
PROT4016	COMPARTMENT2	0.25	0
PROT1044	COMPARTMENT2	1	0.523816
PROT2387	COMPARTMENT2	0.5	0.542368
PROT3382	COMPARTMENT2	0.75	1
PROT4004	COMPARTMENT2	0.25	0
PROT2283	COMPARTMENT2	0.75	0.500844
PROT2477	COMPARTMENT2	0.25	0
PROT4005	COMPARTMENT2	0.25	0
PROT3821	COMPARTMENT2	0.25	0
PROT2424	COMPARTMENT2	0.5	0
PROT3813	COMPARTMENT2	0.5	0
PROT2097	COMPARTMENT2	0.25	0.437362
PROT2250	COMPARTMENT2	0.25	0
PROT1064	COMPARTMENT2	1	0.510002
PROT2303	COMPARTMENT2	0.5	0.556192
PROT2321	COMPARTMENT2	0.75	0.609377
PROT3830	COMPARTMENT2	0.5	0
PROT3693	COMPARTMENT2	0.25	1
PROT3906	COMPARTMENT2	0.25	0
PROT124	COMPARTMENT2	1	0.508335
PROT3013	COMPARTMENT2	0.5	0
PROT2288	COMPARTMENT2	0.75	0
PROT2561	COMPARTMENT2	0.25	0.494646
PROT3212	COMPARTMENT2	0.5	0
PROT2343	COMPARTMENT2	0.5	0
PROT1017	COMPARTMENT2	1	0.493339
PROT1079	COMPARTMENT2	1	1
PROT4001	COMPARTMENT2	0.25	0
PROT2466	COMPARTMENT2	0.75	0.809528
PROT170	COMPARTMENT2	1	0
PROT4071	COMPARTMENT2	0.25	0
PROT2515	COMPARTMENT2	0.25	0
PROT3787	COMPARTMENT2	0.5	0
PROT3390	COMPARTMENT2	0.5	0
PROT2407	COMPARTMENT2	0.25	0
PROT1107	COMPARTMENT2	1	0
PROT4064	COMPARTMENT2	0.5	0
PROT2050	COMPARTMENT2	0.5	0.537892
PROT3646	COMPARTMENT2	0.25	0
PROT2504	COMPARTMENT2	0.25	0
PROT2276	COMPARTMENT2	0.5	0
PROT2339	COMPARTMENT2	0.75	1
PROT2410	COMPARTMENT2	0.75	0
PROT2689	COMPARTMENT2	0.5	0
PROT177	COMPARTMENT2	1	0.558634
PROT3712	COMPARTMENT2	0.25	0.715989
PROT3800	COMPARTMENT2	0.5	0
PROT4003	COMPARTMENT2	0.25	0
PROT2735	COMPARTMENT2	0.5	0
PROT2446	COMPARTMENT2	0.5	0
PROT3880	COMPARTMENT2	0.25	0
PROT143	COMPARTMENT2	1	0.430802
PROT4065	COMPARTMENT2	0.25	0
PROT3677	COMPARTMENT2	0.5	0
PROT3891	COMPARTMENT2	0.25	0
PROT2365	COMPARTMENT2	0.75	0
PROT2449	COMPARTMENT2	0.75	0
PROT2378	COMPARTMENT2	0.75	1
PROT2787	COMPARTMENT2	0.5	0
PROT134	COMPARTMENT2	1	0.575425
PROT3068	COMPARTMENT2	0.5	0
PROT164	COMPARTMENT2	1	0
PROT3393	COMPARTMENT2	0.25	0
PROT1027	COMPARTMENT2	1	0.472696
PROT2103	COMPARTMENT2	0.5	0.493135
PROT3752	COMPARTMENT2	0.5	0
PROT149	COMPARTMENT2	1	0.485479
PROT1102	COMPARTMENT2	1	0.501319
PROT2406	COMPARTMENT2	0.5	0.457377
PROT2331	COMPARTMENT2	0.5	0
PROT3953	COMPARTMENT2	0.25	0
PROT2143	COMPARTMENT2	0.25	0
PROT4083	COMPARTMENT2	0.25	0
PROT1704	COMPARTMENT2	1	0.489799
PROT2519	COMPARTMENT2	0.5	0
PROT2453	COMPARTMENT2	0.75	0.502265
PROT2396	COMPARTMENT2	0.75	0.690953
PROT1553	COMPARTMENT2	1	0.508056
PROT154	COMPARTMENT2	1	0
PROT3966	COMPARTMENT2	0.25	0
PROT2441	COMPARTMENT2	0.5	0.514156
PROT1056	COMPARTMENT2	1	0.531764
PROT2261	COMPARTMENT2	0.25	0
PROT2236	COMPARTMENT2	0.25	0.460772
PROT2299	COMPARTMENT2	0.5	0
PROT3429	COMPARTMENT2	0.25	0
PROT3374	COMPARTMENT2	0.25	0
PROT3828	COMPARTMENT2	0.5	0
PROT3606	COMPARTMENT2	0.25	0
PROT3806	COMPARTMENT2	0.5	0
PROT2667	COMPARTMENT2	0.25	0
PROT3836	COMPARTMENT2	0.25	0
PROT2418	COMPARTMENT2	0.5	0.43718
PROT3974	COMPARTMENT2	0.25	0
PROT1116	COMPARTMENT2	1	0.453346
PROT1035	COMPARTMENT2	1	0.534861
PROT2546	COMPARTMENT2	0.25	0
PROT1037	COMPARTMENT2	1	0.535938
PROT1038	COMPARTMENT2	1	0.560238
PROT3049	COMPARTMENT2	0.5	0
PROT3784	COMPARTMENT2	0.5	0
PROT3841	COMPARTMENT2	0.25	0
PROT3391	COMPARTMENT2	0.25	0
PROT3871	COMPARTMENT2	0.25	0
PROT2429	COMPARTMENT2	0.5	0
PROT2717	COMPARTMENT2	0.25	0
PROT132	COMPARTMENT2	1	1
PROT1106	COMPARTMENT2	1	0.813735
PROT174	COMPARTMENT2	1	0.535631
PROT3992	COMPARTMENT2	0.25	0
PROT3520	COMPARTMENT2	0.5	0
PROT3846	COMPARTMENT2	0.25	0
PROT3999	COMPARTMENT2	0.25	0
PROT2374	COMPARTMENT2	0.5	0
PROT3372	COMPARTMENT2	0.25	0
PROT2102	COMPARTMENT2	0.5	0.429187
PROT2257	COMPARTMENT2	0.5	0.543111
PROT3445	COMPARTMENT2	0.25	0
PROT2823	COMPARTMENT2	0.75	0
PROT3809	COMPARTMENT2	0.5	0
PROT3523	COMPARTMENT2	0.5	0
PROT2356	COMPARTMENT2	0.5	0
PROT2395	COMPARTMENT2	0.75	0.712926
PROT3478	COMPARTMENT2	0.25	0
PROT2287	COMPARTMENT2	0.5	0
PROT3832	COMPARTMENT2	0.25	0
PROT2438	COMPARTMENT2	0.5	0
PROT2315	COMPARTMENT2	0.75	0
PROT1110	COMPARTMENT2	1	0.734342
PROT2428	COMPARTMENT2	0.5	0
PROT1114	COMPARTMENT2	1	0
PROT3794	COMPARTMENT2	0.5	0
PROT3235	COMPARTMENT3	0.25	0
PROT3609	COMPARTMENT3	0.5	0.527373
PROT2454	COMPARTMENT3	0.5	0.124791
PROT3146	COMPARTMENT3	0.25	0
PROT231	COMPARTMENT3	1	1
PROT2211	COMPARTMENT3	0.5	0.424405
PROT3060	COMPARTMENT3	0.5	0.431829
PROT2543	COMPARTMENT3	0.75	0.475877
PROT2485	COMPARTMENT3	0.75	1
PROT3571	COMPARTMENT3	0.5	0.241401
PROT208	COMPARTMENT3	1	1
PROT2512	COMPARTMENT3	0.75	0.769618
PROT3932	COMPARTMENT3	0.25	0
PROT3420	COMPARTMENT3	0.25	0.131801
PROT1192	COMPARTMENT3	1	1
PROT3220	COMPARTMENT3	0.5	0.422008
PROT3939	COMPARTMENT3	0.25	0
PROT2875	COMPARTMENT3	0.25	0
PROT3364	COMPARTMENT3	0.5	0.436885
PROT3446	COMPARTMENT3	0.25	0
PROT244	COMPARTMENT3	1	1
PROT3325	COMPARTMENT3	0.5	0.591722
PROT1177	COMPARTMENT3	1	1
PROT3263	COMPARTMENT3	0.5	0.359567
PROT2495	COMPARTMENT3	0.75	0.775881
PROT2401	COMPARTMENT3	0.25	0.339844
PROT218	COMPARTMENT3	1	0.761467
PROT2513	COMPARTMENT3	0.75	0.832071
PROT3819	COMPARTMENT3	0.5	0.694386
PROT4031	COMPARTMENT3	0.25	0.144804
PROT2562	COMPARTMENT3	0.75	1
PROT2457	COMPARTMENT3	0.75	1
PROT2604	COMPARTMENT3	0.5	1
PROT261	COMPARTMENT3	1	1
PROT2042	COMPARTMENT3	0.25	0.26092
PROT3792	COMPARTMENT3	0.25	0.575307
PROT2085	COMPARTMENT3	0.25	0.259817
PROT3859	COMPARTMENT3	0.25	0.288335
PROT214	COMPARTMENT3	1	1
PROT2669	COMPARTMENT3	0.25	0
PROT2901	COMPARTMENT3	0.25	0.130745
PROT1265	COMPARTMENT3	1	1
PROT2204	COMPARTMENT3	0.5	0.259814
PROT294	COMPARTMENT3	1	0.894396
PROT1253	COMPARTMENT3	1	1
PROT1161	COMPARTMENT3	1	0.899885
PROT2061	COMPARTMENT3	0.25	0
PROT213	COMPARTMENT3	1	1
PROT2574	COMPARTMENT3	0.5	0.399926
PROT3468	COMPARTMENT3	0.25	0.186161
PROT3352	COMPARTMENT3	0.25	0.134395
PROT2610	COMPARTMENT3	0.75	1
PROT1200	COMPARTMENT3	1	1
PROT1267	COMPARTMENT3	1	1
PROT3190	COMPARTMENT3	0.25	0
PROT2399	COMPARTMENT3	0.5	0.463581
PROT3316	COMPARTMENT3	0.5	0.508868
PROT2483	COMPARTMENT3	0.75	1
PROT2472	COMPARTMENT3	0.75	0.824891
PROT257	COMPARTMENT3	1	1
PROT4127	COMPARTMENT3	0.25	0.139395
PROT2644	COMPARTMENT3	0.5	0.222689
PROT1184	COMPARTMENT3	1	1
PROT1216	COMPARTMENT3	1	1
PROT4026	COMPARTMENT3	0.25	0.257651
PROT2586	COMPARTMENT3	0.75	0.782018
PROT2063	COMPARTMENT3	0.5	1
PROT2514	COMPARTMENT3	0.75	1
PROT1138	COMPARTMENT3	1	1
PROT2944	COMPARTMENT3	0.5	0.346666
PROT2636	COMPARTMENT3	0.75	0.549547
PROT203	COMPARTMENT3	1	0.883554
PROT4037	COMPARTMENT3	0.5	0.285254
PROT3777	COMPARTMENT3	0.25	0.602003
PROT2742	COMPARTMENT3	0.25	0
PROT3938	COMPARTMENT3	0.25	0
PROT2484	COMPARTMENT3	0.75	0.873121
PROT3692	COMPARTMENT3	0.5	0.483919
PROT265	COMPARTMENT3	1	1
PROT1164	COMPARTMENT3	1	1
PROT305	COMPARTMENT3	1	1
PROT215	COMPARTMENT3	1	1
PROT1206	COMPARTMENT3	1	1
PROT315	COMPARTMENT3	1	1
PROT2150	COMPARTMENT3	0.25	0
PROT275	COMPARTMENT3	1	1
PROT3770	COMPARTMENT3	0.25	0.462891
PROT3850	COMPARTMENT3	0.5	0.576429
PROT291	COMPARTMENT3	1	1
PROT1279	COMPARTMENT3	1	1
PROT2616	COMPARTMENT3	0.5	0.6278
PROT2573	COMPARTMENT3	0.75	0.854225
PROT2749	COMPARTMENT3	0.5	0.36321
PROT2554	COMPARTMENT3	0.5	1
PROT2529	COMPARTMENT3	0.5	0.243553
PROT1262	COMPARTMENT3	1	0.904946
PROT301	COMPARTMENT3	1	1
PROT2697	COMPARTMENT3	0.25	0.18085
PROT3730	COMPARTMENT3	0.25	0.190316
PROT4029	COMPARTMENT3	0.25	0
PROT3985	COMPARTMENT3	0.25	0
PROT3853	COMPARTMENT3	0.5	0.742684
PROT3924	COMPARTMENT3	0.5	0.756458
PROT3775	COMPARTMENT3	0.25	1
PROT2582	COMPARTMENT3	0.75	0.71721
PROT3587	COMPARTMENT3	0.5	0.407138
PROT3869	COMPARTMENT3	0.25	0.195003
PROT1269	COMPARTMENT3	1	1
PROT2069	COMPARTMENT3	0.25	0
PROT201	COMPARTMENT3	1	1
PROT2666	COMPARTMENT3	0.5	0.180644
PROT239	COMPARTMENT3	1	1
PROT3833	COMPARTMENT3	0.5	0.612569
PROT2707	COMPARTMENT3	0.25	0
PROT3823	COMPARTMENT3	0.5	0.740127
PROT2594	COMPARTMENT3	0.5	0.320683
PROT1158	COMPARTMENT3	1	1
PROT2553	COMPARTMENT3	0.75	0.678959
PROT3980	COMPARTMENT3	0.25	0.304782
PROT3916	COMPARTMENT3	0.25	0.27544
PROT1151	COMPARTMENT3	1	0.825502
PROT3854	COMPARTMENT3	0.25	0.206167
PROT2765	COMPARTMENT3	0.5	0.434357
PROT3022	COMPARTMENT3	0.5	0.328516
PROT1228	COMPARTMENT3	1	1
PROT1264	COMPARTMENT3	1	0.885557
PROT3100	COMPARTMENT3	0.5	0.23252
PROT1272	COMPARTMENT3	1	0.88296
PROT3892	COMPARTMENT3	0.25	0.51541
PROT3825	COMPARTMENT3	0.5	0.406455
PROT2651	COMPARTMENT3	0.25	0.170268
PROT202	COMPARTMENT3	1	0.883754
PROT3710	COMPARTMENT3	0.25	0
PROT2522	COMPARTMENT3	0.75	0.534651
PROT2452	COMPARTMENT3	0.5	0.136686
PROT269	COMPARTMENT3	1	1
PROT2108	COMPARTMENT3	0.5	1
PROT1288	COMPARTMENT3	1	0.832089
PROT1154	COMPARTMENT3	1	1
PROT1209	COMPARTMENT3	1	1
PROT3380	COMPARTMENT3	0.5	0.439088
PROT2635	COMPARTMENT3	0.75	0.788313
PROT248	COMPARTMENT3	1	1
PROT258	COMPARTMENT3	1	1
PROT3997	COMPARTMENT3	0.25	0
PROT2581	COMPARTMENT3	0.5	0.203723
PROT1136	COMPARTMENT3	1	0.596851
PROT250	COMPARTMENT3	1	1
PROT233	COMPARTMENT3	1	1
PROT204	COMPARTMENT3	1	1
PROT1275	COMPARTMENT3	1	1
PROT1570	COMPARTMENT3	1	1
PROT2353	COMPARTMENT3	0.25	0.365444
PROT2613	COMPARTMENT3	0.75	0.728805
PROT4052	COMPARTMENT3	0.25	0.134113
PROT2566	COMPARTMENT3	0.5	0.397086
PROT3422	COMPARTMENT3	0.5	0.490937
PROT2631	COMPARTMENT3	0.75	0.695246
PROT2602	COMPARTMENT3	0.75	0.907434
PROT1146	COMPARTMENT3	1	0.728075
PROT2876	COMPARTMENT3	0.5	0.193061
PROT2511	COMPARTMENT3	0.5	0.383967
PROT3379	COMPARTMENT3	0.25	0
PROT1155	COMPARTMENT3	1	0.900294
PROT277	COMPARTMENT3	1	1
PROT2634	COMPARTMENT3	0.75	0.631147
PROT1220	COMPARTMENT3	1	1
PROT266	COMPARTMENT3	1	1
PROT1205	COMPARTMENT3	1	1
PROT2481	COMPARTMENT3	0.5	0.451542
PROT2371	COMPARTMENT3	0.5	1
PROT2187	COMPARTMENT3	0.5	0.317415
PROT1295	COMPARTMENT3	1	1
PROT3411	COMPARTMENT3	0.5	0.480897
PROT2629	COMPARTMENT3	0.75	0.689731
PROT308	COMPARTMENT3	1	1
PROT2839	COMPARTMENT3	0.5	0.257357
PROT2533	COMPARTMENT3	0.5	0.374237
PROT226	COMPARTMENT3	1	0.802998
PROT1232	COMPARTMENT3	1	0.90625
PROT1168	COMPARTMENT3	1	0.841686
PROT1696	COMPARTMENT3	1	1
PROT2508	COMPARTMENT3	0.75	0.5591
PROT2658	COMPARTMENT3	0.5	0.446823
PROT4044	COMPARTMENT3	0.25	0
PROT3553	COMPARTMENT3	0.5	0.415026
PROT2210	COMPARTMENT3	0.5	1
PROT1195	COMPARTMENT3	1	1
PROT2587	COMPARTMENT3	0.5	1
PROT3884	COMPARTMENT3	0.5	1
PROT1162	COMPARTMENT3	1	1
PROT3822	COMPARTMENT3	0.5	0.510183
PROT222	COMPARTMENT3	1	1
PROT2637	COMPARTMENT3	0.75	0.889128
PROT230	COMPARTMENT3	1	1
PROT211	COMPARTMENT3	1	1
PROT1225	COMPARTMENT3	1	0.907005
PROT2771	COMPARTMENT3	0.5	0.324039
PROT1215	COMPARTMENT3	1	1
PROT4103	COMPARTMENT3	0.25	0.302584
PROT2825	COMPARTMENT3	0.25	0
PROT3396	COMPARTMENT3	0.25	0
PROT2593	COMPARTMENT3	0.5	0.290532
PROT2191	COMPARTMENT3	0.25	1
PROT3173	COMPARTMENT3	0.25	0
PROT3630	COMPARTMENT3	0.5	0.379637
PROT2509	COMPARTMENT3	0.75	0.621896
PROT1173	COMPARTMENT3	1	0.814138
PROT2277	COMPARTMENT3	0.25	0.415984
PROT2569	COMPARTMENT3	0.75	0.78345
PROT3937	COMPARTMENT3	0.25	0.229024
PROT2080	COMPARTMENT3	0.5	0.321452
PROT2541	COMPARTMENT3	0.75	0.877187
PROT2905	COMPARTMENT3	0.25	0.137338
PROT281	COMPARTMENT3	1	1
PROT3993	COMPARTMENT3	0.25	0.267026
PROT241	COMPARTMENT3	1	0.88572
PROT2895	COMPARTMENT3	0.5	0.298793
PROT1276	COMPARTMENT3	1	1
PROT2642	COMPARTMENT3	0.5	0.279011
PROT2614	COMPARTMENT3	0.75	0.900637
PROT1152	COMPARTMENT3	1	1
PROT3996	COMPARTMENT3	0.25	0.403845
PROT2643	COMPARTMENT3	0.5	0.262183
PROT3840	COMPARTMENT3	0.5	0.830858
PROT1213	COMPARTMENT3	1	1
PROT285	COMPARTMENT3	1	1
PROT3962	COMPARTMENT3	0.25	0
PROT2274	COMPARTMENT3	0.5	0.392694
PROT3890	COMPARTMENT3	0.25	0.371579
PROT1268	COMPARTMENT3	1	0.901423
PROT3458	COMPARTMENT3	0.5	0.441062
PROT2462	COMPARTMENT3	0.5	0.481587
PROT2677	COMPARTMENT3	0.5	0.113863
PROT2482	COMPARTMENT3	0.5	0.376522
PROT1286	COMPARTMENT3	1	1
PROT2118	COMPARTMENT3	0.5	0.412336
PROT2598	COMPARTMENT3	0.75	1
PROT1199	COMPARTMENT3	1	1
PROT2762	COMPARTMENT3	0.25	0
PROT2467	COMPARTMENT3	0.75	0.760078
PROT3548	COMPARTMENT3	0.5	0.396546
PROT2068	COMPARTMENT3	0.5	1
PROT2362	COMPARTMENT3	0.25	0.342083
PROT3769	COMPARTMENT3	0.25	0.661442
PROT3338	COMPARTMENT3	0.25	0
PROT1278	COMPARTMENT3	1	1
PROT2488	COMPARTMENT3	0.5	0
PROT1188	COMPARTMENT3	1	0.751574
PROT3783	COMPARTMENT3	0.25	0.255794
PROT2664	COMPARTMENT3	0.25	0.134091
PROT3824	COMPARTMENT3	0.5	0.345446
PROT245	COMPARTMENT3	1	1
PROT2600	COMPARTMENT3	0.5	0.342968
PROT2563	COMPARTMENT3	0.75	0.691374
PROT2134	COMPARTMENT3	0.5	1
PROT2628	COMPARTMENT3	0.75	0.71711
PROT252	COMPARTMENT3	1	1
PROT3410	COMPARTMENT3	0.25	0
PROT1159	COMPARTMENT3	1	0.713797
PROT2464	COMPARTMENT3	0.5	0.537844
PROT3052	COMPARTMENT3	0.25	0
PROT2657	COMPARTMENT3	0.5	0.335298
PROT3725	COMPARTMENT3	0.25	0
PROT2525	COMPARTMENT3	0.75	0.756489
PROT1157	COMPARTMENT3	1	0.655965
PROT3782	COMPARTMENT3	0.25	0.495477
PROT1261	COMPARTMENT3	1	1
PROT2538	COMPARTMENT3	0.75	0.818766
PROT2580	COMPARTMENT3	0.75	1
PROT298	COMPARTMENT3	1	1
PROT4040	COMPARTMENT3	0.25	0.148697
PROT3615	COMPARTMENT3	0.25	0
PROT2943	COMPARTMENT3	0.25	0
PROT3864	COMPARTMENT3	0.25	0.585334
PROT299	COMPARTMENT3	1	0.88539
PROT1210	COMPARTMENT3	1	1
PROT2492	COMPARTMENT3	0.75	0.64357
PROT3739	COMPARTMENT3	0.25	0.270008
PROT236	COMPARTMENT3	1	1
PROT1230	COMPARTMENT3	1	1
PROT259	COMPARTMENT3	1	1
PROT3681	COMPARTMENT3	0.75	0.766307
PROT3610	COMPARTMENT3	0.25	0.163824
PROT3494	COMPARTMENT3	0.5	0.434016
PROT1170	COMPARTMENT3	1	1
PROT3251	COMPARTMENT3	0.75	0.802771
PROT3773	COMPARTMENT3	0.25	0.696019
PROT1226	COMPARTMENT3	1	0.877424
PROT2647	COMPARTMENT3	0.75	0.670182
PROT4081	COMPARTMENT3	0.25	0.274877
PROT2502	COMPARTMENT3	0.5	0.419461
PROT310	COMPARTMENT3	1	1
PROT3762	COMPARTMENT3	0.5	0.409096
PROT1165	COMPARTMENT3	1	1
PROT893	COMPARTMENT3	1	1
PROT2476	COMPARTMENT3	0.5	0.277631
PROT2619	COMPARTMENT3	0.75	1
PROT235	COMPARTMENT3	1	1
PROT2578	COMPARTMENT3	0.5	0.204562
PROT1068	COMPARTMENT3	1	1
PROT1181	COMPARTMENT3	1	0.743436
PROT253	COMPARTMENT3	1	1
PROT3834	COMPARTMENT3	0.5	0.931764
PROT1281	COMPARTMENT3	1	0.779327
PROT2545	COMPARTMENT3	0.5	0.475125
PROT3455	COMPARTMENT3	0.5	0.392495
PROT2306	COMPARTMENT3	0.25	0.434906
PROT2489	COMPARTMENT3	0.5	1
PROT240	COMPARTMENT3	1	1
PROT1185	COMPARTMENT3	1	1
PROT2498	COMPARTMENT3	0.5	0.346593
PROT1246	COMPARTMENT3	1	1
PROT2639	COMPARTMENT3	0.75	0.475087
PROT2622	COMPARTMENT3	0.75	1
PROT2692	COMPARTMENT3	0.5	0.426183
PROT312	COMPARTMENT3	1	1
PROT306	COMPARTMENT3	1	0.883731
PROT1289	COMPARTMENT3	1	0.725282
PROT3968	COMPARTMENT3	0.25	0.176809
PROT3510	COMPARTMENT3	0.25	0
PROT3804	COMPARTMENT3	0.25	0.468861
PROT1266	COMPARTMENT3	1	1
PROT225	COMPARTMENT3	1	1
PROT3703	COMPARTMENT3	0.25	0
PROT272	COMPARTMENT3	1	1
PROT3647	COMPARTMENT3	0.25	0.128321
PROT1186	COMPARTMENT3	1	1
PROT207	COMPARTMENT3	1	0.882148
PROT3200	COMPARTMENT3	0.75	0.861609
PROT268	COMPARTMENT3	1	1
PROT1203	COMPARTMENT3	1	1
PROT1258	COMPARTMENT3	1	1
PROT2987	COMPARTMENT3	0.5	0.292715
PROT3852	COMPARTMENT3	0.5	0.672287
PROT1214	COMPARTMENT3	1	1
PROT3601	COMPARTMENT3	0.25	0.128965
PROT2624	COMPARTMENT3	0.75	0.823332
PROT2294	COMPARTMENT3	0.25	0.352672
PROT1263	COMPARTMENT3	1	1
PROT3849	COMPARTMENT3	0.5	0.608422
PROT4087	COMPARTMENT3	0.25	0
PROT199	COMPARTMENT3	1	1
PROT2648	COMPARTMENT3	0.75	1
PROT2324	COMPARTMENT3	0.5	1
PROT2633	COMPARTMENT3	0.5	0.331914
PROT3998	COMPARTMENT3	0.25	0.32004
PROT2612	COMPARTMENT3	0.75	0.663879
PROT1207	COMPARTMENT3	1	1
PROT238	COMPARTMENT3	1	1
PROT2571	COMPARTMENT3	0.5	0.237653
PROT2626	COMPARTMENT3	0.75	0.737351
PROT2544	COMPARTMENT3	0.75	1
PROT3517	COMPARTMENT3	0.25	0
PROT288	COMPARTMENT3	1	0.887738
PROT2460	COMPARTMENT3	0.75	0.360448
PROT2491	COMPARTMENT3	0.5	1
PROT2539	COMPARTMENT3	0.75	1
PROT3967	COMPARTMENT3	0.5	0.514741
PROT2588	COMPARTMENT3	0.75	0.610035
PROT4097	COMPARTMENT3	0.25	0.131444
PROT2547	COMPARTMENT3	0.75	0.577361
PROT3714	COMPARTMENT3	0.25	0
PROT2577	COMPARTMENT3	0.75	0.832618
PROT219	COMPARTMENT3	1	1
PROT2216	COMPARTMENT3	0.5	0.236588
PROT2459	COMPARTMENT3	0.5	0.477245
PROT2650	COMPARTMENT3	0.75	0.791647
PROT4123	COMPARTMENT3	0.25	0.163225
PROT3844	COMPARTMENT3	0.5	0.407792
PROT2499	COMPARTMENT3	0.5	0.525306
PROT267	COMPARTMENT3	1	0.900486
PROT2496	COMPARTMENT3	0.75	0.686053
PROT2528	COMPARTMENT3	0.5	0.160011
PROT4066	COMPARTMENT3	0.25	0
PROT1292	COMPARTMENT3	1	1
PROT1132	COMPARTMENT3	1	1
PROT209	COMPARTMENT3	1	1
PROT2281	COMPARTMENT3	0.25	0.270104
PROT293	COMPARTMENT3	1	0.808392
PROT1204	COMPARTMENT3	1	1
PROT263	COMPARTMENT3	1	1
PROT2917	COMPARTMENT3	0.5	0.307225
PROT2663	COMPARTMENT3	0.5	0.360576
PROT200	COMPARTMENT3	1	0.896659
PROT246	COMPARTMENT3	1	1
PROT3922	COMPARTMENT3	0.25	0.48891
PROT1169	COMPARTMENT3	1	1
PROT2557	COMPARTMENT3	0.75	0.759597
PROT2572	COMPARTMENT3	0.5	1
PROT3753	COMPARTMENT3	0.25	0.774654
PROT2506	COMPARTMENT3	0.5	0.18464
PROT205	COMPARTMENT3	1	1
PROT3764	COMPARTMENT3	0.25	0.276768
PROT4110	COMPARTMENT3	0.25	0.342451
PROT1277	COMPARTMENT3	1	1
PROT3745	COMPARTMENT3	0.25	0
PROT2911	COMPARTMENT3	0.5	0.368508
PROT3696	COMPARTMENT3	0.25	0.435122
PROT3907	COMPARTMENT3	0.25	0
PROT1270	COMPARTMENT3	1	1
PROT1244	COMPARTMENT3	1	1
PROT2970	COMPARTMENT3	0.25	0
PROT3497	COMPARTMENT3	0.5	0.279814
[truncated: 4,467 more rows]

## Sheet: 04_G
	actual simulated single location
		C1	C2	C3	C4	C5	C6	C7	C8
mean CC	C1	0.84	0.26	0	0	0	0	0	0
	C2	0.12	0.6	0	0	0	0	0	0
	C3	0.04	0.13	0.95	0.02	0	0	0	0
	C4	0	0	0.05	0.95	0.01	0	0	0
	C5	0	0	0	0	0.85	0.12	0	0
	C6	0	0	0	0	0.14	0.85	0	0
	C7	0	0	0	0	0	0.03	0.91	0.02
	C8	0	0	0	0	0	0	0.09	0.98

[truncated: 9 more sheets: 04_H, 04_I, 04_J, 04_K, 04_L, 04_M, 04_N, 04_O, 04_P]
