# Supplementary material for: C-COMPASS: a user-friendly neural network tool profiles cell compartments at protein and lipid levels
Source: Nat Methods. 2025 Dec 4;23(1):118–30. doi: 10.1038/s41592-025-02880-3 (PMC12791020; doi:10.1038/s41592-025-02880-3)
Supplement: Supplementary file 21 — Humanized liver spatial proteomics. [file 41592_2025_2880_MOESM21_ESM.xlsx]

## Sheet: 05_B
Identifier	chow_median_Fr.1	chow_median_Fr.2	chow_median_Fr.3	chow_median_Fr.4	chow_median_Fr.5	chow_median_Fr.6	chow_median_Fr.7	chow_median_Fr.8	chow_median_Fr.9	chow_median_Fr.10	chow_median_Fr.11	chow_median_Fr.12	chow_median_Fr.13	chow_median_Fr.14
A0A024QZ33;K7EK40;K7EMD8;K7ERM9;Q9H0G5	0.400637	0	1	0	0	0.221832	0	0	0	0	0	0	0	0
A0A024QZW4;Q9H1N7	0	0	0	0	0	1	0	0	0	0	0	0	0	0
A0A024QZX5;A0A087X1N8;A0A2R8YD12;P35237	1	0.732129	0.802728	0.345505	0.115203	0.570651	0.548111	0.317285	0.00832724	0.0431832	0	0.0155843	0.105749	0.238486
A0A024R3B9;E9PJL7;E9PNH7;E9PRA8;P02511	0.453475	0.338626	0.896789	1	0.306883	0.125592	0.0700523	0	0	0	0	0.235243	0	0.350404
A0A024R4E5;Q00341	0.0148397	0	0.0363357	0.0492257	0.0894518	0.105623	0.18211	0.218326	0.29886	0.420934	0.7179	1	0.738428	0.51685
A0A024R571;Q9H4M9	0.0915878	0.23454	0.158635	0.315917	0.0833802	0.336209	0.487276	0.67733	1	0.480472	0.282148	0.277442	0.142059	0
A0A024R5I4;O94956	0	0	0	0	0	0.157695	0.367287	0.398362	0.547901	0.810263	0.54543	0.580727	0.346704	1
A0A024R6I7;P01009	0.31093	0.209173	0.081139	0	0.0401763	0.500411	0.915524	1	0.833763	0.618232	0.243811	0.0786509	0.327515	0.23683
A0A024R7W5;A0A087WY31;A0A087X0Q1;Q7Z739	0.0230809	0.208411	0.138723	0	0.219799	0.207689	0.321685	0.320339	0.345972	0.0768367	0.284596	1	0.418003	0.795171
A0A024RA52;P25787	0.348095	0.576927	1	0.809176	0.503951	0.300201	0.296501	0.132948	0.12078	0.125047	0.0199024	0	0.037728	0.0165897
A0A024RAC6;Q14241	0.661891	1	0.321717	0.31763	0.371846	0.216189	0.227734	0.131374	0.131846	0	0	0	0	0
A0A024RBG1;Q9NZJ9-2	0.852197	1	0.593145	0.508209	0.219436	0.160039	0.153566	0.103418	0.072704	0.0986945	0.0384349	0	0.0545627	0.0746177
A0A024RCG2;Q96BI1	0.0825185	0	0.0100209	0.124192	0.367467	0.751177	0.629999	1	0.829057	0.617831	0.514794	0.549926	0.393284	0.449543
A0A024RCN4;A0A087X2F1;B4DMT1;Q16670;Q16670-2	0	0	0	0	0	0	0	0	0	0	0	0	0	1
A0A024RCQ8;A0A0G2JH76;A0A0G2JHB6;A0A0G2JIU6;A0A0G2JK02;A0A0G2JKR3;A0A0G2JLA3;A0A0G2JLL3;A0A140T8X7;A0A140T9Y1;G8JLL2;Q9UMR5;Q9UMR5-2;Q9UMR5-3	0	0	0	0	0	0	0	0.472744	0.309896	0.41457	1	0	0.399096	0.0469831
A0A024RCR6;A0A0G2JK23;P46379;P46379-2;P46379-3	0.576594	1	0.724349	0.594186	0.430053	0.247615	0.250265	0.157165	0.0958011	0.140506	0	0.0537803	0.0888357	0.0883929
A0A044PY82	0.418875	0	0.210447	0.0678323	0.0595301	0	0.226184	0.425136	0.437061	0.729169	0.50239	0.457986	0.304286	1
A0A067XG54;Q8NB49;Q8NB49-2;Q8NB49-3;Q8NB49-4	0.070584	0.39583	0.00899295	0	0.170195	0.216593	0.190524	0.3815	0.572078	0.641907	0.509175	0.448742	0.0705033	1
A0A075B6F0;H7BXG6;M0R167;Q9H0D2;Q9H0D2-2
A0A075B6F9;Q9Y314	0.851643	0.660794	0	0.233082	0.244393	1	0.487242	0.186367	0	0	0	0	0	0
A0A075B6G3;A0A087WTU7;A0A087WV90;A0A5H1ZRP8;P11532;P11532-11;P11532-4	0.199319	0.0329918	0.0449301	0.0148177	0.00601523	0	0.120311	0.308334	0.343755	0.637243	0.61658	0.555159	0.256171	1
A0A075B6U9	0	0	0	0	0	0	0	0	0	0.176842	0.795721	0	1	0.56394
A0A075B6W5	0	0	1	0	0	0	0.900251	0	0	0	0	0	0	0.929301
A0A075B727;A0A075B728;P16284;P16284-2;P16284-3;P16284-4;P16284-5;P16284-6	0	0	1	0.497038	0	0	0	0	0	0	0	0	0	0
A0A075B730;P58107	0	0	0	0	0	0	0	0	0.0719843	0.207849	0.144299	0.40799	0.11921	1
A0A075B749;A0A087WX83;Q5VU43;Q5VU43-3;Q5VU43-4	0.544044	1	0.880365	0.95591	0.719302	0.427731	0.455059	0.239197	0.449279	0.447405	0.673092	0.3107	0	0.485358
A0A075B754;Q96QE3;Q96QE3-2	0.204466	0.531348	0.375242	0.259447	0	0.0392473	0.0795535	0.0798621	0.2174	0.0410705	1	0.546487	0.537204	0.243057
A0A075B773;K7ELY8;O00623	0	0	0	0	0	0	0	0	0	0	1	0	0	0
A0A075B784;E9PEW0;K7ELR5;Q8IXW9;Q9P275	0	0	0	0	0	0	0	0	0	0	0	0	0	1
A0A075B7B1;C9JIE4;O15061;O15061-2;O15061-3
A0A075B7B5;B7ZM87;O75044	0.689376	1	0.732201	0.52445	0.422548	0.293448	0.312968	0.34056	0.475356	0.296414	0.305503	0.310475	0	0.313084
A0A075B7F1;S4R3C0	1	0	0	0	0	0	0	0	0	0	0	0	0	0
A0A087WSV6;A0A087WSX8;A0A0B4J1W1;A0A0G2JLS4;A0A0G2JM99;A0A0G2JMY9;A0A0G2JNK9;A0A0G2JNM2;A0A0G2JNQ6;A0A0G2JNR3;A0A0G2JP64;A0A0G2JP80;A0A0G2JP96;A0A0G2JQ15;A0A0G2JQ44;A0A0G2JQ46;A8MVE2;D9IDM5;D9IDM6;F6RVM3;F6TER3;O75019;O75019-2;Q8N6C8;Q8N6C8-3;Q8NHL6;Q8NHL6-2;Q8NHL6-3;Q8NHL6-4;Q8NHL6-5
A0A087WSW7;A0A0B4J1V9;F6XU50;Q9NRZ9;Q9NRZ9-2;Q9NRZ9-3;Q9NRZ9-4;Q9NRZ9-5;Q9NRZ9-6
A0A087WSW9;A0A087WSY9;Q16881;Q16881-3;Q16881-4	0.5746	1	0.505202	0.526706	0.270058	0.204033	0.169516	0.0919924	0.108078	0.0614199	0.0489626	0	0.0341493	0.00837268
A0A087WSY1;O15146;O15146-2;O15146-3;Q5T0B5
A0A087WSY5;Q96IY4	0.316762	0.235761	0.164188	0	0.563353	0.601139	1	0.939144	0.825755	0.655002	0.609783	0.734791	0.567311	0.538923
A0A087WSZ7;A0A1B0GW84;D6RHE0;Q08493;Q08493-2;Q08493-3;Q08499;Q08499-10;Q08499-11;Q08499-2;Q08499-3;Q08499-4;Q08499-5;Q08499-6;Q08499-8;Q08499-9;Q32MM7	0	1	0	0.673673	0	0	0	0	0	0	0	0	0	0
A0A087WT18;Q96A73;Q96A73-2
A0A087WT20;Q9NV06	0	0	0	0	0	0	0	0	0	0	0	0	0	1
A0A087WT23;A0A087WV67;O00124;O00124-3	0	0	0	0	0	0	0	1	0.55942	0	0	0	0	0
A0A087WT34
A0A087WT44	0.04391	0.00895541	0	0.0563183	0.253449	0.512421	0.631137	1	0.642242	0.3853	0.345358	0.365793	0.321253	0.203716
A0A087WT59;P02766	0.185656	0.053426	0	0.0533849	0.169	0.580237	0.817546	0.593103	1	0.7093	0.788464	0.76128	0.870019	0.866067
A0A087WT84;Q9H9V9;Q9H9V9-2	0	0	1	0.454959	0.682351	0	0	0	0	0	0	0	0	0
A0A087WT87;P43003;P43003-2
A0A087WT95;P49753	0.0534192	0.0622759	0.054258	0.0268505	0.0158034	0.000862119	0	0.0036594	0.0166469	0.0324076	0.451956	1	0.284437	0.221215
A0A087WTA5;E7ERK9;Q9UI10;Q9UI10-2;Q9UI10-3	0.220595	0.374151	1	0.540494	0.392924	0.268188	0.17267	0.15527	0.213455	0.341229	0	0.0975957	0.431333	0.0743094
A0A087WTA8;P08123	0.0111667	0.00378688	0.00157645	0.000503761	0.00122309	0	0.00559558	0.00399933	0.0101303	0.0343596	0.0436842	0.116748	0.0425779	1
A0A087WTJ6;O14627;P47902;P47902-2;Q99626	0	0	0	0	0	0	0	1	0.998042	0	0	0	0	0
A0A087WTK0;A0A087WVC6;Q12913	0	0	0	0	0	0	0.114543	0.176848	0.603786	0.491027	0.297503	0.572757	0	1
A0A087WTM1;Q9Y6N7;Q9Y6N7-2;Q9Y6N7-3;Q9Y6N7-4;Q9Y6N7-5;Q9Y6N7-6	0.22622	0.977052	0.623575	0.208462	0.455988	0	0.687965	0.540663	0.977337	0.752922	0.729614	1	0.236561	0.885334
A0A087WTP3;Q92945	0.472075	0.723067	0.754756	0.907861	0.809469	0.653625	0.332741	0.256416	0.136163	0.123113	0	0.0274071	0.369738	1
A0A087WTQ2;A0A3B3IT47;C9JGR9;E7EQ49;Q9Y2I8;Q9Y2I8-2;Q9Y2I8-3	0.639807	0.805544	0.362713	1	0.675272	0.454073	0	0.251922	0.118482	0.271347	0	0	0	0
A0A087WTS0;H0YJK8;P18283	0.582428	1	0.778933	0.544459	0.295295	0.245274	0.180399	0.0676301	0.122797	0.0478871	0.000600538	0	0.0458247	0.0426495
A0A087WTT2;Q5JWB9;Q96A57;Q96A57-2	0	0	0	0	0.205762	0.858912	0.817659	0.785403	1	0	0	0	0	0
A0A087WTU3;Q9Y6I9	0.0547928	0	0.186932	0.177464	0.555343	0.459829	1	0.781257	0.608682	0.411727	0.332962	0.318937	0.31409	0.1908
A0A087WTV6;A0A087WZR9;Q96C36	0	0	0	0	0	0	0	0	0	0	1	0.739155	0	0
A0A087WTY4;P49454	0	0	0	0	0	0	0	0.610627	1	0	0	0	0.776785	0
A0A087WTY7;Q9H227	0.845795	1	0.63256	0.376346	0.265087	0.186024	0.129456	0.101594	0.0968647	0.0290671	0	0	0	0
A0A087WTZ8;E5RFJ1;E5RHW9;E5RIM1;Q96MF7	0	0	0	0	0	0.0139841	0.0340474	0.086958	0.215167	0.326377	0.827177	1	0.369447	0.457933
A0A087WU02;Q96RQ1	0.0153382	0	0	0	0.373223	1	0.855854	0.922599	0.938196	0.50178	0.484252	0.339499	0.644662	0.530483
A0A087WU05;A0A087WY48;Q8IY22;Q8IY22-2;Q8IY22-3
A0A087WU07;Q5TGZ0;Q5TGZ0-2	0	0	0	0	0	0	0	0	0	0.109454	0	1	0	0
A0A087WU25	0	0	0	0	0	0	0	0	0	0	0.694931	1	0.423734	0.273389
A0A087WU31;A0A0A0MTB7;E9PE15;P51790;P51790-2;P51790-4;P51790-5	0	0	0	0	0.548087	0.679264	0.851462	0.633944	1	0.231613	0	0	0	0
A0A087WU37;A0A087WWG3;A0A087X140;A0A0A0MRU4;A0A0A6YYH9;C9J3G2;H0Y857;Q5JTY5;Q5JTY5-2;Q5RIA9;Q5RIA9-3;Q5RIB0;Q5RIB3;Q8IUF1;Q9BRT8;Q9BRT8-2;Q9BRT8-3	0.781761	0.798347	0.495406	0.627276	0	0.318865	0.220769	0.186504	0.177001	0	1	0	0	0
A0A087WU51	0	0.190395	0	1	0.556316	0.445653	0	0.245141	0	0	0	0	0	0
A0A087WU53;Q9H0U3	0.0489894	0	0	0.0339435	0.107737	0.287294	0.356316	0.614667	0.539769	0.52406	0.715039	1	0.789764	0.701833
A0A087WUB9;Q8WYA6;Q8WYA6-4	0.109553	0.284524	0.222688	0.213391	0.104699	0.0849162	0.0316282	0	0.0687655	0.123136	0.151778	0.266352	0.726138	1
A0A087WUC6;E9PI68;Q15005	0.089011	0	0.0339871	0.054841	0.18869	0.370334	0.381626	0.633374	0.679927	0.647255	0.805786	1	0.649123	0.650366
A0A087WUD3;Q9NRP0;Q9NRP0-2
A0A087WUE2	0.354532	0.681813	1	0	0.224705	0.250913	0	0	0	0	0	0	0	0
A0A087WUE4;A0A0G2JNN3;C9JMY0;Q96PV6;Q96PV6-1	0	0	0	0	0	0.148291	0	0.0512836	0.0897361	0	0.0383769	0	0	1
A0A087WUE6;A4PB68;Q3T8J9;Q3T8J9-2;Q3T8J9-3;Q9H869;Q9H869-2;Q9H869-3;Q9H869-4;Q9H869-5;Q9H869-6;Q9H869-7;Q9H869-8;Q9H869-9	0	0	0	0	1	0	0	0	0	0	0	0	0	0
A0A087WUI6;Q8WXW3	0	0	0	0	0.15068	0.432629	0.108375	0.370817	1	0.491208	0	0.602881	0	0
A0A087WUJ1;Q9H400;Q9H400-2	0	0.498143	0.261711	0.0958421	0.280351	0.204761	0.290653	0.460479	0.487134	1	0.900124	0.487646	0.410342	0.768961
A0A087WUJ4;Q92618
A0A087WUK2;O14979;O14979-2;O14979-3	0	0	0.0943634	0.473484	0.500871	0.24391	0.398353	0.363422	0.416882	0.49196	0.470938	1	0.603663	0.914561
A0A087WUL2	0	0.549856	1	0.70097	0.577629	0	0	0	0	0	0	0	0	0
A0A087WUL4;A0A087WX23;A0A087WZG9;B4DSP0	0.624905	0	1	0.9104	0.564763	0	0.570802	0	0	0	0	0	0	0
A0A087WUM5;Q5VZR0;Q9H4G4	0	0	0	0	0	0	0.371713	0.43461	0.54044	1	0.541605	0	0	0.898872
A0A087WUQ6;P07203	0.415428	0.94407	0.36668	0.273219	0.206979	0.132358	0.0900464	0	0.00138138	0.050178	0.606821	1	0.522208	0.476357
A0A087WUT0;A0A0A0MR39	0.254235	0	0	0.081926	0.137359	0.202064	0.17398	0.185534	0.227002	0.142196	0.135993	0.276256	0.440198	1
A0A087WUT6;O60841	0	0.324213	0.694959	0.883895	1	0.599537	0.640759	0.426746	0.613853	0.414114	0.169208	0.291837	0.741301	0.999436
A0A087WUU8;M0R3J2	0	0	0	0	0	0	0	0	0	0	0.513119	1	0.407022	0
A0A087WUV9
A0A087WUW9;Q9NXU5	0.795609	0.956483	0.599984	0.516523	0.531424	0.31559	0.47525	0.513827	0.319927	0.621853	0	0	0.280622	1
A0A087WUZ7;Q9Y5W8;Q9Y5W8-2	0	0	0	0.338234	0.416251	0.270363	0.452899	0.805449	0.868576	1	0.681623	0.816995	0.802761	0.815518
A0A087WV01	0	0.132265	0.475928	0.767186	0.52283	0	0.233624	0.32693	0	0.28899	0.615144	1	0.7158	0.387545
A0A087WV05;Q99417	0.632783	0.934119	0.759941	0.810218	1	0.423085	0.309299	0	0.171219	0.161623	0.220166	0.227144	0.0189761	0.186402
A0A087WV24;P20711;P20711-3	0.76805	1	0.607113	0.374341	0.239755	0.177296	0.127575	0.0867718	0.0670906	0.0863051	0.0217845	0	0.0234327	0.0400909
A0A087WV25;O95684;O95684-2	0.891488	0	0.535543	0.864483	1	0	0	0	0	0	0	0	0	0
A0A087WV39;Q92698;V9GYD3	0	0	0	0	0.25256	0	0	0	0	0	0.284928	0	0	1
A0A087WV96	0	0	0	0	0	0	0	1	0	0	0	0	0	0
A0A087WV97;Q8WU79;Q8WU79-2;Q8WU79-3	0.936229	1	0.530936	0.58461	0.470076	0.346136	0.338127	0.272766	0.292116	0.197968	0.086469	0.148682	0	0.208749
A0A087WVA1;P62341	0.07698	0	0	0.0773125	0.304852	0.514259	0.765202	1	0.937836	0.731494	0.743828	0.897615	0.498478	0.307839
A0A087WVA8;Q8IWB9;Q8IWB9-2	0.752583	1	0.406616	0.157188	0	0.0721134	0.0658427	0.0427624	0.234209	0.179215	0.246077	0.0291329	0.0307082	0.166027
A0A087WVC1;Q9BQ39	0.308115	0	0	0	0.138887	0.195535	0.132405	0.178755	0.173012	0.175643	0.371464	0.57443	0.452763	1
A0A087WVE2;O00602
A0A087WVF1;K7EQH1;Q96B23;Q96B23-2
A0A087WVF7;Q9NZM3;Q9NZM3-2	0.549606	0.403739	1	0.315518	0.19906	0.395685	0.212864	0.516691	0.410198	0.325742	0.469834	0	0.261819	0.706013
A0A087WVI0;E9PBL8;Q8WTW3	0.642448	1	0.833058	0.597942	0.537629	0.461052	0.420224	0.331495	0.484322	0.148033	0.160895	0	0.120005	0.0481484
A0A087WVM1;P78382;P78382-2;Q5W1L7	0	0	0	0	0.414355	1	0.107952	0	0	0	0	0	0	0
A0A087WVM4;B7ZM99	1	0	0	0	0	0	0	0.0192016	0.0478937	0.444848	0.784607	0.846373	0.53968	0.351623
A0A087WVP7;P0C024;P0C024-2	0.658238	0.623384	0.421946	0.400809	0.304405	0.0436101	0	0.0900279	0.184918	0.307318	0.826215	0.561758	1	0.221361
A0A087WVQ6;Q00610;Q00610-2	0	0.162638	0.229044	0.669398	0.662004	0.71917	0.516352	0.707121	0.970848	0.752482	0.7142	0.66989	0.26111	1
A0A087WVS8;Q70IA6;Q70IA6-3	0.750931	1	0.58132	0.587804	0.309046	0.338093	0.212927	0.242072	0.191255	0	0	0	0	0
A0A087WVT6;A0A087X159;D6RAC5;P81877;P81877-2;P81877-3;P81877-4;P81877-5;Q9BWW4;Q9BWW4-2;Q9BWW4-3	0	0	0	0	0	0.202575	1	0	0	0.0630674	0	0	0	0.490635
A0A087WVT8;A0A087X1L3;Q6ZWJ8	0	0	0	0	0	0	0	0	0	0	1	0	0	0
A0A087WVX4;P49895;P49895-2;P49895-4	0.341822	0	0.126178	0.134681	0.315256	0.827364	0.873428	1	0.826301	0.57723	0.428286	0.462977	0.269606	0.345061
A0A087WVX5;A0A1B0GTA9;A0A1B0GTF6;A0A1B0GTN8;A0A1B0GTP5;A0A1B0GTS4;A0A1B0GTX2;A0A1B0GU53;A0A1B0GUI8;A0A1B0GUK4;A0A1B0GVB2;A0A1B0GWF9;A0A1C7CYX2;A0A2R8Y555;A0A2U3TZM7;A0A494C0B2;A0A494C0Z9;A0A494C184;E7EN11;F8VNV8;F8VU10;F8VUW8;H0Y476;O00305;O00305-2;O00305-3;O00305-4;P54284;P54284-2;P54284-3;P54284-4;P54284-5;Q02641;Q02641-2;Q02641-3;Q08289;Q08289-10;Q08289-2;Q08289-3;Q08289-4;Q08289-5;Q08289-6;Q0…	0.141073	0	0	0.135476	0.246126	0	0.415406	0.899199	1	0.514626	0.431274	0.330542	0.652451	0.57944
A0A087WVZ7;A0A087X068;Q9UJW7;Q9UJW7-2	0	0	0	0	0	0.159563	0	0	1	0	0	0	0.328288	0
A0A087WVZ9;A0A0A0MQR7;P19388	0	0	0	0	0.31896	0	0.322232	0	0.356804	0.111511	0	0	0	1
A0A087WW06;B0QYP5;Q96AY4	0.5377	1	0.82704	0.659975	0.627395	0.468221	0.268443	0.395203	0.197785	0.364913	0	0	0	0
A0A087WW23;P20292	0.104201	0	0	0	0.032318	0.0718747	0.0494866	0.176391	0.203523	0.266849	0.323268	0.350039	0.160246	1
A0A087WW28	0	0	1	0	0.503766	0	0	0.110215	0.529214	0	0	0	0	0
A0A087WW48;E7ET14;H0Y3N9;H0Y589;O75151;Q9UPP1;Q9UPP1-2;Q9UPP1-3;Q9UPP1-4;Q9UPP1-5	0	0	0	1	0	0	0	0	0	0	0	0	0	0
A0A087WW58;Q9C0D9	0	0	0	0	0	0.431659	0	0	1	0	0	0	0	0
A0A087WW59;Q7Z7L8	0.44979	1	0.435677	0.353841	0.373572	0.185433	0.197018	0.0672837	0	0	0	0	0	0
A0A087WW66;Q99460;Q99460-2	0.311802	0.442295	1	0.822826	0.386017	0.323045	0.248047	0.195171	0.175839	0.0608189	0	0.000312999	0.00076109	0.00545317
A0A087WW76;A0A1B0GTZ9;A0A1B0GV73;A0A452Q6Z5;H0Y468;Q5T5U3	0	0	0	0	0	0	0	0	0	0	0	0	1	0
A0A087WW77;Q15334	0.638704	0.212723	0.831433	1	0.438338	0.440192	0.581754	0.474947	0.615658	0.52185	0.415082	0	0	0.515356
A0A087WWA3;O60333;O60333-2;O60333-4;Q4R9M9	0.662707	1	0.790387	0.691569	0.433305	0.414181	0.4018	0.322443	0.289631	0.196781	0.0990236	0.0689345	0.133827	0
A0A087WWA7;O14640;O14640-2;P54792;P54792-2	0	0	0	0	0	0.955915	0	1	0.543913	0	0	0	0	0
A0A087WWF6;F8W8R3;P49005	0.365815	1	0.826296	0.530746	0.198643	0.480711	0.491759	0.419124	0.399244	0.713779	0.493099	0	0.181994	0.796564
A0A087WWG5	0.0648672	0	0.0955874	0.0958475	0.253464	0.667471	0.59686	0.977871	1	0.876636	0.534737	0.406834	0.614297	0.445776
A0A087WWH3;Q9NZM4;Q9NZM4-2	0	0	0	0	0	0	0	0	0	0	0	0	0	1
A0A087WWI0	0.599457	1	0.761354	0.566304	0.476405	0.300292	0.382228	0.029339	0.109673	0.110335	0.190249	0.0629481	0	0.283073
A0A087WWM0;O43617	1	0.672114	0.958177	0.822899	0.883154	0.734394	0.560233	0.304237	0.199522	0.269264	0.142669	0	0.29363	0.174865
A0A087WWM4;H0YNJ6;Q9P2T1;Q9P2T1-2	0.629479	1	0.948971	0.668986	0.419506	0.323154	0.205511	0.118762	0.140626	0.103489	0.0291308	0	0.0172495	0.0193836
A0A087WWM6;E7EQL6;O43272;O43272-1;O43272-2	0	0	0	0	0	0	0	0	0	0.494848	0.770622	1	0.418689	0.555391
A0A087WWP4;A0A494C001;A0A499FJY3;Q96T37;Q96T37-2;Q96T37-3;Q96T37-4	0	0	0.134668	0.104939	0.137963	0.142456	0.147368	0.175831	0.213745	0.262631	0.287521	0.296672	0.520374	1
A0A087WWP5;Q12962	0	0	0	0	0	0	0	0	0	0	0	0	0	1
A0A087WWP8;A0A0C4DGT8;A0A0C4DH79;Q5VWQ0;Q5VWQ0-4	0	0	0	0	0	0	0	0	0	0.00851956	1	0	0	0
A0A087WWQ2;Q92979;V9GYP5	0	0	0	0	0	0	0	0.0531473	0	0	0	0.168973	0.128927	1
A0A087WWR2;H3BQI4;H3BQS2;I3L2Z5;P56270;P56270-2;P56270-3;P56270-4	0	0	0	1	0	0.290966	0	0.620178	0	0	0	0	0	0
A0A087WWS1;Q96FV9	0	0	0	0	0.0439771	0.180667	0.230531	0.18116	0.340067	0.157586	0.456088	0.237238	0.290399	1
A0A087WWT7;A0A1W2PRP3;Q7Z7M1	0	0	0	0	0	0	0	0	1	0	0	0	0	0
A0A087WWU8	0	0	0	0.38654	0.731875	0	1	0	0	0	0	0	0	0
A0A087WWW9;O95999	0.989516	1	0.870064	0.757089	0.64072	0.481567	0.420947	0.218528	0.283016	0.192704	0	0	0.110615	0
A0A087WWY0;P08519	1	0.878626	0.486239	0.239179	0	0.299855	0.688891	0.822124	0.404988	0.262831	0.345519	0.656432	0.241036	0.0656626
A0A087WX02;F8WB74;M0QYX1;P63302	1	0	0	0	0	0	0	0	0	0	0	0	0	0
A0A087WX10;G3V4M2;G3V5E8;P54803	0.0952471	0	0.0167022	0.117345	0.0630677	0.102613	0.162294	0.183561	0.319607	0.351947	0.609889	0.660104	0.479735	1
A0A087WX11;J3KNG8;Q8TF40;Q8TF40-3
A0A087WX19;A0A087WX45;C9J5R6	0	0	0	0	0.12132	0.141204	0.12632	0.11614	0.145092	0.132306	0.793026	1	0.779726	0.719564
A0A087WX80;A0A087WYF1;P24043	0.10947	0.188977	0.196995	0.113375	0.0309028	0.0323131	0	0.0263732	0.0887835	0.197012	0.281518	0.393175	0.230312	1
A0A087WX97;Q9BXK5	0.806339	1	0.33796	0.355085	0.0761153	0.0797706	0.128222	0.165427	0	0.198102	0.861656	0.93649	0.239392	0.266552
A0A087WX99;A0A0G2JRA4;P55283;P55283-2	0	0	0	0	0	0	0	0	1	0	0	0	0	0
A0A087WXB0;O15126	0.190715	0	0.368067	0.652364	0.681176	1	0.719527	0.580407	0.814104	0.603499	0.418966	0.391373	0.285961	0.597232
A0A087WXB8;C9J0E2;C9J480;C9JWJ3;C9JXM2;Q9Y274	0	0	0	0	0	0	0.455338	1	0	0	0	0	0	0
A0A087WXC5;E7ESZ7;O95299	0.0318846	0.00868661	0.0298218	0.0227298	0	0.00549911	0.0787497	0.1071	0.220169	0.268937	0.702903	1	0.405141	0.464227
A0A087WXD1;Q96T83	0	0	0	0	0	0.424974	0.455006	0	0	1	0	0	0	0
A0A087WXI2;Q9Y6R7	0.323114	0	0.0801771	0	0	0	0	0	0.134302	0	1	0	0.417788	0
A0A087WXI5;P12830;P12830-2	0.25061	0.277915	0.0827915	0.236136	0.122546	0	0.0331094	0.334042	0.538529	0.910022	0.607095	0.420868	0.477674	1
A0A087WXK4;Q7Z3F1	0	0	0	0.0314056	0.0883077	0.402325	0.82342	0.536394	1	0.506977	0.264532	0.191349	0.264967	0
A0A087WXL6;B7Z879;Q9H270	0.0604301	0.0131391	0.316025	0.495866	0.649835	0.779519	0.607146	0.814456	0.725217	1	0.507243	0	0.284377	0.649338
A0A087WXM6;A0A0A6YYL6;J3KRX5;J3QQT2;P18621;P18621-3	0.0246727	0	0.0521009	0.0960434	0.238654	0.240507	0.422089	0.358875	0.59209	0.472321	0.785104	1	0.912602	0.612405
A0A087WXN9;Q765P7	0.699579	1	0.50129	0.36986	0.277432	0.265857	0.181308	0.263404	0.129569	0.0946501	0	0	0	0.305475
A0A087WXS6;C9JBF1	0	1	0	0	0	0	0	0	0	0	0	0	0	0
A0A087WXU0;A0A2R8Y4J4;Q9NWS8;Q9NWS8-2	0.0221395	0	0	0	0.0157554	0.0452749	0.0972501	0.104165	0.178018	0.338073	0.681767	1	0.413242	0.577437
A0A087WXV4;P41235;P41235-2;P41235-4;P41235-5;P41235-6	0	0	0	0	0	0	0	0	0	0	0	0	0	1
A0A087WXW3;Q9Y3P8
A0A087WXW6;A0A140TA70;A0A140TA74;A9JR48;Q9BXA9;Q9BXA9-2;Q9BXA9-3;Q9BXA9-4	0.172663	0	0.76777	1	0	0	0	0	0	0.0873076	0	0	0	0.509919
A0A087WY00;F8W6H6;F8WE88;G3V394;Q9Y4I1;Q9Y4I1-2;Q9Y4I1-3	0	0	0	0	0	0	0	0	0.409911	0	0	0	0	1
A0A087WY55;Q9NP79	0.74417	1	0.447512	0.34827	0.230431	0.234234	0.230719	0.179792	0.122201	0.0758924	0.0670307	0	0.00672522	0.0460221
A0A087WY67;P0CG29;P0CG30;Q6ICJ4	0.690093	1	0.548938	0.371671	0.247917	0.2546	0.142096	0.0942619	0.0683588	0	0	0	0	0
A0A087WY71;Q96CW1;Q96CW1-2	0.0685122	0	0.0485639	0.0494051	0.0400596	0.0589476	0.133028	0.313836	0.423479	0.591213	0.820815	0.565127	0.229595	1
A0A087WY85;A0A0A0MQU3;D6RAH7;D6RFM0;H9KV45;P61077;P61077-2;P61077-3;P62837;P62837-2	0.354381	0.327919	0	0	1	0	0.293721	0.49584	0	0.287026	0	0	0	0
A0A087WYD6;A0A0G2JLV0;Q03519;X5CMH5	0.0866347	0	0	0	0.305022	0.531999	0.549042	0.921047	0.855723	0.844479	0.795611	0.954289	0.720128	1
A0A087WYF7;Q6UXV4	0.0595251	0	0	0	0.0186668	0.0710736	0.125229	0.391625	0.435179	0.4663	0.857215	1	0.82064	0.642715
A0A087WYJ2;M0QZR8;M0R2B7;P28340	0	0	0	0	1	0	0	0	0	0	0.193942	0	0	0
A0A087WYL3;Q17R60	0	0	0	0	0	0	0	0	0	0	0	0.806506	1	0
A0A087WYL6;A0A087WZG6;A0A087X1S9;Q8TEW8;Q8TEW8-2;Q8TEW8-3;Q8TEW8-5;Q8TEW8-6;R4GN62	0	0	0	0	0	0	0	0	1	0	0	0	0	0
A0A087WYM3;A0A0A0MRF5;E7EWX6;Q8IXJ6;Q8IXJ6-2;Q8IXJ6-3;Q8IXJ6-4	1	0.965688	0.498592	0.721764	0.593052	0.300172	0.326927	0.344967	0.399656	0.441293	0.357587	0.493534	0.299625	0
A0A087WYN9;Q7Z478	0.153335	1	0.0303263	0	0.0730356	0.202572	0.271376	0.231005	0.397448	0.428814	0.430195	0.617035	0.486598	0.442324
A0A087WYP2;Q8IZQ5	0.652719	1	0.696745	0.471259	0.641421	0.47803	0.409511	0.296482	0.204941	0.299396	0	0	0.149974	0.35736
A0A087WYR0;P09132	0	0	0.132116	0.127082	0.347891	0.38498	0.693142	0.624569	1	0.607076	0.456909	0.338815	0.710857	0.206251
A0A087WYS3;Q9ULU4;Q9ULU4-10;Q9ULU4-11;Q9ULU4-12;Q9ULU4-13;Q9ULU4-19;Q9ULU4-22;Q9ULU4-7;Q9ULU4-8;Q9ULU4-9	0.913885	1	0.805707	0.611716	0.239777	0.243365	0.156094	0.0843572	0.0757205	0	0.00403068	0.0134703	0.00221407	0
A0A087WYT3;Q15185;Q15185-4	1	0.170689	0.208932	0.967743	0.514721	0.299282	0.0928151	0.152944	0.0905995	0.170766	0.191309	0	0.0933354	0.0140239
A0A087WYV9;A0A087X1F5;P57105	0.0571906	0	0.0621384	0.0862192	0.112183	0.0989995	0.149793	0.152995	0.263541	0.56193	0.972798	1	0.893405	0.781032
A0A087WYX8;A0A1W2PQW0;A0A590UJL7;A0A5F9ZH12;A0A5F9ZHT2;A0A6Q8PH73;Q14CM0	0	0	0	0	0	0	0	0.780906	1	0	0	0	0	0
A0A087WYY0;A0A087X260;B1AKP7;G3V162;Q13148	0.00633181	0.277363	0.148568	0.113209	0.110201	0.0970257	0.204939	0.169582	0.0872054	0.124451	0	0.134717	0.361641	1
A0A087WZ13;E9PAU2;Q8IY67;Q8IY67-2	0.759383	1	0.493541	0.29988	0	0.351817	0.0590181	0	0	0	0	0	0	0
A0A087WZ32;A8K727;Q9HB19	0.874433	1	0.604801	0.509727	0.263911	0.151087	0	0	0	0	0	0	0	0
A0A087WZ40;Q14244;Q14244-6;Q14244-7	0.567457	1	0.350142	0.316051	0.283685	0.202328	0.163899	0.0441836	0.115063	0.072856	0.007435	0.0161393	0	0.126826
A0A087WZ50;Q8TCT7;Q8TCT7-2;Q8TCT7-4	0.457631	0	1	0.546824	0.122493	0.125586	0.085555	0	0	0	0	0	0	0
A0A087WZ62;Q9H6U8;Q9H6U8-3	0	0	0	0	0.0777567	0.0493116	0.541943	0.610485	1	0.204549	0.215211	0.214545	0.0726829	0.610606
A0A087WZ97;A0A087WZK6;A0A087X2C2;Q5T7M9	0	0	0	0	0.315714	1	0.544529	0.839318	0.570265	0	0	0	0	0
A0A087WZB5	0.372374	0.20003	0.0936803	0.277571	0.207349	0.123862	0	0.0530238	0.342673	0.567584	0.536294	0.423539	0.757323	1
A0A087WZC2;A0A0C4DGS8;E0YMJ8;P35680;P35680-2;P35680-3;P35680-4	0	0	0	0	0.276221	0	0	0	0.441845	0	0	0	0	1
A0A087WZE9	0.045145	0	0	0	0	0	0	0	0	0	0	0	0.0553146	1
A0A087WZG4;A0A3B3IPE9;A0A590UK10;Q6ZSZ5;Q6ZSZ5-1;Q6ZSZ5-2;Q6ZSZ5-5;Q6ZSZ5-6	1	0.722159	0.56457	0.40966	0.367941	0.346368	0.425278	0	0.388228	0.274997	0	0	0.318428	0.218425
A0A087WZK9;B3KS98;O15372	0.0222208	0	1	0.981461	0.715313	0.741265	0.552829	0.53547	0.605034	0.439844	0.320568	0.304476	0.249055	0.293855
A0A087WZM2;D6REQ6;D6RHI9;O00584	0	0	0	0	0	0.10574	0.23574	0.367523	0.512489	1	0	0	0	0.792875
A0A087WZM8;Q8TBM7;Q8TBM7-2;Q8TBM7-3	0	0	0	0	0.245394	0.686522	0.53982	1	0.600038	0.459869	0.319299	0	0.251479	0
A0A087WZN1;O43837	0.0417088	0.081433	0.0715057	0.0391662	0.00452616	0	0.0101763	0.00285274	0.0392918	0.213122	0.729642	1	0.746114	0.539012
A0A087WZP9	0	0	0	0	0	0	0.985026	0.796768	0.60453	0.246282	0	0	0.531744	1
A0A087WZQ7;Q9H115	0	0	0	0	0	0.834538	0	1	0	0	0	0	0	0
A0A087WZT0;M0QY61;M0QZ22;M0R0X3;Q5PRF9	0	0	0	0	1	0.976617	0.175859	0.783415	0	0	0	0	0	0
A0A087WZT2;Q6UX53	0.560261	0	0.020002	0.0944091	0.458854	0.54853	0.746094	1	0.717785	0.450983	0.480755	0.347404	0.288008	0.166972
A0A087WZT3;Q9H3K6
A0A087WZU2;E5RGN0;Q00536;Q00536-2;Q00536-3	0.94805	1	0.780817	0.425737	0.532779	0.291808	0.164082	0.356176	0.301118	0.10863	0	0	0	0.192692
A0A087WZU5;O43657
A0A087WZV0;O43314	0.549535	1	0.641919	0.63699	0.281798	0.258888	0.187259	0.172241	0.22487	0.184859	0	0.13247	0.171806	0.14368
A0A087WZY5;A8MXH5;F5H3Q5;F5H851;Q14031;Q14031-2	0	0	0	0.110253	0.508444	0.662157	1	0.536715	0.638067	0.787938	0.29669	0.513319	0.485572	0.323246
A0A087X011;E9PES4;J3KPF9;Q9Y496	0.41091	1	0.82336	0.64242	0.520016	0.46347	0.502223	0.463768	0.38948	0.337183	0	0	0.25107	0
A0A087X020;Q9Y3A5	0	0.114848	0.172897	0.426591	0.578608	0.790957	1	0.717646	0.878659	0.585266	0.510029	0.686926	0.700629	0.528885
A0A087X080;A0A0U1RRH1;A0A0X1KG73;Q15413;Q15413-2;Q15413-3	0	0	0	1	0	0	0.833155	0	0.561668	0	0	0	0	0
A0A087X091	0	0	0	0	1	0	0	0	0	0	0	0	0	0
A0A087X0D5;P09668	0.186314	0.052477	0.0267323	0	0.0226557	0.126104	0.251766	0.509853	0.801821	0.564544	0.815342	0.656078	0.681391	1
A0A087X0F1;Q9UK61;Q9UK61-2;Q9UK61-3;Q9UK61-4	0	0	0	0	0	0	0	0	0	0	0	0	0.339858	1
A0A087X0H8;Q15714;Q15714-2;Q15714-3	0.0900053	0.710427	1	0.377949	0.19178	0.109234	0.268336	0	0.0537004	0	0	0	0	0
A0A087X0H9;Q5T8P6	0.353332	0.304869	1	0.43684	0.480143	0.391499	0.174453	0.27921	0.303893	0.221554	0	0.62623	0.771813	0.996798
A0A087X0K0;P39059	0	0	0	0	0	0	0	0	0	0	0	0	0	1
A0A087X0K4;Q7Z408;Q7Z408-2;Q7Z408-4	0	0	0	0	0	0	0	0	1	0	0.527625	0	0.251269	0.706034
A0A087X0K9	0	0	0	0	0	0	0	0.300374	0.420707	0.712561	0	0	0	1
A0A087X0L7;E7EVY0;J3KNA0;Q15070;Q15070-2	0.0205875	0	0	0	0.0264781	0.0511577	0.0750814	0.131444	0.292768	0.232339	0.75555	1	0.487011	0.558745
A0A087X0M4;Q9BWU0	0.466211	0.936289	1	0.829013	0.381437	0.362606	0.252905	0.0259213	0.114561	0.0483089	0	0.0143402	0.0484389	0.580843
A0A087X0P0	0	0	0	0	0	0	0	0	0	0.0424367	0	0	1	0.661616
A0A087X0Q9;Q9BVL4	0.707343	1	0.604184	0.297811	0.130058	0.142718	0.0663186	0.0361737	0	0.03072	0.309039	0.555	0.314948	0.308907
A0A087X0R6;Q9UMY4;Q9UMY4-1	0.663458	1	0.607961	0.540713	0.390651	0.230867	0.367359	0.135675	0.123645	0.0766997	0.0701582	0	0.0705707	0.0113987
A0A087X0R7;Q9H4L4	0.224633	0	0	0	0	0.207217	0	0	0	0	0	0	0	1
A0A087X0R9;B8ZZK1;Q07837;Q07837-2;Q07837-5;Q07837-6;Q07837-7	0	0	0	0	0	0	0	0.66947	1	0	0	0.532464	0	0.288815
A0A087X0S5;P12109	0.305075	0	0.00231147	0.159172	0.0612771	0.127468	0.200922	0.214089	0.211978	0.331618	0.31604	0.394588	0.171264	1
A0A087X0T5;Q96AB6	0	0	1	0	0	0	0	0	0	0	0	0	0	0
A0A087X0V5;P29728;P29728-2	0.443739	0.271875	0.350745	0	0.0137593	0.207079	0.274733	0.650214	1	0.582878	0.457705	0.471779	0.288983	0.312803
A0A087X0W8;Q04206;Q04206-2;Q04206-3;Q04206-4;Q2TAM5	0.88093	1	0.616122	0.433698	0.256516	0.221247	0.17306	0.0946602	0.0665307	0.0468261	0.0481279	0	0.0360927	0.0526603
A0A087X0W9;Q8N6M0	0.340623	0.301001	0.895117	1	0.772888	0.573415	0.529445	0.335878	0.446838	0.119438	0.151817	0	0.125528	0
A0A087X0X3;P52272;P52272-2	0.0158866	0	0.0225635	0.0594109	0.155532	0.16764	0.200333	0.192805	0.196613	0.198482	0.295318	0.516693	0.381824	1
A0A087X0Y2;A0A087X248;A0A087X2I9;A0A096LPD8;F5GWV3;F5H3N7;F5H8B4;O14607;O14607-2;O14607-3;O14607-4;O14607-5	0	0	0	0	0	0	0.116126	0	0	0	0	0	0	1
A0A087X108	0.425003	1	0.683031	0.744209	0.390681	0.207757	0.168518	0.0536691	0.131521	0.0469596	0.0153713	0	0.00346273	0.00823181
A0A087X117;A0A0G2JN29;Q15155	0	0	0	0	0.0263516	0.147519	0.409634	0.378955	0.727947	0.535619	0.556738	1	0.80105	0.36621
A0A087X138;Q8TF71	0	0	0	0	0	0	0.366561	0.482533	1	0.776643	0	0	0	0
A0A087X1A8;A0A2R8Y3X7;D3VVH9;F5H211;G3V3R7;P54252;P54252-1;P54252-4	0.604904	1	0.427415	0.404064	0.209621	0.211376	0.165954	0.164929	0.0799932	0	0	0	0	0
A0A087X1B2	0.101805	0	0.0725999	0.125011	0.144662	0.128802	0.109417	0.1029	0.143085	0.0933346	0.211609	0.225769	0.214856	1
A0A087X1B6;E9PEG3;F5GZG9;P10275;P10275-3;P10275-4	0	1	0	0	0	0	0	0	0	0	0	0	0	0
A0A087X1E4;P53365;P53365-3	0.402613	0.983826	0.218152	1	0.604331	0.348037	0.168463	0.040107	0.0816241	0.0617639	0.00692413	0	0	0
A0A087X1G1;H7BYD0;Q16718;Q16718-2	0.0190596	0	0.00828371	0.00809974	0.0113996	0.0295032	0.06527	0.0935417	0.146719	0.376576	0.697846	1	0.692318	0.681921
A0A087X1G4	0	0	0	1	0	0	0	0	0	0	0	0	0	0
A0A087X1J2	0	0	0	0	0	0	0	0	0	0.286985	0.826454	1	0.46348	0.321469
A0A087X1J7;P22352	0.174319	1	0	0.159172	0.130672	0.219298	0	0.249272	0	0.717458	0.380612	0.67405	0.776408	0.736827
A0A087X1K1;Q96C00
A0A087X1N3;F8WC38;O75818;O75818-2
A0A087X1N7;P20929;P20929-2;P20929-3;P20929-4
A0A087X1P3;C9IYE1;F8W8P5;H7BYR4;Q86UW7;Q86UW7-2;Q86UW7-3	0	0	0	0	1	0	0	0	0	0	0	0	0	0
A0A087X1P5;J3KQ41;J3QT95;Q9H9Q2;Q9H9Q2-3	1	0.833845	0.785192	0.86023	0.664812	0.345442	0.311265	0.239493	0.153026	0.49338	0	0	0	0.328948
A0A087X1R3;A0A0C4DGX0;A6QL64;Q8N2N9	0.714097	1	0.768413	0.676782	0.501063	0.334033	0.334243	0.308657	0.333194	0.105298	0	0	0.339161	0
A0A087X1S3
A0A087X1W8;A0A0A0MTJ8;Q9BY67;Q9BY67-3;Q9BY67-4;Q9BY67-5;X5DQS5	0	0	0	0	0	0.220521	0.405048	0.431249	0.432685	0.662433	0.614923	1	0.423695	0.785505
A0A087X1Z1;A0A0G2JPW5;A0A0G2JQX1;A0A0G2JSA7;Q96RT8;Q96RT8-2
A0A087X1Z3;Q9UL46	0.569737	0.805162	1	0.782747	0.436201	0.259959	0.240729	0.14933	0.117442	0.118112	0.0272372	0	0.0560697	0.00395767
A0A087X236;A0A0A0MRE2;C9J2A8;Q9NVP4;Q9NVP4-2;Q9NVP4-3;Q9NVP4-4;Q9NVP4-5	0	0	0	0	0	0	0	0	0.0919291	0	0	1	0	0
A0A087X241;Q2NKQ1;Q2NKQ1-3;Q2NKQ1-4
A0A087X256;Q2M389	0.0543628	0	0.292759	0.36608	0.665892	0.982457	1	0.932399	0.968404	0.838557	0.629188	0.470063	0.515673	0.596136
A0A087X266;Q9BXJ8	0	0	0	0	0.375442	0.156345	0.836377	1	0.506009	0.457896	0.326924	0	0	0
A0A087X279;P09913	0.914023	0.978801	1	0.872832	0.273798	0.377673	0.310504	0.234845	0.197955	0.178263	0	0	0	0
A0A087X294;O75914;O75914-2;O75914-3;O75914-4	0.863485	1	0.644889	0.730898	0.510088	0.317208	0.341864	0.198006	0.177229	0.101706	0.0540847	0	0.0794911	0.0678595
A0A087X295;E9PDU5;Q9NNW5	0.453559	0.895046	1	0.293058	0.227817	0	0.181111	0.194288	0.256132	0	0	0	0	0
A0A087X296;P23219;P23219-2;P23219-3;P23219-4;P23219-5;P23219-6	0.0480154	0	0.0401442	0.0612848	0.0565579	0.155829	0.155433	0.319994	0.36858	0.509507	0.883205	0.680357	0.459201	1
A0A087X2A7;H0YBA5;H7BY63;Q8NB25;Q8NB25-2;Q8NB25-3;Q8NB25-4	0	0	0	0	1	0	0	0	0	0	0	0	0	0
A0A087X2B5;P35613;P35613-2	0.149275	0	0	0.050082	0.0787263	0.178536	0.286213	0.604871	0.645156	0.879053	0.834969	0.618141	0.253946	1
A0A087X2D5;Q9BRJ2	0	0	0	0	0.0279004	0	0.0611378	0.0484252	0.0556493	0.152704	0.346621	0.62371	0.355691	1
A0A087X2D8;O60271-2;O60271-4	0	1	0.276488	0.130053	0	0	0	0	0	0	0	0	0	0
A0A087X2G6;A0A0C4DGU5;D6RIC3;Q9Y3C1;Q9Y3C1-2;Q9Y3C1-3	0	0	0	0.0521879	0.22049	0.0803439	0.241449	0.260733	0.0925797	0.222016	0.544265	0.518533	0.441737	1
A0A087X2I1;P62333	0.328831	0.483397	1	0.953675	0.581209	0.426735	0.402138	0.217803	0.171041	0.0823138	0	0.0021203	0.0328625	0.0301702
A0A088AWN3;A0A0A0MSY4;Q9BZ29;Q9BZ29-3;Q9BZ29-4;Q9BZ29-5	0	0.207001	0	0.227994	0	0	0.297163	0.0596409	0.559663	0.251558	0.941309	1	0.716227	0.416076
A0A088AWN8;E7EP87;E9PH27;J3KS48;J3KT43;J3QRB0;Q9UHQ1;Q9UHQ1-2;Q9UHQ1-3;Q9UHQ1-4	1	0.784452	0	0.40909	0.362595	0	0	0	0	0	0	0	0	0
A0A090HNM7;A0A1W2PS85;P28715;R4GMW8	0.7587	0	0.698293	0.704862	1	0.192484	0.262976	0.307555	0.3443	0.889264	0	0	0.981984	0
A0A096LNH6;Q14185	0.0523375	0.0979073	0.0187614	0.254478	0.115881	0.108546	0.261636	0.237644	0.468405	0.260177	0	0.324735	0.0225223	1
A0A096LNV3;A0A096LP02;Q9Y508;Q9Y508-2	0	0	0	0	0	0.28323	0	0	1	0	0	0	0	0
A0A096LP07;A0A096LPJ3;A8K070
A0A096LP22;A0A096LP34;C9J7Z1;Q86Y79	0	0	0	0	0	0	0	0	0	0	0	0	0	1
A0A096LP69	0	0	0	0	0	0	1	0	0.195784	0	0	0	0	0.224329
A0A096LPC5;A0A0A0MR88;Q9Y4E1;Q9Y4E1-1;Q9Y4E1-2;Q9Y4E1-6	0	0	0	0	0.240691	1	0.837246	0.286381	0.183403	0	0	0	0	0
A0A096LPE2	0.726769	0	0.143864	0.0262832	0.255856	0.576486	1	0.774687	0.821855	0.572526	0.481851	0.576242	0.499057	0.474064
A0A096LPI6	0.101043	0.10433	0.0907272	0.0630226	0.0327407	0.00572213	0.013039	0	0.024092	0.157135	0.716655	1	0.757011	0.533109
A0A096LPJ4;P05161	0.751449	1	0.433127	0.351878	0.185128	0.112919	0.0254453	0.0519685	0.0384992	0	0.0943401	0.106081	0.063172	0.01398
A0A096LPJ9;A0A140G945;A0A140G945-2;E7EWH7;P02489	1	0	0.88827	0.627981	0	0	0	0	0.207137	0	0	0	0	0
A0A0A0MQR2;Q9BY42	0.938802	1	0.641378	0.525239	0.622176	0.345634	0.161641	0.167748	0.166184	0.172579	0	0.117904	0.204172	0.39265
A0A0A0MQR4;I3L2J0;Q96RK0	0.290434	1	0.256193	0.302404	0.159806	0	0.0675366	0.0519995	0	0	0	0	0.368269	0
A0A0A0MQS1;Q53H96;Q53H96-2	1	0.956879	0.486157	0.274793	0.381097	0.520698	0.233793	0.223291	0.168323	0.0919475	0.142404	0	0.153199	0
A0A0A0MQS9;A0A0A0MTC7;Q16363;Q16363-2	0	0	0	0	0	0	0	0	0	0	0.393669	0.947718	0	1
A0A0A0MQT0;P09455	0.987167	1	0.50092	0.529894	0.313818	0.216293	0.292818	0.108087	0.104162	0.137753	0.0575617	0	0.0431001	0.0155473
A0A0A0MQU0;Q9BV38;U3KQC1	0.0872862	0.178031	0.13712	0	0.0228797	0.0931841	0.0559597	0.0609515	0.108078	0.179965	0.154655	0.338549	0.147146	1
A0A0A0MQU4;Q96I15	0.761075	1	0.794984	0.621178	0.390495	0.276571	0.303206	0.169424	0.13999	0.106859	0.0492885	0	0.0486475	0.0111953
A0A0A0MQU7;A0A0A0MTK8;F5H0K0;P20823;P20823-2;P20823-3;P20823-7;U3KQS6	0.203888	0	0	0.333288	0.150127	0.126602	0.207478	0.1042	0.304046	0.0527679	0.260332	0.238094	0.838868	1
A0A0A0MQV6;P09038;P09038-1;P09038-2;P09038-3	0	0	0	0	0	0	0	0	0	0	0	0	0	1
A0A0A0MQX1;D6RGD1;Q9HD67	0	0	0	0	0	0	0	0	0.643299	1	0	0	0	0
A0A0A0MQX8;C9JP00;Q9NR56;Q9NR56-2;Q9NR56-5;Q9NR56-6;Q9NR56-7	0	0.0376516	0.0246689	0.27687	0.572624	1	0.734255	0.876713	0.485989	0.403808	0.107854	0.42684	0.846444	0.959708
A0A0A0MQY7;A0A3B3ISH2;Q5VU97	0.65271	1	0.887255	0.685635	0.477437	0.158193	0.29751	0.405976	0.536659	0.240912	0.244451	0.342187	0	0.343325
A0A0A0MR02;P45880;P45880-1;P45880-2	0.0358076	0	0.0380702	0.0456265	0.0616057	0.0729964	0.101116	0.1398	0.245452	0.517706	0.921069	1	0.47389	0.498352
A0A0A0MR03;A0A0J9YWB6;A0A0J9YWJ4;K7EJD2;Q9Y5B0;Q9Y5B0-4	0	1	0.250403	0	0.427784	0.127729	0	0	0.000508796	0	0	0	0	0
A0A0A0MR05;H3BM50;H3BN58;H3BPT1;H3BPU5;Q9BVC4;Q9BVC4-4;Q9BVC4-5	0	0	0.11163	0.388278	0.298688	0.329609	0.643279	0.173068	0.835372	1	0.379425	0	0.112963	0
A0A0A0MR07;F5H5P4;P15498;P15498-2;Q96D37	0.651432	1	0.857744	0.404651	0	0.237903	0	0.177074	0.155684	0	0.10937	0	0.0512967	0
A0A0A0MR09;P43378	0.864645	0.00784131	0.0275748	0.0185662	0.0307937	0.0340139	0.080943	0	0.100205	0.241745	0.131375	0.680261	0.375702	1
A0A0A0MR11;A0A0A0MRS1;Q06730;Q06730-2;Q06730-3
A0A0A0MR25;A0A5S6RJB7;D2CGD1;E7EVR7;H7BXU9;H7C265;P21802;P21802-15;P21802-16;P21802-17;P21802-18;P21802-2;P21802-20;P21802-21;P21802-22;P21802-23;P21802-3;P21802-4;P21802-5;P21802-6;P21802-8;S4R381
A0A0A0MR36;Q9ULV0-2
A0A0A0MR51;H7C2V0;O60427	0	0	0	0	0.122828	0.244827	0.322472	0.315936	0.407038	0.342309	1	0.663022	0.523251	0.328587
A0A0A0MR67;A0A0A0MSA1;E9PDI6;F5GY28;F5H522;Q13936;Q13936-10;Q13936-11;Q13936-12;Q13936-13;Q13936-14;Q13936-15;Q13936-16;Q13936-17;Q13936-18;Q13936-19;Q13936-2;Q13936-20;Q13936-21;Q13936-22;Q13936-23;Q13936-24;Q13936-25;Q13936-26;Q13936-27;Q13936-28;Q13936-29;Q13936-3;Q13936-30;Q13936-31;Q13936-32;Q13936-33;Q13936-34;Q13936-35;Q13936-36;Q13936-37;Q13936-4;Q13936-5;Q13936-6;Q13936-7;Q13936-8;Q13936…	1	0	0.665245	0	0	0.231021	0	0	0.50029	0.514341	0	0	0	0.208145
A0A0A0MR74;O75907	0	0	0	0.346466	0	0.19907	0.253265	0.301294	0.888283	0.460035	0.697362	0.294772	1	0.515627
A0A0A0MRA5;B7Z4B8;M0R3F1;Q9BUJ2;Q9BUJ2-2;Q9BUJ2-4	0.465709	1	0.842534	0.630649	0.376333	0.198229	0.0779161	0.134806	0	0.123202	0.130665	0.167731	0.280686	0.447325
A0A0A0MRA8;A8K968;Q9Y2J2;Q9Y2J2-2	0.296848	0.119959	0.137928	0.142105	0	0.017475	0.151542	0.425574	0.701636	0.650322	0.721414	0.527358	0.495652	1
A0A0A0MRB5;Q8WXG6;Q8WXG6-2;Q8WXG6-3;Q8WXG6-4;Q8WXG6-5;Q8WXG6-6;Q8WXG6-7;Q8WXG6-8	0.625453	1	0.709145	0.531696	0.830703	0.273743	0	0	0	0	0	0	0	0
A0A0A0MRD0;A0A2R8YCE3;F5H4B4;F5H4B4-2	0	0	0	0	0.303926	0	0.344864	0	1	0.765429	0	0	0	0
A0A0A0MRE5;Q9ULH1;Q9ULH1-2	0.632636	0.527803	0.400147	0.411462	0.21815	0.0848364	0.269158	0.168076	0.635044	0.43329	0.212197	0	0.270293	1
A0A0A0MRF6;Q99996;Q99996-1;Q99996-3;Q99996-5;Q99996-6	0.450692	0.898249	1	0.683741	0.450227	0.276735	0.135064	0.256353	0.0643553	0.0018517	0.752238	0	0.0153692	0.136542
A0A0A0MRF9;P16885	0.684954	1	0.633539	0.552352	0.352995	0.341015	0.271968	0.217143	0.200147	0.0870714	0	0	0	0.162499
A0A0A0MRG8;Q16611	0.0562186	0	0	0	0	0	0	0.233068	0.596198	0.595412	1	0.941174	0.947591	0.791707
A0A0A0MRH3;Q9Y2W7;Q9Y2W7-2;Q9Y2W7-3
A0A0A0MRI1;Q8IXQ4	0.232992	0.277016	0.0802335	0.140848	0.0959105	0.0578606	0.172326	0	0.0626979	0	0.283675	1	0.445049	0.0802172
A0A0A0MRI2;Q9UNH7	0.872328	1	0.892776	0.902999	0.730958	0.541434	0.44909	0.538683	0.265717	0.23612	0.0771764	0	0.178931	0.0286865
A0A0A0MRJ0;Q5VT25;Q5VT25-2;Q5VT25-3;Q5VT25-4;Q5VT25-5;Q5VT25-6	0	0	0	0	0	0	0	0	1	0	0	0	0	0
A0A0A0MRJ6	0.802182	1	0.697878	0.613379	0.360267	0.215811	0.221498	0.0699806	0.0492185	0.0581352	0.0313605	0.0327516	0.00509207	0
A0A0A0MRJ7;P12259	0.381746	0.136342	0.382032	0	0.0195809	0.450351	0.762645	1	0.816276	0.571497	0.362964	0.469237	0.259433	0.329509
A0A0A0MRM2;Q86VF7;Q86VF7-2;Q86VF7-3;Q86VF7-4	0	1	0	0	0.163526	0.321792	0	0	0	0	0	0	0	0
A0A0A0MRM9;Q14978;Q14978-2;Q14978-3	0.0998032	0.0888802	0.0443737	0.0287917	0.0462974	0.0244094	0.0288304	0.00344603	0	0.0324747	0.0413963	0.111587	0.131766	1
A0A0A0MRP6;B7ZLQ5;P28370;P28370-2	0	0	0	0	0	0	0	0.288947	0	0	0	0	0.115354	1
A0A0A0MRR7;P09234	0	0.0247497	0.219667	0.281435	0.330543	0.37711	0.345456	0.317087	0.215301	0.371022	0.358376	0.596018	0.782937	1
A0A0A0MRT2;Q9BTA9;Q9BTA9-2;Q9BTA9-5	0	0	0	0	1	0	0	0	0	0	0	0	0	0
A0A0A0MRT6;Q8IZP0;Q8IZP0-2;Q8IZP0-3;Q8IZP0-4;Q8IZP0-5;Q8IZP0-6;Q8IZP0-9	0.117446	0.321752	0	0.33912	0.542473	0.504763	1	0.636644	0.840718	0.617795	0.463657	0.178001	0.0374793	0.354661
A0A0A0MRW6;Q9H6R4;Q9H6R4-2;Q9H6R4-4	0	0	0	0	0	0	0	0	0	0	0	0.0951105	0	1
A0A0A0MRX1;A0A0R4J2E6;A0A494C0F8;A0A494C147;A0A494C1D9;B1APY9;P26378;P26378-1;P26378-2;P26378-3;P26378-4;P26378-5;Q12926;Q12926-2	0	0	0	0.382161	0	0.382216	0.519771	0.649351	0.950038	0.777327	0	0	0	1
A0A0A0MRX8;A0A1B0GWI9;A0A1B0GWJ4;A0A2R8Y7V8;O00712;O00712-4;O00712-5;Q5VW26;Q5VW27;Q5VW30;U3KQE8	0.0142403	0	0.0322865	0.0506576	0.0357847	0.0499424	0.019307	0.0671731	0.0669653	0.120263	0.156289	0.243017	0.145017	1
A0A0A0MRY0;B0QYI1;Q8WUA7;Q8WUA7-2;Q8WUA7-3;Q8WUA7-4	0.74505	1	0.807243	0.729841	0.446758	0.403135	0.389679	0.299141	0.192005	0.127224	0	0	0.13416	0
A0A0A0MRZ1;Q9H9P5-1;Q9H9P5-3	0	0	0	0	1	0	0	0	0	0	0	0	0	0
A0A0A0MRZ4;E7EMV7;Q15025;Q15025-2;Q15025-3;Q15025-4;Q15025-5;Q15025-6;Q15025-7;Q15025-8	0.649248	0	1	0.815678	0.786243	0.744081	0.775454	0	0.362058	0.75774	0	0	0	0
A0A0A0MS14	1	0	0	0.341995	0	0.358522	0	0	0	0	0	0	0	0
A0A0A0MS59;A0A0C4DFX4;Q6ZRS2;Q6ZRS2-2;Q6ZRS2-3	0	0	0	0	0	0	0	0	0	0	0	0	0	1
A0A0A0MS79;O14513	0	0	0	1	0.75105	0.597215	0.496281	0.504783	0	0	0.271001	0.32704	0.168028	0
A0A0A0MS87	0.776295	1	0.972789	0.506997	0.272582	0.220698	0.112921	0.109912	0.0699703	0.0179675	0.0231086	0	0.0188818	0.0289941
A0A0A0MS99;I3L4X2;P33527;P33527-2;P33527-3;P33527-5;P33527-9	0	0	0	0	0	0	0	0	0	0.325156	0	0	0	1
A0A0A0MSA9;A0A0C4DG49;P15151;P15151-2;P15151-3;P15151-4	0	0	0	0	0	0	0	1	0	0	0	0	0	0
A0A0A0MSB4;Q6ZN50;Q969R2;Q969R2-2;Q969R2-3;Q969R2-6
A0A0A0MSB8;Q9UPT5;Q9UPT5-1;Q9UPT5-2;Q9UPT5-5;Q9UPT5-6	0.157499	0.757865	0.532193	0.666226	0.485599	0.226186	0.350412	0.476261	1	0.562061	0.306019	0.0209194	0.466548	0
A0A0A0MSE3;D3DNG8;P30556	0	0	0	0	0	0.191102	0.389625	0.718582	1	0.70129	0	0	0	0.81949
A0A0A0MSG0;A6NGB9	0.227805	1	0	0	0.153537	0	0.377129	0.119801	0	0	0	0	0	0
A0A0A0MSH9;A0A494C1F7;A0A494C1P7;Q86WJ1;Q86WJ1-2;Q86WJ1-4	0	0	0	0.154223	0.19161	0.227544	0.297326	0.210445	0.332303	0.123341	0	0	0.314639	1
A0A0A0MSI2;B3KPJ4;Q8IXK0;Q8IXK0-2;Q8IXK0-3;Q8IXK0-4;Q8IXK0-5	0.608847	1	0.640009	0.553636	0.363513	0.197133	0.246245	0.151147	0.0827362	0.0617958	0.120537	0	0.0964189	0.0680829
A0A0A0MSI6;B7Z1P2;Q9H4M3;Q9H4M3-2
A0A0A0MSI8;O00471	0.466427	0.938571	0.496817	0.474917	0.498042	0.0712319	0	0.256714	0.431072	0.11003	0.435551	0.157066	1	0.521834
A0A0A0MSJ9;Q15283;Q15283-2	0.848844	0	0	0.676077	0	0	0	0	1	0	0	0	0	0
A0A0A0MSK3;A0A0C4DH47;A0A498U6I9;C9JS68;P24557;P24557-2;P24557-3;P24557-4;Q53F23	0	0	0	0	0	0.150355	0	0	0.361197	0	1	0	0.162391	0
A0A0A0MSK6;Q13017;Q13017-2	0.529146	1	0.435857	0.718849	0.302803	0.202724	0.524952	0.256362	0.636028	0.239136	0.417961	0	0.400715	0.620729
A0A0A0MSL1;Q8TDM6;Q8TDM6-2;Q8TDM6-3;Q8TDM6-4
A0A0A0MSM0	0	0	0.378358	0	0	0.718829	0	1	0.524314	0.381363	0	0.184593	0	0
A0A0A0MSP4;Q86WC4	0	0	0	0	0	0.244664	0.389291	0.164137	1	0.379511	0	0	0	0
A0A0A0MSQ0;P13797;P13797-2	0.916046	1	0.453329	0.322826	0.18735	0.0366502	0	0.0136297	0.22687	0.318484	0.298886	0.277598	0.35241	0.321918
A0A0A0MSS0;P60880	0	0	0	0	0	0.125981	0.595108	0.867929	1	0.609412	0.54298	0.58471	0.262019	0.369487
A0A0A0MSS8;P42330	0.747425	1	0.586784	0.43289	0.270313	0.187724	0.163762	0.0965959	0.0665932	0.0261132	0.0135575	0	0.00239751	0.01997
A0A0A0MST8;C9JRP1;E9PFN4;Q9Y6M7;Q9Y6M7-12;Q9Y6M7-13;Q9Y6M7-2;Q9Y6M7-6;Q9Y6M7-7;Q9Y6M7-8;Q9Y6M7-9	0	0	0	0	0	0	0	0.237312	0.819935	0.471628	1	0.536621	0	0.954563
A0A0A0MSU4;O94911-3	0.204349	0	0	0.157868	0.257876	0.438403	0.305404	0.718819	0.657872	0.873116	0.874173	0.877871	0.486595	1
A0A0A0MSV9;A0A0G2JH37;A0A0G2JKZ1;A2AB90;O15533;O15533-2;O15533-3	0	0	0	0	0.15349	0.432672	0.791011	1	0.910358	0.456472	0.462625	0.33416	0.332791	0.234825
A0A0A0MSW2;E9PEI2;Q9BQW3;Q9BQW3-1
A0A0A0MSX9;P41252	0.136179	0.184739	1	0.848834	0.352451	0.424261	0.2724	0.164572	0.141733	0.0932136	0.0435421	0.0132785	0.0656559	0
A0A0A0MSY7;O00142;O00142-4;O00142-6	0.170763	0.188526	0.10867	0.0813691	0.0380068	0	0.0390727	0.0677008	0.0648472	0.237171	0.740708	1	0.802794	0.472374
A0A0A0MSZ9;Q05048	0.177608	0.224967	0.116889	0.162465	0.174122	0.114185	0.131895	0.10026	0.174569	0	0.0780175	0.292767	0.219232	1
A0A0A0MT02;A2ABK4;P18615;P18615-3	0.733678	0.781274	0.90682	0.548685	0.851865	0.748289	1	0.854507	0.591544	0.604392	0	0	0.614395	0.512954
A0A0A0MT16;Q86UQ4;Q86UQ4-3;Q86UQ4-4	0	0	0	0	0	0	0	0	0.593366	0	1	0	0	0
A0A0A0MT32;P38571;P38571-2	0.095731	0.0825039	0.0537924	0	0.0874429	0.136236	0.216073	0.219525	1	0.42558	0.450513	0.487404	0.348435	0.640711
A0A0A0MT35;A0A2P0CTB1;Q8TBF2;Q8TBF2-3	0.917247	1	0.329594	0.260473	0.187004	0.0697818	0.0684973	0	0.0458306	0.320567	0.409351	0.686795	0.267094	0.0981886
A0A0A0MT61;G5E979;H7BYM2;Q8WYN0;Q8WYN0-3;Q8WYN0-5	1	0.576307	0.227902	0.155264	0.287788	0.321713	0.178654	0.157582	0	0.204501	0	0.354753	0.718061	0
A0A0A0MT72;C9JUH3;Q9BSQ5;Q9BSQ5-2;Q9BSQ5-3	0	0	1	0.967418	0.523342	0.425383	0.295141	0.1893	0.194968	0.195655	0	0	0	0
A0A0A0MT83;P26440	0.0837896	0.0859262	0.108562	0.0496814	0.0171424	0.00372085	0.00756139	0	0.0225683	0.0985938	0.68049	1	0.651023	0.414975
A0A0A0MT93
A0A0A0MTC2;D6RA37;D6RDV0;D6RIY7;Q13454;Q13454-2	0	0	0	0	0	0.318408	0.358448	0.380581	0.601885	0.441871	0.634472	1	0.529454	0.8931
A0A0A0MTG5;P13232;P13232-2;Q5FBX5	0.839854	0	0	0	0	0	1	0	0	0	0	0	0	0
A0A0A0MTH3	0.0799455	0.0934703	0	0.19411	0.280335	0.164511	0.409682	0.608331	0.630486	0.528421	0.979797	1	0.882538	0.445149
A0A0A0MTH9;O14981	0.291315	0.867571	0.573784	0.535295	0.215021	0.323327	0.158234	0.404248	0.259531	0	0	0	0	1
A0A0A0MTJ9;Q6PIU2;Q6PIU2-2	0	0	0	0.0427661	0.212025	0.282118	0.525099	0.454092	0.504904	0.72341	0.956733	1	0.757673	0.747859
A0A0A0MTK0;A0A0A0MTP0;F5GWB1;Q7Z6B0;Q7Z6B0-2	0.531953	1	0.815849	0.462481	0.436008	0.257214	0	0	0.117343	0	0	0	0	0
A0A0A0MTL6;Q6ZS17;Q6ZS17-2;Q6ZS17-3;Q6ZS17-4	0.788083	1	0.550131	0.409658	0.262883	0.203843	0	0.253504	0.529806	0.450671	0	0	0	0.149945
A0A0A0MTL7;A0A0D9SGH8;C6ZRJ6;C6ZRJ7;C6ZRK5;E2GH26;Q5JRY3;Q5JRY4;Q5JRY5;Q5VVR7;Q9NQB0;Q9NQB0-10;Q9NQB0-11;Q9NQB0-12;Q9NQB0-13;Q9NQB0-14;Q9NQB0-15;Q9NQB0-16;Q9NQB0-17;Q9NQB0-2;Q9NQB0-3;Q9NQB0-4;Q9NQB0-5;Q9NQB0-6;Q9NQB0-7;Q9NQB0-8;Q9NQB0-9	0	0	0	0	0.381711	0	0	0	0	0	0	0	0	1
A0A0A0MTN0;Q13617;Q13617-2	0.476219	1	0.752716	0.503408	0.253831	0.223772	0.170596	0.141968	0.118986	0.0760107	0	0.0145995	0.0050357	0.0578351
A0A0A0MTN3	1	0.389692	0	0	0	0.10823	0	0	0	0	0	0	0	0
A0A0A0MTP7;F8VXG7;Q99590;Q99590-2	0.687568	0.907425	0.829298	0.775323	0.640859	0.277711	0.27921	0.245662	0.0254152	0.123273	0	0.137767	1	0.587366
A0A0A0MTQ3;Q96N23;Q96N23-2	0	0	0	0	0	0	0	1	0	0	0	0	0	0
A0A0A0MTQ8;P0C221
A0A0A0MTR7;Q63HN8	0.192312	0.088547	0.519405	1	0.854213	0.690285	0.352455	0.315495	0.393145	0.218953	0.055629	0	0.115732	0.108318
A0A0A0MTS7;Q8WZ42;Q8WZ42-12;Q8WZ42-13;Q8WZ42-2;Q8WZ42-8	0.0814975	0.139043	0.139753	0.0784989	0.0274799	0.0171123	0.0182354	0	0.0238524	0.105129	0.417109	1	0.359661	0.414539
A0A0A0MTS9;K7EKZ0;K7EP24;K7ER94;Q2V2M9;Q2V2M9-2;Q2V2M9-3;Q2V2M9-4	0	0	0	0	0	0	1	0	0	0.547827	0.480929	0	0	0
A0A0A0MTU3;Q4ZIN3;Q4ZIN3-2	0	0	0	0	0.30354	0.706428	1	0.979544	0.804884	0.712552	0.496934	0.505073	0.406585	0.515466
A0A0A6YYA0;Q86XR7-2;Q9Y3B3;Q9Y3B3-2	0.152188	0	0.0677006	0.235596	0.434223	1	0.703962	0.807224	0.715942	0.550389	0.288852	0.319933	0.153154	0.405335
A0A0A6YYC0;E9PJN1;O75676;O75676-2	0.378829	0	0.467367	1	0	0.187324	0.199253	0.324465	0	0	0	0	0	0
A0A0A6YYC7;Q96JP5;Q96JP5-2	0.513971	1	0.798677	0.63732	0.310849	0.535861	0	0.118498	0.208847	0.17461	0.175904	0	0	0.48489
A0A0A6YYG9;F8WCF6;F8WDD7;P59998;P59998-2;P59998-3	0.57656	1	0.474137	0.300223	0.176164	0.196499	0.0631273	0.0654906	0.0712716	0.0532447	0.0466629	0	0.00981921	0.136496
A0A0A6YYH1;Q7Z6K5;Q7Z6K5-2	0.618877	1	0.58694	0.455244	0.41596	0.245383	0.265108	0.266794	0.144176	0.216416	0	0	0	0
A0A0A6YYI3;A0A0B4J1V8;A8MV53;Q9NQ55;Q9NQ55-2;Q9NQ55-3	0	0	0	0	0	0	0	0	0	0	0	0.106651	0	1
A0A0A6YYL2;P0DMM9;P0DMM9-3;P0DMN0	0.746993	1	0.779298	0.516563	0.405698	0.270356	0.161425	0.117539	0.0909175	0.154707	0	0.0585076	0.055212	0.00848488
A0A0A6YYL4;P57737-3	1	0.976632	0.532004	0.420577	0.117699	0.26034	0	0.0201448	0.029238	0.180934	0.654732	0.438667	0.261009	0.411235
A0A0B4J1R2;Q9H6R3	0.0750942	0.111974	0.0940957	0.0640848	0.0147523	0.0089484	0.0122106	0	0.0151109	0.116633	0.666329	1	0.623364	0.490286
A0A0B4J1R4;P32754	0.70488	1	0.628065	0.463141	0.246462	0.189796	0.16256	0.106775	0.0801094	0.0432468	0.0150952	0	0.00654352	0.00946958
A0A0B4J1R7;Q96B45	0.214609	0	0.368016	0.430845	0.349001	0.260504	1	0.68421	0.239052	0.787985	0	0.174226	0.601525	0.617902
A0A0B4J1S8;Q9UBF8;Q9UBF8-2;Q9UBF8-3	0.983172	1	0.75677	0.77452	0.605013	0.668908	0.63324	0.378674	0.469665	0.304863	0	0.207108	0.266574	0.0769755
A0A0B4J1W0;B9TX62;F5GY88;H0YEG1;O75448;O75448-2	0	0	0	0	0	0	0	0	0	0	0	0	0.720795	1
A0A0B4J1Y2;Q8NDW8;Q8NDW8-3;Q8NDW8-5;Q8NDW8-6;Q8NDW8-7	0	0	0.21488	0.38859	0.317263	0	0	0	0.732368	0.744007	0.457248	0.870826	1	0.871153
A0A0B4J1Z1;C9JAB2;Q16629;Q16629-2;Q16629-3;Q16629-4	0.0343261	0.129751	0.19882	0.246794	0.0490365	0.104602	0.0740092	0	0.043564	0.0788621	0.175126	0.482215	0.7863	1
A0A0B4J269	0.541621	0.992746	0.289519	1	0.503885	0.255265	0.384048	0.493125	0.56201	0	0	0	0	0
A0A0B4J291;Q8N8U2	0.868206	1	0	0	0.152593	0.109524	0	0.124211	0	0	0	0	0	0
A0A0B4J294;H3BP13;Q9UL33;Q9UL33-2	1	0.799287	0.746159	0.553944	0.586728	0.574516	0.475995	0.335892	0.462208	0.208834	0	0	0.322062	0
A0A0B4J297;I3L4V0;Q9BRA0;Q9BRA0-2	0	0.0139135	0.0778797	0.0860908	0.321764	0.461906	0.77333	0.579128	1	0.654452	0.409058	0.699085	0.598859	0.359642
A0A0B4J2A0	1	0.853573	0.415916	0.534996	0.257105	0.25101	0.13456	0.0988945	0.152768	0.091022	0.0415754	0	0.0593886	0.0693582
A0A0B4J2C2;F8WF49;Q9Y2H0;Q9Y2H0-1;Q9Y2H0-3	0.715685	1	0.642972	0.520738	0.364715	0.241704	0.195443	0.0968451	0.0613404	0.0546886	0.0497616	0	0.0234626	0.00135012
A0A0B4J2C3;J3KPG2;P13693;Q5W0H4	0.604005	1	0.558621	0.606248	0.644977	0.480444	0.726151	0.467451	0.414185	0.327918	0.141204	0.128011	0.231523	0
A0A0B4J2D5;P0DPI2	0.0719916	0.102838	0.0486497	0.0618847	0.0244816	0.0157847	0	0.00462988	0.0104704	0.114154	0.656022	1	0.715342	0.487848
A0A0B4J2E5;Q15269	0	0	0	0	0	0	0	0	0	0	0	0	0	1
A0A0B4J2F0	0	0	0	0	0	0	0.0967222	0.138232	0.168297	0.1891	0.65901	1	0.906486	0.558754
A0A0B4J2F8;E2QRJ6;F6S314;P52435	0.166423	0.0130078	0.456707	0.281231	0.247804	0.205026	0.131848	0.0754985	0.119792	0.00790491	0	0.171901	0.0871664	1
A0A0B4J2G4;Q15345;Q15345-3	0.565833	1	0.889554	0.71162	0.484754	0.323743	0.247954	0	0.00802539	0.00988207	0.460283	0	0.0765852	0.200147
A0A0C3SFZ9;M0QXD1;M0QY09;M0QZE1;M0QZI3;M0R1K4;M0R3E5;O14526;O14526-2;O14526-3
A0A0C4DFL7;Q16850	0.0992308	0	0.078432	0.124335	0.246265	0.663358	0.850715	1	0.902383	0.557575	0.498613	0.462175	0.325622	0.404851
A0A0C4DFL8;F5GX28;O94953	0	0	0	0	0	0	0	0	0	0	0	0	0	1
A0A0C4DFM1;Q92544	0.186234	0	0.145886	0.213654	0.394712	1	0.716777	0.692535	0.449977	0.439683	0.20311	0.333977	0.123818	0.459963
A0A0C4DFM7;Q5TAX3	0.551504	0.933771	0.736271	0.817082	0.700316	0.570715	0.537602	0.55538	0.281641	0.349294	0.322698	0	1	0
A0A0C4DFP6;Q5T4F6;Q9NQ79;Q9NQ79-2;Q9NQ79-3	0	0	0.109434	0.0651761	0.0364483	0.0314272	0.0226312	0.0322277	0.0957762	0.436782	1	0.995466	0.441323	0.27738
A0A0C4DFR1;O75069;O75069-2;O75069-3;O75069-5
A0A0C4DFU4;Q9HBG7-4
A0A0C4DFV0;Q9H469	1	0	0	0	0.925106	0	0	0	0	0	0	0	0	0
A0A0C4DFW4;Q5JUR7	0	0	0.612141	0.383467	0.165054	0	0	0.441713	0.710725	0.417416	0.571404	0.646338	0.504561	1
A0A0C4DFX2;A0A286YFA9;A0A2R8Y5V8;A0A2R8YCY2;Q5TBA9	0	0	0	0	1	0	0	0	0	0	0	0	0	0
A0A0C4DFX6;A0A0C4DGG6;Q9UHC9;Q9UHC9-2;Q9UHC9-3;Q9UHC9-4	0	0	0	0	0	0	0	0	0.549858	0	0	0	0	1
A0A0C4DFX9;Q9H3P2	0.429567	0.204727	0.39108	0.464095	0.302378	0.177633	0.170117	0.28641	0.394594	0	0.278001	0.633602	0.903697	1
A0A0C4DFY5;A8MXZ4;J9JIE0;Q9NQ84;Q9NQ84-2	0	0	0	0	0	0.305556	0.649546	1	0.533031	0.686844	0	0	0.221374	0.366459
A0A0C4DFY7;Q6UWW8;Q6UWW8-2	0	0	0	0	0	0	0.217318	1	0.889225	0	0	0	0	0
A0A0C4DFZ2;P15289;P15289-2	0	0.63585	0.105057	0.0743788	0.0550984	0.086366	0.121725	0.273376	0.347564	0.776686	0.520086	1	0.48457	0.330378
A0A0C4DG02;F8WE91;Q9Y6K1;Q9Y6K1-2	0	0	0	0	0	0	0	0	0	0	0	0	0	1
A0A0C4DG17;C9J9K3;P08865	0.0136899	0	0.186707	0.191956	0.324416	0.283363	0.40062	0.548173	0.503526	0.626871	0.865037	1	0.931348	0.456572
A0A0C4DG21;A0A7D9NKC8;E7EP65;E7EW77;E9PEZ7;F8WAL6;Q9NYB9;Q9NYB9-2;Q9NYB9-4	0	0	0	0.199596	0	0.510999	0.313577	0.617542	1	0.769229	0	0	0	0
A0A0C4DG26;Q9NP71;Q9NP71-2;Q9NP71-3;Q9NP71-4;Q9NP71-6	0.6365	1	0.386586	0.423648	0.233255	0.253643	0.203806	0	0.0829576	0	0	0	0	0
A0A0C4DG40;Q8NF91;Q8NF91-4	0.308311	0.225301	0.150436	0.186564	0	0.0433768	0.0662204	0.0947528	0.305382	0.408013	1	0.332165	0.358659	0.588647
A0A0C4DG51;Q9NP80;Q9NP80-3	0.087275	0	0	0	0.0197347	0.0442921	0.0762965	0.179966	0.261564	0.60425	1	0.943139	0.494156	0.454136
A0A0C4DG62;F5GYV5;F8WCT1;H7BZV4;Q66PJ3;Q66PJ3-2;Q66PJ3-3;Q66PJ3-4;Q66PJ3-7	0.254535	0	0.222802	0.0951331	0.0610957	0.198279	0.393704	0.21783	0.516665	0.430142	0.268037	0.177763	0.408198	1
A0A0C4DG80;Q9P2N7;Q9P2N7-2;Q9P2N7-3;Q9P2N7-4;Q9P2N7-5	0.679125	0	0	1	0.0296441	0.00492643	0.531759	0.299243	0	0	0	0.0929576	0	0
A0A0C4DG85;P40394;P40394-2	0.589477	1	0.750829	0.516783	0.239576	0.248788	0.14285	0.13995	0.0695087	0.023613	0.0079793	0.00183452	0	0.0327529
A0A0C4DG88;P14859;P14859-2;P14859-3;P14859-4;P14859-5;P14859-6	0.453751	0.326632	0	0.190643	0.334538	0	0.0727314	0	0	0.0764377	0	0.0814564	0	1
A0A0C4DG89;Q7L014	0.190996	0.239008	0.208033	0.225533	0.0782889	0.0682318	0	0.0342514	0.0226467	0.0851701	0.13207	0.267557	0.65432	1
A0A0C4DG90;A4D0S4;A4D0S4-3	0	0	0	0	0	0	0	0	0	1	0	0	0.102793	0
A0A0C4DG91;A0A2R8Y7V2;C9J9V6;C9JQB1;O75414	0	0	0	0	0	0.0411258	0	0	0	0	0.713659	1	0.516311	0.609769
A0A0C4DG95;C9IYJ2;E9PD56;F8WDF7;H7BYG4;Q7Z7A4;Q7Z7A4-2;Q7Z7A4-4;Q7Z7A4-6;W5RWE6
A0A0C4DGA2;O75521;O75521-2	0.116248	0.141428	0.0388315	0.0581589	0	0.0179528	0.0215904	0.0434187	0.108455	0.299624	0.571116	1	0.598913	0.352195
A0A0C4DGA6;Q14527;Q14527-2	0	0	0	0	0	0	0.0930326	0	0	0.161238	0	0	0	1
A0A0C4DGA7;O94929;O94929-3	0	0	0	0	0	0	0	0	0	0.819051	0	0	0	1
A0A0C4DGB0;Q9UIL1;Q9UIL1-2;Q9UIL1-3	0	0	0.802443	0.629911	1	0	0	0	0	0	0	0	0	0
A0A0C4DGB9	0.0844472	0.116592	0.0641116	0.0771625	0.0397164	0.00383761	0.0108751	0.0117856	0	0.0333104	0.819601	1	0.965895	0.45419
A0A0C4DGE4;A0A0J9YW33;A0A286YF28;Q13277;Q13277-2;Q13277-3	0	0	0	0	0	0	0.552833	0.405092	1	0.750894	0	0	0	0
A0A0C4DGE7;Q86UK5;Q86UK5-2;Q86UK5-3	0	0	1	0.837836	0.278174	0	0	0	0	0	0	0	0.203816	0
A0A0C4DGF7;Q6UXC1;Q6UXC1-2;Q6UXC1-3	0.140714	0.122288	0.0626075	0.106878	0.0835315	0	0	0.0397758	0.105018	0.171192	0.451601	1	0.952986	0
A0A0C4DGG1;Q9UKS6	0.0798027	0	0.0712205	0.124845	0.247793	0.170099	0.245928	0.323822	0.449936	0.67024	0.632406	0.416258	0.357232	1
A0A0C4DGG9;A0A2R8Y212;A0A2R8Y425;A0A2R8Y521;A0A2R8Y5J0;A0A2R8YFK9;A0A2U3TZM0;F5GWX5;Q14839;Q14839-2	0.094837	0.333463	0.152626	0.128944	0.0889623	0.0812661	0.0904936	0.0338176	0	0.057823	0.0854247	0.246623	0.3293	1
A0A0C4DGH0;Q5ZPR3;Q5ZPR3-3;Q5ZPR3-4	0.181265	0	0	0	0.0570893	0.14378	0.39083	0.567546	0.689894	1	0.961829	0.827746	0.591791	0.829128
A0A0C4DGH6;A0JNW5	0.201674	0.167061	1	0.316676	0.196571	0.170446	0.209018	0	0	0	0	0	0	0
A0A0C4DGI4	0	0	0	0	0	0	0	0	0	0	1	0	0	0
A0A0C4DGM9;B7Z896;F5H3M2;Q9BVG8;Q9BVG8-2;Q9BVG8-4;Q9BVG8-5;Q9BVG8-6	0	0	0	0	0	0	0	0	0	0	0	0	0	1
A0A0C4DGN6;J3QRU8;Q9Y2X7;Q9Y2X7-3	0.0967699	0.388617	0.243857	0.268735	0.35528	0.258406	0.0230686	0	0.0971519	0.705516	1	0.716706	0.378858	0.243656
A0A0C4DGP0;E7EU35;Q9UKF7-2	1	0.639096	0.376762	0.254306	0.136543	0.274586	0.180308	0.111574	0.0728897	0	0	0	0	0
A0A0C4DGQ4;Q86W25	0	1	0.840533	0.704278	0.405121	0.270841	0.270065	0.345139	0	0	0	0	0	0
A0A0C4DGQ5;P04632	0.655941	1	0.679873	0.500534	0.322777	0.244171	0.207167	0.179314	0.0979739	0.0539413	0.0231281	0	0.0216819	0.0147354
A0A0C4DGQ8;Q6IAN0	0.293845	0	0	0.134131	0.184127	0.340888	0.459667	0.510435	0.508515	0.701747	1	0.987622	0.480301	0.574021
A0A0C4DGR2;M0QY25;M0QYH7;M0QYQ4;M0QZQ2;Q71SY5;Q71SY5-4;Q71SY5-5;Q71SY5-6;Q86YD1;Q86YD1-2	0	0	0	0	0	1	0	0	0	0	0	0	0	0
A0A0C4DGS1;P39656;P39656-3	0.0432592	0	0.0163095	0.0201579	0.0661775	0.164252	0.276189	0.323953	0.379185	0.409028	0.786362	1	0.659422	0.685473
A0A0C4DGV4;E9PLX3;O43504;R4GMU8	0.169813	0.0910326	0	0.0573762	0.132245	0.332897	0.55343	0.773674	1	0.951807	0.677789	0.529832	0.34531	0.53354
A0A0C4DGZ4;Q9Y5U4	0	0	0	0	0	0.345467	0.86582	0.50024	1	0.210929	0	0	0	0
A0A0C4DH01;Q9NVU0;Q9NVU0-2;Q9NVU0-3;Q9NVU0-4;Q9NVU0-5	0.186967	0	1	0.795115	0.440439	0.700524	0.376271	0.136781	0.0587008	0.191367	0	0.167748	0.24548	0.597511
A0A0C4DH13;E5RG96;J3KQJ9;Q8N2E2	0	0	0	0	0	0	0	0	0	1	0	0	0	0
A0A0C4DH16;B8ZZS0;H7BXT7;Q9NYM9	0	0	0	0	0.171401	0.500686	1	0.710934	0.419937	0.289738	0	0	0	0
A0A0C4DH36
A0A0D2X7Z3;Q49AN0;Q49AN0-2	0.104843	0	1	0	0	0.277172	0	0	0.0943652	0	0	0	0	0
A0A0D9SEI0;Q9P0P8	0	0	0	0	0.0902987	0.0257641	0.141204	0.0774654	0.0514912	0.19825	0.709662	0.819354	1	0.247534
A0A0D9SEI3;A0A0D9SEN2;A0A0D9SER5;P21127;P21127-2;P21127-3;P21127-8	0.42384	0.676177	0.763888	0.473275	0.387162	0.28179	0.283635	0.0859529	0.079859	0	0.160106	0.284572	0.428886	1
A0A0D9SEJ5;F5GY05;Q96EK7;Q96EK7-2	0	0	0	0.113668	0.144989	0.14083	0	0.0863459	0	0	0	1	0	0
A0A0D9SEK1	1	0	0	0.409396	0	0.468205	0.280463	0	0	0	0	0	0	0
A0A0D9SEN7;A0A2R8Y7Z3;I3L0L0;Q13950;Q13950-2;Q13950-3	0	0	0	0	0.136225	0	0	0.727966	0	0	0	0	1	0
A0A0D9SES8;H0YKN8;H0YKT5;H0YL70;H0YNI7;H0YNT2;Q04724;Q04726;Q04726-2;Q04726-3;Q04726-4;Q04726-5;Q04726-6;Q04726-7;Q04727;Q04727-2;Q04727-3;Q04727-4	0.873463	1	0	0	0	0	0	0	0	0	0	0	0	0
A0A0D9SET2;A0A0D9SFD0;A0A0D9SGI5;A0A0R4J2G5;A0A1B0GTW4;A0A1B0GV32;D6R942;D6RB91;D6RC63;D6RCM6;D6RG14;D6RG21;D6RJA7;D6RJG6;D8L7E9;H0YM62;Q02078;Q02078-2;Q02078-3;Q02078-4;Q02078-5;Q02078-6;Q05BX2;Q06413;Q06413-2;Q06413-3;Q06413-4;Q06413-5;Q06413-6;Q14814;Q14814-2;Q14814-3;Q14814-4;Q14814-5;Q14814-6	0	0.16212	0	0	0.0526554	0	0	0	0	0.130612	0	0	0.382069	1
A0A0D9SEU5;Q6VN20;Q6VN20-3;R4GMX8	0.382351	0.494924	1	0.621299	0.465938	0.284764	0.350055	0.269681	0.189116	0.0784392	0	0.0129866	0.0714725	0.304326
A0A0D9SEX5;Q9H6R6;Q9H6R6-2	0	0	0	0	0	0	0	0	1	0	0	0.842475	0.621159	0.997149
A0A0D9SEY1;E7EN19;E7ENQ1;G3XAA2;G5E948;H7C360;O95819;O95819-2;O95819-3;O95819-4;O95819-5;O95819-6	0.107756	0.160506	0	0.015788	0.398148	0.384316	0.29703	0.521598	0.755917	0.478283	0.689805	0.341043	0.482385	1
A0A0D9SF44;A0A0R4J2E2;Q9Y3T6;Q9Y3T6-3	0.457494	0	0.834659	1	0.540941	0.324652	0	0.368219	0.412964	0.152968	0.196855	0.16511	0.164267	0
A0A0D9SF53;A0A0D9SFB3;A0A0D9SG12;A0A2R8Y4A4;A0A2R8Y645;A0A2R8YCW1;A0A2R8YF78;A0A2R8YFR4;A0A2R8YFS5;A0A2U3TZJ9;O00571	0.230218	0	0.178404	0.382382	0.679488	0.784289	0.876287	0.795668	0.830352	0.766637	0.866705	0.837092	1	0.923031
A0A0D9SF60;Q99569;Q99569-2	0.16911	0.405242	0.194313	0.0815956	0	0.0731818	0.0708328	0.232343	0.31273	0.391187	0.347277	0.422258	0.189911	1
A0A0D9SF63;Q9BZK7	1	0.524079	0.68325	0.309664	0.167007	0.17392	0	0	0.108441	0.103623	0	0.242761	0.438534	0.26158
A0A0D9SFB1	0	0	0	0	0	0	0	0	0	1	0	0	0	0
A0A0D9SFB5;P08319;P08319-2	0.73287	1	0.702381	0.620648	0.394212	0.274627	0.160504	0.117048	0.120511	0.056968	0.0219777	0.00309604	0	0.0071148
A0A0D9SFE1;Q9H936	0.0129067	0	0	0.00306586	0.0091036	0.0276775	0.0653593	0.11192	0.213407	0.541069	0.91397	1	0.498258	0.413851
A0A0D9SFG6;O43739;O43739-2;Q15438;Q15438-2;Q15438-3;Q99418;Q99418-2	1	0.847803	0.563348	0.478497	0.36144	0	0.212671	0.357844	0.288178	0.331501	0	0.142656	0.2901	0.46832
A0A0D9SFJ2;A0A1B0GWF1;A0A2R8Y5Y4;A0A2R8Y6P1;Q6ZU35
A0A0D9SFK2;Q92614;Q92614-3;Q92614-4	0.174483	0.243664	0.403976	0.378833	0.0592523	0.0530701	0	0.0737136	0.242936	0.293451	0.235429	0.371514	0.01907	1
A0A0D9SFR6;Q16760;Q16760-2;Q86XP1;Q86XP1-2;Q86XP1-3;Q86XP1-5	1	0	0	0	0.963615	0	0	0	0.231802	0	0	0	0	0
A0A0D9SFT8	0	0	0	0	1	0.363293	0	0	0	0	0	0	0	0
A0A0D9SG71;P49459;P49459-3	0	0	0	0	0	0	0	1	0	0	0	0	0	0
A0A0D9SG72;A0A1B0GTP9;A0A1B0GVQ5;A0A1B0GWF2;A0A2R8Y5D4;P61764;P61764-2	0.141162	0	0.0670756	0.188922	0.322999	0.474884	0.490533	0.951415	0.98146	0.885829	0.724499	0.598008	0.26391	1
A0A0D9SG79;Q9NZ09;Q9NZ09-3;Q9NZ09-4
A0A0D9SG96;Q9ULB1-3	0	0	0	1	0.576664	0	0.262972	0.429285	0.412788	0	0	0	0	0
A0A0D9SGD6;B0QZE2;B7Z2J6;E7ENI9;E7EV75;Q15326;Q15326-2;Q15326-5	0	0	0	0	0	0	1	0	0	0	0	0	0	0
A0A0D9SGF6;Q13813;Q13813-2	0.120102	0.0322881	0.0242473	0.0254779	0.000893558	0	0.00134048	0.0762554	0.254344	0.526636	0.580357	0.58995	0.518733	1
A0A0D9SGH0;A0A1B0GV11;Q92581;Q92581-2;Q92581-3	0	0	0.0631285	0.219252	0.73628	1	0.762318	0.643359	0.485713	0.369586	0.231157	0.197047	0.129504	0
A0A0D9SGJ6;C9JFZ1;J3KPK1;J3KQV8;O43426;O43426-2;O43426-4	0.877054	0.387466	1	0.757272	0.442448	0.341233	0.12767	0.206073	0.104919	0.169913	0.338295	0.0313936	0	0.154228
A0A0G2JH30;A0A0G2JPX0;A0A2R8YFP9;A6NK88;P49918;P49918-2	0.212311	1	0	0	0.414097	0	0.25307	0.296085	0	0	0	0	0	0
A0A0G2JH68;O60610	0.702883	1	0.672675	0.454175	0.270209	0.268952	0.222645	0.222117	0.15607	0.136323	0.0152891	0.000151379	0	0.063069
A0A0G2JHC2;Q6NYC8	0	0	0	0	0	0	0	0	0.442216	1	0	0	0.148952	0.664399
A0A0G2JHL0;A0A0G2JK44;A0A140T9E9;A0A140T9F7;A0A140T9V2;H0Y6K2;P25440;P25440-2;P25440-3;U3KQA6	0	0	0	0	0	0	0	0	0	0	0.0733234	0	0.165462	1
A0A0G2JI43;A0A0G2JIJ2;A0A140T926;A0A140T9C9;A0A140T9I2;A0A140T9R0;A0A140T9R2;A0A140T9T8;A0A140T9U6;F6UB75;P28068	0.634108	0	1	0.867447	0.315945	0.222425	0	0.18944	0.213852	0	0	0	0.0822688	0.27522
A0A0G2JIR1;A0A0G2JIS2;A0A0G2JK64;A0A0G2JRN8;A0A0G2JRR0;A2ABF8;A2ABF9;Q96KQ7;Q96KQ7-2	0	0	0	0	0	0	0	0	0	0	0	0	0	1
A0A0G2JIW1;P0DMV8;P0DMV9	0.642123	1	0.631756	0.639532	0.411084	0.237035	0.164348	0.203439	0.127426	0.148757	0.0571676	0	0.0732464	0.111222
A0A0G2JJD3;O95870	0.100665	0	0.072119	0.117565	0.219578	0.48302	0.53233	0.629391	0.678172	0.698616	0.912785	1	0.561054	0.654035
A0A0G2JJP1;Q9C019	0	0	0.224631	0.360039	0.664824	0.680567	0.74686	0.762072	0.622379	0.862861	0.883792	0.805112	1	0.473337
A0A0G2JL52;A0A140T8Y0;A0A140TA35;B4E0K6;Q5ST30;Q5ST30-4	0.0483008	0.106178	0.159393	0.0616064	0	0	0.00905921	0	0.0636919	0.22632	0.727697	1	0.618348	0.513456
A0A0G2JLK7
A0A0G2JLQ8;A0A0G2JLX3;A0A0G2JNC8;A0A0G2JP37;A0A0G2JPB6;A0A0G2JPQ2;F5H5B1;F5H7Q5;J3KN39;K7EJ90;K7ELX1;Q9NX02;Q9NX02-2;Q9NX02-3;Q9NX02-4	0	0	1	0	0	0.364149	0	0.345899	0.387236	0.649891	0	0	0	0
A0A0G2JM39;A0A0G2JN91;A0A0G2JNH1;M0QYD1	0	0	0.0396952	0.0271244	0	0	0	0	0.0300948	0.0867551	0.391536	1	0.238018	0.316061
A0A0G2JM63;A0A0G2JNK3;A0A0G2JPH3;Q8WX94-2;Q8WX94-3
A0A0G2JM70;Q9NV79;Q9NV79-2;Q9NV79-3;V9GZ41	0	1	0	0	0.799105	0.301305	0	0	0	0	0	0	0	0
A0A0G2JMD2;A0A2R9YJI8	0.126961	0	0.00602078	0.111494	0.602795	0.805441	0.951025	1	0.776938	0.521464	0.461075	0.554269	0.406442	0.273935
A0A0G2JMW3;A0A0G2JP44;Q9HBB8;Q9HBB8-2;Q9HBB8-4
A0A0G2JMX7;A0A0G2JPD5;A0A0G2JQJ7;A0A0G2JS76;P10636;P10636-6;P10636-7;P10636-8;P10636-9	0.521573	0.99835	0.587731	0.307841	0.747102	0.526215	1	0.494051	0.505149	0.537161	0.442398	0	0.496937	0.668256
A0A0G2JMZ6;O60282	0	0.0990729	0	0	0	0	0	0	0	0	0	1	0	0.36448
A0A0G2JMZ8;Q16625	0.100176	0.0721518	0.0524206	0	0.0294252	0.0644147	0.163182	0.238932	0.363061	0.792025	0.482331	0.250133	0.256262	1
A0A0G2JN23;A0A0G2JQ38	0	0	0	0	0	0	0	0.13901	0.415741	0.466533	0.453729	0	0.123301	1
A0A0G2JN42;A0A0G2JNJ8;Q6W4X9	0	0	0	0	0	0	0.398064	1	0	0	0	0	0	0
A0A0G2JN53	0	1	0	0	0	0	0.356154	0.248432	0	0.172775	0.249874	0.259525	0.239752	0.230552
A0A0G2JN84;P59817	0	1	0	0	0	0	0	0	0	0	0	0	0	0
A0A0G2JNW7;Q9Y666	0.199166	0	0	0	0.129061	0.253208	0.278409	0.577936	0.749331	0.653164	0.579466	0.668282	0.254632	1
A0A0G2JNZ2;A0A669KB89;Q14160	0.157754	0.131276	0.0793237	0.0492352	0.00224747	0	0.0319969	0.168053	0.339571	0.476044	0.476228	0.4489	0.517021	1
A0A0G2JPC8;B4DTC2;E7EPX8;E7ER82;Q8TC27	0	0	0	0	0	1	0.485731	0.471073	0	0	0	0	0	0
A0A0G2JPZ6;A0A0J9YWU2;Q9H3Q3	0	0	0	0	0.130972	0.0782143	0.498863	0.221011	0.416968	0.504431	0.663258	1	0.183544	0
A0A0G2JQ41;A0A1C7CYZ0;B7Z683;Q12979;Q12979-2;Q12979-4	0.572868	1	0.293362	0.294818	0	0	0	0	0	0	0	0	0	0
A0A0G2JQC6;A0A0G2JQK9;A0A0G2JRT1;E7EWN1;Q99102-3	0	0	0	0.974161	1	0	0	0	0	0	0	0.897059	0	0
A0A0G2JQT1;A0A0G2JR96	0	0	0	0	0	0	0	1	0.900417	0	0	0	0	0
A0A0G2JRG1
A0A0G2JS52;Q01538;Q01538-2
A0A0J9YVP6;Q9UHX1-2	0.456322	0.679349	0.380625	0.262969	0.119911	0.0654236	0.0529428	0	0.068252	0.0686716	0.140827	0.214489	1	0.528998
A0A0J9YVW4
A0A0J9YW18;F6RP06;Q12983	0	0	0	0	0.0876659	0.152457	0.131343	0.348453	0.29574	0.618724	0.979107	1	0.692692	0.864214
A0A0J9YW63	0.509948	0	0	0	0	0	0	0	0	1	0.831085	0	0	0
A0A0J9YW64;A6NIW2;Q5JSL3	0	0	0	0	0	0	0	0	0	0	1	0	0	0
A0A0J9YWD2;A0A0J9YX19;A0A0J9YXY6;A0A0J9YYK8;A0A1B0GTJ5;A0A1B0GU79;A0A1B0GUR8;A0A1B0GVR1;Q9UBY8
A0A0J9YWD5;A0A0J9YX88;A0A0J9YYB5;B7ZM65;E9PJ24;F8WEF5;Q9P1Y6;Q9P1Y6-2;Q9P1Y6-3	0	0	0	0	0.250886	0.172307	0.50458	0.291129	0.23147	0.354019	0	0	0.34929	1
A0A0J9YWD6;O75398-5	0	0	0	0	0.379386	0	0	1	0	0	0	0	0	0
A0A0J9YWE1;A0A0J9YWN0	0.487696	0	0.0779818	0	0	0	0	0	0	0	0	0	1	0
A0A0J9YWL0;Q9Y4K1	0	0	0	0	0.161054	0	0	0	0	0	0	0	0	1
A0A0J9YWR7;A0A0J9YXE4;Q8N2F6;Q8N2F6-2;Q8N2F6-3;Q8N2F6-4	0	0	0	0	0.0373167	0.0664709	0.112312	0.106811	0.25394	0.418136	0.813553	1	0.455974	0.479414
A0A0J9YWV4;O75154;O75154-2;O75154-3;X6RFI8	0.658138	1	0.420063	0.838186	0.660812	0	0	0	0	0	0	0	0	0
A0A0J9YX34;A0A6Q8PEY7;A0A6Q8PF18;A0A6Q8PF63;A0A6Q8PF74;A0A6Q8PFB0;A0A6Q8PFI4;A0A6Q8PFM2;A0A6Q8PFS5;A0A6Q8PFV0;A0A6Q8PFX3;A0A6Q8PG16;A0A6Q8PGE9;A0A6Q8PGG4;A0A6Q8PGL5;A0A6Q8PH06;A0A6Q8PHE9;A0A6Q8PHG4;A0A6Q8PHP4;A0A6Q8PHR6;C9J084;Q9C040;Q9C040-2
A0A0J9YX62;C9J2C4;O75190;O75190-2;O75190-3	0.420848	0.622649	0.387147	0.308334	0.0284639	0.066072	0.142368	0.0662148	0	0.123972	0.0832791	0.0844424	0.108675	1
A0A0J9YX66;A0A0J9YXJ0;A0A1B0GU44;A0A1B0GUN8;E9PC62;O95319;O95319-2;O95319-3;O95319-4;O95319-5;Q5VZZ6;V9GYD9	0	0	0	0	0.360253	0	1	0.299933	0.563449	0.309435	0	0	0	0
A0A0J9YXF2;Q15165;Q15165-1	0.0655057	0	0.0318972	0.056715	0.221446	0.568995	1	0.760607	0.941324	0.406517	0.478974	0.550897	0.505288	0.431443
A0A0J9YXM6;Q562E7	0.883171	0.843321	0.995799	1	0.679949	0.541723	0.471709	0.620667	0.463115	0.301596	0.377071	0	0.205613	0.278659
A0A0J9YXN7	1	0.144233	0.079236	0.0557002	0	0.0265822	0.0265071	0.0617066	0.0738032	0.097218	0.0548407	0.0325927	0.0833075	0.126672
A0A0J9YXT0;H7C5H6;Q9H0F7;Q9H0F7-2	0.8186	1	0.384199	0.745813	0.598541	0.293551	0	0.0609857	0.256582	0	0.136568	0.189252	0.0882984	0.14686
A0A0J9YY17;A0A1C7CYW8;A0A669KB38;Q8IVF4	0	0	0	0	0	0	0	0	0	1	0	0	0	0
A0A0J9YY72;A0A1W2PQQ1;Q5HYW2
A0A0J9YYF0	0	0	0	0	0	0	0	0	0.991019	0	0	0.549298	1	0.761652
A0A0J9YYF7;Q86T65;Q86T65-4	0	0	0	0	0.112831	0	0	0	0	0.42785	0.661884	1	0	0.428081
A0A0K0K1A5	0	0.0655961	0.0552786	0.29105	1	0.247754	0	0	0	0	0	0	0	0
A0A0R4J2E8;D6REM6;P43243	0.0165379	0	0.0463022	0.0986324	0.148623	0.132638	0.187676	0.15938	0.130703	0.168125	0.197016	0.317509	0.63661	1
A0A0R4J2F3;P0DPB6	0.703588	0.518513	0.892226	0.88635	0.885551	0.61948	0.512107	0.145347	0	0.168661	0	0	0	1
A0A0R4J2F6;Q12894;Q12894-2	0	0	0.145457	0.354965	0.503484	0.674661	0.921609	0.533314	0.548733	0.820103	0.304667	0.935101	0.735795	1
A0A0S2Z4L3;A0A3B3ISJ1;G5E9F8;P07225	0	0	0	0	0.121618	0.412017	0.810869	1	0.804097	0.616922	0.587211	0	0	0.408986
A0A0S2Z4L7;O60603	0	0	0	0	0	0	0.07053	0.44298	1	0.604105	0.500018	0	0	0
A0A0S2Z4Q7;A0A1W2PQQ6;A0A1W2PQR0;A0A1W2PR45;A0A1W2PRC6;A0A1W2PRD9;A0A1W2PRY1;A0A1X7SBT2;C9JYS9;Q9UNP4;Q9UNP4-2;Q9UNP4-3	0	0	0	0	0.445905	0.879082	1	0.757195	0.80432	0.432876	0.257649	0.163908	0.182229	0.626164
A0A0S2Z5D0;A0A1B0GTU6;H3BUV4;Q9NWW5;Q9NWW5-2	0	0	0	0	0	0.169111	0	1	0.429768	0.683816	0.680397	0.522539	0.482639	0.21708
A0A0U1RQE4;A0A494C1M0;Q5HYK7;Q5HYK7-2;Q5HYK7-3	0.847913	0.673841	1	0.991167	0.955221	0.886021	0.83328	0.393136	0.365944	0.615802	0	0	0	0.160967
A0A0U1RQK7	0.763678	1	0.711413	0.654427	0.54397	0.767297	0.672634	0.651265	0.658612	0.896083	0.462355	0.352418	0.957737	0
A0A0U1RQK9	0	0	0	0	0	0	0	0	0	0.776857	0	0	1	0
A0A0U1RQM0;H0YKX3;H0YMA4;Q15004	0	1	0	0	0	0	0	0	0	0	0	0	0	0
A0A0U1RQQ9;Q6P3W7	0.477525	1	0.336872	0.330562	0.363675	0.505544	0.797328	0.25881	0.483376	0.387622	0.14795	0.541954	0	0.283249
A0A0U1RQS4;A0A0U1RR93;Q9BYB0;Q9BYB0-3	0	0	0	0	0	0	0	0	0.889171	1	0	0	0	0
A0A0U1RQT8;Q8TCZ2;Q8TCZ2-2;Q8TCZ2-3;Q8TCZ2-5	0.422629	0	0	0	0	0	0.356082	0.531807	0.965407	1	0.400965	0.431253	0.307838	0.690076
A0A0U1RQW3;Q8WXE1;Q8WXE1-2
A0A0U1RQW6;E7EPU2;Q9Y2E4	0.140866	0.329388	0.288471	0.584631	0.164159	0	0.240172	0.0463079	0.344175	0.232416	0.193601	0.532531	0.139961	1
A0A0U1RQY4	0	0.068145	0.202536	0.19054	0	0	0.983495	0	0	0	0.385742	0	0.535695	1
A0A0U1RR06;Q9Y484;Q9Y484-2;Q9Y484-3	1	0.626131	0.384427	0.50067	0.218356	0.176796	0.280722	0.268071	0.184376	0.0991565	0.0802366	0.477498	0	0.385315
A0A0U1RR16;A0A3B3IRZ7;Q8NEY4;Q8NEY4-2	0.258347	0	0.469698	0.285883	0.319791	0.354956	0	0	0.0650865	0.0950413	0	0.390294	1	0.771391
A0A0U1RR25	0	0	0	0	0	0	0	0	1	0	0	0	0	0
A0A0U1RR27;H3BTW5;Q7Z401;Q7Z401-2	0.128824	0.905047	0.802978	1	0.503559	0.421301	0	0	0	0	0	0	0	0.236714
A0A0U1RR32;A0A0U1RRH7;P0C0S8;P20671;Q96KK5;Q99878;Q9BTM1	0.00882099	0	0.000920348	0.00212804	0.00281332	0.00453285	0.00739671	0.0204118	0.0173326	0.0479504	0.097541	0.215907	0.0649798	1
A0A0U1RR76;A6NJ78;A6NJ78-2;A6NJ78-4;P0C7V9	0	0	0	0	0	0	0	0	0	0.252719	0.812271	1	0.566179	0
A0A0U1RRA6;B5MCG9;B5MCU0;H7C0E9;Q9Y2K5	0.684796	0	0.517199	0	1	0.49091	0.663184	0.336776	0.221708	0	0	0	0	0
A0A0U1RRB6;J3QT38;Q9Y2D4;Q9Y2D4-2	0.229248	0	0.389456	0.387482	0.312652	0.317847	0.316758	0.579814	0.707775	0.402277	0.622926	1	0.642591	0.766803
A0A0U1RRB9;F2Z2V1;Q96C11;Q96C11-3	0.639716	1	0.670832	0.386138	0.206124	0.185312	0.15491	0.109612	0.0892414	0.0722053	0	0	0	0
A0A0U1RRK1;A0A286YF11;F6XEV2;Q9BPX6;Q9BPX6-3	0	0	0	0	0	0	0	0.125356	0.221402	0.395582	0.875977	1	0.474242	0.562799
A0A0U1RRL7	0	0	0	0	0	0	0	0	0	0	0	0	0.860339	1
A0A0U1RRL8;Q8TB22;Q8TB22-2;Q8TB22-3	0.0495271	0.0447173	0.0753948	0.0388548	0.0520459	0	0.0180636	0	0.0680606	0.210349	0.583762	1	0.602368	0.589884
A0A126GWB3;P47888
A0A140LJL2;Q8N350	0.295746	0	0	0	1	0	0	0	0	0	0	0	0	0
A0A140T8Y3;A0A140T902;A0A140T9C0;A0A140TA33;A0A140TA41;A0A140TA52;A0A3B3ISX9;P22105;P22105-1;P22105-4	0	0.141276	0.0502486	0.101998	0.216443	0.134135	0.204417	0.145223	0.176812	0.164343	0.12079	0.107386	0.102808	1
A0A140T913;A0A140T933;A0A140T955;A0A140T9I0;A0A140T9X5;A0A1W2PRT9;Q53Z42	0.148665	0	0.0189817	0.0552252	0.19769	0.417587	0.591374	1	0.762063	0.726084	0.896766	0.514137	0.386712	0.990597
A0A140T951	0.0701506	0	0	0	0.0467213	0.268973	0.580828	0.610796	0.43686	1	0.591337	0.286968	0.290192	0.871445
A0A140T962;A0A140T9B3;A0A140T9J9;A0A1W2PR11;Q5QT33	0.130719	0	0	0.150863	0.355515	0.547143	1	0.890497	0.517898	0.920649	0.500042	0.558075	0.402706	0.393036
A0A140T9G8;Q0P5T2;Q5SQH8;Q5SQH8-2;Q5SQH8-4	0	0	0	0	0	0	0	0	0	0	0	0.826723	0	1
A0A140T9T7;Q03518	0	0	0	0.0573202	0.19722	0.513935	0.619813	0.745232	0.87505	0.536445	0.570114	1	0.392294	0.550247
A0A140TA01;E9PQT8;E9PQZ5;O43189;O43189-2	0	0	1	0	0	0	0	0	0	0	0	0	0	0
A0A140TA09;Q99942	0.771256	1	0.77929	0.0701544	0.278433	0.483609	0.750856	0.72041	0.369438	0.635194	0	5.36369e-05	0.196341	0.368657
A0A182DWF2;A0A182DWF3;Q9NNW7;Q9NNW7-2	0.0758882	0.129052	0.108071	0.0780686	0.0295437	0.0172811	0.0135803	0	0.0227551	0.0813579	0.629087	1	0.661277	0.546185
A0A182DWH7;P49908	0.34997	0	0.289118	0.475729	0.391204	0.611056	0.635572	1	0.418783	0.298623	0.300965	0.557297	0.130957	0.261539
A0A182DWI4;E9PN30;Q9BQE4	0	0	0	0	0	0	1	0.814088	0.661666	0	0	0	0	0
A0A1B0GTB0;A0A1B0GTU8;A0A1B0GU12;A0A1B0GUT7;A0A1B0GVB9;A0A1B0GVC7;A0A1B0GVW0;A0A1B0GWJ8;A0A1C7CYW4;B7Z413;H7C3E1;O75787;O75787-2	0	0	0	0	0	0	0.89043	0.206412	0.916915	0.955916	0	1	0	0
A0A1B0GTF3;A0A6I8PIT5;A0A6I8PIW1;A0A6I8PLB1;O43301
A0A1B0GTG2;A0A1B0GW77;P49419;P49419-2	0.362439	0.454832	0.365548	0.289443	0.135399	0.0573058	0.0320213	0.0281871	0	0.0761241	0.813028	1	0.831971	0.384738
A0A1B0GTJ7;A0A1B0GWJ0;P30566	0.644421	1	0.730177	0.553802	0.317146	0.206844	0.128375	0.113377	0.0904681	0	0.0203765	0.0324752	0.0265386	0.00827124
A0A1B0GTJ8;A0A1B0GV63;A0A1B0GVK1;A0A1B0GWJ2;A0A3F2YNW7;A0A6Q8NVI4;H0Y7H8;Q8NFD5;Q8NFD5-2;Q8NFD5-3;Q8NFD5-4	0.126218	0.483116	0.312488	0	0.242413	0	0	0	0.334393	0	0	0.414906	0.314801	1
A0A1B0GTK6	0.755128	1	0.424032	0.290848	0.250236	0.236511	0.203402	0.181274	0	0	0	0	0	0
A0A1B0GTM1;A0A1B0GUM5;E7ETX0;Q8NHX9	0	0	0	0	0	0.175224	1	0.316663	0.253225	0.237305	0	0	0	0
A0A1B0GTM3;A0A1B0GUA4;A0A1B0GUH5;A0A1B0GW68;Q13510;Q13510-2	0.429445	0	0.0418853	0.130815	0.250822	0.224968	0.315998	0.565879	0.705817	0.700749	0.662948	0.524497	0.743017	1
A0A1B0GTT2	0	0	0	0	0	0	1	0	0	0	0	0	0	0
A0A1B0GTU3;Q96L93;Q96L93-2;Q96L93-4;Q96L93-5;Q96L93-6	1	0	0	0	0	0	0	0	0	0	0	0	0	0
A0A1B0GTU4	0.748286	1	0.76511	0.455026	0.231267	0.110353	0.116905	0.0347962	0.200012	0.272246	0.0972402	0.0527845	0	0.164821
A0A1B0GTU5;H0Y488;O14497;O14497-2;O14497-3	0	0.808902	0.35247	0.221235	0.271422	0.166966	0.249657	0.268915	0.0880235	0.0180132	0	0.482311	0.275983	1
A0A1B0GTU7;H0YD36;P54098	0	0	0	0	0	0	0	0	0	0	0.688161	1	0.618958	0.670344
A0A1B0GTV6	0	0	0	0	0	0	0	0.21304	0.120872	0.512299	1	0	0	0.947382
A0A1B0GTW1;A0A2R8YDH4;A0A3B3ITE1;Q9UDY2;Q9UDY2-3;Q9UDY2-7	0.243239	0.131924	0.0902778	0.107102	0.115735	0	0.00802903	0.186176	0.44385	0.697397	0.659067	0.568768	1	0.844363
A0A1B0GTX1;A0A1C7CYY6;Q6XZF7;Q6XZF7-2	1	0	0.11109	0.423594	0	0	0	0	0	0	0	0	0	0
A0A1B0GUA3;A0A6Q8PGG2;A0A6Q8PH45;A0A6Q8PHL8;Q96EK5	0	0	0	0	0	1	0	0	0	0	0	0	0	0
A0A1B0GUC2;A0A1W2PP33;C9J7I0	0	0	0	0	1	0	0	0	0	0	0	0	0	0
A0A1B0GUF4	0	0	0	1	0	0	0	0	0	0	0	0	0	0
A0A1B0GUG7;A0A1B0GWB7;A0A1B0GWI3;A0A1B0GWK3	0	0	1	0	0	0	0	0	0	0	0	0	0	0
A0A1B0GUI1;Q6GYQ0;Q6GYQ0-2;Q6GYQ0-3;Q6GYQ0-4;Q6GYQ0-5;Q6GYQ0-6;Q6GYQ0-7
A0A1B0GUL3	0	0	0	0	0	0	0	1	0	0	0	0	0	0
A0A1B0GUL6;E9PEZ5;Q9UPP5;Q9UPP5-2	0.756508	1	0	0	0	0	0	0	0	0	0	0	0	0
A0A1B0GUN5	0.0696961	0.305472	0	0.00461026	0.0924963	0.052972	0.124403	0.227909	0.162677	0.419429	0.389275	0.568157	0.338473	1
A0A1B0GUN9	0.29091	1	0	0	0.253817	0.285944	0.381842	0.569104	0.373232	0.343573	0.538408	0.257084	0	0.230402
A0A1B0GUS7	0	0	0	0.688418	1	0.0901554	0	0.280873	0	0.38174	0	0	0	0
A0A1B0GUZ2;P00797;P00797-2	1	0	0	0	0	0.347073	0	0	0	0	0	0	0	0
A0A1B0GUZ7;Q14156;Q14156-2	0	0	0	0	0	0.137007	0.297985	0.637926	0.706465	0.810126	0.614767	0.607562	0.217512	1
A0A1B0GV47;Q7Z4S6;Q7Z4S6-2;Q7Z4S6-4;Q7Z4S6-5;Q7Z4S6-6	0.628898	1	0.83285	0.663249	0.402432	0.381647	0.345449	0.275197	0.323306	0.274039	0	0.108743	0.0955697	0.19704
A0A1B0GV48;D6RBC4;Q8NAP3	0	0	0	0	0	0	0	1	0	0	0	0.824536	0	0
A0A1B0GV71;A0A1B0GW34;A0A1B0GWD3;B4DFF3;H3BNK7;H3BR00;O95086;Q13286;Q13286-2;Q13286-3;Q13286-4;Q13286-5;Q13286-7;Q2TA70;Q9UBD8	0	0	0	0	0	0	0	1	0.589678	0.456317	0	0.947798	0.697207	0
A0A1B0GVD5;A0A1B0GVP3;A0A1B0GW44;A0A1B0GWE8;P07339	0.0911014	0.0609639	0.00256493	0	0.0831001	0.146217	0.276833	0.586966	0.868338	0.722904	1	0.854157	0.740879	0.979313
A0A1B0GVG4	0	0	0	0.718973	0	1	0	0	0	0	0	0	0	0
A0A1B0GVI7;A0A2R8Y7G1;P35869	0.49593	0.962942	0.553248	0.334057	0.399873	0.379392	0.324666	0.331246	0.259946	0.227176	0	0	0.212958	1
A0A1B0GVL3;Q05086;Q05086-2;Q05086-3	0.646798	0.794647	1	0.777032	0.473813	0.38278	0.251482	0.251672	0.243067	0.180195	0	0.0144507	0.0234123	0.100698
A0A1B0GVV3;Q5EBL4	0.72756	1	0.959493	0.833955	0.472063	0.42011	0.386359	0.28237	0.29401	0.274709	0	0	0	0
A0A1B0GVV8	0	0	0	1	0.859858	0	0.339964	0	0.560077	0.101809	0.130115	0	0.0942451	0.130124
A0A1B0GW05	0	0	0	0	0.125824	0.367253	0.499985	0.728419	0.752223	0.616638	0.608563	1	0.979229	0.614306
A0A1B0GW23;Q03154	0.7081	1	0.695415	0.564472	0.35949	0.26632	0.304686	0.127888	0.100615	0.0614644	0.0158573	0	0.0136787	0.000416737
A0A1B0GW38	0	0.280029	0.28278	0.30467	0.160641	0.181763	0.163943	0.102565	0.159556	0	0	1	0.911602	0
A0A1B0GW41;E9PEN0;Q8WYH8;Q8WYH8-2	0	0	0	0	0	0	0	0	0	0	0	0	0	1
A0A1B0GWB2	0	0	0	0	0	0	0.708827	0	1	0	0	0	0	0
A0A1B0GWD8;Q9C093-4	0	0	1	0	0	0	0.222631	0.197234	0	0.155942	0	0	0.0316191	0
A0A1B0GWI2;O75503	0.112778	0	0	0	0	0	0.112504	0.286342	0.492177	0.545168	0.493289	0.557766	0.525922	1
A0A1C7CYX0	0	0	0	0	0.166224	0	0.253128	0.398956	1	0.661802	0.40532	0.601896	0.278235	0.82054
A0A1C7CYX9	0.685019	1	0.792422	0.683506	0.474405	0.296695	0.35074	0.211045	0.228773	0.147135	0.0357539	0	0.0128428	0.0260283
A0A1D5RMN4;P23945;P23945-2;P23945-4
A0A1P0AYU5;Q9BWM7	0	0	0	0	0	0	0	0.133657	0.131403	0.194695	1	0.658051	0.279202	0.227085
A0A1W2PNF0;A0A1W2PNY6;A0A1W2PPE6;A0A1W2PPG9;A0A1W2PPH4;A0A1W2PQ13;A0A1W2PQ60;A0A1W2PQD6;A0A1W2PQH2;A0A1W2PQL8;A0A1W2PR66;A0A1W2PRN3;A0A1W2PRT7;A0A1W2PS45;A0A1W2PS77;A0A1W2PSA9;A0A1W2PSD1;Q9Y2D2;Q9Y2D2-2;Q9Y2D2-3	0.158802	0	0	0.0312256	0.108954	0.243617	0.270283	0.332568	0.551705	0.485229	0.641425	1	0.314784	0.36517
A0A1W2PNH8;A0A1W2PNQ8;A0A1W2PNR0;A0A1W2PNW5;A0A1W2PPB6;A0A1W2PPR7;A0A1W2PQA9;A0A1W2PQP4;A0A1W2PQZ1;A0A1W2PS19;K7ELE1;K7EPJ2;O95427	0	0	0	0	0	0.332383	0	1	0.990295	0	0	0	0	0
A0A1W2PNP0;Q969N2;Q969N2-5	0	0	0	0	0.18608	0.620634	0.687679	0.991712	1	0.704138	0.938549	0.82924	0.531031	0.891363
A0A1W2PNR9;Q9Y5U9	0	0	0	0	0.234681	0.440442	0.541956	1	0.69736	0	0.249813	0	0	0
A0A1W2PNT1
A0A1W2PNU4;A0A286YES2;F8VYC4;P0DJD0;P0DJD1	0	0	0	0	0	0	0	0.131489	0.276212	0.341404	0.081674	0.181844	0.36708	1
A0A1W2PNV4	0.784731	0.845571	1	0.80709	0.219395	0.391781	0.20137	0.138647	0.313085	0.237646	0.186921	0.0780769	0	0.176136
A0A1W2PNW1;A0A494C0T4;H0YJH6;P42226;P42226-3	0.85296	1	0.90053	0.589988	0.298336	0.371949	0.275878	0.0991534	0.275792	0.160398	0	0	0.145361	0.16198
A0A1W2PNX8;Q9H3U1;Q9H3U1-2	0.570224	1	0.760854	0.495056	0.263348	0.197725	0.195791	0.127944	0.119223	0.121671	0	0.171951	0.0820313	0.105651
A0A1W2PNY5;A0A1W2PPP6;A0A1W2PQA7;A0A1W2PQZ6;A0A1W2PR08;A0A1W2PRF0;A0A1W2PRF5;A0A1W2PRJ0;A0A1W2PS93;A0A1X7SBS0;G5E9D4;Q96EB1;Q96EB1-2;Q96EB1-3	0	0	0	0	1	0	0	0	0	0	0	0	0	0
A0A1W2PNZ9;H7BXU7;Q15652;Q15652-3	0	0	0	0	1	0	0	0	0	0	0	0	0	0
A0A1W2PP04;Q5JY83;Q9Y388	0	0	0	0	0	0	0	0	0	0	0	0	0.261792	1
A0A1W2PP11;Q9H300	0	0	0	0	0	0	0	0	0	0.218709	0.327051	1	0.213773	0.161513
A0A1W2PPB5;Q13873;Q13873-2
A0A1W2PPB7;E9PH70;H0Y8E4;Q9ULH0;Q9ULH0-2;Q9ULH0-4	0	0	0	0	0	0	0.103747	0.353419	0.766558	1	0.868136	0.748353	0.672005	0.719457
A0A1W2PPC6;Q9H3H5;Q9H3H5-2	0	0	0.0842618	0.182086	0.400521	0.610997	0.748768	0.80668	0.828463	0.545316	0.586761	1	0.728196	0.901235
A0A1W2PPD8	0	0	0	0	0	1	0	0	0	0	0	0	0	0.357212
A0A1W2PPH1;P23368	0.0604152	0.101911	0.0422087	0.0495926	0.0609757	0.0386214	0.0616269	0	0.096783	0.156998	0.672687	1	0.741066	0.56099
A0A1W2PPH6	0	0	0.41855	0	0	0.0912455	0	0.0895748	0	0	0.510357	1	0.856304	0.601004
A0A1W2PPI5;Q5JSJ4	0	0	0	0	0	0	0	0	0	1	0	0	0	0
A0A1W2PPJ5;J3QT51;J3QT87;Q96SW2;Q96SW2-2	0	1	0	0	0	0	0	0	0	0	0	0	0	0
A0A1W2PPS1;Q00839;Q00839-2	0.595536	1	0.770058	0.533866	0.28886	0.296362	0.231343	0.155403	0.0943394	0.0863461	0	0.114313	0.372564	0.834095
A0A1W2PPV0;A0A1W2PQG5;Q9Y5P2;Q9Y5P2-2
A0A1W2PPZ5;P23193	0.780867	1	0.503891	0.45359	0.328348	0.341948	0.256701	0.206969	0.157533	0.215174	0	0.178373	0.288965	0.065696
A0A1W2PQ75;O15488;O15488-2;O15488-3;O15488-4;O15488-6	0	0	0	0	0.0225505	0.0599507	0.0489772	0.123493	0.106137	0.143836	0.205347	0.280526	0.433418	1
A0A1W2PQD2;Q9UBB4	0.645977	1	0.622014	0.57768	0.385709	0.346147	0.206031	0	0.30237	0	0	0	0	0
A0A1W2PQE7	0	0	0	0	0	0	0	0	0	0	1	0	0	0.422555
A0A1W2PQM2	0.961735	1	0.313161	0.351433	0	0.426623	0.196895	0.247983	0	0	0.431981	0	0	0.311283
A0A1W2PQM3	0.133481	0	0.0746615	0.151025	0.474367	0.760261	0.938518	1	0.588942	0.539775	0.625083	0.55095	0.255725	0.396597
A0A1W2PQM5;A0A1W2PR19;A0A1W2PRG0
A0A1W2PQP6;Q9BWL3;Q9BWL3-2;Q9BWL3-3;Q9BWL3-4;Q9BWL3-5;X6R6F3;X6R6S3	0	0	0	0	0	0	0.338929	0.453526	0.430629	0.329654	0.219615	0.508491	0	1
A0A1W2PQQ5	0	0	0	0	0	0	0	0	0	0	0	0	1	0
A0A1W2PQS6	0	1	0.114314	0.170063	0.181908	0.148042	0.229368	0.226655	0.386843	0.425063	0.37171	0.707163	0.757453	0.303289
A0A1W2PR09;A0A1W2PRL5;A0A1W2PRM0;F5GYH1;Q8NC96	0.334015	0.827805	0.371773	0.329569	0.0542989	0.199543	0.439043	0.0700984	1	0	0.29506	0.180135	0.463122	0.258327
A0A1W2PR17;F2Z2I2;Q16875;Q16875-2;Q16875-3;Q16875-4;Q5VX20;Q5W015	0.744356	1	0.53771	0.578289	0.294725	0.354534	0	0	0	0	0	0	0	0
A0A1W2PR28;A0A1W2PRJ5;A0A6Q8PFR7;Q5JU85;Q5JU85-3	0	0	0	0	0.309605	1	0	0.225364	0.901012	0.264937	0	0	0	0
A0A1W2PR46;A0A1X7SBR3;P14136;P14136-2;P14136-3	0	0	0	0	0	0	0	0	0.0848482	0.271628	0.265127	0.222135	0.195099	1
A0A1W2PRB8
A0A1W2PRI9;E9PNW5	0	0	0	0	0	0	0	1	0	0	0	0	0	0
A0A1W2PRW4;P53816	0.607901	1	0.861305	0.505632	0.482213	0.215567	0.182094	0.399991	0.852253	0	0	0	0	0
A0A1W2PS05;Q8NEB9	0.572154	0.862913	1	0.692156	0.641184	0.474579	0.221908	0.11499	0.233524	0.153708	0.0397315	0.265599	0	0.209707
A0A1W2PS43;Q14108	0.179881	0	0.0255401	0.0304095	0.175694	0.406454	0.573387	0.809555	1	0.771123	0.769447	0.463642	0.415651	0.552792
A0A1W2PS52
A0A1W2PS94;A0A2R8Y358;Q9BXT5	0	0	1	0	0.540915	0	0	0	0	0	0	0	0	0
A0A1X7SBT1;Q9H1D0;Q9H1D0-2	0.179628	0.114503	0.118985	0	0.0535982	0.0311607	0	0	0.0274528	0.237714	0.557309	1	0.631109	0.536404
A0A1X7SBY3;H0Y860;Q9P246;Q9P246-2	0	0	0	0	0	0	0.711357	0.653314	1	0	0	0	0	0
A0A1X7SBZ2;A0A5H1ZRQ2;Q92841	0.0236059	0	0.0987128	0.199275	0.256793	0.421679	0.434622	0.487842	0.562692	0.51118	0.623883	0.64188	0.656775	1
A0A1Y0BRN3;A0A590UJ40	0.74284	0.8251	0.604818	0.451081	0.0967022	0.137607	0.140008	0.299181	0.549243	0.537189	0.450145	0.411523	0	1
A0A286YEV4;A0A286YEV9;A0A286YEW8;A0A286YEX1;A0A286YF00;A0A286YF45;A0A286YF51;A0A286YF73;A0A286YFC6;A0A286YFE7;A0A286YFF5;A0A286YFH9;A0A286YFM2;B7Z2B2;E7ERQ4;Q8NHS3	0	0	0	0	0	0	0	0.302027	1	0	0	0	0	0
A0A286YEX4;P08651;P08651-5;P08651-6	0.0731548	0	0.0529484	0.0281311	0.0362158	0.0352019	0.0342891	0.0400653	0.043418	0.10454	0.144441	0.37856	0.163117	1
A0A286YF17;A0A286YFD0;P42898;P42898-2;Q5SNW7	0.686155	1	0.556581	0.375858	0.216547	0.184527	0.144589	0.167513	0.0446144	0	0	0	0	0
A0A286YF22;O43175	0.580316	1	0.738412	0.542583	0.355441	0.261179	0.248288	0.149509	0.124538	0.0618234	0.0214594	0	0.024475	0.00260971
A0A286YF37;Q9UK22	0.926526	0	0	0	0.971786	0	0	1	0	0	0	0	0	0
A0A286YFA5;Q8NGQ1
A0A286YFE3;A0A286YFF7;A0A286YFL8;A0A2C9F2P4;P50897;Q5T0S4	0.244328	0	0	0	0.214832	0.240246	0.35648	0.706713	0.933477	0.769184	0.827829	0.539745	0.557165	1
A0A286YFF8;Q7Z3U7;Q7Z3U7-2;Q7Z3U7-5;Q7Z3U7-6	0.63003	1	0.727833	0.602559	0.342372	0.250627	0.149908	0.125394	0.16048	0.111841	0.0297072	0	0.0230349	0.0140756
A0A2Q2TTZ9;P01593;P01594
A0A2Q3DQE3;Q13555;Q13555-10;Q13555-11;Q13555-2;Q13555-3;Q13555-4;Q13555-5;Q13555-6;Q13555-7;Q13555-8;Q13555-9;Q5SWX3;Q8WU40	0	0	0	0	1	0	0	0	0	0	0	0	0	0
A0A2R8Y2A8	0.583157	1	0.677953	0.522237	0.171365	0.168622	0.0765598	0	0.0353227	0.199677	0.430584	0.441702	0.558446	0.249981
A0A2R8Y2F6;P42336	0.0794566	0.128904	0.0688158	0.226034	0.0509068	0.0521051	0.0293165	0	0.0640834	0.0363118	0.0953192	0.773246	0.29496	1
A0A2R8Y3M9	0.0747259	0	0.0670234	0	0.19259	0.537353	0.859862	1	0.404929	0.252008	0.533472	0.43893	0.461327	0.447359
A0A2R8Y3N3;A0A2R8Y5P7;A0A2R8Y6I1;P49590;P49590-2	0	0	0	0	0	0	0	0.12935	0	0.250356	1	0.938486	0.565858	0.551799
A0A2R8Y3S0;A0A2R8Y511;A0A2R8YCL0;Q96JX3	0	0	0	0	0	0	0	0	0	0	1	0	0	0
A0A2R8Y440;A0A2R8Y4P4;A0A2R8Y7S2;A0A2R8YG32;A0A2R8YGG3;P51532;P51532-2;P51532-3;P51532-4;P51532-5;Q9HBD4	0	0	0.0288764	0.0528553	0.0289124	0.0336248	0.0652098	0.0435824	0.0505144	0.071094	0.118114	0.227058	0.123374	1
A0A2R8Y455;A0A2R8Y600;A0A2R8Y620;A0A2R8Y7U2;Q86VX2;Q86VX2-2	0.328294	0.561769	0.375073	0.57236	0.719449	1	0.864826	0.744467	0.581249	0.190115	0	0.0806544	0.554639	0.435976
A0A2R8Y471;Q12967;Q12967-2;Q12967-3;Q12967-4;Q12967-5;Q12967-6;Q5T7U6	0	0	0	0	0	0	0	1	0	0	0	0	0	0
A0A2R8Y478;A6NNI4;G8JLH6;P21926	0	0	0	0	0	0	0	0	1	0.507743	0	0	0	0
A0A2R8Y484;Q08722;Q08722-2;Q08722-3;Q08722-4
A0A2R8Y491;E7EWD9;O95718;O95718-1;O95718-2	0.447228	1	0.504999	0.333921	0.0883895	0.115334	0.088899	0	0.0169388	0.127517	0.157955	0.195699	0.22631	0.253766
A0A2R8Y4C2;A0A2R8Y596;A0A2R8Y5C9;A0A2R8Y5E4;A0A2R8Y6M6;A0A2R8Y8C4;A0A2R8YFK2;A0A2R8YFS8;P56945;P56945-2;P56945-3;P56945-4;P56945-5;P56945-6;P56945-7;P56945-8	0.681267	1	0.681492	0.321302	0.227457	0	0	0	0	0	0	0	0	0
A0A2R8Y4F5	0	0	1	0	0	0.0579899	0	0	0	0	0	0	0	0
A0A2R8Y4I8;A0A2R8Y7K2;A0A2U3TZR0;Q9UBP0;Q9UBP0-2;Q9UBP0-3;Q9UBP0-4	0.422154	0	0.193318	0.24701	0.365629	0.284189	0.416254	0.337006	0.296504	0.269794	0.474141	0	1	0.490011
A0A2R8Y4K2;Q9Y2S2	0.811692	1	0.598454	0.517685	0.313672	0.183374	0.0985876	0.0699249	0.0716294	0.0346969	0.0110479	0	0.00483039	0.00498538
A0A2R8Y4M1;A0A2R8Y615;A0A2R8YGW2;A0A5F9ZHK1;Q9NZA1;Q9NZA1-2;Q9NZA1-3	0	0	0	0	0	0	0	0	1	0	0	0	0	0.642145
A0A2R8Y4T1	0.193794	0.121873	0.0650105	0.0231003	0.0386173	0	0.0836539	0.243443	0.442982	0.536039	0.714029	0.543768	0.559292	1
A0A2R8Y4U1;A0A2R8YDF7;O75164	0	0	0	0	0	0	0	0	0	0	0	0	0	1
A0A2R8Y4U4	0	0	0	0	0.285402	0	0	0.286164	1	0	0	0	0	0.554813
A0A2R8Y4V0;A0A2R8Y4Z4;A0A2R8Y5D8;A0A2R8Y6Q0;A0A2R8YDG0;Q09428;Q09428-2	0	0	0	0	0	0.212425	0.0831194	0.154539	0.209264	0.511676	0.871541	1	0.762618	0.831314
A0A2R8Y4W0
A0A2R8Y4W1;A0A2R8Y860;A0A2R8YD46;A0A2R8YFE3;A0A2U3TZS7;P43004;P43004-2	0.178264	0	0.0824724	0.0386332	0.193025	0.266842	0.315281	0.58408	0.672206	1	0.729276	0.901923	0.38188	0.914362
A0A2R8Y4W2;A0A2R8YE63;Q12929	0.481096	1	0.111492	0.34491	0.122803	0.0148948	0	0.0498197	0.0393613	0.00240245	0.0148617	0.0704073	0.004085	0.118704
A0A2R8Y4Y7;A0A2R8YFW4;Q9UQ90	0	0	0	0	0.0122247	0.0479538	0.0878651	0.136729	0.23476	0.429859	0.80609	1	0.545784	0.423173
A0A2R8Y4Z0;A0A2R8Y7W5;A0A2R8YF61;Q14004;Q14004-2	1	0.747228	0.595931	0.900592	0.624796	0.265494	0.602579	0.375608	0.377934	0.172061	0	0	0	0
A0A2R8Y4Z8	0.421484	0.253466	0.485709	0.774176	0.893991	0.824855	0.651314	0.47396	0.367404	0.361782	0.0189215	0	0.455226	1
A0A2R8Y524;A0A2R8YEC9;E9PFW2;O00462	0.163518	0.264817	0.25708	0.316055	0.231965	0	0.336202	0.267665	0.57782	0.537588	0.806474	0.947303	0.828252	1
A0A2R8Y543;A0A2R8Y5A3;A0A2R8Y804;A0A2R8YCH5;B4DGU4;P35222	0.104304	0.041717	0.00964091	0.00313603	0	0.0399617	0.117234	0.259916	0.487322	0.574803	0.653738	0.694638	0.214522	1
A0A2R8Y544;Q9BR61	0.750366	1	0.936819	0.906956	0.742832	0.192921	0	0.24666	0	0	0	0	0	0
A0A2R8Y549;Q8NI35;Q8NI35-2;Q8NI35-3;Q8NI35-4	0.592838	0.537206	0.0016562	0	0.107714	0.242759	0.47394	0.310637	0.234869	0.451265	0.685308	0.947173	0.599783	1
A0A2R8Y566;Q9P260-2	0.678473	0.898951	1	0.903433	0.478194	0.32712	0.172524	0.149612	0.159891	0.176063	0.130131	0	0.0798459	0.194328
A0A2R8Y595;A0A2R8YFL0;P49711	0	0	0	0	0.0284588	0	0	0.0367734	0.0923668	0	0.0512983	0.149203	0.230933	1
A0A2R8Y5A0;A0A2R8YD58;E7EU96;P68400	0.652256	0.891697	1	0.510407	0.315127	0.128668	0.243473	0.0748594	0.159038	0.046597	0.189418	0.259313	0	0.797118
A0A2R8Y5D3;A0A2R8YEZ4;O15160;O15160-2	0.513266	0.61458	0.596726	0.65195	0.447749	0.281586	0.830604	0.126345	0.276767	0	0	0	0	1
A0A2R8Y5F1;A0A2R8Y7C8;A0A2R8Y7X5;A0A2R8YDR3;A0A2R8YDZ2;A0A2R8YGD6;A0A2R8YGU4;H3BMQ0;P49815;P49815-2;P49815-3;P49815-4;P49815-5;P49815-6;P49815-7;X5D2U8	0.201564	0.151317	0.510139	0.366795	0.173917	0.320534	0.237934	0.12445	0	0.173292	0.382419	0.237206	0.00946099	1
A0A2R8Y5J4;Q9BYG8
A0A2R8Y5K2;Q96LT7	0	0	0.457749	0.712974	0.393997	0	0.320521	0	1	0	0	0	0	0.554675
A0A2R8Y5N2;A0A2R8Y5S3;A0A2R8YFV7;Q92574;Q92574-2	0.0915331	0.0967031	0.197819	0.0750237	0.0427155	0.0411529	0.0188616	0.0261704	0.0619846	0.0734641	0.0714789	0	0.499966	1
A0A2R8Y5P9;Q8TF72
A0A2R8Y5Q8;A0A2R8YHI9;Q15813;Q15813-2	0.049803	0.0404366	0.0244137	0.0248577	0.015726	0.00918934	0.00805618	0.0190137	0.0267859	0.0338129	0	1	0.63245	0.127118
A0A2R8Y5Y7;D6RAN4;P32969	0.0377148	0	0.0683745	0.13595	0.185349	0.20779	0.262002	0.347627	0.391595	0.540036	0.782818	0.781334	1	0.673696
A0A2R8Y605	0	0.500877	0	0.429734	0.246041	0.470137	0	0.0977697	0.552451	1	0	0	0.896169	0
A0A2R8Y635;A0A2R8YDN7;Q9H7F0;Q9H7F0-2
A0A2R8Y640	0	0	0	0	0.987228	1	0.422992	0.117763	0	0	0.936008	0.725385	0	0
A0A2R8Y648	0.558215	1	0.632307	0.340758	0.176811	0.161822	0.0987759	0.0966039	0.0589799	0.0628327	0	0	0	0
A0A2R8Y653;Q9BZX2	0.35082	0.656088	0.432665	0.346017	0.216275	0.222533	0.30052	0.145896	0.068044	0	0.121172	0.47349	1	0.189398
A0A2R8Y661;A0A2R8YGD3;Q9Y4G8	0.362987	0	0.709383	0.588278	0.586614	0.372786	0.773134	0.472116	0.220321	0.206809	0	0	0	1
A0A2R8Y6D0	0	0	0	0	0	0	0	0	0.633201	0.856361	0.950594	0	0	1
A0A2R8Y6I6;A0A2R8Y6L5;A0A2R8YDF3;Q13627;Q13627-2;Q13627-3;Q13627-4;Q13627-5	0.829064	0.8062	0.903496	1	0.463144	0.180238	0.239749	0	0	0.235868	0	0	0	0
A0A2R8Y6P2;A0A2R8YDC4;A6NFE3;C9J654;J3KR48;J3KR52	0	0.298174	0	0	0	0.00405551	0.339806	1	0	0	0	0	0	0
A0A2R8Y6W8;P19447	0	0	0	0	0.0729248	0.0526746	0	0.0695412	0.175305	0.0904684	0.228015	0.240618	0.165054	1
A0A2R8Y6Y7;A0A2R8YDQ9;Q9P2R7;Q9P2R7-2	0.0981908	0.150928	0.102016	0.061352	0.00735205	0.00339708	0.00357408	0	0.0283887	0.11822	0.724687	1	0.733018	0.562497
A0A2R8Y783	0	0.10993	0	0.192338	0	0	0.307896	0.48639	0.790633	1	0.274985	0	0.37587	0.390538
A0A2R8Y7B4	0.911349	0	0.934809	0.703853	1	0	0.703345	0	0	0	0	0	0	0
A0A2R8Y7D5	0	0	0	0	0	0	0	1	0	0	0	0	0	0
A0A2R8Y7E6;A0A5F9ZHX3;A0A5F9ZI57	0	0	0	0	0.628283	0.669105	0	1	0	0	0	0	0	0
A0A2R8Y7I9;A0A2R8Y855;A0A2U3TZQ7;B4DGM3;J3QKS7;Q969G3;Q969G3-2;Q969G3-4;Q969G3-5	0.0505343	0.098016	0.12345	0.0625161	0.0989696	0.0514504	0.040553	0	0.0206744	0.032701	0.0480177	0.145166	0.152835	1
A0A2R8Y7P6;A0A5F9ZHW5;F8VQP2;Q99700;Q99700-4;V9GY86	0.447859	1	0.710279	0.611733	0.500098	0.224422	0.34653	0.354899	0.327275	0.34679	0.265602	0.104996	0.369601	0
A0A2R8Y7Q1;E7ETD6;E9PE19;F5GXF5;Q12830;Q12830-2;Q12830-4	0	0	0	0	0	0	0	0	0	0	0	0	0	1
A0A2R8Y7R4;B2RUZ4;H3BS66	0.445117	0	0.35987	0.515395	1	0.918714	0.885663	0.878997	0.696541	0.726652	0.471534	0.584461	0.262194	0.57173
A0A2R8Y7T6;A0A3B3IRZ4;Q6DN90;Q6DN90-3	0.542342	1	0.57761	0.54153	0.143715	0.224112	0.0703552	0.0928467	0.331335	0.169974	0.061633	0.230041	0	0.403928
A0A2R8Y7U0;H0Y770;O75140;O75140-1;O75140-4;O75140-9	0	0	0	0	0.602437	0.416133	0.656828	0.769297	0.986974	0.283858	0.64922	0	1	0
A0A2R8Y7V5;H0Y850;P38398;P38398-4;P38398-7;P38398-8;Q5YLB2	0	1	0	0.541976	0	0	0	0	0	0	0	0	0	0
A0A2R8Y7X9;P69891;P69892	0	0	0	0	0	0.394025	0	0.257917	0	0	1	0	0.591349	0.677698
A0A2R8Y7Y4;Q8N8A2;Q8N8A2-2;Q8N8A2-4	0.72773	1	0.601022	0.727417	0.471995	0.419304	0.266209	0.441954	0.113194	0	0	0	0	0
A0A2R8Y811;P62263	0.0292969	0	0.182893	0.148905	0.230016	0.260072	0.402372	0.642841	0.571855	0.687032	0.895128	1	0.835207	0.4335
A0A2R8Y840;Q9HCK8;Q9HCK8-2	0	0	0	0.24137	0	0	0	0	0.208126	0	0	0	0.193313	1
A0A2R8Y849;A0A2R8Y8A0;A0A2R8YD14;E7ETK0;P62847;P62847-2;P62847-3;P62847-4	0	0	0.244863	0.175765	0.184757	0.193799	0.196601	0.316872	0.317295	0.436328	0.547689	1	0.459389	0.525796
A0A2R8Y851;P62273;P62273-2	0	0	0	0	0	0.130638	0.188426	0.781688	0.169142	0.165225	0.604173	0.620694	1	0.0233728
A0A2R8Y852;A0A2R8YDI1;P39880;P39880-2;P39880-3;P39880-4;P39880-5;P39880-6	0	0	0	0	1	0	0	0	0	0	0	0	0	0
A0A2R8Y880;Q7Z6E9;Q7Z6E9-2	0.648498	0.96157	0	0	1	0.491316	0.280199	0	0.27127	0	0	0	0	0
A0A2R8Y8E0;A0A2U3TZI2;H7C560;P15056	0.80977	1	0.539367	0.392735	0	0	0	0	0	0	0	0	0	0
A0A2R8YCJ8;Q5T2H3;Q9NVV5;Q9NVV5-1;Q9NVV5-3	0	0	0.162193	0	0.155343	0.0748751	0.396799	0.303744	0.153208	0.165061	0.268771	1	0.275815	0.22672
A0A2R8YCL1;Q13322;Q13322-3;Q13322-4	1	0.741465	0.406924	0.49208	0.440895	0.539801	0.542281	0.396179	0.34263	0.188187	0	0	0	0.381243
A0A2R8YCS7;Q9Y3Z3	0.529783	1	0.903703	0.587596	0.379518	0.346924	0.366602	0.238443	0.292719	0.272059	0	0.0819192	0.127606	0.17479
A0A2R8YCV2;Q8NCS4
A0A2R8YD30;P11171;P11171-2;P11171-3;P11171-4;Q4VB86	0.528494	0.624929	0.266888	0.313734	0.0451727	0	0.131102	0.384242	0.451786	0.852619	0.623925	0.613908	0.484933	1
A0A2R8YD49;A0A2R8YDU7;A0A2R8YEX0;Q9H1P3;Q9H1P3-2	0	0	0	0	0	0	0	0	1	0	0	0	0	0
A0A2R8YD63;Q92547	0.470039	0.445592	1	0.433988	0.625263	0.115371	0	0	0	0.190708	0	0	0	0
A0A2R8YD85;Q96BY6;Q96BY6-3	0	0	0	0	0	0	0	0	0	1	0	0	0	0
A0A2R8YDB8;H7BXF5;Q9H0E3;Q9H0E3-3	0.36781	0.39253	0.17988	0.331679	0.248285	0.231727	0.186469	0.306598	0	0	0	0	0.678344	1
A0A2R8YDD5;P30531	0	0	0.156206	0.110429	0.186786	0.166268	0.359889	0.676207	0.838518	1	0.925577	0.592189	0.526613	0.578742
A0A2R8YDI5;O94823;O94823-2;O94823-3	0	0	0	0	0	0	0	0	0	0	0	1	0	0
A0A2R8YDL0;O75443	0.307753	1	0.268883	0	0.361476	0.358378	0	0.173055	0.264163	0.0128216	0.519145	0	0	0.128603
A0A2R8YDQ0;Q9H267	0.616229	0.332179	1	0.560372	0.526294	0.376852	0.463453	0.284798	0.389612	0.243209	0	0.0779231	0.142049	0.0244558
A0A2R8YDR8;Q9BZD2;Q9BZD2-2
A0A2R8YDT1;P15104	0.5729	0.87546	1	0.788063	0.487736	0.471177	0.318824	0.24556	0.175568	0.0883105	0.0459524	0.0354403	0.0484231	0
A0A2R8YE10;Q9NRW7	0.251298	0.325683	0.12721	0.202797	0.494297	0.786029	0.620547	0.655442	1	0.643796	0.231205	0.403911	0	0.390087
A0A2R8YE69;P0CG41;Q8IX94	0	1	0	0.941063	0.196323	0	0	0	0.317537	0	0	0	0	0
A0A2R8YE77;A0A2U3TZM1;O14936;O14936-3	0.13963	0.0670342	0.0210338	0.0341043	0	0.0301039	0.119675	0.44079	0.862399	0.624784	0.742836	0.677672	0.311372	1
A0A2R8YEA1;B5MCJ9;O15016;O15016-2	0	0	0	0	0	0	0	1	0	0	0	0	0	0
A0A2R8YEH1	0	0	0	0	0	0	0	1	0	0	0	0	0	0
A0A2R8YEI5;P52757;P52757-9	0.901185	1	0.9286	0.920484	0.75211	0.495821	0.897201	0.454022	0.480771	0	0	0	0	0
A0A2R8YEL6
A0A2R8YEM2;D6RG18;D6RHI7;P51946	0	0	0	0	0	0	0	0	0	0	0	0	1	0.958626
A0A2R8YEM9;O15050	0	1	0.322798	0.0610585	0.378511	0.0875705	0	0.154083	0.0492567	0	0	0	0	0
A0A2R8YEZ0;B7WP89;Q0P651;Q0P651-2;Q0P651-3;Q0P651-4	0	0	0	0	0	0	0	0	0	0.241795	0.618533	1	0.810597	0.366795
A0A2R8YF49	0.526362	0.405954	0.375618	0.407945	0.489475	0.376168	0.343554	0.621368	0.568903	0.342362	0.0822995	0	0.192752	1
A0A2R8YF72;A0A3B3IRF0;A0A3B3IRT9;A0A3B3IRX5;A0A3B3ISI4;A0A3B3ISW5;A0A3B3ITJ8;A0A3B3ITL3;A0A3B3ITS6;A0A3B3IUE2;H7BYU4;Q9UL68;Q9UL68-4	0	0	0	0	0	0.0107111	0.0275411	0.111299	0.289439	0.191203	1	0	0.587413	0.309797
A0A2R8YFG2;Q96T66	0	0	0	0	0	0	0	0	0	0	0.759138	0.967976	1	0.53782
A0A2R8YFH5;Q15437	0.653395	0.87877	0.941245	1	0.726537	0.705184	0.464449	0.359742	0.310809	0.182037	0.0717259	0	0.00116782	0.0250661
A0A2R8YFN3;A1Z1Q3;A1Z1Q3-1	1	0.977011	0.70579	0.337022	0.187745	0.111855	0	0.143977	0.189925	0	0	0	0	0
A0A2R8YFN7	0	0	0	0	0	0	0	1	0	0	0	0	0	0
A0A2R8YFW3;O60907;O60907-2	0.497128	1	0.720713	0.428821	0.207272	0.168047	0.317181	0.201271	0.116411	0	0.0257502	0.180895	0.247025	0.385626
A0A2R8YG42;B1ALK7;Q14155-1;Q14155-5	0.473361	0.889159	0.798267	1	0.859682	0.469077	0.369565	0.338909	0.300016	0.235346	0.0117967	0	0.165571	0.31416
A0A2R8YGH5;H7C1E4;P61966	0.0952124	0	0.0146688	0.147817	0.472986	1	0.615618	0.738519	0.38757	0.275038	0.230776	0.189831	0.187328	0.223192
A0A2R8YGW0;P51795;P51795-1
A0A2R8YHG5;Q9BZV2	0	0	0	0	0	0	0.106797	0.551434	1	0.998761	0.805239	0.526395	0.398933	0.454564
A0A2U3TZH3;Q05639	1	0.634555	0.714569	0.675094	0	0.566933	0	0	0.780442	0.994672	0.951856	0	0.567774	0.804245
A0A2U3TZK7	0	0.0890411	0.0808466	0	0	0	0	0	0.0159612	0	0.459778	1	0.635753	0.257709
A0A2U3TZL5;E9PNW4;P13987;P13987-2	0.145784	0	0.216016	0.240961	0.212309	0.290924	0.504781	0.681027	0.516846	1	0.674142	0.320477	0.254501	0.928752
A0A2U3TZT9
A0A2U3TZU2;P06744	0.818432	1	0.731965	0.642288	0.376548	0.232777	0.200393	0.172219	0.116036	0.0798945	0.0133325	0.00335406	0.00723628	0
A0A2U3TZV8;Q4KWH8;Q4KWH8-2;Q4KWH8-3;Q4KWH8-4	0	0	0	0	0	0.177484	0.311724	0.112946	0.39719	0.41804	0	1	0	0.573418
A0A2Y9D025;P56556;R4GN43	0	0	0	0	0	0.0269472	0.0643561	0.147035	0.251648	0.324232	0.858002	1	0.537898	0.727966
A0A384DVU0;Q8IY17;Q8IY17-2;Q8IY17-3	0.114067	0	0.0777052	0.0779258	0.22969	0.519081	0.596477	1	0.993164	0.726847	0.565204	0.52942	0.566937	0.456309
A0A3B3IRE4;Q8TCE6;Q8TCE6-2	0	0	0	0	0.0415874	1	0.553535	0.384871	0	0	0	0	0	0
A0A3B3IRI9;A0A3B3IRJ3;A0A3B3IRV1;A0A3B3IRZ0;A0A3B3IS37;A0A3B3IS68;A0A3B3ISJ4;A0A3B3IT04;A0A3B3IT30;A0A3B3ITZ3;A0A3B3IU52;A6NFW1;A6NGJ7;Q9BY41;Q9BY41-4	0.410643	1	0	0	0	0	0	0	0	0	0	0	0	0
A0A3B3IRJ9;Q9Y2H2	1	0	0	0.447527	0.613361	0.359884	0.374333	0.278004	0.296877	0	0	0	0	0
A0A3B3IRK5;Q9H2D1	0	0	0	0	0	0	0	0	0	0	0	0.742924	0	1
A0A3B3IRL2;O75629	0	0	0	0	0.171872	0	0	1	0.238831	0.826528	0.94975	0	0.177607	0
A0A3B3IRL5;C9J381;P20839;P20839-2;P20839-3;P20839-4;P20839-5;P20839-6;P20839-7	0	0	0.681736	1	0.623836	0.418711	0.42389	0.504286	0.351746	0.37377	0	0	0.209202	0
A0A3B3IRM7
A0A3B3IRN8;A0A3B3ITX0;P24311	0.00843968	0	0.00153864	0.00369226	0.00962472	0.036861	0.0533053	0.154189	0.239426	0.187952	0.700597	1	0.403329	0.714248
A0A3B3IRP9	0	0	0	0	0	0	0	0	1	0	0	0	0	0
A0A3B3IRR1;A0A3F2YNY7;P08397;P08397-2	0.923085	1	0.524547	0.550567	0.343611	0.195163	0.220497	0.0860969	0.0692486	0.0338034	0.000889131	0	0.00888882	0.00971153
A0A3B3IRS4;A0A3B3IRX3;A0A3B3IS46;H0YHC1;Q71F56	0.843463	1	0	0	0	0	0	0	0	0	0	0	0	0
A0A3B3IRT8;C9IZQ1;C9J3L8;C9J5W0;E9PAL7;P43307	0.0181378	0	0.00472943	0.014406	0.042215	0.0883896	0.110836	0.155203	0.221363	0.402658	0.615757	0.991521	1	0.632145
A0A3B3IRU6;A0A3B3ISL2;Q9GZU2;Q9GZU2-2;Q9GZU2-4	0	0	0	0	0	0	1	0	0	0	0	0	0	0
A0A3B3IRY8
A0A3B3IRZ5;Q8IYE1	0	0	0	0	0	0	0	0	0	0	0.572247	1	0.381674	0
A0A3B3IS06;E7ETY2;Q13428-3;Q13428-7;Q13428-8	1	0.787829	0.637769	0.251993	0	0.0355285	0.119997	0.112149	0.0044504	0.045334	0.163835	0.0872895	0.32168	0.474808
A0A3B3IS13
A0A3B3IS24;C9JIR6;O75688;O75688-2;O75688-4	0.709259	1	0.612756	0.717859	0.326962	0.213194	0.185447	0.178758	0.120792	0.0609331	0	0	0	0
A0A3B3IS40;A0A3B3ISE6;A0A3B3IT25;A0A3B3ITA8;A0A3B3ITA9;A0A3B3ITE7;A0A3B3ITJ7;B3KV94;Q9UGL1;Q9UGL1-2	0.973617	1	0	0.982222	0.650992	0	0	0	0	0	0	0	0	0
A0A3B3IS62;A0A3B3ITD6;A0A3B3ITI5;Q9Y672;S4R350	0	0	0	0	0	0	0	0.225423	0.181783	0.516638	1	0.924945	0	0
A0A3B3IS71;P06400	0	0	0	0	0	0	0	0.26986	0.0975507	0	0	0	0.562544	1
A0A3B3IS75;K7EIP0;K7EJD9;K7ESF2;P13686
A0A3B3ISF0;Q659C4;Q659C4-2	0	0	0	0	0.408241	0.510169	0.81943	0.467038	0.342794	0.511907	0	0.457072	1	0
A0A3B3ISF9;P42892;P42892-2;P42892-3;P42892-4	0.258531	0	0.331954	0.458074	0.784715	1	0.834016	0.690873	0.736747	0.594809	0.422415	0.484235	0.397676	0.676786
A0A3B3ISG5;P14735	0.692103	1	0.942683	0.590429	0.182949	0.102041	0.044779	0	0.0869078	0.0843968	0.209089	0.20719	0.138778	0.039432
A0A3B3ISG8	0.027599	0	0	0	0.0109312	0.0297255	0.0455108	0.166909	0.136379	0.28108	0.789061	1	0.490087	0.532482
A0A3B3ISH6;Q86U38;Q86U38-2	0	0	0	0	0.306893	0.251953	0	0	0.307965	0.389229	0	0	0	1
A0A3B3ISJ2;Q96KQ4	0.799809	0.904557	0.646443	0.416606	0.217472	0	0.0828151	0.297882	0.110312	0.286458	0.301358	0.430688	0.952254	1
A0A3B3ISK7;Q6PI48	0.134583	0	0.0978043	0.0744987	0.0830432	0.0772249	0.0674854	0.0763185	0.0842051	0.0971259	0.65889	1	0.643443	0.516297
A0A3B3ISP1;A0A3B3ITU5;Q92625;Q92625-2	0	0	1	0	0	0	0	0	0	0	0	0	0	0
A0A3B3ISQ4;Q9H6S3	0.757148	1	0.802839	0.724484	0.421588	0.363292	0.382568	0.281112	0.271429	0.247685	0.105989	0.01128	0	0.0440174
A0A3B3ISR2;B4DPQ0;P00736	0.236169	0	0.0642621	0.00701231	0.208259	0.523078	0.951297	1	0.825864	0.201779	0.455542	0.411278	0.0179361	0.163345
A0A3B3ISR7;E9PIF2;Q13206	0	0	0	0	0	0	0	0	0	0	0	0	0	1
A0A3B3ISS6	0	0	0	0	0	0	0	0	0	0	0	0	0	1
A0A3B3IST1;B5MD23;O75954	0	0	0	0	0	0	0	0	0	0	0	1	0	0
A0A3B3ISU0;Q02487	0.210314	0	0	0	0	0	0	0.15236	0.179919	0.467845	0.419833	0.534292	0.235679	1
A0A3B3ISV3;P02462	0.0156819	0	0	0	0	0	0	0.00785626	0.0438276	0.141873	0.248559	0.304993	0.18083	1
A0A3B3ISV4	0	0	0	0	0.122062	0.668781	0.288006	1	0.511886	0.522721	0	0	0	0
A0A3B3ISV5;Q8N9N7	1	0	0	0.367539	0.308243	0.52081	0.474738	0.616704	0.556455	0.455958	0.568371	0.189849	0.0682249	0.427952
A0A3B3ISV8;A0A6Q8PF19;A0A6Q8PFS9;A0A6Q8PHH0;Q8IZF0	0	0	0	0	0	0	0	1	0.202595	0	0	0	0	0
A0A3B3ISV9;O43414	0.480932	1	0.306018	0.406189	0.308851	0.102019	0	0.212275	0.123412	0.116118	0.0675827	0.149268	0.251231	0.321795
A0A3B3IT21	0	0	0	0	0	0	0	0	0	1	0	0	0	0
A0A3B3IT28;A0A3B3ITE5;A0A3B3ITF7;A0A3B3ITW6;A0A3B3IU40;A0A3B3IUA1;A0A3F2YNW9;Q12756;Q12756-2;Q12756-3	0.0390702	0	1	0.0868446	0.0115313	0.138402	0.125531	0	0	0.11765	0	0.902008	0	0
A0A3B3IT31;Q9NUN5;Q9NUN5-3	0	0	0	0	0.437813	0.635993	0.506726	0.924635	1	0.765092	0	0	0	0
A0A3B3IT37;Q5SXQ3;Q5SXQ5;Q8IYK4	0	0	0	0	0	0	0	0	0	0	0.00353718	1	0.353212	0
A0A3B3IT92;P33991	0.452161	1	0.90163	0.647962	0.395496	0.211093	0.123054	0.0394867	0.102811	0.00148953	0	0.175165	0.621141	0.356797
A0A3B3ITH3;Q9P2X3	1	0.973515	0.710868	0.691323	0.397196	0.292641	0.254874	0.267242	0.156569	0.208799	0	0	0	0
A0A3B3ITK0;P35442	0.663841	1	0.814386	0.524069	0.335082	0.235919	0	0.0986313	0.102417	0.164217	0	0	0	0.132598
A0A3B3ITN0;Q86TP1	0.70069	1	0.581462	0.5005	0.291837	0.124873	0.108209	0.106093	0.117072	0	0	0	0.10418	0
A0A3B3ITN6;D6RBB0;O60683;O60683-2	0	0	0	0	0	0	0	0	0.250086	0.568766	1	0.789306	0.509041	0.551016
A0A3B3ITP4;Q495G5;Q8IVH4	0.0163923	0.002687	0.00466618	0	0.00831475	0.00734067	0.0102867	0.0208748	0.0431111	0.21579	0.555229	1	0.491402	0.565623
A0A3B3ITT1	0.551153	0.457736	0.0827236	0.13884	0.237433	0	0.541445	0.194113	0.520979	0.55391	0.910888	1	0.296087	0.423846
A0A3B3ITT5;P47914	0	0	0.0337081	0.0986496	0.104264	0.172228	0.254338	0.411363	0.388432	0.566854	0.573411	1	0.926777	0.503519
A0A3B3ITU8;A0A3B3IU04;A0A3F2YNW8;Q14643;Q14643-2;Q14643-3;Q14643-4;Q14643-5;Q14643-6;Q14643-7;Q14643-8	0.0928322	0	0.0488433	0.0890297	0.21563	0.423692	0.481204	0.711784	0.779688	0.702801	0.947358	0.802643	0.419336	1
A0A3B3ITW1;P49841;P49841-2	0.569532	1	0.587512	0.316097	0.180416	0.0853519	0.0898078	0.0766654	0.142405	0.0803389	0.065158	0	0.0326954	0.203614
A0A3B3IU42;G5EA29;H0YDP6;H0YEL0;O14893;O14893-2;O14893-3	0.642292	0.614464	0.810745	1	0.833821	0.590026	0.756912	0.639905	0.341297	0.190263	0	0	0	0.46114
A0A3B3IU65;A9UHW6;A9UHW6-2;A9UHW6-3;J3KSU6;J3QLD1;J3QLJ5;J3QRZ6	0	0	0.201335	0.582177	1	0.459379	0.572775	0.366076	0	0	0	0	0	0
A0A3B3IU69;F8W717;O00423;O00423-3	0.49196	0.749946	1	0.600794	0.223097	0.291594	0	0.511461	0.541586	0.182709	0	0	0	0
A0A3B3IUA2;B1AHD1;P55769	0	0.00847021	0.01266	0.00342156	0.0176266	0.0164964	0.0156747	0.0281235	0.0164243	0.0279565	0.046729	0.0733578	0.0634815	1
A0A3B3IUB1;Q13144	0.595094	0.940196	1	0.79202	0.365337	0.147234	0.0131322	0.179947	0.175104	0.180226	0	0.049212	0.734632	0.336187
A0A3B3IUB5;Q8TCT9;Q8TCT9-5	0.0821932	0	0.0289911	0.0745095	0.332606	0.666419	1	0.886056	0.861781	0.639526	0.71634	0.680116	0.519619	0.470873
A0A3B3IUC4;A0A6Q8PFA9;P06280	0.0598238	0.224402	0.025081	0.1994	0.0312483	0.0508076	0	0.157696	0.243599	0.313662	0.577178	0.494457	0.797661	1
A0A3B3IUD2;Q9BUK6;Q9BUK6-2;Q9BUK6-3;Q9BUK6-7	0.951373	1	0.680253	0.613132	0.434043	0.380611	0.302655	0.265006	0.217617	0	0	0	0.129599	0
A0A3B3IUD4;P21453	0	0	0	0	0	0	0	0	0	1	0	0	0	0
A0A3B3IUD7;Q14690	0	0	0	0	0	0	0.238596	0.28912	0.166309	0.0834851	0.147295	0.173111	0.166834	1
A0A3Q5ACI7	0	0	0	0	0	0	0	0	1	0	0	0	0	0
A0A494BWY4;Q6IEE7	1	0.738672	0.740746	0	0	0	0	0.442964	0.541676	0.217596	0	0	0	0.454701
A0A494BXY3;E9PLD3;E9PRG8	0	0	0	0	0.765976	0.360619	0.298422	0.710755	1	0	0	0	0	0
A0A494BZU6;A0A494BZW7;A0A494C002;A0A494C0P9;A0A494C0Q2;A0A494C0Q6;A0A494C0W0;A0A494C156;A0A494C1K5;A0A494C1N1;O95453;O95453-2	0.48632	0.936969	0.472543	0.19603	0.213403	0.61795	0	0	0	0	0	0	0	1
A0A494BZV4;A0A494C069;Q08AG5	0	0	0	0	0	0	0	0	1	0	0	0	0	0
A0A494C004;A0A494C0C5;A0A494C0D2;A0A494C0V5;A0A494C141;A0A494C1C6;A0A499FJ53;A6XNE1;F6Y2X3;Q16635;Q16635-2;Q16635-3;Q16635-4;Q16635-5;Q16635-6;Q16635-7;Q16635-8;Q16635-9
A0A494C023
A0A494C028;H0Y993;P35659	0.125608	0.200324	0.0886647	0.0860839	0.0321451	0.00619727	0.0189957	0	0.0346149	0.0529541	0.127618	0.198575	0.249673	1
A0A494C039	0	0	0	0	0	0	1	0.328879	0.614056	0	0	0	0	0
A0A494C066;B7Z4W5;Q16773	0.640218	1	0.892308	0.465633	0.268811	0.159966	0.120414	0.142742	0.00983726	0	0.027155	0.053534	0.0416365	0.0205099
A0A494C068;A0A494C1K7;E9PGP6;Q9UGJ0;Q9UGJ0-2;Q9UGJ0-3	0.77756	0.794541	1	0.878467	0.638461	0.414138	0.685438	0.415994	0.295974	0.233975	0.629877	0.358079	0	0.862456
A0A494C0J7;Q08188	0	0	0	0	0	0	0	0	0	0	0.852613	1	0.38548	0
A0A494C0K7;A0A494C0P0;Q6P2C8;Q6P2C8-2	0	0	0	0	0	0	0	0	0	0	0	0.518336	0	1
A0A494C0M1;P52701	0.45099	0.369939	0.253292	0.139153	0.0635279	0.0540158	0.0718477	0	0.0587615	0.0787141	0.158155	0.193178	0.26919	1
A0A494C0M2;O95925-3;Q9BQY6;Q9BQY6-2	0	0	0	0	1	0	0	0	0	0	0	0	0	0
A0A494C0N4;H9KV93;Q7Z4L5
A0A494C0P1;P04150;P04150-10;P04150-2;P04150-3;P04150-6;P04150-8;P04150-9	0.647403	0.96041	1	0.655259	0.411229	0.294093	0.284851	0.193037	0.152896	0.20582	0	0.0787977	0.152221	0.180853
A0A494C0Q3	1	0	0	0	0.618248	0.467603	0	0	0	0	0	0	0	0
A0A494C0R8	0.0824788	0.153878	0.475519	1	0.665531	0.534307	0.287209	0.259482	0.265074	0.210954	0.0546637	0.0616897	0.112924	0
A0A494C0X7;D3DSM0;P05107	0.136503	0	0	0.145917	0.27425	0.289843	0.6394	0.960077	1	0.871579	0.764798	0.814434	0.404805	0.90603
A0A494C0Z5;Q9H082	1	0	0	0	0.479764	0.558659	0.785547	0.546113	0.680196	0.586398	0.733218	0.926168	0.65583	0.621279
A0A494C105;Q9H3U5;Q9H3U5-3;Q9H3U5-5;Q9H3U5-6	0	0	0	0	0.305393	0.180486	0.364188	0.698523	1	0.811148	0	0.247555	0	0.413256
A0A494C108;Q8N9T8	0	0	0	0	0.258392	0	0	0	0	0	0	0.0359463	0.137925	1
A0A494C115;A0A494C1U4;K7N7A8;P29972;P29972-2;P29972-3;P29972-4	0	0	0	0	0	0	0	1	0	0	0	0	0	0
A0A494C143;Q14689;Q14689-6	0.379774	1	0.456345	0.598681	0.212175	0.361186	0.128582	0.343736	0.392668	0.363267	0.287006	0	0.0742067	0.70679
A0A494C146;P50336	0.13084	0	0	0	0	0.0251393	0.0329773	0.043823	0.0635217	0.243523	0.686347	1	0.639917	0.60659
A0A494C164;P52630;P52630-4	0.698948	1	0.788985	0.713325	0.385952	0.403833	0.236611	0.215924	0.167832	0.148207	0.0110425	0	0.0676356	0.148794
A0A494C165;K7ES25;P12955	0.939346	1	0.657101	0.5267	0.302129	0.270323	0.184522	0.104687	0.126294	0.0471362	0.0298676	0	0.00388146	0.00737198
A0A494C167;Q9UHD2	0.608894	1	0.841876	0.87703	0.342706	0.374832	0.237342	0.248514	0.282205	0.292785	0	0.0644166	0.312268	0.193219
A0A494C193;Q08E93	0	0	0	0.247796	0	0	0	0	0	1	0.525395	0	0	0
A0A494C1C4;P78552;P78552-2	0	0	0	0	0.509448	0.701303	0.588245	1	0	0	0	0	0	0
A0A494C1F2;P35658;P35658-2;P35658-3;P35658-4;P35658-5	0.145108	0.356009	0.247428	0.200274	0.0470615	0.0182224	0	0.037707	0.00954825	0.060179	0.0922975	0.39995	0.539211	1
A0A494C1J1;Q69YQ0;Q69YQ0-2	0.138549	0	0.0371445	0	0.0735093	0.0889151	0.0954916	0.168873	0.336113	0.523883	0.536933	0.293756	0.256844	1
A0A494C1J8
A0A494C1L5;P50851-2	0.705973	1	0.973713	0.807573	0.447102	0.385197	0.181998	0.171317	0.212782	0.103873	0.0385165	0	0.00310732	0.00634547
A0A494C1M4;Q3SY69	0	0.214449	0	0.17868	0.067918	0.200056	0	0	0.0850508	0	0	1	0	0.0405682
A0A494C1N0;P26885	0.0172726	0.0240089	0	0.0505373	0.290648	0.352122	0.816342	1	0.682519	0.485432	0.484419	0.348325	0.475206	0.215639
A0A494C1S7;Q9Y5Q9	1	0.452925	0.678737	0.621551	0.26372	0.40006	0.250831	0.184961	0.181777	0.203342	0	0	0	0.868965
A0A494C1T9;Q6ZRV2	0.165813	0	0.276821	0.208326	0	0.182132	0.23436	0.192781	0.247603	0.359963	0.481013	0.68145	0.47406	1
A0A494C1V1;Q6ZNJ1;Q6ZNJ1-2;Q6ZNJ1-3	0	1	0.35395	0.374827	0.171883	0.276596	0.218414	0.283366	0.17612	0	0	0	0	0
A0A499FI31;Q15020;Q15020-4	0.630324	0.688329	1	0.678733	0.448138	0.228068	0.21764	0.0774829	0.0883651	0.0847872	0.0301994	0	0.257705	0.508476
A0A499FI48;P13667	0.023501	0.00445071	0	0.00622196	0.101243	0.356945	0.807045	1	0.855223	0.457101	0.389945	0.379942	0.379856	0.229034
A0A499FIS5;A0A499FJN1;A0A499FJS1;Q9BUB5;Q9BUB5-2;Q9BUB5-3	0.907174	0.837226	1	0.976254	0.488236	0.451522	0.282223	0.293252	0.281856	0.155834	0	0	0	0
A0A499FIX8;A0FGR8-2;H7BXI1	0	0.094284	0.0983461	0.0669799	0.29901	0.617438	0.578001	0.808898	1	0.715805	0.703044	0.562548	0.488033	0.761614
A0A499FIY8;C9JC07;C9JZL8;Q96S97	0	0	0	0	0	0.18878	0.121513	0.173766	0.462976	0.327981	0.414053	0	0.188018	1
A0A499FIZ0	0.429183	0.565925	1	0.746202	0.528339	0.438581	0.323058	0.32545	0.295548	0.221511	0.0478729	0	0.117738	0.423778
A0A499FJI4;O75592;O75592-2	0.158278	0	0.378277	0.390099	0.285423	0.264311	0.614346	0.696887	1	0.971095	0.77068	0	0.758618	0.849455
A0A499FJM4;P08684	0.0863456	0	0.0495536	0.121382	0.35441	0.775414	0.905396	1	0.943693	0.579327	0.442758	0.334211	0.26449	0.243065
A0A539;A0A589
A0A590PXD8;Q53SF7-3	1	0.951612	0.685023	0.620766	0.472902	0.202859	0.279168	0.53933	0.490678	0.417344	0.249534	0	0.243701	0.0118933
A0A590UIU4;A0A590UJ09;A0A590UJ61;A0A590UJC8;A0A590UJF4;A0A590UJG1;A0A590UJH1;A0A590UJS0;A0A590UJT1;A0A590UK11;A0A590UK42;A0A590UK98;Q5VZ66	1	0.568479	0	0.163344	0.0624695	0.0299617	0.055455	0.0484208	0	0.129657	0	0.980963	0	0
A0A590UJ36;A6NDB9	0.368854	0.383081	0.179882	0.200075	0.0602248	0	0.0821785	0.287695	0.47023	0.643235	0.551247	0.253379	0.384981	1
A0A590UJ43;P48729;P48729-3;U3KPX3	0.353415	0.933653	0.818592	0.52689	0.138914	0.25922	0.0259461	0.0962157	0.48673	0.393531	0.426478	0.848103	0	1
A0A590UJ46
A0A590UJ50;A0A590UJR3;Q13616	0.555502	1	0.852214	0.633261	0.40601	0.410223	0.250182	0.292371	0.227175	0.145377	0	0.0121614	0.141235	0.218918
A0A590UJ62;E7ETH1;Q14003
A0A590UJ68;A0A590UJR5;A0A590UJS9;A0A590UKA8;Q12959;Q12959-3;Q12959-5;Q12959-6;Q12959-7	0.0935786	0	0.0494934	0.0483898	0.0208451	0.0542856	0.146944	0.464955	0.501471	0.747604	0.71696	0.522418	0.467884	1
A0A590UJ73;A0A590UJW4;E7EQB3;Q9BSV6	0.693822	0.723246	0.466126	1	0.439726	0	0	0	0.207672	0	0	0	0	0
A0A590UJA9;C9JCW7;C9JE12;Q9BVT8	0.027008	0	0.0617734	0	0.226827	0.471354	1	0.904014	0.780848	0.698426	0.557067	0.524102	0.388633	0.4992
A0A590UJB6	0	0	0	0	0	0.536867	0.47525	0.256135	0.636296	1	0	0	0.461578	0.668406
A0A590UJC7;A0A590UK51;O60733;O60733-2	1	0.714933	0.800257	0.480424	0.259296	0.0543345	0.198079	0.214644	0.241527	0.0402298	0.199126	0.097025	0.204008	0
A0A590UJF0;P63092-3	0.241914	0.0782112	0.0130685	0	0.146647	0.18974	0.476541	0.716538	1	0.75423	0.673475	0.589318	0.267132	0.958483
A0A590UJG2;Q9UPN3-2;Q9UPN3-3	0.628794	1	0.735946	0.658988	0.171952	0.260985	0.229378	0.15859	0.50884	0.476569	0.384323	0.218958	0	0.261319
A0A590UJK3;Q14BN4;Q14BN4-2;Q14BN4-3	0	0	0	0.155138	0.320062	0.556759	0.513694	0.563491	0.775343	0.853079	0.77625	0.753207	0.7633	1
A0A590UJK4;A0A590UJP7;A0A590UK01;A0A590UK80;Q13247;Q13247-3	0.0186323	0	0.181032	0.245346	0.426791	0.389051	0.523349	0.516038	0.245318	0.275786	0.300747	0.507054	0.659419	1
A0A590UJL0;P08842	0.0750347	1	0.00608336	0.0966037	0.0704555	0.0267597	0.0369487	0.0441989	0.0234436	0.0160445	0	0.00118823	0.00700892	0.0202368
A0A590UJN0;E7ETK1;E9PBA8;Q52LR7;Q9H2F5;Q9H2F5-2	0	0	0	0	0	0	0	0	0	0	0	0	0	1
A0A590UJS8;A0A5F9ZA98;B4DGL8;O75027;O75027-2	0.024658	0	0.00749447	0.00434375	0.011733	0.021114	0.0599174	0.0682968	0.163221	0.438348	0.798793	1	0.457075	0.548381
A0A590UJW0;A0A590UKC9;P20585	0.6367	0.705834	0.580783	0.449125	0.286556	0.305107	0.535503	0.17991	0.476308	0	0.29526	0	0.460537	1
A0A590UJW8;Q96J02;Q96J02-2	0.242794	0.1466	0.124273	0.13161	0.0344705	0.165375	0.0853647	0.162816	0.367283	0.206857	0.284643	0.317889	0	1
A0A590UJY5	1	0.981476	0.755099	0.539245	0.246723	0	0	0	0	0	0	0	0	0
A0A590UK09;A0A590UK73;B1AKN5;B1AKN7;B1AKN8;Q12857;Q12857-2;Q12857-4	0	0.0136832	0.0205655	0.0333809	0.00927	0.014933	0.026547	0.0262509	0.0353417	0.0571391	0.0635879	0.107658	0.0885093	1
A0A590UK87	0	0	0	0.0998827	1	0.438857	0	0	0	0	0	0	0	0
A0A590UKC3;Q9UF12	0.0796209	0.0293507	0	0.0213664	0.0274865	0.00424483	0.0467513	0.0888473	0.128387	0.13793	0.793373	1	0.594219	0.417165
A0A5E8;Q99501;Q99501-2;Q99501-3;Q99501-4	0	0.279445	0.145124	0.0621123	0.115145	0.068422	0.106092	0.157101	0.288809	0.783179	0.725393	1	0.493644	0.339651
A0A5F9UK94;H0Y360;Q01433;Q01433-2	0.604205	1	0.803661	0.590774	0.302594	0.30653	0.19132	0.201274	0.147748	0.0850926	0.00618437	0	0.00307315	0.030788
A0A5F9UP49;Q9BRK5	0.084003	0	0.0620955	0.158892	0.451648	0.682037	1	0.512362	0.454914	0.252875	0.193564	0.146241	0.186492	0.216163
A0A5F9UY30;A0A5H1ZRP2;O43493;O43493-3;O43493-5;O43493-7	0.180298	0	0.10259	0.163327	0.408073	0.751287	1	0.511761	0.667714	0.552018	0.159307	0.100533	0.142803	0.369849
A0A5F9YFS9;C9JBL1;Q9Y6A9	0	0	0	0	0.331052	0.391754	0.445232	1	0.503802	0.478147	0.886483	0.437628	0.428673	0.261283
A0A5F9YLF9	0.433735	1	0	0	0	0	0	0	0	0	0	0	0	0
A0A5F9ZGN6	0	0	0	0	0	0	0	0	0	1	0	0	0	0
A0A5F9ZGW5;C9J8U3;Q7Z2E3-13;Q7Z2E3-5;Q7Z2E3-7;Q7Z2E3-9	0.12051	0.220393	0	0	0.350315	0.504904	0.467982	0.435721	0.679459	0.741596	0.720974	0.745425	0.974555	1
A0A5F9ZGX0	0	0	0	0	0	0	0	0	0.326641	0.646535	0.483159	0	1	0
A0A5F9ZGX3;A0A5F9ZGY3;A0A5F9ZGY4;A0A5F9ZGZ5;A0A5F9ZH19;A0A5F9ZH30;A0A5F9ZHD2;A0A5F9ZHE4;A0A5F9ZHN5;A0A5F9ZHR8;A0A5F9ZHS1;A0A5F9ZI30;A0A5F9ZI40;A0A5F9ZI65;D6RHE1;I6L894;Q01484	0.198999	0.991087	0.945915	0.275711	1	0.00478124	0.0588194	0.277298	0	0.108231	0.435655	0.849508	0.406111	0.328723
A0A5F9ZGY7	0.97338	1	0.489244	0.470346	0.257196	0.202863	0.0815377	0.147643	0.32138	0.0914866	0	0	0.0673442	0
A0A5F9ZH20;A0A5F9ZH60;A0A5F9ZH84;Q5TF39
A0A5F9ZH43;A0A5F9ZHW6;A4UGR9-4;A4UGR9-5;A4UGR9-6;A4UGR9-7	0	0	0	0	0	0	0.153966	0.0854864	0.277657	0.256553	0.691294	0.284171	0.156044	1
A0A5F9ZH85
A0A5F9ZH93;A0A5F9ZHX9;Q9UHN1	0	0	0	0	0	0	0	0.0688805	0	0.100672	0.625593	1	0.657954	0.916685
A0A5F9ZHE0;C9JQD1;P35557	0.320951	1	0.522488	0.405964	0.294476	0.19644	0.219359	0.138701	0.0873015	0.270616	0.192985	0	0.28561	0
A0A5F9ZHH6;P19793;P19793-2	0.0321279	0.033304	0	0.00411325	0.151119	0.166891	0.183447	0.131716	0.200276	0.1492	0.198453	0.222967	0.334923	1
A0A5F9ZHJ0	0.0280641	0.124707	0.0612454	0.0449131	0.00770008	0.0117945	0	0.0138849	0.0429782	0.188685	0.574413	1	0.715815	0.475456
A0A5F9ZHM4;P07195	0.663493	1	0.62544	0.589634	0.275382	0.23042	0.188893	0.152332	0.125545	0.0736654	0.0207863	0	0.00933916	0.0222148
A0A5F9ZHN2;E7EWD6;Q76L83;Q76L83-2	0	0	0	0	0	0	0.00316739	0	0	0	0	0	0	1
A0A5F9ZHN7;Q9NTJ5	0.144481	0	0.0533738	0.12044	0.352306	0.732905	0.757363	0.94198	1	0.633422	0.600523	0.520283	0.307369	0.526354
A0A5F9ZHN9;P51648;P51648-2	0.105062	0	0.0499081	0.108492	0.264247	0.712626	0.840193	0.946577	1	0.596967	0.838822	0.74704	0.433783	0.460592
A0A5F9ZHP1;Q8N9N2-2	0	0.269192	0.491565	0.289993	0.294102	0.500222	0.30914	0.314773	0.654469	0.552294	0.765439	0.823274	0.13632	1
A0A5F9ZHQ6;A0A6I8PIF8;A0A6I8PIP2;A0A6I8PU78;O75071;S4R3Q1	0	0	0	0	1	0	0	0	0	0	0	0	0	0
A0A5F9ZHX8;A0A5F9ZHZ5;F5GYY5;F5H324;P51690	0.0795054	0	0	0.1122	0.341007	0.652028	0.861906	1	0.73036	0.581127	0.609495	0.851072	0.602407	0.435251
A0A5F9ZI21;Q92974;Q92974-2;Q92974-3;V9GYF0;V9GYM8	0	0.359331	0	0	0	0.855098	0.650011	0.676402	0.489737	0.821209	0	0	0.823518	1
A0A5F9ZI33	0	0	0	0	0	0	0	0.587135	1	0.761554	0	0	0	0
A0A5F9ZI76;Q32ZL2;Q32ZL2-2	0	0	0	0	0.0145988	0.392164	0	0.0833921	0	0.552527	0	0	1	0
A0A5H1ZRP4;Q8WX92;Q8WX92-2	0.477718	0.983569	0.21562	0.545921	0.288782	0.04408	0.00165655	0	0.277609	0.150847	0.203863	0.108508	0.35871	1
A0A5H1ZRR2;G9CGD6;G9CGD6-2;G9CGD6-3;Q6P9H4
A0A5H1ZRS1	0.310412	0.398336	0.359982	0.384838	0	0.24292	0.0109944	0.523551	0.460457	0.754858	0.659599	0.51625	0.536679	1
A0A5K1VW60;Q99766	0.0973668	0.161942	0.0689954	0.0883109	0.0982707	0.0779977	0	0.0299783	0.144723	0.257	0.65727	1	0.430763	0.605839
A0A5K1VW66;P35240;P35240-2;P35240-3;P35240-4;P35240-5;P35240-6;P35240-8	0	0	0	0.180229	0.293472	0.233772	0	0.666635	1	0.639808	0.275236	0.641278	0.17024	0.4725
A0A5K1VW70;P98198;P98198-3	0.552262	0	0.845796	0.989195	0.604805	0	0	1	0.376903	0	0	0	0.638517	0
A0A5K1VW95;P40925;P40925-3	1	0.897803	0.579109	0.520967	0.250579	0.127011	0.137669	0.0705104	0.0516881	0.0598803	0.0192962	0.00689716	0.000552577	0
A0A669KA36;A0A669KB88;B7ZLR4;E7ET55;F5H748;P35670;P35670-2;P35670-4	0.503784	0	0	0.120737	0.303967	0.66039	0.756991	0.914351	0.937347	1	0.434659	0.257375	0.177214	0.852328
A0A669KAV7;A0A669KBH9;M0QXA7;O95785-3	0	0	0	0	0	0	0	0	0	0	0	0	0.88005	1
A0A669KAW1;G3XAD2;Q9BYC5;Q9BYC5-2;Q9BYC5-3	0	0	0	0	0	0	0.746804	1	0	0	0	0	0	0
A0A669KAX3;O76024	0.115909	0	0	0.0958025	0.288474	0.655465	0.944018	1	0.941397	0.58913	0.458501	0.379268	0.404241	0.401617
A0A669KAX4;K4DI93;Q13620;Q13620-1;Q13620-3	0.716988	1	0.92429	0.761305	0.419717	0.308411	0.229385	0.0588473	0.109933	0.0776017	0.0142805	0.0636443	0	0.233145
A0A669KAX9;Q5T653	0	0	0	0	0	0.00376948	0.0301758	0.0422833	0.102902	0.408753	0.802338	1	0.511539	0.484973
A0A669KAY5;A0A669KB27;A0A669KBH7;C9JTE9;Q9UHQ4;Q9UHQ4-2	0.235781	0	0.216065	0.440951	0.489215	0.950401	0.851202	0.874665	1	0.618225	0.465385	0.358417	0.293919	0.310366
A0A669KB10;A0A669KBG8;Q92538;Q92538-2;Q92538-3	0.344397	0.305135	0.258036	0.256647	0.479757	1	0.738715	0.656982	0.397042	0.14614	0.0128204	0	0.0532038	0.225754
A0A669KB12;Q09472	0.219777	1	0.310384	0.416907	0.227298	0.272106	0.314057	0.217789	0.559148	0	0	0.86934	0.537224	0.99079
A0A669KB29;K7EQ21;K7EQZ1;Q9P0U4;Q9P0U4-2
A0A669KB41;A0A669KBH5;D6RA31;E7EPV7;P37840;P37840-2;Q16143	0.385761	1	0	0	0	0	0	0	0	0	0	0	0	0
A0A669KB53;A0A669KB56;A0A669KB68;A0A669KBA4;A0A669KBI6;J3KPM9;P42224;P42224-2	0.558193	1	0.586694	0.599562	0.287332	0.233443	0.110377	0.110531	0.107587	0.0728226	0.034628	0	0.0209562	0.0294861
A0A669KB69;Q6Q788	0.450172	0	0	0.414176	0.61315	1	0.885238	0.68236	0.424494	0.802655	0.316587	0.0661313	0.440471	0.54407
A0A669KB71;O94842;O94842-2;O94842-3	0	0	0	0	1	0	0.287013	0.640646	0.529104	0.81355	0	0	0.667946	0
A0A669KB81	0	0	0	0	0	0	1	0.0465643	0	0	0	0	0	0
A0A669KBE6;A0A669KBF5;Q9NV96;Q9NV96-2;Q9NV96-3	0	0	0	0	0.37598	0.685572	0.398735	0.255445	1	0.931894	0.483004	0.490653	0.408028	0.824739
A0A669KBF4;O00327;O00327-1;O00327-6;O00327-7;O00327-8;O00327-9	0	0	0	0.115752	0	0	0	0	0	0	0	0.227307	0	1
A0A669KBG1	1	0	0	0	0	0	0.76176	0	0	0	0	0	0	0
A0A669KBH1	0	0	0	0	0	0	0	1	0	0	0	0	0	0
A0A669KBH4;Q14999;Q14999-2	0	0	1	0.596312	0.239805	0.427697	0.320044	0.126917	0.292549	0.162045	0	0	0.10909	0.524841
A0A669KBJ1;Q9P202;Q9P202-3;Q9P202-4	0	0	0	0	0	0	0.103594	1	0.42238	0	0	0	0	0
A0A669KBJ4;E7ERL6;Q6P0Q8;Q6P0Q8-2	1	0	0.68005	0	0	0	0	0	0	0	0	0	0	0
A0A669KBJ7;Q9H2P0	0.384098	0.494174	0.349212	0.371805	0.152946	0.204205	0.308312	0.141607	0.232355	0.319097	0	0.287586	0.479509	1
A0A669KBL1;Q93009;Q93009-3	0.524658	1	0.925068	0.839349	0.304344	0.315629	0.187178	0.137715	0.221018	0.0473861	0	0.132789	0.215931	0.415597
A0A6E1WB48;Q14541;Q14541-2
A0A6E1WCP9;H0YGT3;P11474;P11474-2	0	0	0	0	0	0	0	0	0	0	0	0	0	1
A0A6I8PIT3;A0A6I8PIV1;Q9P2J5	0.200552	0.291784	1	0.745257	0.341586	0.359343	0.22523	0.153528	0.186314	0.151607	0.0425788	0	0.0993752	0.0186689
A0A6I8PR89	0	1	0	0	0	0	0	0.965138	0	0	0	0	0	0
A0A6I8PRM6;B1ALU3;O95490-2;O95490-5	0.16707	0.15351	0	0	0.224621	0.117559	0.338476	0.504119	0.486206	0.655189	0.641993	0.595486	0.275299	1
A0A6I8PS32;Q99615	0.606828	1	0.591706	0.453902	0.238334	0.283078	0.233659	0.153988	0.127028	0.0718298	0.039659	0	0.0331626	0.0713978
A0A6I8PTZ8;Q9UL18	0.00956436	0	0.0915431	0.125756	0.217896	0.287037	0.366925	0.621454	0.728377	0.720656	0.948271	1	0.898043	0.70732
A0A6I8PU65;Q9NUD9	0	0	0	0	0	0.6877	0.62138	1	0.603614	0	0	0	0	0
A0A6Q8JGF9;I3L1H5;I3L3X9;Q9BZG8;Q9BZG8-2;Q9BZG8-3	0.686967	1	0.655446	0.565973	0.339179	0.301738	0.228353	0.195795	0.148123	0.193451	0.188274	0.0892649	0	0.206435
A0A6Q8KRG2;Q08379	0.199171	0	0.372276	0.201149	0.320146	0.887659	0.453633	1	0.314345	0.281784	0.277822	0.112257	0	0.269204
A0A6Q8PEX6;A0A6Q8PFB7;A0A6Q8PG86;A0A6Q8PHF4;O95163	0.416032	0.556223	1	0.744439	0.388087	0.333848	0.178239	0.202533	0.249678	0.117162	0.0507116	0	0.0865123	0.084158
A0A6Q8PEY3;A0A6Q8PGV6;I3L3G9;I3L522;Q9NXR1;Q9NXR1-1	0	0	0.736157	0	0	0	1	0	0	0	0	0	0	0
A0A6Q8PEZ4;A0A6Q8PFG4;A0A6Q8PGL3;A0A6Q8PGS2;A0A6Q8PGU0;A0A6Q8PH79;B4DIH2;Q8TB36;Q8TB36-2	0	0	0	0	0	0	0	0	0	0	0	1	0.462175	0.687292
A0A6Q8PEZ7;A0A6Q8PG30;A0A6Q8PHQ1;Q96S66	0.0668978	0	0.0570646	0.0559911	0.215423	0.671428	0.977038	0.898345	1	0.570906	0.447872	0.42948	0.317981	0.289154
A0A6Q8PEZ8;A0A6Q8PGJ3;J3KNA1;Q12840	0	0	0	0	0	0	0	0	0	0	0	0	0	1
A0A6Q8PF03	0.745365	1	0.579038	0.405931	0	0	0.194245	0	0	0	0	0	0	0
A0A6Q8PF05;B4DHE8;J3KTC1;Q96DH6;Q96DH6-2	0	0.0122621	0.707011	0.690162	0.687665	0.565326	0.624183	0.580223	0.652829	0.481809	0.619421	0.522575	1	0.689166
A0A6Q8PF14
A0A6Q8PF33;A0A6Q8PGE8;A0A6Q8PGN5;H3BPK7;P49588	0.587893	1	0.526561	0.360292	0.23502	0.216431	0.179508	0.115345	0.0915963	0.0599693	0.0051701	0.00120241	0	0.00226029
A0A6Q8PF40;A0A6Q8PFC4;A0A6Q8PFY7;A0A6Q8PG00;A0A6Q8PG04;A0A6Q8PGS4;A0A6Q8PH27;A0A6Q8PH89;Q92734;Q92734-2;Q92734-3;Q92734-4	0.782525	1	0.811617	0.75949	0.55812	0.340594	0.487907	0.27757	0.233732	0.156834	0.0566855	0	0.0625682	0.0497352
A0A6Q8PF44;A0A6Q8PH71;A0A6Q8PHA2;A0A6Q8PHG2;Q27J81;Q27J81-2	0.676914	1	0.892609	0.658698	0.464125	0.576261	0.626228	0.453139	0.440264	0.481286	0.385417	0.065276	0.362146	0
A0A6Q8PF62;A0A6Q8PF70;A0A6Q8PF86;A0A6Q8PFJ3;A0A6Q8PG59;A0A6Q8PGB4;A0A6Q8PGP4;A0A6Q8PGY4;A0A6Q8PGY7;A0A6Q8PHA1;A0A6Q8PHC7;A0A6Q8PHH5;A0A6Q8PHK3;A0A6Q8PHP5;Q92562	0.331995	0	0	0.788441	1	0.918244	0.715014	0.597143	0.505068	0.394082	0.397806	0.305033	0.490631	0.408413
A0A6Q8PF83;A0A6Q8PGD1;A0A6Q8PH95;D6REX9;Q8N960;Q8N960-2	0	0	0	0	0	0	0	0	0	0	0	0	0	1
A0A6Q8PF94;O15344	0	0	0	0.561426	0.547611	0.585948	0.492915	0.526324	0.634523	0.779485	0.697619	0.880816	0.492051	1
A0A6Q8PFA4;A0A6Q8PFD4;A0A6Q8PFI6;A0A6Q8PFL5;A0A6Q8PFT9;A0A6Q8PFW1;A0A6Q8PG02;A0A6Q8PG22;A0A6Q8PGB2;A0A6Q8PGF7;A0A6Q8PGH6;A0A6Q8PGT8;A0A6Q8PGW1;A0A6Q8PGY0;A0A6Q8PH15;A0A6Q8PH70;A0A6Q8PH85;Q6UWE0;Q6UWE0-2	0.755732	1	0.692492	0.53734	0.318742	0.331164	0.218816	0.251664	0.18201	0	0	0	0.0963752	0.0799244
A0A6Q8PFA6;A0A6Q8PG37;A0A6Q8PGH7;A0A6Q8PH57;O00139;O00139-1;O00139-2;O00139-4;O00139-5	0	0.0669991	0.0893739	0.0897523	0.140752	0.162473	0.268114	0.275763	0.25555	0.319623	0.313199	0.362895	0.381061	1
A0A6Q8PFE6;Q9UKA9;Q9UKA9-2;Q9UKA9-3;Q9UKA9-4	0	0	0	0.0187404	0.30717	0.246528	0.421992	0.301261	0.439741	0.259111	0.412905	0.538927	0.811475	1
A0A6Q8PFG0;A0A6Q8PGT4;A0A6Q8PH04;A0A6Q8PHN3;A0A6Q8PHP9;Q9P212;Q9P212-2
A0A6Q8PFI8;P11166	0	0	0.249406	0.347645	0.643362	0.821217	0.452424	0.468114	0.489235	0.481297	0.490092	0.450401	0.150843	1
A0A6Q8PFJ0;P02545	0.0214502	0.00472415	0.00127033	0	0.0037122	0.00418085	0.00656651	0.0203223	0.0214531	0.0461118	0.0752339	0.13568	0.0758443	1
A0A6Q8PFJ4;A0A6Q8PGV8;O95140	0	0	0.000198949	0.0725463	0.114079	0.180065	0.159781	0.219672	0.293924	0.367705	0.725976	1	0.454474	0.608554
A0A6Q8PFK4;P50747	0.675612	1	0.675763	0.572733	0.29544	0.199836	0.112196	0.19418	0.201204	0.0865369	0.370497	0.40344	0.0997611	0
A0A6Q8PFM5;O95831;O95831-3	0.0323729	0.0262393	0.0074304	0.00118733	0	0.0326231	0.0497629	0.117375	0.205452	0.278321	0.724475	1	0.476608	0.533248
A0A6Q8PFU3;P43034	0.661205	1	0.857913	0.774162	0.480641	0.267332	0.226691	0.171095	0.192189	0.182688	0.0455661	0.0186497	0.0257285	0
A0A6Q8PG52;A0A6Q8PH84;P51149	0.493108	0.153451	0	0.107568	0.226303	0.874779	0.95406	0.749144	1	0.688451	0.819103	0.762029	0.307233	0.367275
A0A6Q8PG54;G3XAG5;P51793;P51793-2	0	0	0	0	0.506223	0	0	1	0.753828	0	0	0	0	0
A0A6Q8PG85;Q9HD42	0.61403	1	0.379819	0.373092	0.396365	0.386334	0.443583	0.456327	0.192265	0.16322	0.0937681	0	0.00689762	0.191275
A0A6Q8PGA8;A0A6Q8PGI6;A0A6Q8PGZ8;A0A6Q8PHH9;P41250	0.601561	1	0.778727	0.481118	0.1809	0.149638	0.0449823	0	0.041926	0.0239924	0.0726257	0.0903743	0.0593919	0.00214947
A0A6Q8PGB0;P24928	0.0188105	0.177213	0.107617	0.0897688	0.0173071	0.0554849	0.0765666	0.0853937	0	0.101752	0.073289	0.106199	0.0343795	1
A0A6Q8PGM6;Q9UJY1	0	0	0	0	0.24763	1	0	0.606469	0	0	0	0.848635	0.206508	0
A0A6Q8PGS5;A0A6Q8PHS7;C9JEX3;Q13614;Q13614-2	0	0.439414	0.281908	0.282297	0.0412851	0.0900091	0.0757395	0.137168	0.786442	0.474901	0.207994	0.180589	0.022166	1
A0A6Q8PGU6;Q8NB90	0.403269	0.357389	0.251489	0.714506	0.539802	0.694998	0.2319	0.0803943	0	0.0181081	1	0.457315	0.069722	0.162493
A0A6Q8PH13;A0A6Q8PH87;Q86WG5;Q86WG5-3	0	0	0	0	0	0	0	0.912113	0.817343	0.308771	0	0	0.220078	1
A0A6Q8PHA5;E7ETE2;P12081;P12081-4	0.807773	1	0.904531	0.609475	0.27725	0.365587	0.239121	0.258584	0.213374	0.0910672	0.0529449	0.0327647	0.0188894	0
A0A6Q8PHC6;P50440	0.0974835	0.155063	0.139356	0.122393	0.0259976	0.0133648	0.0134025	0	0.018301	0.0914466	0.660029	1	0.601541	0.510688
A0A6Q8PHH2;O95251;O95251-2;O95251-4
A0A6Q8PHK0;Q14669-2	0.222999	0.449708	0.297171	0.344816	0.160075	0.120779	0.150354	0.122866	0.07515	0	0.0113066	0.0794193	0.219203	1
A0A6Q8PHM5	0	0	0	0	0	0	0	0	0	0	0.58299	0	1	0
A0A6Q8PHP0;P49902;P49902-2	0.605604	1	0.642612	0.713692	0.396146	0.394066	0.252272	0.216006	0.161747	0.138828	0.0641906	0	0.078179	0
A0AV96-2	0.0561678	0	0.730019	0.726482	0.742384	0.669393	0.381696	0.315462	0.646974	0.274297	0.417314	0.616764	0.855919	1
A0AVL1;F8WC54;Q13443;Q13443-2	0	0	0	0	0	0	0.248549	0	1	0	0	0	0.548568	0.465493
A0AVT1	0.771382	1	0.76461	0.548839	0.268192	0.23057	0.166041	0.125433	0.0840549	0.0540476	0.00505743	0	0.0158081	0.00312993
A0MZ66	0.62556	1	0.495742	0.457818	0.320652	0.239274	0.205423	0.12446	0.109814	0.0920326	0.0171662	0.00116507	0.0281505	0
A0PJW6	0	0	0	0	0	0	0	0.152515	0	0.245278	0.836639	1	0.439536	0.51107
A0PJX8	0.0647688	0	0.107916	0.115221	0.416173	1	0.906735	0.708345	0.883892	0.479412	0.413026	0.0675838	0.262609	0.216149
A0PJZ3;C9JND4	0	0	0	0	0	0	1	0	0	0	0	0	0	0
A0RZB6	1	0.71526	0	0	0	0.26807	0	0.26357	0	0	0	0	0	0
A1A4S6;H0Y8W5	0	0	0	0	0	0	0	0	0.40708	0	0	0	0	1
A1A519;A1A519-2;A1A519-3;D6RIE9
A1A5C7;A1A5C7-2;A1A5C7-3;C9J4Z0
A1IGU5	0.151332	1	0.213439	0.614905	0.349793	0.516097	0.422997	0.63704	0.607642	0.629922	0	0	0.257688	0.423383
A1KZ92;A1KZ92-2;A1KZ92-3;H0YAV0;K4DIA6	0	0	0	0	0.112113	0.0138906	0	0	0	0	0	0	0.699576	1
A1L0T0	0.124908	0	0.0546786	0.126927	0.334114	0.666543	0.891197	0.954449	1	0.540617	0.51027	0.456119	0.292985	0.351414
A1L188
A1L390;A1L390-3	0.780952	0	1	0.22892	0.191571	0.240349	0.295752	0.338465	0.239773	0.13296	0.259694	0	0.40696	0.273344
A1X283	0.808409	1	0.414599	0.25617	0.240052	0.0749312	0.213757	0.10793	0.27861	0.0821427	0	0	0.030987	0
A2A274;Q99798	0.0745475	0.109194	0.0767081	0.0447239	0.0125922	0.00184228	0.00538938	0	0.0206425	0.270707	0.76524	1	0.656309	0.445319
A2A2L4;Q5JX74;Q9NUS5	0	0	0	0	0.635774	0.514385	0.687361	0.578525	0.974435	1	0	0	0	0
A2A2N0;O60676	0	0	0	0	0	0	0	0	0	0	0	1	0.351632	0.363452
A2A2Q9;Q9Y312	0.840205	1	0.855327	0.682415	0.292548	0.360962	0.260257	0.261971	0	0.227349	0	0.0712772	0.0776792	0.235352
A2A2V1;P04156	0	0	0	0	0	0	0	1	0	0	0	0	0	0
A2A2V2;P42696;P42696-2;Q5TCT4	0	0	0	0	0	0	0	0	0	0	0	0	0	1
A2A369;Q8NF50;Q8NF50-2;Q8NF50-3;Q8NF50-4	0.170735	0	0.171735	0.159299	0.21362	0.304301	0.283993	0.599706	0.637999	0.721394	1	0.921656	0.551125	0.868307
A2A3G7	0	0	0	0.107616	0.420927	1	0	0.58302	0.236726	0	0	0	0	0
A2AJT9;A2AJT9-2;A2AJT9-3;F2Z385;H7BXX2
A2IDC6;Q13084	0	0	0	0	0.018431	0	0.0286482	0.0640417	0.217561	0.142131	0.80362	1	0.538878	0.53963
A2RRP1	0.216506	0	0.0376197	0.0473639	0.244774	0.606079	0.910722	0.912403	1	0.609035	0.580989	0.625052	0.341413	0.540374
A2RTX5;B7ZLP8	0.604545	0.755045	1	0.802753	0.68269	0.759635	0.581573	0.237609	0.451176	0.344254	0	0	0.278957	0
A2RU37	0.0807329	0	0.0632529	0.0592693	0.054545	1	0.25043	0.594984	0.367256	0.112249	0.157641	0.271691	0.0337963	0.471527
A2RU49	0.763122	1	0.401625	0.382459	0.155955	0.369142	0	0.138687	0	0	0	0	0	0
A2RUC4	0.25696	1	0.669652	0.559241	0.477238	0.208591	0.13848	0.14488	0	0	0	0	0	0
A2RUS2;A2RUS2-2;A2RUS2-4;E5RHH2;E5RI43;E5RIR7;E5RJ42;E9PF32;H0YAY3
A2VDF0	0.550455	1	0.456407	0.268504	0.420022	0.203978	0.19073	0.063238	0.0370299	0.0190419	0	0	0	0
A2VDJ0;A2VDJ0-3;A2VDJ0-5	0.650497	1	0.177636	0	0	0.0751371	0	0	0	0	0	0	0	0
A3KFL2;Q13868;Q13868-2;Q13868-3	0	0	0	0.44331	0.784687	0.611392	0.374967	0	0	0	0	0	0	1
A3KMH1;A3KMH1-3	0.0405998	0.0449489	0.0393648	0.0171919	0.00533949	0.0142354	0	0.00715529	0.0603771	0.269982	0.749934	1	0.596947	0.394592
A3KN83;A3KN83-2;A3KN83-3	0.770018	1	0.605965	0.578669	0.570861	0.371159	0.344722	0.358234	0.300457	0.0977571	0	0	0	0.500516
A4D1E9	0	0	0	0.0180721	0.0203572	0.0867504	0	0	0.0610378	0.255075	0.376856	1	0.51794	0.34651
A4D1P6	0.682927	0.845102	1	0.67066	0.602479	0.498339	0.447577	0.528356	0.534414	0.870728	0.312849	0	0.362222	0.308056
A4D1U4;C9J7X6	0	0	0	0.363914	0.206661	0.330255	0.26458	0.349962	0.459041	0.261636	0.777995	1	0.231717	0.619074
A4D2B0	0.523943	1	0.411908	0.63302	0.643851	0.193358	0	0.228036	0	0	0	0	0	0
A4FU69-5;A4FU69-6	0	0	0	0	0	1	0	0.367264	0.390935	0	0	0	0	0
A5D8V6;F5H4Q5	0.806231	1	0.507659	0.477047	0.442805	0.251062	0	0	0	0	0	0	0	0
A5D8V7;A5D8V7-2;K7EN59;K7EPK8	0	0	0	0	0	0	0	0.0708209	0	0.424931	1	0.859727	0.417599	0.624218
A5PLN9;A5PLN9-2;A5PLN9-4;A5PLN9-5	1	0.458356	0.589246	0.418554	0.629188	0.720194	0.616862	0.48191	0.380175	0.285054	0.0533443	0	0.201242	0.117139
A5YKK6;A5YKK6-2	0.17279	0.16115	0.775651	1	0.401665	0.246759	0.113093	0.294191	0.663984	0.137189	0.193846	0.38741	0.849368	0
A6H8Y7;Q6ZRK6;Q6ZRK6-2	0	0	0	0	0	0.387461	0	0	1	0	0	0	0	0
A6NC57;A6NC57-2	0.72852	0	1	0	0	0	0	0	0	0	0	0	0	0
A6NC78	0	0	0	0	0.0700651	0.23377	0.274394	1	0	0	0	0	0	0
A6NCC9;C9JHT9;C9JJV1;E9PME3;Q9Y5U2;Q9Y5U2-2	0.971251	1	0.460264	0.302163	0.0969207	0.233561	0.132467	0.0755428	0.00647102	0.035931	0	0	0	0.0368151
A6NCE7;H3BTL1;Q9GZQ8	0	0	0	0	0.537145	0	0	1	0	0	0	0	0	0
A6NCS6	0.160006	0	0.0230466	0.0301922	0.0729201	0.115592	0.274801	0.642912	0.940122	0.632667	0.979947	0.569886	0.273385	1
A6ND36	0.512504	1	0.836205	0.582163	0.533308	0.556049	0.415691	0.5068	0.373381	0.128696	0	0	0.114309	0
A6ND91	0.833622	1	0.593854	0.505643	0.250798	0.145975	0.124601	0.0697637	0.0761704	0.0904246	0.0300251	0.0149923	0.0192271	0
A6NDG6	0.763431	1	0.690104	0.537022	0.337132	0.204003	0.154171	0.0884073	0.0819959	0.0526832	0.00254916	0.017708	0.00290964	0
A6NDL8	0.796528	0.500036	1	0	0	0	0	0	0	0	0	0	0	0
A6NDR6	0	0	0	1	0.25775	0.369375	0.702719	0.0660113	0.539094	0	0	0	0	0.704794
A6NDU8	0.624751	1	0.412087	0.492491	0.284341	0	0	0	0	0	0	0	0	0
A6NE01;F5GYN0;F5H8C1
A6NED2;G3V2I3	0.536089	1	0.228124	0.358048	0.110551	0.141886	0.10403	0	0	0	0	0	0	0
A6NEE1	0	0.761892	1	0.946754	0	0.453254	0.381912	0	0.400265	0	0	0	0	0
A6NEL0;A6NL93;P05114	0.033048	0.00866368	0	0.0118314	0	0	0	0	0.00535521	0.027166	0.0642472	0.100199	0.251774	1
A6NEL2	0	0	0	0	0	0	0	0	0.339771	0	0	0	0	1
A6NEM2;P51610;P51610-2;P51610-4	0.333995	0.61826	0.187662	0.165378	0.0751735	0.0772516	0.0671076	0.093605	0.0253396	0	0.0434611	0.0969688	0.330145	1
A6NEY8	0.571501	1	0.646895	0.456795	0.350624	0.23183	0.238561	0.133723	0.137698	0.0726043	0.0158672	0	0.0212345	0.00260074
A6NF36	0	0	0	0	0	0	0	0	0.0253307	0.0331846	1	0.942991	0.30528	0.292969
A6NFQ9;F8W8I8	0	0	0	0	0	0	0	0	0	0.0973258	1	0	0	0
A6NFS0;Q9NSD4;Q9NSD4-2	0	0	0	0	0	0	0	1	0	0	0	0	0	0
A6NFV8;D6RCT8
A6NFX8;Q9UKK9	0.817674	1	0.770754	0.596625	0.344447	0.249915	0.229617	0.115691	0.090288	0.0443205	0.00607168	0	0.00447767	0.00345084
A6NFY7	0.0458077	0.0657105	0	0.035231	0.02146	0.00931176	0.0166757	0	0	0.0807535	0.605099	1	0.593253	0.613702
A6NG10;K7EIJ0;K7EMC9;K7ENL2;Q969T9	1	0.779685	0.594406	0.567419	0.123069	0.138502	0.0933215	0.139734	0	0.0744989	0.0903458	0.0905298	0.0914669	0.272657
A6NGA6;Q5H9D4;Q9Y5S8;Q9Y5S8-2;Q9Y5S8-3	0	0	0	0	0	1	0	0	0	0	0.269542	0	0.65752	0
A6NGJ0;P51808
A6NGL4;P0CW00
A6NGQ3;Q5VST9;Q5VST9-2;Q5VST9-6	0.118292	0.396446	0	0.0338332	0.108266	0.151528	0.140132	0.305867	0.597928	0.520487	1	0.726182	0.561674	0.40999
A6NGU5;B5MCK8;P19440	0.109185	0	0.0242912	0.069027	0.152813	0.208043	0.356166	0.742259	0.578544	0.617362	0.49357	0.41083	0.238068	1
A6NGW1;O95070	0	0	0	0.174533	0.582848	1	0.709353	0.840649	0.696054	0.315884	0.270599	0	0.371404	0
A6NGY7;Q9H694-2	0	0	0	0	0	0	0.278673	0	0.123785	0.0984032	0	0	0	1
A6NH11	0.131725	0	0.0590691	0.197213	0.338112	1	0.929961	0.897599	0.564715	0.293648	0.196958	0.382572	0.099226	0.256113
A6NHG8;Q13114	0	0	0	0.726786	0	0.691529	0.995582	0.61799	0.813224	0.627125	0.908305	0.396953	0.427443	1
A6NHJ8;A6NND8;C9JAL0;C9K0F7;H7C3I5;O95825;O95825-2	0.188545	0.293091	0.196914	0	0	0	0	0.109984	0.170853	0	0	1	0	0
A6NHR9;A6NHR9-2	0	0	0	0	0.733414	0	0	0	0.0453371	0	0	0.126061	0.141852	1
A6NI28;E9PJK4	0	0.31964	0.0488457	0.206928	0.223466	0.183984	0.14646	0.361353	0.344198	0.462365	0.403741	0	0.415613	1
A6NI72;A8MVU1;C9J155;P14598;P14598-2	0.431788	1	0.901198	0.348902	0.476488	0.396478	0.593356	0.488141	0.680886	0.330478	0	0.322837	0	0.236071
A6NIH7	1	0.99849	0.645653	0.447072	0.365081	0.212004	0.31253	0.158313	0.138092	0	0	0	0.04169	0.0642108
A6NIT2;A6NMN0;P46020;P46020-2;P46020-3	0.422767	0.974571	1	0.789381	0.406389	0.322394	0.179012	0	0.162904	0.105313	0	0	0	0
A6NIV6	1	0	0.0619018	0.199519	0.164137	0	0	0	0	0	0	0	0	0
A6NIZ0;Q9GZM8;Q9GZM8-2;Q9GZM8-3	0.778465	0.932099	1	0.499588	0.69432	0.619584	0.640846	0.474498	0.422697	0.782838	0	0.38125	0.310226	0.850458
A6NJA2;P54578;P54578-2;P54578-3	0.494392	0.64292	1	0.846623	0.557664	0.399592	0.284474	0.193339	0.148093	0.0819729	0.0301897	0.023007	0.0713089	0
A6NJZ7;A6NNM3;J3KP16;Q9UFD9
A6NK44;H7C348
A6NKB5-2	0	0	0	0	0	0	1	0	0	0	0	0	0	0
A6NKD9	0.221829	0	0	0	0	0	0.185466	0.173198	0.23624	0.286291	0.483247	0.225724	0.424769	1
A6NKN8	0.846863	1	0.968006	0.755896	0.350047	0.277731	0.38826	0.122742	0	0	0	0	0	0
A6NKZ2;P51606	0.809358	1	0.628036	0.4884	0.165522	0	0	0.125323	0	0	0	0	0	0
A6NLH6;Q9P003	0.184932	0	0.0833907	0.194929	0.608669	0.839678	1	0.893114	0.747106	0.431095	0.713423	0.96313	0.572027	0.362915
A6NLN1;P26599;P26599-2;P26599-3	0.000733263	0	0.0685691	0.117989	0.159016	0.242544	0.250007	0.301856	0.39446	0.364882	0.410079	0.646951	0.602837	1
A6NLP5	0.547935	1	0.641639	0.638317	0.426267	0.291106	0.360187	0.174246	0.111066	0.24791	0.087781	0.0267876	0.0426261	0
A6NMH6;Q92599;Q92599-2;Q92599-4	0.0128792	0.219774	0.110511	0.0457595	0	0.0468619	0.127569	0.049056	0.250898	0.146779	0.187994	0.218145	1	0.301361
A6NML8;C9J6U3;O60879-2	0.822691	1	0.817495	0.945617	0.671446	0.576468	0.332015	0.303239	0.287561	0.25484	0.0525414	0	0.112788	0.134336
A6NMQ3;O43768;O43768-2;O43768-3;O43768-4;O43768-9;Q5T5H1	0.794192	1	0.521998	0.619155	0.436067	0.248905	0.292529	0.110752	0.0251781	0.0496506	0	0	0	0
A6NMV7	1	0	0	0	0.645584	0	0.0172675	0.25114	0.144578	0	0	0	0	0
A6NMZ5	0	0	0.399288	0	0	0.747018	0	0.00407007	1	0.306104	0	0.701617	0	0
A6NMZ7;A6NMZ7-2	0	0	0	0	0	0	0	0	0	0	0	0	0	1
A6NN50;O75147;O75147-1;O75147-2;O75147-4	0	0	0	0	1	0	0	0.33534	0	0	0	0	0	0
A6NNK5;Q12888;Q12888-2;Q12888-3	0	0	0	0	0	0	0	0	0	0	0	0	1	0.891932
A6NP16;E7ERM3;Q4VCS5;Q4VCS5-2	0	0	0	0	0	0	0.249499	0	0.826939	0	0	0	0.604619	1
A6NP52;O60831	0.0291909	0	0	0.0708872	0.341558	0.712478	1	0.832062	0.625714	0.788705	0.524133	0.59852	0.410341	0.576888
A6PVD3;P48436;P56693;P56693-2;P57073
A6PVK5
A6PVU8;Q6UWW7;Q9NNX1;Q9NNX1-2;Q9NNX1-3
A6PVY1;A6PVY2;A6PVY3;A6PVY3-2	1	0.521088	0	0.751838	0	0.299712	0	0	0.0950806	0	0	0	0	0
A6PW57;Q99755;Q99755-3;Q99755-4	0	0	0	0	0	0	0	0.745552	1	0.322872	0	0	0	0
A6PWM2;Q6UXH1;Q6UXH1-2;Q6UXH1-3;Q6UXH1-4;Q6UXH1-5;Q6UXH1-6	0	0	0	0	0.106547	0.310461	0.731834	1	0.439559	0.208131	0.361338	0.272316	0.562948	0.0490985
A6XND0;A6XND1;B3KWK7;C9JMX4;H0Y5K2;P17936;P17936-2	0	0	0	0	0.0561506	0.324212	0.790837	0	0.257862	1	0.0118272	0.0232288	0.0715626	0.618997
A7E2V4;A7E2V4-3;A7E2V4-4;A7E2V4-5;S4R393;S4R410	0	0	0.527598	0.976148	0.443006	1	0.42949	0.37281	0	0	0	0	0	0
A7KAX9;A7KAX9-2	0.774715	0.822727	0.860139	0.674865	1	0.290112	0.31962	0.338436	0.196831	0	0	0	0	0
A7MCY6
A7XZE4;Q3SX28	0	0	0	0	0	0	0	0	0.587265	0	0	0	1	0.832129
A8CG34;A8CG34-2	0	0	0	0	0	0	0	0	0	0	0	0	0	1
A8DPD7;Q9C0D3
A8MPP7;A8MPY5;E7ETV6;Q9UPE1;Q9UPE1-2;Q9UPE1-3;Q9UPE1-4	0.528455	0	0	0	1	0	0	0	0	0	0	0	0	0
A8MQ02
A8MQB8;G3V0J0;Q06787-2	0	0	0	0	0	0	0.544571	1	0.844342	0.867744	0	0.153942	0.80942	0
A8MSI8;D6RAR2;D6RFL2;J3KTA2	0	0	0	0	0	0	0	0	0	0	0	0	1	0
A8MSY1;C9JYJ2;Q8IVN3	0.674829	1	0	0.200666	0	0	0	0	0	0	0	0	0	0
A8MT69;A8MT69-2;A8MT69-3;J3QR01;J3QRS1
A8MTT3	0	0	0	0	0	0	0	0.246453	0	0	0.961823	1	0	0.396055
A8MUM1;Q53HC9	0.403357	0.242317	0.258143	0.228199	0.17559	0.253297	0.105267	0.115317	0.137219	0.1098	1	0	0.116195	0.586235
A8MVV6;E9PN41;E9PPX8;E9PSH3;J3KQ42;O14817
A8MVZ6;Q96G01;Q96G01-3;Q96G01-4	0	0	0	0	0	0	0	1	0	0	0	0	0	0
A8MWD9;F5H013;P62308;Q49AN9	0	0.0680676	0.0812357	0.018546	0.167565	0.0569877	0.162194	0.0799374	0.0516913	0.0332951	0.0351254	0.197465	1	0.842079
A8MXB7	0.58814	1	0.913517	0.616867	0.551299	0.31967	0.360917	0.31949	0.345299	0.182031	0.0129507	0	0.147286	0.223421
A8MXV4	0.142349	0.185334	0.0985775	0.0826067	0	0.0187938	0.109335	0.0441983	0.0539839	0.265571	0.806198	1	0.665377	0.377221
A8MYA3;J3KQ25;Q8N6M9	0.627718	0.27696	0.332148	0	0.874815	0	0	0	0	0	0	0	1	0
A8MYZ0	0	0	0	0	0	0	0	0.167269	0.0992603	0.0620005	1	0	0	0
A8TX70;A8TX70-2;E9PAL5	0	0	0	0	0	0	0	0	0	0	0	0	0	1
A9J4F5;O00488	0	0	0	0	0	0	0	0	0	0	1	0	0	0
A9X3U0;Q96GF1	0.130026	0.10114	0.187453	0	0.0985021	0.19897	0.405513	0.596301	0.160929	0.295094	0.680814	1	0.360775	0.598542
A9Z1X7;E9PCT1;Q8IYB3;Q8IYB3-2	0	0.0580578	0.188955	0.202594	0.0940859	0.0772399	0.0602103	0.0555843	0.126457	0.11147	0.0764783	0.20535	0.441972	1
B0QY89;Q9Y262	0	0.00628997	1	0.869674	0.639397	0.621512	0.449438	0.439918	0.466995	0.341932	0.295652	0.302965	0.275103	0.302537
B0QY95;Q9NQG6	0	0	0	0	0	0	0	0	0	0	1	0	0	0
B0QYF8;P02144	1	0	0	0	0	0	0	0	0	0	0	0	0	0
B0QYK0;Q01844;Q01844-3;Q01844-5;Q01844-6	0.684491	1	0.692276	0.92917	0.993988	0.536447	0.584689	0.588748	0.292778	0.211348	0.0240929	0	0.304857	0.266073
B0QYN7;H3BQQ9;P63279	1	0.588304	0.468517	0.636773	0.203232	0.17141	0.281255	0.177503	0.206237	0.0974039	0.0450136	0.0548523	0	0.214685
B0QYP2;O95931	0	0	0	0	0	0.495887	0.703911	0	0	0	0	0	0.480885	1
B0QYW5;F6RTR7;O43808	0.250635	0	0	0	0	0	0	0.128283	0.255879	0.431019	0.935676	1	0.276507	0.276892
B0QZ18;F2Z2V0;Q99829	0.754234	1	0.534642	0.365737	0.250879	0.198182	0.146471	0.110556	0.0844289	0.0412127	0.0238156	0	0.00979689	0.0216991
B0QZA9;Q6QHF9;Q6QHF9-4
B0YIW2;P02656	0.439004	0	0.0843959	0.301801	0.793127	0.306204	0.970712	1	0.213607	0.436541	0.492812	0.251603	0.431377	0.490315
B1AH87;P30536	0.128272	0	0.129794	0.106298	0.187207	0.14991	0.187142	0.250369	0.259902	0.336227	0.759594	1	0.388928	0.67395
B1AHA8;P09601	0.450201	0	0.209593	0.36256	0.385065	0.566664	1	0.775065	0.655735	0.747982	0.661605	0.546718	0.59678	0.517427
B1AHB1	0.273186	0	1	0.195651	0.931309	0.173385	0.134579	0.172137	0.0336425	0	0	0	0.0194403	0.0373394
B1AHL2;P23142;P23142-2;P23142-3;P23142-4	1	0.605714	0.741266	0.822398	0.34036	0.313427	0.215594	0.174926	0.159323	0.162606	0.342741	0	0	0.22553
B1AHR2	1	0.767405	0.229101	0.162546	0.21665	0.0912636	0.134816	0.067203	0.0208927	0	0	0	0	0
B1AJQ6;Q86Y82	0	0	0	0.36953	0.640064	0.994703	1	0.755119	0.580764	0.736903	0.281955	0.421908	0.145338	0.679312
B1AJS1;O14525;O14525-2;O14525-3	0	0	0	0	0	0	0	0	0.693188	0	0	1	0	0
B1AK53	0	0	0	0	0	0	0	0	0	0.714584	0.56425	0	0.363479	1
B1AK61;Q5VTY9;Q5VTY9-2;Q5VTY9-3;Q5VTY9-5;Q5VTY9-6;Q5VTY9-7	0	0	0	0	1	0	0	0	0	0	0	0	0	0
B1AK88;P47756-2	0.484705	1	0.849755	0.48328	0.31323	0.0831702	0.0704637	0.154722	0.112141	0.0439758	0.328638	0.0652103	0	0.180083
B1AKC9;P29323;P29323-2;P29323-3	0	0	0	0.867561	1	0.712799	0	0.472357	0	0	0	0	0	0
B1AKG0;Q03591
B1AKI6;Q9NUK0;Q9NUK0-2	0.75403	0.547646	0.266456	0.764808	1	0.554644	0.596271	0.113167	0.242473	0.0799458	0	0	0	0
B1AKL4;Q9NRA8;Q9NRA8-2;Q9NRA8-3	0	0	0	0	0.508808	0	1	0.263203	0.28863	0	0	0	0	0
B1AKR6;Q9NP97	0.255238	0.323084	0.735471	1	0.771887	0.467304	0.522265	0.356353	0.256288	0.181569	0.213181	0.114086	0.262505	0
B1AL05;H0Y6Y8;Q8N983;Q8N983-2;Q8N983-3;Q8N983-4;Q8N983-6;Q8N983-7	0	0	0.0248001	0.0362642	0.0334919	0.0325867	0.034615	0.0759546	0.0857841	0.472511	0.83826	1	0.616747	0.56312
B1AL69;Q7L3B6	0.659119	1	0.862911	0.582537	0.471152	0.325352	0.288905	0.157519	0.12167	0.167888	0	0	0.0745027	0.0882939
B1ALA9;P60891	0.291119	0.298179	1	0.857309	0.404348	0.266169	0.134635	0.120844	0.0498937	0.154343	0.0543207	0.0247265	0.0367733	0
B1ALD1;Q9Y6B7
B1ALM5;Q9P0T7	0	0	0	0	0.598926	0.923128	0.889993	1	0.741114	0.277503	0.327601	0	0.270804	0.508757
B1ALY0;Q8IXS6-2	1	0.986443	0.642173	0.552378	0.424007	0.252281	0.183423	0.199905	0.259459	0.198294	0.0279623	0	0.0144051	0.125332
B1AM21
B1AM27;O14795;O14795-2	0.916314	0.863876	1	0.74237	0.550409	0.688866	0.353228	0.485112	0.502325	0.508016	0.130462	0.693388	0	0.952392
B1AM31;Q5T1B0
B1AMI2	0	0	0	0	0	0	0	0	0	0	0.329296	0	1	0
B1AMN7;Q9P2B4	0.249356	0	0.209488	0	0.256711	0.199894	0	0.163683	0.490724	0.868299	0.993132	0.499372	1	0.266861
B1AMS2;Q14141;Q14141-2;Q14141-4	0.376624	0.233499	0.075033	0	0.0141601	0.10232	0.177908	0.0824384	0.403044	0.146242	0.220613	0.370261	1	0.525217
B1AMT9;B1AMU0;B1AMU5;Q969W1;Q969W1-2;Q969W1-3;Q969W1-4
B1AMW1;H0YDI1;P19256;P19256-2;P19256-3	0	0	0	0	0	0	0	0.220321	0	0.919159	0	0	0	1
B1ANE6	0.349511	0	1	0.569192	0.0641027	0	0	0	0	0	0	0	0	0
B1ANH0;B1ANH2;Q16774;Q16774-2	1	0.958638	0.444664	0.351646	0.265	0.293149	0.198422	0.12279	0	0.121093	0.306933	0.737173	0.513172	0.207442
B1APN9;O75335	0	1	0.399135	0.624136	0.234825	0	0	0	0	0	0	0	0	0.289608
B1APR7;Q99504;Q99504-2;Q99504-3;Q99504-4;Q99504-5	0	0.829843	1	0.862008	0.564841	0.514328	0	0	0	0	0	0	0	0
B1AQK6;B1AQK7;E9PDR3;F6RH32;Q00975;Q00975-2
B1AVT0;P49760;P49760-3	0	0	0	0	0	0	0	0	0	0	0	0	1	0.562052
B1AXG1;B4DG22;B7ZB17;P51812	0.805769	1	0.617505	0.540008	0.267559	0.236152	0.172216	0.146265	0.155255	0.117878	0.0550491	0	0.012733	0.0705479
B2RC85;B2RC85-2;H0YFY2;P0C881
B2WTI3;B2WTI4;K7EJU9;Q6NYC1;Q6NYC1-2;Q6NYC1-3	0.145846	1	0	0	0.0837323	0	0	0	0	0	0	0	0	0
B3EWG3;B3EWG5;B3EWG6	1	0.708303	0.403161	0.454306	0.398256	0.127603	0.249453	0.14149	0	0	0	0	0	0
B3KP42	0.0140308	0	0	0	0.00876618	0.0378436	0.036107	0.0801065	0.193459	0.160051	0.397339	1	0.45748	0.796337
B3KP96;H0Y626;J3QKY5;K7EL43;K7ENN8;O95361;O95361-2	0	0	0	0	1	0	0	0	0	0	0	0	0	0
B3KS81	0	0	0	0	0	1	0	0	0	0	0	0	0	0
B3KT41;Q496J9	0	0	0	0	0	0	0	1	0	0	0	0	0	0
B3KTM8;H0YLJ3;Q9UBU8-2	0.339722	0	0.14421	0.197503	0	0.0351367	0.0147266	0.0191264	0	0.0400083	0.133922	0	0.351769	1
B3KUS5;Q70CQ3	0	0	0	0	0	0	0	0	0	0	1	0	0	0
B3KVY5;F5GWA4;F5GWK6;F5H268;Q9H3F6;Q9H3F6-2;Q9H3F6-3	0.0618808	0	0	0.341989	0.0956038	0	0	0.0235672	0.095631	0.109237	0.629481	0	0	1
B3KY94;O14735;O14735-3	0.115848	0	0.0986228	0.142811	0.39055	0.666576	1	0.723715	0.816848	0.75175	0.91475	0.829235	0.704201	0.686647
B4DDD6	0.670535	1	0.485456	0.36053	0.35261	0.172653	0.0649099	0.210716	0.217502	0.0839487	0.0409589	0.0504611	0.0783235	0
B4DDF4;B4DUT8;Q99439	0.604707	1	0.621099	0.915959	0.527328	0.44775	0.26655	0.283979	0.340874	0.278712	0.070583	0	0.125733	0.202594
B4DDX3;H7C1L4;Q8TCB7	0	1	0	0.392724	0	0	0	0	0	0	0	0	0	0
B4DEE8;P16455	0	0	1	0	0	0	0.640002	0	0	0.56618	0	0	0	0.861143
B4DEN4;B8ZZ56;E7EV05;E9PFU9;Q8WV99;Q8WV99-2
B4DFC0;E9PMV6;E9PR50;G3V1B4;H0YD20;H0YE53;H0YEL8;Q9UGK8;Q9UGK8-2	1	0	0	0.523246	0	0	0	0	0	0	0	0	0	0
B4DI03;K7EJQ7;Q9BY50	0	0	0	0	0.566756	0.695303	0.69294	0.730621	0.787723	0.774005	1	0.985275	0.695262	0.705466
B4DJ07
B4DJ62;C9JM82;E7EPG2;E7EQM7;E7EX32;F8W9E5;G3XAH0;Q99719;Q99719-2	0	1	0	0	0	0	0	0.506936	0	0	0	0	0.836744	0
B4DJV2;O75390	0.0566858	0.0587542	0.0772415	0.0319602	0.0107891	0	0.00460236	0.0128579	0.0480654	0.229817	0.679101	1	0.463882	0.722697
B4DJV5;Q13610	0.754266	1	0.818081	0.621275	0.477662	0.600725	0.495672	0.281861	0.300217	0	0	0	0	0
B4DK77;Q9H6K4	0	0	0	0	0	0	0	0.0909298	0.198434	0.181145	1	0.485833	0.403111	0.509524
B4DL54	0.90787	1	0.648174	0.502437	0.282459	0.232027	0.265832	0.0749359	0.14184	0	0	0	0	0
B4DLJ1	0	0	0	0	0	0	0.0925656	0	0	0	0	0	0	1
B4DLN1	0	0	0	0	0	0	0	0	0	0.236513	1	0.342286	0.327261	0.0861845
B4DLP0;B8ZZF7;O00338;O00338-2	0.435362	1	0	0.770217	0.431756	0	0.153421	0.0685023	0.441912	0	0.990469	0	0	0
B4DR61;P61619	0.0422276	0	0.00545253	0.0248085	0.0596171	0.127438	0.16406	0.451415	0.521366	0.476873	0.922385	1	0.980776	0.524461
B4DR80;Q9Y6E0;Q9Y6E0-2	0.480945	1	0.5402	0.54464	0.376145	0.390437	0.318733	0.707715	0.871958	0.566366	0.430416	0	0.321095	0.749193
B4DTC4;C9J6H0;C9JAU4;C9JYH7;E7EX82;F8WDA4;G5E9U7;Q8NDX5;Q8NDX5-2;Q8NDX5-3;Q8NDX5-4;Q8NDX5-5;Q8NDX5-6;Q8NDX5-7	0	1	0	0	0	0	0	0	0	0	0	0	0	0
B4DUC8;Q13126	0.647445	1	0.413722	0.395688	0.225643	0.187577	0.190244	0.168098	0.0771599	0.040539	0.020264	0	0	0
B4DUJ5;Q8IWP9
B4DVN3;E7ESC7;Q7L5Y9;Q7L5Y9-3	0.160643	0.297019	1	0.641262	0.199712	0.323429	0.411053	0.153601	0.250797	0.142984	0.016448	0	0.164847	0.235179
B4DVT3;Q96SY0	0	0	0.165013	0.0683573	0.00678496	0.167403	0.220595	0.149553	0.177535	0	0	0.241587	0.219867	1
B4DXZ6;P51114	0.0490657	0	0	0	0.212363	0.38365	0.596532	0.633091	1	0.716529	0.546789	0.68308	0.663441	0.381483
B4DYU2;H3BQV3;Q96MW5	0.936878	0.856404	1	0.808058	0.564872	0.657652	0.601819	0.370304	0.419773	0.279891	0	0	0.192148	0
B4DYY6;Q75T13;Q75T13-2;Q75T13-3	0	0	0	0	0	0	0.465106	0.380865	0.843986	0.616627	0.837966	1	0.659821	0.819345
B4DZK5;Q9HAQ2;Q9HAQ2-2	0	0	0	0	0	0.493946	0	0	1	0.823108	0	0	0	0
B4E0E3;G3V1M5;Q9H6X4;Q9H6X4-2;Q9H6X4-3	0.147951	0	0.0825932	0.252721	0.634146	0.743485	0.599688	0.927382	1	0.668439	0.259566	0.284549	0	0.870545
B4E0T2;P50542;P50542-4	0.600003	0.630334	0.276843	0.0135641	0.00986314	0.0988687	0	0.138171	0.294354	0.855609	0.989681	1	0.303127	0.486984
B4E107;F5GXE4;O95260-2	0.536535	1	0.706718	0.5494	0.26618	0.302899	0.250832	0.182678	0.192947	0.229977	0	0	0.0640798	0.0817356
B4E1G1;Q9BUN8;Q9BUN8-2	0.0358132	0	0.0448586	0.0956592	0.10161	0.657256	0.638664	1	0.444709	0.428988	0.221787	0.324254	0.226779	0.426322
B4E1Q4;O14730	0.295159	0.525544	1	0.836903	0.551287	0.41851	0.347129	0.176404	0.216987	0.145192	0.09292	0.00781843	0.0515886	0
B4E1Z4	0.181853	0	0.339145	0.19068	0.0869428	0.478786	1	0.746487	0.883374	0.739333	0.643075	0.84823	0.438357	0.675075
B4E2Q0;P98194;P98194-4	0	0	0	0	0.764912	1	0.412774	0.593137	0.53979	0.77228	0.389654	0	0	0
B4E3T4;Q93062;Q93062-2;Q93062-3;Q93062-4;Q93062-5	0	0.153952	0.352854	0.438727	0.746533	0.500881	0.092758	0.249581	0.117432	0.174653	0.100193	0.0558935	0.52405	1
B5MC20;P0C870	0.585863	1	0.408695	0.428923	0	0	0	0	0	0	0	0	0	0
B5MC22;Q9UDX5	0	0	0	0	0	0.0624344	0.0853905	0.261258	0.356221	0.328995	0.608889	1	0.378361	0.707276
B5MC35;B5MCA1;B5MD16;Q96G28;Q96G28-2	0	0.387547	0	0.0309674	1	0.891852	0.88813	0.970668	0	0	0	0	0	0
B5MC51;P53671-3	0	0	0	0	0	0	0	0	0	0	0	0	0	1
B5MC53;B5MCF8;E7EX18;G5E9F5;P39210
B5MCF4;C9JDC5;P05230;P05230-2	0.687602	1	0.416016	0.371377	0.262095	0.152732	0.151134	0	0.100116	0	0	0	0	0
B5MCF9;O00541;O00541-2	0	0	0	0.042647	0.0707427	0.0874191	0.0472868	0	0	0.0444329	0.0412967	0.136338	0.0718427	1
B5MCH6	0	0	0	0	0	0	0	1	0	0	0	0	0	0
B5MCN7;Q15788;Q15788-2;Q15788-3
B5MCQ6;B5MCU6;B5MCV5;E7ETT9;Q96DB2;Q96DB2-2	0	0	0	0	0	0	0	0.960034	0.875381	0	1	0	0	0.716945
B5MCX7;C9JX82;D3YTC9;F8WB76;H7C3L3;Q6NXT1;Q6NXT1-2	1	0	0.587051	0	0	0	0	0	0	0	0	0	0	0
B5MD46;F8W9Y7;F8WCD1;H0Y2U5;H0Y5R9;H7C1Q1;H7C471;Q9BXI6;Q9BXI6-2	0	0	0	0	0	0	0	1	0.65582	0.0927656	0	0	0	0
B5MDF5;J3KQE5;P62826	0.782416	1	0.679686	0.455918	0.143707	0.151426	0.136936	0.0842364	0.0615096	0.0469258	0	0.000145908	0.0548554	0.0464545
B5MDL5;P53778;P53778-2	0.995078	1	0	0	0	0	0	0	0	0	0	0	0	0
B5MDU6;Q9H6V9;Q9H6V9-2	0.604993	0	0.0798577	0.0933866	0.177996	0.648913	0.479386	1	0.663717	0.426921	0.368517	0.371859	0.243321	0.249055
B5ME97;E7EW69;E7EX04;Q9P0V9;Q9P0V9-2;Q9P0V9-3	0.090765	0.0764559	0.331913	0.0965203	0	0.0573751	0.00818181	0.0621023	0.0825993	0.202183	0.140644	0.103066	1	0.162783
B5MEF5;Q8TER0;Q8TER0-3;Q8TER0-4;Q8TER0-5	0	0	0	0	0.0405301	0.0993415	0.291448	0.692204	0.62756	0.80667	0.598693	0.565801	0.189331	1
B7WNH4;E9PLH2;E9PNA8;E9PP42;M0QYU9;M0R0R3;M0R2G5;Q9BQ49	0	0	0	0	0	0	1	0.742593	0.577847	0	0	0	0	0
B7WNR7;Q5HYL7-4	0	0.561065	0.321255	0	0	0	0	0.131596	0.215304	0	0.532972	0.629823	1	0
B7WP74;Q9HCG8	0.281201	0.0967881	0.143626	0.199165	0.216268	0.214897	0.195297	0.245853	0.157182	0.124543	0	0.244428	0.179786	1
B7WPE2;Q32P44	0.803953	0.948776	1	0.759834	0.470369	0.410335	0.369206	0.24249	0.265652	0.2242	0	0	0	0
B7WPG3;C9IYN3;Q8WVV9;Q8WVV9-4;Q8WVV9-5;V9GYK2	0.486349	0.67397	0.647026	0.51835	0.177318	0.239149	0.283236	0.437288	0.329043	0.0661325	0	0.108244	0.721474	1
B7WPL0;Q9NVN3;Q9NVN3-1;Q9NVN3-3
B7WPL9;F8W9A8;Q6PFW1;Q6PFW1-2;Q6PFW1-3;Q6PFW1-4;Q6PFW1-5;Q6PFW1-6;Q6PFW1-7	0.171742	1	0.359997	0.118181	0.187992	0	0	0	0.189926	0	0	0	0	0
B7Z278;Q8WZA2;Q8WZA2-2;Q8WZA2-3;Q8WZA2-4;Q8WZA2-5	0	1	0.343137	0.430825	0.454628	0.290738	0.103798	0.196789	0.672414	0.484393	0.511773	0.107612	0.316224	0.557868
B7Z2R2;P14927;P14927-2	0.0486635	0	0	0.00430499	0.0258511	0.0375386	0.100699	0.161196	0.174655	0.440703	0.714787	1	0.705726	0.481075
B7Z2R7;Q5T8D3;Q5T8D3-2;Q5T8D3-3	0.291703	0.468928	0.199022	0.502862	0.099797	0	0.195743	0.319922	0.566667	0.733419	1	0.589746	0.77549	0.182487
B7Z2X5;H0YDC6	0.0933331	0	0.0632293	0.11471	0.452576	0	0	1	0	0.577351	0	0	0.702545	0.326121
B7Z493;E9PJX4;F8VWL3	0.747619	1	0.485233	0.501704	0.359109	0.0527686	0	0.192956	0.420151	0.323185	0.386664	0.197928	0.289809	0.572942
B7Z4L1;B7Z4U3;E7EPD9;E7EPW5;E9PCV1;G3XAH9;H7BXS2;Q9NRC1-2;Q9NRC1-3;Q9NRC1-4;Q9NRC1-5;Q9NRC1-6	0	0	0	0	0	0.189923	0.403351	0.545687	0.370048	0.325743	0.847441	1	0.634231	0.555382
B7Z4S1	0	0	0	0	1	0.723097	0.0109895	0.526431	0	0	0	0	0	0
B7Z4W8;E9PD09;Q96HH9;Q96HH9-2;Q96HH9-3;Q96HH9-4;Q96HH9-5	0	0	0	0	0	0	0.504101	0	1	0	0	0	0	0
B7Z5P7;O60711;O60711-2	0	0.936996	0	0	0.361989	0	0.395317	0.481324	0.500831	0.404663	0	0	0	1
B7Z6D5;Q96GQ7	0	0	0	0	0.031692	0	0.0324251	0.0475915	0	0	0	0	0.130499	1
B7Z6J7;H7C148;O75175	0.904974	0.742354	0.474742	1	0.828864	0.576027	0.789265	0.773156	0.426625	0.448473	0.38661	0.377412	0.619217	0
B7Z6Q0;Q12980	0	0	0	0	0.330125	0.317495	0	1	0.594187	0.515812	0.447704	0	0.27567	0
B7Z7D2;E9PQY3;P11117	0.124679	0	0	0	0.203508	0.344006	0.592671	0.623279	1	0.894425	0.643968	0.264024	0.74366	0.707358
B7Z7P8;P62495;P62495-2	0.686059	1	0.371797	0.338016	0.0987439	0.202125	0	0.109496	0.369447	0.362242	0.49593	0.441053	0.297861	0.323658
B7Z8H2;O14717;O14717-2;O14717-3;O14717-4;O14717-5;O14717-6;Q7Z3E4	0	1	0	0	0.796921	0	0	0.711698	0	0	0.868366	0.589381	0.843115	0
B7Z8Q8;Q6NUS8	0.111748	0	0.0488276	0.115632	0.179391	0.282837	0.536296	1	0.810561	0.616524	0.672666	0.819317	0.661317	0.874738
B7Z931
B7Z9C2;F5H4R6;F8VV59;F8VY35;F8W020;F8W0J6;F8W118;F8W543;H0YH88;H0YHC3;H0YIV4;P55209;P55209-2	1	0.404013	0.24144	0.656203	0.511439	0.176102	0.207842	0.319474	0.14287	0.0646472	0.0996764	0	0.111321	0
B7Z9I1;P11310;P11310-2;Q5T4U5	0.0613531	0.110854	0.0854804	0.0534562	0.0201631	0.00967831	0.0150799	0	0.0103475	0.11902	0.626657	1	0.661119	0.525892
B7ZAP0;F5H8L0;Q5R372-5;Q5R372-6;Q5R372-7;Q5R372-8	0.850161	1	0.524509	0.475119	0.346804	0.261599	0.249873	0.233013	0.187982	0	0	0	0	0.0888495
B7ZAQ6;B7ZAQ6-2;B7ZAQ6-3;P0CG08	0	0	0	0	0.571226	0.665743	1	0.875778	0.765951	0.672733	0.549504	0	0.73896	0.594391
B7ZBB8	0.465307	1	0.883047	0.83764	0.37636	0.383744	0.189656	0.437465	0.0711538	0	0	0	0	0
B7ZBC8;B7ZBC9;O75449
B7ZC38;Q9NR46	1	0.723791	0.657817	0.660142	0.470197	0.312297	0.374472	0.36297	0.230625	0.196447	0.0663519	0	0.197365	0.0114248
B7ZKQ9;Q8WTV0-2;Q8WTV0-4	0.133019	0	0.0779514	0.0538769	0.0695573	0.159557	0.351816	0.682234	0.631134	0.884382	0.716577	0.500227	0.31423	1
B7ZL88;Q8N8Q8	0	0	0	0	0	0.0445454	0.0706741	0.187177	0.194172	0.271567	0.742728	1	0.493805	0.530452
B7ZLQ8;E5RJM0;Q17RY0;Q17RY0-2	0	0	0	0	0.164906	0.708537	0.360902	1	0.883723	0	0	0	0.924453	0
B7ZM68;Q6ZNL6;Q6ZNL6-2	0	0	0	0	0	0	0	1	0.407636	0	0	0	0	0
B8ZZ19;H0Y3U0;P20472	1	0.902702	0.437787	0.591114	0.364337	0	0	0	0	0	0	0	0	0
B8ZZ47;H0Y714;Q96G21	0	0	0	0	0	0	0	0	0	0	0	0	0	1
B8ZZ50;B9A044;C9JEL3;O60573;O60573-2	1	0	0	0.0688627	0.266094	0	0.351087	0.140959	0.128843	0.805383	0	0	0.64281	0
B8ZZ98;Q8WVK2
B8ZZ99;F8WCZ3;Q96NT0;Q96NT0-2	0	0	0	0	0.236305	0.324822	1	0.634624	0.354188	0.300782	0	0	0	0
B8ZZD4;Q86VP1;Q86VP1-2;Q86VP1-3;Q86VP1-4	0.205741	0	0	0	0	0	0.391838	0.192288	0.344516	1	0.164425	0	0	0
B8ZZF5;C9J5M4;Q9H8M9	0.121193	0	0	0.0414365	0.106879	0.106262	0.365129	0.563953	0.546824	1	0.636697	0.429486	0.282905	0.98208
B8ZZJ6;H7C1S9;Q8TD22	0.0369897	0	0.0195522	0.0196018	0.0284971	0.0657354	0.0698476	0.165933	0.181605	0.357875	0.770818	1	0.488883	0.526263
B8ZZK5;O43924
B8ZZQ6;P06454;P06454-2	0.591878	1	0.254024	0.166069	0.0317943	0.0243077	0.016759	0	0.0117003	0.0127705	0.0184934	0.0120262	0.014792	0.0419734
B8ZZU8;Q15370;Q15370-2	0.542638	1	0.538888	0.515883	0.437155	0.267155	0.223011	0.0922351	0.0871433	0.0487222	0.0389128	0	0.0601787	0.0425011
B8ZZV9;B8ZZX2;Q9H8M1;Q9H8M1-2	0	0	0	0	0	0	0	0	0	0.420724	1	0.93926	0.595652	0.498765
B8ZZY8	0	0.717451	1	0.867373	0	0	0	0	0	0	0	0	0	0
B8ZZZ1;F8W8K9;G5E966;Q96PC3;Q96PC3-2;Q96PC3-3;Q96PC3-4	0	0	0	0	0.795218	1	0	0	0	0	0	0	0	0
B9A063;Q6PIF6	0	0	0	0	0	1	0	0	0	0	0.729704	0	0	0
B9EGA3;J3KMX2;Q92925;Q92925-2;Q92925-3	0.0325457	0	0.0897259	0.0680012	0.0657533	0.0459842	0.0430307	0.0787946	0.0709044	0.0729841	0.121258	0.163401	0.276112	1
B9EJG8;B9EJG8-2;D6RAQ9;D6RDW6	0	0	0	0	0	0	0	0.703961	1	0	0	0	0	0
B9ZVN9;O95602	0	0	0	0	0	0	0	0.5841	0	0	0	0	0	1
C4AMC7;Q6VEQ5	0.235781	0.129346	0.285179	0.323613	0.709069	1	0.98359	0.616815	0.398429	0.428786	0	0.0669019	0.308477	0.223376
C4B7M2;Q96JI7;Q96JI7-2;Q96JI7-3	0	0	0.743641	0	0	0	0	1	0	0.109717	0	0	0	0
C4P0D6;C4P0D8;Q99598	0.642631	1	0.786387	0.540639	0.374014	0.235687	0.206151	0.20402	0.137031	0.0732054	0.0178969	0	0.0549321	0.031309
C9IYN7;C9J2D6;C9J9N8;C9JA82;C9JEX8;C9JLH5;Q0PNE2;Q0PNE2-2	0	0.363716	1	0.526055	0.170183	0.126298	0.0426471	0	0	0	0	0	0	0
C9IYT0
C9IZ93;C9J9P8;C9JF62;Q969M7;Q969M7-2;Q969M7-3;Q969M7-7
C9IZF6;P41247	0	0	0	0	0	0	0	0	0	0	0.883562	1	0.753554	0.78144
C9IZU8;C9J9T0;Q96AT9	1	0.828155	0.691196	0.580616	0.536691	0.495171	0.162698	0.202112	0.138228	0.232499	0	0	0	0
C9J050;C9JEJ2;P49585	1	0.371043	0	0.309468	0.321661	0.163991	0.218303	0.298356	0.233957	0.0763324	0.0797006	0.196175	0.206521	0.456358
C9J066;E9PN67;Q8N4C6;Q8N4C6-10;Q8N4C6-11;Q8N4C6-2;Q8N4C6-4;Q8N4C6-5;Q8N4C6-6;Q8N4C6-7;Q8N4C6-9	1	0	0	0	0	0	0	0	0	0	0	0	0	0
C9J0A4;P57723;P57723-2	0	0	0	0	1	0	0	0	0	0	0	0	0	0
C9J0A7;Q9UQN3;Q9UQN3-2	1	0.534729	0.505712	0.276222	0.257211	0.161972	0.1397	0.0869801	0.0731762	0.102529	0.0583842	0.0285253	0	0.0738684
C9J0I9;Q86WB0;Q86WB0-2;Q86WB0-3	0.558588	0.758071	0.314404	0.309882	0.124814	0.0511955	0.0041774	0	0.0977844	0.135842	0.18486	0.25389	1	0.697988
C9J0J0;Q96EE4	0	0	0	0	0.369986	0.587853	1	0.755629	0.491389	0	0	0	0	0
C9J0J7;G5E9Q6;P35080-2	0.620098	1	0.486609	0.352761	0.285082	0.118986	0.16317	0.127745	0.108291	0.0653396	0	0	0.0414376	0.025028
C9J0K6;P30626;P30626-2;P30626-3	0.599455	1	0.600484	0.450315	0.338042	0.208441	0.173213	0.0812602	0.0733639	0.0630828	0.00949682	0.00116785	0.00976122	0
C9J159;F5H6W4;Q9H992	0	1	0	0	0	0	0	0	0	0	0	0	0	0
C9J165	0	0.657086	0	0.848355	0	1	0	0	0	0	0	0	0	0
C9J1C6;Q9P0P0	0.618434	1	0.652946	0.406983	0.3553	0.317056	0.207134	0.0721181	0	0	0	0	0	0
C9J2C0;Q9NY65;Q9NY65-2	1	0.849068	0.66483	0.490044	0.662419	0.461389	0.479214	0.288114	0.0488797	0.23041	0	0	0	0
C9J2P9;Q75N03;Q75N03-2
C9J2Y9;P30876	0.26676	0.292082	0.511175	0.482646	0.135521	0.202174	0.10622	0.123601	0.106742	0.0857276	0	0.12542	0.0861832	1
C9J365;C9JA28;Q9UNL2;Q9UNL2-2
C9J3D7;Q9UKG9;Q9UKG9-3	0.527719	0.802079	0.295297	0.271333	0.0767637	0	0.00143042	0.100041	0.222978	0.591023	1	0.865506	0.922182	0.227901
C9J3R8;E7ETS9;O60513	0	0	0	0	1	0.823625	0	0.984323	0	0	0	0	0	0
C9J406	0.0308698	0.000202005	0	0.00301382	0.0138555	0.0346613	0.0755769	0.133214	0.23024	0.417637	0.876981	1	0.558136	0.511178
C9J494;Q9H000;Q9H000-2	0.245367	1	0.615995	0.0917952	0.0903351	0.140701	0	0.265845	0.643463	0.34536	0.200913	0.113682	0.0151544	0.338752
C9J4X5;Q96EU6;Q96EU6-2;Q9H160;Q9H160-2	0	0	0	0	0	0	0	0	0	0	0	0	0	1
C9J4Z3;P61513	0.0199688	0	0.0695	0.118942	0.162931	0.218333	0.188584	0.275172	0.473676	0.545109	0.774276	1	0.672188	0.615485
C9J555;J3QLM1;J3QLS1;Q14849	0	0	1	0.0335551	0	0	0	0	0	0	0	0	0	0
C9J597;C9JF31;Q9BV87	0	0.781665	1	0	0.502815	0	0	0	0	0	0	0	0	0
C9J5D1;E7EQ69;Q9GZZ1	0.132309	0.104803	0.156623	0.576618	1	0.955078	0.818853	0.670938	0.615279	0.5534	0.139309	0.0926463	0.268282	0
C9J5N1;Q9BTE6;Q9BTE6-2;Q9BTE6-3	0.637619	1	0.744786	0.501962	0.302456	0.310216	0.354037	0.20904	0.173579	0.192	0.066738	0	0.10497	0.0423336
C9J6G3;C9J7M1;O95749	0.322354	1	0.807976	0.80076	0.437044	0.280465	0.224098	0.147633	0.187938	0	0	0	0	0
C9J6K0;Q13103	0	0	0	0	0	0	0	0	0	1	0	0	0	0
C9J6K3;C9JM54;Q9HC52	0	0	0	0	0	0	0	0	0	0	0	0	0	1
C9J6P4;Q7Z2W4	0.239565	0.00286503	0.178529	0	0.165808	0.356007	0.340328	0.524337	0.611567	0.729298	0.842538	0.918971	1	0.538055
C9J6W0
C9J712;P35080	0.928446	0	0.549142	1	0.243274	0	0	0	0	0	0	0	0	0
C9J758;Q969T7;Q969T7-2	1	0.944061	0.586844	0.731689	0.400573	0.223192	0.154482	0.146476	0.112887	0	0	0	0	0
C9J798;E5RK78;E7ERK1;F5GXT2;F8W6L0;O43374;O43374-2	0	0	0	0	0	1	0	0	0	0	0	0	0	0
C9J7E5;Q9Y5L0;Q9Y5L0-1	0.920424	1	0.889906	0.839949	0.379486	0.266992	0.139286	0.176111	0.161004	0.139649	0	0.137487	0.135067	0.106035
C9J7E8;Q9UL63;Q9UL63-2	0	0	1	0.888669	0	0	0	0	0	0	0	0	0	0
C9J7K9;C9J9P4;H7C5I5;O15162;O15162-2	0	0	0	0	0.216957	0.219849	0.335714	0.592738	0.686153	0.564658	0.600536	0.614549	0.250167	1
C9J813	0.289216	0.617686	0.104535	0.334952	0.178762	0	0.122743	0.0909595	0.348661	0.444669	0.332703	0.101014	1	0.44116
C9J8S2;Q99969	0.262856	0	0.0453927	0.119247	0.267005	0.521782	1	0.665529	0.895464	0.543307	0.578083	0.590372	0.462886	0.641088
C9J8T4;C9JYN7;O43567	0	0	0	0	0	0	0.743699	0.567407	0.602732	1	0	0	0.755785	0
C9J975;E7ESL9;Q96P47;Q96P47-2;Q96P47-3;Q96P47-4;Q96P47-6	1	0	0.769785	0	0.522893	0	0	0	0.535296	0	0	0	0	0
C9JA08;Q96D46	0.368733	1	0.249687	0.292748	0.437294	0.372834	0.190715	0.274399	0.112022	0.223693	0.0399217	0	0.361363	0.404283
C9JA90	0	0	0	0	0	1	0	0	0	0	0	0	0	0
C9JAX1;Q16595	0.182713	0.253939	0.135417	0.119527	0.0390419	0.0158073	0.0134083	0	0.0276239	0.240186	0.612985	0.927484	0.662549	1
C9JB28;C9JPS5;Q6ZMH5	0	0	0	0	0.0889085	0.296316	0.413738	0.600374	1	0.760642	0.865343	0.784276	0.327257	0.525501
C9JB30;Q9UPY8	0.864149	1	0.721158	0.681093	0.52306	0.596493	0.496541	0.256344	0.128036	0.24311	0.19128	0	0.0314771	0.195332
C9JBG5;E9PMC3;F5H8L4;Q8NBJ9;Q8NBJ9-2	0.360059	0	0.220035	0.484699	0.58645	0.524814	0.918233	0.543376	1	0.483083	0.386734	0.581036	0.283073	0.674041
C9JBI3;P78330	0.708048	1	0.650066	0.458569	0.259304	0.192667	0.115805	0.105502	0.0805422	0.0530558	0.0109585	0	0	0.00775892
C9JBY7;Q9Y291	0	0	0	0	0	0	0	0	0	0	0.776958	1	0.46098	0.241197
C9JCC6;E9PQX9;Q14919;Q14919-2	0.198284	0.0473875	0.0231882	0.0531	0.104445	0.0696768	0.141779	0.116812	0.0562999	0.147476	0	0.139329	0.0820331	1
C9JCU6;F2Z2B3;F8WCP4;Q12851;Q12851-2	0	0	1	0	0	0	0.273362	0	0.173613	0	0	0	0	0
C9JD37	0	0	0	0	0	0	0	0	0	0	1	0	0.502563	0
C9JDZ2;Q9NVQ4;Q9NVQ4-2;Q9NVQ4-3	1	0.75188	0.198043	0	0	0	0	0.0672017	0	0	0	0	0	0
C9JEG3;Q9UBQ6	0	0	0	0	0.749217	0.819709	1	0	0.432543	0	0	0	0	0
C9JEG4;H7BZE4;H7C482;Q01449	0	0	0	0	0	1	0.224051	0.499952	0.440452	0.42165	0	0	0	0
C9JEH3;C9JG97;Q13685	0.674668	1	0.604715	0.510543	0.34531	0.199695	0.180887	0.11705	0.104283	0.0656766	0.0759392	0	0.037741	0.0143115
C9JEK0;C9JP86;Q08AI8	0	1	0.839199	0.442545	0	0	0	0	0	0	0	0	0	0
C9JER6;P61366
C9JF50;E9PLU1;E9PRK5;E9PRW1;E9PSD6;Q9H019;Q9H019-2;Q9H019-3	0	0	0	0	0	0	0.29589	0.439463	0.320103	0.600657	1	0.901279	0.799533	0
C9JFE4;Q13098;Q13098-5;Q13098-7	0.641375	1	0.958454	0.695434	0.343942	0.284372	0.192575	0.164969	0.14674	0.0604091	0.00272678	0	0.032361	0.0399147
C9JFR7;P99999	0.182586	0.186154	0.0294675	0.00206959	0	0.0343391	0.0766141	0.0956465	0.202969	0.329653	0.971971	1	0.510944	0.440246
C9JFV4;Q8IZL8	0.462749	0.458567	0.23169	0.40561	0.228398	0.171371	0.230112	0.11315	0.109055	0	0.17666	0.346855	0.241244	1
C9JFX4;E9PLG6;E9PSD9;Q6IA17;Q6IA17-2	0	0	0.154402	0.324291	0.719626	0.595641	0.645503	0.483144	0.710542	0.534899	0.145071	0.343395	0.184779	1
C9JG87;Q9NYK5;Q9NYK5-2	0	0	0.0925594	0	0.0808719	0	0.0754516	0.0645701	0.152208	0.289724	0.862482	1	0.527066	0.543468
C9JH00;O75155;O75155-2	0.350187	0.724615	1	0.398082	0.392622	0.549742	0.219585	0.248614	0.282168	0.154279	0	0	0	0
C9JHD7;C9JJK9;Q86YP4;Q86YP4-2;Q86YP4-3	0	0	0.167645	0	0	0	0	0	0	0	0	0	0.398375	1
C9JIF9;P13798	0.642103	0.959518	1	0.617391	0.320208	0.273508	0.222638	0.163891	0.161181	0.0729424	0.0361129	0	0.024596	0.018064
C9JIT1
C9JIZ6;P07602;P07602-2;P07602-3	0.121648	0	0	0.105644	0.324785	0.708446	1	0.853912	0.532193	0.296481	0.254135	0.266193	0.406249	0.424347
C9JJ19;P82930	0	0	0	0.0318403	0.0329844	0.0477068	0.119824	0.0835094	0.118607	0.139684	0.695914	1	0.649377	0.47401
C9JJM2;Q96MV1;S4R434	0	0	0	0	0.567697	0.905715	0.776153	0.968747	0.916809	0.746201	1	0.771662	0.529539	0.421247
C9JJN9;Q8N3P4;Q8N3P4-2;Q8N3P4-3	0	0.755029	0.726391	1	0.825606	0.796759	0.827498	0.677945	0.974492	0.80038	0	0	0	0
C9JJT5;G3V325;P56134-2;P56134-4	0.0778176	0	0	0	0.0838124	0.0927638	0.170742	0.135979	0.171635	0.184251	0.497595	1	0.38615	0.585034
C9JJX6;E9PDC3;O00192;O00192-2	0	0	0	0	0	0.0431458	0.0671136	0.192133	0.465179	0.401565	0.584881	0.493812	0.198479	1
C9JK83;O95630;O95630-2	1	0	0.40984	0.675942	0.310295	0.198478	0.374772	0.230767	0.204258	0	0	0	0	0
C9JKL2;C9JPX5;O95772;O95772-2	0	0	0	0	0	0	0	0	1	0	0	0	0	0
C9JLB7;Q96HP4;U3KQU8	0.145231	0.12092	0.130462	0.0911544	0.0733872	0.0623952	0	0.066094	0.045512	0.231985	0.553633	1	0.721682	0.575145
C9JLU1;P52434;P52434-4	0.671319	1	0.799308	0.57006	0.303864	0.203594	0.138403	0.0993028	0.105397	0	0.131571	0.161083	0.0770035	0.641967
C9JLW8;I3L2L5;I3L4Q0	0.991895	0.282997	1	0.787647	0.517652	0.662758	0.435241	0.725161	0.230222	0.344562	0	0	0.579253	0
C9JNE2;Q9Y530	0.809406	0.609045	0	0.520735	0.30952	0	0	0	0	0.19635	0	1	0.371689	0.352178
C9JNW5;C9JXB8;P83731	0.0298327	0	0.0597844	0.0975661	0.182752	0.263827	0.416783	0.364205	0.61242	0.525484	0.577042	1	0.89882	0.471702
C9JNZ0;C9JRY4;Q96IW7	0	0	0	0	0	0	0.590329	0	1	0	0	0	0	0
C9JP16;O75718	0	0	0	0	0.15471	0.405801	0.850357	1	0.659992	0.540397	0.347164	0.395285	0.364902	0.242505
C9JP85;Q16656;Q16656-2;Q16656-4	0	0	0	0	0.0208725	0	0	0.0350676	0.0329454	0	0	0	0.0620939	1
C9JPG5;Q13275;Q13275-2
C9JQ41;H7C525;Q4VC31	0.813077	0.360349	0.18775	0.28708	0.0949766	0.0592933	0.161194	0.00639991	0	0.0370791	0.782391	0.788484	1	0.14862
C9JQ48;E2QRF5;Q9H8U3	0	0	0	0	0	0	0	0	0	0	0	0	1	0
C9JQ60
C9JQD4;O43447	0.554907	0.920641	0.671274	0.539997	0.538065	0.505332	0.36864	0.205468	0.0697224	0.365407	0	0.550532	0.15672	1
C9JQI7;C9JQI7-2;D6RC30	0	0	0	0	0	0.310764	0.754913	0.701414	0.470236	1	0.649073	0.306594	0.216528	0.935756
C9JQS9;E7ETT1;E7ETT4;E7EX59;E9PDR0;P05166;P05166-2	0.0390656	0.049558	0.10927	0.0642593	0.0142683	0.0113204	0.005231	0	0.0280638	0.152304	0.57466	1	0.730092	0.603724
C9JQV0;H7C0T1;H7C2R9;Q9BRJ6	0	0	0	0	0.210969	0.292215	0.404156	0.305149	0.372163	0.502392	0.530943	0.422496	1	0.335846
C9JR56	0	0	0	0	0	0	0	0	0	0.196157	0.430975	1	0	0.187192
C9JRD2;P25686;P25686-2	0.571444	1	0.468332	0.3841	0.282665	0.201296	0.222165	0.232976	0.0964279	0.154603	0	0.0366323	0.0504733	0.22085
C9JRZ6;Q9NX63	0.0208683	0	0.00376452	0.00700095	0.028768	0.0308231	0.0594712	0.124633	0.185425	0.491677	1	0.998917	0.746864	0.7352
C9JS50;Q687X5
C9JSU1;Q9Y608;Q9Y608-2;Q9Y608-4;Q9Y608-5	0.142553	0.081898	0.256268	0.0502829	0	0.143459	0.230649	0.273572	0.216569	0.384906	0.390588	0.498265	0.508915	1
C9JUQ8	0	0	0	1	0	0	0	0	0	0	0	0	0	0
C9JW74;C9JWU9;Q5EB52;Q5EB52-2;Q5EB52-3	0	0	0	0	0	0	0.151845	0.078684	0.234337	0.159746	0.2927	1	0.653885	0.873879
C9JXM5;G5E9W1;Q7Z3E1	0	0	0	0	0.464497	0.333544	0.50538	0.538782	0.361025	0.643951	1	0.501777	0	0
C9JY79;M0QZQ3;Q9H254;Q9H254-4	0.114203	0	0	0	0	0	0.213282	0	0	0	0	0.387459	0	1
C9JYJ6;Q4L180-3;Q4L180-5;Q4L180-7	0.158394	0.112792	0.13013	0.0609296	0	0.0440458	0.0967766	0	0.0489986	0.229377	0.587116	0.747278	1	0.556202
C9JYM0;O75817	0	0	0.34619	0.333554	0.357301	0.397665	0.481592	0.763924	1	0.619677	0.811541	0.589354	0.727369	0.991134
C9JYS5;J3KS67;J3QL47;J3QL63;K7ENL4;Q96ET8-3;Q9NYZ1	0	0	0	0	0	0.986821	0	0	1	0	0	0	0	0
C9JZ38
C9JZB3;Q16821
C9JZF7;G5E9W2;Q9P2E5;Q9P2E5-2	0	0	0	0	0.305389	0.862127	1	0.69648	0.648671	0.48684	0	0	0	0
C9JZG9;C9JZY6;P62256	0.727139	1	0.698627	0.749631	0.429104	0.361776	0.299367	0.2232	0.13384	0.21228	0.0597515	0	0.0465802	0.0253005
C9JZI1;P35249;P35249-2	0.0721483	0	0.124399	0.132352	0.167226	0.163546	0.111179	0.173938	0.193463	0.348027	0.207882	0.230571	0.231988	1
C9JZI7	0.673501	1	0.781411	0.615866	0.589398	0.43488	0.417049	0.241943	0.175817	0.0882534	0.0340987	0	0.103908	0.0802091
C9JZR2;O60716;O60716-10;O60716-11;O60716-13;O60716-2;O60716-3;O60716-5;O60716-9	0.093637	0.0052729	0	0.0142523	0.0369833	0.0754178	0.140525	0.301565	0.496381	0.512081	0.598267	0.480908	0.253005	1
C9K058;Q9H2H8	0.921105	1	0.450248	0.355246	0.416786	0.231007	0.230735	0.199459	0.135636	0.127293	0.0488395	0	0.048803	0.0723488
C9K0C8;Q9NS00;Q9NS00-2	0	0	0	0	0	0	1	0.816089	0.65983	0	0	0	0	0
C9K0I9	0	0	0	0	0	0	0	0.0338238	0.257662	0.331486	0.560073	0.362026	0.13002	1
D3DQV9;H0Y3P2;P78344;P78344-2	0.557641	0.921235	1	0.94608	0.835336	0.619172	0.59912	0.469049	0.481424	0.33988	0.0667391	0.056214	0.270251	0
D3DUJ3;K7EIE9;K7EQG9;P17706;P17706-2;P17706-3;P17706-4	0.714403	0	0.125553	0	0.233047	0.702001	0.487838	1	0.959167	0.344023	0	0	0.647179	0
D3DWX8;P98173;P98173-2;P98173-3;Q5HY75	0	0	0	0	0.315014	0.970397	0.824461	1	0.917294	0.594423	0.338551	0	0	0.226865
D3YTA9;F6U1T9;P63098	0.681858	1	0.620028	0.654152	0.539721	0.294507	0.166917	0.159283	0.139213	0.13673	0.0544142	0	0.147596	0.0792655
D3YTC7;Q9UBM1;Q9UBM1-2;Q9UBM1-3
D5H3J5;Q2L6G2	0	0	0	0	0	0	0	0.0744725	0.205275	0	0	0	0	1
D6R927;D6R946;D6R9K5;D6R9X3;D6RA45;D6RAT2;D6RB37;D6RBQ8;D6RCM1;D6REC2;D6REP3;D6RF98;D6RIV8;D6RIZ8;Q06330;Q06330-4;Q06330-5;Q06330-6;Q06330-7	0	0	0	0	0	0	0	0	0	0	0	0	0	1
D6R938;Q13557;Q13557-10;Q13557-11;Q13557-12;Q13557-3;Q13557-4;Q13557-5;Q13557-6;Q13557-8;Q13557-9	0.505285	0.377939	0.825356	1	0.484053	0.477411	0.401178	0.349496	0.192446	0.313235	0.117583	0.235095	0	0.175916
D6R9C3;H0UI06;P14406	0	0	0	0	0	0	0	0	0	0.433397	0.700706	0.984277	1	0
D6R9C7
D6R9P3	0	0.0980965	0.189729	0.278302	0.200024	0.121264	0.209847	0.116515	0.130491	0.14552	0.121048	0.0858868	0.547961	1
D6R9P8;Q6AWC2;Q6AWC2-4;Q6AWC2-6	0.459565	0	1	0.63143	0.329954	0.169762	0.265517	0	0.265211	0.170779	0	0	0	0
D6R9S2;D6RIC1;H0Y8L2;H0YEZ3;H0YJP6;P59282	1	0	0.51566	0	0.759253	0.382394	0.217414	0	0	0	0	0	0	0
D6R9S7;D6RDB0;D6RHE3;Q96GZ6;Q96GZ6-2;Q96GZ6-5;Q96GZ6-6;Q96GZ6-7;Q96GZ6-9	0	0	0	0	0	0	0	0	1	0	0	0	0	0
D6R9Z7;P15954	0.0195647	0	0	0.00228792	0.0108005	0.0220197	0.0387226	0.0498904	0.116546	0.308479	0.698674	1	0.609532	0.656414
D6RA47;D6RE79;D6RIZ4;Q14728	0	0	0	0	0.0862732	0.404713	1	0.520326	0.732031	0.384479	0.448656	0	0	0.558775
D6RA57;D6RC31;D6RE67;H0Y9X1;Q96EY4
D6RA82;P12429	0.872297	1	0.75059	0.560256	0.352944	0.256747	0.239723	0.0848651	0.0976363	0.139517	0.0381829	0	0.0307139	0.0506618
D6RA96;Q9NZ71;Q9NZ71-2;Q9NZ71-4;Q9NZ71-6;Q9NZ71-7;Q9NZ71-8;X6R5I7	0	0	0	0	0.385436	0	1	0	0	0.364768	0	0	0	0.200275
D6RAC8;Q9NQ76;Q9NQ76-2;Q9NQ76-3
D6RAD4;P50613	0.250913	0.763977	0.195877	0.310281	0.129432	0.268893	0.0740645	0	0.116215	0.180622	0.200188	0.664322	1	0.964334
D6RAD5	0	0	0	0	0	0	0	0	0.323818	0.256993	0.114251	1	0.511368	0.4214
D6RAJ6;Q9UKT5;Q9UKT5-2
D6RAN1;D6RF83;D6RH06;H7BYK4;Q9NR12;Q9NR12-2;Q9NR12-3;Q9NR12-4;Q9NR12-5;Q9NR12-6	0.148748	0	0.182172	0.139657	0.153953	0.0566239	0.109186	0.104478	0.212712	0.430034	0.259292	0.335776	0.520987	1
D6RAN8;H7C5U8;Q9P0M9	0	0	0	0	0	0	0	0.131145	0.362252	0	0.857276	1	0.503139	0.468564
D6RAR4;Q04756
D6RAZ3;E7EMP6;Q96FZ2
D6RB81;Q9UHK6;Q9UHK6-5	0.717519	0.948659	0.404693	0.255602	0.0930293	0.047807	0.0541771	0	0.109035	0.295934	0.868283	1	0.977317	0.415701
D6RB89;P50120	0.872348	1	0.425964	0.451873	0.303049	0.183745	0.153557	0.111875	0.0803324	0.0460288	0	0	0	0
D6RBM8	1	0	0.100471	0.124938	0	0	0	0	0	0	0	0	0	0.401795
D6RBN6	0	0	0	0	0.27715	0	1	0	0.0528148	0	0	0	0	0
D6RBR7;Q9Y3S2	0	0	0	0	1	0	0	0.446257	0	0	0	0	0	0
D6RBW1;P06730;P06730-2;P06730-3	0.877306	0.510089	0.586537	1	0.70146	0.342594	0.486404	0.416456	0.248667	0.404787	0.234455	0.223923	0.162845	0
D6RBY0;D6RJG8;Q8TAC1;Q8TAC1-2
D6RCC4;D6RCC9;Q8NEC7	0.670956	1	0.609602	0	0	0	0	0	0	0	0	0	0	0
D6RCE7	0	0	0	0	0	0	0	0	0	0	0	0	0	1
D6RCM8;O95379;O95379-2;O95379-3;O95379-4
D6RCP5;Q8N264;Q8N264-2;Q8N264-3	0	0.0315079	0.000948908	0	0.0530237	0.0438016	0	1	0.0122011	0.0489119	0.389857	0	0.377906	0.0979092
D6RDG3	0	0	0	0	0	0.22108	0.812462	1	0.217887	0.217904	0	0.085865	0	0
D6RDG8;D6RGZ4;O43791	0	0	0	0	0	0	0	0	0	0.222068	1	0.188867	0	0
D6RDK6	0	0	0	0	0	0	0	0	0	0	0.275882	0	1	0
D6RE84	0.548152	1	0.271944	0.263869	0.216275	0.5373	0.307527	0.162406	0.0208936	0.138677	0.0322485	0.0208946	0	0.0577159
D6REA0;O75879	0.0807442	0.108667	0.10234	0.0518428	0.0192705	0.0157407	0.00929374	0	0.025686	0.219324	0.683602	1	0.6708	0.517363
D6REK2;H0Y9T3;Q8WV44;Q8WV44-2;Q8WV44-4	0	0	0	0	0.288883	0.186318	0.211034	0	0.185896	0	0	0	0	1
D6RER5;D6RGI3;Q9NVA2	0.0689386	0.292248	0	0.00684627	0.0104023	0.0266338	0.0719641	0.168649	0.323227	0.204994	0.223131	0.305859	1	0.190975
D6REX3	0.520349	0.873192	0.81546	1	0.905897	0.738993	0.568638	0.333397	0.299558	0.177138	0.0594495	0.0442905	0.104681	0
D6REY2;P23508;P23508-2	0.482196	1	0.669012	0.408652	0.394431	0.257964	0.261523	0.278852	0.166082	0	0	0	0	0
D6RF35;P02774;P02774-3	0.11099	0.068608	0.0258237	0	0.084331	0.567329	1	0.811131	0.887681	0.47745	0.361901	0.278531	0.35934	0.152789
D6RF43	0	0	0	0	0	0	0	0	1	0	0	0	0	0
D6RF48;Q9P2W9	0.103337	0	0.167608	0.43046	0.350167	0.774859	0.972457	0.986852	1	0.712347	0.838996	0.756546	0.551727	0.593123
D6RF86;P55285;P55285-2
D6RFG8;P27707	0	0	0	0	0.466531	0	0.842091	0	0.309067	0	0.0338334	0.179298	0	1
D6RFI1	0.410442	1	0.228813	0.322698	0	0	0	0.261803	0	0.106077	0	0	0	0
D6RFI3;E7EQR8;Q9GZM5	0	0	0	0.458544	0.528119	0.785095	1	0.788534	0.383037	0.370795	0	0	0	0
D6RGG3;Q99715;Q99715-4	0	0	0	0	0	0	0	0	0	0	0	0	0	1
D6RGK3;D6RHW1;D6RIE8;D6RIV9;D6RIY1;Q16594;Q9HBM6	0.0507515	0.0532683	0.137091	0.125995	0.0530684	0.0540446	0.0546978	0.0567721	0.0497092	0.0803066	0	0.117162	0.0735687	1
D6RGK9;H0Y9C1;H0Y9Z5;Q96LI5	0	0	0.579613	0	0.210417	0.651757	1	0	0	0	0	0	0	0.946685
D6RGZ3;Q8N1W1;Q8N1W1-3;Q8N1W1-4;Q8N1W1-5;Q8N1W1-6	0	0	0	0	0	0	0	0	0	1	0	0	0	0
D6RH21	0	0	0.444003	0	0	1	0	0	0	0	0	0	0	0
D6RHG0;P78383	0.131773	0	0	0.233836	0.570987	0.603427	0.551628	0.45432	1	0.534808	0.597268	0.568613	0.509217	0.712036
D6RHH9;Q8TCT1;Q8TCT1-2;Q8TCT1-3	0.770301	1	0.610761	0.36323	0.311493	0.230998	0.163203	0.112804	0.0710669	0.0142126	0.128655	0	0	0.0402814
D6RHX8;F8W9W2;P43250;P43250-2;P43250-3	0.275267	0	0.215194	0	0	0.197769	0.367461	0.305394	0.30747	0.354027	0.160343	0.319786	0.367414	1
D6RID8;Q13888;Q6P1K8	0	0	0	0.0941862	0.119464	0.141698	0.160074	0.222362	0.2109	0.271192	0.223423	0.161909	0.285007	1
D6RIE3	0.0195659	0	0	0	0.0139318	0.0506126	0.090532	0.122749	0.225063	0.297294	0.651256	1	0.669056	0.618291
D6RIG4;Q9HCL0;Q9HCL0-2	0.0890692	0.722679	0.284565	0.436993	0.192081	0.190326	0.120799	0	0.265019	0.657676	0.711468	1	0.709084	0.389612
D6RIT3;Q8N1A6	0.933463	1	0.662785	0.49582	0.217389	0.181381	0.115491	0.0918494	0.0898825	0.0396122	0	0	0	0
D6RIY6;Q06265;Q06265-2	0	0.00237669	0.150292	0.240111	0.139115	0.121249	0.14878	0.0477447	0.2625	0.172432	0.263238	0.400327	0.248008	1
D6RJ90;Q9Y6G5	0.0710829	0.030956	0.0670777	0.0355514	0.547828	0.855164	1	0.51466	0.393023	0.182312	0.169322	0	0.0887616	0.256029
D6RJG9;Q9Y5W7;Q9Y5W7-2;Q9Y5W7-3;Q9Y5W7-4	0	0	0.260272	0	0	1	0.537284	0.630656	0.65429	0.288977	0.673298	0.258437	0	0.426657
E1CKY7;O60237;O60237-4;O60237-6	0	0	0	0	0	0	0	0	0	0.665212	1	0	0.529966	0.539771
E2QRG8	0	1	0	0	0	0	0	0	0	0	0	0	0	0
E2QRK7;Q5JTD0;Q5JTD0-2	0	0	0	0	1	0.558044	0.604331	0.832919	0	0	0	0	0	0
E3W980;E3W982;Q8TDG4	0	1	0	0.851991	0.617145	0	0.320008	0	0.312926	0	0.337363	0.0718894	0	0
E5KLJ9;O60313-10;O60313-2;O60313-9	0.0744723	0	0.0294942	0.0360021	0.0649108	0.117072	0.14106	0.180374	0.311734	0.474884	1	0.969987	0.536228	0.435088
E5RFE0;E5RGT8;Q9UQ10	0.698781	1	0.560151	0.438321	0.253123	0.24729	0.171764	0.121563	0.0978472	0.048359	0	0	0	0.0122106
E5RFF8;J3KNU2;Q8IX29;Q8IX29-2	0	0	0	0	0.0680739	0.190048	0.164764	0.152025	0.0839295	0.166613	0.450545	1	0.593739	0.410302
E5RFT4;Q8N4L2	1	0	0	0	0.158014	0.550137	0.513746	0.481718	0.705459	0.595597	0.299683	0	0	0.607872
E5RFV7;O00300
E5RFX7
E5RG15;E5RHB3;Q8NBP0;Q8NBP0-2	0	0.0288105	0	0.0510088	0	0	0.031428	0.097729	0.133395	0.257559	0.293989	0	0	1
E5RG17;G5EA19;H0YBX2;Q6P1N9;U3KQS5	0.657803	1	0.468164	0.49465	0.237569	0.129206	0.194431	0.0746586	0.0352162	0.0346796	0.0120686	0.200396	0.114788	0
E5RG29	0	0	0	0	0	0	0.508979	0.822655	0.945472	0.481682	1	0.964078	0.648154	0.434109
E5RG44;E5RGJ1;E5RIT1;Q629K1	0.0349203	0	0.00880341	0.0221401	0.196348	0.268046	1	0.493128	0.202204	0.344975	0.111222	0.322532	0.224208	0.367001
E5RGB7;E5RGH1;H0YBV9;Q7Z388	0	0	0	0	0	0	0	0	1	0	0	0	0	0
E5RGU4
E5RGZ2;H0YKJ1;Q6NT76;Q6NT76-2;Q6NT76-3;Q6NT76-5	0	0	0	0	0	0	0	0	0.151143	0	0.255252	1	0.309679	0.356059
E5RHC5;Q8N6T3;Q8N6T3-3	1	0.488468	0.34576	0.27722	0.226125	0.225236	0.227999	0.192906	0.2084	0.220634	0	0.0474332	0.0844588	0.0664988
E5RHG8;Q15369	0.702228	1	0.713439	0.599188	0.329071	0.230429	0.190913	0.0635207	0.134447	0.0862613	0.0492573	0	0.0656183	0.0305392
E5RHW4;O94905	0.0394542	0.025332	0	0.015412	0.139508	0.428695	0.973204	1	0.690185	0.396252	0.4789	0.423761	0.341212	0.352189
E5RIA2;E7EUF1;Q13822;Q13822-2;Q13822-3
E5RIA9;Q9UJ68;Q9UJ68-5	0.688442	1	0.619346	0.370047	0.188201	0.0859964	0.120786	0.0641441	0	0.0487603	0.241088	0.307736	0.262846	0.216036
E5RIH5;Q6NXR4	0	0	1	0.783118	0.504261	0.317352	0.287778	0.28399	0.307393	0	0	0	0	0
E5RIK6	0	0	0	0	0	0	1	0.626299	0	0	0	0	0	0
E5RIT6;Q9UNX3	0	0	0	0.0889515	0.114812	0.191364	0.17407	0.372475	0.348516	0.486718	0.752784	1	0.613878	0.349414
E5RIW3;E5RJD8;O75347	0.670675	1	0.514981	0.475027	0.356832	0.216246	0.192763	0.117368	0.0799265	0.0646621	0.0262446	0	0.0243397	0.00266422
E5RIW9;P28328	0	0	0	0	0	0	0	0	0	0.534472	0	1	0	0
E5RJ29;Q9NYI0;Q9NYI0-2	0.301194	0	0	0	0	0	0	0.439683	0.746838	0.894269	0.847833	0.538406	0.446233	1
E5RJ36;H0YAX6;Q14CS0	0	0	1	0	0	0	0	0	0	0	0	0	0	0
E5RJF8;E5RK82;O15182	0.290623	0	0	0	0	0	0	0.201218	0	0.0996978	0.0872199	0	0	1
E5RJN7;E7EPX0;E7EVI1;E7EVJ4;Q9NUL3;Q9NUL3-2;Q9NUL3-3;Q9NUL3-6;Q9NUL3-7;Q9NUL3-8	0	0	0	0.100073	0.290887	0.391087	0.722972	0.630893	0.657989	0.61841	0.69904	0.892222	1	0.530994
E5RK69	1	0.817625	0.654427	0.568975	0.236251	0.172152	0.279933	0.331127	0.320647	0.288747	0.28353	0.386783	0	0
E7EM64;Q7L5N1	0.529429	1	0.694427	0.449481	0.369925	0.265287	0.399756	0.228959	0.33081	0.0870601	0	0	0.437013	0
E7EM72;E7EWQ4;O75912	0	1	0	0.814011	0	0.283164	0	0	0	0	0	0	0	0
E7EMB1;Q9UH65	0.648464	1	0.537542	0.455782	0.322706	0.265839	0.254171	0.212882	0.253915	0.225819	0.0862526	0	0.192999	0.219654
E7EMC7;Q13501	0	0	0.354417	0.305162	0.359931	0.370867	0.395682	0.427748	0.882898	0.663629	1	0.283256	0.602861	0.666061
E7EMD6;O43572	0	1	0	0	0	0	0.323541	0	0	0	0	0	0	0
E7EMK3;J3QLD9;Q14254	0.265259	0	0.0377592	0	0.0745591	0.143314	0.247847	0.425157	0.712694	0.494963	0.796112	0.744823	0.322546	1
E7EMS2;G3V3D1;G3V3E8;J3KMY5;P61916	0	0	0	0	0	0	0.361366	1	0.498716	0	0	0	0	0
E7EMT5;P04798	0	0	0	0	0.387949	0.699379	1	0.957545	0.723386	0.466665	0.445024	0.395663	0.307093	0.239151
E7EMT6;E7ENY2;E7EQA9;E7EV32;E7EVA2;E7EW82;H7C3L4;Q92844	0.498549	0.1657	0.747962	1	0.740343	0.483846	0.617145	0	0	0	0	0	0	0
E7EMZ9;E9PBC6;O95359;O95359-3	0.281094	0.449284	0.256016	0.248123	0.306689	0.231293	0.212875	0.135649	0.0380923	0.169535	0.0657203	1	0.16401	0
E7EN01;Q16602	0	0	0	0	0	0	1	0	0	0	0	0	0	0
E7EN24;Q12864	0	0	0	0	0	0	0	0	1	0	0	0	0	0
E7EN73;Q8IZA0;Q8IZA0-2	0	0	0	0	0.48467	0.947201	0.921919	0.878376	1	0.597125	0.388412	0.414159	0	0.674339
E7EN91;Q9BWF2	0.579203	1	0.832887	0.647328	0.298609	0.645821	0	0.207368	0	0	0	0	0	0
E7END6;P04070;P04070-2	0.188574	0.11408	0	0	0.190786	0.533142	0.624674	0.652193	0.569568	0.464401	0.770508	1	0.608123	0.541036
E7ENL6;P12111;P12111-2;P12111-4	0.0122063	0.012567	0.00737131	0.00343128	0.00121345	0	0.00486556	0.00210312	0.0135877	0.0314361	0.0448027	0.105573	0.0851204	1
E7ENT5;E7EV45;Q9ULF5
E7ENV7	0.292734	0	0.210828	0.262356	0.238481	0.23545	0.560795	0.53992	0.689355	0.546424	0.58823	0.437741	0.513612	1
E7ENY0;E7EV99;P35611;P35611-2;P35611-3;P35611-6	0.347761	0.418439	0.322805	0.179201	0.0507805	0.033539	0	0.144754	0.330724	0.289896	0.504548	0.362486	0.454947	1
E7EP17;Q9NYC9;Q9NYC9-2	0	1	0.53036	0.104632	0.117879	0.127947	0.268422	0.107081	0.427059	0.229367	0	0.330418	0.298858	0
E7EP72;Q9UFG5	0.0862063	0	0.103356	0.183857	0.365707	0.881558	1	0.736264	0.561381	0.556814	0.374134	0.291349	0.310232	0.352072
E7EPB3;P50914	0.0590237	0	0.0883248	0.217864	0.167546	0.317819	0.324908	0.455827	0.567562	0.530844	0.947057	1	0.707883	0.703708
E7EPG1;Q13201	0	0	0	0	0	0	0	0	0	0	0	0	0	1
E7EPI0;Q9P2D0	0	0	0	0	0.165718	0.198059	0.546385	0.906028	1	0.976931	0.877426	0.619348	0.80894	0.498699
E7EPK1;E7ES33;Q16181;Q16181-2	0.0467816	0.49511	0.0881809	0.130983	0.0761909	0	0.0315477	0.0732229	0.148508	0.0476244	0.332203	0.248609	1	0.389267
E7EPN9;Q9Y520;Q9Y520-4;Q9Y520-5;Q9Y520-6;Q9Y520-7	0.526428	1	0.904854	0.533365	0.252162	0.25283	0.152081	0	0.058528	0.0611099	0.345157	0.632935	0.515543	0.108338
E7EPS8;P28827;P28827-2	0.895711	1	0.731948	0.638735	0	0.493941	0	0.580512	0.593107	0.668653	0	0	0.295812	0.827482
E7EPT4;P19404	0.0164999	0.0100222	0.000957475	0.00280128	0	0.0104086	0.0256304	0.0486566	0.10877	0.368978	0.635301	1	0.56272	0.661311
E7EQB2;E7ER44;P02788;P02788-2	0	0	0	0	0	0.0164099	0.0512459	0.0997799	0.338363	0.449555	1	0.435596	0.230845	0.312066
E7EQH1;E9PMB7;E9PR55;Q8NFJ9;Q8NFJ9-2;Q8NFJ9-3	0	0	0	0	0	0	0	0	0	0	0	0	1	0
E7EQM8;J3QRM6;J3QS93;P43146
E7EQQ5;Q9C035;Q9C035-2;Q9C035-3;Q9C035-4;Q9C035-5;Q9C035-6	0.435707	0.762944	1	0.804524	0.201054	0.282065	0.120966	0	0.159327	0.0999148	0	0	0	0
E7EQT3;Q9BY07-5	0.374257	1	0.52041	0.29316	0.217568	0.0951443	0.0848999	0.0751292	0.0638924	0	0	0	0.0752481	0.248656
E7EQT4;Q9UKV3;S4R3H4	0.318603	0.255025	0.205065	0.108413	0.131342	0.0913011	0.0698868	0.0517466	0	0.0530081	0.133198	0.118182	0.64525	1
E7EQU1;E7ES08;E9PES6;O15347	0.263174	0.164279	0.0589331	0.0709022	0	0.0544821	0.0722833	0.165483	0.200952	0.108274	0.0849995	0.326623	0.283344	1
E7EQY1;Q96C01	0.159287	0.226146	0.323482	0.162661	0.275218	0	0.28919	0.119916	0.190829	0.31287	0.842691	1	0.554409	0.228735
E7ER45;O43451	0.310774	0	0	0	0.154271	0.360792	0.223154	1	0.84372	0.959628	0.962388	0.824403	0.791631	0
E7ER77;Q7Z2K6	0.07968	0.229611	0.0822795	0	0.188796	0.403547	0.47493	0.637873	0.875088	0.658122	0.839974	1	0.60937	0.738081
E7ERI8;E7EW49;O75122-3	0.598015	1	0.423503	0.570825	0.327545	0.361806	0.303311	0.108369	0.203001	0.202604	0	0.203304	0.246336	0.672442
E7ERS3;Q86VM9	0	0	0	0.13562	0.159628	0.205822	0.130225	0.135171	0.0451906	0.250601	0	0.237232	1	0.738178
E7ES84;P50748
E7ES96;P49768;P49768-2	1	0	0	0.465796	0.447378	0.0332087	0.295432	0.70557	0.531955	0.698939	0.879449	0.163809	0.109027	0.9717
E7ESA6;H0YBP1;Q05397;Q05397-7	0.720258	1	0.862154	0.547469	0.122147	0.158482	0	0.0827792	0.0805521	0.154005	0.0644792	0.187446	0.0389453	0.481688
E7ESA7;P29474	0	0	0	0	0	0.197123	0.439446	0.598975	1	0.615937	0	0	0	0.915483
E7ESC6;Q9UIA9	0.687259	1	0.902176	0.512915	0.300186	0.227438	0.199922	0.111156	0.106706	0.0370647	0	0.00664536	0.029484	0.0157455
E7ESD2;Q641Q2;Q641Q2-2	0.0858911	0.15198	0.236307	0.341555	0.609324	1	0.898954	0.4626	0.506116	0.210815	0.012104	0	0.346789	0.231789
E7ESF6;Q13094	0.741822	0.569656	0.307585	0.69943	0	0.330623	0.147058	0.231204	0.347964	0	0	0	0	1
E7ESK6;E9PBI9;P34741	0.289932	0	0	0	0.380216	0.568116	0.728051	0.740325	0.44488	0.886116	0.486011	0.41842	0.305864	1
E7ESL0;J3KQY1;Q9NWU5;Q9NWU5-2;Q9NWU5-3	0	0	0.0729112	0.084438	0.0634326	0.0998387	0.125308	0.11188	0.15747	0.23615	0.700992	1	0.607318	0.683265
E7ESP4;P17301
E7ESS3;K7EKW3;Q71RG4;Q71RG4-2	0	0	0	0	0.235952	0.71036	0.813878	0.971809	1	0.543846	0.352298	0.248707	0.239309	0.309499
E7ESU7	1	0	0	0	0	0	0	0	0	0	0	0	0	0
E7ESY4;H0Y4T7;Q13330;Q13330-3
E7ET49;Q8NCG7;Q8NCG7-2;Q8NCG7-4	0	0	0	1	0.560981	0.425288	0.504732	0.700263	0.502069	0.433878	0	0	0	0.782262
E7ET87;E7EVI4;O75410;O75410-10;O75410-2;O75410-3;O75410-4;O75410-5;O75410-6;O75410-7;O75410-9	1	0.863629	0.632561	0.495619	0.563404	0.460722	0.499385	0.359372	0.285636	0.415309	0.147676	0	0.586787	0.334987
E7ETB3	0.349482	0.594683	1	0.892744	0.456321	0.36661	0.301838	0.272178	0.184312	0.107516	0	0.00285066	0.0643641	0.0197271
E7ETH0;G3XAM2;P05156	0	0.07761	0.0834721	0.021616	0.159673	0.263704	0.965452	0.629288	1	0.546696	0.52454	0.473943	0.299004	0.355338
E7ETM6;Q8N2H4	0	0	0	0	0	1	0.66522	0.203911	0	0	0	0	0	0
E7ETU5;F6Y5H0;P29558;P29558-2	0	0	0	1	0	0	0	0	0.978785	0	0	0	0	0
E7ETU7;H0Y9G6;P09001	0	0	0.0612376	0.0714737	0.0690585	0.062798	0	0.0564235	0.106961	0.323596	0.659259	1	0.597843	0.702185
E7ETY4;E9PC69;Q7KZI7;Q7KZI7-10;Q7KZI7-11;Q7KZI7-12;Q7KZI7-13;Q7KZI7-14;Q7KZI7-15;Q7KZI7-16;Q7KZI7-2;Q7KZI7-3;Q7KZI7-4;Q7KZI7-5;Q7KZI7-6;Q7KZI7-7;Q7KZI7-8;Q7KZI7-9	0.651261	1	0.699676	0.526025	0	0.122471	0.134719	0.244607	0.389461	0.334152	0.162413	0.129751	0.178528	0.399325
E7ETZ4;Q9Y6E2	0	0.122759	0.347711	0.364443	0.77789	0.817723	0.923899	0.79115	1	0.779419	0.718552	0.675831	0.883221	0.67133
E7EU05;E9PLT1;P16671;P16671-3	0.106413	0	0	0.0275147	0.0793753	0.163824	0.320444	0.706855	1	0.753316	0.757669	0.578176	0.265911	0.909239
E7EU13;Q96P48;Q96P48-1;Q96P48-2;Q96P48-3;Q96P48-4	0.979596	1	0.683505	0.56441	0.397165	0.358395	0.233139	0.350121	0.298424	0.262093	0.0992706	0	0.216802	0.16653
E7EU14	0.686843	1	0.719922	0.671964	0.335285	0.238806	0.327373	0.268308	0.239937	0.132898	0	0	0.0173128	0
E7EUH7;Q96PZ0;Q96PZ0-2	0.791362	1	0.585603	0.474429	0.2827	0.276409	0.165557	0.153	0	0	0	0	0	0
E7EUJ7;Q8TC20;Q8TC20-2;Q8TC20-3;Q8TC20-5	0	0	0	0	0	0	0	0	0	0	0	0	0	1
E7EUU4;Q04637-8	0	0.321712	0.485169	0.786443	1	0.974182	0.960366	0.941373	0.762176	0.858914	0.343768	0.422252	0.615702	0.0676341
E7EUW0;H0YA74;Q9C0I3;Q9C0I3-2	0	0	0	0	0.379199	1	0	0.502134	0	0	0	0	0	0
E7EV01;O15484	0.134031	0	0	0	0.0471957	0.098812	0.172014	0.333547	0.633536	0.61123	0.827589	0.530406	0.279224	1
E7EV71;Q14766;Q14766-2;Q14766-4;Q14766-5	0	0	0	0	0	0	0	0	0	0	0	0.358733	0	1
E7EVA0	0.650832	1	0.331246	0.33325	0.262265	0.217263	0.223104	0.180467	0.146721	0.0799751	0.00588614	0	0.16709	0.277121
E7EVC7;Q676U5;Q676U5-2	0.70806	1	0.68844	0.679164	0.293008	0.308803	0.171356	0.193169	0.132124	0.108832	0.0211266	0	0.127419	0.00650698
E7EVE9;P18074	0.247027	0	0.272094	0	0.496267	0.355492	0.15206	0.459644	0.190643	0.271633	0.491573	0.356527	0.64697	1
E7EVH7;F8W6L3;G3V2E7;G3V3H3;G3V5R9;Q07866;Q07866-10;Q07866-2;Q07866-3;Q07866-4;Q07866-5;Q07866-6;Q07866-7;Q07866-8;Q07866-9	0.485377	1	0.540561	0.588712	0.313932	0.272266	0.259369	0.237244	0.206911	0.246568	0	0	0.147271	0.220051
E7EVJ5;Q96F07;Q96F07-2	0	0	0	0	0.427151	0	1	0	0	0	0	0	0	0
E7EVM0;H0YBR7;H0YBY1;P01266;P01266-2
E7EVQ6;Q14534	0.168289	0	0.0891539	0.142017	0.229576	0.528684	0.50342	0.734533	1	0.710655	0.523851	0.405889	0.290745	0.35111
E7EVX8;Q8WWY3	0.153548	0.440856	0.229026	0.280909	0.216806	0.178404	0.118156	0.130075	0.0803347	0.0584882	0	0.199189	0.200315	1
E7EVZ1;Q86UP3;Q86UP3-2;Q86UP3-4;Q86UP3-5	0	0	0	0	0	0	0	1	0	0	0	0	0	0
E7EW05;Q9NVU7;Q9NVU7-2
E7EWD3;O75077;O75077-2	0	0	0	0.133781	0.206787	0.312082	0.390873	1	0.926488	0.950822	0.784998	0.847573	0.429217	0.895308
E7EWM1;Q15596	1	0	0.904849	0	0	0	0	0	0	0	0	0	0	0
E7EWP0;H0Y886;O43674;O43674-2	0	0	0	0	0	0	0	0	0	0	0.774296	1	0	0
E7EWR4;P33240;P33240-2	0.370224	0.189825	0.155559	0.201986	0.17239	0.256811	0.132118	0.0793846	0	0.109557	0.00772855	0.532144	0.543314	1
E7EWW0;Q7Z3J2	0	0.267169	0.250319	0.48636	1	0.824955	0.641269	0.464167	0.85914	0.715274	0.48082	0.146094	0.315654	0.0502043
E7EWX8
E7EX17;P23588	0.409043	0.441054	0.80383	0.916142	1	0.648402	0.488691	0.517692	0.342496	0.41236	0.0851276	0.0544988	0.139086	0
E7EX40;Q6WKZ4;Q6WKZ4-2;Q6WKZ4-3	0.594756	1	0.521806	0.502776	0.429018	0.197979	0.414236	0.314775	0	0	0	0	0	0.210543
E7EX44;Q05682-2;Q05682-3;Q05682-6	0.310948	0.320944	0.132278	0.0841305	0.0684896	0.00476217	0	0.100354	0.221984	0.461623	0.480691	0.445113	0.448265	1
E7EX70;Q9GZS1	0	0	0	0	0	0	0	0	0	0	0	0	0	1
E7EX90;Q14203;Q14203-3;Q14203-4;Q14203-6	0.184424	0.247239	1	0.923035	0.593189	0.549318	0.414039	0.303012	0.285533	0.19591	0.0733796	0.0848065	0.125622	0
E9PAM5
E9PAV3;E9PAV3-2;F8VZJ2;F8W0W4;H0YHX9;Q13765	0.234059	0.841107	0.692783	1	0.641085	0.825986	0.977176	0.740005	0.737721	0.118576	0.279321	0.0519302	0.441394	0
E9PB18;Q6UXG2;Q6UXG2-2;Q6UXG2-3;Q6UXG2-4	0.181529	1	0.440928	0.49121	0	0.089889	0.108799	0.43297	0	0	0	0	0	0
E9PB51;Q9BWF3	0.0588909	0	0.0677143	0.0923953	0.292243	0.321532	0.372719	0.44527	0.485607	0.594661	0.487732	0.516586	0.582784	1
E9PB61;Q86V81	0.0468003	0	0.0428955	0.0997504	0.162104	0.227797	0.169596	0.218657	0.218258	0.161114	0.24879	0.271242	0.407773	1
E9PB90;P52789	0.876636	1	0.34484	0.326095	0	0	0	0	0.345419	0	0	0	0	0
E9PBC1;F6PQP6;I3L2B2;I3L2H1;I3L356;O95208;O95208-2;O95208-3;O95208-5	0	0	0	0	0	0	0.824451	0.544161	0.506605	1	0.76992	0	0.36732	0.43139
E9PBF9;H7C2N6;P15336	0.381656	1	0	0.299264	0	0	0	0	0	0	0	0	0	0
E9PBP6	0	0	0	0	0	0	0	0	1	0.892315	0	0	0	0.627002
E9PBZ2;P15428;P15428-2;P15428-4	0.658933	1	0.683475	0.385874	0.229762	0.170508	0.109871	0.0838741	0.064868	0.0457129	0.00916257	0	0.00918471	0.00548585
E9PC53;H7C3N0;Q8TBK2;Q8TBK2-2	0	1	0	0	0.260686	0	0	0.106274	0	0	0	0	0	0
E9PC61;G4U4J3;Q8NDF8;Q8NDF8-2;Q8NDF8-3;Q8NDF8-5	0.0708976	0.393283	0	0	0	0.199661	0.275972	0	0	0	0	0	0	1
E9PC66;P17029	0	0	0	0	0	0	0	0	0	0	0	0	0	1
E9PC87;O94876;O94876-2	0	0	0	0	0.238701	0.467789	0.574295	0.485811	0.6094	0.473032	1	0.439214	0.384333	0.369587
E9PC90;H0YA62;P14635;P14635-2	0	0	0	0	0.0857011	0	0.773027	0.191293	1	0	0	0	0	0.658721
E9PCD7;H0YA68;Q9Y2E5;Q9Y2E5-2	0.232312	0.207686	0.215711	0	0.068691	0.240518	0.294015	0.221495	0.423957	0.477618	0.456708	0.743529	0.551163	1
E9PCJ7;G3V336;Q8N806	1	0	0	0	0	0	0	0	0	0	0	0	0	0
E9PCN2;Q02153;Q02153-2	0.594702	1	0.893053	0.633396	0.330647	0.299514	0.257979	0.267185	0.244689	0.187357	0.150913	0.126706	0	0.228462
E9PCP0;F5H0S8;F5H100;F5H8J8;P16520;P16520-2	0.416531	0	0	0	0	0	0	1	0	0	0	0.432452	0	0
E9PCQ7;F8WD67;F8WD87;O43709;O43709-2;O43709-3
E9PCW1;G5E9T8;K7EJC8;O95249	0.405663	0	0.102005	0.253217	0.544304	1	0.912463	0.82687	0.649524	0.503841	0.208497	0.231643	0.18126	0.403819
E9PCX2;P15121	0.80449	1	0.581847	0.324398	0.167933	0.142585	0.0866084	0.0637503	0.0709097	0.0226272	0.0173204	0	0.0126383	0.0145079
E9PCX5	0	0.0540542	0	0	0.266634	0.287392	0	1	0	0	0.183297	0	0.640782	0
E9PD50;Q92540;Q92540-2;Q92540-4	0	1	0.709883	0.547444	0.364932	0.555048	0	0.37064	0.334537	0.59826	0.222726	0.295011	0.422058	0.127493
E9PD53;Q9NTJ3;Q9NTJ3-2	0	0	0	0	0	0	0	0	0	0	1	0	0	0
E9PD68;Q14194;Q14194-2	0	0	0.653006	1	0	0	0	0	0	0	0	0	0	0
E9PD72
E9PDE8	0	0	1	0	0	0	0	0.621044	0	0	0	0	0	0
E9PDN4	0	1	0	0	0	0	0	0	0	0	0	0	0	0
E9PEF1;O00408;O00408-3;O00408-4	0.788415	1	0.359117	0.529742	0.171485	0.332472	0.186533	0.113139	0.183409	0.0741076	0.247437	0.0857434	0	0.136381
E9PEJ6;H0Y547;P98196	0	0	0	0	0	0.234242	0.304906	0.481647	0.607081	0.457911	0.6768	0.494694	0	1
E9PEP6;O14786	0	0	0	0.0604394	0.0878588	0.488231	0.627755	0.715665	0.894062	0.851931	0.817727	0.782846	0.356552	1
E9PEQ6	0.370365	0	0	0.415459	0.295959	1	0.729391	0	0	0	0	0	0.662102	0.83303
E9PER6;O15530;O15530-2;O15530-3	0.645188	1	0.597453	0.425122	0.261352	0.0883425	0.131359	0.133438	0.0974757	0.0205179	0.168347	0	0.180275	0.263376
E9PEW8	1	0.321522	0.268846	0.195647	0.138567	0.0433073	0.0962248	0.0114969	0.0406079	0	0.121342	0.139206	0.0760357	0.858352
E9PEX6;P09622	0.130024	0.108329	0.168138	0.0429401	0.0438075	0.0294179	0.0264724	0	0.0227391	0.0944864	0.689084	1	0.704785	0.519612
E9PF10;O75694	0.0695097	0	0.0508006	0.0413583	0.0326356	0.046475	0.00659422	0.00489494	0.0179678	0.0860067	0.066371	0.127731	0.0802315	1
E9PF16;Q96CM8;Q96CM8-2;Q96CM8-3	0.109596	0.188274	0.0803506	0.0446568	0.0522755	0.0518815	0	0	0.0538309	0.143702	0.633452	1	0.60923	0.529494
E9PF19;Q96E41;Q9Y4P3	0	0	0	0	0.0716131	0.0527381	0.112982	0.191258	0.233322	0.435819	0.863089	1	0.745545	0.522362
E9PFF8	0	0	0	0	0	0	1	0	0	0	0	0	0	0
E9PFK5;P78316;P78316-2	0	0	0.0723073	0	0	0	0	0	0	0	0	0	0	1
E9PFK9;Q9UJ41;Q9UJ41-3;Q9UJ41-4	0.308287	1	0.29344	0.198108	0.131892	0.18018	0.225738	0.139863	0.0400676	0.0513332	0	0	0	0
E9PFR3;Q14738;Q14738-2;Q14738-3	0.540398	1	0.520835	0.568429	0.331268	0.316216	0.337033	0.214097	0.154591	0.0845652	0.189025	0	0	0
E9PFR9;J3KQJ8;Q96N96;Q96N96-2;Q96N96-3;Q96N96-5;Q96N96-6	0.012067	0.00329866	0	0	0	0	0	0	0.195358	0.274233	0.515988	1	0.414443	0.474706
E9PG19;O94868;O94868-2	0.398933	0.732441	1	0.354081	0.310921	0.440508	0.424088	0	0.239297	0	0	0	0	0.129496
E9PG32;Q6ZR08	0.100301	1	0.0457749	0.0589423	0.0966522	0.000692884	0.0452708	0.076574	0	0.0471871	0.0223772	0.262893	0.301988	0.0365018
E9PG40;P05067;P05067-11;P05067-7;P05067-8;P05067-9	0.174599	0	0	0	0.291098	0.514731	0.89393	0.707228	1	0.63842	0	0.16729	0.152204	0.482376
E9PG71;P54764;P54764-2	0	0	0	0	0	0	0	0	0	1	0.61623	0.428445	0	0
E9PG73;Q13427	0.194335	0.206581	0.00676575	0.0455927	0	0.0093951	0.0226885	0.0341634	0.0279886	0.0694951	0.119213	0.20145	0.45174	1
E9PGC0;P20936;P20936-2;P20936-4	0.825315	1	0.918833	0.61065	0.444534	0.264397	0.249138	0	0	0	0	0	0	0
E9PGM7;O94988;O94988-1;O94988-3;O94988-5;O94988-6	1	0.547091	0.487147	0.495818	0.550962	0.277029	0.452379	0.266708	0.314085	0.412911	0	0	0.311821	0.424088
E9PGQ0;Q96H78	0	0	0	0	0	0.0234667	0.00761632	0.0632028	0.203271	0.211295	1	0.911339	0.462202	0.251854
E9PGT3;Q15418;Q15418-2;Q15418-4	0.681761	1	0.693802	0.565342	0.273401	0.208928	0.132259	0.0944181	0.127198	0.0643558	0.0905757	0.0335303	0	0.0305042
E9PGT6;Q99627	0.451552	0.629086	0.884295	1	0.498581	0.281485	0.188713	0.255857	0.156407	0.130936	0.0151894	0	0.0425375	0
E9PHI4;O94901-9	0	0	0.430466	0	0	0	0	0.278261	0.11105	0	0.31854	0.28197	0	1
E9PHR9;Q9NRQ2;Q9NRQ2-2	0	0	0	0	0	0	0	0	0	0	0	0	0	1
E9PHT3;Q8IYS0;Q8IYS0-2	0.696391	0	0	0	0.799507	0	1	0.753531	0.87099	0.712138	0	0	0	0
E9PHV5;P28290	0.146436	0.0668331	0.0737012	0.0250431	0	0.0263843	0.0125476	0.108605	0.248988	0.546104	0.474759	0.54493	0.317148	1
E9PHX8;H7C3L9;Q12866	0	0	0	0	0	0	0	1	0.573435	0.774098	0	0	0	0.697694
E9PHY5;O43491-4	0.32918	0.173121	0.0860786	0	0.0220128	0.00994995	0.0452618	0.408481	0.504785	0.851942	1	0.86946	0.662115	0.988837
E9PHY8;Q8NDA8	0	0.535108	0	0.87011	0.561856	1	0.434567	0.303511	0.422294	0.338087	0	0.196422	0	0
E9PI41	0.258516	0.165684	0.628255	0.283111	0.237228	0.140461	0.186265	0	0.0573778	0.0620475	0.0620008	0.0763259	0.20197	1
E9PI92
E9PIC5;Q8N4M1-4;Q8N4M1-5;Q8N4M1-6	0.175878	0.284379	0.730358	0.448684	0.227889	0	0.659347	0.402205	0.447773	0.344375	0.877754	1	0.737169	0.655151
E9PIE3;Q969G5	0	0	0	0	0	0	0	0	1	0.55574	0	0	0	0
E9PIF4;Q99519	0.109678	0.0999007	0.119771	0	0.03315	0.00111586	0.137935	0.219915	0.451024	0.716322	1	0.980898	0.734385	0.847031
E9PIG5;O00212
E9PIH9;F8WA39;H0YDX3;Q13613;Q13613-2;Q8NEC6	0.400724	0	0.230902	0.205773	0.189356	0.27721	0.330244	0.369343	0.731198	0.573307	0.541203	0.650163	0.46706	1
E9PIZ1	0	1	0	0	0	0	0	0	0	0	0	0	0	0
E9PIZ2;H0YDB8;Q8N3Y3	0	0	0	0	0	0	0	0	1	0	0	0	0	0
E9PJ55;Q9NUJ3	0.760522	1	0.931265	0.532375	0.386864	0.257357	0.238305	0	0.217947	0	0	0	0	0
E9PJE4;Q9GZQ3	0	0	0	0	0.452065	1	0.740955	0.864528	0	0	0	0	0	0
E9PJI1;Q92993;Q92993-2;Q92993-3;Q92993-4	0	0	0	0	0	0	0	0	0	0	0	0	0	1
E9PJJ5;E9PK99;E9PMS5;E9PRT1;Q4G0X4	0.426679	1	0.942877	0.731435	0.450719	0.29298	0.268631	0.223917	0.145075	0.107645	0	0.0850136	0	0.0498102
E9PJN9	0	0	0	0.106182	0.225181	0.202941	0.227944	0.37983	0.47239	0.361158	0.612715	1	0.883475	0.134807
E9PJQ3;Q8N413;Q8N413-4	0	0	0	0	0	0	0	0.0382679	0.101699	0.414348	0.871816	1	0.399076	0.383342
E9PJW8;E9PQA6;Q96EY5;Q96EY5-2;Q96EY5-3
E9PK25;G3V1A4;P23528	0.966895	1	0.679216	0.880422	0.565851	0.319978	0.314003	0.205044	0.170758	0.205337	0.0720878	0.0387971	0.0492817	0
E9PK67;E9PNI7;Q53GL7	0.837163	1	0.597071	0.451011	0.26199	0.214444	0.226601	0.201821	0.0468948	0.427926	0	0	0	0
E9PK91;Q9NYF8;Q9NYF8-2;Q9NYF8-3	0.0461732	0.182034	0.0379239	0.0229877	0.0598744	0	0.00661683	0.0207321	0.0336497	0.0563334	0.00321369	0.13291	0.753426	1
E9PKA8;E9PQL5;E9PSC8;Q6ZUT1;Q6ZUT1-2;Q6ZUT1-3	0	0	0	0	1	0	0	0	0	0	0	0	0.855521	0
E9PKC0;Q6IQ23;Q6IQ23-2	0.174254	0	0	0.0677289	0.0621849	0.0693016	0.130109	0.153776	0.250202	0.468382	0.434992	0.394488	0.377233	1
E9PKE9;G3V148;Q9H920;Q9H920-2
E9PKF6;H7BXH2;Q5H9R7;Q5H9R7-2;Q5H9R7-5;Q5H9R7-6	0.745749	1	0.788566	0.631104	0.280094	0.309337	0.222132	0.184242	0.257313	0.198439	0.113183	0	0.0339398	0.184033
E9PKG1;Q99873;Q99873-2;Q99873-3	0.727772	1	0.893412	0.721853	0.521115	0.356994	0.391571	0.340519	0.302246	0.32651	0	0.156281	0.474752	0.0521803
E9PKN0;E9PQ01;O94913	0	0	0	0	0.784416	0.792453	0.781955	0	0.807277	1	0	0	0	0
E9PKP7;P17480-2	0	0	0	0	0	0	0	0	0	0	0	0	1	0
E9PKP8;E9PS00;H0YCN1;H0YED5;Q9Y5Q0	0	0	0	0	0	0.616861	0.929077	0.501556	1	0	0	0	0	0
E9PKS9;E9PQE8;Q9Y296;Q9Y296-2	1	0.895801	0.646133	0.701132	0.650664	0.670301	0.161776	0.224067	0.16514	0.129275	0.0546037	0	0.210418	0.315336
E9PKT4;Q8N131;Q8N131-2	0	0	0.238966	0.199008	0.697168	1	0.815119	0.590413	0.173107	0.515629	0.0820928	0	0.162022	0.268515
E9PKT9;O96033	0.64433	1	0.545246	0.390263	0.222028	0.120224	0.17769	0.118857	0	0.114836	0	0	0	0
E9PL17;Q92989;Q92989-2	0.961446	0.710572	1	0.906333	0.680578	0.436023	0.50953	0.316909	0.280173	0.397409	0.229694	0	0	0.815411
E9PL57	0.867737	1	0.432025	0.388676	0.233641	0.162994	0.182665	0.0787475	0.0482157	0.093546	0	0	0	0.0306786
E9PLD0;Q9H0U4	1	0.996899	0.860185	0.738512	0.0834916	0.397288	0.60738	0.534509	0.318692	0.19471	0	0.120472	0	0
E9PLI6;E9PNH5;E9PS76;Q8N9N8	0	1	0	0.343039	0	0	0.247627	0	0	0	0	0	0	0
E9PLK3;P55786	0.700454	1	0.70137	0.398554	0.196304	0.185896	0.116575	0.0718026	0.0600285	0.0348769	0.011982	0.0149897	0	0.00788153
E9PLN8;F8W9H0;I3L3B4;Q9BQB6;Q9BQB6-2;Q9BQB6-3	0	0	0	0	0	0	0.477281	0	1	0	0	0	0	0
E9PLP8;Q12996	0	0	0.134561	0.17915	0.213495	0.232409	0.161786	0.122129	0.145621	0.0891011	0.0473594	0.251449	0.40088	1
E9PLY5	0.447198	1	0.780893	0.497525	0.314139	0.206879	0.183264	0.183122	0.279942	0	0.156515	0	0.18753	0
E9PM19;P29597	0	0	0	0	0	0	0	0.114842	0.213541	1	0	0	0	0
E9PM62;Q5T9L3;Q5T9L3-2	0	0	0	0	0	0.158108	0.724743	0.653686	0.3599	0.406768	0.248762	1	0.247099	0.680487
E9PM75;Q9NTG7	0.0557268	0.0940081	0.0457703	0.0274927	0.0271219	0.00110634	0.0195019	0	0.0205234	0.288478	0.757851	1	0.5701	0.650458
E9PM90;Q9UK41;Q9UK41-2	1	0.912541	0.538093	0.636467	0.434484	0.448797	0.314043	0.452998	0.314094	0.145897	0	0	0.122835	0
E9PMB9;Q16798	0	0	0	0	0	0	0	0	0	0	0.152627	0	0	1
E9PMG5
E9PMI6;J3KN38;P54105	0.505393	1	0.534836	0.906808	0.571154	0.28917	0.399805	0.318665	0.149814	0	0	0	0	0
E9PMJ1;E9PS06;Q15771	0.175722	0	0	0	0	0.698804	0	1	0.703585	0	0.441771	0	0	0.614809
E9PMJ5	0.00421229	0	0.0350124	0.0779091	0.0558639	0.0530441	0.0471006	0.0484364	0.0882098	0.193789	0.671315	1	0.614926	0.685137
E9PMQ6;Q00613;Q00613-2	0	0	0	0	0	1	0	0	0	0	0	0	0	0
E9PMR4;K4DIA7;P48509	0	0	0	0	0	0.047897	0.147019	0.385299	0.773815	0.577783	0.576192	0.465649	0.187461	1
E9PMS6	0.150171	0.105972	0.035889	0	0.0388485	0.0283801	0.0277125	0.144107	0.218473	0.513695	0.451488	0.386919	0.689821	1
E9PN76;Q8ND24;Q8ND24-2	0.730675	0.408331	0.560058	0.582496	0.420566	0.355251	0.339972	0.326343	0.425774	1	0	0	0.561868	0.335108
E9PN78;Q4KMG0;Q4KMG0-2	0	0	1	0	0.706834	0	0	0.690826	0	0	0.411744	0	0	0
E9PN89	0	1	0	0	0	0.0972503	0.163396	0.304844	0	0	0	0	0	0
E9PNE5;Q9H1C4	0	0	0	0	0	0	0	0.123136	1	0	0	0	0.872144	0
E9PNL8;Q13574;Q13574-1;Q13574-3;Q13574-4;Q13574-5;Q13574-6;Q13574-7	0.291426	0.234556	0	0.128597	0.0605835	0.000723932	0.135424	0.305791	0.520604	0.619528	0.186026	0.899751	0.097299	1
E9PNP3;E9PR47;Q9H7C9	0.767586	1	0.519466	0.367948	0.316817	0.16382	0.159325	0.0814452	0.0536337	0.0437766	0	0	0	0
E9PPF6	0	0	0	0	0	0	0	0	0	1	0	0	0.15221	0
E9PPQ1;J3KNE7;Q16890;Q16890-5	1	0.484912	0.299594	0.383521	0.286489	0.250914	0.191888	0.211949	0.208315	0.101828	0.107685	0	0	0
E9PPZ9;O43292;O43292-2	0	0	0	0	0	0.339983	0.297091	0.877827	1	0.426395	0.772285	0.926865	0.537567	0.361777
E9PQ59;Q6P4R8;Q6P4R8-2;Q6P4R8-3	0	0	0	0	0	0	0	0	0	0	0	0	0	1
E9PQ73;Q8TDW7;Q8TDW7-1	0.800196	0.661425	1	0.97314	0.742826	0.486058	0.431546	0.177938	0.154791	0.180313	0.0426598	0.00422968	0.00633774	0
E9PQC9	0	0	0	0	0	0	1	0	0	0	0	0	0	0
E9PQD7;P15880	0.0198156	0	0.163612	0.178471	0.208394	0.258993	0.184482	0.349861	0.350832	0.473902	0.675403	1	0.423214	0.529038
E9PQM8;E9PRF4;Q15047;Q15047-3	0.820247	1	0.692362	0.741134	0.398947	0.18812	0.303197	0.127033	0	0.234072	0	0	0.243923	0.177631
E9PQY2;Q9NQP4	0.560991	1	0.639302	0.481888	0.499775	0.353841	0.220865	0.194062	0.165439	0.175393	0	0	0.137585	0
E9PQZ2;Q11206;Q11206-2;Q11206-3;Q11206-4;Q11206-5;Q11206-6;Q11206-7	0	0	0	0	0.00539524	1	0.881609	0.614915	0.493533	0.223464	0	0	0	0.411909
E9PR30;P62861	0	0	0	0.0755024	0.130964	0.20419	0.232135	0.399343	0.46661	0.671782	0.587295	0.932292	1	0.820175
E9PR76;E9PSH4;Q9H063	0.454526	0.492312	1	0	0	0.400685	0	0	0	0	0	0	0	0
E9PR92
E9PRP3	0	0	0.0191091	0.0777862	0.113527	0.0830791	0.0714837	0.0777409	0.0855335	0.196698	0.838015	1	0.847051	0.360273
E9PRQ7;Q04323	0.753969	0.985951	1	0.827721	0.657808	0.435308	0.469462	0.203643	0.152164	0.143654	0.0354664	0	0.0435496	0.00887767
E9PRU1;O95967	0.794361	1	0.640337	0.575031	0.512825	0.318263	0.240863	0.208373	0.211244	0	0.12516	0.162534	0	0.283628
E9PS41;Q6RFH5;Q6RFH5-2	0	0	0	0	0	0	0	0	0	0	0	0	0	1
E9PS44;Q01628	0.269001	0	0.272482	0.245623	0.681243	0.616377	0.935351	1	0.793111	0.442435	0.254895	0.229141	0.0509114	0.5431
E9PSA5;Q96Q83
E9PSI1	0.353006	1	0.305178	0.226203	0.270056	0.463793	0.367637	0.270447	0.292084	0.214992	0.175557	0.117948	0	0.161949
ENSEMBL:ENSBTAP00000001528	0.299123	0.581012	0	0	0	0.288757	0.239958	0.785672	0.638642	1	0.927314	0.522866	0.665107	0.966258
ENSEMBL:ENSBTAP00000007350	0	0.63418	0	0	0.380083	0.4367	0.216226	0.772039	1	0.729789	0.774034	0	0.541027	0.369738
ENSEMBL:ENSBTAP00000024146	0.108744	0.101895	0.0459469	0	0.105263	0.408383	0.562619	0.682904	1	0.511711	0.757482	0.850918	0.624765	0.526248
ENSEMBL:ENSBTAP00000024462;ENSEMBL:ENSBTAP00000024466	0	0	0	0	0	0	0	0	0	0.625113	1	0	0	0
ENSEMBL:ENSBTAP00000038329;REFSEQ:XP_001252647
F2Z2H4;J3KPC0;Q5VVY4;Q86XD8	0	0	0	0	0	0.884613	0	0.914951	1	0	0	0	0	0
F2Z2J1;Q15349;Q15349-2;Q15349-3	0.979887	1	0.771835	0.711272	0	0.442445	0.351258	0.122541	0.299053	0.0940875	0.187131	0.101823	0.239931	0.171366
F2Z2U4;H0Y4W2;Q9Y4A5;Q9Y4A5-2	0.241699	0	0	0	0	0	0	0	0	0	0	0	0.082569	1
F2Z2W7;Q8IZ69;Q8IZ69-2	0.818025	1	0.801156	0.672119	0.797572	0.62823	0.728936	0.68341	0.367106	0.186985	0	0	0.832243	0.182888
F2Z2X4;Q9C0E2	0.688717	1	0.921756	0.650825	0.438809	0.31991	0.418651	0.244547	0.31898	0.2609	0.21603	0.162263	0.502493	0
F2Z2X9	0.087677	0	0.0647272	0.114683	0.420054	0.978777	1	0.834582	0.805786	0.713196	0.495841	0.366796	0.235997	0.588557
F2Z357;J3KPC5;P47736;P47736-4	0.823694	0.615884	1	0.578443	0.271958	0.261407	0.281382	0.133059	0.201581	0.131482	0	0	0	0
F2Z3K0	0	0	1	0	0.336614	0	0.178706	0	0	0	0	0	0	0
F5GWB9;I3L1L5;I3L2B9;I3L4D7;I3L4R7;I3L517;Q8NHS9;Q8NHS9-2;Q8NHS9-3
F5GWI0;F5H2L3	0.487696	1	0.762381	0.570671	0.508239	0.365536	0.125796	0.305166	0	0	0	0	0	0
F5GWI4;P00813	0.814249	1	0.363184	0.425506	0.206002	0.115223	0.124163	0.160968	0.17864	0.114978	0.2651	0	0	0.189088
F5GWR7;P23468;P23468-2;P23468-3;P23468-4;P23468-5;P23468-6;P23468-7;Q3KPI9
F5GX19;F5H3Y3;Q6IAA8	0.172984	0	0.0200574	0.0538066	0.268896	0.302388	0.932308	0.858585	0.927439	0.801624	1	0.53196	0.309268	0.26292
F5GX23;F5H5V4;J3KN29;O00233;O00233-2	0.550717	0.804171	1	0.848226	0.623884	0.369496	0.279696	0.227052	0.18225	0.186759	0.060612	0	0.102504	0.0161562
F5GX26;Q7Z3Z4;Q7Z3Z4-2;Q7Z3Z4-3	0	0	0	0.468524	0.632278	0.614171	0	0.502653	0.306085	0	0	0	1	0
F5GXC5;H3BUJ1;Q8TB96	0	0	0	0.297476	0.907249	0.920809	1	0	0	0.703733	0	0	0	0
F5GXJ1;F5H5N1;O75251;O75251-2	0.046014	0	0	0	0.0159708	0.0378043	0.0735398	0.0798736	0.138591	0.307295	0.860685	1	0.257306	0.28619
F5GXW5;Q99622	0.498529	1	0.631242	0.379137	0.246634	0.206527	0.296519	0.137545	0.0736909	0.12273	0	0.0240392	0.0276227	0.249886
F5GXX5;P61803	0.0677535	0	0.0161424	0.0465943	0.106995	0.225575	0.215791	0.246724	0.380458	0.378838	0.926203	1	0.894325	0.710634
F5GXX6;F5H271;Q9NQ89	0	0	0	0.770456	0	0.55671	0.580814	0.125036	1	0	0	0	0	0
F5GY03;P09486	0	0	0	0	0.197145	0.373052	0.312258	0.539299	0.662125	0.327947	0.325907	0.887355	0.525279	1
F5GY80;F5H7G1;P07358	0	0	0	0	0.464368	0.446242	0.246264	1	0.796204	0.429016	0.450535	0.445256	0.487317	0.457783
F5GYJ5;Q9NX18	0.06716	0	0	0	0	0	0	0	0.15413	0.87725	0.743647	0.862223	1	0.472828
F5GYK2;Q9NRL3;Q9NRL3-3	0.652955	1	0.620653	0.509734	0.319455	0.249547	0.257659	0.221526	0.363747	0.371305	0	0	0.507384	0.435854
F5GYQ1;P61421	0.0821275	0	0.00535268	0.0560003	0.141474	0.566477	0.582354	0.863194	0.946192	0.872558	1	0.740115	0.330649	0.95622
F5GYQ6;H7C1B8;H7C499;Q96HL8;Q96HL8-2;Q96HL8-3;Q96HL8-4;S4R3I7
F5GYQ7	0	1	0	0	0	0	0	0	0	0	0	0	0	0
F5GZ54	0	0	0	0	0	0	0	0	0	0	1	0	0.547594	0
F5GZ97;Q9Y3C0	0.318242	0	0	0.821171	0.810924	0.699215	1	0.590496	0.913347	0.402076	0	0	0	0
F5GZG1	0	0	0	0	0	0	0.193763	0.622889	1	0	0	0	0	0
F5GZQ1	0	0	0	1	0	0.76024	0.214244	0.731992	0	0	0	0	0	0
F5GZY7;Q9H0R8;Q9H0R8-2	0.65225	1	0.657609	0.412456	0.31158	0.0696141	0.39489	0.170112	0	0.12333	0.104275	0.141015	0.0588171	0.207838
F5H001;F5H7N8	0.679504	0	0	1	0.819442	0.248981	0.611428	0.190751	0.330925	0	0	0	0	0
F5H039;Q9NQX3;Q9NQX3-2	0.669011	0.950817	1	0.789207	0.400491	0.399763	0.301663	0.265463	0.189297	0.185124	0.00809123	0	0.0512249	0.0501202
F5H0C4;Q9BRP4;Q9BRP4-2	0.347036	0.554858	1	0.717542	0.301098	0.277908	0.226184	0.204405	0.195012	0	0	0	0	0
F5H0F9;Q9UJX4;Q9UJX4-3	0	0	0.802783	1	0.37136	0.400174	0	0	0.173755	0.411683	0	0	0	0.771629
F5H0R1;H3BRB1;Q9H6E5	0.839048	1	0.688916	0.0697949	0.45248	0.372723	0	0.31584	0	0	0	0	0	0
F5H0U5;Q9NZD2	0.923876	1	0.525867	0.439909	0.363519	0.280557	0.279309	0.166324	0.122866	0.087746	0	0	0.1092	0
F5H101;F8WE42;Q76FK4;Q76FK4-4	0	0	0	0	0	0	0	0	0	0	0	0	0.149048	1
F5H116	0	0	0	0	0	0	0	0	0	0	1	0	0	0
F5H157;Q15286	0.480735	0	0.131242	0.200666	0.227337	0.489893	0.374687	0.549098	0.934981	0.789428	1	0.963723	0.344077	0.830056
F5H199;F5H7C4;Q8IXL7-2	1	0.846806	0.859214	0.650876	0.463596	0.239083	0.40744	0.317972	0.198005	0.169267	0	0	0	0.289005
F5H1R2;Q8IY45;Q8IY45-2	0	0	0	0	0	0	0	1	0	0	0	0	0	0
F5H1R4;K7EM85;K7ES92;K7ES98;Q92619;Q92619-2	0.816974	0	0	0	0.549391	0.679084	0.456949	1	0.371524	0.760244	0	0	0	0.794854
F5H1S1;Q92521	0	0	0	0	0	0.21813	0	0	0.279595	0	0	0.393534	1	0.498994
F5H1U9;O75970;O75970-3	0.790214	1	0.580193	0.445907	0.142437	0.0930293	0.112776	0.190905	0.275522	0.307401	0.071517	0	0.0956364	0.161457
F5H1Z6;Q9Y365	0.766449	1	0.45571	0.352028	0.177311	0.191231	0.135669	0.0921191	0.0600278	0.0449481	0.0116402	0	0.0018761	0.0205611
F5H265	0	0	0	0	0	0	0.183015	0.459372	0.366712	1	0.267821	0.334157	0.312747	0.132664
F5H269;Q9Y485	0.89084	0	0.465577	0.560293	0.356549	0.390498	0.224129	0.213291	0.168239	0.192744	1	0	0.25625	0.027913
F5H2B9;H0YNH8;Q9BZF9;Q9BZF9-2
F5H365;Q15436	0.389689	0.507645	0.455531	0.610608	0.901891	1	0.543055	0.615027	0.396404	0.220775	0.0921517	0	0.0404188	0.0110511
F5H369;O75747	0.40745	1	0.393582	0.0420186	0.0418699	0.256077	0.315007	0.0604147	0.0552835	0.0962333	0	0.5176	0.326487	0.427851
F5H3G9;F5H4N6;Q9Y3R0;Q9Y3R0-2;Q9Y3R0-3	0	0	1	0.356647	0.545337	0	0.863621	0.143436	0	0	0	0	0	0
F5H3Y4;Q8IY37	0	0	0	0.0681585	0	0	0.0860001	0	0	0.118248	0	0.331586	0	1
F5H442;Q99816	0.690326	1	0.885783	0.449783	0.346479	0.283217	0.206524	0.163802	0.224655	0.12816	0.0270498	0	0.0569858	0.102645
F5H459;Q92572	0.363987	0	0.674085	0.301189	0.33797	0.23778	0.230849	0.271955	0.755248	1	0.448957	0.415082	0.417169	0.591844
F5H4F1;Q99638	0	0	0.00747682	1	0.272933	0	0	0.135959	0.149106	0	0	0	0	0
F5H4R1;F5H538;J3KNB8;Q9Y6R4;Q9Y6R4-2	1	0.910246	0.750257	0.627273	0.314891	0.17052	0.217923	0.160614	0.274659	0.183343	0.194379	0.0533431	0.0268728	0
F5H4X9	0	0	0	1	0	0	0	0	0.21542	0.228672	0	0	0	0
F5H523;Q9P2K6	0.547732	0.772707	1	0.859195	0.474257	0	0.193111	0	0	0	0	0	0	0
F5H5A3;Q8IVH8;Q8IVH8-2;Q8IVH8-3	0	0	0	0	0.621796	0	0	0	0.72863	0	0	0	0.881098	1
F5H5I6;H0Y8R1;H0YAK1;Q12849	0.0963546	0	0.0712571	0.0610421	0.0918752	0.0485439	0.0754611	0.0551061	0.0725275	0.123191	0.661159	1	0.905574	0.432064
F5H5P2;P12694	0.0133104	0	0.0747611	0.0802018	0.0679007	0.0390555	0.0460131	0.0512618	0.071027	0.331201	0.830176	1	0.768923	0.525288
F5H5R8;P18440	0.644694	1	0.775259	0	0.346277	0.362469	0.392624	0	0.303508	0.17013	0	0	0	0
F5H5T5;Q7Z3V4	0.246452	0.907745	1	0.338026	0.262032	0	0.173997	0.0581846	0.147143	0.313481	0.248435	0.41174	0.062558	0.130031
F5H619;Q86XA9;Q86XA9-2	0.529155	1	0.932803	0.518444	0.523907	0.449656	0.343427	0.413795	0.315381	0.152362	0	0	0.158896	0.0893883
F5H658;Q14562	0	0	0	0	0	0	0	0	0	0	0	0	0	1
F5H6Q1;J3KR44;Q96FW1	0.753261	1	0.645289	0.467523	0.292872	0.182566	0.129303	0.0883307	0.0900104	0.0422633	0.00774845	0	0.0111843	0.00962237
F5H6U7;G3V1U5;Q9Y3E0	0	0	0	0	0.291282	0.821797	1	0.81552	0.523754	0.365413	0.169084	0.341207	0.306001	0.0550222
F5H6Z0;Q00537;Q00537-2	1	0.949872	0.603044	0.622759	0.420295	0.432114	0.34865	0.26443	0.417128	0.016465	0	0.118658	0.312051	0.194025
F5H702;Q96GC5;Q96GC5-3	0	0	0.0447915	0.0922517	0.0589317	0.0635822	0.113871	0.107159	0.263782	0.242651	1	0.880968	0.485142	0.556068
F5H760	0	0	0	0	1	0	0	0	0	0	0	0	0	0
F5H785;P0DI81;P0DI81-3;P0DI82
F5H7I0;Q8NC69	0	0	0.9825	1	0	0	0	0	0	0	0	0	0	0
F5H7I4;H9ZYI9;Q06547;Q06547-2;Q06547-3;Q06547-4	0.423656	1	0	0	0.446192	0	0.106077	0	0.0680074	0	0	0	0	0.976825
F5H7J9;H0YGW5;O75581	0	0	0	0	0	0	0	1	0	0	0	0	0	0
F5H7P7;Q96BP3	0.640384	1	0.607103	0.634975	0.485393	0.453328	0.38098	0.825789	0.29661	0.284918	0.157239	0	0.378649	0.931968
F5H7S3	0.175981	0.28658	0.0991109	0.0495512	0.105242	0	0.0272514	0.148112	0.200996	0.449256	0.394919	0.235612	1	0.544959
F5H7V9;J3QSU6;P24821;P24821-2;P24821-3;P24821-4	0.422462	0.334233	0.292299	0.301927	0.223778	0.165413	0.173414	0	0.117979	0.0735633	0	0.218209	0.0333865	1
F5H8F7;Q9UBL3;Q9UBL3-3	0.394653	0.585247	1	0.719496	0.520294	0.453326	0.352115	0.365961	0.375691	0.142625	0	0.279312	0.504667	0.96817
F5H8H2;Q03426	0.800084	1	0.455602	0.394991	0.215506	0.233031	0.159603	0.116105	0.0959218	0.0400676	0	0.0114643	0.0217405	0.000246333
F6M2K2;F6M2K4;Q14686	0	0	0	0	0	0	0	0	0	0	0	0	0	1
F6QDS0;I3L0H8;Q9NUU7	0.648384	1	0.557983	0.558737	0.535962	0.412618	0.312503	0.188545	0.263734	0.130742	0.130183	0	0.289834	0.0341891
F6QTA4;Q5JQZ9;Q9BWU1;Q9BWU1-2	0	0	0	0.521939	0	0	0	0	0	0	0	0	0	1
F6RY50;Q96FS4	0.139702	0.440305	0	0.3435	0.246361	0.0126182	0.0642128	0.119454	0.275126	0.365643	0.704212	0.916621	0.528578	1
F6SDV2;Q9GZM7;Q9GZM7-3	0	0	0	0	0	0	0	1	0	0	0	0	0	0
F6SFZ6;Q99571;Q99571-2;Q99571-3	0.166285	0	0.0885241	0.0813275	0.255838	0.409544	0.379685	0.405546	0.609531	0.664043	0.633517	0.647063	0.30418	1
F6TB26;Q5SZR4;Q9Y2W6	0	0	0	0	0	0.0681043	0.111324	0.289971	0.269691	0.242882	0.919331	1	0.476466	0.587251
F6UJY1;J9JIE9;Q5T013	0.612631	1	0.474814	0.52879	0.335747	0.194503	0.221768	0.159695	0.0585783	0.0617218	0.0656451	0.0500792	0.0263117	0
F6VRR5;Q9BY77	0	0	0	0	0	0.202355	0.543328	0.205701	0.186809	0	0	0	0.205903	1
F6VZ39;H0YA61;Q9BX46;Q9H0Z9;Q9H0Z9-2	0	0	0	0	0	0	1	0	0	0	0	0	0	0
F6XA08;Q5VYX0;Q5VYX0-2	0	0	0	0	0	0	0	0	0	1	0	0	0	0
F6XHT0;Q9Y6D0	0.0940081	0	0	0	0.125702	0.32945	0.823399	1	0.689466	0.644925	0.264322	0.294025	0.174763	0.212018
F6XZD3;Q8N283	0.91202	0.937568	0.737606	0.573471	0.130481	0.211557	0.176944	0.094606	0.25535	0.331068	0.911375	1	0.866962	0
F8VP71;Q6P1Q0;Q6P1Q0-2;Q6P1Q0-4;Q6P1Q0-7	0	0	0	0	0	0.051793	0.0954067	0.136425	0.178268	0.389017	0.712598	1	0.396882	0.573359
F8VPD4	0.39025	0.525002	1	0.797148	0.454137	0.424779	0.31182	0.264725	0.207536	0.15341	0	0.0060462	0.0938621	0.0318114
F8VPN1;F8VQE3;F8VRQ9;F8VUB3;F8VWP8;F8VXS2;F8VZI3;F8W0X2;Q9P1Z2;Q9P1Z2-2;Q9P1Z2-3	0.816354	0	0.678944	1	0	0.229077	0.361913	0.310542	0	0	0	0	0	0
F8VQD9;F8VVA0;Q9BSB4	0.847547	1	0.555822	0.420243	0.2625	0.145108	0	0.120888	0	0	0	0	0	0
F8VQR7;F8VW96;Q16527	0.461429	0	0	0.241994	0.166037	0.336312	0.958617	1	0.820656	0.778867	0.699826	0.845059	0.812532	0.656398
F8VRE8;Q96HH6;Q96HH6-2	0.105992	0	0.130609	0.168534	0.375026	0.86659	0.46177	0.85125	1	0.751192	0.655718	0.532526	0.446233	0.642757
F8VRX1;O95398;O95398-2;O95398-3
F8VS61	0	0	0	0	0	0	0	0	0	0	0	0	0	1
F8VTY2;Q8NFH4	0.204751	0.268971	0.20706	0.126476	0.0749374	0.072181	0.0832925	0.0739684	0.0487744	0	0.124006	0	0.149632	1
F8VU90;Q9NYL4;Q9NYL4-2	0.0203576	0	0	0	0.0757869	0.143696	0.215625	0.31683	0.36481	0.454874	0.595199	1	0.843934	0.345648
F8VUB4;F8VV52;Q9NZN8	0.549139	0.189739	0.291633	0.712106	0.394375	0.534046	0.561889	0.781967	0.477515	0	0.312475	0.313136	1	0.119094
F8VUC5;F8VVA7;F8VXB1;F8VXR1;F8VYZ4;F8W156;P61923;P61923-4;P61923-5	0.348025	0.49203	0.629079	0.399631	1	0.858201	0.61297	0.569537	0.358012	0.221546	0.241434	0.199297	0.325052	0
F8VUF6;F8VWU0;F8VX58;F8VXZ8;P07585;P07585-4
F8VUJ3;Q8N4A0	0	0	0	0	0.23544	0.897283	0.824183	1	0.607017	0.324443	0	0	0	0.530152
F8VUY8;Q96QD8	0	0	0	0	0	0	0	1	0	0	0	0	0	0
F8VV56;F8VWK8;F8W022;P08962;P08962-2;P08962-3	0.214002	0	0.104076	0.151931	0.360153	0.278086	0.728245	0.827317	0.869703	0.661516	1	0.504527	0.378605	0.497019
F8VVL1;O43583	0.804188	1	0.800336	0.792511	0.64747	0.64706	0.669551	0.585156	0.508629	0.35851	0.202115	0.107565	0.364321	0
F8VW50;Q2TAC6;Q2TAC6-2;Q2TAC6-3	0	0	0	0	0	0.608257	0	0.506967	1	0	0	0	0	0
F8VWS0;P05388;P05388-2	0.0313727	0	0.0560844	0.105856	0.182228	0.249723	0.326966	0.368583	0.531613	0.51534	0.642323	1	0.763658	0.584132
F8VWT9;J3KPF0;Q9Y4D8;Q9Y4D8-4	0	0	0	0.251594	0.476725	0.44087	0.280657	0.475043	0	0	0	0.923807	0	1
F8VWW7;Q8NCJ5	0	0	0	0	0.478684	1	0	0.47078	0.220644	0	0.545482	0	0	0
F8VWY2;Q9UBM8;Q9UBM8-2	0.386979	0.635116	1	0	0	0.416583	0	0.358197	0.381167	0	0	0.0100729	0	0
F8VWZ8;Q52LW3	0	0	0	1	0	0	0	0	0	0	0	0	0	0
F8VX10;F8VXI8;H0YIQ8;Q9H9L4	0	0	0	0	0	0	0	0	0.104074	0	0	0	0	1
F8VXC8;Q8TAQ2;Q8TAQ2-2;Q8TAQ2-3	0.0972482	0.0816548	0.106507	0.111926	0.0598234	0.0312717	0.0264911	0.0220658	0	0.0254251	0.0447512	0.0988884	0.103808	1
F8VXD5;Q53FV1	0	0	0	0	0.401622	0.6613	0.595018	0.488798	1	0.783034	0.705253	0.537211	0.268623	0
F8VXH0;J3KQA0
F8VXY6;G3V1V1;Q8TBF4	0	0	0	0	0.165021	0	0	0	0.380594	0.263904	0.448664	0	0.407176	1
F8VYE8;P36873;P36873-2	0.718084	0.742997	0.440608	0.384159	0.0609745	0.0853645	0	0.23338	0.270648	0.114358	0.252752	0.280606	0.296869	1
F8VZA0;Q9H0K6
F8W038;Q8IXM2;Q8IXM2-3	0	0.708819	0	0.297584	0.339069	0.658136	1	0.319696	0.644623	0.0531845	0	0	0	0.65721
F8W0A2	1	0	0	0	0	0.000296004	0.142788	0	0	0	0	0	0	0
F8W0A3	0	0	0	0	0	0	0	0	0	0	0	0	0	1
F8W0Q9;Q8NEY8-2;Q8NEY8-8;Q8NEY8-9	0	0	0	0	0	0	0	0	0	0	0	0	0.378985	1
F8W0U9;Q149M9;Q149M9-3	0.754325	0	1	0	0	0	0	0.851441	0.928463	0.119605	0.917508	0	0	0
F8W111;P14384	0	0	0	0	0	0	0.29146	0.560553	0.49752	1	0.017887	0	0.0157764	0.655019
F8W1A4;P54819;P54819-2	0.364976	0.492239	0.131857	0.158529	0.0357893	0	0.025338	0.0456164	0.0776573	0.429094	0.998092	1	0.579494	0.382485
F8W1B3	0	0	0	0	0.184161	0.689891	0.769317	0.883666	0.651022	0.426975	0.631922	1	0.593824	0.282276
F8W1C3;Q99542	0	0	0	0	0	0	0.447236	0.28575	0.374959	0.556305	0	0	0	1
F8W1R9;P36897;P36897-2;P36897-3	0	0	0	0	0	0.391085	0.175563	0.755194	0.802836	0.618508	0.561068	1	0.403834	0.492662
F8W6G1;Q9UHY1	1	0.601378	0.525549	0.528575	0.277075	0.268232	0.175955	0.307817	0.0614448	0.150103	0	0	0	0
F8W6M3;H0Y6A5;Q9NYG2;Q9NYG2-2	0	0	0	0	0	0	1	0	0	0	0	0	0	0
F8W6W2	1	0	0	0	0	0	0	0	0	0	0	0	0	0
F8W703;Q9HCK4;Q9HCK4-2;Q9HCK4-3;R4GMM8	0	0	0	0	0	0	0	0.459801	0.962809	0.720741	0.10715	0.1551	0	1
F8W726	0.901939	0.677517	0.594193	0.5961	0.47547	0.560029	1	0.801057	0.813512	0.795991	0	0.656932	0.528198	0.440548
F8W727;P62910	0.0213863	0	0.054008	0.0764261	0.193384	0.22266	0.240975	0.487955	0.596186	0.548457	0.857189	1	0.950099	0.567475
F8W775	0.911849	1	0.419433	0	0	0	0	0	0	0	0	0	0	0
F8W776;Q8TC24;Q9H9S3;Q9H9S3-2;Q9H9S3-3	0	0	0	0	0	0.020664	0	0.0310366	0.10923	0.175403	0.520977	1	0.612996	0.111199
F8W7A7;J3KSU3;Q5BJE1;Q5BJE1-2;Q5BJE1-3;Q5BJE1-4	0	0	0	0	0	0	0	0	0	0	1	0.212367	0	0
F8W7C6	0	0	0	0	0	0	0	0	0.71741	0	0.95363	1	0.85792	0
F8W7L6;P42262;P42262-2;P42262-3;P42262-4	0	0	0	0	0.646453	0.274977	0.629311	0	1	0	0	0.108235	0.77304	0
F8W7Q2	0	0	0.864509	0.275566	0.260248	1	0.82565	0.23325	0.317054	0	0	0	0	0
F8W7Q4;Q96A26	0.0210161	0	0	0	0.0428653	0.0162462	0.113138	0.247766	0.0734109	0.489722	0.469745	1	0.505457	0.0829936
F8W7S5	0.32552	0.91494	1	0.257596	0.717742	0.415112	0.338017	0.0617494	0	0.0278729	0.441467	0.0905328	0.378172	0.248301
F8W7T1;Q92784-3	0	1	0.724012	0.970771	0	0	0	0	0	0	0	0	0	0
F8W876;P48740;P48740-2;P48740-3;P48740-4
F8W8H5;Q969Q5	0.373676	0	0.138485	0.153017	0.228226	0.337964	0.418784	0.387055	0.500186	0.741987	1	0.904272	0.529766	0.489011
F8W930;Q9Y6M1;Q9Y6M1-1;Q9Y6M1-3;Q9Y6M1-4;Q9Y6M1-5;Q9Y6M1-6	0.791575	0	0.893339	0.613884	0.895939	0.727882	0.407942	0.566952	0.495587	0.826452	0.545641	0.544774	1	0.770211
F8W9E7;Q96BJ8;Q96BJ8-2;Q96BJ8-3	0.552849	0	1	0.57183	0.436855	0.328047	0.468815	0.458652	0.366831	0.29802	0.45469	0.264408	0.323819	0.330128
F8W9J4;Q03001	0.554605	0.502927	1	0.299586	0.0887341	0	0.169626	0.0963948	0.214986	0.295872	0.397633	0.728591	0.620932	0.752571
F8W9Q8;G3V426;Q86TW2;Q86TW2-2	0	0	0	0	0	0	0	0	0	0.750229	0.703306	1	0.552715	0.40577
F8W9U4	0	0	0	0	0	1	0	0	0	0	0	0	0	0
F8W9X7;Q567U6	0	0.380081	0.183585	0.174335	0.742961	1	0.890339	0.822693	0.700951	0.443689	0.136652	0.0917062	0.2513	0.299073
F8WA11;Q7Z460;Q7Z460-2;Q7Z460-3;Q7Z460-4;Q7Z460-5	0.520147	1	0.570661	0.584681	0.417583	0.303314	0.344297	0.176868	0.151981	0.288353	0.0663134	0	0.0841751	0.0862823
F8WAJ0;Q9H8H2;Q9H8H2-2;Q9H8H2-4	0	0	0	0	0	0	0	0	0	0	0	0	0	1
F8WAS2	0	0	0	0	0	0	0	0.599756	1	0	0	0	0	0
F8WB95;G3V0G5;Q8IV38	0.695925	0.919315	1	0.544753	0.184325	0.22188	0.19721	0.119189	0.176275	0.114216	0.057364	0	0	0
F8WBF9;Q5TH30;Q9UGV2;Q9UGV2-2;Q9UGV2-3	1	0	0.347042	0	0	0	0	0	0	0	0	0	0	0
F8WBJ6;Q9NRX1	0	0	0	0	0.288672	0	0.270016	0	0	0	0	0	0.228261	1
F8WBQ5;F8WDJ7;Q03938	0	0	0	0	0	0	0	0	0	0	1	0	0	0
F8WBW1;F8WC41;Q86X83;Q86X83-2	0	0.435461	0.283195	0.525065	0.164315	0.335295	1	0.579119	0.407102	0.0361324	0.322363	0.311702	0.245747	0.316036
F8WC62;Q96KD3;Q96KD3-2	0	0.393149	0.486875	0	0.810694	0	0.425137	1	0.484651	0	0.414102	0.387297	0.324829	0.601483
F8WCX2;H0Y5I5;Q8N1G0;Q8N1G0-2	1	0.272581	0	0.00336468	0.69851	0	0.618571	0.661524	0	0.0274922	0	0.366771	0	0
F8WDE4;Q9NP87;Q9NP87-2	1	0	0	0	0	0	0	0	0	0	0	0	0	0
F8WDT6;H7C2C9	1	0	0	0.327483	0.428507	0.711711	0.773304	0.919083	0.486361	0.398414	0	0	0	0
F8WDV0;Q9UI26;Q9UI26-2	0.686965	1	0.733355	0.622476	0.339659	0.233822	0.211813	0.204987	0.218495	0.0917021	0	0	0	0
F8WDW2
F8WEA2	0	0	0	0	0.186867	0	0.403866	0.973882	0.845534	1	0	0.601426	0.406751	0.200259
F8WEM8
[truncated: 5,988 more rows]

## Sheet: 05_C
class	chow_median_Fr.1	chow_median_Fr.2	chow_median_Fr.3	chow_median_Fr.4	chow_median_Fr.5	chow_median_Fr.6	chow_median_Fr.7	chow_median_Fr.8	chow_median_Fr.9	chow_median_Fr.10	chow_median_Fr.11	chow_median_Fr.12	chow_median_Fr.13	chow_median_Fr.14
Cytosol	0.65143	0.846801	0.604438	0.523089	0.349679	0.268508	0.233242	0.18899	0.174981	0.145144	0.0842679	0.0618508	0.0934583	0.10279
ER	0.0837597	0.0341349	0.0520743	0.0606941	0.200316	0.456954	0.666843	0.744532	0.712477	0.540204	0.559005	0.577801	0.441353	0.439973
Golgi	0.167047	0.107153	0.117852	0.17164	0.350651	0.71509	0.693989	0.640098	0.506505	0.297362	0.163138	0.160997	0.103728	0.257751
LD	0.590098	0.117465	0.090513	0.108447	0.182789	0.323534	0.425038	0.545857	0.493286	0.38077	0.424003	0.41521	0.276788	0.317767
Lysosome	0.120178	0.0961154	0.0374198	0.0562025	0.102195	0.137144	0.278785	0.425554	0.558858	0.575812	0.577844	0.568506	0.52444	0.695776
Mitochondria	0.0796697	0.0815682	0.065402	0.0514658	0.0425614	0.0411631	0.0532888	0.074646	0.109109	0.247636	0.703817	0.919251	0.580118	0.500544
Nucleus	0.15294	0.191546	0.17973	0.173299	0.152941	0.128418	0.125429	0.124114	0.120346	0.119147	0.119996	0.193659	0.295498	0.891711
PM	0.166212	0.0860368	0.0761403	0.0870909	0.11584	0.200641	0.330286	0.501831	0.607037	0.585802	0.564024	0.450654	0.267697	0.745683
Peroxisome	0.33132	0.28871	0.151462	0.123873	0.0626215	0.041597	0.0672552	0.0971268	0.239354	0.534108	0.94301	0.886024	0.649825	0.315571
Endosome	0.31707	0.340578	0.319231	0.370968	0.452115	0.580986	0.512448	0.499384	0.493068	0.382298	0.236512	0.214638	0.176387	0.370212
Protein-Complex	0.400601	0.559973	0.780814	0.654938	0.419491	0.356532	0.282463	0.237559	0.250308	0.180831	0.112716	0.0922181	0.150505	0.161787

## Sheet: 05_D
Class	True Positives
Peroxisome	100
Protein-Complex	69.5238
Cytosol	81.5891
LD	62.8571
Lysosome	87.0968
PM	58.4615
Mitochondria	95.4248
Nucleus	90.1639
Golgi	85.4839
Endosome	48.9796
ER	85.4985
weighted	83.3061

## Sheet: 05_E
Composition chow
Class	Count
Peroxisome	264
Protein-Complex	552
Cytosol	1647
LD	352
Lysosome	167
PM	378
Mitochondria	997
Nucleus	1219
Golgi	662
Endosome	194
ER	881

## Sheet: 05_F
Multilocalization chow
Localizations	Count
1	4621
2	2167
3	488
4	37

## Sheet: 05_G
Identifier	CC_PROTEIN-COMPLEX	CC_NUCLEUS	CC_LD	CC_PEROXISOME	CC_ER	CC_ENDOSOME	CC_CYTOSOL	CC_MITOCHONDRIA	CC_GOLGI	CCLYSOSOME	CC_PM
A0A024QZ33;K7EK40;K7EMD8;K7ERM9;Q9H0G5	0.483754	0	0	0	0	0	0	0	0.516246	0	0
A0A024QZW4;Q9H1N7	0	0	0	0	0	0.208212	0	0	0.791788	0	0
A0A024QZX5;A0A087X1N8;A0A2R8YD12;P35237	0	0	1	0	0	0	0	0	0	0	0
A0A024R3B9;E9PJL7;E9PNH7;E9PRA8;P02511	1	0	0	0	0	0	0	0	0	0	0
A0A024R4E5;Q00341	0	0	0	0	0	0	0	1	0	0	0
A0A024R571;Q9H4M9
A0A024R5I4;O94956	0	0	0	0	0.419297	0	0	0	0	0.277834	0.30287
A0A024R6I7;P01009	0	0	1	0	0	0	0	0	0	0	0
A0A024R7W5;A0A087WY31;A0A087X0Q1;Q7Z739	0	1	0	0	0	0	0	0	0	0	0
A0A024RA52;P25787	1	0	0	0	0	0	0	0	0	0	0
A0A024RAC6;Q14241	0	0	0	0	0	0	1	0	0	0	0
A0A024RBG1;Q9NZJ9-2	0	0	0	0	0	0	1	0	0	0	0
A0A024RCG2;Q96BI1	0	0	0	0	1	0	0	0	0	0	0
A0A024RCN4;A0A087X2F1;B4DMT1;Q16670;Q16670-2	0	0.677675	0	0	0	0	0	0	0	0	0.322325
A0A024RCQ8;A0A0G2JH76;A0A0G2JHB6;A0A0G2JIU6;A0A0G2JK02;A0A0G2JKR3;A0A0G2JLA3;A0A0G2JLL3;A0A140T8X7;A0A140T9Y1;G8JLL2;Q9UMR5;Q9UMR5-2;Q9UMR5-3	0	0	0	1	0	0	0	0	0	0	0
A0A024RCR6;A0A0G2JK23;P46379;P46379-2;P46379-3	0	0	0	0	0	0	1	0	0	0	0
A0A044PY82	0	0	0	0	0	0	0	0	0	0.407769	0.592231
A0A067XG54;Q8NB49;Q8NB49-2;Q8NB49-3;Q8NB49-4
A0A075B6F0;H7BXG6;M0R167;Q9H0D2;Q9H0D2-2	0	0	0	0	0	0	0	0	1	0	0
A0A075B6F9;Q9Y314	0	0	0	0	0	0.38768	0	0	0.61232	0	0
A0A075B6G3;A0A087WTU7;A0A087WV90;A0A5H1ZRP8;P11532;P11532-11;P11532-4	0	0	0	0.550964	0	0	0	0	0	0	0.449036
A0A075B6U9	0	0	0	0	0	0	0	1	0	0	0
A0A075B6W5	0	1	0	0	0	0	0	0	0	0	0
A0A075B727;A0A075B728;P16284;P16284-2;P16284-3;P16284-4;P16284-5;P16284-6	1	0	0	0	0	0	0	0	0	0	0
A0A075B730;P58107	0	0.669742	0	0	0	0	0	0.330258	0	0	0
A0A075B749;A0A087WX83;Q5VU43;Q5VU43-3;Q5VU43-4
A0A075B754;Q96QE3;Q96QE3-2	0	0	0	1	0	0	0	0	0	0	0
A0A075B773;K7ELY8;O00623	0	0	0	0.385578	0	0	0	0.368948	0	0	0.245474
A0A075B784;E9PEW0;K7ELR5;Q8IXW9;Q9P275	0	1	0	0	0	0	0	0	0	0	0
A0A075B7B1;C9JIE4;O15061;O15061-2;O15061-3	0	0	0	0	0	0	0	0	0.608961	0.391039	0
A0A075B7B5;B7ZM87;O75044	0	0	0	0	0	0	1	0	0	0	0
A0A075B7F1;S4R3C0	0	0	1	0	0	0	0	0	0	0	0
A0A087WSV6;A0A087WSX8;A0A0B4J1W1;A0A0G2JLS4;A0A0G2JM99;A0A0G2JMY9;A0A0G2JNK9;A0A0G2JNM2;A0A0G2JNQ6;A0A0G2JNR3;A0A0G2JP64;A0A0G2JP80;A0A0G2JP96;A0A0G2JQ15;A0A0G2JQ44;A0A0G2JQ46;A8MVE2;D9IDM5;D9IDM6;F6RVM3;F6TER3;O75019;O75019-2;Q8N6C8;Q8N6C8-3;Q8NHL6;Q8NHL6-2;Q8NHL6-3;Q8NHL6-4;Q8NHL6-5
A0A087WSW7;A0A0B4J1V9;F6XU50;Q9NRZ9;Q9NRZ9-2;Q9NRZ9-3;Q9NRZ9-4;Q9NRZ9-5;Q9NRZ9-6	0	0	0.533754	0	0	0	0	0	0.466246	0	0
A0A087WSW9;A0A087WSY9;Q16881;Q16881-3;Q16881-4	0	0	0	0	0	0	1	0	0	0	0
A0A087WSY1;O15146;O15146-2;O15146-3;Q5T0B5	0	1	0	0	0	0	0	0	0	0	0
A0A087WSY5;Q96IY4	0	0	0	0	1	0	0	0	0	0	0
A0A087WSZ7;A0A1B0GW84;D6RHE0;Q08493;Q08493-2;Q08493-3;Q08499;Q08499-10;Q08499-11;Q08499-2;Q08499-3;Q08499-4;Q08499-5;Q08499-6;Q08499-8;Q08499-9;Q32MM7	0	0	0	0	0	0	1	0	0	0	0
A0A087WT18;Q96A73;Q96A73-2	0	0	0	0	0	0	0	0.419011	0	0.260658	0.320331
A0A087WT20;Q9NV06	0	1	0	0	0	0	0	0	0	0	0
A0A087WT23;A0A087WV67;O00124;O00124-3	0	0	0	0	0	0	0	0	1	0	0
A0A087WT34	0	0	1	0	0	0	0	0	0	0	0
A0A087WT44	0	0	0.285835	0	0.714165	0	0	0	0	0	0
A0A087WT59;P02766	0	0	0	0	1	0	0	0	0	0	0
A0A087WT84;Q9H9V9;Q9H9V9-2	1	0	0	0	0	0	0	0	0	0	0
A0A087WT87;P43003;P43003-2	0	0	0	0	0	0.530812	0	0	0	0.469188	0
A0A087WT95;P49753	0	0	0	0	0	0	0	1	0	0	0
A0A087WTA5;E7ERK9;Q9UI10;Q9UI10-2;Q9UI10-3	1	0	0	0	0	0	0	0	0	0	0
A0A087WTA8;P08123	0	1	0	0	0	0	0	0	0	0	0
A0A087WTJ6;O14627;P47902;P47902-2;Q99626	0	0	0	0	0	0	0	0	1	0	0
A0A087WTK0;A0A087WVC6;Q12913	0	0	0	0	0	0	0	0	0	0.436931	0.563069
A0A087WTM1;Q9Y6N7;Q9Y6N7-2;Q9Y6N7-3;Q9Y6N7-4;Q9Y6N7-5;Q9Y6N7-6	0	0	0	1	0	0	0	0	0	0	0
A0A087WTP3;Q92945	0	1	0	0	0	0	0	0	0	0	0
A0A087WTQ2;A0A3B3IT47;C9JGR9;E7EQ49;Q9Y2I8;Q9Y2I8-2;Q9Y2I8-3	0.397672	0	0	0	0	0	0.602328	0	0	0	0
A0A087WTS0;H0YJK8;P18283	0	0	0	0	0	0	1	0	0	0	0
A0A087WTT2;Q5JWB9;Q96A57;Q96A57-2	0	0	0	0	0	0	0	0	1	0	0
A0A087WTU3;Q9Y6I9
A0A087WTV6;A0A087WZR9;Q96C36	0	0	0	0.320748	0	0	0	0.679252	0	0	0
A0A087WTY4;P49454	0	1	0	0	0	0	0	0	0	0	0
A0A087WTY7;Q9H227	0	0	0	0	0	0	1	0	0	0	0
A0A087WTZ8;E5RFJ1;E5RHW9;E5RIM1;Q96MF7	0	0	0	0	0	0	0	1	0	0	0
A0A087WU02;Q96RQ1	0	0	0.200265	0	0.45276	0	0	0	0.346975	0	0
A0A087WU05;A0A087WY48;Q8IY22;Q8IY22-2;Q8IY22-3	0	1	0	0	0	0	0	0	0	0	0
A0A087WU07;Q5TGZ0;Q5TGZ0-2	0	0	0	0	0	0	0	0.658845	0	0	0.341155
A0A087WU25	0	0	0	0	0	0	0	1	0	0	0
A0A087WU31;A0A0A0MTB7;E9PE15;P51790;P51790-2;P51790-4;P51790-5	0	0	0.311655	0	0	0	0	0	0.688345	0	0
A0A087WU37;A0A087WWG3;A0A087X140;A0A0A0MRU4;A0A0A6YYH9;C9J3G2;H0Y857;Q5JTY5;Q5JTY5-2;Q5RIA9;Q5RIA9-3;Q5RIB0;Q5RIB3;Q8IUF1;Q9BRT8;Q9BRT8-2;Q9BRT8-3
A0A087WU51	0.61049	0	0	0	0	0	0	0	0.38951	0	0
A0A087WU53;Q9H0U3	0	0	0	0	0.707303	0	0	0.292697	0	0	0
A0A087WUB9;Q8WYA6;Q8WYA6-4	0	1	0	0	0	0	0	0	0	0	0
A0A087WUC6;E9PI68;Q15005	0	0	0	0	1	0	0	0	0	0	0
A0A087WUD3;Q9NRP0;Q9NRP0-2
A0A087WUE2	1	0	0	0	0	0	0	0	0	0	0
A0A087WUE4;A0A0G2JNN3;C9JMY0;Q96PV6;Q96PV6-1	0	0.658405	0	0	0	0	0	0	0	0	0.341595
A0A087WUE6;A4PB68;Q3T8J9;Q3T8J9-2;Q3T8J9-3;Q9H869;Q9H869-2;Q9H869-3;Q9H869-4;Q9H869-5;Q9H869-6;Q9H869-7;Q9H869-8;Q9H869-9	0	0	0	0	0	0	0	0	0.377784	0.622216	0
A0A087WUI6;Q8WXW3	0	0	0	0	0.552259	0	0	0	0.447741	0	0
A0A087WUJ1;Q9H400;Q9H400-2	0	0	0	0.581488	0	0	0	0	0	0	0.418512
A0A087WUJ4;Q92618	0	0.41666	0	0	0	0	0	0	0	0.349686	0.233654
A0A087WUK2;O14979;O14979-2;O14979-3	0	1	0	0	0	0	0	0	0	0	0
A0A087WUL2	1	0	0	0	0	0	0	0	0	0	0
A0A087WUL4;A0A087WX23;A0A087WZG9;B4DSP0	1	0	0	0	0	0	0	0	0	0	0
A0A087WUM5;Q5VZR0;Q9H4G4	0	0	0	0	0	0	0	0	0	0.429725	0.570275
A0A087WUQ6;P07203	0	0	0	1	0	0	0	0	0	0	0
A0A087WUT0;A0A0A0MR39	0	1	0	0	0	0	0	0	0	0	0
A0A087WUT6;O60841	0	1	0	0	0	0	0	0	0	0	0
A0A087WUU8;M0R3J2	0	0	0	0	0	0	0	1	0	0	0
A0A087WUV9	0	0	1	0	0	0	0	0	0	0	0
A0A087WUW9;Q9NXU5	0	1	0	0	0	0	0	0	0	0	0
A0A087WUZ7;Q9Y5W8;Q9Y5W8-2	0	0	0	0	1	0	0	0	0	0	0
A0A087WV01	0	0	0	0	0	0	0	1	0	0	0
A0A087WV05;Q99417
A0A087WV24;P20711;P20711-3	0	0	0	0	0	0	1	0	0	0	0
A0A087WV25;O95684;O95684-2	0	0	1	0	0	0	0	0	0	0	0
A0A087WV39;Q92698;V9GYD3	0	0.450821	0	0	0	0	0	0	0	0.294676	0.254503
A0A087WV96	0	0	0.333949	0	0	0	0	0	0.666051	0	0
A0A087WV97;Q8WU79;Q8WU79-2;Q8WU79-3	0	0	0	0	0	0	1	0	0	0	0
A0A087WVA1;P62341	0	0	0	0	1	0	0	0	0	0	0
A0A087WVA8;Q8IWB9;Q8IWB9-2	0	0	0.234116	0	0	0	0.765884	0	0	0	0
A0A087WVC1;Q9BQ39	0	1	0	0	0	0	0	0	0	0	0
A0A087WVE2;O00602	0	0.348163	0	0	0	0	0	0	0.244982	0.212946	0.193909
A0A087WVF1;K7EQH1;Q96B23;Q96B23-2	0	0.616602	0	0	0	0	0	0	0	0	0.383398
A0A087WVF7;Q9NZM3;Q9NZM3-2	0	1	0	0	0	0	0	0	0	0	0
A0A087WVI0;E9PBL8;Q8WTW3	0.433886	0	0	0	0	0	0.566114	0	0	0	0
A0A087WVM1;P78382;P78382-2;Q5W1L7	0	0	0	0	0	0	0	0	1	0	0
A0A087WVM4;B7ZM99	0	0	0.225256	0.391516	0	0	0	0.383228	0	0	0
A0A087WVP7;P0C024;P0C024-2	0	0	0	1	0	0	0	0	0	0	0
A0A087WVQ6;Q00610;Q00610-2	0	0	0	0	0	1	0	0	0	0	0
A0A087WVS8;Q70IA6;Q70IA6-3	0	0	0	0	0	0	1	0	0	0	0
A0A087WVT6;A0A087X159;D6RAC5;P81877;P81877-2;P81877-3;P81877-4;P81877-5;Q9BWW4;Q9BWW4-2;Q9BWW4-3	0	0	0	0	0	0.462357	0	0	0.537643	0	0
A0A087WVT8;A0A087X1L3;Q6ZWJ8	0	0	0	0.421249	0	0	0	0	0	0.255876	0.322875
A0A087WVX4;P49895;P49895-2;P49895-4	0	0	0.27507	0	0.72493	0	0	0	0	0	0
A0A087WVX5;A0A1B0GTA9;A0A1B0GTF6;A0A1B0GTN8;A0A1B0GTP5;A0A1B0GTS4;A0A1B0GTX2;A0A1B0GU53;A0A1B0GUI8;A0A1B0GUK4;A0A1B0GVB2;A0A1B0GWF9;A0A1C7CYX2;A0A2R8Y555;A0A2U3TZM7;A0A494C0B2;A0A494C0Z9;A0A494C184;E7EN11;F8VNV8;F8VU10;F8VUW8;H0Y476;O00305;O00305-2;O00305-3;O00305-4;P54284;P54284-2;P54284-3;P54284-4;P54284-5;Q02641;Q02641-2;Q02641-3;Q08289;Q08289-10;Q08289-2;Q08289-3;Q08289-4;Q08289-5;Q08289-6;Q0…	0	0	0	0	0.452546	0	0	0	0	0.296613	0.250841
A0A087WVZ7;A0A087X068;Q9UJW7;Q9UJW7-2	0	0	0	0	0	0	0	0	0.608536	0.391464	0
A0A087WVZ9;A0A0A0MQR7;P19388	0	0.489948	0	0	0	0	0	0	0	0	0.510052
A0A087WW06;B0QYP5;Q96AY4	0.624762	0	0.375238	0	0	0	0	0	0	0	0
A0A087WW23;P20292	0	0.471669	0	0	0	0	0	0	0	0	0.528331
A0A087WW28	0.521147	0	0	0	0	0	0	0	0.478853	0	0
A0A087WW48;E7ET14;H0Y3N9;H0Y589;O75151;Q9UPP1;Q9UPP1-2;Q9UPP1-3;Q9UPP1-4;Q9UPP1-5	0.366472	0	0	0	0	0	0.633528	0	0	0	0
A0A087WW58;Q9C0D9	0	0.390755	0.276954	0	0	0	0	0	0	0	0.332291
A0A087WW59;Q7Z7L8	0	0	0	0	0	0	1	0	0	0	0
A0A087WW66;Q99460;Q99460-2	1	0	0	0	0	0	0	0	0	0	0
A0A087WW76;A0A1B0GTZ9;A0A1B0GV73;A0A452Q6Z5;H0Y468;Q5T5U3	0	0.628492	0	0	0	0	0	0.371508	0	0	0
A0A087WW77;Q15334	0	0	0	0	0	1	0	0	0	0	0
A0A087WWA3;O60333;O60333-2;O60333-4;Q4R9M9	0.353423	0	0	0	0	0	0.646577	0	0	0	0
A0A087WWA7;O14640;O14640-2;P54792;P54792-2	0	0	0	0	0	0	0	0	1	0	0
A0A087WWF6;F8W8R3;P49005
A0A087WWG5	0	0	0	0	1	0	0	0	0	0	0
A0A087WWH3;Q9NZM4;Q9NZM4-2	0	1	0	0	0	0	0	0	0	0	0
A0A087WWI0	0	0	0	0	0	0	1	0	0	0	0
A0A087WWM0;O43617	0.423302	0	0	0	0	0	0.576698	0	0	0	0
A0A087WWM4;H0YNJ6;Q9P2T1;Q9P2T1-2	0	0	0	0	0	0	1	0	0	0	0
A0A087WWM6;E7EQL6;O43272;O43272-1;O43272-2	0	0	0	0	0	0	0	1	0	0	0
A0A087WWP4;A0A494C001;A0A499FJY3;Q96T37;Q96T37-2;Q96T37-3;Q96T37-4	0	1	0	0	0	0	0	0	0	0	0
A0A087WWP5;Q12962	0	1	0	0	0	0	0	0	0	0	0
A0A087WWP8;A0A0C4DGT8;A0A0C4DH79;Q5VWQ0;Q5VWQ0-4	0	0	0	0	0	0	0	0.552389	0	0	0.447611
A0A087WWQ2;Q92979;V9GYP5	0	1	0	0	0	0	0	0	0	0	0
A0A087WWR2;H3BQI4;H3BQS2;I3L2Z5;P56270;P56270-2;P56270-3;P56270-4	0	0	0	0	0	0.336098	0	0	0.663902	0	0
A0A087WWS1;Q96FV9	0	0.541559	0	0	0	0	0	0	0	0	0.458441
A0A087WWT7;A0A1W2PRP3;Q7Z7M1	0	0	0	0	0	0.340868	0	0	0.408164	0.250969	0
A0A087WWU8	0.558817	0	0	0	0	0	0	0	0.441183	0	0
A0A087WWW9;O95999	0	0	0	0	0	0	1	0	0	0	0
A0A087WWY0;P08519	0	0	1	0	0	0	0	0	0	0	0
A0A087WX02;F8WB74;M0QYX1;P63302	0	0	1	0	0	0	0	0	0	0	0
A0A087WX10;G3V4M2;G3V5E8;P54803	0	0	0	0	0	0	0	1	0	0	0
A0A087WX11;J3KNG8;Q8TF40;Q8TF40-3	0.587971	0	0	0	0	0	0	0	0.412029	0	0
A0A087WX19;A0A087WX45;C9J5R6	0	0	0	0	0	0	0	1	0	0	0
A0A087WX80;A0A087WYF1;P24043	0	1	0	0	0	0	0	0	0	0	0
A0A087WX97;Q9BXK5	0	0	0	1	0	0	0	0	0	0	0
A0A087WX99;A0A0G2JRA4;P55283;P55283-2	0	0	0	0	0	0	0	0	0	0.550449	0.449551
A0A087WXB0;O15126	0	0	0	0	0	1	0	0	0	0	0
A0A087WXB8;C9J0E2;C9J480;C9JWJ3;C9JXM2;Q9Y274	0	0	0	0	0	0	0	0	1	0	0
A0A087WXC5;E7ESZ7;O95299	0	0	0	0	0	0	0	1	0	0	0
A0A087WXD1;Q96T83	0	0	0	0	0	0.455385	0	0	0.544615	0	0
A0A087WXI2;Q9Y6R7	0	0	0	0.412174	0	0	0	0.341879	0	0.245946	0
A0A087WXI5;P12830;P12830-2	0	0	0	0	0	0	0	0	0	0	1
A0A087WXK4;Q7Z3F1	0	0	0	0	1	0	0	0	0	0	0
A0A087WXL6;B7Z879;Q9H270	0	0	0	0	0	1	0	0	0	0	0
A0A087WXM6;A0A0A6YYL6;J3KRX5;J3QQT2;P18621;P18621-3	0	0	0	0	0.574491	0	0	0.425509	0	0	0
A0A087WXN9;Q765P7	0	0	0	0	0	0	1	0	0	0	0
A0A087WXS6;C9JBF1	0	0	1	0	0	0	0	0	0	0	0
A0A087WXU0;A0A2R8Y4J4;Q9NWS8;Q9NWS8-2	0	0	0	0	0	0	0	1	0	0	0
A0A087WXV4;P41235;P41235-2;P41235-4;P41235-5;P41235-6	0	1	0	0	0	0	0	0	0	0	0
A0A087WXW3;Q9Y3P8	0	0	0.726197	0	0	0	0	0	0	0	0.273803
A0A087WXW6;A0A140TA70;A0A140TA74;A9JR48;Q9BXA9;Q9BXA9-2;Q9BXA9-3;Q9BXA9-4	0.487766	0.512234	0	0	0	0	0	0	0	0	0
A0A087WY00;F8W6H6;F8WE88;G3V394;Q9Y4I1;Q9Y4I1-2;Q9Y4I1-3	0	0.274955	0	0	0	0	0	0.209861	0	0.271474	0.24371
A0A087WY55;Q9NP79	0	0	0	0	0	0	1	0	0	0	0
A0A087WY67;P0CG29;P0CG30;Q6ICJ4	0	0	0	0	0	0	1	0	0	0	0
A0A087WY71;Q96CW1;Q96CW1-2	0	0	0	0.575931	0	0	0	0	0	0	0.424069
A0A087WY85;A0A0A0MQU3;D6RAH7;D6RFM0;H9KV45;P61077;P61077-2;P61077-3;P62837;P62837-2	0.56257	0	0	0	0	0.43743	0	0	0	0	0
A0A087WYD6;A0A0G2JLV0;Q03519;X5CMH5	0	0	0.336787	0	0.663213	0	0	0	0	0	0
A0A087WYF7;Q6UXV4	0	0	0	0	0	0	0	1	0	0	0
A0A087WYJ2;M0QZR8;M0R2B7;P28340
A0A087WYL3;Q17R60	0	0	0	0	0	0	0	0.720024	0	0.279976	0
A0A087WYL6;A0A087WZG6;A0A087X1S9;Q8TEW8;Q8TEW8-2;Q8TEW8-3;Q8TEW8-5;Q8TEW8-6;R4GN62	0	0	0	0	0	0	0	0	0	0.568098	0.431902
A0A087WYM3;A0A0A0MRF5;E7EWX6;Q8IXJ6;Q8IXJ6-2;Q8IXJ6-3;Q8IXJ6-4
A0A087WYN9;Q7Z478	0	0	1	0	0	0	0	0	0	0	0
A0A087WYP2;Q8IZQ5	0	0	0	0	0	0	1	0	0	0	0
A0A087WYR0;P09132	0	0	0	0	1	0	0	0	0	0	0
A0A087WYS3;Q9ULU4;Q9ULU4-10;Q9ULU4-11;Q9ULU4-12;Q9ULU4-13;Q9ULU4-19;Q9ULU4-22;Q9ULU4-7;Q9ULU4-8;Q9ULU4-9	0	0	0	0	0	0	1	0	0	0	0
A0A087WYT3;Q15185;Q15185-4	1	0	0	0	0	0	0	0	0	0	0
A0A087WYV9;A0A087X1F5;P57105	0	0	0	0	0	0	0	1	0	0	0
A0A087WYX8;A0A1W2PQW0;A0A590UJL7;A0A5F9ZH12;A0A5F9ZHT2;A0A6Q8PH73;Q14CM0	0	0	0.193306	0	0	0	0	0	0.241785	0.29166	0.273249
A0A087WYY0;A0A087X260;B1AKP7;G3V162;Q13148	0	1	0	0	0	0	0	0	0	0	0
A0A087WZ13;E9PAU2;Q8IY67;Q8IY67-2	0	0	0	0	0	0	1	0	0	0	0
A0A087WZ32;A8K727;Q9HB19	0	0	0	0	0	0	1	0	0	0	0
A0A087WZ40;Q14244;Q14244-6;Q14244-7	0	0	0	0	0	0	1	0	0	0	0
A0A087WZ50;Q8TCT7;Q8TCT7-2;Q8TCT7-4	0.67334	0.32666	0	0	0	0	0	0	0	0	0
A0A087WZ62;Q9H6U8;Q9H6U8-3	0	0	0.222049	0	0.418777	0	0	0	0.359175	0	0
A0A087WZ97;A0A087WZK6;A0A087X2C2;Q5T7M9	0	0	0	0	0	0.274242	0	0	0.725758	0	0
A0A087WZB5	0	1	0	0	0	0	0	0	0	0	0
A0A087WZC2;A0A0C4DGS8;E0YMJ8;P35680;P35680-2;P35680-3;P35680-4	0	0.408462	0	0	0	0	0	0	0	0.320142	0.271396
A0A087WZE9	0	0.7751	0.2249	0	0	0	0	0	0	0	0
A0A087WZG4;A0A3B3IPE9;A0A590UK10;Q6ZSZ5;Q6ZSZ5-1;Q6ZSZ5-2;Q6ZSZ5-5;Q6ZSZ5-6	0	0	0.24414	0	0	0	0.75586	0	0	0	0
A0A087WZK9;B3KS98;O15372	0.64479	0	0	0	0	0.35521	0	0	0	0	0
A0A087WZM2;D6REQ6;D6RHI9;O00584	0	0	0	0	0	0	0	0	0	1	0
A0A087WZM8;Q8TBM7;Q8TBM7-2;Q8TBM7-3	0	0	0	0	0.497233	0	0	0	0.502767	0	0
A0A087WZN1;O43837	0	0	0	0	0	0	0	1	0	0	0
A0A087WZP9	0	0	0	0	1	0	0	0	0	0	0
A0A087WZQ7;Q9H115	0	0	0	0	0	0	0	0	1	0	0
A0A087WZT0;M0QY61;M0QZ22;M0R0X3;Q5PRF9	0	0	0	0	0	0.389464	0	0	0.610536	0	0
A0A087WZT2;Q6UX53	0	0	0.394364	0	0.605636	0	0	0	0	0	0
A0A087WZT3;Q9H3K6	0.588374	0	0	0	0	0	0	0	0	0	0.411626
A0A087WZU2;E5RGN0;Q00536;Q00536-2;Q00536-3	0	0	0	0	0	0	1	0	0	0	0
A0A087WZU5;O43657
A0A087WZV0;O43314	0	1	0	0	0	0	0	0	0	0	0
A0A087WZY5;A8MXH5;F5H3Q5;F5H851;Q14031;Q14031-2	0	0	0	0	1	0	0	0	0	0	0
A0A087X011;E9PES4;J3KPF9;Q9Y496	0.633789	0	0	0	0	0.366211	0	0	0	0	0
A0A087X020;Q9Y3A5
A0A087X080;A0A0U1RRH1;A0A0X1KG73;Q15413;Q15413-2;Q15413-3	0	0	0.51516	0	0	0	0	0	0.48484	0	0
A0A087X091	0	0	0	0	0	0.373029	0	0	0.626971	0	0
A0A087X0D5;P09668	0	0	0	0.577296	0	0	0	0	0	0.422704	0
A0A087X0F1;Q9UK61;Q9UK61-2;Q9UK61-3;Q9UK61-4	0	1	0	0	0	0	0	0	0	0	0
A0A087X0H8;Q15714;Q15714-2;Q15714-3	0.649948	0.350052	0	0	0	0	0	0	0	0	0
A0A087X0H9;Q5T8P6	0	1	0	0	0	0	0	0	0	0	0
A0A087X0K0;P39059	0	1	0	0	0	0	0	0	0	0	0
A0A087X0K4;Q7Z408;Q7Z408-2;Q7Z408-4	0	1	0	0	0	0	0	0	0	0	0
A0A087X0K9	0	0.384905	0	0	0	0	0	0	0	0.294117	0.320978
A0A087X0L7;E7EVY0;J3KNA0;Q15070;Q15070-2	0	0	0	0	0	0	0	1	0	0	0
A0A087X0M4;Q9BWU0	0.652857	0.347143	0	0	0	0	0	0	0	0	0
A0A087X0P0	0	0.341531	0	0	0	0	0	0.658469	0	0	0
A0A087X0Q9;Q9BVL4
A0A087X0R6;Q9UMY4;Q9UMY4-1	0	0	0	0	0	0	1	0	0	0	0
A0A087X0R7;Q9H4L4	0	1	0	0	0	0	0	0	0	0	0
A0A087X0R9;B8ZZK1;Q07837;Q07837-2;Q07837-5;Q07837-6;Q07837-7	0	0	0.298479	0	0	0	0	0	0	0.378057	0.323464
A0A087X0S5;P12109	0	1	0	0	0	0	0	0	0	0	0
A0A087X0T5;Q96AB6	1	0	0	0	0	0	0	0	0	0	0
A0A087X0V5;P29728;P29728-2	0	0	1	0	0	0	0	0	0	0	0
A0A087X0W8;Q04206;Q04206-2;Q04206-3;Q04206-4;Q2TAM5	0	0	0	0	0	0	1	0	0	0	0
A0A087X0W9;Q8N6M0	0.733199	0	0	0	0	0.266801	0	0	0	0	0
A0A087X0X3;P52272;P52272-2	0	1	0	0	0	0	0	0	0	0	0
A0A087X0Y2;A0A087X248;A0A087X2I9;A0A096LPD8;F5GWV3;F5H3N7;F5H8B4;O14607;O14607-2;O14607-3;O14607-4;O14607-5	0	1	0	0	0	0	0	0	0	0	0
A0A087X108	0.351271	0	0	0	0	0	0.648729	0	0	0	0
A0A087X117;A0A0G2JN29;Q15155	0	0	0	0	0.674691	0	0	0.325309	0	0	0
A0A087X138;Q8TF71	0	0	0.282647	0	0	0	0	0	0	0.370762	0.346591
A0A087X1A8;A0A2R8Y3X7;D3VVH9;F5H211;G3V3R7;P54252;P54252-1;P54252-4	0	0	0	0	0	0	1	0	0	0	0
A0A087X1B2	0	1	0	0	0	0	0	0	0	0	0
A0A087X1B6;E9PEG3;F5GZG9;P10275;P10275-3;P10275-4	0	0	0	0	0	0	1	0	0	0	0
A0A087X1E4;P53365;P53365-3	0.498509	0	0	0	0	0	0.501491	0	0	0	0
A0A087X1G1;H7BYD0;Q16718;Q16718-2	0	0	0	0	0	0	0	1	0	0	0
A0A087X1G4	0	0	0	0	0	0	0	0	0	1	0
A0A087X1J2	0	0	0	0	0	0	0	1	0	0	0
A0A087X1J7;P22352	0	0.383705	0	0	0	0	0	0.616295	0	0	0
A0A087X1K1;Q96C00	0	0	0.514562	0	0	0	0	0	0.485438	0	0
A0A087X1N3;F8WC38;O75818;O75818-2	0.701851	0	0	0	0	0	0	0	0	0	0.298149
A0A087X1N7;P20929;P20929-2;P20929-3;P20929-4	0	0	0	0	0	0	0	0	1	0	0
A0A087X1P3;C9IYE1;F8W8P5;H7BYR4;Q86UW7;Q86UW7-2;Q86UW7-3	0	0	0	0	0	0	0	0	1	0	0
A0A087X1P5;J3KQ41;J3QT95;Q9H9Q2;Q9H9Q2-3	0	1	0	0	0	0	0	0	0	0	0
A0A087X1R3;A0A0C4DGX0;A6QL64;Q8N2N9	0	0	0	0	0	0	1	0	0	0	0
A0A087X1S3	0	0	0	0	0	0.397674	0	0	0.602326	0	0
A0A087X1W8;A0A0A0MTJ8;Q9BY67;Q9BY67-3;Q9BY67-4;Q9BY67-5;X5DQS5	0	0	0	0	0	0	0	0	0	0	1
A0A087X1Z1;A0A0G2JPW5;A0A0G2JQX1;A0A0G2JSA7;Q96RT8;Q96RT8-2	0	0	1	0	0	0	0	0	0	0	0
A0A087X1Z3;Q9UL46	0.427249	0	0	0	0	0	0.572751	0	0	0	0
A0A087X236;A0A0A0MRE2;C9J2A8;Q9NVP4;Q9NVP4-2;Q9NVP4-3;Q9NVP4-4;Q9NVP4-5	0	0	0	0	0	0	0	0.55819	0	0	0.44181
A0A087X241;Q2NKQ1;Q2NKQ1-3;Q2NKQ1-4
A0A087X256;Q2M389	0	0	0	0	0	1	0	0	0	0	0
A0A087X266;Q9BXJ8	0	0	0	0	0	1	0	0	0	0	0
A0A087X279;P09913	0	0	0	0	0	0	1	0	0	0	0
A0A087X294;O75914;O75914-2;O75914-3;O75914-4	0	0	0	0	0	0	1	0	0	0	0
A0A087X295;E9PDU5;Q9NNW5	0	0	0	0	0	0	1	0	0	0	0
A0A087X296;P23219;P23219-2;P23219-3;P23219-4;P23219-5;P23219-6	0	0	0	0	0	0	0	0.660015	0	0	0.339985
A0A087X2A7;H0YBA5;H7BY63;Q8NB25;Q8NB25-2;Q8NB25-3;Q8NB25-4	0	0	0	0	0	0	0	0	0.645709	0.354291	0
A0A087X2B5;P35613;P35613-2	0	0	0	0	0	0	0	0	0	0.44352	0.55648
A0A087X2D5;Q9BRJ2	0	0.436415	0	0	0	0	0	0.563585	0	0	0
A0A087X2D8;O60271-2;O60271-4	0	0	0	0	0	0	1	0	0	0	0
A0A087X2G6;A0A0C4DGU5;D6RIC3;Q9Y3C1;Q9Y3C1-2;Q9Y3C1-3	0	1	0	0	0	0	0	0	0	0	0
A0A087X2I1;P62333	1	0	0	0	0	0	0	0	0	0	0
A0A088AWN3;A0A0A0MSY4;Q9BZ29;Q9BZ29-3;Q9BZ29-4;Q9BZ29-5	0	0	0	0.413003	0	0	0	0.586997	0	0	0
A0A088AWN8;E7EP87;E9PH27;J3KS48;J3KT43;J3QRB0;Q9UHQ1;Q9UHQ1-2;Q9UHQ1-3;Q9UHQ1-4	0	0	0.361558	0	0	0	0.638442	0	0	0	0
A0A090HNM7;A0A1W2PS85;P28715;R4GMW8	0	0.495966	0	0	0	0.504034	0	0	0	0	0
A0A096LNH6;Q14185	0	1	0	0	0	0	0	0	0	0	0
A0A096LNV3;A0A096LP02;Q9Y508;Q9Y508-2	0	0	0.256509	0	0	0	0	0	0.743491	0	0
A0A096LP07;A0A096LPJ3;A8K070
A0A096LP22;A0A096LP34;C9J7Z1;Q86Y79	0	0.676462	0	0	0	0	0	0.323538	0	0	0
A0A096LP69	0	0	0	0	0	0	0	0	0	0.45166	0.54834
A0A096LPC5;A0A0A0MR88;Q9Y4E1;Q9Y4E1-1;Q9Y4E1-2;Q9Y4E1-6	0	0	0	0	0	0	0	0	1	0	0
A0A096LPE2	0	0	0.386906	0	0.613094	0	0	0	0	0	0
A0A096LPI6	0	0	0	0	0	0	0	1	0	0	0
A0A096LPJ4;P05161	0	0	0	0	0	0	1	0	0	0	0
A0A096LPJ9;A0A140G945;A0A140G945-2;E7EWH7;P02489	1	0	0	0	0	0	0	0	0	0	0
A0A0A0MQR2;Q9BY42	0	0	0	0	0	0	1	0	0	0	0
A0A0A0MQR4;I3L2J0;Q96RK0	0	1	0	0	0	0	0	0	0	0	0
A0A0A0MQS1;Q53H96;Q53H96-2	0	0	1	0	0	0	0	0	0	0	0
A0A0A0MQS9;A0A0A0MTC7;Q16363;Q16363-2	0	0.249322	0	0	0	0	0	0.55758	0	0	0.193098
A0A0A0MQT0;P09455	0	0	0	0	0	0	1	0	0	0	0
A0A0A0MQU0;Q9BV38;U3KQC1	0	1	0	0	0	0	0	0	0	0	0
A0A0A0MQU4;Q96I15	0	0	0	0	0	0	1	0	0	0	0
A0A0A0MQU7;A0A0A0MTK8;F5H0K0;P20823;P20823-2;P20823-3;P20823-7;U3KQS6	0	1	0	0	0	0	0	0	0	0	0
A0A0A0MQV6;P09038;P09038-1;P09038-2;P09038-3	0	1	0	0	0	0	0	0	0	0	0
A0A0A0MQX1;D6RGD1;Q9HD67	0	0.330328	0	0	0	0	0	0	0	0.359594	0.310078
A0A0A0MQX8;C9JP00;Q9NR56;Q9NR56-2;Q9NR56-5;Q9NR56-6;Q9NR56-7	0	1	0	0	0	0	0	0	0	0	0
A0A0A0MQY7;A0A3B3ISH2;Q5VU97
A0A0A0MR02;P45880;P45880-1;P45880-2	0	0	0	0	0	0	0	1	0	0	0
A0A0A0MR03;A0A0J9YWB6;A0A0J9YWJ4;K7EJD2;Q9Y5B0;Q9Y5B0-4	0	0	0	0	0	0	1	0	0	0	0
A0A0A0MR05;H3BM50;H3BN58;H3BPT1;H3BPU5;Q9BVC4;Q9BVC4-4;Q9BVC4-5	0	0	0	0	0	0	0	0	0	1	0
A0A0A0MR07;F5H5P4;P15498;P15498-2;Q96D37	0.449054	0	0	0	0	0	0.550946	0	0	0	0
A0A0A0MR09;P43378	0	0.282623	0.273419	0.443958	0	0	0	0	0	0	0
A0A0A0MR11;A0A0A0MRS1;Q06730;Q06730-2;Q06730-3	0	0	0	0	0	0	0	0	0	0.558499	0.441501
A0A0A0MR25;A0A5S6RJB7;D2CGD1;E7EVR7;H7BXU9;H7C265;P21802;P21802-15;P21802-16;P21802-17;P21802-18;P21802-2;P21802-20;P21802-21;P21802-22;P21802-23;P21802-3;P21802-4;P21802-5;P21802-6;P21802-8;S4R381	0	0	0	0	0	0.397551	0	0	0.602449	0	0
A0A0A0MR36;Q9ULV0-2
A0A0A0MR51;H7C2V0;O60427	0	0	0	0	0.650778	0	0	0.349222	0	0	0
A0A0A0MR67;A0A0A0MSA1;E9PDI6;F5GY28;F5H522;Q13936;Q13936-10;Q13936-11;Q13936-12;Q13936-13;Q13936-14;Q13936-15;Q13936-16;Q13936-17;Q13936-18;Q13936-19;Q13936-2;Q13936-20;Q13936-21;Q13936-22;Q13936-23;Q13936-24;Q13936-25;Q13936-26;Q13936-27;Q13936-28;Q13936-29;Q13936-3;Q13936-30;Q13936-31;Q13936-32;Q13936-33;Q13936-34;Q13936-35;Q13936-36;Q13936-37;Q13936-4;Q13936-5;Q13936-6;Q13936-7;Q13936-8;Q13936…	0	0	1	0	0	0	0	0	0	0	0
A0A0A0MR74;O75907	0	0	0	0	0.649497	0	0	0	0	0.350503	0
A0A0A0MRA5;B7Z4B8;M0R3F1;Q9BUJ2;Q9BUJ2-2;Q9BUJ2-4	0	1	0	0	0	0	0	0	0	0	0
A0A0A0MRA8;A8K968;Q9Y2J2;Q9Y2J2-2	0	0	0	0.615725	0	0	0	0	0	0	0.384275
A0A0A0MRB5;Q8WXG6;Q8WXG6-2;Q8WXG6-3;Q8WXG6-4;Q8WXG6-5;Q8WXG6-6;Q8WXG6-7;Q8WXG6-8	0.419672	0	0	0	0	0	0.580328	0	0	0	0
A0A0A0MRD0;A0A2R8YCE3;F5H4B4;F5H4B4-2	0	0	1	0	0	0	0	0	0	0	0
A0A0A0MRE5;Q9ULH1;Q9ULH1-2
A0A0A0MRF6;Q99996;Q99996-1;Q99996-3;Q99996-5;Q99996-6
A0A0A0MRF9;P16885	0	0	0	0	0	0	1	0	0	0	0
A0A0A0MRG8;Q16611	0	0	0	0.512158	0	0	0	0.487842	0	0	0
A0A0A0MRH3;Q9Y2W7;Q9Y2W7-2;Q9Y2W7-3	0	0.467061	0	0.532939	0	0	0	0	0	0	0
A0A0A0MRI1;Q8IXQ4	0	0	0	0.366972	0	0	0	0.633028	0	0	0
A0A0A0MRI2;Q9UNH7	0.414096	0	0	0	0	0	0.585904	0	0	0	0
A0A0A0MRJ0;Q5VT25;Q5VT25-2;Q5VT25-3;Q5VT25-4;Q5VT25-5;Q5VT25-6	0	0.28202	0.229789	0	0	0	0	0	0	0.220982	0.267209
A0A0A0MRJ6	0	0	0	0	0	0	1	0	0	0	0
A0A0A0MRJ7;P12259	0	0	0.318821	0	0.681179	0	0	0	0	0	0
A0A0A0MRM2;Q86VF7;Q86VF7-2;Q86VF7-3;Q86VF7-4	0	0	0	0	0	0.480908	0	0	0.519092	0	0
A0A0A0MRM9;Q14978;Q14978-2;Q14978-3	0	1	0	0	0	0	0	0	0	0	0
A0A0A0MRP6;B7ZLQ5;P28370;P28370-2	0	0.704092	0	0	0	0	0	0	0	0	0.295908
A0A0A0MRR7;P09234	0	1	0	0	0	0	0	0	0	0	0
A0A0A0MRT2;Q9BTA9;Q9BTA9-2;Q9BTA9-5	0	0	0	0	0	0.583	0	0	0	0.417	0
A0A0A0MRT6;Q8IZP0;Q8IZP0-2;Q8IZP0-3;Q8IZP0-4;Q8IZP0-5;Q8IZP0-6;Q8IZP0-9
A0A0A0MRW6;Q9H6R4;Q9H6R4-2;Q9H6R4-4	0	0.725645	0	0	0	0	0	0	0	0	0.274355
A0A0A0MRX1;A0A0R4J2E6;A0A494C0F8;A0A494C147;A0A494C1D9;B1APY9;P26378;P26378-1;P26378-2;P26378-3;P26378-4;P26378-5;Q12926;Q12926-2
A0A0A0MRX8;A0A1B0GWI9;A0A1B0GWJ4;A0A2R8Y7V8;O00712;O00712-4;O00712-5;Q5VW26;Q5VW27;Q5VW30;U3KQE8	0	1	0	0	0	0	0	0	0	0	0
A0A0A0MRY0;B0QYI1;Q8WUA7;Q8WUA7-2;Q8WUA7-3;Q8WUA7-4	0	0	0	0	0	0	1	0	0	0	0
A0A0A0MRZ1;Q9H9P5-1;Q9H9P5-3	0	0	0	0	0	1	0	0	0	0	0
A0A0A0MRZ4;E7EMV7;Q15025;Q15025-2;Q15025-3;Q15025-4;Q15025-5;Q15025-6;Q15025-7;Q15025-8
A0A0A0MS14	0	0	1	0	0	0	0	0	0	0	0
A0A0A0MS59;A0A0C4DFX4;Q6ZRS2;Q6ZRS2-2;Q6ZRS2-3	0	1	0	0	0	0	0	0	0	0	0
A0A0A0MS79;O14513	0.584415	0	0	0	0	0.415585	0	0	0	0	0
A0A0A0MS87	0	0	0	0	0	0	1	0	0	0	0
A0A0A0MS99;I3L4X2;P33527;P33527-2;P33527-3;P33527-5;P33527-9	0	0.54881	0	0	0	0	0	0	0	0.223038	0.228153
A0A0A0MSA9;A0A0C4DG49;P15151;P15151-2;P15151-3;P15151-4	0	0	0.2657	0	0	0	0	0	0.248839	0.208908	0.276554
A0A0A0MSB4;Q6ZN50;Q969R2;Q969R2-2;Q969R2-3;Q969R2-6	0	0.426963	0	0	0	0	0	0	0.573037	0	0
A0A0A0MSB8;Q9UPT5;Q9UPT5-1;Q9UPT5-2;Q9UPT5-5;Q9UPT5-6
A0A0A0MSE3;D3DNG8;P30556	0	0	0	0	0	0	0	0	0	0.506961	0.493039
A0A0A0MSG0;A6NGB9	0	0	1	0	0	0	0	0	0	0	0
A0A0A0MSH9;A0A494C1F7;A0A494C1P7;Q86WJ1;Q86WJ1-2;Q86WJ1-4	0	0.645273	0.354727	0	0	0	0	0	0	0	0
A0A0A0MSI2;B3KPJ4;Q8IXK0;Q8IXK0-2;Q8IXK0-3;Q8IXK0-4;Q8IXK0-5	0	0	0	0	0	0	1	0	0	0	0
A0A0A0MSI6;B7Z1P2;Q9H4M3;Q9H4M3-2	0.339945	0.200752	0.459304	0	0	0	0	0	0	0	0
A0A0A0MSI8;O00471
A0A0A0MSJ9;Q15283;Q15283-2	0	0	0.517785	0	0	0	0	0	0	0.482215	0
A0A0A0MSK3;A0A0C4DH47;A0A498U6I9;C9JS68;P24557;P24557-2;P24557-3;P24557-4;Q53F23	0	1	0	0	0	0	0	0	0	0	0
A0A0A0MSK6;Q13017;Q13017-2
A0A0A0MSL1;Q8TDM6;Q8TDM6-2;Q8TDM6-3;Q8TDM6-4	0	0.344938	0	0	0	0	0	0.269627	0	0	0.385435
A0A0A0MSM0	0	0	0	0	0	0	0	0	1	0	0
A0A0A0MSP4;Q86WC4	0	0	0.598762	0	0	0	0	0	0	0.401238	0
A0A0A0MSQ0;P13797;P13797-2
A0A0A0MSS0;P60880	0	0	0	0	0.507601	0	0	0	0	0.231387	0.261012
A0A0A0MSS8;P42330	0	0	0	0	0	0	1	0	0	0	0
A0A0A0MST8;C9JRP1;E9PFN4;Q9Y6M7;Q9Y6M7-12;Q9Y6M7-13;Q9Y6M7-2;Q9Y6M7-6;Q9Y6M7-7;Q9Y6M7-8;Q9Y6M7-9	0	0	0	0	0	0	0	0	0	0.48737	0.51263
A0A0A0MSU4;O94911-3	0	0	0.582652	0	0	0	0	0	0	0	0.417348
A0A0A0MSV9;A0A0G2JH37;A0A0G2JKZ1;A2AB90;O15533;O15533-2;O15533-3	0	0	0	0	1	0	0	0	0	0	0
A0A0A0MSW2;E9PEI2;Q9BQW3;Q9BQW3-1	0	0	0	0	0	0	0	0.431607	0	0	0.568393
A0A0A0MSX9;P41252	1	0	0	0	0	0	0	0	0	0	0
A0A0A0MSY7;O00142;O00142-4;O00142-6	0	0	0	0	0	0	0	1	0	0	0
A0A0A0MSZ9;Q05048	0	1	0	0	0	0	0	0	0	0	0
A0A0A0MT02;A2ABK4;P18615;P18615-3	0	0	0	0	0	1	0	0	0	0	0
A0A0A0MT16;Q86UQ4;Q86UQ4-3;Q86UQ4-4	0	0	0	0	0	0	0	0	0	0.573265	0.426735
A0A0A0MT32;P38571;P38571-2
A0A0A0MT35;A0A2P0CTB1;Q8TBF2;Q8TBF2-3	0	0	0	1	0	0	0	0	0	0	0
A0A0A0MT61;G5E979;H7BYM2;Q8WYN0;Q8WYN0-3;Q8WYN0-5	0	0	0	1	0	0	0	0	0	0	0
A0A0A0MT72;C9JUH3;Q9BSQ5;Q9BSQ5-2;Q9BSQ5-3	0.720385	0	0	0	0	0.279615	0	0	0	0	0
A0A0A0MT83;P26440	0	0	0	0	0	0	0	1	0	0	0
A0A0A0MT93	0	0	0	0	0	0	0	0	0.575199	0	0.424801
A0A0A0MTC2;D6RA37;D6RDV0;D6RIY7;Q13454;Q13454-2	0	0	0	0	0.618019	0	0	0.381981	0	0	0
A0A0A0MTG5;P13232;P13232-2;Q5FBX5	0	0	0.460761	0	0	0	0	0	0.539239	0	0
A0A0A0MTH3
A0A0A0MTH9;O14981	0.511368	0.488632	0	0	0	0	0	0	0	0	0
A0A0A0MTJ9;Q6PIU2;Q6PIU2-2	0	0	0	0	0.704486	0	0	0.295514	0	0	0
A0A0A0MTK0;A0A0A0MTP0;F5GWB1;Q7Z6B0;Q7Z6B0-2	0.371492	0	0	0	0	0	0.628508	0	0	0	0
A0A0A0MTL6;Q6ZS17;Q6ZS17-2;Q6ZS17-3;Q6ZS17-4	0	0	0.244136	0	0	0	0.755864	0	0	0	0
A0A0A0MTL7;A0A0D9SGH8;C6ZRJ6;C6ZRJ7;C6ZRK5;E2GH26;Q5JRY3;Q5JRY4;Q5JRY5;Q5VVR7;Q9NQB0;Q9NQB0-10;Q9NQB0-11;Q9NQB0-12;Q9NQB0-13;Q9NQB0-14;Q9NQB0-15;Q9NQB0-16;Q9NQB0-17;Q9NQB0-2;Q9NQB0-3;Q9NQB0-4;Q9NQB0-5;Q9NQB0-6;Q9NQB0-7;Q9NQB0-8;Q9NQB0-9	0	0.580899	0	0	0	0	0	0	0	0	0.419101
A0A0A0MTN0;Q13617;Q13617-2	0.319842	0	0	0	0	0	0.680158	0	0	0	0
A0A0A0MTN3	0	0	1	0	0	0	0	0	0	0	0
A0A0A0MTP7;F8VXG7;Q99590;Q99590-2	0.586566	0.413434	0	0	0	0	0	0	0	0	0
A0A0A0MTQ3;Q96N23;Q96N23-2	0	0	0.440307	0	0	0	0	0	0.559693	0	0
A0A0A0MTQ8;P0C221	0	0.418299	0	0	0	0	0	0	0	0.32522	0.256481
A0A0A0MTR7;Q63HN8	0.616522	0	0	0	0	0.383478	0	0	0	0	0
A0A0A0MTS7;Q8WZ42;Q8WZ42-12;Q8WZ42-13;Q8WZ42-2;Q8WZ42-8	0	0	0	0	0	0	0	1	0	0	0
A0A0A0MTS9;K7EKZ0;K7EP24;K7ER94;Q2V2M9;Q2V2M9-2;Q2V2M9-3;Q2V2M9-4	0	0	0	0	0	0	0	0	0.586659	0.413341	0
A0A0A0MTU3;Q4ZIN3;Q4ZIN3-2	0	0	0	0	1	0	0	0	0	0	0
A0A0A6YYA0;Q86XR7-2;Q9Y3B3;Q9Y3B3-2	0	0	0	0	0.520111	0	0	0	0.479889	0	0
A0A0A6YYC0;E9PJN1;O75676;O75676-2	1	0	0	0	0	0	0	0	0	0	0
A0A0A6YYC7;Q96JP5;Q96JP5-2	0.699294	0.300706	0	0	0	0	0	0	0	0	0
A0A0A6YYG9;F8WCF6;F8WDD7;P59998;P59998-2;P59998-3	0	0	0	0	0	0	1	0	0	0	0
A0A0A6YYH1;Q7Z6K5;Q7Z6K5-2	0	0	0	0	0	0	1	0	0	0	0
A0A0A6YYI3;A0A0B4J1V8;A8MV53;Q9NQ55;Q9NQ55-2;Q9NQ55-3	0	1	0	0	0	0	0	0	0	0	0
A0A0A6YYL2;P0DMM9;P0DMM9-3;P0DMN0	0	0	0	0	0	0	1	0	0	0	0
A0A0A6YYL4;P57737-3	0	0	0	1	0	0	0	0	0	0	0
A0A0B4J1R2;Q9H6R3	0	0	0	0	0	0	0	1	0	0	0
A0A0B4J1R4;P32754	0	0	0	0	0	0	1	0	0	0	0
A0A0B4J1R7;Q96B45
A0A0B4J1S8;Q9UBF8;Q9UBF8-2;Q9UBF8-3	0	0	0	0	0	0	1	0	0	0	0
A0A0B4J1W0;B9TX62;F5GY88;H0YEG1;O75448;O75448-2	0	1	0	0	0	0	0	0	0	0	0
A0A0B4J1Y2;Q8NDW8;Q8NDW8-3;Q8NDW8-5;Q8NDW8-6;Q8NDW8-7	0	0	0	0	0	0	0	1	0	0	0
A0A0B4J1Z1;C9JAB2;Q16629;Q16629-2;Q16629-3;Q16629-4	0	1	0	0	0	0	0	0	0	0	0
A0A0B4J269	0.388737	0	0	0	0	0	0.611263	0	0	0	0
A0A0B4J291;Q8N8U2	0	0	0.294849	0	0	0	0.705151	0	0	0	0
A0A0B4J294;H3BP13;Q9UL33;Q9UL33-2	0	0	0	0	0	0	1	0	0	0	0
A0A0B4J297;I3L4V0;Q9BRA0;Q9BRA0-2	0	0	0	0	1	0	0	0	0	0	0
A0A0B4J2A0	0	0	0	0	0	0	1	0	0	0	0
A0A0B4J2C2;F8WF49;Q9Y2H0;Q9Y2H0-1;Q9Y2H0-3	0	0	0	0	0	0	1	0	0	0	0
A0A0B4J2C3;J3KPG2;P13693;Q5W0H4	0	0	0	0	0	1	0	0	0	0	0
A0A0B4J2D5;P0DPI2	0	0	0	0	0	0	0	1	0	0	0
A0A0B4J2E5;Q15269	0	1	0	0	0	0	0	0	0	0	0
A0A0B4J2F0	0	0	0	0	0	0	0	1	0	0	0
A0A0B4J2F8;E2QRJ6;F6S314;P52435	0	1	0	0	0	0	0	0	0	0	0
A0A0B4J2G4;Q15345;Q15345-3	0.397895	0	0	0	0	0	0.602105	0	0	0	0
A0A0C3SFZ9;M0QXD1;M0QY09;M0QZE1;M0QZI3;M0R1K4;M0R3E5;O14526;O14526-2;O14526-3	0.596854	0	0	0	0	0	0	0	0.403146	0	0
A0A0C4DFL7;Q16850	0	0	0	0	1	0	0	0	0	0	0
A0A0C4DFL8;F5GX28;O94953	0	1	0	0	0	0	0	0	0	0	0
A0A0C4DFM1;Q92544	0	0	0	0	0	0.36849	0	0	0.63151	0	0
A0A0C4DFM7;Q5TAX3	1	0	0	0	0	0	0	0	0	0	0
A0A0C4DFP6;Q5T4F6;Q9NQ79;Q9NQ79-2;Q9NQ79-3	0	0	0	0.298031	0	0	0	0.701969	0	0	0
A0A0C4DFR1;O75069;O75069-2;O75069-3;O75069-5
A0A0C4DFU4;Q9HBG7-4
A0A0C4DFV0;Q9H469	0	0	0	0	0	1	0	0	0	0	0
A0A0C4DFW4;Q5JUR7	0	1	0	0	0	0	0	0	0	0	0
A0A0C4DFX2;A0A286YFA9;A0A2R8Y5V8;A0A2R8YCY2;Q5TBA9	0.52736	0	0	0	0	0.47264	0	0	0	0	0
A0A0C4DFX6;A0A0C4DGG6;Q9UHC9;Q9UHC9-2;Q9UHC9-3;Q9UHC9-4	0	0.207916	0.196502	0	0	0	0	0	0	0.293564	0.302018
A0A0C4DFX9;Q9H3P2	0	1	0	0	0	0	0	0	0	0	0
A0A0C4DFY5;A8MXZ4;J9JIE0;Q9NQ84;Q9NQ84-2	0	0	0.21572	0	0.478644	0	0	0	0	0.305636	0
A0A0C4DFY7;Q6UWW8;Q6UWW8-2	0	0	0.182143	0	0	0	0	0	0.246683	0.231139	0.340035
A0A0C4DFZ2;P15289;P15289-2	0	0	0	0.519548	0	0	0	0.480452	0	0	0
A0A0C4DG02;F8WE91;Q9Y6K1;Q9Y6K1-2	0	1	0	0	0	0	0	0	0	0	0
A0A0C4DG17;C9J9K3;P08865	0	0	0	0	1	0	0	0	0	0	0
A0A0C4DG21;A0A7D9NKC8;E7EP65;E7EW77;E9PEZ7;F8WAL6;Q9NYB9;Q9NYB9-2;Q9NYB9-4	0	0	0	0	0	0	0	0	0.464562	0	0.535438
A0A0C4DG26;Q9NP71;Q9NP71-2;Q9NP71-3;Q9NP71-4;Q9NP71-6	0	0.216205	0	0	0	0	0.783795	0	0	0	0
A0A0C4DG40;Q8NF91;Q8NF91-4	0	0	0	1	0	0	0	0	0	0	0
A0A0C4DG51;Q9NP80;Q9NP80-3	0	0	0	0.453766	0	0	0	0.546234	0	0	0
A0A0C4DG62;F5GYV5;F8WCT1;H7BZV4;Q66PJ3;Q66PJ3-2;Q66PJ3-3;Q66PJ3-4;Q66PJ3-7	0	0.60934	0	0	0	0	0	0	0	0	0.39066
A0A0C4DG80;Q9P2N7;Q9P2N7-2;Q9P2N7-3;Q9P2N7-4;Q9P2N7-5
A0A0C4DG85;P40394;P40394-2	0	0	0	0	0	0	1	0	0	0	0
A0A0C4DG88;P14859;P14859-2;P14859-3;P14859-4;P14859-5;P14859-6	0	1	0	0	0	0	0	0	0	0	0
A0A0C4DG89;Q7L014	0	1	0	0	0	0	0	0	0	0	0
A0A0C4DG90;A4D0S4;A4D0S4-3	0	0.34063	0	0	0	0	0	0	0	0.280454	0.378917
A0A0C4DG91;A0A2R8Y7V2;C9J9V6;C9JQB1;O75414	0	0	0	0	0	0	0	1	0	0	0
A0A0C4DG95;C9IYJ2;E9PD56;F8WDF7;H7BYG4;Q7Z7A4;Q7Z7A4-2;Q7Z7A4-4;Q7Z7A4-6;W5RWE6	0	0.648613	0	0	0	0	0	0	0	0	0.351387
A0A0C4DGA2;O75521;O75521-2	0	0	0	0.271085	0	0	0	0.728915	0	0	0
A0A0C4DGA6;Q14527;Q14527-2	0	0.328819	0	0	0	0	0	0.253429	0	0.208444	0.209308
A0A0C4DGA7;O94929;O94929-3	0	0.32143	0	0	0	0	0	0	0	0.319283	0.359287
A0A0C4DGB0;Q9UIL1;Q9UIL1-2;Q9UIL1-3	1	0	0	0	0	0	0	0	0	0	0
A0A0C4DGB9	0	0	0	0	0	0	0	1	0	0	0
A0A0C4DGE4;A0A0J9YW33;A0A286YF28;Q13277;Q13277-2;Q13277-3	0	0	0	0	0	0	0	0	0	0.519404	0.480596
A0A0C4DGE7;Q86UK5;Q86UK5-2;Q86UK5-3	0.719132	0.280868	0	0	0	0	0	0	0	0	0
A0A0C4DGF7;Q6UXC1;Q6UXC1-2;Q6UXC1-3	0	0	0	0.313558	0	0	0	0.686442	0	0	0
A0A0C4DGG1;Q9UKS6	0	0	0	0	0	0	0	0	0	0.419543	0.580457
A0A0C4DGG9;A0A2R8Y212;A0A2R8Y425;A0A2R8Y521;A0A2R8Y5J0;A0A2R8YFK9;A0A2U3TZM0;F5GWX5;Q14839;Q14839-2	0	1	0	0	0	0	0	0	0	0	0
A0A0C4DGH0;Q5ZPR3;Q5ZPR3-3;Q5ZPR3-4	0	0	0	0	0.416772	0	0	0	0	0.274874	0.308353
A0A0C4DGH6;A0JNW5	0.623059	0.376941	0	0	0	0	0	0	0	0	0
A0A0C4DGI4	0	0	0	0	0	0	0	0.668863	0.331137	0	0
A0A0C4DGM9;B7Z896;F5H3M2;Q9BVG8;Q9BVG8-2;Q9BVG8-4;Q9BVG8-5;Q9BVG8-6	0	0.522033	0	0	0	0	0	0.477967	0	0	0
A0A0C4DGN6;J3QRU8;Q9Y2X7;Q9Y2X7-3	0	0	0	1	0	0	0	0	0	0	0
A0A0C4DGP0;E7EU35;Q9UKF7-2	0	0	0.347734	0	0	0	0.652266	0	0	0	0
A0A0C4DGQ4;Q86W25	1	0	0	0	0	0	0	0	0	0	0
A0A0C4DGQ5;P04632	0	0	0	0	0	0	1	0	0	0	0
A0A0C4DGQ8;Q6IAN0	0	0	0	0	1	0	0	0	0	0	0
A0A0C4DGR2;M0QY25;M0QYH7;M0QYQ4;M0QZQ2;Q71SY5;Q71SY5-4;Q71SY5-5;Q71SY5-6;Q86YD1;Q86YD1-2	0	1	0	0	0	0	0	0	0	0	0
A0A0C4DGS1;P39656;P39656-3	0	0	0	0	0	0	0	1	0	0	0
A0A0C4DGV4;E9PLX3;O43504;R4GMU8	0	0	0	0	1	0	0	0	0	0	0
A0A0C4DGZ4;Q9Y5U4	0	0	0	0	0	0	0	0	1	0	0
A0A0C4DH01;Q9NVU0;Q9NVU0-2;Q9NVU0-3;Q9NVU0-4;Q9NVU0-5	0.58551	0.201794	0	0	0	0.212696	0	0	0	0	0
A0A0C4DH13;E5RG96;J3KQJ9;Q8N2E2
A0A0C4DH16;B8ZZS0;H7BXT7;Q9NYM9	0	0	0	0	0	0	0	0	1	0	0
A0A0C4DH36	0	0	0	0	0	0.338045	0	0	0.355529	0.306426	0
A0A0D2X7Z3;Q49AN0;Q49AN0-2	0	0	1	0	0	0	0	0	0	0	0
A0A0D9SEI0;Q9P0P8	0	0	0	0	0	0	0	1	0	0	0
A0A0D9SEI3;A0A0D9SEN2;A0A0D9SER5;P21127;P21127-2;P21127-3;P21127-8	0	1	0	0	0	0	0	0	0	0	0
A0A0D9SEJ5;F5GY05;Q96EK7;Q96EK7-2	0	0	0	0	0	0	0	0.494746	0.505254	0	0
A0A0D9SEK1
A0A0D9SEN7;A0A2R8Y7Z3;I3L0L0;Q13950;Q13950-2;Q13950-3	0	0	0	0	0	0	0	0	0	1	0
A0A0D9SES8;H0YKN8;H0YKT5;H0YL70;H0YNI7;H0YNT2;Q04724;Q04726;Q04726-2;Q04726-3;Q04726-4;Q04726-5;Q04726-6;Q04726-7;Q04727;Q04727-2;Q04727-3;Q04727-4	0.564643	0	0	0	0	0	0	0	0.435357	0	0
A0A0D9SET2;A0A0D9SFD0;A0A0D9SGI5;A0A0R4J2G5;A0A1B0GTW4;A0A1B0GV32;D6R942;D6RB91;D6RC63;D6RCM6;D6RG14;D6RG21;D6RJA7;D6RJG6;D8L7E9;H0YM62;Q02078;Q02078-2;Q02078-3;Q02078-4;Q02078-5;Q02078-6;Q05BX2;Q06413;Q06413-2;Q06413-3;Q06413-4;Q06413-5;Q06413-6;Q14814;Q14814-2;Q14814-3;Q14814-4;Q14814-5;Q14814-6	0	1	0	0	0	0	0	0	0	0	0
A0A0D9SEU5;Q6VN20;Q6VN20-3;R4GMX8	1	0	0	0	0	0	0	0	0	0	0
A0A0D9SEX5;Q9H6R6;Q9H6R6-2	0	0	0.285427	0	0	0	0	0	0	0.386753	0.32782
A0A0D9SEY1;E7EN19;E7ENQ1;G3XAA2;G5E948;H7C360;O95819;O95819-2;O95819-3;O95819-4;O95819-5;O95819-6
A0A0D9SF44;A0A0R4J2E2;Q9Y3T6;Q9Y3T6-3	1	0	0	0	0	0	0	0	0	0	0
A0A0D9SF53;A0A0D9SFB3;A0A0D9SG12;A0A2R8Y4A4;A0A2R8Y645;A0A2R8YCW1;A0A2R8YF78;A0A2R8YFR4;A0A2R8YFS5;A0A2U3TZJ9;O00571
A0A0D9SF60;Q99569;Q99569-2	0	0.503566	0	0	0	0	0	0	0	0	0.496434
A0A0D9SF63;Q9BZK7	0.597207	0.402793	0	0	0	0	0	0	0	0	0
A0A0D9SFB1	0	0	0.371678	0	0	0	0	0	0.305981	0	0.322341
A0A0D9SFB5;P08319;P08319-2	0	0	0	0	0	0	1	0	0	0	0
A0A0D9SFE1;Q9H936	0	0	0	0	0	0	0	1	0	0	0
A0A0D9SFG6;O43739;O43739-2;Q15438;Q15438-2;Q15438-3;Q99418;Q99418-2	0	0.316735	0	0	0	0	0.683265	0	0	0	0
A0A0D9SFJ2;A0A1B0GWF1;A0A2R8Y5Y4;A0A2R8Y6P1;Q6ZU35
A0A0D9SFK2;Q92614;Q92614-3;Q92614-4	0	1	0	0	0	0	0	0	0	0	0
A0A0D9SFR6;Q16760;Q16760-2;Q86XP1;Q86XP1-2;Q86XP1-3;Q86XP1-5	0	0	0.600679	0	0	0.399321	0	0	0	0	0
A0A0D9SFT8	0	0	0	0	0	0.346404	0	0	0.653596	0	0
A0A0D9SG71;P49459;P49459-3	1	0	0	0	0	0	0	0	0	0	0
A0A0D9SG72;A0A1B0GTP9;A0A1B0GVQ5;A0A1B0GWF2;A0A2R8Y5D4;P61764;P61764-2	0	0	0	0	0.61204	0	0	0	0	0	0.38796
A0A0D9SG79;Q9NZ09;Q9NZ09-3;Q9NZ09-4
A0A0D9SG96;Q9ULB1-3	0.632334	0	0	0	0	0.367666	0	0	0	0	0
A0A0D9SGD6;B0QZE2;B7Z2J6;E7ENI9;E7EV75;Q15326;Q15326-2;Q15326-5	0	0.637759	0	0	0	0	0	0	0.362241	0	0
A0A0D9SGF6;Q13813;Q13813-2	0	0.339864	0	0.660136	0	0	0	0	0	0	0
A0A0D9SGH0;A0A1B0GV11;Q92581;Q92581-2;Q92581-3	0	0	0	0	0	0.373909	0	0	0.626091	0	0
A0A0D9SGJ6;C9JFZ1;J3KPK1;J3KQV8;O43426;O43426-2;O43426-4
A0A0G2JH30;A0A0G2JPX0;A0A2R8YFP9;A6NK88;P49918;P49918-2	0	0	0	0	0	0	1	0	0	0	0
A0A0G2JH68;O60610	0	0	0	0	0	0	1	0	0	0	0
A0A0G2JHC2;Q6NYC8	0	0	0	0	0	0	0	0	0	0.538368	0.461632
A0A0G2JHL0;A0A0G2JK44;A0A140T9E9;A0A140T9F7;A0A140T9V2;H0Y6K2;P25440;P25440-2;P25440-3;U3KQA6	0	1	0	0	0	0	0	0	0	0	0
A0A0G2JI43;A0A0G2JIJ2;A0A140T926;A0A140T9C9;A0A140T9I2;A0A140T9R0;A0A140T9R2;A0A140T9T8;A0A140T9U6;F6UB75;P28068	1	0	0	0	0	0	0	0	0	0	0
A0A0G2JIR1;A0A0G2JIS2;A0A0G2JK64;A0A0G2JRN8;A0A0G2JRR0;A2ABF8;A2ABF9;Q96KQ7;Q96KQ7-2	0	1	0	0	0	0	0	0	0	0	0
A0A0G2JIW1;P0DMV8;P0DMV9	0	0	0	0	0	0	1	0	0	0	0
A0A0G2JJD3;O95870	0	0	0	0	1	0	0	0	0	0	0
A0A0G2JJP1;Q9C019	0	0	0	0	1	0	0	0	0	0	0
A0A0G2JL52;A0A140T8Y0;A0A140TA35;B4E0K6;Q5ST30;Q5ST30-4	0	0	0	0	0	0	0	1	0	0	0
A0A0G2JLK7
A0A0G2JLQ8;A0A0G2JLX3;A0A0G2JNC8;A0A0G2JP37;A0A0G2JPB6;A0A0G2JPQ2;F5H5B1;F5H7Q5;J3KN39;K7EJ90;K7ELX1;Q9NX02;Q9NX02-2;Q9NX02-3;Q9NX02-4	0	0	0	0	0	1	0	0	0	0	0
A0A0G2JM39;A0A0G2JN91;A0A0G2JNH1;M0QYD1	0	0	0	0	0	0	0	1	0	0	0
A0A0G2JM63;A0A0G2JNK3;A0A0G2JPH3;Q8WX94-2;Q8WX94-3
A0A0G2JM70;Q9NV79;Q9NV79-2;Q9NV79-3;V9GZ41	0	0	1	0	0	0	0	0	0	0	0
A0A0G2JMD2;A0A2R9YJI8	0	0	0	0	0.687234	0	0	0	0.312766	0	0
A0A0G2JMW3;A0A0G2JP44;Q9HBB8;Q9HBB8-2;Q9HBB8-4	0	0	0	0	0	0	0	0	0	0	1
A0A0G2JMX7;A0A0G2JPD5;A0A0G2JQJ7;A0A0G2JS76;P10636;P10636-6;P10636-7;P10636-8;P10636-9
A0A0G2JMZ6;O60282	0	0	0.376876	0	0	0	0	0	0.623124	0	0
A0A0G2JMZ8;Q16625	0	0	0	0	0	0	0	0	0	0	1
A0A0G2JN23;A0A0G2JQ38	0	0	0	0	0	0	0	0	0	0.425443	0.574557
A0A0G2JN42;A0A0G2JNJ8;Q6W4X9	0	1	0	0	0	0	0	0	0	0	0
A0A0G2JN53	0	0	0	0	0	0	0	1	0	0	0
A0A0G2JN84;P59817	0	0	0.344866	0	0	0	0.655134	0	0	0	0
A0A0G2JNW7;Q9Y666	0	0	0	0	0.41312	0	0	0	0	0.245146	0.341734
A0A0G2JNZ2;A0A669KB89;Q14160	0	0	0	0.621297	0	0	0	0	0	0	0.378703
A0A0G2JPC8;B4DTC2;E7EPX8;E7ER82;Q8TC27	0.441387	0	0	0	0	0.270123	0	0	0.28849	0	0
A0A0G2JPZ6;A0A0J9YWU2;Q9H3Q3	0	0	0	0	0.389579	0	0	0	0	0.307235	0.303186
A0A0G2JQ41;A0A1C7CYZ0;B7Z683;Q12979;Q12979-2;Q12979-4	0	0	0.374902	0	0	0	0.625098	0	0	0	0
A0A0G2JQC6;A0A0G2JQK9;A0A0G2JRT1;E7EWN1;Q99102-3	0	0	0	0	0	0	0	0	0	1	0
A0A0G2JQT1;A0A0G2JR96	0	0	0	0	0	0	0	0	0.5324	0	0.4676
A0A0G2JRG1
A0A0G2JS52;Q01538;Q01538-2	0	0	0.267273	0	0	0	0	0	0.732727	0	0
A0A0J9YVP6;Q9UHX1-2	0	1	0	0	0	0	0	0	0	0	0
A0A0J9YVW4	0	0	1	0	0	0	0	0	0	0	0
A0A0J9YW18;F6RP06;Q12983	0	0	0	0	0	0	0	1	0	0	0
A0A0J9YW63	0	0	0.304537	0	0	0	0	0	0	0.358748	0.336716
A0A0J9YW64;A6NIW2;Q5JSL3	0	0	0	0.279563	0	0	0	0.325193	0	0	0.395245
A0A0J9YWD2;A0A0J9YX19;A0A0J9YXY6;A0A0J9YYK8;A0A1B0GTJ5;A0A1B0GU79;A0A1B0GUR8;A0A1B0GVR1;Q9UBY8	0	0	0	0	0	0	0	0	1	0	0
A0A0J9YWD5;A0A0J9YX88;A0A0J9YYB5;B7ZM65;E9PJ24;F8WEF5;Q9P1Y6;Q9P1Y6-2;Q9P1Y6-3	0	1	0	0	0	0	0	0	0	0	0
A0A0J9YWD6;O75398-5	0	0	0.500184	0	0	0	0	0	0.499816	0	0
A0A0J9YWE1;A0A0J9YWN0	0	0	0	0	0	0	0	1	0	0	0
A0A0J9YWL0;Q9Y4K1	0	1	0	0	0	0	0	0	0	0	0
A0A0J9YWR7;A0A0J9YXE4;Q8N2F6;Q8N2F6-2;Q8N2F6-3;Q8N2F6-4	0	0	0	0	0	0	0	1	0	0	0
A0A0J9YWV4;O75154;O75154-2;O75154-3;X6RFI8	0	0	0	0	0	0	0	0	1	0	0
A0A0J9YX34;A0A6Q8PEY7;A0A6Q8PF18;A0A6Q8PF63;A0A6Q8PF74;A0A6Q8PFB0;A0A6Q8PFI4;A0A6Q8PFM2;A0A6Q8PFS5;A0A6Q8PFV0;A0A6Q8PFX3;A0A6Q8PG16;A0A6Q8PGE9;A0A6Q8PGG4;A0A6Q8PGL5;A0A6Q8PH06;A0A6Q8PHE9;A0A6Q8PHG4;A0A6Q8PHP4;A0A6Q8PHR6;C9J084;Q9C040;Q9C040-2	0	0	0	0	0	0.568786	0	0	0	0.431214	0
A0A0J9YX62;C9J2C4;O75190;O75190-2;O75190-3	0	1	0	0	0	0	0	0	0	0	0
A0A0J9YX66;A0A0J9YXJ0;A0A1B0GU44;A0A1B0GUN8;E9PC62;O95319;O95319-2;O95319-3;O95319-4;O95319-5;Q5VZZ6;V9GYD9	0	0	0	0	0	0	0	0	1	0	0
A0A0J9YXF2;Q15165;Q15165-1	0	0	0	0	1	0	0	0	0	0	0
A0A0J9YXM6;Q562E7	1	0	0	0	0	0	0	0	0	0	0
A0A0J9YXN7	0	0	1	0	0	0	0	0	0	0	0
A0A0J9YXT0;H7C5H6;Q9H0F7;Q9H0F7-2	0.371908	0	0	0	0	0	0.628092	0	0	0	0
A0A0J9YY17;A0A1C7CYW8;A0A669KB38;Q8IVF4	0	0	0	0	0	0	0	0	0	1	0
A0A0J9YY72;A0A1W2PQQ1;Q5HYW2	0	0.427968	0.572032	0	0	0	0	0	0	0	0
A0A0J9YYF0	0	1	0	0	0	0	0	0	0	0	0
A0A0J9YYF7;Q86T65;Q86T65-4	0	0.234821	0	0	0	0	0	0.495749	0	0	0.26943
A0A0K0K1A5	0.666691	0	0	0	0	0.333309	0	0	0	0	0
A0A0R4J2E8;D6REM6;P43243	0	1	0	0	0	0	0	0	0	0	0
A0A0R4J2F3;P0DPB6	0.634945	0.365055	0	0	0	0	0	0	0	0	0
A0A0R4J2F6;Q12894;Q12894-2	0	0.324166	0	0	0.675834	0	0	0	0	0	0
A0A0S2Z4L3;A0A3B3ISJ1;G5E9F8;P07225	0	0	0	0	0.638314	0	0	0	0	0	0.361686
A0A0S2Z4L7;O60603	0	0	0	0	0	0	0	0	0	0.406554	0.593446
A0A0S2Z4Q7;A0A1W2PQQ6;A0A1W2PQR0;A0A1W2PR45;A0A1W2PRC6;A0A1W2PRD9;A0A1W2PRY1;A0A1X7SBT2;C9JYS9;Q9UNP4;Q9UNP4-2;Q9UNP4-3	0	0	0	0	0	0	0	0	1	0	0
A0A0S2Z5D0;A0A1B0GTU6;H3BUV4;Q9NWW5;Q9NWW5-2	0	0	0	0	0.418269	0	0	0	0	0.265216	0.316515
A0A0U1RQE4;A0A494C1M0;Q5HYK7;Q5HYK7-2;Q5HYK7-3	0.579818	0	0	0	0	0.420182	0	0	0	0	0
A0A0U1RQK7
A0A0U1RQK9	0	0	0	0	0	0	0	0.556261	0	0	0.443739
A0A0U1RQM0;H0YKX3;H0YMA4;Q15004
A0A0U1RQQ9;Q6P3W7
A0A0U1RQS4;A0A0U1RR93;Q9BYB0;Q9BYB0-3	0	0	0	0	0	0	0	0	0.245027	0.428462	0.326511
A0A0U1RQT8;Q8TCZ2;Q8TCZ2-2;Q8TCZ2-3;Q8TCZ2-5	0	0	0.23157	0	0	0	0	0	0	0.415148	0.353282
A0A0U1RQW3;Q8WXE1;Q8WXE1-2
A0A0U1RQW6;E7EPU2;Q9Y2E4	0	1	0	0	0	0	0	0	0	0	0
A0A0U1RQY4	0	1	0	0	0	0	0	0	0	0	0
A0A0U1RR06;Q9Y484;Q9Y484-2;Q9Y484-3	0	0	0.241486	0	0	0	0.758514	0	0	0	0
A0A0U1RR16;A0A3B3IRZ7;Q8NEY4;Q8NEY4-2	0	1	0	0	0	0	0	0	0	0	0
A0A0U1RR25	0	0	0	0	0	0	0	0	0	0.574889	0.425111
A0A0U1RR27;H3BTW5;Q7Z401;Q7Z401-2	1	0	0	0	0	0	0	0	0	0	0
A0A0U1RR32;A0A0U1RRH7;P0C0S8;P20671;Q96KK5;Q99878;Q9BTM1	0	1	0	0	0	0	0	0	0	0	0
A0A0U1RR76;A6NJ78;A6NJ78-2;A6NJ78-4;P0C7V9	0	0	0	0	0	0	0	1	0	0	0
A0A0U1RRA6;B5MCG9;B5MCU0;H7C0E9;Q9Y2K5	0.605321	0	0	0	0	0.394679	0	0	0	0	0
A0A0U1RRB6;J3QT38;Q9Y2D4;Q9Y2D4-2
A0A0U1RRB9;F2Z2V1;Q96C11;Q96C11-3	0	0	0	0	0	0	1	0	0	0	0
A0A0U1RRK1;A0A286YF11;F6XEV2;Q9BPX6;Q9BPX6-3	0	0	0	0	0	0	0	1	0	0	0
A0A0U1RRL7	0	0.369753	0	0	0	0	0	0.345273	0	0	0.284974
A0A0U1RRL8;Q8TB22;Q8TB22-2;Q8TB22-3	0	0	0	0	0	0	0	1	0	0	0
A0A126GWB3;P47888	0	0	0.650971	0	0	0	0	0	0.349029	0	0
A0A140LJL2;Q8N350	0	0	0	0	0	0.463244	0	0	0.536756	0	0
A0A140T8Y3;A0A140T902;A0A140T9C0;A0A140TA33;A0A140TA41;A0A140TA52;A0A3B3ISX9;P22105;P22105-1;P22105-4	0	1	0	0	0	0	0	0	0	0	0
A0A140T913;A0A140T933;A0A140T955;A0A140T9I0;A0A140T9X5;A0A1W2PRT9;Q53Z42	0	0	0	0	0.50514	0	0	0	0	0.221392	0.273468
A0A140T951	0	0	0	0	0.411217	0	0	0	0	0.259993	0.32879
A0A140T962;A0A140T9B3;A0A140T9J9;A0A1W2PR11;Q5QT33	0	0	0	0	0.708824	0	0	0	0	0	0.291176
A0A140T9G8;Q0P5T2;Q5SQH8;Q5SQH8-2;Q5SQH8-4	0	0.388414	0	0	0	0	0	0.387427	0	0	0.224159
A0A140T9T7;Q03518	0	0	0	0	1	0	0	0	0	0	0
A0A140TA01;E9PQT8;E9PQZ5;O43189;O43189-2	0.722076	0.277924	0	0	0	0	0	0	0	0	0
A0A140TA09;Q99942
A0A182DWF2;A0A182DWF3;Q9NNW7;Q9NNW7-2	0	0	0	0	0	0	0	1	0	0	0
A0A182DWH7;P49908
A0A182DWI4;E9PN30;Q9BQE4	0	0	0.35073	0	0	0	0	0	0.64927	0	0
A0A1B0GTB0;A0A1B0GTU8;A0A1B0GU12;A0A1B0GUT7;A0A1B0GVB9;A0A1B0GVC7;A0A1B0GVW0;A0A1B0GWJ8;A0A1C7CYW4;B7Z413;H7C3E1;O75787;O75787-2	0	0	0	0	0	0	0	0	0	0.514573	0.485427
A0A1B0GTF3;A0A6I8PIT5;A0A6I8PIW1;A0A6I8PLB1;O43301	0	0	0.330056	0	0	0	0	0	0.369436	0	0.300508
A0A1B0GTG2;A0A1B0GW77;P49419;P49419-2	0	0	0	0.564985	0	0	0	0.435015	0	0	0
A0A1B0GTJ7;A0A1B0GWJ0;P30566	0	0	0	0	0	0	1	0	0	0	0
A0A1B0GTJ8;A0A1B0GV63;A0A1B0GVK1;A0A1B0GWJ2;A0A3F2YNW7;A0A6Q8NVI4;H0Y7H8;Q8NFD5;Q8NFD5-2;Q8NFD5-3;Q8NFD5-4	0	1	0	0	0	0	0	0	0	0	0
A0A1B0GTK6	0	0	0	0	0	0	1	0	0	0	0
A0A1B0GTM1;A0A1B0GUM5;E7ETX0;Q8NHX9	0	0	0	0	0	0	0	0	1	0	0
A0A1B0GTM3;A0A1B0GUA4;A0A1B0GUH5;A0A1B0GW68;Q13510;Q13510-2
A0A1B0GTT2	0	0	0	0	0	0	0	0	1	0	0
A0A1B0GTU3;Q96L93;Q96L93-2;Q96L93-4;Q96L93-5;Q96L93-6	0	0	0.649944	0	0	0	0	0	0.350056	0	0
A0A1B0GTU4	0	0	0	0	0	0	1	0	0	0	0
A0A1B0GTU5;H0Y488;O14497;O14497-2;O14497-3	0	1	0	0	0	0	0	0	0	0	0
A0A1B0GTU7;H0YD36;P54098	0	0	0	0	0	0	0	1	0	0	0
A0A1B0GTV6	0	0	0	0	0	0	0	0.68435	0	0	0.31565
A0A1B0GTW1;A0A2R8YDH4;A0A3B3ITE1;Q9UDY2;Q9UDY2-3;Q9UDY2-7	0	0	0	1	0	0	0	0	0	0	0
A0A1B0GTX1;A0A1C7CYY6;Q6XZF7;Q6XZF7-2	0.596595	0.403405	0	0	0	0	0	0	0	0	0
A0A1B0GUA3;A0A6Q8PGG2;A0A6Q8PH45;A0A6Q8PHL8;Q96EK5	0	0	0	0	0	0	0	0	1	0	0
A0A1B0GUC2;A0A1W2PP33;C9J7I0	0	0	0.614137	0	0	0	0	0	0	0.385863	0
A0A1B0GUF4	0	0	0	0	0	0	0	0	1	0	0
A0A1B0GUG7;A0A1B0GWB7;A0A1B0GWI3;A0A1B0GWK3	0.634662	0	0	0	0	0.365338	0	0	0	0	0
A0A1B0GUI1;Q6GYQ0;Q6GYQ0-2;Q6GYQ0-3;Q6GYQ0-4;Q6GYQ0-5;Q6GYQ0-6;Q6GYQ0-7	0	0	0	0	0	0	0	0	0	1	0
A0A1B0GUL3	0	0	0	0	0	0	0	0	1	0	0
A0A1B0GUL6;E9PEZ5;Q9UPP5;Q9UPP5-2	0	0	0.410966	0	0	0	0.589034	0	0	0	0
A0A1B0GUN5	0	1	0	0	0	0	0	0	0	0	0
A0A1B0GUN9
A0A1B0GUS7	0.646532	0	0	0	0	0.353468	0	0	0	0	0
A0A1B0GUZ2;P00797;P00797-2	0.466378	0	0.533622	0	0	0	0	0	0	0	0
A0A1B0GUZ7;Q14156;Q14156-2	0	0	0	0	0.399983	0	0	0	0	0.26584	0.334177
A0A1B0GV47;Q7Z4S6;Q7Z4S6-2;Q7Z4S6-4;Q7Z4S6-5;Q7Z4S6-6
A0A1B0GV48;D6RBC4;Q8NAP3	0	0	0.465209	0	0	0	0	0	0	0.534791	0
A0A1B0GV71;A0A1B0GW34;A0A1B0GWD3;B4DFF3;H3BNK7;H3BR00;O95086;Q13286;Q13286-2;Q13286-3;Q13286-4;Q13286-5;Q13286-7;Q2TA70;Q9UBD8	0	0	0	0	0	0	0	0	0	0.476711	0.523289
A0A1B0GVD5;A0A1B0GVP3;A0A1B0GW44;A0A1B0GWE8;P07339	0	0	0	0	0.640768	0	0	0	0	0.359232	0
A0A1B0GVG4	0.456707	0	0	0	0	0	0	0	0.543293	0	0
A0A1B0GVI7;A0A2R8Y7G1;P35869	0	1	0	0	0	0	0	0	0	0	0
A0A1B0GVL3;Q05086;Q05086-2;Q05086-3	0.48731	0	0	0	0	0	0.51269	0	0	0	0
A0A1B0GVV3;Q5EBL4	0	0	0	0	0	0	1	0	0	0	0
A0A1B0GVV8	0.691505	0	0	0	0	0.308495	0	0	0	0	0
A0A1B0GW05	0	0	0	0	1	0	0	0	0	0	0
A0A1B0GW23;Q03154	0	0	0	0	0	0	1	0	0	0	0
A0A1B0GW38
A0A1B0GW41;E9PEN0;Q8WYH8;Q8WYH8-2	0	1	0	0	0	0	0	0	0	0	0
A0A1B0GWB2	0	0	0	0	0	0	0	0	0	1	0
A0A1B0GWD8;Q9C093-4
A0A1B0GWI2;O75503	0	0	0	0	0	0	0	0.437453	0	0.274705	0.287841
A0A1C7CYX0	0	0	0	0	0.385755	0	0	0	0	0.297223	0.317022
A0A1C7CYX9	0	0	0	0	0	0	1	0	0	0	0
A0A1D5RMN4;P23945;P23945-2;P23945-4
A0A1P0AYU5;Q9BWM7	0	0	0	0	0	0	0	1	0	0	0
A0A1W2PNF0;A0A1W2PNY6;A0A1W2PPE6;A0A1W2PPG9;A0A1W2PPH4;A0A1W2PQ13;A0A1W2PQ60;A0A1W2PQD6;A0A1W2PQH2;A0A1W2PQL8;A0A1W2PR66;A0A1W2PRN3;A0A1W2PRT7;A0A1W2PS45;A0A1W2PS77;A0A1W2PSA9;A0A1W2PSD1;Q9Y2D2;Q9Y2D2-2;Q9Y2D2-3	0	0	0	0	0	0	0	1	0	0	0
A0A1W2PNH8;A0A1W2PNQ8;A0A1W2PNR0;A0A1W2PNW5;A0A1W2PPB6;A0A1W2PPR7;A0A1W2PQA9;A0A1W2PQP4;A0A1W2PQZ1;A0A1W2PS19;K7ELE1;K7EPJ2;O95427	0	0	0.363208	0	0	0	0	0	0.636792	0	0
A0A1W2PNP0;Q969N2;Q969N2-5	0	0	0	0	1	0	0	0	0	0	0
A0A1W2PNR9;Q9Y5U9	0	0	0	0	0	0	0	0	0.590359	0.409641	0
A0A1W2PNT1	0.722467	0.277533	0	0	0	0	0	0	0	0	0
A0A1W2PNU4;A0A286YES2;F8VYC4;P0DJD0;P0DJD1	0	0.590727	0	0	0	0	0	0.409273	0	0	0
A0A1W2PNV4	0.407469	0	0	0	0	0	0.592531	0	0	0	0
A0A1W2PNW1;A0A494C0T4;H0YJH6;P42226;P42226-3	0	0	0	0	0	0	1	0	0	0	0
A0A1W2PNX8;Q9H3U1;Q9H3U1-2	0	0	0	0	0	0	1	0	0	0	0
A0A1W2PNY5;A0A1W2PPP6;A0A1W2PQA7;A0A1W2PQZ6;A0A1W2PR08;A0A1W2PRF0;A0A1W2PRF5;A0A1W2PRJ0;A0A1W2PS93;A0A1X7SBS0;G5E9D4;Q96EB1;Q96EB1-2;Q96EB1-3	0.734984	0.265016	0	0	0	0	0	0	0	0	0
A0A1W2PNZ9;H7BXU7;Q15652;Q15652-3	0	0	0	0	0	1	0	0	0	0	0
A0A1W2PP04;Q5JY83;Q9Y388	0	1	0	0	0	0	0	0	0	0	0
A0A1W2PP11;Q9H300	0	0	0	0	0	0	0	1	0	0	0
A0A1W2PPB5;Q13873;Q13873-2	0	0.30449	0.211857	0	0	0	0	0	0	0.239979	0.243673
A0A1W2PPB7;E9PH70;H0Y8E4;Q9ULH0;Q9ULH0-2;Q9ULH0-4	0	0	0	0	0.440256	0	0	0	0	0.262992	0.296752
A0A1W2PPC6;Q9H3H5;Q9H3H5-2	0	0	0	0	1	0	0	0	0	0	0
A0A1W2PPD8	0	0	0	0	0	0	0	0	1	0	0
A0A1W2PPH1;P23368	0	0	0	0	0	0	0	1	0	0	0
A0A1W2PPH6	0	0	0	0	0	0	0	1	0	0	0
A0A1W2PPI5;Q5JSJ4	0	0.563724	0	0	0	0	0	0	0	0.436276	0
A0A1W2PPJ5;J3QT51;J3QT87;Q96SW2;Q96SW2-2
A0A1W2PPS1;Q00839;Q00839-2	0	1	0	0	0	0	0	0	0	0	0
A0A1W2PPV0;A0A1W2PQG5;Q9Y5P2;Q9Y5P2-2	0	0	0	0	0	0.238088	0	0	0.496514	0.265398	0
A0A1W2PPZ5;P23193	0	0	0	0	0	0	1	0	0	0	0
A0A1W2PQ75;O15488;O15488-2;O15488-3;O15488-4;O15488-6	0	0.764674	0	0	0	0	0	0.235326	0	0	0
A0A1W2PQD2;Q9UBB4	0.409693	0	0	0	0	0	0.590307	0	0	0	0
A0A1W2PQE7	0	0	0	0	0	0	0	0.450051	0	0.287525	0.262424
A0A1W2PQM2	0	0.39474	0.60526	0	0	0	0	0	0	0	0
A0A1W2PQM3	0	0	0	0	1	0	0	0	0	0	0
A0A1W2PQM5;A0A1W2PR19;A0A1W2PRG0
A0A1W2PQP6;Q9BWL3;Q9BWL3-2;Q9BWL3-3;Q9BWL3-4;Q9BWL3-5;X6R6F3;X6R6S3	0	0.218095	0	0	0	0	0	0	0	0.322251	0.459654
A0A1W2PQQ5	0	0	0	0	0	0	0	0.298847	0	0.286213	0.41494
A0A1W2PQS6	0	0	0	0	0	0	0	1	0	0	0
A0A1W2PR09;A0A1W2PRL5;A0A1W2PRM0;F5GYH1;Q8NC96
A0A1W2PR17;F2Z2I2;Q16875;Q16875-2;Q16875-3;Q16875-4;Q5VX20;Q5W015	0	0	0	0	0	0	1	0	0	0	0
A0A1W2PR28;A0A1W2PRJ5;A0A6Q8PFR7;Q5JU85;Q5JU85-3	0	0	0	0	0	0.340153	0	0	0.659847	0	0
A0A1W2PR46;A0A1X7SBR3;P14136;P14136-2;P14136-3	0	0.691995	0	0	0	0	0	0	0	0	0.308005
A0A1W2PRB8	0	0.526294	0.214009	0	0	0	0	0	0	0	0.259697
A0A1W2PRI9;E9PNW5	0	0	0.305869	0	0	0	0	0	0.694131	0	0
A0A1W2PRW4;P53816	0	0	0	0	0	0	1	0	0	0	0
A0A1W2PS05;Q8NEB9	1	0	0	0	0	0	0	0	0	0	0
A0A1W2PS43;Q14108	0	0	0	0	0.525686	0	0	0	0	0.240249	0.234065
A0A1W2PS52	0	0	0	0	0	0.329084	0	0.318296	0	0.35262	0
A0A1W2PS94;A0A2R8Y358;Q9BXT5	1	0	0	0	0	0	0	0	0	0	0
A0A1X7SBT1;Q9H1D0;Q9H1D0-2	0	0	0	0	0	0	0	1	0	0	0
A0A1X7SBY3;H0Y860;Q9P246;Q9P246-2	0	0	0.377516	0	0	0	0	0	0.622484	0	0
A0A1X7SBZ2;A0A5H1ZRQ2;Q92841	0	0.353361	0	0	0.646639	0	0	0	0	0	0
A0A1Y0BRN3;A0A590UJ40
A0A286YEV4;A0A286YEV9;A0A286YEW8;A0A286YEX1;A0A286YF00;A0A286YF45;A0A286YF51;A0A286YF73;A0A286YFC6;A0A286YFE7;A0A286YFF5;A0A286YFH9;A0A286YFM2;B7Z2B2;E7ERQ4;Q8NHS3	0	0	0	0	0	0	0	0	1	0	0
A0A286YEX4;P08651;P08651-5;P08651-6	0	1	0	0	0	0	0	0	0	0	0
A0A286YF17;A0A286YFD0;P42898;P42898-2;Q5SNW7	0	0	0	0	0	0	1	0	0	0	0
A0A286YF22;O43175	0	0	0	0	0	0	1	0	0	0	0
A0A286YF37;Q9UK22	0	0	0	0	0	1	0	0	0	0	0
A0A286YFA5;Q8NGQ1	0	0	0	0	0	0	0	0	1	0	0
A0A286YFE3;A0A286YFF7;A0A286YFL8;A0A2C9F2P4;P50897;Q5T0S4	0	0	0	0	0.441877	0	0	0	0	0.296929	0.261195
A0A286YFF8;Q7Z3U7;Q7Z3U7-2;Q7Z3U7-5;Q7Z3U7-6	0	0	0	0	0	0	1	0	0	0	0
A0A2Q2TTZ9;P01593;P01594	0	0	1	0	0	0	0	0	0	0	0
A0A2Q3DQE3;Q13555;Q13555-10;Q13555-11;Q13555-2;Q13555-3;Q13555-4;Q13555-5;Q13555-6;Q13555-7;Q13555-8;Q13555-9;Q5SWX3;Q8WU40	0	0.581567	0	0	0	0.418433	0	0	0	0	0
A0A2R8Y2A8	0	0	0	1	0	0	0	0	0	0	0
A0A2R8Y2F6;P42336	0	0.603233	0	0	0	0	0	0.396767	0	0	0
A0A2R8Y3M9	0	0	0	0	1	0	0	0	0	0	0
A0A2R8Y3N3;A0A2R8Y5P7;A0A2R8Y6I1;P49590;P49590-2	0	0	0	0	0	0	0	1	0	0	0
A0A2R8Y3S0;A0A2R8Y511;A0A2R8YCL0;Q96JX3	0	0	0	0.431987	0	0	0	0.568013	0	0	0
A0A2R8Y440;A0A2R8Y4P4;A0A2R8Y7S2;A0A2R8YG32;A0A2R8YGG3;P51532;P51532-2;P51532-3;P51532-4;P51532-5;Q9HBD4	0	1	0	0	0	0	0	0	0	0	0
A0A2R8Y455;A0A2R8Y600;A0A2R8Y620;A0A2R8Y7U2;Q86VX2;Q86VX2-2	0	0	0	0	0	1	0	0	0	0	0
A0A2R8Y471;Q12967;Q12967-2;Q12967-3;Q12967-4;Q12967-5;Q12967-6;Q5T7U6	0	0.637386	0	0	0	0	0	0	0.362614	0	0
A0A2R8Y478;A6NNI4;G8JLH6;P21926	0	0	1	0	0	0	0	0	0	0	0
A0A2R8Y484;Q08722;Q08722-2;Q08722-3;Q08722-4	0	0	1	0	0	0	0	0	0	0	0
A0A2R8Y491;E7EWD9;O95718;O95718-1;O95718-2	0	0	0	0	0	0	1	0	0	0	0
A0A2R8Y4C2;A0A2R8Y596;A0A2R8Y5C9;A0A2R8Y5E4;A0A2R8Y6M6;A0A2R8Y8C4;A0A2R8YFK2;A0A2R8YFS8;P56945;P56945-2;P56945-3;P56945-4;P56945-5;P56945-6;P56945-7;P56945-8	0	0	0	0	0	0	1	0	0	0	0
A0A2R8Y4F5	0.578853	0	0	0	0	0	0	0	0.421147	0	0
A0A2R8Y4I8;A0A2R8Y7K2;A0A2U3TZR0;Q9UBP0;Q9UBP0-2;Q9UBP0-3;Q9UBP0-4
A0A2R8Y4K2;Q9Y2S2	0	0	0	0	0	0	1	0	0	0	0
A0A2R8Y4M1;A0A2R8Y615;A0A2R8YGW2;A0A5F9ZHK1;Q9NZA1;Q9NZA1-2;Q9NZA1-3	0	0	0	0	0	0	0	0	0	0.394626	0.605374
A0A2R8Y4T1	0	0	0	1	0	0	0	0	0	0	0
A0A2R8Y4U1;A0A2R8YDF7;O75164	0	1	0	0	0	0	0	0	0	0	0
A0A2R8Y4U4	0	0	0.187963	0	0	0	0	0	0.24911	0.310907	0.25202
A0A2R8Y4V0;A0A2R8Y4Z4;A0A2R8Y5D8;A0A2R8Y6Q0;A0A2R8YDG0;Q09428;Q09428-2	0	0	0	0	0	0	0	1	0	0	0
A0A2R8Y4W0	0	0	0	0	0	0	0	0.441067	0	0.244921	0.314012
A0A2R8Y4W1;A0A2R8Y860;A0A2R8YD46;A0A2R8YFE3;A0A2U3TZS7;P43004;P43004-2	0	0	0	0	0.435459	0	0	0	0	0.249926	0.314614
A0A2R8Y4W2;A0A2R8YE63;Q12929	0	0	0	0	0	0	1	0	0	0	0
A0A2R8Y4Y7;A0A2R8YFW4;Q9UQ90	0	0	0	0	0	0	0	1	0	0	0
A0A2R8Y4Z0;A0A2R8Y7W5;A0A2R8YF61;Q14004;Q14004-2	0	0	0	0	0	0	1	0	0	0	0
A0A2R8Y4Z8	0	0.527249	0	0	0	0.472751	0	0	0	0	0
A0A2R8Y524;A0A2R8YEC9;E9PFW2;O00462	0	0	0	1	0	0	0	0	0	0	0
A0A2R8Y543;A0A2R8Y5A3;A0A2R8Y804;A0A2R8YCH5;B4DGU4;P35222	0	0	0	0	0	0	0	0	0	0.400055	0.599945
A0A2R8Y544;Q9BR61	0.363193	0	0	0	0	0	0.636807	0	0	0	0
A0A2R8Y549;Q8NI35;Q8NI35-2;Q8NI35-3;Q8NI35-4	0	0	0	1	0	0	0	0	0	0	0
A0A2R8Y566;Q9P260-2	0	0	0	0	0	0	1	0	0	0	0
A0A2R8Y595;A0A2R8YFL0;P49711	0	1	0	0	0	0	0	0	0	0	0
A0A2R8Y5A0;A0A2R8YD58;E7EU96;P68400	0	1	0	0	0	0	0	0	0	0	0
A0A2R8Y5D3;A0A2R8YEZ4;O15160;O15160-2	0.587843	0.412157	0	0	0	0	0	0	0	0	0
A0A2R8Y5F1;A0A2R8Y7C8;A0A2R8Y7X5;A0A2R8YDR3;A0A2R8YDZ2;A0A2R8YGD6;A0A2R8YGU4;H3BMQ0;P49815;P49815-2;P49815-3;P49815-4;P49815-5;P49815-6;P49815-7;X5D2U8	0	1	0	0	0	0	0	0	0	0	0
A0A2R8Y5J4;Q9BYG8	0	0	0	0	0	0	0	0	1	0	0
A0A2R8Y5K2;Q96LT7	0.613501	0.386499	0	0	0	0	0	0	0	0	0
A0A2R8Y5N2;A0A2R8Y5S3;A0A2R8YFV7;Q92574;Q92574-2	0	0.747428	0	0	0	0	0	0.252572	0	0	0
A0A2R8Y5P9;Q8TF72
A0A2R8Y5Q8;A0A2R8YHI9;Q15813;Q15813-2	0	0.41449	0	0	0	0	0	0.58551	0	0	0
A0A2R8Y5Y7;D6RAN4;P32969	0	0	0	0	0.493422	0	0	0.506578	0	0	0
A0A2R8Y605
A0A2R8Y635;A0A2R8YDN7;Q9H7F0;Q9H7F0-2	0	0.299199	0.203193	0	0	0	0	0	0	0.258749	0.238859
A0A2R8Y640	0	0	0	0	0	1	0	0	0	0	0
A0A2R8Y648	0	0	0	0	0	0	1	0	0	0	0
A0A2R8Y653;Q9BZX2	0	1	0	0	0	0	0	0	0	0	0
A0A2R8Y661;A0A2R8YGD3;Q9Y4G8
A0A2R8Y6D0	0	0	0	0.285483	0	0	0	0	0	0.254246	0.46027
A0A2R8Y6I6;A0A2R8Y6L5;A0A2R8YDF3;Q13627;Q13627-2;Q13627-3;Q13627-4;Q13627-5	1	0	0	0	0	0	0	0	0	0	0
A0A2R8Y6P2;A0A2R8YDC4;A6NFE3;C9J654;J3KR48;J3KR52	0	0	0	0	0	0	0	0	1	0	0
A0A2R8Y6W8;P19447	0	0.632816	0	0	0	0	0	0	0	0	0.367184
A0A2R8Y6Y7;A0A2R8YDQ9;Q9P2R7;Q9P2R7-2	0	0	0	0	0	0	0	1	0	0	0
A0A2R8Y783	0	0	0.232911	0	0	0	0	0	0	0.357052	0.410037
A0A2R8Y7B4	0.624262	0	0	0	0	0	0	0	0.375738	0	0
A0A2R8Y7D5	0	0	0	0	0	0	0	0	0.522466	0.477534	0
A0A2R8Y7E6;A0A5F9ZHX3;A0A5F9ZI57	0	0	0	0	0	0	0	0	1	0	0
A0A2R8Y7I9;A0A2R8Y855;A0A2U3TZQ7;B4DGM3;J3QKS7;Q969G3;Q969G3-2;Q969G3-4;Q969G3-5	0	1	0	0	0	0	0	0	0	0	0
A0A2R8Y7P6;A0A5F9ZHW5;F8VQP2;Q99700;Q99700-4;V9GY86
A0A2R8Y7Q1;E7ETD6;E9PE19;F5GXF5;Q12830;Q12830-2;Q12830-4	0	1	0	0	0	0	0	0	0	0	0
A0A2R8Y7R4;B2RUZ4;H3BS66	0	0	0	0	0	1	0	0	0	0	0
A0A2R8Y7T6;A0A3B3IRZ4;Q6DN90;Q6DN90-3
A0A2R8Y7U0;H0Y770;O75140;O75140-1;O75140-4;O75140-9
A0A2R8Y7V5;H0Y850;P38398;P38398-4;P38398-7;P38398-8;Q5YLB2
A0A2R8Y7X9;P69891;P69892	0	0.512074	0	0	0	0	0	0	0	0	0.487926
A0A2R8Y7Y4;Q8N8A2;Q8N8A2-2;Q8N8A2-4	0	0	0	0	0	0	1	0	0	0	0
A0A2R8Y811;P62263	0	0	0	0	0.639931	0	0	0.360069	0	0	0
A0A2R8Y840;Q9HCK8;Q9HCK8-2	0	1	0	0	0	0	0	0	0	0	0
A0A2R8Y849;A0A2R8Y8A0;A0A2R8YD14;E7ETK0;P62847;P62847-2;P62847-3;P62847-4	0	0	0	0	0	0	0	1	0	0	0
A0A2R8Y851;P62273;P62273-2	0	0	0	0	0	0	0	1	0	0	0
A0A2R8Y852;A0A2R8YDI1;P39880;P39880-2;P39880-3;P39880-4;P39880-5;P39880-6	0	0	0	0	0	0.270777	0	0	0.390021	0.339202	0
A0A2R8Y880;Q7Z6E9;Q7Z6E9-2	0	1	0	0	0	0	0	0	0	0	0
A0A2R8Y8E0;A0A2U3TZI2;H7C560;P15056	0	0	0	0	0	0	1	0	0	0	0
A0A2R8YCJ8;Q5T2H3;Q9NVV5;Q9NVV5-1;Q9NVV5-3
A0A2R8YCL1;Q13322;Q13322-3;Q13322-4	0	0	0	0	0	0	1	0	0	0	0
A0A2R8YCS7;Q9Y3Z3
A0A2R8YCV2;Q8NCS4
A0A2R8YD30;P11171;P11171-2;P11171-3;P11171-4;Q4VB86	0	0	0	1	0	0	0	0	0	0	0
A0A2R8YD49;A0A2R8YDU7;A0A2R8YEX0;Q9H1P3;Q9H1P3-2	0	0	0.361173	0	0	0	0	0	0.340326	0	0.298502
A0A2R8YD63;Q92547	1	0	0	0	0	0	0	0	0	0	0
A0A2R8YD85;Q96BY6;Q96BY6-3	0	0	0	0	0	0	0	0	0	0.584642	0.415358
A0A2R8YDB8;H7BXF5;Q9H0E3;Q9H0E3-3	0	1	0	0	0	0	0	0	0	0	0
A0A2R8YDD5;P30531	0	0	0	0	0	0	0	0	0	0	1
A0A2R8YDI5;O94823;O94823-2;O94823-3	0	0	0	0	0	0	0	0.591169	0	0	0.408831
A0A2R8YDL0;O75443
A0A2R8YDQ0;Q9H267	1	0	0	0	0	0	0	0	0	0	0
A0A2R8YDR8;Q9BZD2;Q9BZD2-2	0	0	0.31034	0	0	0	0	0.392455	0.297205	0	0
A0A2R8YDT1;P15104	0.443156	0	0	0	0	0	0.556844	0	0	0	0
A0A2R8YE10;Q9NRW7	0	0	0	0	0	1	0	0	0	0	0
A0A2R8YE69;P0CG41;Q8IX94	0	0	0	0	0	0	0	0	1	0	0
A0A2R8YE77;A0A2U3TZM1;O14936;O14936-3	0	0	0	0.573278	0	0	0	0	0	0	0.426722
A0A2R8YEA1;B5MCJ9;O15016;O15016-2	0	0	0	0	0	0	0	0	1	0	0
A0A2R8YEH1	0.665152	0	0.334848	0	0	0	0	0	0	0	0
A0A2R8YEI5;P52757;P52757-9	1	0	0	0	0	0	0	0	0	0	0
A0A2R8YEL6
A0A2R8YEM2;D6RG18;D6RHI7;P51946	0	1	0	0	0	0	0	0	0	0	0
A0A2R8YEM9;O15050	0.410996	0	0	0	0	0	0.589004	0	0	0	0
A0A2R8YEZ0;B7WP89;Q0P651;Q0P651-2;Q0P651-3;Q0P651-4	0	0	0	0.299578	0	0	0	0.700422	0	0	0
A0A2R8YF49	0	1	0	0	0	0	0	0	0	0	0
A0A2R8YF72;A0A3B3IRF0;A0A3B3IRT9;A0A3B3IRX5;A0A3B3ISI4;A0A3B3ISW5;A0A3B3ITJ8;A0A3B3ITL3;A0A3B3ITS6;A0A3B3IUE2;H7BYU4;Q9UL68;Q9UL68-4	0	0	0	0.359199	0	0	0	0.369749	0	0.271052	0
A0A2R8YFG2;Q96T66	0	0	0	0	0	0	0	1	0	0	0
A0A2R8YFH5;Q15437	0.680503	0	0	0	0	0.319497	0	0	0	0	0
A0A2R8YFN3;A1Z1Q3;A1Z1Q3-1	0	0	0	0	0	0	1	0	0	0	0
A0A2R8YFN7	0	0	0	0	0	0	0	0	1	0	0
A0A2R8YFW3;O60907;O60907-2	0	0.305744	0	0	0	0	0.694256	0	0	0	0
A0A2R8YG42;B1ALK7;Q14155-1;Q14155-5	0.651566	0	0	0	0	0.348434	0	0	0	0	0
A0A2R8YGH5;H7C1E4;P61966	0	0	0	0	0	0.430051	0	0	0.569949	0	0
A0A2R8YGW0;P51795;P51795-1	0	0	0	0	0	0	0	0	1	0	0
A0A2R8YHG5;Q9BZV2	0	0	0	0	0	0	0	0	0	0.485055	0.514945
A0A2U3TZH3;Q05639
A0A2U3TZK7	0	0.231881	0	0	0	0	0	0.768119	0	0	0
A0A2U3TZL5;E9PNW4;P13987;P13987-2	0	0	0	0	0	0	0	0	0	0	1
A0A2U3TZT9	0	0	0.390088	0	0	0	0	0	0.37689	0.233022	0
A0A2U3TZU2;P06744	0	0	0	0	0	0	1	0	0	0	0
A0A2U3TZV8;Q4KWH8;Q4KWH8-2;Q4KWH8-3;Q4KWH8-4	0	0	0	0	0	0	0	0	0.516288	0	0.483712
A0A2Y9D025;P56556;R4GN43	0	0	0	0	0	0	0	1	0	0	0
A0A384DVU0;Q8IY17;Q8IY17-2;Q8IY17-3	0	0	0	0	0.63062	0	0	0	0	0	0.36938
A0A3B3IRE4;Q8TCE6;Q8TCE6-2	0	0	0	0	0	0.256031	0	0	0.743969	0	0
A0A3B3IRI9;A0A3B3IRJ3;A0A3B3IRV1;A0A3B3IRZ0;A0A3B3IS37;A0A3B3IS68;A0A3B3ISJ4;A0A3B3IT04;A0A3B3IT30;A0A3B3ITZ3;A0A3B3IU52;A6NFW1;A6NGJ7;Q9BY41;Q9BY41-4	0	0	0	0	0	0	1	0	0	0	0
A0A3B3IRJ9;Q9Y2H2	0	0	1	0	0	0	0	0	0	0	0
A0A3B3IRK5;Q9H2D1	0	0.260239	0	0	0	0	0	0.499385	0	0	0.240376
A0A3B3IRL2;O75629	0	0	0	0	0	0	0	0	0	1	0
A0A3B3IRL5;C9J381;P20839;P20839-2;P20839-3;P20839-4;P20839-5;P20839-6;P20839-7	1	0	0	0	0	0	0	0	0	0	0
A0A3B3IRM7	0	0	0	0	0	0	0	0	1	0	0
A0A3B3IRN8;A0A3B3ITX0;P24311	0	0	0	0	0	0	0	1	0	0	0
A0A3B3IRP9	0	0	0.201771	0	0	0	0	0	0.489206	0.309023	0
A0A3B3IRR1;A0A3F2YNY7;P08397;P08397-2	0	0	0	0	0	0	1	0	0	0	0
A0A3B3IRS4;A0A3B3IRX3;A0A3B3IS46;H0YHC1;Q71F56	0	0	0.431292	0	0	0	0	0	0.568708	0	0
A0A3B3IRT8;C9IZQ1;C9J3L8;C9J5W0;E9PAL7;P43307	0	0	0	0	0	0	0	1	0	0	0
A0A3B3IRU6;A0A3B3ISL2;Q9GZU2;Q9GZU2-2;Q9GZU2-4	0	0	0	0	0	0	0	0	1	0	0
A0A3B3IRY8	0	0	0.667985	0	0	0	0	0.332015	0	0	0
A0A3B3IRZ5;Q8IYE1	0	0	0	0	0	0	0	1	0	0	0
A0A3B3IS06;E7ETY2;Q13428-3;Q13428-7;Q13428-8	0	1	0	0	0	0	0	0	0	0	0
A0A3B3IS13	0	0	0	0	0	0	0	0	1	0	0
A0A3B3IS24;C9JIR6;O75688;O75688-2;O75688-4	0	0	0	0	0	0	1	0	0	0	0
A0A3B3IS40;A0A3B3ISE6;A0A3B3IT25;A0A3B3ITA8;A0A3B3ITA9;A0A3B3ITE7;A0A3B3ITJ7;B3KV94;Q9UGL1;Q9UGL1-2	0	0	1	0	0	0	0	0	0	0	0
A0A3B3IS62;A0A3B3ITD6;A0A3B3ITI5;Q9Y672;S4R350	0	0	0	0	0	0	0	0.304982	0	0.382011	0.313007
A0A3B3IS71;P06400	0	1	0	0	0	0	0	0	0	0	0
A0A3B3IS75;K7EIP0;K7EJD9;K7ESF2;P13686
A0A3B3ISF0;Q659C4;Q659C4-2	0	0	0	0	1	0	0	0	0	0	0
A0A3B3ISF9;P42892;P42892-2;P42892-3;P42892-4	0	0	0	0	0	1	0	0	0	0	0
A0A3B3ISG5;P14735	0	0	0	0	0	0	1	0	0	0	0
A0A3B3ISG8	0	0	0	0	0	0	0	1	0	0	0
A0A3B3ISH6;Q86U38;Q86U38-2	0	0.712894	0	0	0	0	0	0	0	0.287106	0
A0A3B3ISJ2;Q96KQ4	0	0.423019	0	0.576981	0	0	0	0	0	0	0
A0A3B3ISK7;Q6PI48	0	0	0	0	0	0	0	1	0	0	0
A0A3B3ISP1;A0A3B3ITU5;Q92625;Q92625-2	1	0	0	0	0	0	0	0	0	0	0
A0A3B3ISQ4;Q9H6S3	0	0	0	0	0	0	1	0	0	0	0
A0A3B3ISR2;B4DPQ0;P00736	0	0	1	0	0	0	0	0	0	0	0
A0A3B3ISR7;E9PIF2;Q13206	0	0.802431	0	0	0	0	0	0	0	0	0.197569
A0A3B3ISS6	0	0.502573	0	0	0	0	0	0	0	0	0.497427
A0A3B3IST1;B5MD23;O75954	0	0	0	0	0	0	0	0.325677	0	0.27641	0.397913
A0A3B3ISU0;Q02487	0	0.277032	0	0	0	0	0	0	0	0.331282	0.391686
A0A3B3ISV3;P02462	0	0.571254	0	0	0	0	0	0.428746	0	0	0
A0A3B3ISV4	0	0	0	0	0.458138	0	0	0	0.541862	0	0
A0A3B3ISV5;Q8N9N7	0	0	1	0	0	0	0	0	0	0	0
A0A3B3ISV8;A0A6Q8PF19;A0A6Q8PFS9;A0A6Q8PHH0;Q8IZF0	0	0	0.210333	0	0	0	0	0	0.37839	0	0.411277
A0A3B3ISV9;O43414
A0A3B3IT21	0	0.28432	0	0	0	0	0	0	0	0.390574	0.325106
A0A3B3IT28;A0A3B3ITE5;A0A3B3ITF7;A0A3B3ITW6;A0A3B3IU40;A0A3B3IUA1;A0A3F2YNW9;Q12756;Q12756-2;Q12756-3	0	0	0	0	0	0	0	1	0	0	0
A0A3B3IT31;Q9NUN5;Q9NUN5-3	0	0	0	0	0.428677	0	0	0	0.571323	0	0
A0A3B3IT37;Q5SXQ3;Q5SXQ5;Q8IYK4	0	0	0	0	0	0	0	0.525127	0	0.221637	0.253236
A0A3B3IT92;P33991	0	1	0	0	0	0	0	0	0	0	0
A0A3B3ITH3;Q9P2X3	0	0	0	0	0	0	1	0	0	0	0
A0A3B3ITK0;P35442	0	0	0	0	0	0	1	0	0	0	0
A0A3B3ITN0;Q86TP1	0	0	0	0	0	0	1	0	0	0	0
A0A3B3ITN6;D6RBB0;O60683;O60683-2	0	0	0	0.341695	0	0	0	0.658305	0	0	0
A0A3B3ITP4;Q495G5;Q8IVH4	0	0	0	0	0	0	0	1	0	0	0
A0A3B3ITT1
A0A3B3ITT5;P47914	0	0	0	0	0.493891	0	0	0.506109	0	0	0
A0A3B3ITU8;A0A3B3IU04;A0A3F2YNW8;Q14643;Q14643-2;Q14643-3;Q14643-4;Q14643-5;Q14643-6;Q14643-7;Q14643-8	0	0	0	0	0.695749	0	0	0	0	0	0.304251
A0A3B3ITW1;P49841;P49841-2	0	0	0	0	0	0	1	0	0	0	0
A0A3B3IU42;G5EA29;H0YDP6;H0YEL0;O14893;O14893-2;O14893-3	0.658122	0	0	0	0	0.341878	0	0	0	0	0
A0A3B3IU65;A9UHW6;A9UHW6-2;A9UHW6-3;J3KSU6;J3QLD1;J3QLJ5;J3QRZ6	0.569222	0	0	0	0	0.430778	0	0	0	0	0
A0A3B3IU69;F8W717;O00423;O00423-3	1	0	0	0	0	0	0	0	0	0	0
A0A3B3IUA2;B1AHD1;P55769	0	1	0	0	0	0	0	0	0	0	0
A0A3B3IUB1;Q13144	0.648748	0.351252	0	0	0	0	0	0	0	0	0
A0A3B3IUB5;Q8TCT9;Q8TCT9-5	0	0	0	0	1	0	0	0	0	0	0
A0A3B3IUC4;A0A6Q8PFA9;P06280	0	0.288544	0	0	0	0	0	0.711456	0	0	0
A0A3B3IUD2;Q9BUK6;Q9BUK6-2;Q9BUK6-3;Q9BUK6-7	0	0	0	0	0	0	1	0	0	0	0
A0A3B3IUD4;P21453	0	0	0	0	0	0	0	0	0	0.595591	0.404409
A0A3B3IUD7;Q14690	0	0.653586	0	0	0	0	0	0	0	0	0.346414
A0A3Q5ACI7	0	0	0	0	0	0	0	0	0.552627	0	0.447373
A0A494BWY4;Q6IEE7	0	0	1	0	0	0	0	0	0	0	0
A0A494BXY3;E9PLD3;E9PRG8	0	0.250404	0	0	0	0.278517	0	0	0.471079	0	0
A0A494BZU6;A0A494BZW7;A0A494C002;A0A494C0P9;A0A494C0Q2;A0A494C0Q6;A0A494C0W0;A0A494C156;A0A494C1K5;A0A494C1N1;O95453;O95453-2	0	1	0	0	0	0	0	0	0	0	0
A0A494BZV4;A0A494C069;Q08AG5	0	0	0	0	0	0	0	0	0	1	0
A0A494C004;A0A494C0C5;A0A494C0D2;A0A494C0V5;A0A494C141;A0A494C1C6;A0A499FJ53;A6XNE1;F6Y2X3;Q16635;Q16635-2;Q16635-3;Q16635-4;Q16635-5;Q16635-6;Q16635-7;Q16635-8;Q16635-9	0	0.389161	0	0	0	0	0	0.298475	0	0	0.312364
A0A494C023	0	0	0	0	0	0	0	0	0.534209	0.465791	0
A0A494C028;H0Y993;P35659	0	1	0	0	0	0	0	0	0	0	0
A0A494C039	0	0	0.312286	0	0	0	0	0	0.405922	0.281792	0
A0A494C066;B7Z4W5;Q16773	0	0	0	0	0	0	1	0	0	0	0
A0A494C068;A0A494C1K7;E9PGP6;Q9UGJ0;Q9UGJ0-2;Q9UGJ0-3
A0A494C0J7;Q08188	0	0	0	0.323833	0	0	0	0.676167	0	0	0
A0A494C0K7;A0A494C0P0;Q6P2C8;Q6P2C8-2	0	0.77895	0	0	0	0	0	0	0	0	0.22105
A0A494C0M1;P52701	0	1	0	0	0	0	0	0	0	0	0
A0A494C0M2;O95925-3;Q9BQY6;Q9BQY6-2	0	0	0	0	0	0.353089	0	0	0.338614	0.308297	0
A0A494C0N4;H9KV93;Q7Z4L5	0	0	0	0	0	0.450779	0	0	0	0.549221	0
A0A494C0P1;P04150;P04150-10;P04150-2;P04150-3;P04150-6;P04150-8;P04150-9	0	0	0	0	0	0	1	0	0	0	0
A0A494C0Q3	0	0	0.441099	0	0	0	0	0	0.558901	0	0
A0A494C0R8	0.687593	0	0	0	0	0.312407	0	0	0	0	0
A0A494C0X7;D3DSM0;P05107	0	0	0	0	0.526831	0	0	0	0	0.219223	0.253946
A0A494C0Z5;Q9H082	0	0	0.335151	0	0.664849	0	0	0	0	0	0
A0A494C105;Q9H3U5;Q9H3U5-3;Q9H3U5-5;Q9H3U5-6	0	0	0	0	0.468634	0	0	0	0	0.266407	0.264959
A0A494C108;Q8N9T8	0	1	0	0	0	0	0	0	0	0	0
A0A494C115;A0A494C1U4;K7N7A8;P29972;P29972-2;P29972-3;P29972-4	0	0	0.276911	0	0	0	0	0	0	0.277956	0.445133
A0A494C143;Q14689;Q14689-6	0	1	0	0	0	0	0	0	0	0	0
A0A494C146;P50336	0	0	0	0	0	0	0	1	0	0	0
A0A494C164;P52630;P52630-4	0.336991	0	0	0	0	0	0.663009	0	0	0	0
A0A494C165;K7ES25;P12955	0	0	0	0	0	0	1	0	0	0	0
A0A494C167;Q9UHD2	0	0	0	0	0	0	1	0	0	0	0
A0A494C193;Q08E93	0	0	0	0	0	0	0	1	0	0	0
A0A494C1C4;P78552;P78552-2	0	0	0.549106	0	0	0	0	0	0.450894	0	0
A0A494C1F2;P35658;P35658-2;P35658-3;P35658-4;P35658-5	0	1	0	0	0	0	0	0	0	0	0
A0A494C1J1;Q69YQ0;Q69YQ0-2	0	0.306754	0	0	0	0	0	0	0	0.271285	0.421961
A0A494C1J8	0	0.50062	0.49938	0	0	0	0	0	0	0	0
A0A494C1L5;P50851-2	0.358593	0	0	0	0	0	0.641407	0	0	0	0
A0A494C1M4;Q3SY69
A0A494C1N0;P26885	0	0	0	0	1	0	0	0	0	0	0
A0A494C1S7;Q9Y5Q9	0	1	0	0	0	0	0	0	0	0	0
A0A494C1T9;Q6ZRV2	0	0.443126	0	0	0	0	0	0	0	0	0.556874
A0A494C1V1;Q6ZNJ1;Q6ZNJ1-2;Q6ZNJ1-3	0	0	0	0	0	0	1	0	0	0	0
A0A499FI31;Q15020;Q15020-4	0.574633	0.425367	0	0	0	0	0	0	0	0	0
A0A499FI48;P13667	0	0	0	0	1	0	0	0	0	0	0
A0A499FIS5;A0A499FJN1;A0A499FJS1;Q9BUB5;Q9BUB5-2;Q9BUB5-3	0.407199	0	0	0	0	0	0.592801	0	0	0	0
A0A499FIX8;A0FGR8-2;H7BXI1	0	0	0	0	1	0	0	0	0	0	0
A0A499FIY8;C9JC07;C9JZL8;Q96S97	0	0	0	0	0	0	0	0	0	0.369071	0.630929
A0A499FIZ0	1	0	0	0	0	0	0	0	0	0	0
A0A499FJI4;O75592;O75592-2
A0A499FJM4;P08684	0	0	0	0	0.673455	0	0	0	0.326545	0	0
A0A539;A0A589	0	0	0.665216	0	0	0	0	0.334784	0	0	0
A0A590PXD8;Q53SF7-3
A0A590UIU4;A0A590UJ09;A0A590UJ61;A0A590UJC8;A0A590UJF4;A0A590UJG1;A0A590UJH1;A0A590UJS0;A0A590UJT1;A0A590UK11;A0A590UK42;A0A590UK98;Q5VZ66	0	0	1	0	0	0	0	0	0	0	0
A0A590UJ36;A6NDB9
A0A590UJ43;P48729;P48729-3;U3KPX3	0	1	0	0	0	0	0	0	0	0	0
A0A590UJ46	0	0	0	0	0	0	0	0	0.526248	0	0.473752
A0A590UJ50;A0A590UJR3;Q13616	0.444489	0	0	0	0	0	0.555511	0	0	0	0
A0A590UJ62;E7ETH1;Q14003	0	0	0.510717	0	0	0	0	0	0.489283	0	0
A0A590UJ68;A0A590UJR5;A0A590UJS9;A0A590UKA8;Q12959;Q12959-3;Q12959-5;Q12959-6;Q12959-7	0	0	0	0.415286	0	0	0	0	0	0.255554	0.329159
A0A590UJ73;A0A590UJW4;E7EQB3;Q9BSV6	0	0	0	0	0	0	1	0	0	0	0
A0A590UJA9;C9JCW7;C9JE12;Q9BVT8	0	0	0	0	1	0	0	0	0	0	0
A0A590UJB6	0	0	0	0	0	0	0	0	0.465862	0.534138	0
A0A590UJC7;A0A590UK51;O60733;O60733-2
A0A590UJF0;P63092-3	0	0	0	0	0.582817	0	0	0	0	0	0.417183
A0A590UJG2;Q9UPN3-2;Q9UPN3-3
A0A590UJK3;Q14BN4;Q14BN4-2;Q14BN4-3	0	0	0	0	1	0	0	0	0	0	0
A0A590UJK4;A0A590UJP7;A0A590UK01;A0A590UK80;Q13247;Q13247-3	0	1	0	0	0	0	0	0	0	0	0
A0A590UJL0;P08842	0	0	1	0	0	0	0	0	0	0	0
A0A590UJN0;E7ETK1;E9PBA8;Q52LR7;Q9H2F5;Q9H2F5-2	0	1	0	0	0	0	0	0	0	0	0
A0A590UJS8;A0A5F9ZA98;B4DGL8;O75027;O75027-2	0	0	0	0	0	0	0	1	0	0	0
A0A590UJW0;A0A590UKC9;P20585	0	1	0	0	0	0	0	0	0	0	0
A0A590UJW8;Q96J02;Q96J02-2	0	1	0	0	0	0	0	0	0	0	0
A0A590UJY5	0	0	0.243462	0	0	0	0.756538	0	0	0	0
A0A590UK09;A0A590UK73;B1AKN5;B1AKN7;B1AKN8;Q12857;Q12857-2;Q12857-4	0	1	0	0	0	0	0	0	0	0	0
A0A590UK87	1	0	0	0	0	0	0	0	0	0	0
A0A590UKC3;Q9UF12	0	0	0	0	0	0	0	1	0	0	0
A0A5E8;Q99501;Q99501-2;Q99501-3;Q99501-4	0	0	0	0.567711	0	0	0	0.432289	0	0	0
A0A5F9UK94;H0Y360;Q01433;Q01433-2	0.323395	0	0	0	0	0	0.676605	0	0	0	0
A0A5F9UP49;Q9BRK5	0	0	0	0	0	0	0	0	1	0	0
A0A5F9UY30;A0A5H1ZRP2;O43493;O43493-3;O43493-5;O43493-7	0	0	0	0	0.528756	0	0	0	0.471244	0	0
A0A5F9YFS9;C9JBL1;Q9Y6A9	0	0	0	0	1	0	0	0	0	0	0
A0A5F9YLF9	0	0	1	0	0	0	0	0	0	0	0
A0A5F9ZGN6	0	0	0	0	0	0	0	0	0	1	0
A0A5F9ZGW5;C9J8U3;Q7Z2E3-13;Q7Z2E3-5;Q7Z2E3-7;Q7Z2E3-9	0	0	0	0	1	0	0	0	0	0	0
A0A5F9ZGX0	0	0	0	0	0	0	0	0	0	0.550162	0.449838
A0A5F9ZGX3;A0A5F9ZGY3;A0A5F9ZGY4;A0A5F9ZGZ5;A0A5F9ZH19;A0A5F9ZH30;A0A5F9ZHD2;A0A5F9ZHE4;A0A5F9ZHN5;A0A5F9ZHR8;A0A5F9ZHS1;A0A5F9ZI30;A0A5F9ZI40;A0A5F9ZI65;D6RHE1;I6L894;Q01484	0	1	0	0	0	0	0	0	0	0	0
A0A5F9ZGY7	0	0	0	0	0	0	1	0	0	0	0
A0A5F9ZH20;A0A5F9ZH60;A0A5F9ZH84;Q5TF39
A0A5F9ZH43;A0A5F9ZHW6;A4UGR9-4;A4UGR9-5;A4UGR9-6;A4UGR9-7	0	0	0	0	0	0	0	0.268088	0	0.371259	0.360653
A0A5F9ZH85	0	0	0	0	0	0	0	0.590303	0.409697	0	0
A0A5F9ZH93;A0A5F9ZHX9;Q9UHN1	0	0	0	0	0	0	0	1	0	0	0
A0A5F9ZHE0;C9JQD1;P35557	0	0	0	0	0	0	1	0	0	0	0
A0A5F9ZHH6;P19793;P19793-2	0	1	0	0	0	0	0	0	0	0	0
A0A5F9ZHJ0	0	0	0	0	0	0	0	1	0	0	0
A0A5F9ZHM4;P07195	0	0	0	0	0	0	1	0	0	0	0
A0A5F9ZHN2;E7EWD6;Q76L83;Q76L83-2	0	1	0	0	0	0	0	0	0	0	0
A0A5F9ZHN7;Q9NTJ5	0	0	0	0	1	0	0	0	0	0	0
A0A5F9ZHN9;P51648;P51648-2	0	0	0	0	1	0	0	0	0	0	0
A0A5F9ZHP1;Q8N9N2-2
A0A5F9ZHQ6;A0A6I8PIF8;A0A6I8PIP2;A0A6I8PU78;O75071;S4R3Q1	0	0	1	0	0	0	0	0	0	0	0
A0A5F9ZHX8;A0A5F9ZHZ5;F5GYY5;F5H324;P51690	0	0	0	0	1	0	0	0	0	0	0
A0A5F9ZI21;Q92974;Q92974-2;Q92974-3;V9GYF0;V9GYM8	0	0	0	0	0	0	0	0	0	0	1
A0A5F9ZI33	0	0	0	0	0.606443	0	0	0	0	0	0.393557
A0A5F9ZI76;Q32ZL2;Q32ZL2-2	0	0	0	0	0	0	0	0.548656	0	0.451344	0
A0A5H1ZRP4;Q8WX92;Q8WX92-2	0	1	0	0	0	0	0	0	0	0	0
A0A5H1ZRR2;G9CGD6;G9CGD6-2;G9CGD6-3;Q6P9H4
A0A5H1ZRS1
A0A5K1VW60;Q99766	0	0	0	0	0	0	0	1	0	0	0
A0A5K1VW66;P35240;P35240-2;P35240-3;P35240-4;P35240-5;P35240-6;P35240-8	0	0	0.426068	0	0	0	0	0	0	0	0.573932
A0A5K1VW70;P98198;P98198-3	0	1	0	0	0	0	0	0	0	0	0
A0A5K1VW95;P40925;P40925-3	0	0	0	0	0	0	1	0	0	0	0
A0A669KA36;A0A669KB88;B7ZLR4;E7ET55;F5H748;P35670;P35670-2;P35670-4	0	0	0	0	1	0	0	0	0	0	0
A0A669KAV7;A0A669KBH9;M0QXA7;O95785-3	0	1	0	0	0	0	0	0	0	0	0
A0A669KAW1;G3XAD2;Q9BYC5;Q9BYC5-2;Q9BYC5-3	0	0	0	0	0	0	0	0	1	0	0
A0A669KAX3;O76024	0	0	0	0	1	0	0	0	0	0	0
A0A669KAX4;K4DI93;Q13620;Q13620-1;Q13620-3	0.385781	0	0	0	0	0	0.614219	0	0	0	0
A0A669KAX9;Q5T653	0	0	0	0	0	0	0	1	0	0	0
A0A669KAY5;A0A669KB27;A0A669KBH7;C9JTE9;Q9UHQ4;Q9UHQ4-2	0	0	0	0	0.398116	0.256948	0	0	0.344936	0	0
A0A669KB10;A0A669KBG8;Q92538;Q92538-2;Q92538-3	0	0	0	0	0	0.510083	0	0	0.489917	0	0
A0A669KB12;Q09472	0	1	0	0	0	0	0	0	0	0	0
A0A669KB29;K7EQ21;K7EQZ1;Q9P0U4;Q9P0U4-2
A0A669KB41;A0A669KBH5;D6RA31;E7EPV7;P37840;P37840-2;Q16143	0	0	0	0	0	0	1	0	0	0	0
A0A669KB53;A0A669KB56;A0A669KB68;A0A669KBA4;A0A669KBI6;J3KPM9;P42224;P42224-2	0	0	0	0	0	0	1	0	0	0	0
A0A669KB69;Q6Q788	0	0	0	0	0	0	0	0	1	0	0
A0A669KB71;O94842;O94842-2;O94842-3	0	0	0	0	0	1	0	0	0	0	0
A0A669KB81	0	0	0	0	0	0	0	0	1	0	0
A0A669KBE6;A0A669KBF5;Q9NV96;Q9NV96-2;Q9NV96-3	0	0	0	0	0.618935	0	0	0	0	0	0.381065
A0A669KBF4;O00327;O00327-1;O00327-6;O00327-7;O00327-8;O00327-9	0	1	0	0	0	0	0	0	0	0	0
A0A669KBG1	0	0	0.61487	0	0	0	0	0	0.38513	0	0
A0A669KBH1	0	0	0	0	0	0.267901	0	0	0.732099	0	0
A0A669KBH4;Q14999;Q14999-2	0.761527	0.238473	0	0	0	0	0	0	0	0	0
A0A669KBJ1;Q9P202;Q9P202-3;Q9P202-4	0	0	0	0	0	0	0	0	1	0	0
A0A669KBJ4;E7ERL6;Q6P0Q8;Q6P0Q8-2	0	0	1	0	0	0	0	0	0	0	0
A0A669KBJ7;Q9H2P0	0	1	0	0	0	0	0	0	0	0	0
A0A669KBL1;Q93009;Q93009-3	0.66277	0.33723	0	0	0	0	0	0	0	0	0
A0A6E1WB48;Q14541;Q14541-2	0	0	0	0	0	0	0	0.402019	0.597981	0	0
A0A6E1WCP9;H0YGT3;P11474;P11474-2	0	1	0	0	0	0	0	0	0	0	0
A0A6I8PIT3;A0A6I8PIV1;Q9P2J5	1	0	0	0	0	0	0	0	0	0	0
A0A6I8PR89	0	0	0	0	0	0.418421	0	0	0.581579	0	0
A0A6I8PRM6;B1ALU3;O95490-2;O95490-5	0	0	0	0	0	0	0	0	0	0.467258	0.532742
A0A6I8PS32;Q99615	0	0	0	0	0	0	1	0	0	0	0
A0A6I8PTZ8;Q9UL18	0	0	0	0	1	0	0	0	0	0	0
A0A6I8PU65;Q9NUD9	0	0	0.225965	0	0	0	0	0	0.774035	0	0
A0A6Q8JGF9;I3L1H5;I3L3X9;Q9BZG8;Q9BZG8-2;Q9BZG8-3	0	0	0	0	0	0	1	0	0	0	0
A0A6Q8KRG2;Q08379	0	0	0	0	0	0.391613	0	0	0.608387	0	0
A0A6Q8PEX6;A0A6Q8PFB7;A0A6Q8PG86;A0A6Q8PHF4;O95163	1	0	0	0	0	0	0	0	0	0	0
A0A6Q8PEY3;A0A6Q8PGV6;I3L3G9;I3L522;Q9NXR1;Q9NXR1-1	0	0	0.478422	0	0	0	0	0	0.521578	0	0
A0A6Q8PEZ4;A0A6Q8PFG4;A0A6Q8PGL3;A0A6Q8PGS2;A0A6Q8PGU0;A0A6Q8PH79;B4DIH2;Q8TB36;Q8TB36-2	0	0.416809	0	0	0	0	0	0.583191	0	0	0
A0A6Q8PEZ7;A0A6Q8PG30;A0A6Q8PHQ1;Q96S66	0	0	0	0	1	0	0	0	0	0	0
A0A6Q8PEZ8;A0A6Q8PGJ3;J3KNA1;Q12840	0	0.573389	0	0	0	0	0	0	0	0.426611	0
A0A6Q8PF03	0	0	0	0	0	0	1	0	0	0	0
A0A6Q8PF05;B4DHE8;J3KTC1;Q96DH6;Q96DH6-2
A0A6Q8PF14	0	0	0	0	0	0	0	0	1	0	0
A0A6Q8PF33;A0A6Q8PGE8;A0A6Q8PGN5;H3BPK7;P49588	0	0	0	0	0	0	1	0	0	0	0
A0A6Q8PF40;A0A6Q8PFC4;A0A6Q8PFY7;A0A6Q8PG00;A0A6Q8PG04;A0A6Q8PGS4;A0A6Q8PH27;A0A6Q8PH89;Q92734;Q92734-2;Q92734-3;Q92734-4	0	0	0	0	0	0	1	0	0	0	0
A0A6Q8PF44;A0A6Q8PH71;A0A6Q8PHA2;A0A6Q8PHG2;Q27J81;Q27J81-2
A0A6Q8PF62;A0A6Q8PF70;A0A6Q8PF86;A0A6Q8PFJ3;A0A6Q8PG59;A0A6Q8PGB4;A0A6Q8PGP4;A0A6Q8PGY4;A0A6Q8PGY7;A0A6Q8PHA1;A0A6Q8PHC7;A0A6Q8PHH5;A0A6Q8PHK3;A0A6Q8PHP5;Q92562	0	0	0	0	0	0.546147	0	0	0.453853	0	0
A0A6Q8PF83;A0A6Q8PGD1;A0A6Q8PH95;D6REX9;Q8N960;Q8N960-2	0	1	0	0	0	0	0	0	0	0	0
A0A6Q8PF94;O15344	0	0	0	0	1	0	0	0	0	0	0
A0A6Q8PFA4;A0A6Q8PFD4;A0A6Q8PFI6;A0A6Q8PFL5;A0A6Q8PFT9;A0A6Q8PFW1;A0A6Q8PG02;A0A6Q8PG22;A0A6Q8PGB2;A0A6Q8PGF7;A0A6Q8PGH6;A0A6Q8PGT8;A0A6Q8PGW1;A0A6Q8PGY0;A0A6Q8PH15;A0A6Q8PH70;A0A6Q8PH85;Q6UWE0;Q6UWE0-2	0	0	0	0	0	0	1	0	0	0	0
A0A6Q8PFA6;A0A6Q8PG37;A0A6Q8PGH7;A0A6Q8PH57;O00139;O00139-1;O00139-2;O00139-4;O00139-5	0	1	0	0	0	0	0	0	0	0	0
A0A6Q8PFE6;Q9UKA9;Q9UKA9-2;Q9UKA9-3;Q9UKA9-4	0	1	0	0	0	0	0	0	0	0	0
A0A6Q8PFG0;A0A6Q8PGT4;A0A6Q8PH04;A0A6Q8PHN3;A0A6Q8PHP9;Q9P212;Q9P212-2	0	0	0	0	0	0	0	0	1	0	0
A0A6Q8PFI8;P11166	0	0	0	0	0	1	0	0	0	0	0
A0A6Q8PFJ0;P02545	0	1	0	0	0	0	0	0	0	0	0
A0A6Q8PFJ4;A0A6Q8PGV8;O95140	0	0	0	0	0	0	0	1	0	0	0
A0A6Q8PFK4;P50747	0	0	0	0	0	0	1	0	0	0	0
A0A6Q8PFM5;O95831;O95831-3	0	0	0	0	0	0	0	1	0	0	0
A0A6Q8PFU3;P43034	0.391566	0	0	0	0	0	0.608434	0	0	0	0
A0A6Q8PG52;A0A6Q8PH84;P51149	0	0	1	0	0	0	0	0	0	0	0
A0A6Q8PG54;G3XAG5;P51793;P51793-2	0	0	0	0	0	0	0	0	1	0	0
A0A6Q8PG85;Q9HD42	0	0	0	0	0	0	1	0	0	0	0
A0A6Q8PGA8;A0A6Q8PGI6;A0A6Q8PGZ8;A0A6Q8PHH9;P41250	0	0	0	0	0	0	1	0	0	0	0
A0A6Q8PGB0;P24928	0	1	0	0	0	0	0	0	0	0	0
A0A6Q8PGM6;Q9UJY1	0	0	0	0	0	0	0	0	1	0	0
A0A6Q8PGS5;A0A6Q8PHS7;C9JEX3;Q13614;Q13614-2
A0A6Q8PGU6;Q8NB90
A0A6Q8PH13;A0A6Q8PH87;Q86WG5;Q86WG5-3	0	0	0	0	0	0	0	0	0	0	1
A0A6Q8PHA5;E7ETE2;P12081;P12081-4	0.314092	0	0	0	0	0	0.685908	0	0	0	0
A0A6Q8PHC6;P50440	0	0	0	0	0	0	0	1	0	0	0
A0A6Q8PHH2;O95251;O95251-2;O95251-4	0	0.646405	0	0	0	0	0	0	0.353595	0	0
A0A6Q8PHK0;Q14669-2	0	1	0	0	0	0	0	0	0	0	0
A0A6Q8PHM5	0	0	0	0	0	0	0	1	0	0	0
A0A6Q8PHP0;P49902;P49902-2	0	0	0	0	0	0	1	0	0	0	0
A0AV96-2	0	1	0	0	0	0	0	0	0	0	0
A0AVL1;F8WC54;Q13443;Q13443-2	0	0	0	0	0	0	0	1	0	0	0
A0AVT1	0	0	0	0	0	0	1	0	0	0	0
A0MZ66	0	0	0	0	0	0	1	0	0	0	0
A0PJW6	0	0	0	0	0	0	0	1	0	0	0
A0PJX8	0	0	0	0	0.50719	0	0	0	0.49281	0	0
A0PJZ3;C9JND4	0	0	0	0	0	0	0	0	0.605203	0.394797	0
A0RZB6	0	0	1	0	0	0	0	0	0	0	0
A1A4S6;H0Y8W5	0	0.493747	0	0	0	0	0	0	0	0.261357	0.244896
A1A519;A1A519-2;A1A519-3;D6RIE9
A1A5C7;A1A5C7-2;A1A5C7-3;C9J4Z0	0	0.29924	0.223603	0	0	0	0	0	0	0.232922	0.244235
A1IGU5
A1KZ92;A1KZ92-2;A1KZ92-3;H0YAV0;K4DIA6	0	0.702749	0	0	0	0	0	0.297251	0	0	0
A1L0T0	0	0	0.24278	0	0.75722	0	0	0	0	0	0
A1L188
A1L390;A1L390-3	0	0	1	0	0	0	0	0	0	0	0
A1X283	0	0	0	0	0	0	1	0	0	0	0
A2A274;Q99798	0	0	0	0	0	0	0	1	0	0	0
A2A2L4;Q5JX74;Q9NUS5
A2A2N0;O60676	0	0	0	0	0	0	0	1	0	0	0
A2A2Q9;Q9Y312	0	0	0	0	0	0	1	0	0	0	0
A2A2V1;P04156	0	0	0.420508	0	0	0	0	0	0.579492	0	0
A2A2V2;P42696;P42696-2;Q5TCT4	0	1	0	0	0	0	0	0	0	0	0
A2A369;Q8NF50;Q8NF50-2;Q8NF50-3;Q8NF50-4	0	0	0	0	1	0	0	0	0	0	0
A2A3G7	0	0	0	0	0	0	0	0	1	0	0
A2AJT9;A2AJT9-2;A2AJT9-3;F2Z385;H7BXX2	0	1	0	0	0	0	0	0	0	0	0
A2IDC6;Q13084	0	0	0	0	0	0	0	1	0	0	0
A2RRP1	0	0	0.242187	0	0.757813	0	0	0	0	0	0
A2RTX5;B7ZLP8	0.690715	0	0	0	0	0.309285	0	0	0	0	0
A2RU37	0	0	0	0	0	0.259169	0	0	0.740831	0	0
A2RU49	0	0	0	0	0	0	1	0	0	0	0
A2RUC4	0	0	0	0	0	0	1	0	0	0	0
A2RUS2;A2RUS2-2;A2RUS2-4;E5RHH2;E5RI43;E5RIR7;E5RJ42;E9PF32;H0YAY3	0	0	0	0	0	0	0	1	0	0	0
A2VDF0	0	0	0	0	0	0	1	0	0	0	0
A2VDJ0;A2VDJ0-3;A2VDJ0-5	0	0	0.207891	0	0	0	0.792109	0	0	0	0
A3KFL2;Q13868;Q13868-2;Q13868-3	0	1	0	0	0	0	0	0	0	0	0
A3KMH1;A3KMH1-3	0	0	0	0	0	0	0	1	0	0	0
A3KN83;A3KN83-2;A3KN83-3	0	0.314672	0	0	0	0	0.685328	0	0	0	0
A4D1E9	0	0	0	0	0	0	0	1	0	0	0
A4D1P6	0.615011	0	0	0	0	0.384989	0	0	0	0	0
A4D1U4;C9J7X6
A4D2B0	0	0	0	0	0	0	1	0	0	0	0
A4FU69-5;A4FU69-6	0	0	0	0	0	0.330527	0	0	0.669473	0	0
A5D8V6;F5H4Q5	0	0	0	0	0	0	1	0	0	0	0
A5D8V7;A5D8V7-2;K7EN59;K7EPK8	0	0	0	0	0	0	0	1	0	0	0
A5PLN9;A5PLN9-2;A5PLN9-4;A5PLN9-5	0	0	0	0	0	1	0	0	0	0	0
A5YKK6;A5YKK6-2
A6H8Y7;Q6ZRK6;Q6ZRK6-2	0	0	0	0	0	0	0	0	1	0	0
A6NC57;A6NC57-2	0	0	1	0	0	0	0	0	0	0	0
A6NC78	0	0	0	0	0	0	0	1	0	0	0
A6NCC9;C9JHT9;C9JJV1;E9PME3;Q9Y5U2;Q9Y5U2-2	0	0	0.179916	0	0	0	0.820084	0	0	0	0
A6NCE7;H3BTL1;Q9GZQ8	0	0	0	0	0	0.510496	0	0	0.489504	0	0
A6NCS6	0	0	0	0	0	0	0	0	0	0.451113	0.548887
A6ND36
A6ND91	0	0	0	0	0	0	1	0	0	0	0
A6NDG6	0	0	0	0	0	0	1	0	0	0	0
A6NDL8	1	0	0	0	0	0	0	0	0	0	0
A6NDR6	0	0	0	0	0	0	0	0	1	0	0
A6NDU8	0	0	0	0	0	0	1	0	0	0	0
A6NE01;F5GYN0;F5H8C1	0	0	0	0	0	0.441121	0	0	0.558879	0	0
A6NED2;G3V2I3	0	0	0	0	0	0	1	0	0	0	0
A6NEE1	1	0	0	0	0	0	0	0	0	0	0
A6NEL0;A6NL93;P05114	0	1	0	0	0	0	0	0	0	0	0
A6NEL2	0	0.643007	0	0	0	0	0	0	0	0	0.356993
A6NEM2;P51610;P51610-2;P51610-4	0	1	0	0	0	0	0	0	0	0	0
A6NEY8	0	0	0	0	0	0	1	0	0	0	0
A6NF36	0	0	0	0	0	0	0	1	0	0	0
A6NFQ9;F8W8I8	0	1	0	0	0	0	0	0	0	0	0
A6NFS0;Q9NSD4;Q9NSD4-2	0	0.474897	0.525103	0	0	0	0	0	0	0	0
A6NFV8;D6RCT8	0	0	0	0	0	0	0	0	1	0	0
A6NFX8;Q9UKK9	0	0	0	0	0	0	1	0	0	0	0
A6NFY7	0	0	0	0	0	0	0	1	0	0	0
A6NG10;K7EIJ0;K7EMC9;K7ENL2;Q969T9	0	0	0	0	0	0	1	0	0	0	0
A6NGA6;Q5H9D4;Q9Y5S8;Q9Y5S8-2;Q9Y5S8-3	0	0	0	0	0	0	0	0	1	0	0
A6NGJ0;P51808
A6NGL4;P0CW00	0	0	0.486559	0	0	0	0	0	0	0.513441	0
A6NGQ3;Q5VST9;Q5VST9-2;Q5VST9-6	0	0	0	1	0	0	0	0	0	0	0
A6NGU5;B5MCK8;P19440	0	0	0	0	0	0	0	0	0	0.438181	0.561819
A6NGW1;O95070	0	0	0	0	0.398625	0	0	0	0.601375	0	0
A6NGY7;Q9H694-2	0	0.513543	0	0	0	0	0	0	0	0.226342	0.260115
A6NH11	0	0	0	0	0	0.343875	0	0	0.656125	0	0
A6NHG8;Q13114	0	0	0	0	1	0	0	0	0	0	0
A6NHJ8;A6NND8;C9JAL0;C9K0F7;H7C3I5;O95825;O95825-2	0	0	0	1	0	0	0	0	0	0	0
A6NHR9;A6NHR9-2	0	0.702916	0.297084	0	0	0	0	0	0	0	0
A6NI28;E9PJK4	0	0.649777	0	0	0	0	0	0	0	0	0.350223
A6NI72;A8MVU1;C9J155;P14598;P14598-2	0	0	0	0	0	1	0	0	0	0	0
A6NIH7	0	0	0	0	0	0	1	0	0	0	0
A6NIT2;A6NMN0;P46020;P46020-2;P46020-3	0.541088	0	0	0	0	0	0.458912	0	0	0	0
A6NIV6	0	0	1	0	0	0	0	0	0	0	0
A6NIZ0;Q9GZM8;Q9GZM8-2;Q9GZM8-3
A6NJA2;P54578;P54578-2;P54578-3	1	0	0	0	0	0	0	0	0	0	0
A6NJZ7;A6NNM3;J3KP16;Q9UFD9	0	0	0	0.577604	0	0.422396	0	0	0	0	0
A6NK44;H7C348	0	0	0	0	0	0	0	0	0	0	1
A6NKB5-2	0	0	0	0	0	0	0	0	0.645926	0.354074	0
A6NKD9	0	0.278377	0	0	0	0	0	0	0	0.344278	0.377346
A6NKN8	0	0	0	0	0	0	1	0	0	0	0
A6NKZ2;P51606	0	0	0	0	0	0	1	0	0	0	0
A6NLH6;Q9P003	0	0	0	0	1	0	0	0	0	0	0
A6NLN1;P26599;P26599-2;P26599-3	0	1	0	0	0	0	0	0	0	0	0
A6NLP5	0	0	0	0	0	0	1	0	0	0	0
A6NMH6;Q92599;Q92599-2;Q92599-4	0	1	0	0	0	0	0	0	0	0	0
A6NML8;C9J6U3;O60879-2	0.392755	0	0	0	0	0	0.607245	0	0	0	0
A6NMQ3;O43768;O43768-2;O43768-3;O43768-4;O43768-9;Q5T5H1	0	0	0	0	0	0	1	0	0	0	0
A6NMV7	0	0	1	0	0	0	0	0	0	0	0
A6NMZ5	0	0	0.364813	0	0	0	0	0	0	0	0.635187
A6NMZ7;A6NMZ7-2	0	1	0	0	0	0	0	0	0	0	0
A6NN50;O75147;O75147-1;O75147-2;O75147-4	0.395415	0	0	0	0	0.227611	0	0	0.376974	0	0
A6NNK5;Q12888;Q12888-2;Q12888-3	0	0.695315	0.304685	0	0	0	0	0	0	0	0
A6NP16;E7ERM3;Q4VCS5;Q4VCS5-2	0	1	0	0	0	0	0	0	0	0	0
A6NP52;O60831	0	0	0	0	1	0	0	0	0	0	0
A6PVD3;P48436;P56693;P56693-2;P57073	0	0	0.277281	0	0	0	0	0	0.722719	0	0
A6PVK5
A6PVU8;Q6UWW7;Q9NNX1;Q9NNX1-2;Q9NNX1-3
A6PVY1;A6PVY2;A6PVY3;A6PVY3-2	0	0	0	0	0	0	1	0	0	0	0
A6PW57;Q99755;Q99755-3;Q99755-4	0	0	0.238671	0	0	0	0	0	0	0.415941	0.345388
A6PWM2;Q6UXH1;Q6UXH1-2;Q6UXH1-3;Q6UXH1-4;Q6UXH1-5;Q6UXH1-6	0	0	0	0	1	0	0	0	0	0	0
A6XND0;A6XND1;B3KWK7;C9JMX4;H0Y5K2;P17936;P17936-2	0	0	0	0	0.596324	0	0	0	0	0	0.403676
A7E2V4;A7E2V4-3;A7E2V4-4;A7E2V4-5;S4R393;S4R410	0.356252	0	0	0	0	0.233288	0	0	0.410461	0	0
A7KAX9;A7KAX9-2	1	0	0	0	0	0	0	0	0	0	0
A7MCY6
A7XZE4;Q3SX28	0	0.587283	0	0	0	0	0	0	0	0.412717	0
A8CG34;A8CG34-2	0	1	0	0	0	0	0	0	0	0	0
A8DPD7;Q9C0D3	0	0	0	0	0	0	0	0	0	0	1
A8MPP7;A8MPY5;E7ETV6;Q9UPE1;Q9UPE1-2;Q9UPE1-3;Q9UPE1-4	0	0	0.357259	0	0	0	0	0	0.642741	0	0
A8MQ02	0	1	0	0	0	0	0	0	0	0	0
A8MQB8;G3V0J0;Q06787-2	0	0	0.585766	0	0	0	0	0	0	0.414234	0
A8MSI8;D6RAR2;D6RFL2;J3KTA2	0	0	0	0	0	0	0	0.708916	0	0	0.291084
A8MSY1;C9JYJ2;Q8IVN3	0	0	0.410181	0	0	0	0.589819	0	0	0	0
A8MT69;A8MT69-2;A8MT69-3;J3QR01;J3QRS1	0	0	0.712247	0	0	0	0	0.287753	0	0	0
A8MTT3	0	0	0	0	0	0	0	1	0	0	0
A8MUM1;Q53HC9	0	0	0	1	0	0	0	0	0	0	0
A8MVV6;E9PN41;E9PPX8;E9PSH3;J3KQ42;O14817	0	0	0	0	0	0	0	0	0	0	1
A8MVZ6;Q96G01;Q96G01-3;Q96G01-4	0	0	0	0	0	0	0	0	1	0	0
A8MWD9;F5H013;P62308;Q49AN9	0	1	0	0	0	0	0	0	0	0	0
A8MXB7	0.366221	0	0	0	0	0	0.633779	0	0	0	0
A8MXV4	0	0	0	0.429218	0	0	0	0.570782	0	0	0
A8MYA3;J3KQ25;Q8N6M9
A8MYZ0	0	0	0.360075	0	0	0	0	0.639925	0	0	0
A8TX70;A8TX70-2;E9PAL5	0	1	0	0	0	0	0	0	0	0	0
A9J4F5;O00488	0	0	0	0	0	0	0	0.45769	0	0	0.54231
A9X3U0;Q96GF1
A9Z1X7;E9PCT1;Q8IYB3;Q8IYB3-2	0	1	0	0	0	0	0	0	0	0	0
B0QY89;Q9Y262	0.653204	0	0	0	0	0.346796	0	0	0	0	0
B0QY95;Q9NQG6	0	0	0.479439	0.520561	0	0	0	0	0	0	0
B0QYF8;P02144	0	0	1	0	0	0	0	0	0	0	0
B0QYK0;Q01844;Q01844-3;Q01844-5;Q01844-6
B0QYN7;H3BQQ9;P63279	0	0	0	0	0	0	1	0	0	0	0
B0QYP2;O95931	0	0.482549	0	0	0	0	0	0	0	0.262742	0.254709
B0QYW5;F6RTR7;O43808	0	0	0	0.47616	0	0	0	0.52384	0	0	0
B0QZ18;F2Z2V0;Q99829	0	0	0	0	0	0	1	0	0	0	0
B0QZA9;Q6QHF9;Q6QHF9-4	0	0	0.445504	0	0	0	0	0.554496	0	0	0
B0YIW2;P02656	0	0.526309	0	0	0	0	0	0	0	0	0.473691
B1AH87;P30536	0	0	0	0.377415	0	0	0	0.622585	0	0	0
B1AHA8;P09601	0	0	0	0	1	0	0	0	0	0	0
B1AHB1	1	0	0	0	0	0	0	0	0	0	0
B1AHL2;P23142;P23142-2;P23142-3;P23142-4	0	0	0	0	0	0	1	0	0	0	0
B1AHR2	0	0	0.207472	0	0	0	0.792528	0	0	0	0
B1AJQ6;Q86Y82	0	0	0	0	0	0	0	0	1	0	0
B1AJS1;O14525;O14525-2;O14525-3	0	0	0	0	0	0	0	0.528	0	0	0.472
B1AK53	0	0	0	0	0	0	0	0	0	0.487547	0.512453
B1AK61;Q5VTY9;Q5VTY9-2;Q5VTY9-3;Q5VTY9-5;Q5VTY9-6;Q5VTY9-7	0	0	0	0	0	0.439339	0	0	0.560661	0	0
B1AK88;P47756-2
B1AKC9;P29323;P29323-2;P29323-3	0.375951	0	0	0	0	0.245071	0	0	0.378977	0	0
B1AKG0;Q03591	0	0	0.185809	0	0	0	0	0	0.442332	0.371859	0
B1AKI6;Q9NUK0;Q9NUK0-2	1	0	0	0	0	0	0	0	0	0	0
B1AKL4;Q9NRA8;Q9NRA8-2;Q9NRA8-3	0	0	0	0	0	0.32564	0	0	0.395627	0.278733	0
B1AKR6;Q9NP97	0.674848	0	0	0	0	0.325152	0	0	0	0	0
B1AL05;H0Y6Y8;Q8N983;Q8N983-2;Q8N983-3;Q8N983-4;Q8N983-6;Q8N983-7	0	0	0	0	0	0	0	1	0	0	0
B1AL69;Q7L3B6	0	0	0	0	0	0	1	0	0	0	0
B1ALA9;P60891	1	0	0	0	0	0	0	0	0	0	0
B1ALD1;Q9Y6B7	0	0	0	0	0	0.568786	0	0	0	0.431214	0
B1ALM5;Q9P0T7	0	0	0	0	0.523908	0	0	0	0.476092	0	0
B1ALY0;Q8IXS6-2	0	0	0	0	0	0	1	0	0	0	0
B1AM21	0	0.323517	0	0	0	0	0	0.324729	0	0	0.351754
B1AM27;O14795;O14795-2	0	1	0	0	0	0	0	0	0	0	0
B1AM31;Q5T1B0	0	0	0	0	0	0	0	0	1	0	0
B1AMI2	0	0.458411	0	0	0	0	0	0.541589	0	0	0
B1AMN7;Q9P2B4	0	0	0	1	0	0	0	0	0	0	0
B1AMS2;Q14141;Q14141-2;Q14141-4	0	1	0	0	0	0	0	0	0	0	0
B1AMT9;B1AMU0;B1AMU5;Q969W1;Q969W1-2;Q969W1-3;Q969W1-4
B1AMW1;H0YDI1;P19256;P19256-2;P19256-3	0	0	0	0	0	0	0	0	0	0.403217	0.596783
B1ANE6	1	0	0	0	0	0	0	0	0	0	0
B1ANH0;B1ANH2;Q16774;Q16774-2
B1APN9;O75335	0.642447	0.357553	0	0	0	0	0	0	0	0	0
B1APR7;Q99504;Q99504-2;Q99504-3;Q99504-4;Q99504-5	1	0	0	0	0	0	0	0	0	0	0
B1AQK6;B1AQK7;E9PDR3;F6RH32;Q00975;Q00975-2	0	0	0	0	0	0	0	0	1	0	0
B1AVT0;P49760;P49760-3	0	0.627243	0	0	0	0	0	0	0	0.372757	0
B1AXG1;B4DG22;B7ZB17;P51812	0	0	0	0	0	0	1	0	0	0	0
B2RC85;B2RC85-2;H0YFY2;P0C881	0	0	0	0	0	0.405685	0	0	0.594315	0	0
B2WTI3;B2WTI4;K7EJU9;Q6NYC1;Q6NYC1-2;Q6NYC1-3	0	0	0	0	0	0	1	0	0	0	0
B3EWG3;B3EWG5;B3EWG6	0	0	0.230937	0	0	0	0.769063	0	0	0	0
B3KP42	0	0.26885	0	0	0	0	0	0.73115	0	0	0
B3KP96;H0Y626;J3QKY5;K7EL43;K7ENN8;O95361;O95361-2	0	0	0	0	0	0.538534	0	0	0	0	0.461466
B3KS81	0	0	0	0	0	0.297947	0	0	0.702053	0	0
B3KT41;Q496J9	1	0	0	0	0	0	0	0	0	0	0
B3KTM8;H0YLJ3;Q9UBU8-2	0	1	0	0	0	0	0	0	0	0	0
B3KUS5;Q70CQ3	0	0	0	0.287524	0	0	0	0.368028	0	0	0.344448
B3KVY5;F5GWA4;F5GWK6;F5H268;Q9H3F6;Q9H3F6-2;Q9H3F6-3	0	0.303136	0	0	0	0	0	0	0	0.341599	0.355265
B3KY94;O14735;O14735-3	0	0	0	0	1	0	0	0	0	0	0
B4DDD6	0	0	0	0	0	0	1	0	0	0	0
B4DDF4;B4DUT8;Q99439	0	0	0	0	0	0	1	0	0	0	0
B4DDX3;H7C1L4;Q8TCB7	1	0	0	0	0	0	0	0	0	0	0
B4DEE8;P16455
B4DEN4;B8ZZ56;E7EV05;E9PFU9;Q8WV99;Q8WV99-2
B4DFC0;E9PMV6;E9PR50;G3V1B4;H0YD20;H0YE53;H0YEL8;Q9UGK8;Q9UGK8-2	0	0	0.298047	0	0	0	0.701953	0	0	0	0
B4DI03;K7EJQ7;Q9BY50	0	0	0	0	1	0	0	0	0	0	0
B4DJ07	0	0	0.219183	0	0	0.295447	0	0	0.48537	0	0
B4DJ62;C9JM82;E7EPG2;E7EQM7;E7EX32;F8W9E5;G3XAH0;Q99719;Q99719-2	0	1	0	0	0	0	0	0	0	0	0
B4DJV2;O75390	0	0	0	0	0	0	0	1	0	0	0
B4DJV5;Q13610	0.368213	0	0	0	0	0	0.631787	0	0	0	0
B4DK77;Q9H6K4	0	0	0	0	0	0	0	1	0	0	0
B4DL54	0	0	0	0	0	0	1	0	0	0	0
B4DLJ1	0	1	0	0	0	0	0	0	0	0	0
B4DLN1	0	0	0	0	0	0	0	0.693616	0	0	0.306384
B4DLP0;B8ZZF7;O00338;O00338-2
B4DR61;P61619	0	0	0	0	0	0	0	1	0	0	0
B4DR80;Q9Y6E0;Q9Y6E0-2
B4DTC4;C9J6H0;C9JAU4;C9JYH7;E7EX82;F8WDA4;G5E9U7;Q8NDX5;Q8NDX5-2;Q8NDX5-3;Q8NDX5-4;Q8NDX5-5;Q8NDX5-6;Q8NDX5-7	0	0	0	0	0	0	1	0	0	0	0
B4DUC8;Q13126	0	0	0	0	0	0	1	0	0	0	0
B4DUJ5;Q8IWP9	0	0	0	0	0	0	0	0	1	0	0
B4DVN3;E7ESC7;Q7L5Y9;Q7L5Y9-3	1	0	0	0	0	0	0	0	0	0	0
B4DVT3;Q96SY0	0	1	0	0	0	0	0	0	0	0	0
B4DXZ6;P51114	0	0	0	0	1	0	0	0	0	0	0
B4DYU2;H3BQV3;Q96MW5	0.39632	0	0	0	0	0	0.60368	0	0	0	0
B4DYY6;Q75T13;Q75T13-2;Q75T13-3	0	0	0	0	0.441409	0	0	0.284678	0	0.273913	0
B4DZK5;Q9HAQ2;Q9HAQ2-2	0	0	0	0	0	0	0	0	1	0	0
B4E0E3;G3V1M5;Q9H6X4;Q9H6X4-2;Q9H6X4-3	0	0	0	0	0	1	0	0	0	0	0
B4E0T2;P50542;P50542-4	0	0	0	1	0	0	0	0	0	0	0
B4E107;F5GXE4;O95260-2	0	0	0	0	0	0	1	0	0	0	0
B4E1G1;Q9BUN8;Q9BUN8-2	0	0	0	0	0.629192	0	0	0	0.370808	0	0
B4E1Q4;O14730	1	0	0	0	0	0	0	0	0	0	0
B4E1Z4	0	0	0.310667	0	0.689333	0	0	0	0	0	0
B4E2Q0;P98194;P98194-4	0	0	0	0	0	0	0	0	1	0	0
B4E3T4;Q93062;Q93062-2;Q93062-3;Q93062-4;Q93062-5	0	1	0	0	0	0	0	0	0	0	0
B5MC20;P0C870	0	0	0	0	0	0	1	0	0	0	0
B5MC22;Q9UDX5	0	0	0	0	0	0	0	1	0	0	0
B5MC35;B5MCA1;B5MD16;Q96G28;Q96G28-2	0	1	0	0	0	0	0	0	0	0	0
B5MC51;P53671-3	0	0.542571	0	0	0	0	0	0	0	0	0.457429
B5MC53;B5MCF8;E7EX18;G5E9F5;P39210	0	0	0	0	0	0	0	1	0	0	0
B5MCF4;C9JDC5;P05230;P05230-2	0	0	0	0	0	0	1	0	0	0	0
B5MCF9;O00541;O00541-2	0	1	0	0	0	0	0	0	0	0	0
B5MCH6	0	0	0.27035	0	0	0	0	0	0.422362	0.307288	0
B5MCN7;Q15788;Q15788-2;Q15788-3
B5MCQ6;B5MCU6;B5MCV5;E7ETT9;Q96DB2;Q96DB2-2	0	0	0	0	0.583354	0	0	0	0	0	0.416646
B5MCX7;C9JX82;D3YTC9;F8WB76;H7C3L3;Q6NXT1;Q6NXT1-2	0	0	1	0	0	0	0	0	0	0	0
B5MD46;F8W9Y7;F8WCD1;H0Y2U5;H0Y5R9;H7C1Q1;H7C471;Q9BXI6;Q9BXI6-2	0	0	0.191465	0	0	0	0	0	0.288177	0.285426	0.234932
B5MDF5;J3KQE5;P62826	0	0	0	0	0	0	1	0	0	0	0
B5MDL5;P53778;P53778-2	0	0	0.396316	0	0	0	0.603684	0	0	0	0
B5MDU6;Q9H6V9;Q9H6V9-2	0	0	0.472971	0	0.527029	0	0	0	0	0	0
B5ME97;E7EW69;E7EX04;Q9P0V9;Q9P0V9-2;Q9P0V9-3	0	0.385844	0	0.614156	0	0	0	0	0	0	0
B5MEF5;Q8TER0;Q8TER0-3;Q8TER0-4;Q8TER0-5	0	0	0	0	0.341523	0	0	0	0	0.265464	0.393013
B7WNH4;E9PLH2;E9PNA8;E9PP42;M0QYU9;M0R0R3;M0R2G5;Q9BQ49	0	0	0	0	0	0	0	0	1	0	0
B7WNR7;Q5HYL7-4	0	0	0	0	0	0	0	1	0	0	0
B7WP74;Q9HCG8	0	1	0	0	0	0	0	0	0	0	0
B7WPE2;Q32P44	0.355928	0	0	0	0	0	0.644072	0	0	0	0
B7WPG3;C9IYN3;Q8WVV9;Q8WVV9-4;Q8WVV9-5;V9GYK2	0	1	0	0	0	0	0	0	0	0	0
B7WPL0;Q9NVN3;Q9NVN3-1;Q9NVN3-3	0	0	0	0	0	0.540969	0	0	0.459031	0	0
B7WPL9;F8W9A8;Q6PFW1;Q6PFW1-2;Q6PFW1-3;Q6PFW1-4;Q6PFW1-5;Q6PFW1-6;Q6PFW1-7	0	1	0	0	0	0	0	0	0	0	0
B7Z278;Q8WZA2;Q8WZA2-2;Q8WZA2-3;Q8WZA2-4;Q8WZA2-5
B7Z2R2;P14927;P14927-2	0	0	0	0	0	0	0	1	0	0	0
B7Z2R7;Q5T8D3;Q5T8D3-2;Q5T8D3-3	0	0	0	1	0	0	0	0	0	0	0
B7Z2X5;H0YDC6
B7Z493;E9PJX4;F8VWL3
B7Z4L1;B7Z4U3;E7EPD9;E7EPW5;E9PCV1;G3XAH9;H7BXS2;Q9NRC1-2;Q9NRC1-3;Q9NRC1-4;Q9NRC1-5;Q9NRC1-6	0	0	0	0	0.503413	0	0	0.496587	0	0	0
B7Z4S1	0.604458	0	0	0	0	0.395542	0	0	0	0	0
B7Z4W8;E9PD09;Q96HH9;Q96HH9-2;Q96HH9-3;Q96HH9-4;Q96HH9-5	0	0	0.438934	0	0	0	0	0	0.561066	0	0
B7Z5P7;O60711;O60711-2	0	0	1	0	0	0	0	0	0	0	0
B7Z6D5;Q96GQ7	0	1	0	0	0	0	0	0	0	0	0
B7Z6J7;H7C148;O75175
B7Z6Q0;Q12980
B7Z7D2;E9PQY3;P11117	0	0	0	0	0.47649	0	0	0	0	0.283326	0.240184
B7Z7P8;P62495;P62495-2
B7Z8H2;O14717;O14717-2;O14717-3;O14717-4;O14717-5;O14717-6;Q7Z3E4	0	0	0	0	0	0	0	0.552765	0	0.447235	0
B7Z8Q8;Q6NUS8	0	0	0	0	1	0	0	0	0	0	0
B7Z931	1	0	0	0	0	0	0	0	0	0	0
B7Z9C2;F5H4R6;F8VV59;F8VY35;F8W020;F8W0J6;F8W118;F8W543;H0YH88;H0YHC3;H0YIV4;P55209;P55209-2
B7Z9I1;P11310;P11310-2;Q5T4U5	0	0	0	0	0	0	0	1	0	0	0
B7ZAP0;F5H8L0;Q5R372-5;Q5R372-6;Q5R372-7;Q5R372-8	0	0	0	0	0	0	1	0	0	0	0
B7ZAQ6;B7ZAQ6-2;B7ZAQ6-3;P0CG08	0	0	0	0	1	0	0	0	0	0	0
B7ZBB8	0.385234	0	0	0	0	0	0.614766	0	0	0	0
B7ZBC8;B7ZBC9;O75449	0	0	1	0	0	0	0	0	0	0	0
B7ZC38;Q9NR46	0	0	0	0	0	0	1	0	0	0	0
B7ZKQ9;Q8WTV0-2;Q8WTV0-4	0	0	0	0	0.363234	0	0	0	0	0.284866	0.3519
B7ZL88;Q8N8Q8	0	0	0	0	0	0	0	1	0	0	0
B7ZLQ8;E5RJM0;Q17RY0;Q17RY0-2	0	0	0	0	0	0	0	0	1	0	0
B7ZM68;Q6ZNL6;Q6ZNL6-2	0	0	0.428519	0	0	0	0	0	0.571481	0	0
B8ZZ19;H0Y3U0;P20472	0	0	0	0	0	0	1	0	0	0	0
B8ZZ47;H0Y714;Q96G21	0	1	0	0	0	0	0	0	0	0	0
B8ZZ50;B9A044;C9JEL3;O60573;O60573-2	0	0	1	0	0	0	0	0	0	0	0
B8ZZ98;Q8WVK2	0	0.396763	0	0	0	0	0	0	0.603237	0	0
B8ZZ99;F8WCZ3;Q96NT0;Q96NT0-2	0	0	0	0	0.531721	0	0	0	0.468279	0	0
B8ZZD4;Q86VP1;Q86VP1-2;Q86VP1-3;Q86VP1-4	0	0	0	0	0	0	0	0	0	0.500777	0.499223
B8ZZF5;C9J5M4;Q9H8M9	0	0	0	0	0	0	0	0	0	0.433619	0.566381
B8ZZJ6;H7C1S9;Q8TD22	0	0	0	0	0	0	0	1	0	0	0
B8ZZK5;O43924
B8ZZQ6;P06454;P06454-2	0	0	0	0	0	0	1	0	0	0	0
B8ZZU8;Q15370;Q15370-2	0	0	0	0	0	0	1	0	0	0	0
B8ZZV9;B8ZZX2;Q9H8M1;Q9H8M1-2	0	0	0	0	0	0	0	1	0	0	0
B8ZZY8	1	0	0	0	0	0	0	0	0	0	0
B8ZZZ1;F8W8K9;G5E966;Q96PC3;Q96PC3-2;Q96PC3-3;Q96PC3-4	0	0	0	0	0	0	0	0	1	0	0
B9A063;Q6PIF6	0	0	0	0	0	0	0	0.471642	0.528358	0	0
B9EGA3;J3KMX2;Q92925;Q92925-2;Q92925-3	0	1	0	0	0	0	0	0	0	0	0
B9EJG8;B9EJG8-2;D6RAQ9;D6RDW6	0	0	0	0	0	0	0	0	1	0	0
B9ZVN9;O95602	0	0.677197	0	0	0	0	0	0	0	0	0.322803
C4AMC7;Q6VEQ5	0	0	0	0	0	0.526315	0	0	0.473685	0	0
C4B7M2;Q96JI7;Q96JI7-2;Q96JI7-3	0	0	0.372514	0	0	0	0	0	0.627486	0	0
C4P0D6;C4P0D8;Q99598	0	0	0	0	0	0	1	0	0	0	0
C9IYN7;C9J2D6;C9J9N8;C9JA82;C9JEX8;C9JLH5;Q0PNE2;Q0PNE2-2	1	0	0	0	0	0	0	0	0	0	0
C9IYT0	0	0.428492	0	0	0	0	0	0	0.571508	0	0
C9IZ93;C9J9P8;C9JF62;Q969M7;Q969M7-2;Q969M7-3;Q969M7-7
C9IZF6;P41247	0	0	0	0	0	0	0	1	0	0	0
C9IZU8;C9J9T0;Q96AT9	0	0	0	0	0	0	1	0	0	0	0
C9J050;C9JEJ2;P49585	0	0	1	0	0	0	0	0	0	0	0
C9J066;E9PN67;Q8N4C6;Q8N4C6-10;Q8N4C6-11;Q8N4C6-2;Q8N4C6-4;Q8N4C6-5;Q8N4C6-6;Q8N4C6-7;Q8N4C6-9	0	0	1	0	0	0	0	0	0	0	0
C9J0A4;P57723;P57723-2	0	0	0	0	0	0	0	0	0.476466	0.523534	0
C9J0A7;Q9UQN3;Q9UQN3-2	0	0	0	0	0	0	1	0	0	0	0
C9J0I9;Q86WB0;Q86WB0-2;Q86WB0-3	0	0.527062	0	0.472938	0	0	0	0	0	0	0
C9J0J0;Q96EE4	0	0	0	0	0	0	0	0	1	0	0
C9J0J7;G5E9Q6;P35080-2	0	0	0	0	0	0	1	0	0	0	0
C9J0K6;P30626;P30626-2;P30626-3	0	0	0	0	0	0	1	0	0	0	0
C9J159;F5H6W4;Q9H992
C9J165	0.709896	0	0	0	0	0	0	0	0.290104	0	0
C9J1C6;Q9P0P0	0.322439	0	0	0	0	0	0.677561	0	0	0	0
C9J2C0;Q9NY65;Q9NY65-2
C9J2P9;Q75N03;Q75N03-2	0	0	0	0	0	0	0	0	0	0.520819	0.479181
C9J2Y9;P30876	0	1	0	0	0	0	0	0	0	0	0
C9J365;C9JA28;Q9UNL2;Q9UNL2-2	0	0	0	0	0	0	0	0	0.57423	0	0.42577
C9J3D7;Q9UKG9;Q9UKG9-3	0	0	0	1	0	0	0	0	0	0	0
C9J3R8;E7ETS9;O60513	0	0	0	0	0	0	0	0	1	0	0
C9J406	0	0	0	0	0	0	0	1	0	0	0
C9J494;Q9H000;Q9H000-2
C9J4X5;Q96EU6;Q96EU6-2;Q9H160;Q9H160-2	0	1	0	0	0	0	0	0	0	0	0
C9J4Z3;P61513	0	0	0	0	0	0	0	1	0	0	0
C9J555;J3QLM1;J3QLS1;Q14849	1	0	0	0	0	0	0	0	0	0	0
C9J597;C9JF31;Q9BV87	0.742608	0.257392	0	0	0	0	0	0	0	0	0
C9J5D1;E7EQ69;Q9GZZ1	0	0	0	0	0	0.516485	0	0	0.483515	0	0
C9J5N1;Q9BTE6;Q9BTE6-2;Q9BTE6-3	0	0	0	0	0	0	1	0	0	0	0
C9J6G3;C9J7M1;O95749	0.355416	0	0	0	0	0	0.644584	0	0	0	0
C9J6K0;Q13103	0	0	0.50929	0	0	0	0	0	0	0.49071	0
C9J6K3;C9JM54;Q9HC52	0	1	0	0	0	0	0	0	0	0	0
C9J6P4;Q7Z2W4	0	0	0	1	0	0	0	0	0	0	0
C9J6W0	0	0	0.610937	0	0	0	0	0	0.389063	0	0
C9J712;P35080	0.402902	0	0	0	0	0	0.597098	0	0	0	0
C9J758;Q969T7;Q969T7-2	0	0	0	0	0	0	1	0	0	0	0
C9J798;E5RK78;E7ERK1;F5GXT2;F8W6L0;O43374;O43374-2	0	1	0	0	0	0	0	0	0	0	0
C9J7E5;Q9Y5L0;Q9Y5L0-1	0	0	0	0	0	0	1	0	0	0	0
C9J7E8;Q9UL63;Q9UL63-2	1	0	0	0	0	0	0	0	0	0	0
C9J7K9;C9J9P4;H7C5I5;O15162;O15162-2	0	0	0	0	0.565989	0	0	0	0	0	0.434011
C9J813	0	1	0	0	0	0	0	0	0	0	0
C9J8S2;Q99969	0	0	0	0	1	0	0	0	0	0	0
C9J8T4;C9JYN7;O43567	0	0	0	0	0	0	0	0	0.415049	0.584951	0
C9J975;E7ESL9;Q96P47;Q96P47-2;Q96P47-3;Q96P47-4;Q96P47-6	0.670654	0	0.329346	0	0	0	0	0	0	0	0
C9JA08;Q96D46	0.644731	0.355269	0	0	0	0	0	0	0	0	0
C9JA90	0	0	0	0	0	0	0	0	1	0	0
C9JAX1;Q16595	0	0	0	0	0	0	0	1	0	0	0
C9JB28;C9JPS5;Q6ZMH5	0	0	0	0	0.665211	0	0	0	0	0	0.334789
C9JB30;Q9UPY8	0	0	0	0	0	0	1	0	0	0	0
C9JBG5;E9PMC3;F5H8L4;Q8NBJ9;Q8NBJ9-2	0	0	0	0	0	1	0	0	0	0	0
C9JBI3;P78330	0	0	0	0	0	0	1	0	0	0	0
C9JBY7;Q9Y291	0	0	0	0	0	0	0	1	0	0	0
C9JCC6;E9PQX9;Q14919;Q14919-2	0	1	0	0	0	0	0	0	0	0	0
C9JCU6;F2Z2B3;F8WCP4;Q12851;Q12851-2	0.717487	0.282513	0	0	0	0	0	0	0	0	0
C9JD37	0	0	0	0	0	0	0	1	0	0	0
C9JDZ2;Q9NVQ4;Q9NVQ4-2;Q9NVQ4-3	0	0	1	0	0	0	0	0	0	0	0
C9JEG3;Q9UBQ6	0	0	0	0	0	0	0	0	1	0	0
C9JEG4;H7BZE4;H7C482;Q01449	0	0	0	0	0	0.270631	0	0	0.729369	0	0
C9JEH3;C9JG97;Q13685	0	0	0	0	0	0	1	0	0	0	0
C9JEK0;C9JP86;Q08AI8	1	0	0	0	0	0	0	0	0	0	0
C9JER6;P61366	0	0	0.367214	0	0	0	0	0	0	0.335945	0.296841
C9JF50;E9PLU1;E9PRK5;E9PRW1;E9PSD6;Q9H019;Q9H019-2;Q9H019-3	0	0	0	0	0.524763	0	0	0	0	0.475237	0
C9JFE4;Q13098;Q13098-5;Q13098-7	0.393414	0	0	0	0	0	0.606586	0	0	0	0
C9JFR7;P99999	0	0	0	0.469175	0	0	0	0.530825	0	0	0
C9JFV4;Q8IZL8	0	1	0	0	0	0	0	0	0	0	0
C9JFX4;E9PLG6;E9PSD9;Q6IA17;Q6IA17-2	0	0	0	0	0	1	0	0	0	0	0
C9JG87;Q9NYK5;Q9NYK5-2	0	0	0	0	0	0	0	1	0	0	0
C9JH00;O75155;O75155-2	1	0	0	0	0	0	0	0	0	0	0
C9JHD7;C9JJK9;Q86YP4;Q86YP4-2;Q86YP4-3	0	1	0	0	0	0	0	0	0	0	0
C9JIF9;P13798	0.3439	0	0	0	0	0	0.6561	0	0	0	0
C9JIT1	0	0	0.230088	0	0	0.244533	0	0	0.231464	0.293915	0
C9JIZ6;P07602;P07602-2;P07602-3	0	0	0	0	1	0	0	0	0	0	0
C9JJ19;P82930	0	0	0	0	0	0	0	1	0	0	0
C9JJM2;Q96MV1;S4R434	0	0	0	0	0.689409	0	0	0	0.310591	0	0
C9JJN9;Q8N3P4;Q8N3P4-2;Q8N3P4-3	0.587401	0	0	0	0	0.412599	0	0	0	0	0
C9JJT5;G3V325;P56134-2;P56134-4	0	0	0	0	0	0	0	1	0	0	0
C9JJX6;E9PDC3;O00192;O00192-2	0	0	0	0	0	0	0	0.236365	0	0.28001	0.483626
C9JK83;O95630;O95630-2	0.427532	0	0	0	0	0	0.572468	0	0	0	0
C9JKL2;C9JPX5;O95772;O95772-2	0	0	0.218472	0	0	0	0	0	0.244437	0.293685	0.243405
C9JLB7;Q96HP4;U3KQU8	0	0	0	0	0	0	0	1	0	0	0
C9JLU1;P52434;P52434-4	0	0.312414	0	0	0	0	0.687586	0	0	0	0
C9JLW8;I3L2L5;I3L4Q0	0.66329	0	0	0	0	0.33671	0	0	0	0	0
C9JNE2;Q9Y530	0	1	0	0	0	0	0	0	0	0	0
C9JNW5;C9JXB8;P83731	0	0	0	0	0.628578	0	0	0.371422	0	0	0
C9JNZ0;C9JRY4;Q96IW7	0	0	0.204391	0	0	0	0	0	0.520167	0.275442	0
C9JP16;O75718	0	0	0	0	1	0	0	0	0	0	0
C9JP85;Q16656;Q16656-2;Q16656-4	0	1	0	0	0	0	0	0	0	0	0
C9JPG5;Q13275;Q13275-2	0	0	1	0	0	0	0	0	0	0	0
C9JQ41;H7C525;Q4VC31	0	0	0	0.590718	0	0	0	0.409282	0	0	0
C9JQ48;E2QRF5;Q9H8U3	0	0.472574	0	0	0	0	0	0.527426	0	0	0
C9JQ60
C9JQD4;O43447	0	1	0	0	0	0	0	0	0	0	0
C9JQI7;C9JQI7-2;D6RC30	0	0	0	0	0.379964	0	0	0	0	0.258118	0.361918
C9JQS9;E7ETT1;E7ETT4;E7EX59;E9PDR0;P05166;P05166-2	0	0	0	0	0	0	0	1	0	0	0
C9JQV0;H7C0T1;H7C2R9;Q9BRJ6	0	0	0	0	1	0	0	0	0	0	0
C9JR56	0	0	0	0	0	0	0	0.774738	0	0	0.225262
C9JRD2;P25686;P25686-2	0	0	0	0	0	0	1	0	0	0	0
C9JRZ6;Q9NX63	0	0	0	0	0	0	0	1	0	0	0
C9JS50;Q687X5
C9JSU1;Q9Y608;Q9Y608-2;Q9Y608-4;Q9Y608-5	0	1	0	0	0	0	0	0	0	0	0
C9JUQ8	0.521127	0	0.478873	0	0	0	0	0	0	0	0
C9JW74;C9JWU9;Q5EB52;Q5EB52-2;Q5EB52-3	0	0	0	0	0	0	0	1	0	0	0
C9JXM5;G5E9W1;Q7Z3E1	0	0	0	0	0.663819	0	0	0	0	0.336181	0
C9JY79;M0QZQ3;Q9H254;Q9H254-4	0	0.254805	0	0	0	0	0	0	0	0.266413	0.478782
C9JYJ6;Q4L180-3;Q4L180-5;Q4L180-7	0	0	0	0	0	0	0	1	0	0	0
C9JYM0;O75817	0	0	0	0	1	0	0	0	0	0	0
C9JYS5;J3KS67;J3QL47;J3QL63;K7ENL4;Q96ET8-3;Q9NYZ1	0	0	0	0	0	0	0	0	1	0	0
C9JZ38
C9JZB3;Q16821	0	0	0.248305	0	0	0	0	0.33273	0	0	0.418965
C9JZF7;G5E9W2;Q9P2E5;Q9P2E5-2	0	0	0	0	0	0	0	0	1	0	0
C9JZG9;C9JZY6;P62256	0	0	0	0	0	0	1	0	0	0	0
C9JZI1;P35249;P35249-2	0	0.721937	0	0	0	0	0	0	0	0	0.278063
C9JZI7	0	0	0	0	0	0	1	0	0	0	0
C9JZR2;O60716;O60716-10;O60716-11;O60716-13;O60716-2;O60716-3;O60716-5;O60716-9	0	0	0	0	0	0	0	0	0	0.422671	0.577329
C9K058;Q9H2H8	0	0	0	0	0	0	1	0	0	0	0
C9K0C8;Q9NS00;Q9NS00-2	0	0	0	0	0	0	0	0	1	0	0
C9K0I9	0	0.309424	0	0	0	0	0	0	0	0.244199	0.446377
D3DQV9;H0Y3P2;P78344;P78344-2	0.654412	0	0	0	0	0.345588	0	0	0	0	0
D3DUJ3;K7EIE9;K7EQG9;P17706;P17706-2;P17706-3;P17706-4	0	0	0	0	0	1	0	0	0	0	0
D3DWX8;P98173;P98173-2;P98173-3;Q5HY75	0	0	0	0	0.402623	0	0	0	0.597377	0	0
D3YTA9;F6U1T9;P63098	0	0	0	0	0	0	1	0	0	0	0
D3YTC7;Q9UBM1;Q9UBM1-2;Q9UBM1-3
D5H3J5;Q2L6G2	0	0.474451	0	0	0	0	0	0	0	0.19404	0.331509
D6R927;D6R946;D6R9K5;D6R9X3;D6RA45;D6RAT2;D6RB37;D6RBQ8;D6RCM1;D6REC2;D6REP3;D6RF98;D6RIV8;D6RIZ8;Q06330;Q06330-4;Q06330-5;Q06330-6;Q06330-7	0	1	0	0	0	0	0	0	0	0	0
D6R938;Q13557;Q13557-10;Q13557-11;Q13557-12;Q13557-3;Q13557-4;Q13557-5;Q13557-6;Q13557-8;Q13557-9	1	0	0	0	0	0	0	0	0	0	0
D6R9C3;H0UI06;P14406	0	0	0	0	0	0	0	1	0	0	0
D6R9C7	0	0	0	0	0	0	0	0	1	0	0
D6R9P3	0	1	0	0	0	0	0	0	0	0	0
D6R9P8;Q6AWC2;Q6AWC2-4;Q6AWC2-6	1	0	0	0	0	0	0	0	0	0	0
D6R9S2;D6RIC1;H0Y8L2;H0YEZ3;H0YJP6;P59282	0	0	0	0	0	0.303049	0.696951	0	0	0	0
D6R9S7;D6RDB0;D6RHE3;Q96GZ6;Q96GZ6-2;Q96GZ6-5;Q96GZ6-6;Q96GZ6-7;Q96GZ6-9	0	0.354094	0	0	0	0	0	0	0.645906	0	0
D6R9Z7;P15954	0	0	0	0	0	0	0	1	0	0	0
D6RA47;D6RE79;D6RIZ4;Q14728	0	0	0	0	1	0	0	0	0	0	0
D6RA57;D6RC31;D6RE67;H0Y9X1;Q96EY4	0	0.648864	0	0	0	0	0	0	0	0	0.351136
D6RA82;P12429	0	0	0	0	0	0	1	0	0	0	0
D6RA96;Q9NZ71;Q9NZ71-2;Q9NZ71-4;Q9NZ71-6;Q9NZ71-7;Q9NZ71-8;X6R5I7
D6RAC8;Q9NQ76;Q9NQ76-2;Q9NQ76-3	0	0.392834	0	0	0	0	0	0	0.607166	0	0
D6RAD4;P50613	0	1	0	0	0	0	0	0	0	0	0
D6RAD5	0	0	0	0	0	0	0	1	0	0	0
D6RAJ6;Q9UKT5;Q9UKT5-2	0	0	0	0	0	0	1	0	0	0	0
D6RAN1;D6RF83;D6RH06;H7BYK4;Q9NR12;Q9NR12-2;Q9NR12-3;Q9NR12-4;Q9NR12-5;Q9NR12-6	0	0.41095	0	0	0	0	0	0	0	0	0.58905
D6RAN8;H7C5U8;Q9P0M9	0	0	0	0	0	0	0	1	0	0	0
D6RAR4;Q04756
D6RAZ3;E7EMP6;Q96FZ2	0	0	1	0	0	0	0	0	0	0	0
D6RB81;Q9UHK6;Q9UHK6-5	0	0	0	1	0	0	0	0	0	0	0
D6RB89;P50120	0	0	0	0	0	0	1	0	0	0	0
D6RBM8	0	0	0.608093	0	0	0	0	0.391907	0	0	0
D6RBN6	0	0	0	0	0	0.440999	0	0	0	0.559001	0
D6RBR7;Q9Y3S2	0	0	0	0	0	0.478729	0	0	0.521271	0	0
D6RBW1;P06730;P06730-2;P06730-3
D6RBY0;D6RJG8;Q8TAC1;Q8TAC1-2	0	0	1	0	0	0	0	0	0	0	0
D6RCC4;D6RCC9;Q8NEC7	0	0	0	0	0	0	1	0	0	0	0
D6RCE7	0	1	0	0	0	0	0	0	0	0	0
D6RCM8;O95379;O95379-2;O95379-3;O95379-4	0	0	1	0	0	0	0	0	0	0	0
D6RCP5;Q8N264;Q8N264-2;Q8N264-3	0	0	0	0	0	0	0	1	0	0	0
D6RDG3	0	0	0.233205	0	0.47967	0	0	0	0.287124	0	0
D6RDG8;D6RGZ4;O43791	0	0.295809	0	0	0	0	0	0.353409	0	0	0.350782
D6RDK6	0	0	0	0	0	0	0	0	0	0.356767	0.643233
D6RE84
D6REA0;O75879	0	0	0	0	0	0	0	1	0	0	0
D6REK2;H0Y9T3;Q8WV44;Q8WV44-2;Q8WV44-4	0	1	0	0	0	0	0	0	0	0	0
D6RER5;D6RGI3;Q9NVA2
D6REX3	0.679793	0	0	0	0	0.320207	0	0	0	0	0
D6REY2;P23508;P23508-2	0	0	0	0	0	0	1	0	0	0	0
D6RF35;P02774;P02774-3	0	0	0.278442	0	0.721558	0	0	0	0	0	0
D6RF43	0	0	0.251022	0	0	0	0	0	0.474907	0.274072	0
D6RF48;Q9P2W9	0	0	0	0	1	0	0	0	0	0	0
D6RF86;P55285;P55285-2	0	0	0	0	0	0	0	0	0	1	0
D6RFG8;P27707
D6RFI1	0	1	0	0	0	0	0	0	0	0	0
D6RFI3;E7EQR8;Q9GZM5	0	0	0	0	0	0.328164	0	0	0.671836	0	0
D6RGG3;Q99715;Q99715-4	0	0.394474	0	0	0	0	0	0.320091	0	0.285435	0
D6RGK3;D6RHW1;D6RIE8;D6RIV9;D6RIY1;Q16594;Q9HBM6	0	1	0	0	0	0	0	0	0	0	0
D6RGK9;H0Y9C1;H0Y9Z5;Q96LI5	0	0	0	0	0	0	0	0	0	1	0
D6RGZ3;Q8N1W1;Q8N1W1-3;Q8N1W1-4;Q8N1W1-5;Q8N1W1-6	0	0.220138	0	0	0	0	0	0.442943	0	0.336919	0
D6RH21	0	0	0	0	0	0	0	0	1	0	0
D6RHG0;P78383	0	0	0	0	1	0	0	0	0	0	0
D6RHH9;Q8TCT1;Q8TCT1-2;Q8TCT1-3	0	0	0	0	0	0	1	0	0	0	0
D6RHX8;F8W9W2;P43250;P43250-2;P43250-3	0	0.540705	0	0	0	0	0	0	0	0	0.459295
D6RID8;Q13888;Q6P1K8	0	0.609692	0	0	0	0	0	0	0	0	0.390308
D6RIE3	0	0	0	0	0	0	0	1	0	0	0
D6RIG4;Q9HCL0;Q9HCL0-2	0	0	0	1	0	0	0	0	0	0	0
D6RIT3;Q8N1A6	0	0	0	0	0	0	1	0	0	0	0
D6RIY6;Q06265;Q06265-2	0	1	0	0	0	0	0	0	0	0	0
D6RJ90;Q9Y6G5	0	0	0	0	0	0.491558	0	0	0.508442	0	0
D6RJG9;Q9Y5W7;Q9Y5W7-2;Q9Y5W7-3;Q9Y5W7-4	0	0	0	0	0.601958	0	0	0	0	0	0.398042
E1CKY7;O60237;O60237-4;O60237-6	0	0	0	0	0	0	0	1	0	0	0
E2QRG8
E2QRK7;Q5JTD0;Q5JTD0-2	0	0	0	0	0	0.428179	0	0	0.571821	0	0
E3W980;E3W982;Q8TDG4	0	0	0	0	0	0	0	0	0	1	0
E5KLJ9;O60313-10;O60313-2;O60313-9	0	0	0	0.313573	0	0	0	0.686427	0	0	0
E5RFE0;E5RGT8;Q9UQ10	0	0	0	0	0	0	1	0	0	0	0
E5RFF8;J3KNU2;Q8IX29;Q8IX29-2	0	0	0	0	0	0	0	1	0	0	0
E5RFT4;Q8N4L2	0	0	1	0	0	0	0	0	0	0	0
E5RFV7;O00300	0	0	0	0	0	0	0	1	0	0	0
E5RFX7	0	0	0.447739	0	0	0	0	0	0	0	0.552261
E5RG15;E5RHB3;Q8NBP0;Q8NBP0-2	0	0.672065	0	0	0	0	0	0	0	0	0.327935
E5RG17;G5EA19;H0YBX2;Q6P1N9;U3KQS5	0	0	0	0	0	0	1	0	0	0	0
E5RG29	0	0	0	0	0.702447	0	0	0	0	0.297553	0
E5RG44;E5RGJ1;E5RIT1;Q629K1	0	0	0	0	1	0	0	0	0	0	0
E5RGB7;E5RGH1;H0YBV9;Q7Z388	0	0	0.60359	0	0	0	0	0	0	0.39641	0
E5RGU4
E5RGZ2;H0YKJ1;Q6NT76;Q6NT76-2;Q6NT76-3;Q6NT76-5	0	0	0	0	0	0	0	1	0	0	0
E5RHC5;Q8N6T3;Q8N6T3-3	0	0	0.419891	0	0	0	0.580109	0	0	0	0
E5RHG8;Q15369	0	0	0	0	0	0	1	0	0	0	0
E5RHW4;O94905	0	0	0.223454	0	0.776546	0	0	0	0	0	0
E5RIA2;E7EUF1;Q13822;Q13822-2;Q13822-3	0	0	0	0	0	0	0	0	0.470413	0.529587	0
E5RIA9;Q9UJ68;Q9UJ68-5	0	0	0	0	0	0	1	0	0	0	0
E5RIH5;Q6NXR4	1	0	0	0	0	0	0	0	0	0	0
E5RIK6	0	0	0.327751	0	0	0	0	0	0.672249	0	0
E5RIT6;Q9UNX3	0	0	0	0	0	0	0	1	0	0	0
E5RIW3;E5RJD8;O75347	0	0	0	0	0	0	1	0	0	0	0
E5RIW9;P28328	0	0	0	0	0	0	0	0	0	0.37114	0.62886
E5RJ29;Q9NYI0;Q9NYI0-2	0	0	0	0	0	0	0	0.259535	0	0.273188	0.467277
E5RJ36;H0YAX6;Q14CS0
E5RJF8;E5RK82;O15182	0	0.653245	0	0	0	0	0	0	0	0.346755	0
E5RJN7;E7EPX0;E7EVI1;E7EVJ4;Q9NUL3;Q9NUL3-2;Q9NUL3-3;Q9NUL3-6;Q9NUL3-7;Q9NUL3-8	0	0	0	0	0.711114	0	0	0	0	0.288886	0
E5RK69	0	0	0.277251	0	0	0	0.722749	0	0	0	0
E7EM64;Q7L5N1
E7EM72;E7EWQ4;O75912	1	0	0	0	0	0	0	0	0	0	0
E7EMB1;Q9UH65	0	0	0	0	0	0	1	0	0	0	0
E7EMC7;Q13501	0	0	0	0	0	0	0	0	0	0	1
E7EMD6;O43572	0	0	0	0	0	0	0	0	1	0	0
E7EMK3;J3QLD9;Q14254	0	0	0	0	0	0	0	0	0	0.428681	0.571319
E7EMS2;G3V3D1;G3V3E8;J3KMY5;P61916	0	0	0.278011	0	0	0	0	0	0	0.395069	0.32692
E7EMT5;P04798	0	0	0	0	0.712167	0	0	0	0.287833	0	0
E7EMT6;E7ENY2;E7EQA9;E7EV32;E7EVA2;E7EW82;H7C3L4;Q92844	1	0	0	0	0	0	0	0	0	0	0
E7EMZ9;E9PBC6;O95359;O95359-3
E7EN01;Q16602	0	0	0	0	0	0	0	0	1	0	0
E7EN24;Q12864	0	0	0	0	0	0	0	0	0.451522	0.273955	0.274523
E7EN73;Q8IZA0;Q8IZA0-2	0	0	0	0	0.623194	0	0	0	0.376806	0	0
E7EN91;Q9BWF2	0.355847	0	0	0	0	0	0.644153	0	0	0	0
E7END6;P04070;P04070-2	0	0	0	0	1	0	0	0	0	0	0
E7ENL6;P12111;P12111-2;P12111-4	0	1	0	0	0	0	0	0	0	0	0
E7ENT5;E7EV45;Q9ULF5	0	0	0.30263	0	0	0	0	0	0	0.375335	0.322035
E7ENV7	0	0	0	0	0	0	0	0	0	1	0
E7ENY0;E7EV99;P35611;P35611-2;P35611-3;P35611-6	0	1	0	0	0	0	0	0	0	0	0
E7EP17;Q9NYC9;Q9NYC9-2
E7EP72;Q9UFG5	0	0	0	0	0.645273	0	0	0	0.354727	0	0
E7EPB3;P50914	0	0	0	0	0.542004	0	0	0.457996	0	0	0
E7EPG1;Q13201	0	0.710448	0	0	0	0	0	0	0	0	0.289552
E7EPI0;Q9P2D0	0	0	0	0	0.542293	0	0	0	0	0.233493	0.224214
E7EPK1;E7ES33;Q16181;Q16181-2	0	1	0	0	0	0	0	0	0	0	0
E7EPN9;Q9Y520;Q9Y520-4;Q9Y520-5;Q9Y520-6;Q9Y520-7
E7EPS8;P28827;P28827-2	0	1	0	0	0	0	0	0	0	0	0
E7EPT4;P19404	0	0	0	0	0	0	0	1	0	0	0
E7EQB2;E7ER44;P02788;P02788-2	0	0	0	0.50165	0	0	0	0	0	0.253053	0.245297
E7EQH1;E9PMB7;E9PR55;Q8NFJ9;Q8NFJ9-2;Q8NFJ9-3	0	0.351386	0	0	0	0	0	0.648614	0	0	0
E7EQM8;J3QRM6;J3QS93;P43146	0	0	0	0	0	0	0	0	1	0	0
E7EQQ5;Q9C035;Q9C035-2;Q9C035-3;Q9C035-4;Q9C035-5;Q9C035-6	0.53296	0	0	0	0	0	0.46704	0	0	0	0
E7EQT3;Q9BY07-5	0	0	0	0	0	0	1	0	0	0	0
E7EQT4;Q9UKV3;S4R3H4	0	1	0	0	0	0	0	0	0	0	0
E7EQU1;E7ES08;E9PES6;O15347	0	1	0	0	0	0	0	0	0	0	0
E7EQY1;Q96C01	0	0	0	0.531748	0	0	0	0.468252	0	0	0
E7ER45;O43451	0	0	0	0	0	0	0	0	0	0.50193	0.49807
E7ER77;Q7Z2K6	0	0	0	0	1	0	0	0	0	0	0
E7ERI8;E7EW49;O75122-3
E7ERS3;Q86VM9	0	0.667471	0	0	0	0	0	0	0	0	0.332529
E7ES84;P50748	0	0	0.599381	0	0	0	0	0	0	0.400619	0
E7ES96;P49768;P49768-2	0	0	1	0	0	0	0	0	0	0	0
E7ESA6;H0YBP1;Q05397;Q05397-7
E7ESA7;P29474	0	0	0.420494	0	0	0	0	0	0	0	0.579506
E7ESC6;Q9UIA9	0	0	0	0	0	0	1	0	0	0	0
E7ESD2;Q641Q2;Q641Q2-2	0	0	0	0	0	0.5142	0	0	0.4858	0	0
E7ESF6;Q13094	0	0.556829	0	0	0	0	0	0.443171	0	0	0
E7ESK6;E9PBI9;P34741	0	0	0	0	0.610752	0	0	0	0	0	0.389248
E7ESL0;J3KQY1;Q9NWU5;Q9NWU5-2;Q9NWU5-3	0	0	0	0	0	0	0	1	0	0	0
E7ESP4;P17301	0	0.288104	0	0	0	0	0	0.337588	0.374308	0	0
E7ESS3;K7EKW3;Q71RG4;Q71RG4-2	0	0	0	0	0.679407	0	0	0	0.320593	0	0
E7ESU7	0	0	1	0	0	0	0	0	0	0	0
E7ESY4;H0Y4T7;Q13330;Q13330-3	0	0.714272	0	0	0	0	0	0	0	0	0.285728
E7ET49;Q8NCG7;Q8NCG7-2;Q8NCG7-4	0	0	0	0	0	1	0	0	0	0	0
E7ET87;E7EVI4;O75410;O75410-10;O75410-2;O75410-3;O75410-4;O75410-5;O75410-6;O75410-7;O75410-9
E7ETB3	1	0	0	0	0	0	0	0	0	0	0
E7ETH0;G3XAM2;P05156	0	0	0.232582	0	0.767418	0	0	0	0	0	0
E7ETM6;Q8N2H4	0	0	0	0	0	0	0	0	1	0	0
E7ETU5;F6Y5H0;P29558;P29558-2	0	0	0.401381	0	0	0	0	0	0	0.598619	0
E7ETU7;H0Y9G6;P09001	0	0	0	0	0	0	0	1	0	0	0
E7ETY4;E9PC69;Q7KZI7;Q7KZI7-10;Q7KZI7-11;Q7KZI7-12;Q7KZI7-13;Q7KZI7-14;Q7KZI7-15;Q7KZI7-16;Q7KZI7-2;Q7KZI7-3;Q7KZI7-4;Q7KZI7-5;Q7KZI7-6;Q7KZI7-7;Q7KZI7-8;Q7KZI7-9
E7ETZ4;Q9Y6E2	0	0	0	0	0	1	0	0	0	0	0
E7EU05;E9PLT1;P16671;P16671-3	0	0	0	0	0.370786	0	0	0	0	0.29057	0.338643
E7EU13;Q96P48;Q96P48-1;Q96P48-2;Q96P48-3;Q96P48-4	0	0	0	0	0	0	1	0	0	0	0
E7EU14	0	0	0	0	0	0	1	0	0	0	0
E7EUH7;Q96PZ0;Q96PZ0-2	0	0	0	0	0	0	1	0	0	0	0
E7EUJ7;Q8TC20;Q8TC20-2;Q8TC20-3;Q8TC20-5	0	1	0	0	0	0	0	0	0	0	0
E7EUU4;Q04637-8	0	0	0	0	0	1	0	0	0	0	0
E7EUW0;H0YA74;Q9C0I3;Q9C0I3-2	0	0	0.497841	0	0	0	0	0	0.502159	0	0
E7EV01;O15484	0	0	0	0	0	0	0	0	0	0.466993	0.533007
E7EV71;Q14766;Q14766-2;Q14766-4;Q14766-5	0	0.738606	0	0	0	0	0	0	0	0	0.261394
E7EVA0	0	0	0	0	0	0	1	0	0	0	0
E7EVC7;Q676U5;Q676U5-2	0	0	0	0	0	0	1	0	0	0	0
E7EVE9;P18074	0	1	0	0	0	0	0	0	0	0	0
E7EVH7;F8W6L3;G3V2E7;G3V3H3;G3V5R9;Q07866;Q07866-10;Q07866-2;Q07866-3;Q07866-4;Q07866-5;Q07866-6;Q07866-7;Q07866-8;Q07866-9	0	0	0	0	0	0	1	0	0	0	0
E7EVJ5;Q96F07;Q96F07-2	0	0	0	0	0	0.347829	0	0	0.652171	0	0
E7EVM0;H0YBR7;H0YBY1;P01266;P01266-2	0	0.59828	0	0	0	0	0	0	0	0	0.40172
E7EVQ6;Q14534	0	0	0	0	1	0	0	0	0	0	0
E7EVX8;Q8WWY3	0	1	0	0	0	0	0	0	0	0	0
E7EVZ1;Q86UP3;Q86UP3-2;Q86UP3-4;Q86UP3-5	0	0.566425	0	0	0	0	0	0	0	0	0.433575
E7EW05;Q9NVU7;Q9NVU7-2	0	0.648613	0	0	0	0	0	0	0	0	0.351387
E7EWD3;O75077;O75077-2	0	0	0	0	0.622915	0	0	0	0	0	0.377085
E7EWM1;Q15596	0	0	0.458924	0	0	0	0	0	0.541076	0	0
E7EWP0;H0Y886;O43674;O43674-2	0	0	0	0.415287	0	0	0	0.584713	0	0	0
E7EWR4;P33240;P33240-2	0	1	0	0	0	0	0	0	0	0	0
E7EWW0;Q7Z3J2	0	0	0	0	0	1	0	0	0	0	0
E7EWX8	0	0	0.309157	0	0	0	0	0	0	0.337053	0.35379
E7EX17;P23588	0.643433	0	0	0	0	0.356567	0	0	0	0	0
E7EX40;Q6WKZ4;Q6WKZ4-2;Q6WKZ4-3	0	0	0	0	0	0	1	0	0	0	0
E7EX44;Q05682-2;Q05682-3;Q05682-6	0	0.484531	0	0.515469	0	0	0	0	0	0	0
E7EX70;Q9GZS1	0	1	0	0	0	0	0	0	0	0	0
E7EX90;Q14203;Q14203-3;Q14203-4;Q14203-6	0.703412	0	0	0	0	0.296588	0	0	0	0	0
E9PAM5	0.574669	0.425331	0	0	0	0	0	0	0	0	0
E9PAV3;E9PAV3-2;F8VZJ2;F8W0W4;H0YHX9;Q13765	0	0	0	0	0	1	0	0	0	0	0
E9PB18;Q6UXG2;Q6UXG2-2;Q6UXG2-3;Q6UXG2-4
E9PB51;Q9BWF3	0	1	0	0	0	0	0	0	0	0	0
E9PB61;Q86V81	0	1	0	0	0	0	0	0	0	0	0
E9PB90;P52789	0	0	1	0	0	0	0	0	0	0	0
E9PBC1;F6PQP6;I3L2B2;I3L2H1;I3L356;O95208;O95208-2;O95208-3;O95208-5	0	0	0	0	0	0	0	0	0	0	1
E9PBF9;H7C2N6;P15336	0	0	0	0	0	0	0.588124	0	0.411876	0	0
E9PBP6	0	0	0	0	0	0	0	0	0	0	1
E9PBZ2;P15428;P15428-2;P15428-4	0	0	0	0	0	0	1	0	0	0	0
E9PC53;H7C3N0;Q8TBK2;Q8TBK2-2	0	0	0	0	0	0	1	0	0	0	0
E9PC61;G4U4J3;Q8NDF8;Q8NDF8-2;Q8NDF8-3;Q8NDF8-5	0	1	0	0	0	0	0	0	0	0	0
E9PC66;P17029	0	1	0	0	0	0	0	0	0	0	0
E9PC87;O94876;O94876-2	0	0	0	0	1	0	0	0	0	0	0
E9PC90;H0YA62;P14635;P14635-2	0	0	0	0	0	0	0	0	0	0.494612	0.505388
E9PCD7;H0YA68;Q9Y2E5;Q9Y2E5-2
E9PCJ7;G3V336;Q8N806	0	0	1	0	0	0	0	0	0	0	0
E9PCN2;Q02153;Q02153-2	0	0	0	0	0	0	1	0	0	0	0
E9PCP0;F5H0S8;F5H100;F5H8J8;P16520;P16520-2	0	0	1	0	0	0	0	0	0	0	0
E9PCQ7;F8WD67;F8WD87;O43709;O43709-2;O43709-3	0	0	0	0	0	0	0	0	1	0	0
E9PCW1;G5E9T8;K7EJC8;O95249	0	0	0	0	0	0.420995	0	0	0.579005	0	0
E9PCX2;P15121	0	0	0	0	0	0	1	0	0	0	0
E9PCX5	0	0	0	0	0	0	0	0.519528	0.480472	0	0
E9PD50;Q92540;Q92540-2;Q92540-4	1	0	0	0	0	0	0	0	0	0	0
E9PD53;Q9NTJ3;Q9NTJ3-2	0	0	0	0.400548	0	0	0	0.599452	0	0	0
E9PD68;Q14194;Q14194-2	1	0	0	0	0	0	0	0	0	0	0
E9PD72	0	0	0.463115	0	0	0	0	0	0.536885	0	0
E9PDE8	0	0	0	0	0	0.363582	0	0	0.636418	0	0
E9PDN4
E9PEF1;O00408;O00408-3;O00408-4	0	0	0	0	0	0	1	0	0	0	0
E9PEJ6;H0Y547;P98196	0	0	0	0	0.386599	0	0	0	0	0.220125	0.393275
E9PEP6;O14786	0	0	0	0	0.607436	0	0	0	0	0	0.392564
E9PEQ6	0	0.254627	0	0	0	0.297671	0	0	0.447702	0	0
E9PER6;O15530;O15530-2;O15530-3	0	0	0	0	0	0	1	0	0	0	0
E9PEW8	0	0.589327	0.410673	0	0	0	0	0	0	0	0
E9PEX6;P09622	0	0	0	0.318051	0	0	0	0.681949	0	0	0
E9PF10;O75694	0	1	0	0	0	0	0	0	0	0	0
E9PF16;Q96CM8;Q96CM8-2;Q96CM8-3	0	0	0	0	0	0	0	1	0	0	0
E9PF19;Q96E41;Q9Y4P3	0	0	0	0	0	0	0	1	0	0	0
E9PFF8	0	0	0.215959	0	0.489338	0	0	0	0	0	0.294702
E9PFK5;P78316;P78316-2	0	1	0	0	0	0	0	0	0	0	0
E9PFK9;Q9UJ41;Q9UJ41-3;Q9UJ41-4	0	0.336706	0	0	0	0	0.663294	0	0	0	0
E9PFR3;Q14738;Q14738-2;Q14738-3	0	0	0	0	0	0	1	0	0	0	0
E9PFR9;J3KQJ8;Q96N96;Q96N96-2;Q96N96-3;Q96N96-5;Q96N96-6	0	0	0	0	0	0	0	1	0	0	0
E9PG19;O94868;O94868-2	1	0	0	0	0	0	0	0	0	0	0
E9PG32;Q6ZR08	0	0	1	0	0	0	0	0	0	0	0
E9PG40;P05067;P05067-11;P05067-7;P05067-8;P05067-9	0	0	0.310252	0	0.689748	0	0	0	0	0	0
E9PG71;P54764;P54764-2	0	0	0	0.381505	0	0	0	0	0	0.283604	0.334891
E9PG73;Q13427	0	1	0	0	0	0	0	0	0	0	0
E9PGC0;P20936;P20936-2;P20936-4	0	0	0	0	0	0	1	0	0	0	0
E9PGM7;O94988;O94988-1;O94988-3;O94988-5;O94988-6	0	0	0	0	0	1	0	0	0	0	0
E9PGQ0;Q96H78	0	0	0	0	0	0	0	1	0	0	0
E9PGT3;Q15418;Q15418-2;Q15418-4	0	0	0	0	0	0	1	0	0	0	0
E9PGT6;Q99627	0.528102	0	0	0	0	0	0.471898	0	0	0	0
E9PHI4;O94901-9	0	0.451994	0	0	0	0	0	0.289314	0	0	0.258692
E9PHR9;Q9NRQ2;Q9NRQ2-2	0	0.503068	0	0	0	0	0	0	0	0	0.496932
E9PHT3;Q8IYS0;Q8IYS0-2
E9PHV5;P28290	0	0.273299	0	0.443124	0	0	0	0	0	0	0.283577
E9PHX8;H7C3L9;Q12866	0	0	0	0	0	0	0	0	0	0.449007	0.550993
E9PHY5;O43491-4	0	0	0	1	0	0	0	0	0	0	0
E9PHY8;Q8NDA8	0	0	0	0	0	0.448099	0	0	0.551901	0	0
E9PI41	0	1	0	0	0	0	0	0	0	0	0
E9PI92	0	0	0	0	0	0	0	0	1	0	0
E9PIC5;Q8N4M1-4;Q8N4M1-5;Q8N4M1-6	0	0	0	1	0	0	0	0	0	0	0
E9PIE3;Q969G5	0	0	0.267537	0	0	0	0	0	0	0.347738	0.384725
E9PIF4;Q99519	0	0	0	1	0	0	0	0	0	0	0
E9PIG5;O00212
E9PIH9;F8WA39;H0YDX3;Q13613;Q13613-2;Q8NEC6	0	0	1	0	0	0	0	0	0	0	0
E9PIZ1	0	0	0	0	0	1	0	0	0	0	0
E9PIZ2;H0YDB8;Q8N3Y3	0	0	1	0	0	0	0	0	0	0	0
E9PJ55;Q9NUJ3	0	0	0	0	0	0	1	0	0	0	0
E9PJE4;Q9GZQ3	0	0	0	0	0	0.283604	0	0	0.716396	0	0
E9PJI1;Q92993;Q92993-2;Q92993-3;Q92993-4	0	1	0	0	0	0	0	0	0	0	0
E9PJJ5;E9PK99;E9PMS5;E9PRT1;Q4G0X4	0.473283	0	0	0	0	0	0.526717	0	0	0	0
E9PJN9	0	0	0	0	0.648746	0	0	0.351254	0	0	0
E9PJQ3;Q8N413;Q8N413-4	0	0	0	0	0	0	0	1	0	0	0
E9PJW8;E9PQA6;Q96EY5;Q96EY5-2;Q96EY5-3	0	0	0	0	0	0.488003	0	0	0.511997	0	0
E9PK25;G3V1A4;P23528	0	0	0	0	0	0	1	0	0	0	0
E9PK67;E9PNI7;Q53GL7	0	0	0	0	0	0	1	0	0	0	0
E9PK91;Q9NYF8;Q9NYF8-2;Q9NYF8-3	0	1	0	0	0	0	0	0	0	0	0
E9PKA8;E9PQL5;E9PSC8;Q6ZUT1;Q6ZUT1-2;Q6ZUT1-3	0	0	0	0	0	0	0	0	0.578583	0.421417	0
E9PKC0;Q6IQ23;Q6IQ23-2	0	0	0	0	0	0	0	0.272862	0	0.31938	0.407759
E9PKE9;G3V148;Q9H920;Q9H920-2
E9PKF6;H7BXH2;Q5H9R7;Q5H9R7-2;Q5H9R7-5;Q5H9R7-6	0	0	0	0	0	0	1	0	0	0	0
E9PKG1;Q99873;Q99873-2;Q99873-3	0.405566	0	0	0	0	0	0.594434	0	0	0	0
E9PKN0;E9PQ01;O94913	0	0	0	0	0	0.449319	0	0	0.550681	0	0
E9PKP7;P17480-2	0	1	0	0	0	0	0	0	0	0	0
E9PKP8;E9PS00;H0YCN1;H0YED5;Q9Y5Q0	0	0	0	0	0	0	0	0	1	0	0
E9PKS9;E9PQE8;Q9Y296;Q9Y296-2
E9PKT4;Q8N131;Q8N131-2	0	0	0	0	0	0.472905	0	0	0.527095	0	0
E9PKT9;O96033	0	0	0	0	0	0	1	0	0	0	0
E9PL17;Q92989;Q92989-2	1	0	0	0	0	0	0	0	0	0	0
E9PL57	0	0	0	0	0	0	1	0	0	0	0
E9PLD0;Q9H0U4
E9PLI6;E9PNH5;E9PS76;Q8N9N8
E9PLK3;P55786	0	0	0	0	0	0	1	0	0	0	0
E9PLN8;F8W9H0;I3L3B4;Q9BQB6;Q9BQB6-2;Q9BQB6-3	0	0	0	0	0	0	0	0	0.64503	0.35497	0
E9PLP8;Q12996	0	1	0	0	0	0	0	0	0	0	0
E9PLY5	0.354903	0	0	0	0	0	0.645097	0	0	0	0
E9PM19;P29597	0	0	0	0	0	0	0	0	0	0.419862	0.580138
E9PM62;Q5T9L3;Q5T9L3-2	0	0	0	0	0.69892	0	0	0	0	0	0.30108
E9PM75;Q9NTG7	0	0	0	0	0	0	0	1	0	0	0
E9PM90;Q9UK41;Q9UK41-2	0	0	0	0	0	0	1	0	0	0	0
E9PMB9;Q16798	0	0.415154	0	0	0	0	0	0	0.355908	0	0.228938
E9PMG5	0	0	0	0	0	0	0	0.289386	0	0	0.710614
E9PMI6;J3KN38;P54105	0.425557	0	0	0	0	0	0.574443	0	0	0	0
E9PMJ1;E9PS06;Q15771	0	0	0.508252	0	0	0	0	0	0.491748	0	0
E9PMJ5	0	0	0	0	0	0	0	1	0	0	0
E9PMQ6;Q00613;Q00613-2	1	0	0	0	0	0	0	0	0	0	0
E9PMR4;K4DIA7;P48509	0	0	0	0	0	0	0	0	0	0.417452	0.582548
E9PMS6	0	0.423555	0	0	0	0	0	0.576445	0	0	0
E9PN76;Q8ND24;Q8ND24-2	0	0	1	0	0	0	0	0	0	0	0
E9PN78;Q4KMG0;Q4KMG0-2
E9PN89
E9PNE5;Q9H1C4	0	0	1	0	0	0	0	0	0	0	0
E9PNL8;Q13574;Q13574-1;Q13574-3;Q13574-4;Q13574-5;Q13574-6;Q13574-7
E9PNP3;E9PR47;Q9H7C9	0	0	0	0	0	0	1	0	0	0	0
E9PPF6	0	0	0.281914	0	0	0	0	0	0	0.358012	0.360075
E9PPQ1;J3KNE7;Q16890;Q16890-5	0	0	0.287873	0	0	0	0.712127	0	0	0	0
E9PPZ9;O43292;O43292-2	0	0	0	0	1	0	0	0	0	0	0
E9PQ59;Q6P4R8;Q6P4R8-2;Q6P4R8-3	0	1	0	0	0	0	0	0	0	0	0
E9PQ73;Q8TDW7;Q8TDW7-1	0.453584	0	0	0	0	0	0.546416	0	0	0	0
E9PQC9	0	0	0	0	0	0	0	0	1	0	0
E9PQD7;P15880	0	0	0	0	0	0	0	1	0	0	0
E9PQM8;E9PRF4;Q15047;Q15047-3	0	0	0	0	0	0	1	0	0	0	0
E9PQY2;Q9NQP4	0	0	0	0	0	0	1	0	0	0	0
E9PQZ2;Q11206;Q11206-2;Q11206-3;Q11206-4;Q11206-5;Q11206-6;Q11206-7	0	0	0	0	0	0	0	0	1	0	0
E9PR30;P62861	0	0	0	0	0.507496	0	0	0.492504	0	0	0
E9PR76;E9PSH4;Q9H063	1	0	0	0	0	0	0	0	0	0	0
E9PR92	0	0	0	0	0	0	0	0	0.613699	0	0.386301
E9PRP3	0	0	0	0	0	0	0	1	0	0	0
E9PRQ7;Q04323	0.326366	0	0	0	0	0	0.673634	0	0	0	0
E9PRU1;O95967	0	0	0	0	0	0	1	0	0	0	0
E9PS41;Q6RFH5;Q6RFH5-2	0	1	0	0	0	0	0	0	0	0	0
E9PS44;Q01628	0	0	0	0	0	1	0	0	0	0	0
E9PSA5;Q96Q83
E9PSI1	0	0	0	0	0	0	1	0	0	0	0
ENSEMBL:ENSBTAP00000001528	0	0	0	0	0	0	0	0	0	1	0
ENSEMBL:ENSBTAP00000007350	0	0	0.34835	0	0.65165	0	0	0	0	0	0
ENSEMBL:ENSBTAP00000024146	0	0	0	0	1	0	0	0	0	0	0
ENSEMBL:ENSBTAP00000024462;ENSEMBL:ENSBTAP00000024466	0	0	0	0.380798	0	0	0	0.21081	0	0.197696	0.210696
ENSEMBL:ENSBTAP00000038329;REFSEQ:XP_001252647	0	0	0	0	0	0	0	0	0.539365	0.460635	0
F2Z2H4;J3KPC0;Q5VVY4;Q86XD8	0	0	0	0	0	0	0	0	1	0	0
F2Z2J1;Q15349;Q15349-2;Q15349-3	0.413392	0	0	0	0	0	0.586608	0	0	0	0
F2Z2U4;H0Y4W2;Q9Y4A5;Q9Y4A5-2	0	0.779297	0.220703	0	0	0	0	0	0	0	0
F2Z2W7;Q8IZ69;Q8IZ69-2	1	0	0	0	0	0	0	0	0	0	0
F2Z2X4;Q9C0E2	0.425638	0	0	0	0	0	0.574362	0	0	0	0
F2Z2X9	0	0	0	0	0.627109	0	0	0	0.372891	0	0
F2Z357;J3KPC5;P47736;P47736-4	0	0	0	0	0	0	1	0	0	0	0
F2Z3K0	1	0	0	0	0	0	0	0	0	0	0
F5GWB9;I3L1L5;I3L2B9;I3L4D7;I3L4R7;I3L517;Q8NHS9;Q8NHS9-2;Q8NHS9-3	0	0.550863	0	0	0	0	0	0.449137	0	0	0
F5GWI0;F5H2L3	0.472227	0	0	0	0	0	0.527773	0	0	0	0
F5GWI4;P00813	0	0	0	0	0	0	1	0	0	0	0
F5GWR7;P23468;P23468-2;P23468-3;P23468-4;P23468-5;P23468-6;P23468-7;Q3KPI9	0	0	0	0	0	0	0	0	0	0.282726	0.717274
F5GX19;F5H3Y3;Q6IAA8	0	0	0	0	1	0	0	0	0	0	0
F5GX23;F5H5V4;J3KN29;O00233;O00233-2	0.385444	0	0	0	0	0	0.614556	0	0	0	0
F5GX26;Q7Z3Z4;Q7Z3Z4-2;Q7Z3Z4-3	0	0	0	0	0	1	0	0	0	0	0
F5GXC5;H3BUJ1;Q8TB96	0	0	0	0	0	0.348274	0	0	0.651726	0	0
F5GXJ1;F5H5N1;O75251;O75251-2	0	0	0	0	0	0	0	1	0	0	0
F5GXW5;Q99622	0	0.29985	0	0	0	0	0.70015	0	0	0	0
F5GXX5;P61803	0	0	0	0	0	0	0	1	0	0	0
F5GXX6;F5H271;Q9NQ89	0	0	0	0	0	0	0	0	1	0	0
F5GY03;P09486	0	0	0	0	0.561409	0	0	0	0	0	0.438591
F5GY80;F5H7G1;P07358	0	0	0	0	1	0	0	0	0	0	0
F5GYJ5;Q9NX18	0	0	0	0	0	0	0	0.724619	0	0.275381	0
F5GYK2;Q9NRL3;Q9NRL3-3
F5GYQ1;P61421	0	0	0	0	1	0	0	0	0	0	0
F5GYQ6;H7C1B8;H7C499;Q96HL8;Q96HL8-2;Q96HL8-3;Q96HL8-4;S4R3I7	0	0.428106	0	0	0	0	0	0	0	0.571894	0
F5GYQ7	0	0	0	0	0	0	1	0	0	0	0
F5GZ54	0	0	0	0	0	0	0	1	0	0	0
F5GZ97;Q9Y3C0	0	0	0	0	0	0	0	0	1	0	0
F5GZG1	0	0	0.304262	0	0	0	0	0	0	0.352215	0.343523
F5GZQ1	0	0	0	0	0	0	0	0	1	0	0
F5GZY7;Q9H0R8;Q9H0R8-2
F5H001;F5H7N8	0	0	0.313906	0	0	0.324436	0	0	0.361657	0	0
F5H039;Q9NQX3;Q9NQX3-2	0.404796	0	0	0	0	0	0.595204	0	0	0	0
F5H0C4;Q9BRP4;Q9BRP4-2	1	0	0	0	0	0	0	0	0	0	0
F5H0F9;Q9UJX4;Q9UJX4-3	0.563606	0.436394	0	0	0	0	0	0	0	0	0
F5H0R1;H3BRB1;Q9H6E5	0	0	0	0	0	0	1	0	0	0	0
F5H0U5;Q9NZD2	0	0	0	0	0	0	1	0	0	0	0
F5H101;F8WE42;Q76FK4;Q76FK4-4	0	1	0	0	0	0	0	0	0	0	0
F5H116	0	0.316653	0	0.337226	0	0	0	0.346121	0	0	0
F5H157;Q15286	0	0	1	0	0	0	0	0	0	0	0
F5H199;F5H7C4;Q8IXL7-2	0	0	0	0	0	0	1	0	0	0	0
F5H1R2;Q8IY45;Q8IY45-2
F5H1R4;K7EM85;K7ES92;K7ES98;Q92619;Q92619-2	0	0	0	0	0	0	0	0	0	1	0
F5H1S1;Q92521	0	0.441901	0	0	0	0	0	0	0.558099	0	0
F5H1U9;O75970;O75970-3	0	0	0	0	0	0	1	0	0	0	0
F5H1Z6;Q9Y365	0	0	0	0	0	0	1	0	0	0	0
F5H265	0	0	0	0	0	0	0	0	0	0.479028	0.520972
F5H269;Q9Y485
F5H2B9;H0YNH8;Q9BZF9;Q9BZF9-2
F5H365;Q15436	0	0	0	0	0	0.544445	0	0	0.455555	0	0
F5H369;O75747	0	1	0	0	0	0	0	0	0	0	0
F5H3G9;F5H4N6;Q9Y3R0;Q9Y3R0-2;Q9Y3R0-3	1	0	0	0	0	0	0	0	0	0	0
F5H3Y4;Q8IY37	0	1	0	0	0	0	0	0	0	0	0
F5H442;Q99816	0	0	0	0	0	0	1	0	0	0	0
F5H459;Q92572
F5H4F1;Q99638	1	0	0	0	0	0	0	0	0	0	0
F5H4R1;F5H538;J3KNB8;Q9Y6R4;Q9Y6R4-2	0	0	0	0	0	0	1	0	0	0	0
F5H4X9	0	0	1	0	0	0	0	0	0	0	0
F5H523;Q9P2K6	1	0	0	0	0	0	0	0	0	0	0
F5H5A3;Q8IVH8;Q8IVH8-2;Q8IVH8-3	0	1	0	0	0	0	0	0	0	0	0
F5H5I6;H0Y8R1;H0YAK1;Q12849	0	0	0	0	0	0	0	1	0	0	0
F5H5P2;P12694	0	0	0	0	0	0	0	1	0	0	0
F5H5R8;P18440	0	0	0	0	0	0	1	0	0	0	0
F5H5T5;Q7Z3V4
F5H619;Q86XA9;Q86XA9-2	1	0	0	0	0	0	0	0	0	0	0
F5H658;Q14562	0	0.328668	0	0	0	0	0	0	0.239624	0.221609	0.210099
F5H6Q1;J3KR44;Q96FW1	0	0	0	0	0	0	1	0	0	0	0
F5H6U7;G3V1U5;Q9Y3E0	0	0	0	0	0.565777	0	0	0	0.434223	0	0
F5H6Z0;Q00537;Q00537-2	0	0	0	0	0	0	1	0	0	0	0
F5H702;Q96GC5;Q96GC5-3	0	0	0	0	0	0	0	1	0	0	0
F5H760	0	0.367904	0	0	0	0.333799	0	0	0	0.298297	0
F5H785;P0DI81;P0DI81-3;P0DI82
F5H7I0;Q8NC69	1	0	0	0	0	0	0	0	0	0	0
F5H7I4;H9ZYI9;Q06547;Q06547-2;Q06547-3;Q06547-4	0	1	0	0	0	0	0	0	0	0	0
F5H7J9;H0YGW5;O75581	0	0	0.27145	0	0	0	0	0	0	0.311392	0.417159
F5H7P7;Q96BP3	0	1	0	0	0	0	0	0	0	0	0
F5H7S3	0	0.394435	0	0.605565	0	0	0	0	0	0	0
F5H7V9;J3QSU6;P24821;P24821-2;P24821-3;P24821-4	0	1	0	0	0	0	0	0	0	0	0
F5H8F7;Q9UBL3;Q9UBL3-3	0	1	0	0	0	0	0	0	0	0	0
F5H8H2;Q03426	0	0	0	0	0	0	1	0	0	0	0
F6M2K2;F6M2K4;Q14686	0	1	0	0	0	0	0	0	0	0	0
F6QDS0;I3L0H8;Q9NUU7	0	0	0	0	0	0	1	0	0	0	0
F6QTA4;Q5JQZ9;Q9BWU1;Q9BWU1-2	0	1	0	0	0	0	0	0	0	0	0
F6RY50;Q96FS4	0	0	0	0.512952	0	0	0	0.487048	0	0	0
F6SDV2;Q9GZM7;Q9GZM7-3	0	0	0.36651	0	0	0	0	0	0	0	0.63349
F6SFZ6;Q99571;Q99571-2;Q99571-3	0	0	0	0	0	0	0	0	0	0	1
F6TB26;Q5SZR4;Q9Y2W6	0	0	0	0	0	0	0	1	0	0	0
F6UJY1;J9JIE9;Q5T013	0	0	0	0	0	0	1	0	0	0	0
F6VRR5;Q9BY77	0	1	0	0	0	0	0	0	0	0	0
F6VZ39;H0YA61;Q9BX46;Q9H0Z9;Q9H0Z9-2	0	0.518058	0	0	0	0	0	0	0.481942	0	0
F6XA08;Q5VYX0;Q5VYX0-2	0	0	0	0	0	0	0	0	0	0.483619	0.516381
F6XHT0;Q9Y6D0	0	0	0	0	1	0	0	0	0	0	0
F6XZD3;Q8N283	0	0	0	1	0	0	0	0	0	0	0
F8VP71;Q6P1Q0;Q6P1Q0-2;Q6P1Q0-4;Q6P1Q0-7	0	0	0	0	0	0	0	1	0	0	0
F8VPD4	1	0	0	0	0	0	0	0	0	0	0
F8VPN1;F8VQE3;F8VRQ9;F8VUB3;F8VWP8;F8VXS2;F8VZI3;F8W0X2;Q9P1Z2;Q9P1Z2-2;Q9P1Z2-3	1	0	0	0	0	0	0	0	0	0	0
F8VQD9;F8VVA0;Q9BSB4	0	0	0	0	0	0	1	0	0	0	0
F8VQR7;F8VW96;Q16527	0	0	1	0	0	0	0	0	0	0	0
F8VRE8;Q96HH6;Q96HH6-2	0	0	0	0	1	0	0	0	0	0	0
F8VRX1;O95398;O95398-2;O95398-3	0	0	0	0	0	1	0	0	0	0	0
F8VS61	0	0.44108	0	0	0	0	0	0.55892	0	0	0
F8VTY2;Q8NFH4	0	1	0	0	0	0	0	0	0	0	0
F8VU90;Q9NYL4;Q9NYL4-2	0	0	0	0	0.526686	0	0	0.473314	0	0	0
F8VUB4;F8VV52;Q9NZN8
F8VUC5;F8VVA7;F8VXB1;F8VXR1;F8VYZ4;F8W156;P61923;P61923-4;P61923-5	0	0	0	0	0	1	0	0	0	0	0
F8VUF6;F8VWU0;F8VX58;F8VXZ8;P07585;P07585-4
F8VUJ3;Q8N4A0	0	0	0	0	0	0	0	0	1	0	0
F8VUY8;Q96QD8	0	0	0.44573	0	0	0	0	0	0.55427	0	0
F8VV56;F8VWK8;F8W022;P08962;P08962-2;P08962-3	0	0	0.283538	0	0.716462	0	0	0	0	0	0
F8VVL1;O43583
F8VW50;Q2TAC6;Q2TAC6-2;Q2TAC6-3	0	0	0.270187	0	0	0	0	0	0.729813	0	0
F8VWS0;P05388;P05388-2	0	0	0	0	0.557599	0	0	0.442401	0	0	0
F8VWT9;J3KPF0;Q9Y4D8;Q9Y4D8-4
F8VWW7;Q8NCJ5	0	0	0	0	0	0	0	0	0	0	1
F8VWY2;Q9UBM8;Q9UBM8-2	0	0	1	0	0	0	0	0	0	0	0
F8VWZ8;Q52LW3	0.738995	0	0	0	0	0	0	0	0	0.261005	0
F8VX10;F8VXI8;H0YIQ8;Q9H9L4	0	1	0	0	0	0	0	0	0	0	0
F8VXC8;Q8TAQ2;Q8TAQ2-2;Q8TAQ2-3	0	1	0	0	0	0	0	0	0	0	0
F8VXD5;Q53FV1	0	0	0	0	0.677069	0	0	0	0	0	0.322931
F8VXH0;J3KQA0
F8VXY6;G3V1V1;Q8TBF4	0	0	0	0	0	0	0	0	0	1	0
F8VYE8;P36873;P36873-2	0	1	0	0	0	0	0	0	0	0	0
F8VZA0;Q9H0K6	0	0	0	0	0	0	0	0.502812	0.497188	0	0
F8W038;Q8IXM2;Q8IXM2-3	0	0	0	0	0	1	0	0	0	0	0
F8W0A2	0	0	0.646608	0	0	0	0	0	0	0.353392	0
F8W0A3	0	1	0	0	0	0	0	0	0	0	0
F8W0Q9;Q8NEY8-2;Q8NEY8-8;Q8NEY8-9	0	1	0	0	0	0	0	0	0	0	0
F8W0U9;Q149M9;Q149M9-3	0	0	0.53736	0	0	0	0	0	0	0	0.46264
F8W111;P14384	0	0	0	0	0	0	0	0	0	0.429435	0.570565
F8W1A4;P54819;P54819-2	0	0	0	0.663596	0	0	0	0.336404	0	0	0
F8W1B3	0	0	0	0	1	0	0	0	0	0	0
F8W1C3;Q99542	0	0	0.214845	0	0	0	0	0	0	0.39422	0.390935
F8W1R9;P36897;P36897-2;P36897-3	0	0	0	0	1	0	0	0	0	0	0
F8W6G1;Q9UHY1	0	0	0	0	0	0	1	0	0	0	0
F8W6M3;H0Y6A5;Q9NYG2;Q9NYG2-2	0	0	0	0	0	0	0	0	1	0	0
F8W6W2	0	0	1	0	0	0	0	0	0	0	0
F8W703;Q9HCK4;Q9HCK4-2;Q9HCK4-3;R4GMM8	0	0.347551	0	0	0	0	0	0	0	0.265209	0.38724
F8W726
F8W727;P62910	0	0	0	0	0.523219	0	0	0.476781	0	0	0
F8W775	0	0	0.396032	0	0	0	0.603968	0	0	0	0
F8W776;Q8TC24;Q9H9S3;Q9H9S3-2;Q9H9S3-3	0	0	0	0	0	0	0	1	0	0	0
F8W7A7;J3KSU3;Q5BJE1;Q5BJE1-2;Q5BJE1-3;Q5BJE1-4	0	0	0	0	0	0	0	1	0	0	0
F8W7C6	0	0	0	0	0	0	0	1	0	0	0
F8W7L6;P42262;P42262-2;P42262-3;P42262-4
F8W7Q2	0	0	0	0	0	0	0	0	1	0	0
F8W7Q4;Q96A26	0	0	0	0	0	0	0	1	0	0	0
F8W7S5	0	1	0	0	0	0	0	0	0	0	0
F8W7T1;Q92784-3	0.419983	0	0	0	0	0	0.580017	0	0	0	0
F8W876;P48740;P48740-2;P48740-3;P48740-4	0	0	0	0	0	0	0	0	0	0.488053	0.511947
F8W8H5;Q969Q5	0	0	0	0.47612	0.52388	0	0	0	0	0	0
F8W930;Q9Y6M1;Q9Y6M1-1;Q9Y6M1-3;Q9Y6M1-4;Q9Y6M1-5;Q9Y6M1-6
F8W9E7;Q96BJ8;Q96BJ8-2;Q96BJ8-3	1	0	0	0	0	0	0	0	0	0	0
F8W9J4;Q03001	0	0.384303	0	0.615697	0	0	0	0	0	0	0
F8W9Q8;G3V426;Q86TW2;Q86TW2-2	0	0	0	0	0	0	0	1	0	0	0
F8W9U4	0	0	0.427756	0	0	0	0	0	0.572244	0	0
F8W9X7;Q567U6	0	0	0	0	0	0.490259	0	0	0.509741	0	0
F8WA11;Q7Z460;Q7Z460-2;Q7Z460-3;Q7Z460-4;Q7Z460-5	0	0	0	0	0	0	1	0	0	0	0
F8WAJ0;Q9H8H2;Q9H8H2-2;Q9H8H2-4	0	1	0	0	0	0	0	0	0	0	0
F8WAS2	0	0	0.207476	0	0	0	0	0	0.529827	0.262697	0
F8WB95;G3V0G5;Q8IV38	0	0	0.262561	0	0	0	0.737439	0	0	0	0
F8WBF9;Q5TH30;Q9UGV2;Q9UGV2-2;Q9UGV2-3	0	0	1	0	0	0	0	0	0	0	0
F8WBJ6;Q9NRX1	0	1	0	0	0	0	0	0	0	0	0
F8WBQ5;F8WDJ7;Q03938	0	0	0	0.287524	0	0	0	0.368028	0	0	0.344448
F8WBW1;F8WC41;Q86X83;Q86X83-2
F8WC62;Q96KD3;Q96KD3-2
F8WCX2;H0Y5I5;Q8N1G0;Q8N1G0-2	0	0	0.482633	0	0	0	0	0	0	0.517367	0
F8WDE4;Q9NP87;Q9NP87-2	0	0	1	0	0	0	0	0	0	0	0
F8WDT6;H7C2C9	0	0	0.335931	0	0	0.278626	0	0	0.385443	0	0
F8WDV0;Q9UI26;Q9UI26-2	0	0	0	0	0	0	1	0	0	0	0
F8WDW2	0	1	0	0	0	0	0	0	0	0	0
F8WEA2	0	0	0.171533	0	0.352506	0	0	0	0	0.22202	0.253941
F8WEM8	0	0	0	0	0	0	0	0	1	0	0
[truncated: 5,988 more rows]

## Sheet: 05_H
PROTEIN	in_chow	in_fed	in_fasted		chow vs. HFHF fed			chow vs. HFHF fasted
A0A024QZ33;K7EK40;K7EMD8;K7ERM9;Q9H0G5	TRUE	TRUE	TRUE		RLS Category	Count		RLS Category	Count
A0A024QZW4;Q9H1N7	TRUE	TRUE	TRUE		RLS = 2	1028		RLS = 2	984
A0A024QZX5;A0A087X1N8;A0A2R8YD12;P35237	TRUE	TRUE	TRUE		1 ≤ RLS < 2	1025		1 ≤ RLS < 2	1023
A0A024R3B9;E9PJL7;E9PNH7;E9PRA8;P02511	TRUE	TRUE	TRUE		0 < RLS < 1	2027		0 < RLS < 1	2016
A0A024R3M2;A0A1B0GUD6;A0A1B0GWG7;A0A2R8Y5X2;J3KNL5;Q3KR37;Q3KR37-2;Q3KR37-3;Q3KR37-4	FALSE	TRUE	TRUE		RLS = 0	3770		RLS = 0	3708
A0A024R4E5;Q00341	TRUE	TRUE	TRUE
A0A024R571;Q9H4M9	TRUE	TRUE	TRUE
A0A024R5I4;O94956	TRUE	TRUE	TRUE
A0A024R6I7;P01009	TRUE	TRUE	TRUE
A0A024R7E8;K7EMV4;K7EN05;K7EPC8;K7EQ44;P60002	FALSE	TRUE	TRUE
A0A024R7W5;A0A087WY31;A0A087X0Q1;Q7Z739	TRUE	TRUE	TRUE
A0A024RA52;P25787	TRUE	TRUE	TRUE
A0A024RAC6;Q14241	TRUE	TRUE	TRUE
A0A024RBG1;Q9NZJ9-2	TRUE	TRUE	TRUE
A0A024RCG2;Q96BI1	TRUE	TRUE	TRUE
A0A024RCN4;A0A087X2F1;B4DMT1;Q16670;Q16670-2	TRUE	TRUE	TRUE
A0A024RCQ8;A0A0G2JH76;A0A0G2JHB6;A0A0G2JIU6;A0A0G2JK02;A0A0G2JKR3;A0A0G2JLA3;A0A0G2JLL3;A0A140T8X7;A0A140T9Y1;G8JLL2;Q9UMR5;Q9UMR5-2;Q9UMR5-3	TRUE	TRUE	TRUE
A0A024RCR6;A0A0G2JK23;P46379;P46379-2;P46379-3	TRUE	TRUE	TRUE
A0A044PY82	TRUE	TRUE	TRUE
A0A067XG54;Q8NB49;Q8NB49-2;Q8NB49-3;Q8NB49-4	TRUE	TRUE	TRUE
A0A075B6F0;H7BXG6;M0R167;Q9H0D2;Q9H0D2-2	TRUE	TRUE	FALSE
A0A075B6F9;Q9Y314	TRUE	TRUE	TRUE
A0A075B6G3;A0A087WTU7;A0A087WV90;A0A5H1ZRP8;P11532;P11532-11;P11532-4	TRUE	TRUE	TRUE
A0A075B6U9	TRUE	TRUE	TRUE
A0A075B6W5	TRUE	TRUE	TRUE
A0A075B727;A0A075B728;P16284;P16284-2;P16284-3;P16284-4;P16284-5;P16284-6	TRUE	TRUE	TRUE
A0A075B730;P58107	TRUE	TRUE	TRUE
A0A075B749;A0A087WX83;Q5VU43;Q5VU43-3;Q5VU43-4	TRUE	TRUE	TRUE
A0A075B754;Q96QE3;Q96QE3-2	TRUE	TRUE	TRUE
A0A075B757;A0A075B762;A0A087WTQ0;A0A087WUR2;A0A087WVU4;A0A087WYI5;A0A087WZJ2;A0A087X002	FALSE	FALSE	TRUE
A0A075B773;K7ELY8;O00623	TRUE	TRUE	TRUE
A0A075B784;E9PEW0;K7ELR5;Q8IXW9;Q9P275	TRUE	TRUE	TRUE
A0A075B7B1;C9JIE4;O15061;O15061-2;O15061-3	TRUE	TRUE	TRUE
A0A075B7B5;B7ZM87;O75044	TRUE	TRUE	TRUE
A0A075B7F1;S4R3C0	TRUE	TRUE	TRUE
A0A087WSV6;A0A087WSX8;A0A0B4J1W1;A0A0G2JLS4;A0A0G2JM99;A0A0G2JMY9;A0A0G2JNK9;A0A0G2JNM2;A0A0G2JNQ6;A0A0G2JNR3;A0A0G2JP64;A0A0G2JP80;A0A0G2JP96;A0A0G2JQ15;A0A0G2JQ44;A0A0G2JQ46;A8MVE2;D9IDM5;D9IDM6;F6RVM3;F6TER3;O75019;O75019-2;Q8N6C8;Q8N6C8-3;Q8NHL6;Q8NHL6-2;Q8NHL6-3;Q8NHL6-4;Q8NHL6-5	TRUE	TRUE	TRUE
A0A087WSW7;A0A0B4J1V9;F6XU50;Q9NRZ9;Q9NRZ9-2;Q9NRZ9-3;Q9NRZ9-4;Q9NRZ9-5;Q9NRZ9-6	TRUE	TRUE	TRUE
A0A087WSW9;A0A087WSY9;Q16881;Q16881-3;Q16881-4	TRUE	TRUE	TRUE
A0A087WSY1;O15146;O15146-2;O15146-3;Q5T0B5	TRUE	FALSE	TRUE
A0A087WSY5;Q96IY4	TRUE	TRUE	TRUE
A0A087WSZ7;A0A1B0GW84;D6RHE0;Q08493;Q08493-2;Q08493-3;Q08499;Q08499-10;Q08499-11;Q08499-2;Q08499-3;Q08499-4;Q08499-5;Q08499-6;Q08499-8;Q08499-9;Q32MM7	TRUE	TRUE	FALSE
A0A087WT18;Q96A73;Q96A73-2	TRUE	TRUE	TRUE
A0A087WT20;Q9NV06	TRUE	TRUE	TRUE
A0A087WT23;A0A087WV67;O00124;O00124-3	TRUE	TRUE	TRUE
A0A087WT30;J3KN91;Q8N5I9	FALSE	TRUE	TRUE
A0A087WT34	TRUE	TRUE	TRUE
A0A087WT44	TRUE	TRUE	TRUE
A0A087WT58;A6NES4	FALSE	TRUE	TRUE
A0A087WT59;P02766	TRUE	TRUE	TRUE
A0A087WT84;Q9H9V9;Q9H9V9-2	TRUE	TRUE	TRUE
A0A087WT87;P43003;P43003-2	TRUE	TRUE	TRUE
A0A087WT91;A0A087WVF3;A0A087WXS9;A0A087X179;A0A087X1G2;A0A0G2JLM6;A0A0G2JMF6;A0A0G2JP35;A0A0G2JPY0;A6NDS4;A6NER0;B9A6J9;P0C7X1;Q6DHY5;Q6IPX1;Q8IZP1	FALSE	FALSE	TRUE
A0A087WT95;P49753	TRUE	TRUE	TRUE
A0A087WTA5;E7ERK9;Q9UI10;Q9UI10-2;Q9UI10-3	TRUE	TRUE	TRUE
A0A087WTA8;P08123	TRUE	TRUE	TRUE
A0A087WTE4;A0A087WTF6;A0A087WV75;A0A087WVU1;A0A087WWD4;A0A087WWJ5;A0A087WX77;A0A087WZS4;A0A087X1V2;A0A0D9SF98;H7BYX6;P13591;P13591-1;P13591-3;P13591-4	FALSE	TRUE	FALSE
A0A087WTF0;A2A3K4;A2A3K4-2	FALSE	TRUE	TRUE
A0A087WTG8	FALSE	TRUE	FALSE
A0A087WTJ6;O14627;P47902;P47902-2;Q99626	TRUE	TRUE	TRUE
A0A087WTK0;A0A087WVC6;Q12913	TRUE	TRUE	TRUE
A0A087WTM1;Q9Y6N7;Q9Y6N7-2;Q9Y6N7-3;Q9Y6N7-4;Q9Y6N7-5;Q9Y6N7-6	TRUE	TRUE	TRUE
A0A087WTP3;Q92945	TRUE	TRUE	TRUE
A0A087WTQ2;A0A3B3IT47;C9JGR9;E7EQ49;Q9Y2I8;Q9Y2I8-2;Q9Y2I8-3	TRUE	TRUE	TRUE
A0A087WTS0;H0YJK8;P18283	TRUE	TRUE	TRUE
A0A087WTT2;Q5JWB9;Q96A57;Q96A57-2	TRUE	TRUE	TRUE
A0A087WTU3;Q9Y6I9	TRUE	TRUE	TRUE
A0A087WTV6;A0A087WZR9;Q96C36	TRUE	TRUE	TRUE
A0A087WTY4;P49454	TRUE	TRUE	TRUE
A0A087WTY7;Q9H227	TRUE	TRUE	TRUE
A0A087WTZ8;E5RFJ1;E5RHW9;E5RIM1;Q96MF7	TRUE	TRUE	TRUE
A0A087WU02;Q96RQ1	TRUE	TRUE	TRUE
A0A087WU05;A0A087WY48;Q8IY22;Q8IY22-2;Q8IY22-3	TRUE	TRUE	TRUE
A0A087WU07;Q5TGZ0;Q5TGZ0-2	TRUE	TRUE	TRUE
A0A087WU25	TRUE	TRUE	TRUE
A0A087WU31;A0A0A0MTB7;E9PE15;P51790;P51790-2;P51790-4;P51790-5	TRUE	TRUE	TRUE
A0A087WU37;A0A087WWG3;A0A087X140;A0A0A0MRU4;A0A0A6YYH9;C9J3G2;H0Y857;Q5JTY5;Q5JTY5-2;Q5RIA9;Q5RIA9-3;Q5RIB0;Q5RIB3;Q8IUF1;Q9BRT8;Q9BRT8-2;Q9BRT8-3	TRUE	TRUE	TRUE
A0A087WU46;A0A0A0MSL2;A0A0C4DGN9;B4DWF2;Q13422;Q13422-2;Q9UKS7;Q9UKS7-2;Q9UKS7-4;Q9UKS7-6;Q9UKT9;Q9UKT9-10;Q9UKT9-14;Q9UKT9-15;Q9UKT9-2;Q9UKT9-4;Q9UKT9-7;Q9UKT9-9	FALSE	TRUE	FALSE
A0A087WU51	TRUE	TRUE	TRUE
A0A087WU53;Q9H0U3	TRUE	TRUE	TRUE
A0A087WUB9;Q8WYA6;Q8WYA6-4	TRUE	TRUE	TRUE
A0A087WUC6;E9PI68;Q15005	TRUE	TRUE	TRUE
A0A087WUD3;Q9NRP0;Q9NRP0-2	TRUE	TRUE	TRUE
A0A087WUE2	TRUE	TRUE	TRUE
A0A087WUE4;A0A0G2JNN3;C9JMY0;Q96PV6;Q96PV6-1	TRUE	TRUE	TRUE
A0A087WUE6;A4PB68;Q3T8J9;Q3T8J9-2;Q3T8J9-3;Q9H869;Q9H869-2;Q9H869-3;Q9H869-4;Q9H869-5;Q9H869-6;Q9H869-7;Q9H869-8;Q9H869-9	TRUE	TRUE	TRUE
A0A087WUI6;Q8WXW3	TRUE	TRUE	TRUE
A0A087WUJ1;Q9H400;Q9H400-2	TRUE	TRUE	TRUE
A0A087WUJ4;Q92618	TRUE	TRUE	FALSE
A0A087WUK2;O14979;O14979-2;O14979-3	TRUE	TRUE	TRUE
A0A087WUL2	TRUE	TRUE	TRUE
A0A087WUL4;A0A087WX23;A0A087WZG9;B4DSP0	TRUE	TRUE	TRUE
A0A087WUM5;Q5VZR0;Q9H4G4	TRUE	TRUE	TRUE
A0A087WUQ6;P07203	TRUE	TRUE	TRUE
A0A087WUT0;A0A0A0MR39	TRUE	TRUE	TRUE
A0A087WUT6;O60841	TRUE	TRUE	TRUE
A0A087WUU8;M0R3J2	TRUE	TRUE	TRUE
A0A087WUV7;A0A3B3IS76;A0A3B3ISL9;A0A3B3ISM6;A0A3B3ISX6;A0A3B3ITJ2;A0A3B3IUC8;P10746;Q5T3L9	FALSE	TRUE	TRUE
A0A087WUV9	TRUE	TRUE	FALSE
A0A087WUW6;A0A087X0G7;A0A087X1B1;Q9Y6K9;Q9Y6K9-2;Q9Y6K9-3	FALSE	TRUE	TRUE
A0A087WUW9;Q9NXU5	TRUE	TRUE	TRUE
A0A087WUZ7;Q9Y5W8;Q9Y5W8-2	TRUE	TRUE	TRUE
A0A087WV01	TRUE	TRUE	TRUE
A0A087WV05;Q99417	TRUE	TRUE	TRUE
A0A087WV24;P20711;P20711-3	TRUE	TRUE	TRUE
A0A087WV25;O95684;O95684-2	TRUE	TRUE	TRUE
A0A087WV39;Q92698;V9GYD3	TRUE	TRUE	TRUE
A0A087WV61;G3V112;H0YBV2;Q8NE09;Q8NE09-3	FALSE	FALSE	TRUE
A0A087WV96	TRUE	TRUE	FALSE
A0A087WV97;Q8WU79;Q8WU79-2;Q8WU79-3	TRUE	TRUE	TRUE
A0A087WVA1;P62341	TRUE	TRUE	TRUE
A0A087WVA8;Q8IWB9;Q8IWB9-2	TRUE	TRUE	TRUE
A0A087WVC1;Q9BQ39	TRUE	TRUE	TRUE
A0A087WVE2;O00602	TRUE	TRUE	TRUE
A0A087WVF1;K7EQH1;Q96B23;Q96B23-2	TRUE	TRUE	TRUE
A0A087WVF7;Q9NZM3;Q9NZM3-2	TRUE	TRUE	TRUE
A0A087WVI0;E9PBL8;Q8WTW3	TRUE	TRUE	TRUE
A0A087WVM1;P78382;P78382-2;Q5W1L7	TRUE	TRUE	TRUE
A0A087WVM4;B7ZM99	TRUE	TRUE	TRUE
A0A087WVP7;P0C024;P0C024-2	TRUE	TRUE	TRUE
A0A087WVQ6;Q00610;Q00610-2	TRUE	TRUE	TRUE
A0A087WVS8;Q70IA6;Q70IA6-3	TRUE	TRUE	TRUE
A0A087WVT6;A0A087X159;D6RAC5;P81877;P81877-2;P81877-3;P81877-4;P81877-5;Q9BWW4;Q9BWW4-2;Q9BWW4-3	TRUE	TRUE	TRUE
A0A087WVT8;A0A087X1L3;Q6ZWJ8	TRUE	TRUE	TRUE
A0A087WVX4;P49895;P49895-2;P49895-4	TRUE	TRUE	TRUE
A0A087WVX5;A0A1B0GTA9;A0A1B0GTF6;A0A1B0GTN8;A0A1B0GTP5;A0A1B0GTS4;A0A1B0GTX2;A0A1B0GU53;A0A1B0GUI8;A0A1B0GUK4;A0A1B0GVB2;A0A1B0GWF9;A0A1C7CYX2;A0A2R8Y555;A0A2U3TZM7;A0A494C0B2;A0A494C0Z9;A0A494C184;E7EN11;F8VNV8;F8VU10;F8VUW8;H0Y476;O00305;O00305-2;O00305-3;O00305-4;P54284;P54284-2;P54284-3;P54284-4;P54284-5;Q02641;Q02641-2;Q02641-3;Q08289;Q08289-10;Q08289-2;Q08289-3;Q08289-4;Q08289-5;Q08289-6;Q0…	TRUE	TRUE	TRUE
A0A087WVZ7;A0A087X068;Q9UJW7;Q9UJW7-2	TRUE	TRUE	TRUE
A0A087WVZ9;A0A0A0MQR7;P19388	TRUE	TRUE	TRUE
A0A087WW00;C9J9H9;P51668;Q9Y2X8	FALSE	TRUE	TRUE
A0A087WW06;B0QYP5;Q96AY4	TRUE	TRUE	TRUE
A0A087WW23;P20292	TRUE	TRUE	TRUE
A0A087WW28	TRUE	TRUE	TRUE
A0A087WW48;E7ET14;H0Y3N9;H0Y589;O75151;Q9UPP1;Q9UPP1-2;Q9UPP1-3;Q9UPP1-4;Q9UPP1-5	TRUE	TRUE	TRUE
A0A087WW58;Q9C0D9	TRUE	TRUE	TRUE
A0A087WW59;Q7Z7L8	TRUE	TRUE	TRUE
A0A087WW66;Q99460;Q99460-2	TRUE	TRUE	TRUE
A0A087WW76;A0A1B0GTZ9;A0A1B0GV73;A0A452Q6Z5;H0Y468;Q5T5U3	TRUE	TRUE	TRUE
A0A087WW77;Q15334	TRUE	TRUE	TRUE
A0A087WW83;A0A087X0K8;Q6PRD1	FALSE	TRUE	FALSE
A0A087WWA3;O60333;O60333-2;O60333-4;Q4R9M9	TRUE	TRUE	TRUE
A0A087WWA7;O14640;O14640-2;P54792;P54792-2	TRUE	TRUE	TRUE
A0A087WWF6;F8W8R3;P49005	TRUE	TRUE	TRUE
A0A087WWG5	TRUE	TRUE	TRUE
A0A087WWH3;Q9NZM4;Q9NZM4-2	TRUE	TRUE	TRUE
A0A087WWI0	TRUE	TRUE	TRUE
A0A087WWM0;O43617	TRUE	TRUE	TRUE
A0A087WWM4;H0YNJ6;Q9P2T1;Q9P2T1-2	TRUE	TRUE	TRUE
A0A087WWM6;E7EQL6;O43272;O43272-1;O43272-2	TRUE	TRUE	TRUE
A0A087WWP4;A0A494C001;A0A499FJY3;Q96T37;Q96T37-2;Q96T37-3;Q96T37-4	TRUE	TRUE	TRUE
A0A087WWP5;Q12962	TRUE	TRUE	TRUE
A0A087WWP8;A0A0C4DGT8;A0A0C4DH79;Q5VWQ0;Q5VWQ0-4	TRUE	TRUE	TRUE
A0A087WWQ2;Q92979;V9GYP5	TRUE	TRUE	TRUE
A0A087WWR2;H3BQI4;H3BQS2;I3L2Z5;P56270;P56270-2;P56270-3;P56270-4	TRUE	TRUE	TRUE
A0A087WWS1;Q96FV9	TRUE	TRUE	TRUE
A0A087WWT7;A0A1W2PRP3;Q7Z7M1	TRUE	TRUE	TRUE
A0A087WWU8	TRUE	TRUE	TRUE
A0A087WWW9;O95999	TRUE	TRUE	TRUE
A0A087WWY0;P08519	TRUE	TRUE	TRUE
A0A087WX02;F8WB74;M0QYX1;P63302	TRUE	TRUE	TRUE
A0A087WX10;G3V4M2;G3V5E8;P54803	TRUE	TRUE	TRUE
A0A087WX11;J3KNG8;Q8TF40;Q8TF40-3	TRUE	TRUE	TRUE
A0A087WX19;A0A087WX45;C9J5R6	TRUE	TRUE	TRUE
A0A087WX22;H3BVG2;Q2M296-3;Q2M296-4	FALSE	TRUE	TRUE
A0A087WX80;A0A087WYF1;P24043	TRUE	TRUE	TRUE
A0A087WX97;Q9BXK5	TRUE	TRUE	TRUE
A0A087WX99;A0A0G2JRA4;P55283;P55283-2	TRUE	TRUE	TRUE
A0A087WXB0;O15126	TRUE	TRUE	TRUE
A0A087WXB8;C9J0E2;C9J480;C9JWJ3;C9JXM2;Q9Y274	TRUE	TRUE	FALSE
A0A087WXC5;E7ESZ7;O95299	TRUE	TRUE	TRUE
A0A087WXD1;Q96T83	TRUE	TRUE	TRUE
A0A087WXF8;A0A087WYV3;A0A0D9SEW3;Q9NP64;Q9NP64-2;Q9NP64-3	FALSE	TRUE	TRUE
A0A087WXI2;Q9Y6R7	TRUE	TRUE	TRUE
A0A087WXI5;P12830;P12830-2	TRUE	TRUE	TRUE
A0A087WXK4;Q7Z3F1	TRUE	TRUE	FALSE
A0A087WXL0;A0A087X1G7;A0A0J9YX89;A0A3B3IT39;A8MZD0;O60613;O60613-2	FALSE	TRUE	TRUE
A0A087WXL6;B7Z879;Q9H270	TRUE	TRUE	TRUE
A0A087WXM6;A0A0A6YYL6;J3KRX5;J3QQT2;P18621;P18621-3	TRUE	TRUE	TRUE
A0A087WXN9;Q765P7	TRUE	TRUE	TRUE
A0A087WXP0	FALSE	TRUE	TRUE
A0A087WXS6;C9JBF1	TRUE	TRUE	TRUE
A0A087WXU0;A0A2R8Y4J4;Q9NWS8;Q9NWS8-2	TRUE	TRUE	TRUE
A0A087WXV4;P41235;P41235-2;P41235-4;P41235-5;P41235-6	TRUE	TRUE	TRUE
A0A087WXW3;Q9Y3P8	TRUE	TRUE	TRUE
A0A087WXW6;A0A140TA70;A0A140TA74;A9JR48;Q9BXA9;Q9BXA9-2;Q9BXA9-3;Q9BXA9-4	TRUE	TRUE	TRUE
A0A087WXX8	FALSE	TRUE	TRUE
A0A087WY00;F8W6H6;F8WE88;G3V394;Q9Y4I1;Q9Y4I1-2;Q9Y4I1-3	TRUE	TRUE	TRUE
A0A087WY55;Q9NP79	TRUE	TRUE	TRUE
A0A087WY67;P0CG29;P0CG30;Q6ICJ4	TRUE	TRUE	TRUE
A0A087WY71;Q96CW1;Q96CW1-2	TRUE	TRUE	TRUE
A0A087WY85;A0A0A0MQU3;D6RAH7;D6RFM0;H9KV45;P61077;P61077-2;P61077-3;P62837;P62837-2	TRUE	TRUE	TRUE
A0A087WYA1;Q9UKN7	FALSE	TRUE	TRUE
A0A087WYD6;A0A0G2JLV0;Q03519;X5CMH5	TRUE	TRUE	TRUE
A0A087WYF2;F5H2F2;P54687;P54687-2;P54687-3;P54687-4;P54687-5	FALSE	TRUE	TRUE
A0A087WYF7;Q6UXV4	TRUE	TRUE	TRUE
A0A087WYJ2;M0QZR8;M0R2B7;P28340	TRUE	TRUE	TRUE
A0A087WYL3;Q17R60	TRUE	FALSE	TRUE
A0A087WYL6;A0A087WZG6;A0A087X1S9;Q8TEW8;Q8TEW8-2;Q8TEW8-3;Q8TEW8-5;Q8TEW8-6;R4GN62	TRUE	TRUE	TRUE
A0A087WYM1;C9JRR9;P42575;P42575-2;P42575-3	FALSE	TRUE	FALSE
A0A087WYM3;A0A0A0MRF5;E7EWX6;Q8IXJ6;Q8IXJ6-2;Q8IXJ6-3;Q8IXJ6-4	TRUE	TRUE	TRUE
A0A087WYM5;A0A494C058;A0A494C075;A0A494C0M8;A0A494C171;A0A494C1C3;Q9BVV6;Q9BVV6-2;Q9BVV6-3;Q9BVV6-4	FALSE	TRUE	FALSE
A0A087WYN9;Q7Z478	TRUE	TRUE	TRUE
A0A087WYP2;Q8IZQ5	TRUE	TRUE	TRUE
A0A087WYR0;P09132	TRUE	TRUE	TRUE
A0A087WYS3;Q9ULU4;Q9ULU4-10;Q9ULU4-11;Q9ULU4-12;Q9ULU4-13;Q9ULU4-19;Q9ULU4-22;Q9ULU4-7;Q9ULU4-8;Q9ULU4-9	TRUE	TRUE	TRUE
A0A087WYT3;Q15185;Q15185-4	TRUE	TRUE	TRUE
A0A087WYV9;A0A087X1F5;P57105	TRUE	TRUE	TRUE
A0A087WYX8;A0A1W2PQW0;A0A590UJL7;A0A5F9ZH12;A0A5F9ZHT2;A0A6Q8PH73;Q14CM0	TRUE	TRUE	TRUE
A0A087WYY0;A0A087X260;B1AKP7;G3V162;Q13148	TRUE	TRUE	TRUE
A0A087WZ13;E9PAU2;Q8IY67;Q8IY67-2	TRUE	TRUE	TRUE
A0A087WZ32;A8K727;Q9HB19	TRUE	TRUE	TRUE
A0A087WZ40;Q14244;Q14244-6;Q14244-7	TRUE	TRUE	TRUE
A0A087WZ50;Q8TCT7;Q8TCT7-2;Q8TCT7-4	TRUE	TRUE	FALSE
A0A087WZ62;Q9H6U8;Q9H6U8-3	TRUE	TRUE	TRUE
A0A087WZ97;A0A087WZK6;A0A087X2C2;Q5T7M9	TRUE	TRUE	TRUE
A0A087WZB5	TRUE	TRUE	TRUE
A0A087WZC1;Q6IN84;Q6IN84-2	FALSE	TRUE	TRUE
A0A087WZC2;A0A0C4DGS8;E0YMJ8;P35680;P35680-2;P35680-3;P35680-4	TRUE	TRUE	TRUE
A0A087WZE9	TRUE	TRUE	TRUE
A0A087WZG4;A0A3B3IPE9;A0A590UK10;Q6ZSZ5;Q6ZSZ5-1;Q6ZSZ5-2;Q6ZSZ5-5;Q6ZSZ5-6	TRUE	TRUE	TRUE
A0A087WZJ5	FALSE	TRUE	TRUE
A0A087WZK0;M0R1T4;P49366;P49366-2;P49366-3	FALSE	TRUE	TRUE
A0A087WZK9;B3KS98;O15372	TRUE	TRUE	TRUE
A0A087WZM2;D6REQ6;D6RHI9;O00584	TRUE	TRUE	TRUE
A0A087WZM8;Q8TBM7;Q8TBM7-2;Q8TBM7-3	TRUE	TRUE	TRUE
A0A087WZN1;O43837	TRUE	TRUE	TRUE
A0A087WZP9	TRUE	TRUE	TRUE
A0A087WZQ7;Q9H115	TRUE	TRUE	TRUE
A0A087WZT0;M0QY61;M0QZ22;M0R0X3;Q5PRF9	TRUE	TRUE	TRUE
A0A087WZT2;Q6UX53	TRUE	TRUE	TRUE
A0A087WZT3;Q9H3K6	TRUE	TRUE	TRUE
A0A087WZU2;E5RGN0;Q00536;Q00536-2;Q00536-3	TRUE	TRUE	TRUE
A0A087WZU5;O43657	TRUE	TRUE	TRUE
A0A087WZV0;O43314	TRUE	TRUE	TRUE
A0A087WZY2;A6NIV2;Q9P0U1	FALSE	TRUE	TRUE
A0A087WZY5;A8MXH5;F5H3Q5;F5H851;Q14031;Q14031-2	TRUE	TRUE	TRUE
A0A087X011;E9PES4;J3KPF9;Q9Y496	TRUE	TRUE	TRUE
A0A087X020;Q9Y3A5	TRUE	TRUE	TRUE
A0A087X080;A0A0U1RRH1;A0A0X1KG73;Q15413;Q15413-2;Q15413-3	TRUE	TRUE	TRUE
A0A087X091	TRUE	TRUE	TRUE
A0A087X0D5;P09668	TRUE	TRUE	TRUE
A0A087X0F1;Q9UK61;Q9UK61-2;Q9UK61-3;Q9UK61-4	TRUE	TRUE	TRUE
A0A087X0H5;P10912;P10912-4	FALSE	FALSE	TRUE
A0A087X0H7;A0A669KAW5;A0A669KB51;A0A6E1W401;Q8NEL9;Q8NEL9-2;Q8NEL9-3;Q8NEL9-4	FALSE	TRUE	FALSE
A0A087X0H8;Q15714;Q15714-2;Q15714-3	TRUE	TRUE	TRUE
A0A087X0H9;Q5T8P6	TRUE	TRUE	TRUE
A0A087X0K0;P39059	TRUE	TRUE	TRUE
A0A087X0K4;Q7Z408;Q7Z408-2;Q7Z408-4	TRUE	TRUE	TRUE
A0A087X0K9	TRUE	TRUE	TRUE
A0A087X0L7;E7EVY0;J3KNA0;Q15070;Q15070-2	TRUE	TRUE	TRUE
A0A087X0M4;Q9BWU0	TRUE	TRUE	TRUE
A0A087X0N2;A0A3B3ISI6;O15243	FALSE	FALSE	TRUE
A0A087X0P0	TRUE	TRUE	TRUE
A0A087X0Q9;Q9BVL4	TRUE	TRUE	TRUE
A0A087X0R6;Q9UMY4;Q9UMY4-1	TRUE	TRUE	TRUE
A0A087X0R7;Q9H4L4	TRUE	TRUE	TRUE
A0A087X0R9;B8ZZK1;Q07837;Q07837-2;Q07837-5;Q07837-6;Q07837-7	TRUE	TRUE	TRUE
A0A087X0S5;P12109	TRUE	TRUE	TRUE
A0A087X0T5;Q96AB6	TRUE	TRUE	TRUE
A0A087X0V5;P29728;P29728-2	TRUE	TRUE	TRUE
A0A087X0W8;Q04206;Q04206-2;Q04206-3;Q04206-4;Q2TAM5	TRUE	TRUE	TRUE
A0A087X0W9;Q8N6M0	TRUE	TRUE	TRUE
A0A087X0X3;P52272;P52272-2	TRUE	TRUE	TRUE
A0A087X0Y2;A0A087X248;A0A087X2I9;A0A096LPD8;F5GWV3;F5H3N7;F5H8B4;O14607;O14607-2;O14607-3;O14607-4;O14607-5	TRUE	TRUE	TRUE
A0A087X108	TRUE	TRUE	TRUE
A0A087X117;A0A0G2JN29;Q15155	TRUE	TRUE	TRUE
A0A087X127	FALSE	TRUE	FALSE
A0A087X138;Q8TF71	TRUE	TRUE	TRUE
A0A087X1A8;A0A2R8Y3X7;D3VVH9;F5H211;G3V3R7;P54252;P54252-1;P54252-4	TRUE	TRUE	TRUE
A0A087X1B2	TRUE	TRUE	TRUE
A0A087X1B6;E9PEG3;F5GZG9;P10275;P10275-3;P10275-4	TRUE	TRUE	TRUE
A0A087X1D0	FALSE	TRUE	FALSE
A0A087X1E4;P53365;P53365-3	TRUE	TRUE	TRUE
A0A087X1G1;H7BYD0;Q16718;Q16718-2	TRUE	TRUE	TRUE
A0A087X1G4	TRUE	TRUE	TRUE
A0A087X1J2	TRUE	TRUE	TRUE
A0A087X1J7;P22352	TRUE	TRUE	TRUE
A0A087X1K1;Q96C00	TRUE	TRUE	TRUE
A0A087X1N0;Q9H3C7	FALSE	TRUE	TRUE
A0A087X1N3;F8WC38;O75818;O75818-2	TRUE	TRUE	TRUE
A0A087X1N7;P20929;P20929-2;P20929-3;P20929-4	TRUE	TRUE	TRUE
A0A087X1P3;C9IYE1;F8W8P5;H7BYR4;Q86UW7;Q86UW7-2;Q86UW7-3	TRUE	TRUE	TRUE
A0A087X1P5;J3KQ41;J3QT95;Q9H9Q2;Q9H9Q2-3	TRUE	TRUE	TRUE
A0A087X1R3;A0A0C4DGX0;A6QL64;Q8N2N9	TRUE	TRUE	TRUE
A0A087X1S3	TRUE	TRUE	TRUE
A0A087X1T7;A0A5K1VW97;H0YMF1;P16112;P16112-2;P16112-3	FALSE	FALSE	TRUE
A0A087X1U5;F5H7T0;F6RJM5;Q96S38;Q96S38-2	FALSE	TRUE	TRUE
A0A087X1W8;A0A0A0MTJ8;Q9BY67;Q9BY67-3;Q9BY67-4;Q9BY67-5;X5DQS5	TRUE	TRUE	TRUE
A0A087X1Z1;A0A0G2JPW5;A0A0G2JQX1;A0A0G2JSA7;Q96RT8;Q96RT8-2	TRUE	TRUE	TRUE
A0A087X1Z3;Q9UL46	TRUE	TRUE	TRUE
A0A087X236;A0A0A0MRE2;C9J2A8;Q9NVP4;Q9NVP4-2;Q9NVP4-3;Q9NVP4-4;Q9NVP4-5	TRUE	TRUE	FALSE
A0A087X241;Q2NKQ1;Q2NKQ1-3;Q2NKQ1-4	TRUE	TRUE	TRUE
A0A087X256;Q2M389	TRUE	TRUE	TRUE
A0A087X266;Q9BXJ8	TRUE	TRUE	TRUE
A0A087X279;P09913	TRUE	TRUE	TRUE
A0A087X283;A0A1B0GX65;B7Z306;C9J180;C9J2P0;H7C061;P51965;P51965-2;P51965-3;Q969T4;Q96LR5;R4GN77;R4GND1	FALSE	TRUE	TRUE
A0A087X294;O75914;O75914-2;O75914-3;O75914-4	TRUE	TRUE	TRUE
A0A087X295;E9PDU5;Q9NNW5	TRUE	TRUE	TRUE
A0A087X296;P23219;P23219-2;P23219-3;P23219-4;P23219-5;P23219-6	TRUE	TRUE	TRUE
A0A087X2A7;H0YBA5;H7BY63;Q8NB25;Q8NB25-2;Q8NB25-3;Q8NB25-4	TRUE	TRUE	TRUE
A0A087X2B2;E9PMH5;Q13490;Q13490-2	FALSE	TRUE	TRUE
A0A087X2B5;P35613;P35613-2	TRUE	TRUE	TRUE
A0A087X2B6	FALSE	FALSE	TRUE
A0A087X2D5;Q9BRJ2	TRUE	TRUE	TRUE
A0A087X2D8;O60271-2;O60271-4	TRUE	TRUE	TRUE
A0A087X2G6;A0A0C4DGU5;D6RIC3;Q9Y3C1;Q9Y3C1-2;Q9Y3C1-3	TRUE	TRUE	TRUE
A0A087X2I1;P62333	TRUE	TRUE	TRUE
A0A088AWN3;A0A0A0MSY4;Q9BZ29;Q9BZ29-3;Q9BZ29-4;Q9BZ29-5	TRUE	TRUE	TRUE
A0A088AWN8;E7EP87;E9PH27;J3KS48;J3KT43;J3QRB0;Q9UHQ1;Q9UHQ1-2;Q9UHQ1-3;Q9UHQ1-4	TRUE	TRUE	TRUE
A0A088AWP2;A0A0C4DG41;A8MX39;A8MZ24;B5MDW0;P11308;P11308-1;P11308-2;P11308-3;P11308-5;P11308-6	FALSE	TRUE	TRUE
A0A088AWP5;E9PDC2;H7BZH9;Q8WUY3;Q8WUY3-2;Q8WUY3-3;Q8WUY3-4	FALSE	TRUE	TRUE
A0A090HNM7;A0A1W2PS85;P28715;R4GMW8	TRUE	TRUE	TRUE
A0A096LNH6;Q14185	TRUE	TRUE	TRUE
A0A096LNV3;A0A096LP02;Q9Y508;Q9Y508-2	TRUE	TRUE	TRUE
A0A096LP07;A0A096LPJ3;A8K070	TRUE	TRUE	FALSE
A0A096LP22;A0A096LP34;C9J7Z1;Q86Y79	TRUE	TRUE	TRUE
A0A096LP69	TRUE	TRUE	TRUE
A0A096LPC5;A0A0A0MR88;Q9Y4E1;Q9Y4E1-1;Q9Y4E1-2;Q9Y4E1-6	TRUE	TRUE	TRUE
A0A096LPE2	TRUE	TRUE	TRUE
A0A096LPI6	TRUE	TRUE	TRUE
A0A096LPJ4;P05161	TRUE	TRUE	TRUE
A0A096LPJ9;A0A140G945;A0A140G945-2;E7EWH7;P02489	TRUE	TRUE	TRUE
A0A0A0MQR2;Q9BY42	TRUE	TRUE	TRUE
A0A0A0MQR4;I3L2J0;Q96RK0	TRUE	TRUE	TRUE
A0A0A0MQS1;Q53H96;Q53H96-2	TRUE	TRUE	TRUE
A0A0A0MQS9;A0A0A0MTC7;Q16363;Q16363-2	TRUE	TRUE	TRUE
A0A0A0MQT0;P09455	TRUE	TRUE	TRUE
A0A0A0MQU0;Q9BV38;U3KQC1	TRUE	TRUE	TRUE
A0A0A0MQU4;Q96I15	TRUE	TRUE	TRUE
A0A0A0MQU7;A0A0A0MTK8;F5H0K0;P20823;P20823-2;P20823-3;P20823-7;U3KQS6	TRUE	TRUE	TRUE
A0A0A0MQV6;P09038;P09038-1;P09038-2;P09038-3	TRUE	TRUE	TRUE
A0A0A0MQV8	FALSE	TRUE	FALSE
A0A0A0MQX1;D6RGD1;Q9HD67	TRUE	TRUE	TRUE
A0A0A0MQX8;C9JP00;Q9NR56;Q9NR56-2;Q9NR56-5;Q9NR56-6;Q9NR56-7	TRUE	TRUE	TRUE
A0A0A0MQY7;A0A3B3ISH2;Q5VU97	TRUE	TRUE	TRUE
A0A0A0MQZ4;Q8N3J5;V9GY69	FALSE	FALSE	TRUE
A0A0A0MR02;P45880;P45880-1;P45880-2	TRUE	TRUE	TRUE
A0A0A0MR03;A0A0J9YWB6;A0A0J9YWJ4;K7EJD2;Q9Y5B0;Q9Y5B0-4	TRUE	TRUE	TRUE
A0A0A0MR05;H3BM50;H3BN58;H3BPT1;H3BPU5;Q9BVC4;Q9BVC4-4;Q9BVC4-5	TRUE	TRUE	TRUE
A0A0A0MR07;F5H5P4;P15498;P15498-2;Q96D37	TRUE	TRUE	TRUE
A0A0A0MR09;P43378	TRUE	TRUE	TRUE
A0A0A0MR11;A0A0A0MRS1;Q06730;Q06730-2;Q06730-3	TRUE	TRUE	TRUE
A0A0A0MR25;A0A5S6RJB7;D2CGD1;E7EVR7;H7BXU9;H7C265;P21802;P21802-15;P21802-16;P21802-17;P21802-18;P21802-2;P21802-20;P21802-21;P21802-22;P21802-23;P21802-3;P21802-4;P21802-5;P21802-6;P21802-8;S4R381	TRUE	TRUE	TRUE
A0A0A0MR36;Q9ULV0-2	TRUE	TRUE	TRUE
A0A0A0MR51;H7C2V0;O60427	TRUE	TRUE	TRUE
A0A0A0MR67;A0A0A0MSA1;E9PDI6;F5GY28;F5H522;Q13936;Q13936-10;Q13936-11;Q13936-12;Q13936-13;Q13936-14;Q13936-15;Q13936-16;Q13936-17;Q13936-18;Q13936-19;Q13936-2;Q13936-20;Q13936-21;Q13936-22;Q13936-23;Q13936-24;Q13936-25;Q13936-26;Q13936-27;Q13936-28;Q13936-29;Q13936-3;Q13936-30;Q13936-31;Q13936-32;Q13936-33;Q13936-34;Q13936-35;Q13936-36;Q13936-37;Q13936-4;Q13936-5;Q13936-6;Q13936-7;Q13936-8;Q13936…	TRUE	TRUE	TRUE
A0A0A0MR74;O75907	TRUE	TRUE	TRUE
A0A0A0MR93;A0A0C4DH11;K7ELZ7;K7ES91;Q53F39;Q53F39-2;Q53F39-3	FALSE	TRUE	TRUE
A0A0A0MRA5;B7Z4B8;M0R3F1;Q9BUJ2;Q9BUJ2-2;Q9BUJ2-4	TRUE	TRUE	TRUE
A0A0A0MRA8;A8K968;Q9Y2J2;Q9Y2J2-2	TRUE	TRUE	TRUE
A0A0A0MRB5;Q8WXG6;Q8WXG6-2;Q8WXG6-3;Q8WXG6-4;Q8WXG6-5;Q8WXG6-6;Q8WXG6-7;Q8WXG6-8	TRUE	TRUE	TRUE
A0A0A0MRD0;A0A2R8YCE3;F5H4B4;F5H4B4-2	TRUE	TRUE	TRUE
A0A0A0MRE5;Q9ULH1;Q9ULH1-2	TRUE	TRUE	TRUE
A0A0A0MRF6;Q99996;Q99996-1;Q99996-3;Q99996-5;Q99996-6	TRUE	TRUE	TRUE
A0A0A0MRF9;P16885	TRUE	TRUE	TRUE
A0A0A0MRG8;Q16611	TRUE	TRUE	TRUE
A0A0A0MRG9;B1AMJ5;Q5JTU8;Q96SN8;Q96SN8-2;Q96SN8-3;Q96SN8-4	FALSE	TRUE	FALSE
A0A0A0MRH3;Q9Y2W7;Q9Y2W7-2;Q9Y2W7-3	TRUE	TRUE	TRUE
A0A0A0MRI1;Q8IXQ4	TRUE	TRUE	TRUE
A0A0A0MRI2;Q9UNH7	TRUE	TRUE	TRUE
A0A0A0MRJ0;Q5VT25;Q5VT25-2;Q5VT25-3;Q5VT25-4;Q5VT25-5;Q5VT25-6	TRUE	TRUE	TRUE
A0A0A0MRJ6	TRUE	TRUE	TRUE
A0A0A0MRJ7;P12259	TRUE	TRUE	TRUE
A0A0A0MRJ8;Q7Z6I6;Q7Z6I6-3	FALSE	TRUE	FALSE
A0A0A0MRM2;Q86VF7;Q86VF7-2;Q86VF7-3;Q86VF7-4	TRUE	TRUE	TRUE
A0A0A0MRM9;Q14978;Q14978-2;Q14978-3	TRUE	TRUE	TRUE
A0A0A0MRP6;B7ZLQ5;P28370;P28370-2	TRUE	TRUE	TRUE
A0A0A0MRR1;Q5VV50;Q5VV51;Q5VV52;Q5VV52-3	FALSE	FALSE	TRUE
A0A0A0MRR7;P09234	TRUE	TRUE	TRUE
A0A0A0MRS8;Q9P2E2;Q9P2E2-3	FALSE	FALSE	TRUE
A0A0A0MRT2;Q9BTA9;Q9BTA9-2;Q9BTA9-5	TRUE	TRUE	TRUE
A0A0A0MRT6;Q8IZP0;Q8IZP0-2;Q8IZP0-3;Q8IZP0-4;Q8IZP0-5;Q8IZP0-6;Q8IZP0-9	TRUE	TRUE	TRUE
A0A0A0MRW6;Q9H6R4;Q9H6R4-2;Q9H6R4-4	TRUE	TRUE	TRUE
A0A0A0MRX1;A0A0R4J2E6;A0A494C0F8;A0A494C147;A0A494C1D9;B1APY9;P26378;P26378-1;P26378-2;P26378-3;P26378-4;P26378-5;Q12926;Q12926-2	TRUE	TRUE	TRUE
A0A0A0MRX8;A0A1B0GWI9;A0A1B0GWJ4;A0A2R8Y7V8;O00712;O00712-4;O00712-5;Q5VW26;Q5VW27;Q5VW30;U3KQE8	TRUE	TRUE	TRUE
A0A0A0MRY0;B0QYI1;Q8WUA7;Q8WUA7-2;Q8WUA7-3;Q8WUA7-4	TRUE	TRUE	TRUE
A0A0A0MRZ1;Q9H9P5-1;Q9H9P5-3	TRUE	TRUE	TRUE
A0A0A0MRZ4;E7EMV7;Q15025;Q15025-2;Q15025-3;Q15025-4;Q15025-5;Q15025-6;Q15025-7;Q15025-8	TRUE	TRUE	TRUE
A0A0A0MS14	TRUE	TRUE	FALSE
A0A0A0MS59;A0A0C4DFX4;Q6ZRS2;Q6ZRS2-2;Q6ZRS2-3	TRUE	TRUE	TRUE
A0A0A0MS79;O14513	TRUE	TRUE	TRUE
A0A0A0MS87	TRUE	TRUE	TRUE
A0A0A0MS98;P02730;P02730-2	FALSE	FALSE	TRUE
A0A0A0MS99;I3L4X2;P33527;P33527-2;P33527-3;P33527-5;P33527-9	TRUE	TRUE	TRUE
A0A0A0MSA9;A0A0C4DG49;P15151;P15151-2;P15151-3;P15151-4	TRUE	TRUE	TRUE
A0A0A0MSB4;Q6ZN50;Q969R2;Q969R2-2;Q969R2-3;Q969R2-6	TRUE	TRUE	TRUE
A0A0A0MSB8;Q9UPT5;Q9UPT5-1;Q9UPT5-2;Q9UPT5-5;Q9UPT5-6	TRUE	TRUE	TRUE
A0A0A0MSD0;Q4LDE5;Q4LDE5-3	FALSE	TRUE	TRUE
A0A0A0MSE3;D3DNG8;P30556	TRUE	TRUE	TRUE
A0A0A0MSG0;A6NGB9	TRUE	TRUE	TRUE
A0A0A0MSH9;A0A494C1F7;A0A494C1P7;Q86WJ1;Q86WJ1-2;Q86WJ1-4	TRUE	TRUE	TRUE
A0A0A0MSI2;B3KPJ4;Q8IXK0;Q8IXK0-2;Q8IXK0-3;Q8IXK0-4;Q8IXK0-5	TRUE	TRUE	TRUE
A0A0A0MSI6;B7Z1P2;Q9H4M3;Q9H4M3-2	TRUE	TRUE	TRUE
A0A0A0MSI8;O00471	TRUE	TRUE	TRUE
A0A0A0MSJ9;Q15283;Q15283-2	TRUE	TRUE	TRUE
A0A0A0MSK3;A0A0C4DH47;A0A498U6I9;C9JS68;P24557;P24557-2;P24557-3;P24557-4;Q53F23	TRUE	TRUE	TRUE
A0A0A0MSK6;Q13017;Q13017-2	TRUE	TRUE	TRUE
A0A0A0MSL1;Q8TDM6;Q8TDM6-2;Q8TDM6-3;Q8TDM6-4	TRUE	TRUE	TRUE
A0A0A0MSM0	TRUE	TRUE	TRUE
A0A0A0MSP4;Q86WC4	TRUE	TRUE	TRUE
A0A0A0MSQ0;P13797;P13797-2	TRUE	TRUE	TRUE
A0A0A0MSS0;P60880	TRUE	TRUE	TRUE
A0A0A0MSS7	FALSE	TRUE	TRUE
A0A0A0MSS8;P42330	TRUE	TRUE	TRUE
A0A0A0MST8;C9JRP1;E9PFN4;Q9Y6M7;Q9Y6M7-12;Q9Y6M7-13;Q9Y6M7-2;Q9Y6M7-6;Q9Y6M7-7;Q9Y6M7-8;Q9Y6M7-9	TRUE	TRUE	TRUE
A0A0A0MSU4;O94911-3	TRUE	TRUE	TRUE
A0A0A0MSV9;A0A0G2JH37;A0A0G2JKZ1;A2AB90;O15533;O15533-2;O15533-3	TRUE	TRUE	TRUE
A0A0A0MSW2;E9PEI2;Q9BQW3;Q9BQW3-1	TRUE	TRUE	FALSE
A0A0A0MSX9;P41252	TRUE	TRUE	TRUE
A0A0A0MSY7;O00142;O00142-4;O00142-6	TRUE	TRUE	TRUE
A0A0A0MSZ9;Q05048	TRUE	TRUE	TRUE
A0A0A0MT02;A2ABK4;P18615;P18615-3	TRUE	TRUE	TRUE
A0A0A0MT16;Q86UQ4;Q86UQ4-3;Q86UQ4-4	TRUE	TRUE	TRUE
A0A0A0MT32;P38571;P38571-2	TRUE	TRUE	TRUE
A0A0A0MT35;A0A2P0CTB1;Q8TBF2;Q8TBF2-3	TRUE	TRUE	TRUE
A0A0A0MT61;G5E979;H7BYM2;Q8WYN0;Q8WYN0-3;Q8WYN0-5	TRUE	TRUE	TRUE
A0A0A0MT72;C9JUH3;Q9BSQ5;Q9BSQ5-2;Q9BSQ5-3	TRUE	TRUE	TRUE
A0A0A0MT83;P26440	TRUE	TRUE	TRUE
A0A0A0MT93	TRUE	TRUE	TRUE
A0A0A0MTC2;D6RA37;D6RDV0;D6RIY7;Q13454;Q13454-2	TRUE	TRUE	TRUE
A0A0A0MTG5;P13232;P13232-2;Q5FBX5	TRUE	TRUE	TRUE
A0A0A0MTH2;A0A0A0MTK6	FALSE	TRUE	FALSE
A0A0A0MTH3	TRUE	TRUE	TRUE
A0A0A0MTH9;O14981	TRUE	TRUE	TRUE
A0A0A0MTJ9;Q6PIU2;Q6PIU2-2	TRUE	TRUE	TRUE
A0A0A0MTK0;A0A0A0MTP0;F5GWB1;Q7Z6B0;Q7Z6B0-2	TRUE	TRUE	TRUE
A0A0A0MTK4;A0A1B0GTZ1;Q8NB59;Q8NB59-2;Q8NB59-3;Q8NB59-5;Q8NB59-6;Q8NB59-7	FALSE	TRUE	TRUE
A0A0A0MTL6;Q6ZS17;Q6ZS17-2;Q6ZS17-3;Q6ZS17-4	TRUE	TRUE	TRUE
A0A0A0MTL7;A0A0D9SGH8;C6ZRJ6;C6ZRJ7;C6ZRK5;E2GH26;Q5JRY3;Q5JRY4;Q5JRY5;Q5VVR7;Q9NQB0;Q9NQB0-10;Q9NQB0-11;Q9NQB0-12;Q9NQB0-13;Q9NQB0-14;Q9NQB0-15;Q9NQB0-16;Q9NQB0-17;Q9NQB0-2;Q9NQB0-3;Q9NQB0-4;Q9NQB0-5;Q9NQB0-6;Q9NQB0-7;Q9NQB0-8;Q9NQB0-9	TRUE	TRUE	TRUE
A0A0A0MTN0;Q13617;Q13617-2	TRUE	TRUE	TRUE
A0A0A0MTN3	TRUE	TRUE	TRUE
A0A0A0MTP7;F8VXG7;Q99590;Q99590-2	TRUE	TRUE	TRUE
A0A0A0MTQ3;Q96N23;Q96N23-2	TRUE	TRUE	TRUE
A0A0A0MTQ8;P0C221	TRUE	TRUE	TRUE
A0A0A0MTR7;Q63HN8	TRUE	TRUE	TRUE
A0A0A0MTS7;Q8WZ42;Q8WZ42-12;Q8WZ42-13;Q8WZ42-2;Q8WZ42-8	TRUE	TRUE	TRUE
A0A0A0MTS9;K7EKZ0;K7EP24;K7ER94;Q2V2M9;Q2V2M9-2;Q2V2M9-3;Q2V2M9-4	TRUE	TRUE	TRUE
A0A0A0MTU3;Q4ZIN3;Q4ZIN3-2	TRUE	TRUE	TRUE
A0A0A6YYA0;Q86XR7-2;Q9Y3B3;Q9Y3B3-2	TRUE	TRUE	TRUE
A0A0A6YYC0;E9PJN1;O75676;O75676-2	TRUE	TRUE	TRUE
A0A0A6YYC7;Q96JP5;Q96JP5-2	TRUE	TRUE	TRUE
A0A0A6YYG9;F8WCF6;F8WDD7;P59998;P59998-2;P59998-3	TRUE	TRUE	TRUE
A0A0A6YYH1;Q7Z6K5;Q7Z6K5-2	TRUE	TRUE	TRUE
A0A0A6YYI3;A0A0B4J1V8;A8MV53;Q9NQ55;Q9NQ55-2;Q9NQ55-3	TRUE	TRUE	TRUE
A0A0A6YYL2;P0DMM9;P0DMM9-3;P0DMN0	TRUE	TRUE	TRUE
A0A0A6YYL4;P57737-3	TRUE	TRUE	TRUE
A0A0B4J1R2;Q9H6R3	TRUE	TRUE	TRUE
A0A0B4J1R4;P32754	TRUE	TRUE	TRUE
A0A0B4J1R7;Q96B45	TRUE	TRUE	TRUE
A0A0B4J1S8;Q9UBF8;Q9UBF8-2;Q9UBF8-3	TRUE	TRUE	TRUE
A0A0B4J1W0;B9TX62;F5GY88;H0YEG1;O75448;O75448-2	TRUE	TRUE	TRUE
A0A0B4J1Y2;Q8NDW8;Q8NDW8-3;Q8NDW8-5;Q8NDW8-6;Q8NDW8-7	TRUE	TRUE	TRUE
A0A0B4J1Z1;C9JAB2;Q16629;Q16629-2;Q16629-3;Q16629-4	TRUE	TRUE	TRUE
A0A0B4J221;E9PR99;Q96LU5	FALSE	TRUE	TRUE
A0A0B4J269	TRUE	TRUE	TRUE
A0A0B4J291;Q8N8U2	TRUE	TRUE	TRUE
A0A0B4J294;H3BP13;Q9UL33;Q9UL33-2	TRUE	TRUE	TRUE
A0A0B4J297;I3L4V0;Q9BRA0;Q9BRA0-2	TRUE	TRUE	TRUE
A0A0B4J2A0	TRUE	TRUE	TRUE
A0A0B4J2C2;F8WF49;Q9Y2H0;Q9Y2H0-1;Q9Y2H0-3	TRUE	TRUE	TRUE
A0A0B4J2C3;J3KPG2;P13693;Q5W0H4	TRUE	TRUE	TRUE
A0A0B4J2D5;P0DPI2	TRUE	TRUE	TRUE
A0A0B4J2E5;Q15269	TRUE	TRUE	TRUE
A0A0B4J2F0	TRUE	TRUE	TRUE
A0A0B4J2F8;E2QRJ6;F6S314;P52435	TRUE	TRUE	TRUE
A0A0B4J2G4;Q15345;Q15345-3	TRUE	TRUE	TRUE
A0A0C3SFZ9;M0QXD1;M0QY09;M0QZE1;M0QZI3;M0R1K4;M0R3E5;O14526;O14526-2;O14526-3	TRUE	TRUE	TRUE
A0A0C4DFL7;Q16850	TRUE	TRUE	TRUE
A0A0C4DFL8;F5GX28;O94953	TRUE	TRUE	TRUE
A0A0C4DFM1;Q92544	TRUE	TRUE	TRUE
A0A0C4DFM7;Q5TAX3	TRUE	TRUE	TRUE
A0A0C4DFP6;Q5T4F6;Q9NQ79;Q9NQ79-2;Q9NQ79-3	TRUE	TRUE	TRUE
A0A0C4DFP7;Q9BXJ1;Q9BXJ1-2	FALSE	TRUE	FALSE
A0A0C4DFR1;O75069;O75069-2;O75069-3;O75069-5	TRUE	TRUE	TRUE
A0A0C4DFU4;Q9HBG7-4	TRUE	TRUE	TRUE
A0A0C4DFV0;Q9H469	TRUE	TRUE	TRUE
A0A0C4DFW4;Q5JUR7	TRUE	TRUE	TRUE
A0A0C4DFX2;A0A286YFA9;A0A2R8Y5V8;A0A2R8YCY2;Q5TBA9	TRUE	TRUE	FALSE
A0A0C4DFX6;A0A0C4DGG6;Q9UHC9;Q9UHC9-2;Q9UHC9-3;Q9UHC9-4	TRUE	FALSE	FALSE
A0A0C4DFX9;Q9H3P2	TRUE	TRUE	TRUE
A0A0C4DFY5;A8MXZ4;J9JIE0;Q9NQ84;Q9NQ84-2	TRUE	TRUE	TRUE
A0A0C4DFY7;Q6UWW8;Q6UWW8-2	TRUE	TRUE	TRUE
A0A0C4DFZ2;P15289;P15289-2	TRUE	TRUE	TRUE
A0A0C4DG02;F8WE91;Q9Y6K1;Q9Y6K1-2	TRUE	TRUE	TRUE
A0A0C4DG17;C9J9K3;P08865	TRUE	TRUE	TRUE
A0A0C4DG21;A0A7D9NKC8;E7EP65;E7EW77;E9PEZ7;F8WAL6;Q9NYB9;Q9NYB9-2;Q9NYB9-4	TRUE	TRUE	FALSE
A0A0C4DG26;Q9NP71;Q9NP71-2;Q9NP71-3;Q9NP71-4;Q9NP71-6	TRUE	TRUE	TRUE
A0A0C4DG40;Q8NF91;Q8NF91-4	TRUE	TRUE	TRUE
A0A0C4DG51;Q9NP80;Q9NP80-3	TRUE	TRUE	TRUE
A0A0C4DG60;F8W7P9;Q9H903;Q9H903-1;Q9H903-3;Q9H903-5	FALSE	TRUE	TRUE
A0A0C4DG62;F5GYV5;F8WCT1;H7BZV4;Q66PJ3;Q66PJ3-2;Q66PJ3-3;Q66PJ3-4;Q66PJ3-7	TRUE	TRUE	TRUE
A0A0C4DG80;Q9P2N7;Q9P2N7-2;Q9P2N7-3;Q9P2N7-4;Q9P2N7-5	TRUE	TRUE	TRUE
A0A0C4DG85;P40394;P40394-2	TRUE	TRUE	TRUE
A0A0C4DG88;P14859;P14859-2;P14859-3;P14859-4;P14859-5;P14859-6	TRUE	TRUE	TRUE
A0A0C4DG89;Q7L014	TRUE	TRUE	TRUE
A0A0C4DG90;A4D0S4;A4D0S4-3	TRUE	TRUE	TRUE
A0A0C4DG91;A0A2R8Y7V2;C9J9V6;C9JQB1;O75414	TRUE	TRUE	TRUE
A0A0C4DG94	FALSE	TRUE	TRUE
A0A0C4DG95;C9IYJ2;E9PD56;F8WDF7;H7BYG4;Q7Z7A4;Q7Z7A4-2;Q7Z7A4-4;Q7Z7A4-6;W5RWE6	TRUE	TRUE	TRUE
A0A0C4DGA2;O75521;O75521-2	TRUE	TRUE	TRUE
A0A0C4DGA6;Q14527;Q14527-2	TRUE	TRUE	TRUE
A0A0C4DGA7;O94929;O94929-3	TRUE	TRUE	TRUE
A0A0C4DGB0;Q9UIL1;Q9UIL1-2;Q9UIL1-3	TRUE	TRUE	TRUE
A0A0C4DGB9	TRUE	TRUE	TRUE
A0A0C4DGE4;A0A0J9YW33;A0A286YF28;Q13277;Q13277-2;Q13277-3	TRUE	TRUE	TRUE
A0A0C4DGE6;A0A0G2JNY3;A0A0G2JRG8;E9PIR1;E9PNT2;Q6ZUM4;Q6ZUM4-2;Q6ZUM4-3	FALSE	FALSE	TRUE
A0A0C4DGE7;Q86UK5;Q86UK5-2;Q86UK5-3	TRUE	TRUE	TRUE
A0A0C4DGF7;Q6UXC1;Q6UXC1-2;Q6UXC1-3	TRUE	TRUE	TRUE
A0A0C4DGG1;Q9UKS6	TRUE	TRUE	TRUE
A0A0C4DGG9;A0A2R8Y212;A0A2R8Y425;A0A2R8Y521;A0A2R8Y5J0;A0A2R8YFK9;A0A2U3TZM0;F5GWX5;Q14839;Q14839-2	TRUE	TRUE	TRUE
A0A0C4DGH0;Q5ZPR3;Q5ZPR3-3;Q5ZPR3-4	TRUE	TRUE	TRUE
A0A0C4DGH6;A0JNW5	TRUE	TRUE	TRUE
A0A0C4DGI4	TRUE	TRUE	TRUE
A0A0C4DGM9;B7Z896;F5H3M2;Q9BVG8;Q9BVG8-2;Q9BVG8-4;Q9BVG8-5;Q9BVG8-6	TRUE	TRUE	TRUE
A0A0C4DGN6;J3QRU8;Q9Y2X7;Q9Y2X7-3	TRUE	TRUE	TRUE
A0A0C4DGP0;E7EU35;Q9UKF7-2	TRUE	TRUE	TRUE
A0A0C4DGQ4;Q86W25	TRUE	TRUE	TRUE
A0A0C4DGQ5;P04632	TRUE	TRUE	TRUE
A0A0C4DGQ8;Q6IAN0	TRUE	TRUE	TRUE
A0A0C4DGR2;M0QY25;M0QYH7;M0QYQ4;M0QZQ2;Q71SY5;Q71SY5-4;Q71SY5-5;Q71SY5-6;Q86YD1;Q86YD1-2	TRUE	TRUE	TRUE
A0A0C4DGR5	FALSE	TRUE	TRUE
A0A0C4DGS1;P39656;P39656-3	TRUE	TRUE	TRUE
A0A0C4DGV4;E9PLX3;O43504;R4GMU8	TRUE	TRUE	TRUE
A0A0C4DGZ4;Q9Y5U4	TRUE	TRUE	TRUE
A0A0C4DH01;Q9NVU0;Q9NVU0-2;Q9NVU0-3;Q9NVU0-4;Q9NVU0-5	TRUE	TRUE	TRUE
A0A0C4DH07;Q8N2S1;Q8N2S1-2;Q8N2S1-3	FALSE	TRUE	TRUE
A0A0C4DH13;E5RG96;J3KQJ9;Q8N2E2	TRUE	TRUE	TRUE
A0A0C4DH16;B8ZZS0;H7BXT7;Q9NYM9	TRUE	TRUE	TRUE
A0A0C4DH36	TRUE	TRUE	TRUE
A0A0C4DH65	FALSE	TRUE	FALSE
A0A0D2X7Z3;Q49AN0;Q49AN0-2	TRUE	TRUE	TRUE
A0A0D5XQ77;A0A0U5Q247;A0A140T8Z5;A0A140T981;A0A140T9R6;A0A140T9Y4;A0A140T9Z9;A0A140TA15;P01920;Q29967	FALSE	TRUE	TRUE
A0A0D9SEI0;Q9P0P8	TRUE	TRUE	TRUE
A0A0D9SEI3;A0A0D9SEN2;A0A0D9SER5;P21127;P21127-2;P21127-3;P21127-8	TRUE	TRUE	TRUE
A0A0D9SEJ5;F5GY05;Q96EK7;Q96EK7-2	TRUE	TRUE	TRUE
A0A0D9SEK1	TRUE	TRUE	TRUE
A0A0D9SEN7;A0A2R8Y7Z3;I3L0L0;Q13950;Q13950-2;Q13950-3	TRUE	TRUE	TRUE
A0A0D9SES8;H0YKN8;H0YKT5;H0YL70;H0YNI7;H0YNT2;Q04724;Q04726;Q04726-2;Q04726-3;Q04726-4;Q04726-5;Q04726-6;Q04726-7;Q04727;Q04727-2;Q04727-3;Q04727-4	TRUE	TRUE	TRUE
A0A0D9SET2;A0A0D9SFD0;A0A0D9SGI5;A0A0R4J2G5;A0A1B0GTW4;A0A1B0GV32;D6R942;D6RB91;D6RC63;D6RCM6;D6RG14;D6RG21;D6RJA7;D6RJG6;D8L7E9;H0YM62;Q02078;Q02078-2;Q02078-3;Q02078-4;Q02078-5;Q02078-6;Q05BX2;Q06413;Q06413-2;Q06413-3;Q06413-4;Q06413-5;Q06413-6;Q14814;Q14814-2;Q14814-3;Q14814-4;Q14814-5;Q14814-6	TRUE	TRUE	TRUE
A0A0D9SEU5;Q6VN20;Q6VN20-3;R4GMX8	TRUE	TRUE	TRUE
A0A0D9SEX5;Q9H6R6;Q9H6R6-2	TRUE	TRUE	TRUE
A0A0D9SEY1;E7EN19;E7ENQ1;G3XAA2;G5E948;H7C360;O95819;O95819-2;O95819-3;O95819-4;O95819-5;O95819-6	TRUE	TRUE	TRUE
A0A0D9SF07	FALSE	TRUE	TRUE
A0A0D9SF44;A0A0R4J2E2;Q9Y3T6;Q9Y3T6-3	TRUE	TRUE	TRUE
A0A0D9SF53;A0A0D9SFB3;A0A0D9SG12;A0A2R8Y4A4;A0A2R8Y645;A0A2R8YCW1;A0A2R8YF78;A0A2R8YFR4;A0A2R8YFS5;A0A2U3TZJ9;O00571	TRUE	TRUE	TRUE
A0A0D9SF60;Q99569;Q99569-2	TRUE	TRUE	TRUE
A0A0D9SF63;Q9BZK7	TRUE	TRUE	TRUE
A0A0D9SFB1	TRUE	TRUE	TRUE
A0A0D9SFB5;P08319;P08319-2	TRUE	TRUE	TRUE
A0A0D9SFE1;Q9H936	TRUE	TRUE	TRUE
A0A0D9SFG6;O43739;O43739-2;Q15438;Q15438-2;Q15438-3;Q99418;Q99418-2	TRUE	TRUE	TRUE
A0A0D9SFJ2;A0A1B0GWF1;A0A2R8Y5Y4;A0A2R8Y6P1;Q6ZU35	TRUE	TRUE	TRUE
A0A0D9SFK2;Q92614;Q92614-3;Q92614-4	TRUE	TRUE	TRUE
A0A0D9SFM0;Q149N8;Q149N8-4	FALSE	TRUE	TRUE
A0A0D9SFR6;Q16760;Q16760-2;Q86XP1;Q86XP1-2;Q86XP1-3;Q86XP1-5	TRUE	TRUE	TRUE
A0A0D9SFT8	TRUE	TRUE	TRUE
A0A0D9SG52;Q6ZWI9	FALSE	TRUE	TRUE
A0A0D9SG71;P49459;P49459-3	TRUE	TRUE	TRUE
A0A0D9SG72;A0A1B0GTP9;A0A1B0GVQ5;A0A1B0GWF2;A0A2R8Y5D4;P61764;P61764-2	TRUE	TRUE	TRUE
A0A0D9SG79;Q9NZ09;Q9NZ09-3;Q9NZ09-4	TRUE	TRUE	TRUE
A0A0D9SG96;Q9ULB1-3	TRUE	TRUE	TRUE
A0A0D9SGD6;B0QZE2;B7Z2J6;E7ENI9;E7EV75;Q15326;Q15326-2;Q15326-5	TRUE	TRUE	TRUE
A0A0D9SGE8;Q5JRC6;Q8IWS0;Q8IWS0-2;Q8IWS0-3;Q8IWS0-4;Q8IWS0-5	FALSE	TRUE	TRUE
A0A0D9SGF6;Q13813;Q13813-2	TRUE	TRUE	TRUE
A0A0D9SGH0;A0A1B0GV11;Q92581;Q92581-2;Q92581-3	TRUE	TRUE	TRUE
A0A0D9SGJ6;C9JFZ1;J3KPK1;J3KQV8;O43426;O43426-2;O43426-4	TRUE	TRUE	TRUE
A0A0G2JH30;A0A0G2JPX0;A0A2R8YFP9;A6NK88;P49918;P49918-2	TRUE	TRUE	TRUE
A0A0G2JH50;A0A0G2JIF0;A0A1W2PS56;A2BF26;Q5RIP0	FALSE	TRUE	TRUE
A0A0G2JH68;O60610	TRUE	TRUE	TRUE
A0A0G2JHC2;Q6NYC8	TRUE	TRUE	TRUE
A0A0G2JHJ2;Q92759;Q92759-2	FALSE	FALSE	TRUE
A0A0G2JHL0;A0A0G2JK44;A0A140T9E9;A0A140T9F7;A0A140T9V2;H0Y6K2;P25440;P25440-2;P25440-3;U3KQA6	TRUE	TRUE	TRUE
A0A0G2JI43;A0A0G2JIJ2;A0A140T926;A0A140T9C9;A0A140T9I2;A0A140T9R0;A0A140T9R2;A0A140T9T8;A0A140T9U6;F6UB75;P28068	TRUE	TRUE	TRUE
A0A0G2JIR1;A0A0G2JIS2;A0A0G2JK64;A0A0G2JRN8;A0A0G2JRR0;A2ABF8;A2ABF9;Q96KQ7;Q96KQ7-2	TRUE	TRUE	TRUE
A0A0G2JIW1;P0DMV8;P0DMV9	TRUE	TRUE	TRUE
A0A0G2JJD3;O95870	TRUE	TRUE	TRUE
A0A0G2JJP1;Q9C019	TRUE	TRUE	TRUE
A0A0G2JL52;A0A140T8Y0;A0A140TA35;B4E0K6;Q5ST30;Q5ST30-4	TRUE	TRUE	TRUE
A0A0G2JLC7	FALSE	TRUE	TRUE
A0A0G2JLK7	TRUE	TRUE	TRUE
A0A0G2JLQ8;A0A0G2JLX3;A0A0G2JNC8;A0A0G2JP37;A0A0G2JPB6;A0A0G2JPQ2;F5H5B1;F5H7Q5;J3KN39;K7EJ90;K7ELX1;Q9NX02;Q9NX02-2;Q9NX02-3;Q9NX02-4	TRUE	TRUE	TRUE
A0A0G2JM39;A0A0G2JN91;A0A0G2JNH1;M0QYD1	TRUE	TRUE	TRUE
A0A0G2JM63;A0A0G2JNK3;A0A0G2JPH3;Q8WX94-2;Q8WX94-3	TRUE	TRUE	TRUE
A0A0G2JM70;Q9NV79;Q9NV79-2;Q9NV79-3;V9GZ41	TRUE	TRUE	TRUE
A0A0G2JMD2;A0A2R9YJI8	TRUE	TRUE	TRUE
A0A0G2JMW3;A0A0G2JP44;Q9HBB8;Q9HBB8-2;Q9HBB8-4	TRUE	TRUE	TRUE
A0A0G2JMX7;A0A0G2JPD5;A0A0G2JQJ7;A0A0G2JS76;P10636;P10636-6;P10636-7;P10636-8;P10636-9	TRUE	TRUE	TRUE
A0A0G2JMZ6;O60282	TRUE	TRUE	TRUE
A0A0G2JMZ8;Q16625	TRUE	TRUE	TRUE
A0A0G2JN23;A0A0G2JQ38	TRUE	TRUE	TRUE
A0A0G2JN42;A0A0G2JNJ8;Q6W4X9	TRUE	TRUE	TRUE
A0A0G2JN53	TRUE	TRUE	TRUE
A0A0G2JN84;P59817	TRUE	TRUE	TRUE
A0A0G2JNW7;Q9Y666	TRUE	TRUE	TRUE
A0A0G2JNZ2;A0A669KB89;Q14160	TRUE	TRUE	TRUE
A0A0G2JPC8;B4DTC2;E7EPX8;E7ER82;Q8TC27	TRUE	TRUE	TRUE
A0A0G2JPQ3;P17693;P17693-5;Q5RJ85;Q8MH48	FALSE	TRUE	TRUE
A0A0G2JPZ6;A0A0J9YWU2;Q9H3Q3	TRUE	TRUE	TRUE
A0A0G2JQ41;A0A1C7CYZ0;B7Z683;Q12979;Q12979-2;Q12979-4	TRUE	TRUE	FALSE
A0A0G2JQC6;A0A0G2JQK9;A0A0G2JRT1;E7EWN1;Q99102-3	TRUE	TRUE	TRUE
A0A0G2JQT1;A0A0G2JR96	TRUE	FALSE	TRUE
A0A0G2JRG1	TRUE	TRUE	TRUE
A0A0G2JS52;Q01538;Q01538-2	TRUE	TRUE	TRUE
A0A0J9YVP6;Q9UHX1-2	TRUE	TRUE	TRUE
A0A0J9YVW4	TRUE	TRUE	TRUE
A0A0J9YW18;F6RP06;Q12983	TRUE	TRUE	TRUE
A0A0J9YW36;A0A0J9YXY4;Q9NZ72;Q9NZ72-2	FALSE	FALSE	TRUE
A0A0J9YW63	TRUE	TRUE	TRUE
A0A0J9YW64;A6NIW2;Q5JSL3	TRUE	TRUE	FALSE
A0A0J9YWD2;A0A0J9YX19;A0A0J9YXY6;A0A0J9YYK8;A0A1B0GTJ5;A0A1B0GU79;A0A1B0GUR8;A0A1B0GVR1;Q9UBY8	TRUE	TRUE	TRUE
A0A0J9YWD5;A0A0J9YX88;A0A0J9YYB5;B7ZM65;E9PJ24;F8WEF5;Q9P1Y6;Q9P1Y6-2;Q9P1Y6-3	TRUE	TRUE	TRUE
A0A0J9YWD6;O75398-5	TRUE	FALSE	FALSE
A0A0J9YWE1;A0A0J9YWN0	TRUE	TRUE	TRUE
A0A0J9YWL0;Q9Y4K1	TRUE	TRUE	TRUE
A0A0J9YWR7;A0A0J9YXE4;Q8N2F6;Q8N2F6-2;Q8N2F6-3;Q8N2F6-4	TRUE	TRUE	TRUE
A0A0J9YWV4;O75154;O75154-2;O75154-3;X6RFI8	TRUE	TRUE	TRUE
A0A0J9YX34;A0A6Q8PEY7;A0A6Q8PF18;A0A6Q8PF63;A0A6Q8PF74;A0A6Q8PFB0;A0A6Q8PFI4;A0A6Q8PFM2;A0A6Q8PFS5;A0A6Q8PFV0;A0A6Q8PFX3;A0A6Q8PG16;A0A6Q8PGE9;A0A6Q8PGG4;A0A6Q8PGL5;A0A6Q8PH06;A0A6Q8PHE9;A0A6Q8PHG4;A0A6Q8PHP4;A0A6Q8PHR6;C9J084;Q9C040;Q9C040-2	TRUE	TRUE	TRUE
A0A0J9YX62;C9J2C4;O75190;O75190-2;O75190-3	TRUE	TRUE	TRUE
A0A0J9YX66;A0A0J9YXJ0;A0A1B0GU44;A0A1B0GUN8;E9PC62;O95319;O95319-2;O95319-3;O95319-4;O95319-5;Q5VZZ6;V9GYD9	TRUE	TRUE	TRUE
A0A0J9YXF2;Q15165;Q15165-1	TRUE	TRUE	TRUE
A0A0J9YXM6;Q562E7	TRUE	TRUE	TRUE
A0A0J9YXN7	TRUE	TRUE	TRUE
A0A0J9YXT0;H7C5H6;Q9H0F7;Q9H0F7-2	TRUE	TRUE	TRUE
A0A0J9YY17;A0A1C7CYW8;A0A669KB38;Q8IVF4	TRUE	TRUE	TRUE
A0A0J9YY72;A0A1W2PQQ1;Q5HYW2	TRUE	TRUE	TRUE
A0A0J9YYF0	TRUE	TRUE	TRUE
A0A0J9YYF7;Q86T65;Q86T65-4	TRUE	TRUE	TRUE
A0A0K0K1A5	TRUE	TRUE	TRUE
A0A0R4J2E8;D6REM6;P43243	TRUE	TRUE	TRUE
A0A0R4J2F3;P0DPB6	TRUE	TRUE	TRUE
A0A0R4J2F6;Q12894;Q12894-2	TRUE	TRUE	TRUE
A0A0S2Z4L3;A0A3B3ISJ1;G5E9F8;P07225	TRUE	TRUE	TRUE
A0A0S2Z4L7;O60603	TRUE	TRUE	TRUE
A0A0S2Z4Q7;A0A1W2PQQ6;A0A1W2PQR0;A0A1W2PR45;A0A1W2PRC6;A0A1W2PRD9;A0A1W2PRY1;A0A1X7SBT2;C9JYS9;Q9UNP4;Q9UNP4-2;Q9UNP4-3	TRUE	TRUE	TRUE
A0A0S2Z5D0;A0A1B0GTU6;H3BUV4;Q9NWW5;Q9NWW5-2	TRUE	TRUE	TRUE
A0A0U1RQC7	FALSE	TRUE	TRUE
A0A0U1RQE4;A0A494C1M0;Q5HYK7;Q5HYK7-2;Q5HYK7-3	TRUE	TRUE	TRUE
A0A0U1RQK7	TRUE	TRUE	TRUE
A0A0U1RQK9	TRUE	TRUE	TRUE
A0A0U1RQM0;H0YKX3;H0YMA4;Q15004	TRUE	TRUE	FALSE
A0A0U1RQQ9;Q6P3W7	TRUE	TRUE	TRUE
A0A0U1RQS4;A0A0U1RR93;Q9BYB0;Q9BYB0-3	TRUE	TRUE	TRUE
A0A0U1RQT8;Q8TCZ2;Q8TCZ2-2;Q8TCZ2-3;Q8TCZ2-5	TRUE	TRUE	TRUE
A0A0U1RQW3;Q8WXE1;Q8WXE1-2	TRUE	FALSE	TRUE
A0A0U1RQW6;E7EPU2;Q9Y2E4	TRUE	TRUE	TRUE
A0A0U1RQY4	TRUE	TRUE	TRUE
A0A0U1RR06;Q9Y484;Q9Y484-2;Q9Y484-3	TRUE	TRUE	TRUE
A0A0U1RR16;A0A3B3IRZ7;Q8NEY4;Q8NEY4-2	TRUE	TRUE	TRUE
A0A0U1RR25	TRUE	TRUE	TRUE
A0A0U1RR27;H3BTW5;Q7Z401;Q7Z401-2	TRUE	TRUE	TRUE
A0A0U1RR32;A0A0U1RRH7;P0C0S8;P20671;Q96KK5;Q99878;Q9BTM1	TRUE	TRUE	TRUE
A0A0U1RR76;A6NJ78;A6NJ78-2;A6NJ78-4;P0C7V9	TRUE	TRUE	TRUE
A0A0U1RRA6;B5MCG9;B5MCU0;H7C0E9;Q9Y2K5	TRUE	TRUE	TRUE
A0A0U1RRB6;J3QT38;Q9Y2D4;Q9Y2D4-2	TRUE	TRUE	TRUE
A0A0U1RRB9;F2Z2V1;Q96C11;Q96C11-3	TRUE	TRUE	TRUE
A0A0U1RRK1;A0A286YF11;F6XEV2;Q9BPX6;Q9BPX6-3	TRUE	TRUE	TRUE
A0A0U1RRL7	TRUE	TRUE	TRUE
A0A0U1RRL8;Q8TB22;Q8TB22-2;Q8TB22-3	TRUE	TRUE	TRUE
A0A0U1RRM1;Q8WXI9	FALSE	TRUE	TRUE
A0A126GWB3;P47888	TRUE	TRUE	TRUE
A0A126GWF9;A0A2C9F2Y1;B2RN74;Q8NG94;Q8NH07;Q8NH93	FALSE	FALSE	TRUE
A0A140LJL2;Q8N350	TRUE	TRUE	TRUE
A0A140T8Y3;A0A140T902;A0A140T9C0;A0A140TA33;A0A140TA41;A0A140TA52;A0A3B3ISX9;P22105;P22105-1;P22105-4	TRUE	TRUE	TRUE
A0A140T913;A0A140T933;A0A140T955;A0A140T9I0;A0A140T9X5;A0A1W2PRT9;Q53Z42	TRUE	TRUE	TRUE
A0A140T951	TRUE	TRUE	TRUE
A0A140T962;A0A140T9B3;A0A140T9J9;A0A1W2PR11;Q5QT33	TRUE	TRUE	TRUE
A0A140T9B9;A0A140T9N6;A0A140T9V9;H0Y551;P14373	FALSE	TRUE	FALSE
A0A140T9G8;Q0P5T2;Q5SQH8;Q5SQH8-2;Q5SQH8-4	TRUE	TRUE	TRUE
A0A140T9T7;Q03518	TRUE	TRUE	TRUE
A0A140TA01;E9PQT8;E9PQZ5;O43189;O43189-2	TRUE	TRUE	TRUE
A0A140TA09;Q99942	TRUE	TRUE	TRUE
A0A140TA86;Q5XKP0	FALSE	TRUE	TRUE
A0A140VK87;H0Y7R1;Q8TBZ2	FALSE	TRUE	FALSE
A0A182DWF2;A0A182DWF3;Q9NNW7;Q9NNW7-2	TRUE	TRUE	TRUE
A0A182DWH7;P49908	TRUE	TRUE	TRUE
A0A182DWI4;E9PN30;Q9BQE4	TRUE	TRUE	TRUE
A0A1B0GTB0;A0A1B0GTU8;A0A1B0GU12;A0A1B0GUT7;A0A1B0GVB9;A0A1B0GVC7;A0A1B0GVW0;A0A1B0GWJ8;A0A1C7CYW4;B7Z413;H7C3E1;O75787;O75787-2	TRUE	TRUE	TRUE
A0A1B0GTF3;A0A6I8PIT5;A0A6I8PIW1;A0A6I8PLB1;O43301	TRUE	TRUE	TRUE
A0A1B0GTG2;A0A1B0GW77;P49419;P49419-2	TRUE	TRUE	TRUE
A0A1B0GTH8;A0A1B0GUV4	FALSE	TRUE	TRUE
A0A1B0GTJ7;A0A1B0GWJ0;P30566	TRUE	TRUE	TRUE
A0A1B0GTJ8;A0A1B0GV63;A0A1B0GVK1;A0A1B0GWJ2;A0A3F2YNW7;A0A6Q8NVI4;H0Y7H8;Q8NFD5;Q8NFD5-2;Q8NFD5-3;Q8NFD5-4	TRUE	TRUE	TRUE
A0A1B0GTK6	TRUE	TRUE	TRUE
A0A1B0GTL7;A0A1W2PQ11;A0A1W2PQ86;A0A1W2PQJ4;Q02246	FALSE	TRUE	TRUE
A0A1B0GTM1;A0A1B0GUM5;E7ETX0;Q8NHX9	TRUE	TRUE	TRUE
A0A1B0GTM3;A0A1B0GUA4;A0A1B0GUH5;A0A1B0GW68;Q13510;Q13510-2	TRUE	TRUE	TRUE
A0A1B0GTT2	TRUE	TRUE	TRUE
A0A1B0GTU3;Q96L93;Q96L93-2;Q96L93-4;Q96L93-5;Q96L93-6	TRUE	TRUE	FALSE
A0A1B0GTU4	TRUE	TRUE	TRUE
A0A1B0GTU5;H0Y488;O14497;O14497-2;O14497-3	TRUE	TRUE	TRUE
A0A1B0GTU7;H0YD36;P54098	TRUE	TRUE	TRUE
A0A1B0GTV6	TRUE	TRUE	TRUE
A0A1B0GTW1;A0A2R8YDH4;A0A3B3ITE1;Q9UDY2;Q9UDY2-3;Q9UDY2-7	TRUE	TRUE	TRUE
A0A1B0GTX1;A0A1C7CYY6;Q6XZF7;Q6XZF7-2	TRUE	TRUE	TRUE
A0A1B0GU24;Q9HCJ0;Q9HCJ0-2	FALSE	TRUE	FALSE
A0A1B0GUA3;A0A6Q8PGG2;A0A6Q8PH45;A0A6Q8PHL8;Q96EK5	TRUE	TRUE	TRUE
A0A1B0GUC2;A0A1W2PP33;C9J7I0	TRUE	TRUE	TRUE
A0A1B0GUF4	TRUE	TRUE	TRUE
A0A1B0GUG6;Q86WH2	FALSE	TRUE	TRUE
A0A1B0GUG7;A0A1B0GWB7;A0A1B0GWI3;A0A1B0GWK3	TRUE	FALSE	FALSE
A0A1B0GUI1;Q6GYQ0;Q6GYQ0-2;Q6GYQ0-3;Q6GYQ0-4;Q6GYQ0-5;Q6GYQ0-6;Q6GYQ0-7	TRUE	FALSE	TRUE
A0A1B0GUL3	TRUE	TRUE	TRUE
A0A1B0GUL6;E9PEZ5;Q9UPP5;Q9UPP5-2	TRUE	TRUE	FALSE
A0A1B0GUN5	TRUE	TRUE	TRUE
A0A1B0GUN9	TRUE	TRUE	TRUE
A0A1B0GUS7	TRUE	TRUE	TRUE
A0A1B0GUZ2;P00797;P00797-2	TRUE	TRUE	TRUE
A0A1B0GUZ7;Q14156;Q14156-2	TRUE	TRUE	TRUE
A0A1B0GV26;Q8WWZ3;Q8WWZ3-2	FALSE	TRUE	TRUE
A0A1B0GV47;Q7Z4S6;Q7Z4S6-2;Q7Z4S6-4;Q7Z4S6-5;Q7Z4S6-6	TRUE	TRUE	TRUE
A0A1B0GV48;D6RBC4;Q8NAP3	TRUE	TRUE	FALSE
A0A1B0GV57;Q9NYJ8	FALSE	TRUE	TRUE
A0A1B0GV71;A0A1B0GW34;A0A1B0GWD3;B4DFF3;H3BNK7;H3BR00;O95086;Q13286;Q13286-2;Q13286-3;Q13286-4;Q13286-5;Q13286-7;Q2TA70;Q9UBD8	TRUE	TRUE	TRUE
A0A1B0GVD5;A0A1B0GVP3;A0A1B0GW44;A0A1B0GWE8;P07339	TRUE	TRUE	TRUE
A0A1B0GVG4	TRUE	TRUE	TRUE
A0A1B0GVI7;A0A2R8Y7G1;P35869	TRUE	TRUE	TRUE
A0A1B0GVL3;Q05086;Q05086-2;Q05086-3	TRUE	TRUE	TRUE
A0A1B0GVV3;Q5EBL4	TRUE	TRUE	TRUE
A0A1B0GVV8	TRUE	TRUE	TRUE
A0A1B0GW05	TRUE	TRUE	TRUE
A0A1B0GW23;Q03154	TRUE	TRUE	TRUE
A0A1B0GW38	TRUE	TRUE	TRUE
A0A1B0GW41;E9PEN0;Q8WYH8;Q8WYH8-2	TRUE	TRUE	TRUE
A0A1B0GWB2	TRUE	TRUE	TRUE
A0A1B0GWD8;Q9C093-4	TRUE	TRUE	TRUE
A0A1B0GWI2;O75503	TRUE	TRUE	TRUE
A0A1B0GXA9;C9JHJ7;Q04771	FALSE	TRUE	TRUE
A0A1B1UZQ1;A0A3B3IRU7;A0A3B3ISJ6;A0A3F2YP58;A0A5F9ZHF9;A0A5F9ZI67;Q9Y233;Q9Y233-2	FALSE	TRUE	TRUE
A0A1C7CYW7	FALSE	TRUE	TRUE
A0A1C7CYX0	TRUE	TRUE	TRUE
A0A1C7CYX8	FALSE	TRUE	TRUE
A0A1C7CYX9	TRUE	TRUE	TRUE
A0A1C7CYY4;I3L1K6;I3L532;P12829	FALSE	TRUE	TRUE
A0A1D5RMN4;P23945;P23945-2;P23945-4	TRUE	TRUE	TRUE
A0A1P0AYU5;Q9BWM7	TRUE	TRUE	TRUE
A0A1W2PNF0;A0A1W2PNY6;A0A1W2PPE6;A0A1W2PPG9;A0A1W2PPH4;A0A1W2PQ13;A0A1W2PQ60;A0A1W2PQD6;A0A1W2PQH2;A0A1W2PQL8;A0A1W2PR66;A0A1W2PRN3;A0A1W2PRT7;A0A1W2PS45;A0A1W2PS77;A0A1W2PSA9;A0A1W2PSD1;Q9Y2D2;Q9Y2D2-2;Q9Y2D2-3	TRUE	TRUE	TRUE
A0A1W2PNH8;A0A1W2PNQ8;A0A1W2PNR0;A0A1W2PNW5;A0A1W2PPB6;A0A1W2PPR7;A0A1W2PQA9;A0A1W2PQP4;A0A1W2PQZ1;A0A1W2PS19;K7ELE1;K7EPJ2;O95427	TRUE	TRUE	TRUE
A0A1W2PNP0;Q969N2;Q969N2-5	TRUE	TRUE	TRUE
A0A1W2PNR9;Q9Y5U9	TRUE	TRUE	TRUE
A0A1W2PNT1	TRUE	TRUE	TRUE
A0A1W2PNU4;A0A286YES2;F8VYC4;P0DJD0;P0DJD1	TRUE	TRUE	TRUE
A0A1W2PNV4	TRUE	TRUE	TRUE
A0A1W2PNW1;A0A494C0T4;H0YJH6;P42226;P42226-3	TRUE	TRUE	TRUE
A0A1W2PNX8;Q9H3U1;Q9H3U1-2	TRUE	TRUE	TRUE
A0A1W2PNY5;A0A1W2PPP6;A0A1W2PQA7;A0A1W2PQZ6;A0A1W2PR08;A0A1W2PRF0;A0A1W2PRF5;A0A1W2PRJ0;A0A1W2PS93;A0A1X7SBS0;G5E9D4;Q96EB1;Q96EB1-2;Q96EB1-3	TRUE	TRUE	TRUE
A0A1W2PNZ9;H7BXU7;Q15652;Q15652-3	TRUE	TRUE	FALSE
A0A1W2PP04;Q5JY83;Q9Y388	TRUE	TRUE	TRUE
A0A1W2PP11;Q9H300	TRUE	TRUE	TRUE
A0A1W2PPB5;Q13873;Q13873-2	TRUE	FALSE	TRUE
A0A1W2PPB7;E9PH70;H0Y8E4;Q9ULH0;Q9ULH0-2;Q9ULH0-4	TRUE	TRUE	TRUE
A0A1W2PPC6;Q9H3H5;Q9H3H5-2	TRUE	TRUE	TRUE
A0A1W2PPD8	TRUE	TRUE	TRUE
A0A1W2PPH1;P23368	TRUE	TRUE	TRUE
A0A1W2PPH6	TRUE	TRUE	TRUE
A0A1W2PPI5;Q5JSJ4	TRUE	TRUE	TRUE
A0A1W2PPJ5;J3QT51;J3QT87;Q96SW2;Q96SW2-2	TRUE	TRUE	TRUE
A0A1W2PPS1;Q00839;Q00839-2	TRUE	TRUE	TRUE
A0A1W2PPT3;P52740;P52740-2	FALSE	TRUE	TRUE
A0A1W2PPV0;A0A1W2PQG5;Q9Y5P2;Q9Y5P2-2	TRUE	TRUE	TRUE
A0A1W2PPZ5;P23193	TRUE	TRUE	TRUE
A0A1W2PQ75;O15488;O15488-2;O15488-3;O15488-4;O15488-6	TRUE	TRUE	TRUE
A0A1W2PQD2;Q9UBB4	TRUE	TRUE	TRUE
A0A1W2PQE7	TRUE	TRUE	TRUE
A0A1W2PQM2	TRUE	TRUE	TRUE
A0A1W2PQM3	TRUE	TRUE	TRUE
A0A1W2PQM5;A0A1W2PR19;A0A1W2PRG0	TRUE	TRUE	TRUE
A0A1W2PQN4	FALSE	TRUE	TRUE
A0A1W2PQP6;Q9BWL3;Q9BWL3-2;Q9BWL3-3;Q9BWL3-4;Q9BWL3-5;X6R6F3;X6R6S3	TRUE	TRUE	TRUE
A0A1W2PQQ5	TRUE	TRUE	TRUE
A0A1W2PQS6	TRUE	TRUE	TRUE
A0A1W2PR09;A0A1W2PRL5;A0A1W2PRM0;F5GYH1;Q8NC96	TRUE	TRUE	TRUE
A0A1W2PR17;F2Z2I2;Q16875;Q16875-2;Q16875-3;Q16875-4;Q5VX20;Q5W015	TRUE	TRUE	TRUE
A0A1W2PR28;A0A1W2PRJ5;A0A6Q8PFR7;Q5JU85;Q5JU85-3	TRUE	TRUE	TRUE
A0A1W2PR41;Q9Y6Q6;Q9Y6Q6-2;Q9Y6Q6-3;Q9Y6Q6-4;Q9Y6Q6-5	FALSE	TRUE	TRUE
A0A1W2PR46;A0A1X7SBR3;P14136;P14136-2;P14136-3	TRUE	TRUE	TRUE
A0A1W2PRB8	TRUE	TRUE	TRUE
A0A1W2PRI9;E9PNW5	TRUE	TRUE	TRUE
A0A1W2PRV5;E7EQZ4;Q16637;Q16637-2;Q16637-3;Q16637-4	FALSE	TRUE	TRUE
A0A1W2PRW4;P53816	TRUE	TRUE	TRUE
A0A1W2PS02	FALSE	FALSE	TRUE
A0A1W2PS05;Q8NEB9	TRUE	TRUE	TRUE
A0A1W2PS43;Q14108	TRUE	TRUE	TRUE
A0A1W2PS52	TRUE	TRUE	TRUE
A0A1W2PS94;A0A2R8Y358;Q9BXT5	TRUE	TRUE	FALSE
A0A1X7SBT1;Q9H1D0;Q9H1D0-2	TRUE	TRUE	TRUE
A0A1X7SBT7;O95502	FALSE	TRUE	TRUE
A0A1X7SBY3;H0Y860;Q9P246;Q9P246-2	TRUE	TRUE	TRUE
A0A1X7SBZ2;A0A5H1ZRQ2;Q92841	TRUE	TRUE	TRUE
A0A1Y0BRN3;A0A590UJ40	TRUE	TRUE	TRUE
A0A286YEV4;A0A286YEV9;A0A286YEW8;A0A286YEX1;A0A286YF00;A0A286YF45;A0A286YF51;A0A286YF73;A0A286YFC6;A0A286YFE7;A0A286YFF5;A0A286YFH9;A0A286YFM2;B7Z2B2;E7ERQ4;Q8NHS3	TRUE	TRUE	TRUE
A0A286YEX4;P08651;P08651-5;P08651-6	TRUE	TRUE	TRUE
A0A286YF17;A0A286YFD0;P42898;P42898-2;Q5SNW7	TRUE	TRUE	TRUE
A0A286YF22;O43175	TRUE	TRUE	TRUE
A0A286YF37;Q9UK22	TRUE	TRUE	TRUE
A0A286YF93	FALSE	TRUE	TRUE
A0A286YFA5;Q8NGQ1	TRUE	TRUE	TRUE
A0A286YFE3;A0A286YFF7;A0A286YFL8;A0A2C9F2P4;P50897;Q5T0S4	TRUE	TRUE	TRUE
A0A286YFF8;Q7Z3U7;Q7Z3U7-2;Q7Z3U7-5;Q7Z3U7-6	TRUE	TRUE	TRUE
A0A2Q2TTZ9;P01593;P01594	TRUE	TRUE	TRUE
A0A2Q3DQE3;Q13555;Q13555-10;Q13555-11;Q13555-2;Q13555-3;Q13555-4;Q13555-5;Q13555-6;Q13555-7;Q13555-8;Q13555-9;Q5SWX3;Q8WU40	TRUE	TRUE	TRUE
A0A2R8Y2A8	TRUE	TRUE	TRUE
A0A2R8Y2F6;P42336	TRUE	TRUE	TRUE
A0A2R8Y3M9	TRUE	TRUE	TRUE
A0A2R8Y3N3;A0A2R8Y5P7;A0A2R8Y6I1;P49590;P49590-2	TRUE	TRUE	TRUE
A0A2R8Y3S0;A0A2R8Y511;A0A2R8YCL0;Q96JX3	TRUE	TRUE	TRUE
A0A2R8Y440;A0A2R8Y4P4;A0A2R8Y7S2;A0A2R8YG32;A0A2R8YGG3;P51532;P51532-2;P51532-3;P51532-4;P51532-5;Q9HBD4	TRUE	TRUE	TRUE
A0A2R8Y455;A0A2R8Y600;A0A2R8Y620;A0A2R8Y7U2;Q86VX2;Q86VX2-2	TRUE	TRUE	TRUE
A0A2R8Y471;Q12967;Q12967-2;Q12967-3;Q12967-4;Q12967-5;Q12967-6;Q5T7U6	TRUE	TRUE	TRUE
A0A2R8Y478;A6NNI4;G8JLH6;P21926	TRUE	TRUE	TRUE
A0A2R8Y484;Q08722;Q08722-2;Q08722-3;Q08722-4	TRUE	TRUE	TRUE
A0A2R8Y491;E7EWD9;O95718;O95718-1;O95718-2	TRUE	TRUE	TRUE
A0A2R8Y4C2;A0A2R8Y596;A0A2R8Y5C9;A0A2R8Y5E4;A0A2R8Y6M6;A0A2R8Y8C4;A0A2R8YFK2;A0A2R8YFS8;P56945;P56945-2;P56945-3;P56945-4;P56945-5;P56945-6;P56945-7;P56945-8	TRUE	TRUE	TRUE
A0A2R8Y4F5	TRUE	TRUE	TRUE
A0A2R8Y4I8;A0A2R8Y7K2;A0A2U3TZR0;Q9UBP0;Q9UBP0-2;Q9UBP0-3;Q9UBP0-4	TRUE	TRUE	TRUE
A0A2R8Y4K2;Q9Y2S2	TRUE	TRUE	TRUE
A0A2R8Y4M1;A0A2R8Y615;A0A2R8YGW2;A0A5F9ZHK1;Q9NZA1;Q9NZA1-2;Q9NZA1-3	TRUE	TRUE	TRUE
A0A2R8Y4T1	TRUE	TRUE	TRUE
A0A2R8Y4U1;A0A2R8YDF7;O75164	TRUE	TRUE	TRUE
A0A2R8Y4U4	TRUE	TRUE	TRUE
A0A2R8Y4V0;A0A2R8Y4Z4;A0A2R8Y5D8;A0A2R8Y6Q0;A0A2R8YDG0;Q09428;Q09428-2	TRUE	TRUE	TRUE
A0A2R8Y4W0	TRUE	TRUE	TRUE
A0A2R8Y4W1;A0A2R8Y860;A0A2R8YD46;A0A2R8YFE3;A0A2U3TZS7;P43004;P43004-2	TRUE	TRUE	TRUE
A0A2R8Y4W2;A0A2R8YE63;Q12929	TRUE	TRUE	TRUE
A0A2R8Y4Y7;A0A2R8YFW4;Q9UQ90	TRUE	TRUE	TRUE
A0A2R8Y4Z0;A0A2R8Y7W5;A0A2R8YF61;Q14004;Q14004-2	TRUE	TRUE	TRUE
A0A2R8Y4Z6;J3KMZ7;Q9H0H0	FALSE	TRUE	TRUE
A0A2R8Y4Z8	TRUE	TRUE	TRUE
A0A2R8Y500;A0A2R8YFP1;A0A2U3TZI0;Q9BZR9;R4GN03	FALSE	FALSE	TRUE
A0A2R8Y524;A0A2R8YEC9;E9PFW2;O00462	TRUE	TRUE	TRUE
A0A2R8Y543;A0A2R8Y5A3;A0A2R8Y804;A0A2R8YCH5;B4DGU4;P35222	TRUE	TRUE	TRUE
A0A2R8Y544;Q9BR61	TRUE	TRUE	TRUE
A0A2R8Y549;Q8NI35;Q8NI35-2;Q8NI35-3;Q8NI35-4	TRUE	TRUE	TRUE
A0A2R8Y566;Q9P260-2	TRUE	TRUE	TRUE
A0A2R8Y595;A0A2R8YFL0;P49711	TRUE	TRUE	TRUE
A0A2R8Y5A0;A0A2R8YD58;E7EU96;P68400	TRUE	TRUE	TRUE
A0A2R8Y5D3;A0A2R8YEZ4;O15160;O15160-2	TRUE	TRUE	TRUE
A0A2R8Y5F1;A0A2R8Y7C8;A0A2R8Y7X5;A0A2R8YDR3;A0A2R8YDZ2;A0A2R8YGD6;A0A2R8YGU4;H3BMQ0;P49815;P49815-2;P49815-3;P49815-4;P49815-5;P49815-6;P49815-7;X5D2U8	TRUE	TRUE	TRUE
A0A2R8Y5J4;Q9BYG8	TRUE	TRUE	TRUE
A0A2R8Y5K2;Q96LT7	TRUE	TRUE	TRUE
A0A2R8Y5N2;A0A2R8Y5S3;A0A2R8YFV7;Q92574;Q92574-2	TRUE	TRUE	TRUE
A0A2R8Y5P9;Q8TF72	TRUE	TRUE	TRUE
A0A2R8Y5Q1;A0A2R8Y7P3;A0A590UJ80;F5GWL1;F5H0I3;F5H876;G3V0H1;I3L0A5;P35711;P35711-2;P35711-4;P35711-5	FALSE	FALSE	TRUE
A0A2R8Y5Q8;A0A2R8YHI9;Q15813;Q15813-2	TRUE	TRUE	TRUE
A0A2R8Y5Y7;D6RAN4;P32969	TRUE	TRUE	TRUE
A0A2R8Y605	TRUE	TRUE	TRUE
A0A2R8Y635;A0A2R8YDN7;Q9H7F0;Q9H7F0-2	TRUE	TRUE	TRUE
A0A2R8Y640	TRUE	TRUE	TRUE
A0A2R8Y648	TRUE	TRUE	TRUE
A0A2R8Y651;Q8TF64	FALSE	TRUE	TRUE
A0A2R8Y653;Q9BZX2	TRUE	TRUE	TRUE
A0A2R8Y661;A0A2R8YGD3;Q9Y4G8	TRUE	TRUE	TRUE
A0A2R8Y6D0	TRUE	TRUE	TRUE
A0A2R8Y6I6;A0A2R8Y6L5;A0A2R8YDF3;Q13627;Q13627-2;Q13627-3;Q13627-4;Q13627-5	TRUE	TRUE	TRUE
A0A2R8Y6K8;Q7Z5P9;Q7Z5P9-2	FALSE	FALSE	TRUE
A0A2R8Y6P2;A0A2R8YDC4;A6NFE3;C9J654;J3KR48;J3KR52	TRUE	TRUE	TRUE
A0A2R8Y6W8;P19447	TRUE	TRUE	TRUE
A0A2R8Y6Y7;A0A2R8YDQ9;Q9P2R7;Q9P2R7-2	TRUE	TRUE	TRUE
A0A2R8Y783	TRUE	TRUE	TRUE
A0A2R8Y7B4	TRUE	TRUE	TRUE
A0A2R8Y7D5	TRUE	TRUE	TRUE
A0A2R8Y7E6;A0A5F9ZHX3;A0A5F9ZI57	TRUE	TRUE	TRUE
A0A2R8Y7I9;A0A2R8Y855;A0A2U3TZQ7;B4DGM3;J3QKS7;Q969G3;Q969G3-2;Q969G3-4;Q969G3-5	TRUE	TRUE	TRUE
A0A2R8Y7J6;A0A2R8YD89;A0A2R8YEZ2;H3BNF9;H3BS01;Q9Y2V0;Q9Y2V0-2	FALSE	TRUE	FALSE
A0A2R8Y7P6;A0A5F9ZHW5;F8VQP2;Q99700;Q99700-4;V9GY86	TRUE	TRUE	TRUE
A0A2R8Y7Q1;E7ETD6;E9PE19;F5GXF5;Q12830;Q12830-2;Q12830-4	TRUE	TRUE	TRUE
A0A2R8Y7Q6;Q04864;Q04864-2	FALSE	TRUE	FALSE
A0A2R8Y7R4;B2RUZ4;H3BS66	TRUE	TRUE	TRUE
A0A2R8Y7T6;A0A3B3IRZ4;Q6DN90;Q6DN90-3	TRUE	TRUE	TRUE
A0A2R8Y7U0;H0Y770;O75140;O75140-1;O75140-4;O75140-9	TRUE	TRUE	TRUE
A0A2R8Y7V5;H0Y850;P38398;P38398-4;P38398-7;P38398-8;Q5YLB2	TRUE	TRUE	TRUE
A0A2R8Y7X9;P69891;P69892	TRUE	TRUE	TRUE
A0A2R8Y7Y4;Q8N8A2;Q8N8A2-2;Q8N8A2-4	TRUE	TRUE	TRUE
A0A2R8Y811;P62263	TRUE	TRUE	TRUE
A0A2R8Y840;Q9HCK8;Q9HCK8-2	TRUE	TRUE	TRUE
A0A2R8Y849;A0A2R8Y8A0;A0A2R8YD14;E7ETK0;P62847;P62847-2;P62847-3;P62847-4	TRUE	TRUE	TRUE
A0A2R8Y851;P62273;P62273-2	TRUE	TRUE	TRUE
A0A2R8Y852;A0A2R8YDI1;P39880;P39880-2;P39880-3;P39880-4;P39880-5;P39880-6	TRUE	TRUE	TRUE
A0A2R8Y880;Q7Z6E9;Q7Z6E9-2	TRUE	TRUE	TRUE
A0A2R8Y8E0;A0A2U3TZI2;H7C560;P15056	TRUE	TRUE	TRUE
A0A2R8YCJ8;Q5T2H3;Q9NVV5;Q9NVV5-1;Q9NVV5-3	TRUE	TRUE	TRUE
A0A2R8YCL1;Q13322;Q13322-3;Q13322-4	TRUE	TRUE	TRUE
A0A2R8YCS7;Q9Y3Z3	TRUE	TRUE	TRUE
A0A2R8YCV2;Q8NCS4	TRUE	FALSE	FALSE
A0A2R8YD30;P11171;P11171-2;P11171-3;P11171-4;Q4VB86	TRUE	TRUE	TRUE
A0A2R8YD49;A0A2R8YDU7;A0A2R8YEX0;Q9H1P3;Q9H1P3-2	TRUE	FALSE	TRUE
A0A2R8YD63;Q92547	TRUE	TRUE	TRUE
A0A2R8YD85;Q96BY6;Q96BY6-3	TRUE	TRUE	FALSE
A0A2R8YDB8;H7BXF5;Q9H0E3;Q9H0E3-3	TRUE	TRUE	TRUE
A0A2R8YDC7;A0A2R8YE40;A0A2R8YF99;A0A2R8YFQ8;A0A2R8YGK2;F8W7S1;Q8NAN2;Q8NAN2-2	FALSE	TRUE	TRUE
A0A2R8YDD5;P30531	TRUE	TRUE	TRUE
A0A2R8YDI5;O94823;O94823-2;O94823-3	TRUE	TRUE	FALSE
A0A2R8YDL0;O75443	TRUE	TRUE	TRUE
A0A2R8YDQ0;Q9H267	TRUE	TRUE	TRUE
A0A2R8YDR8;Q9BZD2;Q9BZD2-2	TRUE	TRUE	FALSE
A0A2R8YDT1;P15104	TRUE	TRUE	TRUE
A0A2R8YE10;Q9NRW7	TRUE	TRUE	TRUE
A0A2R8YE69;P0CG41;Q8IX94	TRUE	TRUE	TRUE
A0A2R8YE77;A0A2U3TZM1;O14936;O14936-3	TRUE	TRUE	TRUE
A0A2R8YEA1;B5MCJ9;O15016;O15016-2	TRUE	TRUE	TRUE
A0A2R8YEH1	TRUE	TRUE	TRUE
A0A2R8YEI5;P52757;P52757-9	TRUE	TRUE	TRUE
A0A2R8YEL6	TRUE	TRUE	TRUE
A0A2R8YEM2;D6RG18;D6RHI7;P51946	TRUE	TRUE	TRUE
A0A2R8YEM9;O15050	TRUE	TRUE	TRUE
A0A2R8YEZ0;B7WP89;Q0P651;Q0P651-2;Q0P651-3;Q0P651-4	TRUE	TRUE	TRUE
A0A2R8YF49	TRUE	TRUE	TRUE
A0A2R8YF72;A0A3B3IRF0;A0A3B3IRT9;A0A3B3IRX5;A0A3B3ISI4;A0A3B3ISW5;A0A3B3ITJ8;A0A3B3ITL3;A0A3B3ITS6;A0A3B3IUE2;H7BYU4;Q9UL68;Q9UL68-4	TRUE	TRUE	TRUE
A0A2R8YFF1;Q8N302	FALSE	TRUE	TRUE
A0A2R8YFG2;Q96T66	TRUE	TRUE	TRUE
A0A2R8YFH5;Q15437	TRUE	TRUE	TRUE
A0A2R8YFL3	FALSE	TRUE	TRUE
A0A2R8YFN3;A1Z1Q3;A1Z1Q3-1	TRUE	TRUE	TRUE
A0A2R8YFN7	TRUE	TRUE	FALSE
A0A2R8YFW3;O60907;O60907-2	TRUE	TRUE	TRUE
A0A2R8YFX0;Q969X2;Q969X2-2	FALSE	TRUE	TRUE
A0A2R8YG42;B1ALK7;Q14155-1;Q14155-5	TRUE	TRUE	TRUE
A0A2R8YGH5;H7C1E4;P61966	TRUE	TRUE	TRUE
A0A2R8YGW0;P51795;P51795-1	TRUE	TRUE	TRUE
A0A2R8YHG5;Q9BZV2	TRUE	TRUE	TRUE
A0A2U3TZH3;Q05639	TRUE	TRUE	TRUE
A0A2U3TZK7	TRUE	TRUE	TRUE
A0A2U3TZL5;E9PNW4;P13987;P13987-2	TRUE	TRUE	TRUE
A0A2U3TZN6	FALSE	TRUE	TRUE
A0A2U3TZT9	TRUE	TRUE	TRUE
A0A2U3TZU2;P06744	TRUE	TRUE	TRUE
A0A2U3TZV8;Q4KWH8;Q4KWH8-2;Q4KWH8-3;Q4KWH8-4	TRUE	TRUE	TRUE
A0A2Y9D025;P56556;R4GN43	TRUE	TRUE	TRUE
A0A384DVU0;Q8IY17;Q8IY17-2;Q8IY17-3	TRUE	TRUE	TRUE
A0A3B3IQ51;P36980;P36980-2;V9GYE7	FALSE	TRUE	TRUE
A0A3B3IRE4;Q8TCE6;Q8TCE6-2	TRUE	TRUE	TRUE
A0A3B3IRH7;H7C083;Q8TDX9;Q8TDX9-2	FALSE	FALSE	TRUE
A0A3B3IRI9;A0A3B3IRJ3;A0A3B3IRV1;A0A3B3IRZ0;A0A3B3IS37;A0A3B3IS68;A0A3B3ISJ4;A0A3B3IT04;A0A3B3IT30;A0A3B3ITZ3;A0A3B3IU52;A6NFW1;A6NGJ7;Q9BY41;Q9BY41-4	TRUE	TRUE	TRUE
A0A3B3IRJ9;Q9Y2H2	TRUE	TRUE	TRUE
A0A3B3IRK5;Q9H2D1	TRUE	TRUE	TRUE
A0A3B3IRL2;O75629	TRUE	TRUE	TRUE
A0A3B3IRL5;C9J381;P20839;P20839-2;P20839-3;P20839-4;P20839-5;P20839-6;P20839-7	TRUE	TRUE	TRUE
A0A3B3IRM7	TRUE	FALSE	TRUE
A0A3B3IRN8;A0A3B3ITX0;P24311	TRUE	TRUE	TRUE
A0A3B3IRP9	TRUE	TRUE	FALSE
A0A3B3IRQ5	FALSE	TRUE	FALSE
A0A3B3IRQ7	FALSE	TRUE	TRUE
A0A3B3IRQ9;P55265-2;P55265-3	FALSE	FALSE	TRUE
A0A3B3IRR1;A0A3F2YNY7;P08397;P08397-2	TRUE	TRUE	TRUE
A0A3B3IRS4;A0A3B3IRX3;A0A3B3IS46;H0YHC1;Q71F56	TRUE	TRUE	TRUE
A0A3B3IRT8;C9IZQ1;C9J3L8;C9J5W0;E9PAL7;P43307	TRUE	TRUE	TRUE
A0A3B3IRU6;A0A3B3ISL2;Q9GZU2;Q9GZU2-2;Q9GZU2-4	TRUE	TRUE	TRUE
A0A3B3IRY8	TRUE	TRUE	TRUE
A0A3B3IRZ5;Q8IYE1	TRUE	TRUE	TRUE
A0A3B3IS06;E7ETY2;Q13428-3;Q13428-7;Q13428-8	TRUE	TRUE	TRUE
A0A3B3IS13	TRUE	TRUE	TRUE
A0A3B3IS24;C9JIR6;O75688;O75688-2;O75688-4	TRUE	TRUE	TRUE
A0A3B3IS40;A0A3B3ISE6;A0A3B3IT25;A0A3B3ITA8;A0A3B3ITA9;A0A3B3ITE7;A0A3B3ITJ7;B3KV94;Q9UGL1;Q9UGL1-2	TRUE	TRUE	TRUE
A0A3B3IS62;A0A3B3ITD6;A0A3B3ITI5;Q9Y672;S4R350	TRUE	TRUE	TRUE
A0A3B3IS66	FALSE	TRUE	FALSE
A0A3B3IS71;P06400	TRUE	TRUE	TRUE
A0A3B3IS75;K7EIP0;K7EJD9;K7ESF2;P13686	TRUE	TRUE	TRUE
A0A3B3ISA5	FALSE	TRUE	FALSE
A0A3B3ISF0;Q659C4;Q659C4-2	TRUE	TRUE	TRUE
A0A3B3ISF6;Q96G42	FALSE	FALSE	TRUE
A0A3B3ISF9;P42892;P42892-2;P42892-3;P42892-4	TRUE	TRUE	TRUE
A0A3B3ISG5;P14735	TRUE	TRUE	TRUE
A0A3B3ISG8	TRUE	TRUE	TRUE
A0A3B3ISH6;Q86U38;Q86U38-2	TRUE	TRUE	TRUE
A0A3B3ISJ2;Q96KQ4	TRUE	TRUE	TRUE
A0A3B3ISK7;Q6PI48	TRUE	TRUE	TRUE
A0A3B3ISP1;A0A3B3ITU5;Q92625;Q92625-2	TRUE	TRUE	TRUE
A0A3B3ISQ4;Q9H6S3	TRUE	TRUE	TRUE
A0A3B3ISR2;B4DPQ0;P00736	TRUE	TRUE	TRUE
A0A3B3ISR7;E9PIF2;Q13206	TRUE	TRUE	TRUE
A0A3B3ISS6	TRUE	TRUE	TRUE
A0A3B3IST1;B5MD23;O75954	TRUE	TRUE	TRUE
A0A3B3IST8;B9ZVM7;E7ENI6;E9PDL4;F8WBQ1;Q05084;Q05084-2;Q05084-3;Q6LCR0;Q8NDH6	FALSE	TRUE	FALSE
A0A3B3ISU0;Q02487	TRUE	TRUE	TRUE
A0A3B3ISV3;P02462	TRUE	TRUE	TRUE
A0A3B3ISV4	TRUE	TRUE	TRUE
A0A3B3ISV5;Q8N9N7	TRUE	TRUE	TRUE
A0A3B3ISV8;A0A6Q8PF19;A0A6Q8PFS9;A0A6Q8PHH0;Q8IZF0	TRUE	TRUE	TRUE
A0A3B3ISV9;O43414	TRUE	TRUE	TRUE
A0A3B3IT21	TRUE	TRUE	TRUE
A0A3B3IT28;A0A3B3ITE5;A0A3B3ITF7;A0A3B3ITW6;A0A3B3IU40;A0A3B3IUA1;A0A3F2YNW9;Q12756;Q12756-2;Q12756-3	TRUE	TRUE	TRUE
A0A3B3IT31;Q9NUN5;Q9NUN5-3	TRUE	TRUE	TRUE
A0A3B3IT37;Q5SXQ3;Q5SXQ5;Q8IYK4	TRUE	TRUE	FALSE
A0A3B3IT82;H0YNU5;P54132	FALSE	FALSE	TRUE
A0A3B3IT92;P33991	TRUE	TRUE	TRUE
A0A3B3ITH3;Q9P2X3	TRUE	TRUE	TRUE
A0A3B3ITJ4	FALSE	TRUE	TRUE
A0A3B3ITK0;P35442	TRUE	TRUE	TRUE
A0A3B3ITN0;Q86TP1	TRUE	TRUE	TRUE
A0A3B3ITN6;D6RBB0;O60683;O60683-2	TRUE	TRUE	TRUE
A0A3B3ITP4;Q495G5;Q8IVH4	TRUE	TRUE	TRUE
A0A3B3ITT1	TRUE	TRUE	TRUE
A0A3B3ITT5;P47914	TRUE	TRUE	TRUE
A0A3B3ITU8;A0A3B3IU04;A0A3F2YNW8;Q14643;Q14643-2;Q14643-3;Q14643-4;Q14643-5;Q14643-6;Q14643-7;Q14643-8	TRUE	TRUE	TRUE
A0A3B3ITW1;P49841;P49841-2	TRUE	TRUE	TRUE
A0A3B3ITZ6	FALSE	FALSE	TRUE
A0A3B3IU24;Q92743	FALSE	TRUE	TRUE
A0A3B3IU42;G5EA29;H0YDP6;H0YEL0;O14893;O14893-2;O14893-3	TRUE	TRUE	TRUE
A0A3B3IU65;A9UHW6;A9UHW6-2;A9UHW6-3;J3KSU6;J3QLD1;J3QLJ5;J3QRZ6	TRUE	TRUE	TRUE
A0A3B3IU69;F8W717;O00423;O00423-3	TRUE	TRUE	TRUE
A0A3B3IUA2;B1AHD1;P55769	TRUE	TRUE	TRUE
A0A3B3IUB1;Q13144	TRUE	TRUE	TRUE
A0A3B3IUB5;Q8TCT9;Q8TCT9-5	TRUE	TRUE	TRUE
A0A3B3IUC4;A0A6Q8PFA9;P06280	TRUE	TRUE	TRUE
A0A3B3IUD2;Q9BUK6;Q9BUK6-2;Q9BUK6-3;Q9BUK6-7	TRUE	TRUE	TRUE
A0A3B3IUD4;P21453	TRUE	TRUE	TRUE
A0A3B3IUD7;Q14690	TRUE	TRUE	TRUE
A0A3Q5ACI7	TRUE	FALSE	TRUE
A0A494BWY4;Q6IEE7	TRUE	TRUE	FALSE
A0A494BXY3;E9PLD3;E9PRG8	TRUE	TRUE	TRUE
A0A494BZU6;A0A494BZW7;A0A494C002;A0A494C0P9;A0A494C0Q2;A0A494C0Q6;A0A494C0W0;A0A494C156;A0A494C1K5;A0A494C1N1;O95453;O95453-2	TRUE	TRUE	TRUE
A0A494BZV4;A0A494C069;Q08AG5	TRUE	TRUE	TRUE
A0A494BZZ6;P78549;P78549-2;P78549-3	FALSE	TRUE	TRUE
A0A494C004;A0A494C0C5;A0A494C0D2;A0A494C0V5;A0A494C141;A0A494C1C6;A0A499FJ53;A6XNE1;F6Y2X3;Q16635;Q16635-2;Q16635-3;Q16635-4;Q16635-5;Q16635-6;Q16635-7;Q16635-8;Q16635-9	TRUE	FALSE	TRUE
A0A494C023	TRUE	FALSE	FALSE
A0A494C028;H0Y993;P35659	TRUE	TRUE	TRUE
A0A494C039	TRUE	TRUE	TRUE
A0A494C066;B7Z4W5;Q16773	TRUE	TRUE	TRUE
A0A494C068;A0A494C1K7;E9PGP6;Q9UGJ0;Q9UGJ0-2;Q9UGJ0-3	TRUE	TRUE	TRUE
A0A494C0C1	FALSE	TRUE	TRUE
A0A494C0J7;Q08188	TRUE	TRUE	TRUE
A0A494C0K7;A0A494C0P0;Q6P2C8;Q6P2C8-2	TRUE	TRUE	TRUE
A0A494C0M1;P52701	TRUE	TRUE	TRUE
A0A494C0M2;O95925-3;Q9BQY6;Q9BQY6-2	TRUE	TRUE	TRUE
A0A494C0N4;H9KV93;Q7Z4L5	TRUE	TRUE	TRUE
A0A494C0P1;P04150;P04150-10;P04150-2;P04150-3;P04150-6;P04150-8;P04150-9	TRUE	TRUE	TRUE
A0A494C0Q3	TRUE	TRUE	FALSE
A0A494C0R8	TRUE	TRUE	TRUE
A0A494C0X7;D3DSM0;P05107	TRUE	TRUE	TRUE
A0A494C0Z5;Q9H082	TRUE	TRUE	TRUE
A0A494C100;Q9UJA2;Q9UJA2-2	FALSE	TRUE	TRUE
A0A494C105;Q9H3U5;Q9H3U5-3;Q9H3U5-5;Q9H3U5-6	TRUE	TRUE	TRUE
A0A494C108;Q8N9T8	TRUE	TRUE	TRUE
A0A494C115;A0A494C1U4;K7N7A8;P29972;P29972-2;P29972-3;P29972-4	TRUE	TRUE	TRUE
A0A494C120;C9J8H5;Q9HA38;Q9HA38-2	FALSE	FALSE	TRUE
A0A494C143;Q14689;Q14689-6	TRUE	TRUE	TRUE
A0A494C146;P50336	TRUE	TRUE	TRUE
A0A494C151;Q4UJ75;Q5CZ79;Q5CZ79-2;Q5SQ80;Q5TYW2;Q5VUR7	FALSE	TRUE	FALSE
A0A494C164;P52630;P52630-4	TRUE	TRUE	TRUE
A0A494C165;K7ES25;P12955	TRUE	TRUE	TRUE
A0A494C167;Q9UHD2	TRUE	TRUE	TRUE
A0A494C172	FALSE	TRUE	TRUE
A0A494C193;Q08E93	TRUE	TRUE	TRUE
A0A494C1C4;P78552;P78552-2	TRUE	TRUE	FALSE
A0A494C1F2;P35658;P35658-2;P35658-3;P35658-4;P35658-5	TRUE	TRUE	TRUE
A0A494C1J1;Q69YQ0;Q69YQ0-2	TRUE	TRUE	TRUE
A0A494C1J8	TRUE	TRUE	TRUE
A0A494C1L5;P50851-2	TRUE	TRUE	TRUE
A0A494C1M4;Q3SY69	TRUE	TRUE	TRUE
A0A494C1N0;P26885	TRUE	TRUE	TRUE
A0A494C1S7;Q9Y5Q9	TRUE	TRUE	TRUE
A0A494C1T9;Q6ZRV2	TRUE	TRUE	TRUE
A0A494C1V1;Q6ZNJ1;Q6ZNJ1-2;Q6ZNJ1-3	TRUE	TRUE	TRUE
A0A499FI31;Q15020;Q15020-4	TRUE	TRUE	TRUE
A0A499FI48;P13667	TRUE	TRUE	TRUE
A0A499FIS5;A0A499FJN1;A0A499FJS1;Q9BUB5;Q9BUB5-2;Q9BUB5-3	TRUE	TRUE	TRUE
A0A499FIX8;A0FGR8-2;H7BXI1	TRUE	TRUE	TRUE
A0A499FIY8;C9JC07;C9JZL8;Q96S97	TRUE	TRUE	TRUE
A0A499FIZ0	TRUE	TRUE	TRUE
A0A499FJ41;K7ES72;Q13938;Q13938-3;Q13938-4	FALSE	TRUE	TRUE
A0A499FJI4;O75592;O75592-2	TRUE	TRUE	TRUE
A0A499FJM4;P08684	TRUE	TRUE	TRUE
A0A4V7I447;Q0VD83;Q0VD83-2	FALSE	TRUE	TRUE
A0A4W8VYG7;A0A4W8W4R1;Q99674	FALSE	TRUE	FALSE
A0A539;A0A589	TRUE	TRUE	TRUE
A0A590PXD8;Q53SF7-3	TRUE	TRUE	TRUE
A0A590UIU4;A0A590UJ09;A0A590UJ61;A0A590UJC8;A0A590UJF4;A0A590UJG1;A0A590UJH1;A0A590UJS0;A0A590UJT1;A0A590UK11;A0A590UK42;A0A590UK98;Q5VZ66	TRUE	TRUE	TRUE
A0A590UJ36;A6NDB9	TRUE	TRUE	TRUE
A0A590UJ43;P48729;P48729-3;U3KPX3	TRUE	TRUE	TRUE
A0A590UJ46	TRUE	TRUE	TRUE
A0A590UJ50;A0A590UJR3;Q13616	TRUE	TRUE	TRUE
A0A590UJ62;E7ETH1;Q14003	TRUE	TRUE	TRUE
A0A590UJ68;A0A590UJR5;A0A590UJS9;A0A590UKA8;Q12959;Q12959-3;Q12959-5;Q12959-6;Q12959-7	TRUE	TRUE	TRUE
A0A590UJ73;A0A590UJW4;E7EQB3;Q9BSV6	TRUE	TRUE	TRUE
A0A590UJA9;C9JCW7;C9JE12;Q9BVT8	TRUE	TRUE	TRUE
A0A590UJB6	TRUE	TRUE	TRUE
A0A590UJC7;A0A590UK51;O60733;O60733-2	TRUE	TRUE	TRUE
A0A590UJF0;P63092-3	TRUE	TRUE	TRUE
A0A590UJG2;Q9UPN3-2;Q9UPN3-3	TRUE	TRUE	TRUE
A0A590UJK3;Q14BN4;Q14BN4-2;Q14BN4-3	TRUE	TRUE	TRUE
A0A590UJK4;A0A590UJP7;A0A590UK01;A0A590UK80;Q13247;Q13247-3	TRUE	TRUE	TRUE
A0A590UJL0;P08842	TRUE	TRUE	TRUE
A0A590UJN0;E7ETK1;E9PBA8;Q52LR7;Q9H2F5;Q9H2F5-2	TRUE	TRUE	TRUE
A0A590UJS8;A0A5F9ZA98;B4DGL8;O75027;O75027-2	TRUE	TRUE	TRUE
A0A590UJW0;A0A590UKC9;P20585	TRUE	TRUE	TRUE
A0A590UJW8;Q96J02;Q96J02-2	TRUE	TRUE	TRUE
A0A590UJY5	TRUE	TRUE	TRUE
A0A590UK09;A0A590UK73;B1AKN5;B1AKN7;B1AKN8;Q12857;Q12857-2;Q12857-4	TRUE	TRUE	TRUE
A0A590UK87	TRUE	TRUE	TRUE
A0A590UKC3;Q9UF12	TRUE	TRUE	TRUE
A0A5E8;Q99501;Q99501-2;Q99501-3;Q99501-4	TRUE	TRUE	TRUE
A0A5F9UK94;H0Y360;Q01433;Q01433-2	TRUE	TRUE	TRUE
A0A5F9UP49;Q9BRK5	TRUE	TRUE	TRUE
A0A5F9UY30;A0A5H1ZRP2;O43493;O43493-3;O43493-5;O43493-7	TRUE	TRUE	TRUE
A0A5F9YFS9;C9JBL1;Q9Y6A9	TRUE	TRUE	TRUE
A0A5F9YLF9	TRUE	TRUE	TRUE
A0A5F9ZGN6	TRUE	TRUE	TRUE
A0A5F9ZGW5;C9J8U3;Q7Z2E3-13;Q7Z2E3-5;Q7Z2E3-7;Q7Z2E3-9	TRUE	TRUE	TRUE
A0A5F9ZGX0	TRUE	TRUE	TRUE
A0A5F9ZGX3;A0A5F9ZGY3;A0A5F9ZGY4;A0A5F9ZGZ5;A0A5F9ZH19;A0A5F9ZH30;A0A5F9ZHD2;A0A5F9ZHE4;A0A5F9ZHN5;A0A5F9ZHR8;A0A5F9ZHS1;A0A5F9ZI30;A0A5F9ZI40;A0A5F9ZI65;D6RHE1;I6L894;Q01484	TRUE	TRUE	TRUE
A0A5F9ZGY7	TRUE	TRUE	TRUE
A0A5F9ZH13;E9PR06;Q9NQC8;Q9NQC8-2	FALSE	TRUE	TRUE
A0A5F9ZH20;A0A5F9ZH60;A0A5F9ZH84;Q5TF39	TRUE	TRUE	TRUE
A0A5F9ZH43;A0A5F9ZHW6;A4UGR9-4;A4UGR9-5;A4UGR9-6;A4UGR9-7	TRUE	TRUE	FALSE
A0A5F9ZH85	TRUE	TRUE	FALSE
A0A5F9ZH93;A0A5F9ZHX9;Q9UHN1	TRUE	TRUE	TRUE
A0A5F9ZHE0;C9JQD1;P35557	TRUE	TRUE	TRUE
A0A5F9ZHH6;P19793;P19793-2	TRUE	TRUE	TRUE
A0A5F9ZHJ0	TRUE	TRUE	TRUE
A0A5F9ZHM4;P07195	TRUE	TRUE	TRUE
A0A5F9ZHN2;E7EWD6;Q76L83;Q76L83-2	TRUE	TRUE	TRUE
A0A5F9ZHN7;Q9NTJ5	TRUE	TRUE	TRUE
A0A5F9ZHN9;P51648;P51648-2	TRUE	TRUE	TRUE
A0A5F9ZHP1;Q8N9N2-2	TRUE	TRUE	TRUE
A0A5F9ZHQ6;A0A6I8PIF8;A0A6I8PIP2;A0A6I8PU78;O75071;S4R3Q1	TRUE	TRUE	FALSE
A0A5F9ZHX8;A0A5F9ZHZ5;F5GYY5;F5H324;P51690	TRUE	TRUE	TRUE
A0A5F9ZI21;Q92974;Q92974-2;Q92974-3;V9GYF0;V9GYM8	TRUE	TRUE	TRUE
A0A5F9ZI33	TRUE	TRUE	TRUE
A0A5F9ZI63;O75530;O75530-2;O75530-3	FALSE	TRUE	TRUE
A0A5F9ZI76;Q32ZL2;Q32ZL2-2	TRUE	TRUE	TRUE
A0A5H1ZRP4;Q8WX92;Q8WX92-2	TRUE	TRUE	TRUE
A0A5H1ZRR2;G9CGD6;G9CGD6-2;G9CGD6-3;Q6P9H4	TRUE	TRUE	TRUE
A0A5H1ZRS1	TRUE	TRUE	TRUE
A0A5K1VW60;Q99766	TRUE	TRUE	TRUE
A0A5K1VW61;A0A5K1VW71;A0A5K1VW79;A0A5K1VW93;H0Y9D9;Q7Z5Q1;Q7Z5Q1-3;Q7Z5Q1-4;Q7Z5Q1-5;Q7Z5Q1-6;Q7Z5Q1-7;Q7Z5Q1-8;Q7Z5Q1-9;Q8NE35;Q8NE35-2	FALSE	FALSE	TRUE
A0A5K1VW66;P35240;P35240-2;P35240-3;P35240-4;P35240-5;P35240-6;P35240-8	TRUE	TRUE	TRUE
A0A5K1VW70;P98198;P98198-3	TRUE	TRUE	FALSE
A0A5K1VW95;P40925;P40925-3	TRUE	TRUE	TRUE
A0A669KA36;A0A669KB88;B7ZLR4;E7ET55;F5H748;P35670;P35670-2;P35670-4	TRUE	TRUE	TRUE
A0A669KAV7;A0A669KBH9;M0QXA7;O95785-3	TRUE	TRUE	TRUE
A0A669KAW1;G3XAD2;Q9BYC5;Q9BYC5-2;Q9BYC5-3	TRUE	TRUE	TRUE
A0A669KAX3;O76024	TRUE	TRUE	TRUE
A0A669KAX4;K4DI93;Q13620;Q13620-1;Q13620-3	TRUE	TRUE	TRUE
A0A669KAX9;Q5T653	TRUE	TRUE	TRUE
A0A669KAY5;A0A669KB27;A0A669KBH7;C9JTE9;Q9UHQ4;Q9UHQ4-2	TRUE	TRUE	TRUE
A0A669KB10;A0A669KBG8;Q92538;Q92538-2;Q92538-3	TRUE	TRUE	TRUE
A0A669KB12;Q09472	TRUE	TRUE	TRUE
A0A669KB29;K7EQ21;K7EQZ1;Q9P0U4;Q9P0U4-2	TRUE	TRUE	TRUE
A0A669KB41;A0A669KBH5;D6RA31;E7EPV7;P37840;P37840-2;Q16143	TRUE	TRUE	TRUE
A0A669KB53;A0A669KB56;A0A669KB68;A0A669KBA4;A0A669KBI6;J3KPM9;P42224;P42224-2	TRUE	TRUE	TRUE
A0A669KB62;O60716-20;O60716-22;O60716-23;O60716-24	FALSE	TRUE	FALSE
A0A669KB69;Q6Q788	TRUE	TRUE	TRUE
A0A669KB71;O94842;O94842-2;O94842-3	TRUE	TRUE	TRUE
A0A669KB81	TRUE	TRUE	TRUE
A0A669KBD5;A0A669KBI7;Q9UMN6	FALSE	TRUE	FALSE
A0A669KBE6;A0A669KBF5;Q9NV96;Q9NV96-2;Q9NV96-3	TRUE	TRUE	TRUE
A0A669KBF4;O00327;O00327-1;O00327-6;O00327-7;O00327-8;O00327-9	TRUE	TRUE	TRUE
A0A669KBG1	TRUE	TRUE	TRUE
A0A669KBH1	TRUE	TRUE	TRUE
A0A669KBH4;Q14999;Q14999-2	TRUE	TRUE	TRUE
A0A669KBJ1;Q9P202;Q9P202-3;Q9P202-4	TRUE	TRUE	TRUE
A0A669KBJ4;E7ERL6;Q6P0Q8;Q6P0Q8-2	TRUE	TRUE	TRUE
A0A669KBJ7;Q9H2P0	TRUE	TRUE	TRUE
A0A669KBL1;Q93009;Q93009-3	TRUE	TRUE	TRUE
A0A6E1WB48;Q14541;Q14541-2	TRUE	TRUE	TRUE
A0A6E1WCP9;H0YGT3;P11474;P11474-2	TRUE	FALSE	FALSE
A0A6I8PIT3;A0A6I8PIV1;Q9P2J5	TRUE	TRUE	TRUE
A0A6I8PR89	TRUE	TRUE	FALSE
A0A6I8PRM6;B1ALU3;O95490-2;O95490-5	TRUE	TRUE	TRUE
A0A6I8PS32;Q99615	TRUE	TRUE	TRUE
A0A6I8PTZ8;Q9UL18	TRUE	TRUE	TRUE
A0A6I8PU65;Q9NUD9	TRUE	TRUE	TRUE
A0A6Q8JGF9;I3L1H5;I3L3X9;Q9BZG8;Q9BZG8-2;Q9BZG8-3	TRUE	TRUE	TRUE
A0A6Q8JH89;A0A6Q8LYX2;Q86WD7;Q86WD7-2;Q86WD7-4;Q86WD7-5;Q86WD7-6;Q86WD7-7	FALSE	TRUE	TRUE
A0A6Q8JR05;Q6V0I7;Q6V0I7-3	FALSE	TRUE	TRUE
A0A6Q8KRG2;Q08379	TRUE	TRUE	TRUE
A0A6Q8PEX6;A0A6Q8PFB7;A0A6Q8PG86;A0A6Q8PHF4;O95163	TRUE	TRUE	TRUE
A0A6Q8PEY3;A0A6Q8PGV6;I3L3G9;I3L522;Q9NXR1;Q9NXR1-1	TRUE	TRUE	TRUE
A0A6Q8PEZ4;A0A6Q8PFG4;A0A6Q8PGL3;A0A6Q8PGS2;A0A6Q8PGU0;A0A6Q8PH79;B4DIH2;Q8TB36;Q8TB36-2	TRUE	TRUE	TRUE
A0A6Q8PEZ7;A0A6Q8PG30;A0A6Q8PHQ1;Q96S66	TRUE	TRUE	TRUE
A0A6Q8PEZ8;A0A6Q8PGJ3;J3KNA1;Q12840	TRUE	FALSE	FALSE
A0A6Q8PF03	TRUE	TRUE	TRUE
A0A6Q8PF05;B4DHE8;J3KTC1;Q96DH6;Q96DH6-2	TRUE	TRUE	TRUE
A0A6Q8PF10;A0A6Q8PF85;A0A6Q8PFT0;A0A6Q8PFW0;A0A6Q8PFY8;A0A6Q8PG57;A0A6Q8PHF1;B0QYZ8;B0QYZ9;O95461;O95461-2;V9GY39;V9GY56;V9GYK8;X5DRG1	FALSE	TRUE	TRUE
A0A6Q8PF14	TRUE	TRUE	TRUE
A0A6Q8PF33;A0A6Q8PGE8;A0A6Q8PGN5;H3BPK7;P49588	TRUE	TRUE	TRUE
A0A6Q8PF40;A0A6Q8PFC4;A0A6Q8PFY7;A0A6Q8PG00;A0A6Q8PG04;A0A6Q8PGS4;A0A6Q8PH27;A0A6Q8PH89;Q92734;Q92734-2;Q92734-3;Q92734-4	TRUE	TRUE	TRUE
A0A6Q8PF44;A0A6Q8PH71;A0A6Q8PHA2;A0A6Q8PHG2;Q27J81;Q27J81-2	TRUE	TRUE	TRUE
A0A6Q8PF62;A0A6Q8PF70;A0A6Q8PF86;A0A6Q8PFJ3;A0A6Q8PG59;A0A6Q8PGB4;A0A6Q8PGP4;A0A6Q8PGY4;A0A6Q8PGY7;A0A6Q8PHA1;A0A6Q8PHC7;A0A6Q8PHH5;A0A6Q8PHK3;A0A6Q8PHP5;Q92562	TRUE	TRUE	TRUE
A0A6Q8PF83;A0A6Q8PGD1;A0A6Q8PH95;D6REX9;Q8N960;Q8N960-2	TRUE	FALSE	TRUE
A0A6Q8PF94;O15344	TRUE	TRUE	TRUE
A0A6Q8PFA4;A0A6Q8PFD4;A0A6Q8PFI6;A0A6Q8PFL5;A0A6Q8PFT9;A0A6Q8PFW1;A0A6Q8PG02;A0A6Q8PG22;A0A6Q8PGB2;A0A6Q8PGF7;A0A6Q8PGH6;A0A6Q8PGT8;A0A6Q8PGW1;A0A6Q8PGY0;A0A6Q8PH15;A0A6Q8PH70;A0A6Q8PH85;Q6UWE0;Q6UWE0-2	TRUE	TRUE	TRUE
A0A6Q8PFA6;A0A6Q8PG37;A0A6Q8PGH7;A0A6Q8PH57;O00139;O00139-1;O00139-2;O00139-4;O00139-5	TRUE	TRUE	TRUE
A0A6Q8PFE6;Q9UKA9;Q9UKA9-2;Q9UKA9-3;Q9UKA9-4	TRUE	TRUE	TRUE
A0A6Q8PFG0;A0A6Q8PGT4;A0A6Q8PH04;A0A6Q8PHN3;A0A6Q8PHP9;Q9P212;Q9P212-2	TRUE	TRUE	TRUE
A0A6Q8PFI8;P11166	TRUE	TRUE	TRUE
A0A6Q8PFJ0;P02545	TRUE	TRUE	TRUE
A0A6Q8PFJ4;A0A6Q8PGV8;O95140	TRUE	TRUE	TRUE
A0A6Q8PFK4;P50747	TRUE	TRUE	TRUE
A0A6Q8PFM5;O95831;O95831-3	TRUE	TRUE	TRUE
A0A6Q8PFM9;A0A6Q8PFQ9;A0A6Q8PG83;A0A6Q8PGL8;A0A6Q8PGP3;A0A6Q8PGR8;A0A6Q8PH28;Q96JN0;Q96JN0-2;Q96JN0-3	FALSE	TRUE	FALSE
A0A6Q8PFU3;P43034	TRUE	TRUE	TRUE
A0A6Q8PFY3;Q9BXW9;Q9BXW9-1;Q9BXW9-3	FALSE	FALSE	TRUE
A0A6Q8PG17	FALSE	FALSE	TRUE
A0A6Q8PG52;A0A6Q8PH84;P51149	TRUE	TRUE	TRUE
A0A6Q8PG54;G3XAG5;P51793;P51793-2	TRUE	TRUE	TRUE
A0A6Q8PG85;Q9HD42	TRUE	TRUE	TRUE
A0A6Q8PGA8;A0A6Q8PGI6;A0A6Q8PGZ8;A0A6Q8PHH9;P41250	TRUE	TRUE	TRUE
A0A6Q8PGB0;P24928	TRUE	TRUE	TRUE
A0A6Q8PGM6;Q9UJY1	TRUE	TRUE	TRUE
A0A6Q8PGS5;A0A6Q8PHS7;C9JEX3;Q13614;Q13614-2	TRUE	TRUE	TRUE
A0A6Q8PGU6;Q8NB90	TRUE	TRUE	TRUE
A0A6Q8PH13;A0A6Q8PH87;Q86WG5;Q86WG5-3	TRUE	TRUE	TRUE
A0A6Q8PH21;Q9UHW9;Q9UHW9-2;Q9UHW9-3;Q9UHW9-4;Q9UHW9-5;Q9UHW9-6	FALSE	TRUE	TRUE
A0A6Q8PH68;Q9UGU0;Q9UGU0-2	FALSE	TRUE	FALSE
A0A6Q8PH82	FALSE	TRUE	TRUE
A0A6Q8PHA5;E7ETE2;P12081;P12081-4	TRUE	TRUE	TRUE
A0A6Q8PHC6;P50440	TRUE	TRUE	TRUE
A0A6Q8PHH2;O95251;O95251-2;O95251-4	TRUE	TRUE	TRUE
A0A6Q8PHK0;Q14669-2	TRUE	TRUE	TRUE
A0A6Q8PHM5	TRUE	TRUE	FALSE
A0A6Q8PHP0;P49902;P49902-2	TRUE	TRUE	TRUE
A0AV96-2	TRUE	TRUE	TRUE
A0AVL1;F8WC54;Q13443;Q13443-2	TRUE	TRUE	TRUE
A0AVT1	TRUE	TRUE	TRUE
A0JLT2;A0JLT2-2;J3KR33	FALSE	TRUE	TRUE
A0MZ66	TRUE	TRUE	TRUE
A0PJW6	TRUE	TRUE	TRUE
A0PJX8	TRUE	TRUE	TRUE
A0PJZ3;C9JND4	TRUE	TRUE	TRUE
A0RZB6	TRUE	TRUE	TRUE
A1A4S6;H0Y8W5	TRUE	TRUE	TRUE
A1A519;A1A519-2;A1A519-3;D6RIE9	TRUE	TRUE	TRUE
A1A5C7;A1A5C7-2;A1A5C7-3;C9J4Z0	TRUE	TRUE	TRUE
A1IGU5	TRUE	TRUE	TRUE
A1KZ92;A1KZ92-2;A1KZ92-3;H0YAV0;K4DIA6	TRUE	TRUE	FALSE
A1L0T0	TRUE	TRUE	TRUE
A1L188	TRUE	TRUE	TRUE
A1L390;A1L390-3	TRUE	TRUE	TRUE
A1L3X0;D6RBM2;D6RHD0	FALSE	TRUE	FALSE
A1X283	TRUE	TRUE	TRUE
A2A274;Q99798	TRUE	TRUE	TRUE
A2A2L4;Q5JX74;Q9NUS5	TRUE	TRUE	TRUE
A2A2N0;O60676	TRUE	TRUE	TRUE
A2A2Q9;Q9Y312	TRUE	TRUE	TRUE
A2A2V1;P04156	TRUE	TRUE	TRUE
A2A2V2;P42696;P42696-2;Q5TCT4	TRUE	TRUE	TRUE
A2A369;Q8NF50;Q8NF50-2;Q8NF50-3;Q8NF50-4	TRUE	TRUE	TRUE
A2A3G7	TRUE	TRUE	TRUE
A2AJT9;A2AJT9-2;A2AJT9-3;F2Z385;H7BXX2	TRUE	TRUE	FALSE
A2IDC6;Q13084	TRUE	TRUE	TRUE
A2RRP1	TRUE	TRUE	TRUE
A2RTX5;B7ZLP8	TRUE	TRUE	TRUE
A2RU37	TRUE	TRUE	TRUE
A2RU49	TRUE	TRUE	TRUE
A2RUC4	TRUE	TRUE	TRUE
A2RUS2;A2RUS2-2;A2RUS2-4;E5RHH2;E5RI43;E5RIR7;E5RJ42;E9PF32;H0YAY3	TRUE	TRUE	TRUE
A2VCT4	FALSE	FALSE	TRUE
A2VDF0	TRUE	TRUE	TRUE
A2VDJ0;A2VDJ0-3;A2VDJ0-5	TRUE	TRUE	TRUE
A3KFL2;Q13868;Q13868-2;Q13868-3	TRUE	TRUE	TRUE
A3KMH1;A3KMH1-3	TRUE	TRUE	TRUE
A3KN83;A3KN83-2;A3KN83-3	TRUE	TRUE	TRUE
A4D1E9	TRUE	TRUE	TRUE
A4D1P6	TRUE	TRUE	TRUE
A4D1U4;C9J7X6	TRUE	TRUE	TRUE
A4D2B0	TRUE	TRUE	TRUE
A4FU69-5;A4FU69-6	TRUE	FALSE	FALSE
A5D8V6;F5H4Q5	TRUE	TRUE	TRUE
A5D8V7;A5D8V7-2;K7EN59;K7EPK8	TRUE	TRUE	TRUE
A5PLN9;A5PLN9-2;A5PLN9-4;A5PLN9-5	TRUE	TRUE	TRUE
A5YKK6;A5YKK6-2	TRUE	TRUE	TRUE
A6H8Y7;Q6ZRK6;Q6ZRK6-2	TRUE	TRUE	FALSE
A6NC57;A6NC57-2	TRUE	FALSE	FALSE
A6NC78	TRUE	TRUE	TRUE
A6NC98;A6NC98-4;A6NC98-6	FALSE	TRUE	FALSE
A6NCC9;C9JHT9;C9JJV1;E9PME3;Q9Y5U2;Q9Y5U2-2	TRUE	TRUE	TRUE
A6NCE7;H3BTL1;Q9GZQ8	TRUE	TRUE	TRUE
A6NCS6	TRUE	TRUE	TRUE
A6ND36	TRUE	TRUE	TRUE
A6ND91	TRUE	TRUE	TRUE
A6NDG6	TRUE	TRUE	TRUE
A6NDL8	TRUE	TRUE	TRUE
A6NDR6	TRUE	TRUE	TRUE
A6NDU8	TRUE	TRUE	TRUE
A6NE01;F5GYN0;F5H8C1	TRUE	TRUE	TRUE
A6NED2;G3V2I3	TRUE	TRUE	TRUE
A6NEE1	TRUE	TRUE	TRUE
A6NEL0;A6NL93;P05114	TRUE	TRUE	TRUE
A6NEL2	TRUE	TRUE	TRUE
A6NEM2;P51610;P51610-2;P51610-4	TRUE	TRUE	TRUE
A6NEY8	TRUE	TRUE	TRUE
A6NF36	TRUE	TRUE	TRUE
A6NFQ9;F8W8I8	TRUE	TRUE	TRUE
A6NFS0;Q9NSD4;Q9NSD4-2	TRUE	TRUE	TRUE
A6NFV8;D6RCT8	TRUE	TRUE	TRUE
A6NFX8;Q9UKK9	TRUE	TRUE	TRUE
A6NFY7	TRUE	TRUE	TRUE
A6NG10;K7EIJ0;K7EMC9;K7ENL2;Q969T9	TRUE	TRUE	TRUE
A6NG31	FALSE	FALSE	TRUE
A6NGA6;Q5H9D4;Q9Y5S8;Q9Y5S8-2;Q9Y5S8-3	TRUE	TRUE	TRUE
A6NGJ0;P51808	TRUE	TRUE	TRUE
A6NGL4;P0CW00	TRUE	TRUE	TRUE
A6NGN6;B1AJZ5;Q9NR34	FALSE	TRUE	TRUE
A6NGQ3;Q5VST9;Q5VST9-2;Q5VST9-6	TRUE	TRUE	TRUE
A6NGU5;B5MCK8;P19440	TRUE	TRUE	TRUE
A6NGW1;O95070	TRUE	TRUE	TRUE
A6NGY7;Q9H694-2	TRUE	TRUE	FALSE
A6NH11	TRUE	TRUE	TRUE
A6NHB5;A6NHN7;A6NL54;Q14202;Q14202-2;Q14202-3	FALSE	TRUE	FALSE
A6NHG8;Q13114	TRUE	TRUE	TRUE
A6NHJ8;A6NND8;C9JAL0;C9K0F7;H7C3I5;O95825;O95825-2	TRUE	TRUE	TRUE
A6NHR9;A6NHR9-2	TRUE	TRUE	TRUE
A6NI28;E9PJK4	TRUE	TRUE	TRUE
A6NI72;A8MVU1;C9J155;P14598;P14598-2	TRUE	TRUE	TRUE
A6NIH7	TRUE	TRUE	TRUE
A6NIT2;A6NMN0;P46020;P46020-2;P46020-3	TRUE	TRUE	TRUE
A6NIV6	TRUE	TRUE	TRUE
A6NIZ0;Q9GZM8;Q9GZM8-2;Q9GZM8-3	TRUE	TRUE	TRUE
A6NJA2;P54578;P54578-2;P54578-3	TRUE	TRUE	TRUE
A6NJZ7;A6NNM3;J3KP16;Q9UFD9	TRUE	FALSE	FALSE
A6NK44;H7C348	TRUE	TRUE	TRUE
A6NKB5-2	TRUE	TRUE	FALSE
A6NKD9	TRUE	TRUE	TRUE
A6NKN8	TRUE	TRUE	TRUE
A6NKZ2;P51606	TRUE	TRUE	TRUE
A6NLH6;Q9P003	TRUE	TRUE	TRUE
A6NLN1;P26599;P26599-2;P26599-3	TRUE	TRUE	TRUE
A6NLP5	TRUE	TRUE	TRUE
A6NMH6;Q92599;Q92599-2;Q92599-4	TRUE	TRUE	TRUE
A6NMH8;E9PIF1;E9PJK1;E9PRJ8;H0YDJ9;H0YDL9;P60033	FALSE	TRUE	TRUE
A6NML8;C9J6U3;O60879-2	TRUE	TRUE	TRUE
A6NMQ3;O43768;O43768-2;O43768-3;O43768-4;O43768-9;Q5T5H1	TRUE	TRUE	TRUE
A6NMV7	TRUE	TRUE	TRUE
A6NMZ5	TRUE	TRUE	TRUE
A6NMZ7;A6NMZ7-2	TRUE	TRUE	TRUE
A6NN50;O75147;O75147-1;O75147-2;O75147-4	TRUE	TRUE	TRUE
A6NN73	FALSE	TRUE	FALSE
A6NNK5;Q12888;Q12888-2;Q12888-3	TRUE	TRUE	TRUE
A6NP16;E7ERM3;Q4VCS5;Q4VCS5-2	TRUE	TRUE	TRUE
A6NP52;O60831	TRUE	TRUE	TRUE
A6PVD3;P48436;P56693;P56693-2;P57073	TRUE	TRUE	TRUE
A6PVK5	TRUE	TRUE	TRUE
A6PVP4;B7ZBQ1;B7ZBQ3;Q9H944;Q9H944-2	FALSE	TRUE	TRUE
A6PVU8;Q6UWW7;Q9NNX1;Q9NNX1-2;Q9NNX1-3	TRUE	TRUE	TRUE
A6PVY1;A6PVY2;A6PVY3;A6PVY3-2	TRUE	TRUE	TRUE
A6PW57;Q99755;Q99755-3;Q99755-4	TRUE	TRUE	TRUE
A6PWM2;Q6UXH1;Q6UXH1-2;Q6UXH1-3;Q6UXH1-4;Q6UXH1-5;Q6UXH1-6	TRUE	TRUE	TRUE
A6QRJ0;P49184	FALSE	TRUE	TRUE
A6XND0;A6XND1;B3KWK7;C9JMX4;H0Y5K2;P17936;P17936-2	TRUE	TRUE	TRUE
A7E2V4;A7E2V4-3;A7E2V4-4;A7E2V4-5;S4R393;S4R410	TRUE	TRUE	TRUE
A7KAX9;A7KAX9-2	TRUE	TRUE	TRUE
A7MCY6	TRUE	TRUE	TRUE
A7XZE4;Q3SX28	TRUE	TRUE	TRUE
A8CG34;A8CG34-2	TRUE	TRUE	TRUE
A8DPD7;Q9C0D3	TRUE	TRUE	TRUE
A8K7Q2	FALSE	TRUE	TRUE
A8K979;A8K979-2	FALSE	TRUE	FALSE
A8MPP7;A8MPY5;E7ETV6;Q9UPE1;Q9UPE1-2;Q9UPE1-3;Q9UPE1-4	TRUE	TRUE	TRUE
A8MQ02	TRUE	TRUE	TRUE
A8MQB8;G3V0J0;Q06787-2	TRUE	TRUE	TRUE
A8MSI8;D6RAR2;D6RFL2;J3KTA2	TRUE	TRUE	TRUE
A8MSY1;C9JYJ2;Q8IVN3	TRUE	TRUE	TRUE
A8MT69;A8MT69-2;A8MT69-3;J3QR01;J3QRS1	TRUE	FALSE	TRUE
A8MTF7;Q96EV2;Q96EV2-2	FALSE	TRUE	FALSE
A8MTT3	TRUE	TRUE	TRUE
A8MU21;Q9BVK8;Q9BVK8-2	FALSE	TRUE	TRUE
A8MUM1;Q53HC9	TRUE	TRUE	TRUE
A8MV81	FALSE	TRUE	TRUE
A8MVV6;E9PN41;E9PPX8;E9PSH3;J3KQ42;O14817	TRUE	TRUE	TRUE
A8MVZ6;Q96G01;Q96G01-3;Q96G01-4	TRUE	TRUE	TRUE
A8MWD9;F5H013;P62308;Q49AN9	TRUE	TRUE	TRUE
A8MXB7	TRUE	TRUE	TRUE
A8MXP9	FALSE	TRUE	TRUE
A8MXV4	TRUE	TRUE	TRUE
A8MYA3;J3KQ25;Q8N6M9	TRUE	TRUE	TRUE
A8MYU2;E5RHP1	FALSE	TRUE	TRUE
A8MYZ0	TRUE	TRUE	TRUE
A8TX70;A8TX70-2;E9PAL5	TRUE	TRUE	TRUE
A9J4F5;O00488	TRUE	TRUE	FALSE
A9X3U0;Q96GF1	TRUE	TRUE	TRUE
A9Z1X7;E9PCT1;Q8IYB3;Q8IYB3-2	TRUE	TRUE	TRUE
B0QY89;Q9Y262	TRUE	TRUE	TRUE
B0QY95;Q9NQG6	TRUE	TRUE	TRUE
B0QYF8;P02144	TRUE	TRUE	TRUE
B0QYK0;Q01844;Q01844-3;Q01844-5;Q01844-6	TRUE	TRUE	TRUE
B0QYN7;H3BQQ9;P63279	TRUE	TRUE	TRUE
B0QYP2;O95931	TRUE	TRUE	TRUE
B0QYW5;F6RTR7;O43808	TRUE	TRUE	TRUE
B0QZ18;F2Z2V0;Q99829	TRUE	TRUE	TRUE
B0QZA9;Q6QHF9;Q6QHF9-4	TRUE	FALSE	TRUE
B0YIW2;P02656	TRUE	TRUE	TRUE
B1AH77;B1AH80;P15153	FALSE	TRUE	TRUE
B1AH87;P30536	TRUE	TRUE	TRUE
B1AHA8;P09601	TRUE	TRUE	TRUE
B1AHB1	TRUE	TRUE	TRUE
B1AHL2;P23142;P23142-2;P23142-3;P23142-4	TRUE	TRUE	TRUE
B1AHR2	TRUE	TRUE	TRUE
B1AJQ6;Q86Y82	TRUE	TRUE	TRUE
B1AJS1;O14525;O14525-2;O14525-3	TRUE	TRUE	TRUE
B1AK53	TRUE	TRUE	TRUE
B1AK61;Q5VTY9;Q5VTY9-2;Q5VTY9-3;Q5VTY9-5;Q5VTY9-6;Q5VTY9-7	TRUE	TRUE	TRUE
B1AK88;P47756-2	TRUE	TRUE	TRUE
B1AKC9;P29323;P29323-2;P29323-3	TRUE	TRUE	TRUE
B1AKG0;Q03591	TRUE	TRUE	TRUE
B1AKI6;Q9NUK0;Q9NUK0-2	TRUE	TRUE	TRUE
B1AKL4;Q9NRA8;Q9NRA8-2;Q9NRA8-3	TRUE	TRUE	TRUE
B1AKR6;Q9NP97	TRUE	TRUE	TRUE
B1AL05;H0Y6Y8;Q8N983;Q8N983-2;Q8N983-3;Q8N983-4;Q8N983-6;Q8N983-7	TRUE	TRUE	TRUE
B1AL69;Q7L3B6	TRUE	TRUE	TRUE
B1ALA9;P60891	TRUE	TRUE	TRUE
B1ALD1;Q9Y6B7	TRUE	TRUE	TRUE
B1ALM5;Q9P0T7	TRUE	TRUE	TRUE
B1ALY0;Q8IXS6-2	TRUE	TRUE	TRUE
B1AM21	TRUE	TRUE	TRUE
B1AM27;O14795;O14795-2	TRUE	TRUE	TRUE
B1AM31;Q5T1B0	TRUE	FALSE	FALSE
B1AMI2	TRUE	TRUE	TRUE
B1AMN7;Q9P2B4	TRUE	TRUE	TRUE
B1AMS2;Q14141;Q14141-2;Q14141-4	TRUE	TRUE	TRUE
B1AMT9;B1AMU0;B1AMU5;Q969W1;Q969W1-2;Q969W1-3;Q969W1-4	TRUE	FALSE	TRUE
B1AMW1;H0YDI1;P19256;P19256-2;P19256-3	TRUE	TRUE	TRUE
B1ANE6	TRUE	TRUE	TRUE
B1ANH0;B1ANH2;Q16774;Q16774-2	TRUE	TRUE	TRUE
B1APN9;O75335	TRUE	TRUE	TRUE
B1APR7;Q99504;Q99504-2;Q99504-3;Q99504-4;Q99504-5	TRUE	TRUE	TRUE
B1AQK6;B1AQK7;E9PDR3;F6RH32;Q00975;Q00975-2	TRUE	TRUE	TRUE
B1AQP5;O75618;O75618-2;V9GY27	FALSE	TRUE	TRUE
B1AVT0;P49760;P49760-3	TRUE	TRUE	TRUE
B1AXG1;B4DG22;B7ZB17;P51812	TRUE	TRUE	TRUE
B1B0D4;Q86TH1	FALSE	FALSE	TRUE
B2RC85;B2RC85-2;H0YFY2;P0C881	TRUE	TRUE	TRUE
B2WTI3;B2WTI4;K7EJU9;Q6NYC1;Q6NYC1-2;Q6NYC1-3	TRUE	TRUE	TRUE
B3EWG3;B3EWG5;B3EWG6	TRUE	TRUE	TRUE
B3KP42	TRUE	TRUE	TRUE
B3KP96;H0Y626;J3QKY5;K7EL43;K7ENN8;O95361;O95361-2	TRUE	TRUE	TRUE
B3KS81	TRUE	TRUE	TRUE
B3KT41;Q496J9	TRUE	TRUE	TRUE
B3KTM8;H0YLJ3;Q9UBU8-2	TRUE	TRUE	TRUE
B3KUS5;Q70CQ3	TRUE	TRUE	TRUE
B3KVY5;F5GWA4;F5GWK6;F5H268;Q9H3F6;Q9H3F6-2;Q9H3F6-3	TRUE	TRUE	TRUE
B3KWA8;F8VZJ5;O43306;O43306-2;O95622;O95622-2	FALSE	TRUE	FALSE
B3KY94;O14735;O14735-3	TRUE	TRUE	TRUE
B4DDD6	TRUE	TRUE	TRUE
B4DDF4;B4DUT8;Q99439	TRUE	TRUE	TRUE
B4DDX3;H7C1L4;Q8TCB7	TRUE	TRUE	FALSE
B4DEE8;P16455	TRUE	TRUE	TRUE
B4DEN4;B8ZZ56;E7EV05;E9PFU9;Q8WV99;Q8WV99-2	TRUE	TRUE	TRUE
B4DFC0;E9PMV6;E9PR50;G3V1B4;H0YD20;H0YE53;H0YEL8;Q9UGK8;Q9UGK8-2	TRUE	TRUE	TRUE
B4DFG5;K7EMR4;K7EMW3;Q9BZJ4;Q9BZJ4-2	FALSE	TRUE	TRUE
B4DI03;K7EJQ7;Q9BY50	TRUE	TRUE	TRUE
B4DJ07	TRUE	TRUE	TRUE
B4DJ62;C9JM82;E7EPG2;E7EQM7;E7EX32;F8W9E5;G3XAH0;Q99719;Q99719-2	TRUE	TRUE	FALSE
B4DJC3	FALSE	TRUE	TRUE
B4DJV2;O75390	TRUE	TRUE	TRUE
B4DJV5;Q13610	TRUE	TRUE	TRUE
B4DK73	FALSE	TRUE	FALSE
B4DK77;Q9H6K4	TRUE	TRUE	TRUE
B4DL54	TRUE	TRUE	TRUE
B4DLJ1	TRUE	TRUE	TRUE
B4DLN1	TRUE	TRUE	TRUE
B4DLP0;B8ZZF7;O00338;O00338-2	TRUE	TRUE	TRUE
B4DR61;P61619	TRUE	TRUE	TRUE
B4DR80;Q9Y6E0;Q9Y6E0-2	TRUE	TRUE	TRUE
B4DTC4;C9J6H0;C9JAU4;C9JYH7;E7EX82;F8WDA4;G5E9U7;Q8NDX5;Q8NDX5-2;Q8NDX5-3;Q8NDX5-4;Q8NDX5-5;Q8NDX5-6;Q8NDX5-7	TRUE	FALSE	FALSE
B4DUC8;Q13126	TRUE	TRUE	TRUE
B4DUJ5;Q8IWP9	TRUE	TRUE	TRUE
[truncated: 7,229 more rows]

## Sheet: 05_I
Relocalization from HFHF-fed to HFHF-fasted
[truncated: 8,149 more rows]

[truncated: 7 more sheets: 05_J, 05_K, 05_L, 05_M, 05_N, 05_P, 05_Q]
