# Supplementary material for: C-COMPASS: a user-friendly neural network tool profiles cell compartments at protein and lipid levels
Source: Nat Methods. 2025 Dec 4;23(1):118–30. doi: 10.1038/s41592-025-02880-3 (PMC12791020; doi:10.1038/s41592-025-02880-3)
Supplement: Supplementary file 22 — Liver spatial lipidomics. [file 41592_2025_2880_MOESM22_ESM.xlsx]

## Sheet: 06_B
class	lipidomics_median_Fr.1_mean	lipidomics_median_Fr.1_std	lipidomics_median_Fr.2_mean	lipidomics_median_Fr.2_std	lipidomics_median_Fr.3_mean	lipidomics_median_Fr.3_std	lipidomics_median_Fr.4_mean	lipidomics_median_Fr.4_std	lipidomics_median_Fr.5_mean	lipidomics_median_Fr.5_std	lipidomics_median_Fr.6_mean	lipidomics_median_Fr.6_std	lipidomics_median_Fr.7_mean	lipidomics_median_Fr.7_std	lipidomics_median_Fr.8_mean	lipidomics_median_Fr.8_std	lipidomics_median_Fr.9_mean	lipidomics_median_Fr.9_std	lipidomics_median_Fr.10_mean	lipidomics_median_Fr.10_std	lipidomics_median_Fr.11_mean	lipidomics_median_Fr.11_std	lipidomics_median_Fr.12_mean	lipidomics_median_Fr.12_std	lipidomics_median_Fr.13_mean	lipidomics_median_Fr.13_std	lipidomics_median_Fr.14_mean	lipidomics_median_Fr.14_std
Cytosol	0.0656601	0.101947	0.898898	0.25665	0.135355	0.122398	0.502338	0.234046	0.379227	0.195161	0.383808	0.235299	0.236719	0.188348	0.276591	0.276535	0.120265	0.158557	0.0733949	0.13221	0.0517372	0.126273	0.0160775	0.0522796	0.0537748	0.0860628	0.0671445	0.186849
Endosome	0.133355	0.168445	0.343633	0.395162	0.143228	0.16364	0.348669	0.262959	0.458596	0.242035	0.777999	0.256871	0.585141	0.208324	0.704261	0.30979	0.381436	0.217335	0.216591	0.221799	0.147713	0.198854	0.0504923	0.104677	0.062508	0.0765595	0.0490465	0.118635
ER	0.0903803	0.113244	0.032284	0.148919	0.120794	0.101064	0.0495655	0.114823	0.096639	0.106334	0.3125	0.186347	0.464123	0.200282	0.879723	0.25411	0.64624	0.220403	0.533379	0.228507	0.489138	0.260203	0.268347	0.166874	0.416009	0.280476	0.263333	0.218985
Golgi	0.649044	0.385407	0.135415	0.291196	0.571689	0.351168	0.285119	0.266715	0.251065	0.215033	0.366992	0.280981	0.302074	0.241166	0.425445	0.383573	0.240432	0.245483	0.11568	0.175335	0.0945141	0.167823	0.0375305	0.0801422	0.0633144	0.101062	0.0514108	0.15068
LD	0.610568	0.426411	0.185286	0.244709	0.118896	0.11712	0.0694196	0.0951594	0.095241	0.111164	0.263529	0.176555	0.356411	0.251078	0.6079	0.368432	0.431848	0.29845	0.377162	0.350368	0.308688	0.323152	0.145862	0.156724	0.16949	0.163919	0.0620401	0.0888355
Lysosome	0.11319	0.0956167	0.0144042	0.0793663	0.218027	0.175641	0.0629186	0.0939513	0.0996932	0.133751	0.261183	0.204354	0.399251	0.216899	0.886255	0.270456	0.655952	0.238917	0.384167	0.206772	0.254737	0.168342	0.0966936	0.0784548	0.193731	0.163935	0.468059	0.350764
Mitochondria	0.0714487	0.0954693	0.0580871	0.192243	0.172077	0.147339	0.027982	0.0926911	0.0250232	0.0634865	0.0470044	0.0944426	0.0477164	0.0858469	0.102978	0.133578	0.100178	0.102823	0.615563	0.217102	0.943271	0.196747	0.465906	0.159002	0.434185	0.191839	0.0967619	0.102452
Nucleus	0.0253026	0.0392355	0.114124	0.244182	0.0361888	0.0491229	0.0722984	0.153074	0.0692056	0.107784	0.110207	0.153077	0.0875893	0.110281	0.163742	0.228745	0.0849983	0.135345	0.0519358	0.103222	0.0577601	0.129056	0.0240627	0.0565487	0.132076	0.111066	0.935789	0.211498
Peroxisome	0.0422498	0.0584411	0.247036	0.280451	0.166239	0.0740143	0.104305	0.149542	0.0760133	0.0911163	0.1414	0.106912	0.129141	0.0827358	0.339585	0.147024	0.374814	0.13733	0.831613	0.161075	0.933346	0.167833	0.548743	0.154818	0.810504	0.205422	0.190272	0.146677
PM	0.190347	0.154941	0.0543029	0.183067	0.286386	0.202007	0.0619258	0.0986769	0.115798	0.107996	0.314608	0.204927	0.368241	0.179005	0.899505	0.236586	0.738934	0.213403	0.61932	0.279588	0.513787	0.260814	0.249964	0.166545	0.16004	0.131669	0.123874	0.132934

## Sheet: 06_C
feature	CC_Cytosol	CC_ER	CC_Golgi	CC_Lysosome	CC_Mitochondria	CC_Nucleus	CC_Peroxisome	CC_PM	CC_Endosome	CC_LD
TAG 58:9;0	0	0	0	0	0	0	0	0	0.564206	0.435794
SM 42:2;2	0	0	0	0	0	0	0	0	1	0
SM 42:1;2	0	0	0	0	0	0	0	0	1	0
SM 39:1;3	0	0	0	0	0	0	0	0	1	0
SM 40:1;2	0	0	0	0	0	0	0	0	1	0
SM 36:2;3	0.437978	0	0	0	0	0.562022	0	0	0	0
SM 34:1;2	0	0	0	0	0	1	0	0	0	0
PC 16:0;0_16:1;0	0	0	0	0	0	1	0	0	0	0
PC 16:0;0_16:0;0	0	0	0	0	0	1	0	0	0	0
LPE 16:0;0	0	0	0	0	0	1	0	0	0	0
LPC 18:0;0	0	0	0	0	0	1	0	0	0	0
Chol	0	0	0	0	0	1	0	0	0	0
DAG 16:0;0_18:2;0	0	0	0	0	0	1	0	0	0	0
DAG 16:0;0_20:1;0	0	0	0.489947	0.510053	0	0	0	0	0	0
PG 18:1;0_18:1;0	0	0	0	0.588703	0	0.411297	0	0	0	0
PS 16:0;0_22:6;0	0	0	0	1	0	0	0	0	0	0
LPS 22:6;0	0.735636	0	0.264364	0	0	0	0	0	0	0
DAG 16:0;0_16:0;0	0.751498	0	0.248502	0	0	0	0	0	0	0
CE 16:1;0	0.764151	0	0.235849	0	0	0	0	0	0	0
TAG 52:1;0	0.766418	0	0.233582	0	0	0	0	0	0	0
CE 18:0;0	0.573028	0	0.426972	0	0	0	0	0	0	0
DAG 18:1;0_18:1;0	0.704622	0	0.295378	0	0	0	0	0	0	0
TAG 40:0;0	0.688961	0	0.311039	0	0	0	0	0	0	0
TAG 46:3;0	0.689044	0	0.310956	0	0	0	0	0	0	0
CE 18:1;0	0.646745	0	0.353255	0	0	0	0	0	0	0
DAG 16:1;0_18:1;0	0.660989	0	0.339011	0	0	0	0	0	0	0
DAG 14:0;0_18:1;0	0.658778	0	0.341222	0	0	0	0	0	0	0
DAG 16:0;0_16:1;0	0.656542	0	0.343458	0	0	0	0	0	0	0
LPC 18:1;0	0.657461	0	0.342539	0	0	0	0	0	0	0
DAG 16:0;0_18:1;0	0.629508	0	0.370492	0	0	0	0	0	0	0
TAG 54:7;0	0.61748	0	0.38252	0	0	0	0	0	0	0
TAG 52:4;0	0.333592	0	0.466493	0	0	0	0	0	0	0.199916
TAG 44:1;0	0.352601	0	0.472224	0	0	0	0	0	0	0.175175
TAG 53:3;0	0.338583	0	0.487673	0	0	0	0	0	0	0.173744
TAG 51:2;0	0.342681	0	0.473581	0	0	0	0	0	0	0.183738
TAG 56:2;0	0.339998	0	0.473206	0	0	0	0	0	0	0.186796
TAG 52:2;0	0.33332	0	0.478336	0	0	0	0	0	0	0.188344
TAG 54:2;0	0.331021	0	0.483282	0	0	0	0	0	0	0.185697
TAG 56:3;0	0.356447	0	0.435613	0	0	0	0	0	0	0.20794
TAG 46:1;0	0.369148	0	0.457285	0	0	0	0	0	0	0.173567
TAG 48:1;0	0.369744	0	0.45375	0	0	0	0	0	0	0.176506
TAG 50:2;0	0.369884	0	0.451407	0	0	0	0	0	0	0.178709
TAG 48:2;0	0.376367	0	0.443426	0	0	0	0	0	0	0.180207
TAG 50:1;0	0.383832	0	0.440586	0	0	0	0	0	0	0.175582
TAG 54:1;0	0.375547	0	0.42707	0	0	0	0	0	0	0.197383
TAG 50:3;0	0.389411	0	0.423944	0	0	0	0	0	0	0.186645
TAG 52:3;0	0.390446	0	0.427773	0	0	0	0	0	0	0.181781
TAG 46:2;0	0.386318	0	0.427713	0	0	0	0	0	0	0.185968
TAG 54:3;0	0.38612	0	0.43044	0	0	0	0	0	0	0.183439
TAG 42:0;0	0.459538	0	0.35938	0	0	0	0	0	0	0.181081
TAG 46:0;0	0.453886	0	0.345262	0	0	0	0	0	0	0.200852
TAG 54:6;0	0.437281	0	0.357633	0	0	0	0	0	0	0.205085
TAG 56:6;0	0.445787	0	0.361012	0	0	0	0	0	0	0.193201
TAG 44:0;0	0.422652	0	0.374593	0	0	0	0	0	0	0.202755
TAG 56:5;0	0.424914	0	0.373037	0	0	0	0	0	0	0.202049
TAG 52:5;0	0.417319	0	0.375227	0	0	0	0	0	0	0.207454
TAG 54:5;0	0.413749	0	0.373149	0	0	0	0	0	0	0.213103
TAG 54:4;0	0.408229	0	0.399963	0	0	0	0	0	0	0.191808
TAG 48:3;0	0.421228	0	0.385652	0	0	0	0	0	0	0.19312
TAG 50:4;0	0.420559	0	0.392272	0	0	0	0	0	0	0.187169
TAG 56:4;0	0.420518	0	0.390574	0	0	0	0	0	0	0.188907
TAG 56:8;0	0.499557	0	0.286678	0	0	0	0	0	0	0.213765
TAG 48:0;0	0.464379	0	0.319195	0	0	0	0	0	0	0.216427
TAG 56:7;0	0.49358	0	0.324845	0	0	0	0	0	0	0.181575
DAG 18:1;0_20:1;0	0.460633	0	0.539367	0	0	0	0	0	0	0
TAG 44:2;0	0.457691	0	0.542309	0	0	0	0	0	0	0
TAG 49:1;0	0.421498	0	0.578502	0	0	0	0	0	0	0
TAG 53:2;0	0.434075	0	0.565925	0	0	0	0	0	0	0
CE 16:0;0	0.389228	0	0.610772	0	0	0	0	0	0	0
TAG 42:1;0	0.32527	0	0.67473	0	0	0	0	0	0	0
TAG 48:4;0	0.349713	0	0.650287	0	0	0	0	0	0	0
CE 17:1;0	0.620873	0	0	0	0	0	0	0	0.379127	0
TAG 56:1;0	0.647562	0	0	0	0	0	0	0	0	0.352438
TAG 50:0;0	1	0	0	0	0	0	0	0	0	0
DAG 18:1;0_18:2;0	1	0	0	0	0	0	0	0	0	0
DAG 18:0;0_18:1;0	1	0	0	0	0	0	0	0	0	0
CE 18:2;0	1	0	0	0	0	0	0	0	0	0
CE 20:4;0	1	0	0	0	0	0	0	0	0	0
DAG 16:0;0_18:0;0	0.839284	0	0	0	0	0.160716	0	0	0	0
SM 29:1;3	0.844096	0	0	0	0	0.155904	0	0	0	0
SM 38:3;2	0.726101	0	0	0	0	0.273899	0	0	0	0
SM 29:0;2	0.774965	0	0	0	0	0.225035	0	0	0	0
SM 37:1;2	0.774965	0	0	0	0	0.225035	0	0	0	0
SM 43:3;2	0	0	0.157331	0	0	0	0	0	0	0.842669
SM 39:3;2	0	0	0.242138	0	0	0	0	0	0	0.757862
TAG 51:4;0	0	0	0.218846	0	0	0	0	0	0	0.781154
TAG 36:0;0	0	0	0.431885	0	0	0	0	0	0	0.568115
TAG 55:3;0	0	0	0.435711	0	0	0	0	0	0	0.564289
TAG 55:4;0	0	0	0.36265	0	0	0	0	0	0	0.63735
TAG 58:4;0	0	0	0.370951	0	0	0	0	0	0	0.629049
TAG 45:1;0	0	0	0.503978	0	0	0	0	0	0	0.496022
TAG 49:3;0	0	0	0.507517	0	0	0	0	0	0	0.492483
TAG 44:3;0	0	0	0.629411	0	0	0	0	0	0	0.370589
TAG 58:5;0	0	0	0.583511	0	0	0	0	0	0	0.416489
LPA 20:2;0	0	0	0.330468	0	0	0.387513	0	0	0	0.282018
LPC 16:0;0	0	0	0.46303	0	0	0.53697	0	0	0	0
LPC 18:2;0	0	0	0.533575	0	0	0.466425	0	0	0	0
DAG 12:0;0_18:1;0	0	0	0.57981	0	0	0	0	0	0.42019	0
DAG 14:0;0_16:1;0	0	0	0.463293	0	0	0	0	0	0.536707	0
LPC 20:3;0	0	0	0.741586	0	0.258414	0	0	0	0	0
LPC 22:6;0	0	0	0.535142	0	0.464858	0	0	0	0	0
TAG 58:8;0	0	0	1	0	0	0	0	0	0	0
TAG 58:7;0	0	0	1	0	0	0	0	0	0	0
TAG 58:3;0	0	0	1	0	0	0	0	0	0	0
TAG 53:4;0	0	0	1	0	0	0	0	0	0	0
TAG 52:6;0	0	0	1	0	0	0	0	0	0	0
TAG 51:3;0	0	0	1	0	0	0	0	0	0	0
TAG 51:1;0	0	0	1	0	0	0	0	0	0	0
TAG 50:6;0	0	0	1	0	0	0	0	0	0	0
TAG 50:5;0	0	0	1	0	0	0	0	0	0	0
TAG 40:1;0	0	0	1	0	0	0	0	0	0	0
LPC 20:4;0	0	0	1	0	0	0	0	0	0	0
LPC 16:1;0	0	0	1	0	0	0	0	0	0	0
DAG 18:2;0_18:2;0	0	0	1	0	0	0	0	0	0	0
DAG 18:1;0_18:3;0	0	0	1	0	0	0	0	0	0	0
DAG 16:1;0_18:2;0	0	0	1	0	0	0	0	0	0	0
DAG 16:1;0_16:1;0	0	0	1	0	0	0	0	0	0	0
DAG 14:1;0_16:0;0	0	0	1	0	0	0	0	0	0	0
DAG 14:0;0_16:0;0	0	0	1	0	0	0	0	0	0	0
DAG 14:0;0_18:2;0	0	0	1	0	0	0	0	0	0	0
SM 41:3;2	0	0	0.744369	0	0	0	0	0	0	0.255631
TAG 49:2;0	0	0	0.740082	0	0	0	0	0	0	0.259918
TAG 47:1;0	0	0	0.77429	0	0	0	0	0	0	0.22571
TAG 38:0;0	0	0	0.76556	0	0	0	0	0	0	0.23444
TAG 42:2;0	0	0	0.769399	0	0	0	0	0	0	0.230601
TAG 47:2;0	0	0	0.789761	0	0	0	0	0	0	0.210239
TAG 58:6;0	0	0	0.800203	0	0	0	0	0	0	0.199797
LPG 16:0;0	0	0	0.193197	0	0.491037	0	0.315766	0	0	0
LPS 18:0;0	0	0	0	0	0.611039	0	0.388961	0	0	0
PS 18:2;0_20:3;0	0	0	0	0	0.612838	0	0.387162	0	0	0
PE 18:0;0_20:5;0	0	0	0	0	0.582968	0	0.417032	0	0	0
PC 16:1;0_20:3;0	0	0	0	0	0.566693	0	0.433307	0	0	0
PE 18:2;0_18:2;0	0	0	0	0	0.573269	0	0.426731	0	0	0
PG 16:0;0_18:1;0	0	0	0	0	0.57278	0	0.42722	0	0	0
PC 18:1;0_20:1;0	0	0	0	0	0.243955	0	0.756045	0	0	0
LPE 20:4;0	0	0	0	0	0.199027	0	0.800973	0	0	0
DAG 18:0;0_20:4;0	0	0	0	0	0.167127	0	0.832873	0	0	0
PE 16:0;0_20:4;0	0	0	0	0	0.160717	0	0.839283	0	0	0
LPI 20:4;0	0	0	0	0	0.417558	0	0.582442	0	0	0
PC 20:4;0_20:4;0	0	0	0	0	0.433461	0	0.566539	0	0	0
PG 16:0;0_18:2;0	0	0	0	0	0.37651	0	0.62349	0	0	0
PC 20:1;0_20:4;0	0	0	0	0	0.332872	0	0.667128	0	0	0
PE 18:0;0_20:4;0	0	0	0	0	0.343444	0	0.656556	0	0	0
PI 20:0;0_20:4;0	0	0	0	0	0	0	1	0	0	0
PE 18:1;0_20:3;0	0	0	0	0	0	0	1	0	0	0
PE 18:0;0_22:6;0	0	0	0	0	0	0	1	0	0	0
PE 18:0;0_22:5;0	0	0	0	0	0	0	1	0	0	0
PE 18:0;0_18:2;0	0	0	0	0	0	0	1	0	0	0
PE 16:0;0_22:6;0	0	0	0	0	0	0	1	0	0	0
PE 16:0;0_22:5;0	0	0	0	0	0	0	1	0	0	0
PE 16:0;0_20:3;0	0	0	0	0	0	0	1	0	0	0
PE 16:0;0_18:2;0	0	0	0	0	0	0	1	0	0	0
PE 16:0;0_18:1;0	0	0	0	0	0	0	1	0	0	0
DAG 18:0;0_18:2;0	0	0	0	0	0	0	1	0	0	0
PC 16:0;0_20:2;0	0	0	0	0	0	0	1	0	0	0
PC 18:0;0_18:1;0	0	0	0	0	0	0.477361	0.522639	0	0	0
PC 18:1;0_18:2;0	0	0	0	0	0	0.273239	0.726761	0	0	0
LPE 18:0;0	0	0	0	0	0	0.26983	0.73017	0	0	0
PC 16:0;0_22:6;0	0	0	0	0	0	0.266082	0.733918	0	0	0
PC 18:0;0_20:4;0	0	0	0	0	0	0.266856	0.733144	0	0	0
PC 16:0;0_18:1;0	0	0	0	0	0	0.251387	0.748613	0	0	0
PC 16:0;0_20:4;0	0	0	0	0	0	0.260064	0.739936	0	0	0
PC 18:0;0_20:3;0	0	0	0	0	0	0.306147	0.693853	0	0	0
PC 16:0;0_18:2;0	0	0	0	0	0	0.308461	0.691539	0	0	0
PC 18:1;0_18:1;0	0	0	0	0	0	0.308478	0.691522	0	0	0
PC 16:0;0_20:3;0	0	0	0	0	0	0.285069	0.714931	0	0	0
PC 18:1;0_20:4;0	0	0	0	0	0	0.286885	0.713115	0	0	0
LPI 18:0;0	0	0	0	0	0	0.29978	0.70022	0	0	0
PC 18:1;0_20:3;0	0	0	0	0	0	0.29319	0.70681	0	0	0
PI 16:0;0_20:4;0	0	0	0	0	0	0.344175	0.655825	0	0	0
PC 16:0;0_22:5;0	0	0	0	0	0	0.319495	0.680505	0	0	0
PI 18:0;0_20:3;0	0	0	0	0	0	0.318934	0.681066	0	0	0
PC 18:0;0_18:2;0	0	0	0	0	0	0.3274	0.6726	0	0	0
PI 18:0;0_20:4;0	0	0	0	0	0	0.331231	0.668769	0	0	0
PC 18:0;0_22:6;0	0	0.387909	0	0	0	0.196139	0.415952	0	0	0
DAG 16:0;0_20:4;0	0	0.45337	0	0	0	0.145347	0.401283	0	0	0
PE 18:0;0_20:3;0	0	0.40459	0	0	0	0.151627	0.443782	0	0	0
PE 18:1;0_18:1;0	0	0.419143	0	0	0	0.153206	0.427651	0	0	0
PI 18:1;0_18:2;0	0	0.61427	0	0	0	0	0.38573	0	0	0
PC 16:1;0_22:6;0	0	0.609585	0	0	0	0	0.390415	0	0	0
PE 16:1;0_22:6;0	0	0.607712	0	0	0	0	0.392288	0	0	0
PC 16:0;0_18:3;0	0	0.638923	0	0	0	0	0.361077	0	0	0
PI 18:1;0_20:3;0	0	0.646323	0	0	0	0	0.353677	0	0	0
PI 16:0;0_20:3;0	0	0.496569	0	0	0	0	0.503431	0	0	0
PC 16:1;0_18:2;0	0	0.490106	0	0	0	0	0.509894	0	0	0
PE 18:0;0_18:1;0	0	0.487074	0	0	0	0	0.512926	0	0	0
PE 16:1;0_20:4;0	0	0.478377	0	0	0	0	0.521623	0	0	0
PE 18:1;0_18:2;0	0	0.466426	0	0	0	0	0.533574	0	0	0
PE 18:1;0_22:5;0	0	0.562418	0	0	0	0	0.437582	0	0	0
PC 18:2;0_20:3;0	0	0.566854	0	0	0	0	0.433146	0	0	0
PI 18:1;0_18:1;0	0	0.56536	0	0	0	0	0.43464	0	0	0
PC 16:0;0_22:4;0	0	0.594019	0	0	0	0	0.405981	0	0	0
PC 18:1;0_20:2;0	0	0.581916	0	0	0	0	0.418084	0	0	0
PI 18:0;0_18:2;0	0	0.582981	0	0	0	0	0.417019	0	0	0
PC 16:1;0_20:4;0	0	0.53636	0	0	0	0	0.46364	0	0	0
PC 18:1;0_22:6;0	0	0.536003	0	0	0	0	0.463997	0	0	0
PI 18:2;0_18:2;0	0	0.548303	0	0	0	0	0.451697	0	0	0
PC 16:1;0_18:0;0	0	0.545156	0	0	0	0	0.454844	0	0	0
PE 16:0;0_20:5;0	0	0.542112	0	0	0	0	0.457888	0	0	0
PE 16:1;0_18:1;0	0	0.509177	0	0	0	0	0.490823	0	0	0
PE 18:1;0_20:5;0	0	0.523654	0	0	0	0	0.476346	0	0	0
DAG 16:0;0_20:3;0	0	0.391965	0	0	0	0	0.608035	0	0	0
PE 18:1;0_20:4;0	0	0.383312	0	0	0	0	0.616688	0	0	0
PC 18:2;0_20:4;0	0	0.432683	0	0	0	0	0.567317	0	0	0
PE O-22:0;0/16:0;0	0	0.40657	0	0	0	0	0.59343	0	0	0
PC 18:1;0_22:5;0	0	0.424366	0	0	0	0	0.575634	0	0	0
PC 18:2;0_18:2;0	0	0.416413	0	0	0	0	0.583587	0	0	0
PE 18:1;0_22:6;0	0	0.418041	0	0	0	0	0.581959	0	0	0
PE 18:2;0_20:4;0	0	0.364203	0	0	0.174412	0	0.461385	0	0	0
PE 16:0;0_16:1;0	0	0.392812	0	0	0.105206	0	0.501983	0	0	0
PE 20:1;0_20:4;0	0	0.457289	0	0	0.113729	0	0.428982	0	0	0
PC 18:0;0_18:3;0	0	0.424241	0	0	0.126244	0	0.449516	0	0	0
PE 16:1;0_18:0;0	0	0.439626	0	0	0.104559	0	0.455815	0	0	0
DAG 18:1;0_22:6;0	0	0.33105	0	0.203128	0	0	0	0.295919	0	0.169904
PC 14:0;0_18:2;0	0	0.48354	0	0.27135	0	0	0	0.24511	0	0
LPG 18:1;0	0	0.3996	0	0.254069	0	0	0	0.346332	0	0
PA 18:0;0_20:4;0	0	0.397564	0	0.28392	0	0	0	0.318517	0	0
PG 18:1;0_18:2;0	0	0.394055	0	0.285006	0	0	0	0.320939	0	0
Cer 41:2;2	0	0.365594	0	0	0	0	0	0.634406	0	0
PE O-16:1;0/22:5;0	0	0.365782	0	0	0	0	0	0.634218	0	0
PC 14:0;0_16:0;0	0	0.37016	0	0	0.167653	0	0	0.462187	0	0
PC 16:0;0_17:1;0	0	0.47419	0	0	0.224697	0	0	0.301113	0	0
PC 18:0;0_22:4;0	0	0.410602	0	0	0	0	0	0.386521	0	0.202878
Cer 42:3;2	0	0.504119	0	0	0	0	0	0.495881	0	0
PS 18:2;0_20:4;0	0	0.651522	0	0	0	0	0	0.348478	0	0
LPE O-14:1;0	0	0.633771	0	0	0	0	0	0.366229	0	0
PE 16:1;0_18:2;0	0	0.638628	0	0	0	0	0	0.361372	0	0
PA 18:1;0_18:2;0	0	0.609189	0	0.390811	0	0	0	0	0	0
PG 18:1;0_22:6;0	0	0.603574	0	0.396426	0	0	0	0	0	0
PC 16:1;0_16:1;0	0	0.432951	0	0	0.329145	0	0	0	0	0.237903
Cer 39:1;2	0	0.790196	0	0	0.209804	0	0	0	0	0
DAG 16:1;0_18:0;0	0	0.76368	0	0	0.23632	0	0	0	0	0
PA 18:0;0_18:2;0	0	0.50424	0	0	0.49576	0	0	0	0	0
PC 18:2;0_20:1;0	0	0.57982	0	0	0.42018	0	0	0	0	0
PC 18:0;0_20:5;0	0	0.671356	0	0	0.328644	0	0	0	0	0
PI 16:0;0_18:2;0	0	0.637562	0	0	0.362438	0	0	0	0	0
PE O-16:1;0/20:4;0	0	0.772496	0	0	0	0.227504	0	0	0	0
PI 18:0;0_22:4;0	0	0.805735	0	0	0	0.194265	0	0	0	0
PG 20:3;0_20:4;0	0	0.593763	0	0	0	0.406237	0	0	0	0
PC 16:0;0_20:1;0	0	0.652269	0	0	0	0.347731	0	0	0	0
PI 16:0;0_18:1;0	0	0.665614	0	0	0	0.334386	0	0	0	0
PC 16:1;0_18:1;0	0	0.725391	0	0	0	0.274609	0	0	0	0
PI 18:1;0_20:4;0	0	0.705685	0	0	0	0.294315	0	0	0	0
PC 16:0;0_20:5;0	0	0.707662	0	0	0	0	0	0	0	0.292338
PS 18:1;0_20:4;0	0	1	0	0	0	0	0	0	0	0
PS 18:0;0_18:2;0	0	1	0	0	0	0	0	0	0	0
PS 16:0;0_20:4;0	0	1	0	0	0	0	0	0	0	0
PI 18:0;0_22:5;0	0	1	0	0	0	0	0	0	0	0
PG 18:0;0_18:2;0	0	1	0	0	0	0	0	0	0	0
PG 16:1;0_18:1;0	0	1	0	0	0	0	0	0	0	0
PE 18:1;0_20:1;0	0	1	0	0	0	0	0	0	0	0
PE 18:0;0_22:4;0	0	1	0	0	0	0	0	0	0	0
PE 18:0;0_20:2;0	0	1	0	0	0	0	0	0	0	0
PE 16:0;0_22:4;0	0	1	0	0	0	0	0	0	0	0
PE 16:0;0_20:1;0	0	1	0	0	0	0	0	0	0	0
PC 18:0;0_22:5;0	0	1	0	0	0	0	0	0	0	0
PC 14:0;0_18:1;0	0	1	0	0	0	0	0	0	0	0
PA 18:1;0_18:1;0	0	1	0	0	0	0	0	0	0	0
PA 16:1;0_18:1;0	0	1	0	0	0	0	0	0	0	0
PA 16:0;0_18:1;0	0	1	0	0	0	0	0	0	0	0
DAG 18:1;0_20:4;0	0	1	0	0	0	0	0	0	0	0
DAG 16:0;0_22:6;0	0	1	0	0	0	0	0	0	0	0
Cer 34:1;2	0	1	0	0	0	0	0	0	0	0
Cer 38:1;2	0	1	0	0	0	0	0	0	0	0
SM 41:1;2	0	0	0	0	0	0	0	1	0	0
PS 18:1;0_18:1;0	0	0	0	0	0	0	0	1	0	0
PS 18:0;0_22:4;0	0	0	0	0	0	0	0	1	0	0
PG 20:4;0_20:4;0	0	0	0	0	0	0	0	1	0	0
PG 18:0;0_20:4;0	0	0	0	0	0	0	0	1	0	0
PG 18:0;0_18:1;0	0	0	0	0	0	0	0	1	0	0
PE O-16:1;0/22:6;0	0	0	0	0	0	0	0	1	0	0
PC 17:0;0_18:2;0	0	0	0	0	0	0	0	1	0	0
HexCer 40:1;2	0	0	0	0	0	0	0	1	0	0
PC 15:0;0_18:2;0	0	0	0	0	0	0	0	1	0	0
PG 16:1;0_18:2;0	0	0	0	0	0	0.396169	0	0.603831	0	0
PS 18:0;0_18:1;0	0	0	0	0	0	0.409057	0	0.590943	0	0
PG 16:1;0_22:6;0	0	0	0	0.61618	0	0	0	0.38382	0	0
PG 18:1;0_20:3;0	0	0	0	0.433506	0	0	0	0.566494	0	0
PG 18:1;0_20:4;0	0	0	0	0.455562	0	0	0	0.544438	0	0
PE 18:1;0_20:2;0	0	0	0	0.447756	0	0	0	0.552244	0	0
PG 18:1;0_22:5;0	0	0	0	0.444634	0	0	0	0.555366	0	0
PG 22:6;0_22:6;0	0	0	0	0.369784	0	0	0	0.630216	0	0
PA 16:0;0_16:1;0	0	0	0	0.40104	0	0	0	0.59896	0	0
PG 18:2;0_22:6;0	0	0	0	0.386037	0	0	0	0.613963	0	0
DAG 18:1;0_20:3;0	0	0	0.294652	0	0	0	0	0.382609	0	0.322739
PS 18:0;0_20:3;0	0	0	0	0	0	0	0	0.532475	0	0.467525
TAG 58:10;0	0	0	0	0	0	0	0	0.547038	0	0.452962
PE O-18:1;0/20:4;0	0	0	0	0	0.284515	0	0	0.470139	0	0.245346
PE O-18:2;0/20:4;0	0	0	0	0	0.156759	0	0	0.543424	0	0.299817
SM 40:2;2	0	0	0	0	0.209265	0	0	0.561506	0	0.229229
PG 16:1;0_20:3;0	0	0	0.208432	0	0	0	0.392181	0.399388	0	0
PG 18:2;0_18:2;0	0	0	0.20888	0	0	0	0.393264	0.397855	0	0
DAG 16:1;0_20:1;0	0	0	0.566258	0	0	0	0	0.433742	0	0
PA 14:0;0_18:1;0	0	0	0.394633	0	0	0	0	0.605367	0	0
PG 16:1;0_18:0;0	0	0	0.302863	0	0	0	0	0.697137	0	0
PI 18:2;0_20:4;0	0	0	0.305266	0	0.694734	0	0	0	0	0
PI 18:0;0_20:2;0	0	0	0	0	0.840931	0.159069	0	0	0	0
PE O-20:1;0/20:4;0	0	0	0	0	1	0	0	0	0	0
PE O-18:1;0/22:4;0	0	0	0	0	1	0	0	0	0	0
PE 20:0;0_20:4;0	0	0	0	0	1	0	0	0	0	0
PE 19:0;0_20:4;0	0	0	0	0	1	0	0	0	0	0
PE 18:2;0_22:6;0	0	0	0	0	1	0	0	0	0	0
PE 17:0;0_20:4;0	0	0	0	0	1	0	0	0	0	0
PE 16:1;0_20:3;0	0	0	0	0	1	0	0	0	0	0
PC 20:3;0_20:4;0	0	0	0	0	1	0	0	0	0	0
PC 16:1;0_17:0;0	0	0	0	0	1	0	0	0	0	0
PC 15:0;0_18:1;0	0	0	0	0	1	0	0	0	0	0
PA 16:0;0_18:2;0	0	0	0	0	1	0	0	0	0	0
CL 74:9;0	0	0	0	0	1	0	0	0	0	0
CL 74:8;0	0	0	0	0	1	0	0	0	0	0
CL 72:8;0	0	0	0	0	1	0	0	0	0	0
CL 72:7;0	0	0	0	0	1	0	0	0	0	0
CL 72:6;0	0	0	0	0	1	0	0	0	0	0
CL 70:7;0	0	0	0	0	1	0	0	0	0	0
CL 70:6;0	0	0	0	0	1	0	0	0	0	0
CL 70:5;0	0	0	0	0	1	0	0	0	0	0
CL 68:5;0	0	0	0	0	1	0	0	0	0	0
CL 70:4;0	0	0	0	0	1	0	0	0	0	0
PC 14:0;0_18:0;0	0	0	0	0	0.638499	0	0	0.361501	0	0
PE 22:6;0_22:6;0	0	0	0	0	0.662117	0	0	0.337883	0	0
PE O-18:2;0/20:3;0	0	0	0	0	0.671671	0	0	0.328329	0	0
PG 16:0;0_16:1;0	0	0	0	0	0.768008	0	0	0.231992	0	0
PE 20:4;0_20:4;0	0	0	0	0	0.720295	0	0	0.279705	0	0
PG 18:0;0_22:6;0	0	0	0	0	0.718733	0	0	0.281267	0	0
PC 18:2;0_22:6;0	0	0	0	0	0.737011	0	0	0.262989	0	0
PE 18:2;0_20:1;0	0	0	0	0	0.732226	0	0	0.267774	0	0
LPE 18:2;0	0	0	0.263685	0	0.382621	0	0	0.353695	0	0
PI 18:0;0_22:6;0	0	0	0.206632	0	0.347284	0	0	0.446084	0	0
PC 17:0;0_18:1;0	0	0	0	0	0.551037	0	0	0.448963	0	0
PE 18:0;0_18:3;0	0	0	0	0	0.50904	0	0	0.49096	0	0
PE 18:0;0_20:1;0	0	0	0	0	0.510278	0	0	0.489722	0	0
PE 16:0;0_18:3;0	0	0	0	0	0.412888	0	0	0.587112	0	0
PE 20:1;0_22:6;0	0	0	0	0	0.482386	0	0	0.517614	0	0
PA 18:1;0_20:3;0	0	0	0	0	0.471192	0	0	0.528808	0	0
SM 38:1;2	0	0	0	0	0.472875	0	0	0.527125	0	0
PI 18:0;0_18:1;0	0	0	0	0	0.450257	0	0	0.549743	0	0
PS 18:0;0_22:5;0	0	0	0	0	0.460812	0	0	0.539188	0	0
DAG 16:0;0_22:5;0	0	0	0	0	0.256321	0	0	0.743679	0	0
PE O-16:1;0/22:4;0	0	0	0	0	0.327648	0	0	0.672352	0	0
SM 36:1;2	0	0	0	0	0.320932	0	0	0.679068	0	0
PC 18:0;0_20:2;0	0	0	0	0	0.466178	0.533822	0	0	0	0
PG 16:0;0_16:0;0	0	0	0	0	0.394194	0.325084	0	0.280722	0	0
PG 20:3;0_20:3;0	0	0	0	0	0.290973	0.337617	0	0.371411	0	0

## Sheet: 06_D
	lipidomics_median_Fr.1	lipidomics_median_Fr.2	lipidomics_median_Fr.3	lipidomics_median_Fr.4	lipidomics_median_Fr.5	lipidomics_median_Fr.6	lipidomics_median_Fr.7	lipidomics_median_Fr.8	lipidomics_median_Fr.9	lipidomics_median_Fr.10	lipidomics_median_Fr.11	lipidomics_median_Fr.12	lipidomics_median_Fr.13	lipidomics_median_Fr.14
SM 39:1;3	0	0	0	0	0	0.749456	0.662768	0	0	0	0	0	1	0
TAG 50:0;0	0	1	0	0	0	0	0	0	0	0	0	0	0	0
SM 38:3;2	0	1	0	0	0	0	0	0	0	0	0	0	0	0
SM 37:1;2	0	1	0	0	0	0	0	0	0	0	0	0	0	0
SM 29:1;3	0	1	0	0	0	0	0	0	0	0	0	0	0	0
DAG 16:0;0_18:0;0	0	1	0	0	0	0	0	0	0	0	0	0	0	0
SM 29:0;2	0	1	0	0	0	0	0	0	0	0	0	0	0	0
TAG 52:1;0	0	1	0	0.400065	0.319617	0.242966	0.25093	0.225948	0.180119	0.0892139	0.0537859	0.0507059	0.050464	0
TAG 56:1;0	0.33857	1	0	0.248771	0.296644	0.15178	0.17157	0.163078	0.19122	0.183617	0.159991	0	0.228049	0
DAG 16:0;0_18:2;0	0	0.587564	0.640575	0.325097	0.270398	0.0847483	0.189567	0.144896	0.243684	0.118474	0.014304	0.106855	0.257832	1
SM 36:2;3	0	1	0	0.2543	0.334286	0.143969	0.137183	0.111072	0.168954	0.194581	0.19662	0.172415	0.243139	0.649006
CE 18:0;0	0	0	0	1	0	0	0	0	0	0	0	0	0	0
DAG 18:1;0_20:1;0	0.276049	0	0.374974	1	0	0.136143	0	0.202162	0.217336	0	0	0	0	0
CE 17:1;0	0.187243	0	0	1	0.721446	0.469433	0.335376	0	0	0	0	0	0	0
DAG 18:0;0_18:1;0	0.117564	0.432421	0	1	0.396744	0.308684	0.151564	0.115895	0.128964	0.15698	0.116272	0.213216	0.184878	0.147523
DAG 14:0;0_16:0;0	0	0	0.667792	1	0	0.516018	0.50626	0.526068	0.631086	0	0	0	0	0
LPC 18:2;0	0.0927821	0	0.443497	1	0	0.571196	0.359303	0.505305	0.238942	0.39218	0.510752	0.435492	0.161477	0
LPC 20:4;0	0.116054	0	0.174491	1	0	0.557618	0.403734	0.568004	0.31511	0.469734	0.161034	0.460496	0.160319	0
DAG 14:0;0_18:2;0	0.734558	0	1	0.637545	0	0.549783	0.726203	0.556026	0.664141	0.452562	0	0	0	0
DAG 16:1;0_16:1;0	0.64996	0	1	0.573792	0	0.42106	0.473294	0.439585	0.573734	0.307194	0	0	0	0
DAG 16:1;0_18:2;0	0.724968	0	1	0.640212	0	0.524321	0.499784	0.542091	0.738712	0.316081	0	0	0	0
DAG 12:0;0_18:1;0	0.686254	0	1	0.924405	0.734477	0.452838	0.523224	0.354619	0.447827	0.270437	0	0	0	0
DAG 14:0;0_16:1;0	0.673292	0	0.885224	1	0.787755	0.595127	0.538437	0.47502	0.590962	0.468666	0	0	0	0
TAG 48:4;0	1	0	0.690683	0.77825	0.753927	0.698889	0.604036	0	0	0	0	0	0	0
TAG 50:5;0	1	0	0.857444	0.595081	0.471229	0.374806	0.409367	0.342182	0.254449	0	0	0	0	0
TAG 58:6;0	1	0	0.748092	0.518061	0.382326	0.359929	0.362658	0.35879	0.242036	0	0	0	0	0
TAG 52:6;0	1	0	0.756078	0.626659	0.433609	0.372063	0.356783	0.365639	0.273186	0.154824	0.113645	0	0	0
TAG 58:7;0	1	0	0.857537	0.591812	0.478232	0.428837	0.408768	0.420727	0.26733	0.14368	0	0	0	0
TAG 58:8;0	1	0	0.810661	0.696191	0.540087	0.468357	0.437626	0.412245	0.307875	0.182324	0	0	0	0
CE 16:0;0	0.965684	0	0.892801	1	0.737406	0.575696	0.437376	0.395866	0.244697	0	0	0	0	0
TAG 50:6;0	0.9902	0	0.61838	1	0.377109	0.597193	0.475846	0.472624	0.206887	0	0	0	0	0
DAG 18:1;0_18:2;0	0.276642	1	0.760156	0.460722	0.366091	0.226493	0.241138	0.274893	0.302985	0.163807	0.108345	0	0.0279423	0.16696
DAG 18:1;0_18:1;0	0.333445	0.997157	1	0.517545	0.417857	0.224402	0.285183	0.197537	0.313415	0.183472	0.0761084	0.0237289	0	0.110078
DAG 16:0;0_16:1;0	0.371521	0.911962	1	0.564626	0.404968	0.231504	0.287553	0.241052	0.28073	0.0755759	0.00243902	0	0.0143751	0.159807
DAG 16:0;0_18:1;0	0.43182	0.804123	1	0.59676	0.383964	0.223198	0.229222	0.27262	0.304559	0.0884872	0	0.0346375	0.0431031	0.110589
DAG 14:0;0_18:1;0	0.47277	0.913612	1	0.697828	0.580491	0.428683	0.420867	0.410191	0.420719	0.202753	0.053876	0.00305374	0	0.0667584
DAG 16:1;0_18:1;0	0.507713	0.883476	1	0.554654	0.523617	0.347308	0.385307	0.33317	0.448507	0.204494	0.173015	0.178838	0.171176	0
CE 16:1;0	0.6735	1	0.640928	0.697874	0.545915	0.368885	0.30002	0.296965	0.220548	0.129619	0	0	0	0
TAG 56:7;0	0.990894	1	0.785295	0.641827	0.483688	0.339346	0.29218	0.300665	0.242971	0.126728	0.0932703	0.100273	0.0999377	0
TAG 54:7;0	0.915201	1	0.742808	0.707451	0.564291	0.389462	0.363232	0.362825	0.298687	0.160927	0.118514	0.118957	0.129523	0
TAG 56:8;0	0.881563	1	0.770763	0.661165	0.505566	0.414443	0.438695	0.405824	0.310295	0.181776	0.165958	0.161646	0.161032	0
TAG 56:4;0	1	0.812004	0.827416	0.454531	0.349886	0.29865	0.324404	0.301318	0.183628	0.0941482	0.0747704	0.0812623	0.0714359	0
TAG 56:5;0	1	0.832781	0.827771	0.466063	0.378782	0.315947	0.33237	0.316379	0.206226	0.118397	0.0941818	0.089269	0.0937747	0
TAG 50:4;0	1	0.846798	0.822293	0.508835	0.351324	0.256375	0.258122	0.226842	0.194088	0.0905642	0.0621234	0.0750495	0.0701182	0
TAG 52:5;0	1	0.844464	0.791376	0.475825	0.400156	0.266826	0.26543	0.248136	0.215638	0.108521	0.0800927	0.091706	0.0872311	0
TAG 54:6;0	1	0.871311	0.837404	0.548442	0.433128	0.308358	0.294038	0.287726	0.242736	0.137321	0.0925816	0.106484	0.102068	0
TAG 56:6;0	1	0.878719	0.87145	0.500697	0.397828	0.289073	0.287739	0.281653	0.209438	0.109646	0.0734771	0.0769275	0.089509	0
TAG 50:1;0	1	0.897166	0.78323	0.388014	0.27982	0.193041	0.202643	0.178843	0.12058	0.0274182	0	0.00214537	0.000726809	0.031621
TAG 54:1;0	1	0.907042	0.758529	0.353215	0.310786	0.25089	0.238288	0.210066	0.1624	0.0748328	0	0.054925	0.0548113	0
TAG 56:3;0	1	0.73067	0.872772	0.380117	0.314958	0.278554	0.295475	0.284042	0.160133	0.0979936	0.0751402	0.0647606	0.0666933	0
TAG 51:2;0	1	0.750707	0.851656	0.400914	0.303539	0.254972	0.257779	0.245356	0.161418	0.0776457	0.0562531	0.0544486	0.0546201	0
TAG 56:2;0	1	0.772638	0.850138	0.380412	0.31061	0.27817	0.27406	0.240928	0.186042	0.104597	0.0695569	0.063704	0.0656034	0
TAG 53:2;0	1	0.761754	0.872697	0.375342	0.315243	0.251477	0.266506	0.233461	0.168663	0.0817257	0	0	0	0
TAG 53:3;0	1	0.802913	0.8832	0.383289	0.337274	0.253418	0.267272	0.256637	0.156136	0.0665325	0	0	0	0
TAG 48:3;0	1	0.859116	0.834512	0.444013	0.32304	0.240674	0.233434	0.204139	0.117881	0.0130152	0.00422004	0.00229732	0	0.00206058
TAG 44:2;0	1	0.794783	0.802047	0.45571	0.36258	0.270213	0.239365	0.21926	0.164173	0.0740122	0.000252946	0	0	0
TAG 54:5;0	1	0.805736	0.850861	0.444192	0.350472	0.249554	0.267914	0.244812	0.165712	0.0311045	0.0281259	0	0.0252753	0.00647058
TAG 42:1;0	1	0.694406	0.802819	0.432539	0.330411	0.264419	0.225104	0.200502	0.148441	0.0647393	0.0578694	0.0425737	0.00116072	0
TAG 52:2;0	1	0.704232	0.847061	0.340118	0.256934	0.195991	0.208947	0.175533	0.115783	0.0237213	0.0024369	0.000452068	0	0.0256739
TAG 54:2;0	1	0.666939	0.847639	0.354613	0.26601	0.199034	0.209883	0.193731	0.12221	0.0282497	0	0.00437739	0.00271251	0.0322318
TAG 44:1;0	1	0.720611	0.819452	0.41068	0.290775	0.246442	0.208803	0.179086	0.115435	0.0133596	0.00837794	0	0.000688045	0.0130058
TAG 46:1;0	1	0.70984	0.826488	0.407663	0.299183	0.210678	0.210086	0.189445	0.121224	0.0246391	0	0.00407149	0.00625646	0.0412352
TAG 48:2;0	1	0.738706	0.814841	0.414153	0.29795	0.213931	0.224931	0.19514	0.127196	0.0281036	0	0.00682096	0.00413963	0.0340686
TAG 46:2;0	1	0.778272	0.801854	0.40781	0.29082	0.245229	0.220267	0.198042	0.110468	0.0112873	0.00392686	0.000560265	0	0.0056201
TAG 48:1;0	1	0.777537	0.79149	0.396143	0.277742	0.205089	0.212695	0.181946	0.117645	0.0263508	0.00107948	0.00152263	0	0.0366703
TAG 54:4;0	1	0.792173	0.835615	0.375232	0.307509	0.231441	0.239043	0.222801	0.130191	0.0298784	0	0.0062428	0.00771153	0.0391204
TAG 50:2;0	1	0.735334	0.845608	0.384618	0.275686	0.20223	0.218615	0.196791	0.124176	0.0284701	0	0.00311626	0.00272519	0.0296839
TAG 54:3;0	1	0.74219	0.827755	0.388265	0.27976	0.210458	0.218407	0.203896	0.126846	0.0285087	0	0.00238102	0.00307903	0.0249066
TAG 50:3;0	1	0.778404	0.833431	0.382743	0.282524	0.215823	0.221495	0.196489	0.117897	0.0224415	0	0.00101337	0.00138853	0.0242389
TAG 52:3;0	1	0.773659	0.847474	0.363856	0.27723	0.217246	0.226593	0.204216	0.122294	0.0259651	0	0.000209033	0.000187196	0.0195997
TAG 49:1;0	1	0.767253	0.82902	0.374038	0.284605	0.242117	0.258279	0.224409	0.154306	0	0	0	0	0
TAG 52:4;0	1	0.70073	0.808424	0.387524	0.294801	0.223065	0.24387	0.223455	0.14267	0.0295643	0.0167594	0.0126587	0.0041298	0
TAG 42:0;0	1	0.991202	0.664885	0.395582	0.308945	0.214005	0.202657	0.174522	0.146534	0.0601548	0.055091	0.0631354	0.00363253	0
TAG 44:0;0	1	0.904421	0.591891	0.433969	0.307433	0.2386	0.216711	0.182674	0.148684	0.0700093	0.0568918	0.0464046	0.0470796	0
TAG 46:0;0	0.95892	1	0.567505	0.407091	0.29372	0.21711	0.201343	0.167897	0.133226	0.059607	0.050084	0.0428409	0.0439137	0
TAG 48:0;0	0.856822	1	0.481983	0.309843	0.232622	0.19408	0.159622	0.130958	0.104589	0.050941	0.0388176	0.0405046	0.0342366	0
TAG 40:0;0	0.735607	1	0.627943	0.392894	0.308501	0.258056	0.231549	0.19239	0.118003	0	0	0	0	0
TAG 46:3;0	0.722994	1	0.564098	0.374399	0.261625	0.227548	0.199637	0.165979	0.129036	0	0	0	0	0
CE 18:2;0	0.282037	0.944914	0.373736	1	0.714035	0.409935	0.336408	0.287113	0.252782	0.147355	0	0	0	0
CE 20:4;0	0	0.991881	0	1	0.764225	0.431488	0.336816	0.254159	0.136912	0	0	0	0	0
CE 18:1;0	0.771107	0.721283	0.737284	1	0.736193	0.497555	0.43124	0.390151	0.236066	0.0429865	0.0204698	0.00360752	0	0.0374644
DAG 16:0;0_16:0;0	0.443836	1	0.490583	0.765824	0.743795	0.500963	0.437107	0.451148	0.385616	0.247781	0.168313	0.169563	0.222394	0
DAG 16:1;0_20:1;0	0	0	1	0	0	0	0	0	0	0	0	0	0	0
LPC 16:1;0	0	0	1	0	0	0	0	0	0	0	0	0	0	0
TAG 58:5;0	1	0	0	0.68648	0	0.283377	0.247396	0.269445	0	0	0	0	0	0
TAG 58:4;0	1	0	0	0	0	0	0.185471	0.174152	0	0	0	0	0	0
TAG 55:4;0	1	0	0	0	0	0	0	0	0	0	0	0	0	0
TAG 55:3;0	1	0	0	0	0	0	0	0	0	0	0	0	0	0
TAG 51:4;0	1	0	0	0	0	0	0	0	0	0	0	0	0	0
TAG 44:3;0	1	0	0	0	0	0	0	0	0	0	0	0	0	0
TAG 36:0;0	1	0	0	0	0	0	0	0	0	0	0	0	0	0
SM 43:3;2	1	0	0	0	0	0	0	0	0	0	0	0	0	0
LPA 20:2;0	1	0	0	0	0	0	0	0	0	0	0	0	0	0
SM 39:3;2	1	0	0	0	0	0	0	0	0	0	0	0	0	0
DAG 14:1;0_16:0;0	0.797751	0	1	0	0	0	0.370299	0.428382	0.611132	0	0	0	0	0
DAG 18:1;0_18:3;0	0.62593	0	1	0	0	0	0	0	0	0	0	0	0	0
LPC 20:3;0	0.527798	0	1	0	0	0	0	0	0	0	0	0	0	0
TAG 42:2;0	1	0	0.769587	0	0	0.23388	0.229022	0.18593	0	0	0	0	0	0
DAG 18:2;0_18:2;0	1	0	0.780404	0.0671097	0.0574574	0.102202	0.108077	0.0885717	0.122472	0.0932951	0.0761315	0.0899	0.090878	0
SM 41:3;2	1	0	0.774144	0	0	0	0	0	0	0	0	0	0	0
TAG 49:3;0	1	0	0.757294	0	0	0	0	0	0	0	0	0	0	0
TAG 45:1;0	1	0	0.826318	0	0	0	0	0	0	0	0	0	0	0
TAG 38:0;0	1	0	0.860953	0	0	0	0	0	0	0	0	0	0	0
TAG 47:2;0	1	0	0.862173	0	0	0	0	0	0	0	0	0	0	0
TAG 47:1;0	1	0	0.810856	0.450203	0.374064	0	0	0	0	0	0	0	0	0
TAG 40:1;0	1	0	0.852174	0.462983	0.339417	0.268886	0.266458	0.211132	0	0	0	0	0	0
TAG 49:2;0	1	0	0.786804	0.419767	0.305456	0.278671	0.269952	0.244659	0.176364	0	0	0	0	0
TAG 51:1;0	1	0	0.804337	0.418424	0	0.241777	0.22171	0.215266	0	0	0	0	0	0
TAG 53:4;0	1	0	0.796695	0.460103	0	0.297406	0.285101	0.233335	0	0	0	0	0	0
TAG 51:3;0	1	0	0.828272	0.421426	0	0.235982	0.270144	0.23843	0.178493	0	0	0	0	0
TAG 58:3;0	1	0	0.862113	0.397263	0	0.241587	0.183417	0.211398	0.180838	0	0	0	0	0
PC 18:0;0_20:2;0	0	0	0	0	0	0	0	0	1	0	0.298494	0.993823	0.868541	0
PC 18:1;0_20:1;0	0	0	0	0	0	0	0	0	0.668562	0	0.39253	1	0.842766	0
PC 20:4;0_20:4;0	0	0	0	0	0	0	0	0.241027	0.612731	0.523049	0.622451	1	0.953392	0
PI 20:0;0_20:4;0	0	0	0	0	0	0	0	0	0.864004	0.747525	0.73055	0.796558	1	0
LPE O-14:1;0	0	0	0	0	0	0	0	0.722554	0.640694	0.591168	0.607555	0	1	0
PC 18:0;0_18:3;0	0	0	0	0	0	0	0	0.618358	0.804612	0.804171	0.944399	0	1	0
PA 18:0;0_18:2;0	0	0	0	0	0	0	0	0	0.919144	0.957325	1	0	0.884792	0
PC 18:1;0_22:5;0	0	0	0	0	0	0	0	0	0.486832	0.877337	0.650199	0	1	0
PE 16:1;0_20:3;0	0	0	0	0	0	0	0	0	0.454835	0.634455	1	0	0.768873	0
PI 18:2;0_18:2;0	0	0	0	0	0	0.572213	0	0.642102	0.874262	0.935928	0.750121	0.611228	1	0
PS 18:2;0_20:4;0	0	0	0	0	0	0.753812	0.154755	0.153652	1	0.805025	0.824923	0	0.673582	0
PS 18:0;0_22:4;0	0	0	0	0	0	0	0	0.594682	0	1	0	0	0	0
PE 16:0;0_18:3;0	0	0	0	0	0	0	0	0	0	1	0.441325	0	0	0
LPG 16:0;0	0	0	0	0	0	0	0	0	0	1	0	0	0	0
PE 20:1;0_22:6;0	0	0	0	0	0	0	0	0	0	1	0	0	0	0
PI 18:0;0_22:6;0	0	0	0	0	0	0	0	0	0	1	0	0	0	0
PG 18:2;0_18:2;0	0	0	0	0	0	0	0	0	0	1	0	0	0	0
PG 18:0;0_20:4;0	0	0	0	0	0	0	0	0	0	1	0	0	0	0
PG 16:1;0_20:3;0	0	0	0	0	0	0	0	0	0	1	0	0	0	0
PG 16:1;0_18:0;0	0	0	0	0	0	0	0	0	0	1	0	0	0	0
PA 18:1;0_20:3;0	0	0	0	0	0	0	0	0	0	1	0	0	0	0
PC 15:0;0_18:2;0	0	0	0	0	0	0	0	0	0	1	0	0	0	0
PC 16:1;0_17:0;0	0	0	0	0	0	0	0	0	0.591619	1	0.95526	0	0	0
PC 14:0;0_18:0;0	0	0	0	0	0	0	0	0	0.856949	0.740632	1	0	0	0
PE 18:0;0_20:1;0	0	0	0	0	0	0	0	0	1	0.95183	0.975314	0	0	0
SM 38:1;2	0	0	0	0	0	0	0	0	0.802508	1	0.898194	0	0	0
PS 18:0;0_22:5;0	0	0	0	0	0	0	0	0.809959	0	0.86559	1	0	0	0
PC 20:3;0_20:4;0	0	0	0	0	0	0	0	0	0	1	0.780704	0	0	0
PE O-20:1;0/20:4;0	0	0	0	0	0	0	0	0	0	0.914704	1	0	0	0
PI 18:0;0_20:2;0	0	0	0	0	0	0	0	0	0	0.894901	1	0	0	0
PC 20:1;0_20:4;0	0	0	0	0	0	0	0	0	0	1	0.952037	0	0	0
PG 16:0;0_16:1;0	0	0	0	0	0	0	0	0	0	1	0.987217	0	0	0
PI 18:0;0_18:1;0	0	0	0	0	0	0	0	0	0	1	0.998685	0	0	0
PG 18:0;0_22:6;0	0	0	0	0	0	0	0	0	0	0.654674	1	0	0	0
PE 19:0;0_20:4;0	0	0	0	0	0	0	0	0	0	0.749353	1	0	0	0
PE O-18:1;0/22:4;0	0	0	0	0	0	0	0	0	0	0.807569	1	0	0	0
PE O-18:2;0/20:3;0	0	0	0	0	0	0	0	0	0	0.796945	1	0	0	0
CL 68:5;0	0	0	0	0	0	0	0	0	0	0	1	0.859844	0	0
CL 70:4;0	0	0	0	0	0	0	0	0	0	0	1	0.944666	0	0
PC 17:0;0_18:2;0	0	0	0	0	0	0	0	0	0.825573	0	1	0	0	0
LPI 20:4;0	0	0	0.166197	0	0	0.226856	0.176636	0.184719	0.176895	0.394296	1	0.29798	0.290256	0
PS 18:2;0_20:3;0	0	0	0	0	0	0	0	0	0	0	1	0	0	0
PG 16:0;0_16:0;0	0	0	0	0	0	0	0	0	0	0	1	0	0	0
PC 17:0;0_18:1;0	0	0	0	0	0	0	0	0	0	0	1	0	0	0
PE 18:2;0_20:1;0	0	0	0	0	0	0	0	0	0	0	1	0	0	0
PE 22:6;0_22:6;0	0	0	0	0	0	0	0	0	0.80592	0.899472	1	0.999856	0	0
PC 18:2;0_22:6;0	0	0	0	0	0	0	0	0.591456	0	0.835103	1	0.930344	0	0
PE 20:4;0_20:4;0	0	0	0	0	0	0	0	0	0	0.661136	1	0.609773	0	0
PE 20:0;0_20:4;0	0	0	0	0	0	0	0	0	0	0.97842	1	0.89987	0	0
CL 70:5;0	0	0	0	0	0	0	0	0	0	0.698961	1	0.916421	0	0
PE 17:0;0_20:4;0	0	0	0	0	0	0	0	0	0	0.805761	1	0.75955	0	0
PE 18:2;0_22:6;0	0	0	0	0	0	0	0	0	0	0.820176	1	0.880304	0	0
PI 18:2;0_20:4;0	0	0	0	0	0	0	0	0	0	0.856503	1	0.846561	0	0
CL 70:6;0	0	0	0	0	0	0	0	0	0	0.808203	1	0.872892	0.620409	0
CL 70:7;0	0	0	0	0	0	0	0	0	0	0.718535	1	0.768569	0.65741	0
CL 72:6;0	0	0	0	0	0	0	0	0	0	0.724128	1	0.855218	0.711943	0
CL 72:7;0	0	0	0.0728423	0	0	0	0	0	0.135985	0.757562	1	0.858947	0.660889	0
CL 72:8;0	0	0	0.0714472	0	0	0	0	0	0.129573	0.787581	1	0.732518	0.610842	0
CL 74:8;0	0	0	0	0	0	0	0	0	0	0.778374	1	0.803155	0.488039	0
CL 74:9;0	0	0	0	0	0	0	0	0	0	0.714107	1	0.659391	0.596872	0
PA 16:0;0_18:2;0	0	0	0	0	0	0	0	0	0	0.691449	0.607587	0.808622	1	0
PC 16:1;0_20:3;0	0	0	0	0	0	0	0	0	0	0.844383	0.807921	0.963989	1	0
PE 18:0;0_20:5;0	0	0	0	0	0	0.340265	0.359797	0.41077	0	0.850973	1	0.903669	0.798945	0
PE 18:0;0_20:4;0	0	0.0552308	0.0794995	0.18792	0.231915	0.241809	0.258634	0.287622	0.359834	0.815716	1	0.933226	0.760226	0.451518
PE 18:2;0_18:2;0	0	0	0.100416	0	0	0.179547	0.197687	0.225414	0.269269	0.613689	1	0.995663	0.692203	0.240789
PG 16:0;0_18:1;0	0	0	0.0889413	0.128966	0	0.175748	0.198882	0.202579	0.245352	0.735727	1	0.912374	0.739465	0.434725
DAG 16:0;0_22:5;0	0	0	1	0	0	0.31339	0.367747	0.576151	0.662778	0.724068	0.341684	0.768335	0.527716	0
LPE 18:2;0	0.401908	0	1	0	0	0	0	0.840967	0	0.699363	0.612643	0	0	0
Cer 39:1;2	0	0	0	0	0	0.853382	0	1	0.773038	0.981035	0.906973	0	0	0
SM 40:2;2	0	0	0	0	0	1	0	0.6946	0.770865	0.67583	0.530877	0.580621	0	0
PG 20:3;0_20:3;0	0	0	0	0	0	0	0	0.492703	1	0.719982	0.760054	0	0	0
PC 14:0;0_18:2;0	0	0	0	0	0	0	0	0.832981	0.791339	0.696231	1	0	0	0
Cer 41:2;2	0	0	0	0	0	0	0	0.878919	1	0.919281	0.961604	0	0	0
PE O-16:1;0/22:6;0	0	0	0	0	0	0	0	0.873355	0.931278	0.827234	1	0	0	0
PS 18:1;0_18:1;0	0	0	0	0	0	0	0	0.962456	1	0.830294	0.95582	0	0	0
PE O-16:1;0/22:5;0	0	0	0	0	0	0	0	0.873038	1	0.944437	0.579236	0	0	0
PE O-16:1;0/22:4;0	0	0	0	0	0	0	0	1	0.727865	0.846617	0.725889	0	0	0
PE O-18:1;0/20:4;0	0	0	0	0	0	0	0	1	0.817469	0.72705	0.639424	0	0	0
PE O-18:2;0/20:4;0	0	0	0	0	0	0	0.39829	1	0.804314	0.717245	0.769971	0.504332	0	0
SM 41:1;2	0	0	0.214442	0	0	0	0	1	0.919565	0.920716	0.788822	0.744702	0	0
PC 16:0;0_17:1;0	0	0	0	0	0	0	0	1	0.573088	0.773181	0.79233	0.672216	0	0
PC 14:0;0_16:0;0	0	0	0	0	0	0	0	0.794229	0.761007	0.922211	1	0.879552	0	0
PC 15:0;0_18:1;0	0	0	0	0	0	0	0	0.678601	0.594275	0.842495	1	0.835771	0	0
PC 16:0;0_20:5;0	0	0	0	0	0	0.545798	0.400248	1	0.502843	0.315069	0.289271	0.62602	0.474642	0.596753
PG 18:1;0_18:1;0	0.0302959	0	0.201973	0.511509	0.574394	0.515348	0.633882	1	0.840177	0.497346	0.363089	0.356816	0.311774	0.713449
PG 16:1;0_18:1;0	0	0	0.209756	0	0.324254	0.467304	0.707971	1	0.973386	0.704739	0.399387	0.391866	0.376427	0.43299
PG 18:1;0_18:2;0	0	0	0.175779	0	0	0.62007	0.638332	1	0.890406	0.614266	0.419197	0.381212	0	0.579433
PG 18:1;0_22:6;0	0	0	0	0	0	0.431009	0.603046	1	0.956332	0.563997	0.206669	0.117422	0.22125	0.5729
HexCer 40:1;2	0	0	0	0	0	1	0.919271	0.973124	0.86411	0.91253	0.885163	0	0	0
PE 18:0;0_20:2;0	0	0	0	0	0	0.834474	0.919777	1	0.985626	0.941088	0.56972	0	0	0
PS 18:0;0_18:1;0	0	0	0	0	0	0.337687	0.811624	1	0.487628	0.821118	0.725997	0	0	0.789495
Cer 42:3;2	0	0	0	0	0	0	0.765978	0.845205	1	0.930783	0.915603	0	0	0
LPG 18:1;0	0	0	0	0	0	0	0.757245	1	0.673777	0.650636	0.504652	0	0	0
PE 16:1;0_18:2;0	0	0	0	0	0	0	0.833367	1	0.815682	0.719657	0.641649	0	0	0
PA 18:1;0_18:2;0	0	0	0	0	0	0	0	1	0.949688	0	0	0	0	0
TAG 58:10;0	0	0	0	0	0	0	0	1	0.989616	0	0	0	0	0
DAG 18:1;0_22:6;0	0	0	0	0	0	0	0	0.740321	1	0	0	0	0	0
PA 16:0;0_16:1;0	0	0	0	0	0	0	0	0.570713	1	0	0	0	0	0
PG 16:1;0_18:2;0	0	0	0	0	0	0	0	0.727747	0.738827	1	0	0	0	0
PG 18:1;0_20:4;0	0	0	0	0	0	0	0	1	0.762159	0.554096	0	0	0	0
PG 22:6;0_22:6;0	0	0	0	0	0	0	0	0.823591	1	0.628287	0	0	0	0
PG 18:1;0_20:3;0	0	0	0	0	0	0	0	0.9884	1	0.522034	0	0	0	0
PG 18:1;0_22:5;0	0	0	0	0	0	0	0	0.847596	1	0.44029	0	0	0	0
PG 16:1;0_22:6;0	0	0	0	0	0	0	0	0	1	0	0	0	0	0
DAG 16:0;0_20:1;0	0	0	0	0	0	0	0	0	1	0	0	0	0	0
PE 18:1;0_20:2;0	0	0	0	0	0	0	0	0	1	0	0	0	0	0
SM 36:1;2	0	0	0	0	0	0	0	0	0.695957	1	0	0	0	0
PG 18:0;0_18:1;0	0	0	0	0	0	0	0	0	1	0.840202	0	0	0	0
PG 20:4;0_20:4;0	0	0	0	0	0	0	0	0	1	0.715576	0	0	0	0
PA 18:0;0_20:4;0	0	0	0	0	0	0	0	1	0	0.41745	0	0	0	0
PS 16:0;0_22:6;0	0	0	0	0	0	0	0	1	0	0	0	0	0	0
PC 18:0;0_22:4;0	0	0	0	0	0	0	0	1	0	0	0	0	0	0
LPS 22:6;0	0	0	0	0	0	0	0	1	0	0	0	0	0	0
PA 14:0;0_18:1;0	0	0	0	0	0	0	0	1	0	0	0	0	0	0
PI 16:0;0_18:1;0	0	0	0	0	0	0	1	0.554912	0.822951	0	0	0	0	0
TAG 58:9;0	0	0	0	0	0	0	1	0.955063	0	0	0	0	0	0
PC 16:1;0_16:1;0	0	0	0	0	0	0	0.439422	0.442623	0.415269	0.572321	0.651804	1	0	0.994628
PE 16:0;0_20:1;0	0	0	0	0	0	0.908016	0.913605	1	0.883285	0.987281	0.962091	0	0.983962	0
PE 16:0;0_22:4;0	0	0	0	0	0	0.621387	0.69509	0.727152	0.746913	0.868633	0.870649	0	1	0
PA 16:1;0_18:1;0	0	0	0	0	0	0.752399	0.715116	1	0.869035	0.397645	0.335513	0.396827	0.603132	0
PS 18:1;0_20:4;0	0	0	0	0	0	0.621074	1	0.818521	0.820692	0.755397	0.514228	0.491367	0.728725	0
PE 18:1;0_20:1;0	0	0	0	0	0	0.64528	0.88663	0.745155	0.671429	0.544969	0.490017	0.952377	1	0
Cer 38:1;2	0	0	0	0	0	0.810035	0.857193	1	0.94144	0.860403	0.900745	0.702473	0.622095	0
PS 18:0;0_18:2;0	0	0	0	0	0	0.744502	0.98208	0.795123	1	0.874858	0.862712	0.858682	0.528734	0
DAG 18:1;0_20:4;0	0	0	0	0	0	0.740488	0.96438	0.893091	0.93862	0.950403	0.774479	0.739	1	0
DAG 16:1;0_18:0;0	0	0	0	0	0	0.895241	0.861559	0.866248	0.883659	0.700586	0.797443	1	0.977857	0
PC 16:0;0_18:3;0	0	0	0	0	0	0.614199	0.719961	0.959403	0.846805	0.812914	0.910053	1	0.871651	0
PC 18:1;0_20:2;0	0	0	0	0	0	0.819365	0.562022	0.539968	0.843668	0.908501	0.888184	0.856185	1	0
PC 18:2;0_20:1;0	0	0	0	0	0	0.908356	0.688161	0.708297	0.936654	0.908575	0.957488	1	0.973846	0
PE 18:2;0_20:4;0	0	0	0	0	0	0.474723	0.551717	0.579915	0.51916	0.879967	1	0.980157	0.977849	0
PE 16:0;0_16:1;0	0	0	0	0	0	0.59405	0.629835	0.664007	0.739152	0.992581	1	0.99962	0.977678	0
PI 18:0;0_22:5;0	0	0	0	0	0	0.592912	0.722592	0.675848	0.768376	0.785537	0.740014	0.8496	1	0
PC 16:1;0_22:6;0	0	0	0	0	0	0.517364	0.627137	0.61161	0.715969	0.819357	0.907926	0.95204	1	0
PE 16:0;0_20:5;0	0	0	0	0	0	0.471441	0.652573	0.718507	0.695311	0.900966	0.88374	0.801779	1	0
PE O-22:0;0/16:0;0	0	0	0	0	0	0.423892	0.427901	0.62743	0.602486	0.627093	0.689578	1	0.988429	0
PG 16:0;0_18:2;0	0	0	0	0	0	0.339064	0.521578	0.418986	0.503076	0.722549	1	0.840415	0.738331	0
PC 16:1;0_18:2;0	0	0	0.0144774	0.61978	0	0.55864	0.72434	0.822826	0.754494	0.83572	0.945771	1	0.906218	0
PS 18:0;0_20:3;0	0	0	0	0.502585	0	1	0.775789	0.562202	0.880734	0.924298	0.836714	0.894867	0.492962	0
PA 18:1;0_18:1;0	0	0	0	0	0	0	0.738352	0.997217	1	0.660682	0.608046	0.94118	0.951614	0
LPS 18:0;0	0	0	0	0	0	0	0.502359	0.457647	0.392327	1	0.990212	0.835987	0.448183	0
PC 18:0;0_20:5;0	0	0	0	0	0	0	0.722578	0	0.772068	0.716502	0.746221	0.967605	1	0
PC 16:0;0_22:4;0	0	0	0	0	0	0	0.598396	0.412208	0.874319	0.785407	0.833965	1	0.815117	0
PE 18:1;0_20:5;0	0	0	0	0	0	0	0.642891	0.649153	0.714172	0.871885	1	0.957288	0.987164	0
PC 16:0;0_20:1;0	0	0	0	0	0	0.622185	0.670754	0.800038	0.736239	0.705209	0.871962	0	1	0.849855
PE O-16:1;0/20:4;0	0	0	0.0604118	0.223521	0	0.722514	0.772001	0.956611	1	0.907788	0.872445	0.555341	0.465597	0.683199
PI 16:0;0_18:2;0	0	0	0	0	0	0	0.732728	0.648714	0.650046	0.865677	1	0.770296	0.962096	0.852483
PI 18:1;0_20:3;0	0	0	0	0	0.530879	0.649337	0.635029	0.749521	0.726841	0.563992	0.51582	0.770837	1	0.649204
PG 20:3;0_20:4;0	0	0	0	0.187076	0	0.566025	0.597355	0.49637	0.826208	0.696963	0.549124	0.420112	0.462693	1
PI 18:0;0_22:4;0	0	0	0	0	0	0.661864	0.700713	0.484558	0.503742	0.51315	0.525169	0.452696	0.801567	1
PE 18:0;0_22:4;0	0	0	0	0	0	0.627133	0.820013	0.939868	0.723399	0.523842	0.5728	0.558285	0.975195	1
PC 18:0;0_22:5;0	0	0	0	0	0	0.536046	0.65906	0.578984	0.718964	0.607173	0.533588	0.673674	1	0.819899
PC 18:2;0_20:3;0	0	0	0	0	0	0.605725	0.531528	0.450055	0.685368	0.571799	0.586989	0.926592	1	0.774477
PC 16:1;0_20:4;0	0	0	0	0	0	0.534971	0.49893	0.423081	0.62251	0.839718	1	0.901364	0.899957	0.743093
PE 20:1;0_20:4;0	0	0	0	0	0	0.552821	0.600128	0.543279	0.621249	0.865587	0.960522	0.94403	1	0.697549
PG 18:0;0_18:2;0	0	0	0	0	0	0.566706	0.640292	0.841637	0.715495	0.704266	0.72793	0.616907	0.825173	1
PC 14:0;0_18:1;0	0	0	0	0	0	0.704987	0.627125	0.688226	0.59948	0.750387	0.782938	0.850242	0.808449	1
PI 18:1;0_18:2;0	0	0	0	0	0	0.594361	0.62883	0.571744	0.779161	0.766891	0.714489	0.741111	0.881448	1
PC 18:0;0_18:1;0	0.0442734	0.26117	0.0794668	0	0	0.583398	0.651492	0.802549	0.725116	0.724264	0.802737	0.986316	1	0.960622
PE 16:1;0_18:0;0	0	0	0.211467	0	0	0.56588	0.620999	0.654877	0.658455	0.894788	0.896413	0.954341	0.917958	1
PA 16:0;0_18:1;0	0	0	0	0	0	0.655005	0.759987	0.782917	0.833748	0.779877	0.793898	0.844881	1	0.931418
PE 16:1;0_22:6;0	0	0	0	0	0	0.684863	0.674971	0.750915	0.776291	0.866999	0.911189	0.90057	0.972752	1
PS 16:0;0_20:4;0	0	0	0	0	0.922683	0.856193	0.881006	0.972907	1	0.916009	0.764165	0.747503	0.746007	0.703815
PC 16:1;0_18:0;0	0	0	0	0.586552	0	0.735798	0.702298	0.678887	0.834183	0.970506	0.920222	0.932974	1	0.920401
LPE 18:0;0	0	0.162188	0.170114	0.737123	0.653864	0.616309	0.535955	0.645268	0.470784	0.956841	1	0.761113	0.511763	0.845037
DAG 18:0;0_20:4;0	0	0	0.279879	0.634595	0.642098	0.555897	0.576219	0.564144	0.725141	0.947079	1	0.937935	0.958299	0.470461
PE 16:0;0_18:1;0	0.0574639	0	0.166703	0.855819	1	0.773385	0.894469	0.860197	0.818225	0.974597	0.968235	0.959868	0.86228	0.874154
PE 18:0;0_22:5;0	0	0	0.245428	0.790258	1	0.65409	0.650613	0.641221	0.686808	0.860406	0.86875	0.839876	0.808296	0.66626
PC 16:0;0_22:5;0	0	0	0.187936	0.738631	0.763456	0.673277	0.691624	0.412512	0.71929	0.484441	0.482855	0.878433	1	0.970402
PE 16:1;0_18:1;0	0	0	0.187767	0	0.564529	0.590596	0.574107	0.631331	0.68111	0.867235	0.996257	0.977715	1	0.990541
PE 18:1;0_22:5;0	0	0	0	0	0.530787	0.674745	0.70037	0.660168	0.767257	0.85158	1	0.916469	0.983216	0.944209
DAG 16:0;0_22:6;0	0.397166	0	0.488821	0.514125	0.525981	0.619258	0.709033	0.734672	0.710625	0.692776	0.772025	0.854065	0.940265	1
DAG 18:0;0_18:2;0	0.19135	0	0.378973	0.755277	0.563561	0.576772	0.584422	0.620361	0.731576	0.844064	1	0.841473	0.936396	0.986606
PE 16:0;0_20:4;0	0	0.105219	0.0916819	0.302076	0.39498	0.475658	0.505192	0.526675	0.586374	0.892102	1	0.976529	0.911649	0.656275
DAG 16:0;0_20:3;0	0	0	0	0.384554	0.585009	0.518117	0.566622	0.586246	0.600655	0.879711	0.81593	0.868461	1	0.802577
PC 18:2;0_20:4;0	0	0	0.114523	0.363942	0.410918	0.516894	0.582135	0.522889	0.664296	0.960277	0.930908	0.85318	1	0.771965
DAG 16:0;0_20:4;0	0	0	0	0.385258	0.477595	0.513822	0.614218	0.664926	0.602652	0.746439	0.676163	0.728501	0.789323	1
LPI 18:0;0	0	0	0.07947	0.259453	0.336639	0.441029	0.504468	0.509949	0.609753	0.730301	0.779182	0.790086	0.676924	1
PC 16:0;0_20:2;0	0	0	0	0.587778	0.773504	0.841246	0.682421	0.431657	0.752881	0.909887	1	0.972768	0.978273	0.895436
PE 16:0;0_20:3;0	0	0	0.173869	0.554745	0.596983	0.690433	0.742225	0.74885	0.713458	0.934258	1	0.891331	0.878653	0.849168
PE 16:0;0_22:6;0	0	0.145299	0.130946	0.505595	0.596921	0.669412	0.706173	0.713629	0.754984	0.909104	0.961983	0.985342	1	0.786525
PE 16:0;0_18:2;0	0	0	0.0947425	0.521874	0.583092	0.656323	0.673886	0.72778	0.779289	0.953508	0.999119	1	0.996556	0.819815
PE 16:0;0_22:5;0	0.015752	0	0.173718	0.53122	0.606795	0.702013	0.690904	0.762667	0.749568	0.869499	0.9331	1	0.961056	0.85269
PE 18:1;0_18:2;0	0.0318423	0	0.148744	0.442973	0.592996	0.695323	0.709544	0.79798	0.824774	0.924185	0.927372	0.986247	1	0.849229
PE 18:1;0_20:4;0	0	0.0972578	0.117108	0.379078	0.465333	0.568629	0.64	0.642228	0.683245	0.862234	0.952535	0.992602	1	0.744593
PE 18:0;0_22:6;0	0.0370313	0	0.178999	0.479501	0.521264	0.616096	0.645041	0.639552	0.694079	0.935419	1	0.964172	0.955968	0.767077
PE 18:1;0_22:6;0	0.012048	0	0.137003	0.418389	0.517446	0.636715	0.692566	0.69543	0.736344	0.887161	0.924144	0.941176	1	0.7227
PC 18:2;0_18:2;0	0	0	0.129863	0.469082	0.493259	0.636561	0.594298	0.626544	0.643267	0.828987	0.84889	0.88122	1	0.866158
PE 18:1;0_20:3;0	0	0	0.163806	0.450233	0.607569	0.643083	0.663043	0.61434	0.670854	0.852918	0.879213	1	0.957164	0.82913
PE 18:0;0_18:1;0	0	0	0.304227	0.654705	0.758722	0.646125	0.676181	0.877638	0.813007	0.879916	0.901647	1	0.870512	0.925479
PE 16:1;0_20:4;0	0	0	0.125509	0.503435	0.651058	0.749025	0.718444	0.79482	0.908483	0.832953	0.857537	0.930658	1	0.975507
PE 18:1;0_18:1;0	0.0314241	0	0.212508	0.592919	0.662284	0.769159	0.882527	0.93788	0.942701	0.978795	0.991975	0.966506	1	0.97058
PE 18:0;0_18:2;0	0.0172134	0	0.152543	0.501194	0.644356	0.724821	0.825767	0.853678	0.887355	0.970246	0.972365	1	0.987798	0.901328
PE 18:0;0_20:3;0	0.0372077	0	0.178232	0.56956	0.642102	0.734321	0.789514	0.874554	0.830298	0.924399	0.844607	1	0.977105	0.911342
PC 16:0;0_18:2;0	0	0.26027	0.125232	0.66205	0.64032	0.711577	0.729154	0.938195	0.819606	0.788581	0.786823	0.876775	0.978545	1
PC 16:0;0_16:1;0	0	0.206733	0.0770957	0.462479	0.716224	0.547307	0.559958	0.601533	0.587042	0.646964	0.688886	0.69977	0.802125	1
PC 18:0;0_20:3;0	0.0138303	0	0.158788	0.67628	0.581364	0.759931	0.710635	0.596823	0.780038	0.72767	0.733383	0.773713	0.924684	1
PC 16:0;0_22:6;0	0	0.176964	0.115684	0.554842	0.56788	0.661936	0.69073	0.717994	0.766805	0.796816	0.808728	0.816911	1	0.981367
PC 16:0;0_20:3;0	0	0.191018	0.113977	0.549433	0.673198	0.690732	0.624091	0.653708	0.7807	0.780595	0.780802	0.843271	1	0.960809
PC 18:0;0_20:4;0	0	0.24059	0.121997	0.476649	0.645103	0.696367	0.678236	0.688171	0.776122	0.762198	0.768168	0.792712	1	0.987597
PC 18:0;0_18:2;0	0	0.216479	0.111546	0.492686	0.687486	0.680552	0.71021	0.724779	0.769871	0.731208	0.716183	0.703512	0.948038	1
PI 18:0;0_20:4;0	0	0.146735	0.113783	0.514494	0.611759	0.653741	0.666827	0.744245	0.723465	0.728794	0.691206	0.756662	0.91476	1
PI 16:0;0_20:4;0	0	0.214374	0.126073	0.522166	0.593214	0.644158	0.684472	0.777968	0.737035	0.700163	0.692904	0.759137	0.948814	1
PI 18:0;0_20:3;0	0	0.250569	0.115074	0.53445	0.636122	0.680698	0.672345	0.751951	0.712702	0.733906	0.714633	0.783579	0.952114	1
PC 18:1;0_18:1;0	0	0.197407	0.122253	0.44799	0.598317	0.611648	0.615232	0.624379	0.69989	0.705393	0.665047	0.740447	0.910703	1
PC 18:1;0_18:2;0	0	0.211155	0.124235	0.472924	0.565491	0.65638	0.615053	0.663892	0.702478	0.723903	0.758392	0.774315	1	0.956632
PC 16:0;0_18:1;0	0	0.199629	0.131157	0.614929	0.632674	0.672223	0.679689	0.674604	0.769685	0.781499	0.768825	1	0.947241	0.991551
PC 16:0;0_20:4;0	0	0.229028	0.126351	0.551146	0.734493	0.68302	0.678901	0.710006	0.781373	0.83077	0.911974	0.854651	0.965953	1
PI 18:0;0_18:2;0	0	0	0	0.403655	0.565164	0.70421	0.682642	0.734417	0.802507	0.800482	0.736925	0.775207	1	0.887387
PI 18:1;0_18:1;0	0	0	0	0.36982	0.604249	0.781849	0.788624	0.618454	0.773301	0.824821	0.675946	0.806913	0.962833	1
PI 16:0;0_20:3;0	0	0	0.193339	0.525663	0.626207	0.667778	0.658474	0.864549	0.746932	0.711774	0.692336	0.788605	0.987282	1
PC 18:0;0_22:6;0	0.037139	0	0.117433	0.51302	0.681079	0.707445	0.735527	0.715101	0.655377	0.702368	0.76338	0.785013	0.970329	1
PC 16:1;0_18:1;0	0.0398422	0	0.183152	0.396378	0.597276	0.708552	0.680701	0.757442	0.757612	0.75801	0.826041	0.808936	0.921684	1
PI 18:1;0_20:4;0	0	0	0.138988	0.368907	0.608348	0.623112	0.69566	0.755916	0.708924	0.71348	0.733017	0.785728	0.987594	1
PC 18:1;0_20:4;0	0.0210653	0	0.164124	0.471149	0.666723	0.645567	0.616408	0.562678	0.779157	0.597148	0.619593	0.924224	1	0.913264
PC 18:1;0_20:3;0	0	0	0.146788	0.404144	0.651993	0.652498	0.616881	0.582926	0.703586	0.650606	0.660985	0.766995	0.885152	1
PC 18:1;0_22:6;0	0	0	0.143792	0.385753	0.584777	0.603526	0.663843	0.613452	0.735976	0.699567	0.675466	0.834534	0.947245	1
Cer 34:1;2	0	0	0	0.652559	0.718397	0.77584	0.849862	1	0.921565	0.82561	0.793135	0.65748	0.612719	0
LPC 18:1;0	0.0979405	0	0.235361	1	0.670671	0.81819	0.628822	0.636518	0.355221	0.550378	0.618053	0.61651	0.45546	0
SM 42:1;2	0	0	0.184027	0.618051	1	0.761327	0.649612	0.694801	0.767448	0.675129	0.629119	0.568889	0	0
SM 42:2;2	0	0	0.165266	0.703008	1	0.784104	0.604867	0.61714	0.667841	0.590435	0.507251	0.488321	0	0
LPC 16:0;0	0	0.113481	0.151544	1	0.521356	0.495471	0.471365	0.321306	0.189146	0.265898	0.327159	0.340301	0.183405	0.914526
SM 34:1;2	0	0	0.116369	0.789005	1	0.681731	0.664837	0.776823	0.634466	0.584254	0.518566	0.410192	0.271819	0.642922
Chol	0	0.207344	0.138836	1	0.986812	0.782788	0.731858	0.706658	0.687914	0.643834	0.565841	0.603968	0.40567	0.533641
SM 40:1;2	0.0200102	0	0.161773	0.816359	1	0.753793	0.631904	0.682274	0.783647	0.724698	0.663639	0.651803	0.300214	0.429108
PC 16:0;0_16:0;0	0.0493053	0	0.16051	0.749236	0.892453	0.802089	0.705009	0.71218	0.758005	0.63847	0.71701	0.636183	0.468819	1
LPC 18:0;0	0	0.132917	0.0951712	0.905974	0.616994	0.639183	0.587297	0.48839	0.411095	0.34706	0.417839	0.461196	0.378184	1
LPE 16:0;0	0.023801	0	0.163032	0.860134	0.659682	0.713848	0.689978	0.585021	0.459276	0.596495	0.589346	0.646027	0.424632	1
DAG 18:1;0_20:3;0	0.844136	0	0.965	0.984212	0.506696	0.361215	0.495119	0.650021	1	0.789857	0.730678	0.630586	0.384061	0
LPE 20:4;0	0.187028	0.984735	0.400974	0.870069	0	0.646102	0.444474	0.608297	0.359488	0.79853	1	0.892878	0.502074	0

## Sheet: 06_E
feature	CC_Cytosol	CC_ER	CC_Golgi	CC_Lysosome	CC_Mitochondria	CC_Nucleus	CC_Peroxisome	CC_PM	CC_Endosome	CC_LD
TAG 58:9;0	0	0	0	0	0	0	0	0	0.564206	0.435794
SM 42:2;2	0	0	0	0	0	0	0	0	1	0
SM 42:1;2	0	0	0	0	0	0	0	0	1	0
SM 39:1;3	0	0	0	0	0	0	0	0	1	0
SM 40:1;2	0	0	0	0	0	0	0	0	1	0
SM 36:2;3	0.437978	0	0	0	0	0.562022	0	0	0	0
SM 34:1;2	0	0	0	0	0	1	0	0	0	0
PC 16:0;0_16:1;0	0	0	0	0	0	1	0	0	0	0
PC 16:0;0_16:0;0	0	0	0	0	0	1	0	0	0	0
LPE 16:0;0	0	0	0	0	0	1	0	0	0	0
LPC 18:0;0	0	0	0	0	0	1	0	0	0	0
Chol	0	0	0	0	0	1	0	0	0	0
DAG 16:0;0_18:2;0	0	0	0	0	0	1	0	0	0	0
DAG 16:0;0_20:1;0	0	0	0.489947	0.510053	0	0	0	0	0	0
PG 18:1;0_18:1;0	0	0	0	0.588703	0	0.411297	0	0	0	0
PS 16:0;0_22:6;0	0	0	0	1	0	0	0	0	0	0
LPS 22:6;0	0.735636	0	0.264364	0	0	0	0	0	0	0
DAG 16:0;0_16:0;0	0.751498	0	0.248502	0	0	0	0	0	0	0
CE 16:1;0	0.764151	0	0.235849	0	0	0	0	0	0	0
TAG 52:1;0	0.766418	0	0.233582	0	0	0	0	0	0	0
CE 18:0;0	0.573028	0	0.426972	0	0	0	0	0	0	0
DAG 18:1;0_18:1;0	0.704622	0	0.295378	0	0	0	0	0	0	0
TAG 40:0;0	0.688961	0	0.311039	0	0	0	0	0	0	0
TAG 46:3;0	0.689044	0	0.310956	0	0	0	0	0	0	0
CE 18:1;0	0.646745	0	0.353255	0	0	0	0	0	0	0
DAG 16:1;0_18:1;0	0.660989	0	0.339011	0	0	0	0	0	0	0
DAG 14:0;0_18:1;0	0.658778	0	0.341222	0	0	0	0	0	0	0
DAG 16:0;0_16:1;0	0.656542	0	0.343458	0	0	0	0	0	0	0
LPC 18:1;0	0.657461	0	0.342539	0	0	0	0	0	0	0
DAG 16:0;0_18:1;0	0.629508	0	0.370492	0	0	0	0	0	0	0
TAG 54:7;0	0.61748	0	0.38252	0	0	0	0	0	0	0
TAG 52:4;0	0.333592	0	0.466493	0	0	0	0	0	0	0.199916
TAG 44:1;0	0.352601	0	0.472224	0	0	0	0	0	0	0.175175
TAG 53:3;0	0.338583	0	0.487673	0	0	0	0	0	0	0.173744
TAG 51:2;0	0.342681	0	0.473581	0	0	0	0	0	0	0.183738
TAG 56:2;0	0.339998	0	0.473206	0	0	0	0	0	0	0.186796
TAG 52:2;0	0.33332	0	0.478336	0	0	0	0	0	0	0.188344
TAG 54:2;0	0.331021	0	0.483282	0	0	0	0	0	0	0.185697
TAG 56:3;0	0.356447	0	0.435613	0	0	0	0	0	0	0.20794
TAG 46:1;0	0.369148	0	0.457285	0	0	0	0	0	0	0.173567
TAG 48:1;0	0.369744	0	0.45375	0	0	0	0	0	0	0.176506
TAG 50:2;0	0.369884	0	0.451407	0	0	0	0	0	0	0.178709
TAG 48:2;0	0.376367	0	0.443426	0	0	0	0	0	0	0.180207
TAG 50:1;0	0.383832	0	0.440586	0	0	0	0	0	0	0.175582
TAG 54:1;0	0.375547	0	0.42707	0	0	0	0	0	0	0.197383
TAG 50:3;0	0.389411	0	0.423944	0	0	0	0	0	0	0.186645
TAG 52:3;0	0.390446	0	0.427773	0	0	0	0	0	0	0.181781
TAG 46:2;0	0.386318	0	0.427713	0	0	0	0	0	0	0.185968
TAG 54:3;0	0.38612	0	0.43044	0	0	0	0	0	0	0.183439
TAG 42:0;0	0.459538	0	0.35938	0	0	0	0	0	0	0.181081
TAG 46:0;0	0.453886	0	0.345262	0	0	0	0	0	0	0.200852
TAG 54:6;0	0.437281	0	0.357633	0	0	0	0	0	0	0.205085
TAG 56:6;0	0.445787	0	0.361012	0	0	0	0	0	0	0.193201
TAG 44:0;0	0.422652	0	0.374593	0	0	0	0	0	0	0.202755
TAG 56:5;0	0.424914	0	0.373037	0	0	0	0	0	0	0.202049
TAG 52:5;0	0.417319	0	0.375227	0	0	0	0	0	0	0.207454
TAG 54:5;0	0.413749	0	0.373149	0	0	0	0	0	0	0.213103
TAG 54:4;0	0.408229	0	0.399963	0	0	0	0	0	0	0.191808
TAG 48:3;0	0.421228	0	0.385652	0	0	0	0	0	0	0.19312
TAG 50:4;0	0.420559	0	0.392272	0	0	0	0	0	0	0.187169
TAG 56:4;0	0.420518	0	0.390574	0	0	0	0	0	0	0.188907
TAG 56:8;0	0.499557	0	0.286678	0	0	0	0	0	0	0.213765
TAG 48:0;0	0.464379	0	0.319195	0	0	0	0	0	0	0.216427
TAG 56:7;0	0.49358	0	0.324845	0	0	0	0	0	0	0.181575
DAG 18:1;0_20:1;0	0.460633	0	0.539367	0	0	0	0	0	0	0
TAG 44:2;0	0.457691	0	0.542309	0	0	0	0	0	0	0
TAG 49:1;0	0.421498	0	0.578502	0	0	0	0	0	0	0
TAG 53:2;0	0.434075	0	0.565925	0	0	0	0	0	0	0
CE 16:0;0	0.389228	0	0.610772	0	0	0	0	0	0	0
TAG 42:1;0	0.32527	0	0.67473	0	0	0	0	0	0	0
TAG 48:4;0	0.349713	0	0.650287	0	0	0	0	0	0	0
CE 17:1;0	0.620873	0	0	0	0	0	0	0	0.379127	0
TAG 56:1;0	0.647562	0	0	0	0	0	0	0	0	0.352438
TAG 50:0;0	1	0	0	0	0	0	0	0	0	0
DAG 18:1;0_18:2;0	1	0	0	0	0	0	0	0	0	0
DAG 18:0;0_18:1;0	1	0	0	0	0	0	0	0	0	0
CE 18:2;0	1	0	0	0	0	0	0	0	0	0
CE 20:4;0	1	0	0	0	0	0	0	0	0	0
DAG 16:0;0_18:0;0	0.839284	0	0	0	0	0.160716	0	0	0	0
SM 29:1;3	0.844096	0	0	0	0	0.155904	0	0	0	0
SM 38:3;2	0.726101	0	0	0	0	0.273899	0	0	0	0
SM 29:0;2	0.774965	0	0	0	0	0.225035	0	0	0	0
SM 37:1;2	0.774965	0	0	0	0	0.225035	0	0	0	0
SM 43:3;2	0	0	0.157331	0	0	0	0	0	0	0.842669
SM 39:3;2	0	0	0.242138	0	0	0	0	0	0	0.757862
TAG 51:4;0	0	0	0.218846	0	0	0	0	0	0	0.781154
TAG 36:0;0	0	0	0.431885	0	0	0	0	0	0	0.568115
TAG 55:3;0	0	0	0.435711	0	0	0	0	0	0	0.564289
TAG 55:4;0	0	0	0.36265	0	0	0	0	0	0	0.63735
TAG 58:4;0	0	0	0.370951	0	0	0	0	0	0	0.629049
TAG 45:1;0	0	0	0.503978	0	0	0	0	0	0	0.496022
TAG 49:3;0	0	0	0.507517	0	0	0	0	0	0	0.492483
TAG 44:3;0	0	0	0.629411	0	0	0	0	0	0	0.370589
TAG 58:5;0	0	0	0.583511	0	0	0	0	0	0	0.416489
LPA 20:2;0	0	0	0.330468	0	0	0.387513	0	0	0	0.282018
LPC 16:0;0	0	0	0.46303	0	0	0.53697	0	0	0	0
LPC 18:2;0	0	0	0.533575	0	0	0.466425	0	0	0	0
DAG 12:0;0_18:1;0	0	0	0.57981	0	0	0	0	0	0.42019	0
DAG 14:0;0_16:1;0	0	0	0.463293	0	0	0	0	0	0.536707	0
LPC 20:3;0	0	0	0.741586	0	0.258414	0	0	0	0	0
LPC 22:6;0	0	0	0.535142	0	0.464858	0	0	0	0	0
TAG 58:8;0	0	0	1	0	0	0	0	0	0	0
TAG 58:7;0	0	0	1	0	0	0	0	0	0	0
TAG 58:3;0	0	0	1	0	0	0	0	0	0	0
TAG 53:4;0	0	0	1	0	0	0	0	0	0	0
TAG 52:6;0	0	0	1	0	0	0	0	0	0	0
TAG 51:3;0	0	0	1	0	0	0	0	0	0	0
TAG 51:1;0	0	0	1	0	0	0	0	0	0	0
TAG 50:6;0	0	0	1	0	0	0	0	0	0	0
TAG 50:5;0	0	0	1	0	0	0	0	0	0	0
TAG 40:1;0	0	0	1	0	0	0	0	0	0	0
LPC 20:4;0	0	0	1	0	0	0	0	0	0	0
LPC 16:1;0	0	0	1	0	0	0	0	0	0	0
DAG 18:2;0_18:2;0	0	0	1	0	0	0	0	0	0	0
DAG 18:1;0_18:3;0	0	0	1	0	0	0	0	0	0	0
DAG 16:1;0_18:2;0	0	0	1	0	0	0	0	0	0	0
DAG 16:1;0_16:1;0	0	0	1	0	0	0	0	0	0	0
DAG 14:1;0_16:0;0	0	0	1	0	0	0	0	0	0	0
DAG 14:0;0_16:0;0	0	0	1	0	0	0	0	0	0	0
DAG 14:0;0_18:2;0	0	0	1	0	0	0	0	0	0	0
SM 41:3;2	0	0	0.744369	0	0	0	0	0	0	0.255631
TAG 49:2;0	0	0	0.740082	0	0	0	0	0	0	0.259918
TAG 47:1;0	0	0	0.77429	0	0	0	0	0	0	0.22571
TAG 38:0;0	0	0	0.76556	0	0	0	0	0	0	0.23444
TAG 42:2;0	0	0	0.769399	0	0	0	0	0	0	0.230601
TAG 47:2;0	0	0	0.789761	0	0	0	0	0	0	0.210239
TAG 58:6;0	0	0	0.800203	0	0	0	0	0	0	0.199797
LPG 16:0;0	0	0	0.193197	0	0.491037	0	0.315766	0	0	0
LPS 18:0;0	0	0	0	0	0.611039	0	0.388961	0	0	0
PS 18:2;0_20:3;0	0	0	0	0	0.612838	0	0.387162	0	0	0
PE 18:0;0_20:5;0	0	0	0	0	0.582968	0	0.417032	0	0	0
PC 16:1;0_20:3;0	0	0	0	0	0.566693	0	0.433307	0	0	0
PE 18:2;0_18:2;0	0	0	0	0	0.573269	0	0.426731	0	0	0
PG 16:0;0_18:1;0	0	0	0	0	0.57278	0	0.42722	0	0	0
PC 18:1;0_20:1;0	0	0	0	0	0.243955	0	0.756045	0	0	0
LPE 20:4;0	0	0	0	0	0.199027	0	0.800973	0	0	0
DAG 18:0;0_20:4;0	0	0	0	0	0.167127	0	0.832873	0	0	0
PE 16:0;0_20:4;0	0	0	0	0	0.160717	0	0.839283	0	0	0
LPI 20:4;0	0	0	0	0	0.417558	0	0.582442	0	0	0
PC 20:4;0_20:4;0	0	0	0	0	0.433461	0	0.566539	0	0	0
PG 16:0;0_18:2;0	0	0	0	0	0.37651	0	0.62349	0	0	0
PC 20:1;0_20:4;0	0	0	0	0	0.332872	0	0.667128	0	0	0
PE 18:0;0_20:4;0	0	0	0	0	0.343444	0	0.656556	0	0	0
PI 20:0;0_20:4;0	0	0	0	0	0	0	1	0	0	0
PE 18:1;0_20:3;0	0	0	0	0	0	0	1	0	0	0
PE 18:0;0_22:6;0	0	0	0	0	0	0	1	0	0	0
PE 18:0;0_22:5;0	0	0	0	0	0	0	1	0	0	0
PE 18:0;0_18:2;0	0	0	0	0	0	0	1	0	0	0
PE 16:0;0_22:6;0	0	0	0	0	0	0	1	0	0	0
PE 16:0;0_22:5;0	0	0	0	0	0	0	1	0	0	0
PE 16:0;0_20:3;0	0	0	0	0	0	0	1	0	0	0
PE 16:0;0_18:2;0	0	0	0	0	0	0	1	0	0	0
PE 16:0;0_18:1;0	0	0	0	0	0	0	1	0	0	0
DAG 18:0;0_18:2;0	0	0	0	0	0	0	1	0	0	0
PC 16:0;0_20:2;0	0	0	0	0	0	0	1	0	0	0
PC 18:0;0_18:1;0	0	0	0	0	0	0.477361	0.522639	0	0	0
PC 18:1;0_18:2;0	0	0	0	0	0	0.273239	0.726761	0	0	0
LPE 18:0;0	0	0	0	0	0	0.26983	0.73017	0	0	0
PC 16:0;0_22:6;0	0	0	0	0	0	0.266082	0.733918	0	0	0
PC 18:0;0_20:4;0	0	0	0	0	0	0.266856	0.733144	0	0	0
PC 16:0;0_18:1;0	0	0	0	0	0	0.251387	0.748613	0	0	0
PC 16:0;0_20:4;0	0	0	0	0	0	0.260064	0.739936	0	0	0
PC 18:0;0_20:3;0	0	0	0	0	0	0.306147	0.693853	0	0	0
PC 16:0;0_18:2;0	0	0	0	0	0	0.308461	0.691539	0	0	0
PC 18:1;0_18:1;0	0	0	0	0	0	0.308478	0.691522	0	0	0
PC 16:0;0_20:3;0	0	0	0	0	0	0.285069	0.714931	0	0	0
PC 18:1;0_20:4;0	0	0	0	0	0	0.286885	0.713115	0	0	0
LPI 18:0;0	0	0	0	0	0	0.29978	0.70022	0	0	0
PC 18:1;0_20:3;0	0	0	0	0	0	0.29319	0.70681	0	0	0
PI 16:0;0_20:4;0	0	0	0	0	0	0.344175	0.655825	0	0	0
PC 16:0;0_22:5;0	0	0	0	0	0	0.319495	0.680505	0	0	0
PI 18:0;0_20:3;0	0	0	0	0	0	0.318934	0.681066	0	0	0
PC 18:0;0_18:2;0	0	0	0	0	0	0.3274	0.6726	0	0	0
PI 18:0;0_20:4;0	0	0	0	0	0	0.331231	0.668769	0	0	0
PC 18:0;0_22:6;0	0	0.387909	0	0	0	0.196139	0.415952	0	0	0
DAG 16:0;0_20:4;0	0	0.45337	0	0	0	0.145347	0.401283	0	0	0
PE 18:0;0_20:3;0	0	0.40459	0	0	0	0.151627	0.443782	0	0	0
PE 18:1;0_18:1;0	0	0.419143	0	0	0	0.153206	0.427651	0	0	0
PI 18:1;0_18:2;0	0	0.61427	0	0	0	0	0.38573	0	0	0
PC 16:1;0_22:6;0	0	0.609585	0	0	0	0	0.390415	0	0	0
PE 16:1;0_22:6;0	0	0.607712	0	0	0	0	0.392288	0	0	0
PC 16:0;0_18:3;0	0	0.638923	0	0	0	0	0.361077	0	0	0
PI 18:1;0_20:3;0	0	0.646323	0	0	0	0	0.353677	0	0	0
PI 16:0;0_20:3;0	0	0.496569	0	0	0	0	0.503431	0	0	0
PC 16:1;0_18:2;0	0	0.490106	0	0	0	0	0.509894	0	0	0
PE 18:0;0_18:1;0	0	0.487074	0	0	0	0	0.512926	0	0	0
PE 16:1;0_20:4;0	0	0.478377	0	0	0	0	0.521623	0	0	0
PE 18:1;0_18:2;0	0	0.466426	0	0	0	0	0.533574	0	0	0
PE 18:1;0_22:5;0	0	0.562418	0	0	0	0	0.437582	0	0	0
PC 18:2;0_20:3;0	0	0.566854	0	0	0	0	0.433146	0	0	0
PI 18:1;0_18:1;0	0	0.56536	0	0	0	0	0.43464	0	0	0
PC 16:0;0_22:4;0	0	0.594019	0	0	0	0	0.405981	0	0	0
PC 18:1;0_20:2;0	0	0.581916	0	0	0	0	0.418084	0	0	0
PI 18:0;0_18:2;0	0	0.582981	0	0	0	0	0.417019	0	0	0
PC 16:1;0_20:4;0	0	0.53636	0	0	0	0	0.46364	0	0	0
PC 18:1;0_22:6;0	0	0.536003	0	0	0	0	0.463997	0	0	0
PI 18:2;0_18:2;0	0	0.548303	0	0	0	0	0.451697	0	0	0
PC 16:1;0_18:0;0	0	0.545156	0	0	0	0	0.454844	0	0	0
PE 16:0;0_20:5;0	0	0.542112	0	0	0	0	0.457888	0	0	0
PE 16:1;0_18:1;0	0	0.509177	0	0	0	0	0.490823	0	0	0
PE 18:1;0_20:5;0	0	0.523654	0	0	0	0	0.476346	0	0	0
DAG 16:0;0_20:3;0	0	0.391965	0	0	0	0	0.608035	0	0	0
PE 18:1;0_20:4;0	0	0.383312	0	0	0	0	0.616688	0	0	0
PC 18:2;0_20:4;0	0	0.432683	0	0	0	0	0.567317	0	0	0
PE O-22:0;0/16:0;0	0	0.40657	0	0	0	0	0.59343	0	0	0
PC 18:1;0_22:5;0	0	0.424366	0	0	0	0	0.575634	0	0	0
PC 18:2;0_18:2;0	0	0.416413	0	0	0	0	0.583587	0	0	0
PE 18:1;0_22:6;0	0	0.418041	0	0	0	0	0.581959	0	0	0
PE 18:2;0_20:4;0	0	0.364203	0	0	0.174412	0	0.461385	0	0	0
PE 16:0;0_16:1;0	0	0.392812	0	0	0.105206	0	0.501983	0	0	0
PE 20:1;0_20:4;0	0	0.457289	0	0	0.113729	0	0.428982	0	0	0
PC 18:0;0_18:3;0	0	0.424241	0	0	0.126244	0	0.449516	0	0	0
PE 16:1;0_18:0;0	0	0.439626	0	0	0.104559	0	0.455815	0	0	0
DAG 18:1;0_22:6;0	0	0.33105	0	0.203128	0	0	0	0.295919	0	0.169904
PC 14:0;0_18:2;0	0	0.48354	0	0.27135	0	0	0	0.24511	0	0
LPG 18:1;0	0	0.3996	0	0.254069	0	0	0	0.346332	0	0
PA 18:0;0_20:4;0	0	0.397564	0	0.28392	0	0	0	0.318517	0	0
PG 18:1;0_18:2;0	0	0.394055	0	0.285006	0	0	0	0.320939	0	0
Cer 41:2;2	0	0.365594	0	0	0	0	0	0.634406	0	0
PE O-16:1;0/22:5;0	0	0.365782	0	0	0	0	0	0.634218	0	0
PC 14:0;0_16:0;0	0	0.37016	0	0	0.167653	0	0	0.462187	0	0
PC 16:0;0_17:1;0	0	0.47419	0	0	0.224697	0	0	0.301113	0	0
PC 18:0;0_22:4;0	0	0.410602	0	0	0	0	0	0.386521	0	0.202878
Cer 42:3;2	0	0.504119	0	0	0	0	0	0.495881	0	0
PS 18:2;0_20:4;0	0	0.651522	0	0	0	0	0	0.348478	0	0
LPE O-14:1;0	0	0.633771	0	0	0	0	0	0.366229	0	0
PE 16:1;0_18:2;0	0	0.638628	0	0	0	0	0	0.361372	0	0
PA 18:1;0_18:2;0	0	0.609189	0	0.390811	0	0	0	0	0	0
PG 18:1;0_22:6;0	0	0.603574	0	0.396426	0	0	0	0	0	0
PC 16:1;0_16:1;0	0	0.432951	0	0	0.329145	0	0	0	0	0.237903
Cer 39:1;2	0	0.790196	0	0	0.209804	0	0	0	0	0
DAG 16:1;0_18:0;0	0	0.76368	0	0	0.23632	0	0	0	0	0
PA 18:0;0_18:2;0	0	0.50424	0	0	0.49576	0	0	0	0	0
PC 18:2;0_20:1;0	0	0.57982	0	0	0.42018	0	0	0	0	0
PC 18:0;0_20:5;0	0	0.671356	0	0	0.328644	0	0	0	0	0
PI 16:0;0_18:2;0	0	0.637562	0	0	0.362438	0	0	0	0	0
PE O-16:1;0/20:4;0	0	0.772496	0	0	0	0.227504	0	0	0	0
PI 18:0;0_22:4;0	0	0.805735	0	0	0	0.194265	0	0	0	0
PG 20:3;0_20:4;0	0	0.593763	0	0	0	0.406237	0	0	0	0
PC 16:0;0_20:1;0	0	0.652269	0	0	0	0.347731	0	0	0	0
PI 16:0;0_18:1;0	0	0.665614	0	0	0	0.334386	0	0	0	0
PC 16:1;0_18:1;0	0	0.725391	0	0	0	0.274609	0	0	0	0
PI 18:1;0_20:4;0	0	0.705685	0	0	0	0.294315	0	0	0	0
PC 16:0;0_20:5;0	0	0.707662	0	0	0	0	0	0	0	0.292338
PS 18:1;0_20:4;0	0	1	0	0	0	0	0	0	0	0
PS 18:0;0_18:2;0	0	1	0	0	0	0	0	0	0	0
PS 16:0;0_20:4;0	0	1	0	0	0	0	0	0	0	0
PI 18:0;0_22:5;0	0	1	0	0	0	0	0	0	0	0
PG 18:0;0_18:2;0	0	1	0	0	0	0	0	0	0	0
PG 16:1;0_18:1;0	0	1	0	0	0	0	0	0	0	0
PE 18:1;0_20:1;0	0	1	0	0	0	0	0	0	0	0
PE 18:0;0_22:4;0	0	1	0	0	0	0	0	0	0	0
PE 18:0;0_20:2;0	0	1	0	0	0	0	0	0	0	0
PE 16:0;0_22:4;0	0	1	0	0	0	0	0	0	0	0
PE 16:0;0_20:1;0	0	1	0	0	0	0	0	0	0	0
PC 18:0;0_22:5;0	0	1	0	0	0	0	0	0	0	0
PC 14:0;0_18:1;0	0	1	0	0	0	0	0	0	0	0
PA 18:1;0_18:1;0	0	1	0	0	0	0	0	0	0	0
PA 16:1;0_18:1;0	0	1	0	0	0	0	0	0	0	0
PA 16:0;0_18:1;0	0	1	0	0	0	0	0	0	0	0
DAG 18:1;0_20:4;0	0	1	0	0	0	0	0	0	0	0
DAG 16:0;0_22:6;0	0	1	0	0	0	0	0	0	0	0
Cer 34:1;2	0	1	0	0	0	0	0	0	0	0
Cer 38:1;2	0	1	0	0	0	0	0	0	0	0
SM 41:1;2	0	0	0	0	0	0	0	1	0	0
PS 18:1;0_18:1;0	0	0	0	0	0	0	0	1	0	0
PS 18:0;0_22:4;0	0	0	0	0	0	0	0	1	0	0
PG 20:4;0_20:4;0	0	0	0	0	0	0	0	1	0	0
PG 18:0;0_20:4;0	0	0	0	0	0	0	0	1	0	0
PG 18:0;0_18:1;0	0	0	0	0	0	0	0	1	0	0
PE O-16:1;0/22:6;0	0	0	0	0	0	0	0	1	0	0
PC 17:0;0_18:2;0	0	0	0	0	0	0	0	1	0	0
HexCer 40:1;2	0	0	0	0	0	0	0	1	0	0
PC 15:0;0_18:2;0	0	0	0	0	0	0	0	1	0	0
PG 16:1;0_18:2;0	0	0	0	0	0	0.396169	0	0.603831	0	0
PS 18:0;0_18:1;0	0	0	0	0	0	0.409057	0	0.590943	0	0
PG 16:1;0_22:6;0	0	0	0	0.61618	0	0	0	0.38382	0	0
PG 18:1;0_20:3;0	0	0	0	0.433506	0	0	0	0.566494	0	0
PG 18:1;0_20:4;0	0	0	0	0.455562	0	0	0	0.544438	0	0
PE 18:1;0_20:2;0	0	0	0	0.447756	0	0	0	0.552244	0	0
PG 18:1;0_22:5;0	0	0	0	0.444634	0	0	0	0.555366	0	0
PG 22:6;0_22:6;0	0	0	0	0.369784	0	0	0	0.630216	0	0
PA 16:0;0_16:1;0	0	0	0	0.40104	0	0	0	0.59896	0	0
PG 18:2;0_22:6;0	0	0	0	0.386037	0	0	0	0.613963	0	0
DAG 18:1;0_20:3;0	0	0	0.294652	0	0	0	0	0.382609	0	0.322739
PS 18:0;0_20:3;0	0	0	0	0	0	0	0	0.532475	0	0.467525
TAG 58:10;0	0	0	0	0	0	0	0	0.547038	0	0.452962
PE O-18:1;0/20:4;0	0	0	0	0	0.284515	0	0	0.470139	0	0.245346
PE O-18:2;0/20:4;0	0	0	0	0	0.156759	0	0	0.543424	0	0.299817
SM 40:2;2	0	0	0	0	0.209265	0	0	0.561506	0	0.229229
PG 16:1;0_20:3;0	0	0	0.208432	0	0	0	0.392181	0.399388	0	0
PG 18:2;0_18:2;0	0	0	0.20888	0	0	0	0.393264	0.397855	0	0
DAG 16:1;0_20:1;0	0	0	0.566258	0	0	0	0	0.433742	0	0
PA 14:0;0_18:1;0	0	0	0.394633	0	0	0	0	0.605367	0	0
PG 16:1;0_18:0;0	0	0	0.302863	0	0	0	0	0.697137	0	0
PI 18:2;0_20:4;0	0	0	0.305266	0	0.694734	0	0	0	0	0
PI 18:0;0_20:2;0	0	0	0	0	0.840931	0.159069	0	0	0	0
PE O-20:1;0/20:4;0	0	0	0	0	1	0	0	0	0	0
PE O-18:1;0/22:4;0	0	0	0	0	1	0	0	0	0	0
PE 20:0;0_20:4;0	0	0	0	0	1	0	0	0	0	0
PE 19:0;0_20:4;0	0	0	0	0	1	0	0	0	0	0
PE 18:2;0_22:6;0	0	0	0	0	1	0	0	0	0	0
PE 17:0;0_20:4;0	0	0	0	0	1	0	0	0	0	0
PE 16:1;0_20:3;0	0	0	0	0	1	0	0	0	0	0
PC 20:3;0_20:4;0	0	0	0	0	1	0	0	0	0	0
PC 16:1;0_17:0;0	0	0	0	0	1	0	0	0	0	0
PC 15:0;0_18:1;0	0	0	0	0	1	0	0	0	0	0
PA 16:0;0_18:2;0	0	0	0	0	1	0	0	0	0	0
CL 74:9;0	0	0	0	0	1	0	0	0	0	0
CL 74:8;0	0	0	0	0	1	0	0	0	0	0
CL 72:8;0	0	0	0	0	1	0	0	0	0	0
CL 72:7;0	0	0	0	0	1	0	0	0	0	0
CL 72:6;0	0	0	0	0	1	0	0	0	0	0
CL 70:7;0	0	0	0	0	1	0	0	0	0	0
CL 70:6;0	0	0	0	0	1	0	0	0	0	0
CL 70:5;0	0	0	0	0	1	0	0	0	0	0
CL 68:5;0	0	0	0	0	1	0	0	0	0	0
CL 70:4;0	0	0	0	0	1	0	0	0	0	0
PC 14:0;0_18:0;0	0	0	0	0	0.638499	0	0	0.361501	0	0
PE 22:6;0_22:6;0	0	0	0	0	0.662117	0	0	0.337883	0	0
PE O-18:2;0/20:3;0	0	0	0	0	0.671671	0	0	0.328329	0	0
PG 16:0;0_16:1;0	0	0	0	0	0.768008	0	0	0.231992	0	0
PE 20:4;0_20:4;0	0	0	0	0	0.720295	0	0	0.279705	0	0
PG 18:0;0_22:6;0	0	0	0	0	0.718733	0	0	0.281267	0	0
PC 18:2;0_22:6;0	0	0	0	0	0.737011	0	0	0.262989	0	0
PE 18:2;0_20:1;0	0	0	0	0	0.732226	0	0	0.267774	0	0
LPE 18:2;0	0	0	0.263685	0	0.382621	0	0	0.353695	0	0
PI 18:0;0_22:6;0	0	0	0.206632	0	0.347284	0	0	0.446084	0	0
PC 17:0;0_18:1;0	0	0	0	0	0.551037	0	0	0.448963	0	0
PE 18:0;0_18:3;0	0	0	0	0	0.50904	0	0	0.49096	0	0
PE 18:0;0_20:1;0	0	0	0	0	0.510278	0	0	0.489722	0	0
PE 16:0;0_18:3;0	0	0	0	0	0.412888	0	0	0.587112	0	0
PE 20:1;0_22:6;0	0	0	0	0	0.482386	0	0	0.517614	0	0
PA 18:1;0_20:3;0	0	0	0	0	0.471192	0	0	0.528808	0	0
SM 38:1;2	0	0	0	0	0.472875	0	0	0.527125	0	0
PI 18:0;0_18:1;0	0	0	0	0	0.450257	0	0	0.549743	0	0
PS 18:0;0_22:5;0	0	0	0	0	0.460812	0	0	0.539188	0	0
DAG 16:0;0_22:5;0	0	0	0	0	0.256321	0	0	0.743679	0	0
PE O-16:1;0/22:4;0	0	0	0	0	0.327648	0	0	0.672352	0	0
SM 36:1;2	0	0	0	0	0.320932	0	0	0.679068	0	0
PC 18:0;0_20:2;0	0	0	0	0	0.466178	0.533822	0	0	0	0
PG 16:0;0_16:0;0	0	0	0	0	0.394194	0.325084	0	0.280722	0	0
PG 20:3;0_20:3;0	0	0	0	0	0.290973	0.337617	0	0.371411	0	0

## Sheet: 06_F
compartment	count
Cytosol	68
Endosome	8
ER	90
Golgi	110
LD	64
Lysosome	18
Mitochondria	83
Nucleus	53
Peroxisome	88
PM	69

## Sheet: 06_G
Fraction	LD_median	TAG 51:4;0	TAG 55:4;0	TAG 58:4;0
lipidomics_median_Fr.1	0.835256	1	1	1
lipidomics_median_Fr.2	0.1065	0	0	0
lipidomics_median_Fr.3	0.0941526	0	0	0
lipidomics_median_Fr.4	0.0359891	0	0	0
lipidomics_median_Fr.5	0.0585619	0	0	0
lipidomics_median_Fr.6	0.255884	0	0	0
lipidomics_median_Fr.7	0.297938	0	0	0.185471
lipidomics_median_Fr.8	0.595169	0	0	0.174152
lipidomics_median_Fr.9	0.486552	0	0	0
lipidomics_median_Fr.10	0.327215	0	0	0
lipidomics_median_Fr.11	0.23503	0	0	0
lipidomics_median_Fr.12	0.12818	0	0	0
lipidomics_median_Fr.13	0.157465	0	0	0
lipidomics_median_Fr.14	0.0189618	0	0	0

## Sheet: 06_H
Fraction	MITOCHONDRIA_median	CL 68:5;0	CL 70:6;0	CL 74:8;0		Fraction	MITOCHONDRIA_median	PE 17:0;0_20:4;0	PE 19:0;0_20:4;0	PE 20:0;0_20:4;0
lipidomics_median_Fr.1	0.0604949	0	0	0		lipidomics_median_Fr.1	0.0604949	0	0	0
lipidomics_median_Fr.2	0	0	0	0		lipidomics_median_Fr.2	0	0	0	0
lipidomics_median_Fr.3	0.163882	0	0	0		lipidomics_median_Fr.3	0.163882	0	0	0
lipidomics_median_Fr.4	0.000505919	0	0	0		lipidomics_median_Fr.4	0.000505919	0	0	0
lipidomics_median_Fr.5	0	0	0	0		lipidomics_median_Fr.5	0	0	0	0
lipidomics_median_Fr.6	0.022303	0	0	0		lipidomics_median_Fr.6	0.022303	0	0	0
lipidomics_median_Fr.7	0.0244676	0	0	0		lipidomics_median_Fr.7	0.0244676	0	0	0
lipidomics_median_Fr.8	0.0748901	0	0	0		lipidomics_median_Fr.8	0.0748901	0	0	0
lipidomics_median_Fr.9	0.0744906	0	0	0		lipidomics_median_Fr.9	0.0744906	0	0	0
lipidomics_median_Fr.10	0.634318	0	0.808203	0.778374		lipidomics_median_Fr.10	0.634318	0.805761	0.749353	0.97842
lipidomics_median_Fr.11	1	1	1	1		lipidomics_median_Fr.11	1	1	1	1
lipidomics_median_Fr.12	0.482749	0.859844	0.872892	0.803155		lipidomics_median_Fr.12	0.482749	0.75955	0	0.89987
lipidomics_median_Fr.13	0.423599	0	0.620409	0.488039		lipidomics_median_Fr.13	0.423599	0	0	0
lipidomics_median_Fr.14	0.0826198	0	0	0		lipidomics_median_Fr.14	0.0826198	0	0	0

## Sheet: 06_I
Fraction	MITOCHONDRIA_median	PG 16:0;0_16:1;0	PG 16:0;0_18:1;0	PG 16:0;0_18:2;0	LPG 16:0;0		Fraction	LYSOSOME_median	PG 18:1;0_20:3;0	PG 18:1;0_20:4;0	PG 18:1;0_22:5;0	LPG 18:1;0
lipidomics_median_Fr.1	0.0604949	0	0	0	0		lipidomics_median_Fr.1	0.113599	0	0	0	0
lipidomics_median_Fr.2	0	0	0	0	0		lipidomics_median_Fr.2	0	0	0	0	0
lipidomics_median_Fr.3	0.163882	0	0.0889413	0	0		lipidomics_median_Fr.3	0.215523	0	0	0	0
lipidomics_median_Fr.4	0.000505919	0	0.128966	0	0		lipidomics_median_Fr.4	0.0254852	0	0	0	0
lipidomics_median_Fr.5	0	0	0	0	0		lipidomics_median_Fr.5	0.0654089	0	0	0	0
lipidomics_median_Fr.6	0.022303	0	0.175748	0.339064	0		lipidomics_median_Fr.6	0.22843	0	0	0	0
lipidomics_median_Fr.7	0.0244676	0	0.198882	0.521578	0		lipidomics_median_Fr.7	0.366872	0	0	0	0.757245
lipidomics_median_Fr.8	0.0748901	0	0.202579	0.418986	0		lipidomics_median_Fr.8	1	0.9884	1	0.847596	1
lipidomics_median_Fr.9	0.0744906	0	0.245352	0.503076	0		lipidomics_median_Fr.9	0.690793	1	0.762159	1	0.673777
lipidomics_median_Fr.10	0.634318	1	0.735727	0.722549	1		lipidomics_median_Fr.10	0.419802	0.522034	0.554096	0.44029	0.650636
lipidomics_median_Fr.11	1	0.987217	1	1	0		lipidomics_median_Fr.11	0.273385	0	0	0	0.504652
lipidomics_median_Fr.12	0.482749	0	0.912374	0.840415	0		lipidomics_median_Fr.12	0.101489	0	0	0	0
lipidomics_median_Fr.13	0.423599	0	0.739465	0.738331	0		lipidomics_median_Fr.13	0.190166	0	0	0	0
lipidomics_median_Fr.14	0.0826198	0	0.434725	0	0		lipidomics_median_Fr.14	0.416359	0	0	0	0

## Sheet: 06_J
KDE Golgi						KDE Lysosome						KDE PM						KDE Endosome
feature	lipid_class	db_norm	length_norm	intensity		feature	lipid_class	db_norm	length_norm	intensity		feature	lipid_class	db_norm	length_norm	intensity		feature	lipid_class	db_norm	length_norm	intensity
CE 16:0;0	CE	0	16	32.2955		DAG 16:0;0_20:1;0	DAG	0.5	18	2.68544		Cer 41:2;2	Cer	1	20.5	0.543591		CE 17:1;0	CE	1	17	10.8314
CE 16:1;0	CE	1	16	21.5538		DAG 18:1;0_22:6;0	DAG	3.5	20	0.905315		Cer 42:3;2	Cer	1.5	21	0.63727		DAG 12:0;0_18:1;0	DAG	0.5	15	3.9841
CE 18:0;0	CE	0	18	6.64898		LPG 18:1;0	LPG	1	18	0.0807468		DAG 16:0;0_22:5;0	DAG	2.5	19	0.986432		DAG 14:0;0_16:1;0	DAG	0.5	15	2.67444
CE 18:1;0	CE	1	18	51.6562		PA 16:0;0_16:1;0	PA	0.5	16	0.70692		DAG 16:1;0_20:1;0	DAG	1	18	0.356464		SM 39:1;3	SM	0.5	19.5	6.69339
DAG 12:0;0_18:1;0	DAG	0.5	15	5.49757		PA 18:0;0_20:4;0	PA	2	19	1.03823		DAG 18:1;0_20:3;0	DAG	2	19	2.32446		SM 40:1;2	SM	0.5	20	18.5994
DAG 14:0;0_16:0;0	DAG	0	15	5.90134		PA 18:1;0_18:2;0	PA	1.5	18	1.35107		DAG 18:1;0_22:6;0	DAG	3.5	20	1.31887		SM 42:1;2	SM	0.5	21	7.5883
DAG 14:0;0_16:1;0	DAG	0.5	15	2.30861		PC 14:0;0_18:2;0	PC	1	16	2.34595		HexCer 40:1;2	HexCer	0.5	20	3.35599		SM 42:2;2	SM	1	21	8.30952
DAG 14:0;0_18:1;0	DAG	0.5	16	9.49615		PG 16:1;0_22:6;0	PG	3.5	19	1.6577		LPE 18:2;0	LPE	2	18	0.23442		TAG 58:9;0	TAG	3	19.3333	2.44524
DAG 14:0;0_18:2;0	DAG	1	16	5.21503		PG 18:1;0_18:1;0	PG	1	18	2.96539		LPE O-14:1;0	LPE O-	1	14	0.607889
DAG 14:1;0_16:0;0	DAG	0.5	15	1.51782		PG 18:1;0_18:2;0	PG	1.5	18	0.232301		LPG 18:1;0	LPG	1	18	0.110069
DAG 16:0;0_16:0;0	DAG	0	16	3.11978		PG 18:1;0_20:3;0	PG	2	19	0.862495		PA 14:0;0_18:1;0	PA	0.5	16	0.723729
DAG 16:0;0_16:1;0	DAG	0.5	16	10.1963		PG 18:1;0_20:4;0	PG	2.5	19	1.29109		PA 16:0;0_16:1;0	PA	0.5	16	1.0558
DAG 16:0;0_18:1;0	DAG	0.5	17	66.1741		PG 18:1;0_22:5;0	PG	3	20	2.89873		PA 18:0;0_20:4;0	PA	2	19	1.16474
DAG 16:0;0_20:1;0	DAG	0.5	18	2.57958		PG 18:1;0_22:6;0	PG	3.5	20	1.61964		PA 18:1;0_20:3;0	PA	2	19	0.483667
DAG 16:1;0_16:1;0	DAG	1	16	7.48523		PG 18:2;0_22:6;0	PG	4	20	0.0722351		PC 14:0;0_16:0;0	PC	0	15	4.15726
DAG 16:1;0_18:1;0	DAG	1	17	19.8599		PG 22:6;0_22:6;0	PG	6	22	0.520181		PC 14:0;0_18:0;0	PC	0	16	0.864785
DAG 16:1;0_18:2;0	DAG	1.5	17	11.401		PS 16:0;0_22:6;0	PS	3	19	19.3074		PC 14:0;0_18:2;0	PC	1	16	2.1191
DAG 16:1;0_20:1;0	DAG	1	18	0.465371								PC 15:0;0_18:2;0	PC	1	16.5	1.87039
DAG 18:1;0_18:1;0	DAG	1	18	36.9714								PC 16:0;0_17:1;0	PC	0.5	16.5	0.371586
DAG 18:1;0_18:3;0	DAG	2	18	7.58458								PC 17:0;0_18:1;0	PC	0.5	17.5	2.67901
DAG 18:1;0_20:1;0	DAG	1	19	6.30522								PC 17:0;0_18:2;0	PC	1	17.5	3.90264
DAG 18:1;0_20:3;0	DAG	2	19	1.7901								PC 18:0;0_22:4;0	PC	2	20	3.99816
DAG 18:2;0_18:2;0	DAG	2	18	5.64163								PC 18:2;0_22:6;0	PC	4	20	2.54405
LPA 20:2;0	LPA	2	20	1.34641								PE 16:0;0_18:3;0	PE	1.5	17	0.561785
LPC 16:0;0	LPC	0	16	14.82								PE 16:1;0_18:2;0	PE	1.5	17	0.321659
LPC 16:1;0	LPC	1	16	0.433696								PE 18:0;0_18:3;0	PE	1.5	18	0.586817
LPC 18:1;0	LPC	1	18	2.51724								PE 18:0;0_20:1;0	PE	0.5	19	1.55815
LPC 18:2;0	LPC	2	18	2.14747								PE 18:2;0_20:1;0	PE	1.5	19	0.971722
LPC 20:3;0	LPC	3	20	0.871351								PE 20:1;0_22:6;0	PE	3.5	21	2.12792
LPC 20:4;0	LPC	4	20	2.56286								PE 20:4;0_20:4;0	PE	4	20	0.960766
LPC 22:6;0	LPC	6	22	0.54169								PE 22:6;0_22:6;0	PE	6	22	0.727699
LPE 18:2;0	LPE	2	18	0.174763								PE O-16:1;0/22:4;0	PE O-	2.5	19	1.21189
LPG 16:0;0	LPG	0	16	0.0414073								PE O-16:1;0/22:5;0	PE O-	3	19	1.39885
LPS 22:6;0	LPS	6	22	0.561754								PE O-16:1;0/22:6;0	PE O-	3.5	19	3.75812
PA 14:0;0_18:1;0	PA	0.5	16	0.471792								PE O-18:1;0/20:4;0	PE O-	2.5	19	1.73701
PG 16:1;0_18:0;0	PG	0.5	17	0.282218								PE O-18:2;0/20:3;0	PE O-	2.5	19	0.207656
PG 16:1;0_20:3;0	PG	2	18	0.200941								PE O-18:2;0/20:4;0	PE O-	3	19	2.16853
PG 18:2;0_18:2;0	PG	2	18	0.432356								PG 16:0;0_16:0;0	PG	0	16	0.615894
PI 18:0;0_22:6;0	PI	3	20	0.938119								PG 16:0;0_16:1;0	PG	0.5	16	0.255109
PI 18:2;0_20:4;0	PI	3	19	1.54125								PG 16:1;0_18:0;0	PG	0.5	17	0.649614
SM 39:3;2	SM	1.5	19.5	0.193734								PG 16:1;0_18:2;0	PG	1.5	17	1.31165
SM 41:3;2	SM	1.5	20.5	2.40885								PG 16:1;0_20:3;0	PG	2	18	0.385034
TAG 36:0;0	TAG	0	12	0.79074								PG 16:1;0_22:6;0	PG	3.5	19	1.03258
TAG 38:0;0	TAG	0	12.6667	3.172								PG 18:0;0_18:1;0	PG	0.5	18	2.29292
TAG 40:0;0	TAG	0	13.3333	3.53003								PG 18:0;0_20:4;0	PG	2	19	0.26325
TAG 40:1;0	TAG	0.333333	13.3333	8.68491								PG 18:0;0_22:6;0	PG	3	20	0.641623
TAG 42:0;0	TAG	0	14	10.7173								PG 18:1;0_18:2;0	PG	1.5	18	0.26159
TAG 42:1;0	TAG	0.333333	14	28.8791								PG 18:1;0_20:3;0	PG	2	19	1.12708
TAG 42:2;0	TAG	0.666667	14	5.47022								PG 18:1;0_20:4;0	PG	2.5	19	1.54297
TAG 44:0;0	TAG	0	14.6667	17.3429								PG 18:1;0_22:5;0	PG	3	20	3.62064
TAG 44:1;0	TAG	0.333333	14.6667	66.942								PG 18:2;0_18:2;0	PG	2	18	0.82351
TAG 44:2;0	TAG	0.666667	14.6667	16.8953								PG 18:2;0_22:6;0	PG	4	20	0.114884
TAG 44:3;0	TAG	1	14.6667	0.986906								PG 20:3;0_20:3;0	PG	3	20	0.10497
TAG 45:1;0	TAG	0.333333	15	2.3472								PG 20:4;0_20:4;0	PG	4	20	0.73063
TAG 46:0;0	TAG	0	15.3333	20.1216								PG 22:6;0_22:6;0	PG	6	22	0.886535
TAG 46:1;0	TAG	0.333333	15.3333	193.2								PI 18:0;0_18:1;0	PI	0.5	18	1.33839
TAG 46:2;0	TAG	0.666667	15.3333	69.2201								PI 18:0;0_22:6;0	PI	3	20	2.02524
TAG 46:3;0	TAG	1	15.3333	6.25837								PS 18:0;0_18:1;0	PS	0.5	18	0.786988
TAG 47:1;0	TAG	0.333333	15.6667	7.3246								PS 18:0;0_20:3;0	PS	1.5	19	2.41086
TAG 47:2;0	TAG	0.666667	15.6667	4.4302								PS 18:0;0_22:4;0	PS	2	20	3.75827
TAG 48:0;0	TAG	0	16	18.5884								PS 18:0;0_22:5;0	PS	2.5	20	4.69284
TAG 48:1;0	TAG	0.333333	16	295.472								PS 18:1;0_18:1;0	PS	1	18	0.618052
TAG 48:2;0	TAG	0.666667	16	248.026								PS 18:2;0_20:4;0	PS	3	19	8.61524
TAG 48:3;0	TAG	1	16	33.5603								SM 36:1;2	SM	0.5	18	3.50492
TAG 48:4;0	TAG	1.33333	16	6.32084								SM 38:1;2	SM	0.5	19	1.43341
TAG 49:1;0	TAG	0.333333	16.3333	10.8478								SM 40:2;2	SM	1	20	2.33963
TAG 49:2;0	TAG	0.666667	16.3333	16.8019								SM 41:1;2	SM	0.5	20.5	2.70995
TAG 49:3;0	TAG	1	16.3333	2.15427								TAG 58:10;0	TAG	3.33333	19.3333	1.06619
TAG 50:1;0	TAG	0.333333	16.6667	423.305
TAG 50:2;0	TAG	0.666667	16.6667	867.462
TAG 50:3;0	TAG	1	16.6667	201.916
TAG 50:4;0	TAG	1.33333	16.6667	23.7123
TAG 50:5;0	TAG	1.66667	16.6667	9.36148
TAG 50:6;0	TAG	2	16.6667	4.32428
TAG 51:1;0	TAG	0.333333	17	12.4261
TAG 51:2;0	TAG	0.666667	17	30.2696
TAG 51:3;0	TAG	1	17	20.5206
TAG 51:4;0	TAG	1.33333	17	1.09336
TAG 52:1;0	TAG	0.333333	17.3333	7.59188
TAG 52:2;0	TAG	0.666667	17.3333	1867.97
TAG 52:3;0	TAG	1	17.3333	630.706
TAG 52:4;0	TAG	1.33333	17.3333	130.028
TAG 52:5;0	TAG	1.66667	17.3333	20.2083
TAG 52:6;0	TAG	2	17.3333	12.6997
TAG 53:2;0	TAG	0.666667	17.6667	15.7942
TAG 53:3;0	TAG	1	17.6667	12.2499
TAG 53:4;0	TAG	1.33333	17.6667	7.98229
TAG 54:1;0	TAG	0.333333	18	17.0846
TAG 54:2;0	TAG	0.666667	18	151.098
TAG 54:3;0	TAG	1	18	311.373
TAG 54:4;0	TAG	1.33333	18	116.593
TAG 54:5;0	TAG	1.66667	18	49.6403
TAG 54:6;0	TAG	2	18	21.4095
TAG 54:7;0	TAG	2.33333	18	9.01813
TAG 55:3;0	TAG	1	18.3333	2.99575
TAG 55:4;0	TAG	1.33333	18.3333	1.73673
TAG 56:2;0	TAG	0.666667	18.6667	18.6938
TAG 56:3;0	TAG	1	18.6667	40.595
TAG 56:4;0	TAG	1.33333	18.6667	21.0337
TAG 56:5;0	TAG	1.66667	18.6667	22.0657
TAG 56:6;0	TAG	2	18.6667	22.7628
TAG 56:7;0	TAG	2.33333	18.6667	23.125
TAG 56:8;0	TAG	2.66667	18.6667	5.5348
TAG 58:3;0	TAG	1	19.3333	12.1127
TAG 58:4;0	TAG	1.33333	19.3333	2.30363
TAG 58:5;0	TAG	1.66667	19.3333	4.57453
TAG 58:6;0	TAG	2	19.3333	8.38059
TAG 58:7;0	TAG	2.33333	19.3333	15.2263
TAG 58:8;0	TAG	2.66667	19.3333	11.9208
