# Supplementary material for: C-COMPASS: a user-friendly neural network tool profiles cell compartments at protein and lipid levels
Source: Nat Methods. 2025 Dec 4;23(1):118–30. doi: 10.1038/s41592-025-02880-3 (PMC12791020; doi:10.1038/s41592-025-02880-3)
Supplement: Supplementary file 23 — Comparison with Klingelhuber et al. [file 41592_2025_2880_MOESM23_ESM.xlsx]

## Sheet: E02_A_Cytosol
NN outputs for markers (Cytosol)
Cytosol	ER	Golgi	Lysosome	Mitochondria	Nucleus	Peroxisome	PM	Endosome	LD	Protein-Complex	Translation
0.887802	0.00305209	0.00230983	0.00479735	0.0058338	0.0471839	0.00547762	0.00570374	0.00480234	0.00453704	0.0237476	0.00475241
0.618457	0.00324079	0.00294401	0.0047485	0.00353111	0.00612193	0.00360717	0.00374312	0.0152431	0.0266254	0.305888	0.00584991
0.817605	0.00275964	0.00314411	0.00326773	0.00324798	0.0178435	0.00317029	0.00480878	0.0432067	0.0252894	0.0609913	0.0146652
0.731073	0.00316424	0.00437856	0.00293609	0.00216572	0.0065288	0.00363153	0.00523081	0.025446	0.00899754	0.202322	0.00412617
0.806306	0.00295163	0.00341931	0.00353452	0.0026745	0.0128886	0.00502272	0.00480979	0.0162559	0.0190849	0.11972	0.00333208
0.301444	0.00839303	0.0121574	0.00539038	0.00143693	0.0017676	0.00272814	0.00730918	0.0771983	0.0294527	0.438196	0.114526
0.911589	0.00322246	0.00273268	0.00314305	0.00423333	0.00692132	0.00535736	0.00642322	0.01183	0.0136263	0.0263496	0.0045715
0.852261	0.00238137	0.00486537	0.00261433	0.00506109	0.0195161	0.00402806	0.00723902	0.0121392	0.00543002	0.0800967	0.00436825
0.867217	0.00327342	0.00337651	0.00800479	0.00392108	0.032102	0.00729837	0.0182363	0.0154612	0.0253842	0.0114146	0.00431087
0.906716	0.00316907	0.00321853	0.00333711	0.00462653	0.00928106	0.00482863	0.00589692	0.0067773	0.0195077	0.0284011	0.00424028
0.89853	0.00230324	0.00341602	0.0036375	0.00428936	0.00739216	0.00414504	0.00364571	0.0202784	0.00351088	0.0427907	0.00606147
0.780457	0.00224811	0.00180829	0.00742464	0.0336588	0.10944	0.00845696	0.0103393	0.0138926	0.00935393	0.0169573	0.00596371
0.0325947	0.00465649	0.00412435	0.0103781	0.00431304	0.00796454	0.00118754	0.00132043	0.0227118	0.0102978	0.700043	0.200409
0.350396	0.00462822	0.0044261	0.0358767	0.0107232	0.103947	0.0247047	0.256145	0.034293	0.16239	0.00872636	0.00374359
0.940736	0.0033963	0.00331356	0.00336555	0.00404031	0.0058121	0.00533458	0.00568753	0.00628621	0.00578813	0.0123825	0.00385702
0.92608	0.00290447	0.00428	0.00238522	0.00352519	0.00640352	0.0057705	0.00593234	0.0061022	0.00695839	0.0269311	0.00272709
0.834894	0.00325649	0.00367757	0.0052452	0.00288767	0.0110089	0.00437972	0.00617012	0.0240599	0.0126305	0.0816333	0.0101566
0.848317	0.00296941	0.0038204	0.00382455	0.00365303	0.0336314	0.00526123	0.00538029	0.02458	0.0251609	0.0387163	0.00468581
0.798747	0.00172674	0.00291234	0.00163042	0.00386624	0.00689801	0.00144432	0.00250758	0.0155679	0.00445232	0.150383	0.00986453
0.929296	0.00317357	0.00310181	0.00369281	0.00408738	0.0134687	0.00490777	0.00602847	0.00497812	0.00746875	0.0155746	0.00422219
0.643784	0.00355621	0.00381823	0.00239124	0.00363273	0.00435588	0.00295736	0.00307087	0.00830368	0.00542793	0.313799	0.00490285
0.201962	0.00353665	0.00292963	0.0124092	0.00366075	0.00814266	0.00149775	0.00225446	0.088359	0.0109947	0.586863	0.0773898
0.734973	0.00265472	0.00433814	0.00304892	0.00384421	0.00574374	0.00461967	0.00415395	0.00616849	0.00429875	0.221798	0.0043579
0.754023	0.00184331	0.00260786	0.00591019	0.00378953	0.136686	0.00438285	0.0089997	0.0134183	0.0227395	0.0354532	0.0101467
0.859914	0.00268149	0.00394089	0.00315944	0.00435247	0.0117695	0.00611957	0.00518608	0.00699776	0.00659016	0.0857115	0.00357716
0.717927	0.00493425	0.00560336	0.00424523	0.000597003	0.00812526	0.0028229	0.0194751	0.130881	0.0331667	0.0352233	0.0369988
0.717767	0.00285353	0.00331074	0.00249838	0.00248287	0.00908176	0.00283333	0.00357363	0.00849592	0.00997259	0.222158	0.0149725
0.42233	0.00284183	0.0121311	0.00114075	0.00446759	0.00883934	0.00846647	0.00330835	0.00585934	0.0898073	0.440567	0.000240611
0.377931	0.00383339	0.00661927	0.00774301	0.00192543	0.0188544	0.00375613	0.017041	0.191051	0.0157092	0.106628	0.248907
0.10178	0.0263096	0.0154154	0.0567404	0.015138	0.0547092	0.0923945	0.172893	0.216326	0.172657	0.0485783	0.0270597
0.041612	0.005399	0.00676875	0.00319079	0.00513307	0.00540112	0.00398989	0.0025467	0.00430291	0.00396517	0.910833	0.00685779
0.557795	0.00353693	0.00465657	0.00464726	0.00373485	0.00491306	0.00408134	0.00510897	0.071952	0.0203503	0.282868	0.0363556
0.772606	0.00262868	0.00444725	0.00319289	0.00408217	0.00453328	0.00451517	0.00332574	0.00711152	0.00377345	0.185993	0.00379076
0.473904	0.0024486	0.0168405	0.0120609	0.00704199	0.131515	0.00787466	0.0118753	0.00309092	0.0123086	0.315317	0.00572284
0.704972	0.00151674	0.00669689	0.00197958	0.00368529	0.0441688	0.00901981	0.0120779	0.0795015	0.0627401	0.0701867	0.00345432
0.838093	0.00240633	0.00303134	0.00605631	0.00657664	0.0143762	0.00652705	0.00887669	0.00548517	0.00695089	0.100407	0.00121362
0.380557	0.00471049	0.008889	0.00796037	0.00489369	0.201143	0.00410692	0.0134744	0.266162	0.00441024	0.0806046	0.0230876
0.350705	0.00074534	0.00269175	0.00235426	0.0172628	0.332329	0.00864233	0.0210573	0.00232369	0.0268399	0.203983	0.0310652
0.919754	0.00275572	0.00355677	0.00356453	0.00424892	0.00991943	0.00526686	0.0059705	0.00844963	0.00523659	0.0268096	0.00446695
0.742061	0.00258096	0.00265763	0.00617109	0.00409162	0.0428245	0.00403239	0.00744085	0.0133136	0.0322777	0.108609	0.0339394
0.805693	0.00289378	0.00390676	0.00315058	0.0037208	0.00383533	0.00441991	0.00326786	0.00662258	0.00370172	0.155772	0.00301575
0.888324	0.00298321	0.00361241	0.00324553	0.00378804	0.00484415	0.00454571	0.00456518	0.00645992	0.00388733	0.0700143	0.00373002
0.651003	0.0108665	0.00409531	0.0112715	0.0243502	0.0134128	0.0101799	0.0245785	0.065753	0.0732281	0.0832429	0.028018
0.690502	0.00194366	0.00661402	0.00248904	0.00288473	0.0163456	0.0013838	0.00253389	0.0291234	0.200086	0.034552	0.0115418
0.202417	0.00159899	0.00558455	0.00247435	0.00412331	0.00285898	0.00117404	0.00206103	0.0178857	0.00343966	0.644839	0.111543
0.673071	0.00258859	0.00193645	0.0101912	0.00798474	0.0313414	0.00861145	0.00758733	0.0235632	0.0358115	0.190521	0.00679159
0.853681	0.00300211	0.00281251	0.00379105	0.00407296	0.00945736	0.0042886	0.004432	0.00985908	0.00640332	0.0922332	0.00596681
0.92689	0.00308832	0.00289667	0.00379777	0.00368908	0.0113857	0.00343302	0.0117552	0.00876913	0.00569334	0.0129204	0.00568119
0.667463	0.00236816	0.00984564	0.00116459	0.00147965	0.00128643	0.000496068	0.00325197	0.144584	0.0260155	0.132869	0.00917596
0.386766	0.013141	0.00393908	0.0106371	0.00286035	0.0171579	0.0191589	0.0571979	0.123066	0.16019	0.166941	0.0389443
0.354257	0.000904242	0.00444325	0.00171041	0.00737602	0.0171954	0.00294252	0.00138139	0.00519336	0.00757339	0.593941	0.00308183
0.684255	0.00178799	0.00529286	0.00303608	0.00355688	0.0136975	0.00374635	0.00417851	0.00907755	0.00715704	0.260536	0.00367838
0.685408	0.00308642	0.0635483	0.00311263	0.00355977	0.00912344	0.00508629	0.0168808	0.0612284	0.0575939	0.087816	0.00355574
0.917222	0.00330466	0.00335167	0.00316282	0.00427133	0.00535852	0.004594	0.00475945	0.00584337	0.00549603	0.0379754	0.00466103
0.917929	0.00252293	0.00473087	0.002866	0.00509692	0.00989797	0.00681819	0.0214576	0.0102159	0.0105775	0.00582571	0.00206099
0.476525	0.00405352	0.00751352	0.00326241	0.0133924	0.0983757	0.0551776	0.0227139	0.123903	0.0463469	0.103542	0.0451935
0.922969	0.00326961	0.00246936	0.00247037	0.00429227	0.0113075	0.00446319	0.0042862	0.005696	0.00729275	0.0281642	0.00331986
0.70243	0.00660925	0.0059902	0.00608512	0.00960202	0.00761582	0.00547152	0.0059608	0.0101148	0.0126074	0.224013	0.00349957
0.750635	0.00201394	0.00421051	0.00299046	0.00512007	0.0519651	0.00336747	0.00279016	0.00301633	0.0293199	0.109642	0.0349294
0.736339	0.00251241	0.00285594	0.0042684	0.0243812	0.0297178	0.00980911	0.00620812	0.00525257	0.00840709	0.166719	0.00353009
0.922624	0.00294816	0.00336355	0.00490595	0.00460167	0.0153946	0.00628072	0.00760034	0.0105112	0.00824048	0.00996544	0.00356362
0.742091	0.00175518	0.00485376	0.00640232	0.00290047	0.00483404	0.00271112	0.00451214	0.0108326	0.00234183	0.207194	0.00957128
0.912467	0.00320535	0.00276975	0.00508678	0.00380299	0.0158852	0.00650167	0.0210282	0.00930436	0.0100556	0.00625156	0.00364127
0.942446	0.00319976	0.00361767	0.00301856	0.00407509	0.0065995	0.00586082	0.00614172	0.00656858	0.00705208	0.00789888	0.00352181
0.632061	0.00211751	0.00564591	0.0033111	0.0114533	0.00701138	0.00254148	0.00649166	0.0155829	0.0375892	0.235363	0.0408309
0.898196	0.00303832	0.00261166	0.00356602	0.00359732	0.00774178	0.00375049	0.00419147	0.00908644	0.00649841	0.0504665	0.00725529
0.94083	0.00315427	0.00330232	0.00319556	0.00459497	0.00700045	0.00500507	0.00538332	0.00545047	0.00486333	0.0129114	0.00430895
0.66356	0.00219838	0.0037667	0.00175598	0.00813038	0.21808	0.00492855	0.0349816	0.0201246	0.0282214	0.0100284	0.00422363
0.784429	0.00303619	0.00291476	0.004458	0.00370554	0.00465695	0.002528	0.00315849	0.0189097	0.0134626	0.13486	0.02388
0.174775	0.00169858	0.0906152	0.0165433	0.00420599	0.194297	0.0174919	0.00604061	0.00498873	0.00443894	0.482691	0.00221397
0.703914	0.00160054	0.00979211	0.00432558	0.00479601	0.0434178	0.00831026	0.0103331	0.0346467	0.0112684	0.161806	0.00579021
0.356609	0.0047498	0.00963615	0.00225539	0.0110155	0.0718048	0.00170292	0.00274525	0.000431034	0.154707	0.372997	0.0113471
0.351901	0.0218861	0.00985618	0.0086374	0.00337261	0.0053209	0.0147918	0.0547414	0.158454	0.170309	0.175455	0.0252742
0.690437	0.00198233	0.00432969	0.0105848	0.0341661	0.0183063	0.0393293	0.0197249	0.0340913	0.0119937	0.131631	0.00342391
0.709861	0.0024978	0.00208804	0.00967889	0.0665427	0.0547502	0.02087	0.0513659	0.0201588	0.0278282	0.0308974	0.00346123
0.632431	0.00243776	0.00225658	0.0439512	0.0743251	0.0645029	0.0314734	0.0743967	0.0307442	0.0223966	0.0177069	0.0033773
0.779826	0.00237899	0.0030908	0.00284682	0.00782246	0.0454881	0.00686346	0.00681932	0.0108662	0.00652973	0.113199	0.014269
0.423431	0.00256418	0.00613193	0.00180887	0.0058516	0.00605972	0.00591616	0.00464089	0.00518954	0.0199882	0.515494	0.00292396
0.804366	0.00404829	0.00351999	0.00346769	0.00256014	0.00450645	0.00294251	0.00542915	0.0410613	0.0138322	0.10049	0.0137766
0.772963	0.00363395	0.00324862	0.00543659	0.00329864	0.0069885	0.00347304	0.00407489	0.0392612	0.00566399	0.144788	0.00716904
0.636436	0.00258287	0.00332071	0.00356227	0.0382053	0.0101151	0.0110493	0.00784517	0.00447099	0.00863688	0.268632	0.0051428
0.904927	0.00278834	0.00609011	0.00756049	0.00398334	0.0201486	0.00608234	0.024427	0.00983195	0.00909441	0.00223716	0.00282921
0.760351	0.00211251	0.00891874	0.00585545	0.00353647	0.0368293	0.00540007	0.00791326	0.00957844	0.00683868	0.151255	0.00141119
0.811082	0.00260981	0.00317327	0.0041684	0.00746166	0.00944849	0.00608209	0.00443033	0.00766488	0.00803388	0.132166	0.00367829
0.598153	0.00274381	0.00460877	0.0032926	0.00255997	0.0113386	0.00426717	0.00467489	0.0272812	0.0307579	0.28451	0.0258121
0.841935	0.00283657	0.0029627	0.0046857	0.00485518	0.00634295	0.00417183	0.00437397	0.00767736	0.00409279	0.11127	0.00479652
0.829936	0.002102	0.00512276	0.00322239	0.0044953	0.0591517	0.00689221	0.0288532	0.00185398	0.0207806	0.0360661	0.00152348
0.938814	0.00309693	0.00328795	0.00389612	0.00378818	0.00763337	0.0050341	0.00681672	0.00659484	0.00601299	0.0105886	0.00443617
0.797387	0.00196141	0.00853993	0.00254933	0.00632265	0.0133036	0.0084335	0.0049713	0.0371117	0.00585233	0.10941	0.00415763
0.931493	0.00291758	0.00340447	0.00375272	0.00456865	0.0111055	0.00449691	0.00529892	0.0069986	0.00608951	0.0148437	0.00503063
0.92599	0.00319581	0.00326411	0.00287595	0.00462387	0.00666203	0.00503618	0.00450611	0.00565702	0.00647017	0.0279993	0.00371895
0.865325	0.00291372	0.00291397	0.00794342	0.00437156	0.0213386	0.00607476	0.00639679	0.0113199	0.0155858	0.0506626	0.00515393
0.931756	0.00334021	0.00351387	0.00381778	0.00420383	0.00617424	0.00637271	0.00727038	0.00733408	0.0067327	0.0152679	0.0042164
0.936932	0.00314233	0.00322521	0.00297651	0.00370981	0.00977115	0.00495066	0.00537849	0.00568631	0.00608801	0.0136131	0.00452639
0.826665	0.00269922	0.00299001	0.00162856	0.0084763	0.00913976	0.0031383	0.00273875	0.00675517	0.0508945	0.0818782	0.00299659
0.821685	0.00223548	0.00285087	0.00604725	0.00369699	0.0833294	0.00476193	0.00507824	0.0243327	0.0211899	0.0180658	0.00672633
0.886523	0.00308364	0.00275092	0.003278	0.00389444	0.0050045	0.00385374	0.00386101	0.00857259	0.00538213	0.0683439	0.00545186
0.762718	0.00207657	0.00299339	0.00453735	0.0147515	0.0371159	0.00616435	0.00687803	0.00846368	0.0663716	0.0808869	0.0070427
0.898398	0.00336891	0.00345714	0.00312319	0.00419132	0.00665499	0.00298869	0.00462825	0.0120267	0.00337616	0.0500711	0.00771596
0.870219	0.00314144	0.00323142	0.00336978	0.00438635	0.00479362	0.00387466	0.00398119	0.00812141	0.00612488	0.0843351	0.00442128
0.918548	0.00208397	0.0031622	0.00416951	0.00504405	0.0181725	0.00430418	0.00626242	0.013561	0.00342282	0.0166021	0.0046677
0.936822	0.00263018	0.00402586	0.00212096	0.00503207	0.00741283	0.00666231	0.00803005	0.00584686	0.00633338	0.0128818	0.00220143
0.902868	0.00311004	0.00327167	0.00278395	0.00424927	0.00626539	0.00390447	0.00338164	0.00643774	0.00516207	0.0550479	0.00351798
0.416855	0.00296745	0.00457657	0.00361135	0.00340192	0.00544057	0.00322644	0.00266573	0.00440289	0.00421379	0.547029	0.00160866
0.00653972	0.00322242	0.00724076	0.00341905	0.00559443	0.00408645	0.00382278	0.00330288	0.00574334	0.00392567	0.943666	0.00943658
0.641612	0.00296758	0.0031476	0.0136832	0.0801635	0.0416041	0.0677777	0.0272984	0.0260433	0.0294619	0.063197	0.0030439
0.908495	0.00233883	0.00277676	0.00303281	0.00397557	0.0196231	0.00315421	0.00308673	0.0055197	0.0038474	0.0365328	0.00761718
0.784489	0.00246935	0.00249632	0.0046586	0.00461144	0.00902704	0.00297026	0.00312738	0.00520997	0.001901	0.176192	0.00284717
0.613727	0.00413636	0.00377576	0.00308527	0.00361787	0.00836024	0.00601081	0.00348463	0.00726698	0.0037493	0.340207	0.00257813
0.931074	0.00300431	0.00315974	0.00362738	0.00430588	0.0135011	0.00561777	0.00693577	0.00764939	0.00971543	0.00674551	0.00466377
0.943198	0.00333742	0.00326456	0.00316755	0.00446616	0.00720035	0.00553984	0.00548292	0.0057114	0.00665648	0.00848782	0.0034879
0.63819	0.0019901	0.00361388	0.003392	0.00199765	0.00407944	0.00173373	0.00159728	0.00679414	0.0131394	0.283436	0.0400358
0.942159	0.00329923	0.00301357	0.00362201	0.00443671	0.00702144	0.00579845	0.00658874	0.00657754	0.00609561	0.007599	0.00378917
0.896256	0.00319515	0.00308492	0.002857	0.00334045	0.00537299	0.00455652	0.00448819	0.00653845	0.00512919	0.0614929	0.00368859
0.0523671	0.0017049	0.0113268	0.00155666	0.000430621	0.00197772	0.00546553	0.00458273	0.389843	0.199596	0.293819	0.0373292
0.937197	0.00342067	0.00371786	0.00316041	0.00436135	0.00829966	0.0057031	0.00684773	0.00645545	0.00589784	0.011327	0.00361186
0.928052	0.00243928	0.0032841	0.00482469	0.00485746	0.014598	0.00407303	0.00651867	0.00609733	0.00336861	0.0168901	0.00499696
0.730035	0.00201352	0.00443627	0.000792403	0.00104907	0.00355341	0.00226639	0.00127771	0.0573313	0.0150473	0.163443	0.0187544
0.867792	0.00305673	0.00292915	0.00345861	0.00436151	0.00663868	0.00391294	0.0038705	0.00987573	0.00571987	0.0830866	0.00529778
0.81226	0.00391079	0.00368746	0.00371453	0.00332832	0.0241797	0.0063279	0.0296221	0.0450396	0.0350533	0.0279537	0.0049229
0.0101842	0.00294289	0.0190659	0.00331511	0.00507791	0.00462145	0.00488176	0.00394733	0.0963753	0.00380744	0.830195	0.015586
0.143569	0.00247706	0.152476	0.190237	0.0782938	0.245922	0.0135893	0.0337251	0.0506081	0.0205888	0.0598884	0.00862578
0.711614	0.00214835	0.00559208	0.0815716	0.0406827	0.0984245	0.0032271	0.00476427	0.0154884	0.00718383	0.0255457	0.00375782
0.353191	0.000552788	0.00310804	0.0062193	0.00772691	0.310542	0.0131289	0.0446685	0.0311804	0.0993335	0.0909225	0.0394265
0.654255	0.00330678	0.00220203	0.00308937	0.00540765	0.0258987	0.00907135	0.00751448	0.0226671	0.0971853	0.162005	0.00739795
0.723174	0.00347215	0.00309091	0.00810203	0.0419087	0.0165194	0.0111423	0.0446944	0.0299929	0.0183152	0.0936959	0.00589185
0.932564	0.00304354	0.00337168	0.0031095	0.00432972	0.00843864	0.00579208	0.00651034	0.00589443	0.0107149	0.0125418	0.0036898
0.359194	0.00309825	0.00272329	0.00247639	0.00234656	0.00699619	0.000640476	0.000441888	0.116329	0.0466343	0.194823	0.264297
0.940798	0.00353631	0.00328306	0.00317792	0.004033	0.00628624	0.00552533	0.00631311	0.00627399	0.0063661	0.0106377	0.00376922
0.915859	0.00286057	0.00327202	0.00417442	0.00412726	0.0158027	0.00494253	0.00604862	0.00955604	0.0051602	0.0232149	0.00498162
0.722048	0.00360961	0.00299666	0.00382288	0.00460416	0.0116469	0.00473404	0.00642581	0.0358477	0.127424	0.0676318	0.00920832
0.862416	0.00294012	0.003756	0.00211812	0.00453775	0.00786391	0.00469725	0.00385902	0.00622278	0.00938541	0.0891967	0.00300731
0.938299	0.00334587	0.00410322	0.0033489	0.00404028	0.00586754	0.00566242	0.00615354	0.0071728	0.00692044	0.0111556	0.00393041
0.596758	0.000997667	0.00110747	0.0035067	0.016212	0.152138	0.00778015	0.00534541	0.0164071	0.0999772	0.0949616	0.00480906
0.940925	0.00324329	0.00356144	0.00328209	0.00421379	0.00651019	0.0059394	0.00618834	0.00718856	0.00658775	0.00891646	0.00344415
0.559437	0.00236753	0.00503315	0.00309219	0.0107432	0.108887	0.00576232	0.0636939	0.0029373	0.228858	0.00495015	0.00423755
0.718533	0.00457343	0.00395146	0.00322457	0.00364835	0.00631604	0.00634341	0.00424065	0.00568019	0.00564334	0.236862	0.000983424
0.91914	0.00320384	0.00484683	0.00232044	0.00389666	0.0324378	0.00526877	0.00547034	0.00456996	0.00814322	0.007957	0.002745
0.508888	0.00303676	0.00600487	0.00169768	0.00129334	0.00853187	0.00247123	0.0294674	0.185763	0.155412	0.091838	0.00559673
0.744463	0.00430068	0.00588141	0.00376051	0.00396605	0.00610309	0.00483518	0.0199464	0.0700109	0.0291647	0.0956343	0.0119343
0.823401	0.00313782	0.00572944	0.002838	0.00285112	0.00428594	0.00353531	0.00514706	0.0196722	0.00663037	0.119087	0.00368415
0.748329	0.00333482	0.00263635	0.0088741	0.00346732	0.0291035	0.00490411	0.0137446	0.0340608	0.037264	0.0982513	0.0160304
0.557093	0.00486413	0.00464655	0.00365336	0.00211583	0.137943	0.0101131	0.0201601	0.0266359	0.125567	0.0804674	0.0267407
0.466135	0.00197106	0.108569	0.00170248	0.00514113	0.0907771	0.0115012	0.00845834	0.0167818	0.00893887	0.277816	0.00220809
0.493966	0.00262155	0.0047176	0.00111052	0.00273804	0.000896555	0.000767084	0.000908464	0.0218652	0.0271135	0.428224	0.0150721
0.86288	0.00275298	0.00343356	0.00325071	0.00385699	0.0314036	0.00585536	0.00593754	0.023521	0.0207018	0.0313211	0.00508498
0.414234	0.00463312	0.00374045	0.00390518	0.00315319	0.00191613	0.00262625	0.00149398	0.0130215	0.00710006	0.421336	0.12284
0.250288	0.00658576	0.0142112	0.00164417	0.00235739	0.00289103	0.0046729	0.0187041	0.067189	0.0366492	0.579703	0.0151051
0.796061	0.00375107	0.00289467	0.00330582	0.00284599	0.0044075	0.00328806	0.00450262	0.0253236	0.0191229	0.117297	0.0172005
0.64795	0.00247879	0.00411897	0.00471579	0.00542147	0.00561409	0.00449623	0.00287575	0.0149867	0.00808264	0.293669	0.00559108
0.61392	0.00161067	0.00365154	0.00459723	0.00270851	0.0727377	0.00562437	0.00809359	0.0745665	0.0325491	0.0970726	0.0828682
0.734699	0.00253029	0.00334374	0.00737404	0.00492617	0.0142477	0.00460289	0.0059174	0.0145963	0.00593728	0.185603	0.0162221
0.587546	0.00220096	0.00313374	0.0311545	0.0412731	0.0638082	0.00820045	0.0428108	0.0355111	0.010575	0.164199	0.00958719
0.940054	0.00278754	0.00375192	0.00275355	0.00350924	0.00715118	0.00676844	0.00721235	0.0080575	0.00734508	0.00764585	0.00296343
0.622522	0.0036978	0.00280296	0.00581665	0.00256169	0.0210973	0.00448409	0.00734638	0.0394927	0.0891267	0.193423	0.00762789
0.888987	0.00315655	0.00311623	0.00366367	0.00394678	0.0079058	0.00366564	0.00470073	0.0129452	0.00667386	0.0552452	0.00599328
0.57872	0.0200132	0.0117443	0.00473569	0.00466069	0.0177084	0.0098688	0.110365	0.0197034	0.0247471	0.0345518	0.163182
0.937114	0.00307443	0.00362457	0.00405136	0.00383004	0.00634685	0.00583768	0.00600761	0.00609263	0.00643276	0.0139828	0.00360507
0.420237	0.00223629	0.00547414	0.00156527	0.00503005	0.0120726	0.00367072	0.00334644	0.00439784	0.00681545	0.526342	0.00881177
0.778128	0.003495	0.00319085	0.00270326	0.0073796	0.0288385	0.00364034	0.0269086	0.0373327	0.0402266	0.0591317	0.00902495
0.936887	0.00307142	0.00287111	0.00448895	0.00425605	0.0108691	0.00570508	0.0074989	0.00727355	0.00535318	0.0074753	0.00424999
0.56322	0.00580646	0.00372055	0.00388032	0.00233001	0.00465731	0.00186558	0.00220011	0.0473383	0.0136303	0.181083	0.170268
0.824677	0.00253222	0.00643295	0.00279371	0.00412251	0.00614342	0.00550962	0.0073319	0.00606832	0.00959284	0.119962	0.00483404
0.671664	0.00156495	0.0057891	0.00129244	0.00856404	0.00938728	0.00502918	0.00275189	0.00322038	0.0560769	0.232619	0.00204089
0.829778	0.00257549	0.00319291	0.00352152	0.0520059	0.0371866	0.00906157	0.00979745	0.0294907	0.00970034	0.0100498	0.00363956
0.850548	0.00298353	0.00407528	0.00377593	0.0032458	0.0113836	0.00621166	0.00493904	0.0203965	0.00544773	0.0844616	0.00253089
0.928379	0.00313513	0.00308443	0.0032546	0.00375843	0.00538235	0.00502779	0.0052206	0.00615034	0.00502004	0.0273523	0.00423503
0.110896	0.00397283	0.00492609	0.00411645	0.00450859	0.00260642	0.00375155	0.00222642	0.0157905	0.0045335	0.778384	0.0642876
0.481462	0.00411018	0.00294962	0.0186142	0.00327706	0.0410425	0.00662283	0.00594837	0.0561731	0.0828208	0.244604	0.052375
0.937872	0.00333117	0.00313856	0.00387016	0.00401089	0.00726652	0.00541566	0.00794518	0.00843059	0.00625152	0.00824657	0.00422151
0.699819	0.00159733	0.00449508	0.0050126	0.00601669	0.012116	0.00590979	0.0134295	0.0130011	0.0160406	0.217275	0.00528693
0.926189	0.0032181	0.00329344	0.00629623	0.00455506	0.00947895	0.00569009	0.00725971	0.00805379	0.00631594	0.0154558	0.00419387
0.852339	0.00154982	0.00531873	0.0028875	0.00613569	0.00671517	0.00579428	0.0151848	0.0295292	0.0137093	0.0585162	0.00231981
0.860183	0.00262809	0.00496714	0.00362378	0.00440824	0.0131643	0.00374077	0.00520967	0.00946441	0.00988578	0.0730877	0.0096375
0.730388	0.00273	0.0044788	0.00302311	0.00859763	0.00700138	0.00490129	0.00380559	0.00877564	0.00889868	0.21041	0.00699004
0.903716	0.00281695	0.00337893	0.00295115	0.00418017	0.0112218	0.00456329	0.00450262	0.00597644	0.00685007	0.0451308	0.00471182
0.905019	0.00286565	0.00320868	0.00315446	0.00354677	0.0126803	0.00358823	0.00457817	0.00816987	0.00672246	0.0403709	0.00609509
0.261388	0.0521605	0.0145425	0.0561612	0.0133085	0.0641484	0.0977939	0.16163	0.0540354	0.174152	0.0411975	0.00948155
0.913959	0.0030483	0.0027352	0.00324536	0.00325981	0.00715025	0.00426231	0.00483093	0.0102371	0.00789842	0.0336399	0.00573334
0.893678	0.00313389	0.00363042	0.00307684	0.00384303	0.005303	0.00486701	0.00470362	0.00714582	0.00598731	0.0620692	0.00256197
0.175397	0.0116536	0.0113665	0.00539822	0.00909873	0.041319	0.0170166	0.0218947	0.0772421	0.116377	0.470182	0.0430537
0.940313	0.00331073	0.00392562	0.0035129	0.00402512	0.00602365	0.00575661	0.0061417	0.00661981	0.00730952	0.00930341	0.00375834
0.931425	0.00304034	0.00314469	0.00454715	0.00457994	0.0122245	0.00396626	0.00537239	0.00804117	0.00562587	0.0128274	0.00520567
0.767405	0.0024929	0.00342636	0.00257507	0.00438902	0.124182	0.00293065	0.00493699	0.0221121	0.00738826	0.0536885	0.00447312
0.869645	0.00264274	0.0033769	0.0033352	0.00367327	0.00470787	0.00371198	0.0034793	0.00735399	0.00347524	0.0887007	0.0058975
0.787777	0.00268429	0.00356757	0.00321207	0.00414913	0.00363613	0.00452402	0.00308412	0.00696592	0.00344301	0.174352	0.00260537
0.637779	0.003014	0.00245138	0.0408023	0.0657234	0.0441037	0.045427	0.0466693	0.016524	0.0335786	0.0602824	0.00364452
0.909879	0.00339302	0.00346923	0.00552206	0.00382229	0.00855108	0.00617832	0.0104858	0.0169381	0.00922001	0.0182048	0.00433611
0.831449	0.00241717	0.00809487	0.00346198	0.00492954	0.00916762	0.00729412	0.00481116	0.0303972	0.00369357	0.0897771	0.00450666
0.84466	0.00230764	0.00532877	0.00223785	0.00427575	0.00605508	0.00608866	0.00596857	0.00605604	0.00743314	0.100941	0.00864775
0.93834	0.00292576	0.0032942	0.00418988	0.00435303	0.0112843	0.00526001	0.00604074	0.0056623	0.00495866	0.00914652	0.00454507
0.693729	0.00264204	0.00404173	0.00288586	0.00432981	0.00412081	0.00459455	0.00230999	0.00742717	0.00385148	0.267556	0.00251227
0.906703	0.00291162	0.00417218	0.00270212	0.00362265	0.00764238	0.00516006	0.0051582	0.00571821	0.00506417	0.0481846	0.00296091
0.636951	0.00363008	0.00829944	0.00302751	0.00317007	0.0250032	0.00204412	0.00336463	0.0309114	0.0144861	0.172449	0.0966637
0.839014	0.00288913	0.00369547	0.00303203	0.00351379	0.00498721	0.0043215	0.00457089	0.0072925	0.0044733	0.117858	0.00435171
0.929084	0.00298005	0.00301807	0.00405581	0.00392828	0.0145337	0.0064472	0.00878605	0.00945578	0.00666556	0.00805051	0.00299515
0.937578	0.00297891	0.00265978	0.00387175	0.00433221	0.00798711	0.00488582	0.00567272	0.00915106	0.00511919	0.0112627	0.00450072
0.67817	0.00163603	0.00886116	0.00361466	0.00612936	0.0156799	0.00462049	0.00885643	0.00550538	0.00352879	0.25668	0.00671837
0.776961	0.00368494	0.00346087	0.0179393	0.00362561	0.0125758	0.00680951	0.00828198	0.0440298	0.0160437	0.0764732	0.0301145
0.611715	0.00243341	0.00533951	0.00318535	0.00493945	0.00440092	0.00488682	0.00327572	0.00744014	0.00395941	0.346238	0.00218553
0.936883	0.0033388	0.00339831	0.00342826	0.00424445	0.00619263	0.00517983	0.00536346	0.00621312	0.00520153	0.0163725	0.00418366
0.934509	0.00288567	0.00377448	0.00253985	0.00404055	0.0104351	0.00687367	0.00708859	0.0106002	0.00730284	0.00729222	0.00265798
0.937484	0.00336516	0.00337704	0.00302596	0.00408148	0.00537	0.00543665	0.00560838	0.00644484	0.00559889	0.0161077	0.00409959
0.511097	0.00255301	0.00610309	0.00327714	0.00481984	0.0038302	0.00496965	0.00290758	0.00898566	0.00348061	0.44518	0.00279554
0.776366	0.00278202	0.00326738	0.00347145	0.00515514	0.00579573	0.00429596	0.00387737	0.00862456	0.00465474	0.17571	0.00599962
0.934911	0.00303218	0.0030744	0.00309329	0.00469389	0.00663331	0.00415777	0.0043789	0.00581899	0.00440755	0.0206725	0.00512598
0.888136	0.00279887	0.00256842	0.00216361	0.00430489	0.0108465	0.0041057	0.00476519	0.00720115	0.0379811	0.0313171	0.00381143
0.782696	0.00307117	0.00356879	0.00360522	0.00332579	0.00466189	0.00371557	0.00382969	0.00906817	0.00700827	0.167239	0.0082099
0.923904	0.00292346	0.00348882	0.00476026	0.00366556	0.00801561	0.00421101	0.0099197	0.00667765	0.00573986	0.0231217	0.00357187
0.869975	0.00361651	0.00317637	0.0031811	0.00405949	0.00571424	0.00430174	0.00554651	0.0146268	0.00545068	0.0751416	0.00521
0.69513	0.00311939	0.00379097	0.00325865	0.00317027	0.00360113	0.00312176	0.00288902	0.0110485	0.00788374	0.240752	0.0222345
0.846071	0.00251372	0.00266258	0.00292736	0.00442737	0.0284664	0.00421388	0.00308666	0.00939851	0.0167289	0.0755894	0.00391439
0.773293	0.00341388	0.00696802	0.00341215	0.00299073	0.00461134	0.00447427	0.0194022	0.120939	0.0330529	0.0231682	0.00427365
0.939403	0.00331982	0.0034377	0.00376984	0.00438448	0.00607195	0.00523831	0.00588006	0.00693099	0.00501907	0.0120804	0.00446407
0.778596	0.00334958	0.00939068	0.0025557	0.002384	0.0318131	0.00423857	0.0169891	0.0176056	0.112247	0.0163435	0.00448694
0.933162	0.0032591	0.00312714	0.00370392	0.00451884	0.00605851	0.00485935	0.0052515	0.00922017	0.00484849	0.0176689	0.00432249
0.918895	0.00294859	0.00308785	0.00418676	0.00463137	0.0117029	0.00490387	0.00634108	0.00895051	0.00573948	0.023007	0.00560555
0.437822	0.000778354	0.173075	0.00321612	0.00253746	0.147691	0.00192486	0.0119308	0.0106628	0.040854	0.0949957	0.074511
0.930058	0.00309474	0.00365128	0.00522215	0.00342455	0.00700628	0.00528343	0.00653855	0.00603267	0.00577676	0.0200538	0.00385727
0.899322	0.00267344	0.0040502	0.00369252	0.00431705	0.00591185	0.00397323	0.00417627	0.00624568	0.00366695	0.057443	0.00452798
0.864112	0.00346887	0.00438034	0.00324892	0.00470463	0.0307262	0.00608216	0.0128407	0.0227668	0.0256653	0.0184011	0.00360292
0.939823	0.00315665	0.00291417	0.00378871	0.00454525	0.00853457	0.00576235	0.0069951	0.00653541	0.00629509	0.00738384	0.00426629
0.792045	0.00367514	0.00477209	0.00496396	0.00249081	0.00648508	0.00412252	0.00640621	0.0433204	0.0157851	0.086029	0.0299044
0.59277	0.00192569	0.00289345	0.00131302	0.0483932	0.0564427	0.00496808	0.00369273	0.00454218	0.0519028	0.158349	0.0728076
0.799312	0.00266382	0.00420617	0.00350503	0.00453523	0.00529364	0.00496409	0.00380585	0.00800607	0.00443139	0.155677	0.0035995
0.934332	0.00279024	0.0036186	0.00221537	0.00380282	0.00595646	0.00587828	0.00576564	0.00646214	0.00698367	0.0199166	0.00227855
0.852508	0.00236655	0.002626	0.00256972	0.00472409	0.0561994	0.00382182	0.00372573	0.00347782	0.0432782	0.0198964	0.00480582
0.0916554	0.00372772	0.00534973	0.00482045	0.00473887	0.00819055	0.00488473	0.00320918	0.00546952	0.00506662	0.848461	0.0144261
0.936848	0.00322315	0.00372087	0.00332774	0.00371148	0.00561897	0.00515994	0.00558358	0.00638631	0.00561596	0.0169374	0.00386669
0.916711	0.00296582	0.0031018	0.00423055	0.00445502	0.0127796	0.00441022	0.00558938	0.00603738	0.00459764	0.0299145	0.00520749
0.929428	0.00307068	0.00299137	0.00254991	0.00427162	0.00838853	0.00490025	0.00469123	0.0046032	0.0142968	0.0173502	0.00345821
0.905983	0.00296434	0.00321221	0.00323016	0.00519759	0.00670289	0.00551451	0.00471825	0.0115299	0.00466995	0.0421229	0.00415478
0.872143	0.00258674	0.0028338	0.00361698	0.0110309	0.0352653	0.00620773	0.00604625	0.0134449	0.00610548	0.0360922	0.00462663
0.706508	0.00255899	0.00382488	0.00309055	0.00469224	0.00707868	0.00581098	0.00337377	0.00768742	0.00469989	0.24733	0.00334533
0.901683	0.00289611	0.00308863	0.00392547	0.00470196	0.0111864	0.00550565	0.00667513	0.0160588	0.00654563	0.0324028	0.00533069
0.887234	0.00284851	0.00286386	0.00307366	0.00394084	0.00660335	0.00369537	0.00390259	0.0100481	0.00758177	0.0611705	0.0070373
0.876935	0.00260438	0.00370395	0.00667243	0.00892326	0.00768782	0.00915633	0.00885101	0.00972814	0.00770895	0.0548876	0.00314133
0.89752	0.00296296	0.0029424	0.00342189	0.00442655	0.00775288	0.00463783	0.00454259	0.00642059	0.00581812	0.054976	0.00457828
0.898722	0.00325754	0.00382588	0.00336949	0.00398005	0.00520309	0.00445618	0.00481218	0.00625548	0.00415363	0.0579136	0.00405034
0.7534	0.00307841	0.00987348	0.00375262	0.00418343	0.00505413	0.00470163	0.00625369	0.07472	0.0180172	0.0866165	0.0303491
0.828364	0.0036662	0.00277175	0.00484112	0.00325025	0.0221029	0.00447427	0.00698223	0.0305666	0.0312421	0.0499285	0.0118104
0.914258	0.00322537	0.00355783	0.00330523	0.00365655	0.00510689	0.00502724	0.00600087	0.00634822	0.00640875	0.0378555	0.00524941
0.930479	0.00310238	0.00371882	0.00431803	0.00403782	0.0111711	0.00562313	0.00875865	0.0118745	0.00544064	0.00727546	0.00420042
0.672427	0.00444231	0.00173172	0.0131362	0.00239792	0.0799469	0.0107097	0.0198846	0.0719895	0.0190288	0.0831244	0.0211813
0.569203	0.00427621	0.00692602	0.00421537	0.00305302	0.00396901	0.00611363	0.00784938	0.0463704	0.0189109	0.324421	0.00469218
0.821996	0.00293393	0.00309943	0.00464667	0.00353437	0.00683686	0.00369822	0.00461221	0.00968072	0.00789972	0.122034	0.00902806
0.85045	0.00300239	0.00244999	0.00415107	0.00366944	0.012764	0.00374168	0.00435281	0.0158666	0.0111183	0.0819366	0.00649737
0.835643	0.00327749	0.00306396	0.0026436	0.00613135	0.031244	0.00591646	0.0098909	0.0125372	0.073535	0.0117146	0.00440289
0.753046	0.00817662	0.00832854	0.00429222	0.00326445	0.0456753	0.0198155	0.0435462	0.0578359	0.0252822	0.0244754	0.0062618
0.755816	0.00355675	0.00435283	0.00227042	0.00218435	0.00400914	0.0016981	0.00457085	0.149083	0.00830296	0.0401001	0.0240557
0.887722	0.00400118	0.00301796	0.00291878	0.00343646	0.00568585	0.00301489	0.00652349	0.0487758	0.00994881	0.0177358	0.00721871
0.90518	0.00384404	0.00323296	0.00380361	0.00424458	0.00709706	0.004837	0.00518108	0.021569	0.0078342	0.0275531	0.00562347
0.818372	0.0027314	0.0027299	0.0025035	0.00341184	0.00592334	0.00255459	0.00258327	0.00980315	0.0160244	0.125268	0.00809549
0.525871	0.00409136	0.00153227	0.0297331	0.00959856	0.120067	0.0227413	0.0436883	0.0459506	0.0908843	0.0883632	0.0174789
0.741585	0.00247541	0.00251632	0.00379414	0.00425439	0.0124611	0.00433542	0.00354148	0.0119975	0.0452696	0.159075	0.00869477
0.826073	0.00301597	0.00307772	0.00815297	0.0105119	0.014436	0.00902998	0.0123245	0.01975	0.0139676	0.0757803	0.00388053
0.940117	0.00314258	0.00287222	0.00393238	0.00429431	0.00737773	0.00546736	0.0061637	0.0088057	0.00561146	0.00837289	0.00384249
0.926066	0.00322084	0.00448916	0.00319979	0.00415352	0.00900977	0.00516875	0.0199296	0.00852193	0.00815169	0.00615545	0.00193371
0.902594	0.00310596	0.00261261	0.00279988	0.00355128	0.00617522	0.00341478	0.0036606	0.00655161	0.00639233	0.0542126	0.00492937
0.418587	0.00321855	0.00654617	0.00318529	0.00470143	0.00528524	0.00612792	0.00326106	0.0112477	0.00348986	0.532994	0.00135558
0.316603	0.00348299	0.00582544	0.00539358	0.00393038	0.00539738	0.00638189	0.00583349	0.0185489	0.014609	0.600341	0.0136529
0.501105	0.00348709	0.00256089	0.0033288	0.00692556	0.0335643	0.00635378	0.00443166	0.0263362	0.0739373	0.321477	0.0164925
0.012358	0.00454514	0.00497781	0.00627501	0.00470254	0.00430993	0.00438867	0.00336409	0.0211456	0.00626176	0.902957	0.0247145
0.929538	0.00326776	0.00361459	0.00311673	0.0036371	0.00643885	0.00552499	0.00583413	0.006776	0.00703635	0.0213313	0.00388408
0.314167	0.0153456	0.213547	0.0117883	0.0588934	0.0998805	0.0236996	0.0498336	0.0340118	0.0216315	0.14482	0.012381
0.928922	0.0031393	0.00310042	0.00316535	0.00412699	0.00595971	0.00496523	0.00489703	0.00991199	0.00489918	0.0229457	0.00396681
0.869895	0.00276437	0.00329534	0.00498625	0.0044359	0.0128062	0.0045396	0.00473206	0.0159425	0.00543866	0.065772	0.00539201
0.458474	0.00193771	0.00378982	0.0354135	0.112239	0.0342476	0.0862831	0.0220832	0.0224631	0.0279481	0.193905	0.0012167
0.615599	0.00195205	0.0300546	0.00525079	0.0452472	0.0262644	0.063876	0.028891	0.0703764	0.0128755	0.0986586	0.000954508
0.937399	0.00320629	0.00342912	0.00379606	0.00442799	0.0059815	0.00509463	0.00558086	0.00616805	0.00483739	0.0157831	0.00429572
0.935302	0.00285035	0.00310285	0.00428191	0.00443727	0.0108948	0.00495011	0.00540395	0.00580331	0.00515169	0.0126512	0.00517065
0.940236	0.00348109	0.00313867	0.00400293	0.00433472	0.00643355	0.00536456	0.00648835	0.00633776	0.00585435	0.00985721	0.00447046
0.881934	0.00288894	0.00315543	0.0025923	0.00428761	0.0222004	0.00653084	0.00596415	0.015413	0.0132166	0.0381541	0.00366278
0.901128	0.00313914	0.00339215	0.00278929	0.00408744	0.00760733	0.00476901	0.00504407	0.00772888	0.00735856	0.0495354	0.00342055
0.91558	0.00345645	0.00273133	0.00328376	0.00391934	0.00592315	0.00354842	0.00452839	0.00824638	0.0066799	0.0361853	0.00591738
0.797559	0.00429316	0.00595572	0.002988	0.0021267	0.00418204	0.00380184	0.00915965	0.0552064	0.0535257	0.055378	0.00582395
0.731543	0.00201078	0.00391692	0.00259004	0.0025166	0.00541431	0.00282481	0.00308396	0.0100723	0.00808445	0.213709	0.014234
0.533112	0.00376843	0.00290786	0.00992255	0.00333845	0.0338438	0.00764286	0.0097999	0.0399572	0.0222703	0.317701	0.0157358
0.774578	0.00239676	0.00252629	0.00656795	0.00365681	0.0526448	0.00374956	0.00814916	0.0515792	0.0273712	0.0565773	0.0102033
0.855924	0.00292425	0.00324843	0.00302814	0.00409937	0.00704338	0.00489068	0.00422872	0.00716846	0.0048768	0.0980638	0.00450376
0.92987	0.00324542	0.00310552	0.00321737	0.00409202	0.00555934	0.00485604	0.00540945	0.00692539	0.00524105	0.0241861	0.00429197
0.86581	0.00302743	0.00513163	0.00279692	0.00293849	0.00525992	0.00598752	0.00564352	0.00617644	0.00614009	0.0890226	0.002065
0.907003	0.00298383	0.00351441	0.00418557	0.00446086	0.014132	0.00674734	0.00909039	0.0209864	0.0116436	0.011765	0.0034878
0.790509	0.00266102	0.00498411	0.00249297	0.00347013	0.00465427	0.00407722	0.00423275	0.00625444	0.00466544	0.167419	0.00457976
0.649993	0.00239704	0.00498076	0.00903344	0.00308073	0.184173	0.00310587	0.0096556	0.0098473	0.00418619	0.077784	0.0417629
0.928389	0.0031445	0.00330595	0.00330773	0.00404567	0.00602556	0.00435812	0.00487195	0.00605777	0.00464086	0.0273999	0.00445307
0.623567	0.00285055	0.00381021	0.00302178	0.00441562	0.00596213	0.00509188	0.00348138	0.00714224	0.0074281	0.325791	0.00743812
0.459428	0.00266215	0.00553569	0.00324673	0.0049393	0.00509136	0.00627496	0.00451335	0.00830864	0.00517814	0.490649	0.00417298
0.824137	0.00288508	0.00265854	0.00341733	0.00330457	0.00524977	0.00327417	0.00314962	0.00898135	0.006132	0.129194	0.00761718
0.649988	0.00280879	0.00201347	0.00970958	0.0802832	0.0556634	0.0499225	0.042779	0.0192267	0.0507779	0.0336991	0.0031289
0.785537	0.00238747	0.00612654	0.0031206	0.00263224	0.00651337	0.00279497	0.00254973	0.0178608	0.00748922	0.158211	0.0047777
0.926061	0.00321733	0.00366411	0.00364948	0.00402966	0.010959	0.00618349	0.0104401	0.00617127	0.00787666	0.0148768	0.00287071
0.935586	0.00338562	0.00341169	0.00374301	0.00383101	0.00614757	0.00525606	0.00606965	0.00724165	0.00639461	0.0148635	0.00407007
0.921752	0.00288073	0.00301174	0.00317346	0.00418267	0.00783735	0.0042098	0.00523816	0.00642667	0.00675355	0.0292968	0.0052372
0.923254	0.00316815	0.00316022	0.0034204	0.0038744	0.00586823	0.00483526	0.00504408	0.00608441	0.00457244	0.0325984	0.0041201
0.933453	0.00301704	0.00286679	0.00286216	0.00453727	0.0114384	0.00548639	0.00622659	0.00856276	0.0111535	0.00653227	0.00386337
0.934545	0.00306436	0.00299404	0.00347033	0.0047115	0.00603202	0.00497419	0.00490281	0.00668668	0.00409646	0.0201242	0.00439849
0.823866	0.00288376	0.00312887	0.00362365	0.00413	0.00695497	0.00547267	0.0042038	0.0132862	0.00754965	0.120203	0.00469697
0.518536	0.00340169	0.00517528	0.00216293	0.00108639	0.00138584	0.00193738	0.00353454	0.231686	0.0133676	0.195762	0.0219638
0.650623	0.00291571	0.00360122	0.00606127	0.000336074	0.0712343	0.00862138	0.026993	0.0562541	0.0939998	0.060901	0.0184593
0.46022	0.00995878	0.00612541	0.0130284	0.00499528	0.0284943	0.0204229	0.0616541	0.0884845	0.102902	0.18016	0.0235538
0.602554	0.00211092	0.00436616	0.00819734	0.00478666	0.321039	0.00520591	0.0146035	0.0153821	0.00631141	0.0132699	0.00217278
0.935726	0.00338679	0.00376247	0.00411247	0.00383704	0.00635563	0.00578712	0.00607405	0.0103059	0.00669807	0.0102125	0.00374148
0.835998	0.00343041	0.00441145	0.00414588	0.00401278	0.00981612	0.00461184	0.00452994	0.00572145	0.00456888	0.115155	0.00359747
0.899736	0.00304314	0.0028059	0.00319191	0.00391268	0.00574564	0.004082	0.00423586	0.00712373	0.00628938	0.0530149	0.00681924
0.845919	0.00218348	0.00401662	0.00312285	0.00319346	0.00634717	0.00292928	0.00294393	0.0117279	0.00891282	0.101523	0.00718056
0.866563	0.0021474	0.00219645	0.00342805	0.00420072	0.0288308	0.00312148	0.00293794	0.0137182	0.0365301	0.0304751	0.00585079
0.488859	0.00982157	0.00566922	0.0171167	0.00474786	0.0340364	0.0145109	0.0810289	0.0818741	0.135812	0.102448	0.0240748
0.402074	0.0184447	0.00777732	0.0113138	0.000638883	0.0109645	0.00328211	0.0123852	0.207395	0.187775	0.0823454	0.055604
0.485593	0.00399036	0.00484155	0.00222089	0.0012005	0.00498942	0.00178638	0.00403283	0.131726	0.0163184	0.324674	0.0186268
0.660043	0.00222745	0.00335276	0.00462929	0.00300172	0.0113399	0.00484213	0.00575571	0.0394138	0.0813601	0.175088	0.00894593
0.903107	0.003263	0.00338578	0.00387542	0.0036937	0.00595936	0.00491026	0.0055958	0.01189	0.00807405	0.0405157	0.00573008
0.61187	0.00278658	0.00667395	0.00462072	0.006487	0.0321483	0.00374686	0.0267496	0.0467407	0.0202446	0.232878	0.00505342
0.911272	0.00337952	0.00310425	0.00390462	0.00368889	0.0118961	0.00420371	0.00575982	0.0184274	0.00709566	0.0204627	0.00680549
0.436159	0.00370822	0.00409877	0.0199655	0.115097	0.0266217	0.0694939	0.0229029	0.0203042	0.0273217	0.250997	0.00333025
0.905385	0.00311737	0.00284733	0.00392644	0.00361465	0.00832434	0.00462238	0.00944645	0.0127376	0.00517225	0.0365072	0.0042993
0.937379	0.00342757	0.00285376	0.00296804	0.0037876	0.00728142	0.00446246	0.00508433	0.00679623	0.00814858	0.0130839	0.00472749
0.854828	0.00299467	0.00330087	0.0029457	0.00392452	0.00518968	0.00439262	0.00404182	0.00679525	0.00535478	0.100654	0.00557819
0.586413	0.0038668	0.00410539	0.00448429	0.00381901	0.00408918	0.00493984	0.00395686	0.0100989	0.00747056	0.339856	0.0269007
0.918455	0.00269237	0.00333064	0.00266941	0.00450498	0.00649262	0.00557119	0.00495747	0.00461535	0.00823436	0.0357068	0.00276998
0.940101	0.00317815	0.00308157	0.0043955	0.00453921	0.00725912	0.00550529	0.00626555	0.00693978	0.00572867	0.00875538	0.0042512
0.933356	0.00283599	0.00325487	0.00417676	0.00463123	0.0129538	0.00457797	0.00530389	0.00573451	0.00434151	0.0135624	0.00527101
0.866416	0.00265939	0.00374796	0.00321903	0.00397064	0.00520515	0.00390858	0.00367391	0.00695355	0.00376402	0.0910917	0.00539059
0.907411	0.00334544	0.00467534	0.00286204	0.00279118	0.00588701	0.00538532	0.00541501	0.0184654	0.0106059	0.029364	0.00379258
0.827502	0.00319339	0.00419736	0.00272812	0.00266906	0.00540609	0.00294048	0.00492133	0.0102179	0.00847652	0.0960944	0.0316529
0.866151	0.00287348	0.00288801	0.00521166	0.00367952	0.0489262	0.00536135	0.00664161	0.019037	0.00887558	0.0253315	0.00502354
0.778933	0.00306982	0.00465292	0.00463988	0.0038059	0.0391753	0.00369293	0.00680338	0.0113797	0.00639342	0.123959	0.0134957
0.838358	0.00281402	0.00344125	0.00345843	0.00368475	0.00422629	0.00406984	0.00339039	0.00760931	0.00376637	0.121594	0.00358761
0.9242	0.00305107	0.00350284	0.00369708	0.00439251	0.00997584	0.00557462	0.00577568	0.0182775	0.00642018	0.0110672	0.00406561
0.9342	0.00314329	0.00332242	0.0044967	0.00426029	0.00660677	0.00533867	0.00586266	0.00645083	0.00552686	0.0160693	0.00472237
0.671893	0.0048883	0.106065	0.00425392	0.00366037	0.00901252	0.00597625	0.106948	0.0225069	0.024864	0.0355325	0.0043984
0.843126	0.00201628	0.00378144	0.0034195	0.00340708	0.0197606	0.00656743	0.00617818	0.0506357	0.00691851	0.0476705	0.00651899
0.932879	0.00274564	0.00331651	0.00327772	0.00468478	0.00830386	0.00463303	0.00401899	0.00627097	0.00487174	0.0195501	0.00544755
0.908631	0.00325129	0.003208	0.00313377	0.00324855	0.00524643	0.0041724	0.00523431	0.00665938	0.00679861	0.0457504	0.00466591
0.927163	0.0026649	0.00613515	0.00385893	0.00387867	0.00966064	0.00521752	0.00709534	0.00629846	0.00469861	0.020687	0.00264128
0.880254	0.002753	0.00330231	0.00337445	0.00411827	0.00504369	0.00347817	0.00335315	0.00742072	0.00375103	0.0776593	0.00549231
0.795346	0.00375945	0.00412291	0.00498835	0.00389268	0.00566862	0.00312388	0.00409493	0.0462653	0.00586463	0.115038	0.00783559
0.611425	0.00402936	0.00297604	0.00521558	0.00250546	0.00458195	0.00217502	0.00313615	0.0285668	0.009482	0.213612	0.112295
0.880708	0.00222228	0.00297786	0.00367858	0.003478	0.0277904	0.00393453	0.00416292	0.00786798	0.012605	0.041272	0.00930224
0.721595	0.00221387	0.0055094	0.0029633	0.00574986	0.0116759	0.00364686	0.00533306	0.00634776	0.00413339	0.225672	0.00516015
0.905288	0.00285913	0.00377252	0.00382156	0.00444374	0.0103805	0.00463214	0.00510247	0.00786757	0.00448883	0.0424286	0.00491483
0.939606	0.00304731	0.00299626	0.00348433	0.00457619	0.0098239	0.00578092	0.00650428	0.00669533	0.00756795	0.00623816	0.00367916
0.495214	0.00120237	0.0046363	0.000817222	0.00487707	0.00184248	0.000488782	0.00108494	0.0685374	0.00571999	0.358306	0.0572731
0.94027	0.0032122	0.00405278	0.00436737	0.00377122	0.00705659	0.00603158	0.00600476	0.00652147	0.00571212	0.00970396	0.00329598
0.859222	0.00191444	0.00330521	0.00263278	0.00258072	0.0735665	0.00309038	0.00489808	0.0124468	0.0126407	0.0196516	0.00405138
0.929998	0.00244959	0.00356265	0.00348539	0.00369286	0.0197925	0.00559397	0.00643096	0.0043657	0.00500292	0.0119013	0.00372433
0.130774	0.0665691	0.0285952	0.00961724	0.000832678	0.00305411	0.00877133	0.0512494	0.155928	0.206407	0.221478	0.116724
0.884227	0.00214564	0.00378365	0.00233767	0.00385069	0.0368618	0.00475918	0.0301527	0.0149958	0.00984037	0.0024272	0.00461874
0.93399	0.00307797	0.00338991	0.00344092	0.0040449	0.00676756	0.00457004	0.00481782	0.00573692	0.00553228	0.020575	0.00405672
0.881149	0.00320456	0.00461545	0.00256083	0.00310759	0.0390161	0.00388733	0.00713312	0.0185655	0.00857415	0.0191807	0.00900521
0.933038	0.00296396	0.00380872	0.00317219	0.00364163	0.00959061	0.00611742	0.0063859	0.0070349	0.00749809	0.0131422	0.00360678
0.517019	0.0074596	0.00345729	0.0152166	0.00774203	0.0530182	0.0104822	0.0935519	0.117464	0.0967724	0.0676541	0.010163
0.915469	0.00328035	0.00332653	0.00308451	0.00416948	0.00640903	0.00516312	0.00515716	0.0080074	0.00654373	0.0353806	0.00400953
0.941907	0.00327023	0.00312861	0.003572	0.00415218	0.00748366	0.00561467	0.00608645	0.00670574	0.00586372	0.00822588	0.00398988
0.907451	0.00325427	0.00318308	0.00324476	0.0046795	0.00992221	0.00476856	0.00522365	0.00748792	0.0075048	0.0389799	0.00430063
0.921037	0.00290799	0.0038587	0.00289436	0.00435306	0.0111403	0.00739884	0.0199519	0.00953903	0.00842435	0.00566317	0.00283127
0.707876	0.00278827	0.00554334	0.00246781	0.00340953	0.0265791	0.00452863	0.0111798	0.00640483	0.0670048	0.159269	0.00294848
0.841544	0.00344646	0.00316646	0.00257762	0.00187928	0.00557541	0.00172063	0.00693849	0.0498905	0.00841944	0.058693	0.0161482
0.939954	0.00307046	0.00335969	0.00406831	0.00419416	0.00700888	0.00534729	0.00608438	0.00653362	0.00510497	0.0107379	0.00453619
0.942213	0.00338379	0.00416094	0.00311105	0.00424434	0.00609934	0.00584683	0.00637925	0.00597394	0.00640251	0.00865079	0.00353386
0.935127	0.00332574	0.00388355	0.00398622	0.00420461	0.00675955	0.00461588	0.00522567	0.00721582	0.00519779	0.0163568	0.00410092
0.83184	0.00208375	0.00218561	0.0023489	0.00660925	0.0654057	0.00546484	0.0070082	0.0231789	0.0128038	0.0379993	0.0030713
0.929336	0.003002	0.00322387	0.00359913	0.00429914	0.00664848	0.00456377	0.00525871	0.00704663	0.00585185	0.0218622	0.00530794
0.855916	0.00226232	0.00689323	0.00443624	0.0064752	0.0220907	0.00576217	0.00603721	0.00517457	0.00680759	0.0731089	0.00503554
0.92652	0.0031356	0.0039787	0.00424317	0.00405284	0.00658483	0.00486599	0.00616981	0.00649826	0.00497	0.0244286	0.00455215
0.854963	0.00301069	0.00294849	0.00499107	0.0038754	0.0109703	0.00457178	0.00529792	0.0225869	0.00656002	0.0751489	0.00507531
0.16916	0.00333191	0.00292295	0.0134549	0.00713524	0.119192	0.0105657	0.0054493	0.0459873	0.0782434	0.53666	0.00789717
0.932404	0.00305113	0.00281703	0.00407264	0.00415729	0.0111082	0.00572566	0.00621163	0.0106084	0.00870092	0.00712386	0.00401961
0.816366	0.00251973	0.00306755	0.00612591	0.00355886	0.0281033	0.00593203	0.0084076	0.0463658	0.00832162	0.0647437	0.00648811
0.922909	0.00320536	0.00308036	0.00331722	0.00409955	0.00590454	0.00431088	0.00478527	0.00827609	0.00674869	0.028519	0.00484403
0.882125	0.00316436	0.00330331	0.00362999	0.00393758	0.00921939	0.0051198	0.00585846	0.00890381	0.00609952	0.0644932	0.00414592
0.52174	0.00467963	0.0131299	0.00585634	0.0074687	0.0493846	0.00503808	0.0340844	0.0619336	0.0992003	0.147803	0.0496811
0.864047	0.00278661	0.00333099	0.00344325	0.0035613	0.00452973	0.00348307	0.00367392	0.00705633	0.00428858	0.0951013	0.00469827
0.941305	0.00334641	0.00350903	0.00413885	0.00418313	0.00777168	0.0059747	0.00630783	0.00616533	0.00562773	0.00797863	0.00369132
0.887507	0.0031053	0.00269671	0.00313987	0.00405486	0.00708543	0.00420209	0.00524412	0.0284536	0.0121521	0.0357782	0.00658067
0.521003	0.0018809	0.00337476	0.00639229	0.00376177	0.0116582	0.00452075	0.00418507	0.044079	0.119982	0.267706	0.0114567
0.79921	0.00280955	0.0030931	0.00528712	0.00328379	0.0287151	0.00606898	0.0157337	0.0275953	0.0322856	0.0710036	0.00491452
0.84419	0.00285152	0.0025243	0.00301693	0.00394038	0.00791662	0.00386847	0.00319926	0.0139646	0.00661925	0.0965917	0.0113165
0.921491	0.00304963	0.0043435	0.00265476	0.00443984	0.00489028	0.00530595	0.00500393	0.00581496	0.00517154	0.0344645	0.00337036
0.841668	0.00353937	0.00353869	0.00459251	0.00428796	0.0238895	0.00601996	0.00780643	0.0194412	0.0125907	0.0682143	0.00441181
0.883777	0.00303864	0.00323934	0.00346492	0.0052197	0.00803628	0.00416382	0.00513637	0.0176427	0.00565274	0.0561336	0.00449525
0.917333	0.00279585	0.00318077	0.00366582	0.00362568	0.0177205	0.0044241	0.0056328	0.00524377	0.00400362	0.027205	0.00516919
0.925352	0.00333954	0.00325814	0.0052187	0.0038983	0.0125246	0.00541745	0.00614819	0.00591528	0.00726382	0.0177724	0.00389142
0.940464	0.00292476	0.00378665	0.00276068	0.00404002	0.00681874	0.00516863	0.00504871	0.00612688	0.00577186	0.0139193	0.00317013
0.493471	0.0106305	0.00607421	0.0407598	0.0063178	0.0419747	0.0201121	0.0283031	0.0574166	0.115868	0.162463	0.0166087
0.685822	0.00960545	0.00502278	0.00320408	0.00393223	0.0185179	0.0028872	0.00209148	0.0669531	0.0195533	0.0639834	0.118427
0.219415	0.0128136	0.0125356	0.0600849	0.0128302	0.13871	0.0225999	0.0465903	0.0645414	0.186599	0.198894	0.0243863
0.77057	0.00357289	0.00483325	0.00676512	0.00324449	0.0287123	0.00467162	0.0237848	0.0487775	0.053466	0.0451067	0.0064959
0.828066	0.00235103	0.00280168	0.00482009	0.00333251	0.116061	0.00452417	0.00560706	0.00455474	0.0038252	0.0175019	0.00655467
0.697228	0.00237388	0.00257018	0.0192937	0.019926	0.0229119	0.00607331	0.00389585	0.00722302	0.00279669	0.213091	0.00261705
0.792959	0.00267257	0.00428466	0.00248004	0.00477066	0.00784381	0.00550844	0.00403881	0.00752313	0.00774711	0.157035	0.00313702
0.0427122	0.00300548	0.00558094	0.00209397	0.00493283	0.00357685	0.00307163	0.0023079	0.00659861	0.00347945	0.911148	0.0114918
0.912135	0.00275729	0.00277163	0.00474436	0.00427689	0.0286235	0.00542221	0.012219	0.00786884	0.006929	0.00660654	0.00564565
0.580344	0.00157721	0.0020214	0.141037	0.00654513	0.106849	0.00315076	0.00700721	0.0696633	0.0182043	0.0536903	0.00991117
0.893711	0.00329026	0.00295089	0.00297818	0.00355707	0.0066532	0.0046891	0.00530563	0.0226416	0.0167454	0.0317995	0.0056782
0.484618	0.00349008	0.00282728	0.0456104	0.00956471	0.0376304	0.0702757	0.0119766	0.0430292	0.0188684	0.265034	0.0070754
0.693104	0.00649358	0.0258586	0.00684452	0.0198078	0.0153481	0.0102893	0.0189453	0.00525897	0.00968965	0.181141	0.00721924
0.789189	0.00203953	0.0332371	0.00336944	0.00372955	0.0153478	0.0112755	0.00542449	0.0913802	0.0116885	0.0278835	0.00543546
0.358255	0.005968	0.0083037	0.0116041	0.00690367	0.0543043	0.0163569	0.00754257	0.0634352	0.016771	0.305563	0.144992
0.930109	0.00296762	0.00336	0.00295585	0.00452439	0.0100977	0.00538833	0.00579111	0.00759654	0.0102507	0.0128851	0.00407388
0.902979	0.00249477	0.00256861	0.00265323	0.00347799	0.0188012	0.00359265	0.00387704	0.00563595	0.0147252	0.0335192	0.00567534
0.779178	0.00276039	0.00264666	0.00498676	0.0028525	0.00820897	0.00303267	0.00562723	0.030134	0.0185132	0.129917	0.0121426
0.833967	0.00257707	0.00453303	0.00346956	0.00425462	0.0269019	0.00631632	0.00473208	0.00605414	0.00983337	0.0944978	0.0028627
0.5835	0.000903271	0.00943412	0.00467095	0.00449846	0.0649515	0.0116762	0.00519684	0.00731608	0.0197126	0.287712	0.00042803
0.497011	0.00202598	0.00602935	0.00137359	0.000805338	0.0011466	0.00166999	0.00420381	0.329749	0.0179284	0.0640647	0.073992
0.627029	0.00233143	0.00213758	0.0132605	0.00367111	0.120354	0.00865722	0.00888211	0.0368716	0.0581422	0.103191	0.0154724
0.910117	0.0029029	0.00327344	0.0034546	0.00423919	0.00751286	0.00496424	0.00443071	0.00638293	0.00444644	0.0441131	0.00416277
0.569035	0.00332937	0.00641942	0.00362013	0.00154635	0.00250021	0.00184477	0.00441362	0.0558004	0.0254645	0.266017	0.0600088
0.941049	0.00320458	0.00317389	0.00406342	0.0041781	0.00668155	0.00556498	0.00621126	0.00686517	0.00651825	0.00845084	0.00403925
0.252326	0.0145128	0.0240646	0.00103121	0.00169567	0.00381243	0.00436032	0.209462	0.222768	0.187245	0.0671762	0.0115458
0.0701213	0.00155052	0.00895451	0.0216179	0.00630776	0.203731	0.00464208	0.0206949	0.150814	0.0261966	0.475992	0.00937824
0.941063	0.00343242	0.00321001	0.00377585	0.00404201	0.00653293	0.005137	0.00707983	0.00668427	0.0060097	0.00893924	0.00409348
0.716517	0.00260136	0.0148819	0.00294038	0.00492842	0.00730391	0.00559411	0.00621214	0.0064806	0.0055084	0.216705	0.0103266
0.938087	0.00295811	0.0031014	0.00405374	0.00435594	0.00919066	0.00619785	0.00659444	0.00936829	0.005864	0.00684042	0.00338842
0.705513	0.00261377	0.00475633	0.00370627	0.0033934	0.00564825	0.00608068	0.00577492	0.0273786	0.00860821	0.223523	0.00300319
0.563671	0.00167722	0.00233702	0.00346724	0.0221508	0.160006	0.0307432	0.0376808	0.0896174	0.0212089	0.0613253	0.00611594
0.542224	0.00286822	0.00345905	0.00432164	0.000749107	0.00829318	0.00147643	0.00713589	0.142423	0.0548477	0.14686	0.0853423
0.682921	0.00674717	0.00390749	0.00488145	0.00535004	0.0440042	0.00372444	0.0268496	0.0404051	0.0278217	0.0188601	0.134528
0.829646	0.00254731	0.0029918	0.0031372	0.00422481	0.0569709	0.00470307	0.00843358	0.0163434	0.0470887	0.0169807	0.00693272
0.861285	0.00377976	0.00364323	0.00434562	0.00613735	0.00630786	0.00506425	0.00563559	0.00686804	0.00533293	0.0864713	0.00512874
0.940008	0.00328801	0.00324409	0.00307025	0.00416852	0.0065064	0.00489041	0.00545494	0.00595723	0.005838	0.0138181	0.00375576
0.107244	0.000932366	0.00523494	0.00355541	0.00217173	0.0644908	0.000579779	0.00175431	0.149696	0.0740421	0.275555	0.314743
0.742669	0.0021183	0.00506363	0.00419211	0.00285532	0.203686	0.00734653	0.0108681	0.0066037	0.0071488	0.00439171	0.0030576
0.901785	0.00258847	0.00360099	0.00316362	0.00356456	0.00666665	0.00442533	0.00438169	0.00779116	0.00473278	0.0516519	0.0056476
0.657095	0.00429188	0.00308734	0.00265603	0.00322657	0.00321053	0.00331669	0.002998	0.0106239	0.00753179	0.298572	0.0033905
0.903108	0.0033869	0.00399754	0.00318626	0.00331123	0.00696473	0.00578499	0.00599188	0.0202419	0.0133177	0.0268838	0.00382559
0.854184	0.0024551	0.00309581	0.00745271	0.00373605	0.0161556	0.00455589	0.00509062	0.0261402	0.00897994	0.0602684	0.00788536
0.78785	0.00273202	0.00303336	0.00282366	0.00249109	0.00556413	0.00384796	0.0186661	0.10939	0.0254834	0.0350508	0.00306736
0.479929	0.00258105	0.0232065	0.00314834	0.00212813	0.180853	0.0206561	0.00543491	0.00359925	0.0028397	0.271216	0.00440864
0.120467	0.00324543	0.00527868	0.00298648	0.00162608	0.00132319	0.000516283	0.00176737	0.208849	0.0206105	0.567947	0.0653829
0.889475	0.00396903	0.0056979	0.00379219	0.00261087	0.00636822	0.00508217	0.00925441	0.0349693	0.018032	0.0167469	0.00400225
0.797031	0.00279098	0.00265317	0.00939891	0.00336234	0.0298054	0.00353848	0.00633788	0.0199271	0.0110579	0.108633	0.0054646
0.918217	0.00239129	0.00297424	0.00294465	0.00471805	0.018474	0.00363469	0.00395643	0.0063662	0.00398551	0.0250237	0.00731384
0.550536	0.00224923	0.0050125	0.00268363	0.00291371	0.0147883	0.00244969	0.00160863	0.0129919	0.0122726	0.388217	0.00427652
0.907992	0.00310836	0.00318799	0.00314088	0.00349625	0.00754925	0.00472936	0.00564226	0.00719205	0.0115571	0.0386778	0.00372713
0.794293	0.00276756	0.00357284	0.00395464	0.00299024	0.00489638	0.00370206	0.00476907	0.013527	0.00680062	0.12931	0.0294167
0.806416	0.00214837	0.00389231	0.00352473	0.00309305	0.0104284	0.00227174	0.003274	0.00652208	0.00260061	0.145484	0.0103451
0.836756	0.00212888	0.00375477	0.00632567	0.00505376	0.10731	0.00501256	0.011718	0.00898796	0.00592104	0.00313133	0.0038998
0.247806	0.00123692	0.0732414	0.000903892	0.000374026	0.00048772	0.000431799	0.00489697	0.602945	0.0112574	0.0490853	0.00733355
0.409991	0.00192804	0.00312397	0.00945846	0.00465977	0.0111007	0.00175891	0.00200388	0.0541633	0.104929	0.388287	0.00859568
0.545644	0.00190074	0.00611316	0.00266041	0.00210617	0.130699	0.00310951	0.0135374	0.114968	0.081397	0.0776623	0.0202031
0.700091	0.00309042	0.00215577	0.0024418	0.00296567	0.00724861	0.00343424	0.0535362	0.116832	0.0640935	0.039526	0.00458547
0.111099	0.00106801	0.00353778	0.0152123	0.057126	0.588499	0.0865619	0.0392915	0.00230339	0.0871623	0.00499125	0.00314765
0.160564	0.0023507	0.00413723	0.00187981	0.00141157	0.0148017	0.000512023	0.00150231	0.0203834	0.0076598	0.702468	0.0823291
0.921707	0.00367198	0.00427029	0.00397318	0.00485105	0.0143574	0.00580093	0.00973401	0.00939647	0.00967668	0.0102476	0.00231316
0.246782	0.019684	0.00686829	0.00501839	0	0.025274	0.00177197	0.0722506	0.346318	0.0262629	0.0902677	0.159503
0.310774	0.00336248	0.0129016	0.0408605	0.00804845	0.0691995	0.0191243	0.0252976	0.112783	0.0467465	0.32217	0.0287323
0.939708	0.00292337	0.00355866	0.00355902	0.00402276	0.00687866	0.00544112	0.0058127	0.00527846	0.00478605	0.0141654	0.00386554
0.337213	0.00293892	0.0147933	0.00197782	0.000470166	0.00102265	0.000913359	0.0162876	0.293624	0.0275028	0.240362	0.0628947
0.936649	0.0032562	0.00373022	0.00286239	0.00414913	0.00549882	0.00573314	0.0057066	0.00608216	0.00616554	0.0165428	0.00362442
0.472969	0.000751101	0.0743087	0.00107331	0.00144812	0.0189181	0.0101749	0.0405792	0.148029	0.171789	0.0409324	0.019027
0.47136	0.00188836	0.00421976	0.00152965	0.00597557	0.00539494	0.00244725	0.00204885	0.00469548	0.0201066	0.479892	0.000441942
0.837479	0.00217076	0.00298101	0.00357352	0.00447105	0.00285949	0.00266546	0.00212567	0.0176952	0.00162699	0.117584	0.00476859
0.744315	0.00196626	0.00367621	0.002702	0.00223616	0.00933386	0.000352546	0.00273228	0.0165992	0.0107671	0.199048	0.00627176
0.934737	0.00331973	0.0030619	0.00467548	0.00397012	0.00907648	0.00515239	0.0106648	0.00738863	0.00697643	0.00689675	0.00408004
0.920344	0.0030122	0.00318419	0.00349952	0.00431755	0.00643203	0.00492728	0.00490266	0.0115889	0.00622588	0.0266049	0.00496085
0.721389	0.00254849	0.00181549	0.00381356	0.0047031	0.0110062	0.00356819	0.00256316	0.011539	0.0315981	0.190387	0.0150688
0.904992	0.0025548	0.00292821	0.00454416	0.00453395	0.0289439	0.00378999	0.00472381	0.00564546	0.00357926	0.0272349	0.00652909
0.221501	0.0151415	0.00421151	0.0525805	0.0105463	0.0512171	0.012108	0.0731257	0.17966	0.203915	0.0664904	0.109503
0.683326	0.00264625	0.00489822	0.00361084	0.00438805	0.00599587	0.00524846	0.00404578	0.00741836	0.00542992	0.268704	0.00428767
0.938852	0.00317116	0.00323754	0.00403047	0.00407786	0.00862828	0.00513611	0.00621374	0.00751555	0.00528288	0.00910229	0.00475239
0.373585	0.0139864	0.0244239	0.0157264	0.00586396	0.286657	0.0225783	0.0315402	0.11564	0.0635916	0.0292481	0.0171598
0.732037	0.00233243	0.00370828	0.00944063	0.0264969	0.0179891	0.0120051	0.0138742	0.0255575	0.0145801	0.138015	0.00396348
0.366807	0.0104823	0.0296713	0.00758843	0.00124948	0.0137812	0.0153009	0.00812602	0.077148	0.0667917	0.300982	0.102072
0.929305	0.00310176	0.00351547	0.00309286	0.0040828	0.00770457	0.00473214	0.00492727	0.00672983	0.00821501	0.0198965	0.0046969
0.930584	0.00328073	0.0035797	0.00401819	0.00382447	0.00774109	0.00595896	0.00804449	0.0125808	0.00714115	0.00901569	0.00423104
0.861591	0.00330746	0.00282244	0.00663597	0.00289324	0.0417587	0.00934045	0.00858734	0.017594	0.0122507	0.0269094	0.00630939
0.759008	0.00319175	0.00545486	0.00688918	0.0135906	0.0207904	0.005267	0.00738564	0.0223865	0.0855552	0.0662385	0.00424274
0.917896	0.00208954	0.00530144	0.00339727	0.00369198	0.00591343	0.00592581	0.00593	0.00522609	0.00459979	0.0382056	0.00182271
0.926937	0.00284759	0.00284018	0.00274279	0.00383634	0.00663378	0.00386444	0.00410541	0.0114462	0.00674431	0.022291	0.00571085
0.823021	0.00330199	0.00597658	0.00416184	0.00302759	0.013419	0.00928586	0.0191386	0.0165441	0.0768381	0.0229509	0.00233417
0.829361	0.00301029	0.00300284	0.00261547	0.0038769	0.00410384	0.00422542	0.00420194	0.0207417	0.0458061	0.07072	0.00833452
0.892634	0.00276853	0.00349141	0.0037765	0.00369662	0.00717004	0.00523943	0.00528654	0.00844133	0.0051672	0.0605928	0.00173586
0.928668	0.00243839	0.00478071	0.0031756	0.00396685	0.0087114	0.00677412	0.00637145	0.00545805	0.00692647	0.0206918	0.00203743
0.869204	0.00388695	0.00441702	0.00300845	0.00261126	0.00518755	0.00330608	0.00653038	0.043422	0.0124305	0.0406632	0.0053331
0.65908	0.00557515	0.00385856	0.0106469	0.00808675	0.0585456	0.0335254	0.109286	0.0171188	0.0376776	0.0369581	0.0196414
0.86257	0.00356646	0.00428766	0.00309808	0.00298646	0.00411715	0.00370934	0.00503066	0.0129924	0.00828781	0.082012	0.00734172
0.0629405	0.0204816	0.163554	0.0225556	0.0430881	0.0386303	0.0181657	0.156464	0.278806	0.12525	0.0522286	0.017836
0.906841	0.00220133	0.00399285	0.00309765	0.00486409	0.0361836	0.00398537	0.00459608	0.00375235	0.00688601	0.0170867	0.00651326
0.919141	0.00315273	0.00312865	0.00392523	0.00373805	0.00812196	0.0045908	0.0056287	0.00890232	0.00566969	0.029534	0.00446659
0.845729	0.00263954	0.00327517	0.00672103	0.0165373	0.0351425	0.0123138	0.0237365	0.0242206	0.0108713	0.0151897	0.00362339
0.645069	0.00394735	0.00844397	0.00230167	0.00143897	0.00937445	0.00335799	0.0163861	0.191762	0.0534574	0.0596743	0.00478638
0.706153	0.00455851	0.00284847	0.0195146	0.00956929	0.0313046	0.00566018	0.0198968	0.0653042	0.0188388	0.0982234	0.0181281
0.51596	0.00252121	0.00400661	0.00547381	3.97585e-05	0.0186406	0.00373793	0.00818736	0.025651	0.210528	0.191478	0.0137765
0.456965	0.00731208	0.0294756	0.00104673	0.0013189	0.0200464	0.00121287	0.0014152	0.0404176	0.13841	0.11984	0.18254
0.910977	0.00331904	0.00323175	0.00470071	0.00399106	0.0165146	0.00582897	0.00696251	0.011743	0.0145725	0.0137726	0.00438662
0.721516	0.00479966	0.0039737	0.00448811	0.00174182	0.00529425	0.00396802	0.00780998	0.063994	0.0510756	0.12697	0.00436834
0.935647	0.00228533	0.0043095	0.00216567	0.00531849	0.00556604	0.00494334	0.00527844	0.00631399	0.00877824	0.0144888	0.00490555
0.932994	0.00298438	0.00349901	0.00375468	0.00386585	0.00837506	0.00579518	0.00663159	0.00527431	0.0113152	0.0115614	0.00394928
0.753942	0.00372836	0.00494776	0.00281977	0.00212233	0.00286822	0.0021069	0.00381309	0.03559	0.00708924	0.168205	0.0127673
0.517292	0.00847006	0.00324848	0.0233105	0.00786427	0.0396535	0.012653	0.0331232	0.0502729	0.0786096	0.21388	0.0116223
0.931339	0.00329992	0.00321507	0.00427621	0.00423909	0.00736655	0.00558963	0.00682334	0.00739964	0.00732127	0.0146357	0.00449431
0.619069	0.00461277	0.00394861	0.00430003	0.0041268	0.10152	0.00532248	0.097711	0.0502809	0.0709304	0.0251501	0.0130277
0.929193	0.0026282	0.00283155	0.00341567	0.00465591	0.0223218	0.0052602	0.00574102	0.00522848	0.00566561	0.00884767	0.00421053
0.932512	0.00331532	0.00332859	0.00297424	0.00384157	0.00585599	0.00450148	0.00495811	0.00797051	0.00631736	0.0206233	0.0038015
0.936877	0.00320955	0.00337067	0.00386157	0.00403552	0.00684504	0.00515664	0.00586699	0.00657281	0.00597006	0.0141022	0.00413194
0.346595	0.00116852	0.138331	0.00455769	0.0289271	0.304823	0.017843	0.0605815	0.00994587	0.0225532	0.0637589	0.000915633
0.892581	0.00319587	0.00476107	0.00330264	0.00392571	0.00572395	0.00453722	0.00522921	0.00680706	0.00533251	0.0617437	0.00285988
0.883121	0.00230666	0.00633014	0.00269364	0.00533695	0.0122961	0.00628572	0.00309334	0.00407177	0.0241676	0.0452803	0.00501645
0.926803	0.00304805	0.00352889	0.00264309	0.00387261	0.0112765	0.00667078	0.00661025	0.0148557	0.0103043	0.00751339	0.00287343
0.651793	0.00489964	0.00340434	0.00333807	0.00541074	0.00733792	0.00197912	0.00437574	0.0186189	0.00413611	0.288862	0.00584464
0.941689	0.00313688	0.0032496	0.00314228	0.00417332	0.00651613	0.00581179	0.00570334	0.00700346	0.00663164	0.00905156	0.00389101
0.93523	0.00334505	0.00355418	0.00349689	0.0034705	0.00541233	0.00516737	0.00584818	0.00662699	0.00583716	0.0177394	0.00427152
0.452798	0.000878006	0.00464773	0.0115933	0.00605846	0.464975	0.010798	0.00764397	0.0017746	0.0217372	0.0136033	0.00349291
0.449585	0.00357786	0.0043862	0.00170086	0.0126033	0.00592822	0.00522333	0.00388505	0.0023844	0.0406316	0.467659	0.00243519
0.525923	0.00525515	0.00297891	0.0446557	0.0115763	0.0516017	0.00734637	0.0301368	0.0508333	0.155306	0.105222	0.00916383
0.908569	0.00262584	0.00332936	0.00230725	0.00463804	0.0165006	0.00277482	0.00374303	0.0142082	0.0107428	0.0246712	0.00588956
0.830419	0.00281052	0.00264762	0.009202	0.00745733	0.0383162	0.00525655	0.00719839	0.0467161	0.00854417	0.0360336	0.00539855
0.861685	0.0028868	0.00379825	0.00317167	0.00312632	0.00610832	0.00383858	0.00442739	0.00742303	0.00441798	0.0942823	0.00483398
0.928414	0.00310286	0.00360717	0.00466708	0.00577607	0.00693088	0.00657237	0.00771102	0.0059231	0.00656807	0.017182	0.003545
0.886486	0.00280125	0.00411933	0.00213964	0.00476617	0.0217709	0.00531795	0.00666173	0.00664249	0.0104553	0.0464851	0.00235382
0.922155	0.00329933	0.00337586	0.00352176	0.004435	0.00859791	0.00575471	0.00960883	0.0124353	0.0115844	0.0116269	0.00360457
0.905419	0.00408247	0.00393302	0.00318506	0.00282858	0.00492934	0.00517509	0.0107237	0.02279	0.0152701	0.0170805	0.0045828
0.00789431	0.00403049	0.0085406	0.00324124	0.00602362	0.00727373	0.00527464	0.0043591	0.00437408	0.00392462	0.9421	0.00296331
0.537887	0.00302718	0.0188076	0.213279	0.00869141	0.00985039	0.00396768	0.00783208	0.101688	0.0306108	0.0587284	0.00563042
0.792748	0.00314765	0.00368397	0.00493225	0.00586861	0.0523657	0.00838969	0.018718	0.0360739	0.0358695	0.0338597	0.00434335
0.922066	0.00329798	0.00391932	0.00499503	0.00333578	0.00911156	0.00584247	0.00738788	0.0141726	0.00812555	0.0137699	0.00397593
0.926378	0.00332993	0.00335216	0.00359147	0.00427717	0.00669022	0.0056288	0.00770209	0.0129676	0.00930363	0.0127201	0.00405916
0.711034	0.00190549	0.00662807	0.0115607	0.0806068	0.0273053	0.000726832	0.00539787	0.0861973	0.00616397	0.0284764	0.0339973
0.646511	0.00265249	0.00586719	0.003818	0.00648379	0.0111132	0.0102123	0.00510187	0.013396	0.010766	0.282075	0.00200306
0.931995	0.00299803	0.00318321	0.00311912	0.00424314	0.0124259	0.00539088	0.00577627	0.00677249	0.00682922	0.0129489	0.00431825
0.84124	0.00294282	0.00717386	0.00453218	0.00471477	0.0117136	0.00335251	0.00510194	0.00587546	0.00694753	0.0720472	0.0343582
0.884179	0.00268786	0.00405732	0.00227841	0.00511852	0.00644588	0.00483896	0.00403334	0.00534117	0.00587494	0.0712492	0.00389506
0.658598	0.00107641	0.0388915	0.00313529	0.00234647	0.00485435	0.00187383	0.0240061	0.108467	0.00868383	0.13471	0.0133568
0.906593	0.00322449	0.00282677	0.00304625	0.00342226	0.00426313	0.00485159	0.00443397	0.00651645	0.00534871	0.0522607	0.00321318
0.651034	0.00325931	0.00409645	0.00348681	0.00424449	0.00383936	0.00307395	0.00259653	0.0193279	0.00482676	0.288506	0.0117084
0.395828	0.0264864	0.0038845	0.0581641	0.00891072	0.0273447	0.0278465	0.0498788	0.0666976	0.0718636	0.207564	0.0555307
0.931397	0.00321228	0.00334498	0.00461822	0.0042479	0.00759163	0.00532006	0.00581736	0.00792359	0.00542208	0.0163535	0.00475155
0.622869	0.00115281	0.00840513	0.00225236	0.0043312	0.0530177	0.00265935	0.00538707	0.00720123	0.00786296	0.279348	0.00551358
0.80579	0.00333338	0.0041915	0.00459695	0.00284202	0.0281003	0.00488739	0.0171971	0.0250878	0.0487008	0.0489523	0.0063205
0.210142	0.00951773	0.00445599	0.0423551	0.00812516	0.0422496	0.00554232	0.0158941	0.0429644	0.0213606	0.574555	0.0228385
0.86529	0.00328446	0.00246511	0.00271688	0.00356459	0.0241805	0.00270358	0.00381798	0.0235835	0.00795943	0.0379041	0.0225301
0.926254	0.00309868	0.00290028	0.00297428	0.00414761	0.00676997	0.00426851	0.00443915	0.00625094	0.00629931	0.0272211	0.00537627
0.876353	0.0028644	0.00368748	0.00383979	0.00365578	0.00852743	0.00391073	0.00487389	0.0256822	0.00682406	0.0521186	0.00766292
0.442967	0.0027916	0.00700002	0.00216025	0.130699	0.0188775	0.0333971	0.00899378	0.00441609	0.0254023	0.318957	0.0043388
0.191821	0.000914169	0.00628226	0.000793982	0.00811058	0.00513979	0.00129617	0.000719967	0.00184574	0.03073	0.728967	0.0233787
0.00634996	0.00595564	0.00589481	0.00385343	0.237369	0.0265044	0.00322851	0.00184815	0.00143477	0.00422742	0.701327	0.00200751
0.840128	0.00328465	0.00314551	0.00735814	0.00615886	0.021918	0.00435589	0.0078257	0.0310327	0.0173072	0.0525392	0.00494628
0.939508	0.00342526	0.00302491	0.00327046	0.00496759	0.00600381	0.00492479	0.00521784	0.00556614	0.00531476	0.0144118	0.00436468
0.929756	0.00343691	0.00364218	0.00382408	0.00372777	0.00961766	0.00477992	0.00550445	0.00681691	0.00714315	0.0170772	0.00467382
0.910303	0.00217944	0.00375027	0.00323696	0.00481994	0.00742003	0.00553059	0.00478074	0.00549414	0.00420279	0.0450722	0.00321002
0.53176	0.00160248	0.0286596	0.00287666	0.00568558	0.014172	0.00825852	0.00503907	0.00561963	0.33119	0.0586706	0.00646575
0.902214	0.00336642	0.0032248	0.00308261	0.00378428	0.00514726	0.00425158	0.00495954	0.00967793	0.00496166	0.0499908	0.00533927
0.835874	0.00217519	0.0034751	0.00504414	0.00383838	0.0769883	0.00556736	0.00586359	0.00523957	0.00324129	0.044076	0.00861723
0.776988	0.00243492	0.00575868	0.00487314	0.00177285	0.0170752	0.00218358	0.00501795	0.104951	0.0128724	0.0581845	0.0078876
0.861784	0.0024817	0.00308493	0.00988893	0.0264655	0.0348596	0.00921391	0.0195021	0.00428459	0.00933082	0.0141173	0.00498665
0.798662	0.00252025	0.0024628	0.00214599	0.00387889	0.0367238	0.0034707	0.00381178	0.0100665	0.0707744	0.0603061	0.00517681
0.928532	0.00304361	0.00457022	0.00415571	0.00314946	0.0158751	0.00699131	0.00913919	0.00717033	0.00779882	0.00718406	0.00239043
0.934064	0.0030037	0.00308595	0.00350427	0.00516902	0.0152476	0.00537525	0.00505205	0.00609058	0.00558736	0.00918232	0.00463741
0.899376	0.00299832	0.00307647	0.00665364	0.00743001	0.0109055	0.00580507	0.00879909	0.00989619	0.00662844	0.0339267	0.00450496
0.817606	0.00286787	0.00321532	0.00359725	0.0045751	0.00674118	0.0048144	0.00413802	0.00887538	0.00541265	0.133815	0.00434242
0.820146	0.00313014	0.00274005	0.0119431	0.00397901	0.0157165	0.00518043	0.00528698	0.0444999	0.0093919	0.0671088	0.0108771
0.893275	0.00353056	0.00388468	0.00299714	0.00280069	0.0071811	0.0046358	0.0127219	0.0292266	0.0258704	0.00941119	0.00446462
0.939967	0.00314847	0.00307741	0.00398165	0.00486163	0.00796832	0.0056596	0.00628807	0.00631398	0.00601225	0.0082961	0.00442553
0.741806	0.00271262	0.00295114	0.00147545	0.00610963	0.0163464	0.00213048	0.00257004	0.00586117	0.124601	0.0897726	0.00366323
0.943096	0.00323594	0.00286535	0.00342619	0.00459759	0.00784145	0.00481999	0.00516221	0.00543037	0.00543512	0.0096926	0.00439707
0.341278	0.00116061	0.0293469	0.00391515	0.0224105	0.00772772	0.0150621	0.0678298	0.0100358	0.0309235	0.426223	0.0440868
0.691319	0.0161585	0.00348932	0.00255337	0.00284737	0.00836679	0.00285744	0.0029291	0.0447067	0.0345671	0.0791036	0.111101
0.772683	0.00258949	0.00394329	0.00281143	0.00412	0.00873592	0.00559399	0.0036453	0.0102614	0.00606798	0.174125	0.00542309
0.756794	0.00140302	0.00346683	0.0031453	0.00682963	0.0177217	0.00347715	0.00259905	0.00797026	0.142636	0.0435809	0.0103764
0.743117	0.00208184	0.00311219	0.0046351	0.00678434	0.116871	0.00235562	0.0110564	0.00434625	0.0052743	0.089206	0.0111598
0.92816	0.00323192	0.00370126	0.00535631	0.00485985	0.00779697	0.00645168	0.00863342	0.00832576	0.00725444	0.0124909	0.00373772
0.937207	0.00342786	0.003153	0.00394167	0.00373321	0.00577694	0.0048856	0.00622056	0.00687898	0.00650809	0.013651	0.00461612
0.244207	0.00340771	0.201029	0.000701896	0.00413483	0.130389	0.00252532	0.0358334	0.0194707	0.352019	0.00436767	0.00191436
0.816375	0.00385616	0.0076148	0.00272712	0.00212546	0.0045919	0.00321831	0.00645628	0.0308972	0.0169321	0.10308	0.00212555
0.591668	0.00281268	0.00373083	0.00245818	0.00408937	0.0339065	0.00369803	0.00358752	0.00303991	0.00609045	0.343343	0.0015758
0.786422	0.00285398	0.00315947	0.015841	0.00327994	0.123321	0.00861632	0.0106527	0.00800156	0.0148047	0.0191571	0.00389036
0.807938	0.00243465	0.00409867	0.00482296	0.00315872	0.0651441	0.0032347	0.00589431	0.0108948	0.00394277	0.0830509	0.00538578
0.815628	0.0027044	0.00339792	0.00365182	0.0049607	0.0274095	0.00361864	0.0045959	0.00630478	0.0135536	0.106399	0.00777515
0.385601	0.0840446	0.0111538	0.00934183	0.000431314	0.027918	0.00891476	0.0600074	0.144846	0.163235	0.0510159	0.0534901
0.59585	0.0066694	0.0401378	0.00502815	0.00753364	0.0539914	0.00845016	0.0455578	0.0371608	0.0844795	0.0809554	0.034186
0.605942	0.00310631	0.00665684	0.0234679	0.000675381	0.0596244	0.00665858	0.0547568	0.0708397	0.0652773	0.0913137	0.0116809
0.404189	0.00184031	0.000205279	0.0230851	0.232348	0.0486549	0.132317	0.0668927	0.0142247	0.0270227	0.0455451	0.00367491
0.843912	0.00253685	0.00227989	0.00378253	0.00349305	0.0189036	0.00368236	0.0104754	0.0653513	0.00563692	0.0338711	0.00607526
0.877616	0.0030192	0.00307543	0.00276543	0.00640157	0.0077631	0.0033836	0.00407166	0.00465171	0.0229839	0.061028	0.0032403
0.908315	0.00319621	0.00517732	0.0036956	0.00291222	0.00553583	0.0039055	0.00555416	0.00892742	0.0043433	0.0438388	0.00459844
0.710793	0.00436816	0.00912428	0.00833346	0.0263796	0.0145738	0.0210491	0.0294447	0.00863355	0.0235818	0.135406	0.00831254
0.913252	0.00300737	0.00294152	0.00487749	0.00427865	0.0274822	0.00415849	0.00497603	0.0068507	0.00561319	0.0170457	0.00551705
0.897047	0.00294815	0.00292051	0.00334804	0.00364409	0.00753535	0.00384728	0.00424706	0.00676374	0.00416019	0.0581663	0.00537192
0.942238	0.00312803	0.00302087	0.00402666	0.00475207	0.00784499	0.00489608	0.0055695	0.00576027	0.00510884	0.00868215	0.00497247
0.00602977	0.0725847	0.125989	0.0092605	0.00250749	0.00239286	0.0132677	0.03193	0.128832	0.13258	0.266297	0.208329
0.941785	0.00348472	0.00320388	0.00384362	0.0042186	0.00638574	0.00532338	0.00593884	0.00575681	0.00540096	0.0107132	0.00394548
0.0467812	0.00308586	0.00744533	0.00332887	0.00210159	0.00715142	0.00107054	0.00158452	0.031366	0.0065205	0.706933	0.182631
0.668167	0.0182859	0.137831	0.00124738	0.00412247	0.0130597	0.00388525	0.00232157	0.0602542	0.0136897	0.0502727	0.0268632
0.467656	0.00478061	0.00537476	0.00124985	0.00205961	0.00872119	0.00272248	0.00593932	0.146409	0.232797	0.0991194	0.0231709
0.668057	0.00397124	0.00454252	0.00341181	0.00398633	0.008813	0.00561187	0.00483484	0.0116159	0.0119156	0.26955	0.00369023
0.724204	0.00318183	0.00197721	0.00700578	0.00259127	0.0162247	0.00395654	0.0063175	0.0595711	0.0393536	0.126882	0.00873462
0.909322	0.00234687	0.00358536	0.00245842	0.005832	0.00835904	0.0052607	0.00347213	0.00680211	0.0369492	0.0123415	0.00327024
0.445686	0.00958499	0.00368244	0.036912	0.00484734	0.0248206	0.0119254	0.0289781	0.077503	0.0860401	0.247818	0.0222021
0.610568	0.00668356	0.00600082	0.00623728	0.000969061	0.00344788	0.00321507	0.0232812	0.126544	0.0615339	0.0867684	0.0647507

## Sheet: E02_A_ER
NN outputs for markers (ER)
Cytosol	ER	Golgi	Lysosome	Mitochondria	Nucleus	Peroxisome	PM	Endosome	LD	Protein-Complex	Translation
0.00262891	0.773151	0.0430143	0.0107898	0.00441456	0.00444538	0.0206955	0.101632	0.012898	0.0154185	0.00256176	0.00835112
0.00269643	0.855324	0.019739	0.0357609	0.00403428	0.00203284	0.0335396	0.0220318	0.00646132	0.00834321	0.00203214	0.00800434
0.00263846	0.867731	0.0227643	0.0205227	0.00377091	0.00240047	0.0281343	0.0185617	0.00993264	0.00906636	0.00228054	0.0121967
0.00271734	0.857521	0.0193421	0.0330028	0.00527025	0.0025929	0.0102458	0.0229645	0.00967863	0.0145764	0.00174067	0.0203481
0.00263286	0.753275	0.0842848	0.0920433	0.00259166	0.000835186	0.00837391	0.0344065	0.00708189	0.00642941	0.00111296	0.00693269
0.00250357	0.693648	0.0182548	0.0198972	0.00346848	0.00639936	0.0670366	0.0973235	0.00756383	0.0713093	0.00184795	0.0107477
0.00284179	0.802431	0.0138502	0.0583393	0.0156496	0.00275441	0.0175767	0.0337648	0.0127942	0.0113469	0.00233578	0.0263153
0.00273945	0.789499	0.0616972	0.00658833	0.00390751	0.00163326	0.0107016	0.0680091	0.0203849	0.0235202	0.00154077	0.00977888
0.00297407	0.823886	0.0172581	0.043939	0.00726223	0.00218033	0.0141321	0.0160051	0.0194731	0.00960879	0.00263877	0.0406422
0.00852455	0.292646	0.00433719	0.225718	0.242579	0.0318381	0.171975	0.00921732	0.00375704	0.00288797	0.00206737	0.00445156
0.00302393	0.730551	0.0188633	0.128325	0.00424691	0.00146056	0.0516431	0.0310266	0.0065035	0.00755003	0.00194287	0.0148632
0.00511671	0.696597	0.0418803	0.0385938	0.0043915	0.00181112	0.0104931	0.109923	0.0365791	0.0176574	0.00188656	0.0350695
0.00249393	0.75472	0.0176654	0.170155	0.00266603	0.00174132	0.0160958	0.0129687	0.00709361	0.00760891	0.00130673	0.00548471
0.00235118	0.805871	0.0907513	0.00824976	0.00371265	0.00173767	0.0136369	0.0389986	0.00931999	0.0164944	0.00285757	0.00601912
0.00402828	0.69345	0.0219195	0.017683	0.00599844	0.00249003	0.0609362	0.103154	0.0156324	0.0519028	0.00465209	0.0181531
0.00244211	0.629134	0.0113736	0.0226694	0.0546234	0.00456192	0.0932151	0.11131	0.00907093	0.0505841	0.00248375	0.00853181
0.00281879	0.818787	0.0133626	0.0162393	0.00911275	0.00178335	0.0520575	0.0410731	0.0102943	0.0155172	0.00196098	0.0169928
0.00275604	0.876678	0.0251396	0.0149505	0.00373804	0.00215772	0.0111237	0.0295563	0.0104551	0.00876353	0.0021927	0.0124891
0.00303818	0.731119	0.0121079	0.059147	0.0143871	0.00994275	0.0273039	0.0493819	0.0214115	0.01438	0.00311344	0.0546672
0.00274327	0.793288	0.0424823	0.0540958	0.00615573	0.00285225	0.00939052	0.0377208	0.011473	0.0101609	0.00367457	0.0259625
0.00354145	0.157985	0.327064	0.117798	0.151481	0.00322541	0.0500787	0.11878	0.00413398	0.0185732	0.0233341	0.0240057
0.00285947	0.840657	0.0368787	0.0122802	0.00620684	0.00090237	0.00738013	0.036957	0.00740831	0.010224	0.00164823	0.0365976
0.00187491	0.480039	0.0351628	0.258325	0.0511731	0.00551411	0.0520992	0.0812537	0.0117061	0.0118091	0.00281092	0.00823207
0.00291577	0.841081	0.0470998	0.00804017	0.0042937	0.00116623	0.00791412	0.0493243	0.00791104	0.00997574	0.0017172	0.0185604
0.00275001	0.841987	0.0348289	0.0143964	0.00402916	0.00196043	0.00849486	0.0311813	0.0149707	0.011511	0.00266417	0.0312257
0.00288251	0.876492	0.0159262	0.0155886	0.00374431	0.00190707	0.018099	0.0214709	0.00851213	0.0091165	0.00188876	0.0243717
0.00297138	0.870011	0.0195386	0.0223797	0.00488024	0.00071776	0.010902	0.0300048	0.00576824	0.00948832	0.00178807	0.0215498
0.00287102	0.819824	0.0176313	0.0225335	0.00408508	0.00149347	0.0123784	0.0400271	0.0149534	0.0125866	0.00235139	0.0492645
0.106511	0.317175	0.00873417	0.0219405	0.0054512	0.00977139	0.0502643	0.235229	0.0717318	0.142712	0.00290335	0.0275761
0.000745314	0.426826	0.31642	0.0610131	0.005733	0.0358565	0.0179272	0.115382	0.0101013	0.0078889	0.000184523	0.00192255
0.0028681	0.625444	0.144506	0.0129076	0.00450962	0.00290303	0.0135385	0.0968612	0.0225532	0.0121603	0.00145113	0.0602972
0.00225479	0.606182	0.039791	0.167626	0.00349752	0.0128716	0.0340918	0.0859132	0.0153746	0.0117431	0.00272524	0.0179294
0.00156458	0.649304	0.200476	0.0473626	0.00107595	8.86978e-06	0.0420083	0.0211512	0.0156873	0.00975948	0.000147338	0.0114539
0.00206897	0.617075	0.022577	0.151571	0.0152423	0.00363119	0.0816659	0.0781001	0.00596553	0.0140996	0.0021253	0.0058785
0.00394543	0.588571	0.0154594	0.074383	0.0230772	0.00411045	0.16197	0.0764819	0.0110246	0.0277053	0.00283088	0.0104404
0.00285947	0.7233	0.106686	0.0338044	0.0133958	0.000783895	0.00571695	0.0606393	0.00669708	0.0142059	0.000763217	0.0311475
0.00296466	0.52429	0.0158879	0.155045	0.166055	0.00355873	0.0498645	0.060741	0.00470571	0.00828326	0.00268251	0.00592119
0.00253456	0.655921	0.0115231	0.0883378	0.0159567	0.0297417	0.0667105	0.0715538	0.0110805	0.0343033	0.00426851	0.00806862
0.00258951	0.740048	0.024744	0.0167499	0.00634405	0.00171664	0.0535352	0.0964334	0.01269	0.0241021	0.00180091	0.019246
0.000743331	0.465806	0.156658	0.0159059	0.00825391	0.00425344	0.216255	0.0180761	0.00305551	0.104025	0.00355524	0.00341259
0.0164969	0.53077	0.0394568	0.0990758	0.0112959	0.0221845	0.0121332	0.110424	0.0404958	0.0168613	0.0407622	0.0600444
0.000900358	0.221342	0.170764	0.036692	0.0121178	0.232939	0.0790332	0.0402687	0	0.176166	0.00401909	0.0257581
0.00273885	0.85516	0.0322652	0.0142336	0.00517793	0.00159631	0.0170886	0.0457856	0.00628836	0.00943125	0.0019339	0.00829999
0.0159876	0.188918	0.00958488	0.11247	0.00150661	0.0690408	0.0785192	0.224705	0.129761	0.116401	0.0110834	0.042023
0.00248987	0.582878	0.0659562	0.0159003	0.00798319	0.00150992	0.161765	0.11429	0.0101527	0.0243589	0.00333792	0.00937759
0.00274873	0.836231	0.0174526	0.0743684	0.00537394	0.00127918	0.017562	0.0131068	0.00690928	0.00754767	0.0021802	0.0152402
0.00728109	0.31312	0.0191919	0.0469317	0.0138639	0.0578962	0.115765	0.269803	0.0256798	0.0918682	0.00482819	0.0337717
0.00231149	0.670434	0.00592687	0.0852911	0.017061	0.00741623	0.0932194	0.0629453	0.00965263	0.0253331	0.00219984	0.0182092
0.00276974	0.853148	0.0248999	0.0151876	0.0043351	0.00312205	0.017862	0.0351162	0.0187274	0.010271	0.00321475	0.011346
0.00236189	0.792432	0.0305703	0.00968008	0.00908076	0.00206531	0.0114493	0.072016	0.0168071	0.0171706	0.00361274	0.0327541
0.00202394	0.714224	0.067119	0.0516916	0.0079828	0.00693943	0.0489232	0.0330007	0.00312428	0.0403537	0.00276291	0.0218547
0.00251063	0.629282	0.0145963	0.113155	0.0202913	0.00250146	0.0932133	0.106463	0.00515189	0.00681509	0.00203692	0.00398336
0.00258632	0.83843	0.0164607	0.0361727	0.00444189	0.00344127	0.018961	0.0528201	0.00718957	0.00915648	0.00191344	0.00842702
0.00252569	0.727468	0.0709719	0.0110403	0.00766131	0.00050189	0.00410492	0.09546	0.0127404	0.00685984	0.0011809	0.0594846
0.00265744	0.605406	0.0440587	0.0220393	0.0125973	0.00791838	0.0521172	0.147682	0.0295833	0.0162721	0.0051178	0.0545509
0.00302802	0.863806	0.0301635	0.042719	0.00387886	0.000803526	0.008688	0.0180155	0.00870941	0.00961606	0.00160314	0.00896913
0.00383635	0.239019	0.218613	0.0907291	0.217011	0.0182052	0.00251094	0.0390741	0.0173412	0.0228736	0.00768369	0.123103
0.00175264	0.81571	0.039637	0.0676847	0.00339902	0.00179644	0.0345199	0.0144278	0.00712444	0.00622411	0.00202052	0.00570328
0.00258525	0.622789	0.12929	0.0347104	0.0290732	0.00137049	0.0990937	0.0578913	0.00359551	0.00905357	0.00114008	0.0094079
0.00260351	0.821266	0.0118626	0.0473128	0.00603772	0.00225804	0.0155668	0.022079	0.00915043	0.0125713	0.00200814	0.0472837
0.00291991	0.754368	0.0219835	0.0487899	0.00562337	0.0017551	0.015224	0.0497298	0.0135947	0.0135266	0.00353792	0.0689468
0.00408501	0.602703	0.0175652	0.0129868	0.00418551	0.00995192	0.0250224	0.20009	0.0525754	0.0458761	0.00316881	0.0217899
0.00230261	0.81338	0.0328507	0.0138579	0.00415324	0.00293759	0.0161795	0.0746528	0.00663076	0.0224438	0.00164197	0.0089686
0.00268815	0.783575	0.0126824	0.101566	0.00332969	0.00221293	0.038171	0.0256557	0.00865625	0.0081051	0.00210723	0.01125
0.00267685	0.825169	0.0488224	0.0118429	0.00334911	0.00162255	0.00726668	0.0490547	0.0205648	0.0124632	0.0010929	0.0160749
0.002642	0.8013	0.0236861	0.00715072	0.00890993	0.00193473	0.0156996	0.0713984	0.0109927	0.0309329	0.0015665	0.0237861
0.00394465	0.723291	0.0169725	0.0940505	0.0151823	0.00216436	0.100992	0.0124902	0.00794141	0.00482107	0.00215088	0.0159997
0.00284966	0.808444	0.0232864	0.0277411	0.00409308	0.00123092	0.00750247	0.0409212	0.0154676	0.0106324	0.00238099	0.0554501
0.00144482	0.377341	0.441644	0.0134479	0.00557358	0.00670172	0.00517314	0.093278	0.0322855	0.0125431	0.00155261	0.00901461
0.00274127	0.785295	0.0141491	0.0269255	0.0119484	0.00329183	0.0904419	0.0372994	0.00440103	0.0133156	0.00188954	0.00830153
0.0029119	0.835297	0.0252937	0.0606572	0.00440437	0.000890304	0.0177826	0.020395	0.0055727	0.00775316	0.00207365	0.016968
0.00281685	0.819857	0.0523077	0.0144195	0.00506063	0.000979523	0.00595256	0.0605973	0.00886589	0.00754079	0.00130672	0.0202955
0.0452649	0.355576	0.0249591	0.0361173	0.0049992	0.0167583	0.0273585	0.144013	0.0513678	0.0771281	0.11541	0.101048
0.00259197	0.752368	0.0697063	0.0187733	0.00575368	0.00234497	0.0221497	0.082313	0.0115502	0.0207553	0.00193353	0.00975972
0.00213806	0.819861	0.0720383	0.00787297	0.00578155	0.000178491	0.00693978	0.0618771	0.00862343	0.00848866	0.000738162	0.00546199
0.0030745	0.459271	0.00745593	0.39347	0.0044872	0.0088742	0.0296251	0.0540398	0.0104932	0.00942848	0.00274886	0.0170319
0.00466376	0.672895	0.0214708	0.0130769	0.0116818	0.00230046	0.0281271	0.110422	0.0444824	0.0272488	0.00363137	0.0599992
0.00296261	0.66584	0.0787996	0.0504994	0.00705723	0.00170794	0.00708816	0.0992262	0.0268366	0.0106368	0.00155397	0.0477915
0.00274782	0.808326	0.0236292	0.0130261	0.00364115	0.00242699	0.00903212	0.0301537	0.0182068	0.0136899	0.00282764	0.0722923
0.00217762	0.564582	0.155221	0.00239596	0.0108821	0.00323273	0.040185	0.105984	0.0222388	0.038991	0.00216638	0.0519428
0.00587568	0.679461	0.0248028	0.00868321	0.00424931	0.00280597	0.0284095	0.175946	0.018527	0.0345338	0.000978745	0.0157278
0.00409683	0.40923	0.00561195	0.2906	0.00772853	0.0133866	0.184737	0.0539841	0.00637127	0.0102081	0.00250207	0.0115435
0.00263533	0.74598	0.0263515	0.0143982	0.00428799	0.00239482	0.0367626	0.104325	0.013272	0.0303858	0.00179521	0.0174115
0.00284234	0.744827	0.0141741	0.056967	0.0577293	0.00214334	0.0620357	0.0221355	0.00820397	0.0106439	0.00244449	0.0158533
0.00258915	0.850301	0.0358834	0.0219111	0.00404458	0.00145244	0.0111329	0.0448894	0.00876681	0.00910121	0.00102831	0.00890025
0.00453651	0.361915	0.0222395	0.156749	0.0602155	0.00247626	0.36212	0.016227	0.00247071	0.00367356	0.00226322	0.005114
0.00286825	0.835916	0.02096	0.0817142	0.00366788	0.00115762	0.0169649	0.0123671	0.00553109	0.00772297	0.00208484	0.00904521
0.00284051	0.553413	0.00855429	0.268357	0.00321103	0.0170031	0.0462876	0.0579363	0.00863124	0.0124479	0.00233897	0.0189792
0.00447261	0.394314	0.0105515	0.18279	0.0245376	0.00440843	0.310413	0.0480406	0.00559267	0.00729605	0.00281802	0.00476546
0.0420347	0.416551	0.0398297	0.065935	0.0113356	0.00894671	0.0241396	0.0456829	0.0920089	0.0699819	0.161699	0.0218552
0.00249374	0.741988	0.0232833	0.137235	0.00318029	0.0028046	0.0353539	0.0264205	0.00860828	0.0075031	0.0027494	0.00838031
0.00194108	0.65695	0.0661379	0.0711034	0.089758	0.00240753	0.0344777	0.0398078	0.0112605	0.0128639	0.00367744	0.00961516
0.00265585	0.553527	0.0597675	0.037464	0.0175089	0.00502671	0.017697	0.0593031	0.0444692	0.0206303	0.00428082	0.177669
0.003081	0.795287	0.0271226	0.0268718	0.00639642	0.00189911	0.0291257	0.0423195	0.0114475	0.0309319	0.00243045	0.0230869
0.00254895	0.846087	0.0242671	0.00831078	0.00434537	0.00227001	0.0125139	0.0457607	0.0101072	0.0219325	0.00192506	0.0199316
0.00267608	0.872264	0.0135717	0.0358227	0.00384917	0.00200762	0.0105446	0.0237946	0.0122036	0.00936393	0.00162536	0.0122765
0.00267114	0.715526	0.0994146	0.00813521	0.00364724	0.000613743	0.00573199	0.0767468	0.0227441	0.0103108	0.00208351	0.0523746
0.00942231	0.482409	0.0732034	0.0219857	0.00836754	0.00526152	0.0109614	0.0945165	0.0893121	0.025698	0.0616646	0.117198
0.00288776	0.759632	0.0107112	0.120888	0.0105777	0.00215399	0.0347506	0.0232965	0.0090229	0.00708282	0.00230928	0.0166865
0.00294447	0.782227	0.0270102	0.0561224	0.00339479	0.00189521	0.0126797	0.031339	0.0206631	0.0104444	0.00249375	0.0487865
0.00425235	0.550885	0.00560314	0.218297	0.0106135	0.0058599	0.125382	0.0545408	0.00584001	0.0085826	0.00210404	0.00803913
0.00271326	0.841728	0.0147931	0.0298395	0.00456698	0.00363121	0.0133197	0.0549966	0.00931353	0.0110128	0.00206365	0.0120214
0.00279495	0.762997	0.0256992	0.00644626	0.00895405	0.00159261	0.0209779	0.0685812	0.0121159	0.0562435	0.00192515	0.0316724
0.00287455	0.802107	0.0224489	0.0531296	0.00556817	0.00175394	0.0210418	0.0555344	0.0117889	0.0100324	0.00251983	0.0112003
0.00275395	0.864239	0.0212273	0.00756772	0.00557661	0.00154206	0.0113178	0.0366331	0.00869148	0.0142828	0.00175964	0.024408
0.00291583	0.734395	0.0214617	0.0338667	0.00440501	0.00304405	0.00679528	0.0807228	0.0266514	0.0163751	0.00282673	0.0665408
0.00312234	0.70322	0.0110401	0.0217866	0.0283451	0.0062557	0.058098	0.110591	0.0112269	0.0308497	0.00253534	0.0129296
0.00287597	0.875808	0.0240857	0.0313261	0.00361298	0.00128173	0.0084546	0.0178946	0.00541525	0.00820331	0.00185126	0.0191909
0.00293012	0.87223	0.0134956	0.0400664	0.00479751	0.00202936	0.01783	0.0192984	0.0068449	0.00862771	0.00199735	0.00985224
0.00279818	0.812652	0.0176421	0.07303	0.00435004	0.00140764	0.0455522	0.0137917	0.00741205	0.0100426	0.00204096	0.00928085
0.00251324	0.67646	0.0174117	0.0373045	0.00571816	0.0444033	0.0303503	0.155878	0.0054311	0.0154471	0.00209766	0.00698482
0.00298625	0.838204	0.0331763	0.0182661	0.00404693	0.000723771	0.00711536	0.0310245	0.011066	0.0103106	0.00176333	0.0413168
0.00296931	0.82131	0.0158425	0.0522367	0.00607148	0.00156245	0.056014	0.0159198	0.0064919	0.00789296	0.00204272	0.0116464
0.0031524	0.660644	0.0610241	0.019044	0.00521595	0.00520174	0.062417	0.107392	0.0124337	0.0530127	0.0026037	0.00785935
0.0019172	0.634559	0.216194	0.043392	0.00512738	0.00563542	0.0101684	0.0544695	0.00845637	0.0103041	0.00130665	0.00846941
0.00292482	0.800536	0.0153689	0.10058	0.00330931	0.00187134	0.0348162	0.0141296	0.00572952	0.00782729	0.00196091	0.0109455
0.0203475	0.21461	0.0173723	0.034699	0.0111139	0.0896793	0.0623965	0.297001	0.0714586	0.116577	0.0112877	0.053457
0.00277143	0.819517	0.0190399	0.0820812	0.00465651	0.00162697	0.0333321	0.0139015	0.00485229	0.00747254	0.00206199	0.00868635
0.00550004	0.512738	0.00705783	0.21426	0.0181272	0.00271526	0.190011	0.0272684	0.00529914	0.00553095	0.0019204	0.0095713
0.00291775	0.5512	0.00849118	0.264922	0.030645	0.00381902	0.0853739	0.0310637	0.00527552	0.00769112	0.00204592	0.00655548
0.00290519	0.832858	0.0161634	0.0345754	0.00687982	0.00182578	0.0651894	0.0151018	0.00527054	0.0090202	0.00201296	0.00819728
0.00298079	0.861888	0.0292484	0.010812	0.00466321	0.000723622	0.00746393	0.0452715	0.005854	0.00944194	0.00168997	0.0199624
0.00284776	0.860792	0.0256142	0.00887562	0.00410093	0.00151738	0.00827728	0.0366335	0.010479	0.00969328	0.00169	0.0294787
0.00351501	0.618474	0.0172095	0.0575092	0.0131958	0.00670646	0.0714185	0.0762187	0.0231709	0.0602206	0.00270447	0.0496573
0.00285775	0.871645	0.0238344	0.0156558	0.00692342	0.00119441	0.00951729	0.0335218	0.0076954	0.010128	0.00184469	0.0151824
0.00872612	0.236837	0.00702752	0.0192096	0.0102316	0.0316176	0.0578075	0.174438	0.0508928	0.342337	0.00527819	0.0555973
0.00275348	0.788427	0.0157958	0.0752787	0.0271155	0.00292937	0.019185	0.0212666	0.0105332	0.00863323	0.0024683	0.025614
0.00277253	0.807684	0.0127921	0.0645427	0.00439955	0.00267204	0.0392359	0.0184123	0.0126643	0.0101928	0.00188472	0.0227474
0.00366355	0.451575	0.0105044	0.18445	0.0333141	0.0599149	0.164928	0.0631851	0.00677972	0.0121655	0.0039742	0.00554624
0.00275813	0.768041	0.0142935	0.13796	0.00324975	0.00170199	0.0138582	0.027609	0.00653374	0.00805921	0.00176662	0.0141682
0.0029509	0.875618	0.0192078	0.0287362	0.00410825	0.00162596	0.0107218	0.0266706	0.00515212	0.00902095	0.00175034	0.0144375
0.00264006	0.807191	0.0163608	0.0415176	0.00380156	0.00374285	0.023709	0.0663337	0.0128398	0.011789	0.00271542	0.00735883
0.00284152	0.851987	0.0139667	0.0535299	0.00370059	0.00173548	0.0161365	0.0222687	0.00872854	0.00889837	0.00189152	0.0143148
0.00168395	0.299254	0.148352	0.0735503	0.0151221	0.0435188	0.0555789	0.0859938	0.0724218	0.0623237	0.0167443	0.125457
0.00495135	0.53016	0.0828074	0.199675	0.0178835	0.0211538	0.0071206	0.103502	0.00897507	0.0141803	0.000901191	0.00869018
0.0433611	0.5682	0.0170172	0.0413696	0.00662311	0.0673895	0.0410073	0.0746142	0.00639898	0.120024	0.00319678	0.0107979
0.00291834	0.686225	0.0240659	0.0382521	0.00718689	0.00378048	0.0302433	0.103329	0.0130102	0.0652236	0.00169629	0.0240689
0.00306819	0.806158	0.0144389	0.104767	0.00596116	0.0018702	0.0160294	0.012294	0.00731016	0.00931981	0.00168414	0.0170991
0.00357224	0.766835	0.0202486	0.0411287	0.0129597	0.00659084	0.0293584	0.0687001	0.00978488	0.0240397	0.00250559	0.0142759
0.00286602	0.755637	0.0112706	0.0768157	0.0136215	0.0021796	0.0985238	0.0156278	0.00750632	0.00670437	0.00195994	0.00728697
0.00283994	0.793551	0.0194271	0.0110986	0.00439518	0.00140775	0.0190401	0.0794803	0.0142826	0.0155541	0.00190796	0.0370158
0.00316865	0.86777	0.0195112	0.019213	0.00380612	0.00268081	0.00810122	0.0337157	0.0114132	0.0102215	0.00159993	0.018799
0.00256694	0.770714	0.0466374	0.0177581	0.00509501	0.00335586	0.00791523	0.0671777	0.0182679	0.0112425	0.00205036	0.0472189
0.00245456	0.680042	0.00861837	0.188338	0.00369117	0.00689707	0.0173328	0.0534356	0.0110754	0.0116478	0.00186547	0.0146017
0.00276822	0.797939	0.0144396	0.0517126	0.00814276	0.00280802	0.060641	0.03636	0.00616678	0.00904679	0.00214279	0.00783243
0.00870963	0.549094	0.051647	0.032306	0.00589387	0.0294526	0.0145473	0.169208	0.0468831	0.0417562	0.0105114	0.0399907
0.0188723	0.451225	0.0221023	0.0733264	0.00723093	0.0192073	0.0347152	0.13794	0.088645	0.0436158	0.0195635	0.0835554
0.00315485	0.721334	0.0122253	0.124369	0.0148818	0.00179847	0.0888945	0.0114874	0.0063281	0.00623249	0.00222706	0.00706694
0.00272836	0.841278	0.0433564	0.0144792	0.00412502	0.00207674	0.0073731	0.033154	0.0142912	0.0129223	0.00200225	0.0222139
0.00244696	0.478172	0.064595	0.0203628	0.0140605	0.0842505	0.0314484	0.256339	0.0150886	0.024409	0.00153454	0.00729223
0.00175653	0.548468	0.132263	0.10057	0.00665073	0.00220108	0.116641	0.0489319	0.00959908	0.0187125	0.00318543	0.0110211
0.00458307	0.455506	0.00793939	0.167027	0.0369189	0.0263785	0.0782833	0.0427704	0.0240517	0.124389	0.00641625	0.0257366
0.00283984	0.774796	0.00982631	0.0557149	0.021142	0.0021734	0.0733158	0.0167387	0.00888285	0.00986085	0.00250641	0.0222028
0.00276733	0.843352	0.0130547	0.0580799	0.00464612	0.00287966	0.00956433	0.0234618	0.0103135	0.00950263	0.00173465	0.0206439
0.00265744	0.540804	0.183834	0.0610664	0.00226199	0.00298642	0.0568919	0.101085	0.00864418	0.0259163	0.00286973	0.0109831
0.00449071	0.592021	0.0921389	0.00972086	0.0381546	0.00528689	0.0715987	0.14429	0.0167746	0.0137996	0.00293969	0.00878438
0.00380328	0.342471	0.00584701	0.103349	0.0955195	0.00398688	0.395747	0.0325198	0.00356734	0.00608958	0.00243934	0.00466003
0.0028797	0.775101	0.110539	0.056533	0.00352259	0.000893516	0.00702818	0.0201371	0.00405408	0.00814227	0.00164599	0.00952383
0.002715	0.788268	0.0197585	0.0498879	0.0146035	0.00160492	0.0649318	0.0235669	0.00649862	0.0142613	0.00202635	0.0118776
0.00219924	0.0475501	0.0341701	0.119966	0.140831	0.202733	0.133991	0.235966	0.00916264	0.012963	0.00601392	0.0544529
0.00264736	0.826176	0.0438162	0.0163676	0.00477123	0.00126385	0.0110022	0.0375632	0.00603277	0.0297342	0.00179806	0.0188275
0.00431652	0.57466	0.00477156	0.184808	0.00805996	0.00344807	0.141349	0.0198338	0.0159363	0.00771967	0.00249577	0.0326009
0.00294435	0.881017	0.0258894	0.0139224	0.00473246	0.00087257	0.0078966	0.0320441	0.00550534	0.0090598	0.0017781	0.014338
0.00272377	0.791433	0.0157077	0.0763559	0.0200901	0.00245821	0.032854	0.0309421	0.00803155	0.0083556	0.00257554	0.00847239
0.00273403	0.869101	0.0189282	0.0147071	0.00761095	0.00153184	0.0252674	0.0269812	0.00596345	0.0130757	0.001934	0.012165
0.0116864	0.559074	0.0150165	0.0913179	0.0489978	0.00891685	0.132724	0.0356184	0.00971212	0.0491096	0.0039651	0.033861
0.00299037	0.797461	0.0175823	0.10736	0.00435674	0.00163693	0.0242672	0.0100618	0.0091307	0.0087021	0.00211932	0.0143319
0.00332584	0.728719	0.0137965	0.122034	0.00508921	0.0020478	0.029547	0.0619435	0.00976472	0.00891826	0.00231215	0.0125015
0.0044466	0.577124	0.00698426	0.142986	0.0174639	0.00327951	0.183584	0.0357615	0.00485804	0.011424	0.00214087	0.00994745
0.00302687	0.858873	0.0262822	0.0221484	0.00701388	0.00128891	0.0416161	0.0149855	0.00490011	0.00873586	0.00212088	0.00900829
0.00262334	0.888039	0.020355	0.0131668	0.00434721	0.00174558	0.00969879	0.0252694	0.00666153	0.0140152	0.00190276	0.0121753
0.0027812	0.829953	0.0217137	0.0728081	0.00338604	0.0014354	0.030041	0.0103005	0.00472772	0.00704982	0.00198847	0.0138149
0.00285203	0.869369	0.0161462	0.0332264	0.00453017	0.00197052	0.0175099	0.0240466	0.00590033	0.00896794	0.00197236	0.0135085
0.00284346	0.875643	0.0307534	0.0125694	0.00496073	0.00103072	0.00750529	0.0321376	0.00614349	0.00928422	0.00139681	0.0157319
0.0027544	0.793447	0.0122003	0.0771392	0.0107577	0.00420096	0.0402871	0.0273471	0.00881648	0.0095207	0.00242028	0.0111088
0.00284777	0.77845	0.0156028	0.126607	0.00306913	0.00150074	0.0236047	0.0128476	0.00707918	0.00705949	0.00192868	0.0194031
0.0021426	0.696189	0.0552562	0.0447226	0.026086	0.00130342	0.0837249	0.0662863	0.00581154	0.0115782	0.00189342	0.00500541
0.0028719	0.837931	0.018963	0.0524412	0.00442112	0.0018042	0.0132523	0.0359208	0.00725502	0.008929	0.00194236	0.0142685
0.00266013	0.850676	0.030445	0.0144025	0.00475513	0.00121408	0.0110291	0.0492384	0.0102792	0.0103358	0.00166478	0.0133001
0.00240755	0.72976	0.1087	0.0355305	0.0357892	0.00214403	0.0273581	0.0296777	0.00789011	0.00891524	0.00175992	0.0100674
0.0224266	0.354941	0.0594218	0.00781714	0.153143	0.0551992	0.0525919	0.127576	0.0116479	0.11112	0.00506754	0.0390472
0.00454267	0.525113	0.00532395	0.110475	0.00473305	0.0178787	0.158007	0.106387	0.0110481	0.0369282	0.00350428	0.016059
0.0024136	0.742502	0.0781517	0.016178	0.00396309	0.00286366	0.00746611	0.0836069	0.0241303	0.0159023	0.00172943	0.0210929
0.00280538	0.797097	0.0896408	0.00689256	0.0041403	0.000390335	0.00587556	0.0584433	0.0114691	0.00944333	0.00113759	0.0126649
0.00250414	0.764448	0.0194779	0.140068	0.00272888	0.00244656	0.0144758	0.0279469	0.00612651	0.00915532	0.00182921	0.00879207
0.00235408	0.516749	0.00955643	0.133665	0.0150083	0.123789	0.0586032	0.111121	0.00552869	0.00748879	0.00135091	0.0147852
0.00279219	0.827306	0.0375039	0.0140585	0.00383346	0.00181974	0.0091665	0.0383189	0.0241322	0.0114702	0.0034302	0.0261686
0.00270694	0.792445	0.0191857	0.0416111	0.0117521	0.00330183	0.0298883	0.0574319	0.00731885	0.0170226	0.00191478	0.0154209
0.00402188	0.761941	0.0224097	0.0847771	0.0107152	0.00159959	0.0793694	0.0116405	0.00535227	0.00754477	0.00214056	0.00848786
0.00360742	0.811462	0.0200708	0.0733377	0.00487726	0.00190949	0.0375937	0.0210546	0.00556866	0.00773742	0.00200942	0.0107719
0.0029275	0.863515	0.0343234	0.0105435	0.00459691	0.000769164	0.00746869	0.0317249	0.010675	0.00881503	0.00176787	0.0228728
0.00278869	0.846547	0.017289	0.0615034	0.00366741	0.00172059	0.0200663	0.0148611	0.00642427	0.0106844	0.00156114	0.0128862
0.00277754	0.885638	0.0296584	0.0114247	0.00432187	0.00142564	0.00805157	0.0245091	0.0069314	0.00938552	0.0015599	0.0143162
0.00284619	0.707139	0.0799497	0.00823785	0.00360899	0.00188644	0.00683246	0.079016	0.0432901	0.0114836	0.00111936	0.0545907
0.00275962	0.65789	0.115005	0.00749578	0.0036829	0.000921972	0.00575235	0.0775269	0.0419857	0.0144978	0.00335547	0.0691267
0.00298406	0.856524	0.0374372	0.0306533	0.00351608	0.000751158	0.00705977	0.0267282	0.0103262	0.00828311	0.00158266	0.0141542
0.0035452	0.468651	0.0507993	0.00842818	0.00575121	0.00312591	0.0103072	0.0787529	0.0844985	0.0531323	0.00510572	0.227903
0.0026591	0.832392	0.0303029	0.0107237	0.00392295	0.001238	0.00860835	0.0446008	0.0121169	0.0128834	0.00191673	0.0386356
0.00223066	0.645359	0.0332377	0.0243157	0.00762859	0.00181177	0.0226257	0.140831	0.0359116	0.0647217	0.00147215	0.0198541
0.00275863	0.845387	0.0393157	0.0123224	0.00371639	0.00112959	0.00918734	0.0555165	0.0104959	0.00950378	0.00127156	0.00939481
0.00280811	0.858216	0.0247171	0.0150067	0.00568402	0.00196938	0.00993779	0.0351327	0.0125406	0.0112188	0.00187565	0.020893
0.238137	0.328923	0.0265986	0.0636713	0.00590047	0.00567099	0.0212142	0.0817451	0.0967191	0.0805496	0.00963812	0.041233
0.00276766	0.837716	0.0255516	0.0239419	0.00941649	0.0012082	0.0344281	0.0393858	0.00641158	0.00878438	0.00191178	0.00847641
0.00284413	0.78324	0.011694	0.116382	0.00388047	0.00176246	0.0311876	0.0173647	0.00544564	0.00736362	0.00203834	0.016797
0.00426213	0.734315	0.0372046	0.0260016	0.00527287	0.00241772	0.0633739	0.0920719	0.0109339	0.0128773	0.00285592	0.00841345
0.00240964	0.640428	0.0110834	0.235591	0.00637453	0.00331348	0.0277061	0.0362815	0.0138643	0.0117046	0.00229458	0.00894899
0.00314807	0.527981	0.126694	0.126679	0.0287368	0.00116444	0.115927	0.0220461	0.0037138	0.0164352	0.0139851	0.0134891
0.00529864	0.420392	0.0216624	0.0739029	0.0260345	0.00780673	0.34098	0.0351774	0.00611197	0.0311007	0.0239328	0.00760007
0.00488084	0.278239	0.0144956	0.156953	0.0648084	0.0341766	0.288591	0.0755477	0.00460532	0.0303744	0.0115753	0.0357522
0.00349364	0.327136	0.0030153	0.184356	0.0523185	0.0170635	0.340588	0.04839	0.00448921	0.00829296	0.00262422	0.00823297
0.00189021	0.711959	0.0153135	0.161713	0.0176461	0.00214709	0.0453722	0.0221629	0.00616258	0.00675762	0.00194491	0.00693078
0.00285178	0.845241	0.0273003	0.0596311	0.00380805	0.00133823	0.00666407	0.0253162	0.00843417	0.00802919	0.00118905	0.0101966
0.00259138	0.847444	0.0148385	0.0260513	0.00654358	0.00477555	0.0140169	0.0388792	0.0105464	0.0145016	0.00215003	0.0176612
0.00450886	0.683514	0.0248555	0.129596	0.0244759	0.00097618	0.066853	0.00868828	0.00863904	0.009386	0.0019349	0.0365715
0.0301787	0.255329	0.0213722	0.026274	0.0175887	0.0154494	0.315116	0.12437	0.00895315	0.0846712	0.0947365	0.00596156
0.00533827	0.569314	0.0119899	0.0164477	0.00596343	0.00381609	0.0525075	0.139125	0.0378775	0.0867327	0.00283159	0.0680559
0.0026429	0.855647	0.0163727	0.0317194	0.00555676	0.00233704	0.0264789	0.0215848	0.00581366	0.011976	0.00196826	0.0179021
0.00278843	0.782019	0.0185331	0.0197204	0.00502047	0.00453655	0.0601489	0.0825348	0.00529089	0.00925809	0.00199621	0.00815267
0.0024915	0.745677	0.0138267	0.119254	0.00511139	0.00275303	0.0103442	0.0138295	0.0147505	0.014205	0.00244636	0.0553111
0.00309469	0.629854	0.180551	0.115576	0.00330003	0.0023612	0.0118549	0.0120744	0.0168837	0.00684265	0.00388454	0.0137228
0.00297966	0.857383	0.0298608	0.01599	0.00657437	0.00137562	0.0118805	0.0350421	0.00792939	0.0100391	0.0023847	0.0185603
0.00256361	0.439231	0.0092186	0.019797	0.153548	0.00352511	0.226977	0.0592433	0.0056045	0.067793	0.00185656	0.0106417
0.00264714	0.681768	0.136648	0.0763497	0.0044558	0.000929356	0.0338407	0.0425317	0.00372294	0.00753416	0.00118032	0.00839203
0.00264193	0.849555	0.0161838	0.0521381	0.00633712	0.00212738	0.0217475	0.0198774	0.00660515	0.0104521	0.00174062	0.0105941
0.00311205	0.783657	0.0136979	0.0531356	0.00836678	0.00227029	0.0801993	0.0249428	0.00886372	0.0129052	0.00162859	0.00722072
0.00321161	0.731123	0.0385222	0.0528239	0.00469857	0.00154548	0.0903319	0.0499179	0.00868914	0.00986175	0.00169199	0.00758216
0.00342765	0.426738	0.0119786	0.127834	0.0368956	0.00380807	0.328387	0.0442526	0.00344054	0.0054911	0.00228018	0.00546566
0.00303126	0.801504	0.0190613	0.0594019	0.00940906	0.00124671	0.0485603	0.0235471	0.00514721	0.00748479	0.00194056	0.0196655
0.00298287	0.719926	0.018599	0.0209362	0.00378301	0.00335766	0.0742744	0.0592488	0.0172265	0.0530834	0.0147164	0.0118655
0.0026492	0.822767	0.0351113	0.0340136	0.00365114	0.00181478	0.0416524	0.0360072	0.00537073	0.00873687	0.00176605	0.00646001
0.00315364	0.409289	0.0162584	0.232008	0.0465111	0.133758	0.0666474	0.0793614	0.00342665	0.00581884	0.00151078	0.00225736
0.00335586	0.792831	0.0182024	0.0600882	0.00525327	0.00180549	0.0584261	0.0342131	0.00562456	0.00755746	0.00188749	0.0107551
0.00255239	0.576953	0.00608802	0.237243	0.00371783	0.0224284	0.0339641	0.0779482	0.00865497	0.0151447	0.00188471	0.0134209
0.00276825	0.866967	0.0219111	0.0322954	0.00544916	0.00152283	0.00921813	0.0284354	0.00716693	0.00945307	0.00177871	0.0130343
0.00157394	0.343172	0.0393721	0.171825	0.047612	0.063062	0.119782	0.0123366	0.00518103	0.183051	0.00330245	0.00973051
0.0030066	0.820794	0.0258314	0.0317159	0.00362684	0.00170961	0.0108333	0.0425373	0.0128368	0.0104706	0.00197282	0.0346647
0.00254876	0.648325	0.0914633	0.00861927	0.00441291	0.00194981	0.00658031	0.089935	0.0521536	0.0202168	0.00266233	0.0711329
0.00297523	0.824569	0.0245356	0.00895581	0.00488576	0.00122154	0.00941551	0.0746317	0.00886484	0.0138777	0.0017875	0.0242794
0.00259379	0.83196	0.0370291	0.0078105	0.00429833	0.00230224	0.0140276	0.0586146	0.0145292	0.0141922	0.00268776	0.00995504
0.00279237	0.773679	0.026953	0.0134434	0.0122449	0.00252383	0.0642112	0.0476649	0.00691152	0.0288302	0.00282075	0.0179246
0.00872848	0.64593	0.0178282	0.0380067	0.00729232	0.00117966	0.00663973	0.0262021	0.0201882	0.0109795	0.0137002	0.203325
0.00260962	0.783928	0.0181577	0.0395655	0.00586353	0.00564617	0.0293644	0.0696192	0.010223	0.0119265	0.00236022	0.0207366
0.00301987	0.835264	0.052168	0.02361	0.00424021	0.000627725	0.00763098	0.0392307	0.0101174	0.00982677	0.00131648	0.0129483
0.00241698	0.764586	0.101368	0.013329	0.0050356	0.00120242	0.0118924	0.0553799	0.0169324	0.0147196	0.00126338	0.011874
0.00317302	0.831863	0.0152549	0.026731	0.00863062	0.00267269	0.0262958	0.0560528	0.00616607	0.0104023	0.00200896	0.0107492
0.00205611	0.809713	0.0161811	0.034064	0.00382769	0.00229457	0.0266328	0.0425389	0.00838546	0.037351	0.00198804	0.0149677
0.00312579	0.271198	0.0427901	0.11526	0.0202207	0.10121	0.279552	0.076207	0.00327261	0.081426	0.00383967	0.00189869
0.00256465	0.725138	0.122789	0.00513468	0.00590652	0.000677494	0.0203154	0.100547	0.00348463	0.00996632	0.000886839	0.00258952
0.00293265	0.887848	0.0193685	0.0164595	0.00446819	0.00154068	0.0115771	0.0272328	0.00622181	0.0091642	0.00193263	0.0112543
0.00189627	0.603355	0.161292	0.00818487	0.00423973	0.0042263	0.00575522	0.0698345	0.0634975	0.0212169	0.00430333	0.0521989
0.00289141	0.857691	0.0289315	0.0204323	0.00357859	0.00124069	0.0219195	0.0262842	0.00476375	0.00991481	0.00189917	0.0204532
0.00288506	0.901649	0.0176316	0.0176733	0.00410484	0.00151649	0.0114275	0.0167851	0.00569178	0.00910609	0.00176014	0.00976956
0.00282385	0.763854	0.0126189	0.0643275	0.0148	0.00254223	0.0938943	0.0214508	0.0062439	0.00804707	0.00208946	0.00730769
0.00330191	0.680068	0.0163908	0.115517	0.0498757	0.00183097	0.099935	0.00875449	0.00529322	0.00651201	0.00198954	0.0105308
0.0023765	0.8194	0.0788634	0.0453755	0.00314008	0.00109509	0.00825163	0.0205367	0.00559984	0.00972547	0.00153025	0.0041057
0.00289837	0.790706	0.0327889	0.00873305	0.00397181	0.000883038	0.00832772	0.0898619	0.0161399	0.0146046	0.00139773	0.0296869
0.0046492	0.370777	0.00128415	0.0529718	0.0248562	0.0322787	0.329343	0.104047	0.00440468	0.0626741	0.00264095	0.0100727
0.00294385	0.808762	0.0210585	0.00935674	0.0355934	0.00115347	0.0292463	0.0395753	0.00663806	0.0206907	0.00210823	0.0228731
0.00303046	0.724614	0.0108716	0.0260966	0.0330858	0.00327329	0.0632809	0.077457	0.011729	0.0290146	0.00216144	0.0153852
0.00469699	0.595201	0.00756614	0.130062	0.014717	0.00535067	0.110617	0.0848912	0.00959867	0.0179912	0.00216212	0.0171465
0.00691271	0.675579	0.0162409	0.0773543	0.0050673	0.0019175	0.0586554	0.0956527	0.0160403	0.0315193	0.00348728	0.0115732
0.00257829	0.785328	0.032292	0.0372268	0.0172656	0.00175438	0.021068	0.0687908	0.00640846	0.0110102	0.00155204	0.0147255
0.0024746	0.787986	0.0836725	0.0438367	0.00381785	0.00096315	0.00841428	0.0333903	0.0154049	0.00795706	0.000993671	0.011089
0.0030499	0.823958	0.0164893	0.0351775	0.00764209	0.00125645	0.0176649	0.0276634	0.0069799	0.0102178	0.00218494	0.0477156
0.00296142	0.840201	0.0174887	0.040573	0.00355081	0.00175761	0.0192471	0.0170986	0.00748834	0.0101294	0.00229298	0.0372107
0.00565655	0.331827	0.0161363	0.103676	0.0238745	0.0278433	0.230347	0.10945	0.00656717	0.0722811	0.0629123	0.00942905
0.00274665	0.86224	0.0183292	0.0315329	0.00559861	0.00144605	0.0250661	0.0221601	0.00781251	0.00884608	0.00173091	0.0124911
0.00271993	0.818797	0.0222157	0.0223038	0.00475292	0.00158998	0.0207717	0.0436382	0.0116357	0.0118442	0.00215256	0.0375788
0.00285397	0.869724	0.0185211	0.0200508	0.00397507	0.00159191	0.0116819	0.0354911	0.00904636	0.0101089	0.00171315	0.0152413
0.00250712	0.858154	0.0226748	0.0366696	0.00463746	0.00296939	0.018138	0.0268508	0.0084538	0.00839629	0.00220257	0.00834623
0.00293521	0.706713	0.039552	0.0152335	0.00312337	0.00219545	0.0200028	0.110787	0.014498	0.0539017	0.00226737	0.0287906
0.00282041	0.874864	0.0249062	0.0324522	0.00484752	0.00135098	0.00744137	0.0238846	0.00863235	0.00886282	0.00151076	0.00842646
0.00197785	0.604534	0.0457924	0.0166414	0.00828151	0.00515451	0.0169238	0.0437655	0.115991	0.00898027	0.112078	0.0198801
0.00297642	0.81521	0.0130066	0.0883513	0.00508928	0.0021098	0.0196255	0.0162449	0.0114576	0.00983304	0.00150317	0.0145926
0.00257047	0.850675	0.0598817	0.0284563	0.00335402	0.000805869	0.0062579	0.0198973	0.0057678	0.00841098	0.000965957	0.0129563
0.00268942	0.865317	0.0174172	0.0301166	0.00885727	0.00247386	0.0143305	0.0258332	0.00980391	0.00954143	0.00206072	0.0115586
0.00249244	0.831923	0.0180629	0.0271348	0.018592	0.00207913	0.0218802	0.0379398	0.00791593	0.0186058	0.00216542	0.0112084
0.00259686	0.85366	0.0142592	0.016916	0.00670206	0.00216924	0.0200586	0.0279364	0.00895141	0.0158032	0.00167773	0.0292691
0.00280242	0.804231	0.0234594	0.0684216	0.00385694	0.00573851	0.0117215	0.0204456	0.00877159	0.00907137	0.00229018	0.0391893
0.00363483	0.597047	0.0475532	0.0849923	0.00378348	0.00237239	0.0252944	0.171219	0.0225725	0.0219366	0.00290594	0.0166878
0.0406096	0.161688	0.0173993	0.0192681	0.0254366	0.0572063	0.0887571	0.317832	0.064331	0.189617	0.0067947	0.0110604
0.00270368	0.806805	0.0285505	0.0495825	0.00362523	0.00153692	0.00717503	0.029609	0.0217208	0.0101266	0.0022414	0.0363231
0.00266007	0.827444	0.0179591	0.0307336	0.0177449	0.00326782	0.0142385	0.0310041	0.013139	0.0104745	0.0020214	0.0293135
0.00277437	0.749008	0.0576366	0.00579116	0.0044007	0.00102459	0.00775394	0.0958238	0.0218599	0.0224859	0.00138261	0.0300581
0.00288053	0.81939	0.0348445	0.0828603	0.00388493	0.00113483	0.0110626	0.0185269	0.00478481	0.007413	0.00168995	0.0115273
0.0028547	0.844502	0.0281612	0.0132757	0.00552051	0.00200605	0.00852193	0.0500907	0.0152701	0.0114326	0.00173641	0.0166277
0.00289519	0.870509	0.0187046	0.0388876	0.00366952	0.00139487	0.00949554	0.0263519	0.00750177	0.00928634	0.00161934	0.00968391
0.0025089	0.755667	0.0219985	0.105926	0.0179341	0.00373287	0.0214004	0.0174045	0.0160461	0.0104105	0.00300314	0.0239683
0.165023	0.559898	0.00809458	0.0640979	0.0303846	0.00329393	0.0402217	0.0290265	0.0139196	0.00858257	0.06499	0.0124676
0.0030014	0.834871	0.0271336	0.0508794	0.010749	0.00194133	0.0139088	0.0317935	0.00588985	0.00900714	0.00186268	0.00896255
0.0041504	0.632117	0.102455	0.0181488	0.00543405	0.00220367	0.0113985	0.149984	0.0360635	0.0188998	0.00182245	0.0173221
0.00120808	0.514875	0.202991	0.0151721	0.0212499	0.0035611	0.0976892	0.059191	0.00465672	0.0735654	0.00201935	0.00382027
0.00205438	0.750884	0.0339778	0.0290643	0.00519007	0.0035778	0.0329276	0.0580553	0.00599966	0.0671554	0.00251948	0.00859393
0.00279828	0.71148	0.101246	0.115912	0.00267429	0.00138181	0.0262358	0.0174721	0.0083815	0.00616886	0.00151297	0.00473641
0.00206951	0.636639	0.0963132	0.00701977	0.010451	0.00748478	0.0529433	0.139949	0.00594401	0.0277697	0.001433	0.0119833
0.00385686	0.449636	0.00971682	0.0560669	0.0421547	0.0203069	0.15104	0.111866	0.0264282	0.0814135	0.0274092	0.0201051
0.00300556	0.800746	0.0255013	0.0246963	0.00875731	0.00148947	0.0206323	0.0548145	0.0071432	0.0190136	0.00189465	0.0323055
0.00259157	0.836565	0.0209143	0.0227914	0.0155012	0.00192254	0.0541872	0.0189524	0.0048823	0.0114537	0.00207657	0.00816171
0.0280429	0.691671	0.0347514	0.0228023	0.00315038	0.00403208	0.00854186	0.0355521	0.0727105	0.0205261	0.00566238	0.0725569
0.00250211	0.813094	0.0192241	0.0593075	0.00945297	0.00264579	0.0237734	0.0360437	0.00660172	0.015074	0.00212651	0.0101547
0.00165063	0.667523	0.0526481	0.0535291	0.00269923	0.00803856	0.0217991	0.110801	0.00823039	0.0522929	0.00147769	0.0193108
0.00323694	0.79782	0.0184533	0.0332284	0.00505848	0.00391916	0.0407465	0.0722281	0.00661044	0.00915645	0.00221536	0.00732675
0.00279714	0.885504	0.0289906	0.0253219	0.0033825	0.00166056	0.0106018	0.0149193	0.00850852	0.00835807	0.00173593	0.00821922
0.00292319	0.822408	0.0241323	0.0486827	0.00451365	0.0012728	0.0116589	0.0292929	0.00943976	0.0116312	0.00228678	0.0317573
0.00199937	0.746552	0.149503	0.0339158	0.00176018	0.00112837	0.0216762	0.0222127	0.00578128	0.00914166	0.00194842	0.00438176
0.00266945	0.823415	0.0207512	0.0124046	0.00878187	0.00235267	0.0186484	0.0687163	0.00927015	0.0161815	0.00180094	0.0150077
0.00329667	0.713524	0.0382239	0.0182079	0.0959907	0.00270847	0.0251678	0.0480457	0.0143799	0.0151245	0.00357401	0.0217566
0.00324604	0.665721	0.0282822	0.0630988	0.0213039	0.00853996	0.0299668	0.130718	0.0131982	0.0175205	0.00376565	0.0146389
0.00247777	0.712112	0.0220725	0.0499044	0.0160652	0.0034259	0.00975118	0.0774864	0.00565324	0.0142936	0.00182095	0.0849372
0.00301849	0.858706	0.0186483	0.0468622	0.00520695	0.00137211	0.0106609	0.015754	0.00807244	0.00782214	0.00196811	0.0219088
0.00290996	0.875473	0.0211706	0.0334053	0.00374461	0.00137369	0.00958509	0.0183858	0.00902849	0.00830962	0.001731	0.0148825
0.00287024	0.864366	0.0175063	0.0197721	0.00373514	0.00130955	0.0117898	0.0206304	0.0103788	0.0110903	0.00178572	0.0347661
0.00275539	0.845666	0.0159351	0.0664846	0.00437565	0.00192125	0.0104374	0.0199241	0.00716624	0.00821124	0.00209015	0.0150333
0.0100054	0.386452	0.158158	0.0092721	0.00545929	0.00625257	0.0111658	0.0940624	0.122919	0.0177745	0.136663	0.0418164
0.00271888	0.321033	0.063468	0.0178596	0.199506	0.0140421	0.141473	0.157252	0.0124984	0.0511186	0.00405186	0.0149792
0.00637153	0.263076	0.24611	0.0058599	0.00138448	0.00154071	0.0046944	0.0823655	0.163159	0.0176725	0.0335597	0.174207
0.00293007	0.47317	0.011047	0.238833	0.0617492	0.0213272	0.0720445	0.0485054	0.0141197	0.0351189	0.00449212	0.016663
0.00483446	0.621362	0.0593829	0.0317621	0.00891658	0.00375014	0.0339401	0.126735	0.0288956	0.0165291	0.00156246	0.0623296
0.00211194	0.764018	0.0155417	0.0508368	0.0153691	0.00393587	0.0313068	0.0565351	0.00790169	0.00965462	0.00194945	0.0408386
0.00286645	0.883741	0.0170027	0.0246787	0.00549289	0.00157841	0.00724436	0.0202501	0.0101983	0.00809564	0.0016782	0.0171737
0.00266215	0.853306	0.0308822	0.0125549	0.00487432	0.0017446	0.0145333	0.0502909	0.00971407	0.00949463	0.0020518	0.00789156
0.0113569	0.703511	0.0179983	0.0200517	0.0120667	0.00760979	0.0229977	0.0627201	0.0544197	0.0193128	0.0027602	0.0651949
0.0124558	0.269584	0.0162099	0.0821999	0.00600987	0.0178846	0.025448	0.13529	0.142949	0.0923582	0.0315652	0.168046
0.00249741	0.829784	0.0261856	0.028874	0.00638529	0.00188826	0.0278595	0.0349805	0.0130559	0.00936762	0.00196724	0.0171545
0.0028593	0.849749	0.014264	0.0372161	0.00357741	0.00243659	0.0191354	0.0378346	0.00901413	0.0103866	0.00185003	0.0116765
0.00279704	0.855768	0.0277491	0.0279472	0.00419142	0.00133263	0.00849613	0.0340629	0.0167418	0.0102128	0.00129624	0.00940465
0.00301325	0.863973	0.0162418	0.0157197	0.00361443	0.00213353	0.0300195	0.0333939	0.00701124	0.0117005	0.00193724	0.0112424
0.00284751	0.842953	0.0545629	0.00842402	0.00522246	0.000743967	0.00782244	0.0422258	0.00472464	0.00992159	0.00193681	0.0186151
0.00316855	0.703614	0.0901496	0.101455	0.00514462	0.00104779	0.0100944	0.0605932	0.004788	0.0106152	0.00143963	0.00788981
0.00263069	0.838639	0.0183971	0.0143908	0.00486304	0.00139725	0.0239881	0.052506	0.0127412	0.0177052	0.00122992	0.0115119
0.00224186	0.778418	0.0338939	0.0709685	0.0103744	0.00277868	0.045359	0.02491	0.00729437	0.0132971	0.00213785	0.00832685
0.00297214	0.837309	0.0184915	0.0363191	0.00526435	0.00204381	0.0170522	0.0440777	0.00944405	0.0103001	0.00215195	0.0145736
0.00236146	0.51816	0.0144566	0.170318	0.00853902	0.0180133	0.131561	0.111832	0.00492611	0.0108198	0.00246901	0.00654418
0.00291724	0.812129	0.0196849	0.016176	0.00511288	0.00151755	0.00794224	0.0595431	0.0187347	0.0104925	0.00221728	0.0435323
0.00368051	0.795014	0.0190363	0.0749015	0.0037409	0.00236311	0.0269648	0.0460177	0.00533096	0.0110773	0.00179696	0.0100763
0.00367089	0.716647	0.0113076	0.0191522	0.005681	0.00225269	0.104022	0.0773638	0.00994952	0.0284791	0.00320988	0.0182639
0.0026261	0.827059	0.0218919	0.0209992	0.0120649	0.00149726	0.0723543	0.0147664	0.00487008	0.0117303	0.00195908	0.00818105
0.00289859	0.883711	0.0270368	0.0234872	0.00425657	0.00145555	0.0120335	0.0182164	0.00536559	0.00866479	0.00177773	0.0110961
0.00464149	0.513857	0.0439401	0.0131838	0.00437186	0.00422405	0.0137632	0.132957	0.0705763	0.0868403	0.00272837	0.108917
0.00289373	0.727828	0.0219841	0.01155	0.00446228	0.00098447	0.00618102	0.06845	0.0206842	0.0150841	0.00148934	0.118408
0.00506808	0.666322	0.0497743	0.0890203	0.0211582	0.00305122	0.0754978	0.0472977	0.00484759	0.0235211	0.00266889	0.0117732
0.00273569	0.684745	0.032202	0.064965	0.00394316	0.00285136	0.138079	0.0397903	0.00685845	0.015572	0.00197816	0.00628017
0.0027472	0.728754	0.0562339	0.0460134	0.00543335	0.0018561	0.0939034	0.0446488	0.00269505	0.0121894	0.00143221	0.0040934
0.00513873	0.531696	0.0366105	0.0885594	0.010668	0.00625295	0.0827225	0.121596	0.0181645	0.0334188	0.00699642	0.0581768
0.00356892	0.691052	0.0313844	0.0337594	0.00363678	0.00773073	0.0343216	0.0727956	0.0268256	0.0514575	0.0345091	0.00895805
0.00335014	0.652879	0.0832431	0.0153659	0.0965116	0.00112607	0.0495817	0.0605253	0.0139065	0.012125	0.00324896	0.00813633

## Sheet: E02_A_Golgi
NN outputs for markers (Golgi)
Cytosol	ER	Golgi	Lysosome	Mitochondria	Nucleus	Peroxisome	PM	Endosome	LD	Protein-Complex	Translation
0.00274298	0.211627	0.353788	0.00449377	0.00125412	0.00137307	0.000638591	0.013403	0.298199	0.008163	0.00228688	0.10203
0.00137737	0.21295	0.707098	0.00478912	0.00210326	0.000936404	0.00406372	0.0268546	0.0211222	0.00418417	0.00165354	0.0128677
0.0034438	0.0882453	0.311866	0.000274411	0.000892261	0.00056784	0.0188982	0.00941568	0.545217	0.00456666	0.00345422	0.0131585
0.00272813	0.0184364	0.631298	0.00166448	0.00956459	0.000773413	0.178823	0.0580778	0.086011	0.00681224	0.00405938	0.00175212
0.00318666	0.488842	0.256085	0.00210818	0.00307353	0.00135834	0.00223598	0.043565	0.0976127	0.0121901	0.000710791	0.0890318
0.551647	0.00186209	0.00324231	0.00243193	0.00046851	0.0693515	0.00602524	0.00731844	0.073702	0.0739721	0.174503	0.035476
0.00181666	0.189267	0.637523	0.0231672	0.00232463	0.00327704	0.00826878	0.0817039	0.036311	0.00924974	0.00130405	0.00578708
0.00233697	0.159893	0.696742	0.0260236	0.00244145	0.00277439	0.0117621	0.0849813	0.00485866	0.0046127	0.00131096	0.00226269
0.000613347	0.0130055	0.92472	7.13089e-05	0.00107779	0.000459736	0.0122531	0.0101266	0.028001	0.00616993	0.00261297	0.000889271
0.00134502	0.158112	0.801399	0.00143088	0.00244336	0.000567745	0.0086444	0.0171017	0.00111857	0.00363991	0.00224169	0.00195497
0.00178713	0.00990156	0.80798	0.000932656	0.00121041	0.000657301	0.00296259	0.0205634	0.142256	0.00534939	0.00243426	0.00396558
0.00153245	0.221797	0.689417	0.000174811	0.00209379	0.000629265	0.00414477	0.0593374	0.00561313	0.00898167	0.0021113	0.00416808
0.00368159	0.0382241	0.176141	0.00191318	0	0.000493114	0.000573972	0.00272805	0.588094	0.00611503	0.00340055	0.178635
0.00342326	0.141163	0.213025	0.000749224	0.000216591	0	0.000292685	0.0031423	0.534987	0.00842227	0.00264786	0.0919308
0.00151337	0.270864	0.500076	0.0490983	0.00265585	0.00371383	0.01326	0.0747288	0.0527106	0.00728277	0.00195663	0.0221393
0.00424558	0.322958	0.130819	0.0524593	0.00666317	0.0120005	0.0203026	0.108652	0.294022	0.00877258	0.00274982	0.0363553
0.00109875	0.218313	0.695151	0.000419475	0.00232967	0.00200864	0.00626911	0.041242	0.0199344	0.00954671	0.00147139	0.00221551
0.00196202	0.156466	0.772227	0.000475741	0.00244815	0.00130944	0.00459157	0.0504675	0.00255022	0.00402688	0.00206244	0.00141321
0.00254913	0.244538	0.405956	0.00316119	0.0015814	9.88493e-05	0.000752283	0.0303345	0.211667	0.00883814	0.00170524	0.0888175
0.00461293	0.0570065	0.629453	0.00102375	0.00933338	0.0118774	0.0599284	0.015832	0.0669642	0.139196	0.00202289	0.00274881
0.00841978	0.215626	0.479951	0.00137725	0.00188424	0.000820913	0.00515595	0.102323	0.148503	0.0234726	0.00781005	0.00465687
0.0147254	0.388527	0.119885	0.0506562	0.0115021	0.0101878	0.0492112	0.182495	0.0984515	0.0480305	0.00219248	0.024136
0.000546039	0.00268375	0.715676	0.0246576	0.160448	0.0130706	0.041604	0.0288561	0.00476032	0.00263719	0.00427916	0.000781784
0.00354941	0.177478	0.0762882	0.000245293	0.000752705	0.00211705	0.00237969	0.008024	0.66548	0.00664884	0.00289413	0.0541435
0.102666	0.000667482	0.151945	0.000670069	0	0.00127105	0.00496385	0.0153834	0.488578	0.151044	0.065473	0.0173377
0.00344627	0.0854395	0.388598	0	0.000211035	0.000142265	0.00158072	0.00926641	0.273527	0.0151215	0.113732	0.108936
0.00181803	0.196797	0.632145	0.0095271	0.00215842	0.00143163	0.0174943	0.0791139	0.0375918	0.0172153	0.00135198	0.00335535
0.001679	0.256813	0.391816	0.00140378	0.00194551	0.00279132	0.0287243	0.0456291	0.151529	0.00890618	0.00336965	0.105393
0.0101023	0.00117532	0.225841	0	0.000227918	0.0516372	0.00490427	0.0563785	0.492091	0.0462321	0.107697	0.00371448
0.0052791	0.105367	0.0282395	0.00353032	0.000536414	0.00135182	0.000580381	0.00318301	0.703522	0.00781644	0.00504753	0.135547
0.00125353	0.185217	0.700938	0.0403406	0.00230324	0.000950566	0.008859	0.0341619	0.0141878	0.00854362	0.00115877	0.00208619
0.00112723	0.154358	0.792732	0.000540821	0.00178115	0.00085882	0.00491927	0.00990894	0.0258938	0.00340088	0.00212634	0.00235333
0.00167117	0.246042	0.441774	0.001474	0.00386329	0.00965631	0.0033859	0.036885	0.0185434	0.227339	0.00152177	0.00784358
0.00136046	0.0969756	0.780899	0	0.00233653	0.000376347	0.00398315	0.0472368	0.0472736	0.00936586	0.00180702	0.00838594
0.00439236	0.109056	0.102414	0.00449068	0.000584427	0.00152471	0.000624832	0.00800275	0.555911	0.00684205	0.00628505	0.199872
0.00113375	0.267854	0.617478	0.00462958	0.00229169	0.00128927	0.00662049	0.0826777	0.00622697	0.00678039	0.000643648	0.00237497
0.00171107	0.222744	0.570497	0.0236836	0.00308723	0.00213086	0.0119184	0.114323	0.028847	0.0120282	0.00111924	0.00790961
0.00229127	0.542078	0.134125	0.0092043	0.00327412	0.00174595	0.00730249	0.220694	0.0405772	0.0271891	0.00160366	0.00991517
0.00692537	0.0528805	0.615022	0.0243976	0.00125695	0.00317764	0.00211208	0.0394668	0.172445	0.00359147	0.0115368	0.0671871
0.00162194	0.00265612	0.954161	0.000978652	0.00149872	0.00255294	0.0106858	0.00194861	0.00502738	0.00360711	0.0122031	0.00305883
0.0108979	0.160732	0.051032	0.0165299	0.00450013	0.0954562	0.0343019	0.244874	0.154959	0.118414	0.0178031	0.0905001
0.00115945	0.143303	0.603426	0.0171136	0.0039421	0.00329129	0.00328362	0.0222753	0.080873	0.0392916	0.00810173	0.0739397
0.000682895	0.265097	0.541096	0.00168	0.00252114	0	0.000340103	0.102895	0.0526121	0.0120363	0.000270234	0.0207697
0.002693	0.18991	0.485575	0	0.00119743	0	0.00140599	0.00694006	0.258014	0.013741	0.00497735	0.0355457
0.0017315	0.0573103	0.735591	0.000666296	0.00122581	0	0.00173198	0.0158072	0.120384	0.008743	0.000798313	0.0560102
0.00215244	0.154579	0.389153	0.0036075	0.00287576	0.000968449	0.00565432	0.328039	0.0270175	0.0136418	0.0041926	0.0681197
0.0144657	0.184609	0.31204	0.0190844	0.00353476	0.0242352	0.0225325	0.226533	0.128205	0.042796	0.00537457	0.0165902
0.000994576	0.224831	0.660939	4.8227e-05	0.00221328	0.000503357	0.00728718	0.0455069	0.0215561	0.0312331	0.00177223	0.00311514
0.00533154	0.0794275	0.151773	0.0033453	0.00366056	0.0505239	0.0258891	0.130108	0.252274	0.114807	0.00122687	0.181633
0.00214063	0.143718	0.49875	0.00269093	0.00281321	0.0204637	0.0740271	0.167049	0.0423898	0.0380455	0.00145068	0.00646173
0.100881	0.0330676	0.230087	0.0122131	0.000363265	0.00831071	0.00631865	0.0359024	0.162373	0.156334	0.0815838	0.172564
0.00205062	0.45217	0.337648	0.00341222	0.00255479	0.000759177	0.00286046	0.0668839	0.0805402	0.00800461	0.000929386	0.042186
0.00163927	0.285055	0.58109	0.0105186	0.00236346	0.00100813	0.00526079	0.0619757	0.0229061	0.0103333	0.00123155	0.0166177
0.00133187	0.162762	0.740626	0.000981847	0.00223051	0.000541693	0.0329195	0.0358955	0.00450976	0.0150965	0.00194861	0.0011558
0.00445788	0.284064	0.388725	0.00502496	0.00265413	0.000472944	0.00455492	0.245588	0.0150478	0.010449	0.00695132	0.0320105
0.00263392	0.0482583	0.805632	0.00243358	0.00176066	0.00241713	0.0243924	0.0960963	0.00263004	0.00946781	0.00198779	0.00229003
0.00264892	0.24177	0.354161	0.00101076	0.000603926	0.000624747	0.000876988	0.023987	0.306992	0.0508958	0	0.0164286
0.00521006	0.356866	0.172867	0.0393239	0.00299767	0.0151026	0.0167253	0.169999	0.0897844	0.0705139	0.00522069	0.0553887
0.00508226	0.390289	0.0497988	0.0109937	0.00189164	0.00248766	0.0042371	0.120854	0.241859	0.0453052	0.00256305	0.124638
0.00485684	0.202332	0.196304	0.0163451	0.0199451	0.0715962	0.0116684	0.130026	0.276341	0.0434951	0.00368446	0.0234046
0.00619684	0.0697355	0.402517	0.00457205	0.00111943	0.00136607	0.000502132	0.00539885	0.331164	0.0082589	0.00628747	0.162882
0.0112225	0.0122597	0.623745	0.0311395	0.00253068	0.00682311	0.0272981	0.0287166	0.097788	0.0190301	0.132911	0.00653535
0.00704245	0.0853849	0.586898	0.0186703	0.00271176	0.0113682	0.003549	0.0186847	0.18207	0.0130577	0.00860237	0.0619612
0.0200021	0.127527	0.0349163	0.0244894	0.0187246	0.100227	0.00857083	0.219389	0.228844	0.119893	0.00585169	0.0915653
0.00094504	0.199848	0.695735	0.00213069	0.00234328	0.000829317	0.00537057	0.0543858	0.0159212	0.0108552	0.00182911	0.00980663
0.00102657	0.212546	0.732425	0.00105897	0.00229076	0.000969997	0.00657379	0.0250102	0.0104855	0.00361672	0.00137759	0.0026196
0.00380687	0.104117	0.726217	0.0129586	0.00221612	0.00437852	0.0164582	0.0282659	0.0462905	0.0127722	0.00822051	0.0342982
0.00043611	0.179373	0.79301	0.00151583	0.00134859	4.90922e-05	0.00164342	0.00431578	0.00618107	0.00554631	0.00178575	0.00479467
0.00247175	0.497028	0.223519	0.00239268	0.0029471	0.00127468	0.00362067	0.116622	0.0834812	0.0410023	0.000977458	0.0246635
0.0173871	0.0967872	0.106286	0.0749907	0.00619816	0.0608404	0.0259884	0.102288	0.0865762	0.0530436	0.0236613	0.345953
0.00255772	0.329772	0.287831	0.00502094	0.00200018	0.00135236	0.000564167	0.0663382	0.14903	0.0116868	0.00303776	0.140808
0.00238344	0.0198997	0.910472	0.00119544	0.00141008	0.00102428	0.012255	0.0284308	0.00195779	0.0150113	0.00246143	0.00349875
0.00886537	0.0927774	0.563783	0.0265467	0.00168051	0.00837223	0.0075402	0.112093	0.117403	0.0265991	0.0037667	0.030572
0.135559	0.0410173	0.0523939	0.00153653	0.00130867	0.00163305	0.00161841	0.0946639	0.377688	0.0648191	0.110433	0.117329
0.00198353	0.359805	0.377384	0.00296103	0.00238978	0.00261554	0.0235862	0.0530172	0.1336	0.00860843	0.00288042	0.0311688
0.0390633	0.0230856	0.466651	0.0392747	0.00911395	0.0249371	0.0175994	0.138716	0.190852	0.0356258	0.00922939	0.00585203
0.00163101	0.193022	0.587556	0.0236462	0.00160202	0.000566505	0.00182344	0.0195133	0.1362	0.0094318	0.00279403	0.0222137
0.00219942	0.149399	0.31273	0.0402538	0.00276974	0.0039959	0.0174822	0.120286	0.0718686	0.0738242	0.20192	0.00327168
0.00192091	0.448917	0.277978	0.0257392	0.00723439	0.00359737	0.01589	0.0996994	0.0315276	0.0292344	0.00932295	0.0489389
0.00154157	0.339926	0.519169	0.00694602	0.00302402	0.00113492	0.00952072	0.0806504	0.00992786	0.0121498	0.00121891	0.0147915
0.485725	0.00315712	0.0266685	0.00295356	0.000795508	0.00899152	0.00509499	0.211868	0.0927715	0.0579286	0.103853	0.000192045
0.00158027	0.199009	0.688744	0.0251249	0.00212859	0.00145194	0.00595465	0.0499128	0.00680409	0.0114661	0.00187549	0.00594836
0.176124	0.00455333	0.0106662	0.00307783	0.000772574	0.0230858	0.00309806	0.0295484	0.583753	0.0743151	0.0574166	0.0335897
0.00108076	0.185641	0.735531	0.00026065	0.00115	0.00106397	0.00156314	0.0281492	0.00164493	0.0299447	0.000887197	0.0130838
0.00195147	0.249263	0.121721	0.0214723	0.00932542	0.12448	0.0472842	0.273742	0.015557	0.108765	0.000933979	0.0255039
0.000611364	0.20349	0.454725	0.0175255	0.00152826	0.00214334	0.0174169	0.0438127	0.0509166	0.080709	0.125149	0.00197306
0.000998458	0.206629	0.694038	0.00761936	0.00207234	0.00120012	0.00536284	0.0428416	0.0243156	0.00506457	0.00240214	0.00745528
0.000595812	0.19642	0.773158	0.00225401	0.00219709	0.00217415	0.00652356	0.0098976	0.00127658	0.00194705	0.00218578	0.00137047
0.00233069	0.20635	0.541596	0.00236422	0.00183618	0.00102378	0.00159686	0.0172948	0.170486	0.00701641	0.00160889	0.0464958
0.000530047	0.0128254	0.625779	0.0870021	0	0.00823858	0.000605163	0.00202672	0.0185518	0.00106175	0.00784304	0.235537
0.00093436	0.0366489	0.863875	0.00189791	0.00101622	0.00278035	0.00378681	0.0073185	0.0680355	0.00394757	0.0027336	0.00702479
0.000827672	0.196574	0.747816	5.46307e-05	0.00199366	0.000136119	0.00531076	0.010027	0.0270335	0.00392808	0.00175394	0.00454442
0.00198924	0.122109	0.760348	0	0.00107059	0.000443582	0.00180739	0.00575829	0.0980768	0.00213401	0.00127449	0.00498862
0.157168	0.0331165	0.0313689	0.0167695	0.00227575	0.0225636	0.0146768	0.136427	0.411179	0.113449	0.0312334	0.0297725
0.00153041	0.0657788	0.400847	0.223738	0.0141223	0.00791323	0.0123506	0.0873177	0.0214948	0.0312409	0.130498	0.00316815
0.00190816	0.164804	0.713313	0.000267674	0.00172931	0.000608008	0.00173654	0.0338835	0.0341794	0.00734021	0.00211716	0.0381123
0.0150808	0.102246	0.271737	0.000382453	0.000898949	0.00141491	0.00585533	0.0601789	0.300048	0.147006	0.0405919	0.0545604
0.000279342	0.00945808	0.744019	0	0.000703487	0	0.00115036	0.0089018	0.182578	0.00665843	0.012148	0.034104
0.00111433	0.223343	0.702692	0.00267523	0.00241005	0.000858035	0.00414529	0.0222475	0.0155086	0.0174149	0.00141157	0.00617959
0.000475051	0.0761456	0.532939	0.00208634	0.0034581	0.00948483	0.166336	0.124064	0.0100193	0.0737259	0.000585713	0.000679434
0.00554491	0.004414	0.752351	0.00108613	0.001451	0.000631602	0.0133302	0.0156528	0.101004	0.00839865	0.0882789	0.00785766
0.00255262	0.22283	0.174255	0.0018365	0.00082135	0.000558529	0.00267354	0.00202518	0.380947	0.00419831	0.00166095	0.205642
0.00144636	0.192777	0.718538	0.00103161	0.00253911	0.000160488	0.0354059	0.035113	0.00401335	0.00606429	0.00162761	0.00128356
0.00186765	0.0117419	0.84713	0	0.000951542	0.000654922	0.0742928	0.00478994	0.0189768	0.0339414	0.00398408	0.00166865
0.0751236	0.0326929	0.156042	0.0140318	0.00026558	0.0321587	0.00289714	0.0290869	0.512412	0.0169231	0.0109325	0.117434
0.00147146	0.256152	0.606183	0.00529381	0.00258423	0.00211609	0.00599662	0.0817756	0.0220236	0.0115428	0.000808203	0.00405307
0.00551483	0.0053449	0.187237	0.0024134	0.000218303	0.0086781	0.00353074	0.00646298	0.0782874	0.46742	0.162097	0.0727952
0.0011529	0.201467	0.761289	0.00119107	0.00234963	0.000201128	0.00411123	0.02054	0.00170927	0.00231094	0.00240112	0.00127699
0.00117889	0.218098	0.727593	0.000530082	0.0022731	0.000433693	0.00595723	0.0206254	0.0131089	0.00574726	0.00194083	0.00251299
0.00185157	0.128617	0.723588	0.0116308	0.00473004	0.00628928	0.0266703	0.0527452	0.0262579	0.00733487	0.00394005	0.00634465
0.0075093	0.00235891	0.456061	0.000784222	0.0407217	0.086995	0.100359	0.156035	0.0907543	0.0545417	0.00335102	0.000528641
0.00118602	0.24323	0.67015	0.005154	0.00219543	0.00124176	0.00441514	0.043967	0.0127013	0.00992247	0.00133032	0.00450611
0.00182794	0.210054	0.683687	0.00863069	0.00236671	0.00185324	0.00619567	0.0646637	0.0106855	0.0064485	0.000953613	0.00263378
0.00288212	0.0908863	0.610767	0.00318085	0.00136491	0.00205719	0.00169441	0.00999328	0.129644	0.0124637	0.0131376	0.121929
0.00149075	0.200234	0.720707	0.00181944	0.0020939	0.000978558	0.0120616	0.0477527	0.00494519	0.00494474	0.00134626	0.00162617
0.00161176	0.731501	0.0927379	0.0504086	0.00471516	0.000276807	0.00807538	0.0639337	0.0198051	0.00727152	0.000878662	0.0187842
0.0020762	0.112604	0.478888	0.000318411	0.000876247	0	0	0.0115326	0.324774	0.0116717	0	0.057259
0.00147805	0.20104	0.689939	0.000697388	0.00208654	0.000545746	0.0028134	0.032225	0.0370214	0.00642109	0.00306561	0.0226665
0.00214194	0.017141	0.728085	0.000616649	0.00212932	0.00154488	0.0369725	0.134989	0.0721737	0.00312469	0.000661118	0.00042098
0.0024446	0.290952	0.239462	0.00429949	0.000989578	0.00300879	0.0014059	0.0763695	0.267276	0.0196866	0.0023788	0.091726
0.00203942	0.0545718	0.632095	0.000280826	0.000825629	0.00156217	0.000878509	0.0596034	0.0278981	0.182517	0.00213026	0.0355976
0.00304491	0.209391	0.272961	0.000254409	0.00803893	0.00696902	0.120954	0.0763705	0.159724	0.0210267	0.000871297	0.120394
0.00357057	0.277043	0.152398	0.00732059	0.000763985	0.00216537	0.00175826	0.0241584	0.275816	0.00634358	0.00107148	0.247591
0.000907411	0.159128	0.704735	0.0131436	0.00246518	0.00227202	0.00879127	0.0692501	0.00394273	0.0160155	0.00170925	0.0176399
0.0019889	0.00679188	0.816434	0.00227488	0.00380929	0.000101042	0.117427	0.0411851	0.00496078	0.00254621	0.00178034	0.00070137
0.0581804	0.03193	0.250354	0.00264906	0.000771154	0.00201552	0.00165032	0.0381954	0.405332	0.0507423	0.0310771	0.127103
0.000937622	0.0577574	0.653392	0.0584011	0.0037211	0.00275839	0.120254	0.0660055	0.00586046	0.0296814	0.000937492	0.000294107
0.0010173	0.214857	0.736314	0.000664731	0.00241968	0.000236259	0.00929327	0.0208445	0.00533031	0.00455577	0.00152205	0.00294509
0.0017848	0.119097	0.778737	0.00232825	0.00215136	0.00141479	0.0242444	0.0517453	0.0109498	0.00432971	0.00271718	0.000500821
0.00113908	0.18467	0.778508	0.000114093	0.00246501	0.000604657	0.0032063	0.0171126	0.00229629	0.00436299	0.00212568	0.00339546
0.00151105	0.187541	0.692212	0.000660346	0.00166294	0.00104514	0.00268426	0.0130261	0.0577329	0.00704142	0.00303511	0.0318473
0.001081	0.176974	0.765191	0.0004033	0.00304484	0	0.00236772	0.0267762	0.0117709	0.00769286	0.00112447	0.00357354
0.00242936	0.107531	0.353041	0	0	0.000505931	0.00160978	0.00457288	0.513524	0.00533235	0.00161952	0.00983372
0.00155943	0.0749945	0.651814	0.0976612	0.00213879	0.0225411	0.0645565	0.065346	0.00844694	0.00666805	0.00290737	0.00136586
0.012907	0.265785	0.444892	0.000455858	0.00229715	0.000814531	0.0198865	0.0448773	0.118949	0.0745037	0.00944748	0.00518364
0.000868023	0.406865	0.12597	0.00713112	0.244812	0.00218433	0.0838035	0.112969	0.00378869	0.00460326	0.00318614	0.00381867
0.00112368	0.211652	0.722199	0.00108034	0.00243728	0.000649587	0.00818516	0.0313089	0.00992192	0.00750658	0.00147954	0.00245594
0.00279033	0.0115836	0.943001	0.000590322	0.00134651	0.000590253	0.0140837	0.013463	0.00222792	0.00569172	0.00205756	0.00257372

## Sheet: E02_A_Lysosome
NN outputs for markers (Lysosome)
Cytosol	ER	Golgi	Lysosome	Mitochondria	Nucleus	Peroxisome	PM	Endosome	LD	Protein-Complex	Translation
0.00269681	0.023647	0.00350321	0.775393	0.093323	0.0350768	0.04935	0.0066546	0.00309769	0.000729959	0.00188617	0.00464206
0.0121207	0.500035	0.0349694	0.0754023	0.00783487	0.0224204	0.0383067	0.162927	0.0610393	0.0273033	0.0112509	0.0463899
0.00567093	0.298371	0.00803168	0.419751	0.0206304	0.0273321	0.0856369	0.0125356	0.0444882	0.00851894	0.0256037	0.043429
0.00367873	0.0199364	0.00459926	0.779781	0.07029	0.0113204	0.0826751	0.00717519	0.00545829	0.00361753	0.00330227	0.00816543
0.0036583	0.00927377	0.00443857	0.838107	0.0224346	0.0105428	0.0828277	0.00624769	0.0062293	0.00401526	0.00382841	0.00839628
0.0585663	0.205119	0.00426393	0.129185	0.0341896	0.0187572	0.0854043	0.241051	0.0804766	0.0811944	0.0207695	0.0410223
0.00339424	0.020776	0.00434726	0.835185	0.0137573	0.0107442	0.0776373	0.0105923	0.0068561	0.00461548	0.00364268	0.00845178
0.00232607	0.636203	0.0417212	0.171528	0.00636883	0.00100879	0.00839292	0.0551254	0.0184496	0.0143748	0.00104044	0.0434601
0.00291492	0.0319709	0.00435958	0.865512	0.00955999	0.012715	0.0385786	0.0112681	0.00581312	0.00496946	0.00363581	0.0087028
0.0112586	0.0170991	0.0846794	0.56972	0.0765012	0.0153184	0.0104087	0.00595776	0.00957856	0.00805343	0.185195	0.00622945
0.00352961	0.0443186	0.00488757	0.817006	0.00609013	0.0176005	0.0719074	0.00935767	0.00754299	0.00504367	0.00436416	0.00835157
0.00620433	0.0133772	0.00321798	0.772238	0.0098547	0.0652929	0.0748287	0.0229966	0.00729609	0.00690019	0.00784766	0.00994606
0.00304678	0.0106539	0.00467692	0.860741	0.0159157	0.0163886	0.062357	0.00525253	0.00591586	0.00426399	0.00301419	0.0077736
0.00374647	0.218152	0.00530344	0.645965	0.0165187	0.0051743	0.0831649	0.00382577	0.00540931	0.00640333	0.00107547	0.00526137
0.00479608	0.0127112	0.0051066	0.771754	0.0128884	0.0130313	0.151379	0.00828873	0.00437023	0.00579369	0.00365276	0.00622834
0.00399465	0.0128016	0.00439349	0.859617	0.00977353	0.0269598	0.0416528	0.00669342	0.00923321	0.00483167	0.00999657	0.0100519
0.00255735	0.272013	0.00484325	0.612824	0.00385263	0.0106091	0.0307598	0.0334095	0.00772571	0.00555836	0.00272425	0.0131226
0.00259331	0.237895	0.0118338	0.582737	0.00626952	0.010055	0.022519	0.0707874	0.0150169	0.00655912	0.00243437	0.0312994
0.00356	0.0103344	0.00422437	0.807253	0.0252383	0.0139095	0.0892224	0.0244615	0.00607365	0.00373916	0.00368063	0.00830275
0.00199174	0.395476	0.0191541	0.462353	0.00418929	0.0102742	0.0291349	0.0303999	0.0138697	0.00887457	0.00228571	0.0219972
0.00282352	0.10488	0.00544279	0.794462	0.0273565	0.0134719	0.0175977	0.0166752	0.0057405	0.00498319	0.00144318	0.00512378
0.00429802	0.0115964	0.00406624	0.827722	0.0142312	0.0128012	0.0938879	0.00857169	0.00663099	0.00456947	0.00354097	0.00808384
0.00332142	0.00891263	0.00407792	0.819148	0.0343481	0.0141676	0.0857138	0.00823045	0.00627015	0.00407428	0.00353031	0.00820566
0.00228197	0.284469	0.00610454	0.598461	0.00333658	0.00983314	0.0137371	0.0235186	0.0130192	0.00588775	0.00199528	0.0373563
0.00308706	0.00772121	0.00517854	0.875928	0.0137958	0.0332711	0.0165348	0.0234724	0.00427656	0.00397274	0.00409039	0.00867116
0.0187056	0.522453	0.0592666	0.0558021	0.00356582	0.0161428	0.00849587	0.1654	0.0478944	0.0186551	0.0176084	0.0660107
0.0147751	0.130689	0.0147797	0.511258	0.106831	0.09231	0.019774	0.00529508	0.016493	0.00846343	0.0762059	0.00312581
0.00613378	0.0119228	0.00442384	0.788967	0.00775544	0.0440568	0.0672625	0.0317416	0.0129277	0.00416717	0.00662228	0.0140192
0.0039174	0.196898	0.00438226	0.529	0.00406	0.0126716	0.0833999	0.0118887	0.0431439	0.00830405	0.00394594	0.0983876
0.00409594	0.0192821	0.00402749	0.852132	0.0120671	0.0112227	0.0653497	0.00853968	0.0063393	0.00471016	0.00351228	0.00872132
0.00670315	0.0127973	0.0035782	0.748513	0.026603	0.0205848	0.143135	0.0150036	0.00594682	0.00479714	0.00392026	0.00841818
0.0036417	0.0117927	0.00442569	0.834979	0.0109132	0.0116902	0.094764	0.00497335	0.00623583	0.00490311	0.00335364	0.00832712
0.00280229	0.00741637	0.00417122	0.857119	0.0300861	0.0145704	0.061666	0.00293313	0.00526651	0.00389333	0.00163353	0.00844218
0.00257768	0.0103461	0.00442738	0.852647	0.0224807	0.0161529	0.0673109	0.00539634	0.005969	0.00346108	0.00127094	0.00795973
0.00403482	0.201232	0.0069117	0.601786	0.00190951	0.0292046	0.0376654	0.0714375	0.0134229	0.010782	0.00275987	0.0188535
0.00382287	0.0105864	0.00490037	0.871265	0.0228063	0.0140846	0.0445344	0.00633725	0.00623909	0.00365927	0.00390036	0.00786439
0.00328063	0.0137266	0.0044317	0.824225	0.0131147	0.0145683	0.0796307	0.0251136	0.00615073	0.00372972	0.00379344	0.00823512
0.00602253	0.00555879	0.00306965	0.665898	0.0422938	0.0258172	0.213985	0.00951912	0.00666382	0.00659442	0.00714207	0.0074352
0.00338331	0.0108719	0.00453134	0.845882	0.0347712	0.0162862	0.0575532	0.00551272	0.00640973	0.00345608	0.00354863	0.00779405
0.0035506	0.00940994	0.00423661	0.847813	0.021328	0.0128408	0.0750411	0.00404272	0.0060854	0.00426152	0.0031358	0.00825436
0.00273969	0.00460992	0.00285577	0.761513	0.0524235	0.0130033	0.144359	0.00218181	0.00399761	0.00310422	0.00181538	0.00739605
0.00331509	0.0146194	0.00472012	0.842658	0.012316	0.011398	0.0763525	0.0123002	0.0060109	0.00431797	0.00305744	0.00893465
0.00371878	0.192815	0.00480697	0.659745	0.00446302	0.0101189	0.0535292	0.0442673	0.00661492	0.00578009	0.00250714	0.0116328
0.00347409	0.00992966	0.00442795	0.866106	0.0120214	0.0141465	0.0613299	0.00623646	0.00616279	0.00423224	0.00372173	0.00821124
0.00362103	0.0124533	0.00446572	0.808231	0.0130233	0.0158681	0.0804914	0.0393791	0.00602042	0.00434697	0.00326562	0.00883378
0.0051965	0.00694718	0.00405821	0.786737	0.00960453	0.0247644	0.128468	0.00880738	0.00766305	0.00547365	0.00478545	0.00749503
0.00268218	0.0131898	0.00466112	0.882352	0.0099534	0.0151501	0.0464689	0.00479997	0.005534	0.00431167	0.00254717	0.00834954
0.00322029	0.00807614	0.00458196	0.873609	0.00886209	0.0152315	0.0593753	0.00469645	0.00627511	0.00436223	0.0035611	0.00814917
0.702132	0.00450935	0.00603265	0.0569226	0.00668606	0.0207617	0.00694338	0.0605547	0.0428994	0.0449087	0.0287793	0.0188697
0.00299613	0.0201415	0.00454786	0.715757	0.0440756	0.00802067	0.179225	0.00496708	0.00612765	0.00359407	0.0030006	0.00754681
0.00231436	0.150368	0.00511732	0.701268	0.00339897	0.014949	0.0437175	0.0506597	0.00781168	0.00629527	0.00230442	0.0117952
0.00399535	0.0873434	0.00574295	0.626189	0.0867699	0.010347	0.102888	0.0557939	0.00851408	0.00398838	0.00469459	0.00373282
0.00420377	0.196935	0.00492661	0.582288	0.00993657	0.012343	0.0830895	0.042876	0.0271502	0.00608645	0.0112048	0.0189592
0.00676458	0.357905	0.0087238	0.374882	0.0312785	0.0182549	0.0503414	0.0683472	0.0432936	0.00825016	0.0207939	0.0111653
0.0027518	0.0431041	0.00507695	0.832126	0.0160787	0.0196534	0.020553	0.0401655	0.00590822	0.00393583	0.00346806	0.00717836
0.00323969	0.0143945	0.00440568	0.875797	0.0113573	0.0122501	0.0507071	0.0053313	0.00636738	0.00417943	0.0035973	0.00837361
0.0034948	0.320644	0.00814172	0.499782	0.0119258	0.0131461	0.0102755	0.0868139	0.00993884	0.00868113	0.00315504	0.0240015
0.00336335	0.0121449	0.00491224	0.882477	0.00495352	0.0163354	0.0430492	0.0116212	0.00597341	0.00398965	0.00327433	0.00790525
0.00278779	0.00575845	0.00430154	0.829331	0.0328479	0.0169474	0.0880054	0.00223636	0.00483378	0.00350909	0.00155876	0.00788232
0.00353336	0.0658773	0.00412142	0.734507	0.0635918	0.0172481	0.0814222	0.0128734	0.00402878	0.00323303	0.0019315	0.00763205
0.00157875	0.200587	0.00451558	0.203235	0.238714	0.00347677	0.309614	0.0168043	0.00323848	0.0120246	0.00327303	0.00293886
0.00305083	0.010831	0.00455056	0.891823	0.00716426	0.0138218	0.0400206	0.00590473	0.00638511	0.00446543	0.00348491	0.00849787
0.00304105	0.0071941	0.00446563	0.860864	0.0128376	0.0164879	0.0686587	0.00519488	0.00586995	0.00386487	0.00308818	0.00843337
0.00287805	0.246955	0.00696941	0.642716	0.00804947	0.0116937	0.0118044	0.0304324	0.00898284	0.00573589	0.00370473	0.0200782
0.00726951	0.568944	0.010705	0.232991	0.00397291	0.00752103	0.0165776	0.0322861	0.0442566	0.0114127	0.0147186	0.0493447
0.004118	0.0127963	0.00479212	0.86344	0.0260243	0.0142865	0.0471645	0.00538085	0.00643968	0.00441505	0.00348073	0.00766188
0.0140838	0.422661	0.0229623	0.0881985	0.0256762	0.0398396	0.0189031	0.181343	0.06722	0.0413591	0.0237604	0.0539932
0.00330913	0.00864449	0.00492804	0.881149	0.0102919	0.0154294	0.0436222	0.0108204	0.00591881	0.00403659	0.00370917	0.00814105
0.00299738	0.0127972	0.00455959	0.888335	0.00685794	0.0206389	0.0350284	0.0058927	0.00648099	0.0041502	0.00361266	0.00864933

## Sheet: E02_A_Nucleus
NN outputs for markers (Nucleus)
Cytosol	ER	Golgi	Lysosome	Mitochondria	Nucleus	Peroxisome	PM	Endosome	LD	Protein-Complex	Translation
0.00668734	0.0764872	0.00561129	0.032411	0.00319664	0.696105	0.0328541	0.0944145	0.00321613	0.0367979	0.00435895	0.00785972
0.206924	0.00141415	0.00642578	0.00796576	0.004457	0.479807	0.00376894	0.00568757	0.00413947	0.0363096	0.232705	0.0103945
0.0136782	0.00818952	0.00408919	0.0321357	0.0689271	0.721787	0.0247596	0.0901924	0.0124547	0.00893808	0.00948956	0.0053592
0.0126745	0.0390538	0.00895684	0.017319	0.00459567	0.181415	0.00644957	0.0941251	0.115587	0.0533633	0.0132346	0.453226
0.00366258	0.0843799	0.0386554	0.0638979	0.00598283	0.524109	0.0119703	0.206081	0.00719438	0.0280676	0.00659698	0.0194025
0.00461379	0.0244461	0.00689281	0.0712595	0.00517012	0.671129	0.0604936	0.0613943	0.0436131	0.00768596	0.0149196	0.0283826
0.0539805	0.00564847	0.00477573	0.0124615	0.0127628	0.650338	0.00994883	0.0194006	0.0313884	0.152542	0.0230132	0.0237398
0.117093	0.00364355	0.00494409	0.0263675	0.0108156	0.578301	0.010233	0.0321666	0.048062	0.0161963	0.043437	0.10874
0.108326	0.0011275	0.00314444	0.0216224	0.00534594	0.703521	0.0110893	0.0616899	0.00760752	0.056007	0.0160885	0.00442975
0.0284833	0.0520851	0.00528066	0.0375636	0.00118752	0.320419	0.00930314	0.0714237	0.0485419	0.0765064	0.031908	0.317298
0.00407016	0.0360742	0.0040016	0.0842043	0.0106937	0.427543	0.0198898	0.0944009	0.00745885	0.0344317	0.00596738	0.271264
0.00778183	0.00221758	0.00324451	0.0184108	0.0404181	0.753142	0.0433303	0.0921616	0.00304406	0.0242322	0.00660783	0.0054093
0.0511203	0.0326496	0.00405512	0.077009	0.0033107	0.410691	0.0176866	0.2167	0.0277696	0.0216253	0.100968	0.0364145
0.00614691	0.00227824	0.00388052	0.0118049	0.0109161	0.777802	0.0753901	0.0733156	0.00208917	0.0255969	0.00567336	0.00510625
0.139826	0.00231674	0.00384512	0.00378797	0.0123637	0.686999	0.0097599	0.0126879	0.00526022	0.114185	0.00512079	0.00384716
0.00489824	0.00333229	0.00386607	0.00233249	0.0176616	0.8674	0.00918205	0.0195659	0.00167751	0.0571576	0.00485731	0.00806898
0.00416755	0.0250304	0.00407102	0.0214361	0.0041588	0.627933	0.0586914	0.0895596	0.00580197	0.0283738	0.00581928	0.124957
0.010479	0.0117124	0.0035193	0.0243577	0.00746859	0.64076	0.0228901	0.0863751	0.010965	0.138602	0.0126078	0.0302626
0.00543495	0.00719115	0.00576044	0.00807792	0.00871157	0.633385	0.0906307	0.103416	0.00329197	0.12395	0.00507969	0.00507124
0.158314	0.00348806	0.0072475	0.00936761	0.0143741	0.603397	0.00594978	0.00896369	0.0681835	0.0872743	0.0217408	0.011699
0.153058	0.00194982	0.00214892	0.0281587	0.0184087	0.614046	0.0133028	0.0901206	0.00582684	0.0157907	0.0229253	0.0342634
0.0209828	0.0856095	0.0897402	0.0245209	0.00553086	0.0757472	0.00464452	0.0140283	0.0203533	0.0279187	0.0343942	0.596529
0.00691224	0.00844962	0.00628776	0.0620229	0.0409986	0.42471	0.0223928	0.129396	0.0077271	0.0285368	0.246931	0.0156354
0.182605	0.00120949	0.00194931	0.00860111	0.00914706	0.655749	0.0241856	0.0625848	0.00450207	0.0265662	0.0118008	0.0110996
0.00532653	0.00423541	0.00574897	0.00298962	0.0161722	0.75986	0.0131215	0.00665262	0.0027347	0.172023	0.00572621	0.00540952
0.0169576	0.0650663	0.00602102	0.0734863	0.00262319	0.161731	0.00510685	0.0668438	0.0590903	0.0250517	0.0252984	0.492724
0.0618136	0.0522594	0.00371561	0.0830085	0.00123298	0.23543	0.0199799	0.100932	0.0526381	0.0523812	0.0376539	0.298956
0.0170334	0.0146918	0.00281052	0.0262753	0.00309574	0.192014	0.00302128	0.0274035	0.0525598	0.0151127	0.0399824	0.606
0.00368395	0.00343029	0.0123383	0.0114989	0.0325551	0.89916	0.0104029	0.00925201	0.0025288	0.00493292	0.00542169	0.00479484
0.00504566	0.00234419	0.00493872	0.0375038	0.0229622	0.807127	0.0233942	0.0782573	0.00191959	0.00636796	0.00514078	0.00499875
0.0472857	0.0155758	0.0229392	0.0643386	0.00379113	0.531862	0.0161955	0.0532648	0.0444608	0.098429	0.0307183	0.0711393
0.107634	0.0149211	0.00157304	0.112068	0.00804298	0.441896	0.0398085	0.09436	0.0726902	0.0380686	0.0368778	0.0320595
0.110597	0.00207081	0.00261241	0.163994	0.00848835	0.553646	0.0495887	0.0626541	0.00163817	0.0317245	0.00721918	0.0057665
0.00421974	0.00239694	0.0120031	0.00800146	0.0123529	0.766331	0.0776425	0.0718256	0.00301442	0.0344367	0.00242186	0.0053539
0.0785923	0.0032196	0.00980712	0.00230986	0.0103875	0.775972	0.0074697	0.0230652	0.00175754	0.0535719	0.00873325	0.025114
0.0056405	0.00243541	0.00383249	0.0141129	0.0436269	0.79957	0.0910286	0.020929	0.00254778	0.0047975	0.00678463	0.00469384
0.00748685	0.00228299	0.00287593	0.102232	0.0299872	0.733623	0.0607333	0.0445395	0.00205184	0.00466913	0.00451157	0.00500717
0.00383918	0.00371557	0.0125874	0.00291178	0.226365	0.553795	0.0145321	0.145772	0.00274149	0.0122739	0.00983845	0.0116284
0.0792732	0.00149383	0.0232658	0.0145581	0.0139108	0.621358	0.0361788	0.0450957	0.0017632	0.0124812	0.012737	0.137884
0.0471255	0.00145009	0.00419235	0.0102491	0.0178588	0.746726	0.0349426	0.1147	0.00223785	0.00874837	0.00710767	0.00466178
0.00696001	0.00496208	0.0021084	0.0667128	0.0311107	0.557983	0.240998	0.0725083	0.0020256	0.00428721	0.00349902	0.00684504
0.0124504	0.00325815	0.00669641	0.111403	0.115308	0.484641	0.167466	0.0649494	0.00564698	0.0214624	0.00201952	0.00469808
0.00686379	0.00435901	0.00237378	0.032512	0.0163991	0.753893	0.0738477	0.0826113	0.00199212	0.0133572	0.00432146	0.0074694
0.148278	0.00271444	0.00348958	0.0161838	0.00981274	0.592447	0.0129521	0.104946	0.0121241	0.0339725	0.0113772	0.0517022
0.00931662	0.00386024	0.00348135	0.0149871	0.0389327	0.757235	0.0478202	0.0594843	0.00174281	0.0195458	0.0376965	0.00589687
0.313359	0.000886256	0.00139514	0.00520095	0.00468026	0.332772	0.00113062	0.00220035	0.0105255	0.0845858	0.0416348	0.20163
0.588875	0.00241993	0.00322224	0.00584177	0.00464018	0.342921	0.00418267	0.0216085	0.00550569	0.00347844	0.0119203	0.00538457
0.00772171	0.00335811	0.127436	0.0173678	0.00920806	0.54547	0.0111538	0.00810968	0.0303889	0.0172299	0.0199556	0.2026
0.162674	0.0896452	0.00301173	0.0617271	0.0100163	0.444392	0.0398218	0.104555	0.00480803	0.0245589	0.0392249	0.0155652
0.00357642	0.00310442	0.00375686	0.00892922	0.0308656	0.853735	0.0304534	0.0483724	0.00239269	0.00412669	0.0062814	0.00440604
0.0152186	0.00492133	0.0022022	0.0069716	0.24142	0.642937	0.012248	0.0383939	0.00219891	0.0143223	0.011372	0.00779453
0.00207947	0.079955	0.189289	0.22762	0.206408	0.0917206	0.010356	0.175259	0.00330777	0.00591314	0.00339339	0.00469906
0.00424076	0.00387418	0.003435	0.011957	0.015655	0.774307	0.0892297	0.0746914	0.00203983	0.0107709	0.00403998	0.00575953
0.33737	0.000859583	0.00141151	0.011773	0.00566836	0.412909	0.00724099	0.0449214	0.0140177	0.0271155	0.0784344	0.0582781
0.00676981	0.0715283	0.00749241	0.108538	0.0029811	0.2176	0.00886709	0.0429663	0.0409323	0.0190994	0.02342	0.449805
0.00558935	0.082378	0.00480874	0.264028	0.00250425	0.261359	0.0774467	0.0879267	0.0192374	0.0453183	0.00924385	0.14016
0.0449252	0.00814679	0.00461892	0.0821413	0.0208217	0.519591	0.0263698	0.0948849	0.0127514	0.0431649	0.040338	0.102246
0.531368	0.00202319	0.00161472	0.00837827	0.00958224	0.289057	0.0118302	0.0247053	0.0117267	0.0933371	0.0123456	0.00403111
0.0177852	0.013364	0.0156327	0.0282598	0.0153285	0.477206	0.0227616	0.153127	0.0512734	0.0640492	0.0112005	0.130012
0.00433354	0.0055521	0.00487935	0.198934	0.00286672	0.673795	0.0119275	0.0234636	0.0135828	0.0495898	0.00412055	0.00695587
0.291703	0.00176416	0.00142971	0.0100702	0.04014	0.410661	0.0102395	0.0502297	0.0161427	0.0740181	0.0657542	0.0278479
0.00849597	0.0047393	0.0107535	0.0506779	0.0674903	0.539194	0.0434091	0.0648545	0.00157427	0.00623983	0.190726	0.011846
0.00632157	0.00999602	0.00522982	0.04265	0.00601284	0.770936	0.0172421	0.1014	0.00803656	0.0146416	0.00884358	0.00869007
0.173063	0.00102481	0.00233334	0.00125922	0.0759713	0.565923	0.0127887	0.0152811	0.00393051	0.0156506	0.131168	0.00160718
0.00522242	0.00176777	0.010169	0.0245754	0.0960595	0.697509	0.0477276	0.0117288	0.00221225	0.00157678	0.0224956	0.0789558
0.0152057	0.00734013	0.00639169	0.0349757	0.00995278	0.610457	0.134535	0.0514122	0.0239299	0.00739237	0.0892054	0.00920143
0.0456295	0.00177063	0.00258739	0.013587	0.024439	0.769965	0.0350131	0.0848641	0.00245933	0.00652348	0.00615936	0.00700178
0.0493005	0.00181076	0.00124077	0.0217966	0.0151314	0.744687	0.0509336	0.0771142	0.00260016	0.0251913	0.00612275	0.00407131
0.00286211	0.0592618	0.00309851	0.05206	0.00880675	0.627639	0.0420864	0.07672	0.00458721	0.066145	0.00660474	0.0501288
0.00387806	0.173549	0.0108312	0.368721	0.00542463	0.216559	0.0689888	0.121283	0.00619381	0.016446	0.00217449	0.0059515
0.00320479	0.0273081	0.00942707	0.0942247	0.00985299	0.521505	0.160744	0.0273025	0.00829866	0.00437693	0.00892352	0.124832
0.015669	0.00455337	0.00659134	0.00600816	0.00776222	0.692077	0.234532	0.0108348	0.00295942	0.00735625	0.00718389	0.00447185
0.00408468	0.00764699	0.00958199	0.0527959	0.00650467	0.689732	0.133008	0.077567	0.00271239	0.00551939	0.00619429	0.00465311
0.000954195	0.113525	0.0337507	0.103305	0.0226619	0.198142	0.0746131	0.133752	0.00674117	0.0416469	0.00850872	0.262398
0.12051	0.00424577	0.00427322	0.0192215	0.00279217	0.283311	0.00663193	0.0119158	0.02006	0.0393598	0.244312	0.243367
0.0465007	0.00368853	0.00268634	0.0191304	0.00910331	0.590451	0.0878847	0.0822511	0.00469069	0.0344693	0.112655	0.0064893
0.0438347	0.00381469	0.00281792	0.0233933	0.0138368	0.725914	0.0218573	0.0733745	0.00212738	0.045989	0.0178896	0.0251506
0.30291	0.00273219	0.00175577	0.00417755	0.000424046	0.321651	0.00407414	0.0396282	0.057157	0.144925	0.0281412	0.0924235
0.226311	0.00697658	0.000854787	0.0114275	0.00102359	0.160691	0.00364233	0.0420581	0.103091	0.0535468	0.0749875	0.31539
0.185006	0.000785787	0.00560813	0.016381	0.0472909	0.537257	0.00295422	0.062548	0.0453104	0.0373645	0.0474817	0.0120124
0.00414909	0.00450347	0.00371914	0.0126	0.0198147	0.757209	0.079317	0.0569861	0.00214052	0.0477699	0.0040893	0.00770155
0.00475796	0.00308359	0.00320752	0.0200282	0.0423452	0.764791	0.0719545	0.0714714	0.00213756	0.00640209	0.00497939	0.00484139
0.0180455	0.00661515	0.00362672	0.121406	0.0191461	0.59172	0.0748651	0.0893092	0.023846	0.0193839	0.0124747	0.0195619
0.0113359	0.0105522	0.00717043	0.0407634	0.0550612	0.491245	0.103263	0.146861	0.00560256	0.0217661	0.0918665	0.0145132
0.242117	0.00269551	0.0011404	0.163592	0.0587787	0.34658	0.0116166	0.00290305	0.0073201	0.110432	0.0439594	0.00886521
0.145003	0.00276813	0.00326144	0.0109141	0.00788147	0.76714	0.0103759	0.00901936	0.0220613	0.0109794	0.00519633	0.00539904
0.0311191	0.000723849	0.00955283	0.0758603	0.00572992	0.412862	0.0180762	0.0240628	0.0352569	0.0690086	0.227639	0.0901083
0.00449129	0.0705997	0.0240738	0.0264461	0.00438987	0.721615	0.0100457	0.0185258	0.0443677	0.0392654	0.00651895	0.029661
0.0114262	0.0492116	0.00440567	0.00471709	0.00171098	0.0279851	0.00401165	0.0577401	0.203222	0.0294785	0.00787972	0.598211
0.297561	0.00279715	0.0024868	0.0564963	0.0147888	0.384245	0.0199284	0.0683556	0.0337176	0.0324424	0.0578132	0.0293683
0.00637187	0.00435626	0.00424217	0.0342479	0.014468	0.727563	0.0224076	0.0903136	0.00185091	0.0056551	0.013336	0.0751872
0.0107686	0.0108973	0.00233109	0.120426	0.0495253	0.53868	0.082837	0.116471	0.00828335	0.0128616	0.00609034	0.0408275
0.00519843	0.10032	0.00626505	0.465705	0.00271537	0.170196	0.00644455	0.0978154	0.0120128	0.030739	0.00551073	0.097078
0.00420616	0.00384067	0.00402721	0.024843	0.0419362	0.811367	0.0296717	0.0571832	0.0014744	0.00479757	0.00352176	0.013131
0.0033428	0.00148794	0.00412238	0.164385	0.0379294	0.630356	0.0495951	0.096883	0.00181712	0.00195571	0.00386567	0.0042601
0.275079	0.00189297	0.00153445	0.0164391	0.014112	0.492378	0.0286857	0.0543875	0.00414898	0.0380205	0.0608637	0.0124583
0.227076	0.00917666	0.00795539	0.0211574	0.00188536	0.136816	0.0123227	0.0567542	0.0707323	0.0533449	0.187638	0.215141
0.0149521	0.00288166	0.00436393	0.0200861	0.0313909	0.805901	0.0191777	0.073263	0.00731178	0.00660409	0.00667249	0.00739571
0.00815948	0.00295528	0.00468986	0.00556526	0.0413727	0.638871	0.0109596	0.0868445	0.00200272	0.188696	0.00628186	0.00360155
0.00441417	0.00337555	0.00329032	0.0646472	0.0317647	0.663205	0.130807	0.0825082	0.00200033	0.00335609	0.00459774	0.00603306
0.00565258	0.0035882	0.00547813	0.00429608	0.0362494	0.795272	0.11189	0.015746	0.00209944	0.00851269	0.00510404	0.00611136
0.00670892	0.00224771	0.0034321	0.0566748	0.135544	0.767519	0.00813954	0.00305016	0.000574281	0.0034021	0.00488186	0.00782579
0.004302	0.00390171	0.00365783	0.0182601	0.00997162	0.764879	0.0835627	0.0909534	0.00285956	0.00660616	0.00539048	0.00565519
0.00436652	0.00347272	0.00383951	0.00639609	0.0344257	0.808136	0.0394905	0.0739439	0.00211424	0.0115879	0.00566439	0.00656229
0.0209125	0.00535015	0.00999154	0.0184485	0.0160594	0.544171	0.0801324	0.0838696	0.00302384	0.142163	0.0709643	0.00491351
0.0102455	0.0153358	0.00504658	0.174417	0.0102436	0.369656	0.0258571	0.165275	0.00788041	0.0253667	0.00801977	0.182656
0.0103083	0.00623043	0.0065865	0.0234444	0.242274	0.559524	0.0260091	0.0491185	0.00466976	0.0231725	0.00701334	0.0416484
0.00604035	0.00861869	0.00186182	0.10185	0.0344773	0.639635	0.0584996	0.124435	0.00309885	0.0101787	0.00207543	0.00922927
0.0926998	0.00230568	0.00113311	0.0261473	0.0396551	0.643881	0.0800257	0.0856271	0.00175985	0.0174434	0.00395094	0.00537069
0.10506	0.0111177	0.00272047	0.0519896	0.00630773	0.333754	0.0334245	0.10585	0.0385508	0.165105	0.0469066	0.0992135
0.00502307	0.00376693	0.00536458	0.00392248	0.00679357	0.7574	0.0252766	0.00915872	0.0023714	0.170426	0.00526334	0.00523352
0.0536482	0.00301558	0.00270781	0.00887931	0.0145734	0.661552	0.123049	0.0601076	0.00282042	0.0605264	0.00465526	0.00446491
0.00552896	0.00697947	0.0321617	0.00840378	0.0962738	0.744419	0.0270723	0.0574194	0.00208218	0.00941813	0.0039392	0.00630212
0.00147047	0.0127989	0.00291478	0.529134	0.0280852	0.172363	0.148462	0.0927494	0.00203517	0.00252045	0.00100878	0.00645836
0.00426744	0.00570487	0.00388163	0.126977	0.0274031	0.678766	0.0364253	0.102154	0.00240184	0.00287044	0.00360201	0.00554663
0.0315187	0.00429403	0.0079328	0.021161	0.00078204	0.525197	0.00590418	0.0112162	0.0301307	0.0119128	0.065248	0.284703
0.00322201	0.00298102	0.00388204	0.0227274	0.0234551	0.786865	0.0714259	0.0679365	0.00216299	0.00446055	0.00564514	0.0052364
0.00535776	0.00363098	0.00423482	0.00622878	0.0443722	0.77846	0.100778	0.0110919	0.00199877	0.0319612	0.00553695	0.00634853
0.00303789	0.00194166	0.00433065	0.0124023	0.0104859	0.890911	0.00752467	0.0389679	0.00453587	0.0150432	0.00646644	0.00435267
0.0073493	0.00291621	0.00490904	0.0813057	0.0164189	0.756671	0.0204091	0.0814081	0.00394989	0.00730983	0.0119109	0.00544246
0.346838	0.00187416	0.00267682	0.0180365	0.0101101	0.45469	0.0156138	0.0541345	0.0219842	0.0164572	0.0493238	0.00826053
0.00864117	0.00142499	0.00275264	0.0403104	0.0164804	0.585528	0.114677	0.050624	0.000627422	0.171846	0.00368813	0.00340031
0.0698474	0.00182398	0.00726992	0.0305417	0.031574	0.663634	0.0165614	0.0200088	0.0539541	0.0141917	0.0655475	0.0250455
0.00693684	0.00441038	0.0043984	0.148107	0.0158092	0.673406	0.0251985	0.0901486	0.00249174	0.00613536	0.00460393	0.0183541
0.00453768	0.00323295	0.00361987	0.0769088	0.0301681	0.76465	0.0186319	0.0771473	0.00226069	0.00470332	0.00534435	0.00879526
0.17861	0.00672665	0.00272247	0.0622895	0.0238889	0.557661	0.0244042	0.0625361	0.0307359	0.00785753	0.0306473	0.0119198
0.037076	0.0492524	0.00562904	0.108906	0.00369996	0.375121	0.0228804	0.158279	0.0350668	0.063668	0.0216709	0.118751
0.0273355	0.00239421	0.00220776	0.00567074	0.0191354	0.790331	0.0301765	0.0647274	0.00210178	0.042149	0.00660681	0.00716359
0.00415377	0.00426431	0.00389922	0.0214276	0.104092	0.80332	0.019289	0.0143803	0.00200768	0.00912927	0.00432427	0.00971238
0.0309469	0.0695249	0.0310166	0.121265	0.00167313	0.0654011	0.0201605	0.0751659	0.165178	0.0670108	0.0308232	0.321834
0.0445534	0.00794424	0.00287548	0.0633811	0.0135413	0.568067	0.0453746	0.151946	0.00395118	0.0344204	0.0126643	0.0512804
0.00440988	0.00470574	0.00431771	0.0358543	0.0514414	0.832016	0.0118859	0.033485	0.00244561	0.00633586	0.00520265	0.00789966
0.13557	0.0157692	0.00335406	0.0390445	0.00754084	0.461225	0.0342907	0.085585	0.063594	0.0907957	0.044563	0.0186682
0.0123011	0.0834902	0.00498139	0.117333	0.00220612	0.298699	0.0216418	0.110958	0.0337614	0.0418582	0.0163744	0.256396
0.00839656	0.0239244	0.0410138	0.0407613	0.00831605	0.53234	0.0311395	0.20514	0.0629897	0.0266102	0.0101673	0.00920193
0.0132379	0.00360261	0.00263364	0.0507147	0.122098	0.556451	0.105884	0.102435	0.0051797	0.00641737	0.0197453	0.0116012
0.00467693	0.00374078	0.00286596	0.0232793	0.0364008	0.789209	0.0790491	0.0441089	0.00165224	0.00569456	0.0033373	0.00598479
0.00383963	0.0042137	0.00472456	0.0248351	0.0182725	0.760738	0.06852	0.0798491	0.00184868	0.0212581	0.00414222	0.00775827
0.117627	0.00324615	0.00227752	0.0336902	0.00679277	0.476884	0.0191696	0.139539	0.00732506	0.0605536	0.0199953	0.1129
0.014725	0.0158989	0.00417068	0.152261	0.00532682	0.553118	0.0394055	0.0874463	0.0212745	0.0193871	0.0126365	0.0743502
0.303426	0.00183031	0.0018233	0.0265644	0.00922913	0.412841	0.0268297	0.119303	0.00456061	0.0560475	0.0242853	0.01326
0.0112875	0.0105538	0.00409933	0.128709	0.00546224	0.603203	0.0237932	0.100856	0.0404065	0.0157917	0.00747302	0.0483647
0.00434411	0.0085451	0.00340586	0.0874435	0.012021	0.697866	0.0780369	0.0883425	0.00190096	0.0058336	0.00416899	0.00809111
0.0144101	0.0342019	0.00628601	0.0471401	0.00878691	0.541294	0.0221802	0.149816	0.0203122	0.0661541	0.00571523	0.0837028
0.00643189	0.00284172	0.0772191	0.0176585	0.00260058	0.620224	0.0129729	0.00644004	0.00307735	0.165028	0.00606609	0.0794392
0.149565	0.0151914	0.111155	0.00819652	0.0104195	0.497162	0.0304148	0.012244	0.0676852	0.0400154	0.0137927	0.044158
0.00114302	0.0901142	0.00321512	0.395241	0.033475	0.216026	0.147078	0.0990025	0.00217142	0.00212531	0.00111518	0.00929283
0.00632527	0.0112661	0.00623145	0.0724087	0.00603129	0.692547	0.0389274	0.0952576	0.00266277	0.0120763	0.00494276	0.0513231
0.438698	0.000976417	0.00234846	0.0152449	0.0221752	0.336253	0.0147182	0.0719618	0.00904364	0.0352617	0.0485632	0.00475502
0.00574384	0.00218388	0.00391622	0.0109561	0.0566419	0.848712	0.012522	0.0397399	0.00168278	0.00547039	0.00581171	0.00661886
0.00544918	0.00230418	0.005189	0.0216608	0.00992224	0.748495	0.0223178	0.156143	0.00556373	0.00710897	0.00853013	0.00731598
0.0700953	0.000312656	0.00301353	0.0190228	0.0393929	0.731466	0.0459288	0.062516	0.00203428	0.0156815	0.00615616	0.00437971
0.017998	0.00184453	0.0423605	0.0116577	0.00237417	0.554823	0.00340221	0.0572597	0.00870505	0.279303	0.00675771	0.0135146
0.0159811	0.0376011	0.0344584	0.115246	0.0111749	0.482474	0.0205234	0.160297	0.0153059	0.0929903	0.00700865	0.00693923
0.196511	0.00177448	0.00287305	0.0442097	0.00813433	0.55072	0.0646548	0.0694421	0.0237078	0.0147487	0.0190446	0.00418043
0.0253928	0.0018609	0.00241089	0.0367642	0.0420451	0.657819	0.0975086	0.110617	0.000401723	0.0103377	0.00805337	0.00678848
0.0165325	0.0316686	0.00545553	0.175081	0.0134312	0.382763	0.0302965	0.13654	0.0138475	0.0348016	0.0124314	0.147151
0.108878	0.0013747	0.00292423	0.0400713	0.0171307	0.533535	0.0350608	0.0625837	0.00222139	0.0407673	0.111726	0.0437274
0.00258338	0.150837	0.00599043	0.14585	0.00524551	0.221361	0.0269609	0.0843013	0.00464394	0.0213233	0.00350439	0.327399
0.0509619	0.00102678	0.00463853	0.0374211	0.0561382	0.625322	0.0175668	0.105919	0.00200019	0.0252495	0.0707193	0.00303686
0.0277819	0.00121982	0.00118107	0.0394544	0.130179	0.602467	0.0606059	0.0347466	0.00105509	0.0134193	0.0774757	0.0104133
0.102127	0.0172063	0.0021019	0.0113565	0.0026521	0.230132	0.0114954	0.0644958	0.0655793	0.0878129	0.129667	0.275373
0.00931105	0.0670042	0.00463872	0.0823813	0.00401087	0.584696	0.0218476	0.0840979	0.0083309	0.0393274	0.0449674	0.0493866
0.0207461	0.00433869	0.00280537	0.00896567	0.00750515	0.656144	0.0548241	0.0974406	0.0028916	0.0391499	0.0289278	0.0762608
0.0313149	0.00517249	0.00257519	0.00857004	0.0104604	0.627897	0.0618577	0.0895865	0.00146361	0.130196	0.00706789	0.0238389
0.072779	0.00336524	0.00238795	0.0112727	0.0364006	0.73772	0.0153828	0.0675896	0.00571142	0.0131459	0.0246709	0.00957435
0.0182004	0.0413745	0.00524927	0.120769	0.00542133	0.562016	0.0285961	0.06326	0.0306433	0.0302136	0.0182266	0.0760298
0.00244905	0.100056	0.00593422	0.200511	0.00332212	0.361592	0.00857941	0.0435435	0.0155705	0.00666238	0.0061416	0.245639
0.0823441	0.00462361	0.00229977	0.0370363	0.0145304	0.652867	0.0380927	0.0790452	0.00223148	0.0587424	0.0152858	0.0129011
0.370282	0.00369537	0.00386343	0.00751175	0.00246142	0.360055	0.0093716	0.0446756	0.0306708	0.088291	0.0313339	0.0477884
0.0183637	0.0180387	0.0547041	0.0170694	0.144768	0.341274	0.0259454	0.215728	0.0253866	0.0360562	0.0544724	0.0481937
0.00448836	0.00680524	0.0042069	0.0858734	0.0306351	0.657763	0.018894	0.0869207	0.0024863	0.0236866	0.00427037	0.0739699
0.00295982	0.0904307	0.0037294	0.145398	0.0220408	0.478184	0.0147136	0.076921	0.00495019	0.0201908	0.00226589	0.138215
0.0121681	0.00121209	0.00258515	0.09101	0.0213153	0.70434	0.0663211	0.067235	0.00285915	0.0100013	0.0139396	0.00701289
0.0188565	0.0103432	0.0940243	0.0618562	0.0219623	0.38645	0.0544098	0.261312	0.0224504	0.0504435	0.0113146	0.00657667
0.0453562	0.0028207	0.00331387	0.0178951	0.015955	0.77581	0.026013	0.0763101	0.00478883	0.0146173	0.00657355	0.0105459
0.00935375	0.0640321	0.00777557	0.0437431	0.00422771	0.429598	0.0131262	0.0528722	0.0387707	0.0261185	0.0248992	0.285482
0.119088	0.019625	0.00230723	0.0799831	0.00969386	0.375425	0.0441569	0.142837	0.0352194	0.0750776	0.020891	0.0756954
0.0186937	0.0670508	0.00499004	0.072241	0.00290644	0.364085	0.0187447	0.0706381	0.026437	0.0305789	0.0166814	0.306953
0.379852	0.00213164	0.00131395	0.0256391	0.0109282	0.385442	0.0197735	0.0899231	0.0131388	0.0211479	0.0399955	0.0107134
0.0101724	0.0387766	0.0108358	0.0315193	0.0887409	0.534268	0.0498857	0.159927	0.00447542	0.0270762	0.038397	0.00592599
0.00659902	0.00203852	0.0350211	0.0657204	0.0111855	0.674813	0.0789208	0.108067	0.000740313	0.00751364	0.00574988	0.00363022
0.0691404	0.0120924	0.00246551	0.0110461	0.00163204	0.145804	0.00291079	0.0239132	0.0758848	0.0571639	0.0469634	0.550983
0.0476214	0.00382365	0.00195506	0.00665785	0.0323966	0.678706	0.0414156	0.096964	0.00022869	0.0690689	0.0152244	0.00593748
0.0154001	0.0147498	0.00558194	0.0339064	0.00763834	0.455248	0.0268798	0.157125	0.0103207	0.052797	0.015252	0.205101
0.00599303	0.0318726	0.00597868	0.0790058	0.0101998	0.444807	0.00890915	0.0954808	0.0136707	0.0192148	0.0123818	0.272486
0.00226545	0.109658	0.00725932	0.450957	0.00160545	0.215651	0.00544864	0.0654537	0.0209391	0.0257356	0.0101506	0.0848754
0.141496	0.00511241	0.00159867	0.0147605	0.00390393	0.277695	0.00881502	0.115814	0.0428882	0.114029	0.0468891	0.226999
0.0323341	0.00232488	0.00235802	0.0227778	0.00854507	0.773842	0.0404472	0.0852465	0.00240099	0.015406	0.006229	0.00808816
0.00616687	0.00847082	0.0198293	0.0495658	0.0886328	0.44687	0.013305	0.0606453	0.00110403	0.0255738	0.0532624	0.226574
0.042019	0.00349887	0.00228476	0.0339331	0.0297971	0.747883	0.0662266	0.0565822	0.00156538	0.0072911	0.00391626	0.00500264
0.00526203	0.00342692	0.00477105	0.00420579	0.0196008	0.862224	0.011257	0.0179677	0.0019358	0.0592773	0.00382449	0.0062467
0.00441715	0.00245916	0.00290172	0.0101687	0.077819	0.796458	0.0752915	0.00711689	0.00195142	0.00944599	0.00586254	0.00610769
0.0046042	0.0150106	0.00385022	0.0172442	0.00829011	0.62811	0.0601919	0.110681	0.00259511	0.126802	0.00360898	0.0190121
0.00448166	0.00476208	0.0026756	0.0408138	0.028141	0.714724	0.0653281	0.0920058	0.00103028	0.0348804	0.00429986	0.00685721
0.0342359	0.00171344	0.00149418	0.0208766	0.0507297	0.683608	0.113704	0.0527433	0.00161827	0.0280528	0.00309996	0.00812438
0.0146091	0.0507327	0.00265042	0.0924596	0.0591178	0.281146	0.0309598	0.110847	0.0177257	0.17031	0.012337	0.157105
0.109773	0.00163713	0.00189151	0.0271185	0.0265107	0.643483	0.0354047	0.0979311	0.00263776	0.00839041	0.0308464	0.0143752
0.0188889	0.0344674	0.00464352	0.097508	0.00402392	0.575145	0.0440169	0.073802	0.0234477	0.0218716	0.0155352	0.0866502
0.0284147	0.00684075	0.00309718	0.0313297	0.0138205	0.629234	0.0698717	0.120801	0.00252008	0.0233423	0.0203963	0.0503319
0.00465175	0.00327708	0.00348051	0.0137845	0.0393515	0.756156	0.0615612	0.0775437	0.00156014	0.00623782	0.0124628	0.0199326
0.0103275	0.00387671	0.0152071	0.10647	0.032768	0.42082	0.0615055	0.215924	0.0290595	0.0299013	0.000751026	0.0733893
0.00661182	0.00167447	0.00506313	0.0210552	0.0164634	0.809825	0.0499314	0.0677936	0.00229737	0.00791407	0.00586463	0.00550558
0.0063581	0.00281325	0.00381675	0.187817	0.0242464	0.660448	0.02476	0.0731772	0.00211715	0.00690572	0.00385619	0.00368494
0.00640364	0.0106593	0.0103126	0.00796361	0.00312802	0.0100307	0.00220786	0.00596002	0.0220479	0.00732972	0.011468	0.902489
0.00689162	0.00495603	0.213445	0.00269492	0.00617858	0.542935	0.0281639	0.00625857	0.00750565	0.169211	0.00693371	0.00482681
0.00696457	0.0035206	0.00292504	0.0021635	0.0310674	0.834269	0.0607686	0.0217657	0.00180123	0.0252602	0.00384043	0.00565396
0.0142993	0.0475954	0.00511899	0.051738	0.00132251	0.526939	0.0187814	0.0142615	0.033548	0.0143104	0.0726187	0.199467
0.0669985	0.00508356	0.00237657	0.079132	0.00767264	0.647168	0.0825598	0.062913	0.014884	0.0125262	0.0063217	0.0123642
0.00806676	0.0212966	0.00500145	0.123259	0.0175076	0.653279	0.038026	0.0664305	0.0186243	0.00821555	0.0124237	0.0278693
0.00750207	0.00332938	0.00333729	0.0196624	0.0994133	0.667904	0.012443	0.0336853	0.00212608	0.00411651	0.00908536	0.137396
0.588938	0.00335935	0.00238342	0.0038674	0.00278386	0.051194	0.00746451	0.0171886	0.0538866	0.0288553	0.182043	0.0580352
0.0031945	0.00227611	0.0120728	0.0047531	0.182137	0.4146	0.0154274	0.10002	0.00219156	0.213755	0.00943232	0.0401405
0.00331718	0.0640951	0.0590953	0.0606459	0.0177993	0.465969	0.153639	0.149008	0.00353717	0.0103566	0.00279368	0.00974363
0.00823619	0.15794	0.00105703	0.151977	0.00737543	0.37316	0.10797	0.13313	0.00234996	0.0486817	0.00133803	0.00678445
0.00947842	0.00204804	0.0025161	0.0157616	0.31603	0.448949	0.105147	0.0423205	0.000742324	0.0457652	0.00641425	0.00482773
0.0678586	6.92465e-05	0.0136778	0.0250773	0.00174468	0.376636	0.00235689	0.00556619	0.00183703	0.0780203	0.360921	0.0662345
0.00350986	0.0431797	0.0025898	0.0790169	0.0437994	0.683112	0.0669828	0.0537622	0.00204889	0.00961173	0.00308823	0.0092988
0.108556	0.00148767	0.00297928	0.0240898	0.00929636	0.440075	0.0899688	0.0945373	0.00821596	0.0238523	0.191584	0.00535764
0.0229662	0.00379833	0.00414365	0.0187618	0.0652943	0.769491	0.0269681	0.0106894	0.0180589	0.00915114	0.0442	0.00647722
0.00713777	0.00313881	0.00626386	0.00285977	0.0295543	0.641483	0.0108477	0.00952346	0.00284436	0.274704	0.00555669	0.00608666
0.00781774	0.00272149	0.00396078	0.00830369	0.0665396	0.820986	0.0563353	0.0160788	0.00228656	0.00408579	0.00566496	0.00521899
0.00626078	0.0212218	0.00503684	0.0254643	0.00747952	0.566194	0.0610827	0.0990499	0.00515634	0.0513575	0.00358091	0.148116
0.0188238	0.00112363	0.00497625	0.0647244	0.00575172	0.758538	0.0108595	0.0742011	0.00188941	0.0455951	0.0079977	0.00551892
0.0525062	0.00249597	0.00598632	0.00382542	0.0304936	0.659544	0.012522	0.00820296	0.00276673	0.210401	0.0058723	0.00538378
0.0135922	0.00415102	0.00253755	0.0355468	0.022873	0.701646	0.0574698	0.0931001	0.0026177	0.0509038	0.0062595	0.00930281
0.00435495	0.00194342	0.00730957	0.0995642	0.0494126	0.715231	0.0417097	0.0654396	0.0023842	0.00268486	0.00549548	0.00447001
0.0109093	0.00372625	0.0042071	0.0425533	0.035813	0.546695	0.0143327	0.0830257	0.00444318	0.00930619	0.238656	0.00633278
0.0124868	0.0017487	0.00527072	0.0134827	0.00467121	0.827457	0.00416541	0.0302459	0.0028133	0.0809055	0.0122933	0.00445959
0.0098103	0.00185246	0.00385484	0.00874563	0.0303619	0.829728	0.0182713	0.0740082	0.00221677	0.00795516	0.00733039	0.00586515
0.00357878	0.0639837	0.0210484	0.120296	0.00350391	0.307546	0.0060136	0.11572	0.0117867	0.0231011	0.00555036	0.317872
0.00144572	0.0298697	0.0496249	0.107451	0.386543	0.0562768	0.0989356	0.087209	0.0185594	0.0735847	0.0417439	0.0487565
0.305362	0.000659445	0.00334492	0.00565176	0.00967901	0.513153	0.00664677	0.0116996	0.0162748	0.106558	0.0164869	0.00448318
0.461876	0.00109989	0.00637503	0.0117683	0.00217958	0.441614	0.0115404	0.00976086	0.003437	0.0109523	0.0332785	0.00611857
0.00520477	0.00295526	0.00403769	0.00626615	0.0978032	0.815365	0.0347736	0.0117502	0.00209904	0.00807104	0.00570112	0.00597336
0.00608354	0.00307507	0.00500919	0.0399292	0.0211703	0.747925	0.0396485	0.0707835	0.0024818	0.0462624	0.00758043	0.0100509
0.036753	0.0972094	0.0505454	0.00731073	0.000383112	0.0134159	0.00591883	0.151473	0.479338	0.100595	0.00425205	0.0528051
0.0047618	0.00292592	0.00379194	0.0119742	0.0603394	0.823834	0.0236231	0.0509508	0.00195095	0.00579148	0.00447286	0.00558363
0.00334164	0.00192046	0.0119593	0.0306143	0.0475185	0.805273	0.0172794	0.0646359	0.00218508	0.0028797	0.00663222	0.0057608
0.0494939	0.000413305	0.00846513	0.229161	0.00398154	0.265507	0.181056	0.0318626	0.00191778	0.00588978	0.216961	0.00529118
0.0222422	0.00293163	0.00235469	0.00956659	0.00950356	0.593303	0.0214122	0.102515	0.0024752	0.0286602	0.0355686	0.169468
0.159527	0.00127879	0.00323921	0.0258561	0.0750055	0.387659	0.085549	0.0779479	0.00726244	0.0486593	0.118803	0.0092129
0.00804649	0.00277049	0.00357679	0.00822107	0.030949	0.858335	0.0094922	0.0505711	0.00194731	0.0157582	0.00484508	0.0054872
0.00593786	0.00237659	0.00332182	0.0122345	0.0192301	0.8233	0.0180341	0.0940058	0.00238827	0.00649748	0.00608998	0.00658317
0.00367498	0.00243936	0.00451262	0.00709116	0.0154336	0.862274	0.0367246	0.0145805	0.00201037	0.0370613	0.00898245	0.00521522
0.00747496	0.00193723	0.00385241	0.0291686	0.0143535	0.83864	0.0371262	0.051197	0.00204985	0.00446647	0.00586007	0.0038736
0.00555724	0.00455507	0.00579567	0.00682376	0.0139028	0.763254	0.0569758	0.102193	0.00211735	0.027863	0.00567215	0.00529051
0.0148754	0.0104119	0.00444419	0.0237704	0.0119249	0.379681	0.0127659	0.0299496	0.0327693	0.0271757	0.0372863	0.414945
0.00576235	0.00438311	0.00351693	0.0675032	0.0745083	0.717768	0.0398256	0.0567153	0.00240829	0.00534584	0.00329973	0.0189635
0.35457	0.000908311	0.00531066	0.0123315	0.00343347	0.554345	0.0148154	0.0138821	0.0209697	0.00878748	0.00723879	0.00340813
0.0117679	0.00251333	0.00402181	0.00808719	0.0360489	0.835905	0.0107414	0.0708043	0.00195184	0.00790882	0.004719	0.00553055
0.550343	0.00427532	0.00349339	0.0155194	0.00665155	0.270437	0.0110568	0.0124561	0.0380117	0.0331652	0.0498508	0.00473982
0.00751157	0.00528718	0.00715617	0.0541903	0.00724202	0.733849	0.00632143	0.00567751	0.0292111	0.00773328	0.0594158	0.0764044
0.021002	0.00181943	0.00188038	0.028656	0.0287433	0.732684	0.082232	0.0777571	0.00211762	0.00736245	0.0093979	0.00634792
0.020097	0.0285285	0.0118503	0.144009	0.00329777	0.347906	0.0270782	0.188853	0.0174564	0.114098	0.0168963	0.0799309
0.0153749	0.00242742	0.00221845	0.0130377	0.047975	0.648616	0.0456337	0.096571	0.00113814	0.0772113	0.0246657	0.0251309
0.00408339	0.00432655	0.00675308	0.00770941	0.016897	0.739087	0.142972	0.0583001	0.00268879	0.00614186	0.00542953	0.00561046
0.00485848	0.00271791	0.00400309	0.0603015	0.0338394	0.789514	0.0343911	0.0509646	0.00213292	0.00833047	0.00421653	0.00472994
0.00548521	0.00282792	0.00457179	0.0206132	0.0535356	0.827731	0.0324779	0.0337996	0.00213808	0.0061724	0.00532253	0.00532485
0.0653782	0.00456997	0.0058072	0.0495121	0.0070491	0.684984	0.0161106	0.0847421	0.0122737	0.0550101	0.0101219	0.00444154
0.0616143	0.0577237	0.00270217	0.220311	0.0198442	0.364942	0.0171868	0.138037	0.00282197	0.0130343	0.00185474	0.0999283
0.706878	0.00267753	0.0034295	0.00397107	0.0049526	0.239168	0.00577223	0.00819093	0.00261929	0.00570399	0.0128967	0.00374063
0.00771732	0.0452717	0.00434624	0.107501	0.00660447	0.478185	0.043284	0.0934478	0.0164119	0.0650836	0.011431	0.120716
0.222624	0.0017052	0.000684912	0.0462397	0.162269	0.251155	0.159292	0.107192	0.0146723	0.0168183	0.0146278	0.00271933
0.0759695	0.0729158	0.00916139	0.0300635	0.00431345	0.304193	0.030399	0.115776	0.00462537	0.010106	0.338988	0.00348871
0.0218128	0.0199151	0.00573406	0.0969252	0.00633375	0.632948	0.018646	0.0746425	0.00960933	0.00853607	0.0927425	0.0121549
0.0162546	0.0230704	0.00860082	0.0265845	0.00382316	0.248052	0.00698519	0.0722286	0.0936943	0.0436749	0.0262591	0.430772
0.00404349	0.00494945	0.00515137	0.00746566	0.0471067	0.788614	0.0223618	0.0778957	0.0021559	0.0289447	0.0039734	0.00733833
0.00610327	0.0063215	0.00566589	0.0530392	0.013393	0.625664	0.0357144	0.0460417	0.0160898	0.125645	0.0265975	0.0397244
0.127419	0.00907884	0.00441072	0.0239658	0.000277531	0.185304	0.0110018	0.07117	0.0584194	0.053611	0.0988089	0.356534
0.00430418	0.00350045	0.336132	0.00260285	0.0518198	0.292784	0.152193	0.090376	0.0030069	0.0571052	0.00138346	0.00479269
0.141305	0.0192334	0.0020249	0.0217679	0.0362222	0.493955	0.058435	0.0544653	0.0206778	0.102301	0.0435302	0.00608254
0.0044055	0.0653938	0.0169129	0.0768178	0.00796142	0.208083	0.0125204	0.051641	0.073172	0.0177779	0.0178797	0.447435
0.354339	0.00197019	0.00266016	0.00555014	0.0140677	0.154653	0.00946575	0.014973	0.0556059	0.281485	0.0937536	0.0114767
0.089577	0.0426798	0.00285123	0.0656303	0.00359447	0.458835	0.0354909	0.07156	0.02974	0.071749	0.0395636	0.0887286
0.280413	0.00757597	0.0129538	0.0127138	0.00307616	0.0594624	0.00724154	0.0152772	0.267394	0.0149047	0.275403	0.0435848
0.00414617	0.00406079	0.00414882	0.00863537	0.0199411	0.793649	0.0914057	0.0218918	0.00221368	0.0386107	0.00494995	0.00634653
0.00613076	0.00339508	0.00512469	0.00597875	0.14931	0.7877	0.0153385	0.00858525	0.00193953	0.00615869	0.00470245	0.00563631
0.00511049	0.00340308	0.00374237	0.00626472	0.0157168	0.772703	0.128161	0.0454743	0.00241095	0.00610573	0.00533631	0.00557184
0.00638628	0.00197612	0.00378383	0.0109389	0.0817887	0.830106	0.0195529	0.0269027	0.00188463	0.00506485	0.0052546	0.00636024
0.00717093	0.00294654	0.0043139	0.0464919	0.0148445	0.685033	0.106352	0.081954	0.00153558	0.0395075	0.00477135	0.00507955
0.13864	0.00413212	0.00562371	0.014083	0.00523184	0.595173	0.0152736	0.108051	0.0481707	0.0513279	0.0113637	0.00292977
0.00263259	0.0240728	0.00530184	0.30937	0.00801841	0.324873	0.16222	0.0830029	0.0101507	0.00516558	0.0267122	0.0384804
0.641812	0.00318837	0.00618711	0.00275453	0.00427956	0.0166641	0.00214334	0.00468256	0.0374876	0.0328921	0.225281	0.0226277
0.00364153	0.00340321	0.00419229	0.00378265	0.00481821	0.640135	0.0992221	0.0750386	0.002598	0.0149625	0.00378216	0.144424
0.00724366	0.0032328	0.00325109	0.0102873	0.047048	0.71371	0.0688333	0.0495253	0.00271193	0.0122879	0.00466198	0.0772069
0.0930868	0.00274622	0.00338635	0.0469822	0.0136174	0.705344	0.0327463	0.0702528	0.00224382	0.00772633	0.0101934	0.011674
0.00507705	0.027549	0.0107837	0.0347951	0.0194114	0.527287	0.0150357	0.0797355	0.0111811	0.0752719	0.0114024	0.182471
0.00432242	0.0027361	0.0365241	0.0354604	0.0381779	0.689474	0.0908121	0.0774441	0.0021705	0.0122526	0.00403555	0.00659008
0.00429742	0.00301211	0.00453004	0.0234668	0.0200504	0.844514	0.017048	0.0575529	0.0020646	0.00562119	0.00457144	0.0132713
0.00277926	0.0385819	0.0035521	0.0668807	0.00527213	0.51874	0.0322229	0.0920889	0.00372765	0.0791452	0.00342637	0.153583
0.00701799	0.00159932	0.00485035	0.0061987	0.0676629	0.782569	0.0610621	0.0198188	0.00116461	0.0376904	0.00436588	0.00600047
0.00234058	0.183151	0.00788155	0.212611	0.00571443	0.372574	0.0159089	0.0225805	0.0138595	0.0153923	0.00603238	0.141954
0.0019971	0.0421643	0.00361744	0.500881	0.00368406	0.25468	0.0627176	0.110285	0.00352161	0.00419409	0.00142469	0.0108328
0.299929	0.00605462	0.0834792	0.00997183	0.0751845	0.15657	0.00656717	0.0783898	0.0686398	0.0259708	0.0563522	0.132891
0.0466912	0.0189643	0.0124012	0.107573	0.00669192	0.206657	0.0589729	0.0591425	0.0118912	0.0558817	0.240985	0.174148
0.00280997	0.00575213	0.0153604	0.112878	0.00414077	0.527725	0.00490398	0.0120514	0.143296	0.00394923	0.0103818	0.156751
0.00678914	0.00424762	0.00510861	0.00332332	0.07961	0.740598	0.0096544	0.0164888	0.00231873	0.122301	0.00438011	0.00518066
0.00614544	0.00463796	0.00742235	0.00397909	0.162323	0.561103	0.0771772	0.00583398	0.00309568	0.158123	0.00635957	0.0038004
0.00468782	0.00205827	0.00565323	0.0092232	0.0344732	0.775388	0.0439749	0.050158	0.0020703	0.0041694	0.00430951	0.0638342
0.26248	0.00123366	0.0148141	0.0281753	0.00286377	0.57999	0.0064267	0.00976706	0.00321263	0.0803789	0.00906378	0.00159413
0.00649654	0.0026121	0.00396972	0.0106899	0.117981	0.821633	0.00965492	0.00826953	0.00187978	0.00373567	0.00648456	0.006593
0.0122287	0.0016344	0.00301853	0.0234465	0.0330901	0.641282	0.0209942	0.102877	0.00209551	0.00536827	0.0146844	0.139281
0.000842044	0.0476988	0.07814	0.140777	0.0563866	0.24541	0.0645311	0.0412676	0.0311198	0.0233751	0.00672492	0.263727
0.053549	0.00105133	0.0726487	0.133751	0.001788	0.603449	0.0290288	0.0204243	0.00192485	0.0341339	0.028214	0.0200365

## Sheet: E02_A_Peroxisome
NN outputs for markers (Peroxisome)
Cytosol	ER	Golgi	Lysosome	Mitochondria	Nucleus	Peroxisome	PM	Endosome	LD	Protein-Complex	Translation
0.00489862	0.000416552	0.000797362	0.0389258	0.364977	0.0230855	0.530983	0.0262757	0.00262335	0.00198639	0.00419387	0.000836445
0.00765263	0.0116075	0.00370607	0.0422635	0.260281	0.00866852	0.621064	0.0314473	0.00154676	0.0043493	0.00490083	0.00251232
0.0132635	0.0179126	0.00186148	0.123004	0.0326876	0.0095717	0.692815	0.0892251	0.00359767	0.0119074	0.00157834	0.00257552
0.00652547	0.0603377	0.0105939	0.0233682	0.142869	0.00697387	0.700503	0.0254535	0.00305615	0.0142882	0.00363809	0.00239253
0.0037534	0.0140818	0.00281959	0.0639243	0.208556	0.010897	0.588883	0.0864346	0.00300847	0.00856657	0.00591237	0.0031637
0.00501918	0.156995	0.00394023	0.0626806	0.127016	0.0084612	0.547318	0.0713523	0.00379421	0.0054784	0.00347478	0.00447021
0.00472527	0.0168669	0.00280142	0.143551	0.297782	0.00304193	0.494963	0.0242126	0.00214324	0.00405512	0.00252498	0.00333178
0.00384329	0.0358038	0.033512	0.162562	0.00994836	0.0426003	0.689899	0.00734503	0.00277185	0.00608194	0.0033205	0.00231181
0.229742	0.0123003	0.00309458	0.0808429	0.0430746	0.030162	0.318719	0.093363	0.0514016	0.0447654	0.068188	0.024346
0.00571004	0.0269402	0.00277156	0.064144	0.221775	0.0067453	0.598748	0.0574942	0.00263458	0.00653055	0.00283768	0.00366851
0.00507805	0.0233339	0.00502766	0.0883444	0.275752	0.00277279	0.57216	0.0143986	0.00234161	0.00460453	0.00286111	0.00332449
0.00535301	0.0295341	0.00260097	0.111512	0.126192	0.00512488	0.679199	0.026917	0.00267545	0.00474258	0.00230705	0.00384271
0.00452183	0.0441704	0.00342758	0.101345	0.23702	0.00337823	0.566576	0.0249693	0.00258128	0.00552412	0.00211986	0.00436563
0.00481742	0.0502204	0.00493087	0.0631075	0.128241	0.00739238	0.673041	0.0521894	0.00234404	0.00612845	0.00387062	0.00371698
0.00452312	0.10733	0.00518252	0.0484163	0.203905	0.00984527	0.566911	0.0351693	0.0031234	0.00854492	0.00287922	0.00416975
0.00459077	0.0347048	0.00337486	0.0673213	0.127698	0.0051147	0.709512	0.0248109	0.00291928	0.00486987	0.011714	0.00336932
0.00382659	0.0304348	0.00431085	0.0860905	0.166794	0.00420457	0.682911	0.00620608	0.00376822	0.00523906	0.00347047	0.00274396
0.00306417	0.086303	0.00309315	0.0679568	0.111647	0.011482	0.644763	0.0173768	0.00228591	0.0388931	0.00374879	0.009386
0.00462449	0.0460006	0.00287262	0.138009	0.195989	0.00629061	0.520789	0.0737307	0.00200104	0.00451115	0.00161065	0.00357003
0.00536859	0.0270523	0.00795248	0.15244	0.061051	0.00330121	0.724277	0.00749559	0.00228218	0.00408745	0.00128712	0.00340517
0.00581729	0.0456818	0.0022864	0.103086	0.180451	0.0113235	0.581772	0.0477512	0.00359616	0.0100034	0.00470801	0.00352385

## Sheet: E02_A_PM
NN outputs for markers (PM)
Cytosol	ER	Golgi	Lysosome	Mitochondria	Nucleus	Peroxisome	PM	Endosome	LD	Protein-Complex	Translation
0.00822122	0.332862	0.0492796	0.0158309	0.00380511	0.00647301	0.0386482	0.213844	0.100945	0.148779	0.0108813	0.070431
0.0645618	0.0921294	0.0126775	0.0137745	0.0363665	0.117301	0.137977	0.311567	0.0234624	0.160436	0.0236802	0.00606663
0.00225631	0.453284	0.0862789	0.0154612	0.0147756	0.0942572	0.0328216	0.25897	0.0170773	0.0172224	0.00131483	0.00628126
0.00199548	0.255505	0.00547845	0.293967	0.00679287	0.0305378	0.112171	0.165171	0.0110353	0.0470056	0.0541245	0.0162156
0.0217579	0.225327	0.021255	0.00471128	0.00851988	0.143894	0.0206542	0.32123	0.0663623	0.147762	0.00204247	0.0164844
0.00271624	0.482903	0.0389009	0.0528917	0.0130134	0.0508974	0.0159297	0.267716	0.0227411	0.0295713	0.00168861	0.0210301
0.00240666	0.519374	0.0725823	0.0388815	0.00711305	0.0369655	0.0283682	0.244891	0.0202787	0.0200454	0.00187913	0.00721453
0.0494591	0.132443	0.0132512	0.0168295	0.0155718	0.0943465	0.103834	0.360031	0.0529488	0.125809	0.0138231	0.0216535
0.00293547	0.107118	0.0206329	0.00573524	0.0300294	0.062073	0.00642803	0.258147	0.00775207	0.0302144	0.32791	0.141025
0.000795002	0.293439	0.097677	0.0850447	0.00891319	0.0448049	0.0112307	0.269666	0.0131346	0.169676	0.00141724	0.00420162
0.00226921	0.438286	0.013451	0.00626636	0.0649494	0.109431	0.0427112	0.282507	0.00474755	0.0304513	0.000820771	0.00410929
0.00405888	0.29013	0.040142	0.00466053	0.0241541	0.0482173	0.225846	0.234817	0.00663549	0.10835	0.00698289	0.00600489
0.00295802	0.555322	0.0162529	0.197973	0.00647434	0.00628516	0.0150144	0.107236	0.0226018	0.0203612	0.00597589	0.0435445
0.0810507	0.094152	0.0107872	0.0677067	0.0290311	0.0695695	0.107597	0.260105	0.0621442	0.158887	0.0306693	0.0282997
0.00234401	0.350796	0.0445211	0.00382806	0.0482586	0.0759176	0.0521922	0.213753	0.0672094	0.0960152	0.00114805	0.044017
0.00302124	0.120896	0.0886327	0.205522	5.61532e-05	0.11963	0.00172352	0.332237	0.00813119	0.00804942	0.00418739	0.107914
0.00321768	0.493055	0.130407	0.00781588	0.00485864	0.00429195	0.0189996	0.168401	0.0506363	0.0862764	0.00258998	0.0294502
0.0033463	0.479936	0.0264855	0.299554	0.00381722	0.0111054	0.030425	0.0578975	0.0436549	0.00970604	0.00834	0.0257317
0.00719616	0.326494	0.0990684	0.00333475	0.0175686	0.0258196	0.129245	0.208774	0.110175	0.0558209	0.00433352	0.0121703
0.0015298	0.00221396	0.226831	0.0261893	0.0651171	0.238576	0.159283	0.174478	0.000801088	0.0748364	0.00956621	0.0205787
0.0016829	0.347871	0.0876556	0.0184311	0.0760587	0.0721229	0.0499903	0.28691	0.00878037	0.030417	0.00107297	0.0190067
0.00356747	0.442585	0.00811482	0.0359792	0.0349159	0.107942	0.0633532	0.192722	0.013041	0.0518199	0.00158435	0.044375
0.0020124	0.320787	0.228119	0.00780786	0.0219672	0.135736	0.0112191	0.222977	0.030171	0.014119	0.000310441	0.00477323
0.0354977	0.144037	0.00776428	0.0191762	0.056968	0.101081	0.107395	0.2845	0.0409718	0.176685	0.0101003	0.015824
0.00118813	0.0853164	0.429302	0.00295573	0.00704129	0.0022413	0.0829557	0.231184	0.00145279	0.155344	0.000588292	0.000431034
0.00238602	0.537556	0.0289567	0.0171581	0.0194195	0.110104	0.0245467	0.22597	0.00813912	0.0204939	0.00206185	0.00320915
0.00200766	0.464792	0.130931	0.0263684	0.00552992	0.0569063	0.0614114	0.226915	0.00653033	0.0122745	0.00134139	0.00499171
0.0026329	0.599588	0.0306353	0.00636411	0.0149288	0.00430023	0.120211	0.0726085	0.0117669	0.10341	0.0253553	0.00819916
0.00245409	0.523076	0.0516117	0.0713668	0.00929086	0.0224252	0.0288697	0.239895	0.0205892	0.019789	0.00164884	0.008983
0.00336704	0.397173	0.0465301	0.0241677	0.00576768	0.0411826	0.0423696	0.33955	0.0333106	0.056656	0.00211991	0.00780512
0.0028577	0.424663	0.00891232	0.415381	0.0126197	0.00768846	0.0312567	0.0584544	0.0114143	0.0099041	0.00234318	0.0145049
0.0140538	0.222187	0.0167021	0.0150636	0.0177273	0.108156	0.137366	0.351946	0.0225367	0.0764472	0.00225409	0.0155603
0.00147494	0.420403	0.212738	0.0266173	0.00877384	0.0360173	0.0401914	0.22081	0.0166355	0.0133133	0.000516444	0.00250893
0.00126627	0.131038	0.331269	0.00163861	0.0395549	0.0159881	0.0789158	0.162661	0.177863	0.0535753	0.00097013	0.00525975
0.00260025	0.357687	0.0628411	0.00497387	0.0415016	0.0960112	0.132725	0.162218	0.0381295	0.0404276	0.000988053	0.0598976
0.0291342	0.185197	0.0134217	0.015117	0.0282126	0.112004	0.0379765	0.378653	0.0676742	0.114103	0.00262862	0.0158783
0.00268116	0.529895	0.0864708	0.00626769	0.00990143	0.0150588	0.0832422	0.20489	0.00818159	0.0437841	0.00210343	0.0075229
0.309589	0.0189601	0.0195638	0.0605679	0.00892313	0.0955828	0.0514789	0.146022	0.0808719	0.130973	0.0641127	0.0133549
0.0435239	0.196128	0.0152043	0.0389172	0.00388654	0.0173442	0.0393798	0.145097	0.146555	0.148331	0.0360698	0.169563
0.00877318	0.209019	0.0100901	0.180959	0.0752806	0.04267	0.146446	0.229357	0.014619	0.0573442	0.00329019	0.0221522
0.00239665	0.0305944	0.014952	0.437877	0.21994	0.0051015	0.274037	0.00261949	0.00380307	0.00391678	0.00250512	0.00225647
0.0373629	0.301917	0.0146831	0.0242258	0.00531672	0.0365822	0.0245985	0.336125	0.0555002	0.142476	0.00501839	0.0161943
0.00842208	0.380221	0.058423	0.0578665	0.00744926	0.0208818	0.0496678	0.277234	0.0447382	0.0742197	0.000850985	0.0200262
0.00238994	0.53764	0.0897658	0.0296445	0.00889513	0.0101588	0.0755198	0.201638	0.00977009	0.0265191	0.00165194	0.00640736
0.0100634	0.190595	0.013355	0.00577601	0.0286144	0.114438	0.0855328	0.30256	0.0120601	0.229681	0.0012022	0.00612249
0.0428126	0.108597	0.00780046	0.0438793	0.021422	0.0758849	0.12408	0.207287	0.0569583	0.232573	0.0198334	0.0588714
0.0190421	0.215759	0.00812207	0.055103	0.0221065	0.0212408	0.289534	0.182678	0.0327209	0.0945036	0.0129111	0.0462789
0.121677	0.0957419	0.00497399	0.0592331	0.0128227	0.112567	0.102912	0.174328	0.0758564	0.142792	0.0301609	0.0669342
0.00267613	0.532579	0.0960626	0.00465408	0.00486797	0.0200193	0.090026	0.223899	0.0055222	0.0127781	0.00254509	0.00437107
0.00311386	0.574153	0.0489917	0.0226177	0.0124501	0.000960945	0.0546056	0.0716227	0.181503	0.0244327	0.00140406	0.00414461
0.00558354	0.390127	0.106521	0.0229498	0.0105973	0.00387066	0.020234	0.161163	0.0181191	0.0237278	0.220284	0.0168241
0.00302894	0.599395	0.0426549	0.0442254	0.0141071	0.0150546	0.0362456	0.201822	0.0152081	0.0167131	0.00145377	0.0100906
0.00220401	0.422044	0.105939	0.0105676	0.0640065	0.0589726	0.0365129	0.251205	0.00918014	0.0345996	0.000313357	0.00445575
0.00516319	0.534285	0.0153508	0.22767	0.0308613	0.00356943	0.0927386	0.0739571	0.00442522	0.00722541	0.00131666	0.00343697
0.0400633	0.505282	0.0585468	0.0124041	0.0101119	0.100417	0.0132201	0.183586	0.0411992	0.0223009	0.00455233	0.00831592
0.00273379	0.840696	0.0558106	0.0165149	0.00729273	0.00042104	0.00756049	0.0450418	0.00544366	0.0091852	0.00150799	0.00779193
0.00132697	0.32761	0.0805912	0.0224017	0.0212724	0.0533053	0.041176	0.24824	0.023931	0.0846083	0.00100361	0.0945335
0.00479763	0.381261	0.102685	0.041063	0.00447878	0.0260264	0.0179654	0.195306	0.10322	0.0610919	0.00240306	0.0597019
0.00245224	0.766352	0.0195953	0.00900434	0.0234518	0.00230634	0.0718983	0.0762941	0.00344322	0.0163709	0.00136487	0.00746649
0.00301475	0.72195	0.0226488	0.0170806	0.00476158	0.00335418	0.0328898	0.0778154	0.017107	0.0428478	0.00292824	0.0536018
0.0047096	0.44064	0.047309	0.0184686	0.0182655	0.00633315	0.0981464	0.277964	0.0389665	0.0303263	0.00187057	0.0169999
0.00673226	0.331214	0.0209246	0.0163802	0.00772218	0.055925	0.0792088	0.312624	0.0644934	0.0728963	0.00304201	0.028837
0.0024898	0.604188	0.0214608	0.0143297	0.0338154	0.052055	0.0655723	0.176154	0.00481744	0.0162431	0.00148649	0.00738883
0.0031506	0.364715	0.0218509	0.0260658	0.104572	0.153212	0.110338	0.126556	0.00599081	0.0649139	0.00338248	0.015252
0.215507	0.252483	0.00587016	0.105443	0.0118627	0.029833	0.118218	0.0726638	0.04978	0.0815442	0.0125252	0.0442709
0.013878	0.179772	0.0299497	0.0387532	0.00564643	0.0620009	0.0166332	0.285569	0.157946	0.123074	0.0033724	0.0834046
0.172142	0.382149	0.042979	0.0284897	0.00441684	0.0529067	0.0290292	0.155511	0.0169936	0.0739308	0.0308337	0.0106189
0.00250314	0.673792	0.0837995	0.0104577	0.00342814	0.00234889	0.0140705	0.174225	0.00890044	0.0175119	0.00245911	0.00650376
0.00262551	0.571751	0.00907896	0.0762205	0.00774262	0.059661	0.0418693	0.174259	0.0118529	0.0133067	0.0165432	0.0150891
0.0276411	0.123386	0.0100903	0.0180423	0.00418167	0.120406	0.0101158	0.280752	0.130399	0.111129	0.00368625	0.16017
0.00323581	0.437515	0.121775	0.00870812	0.00472243	0.0390125	0.0487782	0.23459	0.0201771	0.071481	0.00192387	0.00808031
0.00296517	0.296879	0.247997	0.00386637	0.00451794	0.0325911	0.0532768	0.249483	0.0426086	0.0569114	0.0018905	0.00701373
0.00266907	0.354258	0.0153393	0.517415	0.00364163	0.0121848	0.028699	0.0276737	0.0102175	0.0106004	0.00263875	0.0146624
0.00476438	0.548231	0.00555618	0.138218	0.0115686	0.0127643	0.155675	0.0917281	0.00608476	0.0144083	0.00216099	0.00884013
0.0053176	0.34727	0.00249752	0.254334	0.0143933	0.026806	0.213491	0.108894	0.00546378	0.0109128	0.00211484	0.00850555
0.0023382	0.37264	0.170115	0.0394946	0.00747089	0.0807147	0.0178997	0.265284	0.0244209	0.0135796	0.000505415	0.00553681
0.0024385	0.588361	0.00824435	0.0710001	0.0218142	0.103344	0.0385218	0.137911	0.00587134	0.00989453	0.0017235	0.0108761
0.00292985	0.644468	0.0425412	0.032552	0.00481647	0.0121681	0.0254738	0.177329	0.0120573	0.0331621	0.00225684	0.0102448
0.00498012	0.342482	0.0139882	0.00931399	0.0158113	0.120408	0.0910572	0.27183	0.00794989	0.113703	0.000961489	0.0075148
0.00250886	0.511067	0.105676	0.0670827	0.0109616	0.0282627	0.0630096	0.158132	0.0124803	0.0225636	0.00291861	0.0153374
0.00422636	0.342579	0.077624	0.026424	0.00922745	0.0768427	0.0302	0.201337	0.134905	0.0623408	0.0133264	0.0209676
0.00595174	0.437768	0.0466951	0.034724	0.0223255	0.0730372	0.0616838	0.189995	0.013464	0.0255863	0.00217927	0.0865903
0.00252957	0.64159	0.0645095	0.0235534	0.00595688	0.0118558	0.0816108	0.14519	0.00431582	0.0115642	0.00182032	0.00550353
0.00270967	0.814266	0.0158737	0.0160484	0.00476919	0.00256425	0.0211524	0.0970753	0.00545398	0.0132535	0.00172515	0.0051089
0.00267365	0.516048	0.0392667	0.07587	0.00415431	0.0768031	0.0495301	0.196944	0.00341415	0.025707	0.001724	0.00786475
0.0671395	0.336417	0.0236005	0.0104146	0.0488099	0.102589	0.0170498	0.343891	0.00679346	0.036858	0.00229181	0.00414535
0.00517172	0.416043	0.0334703	0.00419582	0.00491707	0.0173576	0.0189489	0.222664	0.00834868	0.0663418	0.195088	0.00745326
0.00993484	0.236058	0.0415615	0.0818193	0.0416929	0.0204252	0.228636	0.140133	0.0112172	0.0813016	0.0558235	0.051397
0.00528255	0.703122	0.0176218	0.0528585	0.00378553	0.00439324	0.00976759	0.0752466	0.0396395	0.0182139	0.00313548	0.0669331
0.00233291	0.51557	0.0608462	0.00787813	0.0138901	0.087204	0.0365179	0.221665	0.00803634	0.035427	0.00120834	0.00942413
0.0489692	0.367122	0.0199131	0.0417875	0.0146618	0.0646022	0.0517746	0.0683626	0.0570651	0.0747928	0.0721174	0.118831
0.00236851	0.618314	0.0407612	0.108219	0.0253476	0.0366721	0.0144892	0.134823	0.00399097	0.00841334	0.00166965	0.00493104
0.00230716	0.586604	0.0328284	0.0100505	0.0114233	0.023301	0.103315	0.189884	0.00729795	0.018585	0.00164815	0.0127561
0.0433393	0.258096	0.0234509	0.0226887	0.0282377	0.100057	0.0637585	0.297716	0.0499954	0.0959854	0.00514168	0.0115329
0.0024474	0.508384	0.0379171	0.226679	0.00394364	0.0227229	0.0227604	0.0813701	0.0269581	0.00961818	0.00613878	0.051061
0.00276312	0.499045	0.057669	0.0329814	0.00481889	0.0458759	0.0292777	0.261475	0.0108364	0.0439621	0.00227065	0.00902434
0.00237058	0.533099	0.111175	0.0353241	0.00451624	0.0555589	0.0199338	0.203553	0.00475146	0.022795	0.00204601	0.00487747
0.00303116	0.611837	0.00753348	0.0677671	0.0100912	0.0507285	0.0976902	0.120221	0.00675815	0.013401	0.000969895	0.00997096
0.0287576	0.167781	0.0136162	0.0112514	0.0232334	0.094371	0.109831	0.331624	0.042455	0.152018	0.0100006	0.0150595
0.00263433	0.573809	0.0158582	0.0136142	0.0235509	0.0294616	0.0951781	0.216297	0.008095	0.0112969	0.00188025	0.00832433
0.00111271	0.107254	0.493798	0.00312271	0.00489562	0.033424	0.0332447	0.300728	0.00755932	0.0126388	0.00105179	0.00117101
0.0147519	0.42959	0.0244381	0.0100166	0.00292242	0.00180491	0.054529	0.413617	0.00564853	0.0206838	0.0170802	0.00491739
0.00304533	0.546225	0.0408648	0.0127348	0.0153277	0.0451963	0.0632583	0.244461	0.00907287	0.0131208	0.00139905	0.00529399
0.00277115	0.702377	0.0132647	0.0377136	0.00646856	0.0200471	0.0641841	0.128748	0.00471113	0.0124807	0.00186074	0.00537282
0.046464	0.107208	0.00821669	0.116135	0.00626896	0.147373	0.0464394	0.298048	0.0598517	0.091569	0.00616408	0.0662619
0.00279664	0.386154	0.247693	0.0201384	0.00356533	0.0271693	0.0114271	0.213127	0.0388202	0.030335	0.00268243	0.0160912
0.00163208	0.108603	0.13896	0.00841791	0.0359023	0.0739564	0.0226546	0.170602	0.0123291	0.421828	0.0026578	0.00245744
0.00238593	0.278709	0.239641	0.0180182	0.00356469	0.0668548	0.011212	0.263369	0.0899129	0.0186203	0.00166405	0.00604835
0.00198971	0.540852	0.0353411	0.0359004	0.0355084	0.0605567	0.0403336	0.18478	0.00409393	0.0320285	0.00145293	0.0271627
0.0023599	0.487006	0.0704862	0.0182809	0.0090897	0.0775446	0.0399277	0.251982	0.012869	0.0235822	0.00134812	0.00552388
0.00297331	0.44325	0.0451228	0.00587787	0.0203204	0.0537756	0.0806573	0.26155	0.0120737	0.0644028	0.00169668	0.00830014
0.00564725	0.304373	0.0350638	0.0154954	0.012608	0.0383272	0.109901	0.291072	0.0671635	0.105131	0.00215897	0.0130598
0.417699	0.359983	0.0246949	0.00553213	0.00597303	0.00699574	0.0168051	0.0782493	0.0406423	0.0319663	0.00293921	0.00852013
0.0474488	0.0590247	0.0166932	0.007008	0.0165426	0.12373	0.0119595	0.437039	0.163402	0.076423	0.000949364	0.039779
0.00184225	0.598279	0.112315	0.0514553	0.00504631	0.00881055	0.0660054	0.113312	0.00533066	0.0332681	0.00193005	0.00240573
0.0307416	0.24785	0.00936822	0.0420327	0.00427954	0.0521623	0.0281833	0.316691	0.102957	0.142856	0.00462936	0.018249
0.0343441	0.586215	0.0315487	0.0084445	0.0254837	0.126998	0.0139617	0.117912	0.0140211	0.031342	0.00267298	0.00705568
0.00606539	0.30199	0.0195412	0.304848	0.000301623	0.00551548	0.0117411	0.0662202	0.0232272	0.0147068	0.00569812	0.240145
0.0087996	0.285312	0.0137221	0.0170402	0.030417	0.0521905	0.196248	0.260781	0.0205037	0.0960912	0.00440965	0.014484
0.00157048	0.279869	0.147191	0.0332494	0.0122687	0.0344314	0.0853288	0.36304	0.0119257	0.0250575	0.00199874	0.00406981
0.00593392	0.360785	0.00980053	0.311819	0.0207207	0.0168	0.0971981	0.098147	0.0187482	0.0291378	0.00528799	0.0256222
0.00223694	0.535274	0.047603	0.0259819	0.0081441	0.0601998	0.0398944	0.248512	0.0105372	0.0135511	0.00134041	0.00672565
0.0448274	0.153196	0.00533068	0.0581049	0.015043	0.0670112	0.0817738	0.309657	0.0656631	0.12689	0.036014	0.0364886
0.0320894	0.178303	0.00942349	0.0137277	0.0283279	0.127895	0.0858944	0.369869	0.0333518	0.107562	0.00292876	0.0106279
0.00195129	0.330097	0.0756005	0.00758476	0.0162657	0.038899	0.133344	0.195933	0.00906048	0.0631341	0.123677	0.00445344
0.00853684	0.091571	0.116841	0.0420315	0.0301083	0.0272236	0.00696286	0.0487886	0.0922674	0.048112	0.0163816	0.471175
0.00384498	0.515061	0.0524652	0.0374963	0.0344601	0.0776629	0.0622488	0.180876	0.00283351	0.0262836	0.00144686	0.00532125
0.0155427	0.191171	0.0663828	0.0362484	0.00345123	0.00710962	0.0222657	0.355806	0.106802	0.182005	0.00242054	0.0107961
0.00542244	0.291127	0.122256	0.00476963	0.0161131	0.0495767	0.0885787	0.39331	0.00723132	0.0182805	0.000607632	0.00272712
0.00386236	0.621743	0.0181316	0.0599537	0.0177224	0.0441518	0.104332	0.101085	0.00865206	0.00998086	0.00372585	0.00665962
0.0025332	0.498508	0.0323385	0.012838	0.0423453	0.102269	0.0597116	0.19383	0.00327041	0.0460589	0.00140759	0.00489096
0.00277239	0.55439	0.0108338	0.00563855	0.016335	0.109758	0.0620851	0.175196	0.00551808	0.0469143	0.00108384	0.00947517
0.00659708	0.559551	0.0126003	0.141621	0.0247608	0.0233059	0.0367794	0.125149	0.0304095	0.0165375	0.00702276	0.0156662
0.00182011	0.322688	0.117106	0.00783658	0.0133839	0.100552	0.0316898	0.288731	0.019605	0.0939564	0.000745317	0.0018863
0.00299305	0.824639	0.0752347	0.0132378	0.00403892	0.000724682	0.007381	0.0298033	0.0089951	0.00837082	0.00183146	0.0227506
0.00180297	0.786435	0.0681536	0.00524748	0.00738096	0.000699589	0.0116376	0.071096	0.00418606	0.0301809	0.0010706	0.0121087
0.00923235	0.315815	0.036225	0.00536954	0.009568	0.118727	0.0352837	0.36527	0.0283138	0.0655713	0.00078565	0.00983804
0.00669654	0.409984	0.0169484	0.0475158	0.00899695	0.0447716	0.0243287	0.19769	0.0418752	0.0363332	0.12483	0.04003
0.488682	0.014279	0.00729649	0.0153597	0.00806649	0.0297641	0.100103	0.174151	0.0356174	0.0310472	0.0934244	0.00220933
0.00358739	0.52245	0.0554927	0.0404126	0.0143215	0.00338168	0.123115	0.0956218	0.0458955	0.0177497	0.00169727	0.0762753
0.186967	0.371623	0.132387	0.00562858	0.00671145	0.0221467	0.00757626	0.180832	0.0183469	0.0504096	0.00189961	0.0154711
0.00227214	0.239678	0.0948694	0.0136935	0.0233558	0.0941275	0.0240409	0.259667	0.00350998	0.240762	0.00162387	0.00240017
0.00426971	0.346189	0.0766529	0.0114836	0.119388	0.115465	0.0344543	0.246327	0.0216141	0.0180401	0.00161669	0.00449969
0.122113	0.122698	0.00781846	0.021597	0.0086569	0.101298	0.114696	0.303653	0.0601972	0.12186	0.00823876	0.00717514
0.00257672	0.854581	0.0254003	0.06116	0.00464746	0.00103351	0.00674693	0.0129214	0.0118426	0.00836902	0.00158797	0.00913353
0.00160402	0.653082	0.131949	0.00365071	0.00334349	0.00152196	0.0209628	0.15507	0.00493668	0.0172064	0.00163824	0.00503513
0.00235284	0.599732	0.00987869	0.192562	0.00790358	0.0062959	0.0228922	0.10341	0.0195708	0.0117748	0.00152087	0.0221066
0.00237786	0.696758	0.116794	0.108902	0.00205914	0.000979089	0.0177998	0.0275751	0.0085607	0.00878912	0.00108333	0.00832273
0.147894	0.0382985	0.00912725	0.0136549	0.0196965	0.106487	0.0184613	0.305222	0.154615	0.147104	0.0178565	0.0215826
0.0023553	0.587353	0.0195591	0.0839959	0.0150047	0.0356507	0.0897994	0.143552	0.00396982	0.0101477	0.0016174	0.00699517
0.0012567	0.407377	0.152416	0.010802	0.00775032	0.145546	0.0791876	0.173195	0.00881405	0.00786825	0.000996628	0.00479084
0.00225474	0.635945	0.0130334	0.0294432	0.0134035	0.0478416	0.0703928	0.16549	0.00409703	0.010184	0.00164699	0.00626833
0.00417515	0.472287	0.0836437	0.0257604	0.00296015	0.0126598	0.0137511	0.172787	0.105259	0.0583976	0.00209333	0.046225
0.00141951	0.383148	0.123537	0.014398	0.0127894	0.062004	0.0564206	0.320507	0.00794486	0.0142366	0.000630955	0.00296418
0.00201517	0.626321	0.226762	0.0383566	0.00287765	0.00169327	0.0260953	0.0463194	0.00742663	0.0174821	0.00152802	0.00312282
0.0138381	0.154916	0.0311076	0.052538	0.0235143	0.0908184	0.0527819	0.249155	0.0608728	0.0742303	0.0459027	0.150325
0.00232357	0.484948	0.13843	0.00829056	0.0039236	0.0366754	0.00640464	0.231051	0.0104182	0.0709462	0.000787078	0.00580253
0.047334	0.0366142	0.0109476	0.0419011	0.0174636	0.138132	0.0256932	0.535661	0.0434016	0.0815364	0.00124841	0.0200669
0.183034	0.183816	0.0988823	0.0312281	0.188342	0.0419055	0.047615	0.177773	0.0229946	0.0108988	0.00829462	0.00521605
0.00531614	0.00334309	0.00558603	0.094641	0.0453861	0.59511	0.00495672	0.222185	0.00281699	0.00914968	0.00590897	0.00560085
0.00214452	0.559669	0.325319	0.00532303	0.00344224	0.000778633	0.00611223	0.0707485	0.00837007	0.00904092	0.000932531	0.0081198
0.104519	0.0512021	0.00757613	0.00887544	0.00512597	0.136199	0.0320924	0.362216	0.0979535	0.16706	0.00763061	0.0195508
0.00314051	0.393075	0.00675713	0.445381	0.00793594	0.00594332	0.0626055	0.0305414	0.0126362	0.00745316	0.00326663	0.0212646
0.187997	0.0237706	0.0083425	0.0035928	0.0391956	0.0577323	0.0951858	0.247818	0.0257347	0.284438	0.0235391	0.00265354
0.00534471	0.384314	0.046818	0.0526743	0.000530231	0.0048826	0.00424244	0.0642738	0.0849246	0.0321203	0.00428738	0.315588
0.00387891	0.303992	0.0204997	0.0325507	0.0120168	0.0743425	0.0390952	0.340841	0.0644875	0.10195	0.000821616	0.00552402
0.00325764	0.61211	0.0158694	0.224728	0.0112335	0.00233129	0.0449074	0.0424957	0.00841654	0.0108551	0.00175767	0.0220371
0.00246825	0.216863	0.149505	0.0185574	0.00783803	0.0813836	0.00308815	0.298688	0.192557	0.0128606	0.000844701	0.0153479

## Sheet: E02_A_Endosome
NN outputs for markers (Endosome)
Cytosol	ER	Golgi	Lysosome	Mitochondria	Nucleus	Peroxisome	PM	Endosome	LD	Protein-Complex	Translation
0.119148	0.0126074	0.0296749	0.00413772	8.94601e-05	0.00953554	0.00308403	0.00904692	0.720008	0.00963595	0.0212222	0.0618107
0.0033715	0.220919	0.100178	0.0414567	0.00464385	0.0241971	0.012998	0.150334	0.363614	0.0128063	0.000684942	0.0647961
0.0840373	0.0120575	0.026833	0.00107567	8.67949e-07	0.00091055	0.00247992	0.00430978	0.715778	0.0160602	0.0194505	0.117007
0.00387283	0.00532834	0.0278069	0.0587844	0.133068	0.0348057	0.000938888	0.00959457	0.59818	0.004766	0.0148818	0.107972
0.00356313	0.0339275	0.0304986	0.0270699	0.00454671	0.0247452	0.0110473	0.0367054	0.712178	0.00764202	0.0176891	0.0903867
0.425058	0.000921545	0.00714101	0.000873942	0.000738351	0.000726861	0.00169989	0.00724094	0.354149	0.0304137	0.0975185	0.0735176
0.184606	0.00971246	0.0232137	0.00378529	9.02009e-05	0.00341272	0.00232162	0.133123	0.472304	0.0649138	0.028755	0.0737622
0.00486453	0.00302432	0.207864	0.00672332	0.00376418	0.0095349	0.00350686	0.00277581	0.118578	0.478471	0.158061	0.00283301
0.00331193	0.141609	0.119686	0.0296482	0.00087164	0.00690743	0.00210856	0.0205838	0.619479	0.00930266	0.00197345	0.0445184
0.00326761	0.488273	0.0871993	0.0293181	0.00128172	0.00233266	0.00401554	0.0613586	0.240479	0.00624124	0.00111734	0.0751166
0.329622	0.0161987	0.00516263	0.0162261	0.000364469	0.0293429	0.0119595	0.0232395	0.149244	0.0912137	0.224438	0.102988
0.12938	0.00965675	0.00542522	0.0155446	0.0017291	0.00988181	0.00415546	0.0174411	0.270807	0.0583523	0.374497	0.10313
0.00429508	0.121935	0.112374	0.000978617	0.000485312	0.00576895	0.0205387	0.034787	0.440575	0.0571637	0.0434873	0.157611
0.283339	0.00129348	0.00569437	0.00170527	0.00297412	0.00457098	0.00207941	0.00260565	0.0822166	0.0130059	0.587917	0.0125982
0.00385419	0.173912	0.106111	0.000892808	0.000387228	0.000617878	0.000524711	0.00377748	0.602443	0.00417156	0.00217916	0.10113
0.165507	0.0335422	0.0261613	0.0493257	0.000446673	0.0203915	0.0150335	0.0880493	0.460363	0.0574547	0.0324279	0.0512967
0.14399	0.00699682	0.002839	0.0079442	0.00575659	0.0335217	0.00733903	0.0145663	0.186276	0.0739986	0.210474	0.306298
0.218511	0.0022523	0.00427329	0.00170494	0.000904868	0.00115507	0.000504203	0.00188463	0.281898	0.0111359	0.396803	0.0789732
0.241093	0.0740531	0.00716485	0.0218759	0.00130932	0.0136248	0.0141606	0.0928505	0.265901	0.0923946	0.0368056	0.138767
0.00374546	0.0354212	0.322441	0.0011457	0.00341851	0.00282135	0.00367508	0.112642	0.269842	0.0181942	0.213838	0.012815
0.189034	0.00224951	0.00721222	0.000772193	0.00479005	0.0258614	0.0103616	0.00546891	0.273734	0.0186342	0.428545	0.0333378
0.0146436	0.0664285	0.0106804	0.0547965	0.0245279	0.0654877	0.0585513	0.108535	0.109785	0.09643	0.10885	0.281283
0.0590426	0.00797569	0.0222647	0.00337087	0.00266891	0.00249684	0.00478083	0.0168302	0.294228	0.0663358	0.502894	0.0171116
0.156515	0.0029087	0.00518669	0.00139002	0.0026504	0.00113553	0.00155241	0.00166187	0.151323	0.00599439	0.64544	0.0242427
0.00301877	0.241462	0.121172	0.00232019	0.000913374	0.000834584	0.00236932	0.0152436	0.486736	0.0123097	0.00076103	0.112859
0.00261081	0.0967878	0.21038	0.00377726	0.0580774	0.00923152	0.00833553	0.0641554	0.266406	0.212001	0.00692516	0.0613114
0.384535	0.0058158	0.00538103	0.0114566	0.00301563	0.0100021	0.00199459	0.0266034	0.35181	0.0976072	0.0568434	0.0449353
0.00361777	0.132301	0.0463758	0.00856508	0.00173823	0.00980743	0.00540045	0.0221639	0.675363	0.0168508	0.00320778	0.0746094
0.00464145	0.0957858	0.0430005	0.0373228	0.00209346	0.0125769	0.00250113	0.0298306	0.704422	0.0280211	0.00233647	0.0374675
0.126955	0.0367266	0.00645717	0.00439069	0.000536758	0.00131667	0.001266	0.0102284	0.527705	0.0266597	0.063013	0.194746
0.117785	0.0301039	0.111023	0.0082535	0.00363923	0.0209656	0.00188332	0.0176642	0.6236	0.0150671	0.0305498	0.0194659
0.00473927	0.131823	0.0733798	0.00295366	0.000727757	0.00309118	0.0019881	0.00449702	0.576759	0.0177991	0.00586945	0.176372
0.0342035	0.0381658	0.0108017	0.017853	0.00210468	0.0229553	0.0080868	0.0286268	0.597319	0.0227314	0.0214481	0.195704
0.00558804	0.0452141	0.0390923	0.00150686	0.000584496	0.0035727	0.000686463	0.00190472	0.720142	0.00966945	0.0118284	0.160211
0.00806565	0.0141099	0.0699735	0.00306524	0.000314795	0.0029212	0.00130997	0.0036641	0.588425	0.00888137	0.0404224	0.258847
0.41673	0.00375345	0.0118169	0.00116052	0.000154313	0.00120983	0.00321266	0.0967428	0.309687	0.127408	0.0208315	0.00729341
0.00297634	0.115192	0.0724218	0.00277736	0.00133286	0.00313907	0.000569732	0.00232987	0.608058	0.00276329	0.00560106	0.182839
0.243891	0.00428001	0.00747602	0.00256396	0.00187607	0.0134965	0.00272472	0.0237766	0.280664	0.0726464	0.244052	0.102553
0.00631879	0.194226	0.0549969	0.0231282	0.00622004	0.0272269	0.00763449	0.122418	0.41497	0.0156824	0.00750068	0.119677
0.271679	0.00226751	0.00428852	0.000355742	0.000834922	0.00324984	0.00109539	0.00488166	0.39086	0.0535891	0.180967	0.0859314
0.00389395	0.117543	0.0501617	0.00165979	0.000711976	0.00289101	0.000488156	0.00612203	0.661159	0.0188869	0.00446248	0.13202
0.00289691	0.281113	0.202559	0.00131998	0.000814989	0.000792754	0.00160111	0.0185622	0.426572	0.00776918	0.000892389	0.055107
0.698385	0.00330737	0.00431417	0.00205306	0.00104152	0.00647183	0.00260733	0.0057898	0.19083	0.0328557	0.0412683	0.0110766
0.271304	0.00344069	0.00404082	0.00136149	0.000775087	0.000393907	0.000439079	0.00317538	0.365946	0.0553142	0.112052	0.181757
0.00374426	0.255455	0.166553	0.0258956	0.000828277	0.00113487	0.00709517	0.0824188	0.36822	0.0102791	0.0014236	0.0769519
0.430069	0.00168499	0.0150369	0.00194882	4.91379e-05	0.00222021	0.00311739	0.0760638	0.358886	0.084301	0.0237401	0.00288193
0.0989605	0.0207999	0.0117958	0.0251049	0.00475971	0.0315037	0.019221	0.0733718	0.233081	0.127734	0.1869	0.166767
0.135521	0.00621295	0.00913554	0.00628823	0.00138494	0.0374271	0.0089704	0.0628167	0.542484	0.0946258	0.0239726	0.0711604
0.378544	0.00232265	0.00524878	0.00233943	0.000855655	0.00111534	0.00240078	0.00306463	0.286877	0.0353549	0.251986	0.0298913
0.00485224	0.0697528	0.336923	0.0101594	0.000511325	0.00119638	0.0335665	0.0106928	0.491818	0.0155617	0.00184784	0.0231175
0.00398697	0.163508	0.0359986	0.000567768	0.000626626	0.000811534	0.000681449	0.00323362	0.704072	0.00753809	0.00219867	0.0767772
0.00280479	0.624345	0.0625447	0.00298498	0.00214486	0.00107139	0.00427221	0.132599	0.0622472	0.090614	0.000870561	0.0135014
0.00476635	0.0693963	0.0234025	0	0	0.0001539	0.000818125	0.00253411	0.655889	0.00834558	0.00534167	0.229352
0.0086573	0.00254519	0.0242114	4.57155e-05	0.00231871	0.0674885	0.141494	0.0309666	0.637541	0.0344112	0.0131873	0.0371332
0.0234575	0.202145	0.0824144	0.00900473	0.00829473	0.057135	0.0129219	0.218149	0.203168	0.122785	0.00889327	0.051632
0.00480317	0.106464	0.0290738	0.000205308	0.000287043	0.000230975	0.000740789	0.00175671	0.568564	0.00713419	0.00390615	0.276835
0.285648	0.019882	0.00977124	0.0197961	0.00357834	0.00771986	0.0204658	0.0353909	0.102788	0.0805414	0.38716	0.0272581
0.00232796	0.137743	0.2432	0.00733341	0.000904695	0.00268788	0.00420658	0.14985	0.278091	0.0479452	0.00750015	0.11821
0.0374482	0.00375179	0.00839118	0.00329796	0.00128306	0.00103739	0.00139132	0.00416277	0.314327	0.015597	0.510935	0.0983772
0.00321925	0.156092	0.0900019	0.00853756	0.000683362	0.00214619	0.00147598	0.0152547	0.645826	0.00647371	0.00249319	0.0677961
0.032946	0.00359304	0.00746533	0.00259865	0.00241711	0.00122124	0.00254873	0.00358275	0.275786	0.0175307	0.609983	0.0403273
0.327267	0.00557416	0.00888905	0.00587999	0.00120282	0.0284881	0.0045172	0.00878422	0.142466	0.0576325	0.201138	0.208162
0.395457	0.00493157	0.00406686	0.00271295	0.00125459	0.0024214	0.000597247	0.00290339	0.152056	0.012035	0.32865	0.0929138
0.0277127	0.22873	0.0440853	0.0309584	0.0116938	0.0481658	0.0271189	0.239096	0.166284	0.118854	0.00827251	0.0490288
0.0170151	0.0253386	0.0363879	0.0186603	0.00310742	0.0538457	0.0137595	0.0655882	0.572446	0.0504039	0.0130322	0.130415
0.00837956	0.410522	0.0810114	0.0192285	0.0101598	0.027724	0.0630867	0.177173	0.146322	0.0172465	0.00435701	0.03479
0.00262671	0.171313	0.0396571	0.00169544	0.000716944	0.000866012	0.000957017	0.0231658	0.607295	0.0362595	0.0268119	0.0886363
0.00323293	0.234175	0.123116	0	0.000949472	0.000320994	0.00100319	0.0175797	0.603522	0.00523233	0.00126189	0.00960607
0.135257	0.0041925	0.00594014	0.00709857	0.00153603	0.012095	0.0052928	0.00916376	0.273888	0.0403549	0.421383	0.0837988
0.00171823	0.0883738	0.0462287	0.0362121	0.00181556	0.0346249	0.0169796	0.0551509	0.461418	0.0636833	0.062142	0.131652
0.0782747	0.0127271	0.0767412	0.0274814	0.000543263	0.0123795	0.00237576	0.0313673	0.643529	0.0343773	0.0287994	0.0514046
0.0320566	0.00966744	0.0567773	0.00302045	0.00771818	0.0684226	0.00729977	0.0987591	0.569806	0.0926541	0.00894546	0.044873
0.00649149	0.0218225	0.0650391	0.00321463	0.000220041	0.003628	0.000526995	0.00340394	0.52516	0.00873915	0.0214025	0.340351
0.00334606	0.16712	0.0540743	0.0053193	0.00122465	0.00345342	0.00118734	0.0063809	0.671241	0.0102501	0.00179148	0.0746111
0.118468	0.00628519	0.0383711	0.0019881	0	0.000764257	0.00644929	0.102897	0.516391	0.139552	0.0301851	0.0386484
0.00459541	0.142013	0.0270358	0.0364921	0.000766077	0.00365429	0.0021764	0.0111624	0.651871	0.00679676	0.00250054	0.110936
0.139806	0.0047221	0.00535717	0.00130997	0.000940753	0.00210219	0.0037682	0.00260168	0.293644	0.0842581	0.31863	0.14286
0.00302699	0.0552778	0.169164	0.055307	0.00880322	0.0141515	0.0696324	0.0949605	0.509118	0.0111681	0.00407654	0.00531409
0.00381218	0.112936	0.056833	0.000463694	0.000524024	0.000401068	0.000950403	0.00285232	0.63199	0.00772099	0.00514867	0.176367
0.00529037	0.0247285	0.00461797	0.108553	0.00652267	0.0391218	0.00768039	0.0174599	0.0765136	0.0228393	0.0889618	0.597711
0.762861	0.0027769	0.0069235	0.00541547	0.00146685	0.0340115	0.00219197	0.0123038	0.0561877	0.0395284	0.0636675	0.0126656
0.0109082	0.0471263	0.0461332	0.0166043	0.00291643	0.0377897	0.00483207	0.0484622	0.691251	0.0274753	0.0124389	0.054062
0.00806651	0.0102363	0.0225908	0.00287641	0.000294005	0.000894864	0.000386858	0.00777082	0.53592	0.0155765	0.0105587	0.384828
0.00313896	0.116789	0.117632	0.0219205	0.000998039	0.00781371	0.0017455	0.0226305	0.629048	0.0103355	0.00288882	0.0650581
0.00602154	0.0843282	0.206019	0.00900832	0.000894028	0.00564192	0.00100156	0.00509869	0.484113	0.00601883	0.0118982	0.179957
0.0439963	0.0425493	0.0146257	0.0361878	0.00164064	0.0134499	0.00513104	0.0598176	0.407829	0.0787343	0.0297683	0.266271
0.169867	0.00423996	0.0140359	0.000346528	0.000339438	0	0.00226203	0.00603855	0.422191	0.0345465	0.334294	0.0118379
0.00360398	0.183767	0.0693248	0.000257945	0.000669111	0.000617733	0.000561983	0.00355797	0.672026	0.00482685	0.00202722	0.0587597
0.0579387	0.00238395	0.00658276	0.00205534	0.00129608	0.000561001	0.00119293	0.00473784	0.456766	0.0196382	0.0812498	0.365597
0.358322	0.00525984	0.00296029	0.0064509	0.00441628	0.0137024	0.00443805	0.00500975	0.129925	0.0303095	0.200885	0.238321
0.00893099	0.446218	0.149894	0.102439	0.0455737	0.0235915	0.0267972	0.109089	0.0427934	0.0138944	0.0108582	0.0199203
0.00703381	0.0295174	0.154817	0.00235926	0.000325166	0.00205078	0.00121489	0.00287219	0.56959	0.00799359	0.0281763	0.19405
0.115504	0.0319046	0.00482114	0.046166	0.00802592	0.0352239	0.0153685	0.0669841	0.145061	0.092793	0.311559	0.126589
0.0181224	0.196264	0.0252446	0.0268929	0.00849521	0.00857894	0.0733453	0.172235	0.245349	0.127372	0.0130951	0.0850058
0.0610445	0.00682813	0.00933124	0.0112399	0.00324286	0.00862316	0.00621417	0.016205	0.235175	0.0942355	0.423354	0.124506
0.0861733	0.0107788	0.0265152	0.00167018	0	0.000996937	0.000410114	0.0178537	0.614673	0.0582368	0.0143829	0.168309
0.00556873	0.00330929	0.0221315	0.00150846	0	0.00171513	0.000384892	0.00122139	0.63817	0.00968399	0.00928994	0.307017
0.0712872	0.00560179	0.0175421	0.0108768	0.00258733	0.0034043	0.00992997	0.0147922	0.416497	0.0790147	0.326097	0.0423693
0.418951	0.00161912	0.00649453	0.00111563	0	0.00187201	0.00118014	0.00538806	0.319909	0.13986	0.0755438	0.0280667
0.00383242	0.164619	0.0260928	0.00208881	0.000818322	0.00205896	0.000976336	0.00325202	0.692043	0.00996245	0.00207644	0.0921793
0.0048101	0.0227008	0.177516	5.99482e-05	0	0	0.00072962	0.0041935	0.620317	0.00723989	0.00971094	0.152722
0.013139	0.102085	0.0865768	0.0277081	0.00108779	0.0140809	0.00460416	0.0999593	0.343622	0.0602903	0.0223165	0.224531
0.00543655	0.0937833	0.0673037	0.0290832	0.000927371	0.0162517	0.0021803	0.0651573	0.609976	0.0468399	0.00315083	0.0599101
0.170239	0.234523	0.0934664	0.0838754	0.00458168	0.0363684	0.0311088	0.125992	0.157899	0.0228596	0.00428754	0.0347992
0.275556	0.00527722	0.00408436	0.00202365	0.000818377	0.0010271	0.000592897	0.00441167	0.371247	0.0270313	0.186076	0.121854
0.329726	0.00839243	0.0263532	0.0015088	0.000545944	0.00275366	0.0027102	0.108162	0.325258	0.128483	0.0283919	0.0377148
0.00510689	0.0766846	0.253266	0.0233404	0.000771305	0.0145178	0.00373427	0.0613225	0.479908	0.0425044	0.00216639	0.0366776
0.00328601	0.0837135	0.0809631	0.00296406	0.000663644	0.0160431	0.0226965	0.0179247	0.687798	0.00815894	0.0186673	0.0571207
0.597314	0.00335935	0.00467031	0.00378879	0.00122935	0.0115186	0.000890671	0.00111253	0.0862709	0.0242776	0.17247	0.0930977
0.00278049	0.40137	0.050943	0.00294838	0.00768229	0.0453914	0.181367	0.0674387	0.0362067	0.187535	0.00216594	0.0141711
0.00470953	0.102803	0.0486249	0.0292072	0.00104923	0.0149258	0.00637593	0.0816042	0.619954	0.0422486	0.0032107	0.0452863
0.0028732	0.235434	0.261538	0.000744278	0.000975374	0.000120308	0.000748706	0.00819189	0.474798	0.00339025	0.00126417	0.00992119
0.00267027	0.167637	0.0376409	0.033462	0.00304151	0.0854646	0.00838462	0.151628	0.290804	0.0653061	0.00168335	0.152278
0.00418857	0.00027524	0.0327727	0	0.00171814	0.000345985	0	0.00764341	0.905207	0.00260685	0.00126814	0.0439741
0.326271	0.00762284	0.00456429	0.00533532	0.00446532	0.00967185	0.00910416	0.0155521	0.136886	0.0548807	0.389191	0.0364561
0.00466972	0.107034	0.0156461	0.000412589	0.000215436	0.000413826	0.000415769	0.00275769	0.711913	0.00840855	0.00393863	0.144174
0.081564	0.0082023	0.00600435	0.0294411	0.00621536	0.0812466	0.0297873	0.022043	0.243258	0.0722627	0.319232	0.100743
0.20917	0.00560745	0.0772189	0.00151591	0	0.0121421	0.00409775	0.0685312	0.524293	0.0555136	0.0333898	0.00852017
0.00263098	0.501974	0.104683	0.052026	0.00406571	0.0116891	0.00603113	0.116417	0.109881	0.0124306	0.00238082	0.0757911
0.00550618	0.00476083	0.197739	0.000215606	0.0032133	0.0308636	0.000727364	0.0038156	0.547237	0.0234529	0.0093652	0.173103
0.00532663	0.0885623	0.0217407	0.000913128	0.000333593	0.000428333	0.000866171	0.0026743	0.645328	0.00821246	0.00663578	0.218978

## Sheet: E02_A_Protein-Complex
NN outputs for markers (Protein-Complex)
Cytosol	ER	Golgi	Lysosome	Mitochondria	Nucleus	Peroxisome	PM	Endosome	LD	Protein-Complex	Translation
0.00893656	0.00365972	0.00754066	0.00350227	0.00566381	0.00484319	0.00369219	0.0039729	0.00438206	0.00386848	0.944115	0.00582364
0.352341	0.00800462	0.00518011	0.00648111	0.00148368	0.00625859	0.00524598	0.0184763	0.194238	0.080557	0.291131	0.0306032
0.0863735	0.00338429	0.00594517	0.00288823	0.00558945	0.00467207	0.00431837	0.00280265	0.00667556	0.0045382	0.869356	0.00345643
0.659929	0.0233828	0.00340288	0.0111614	0.00486261	0.00507408	0.00399313	0.00450993	0.0578134	0.0127605	0.108253	0.104857
0.0565843	0.00323944	0.0078603	0.00335516	0.00370098	0.00179887	0.0014299	0.000624055	0.00408576	0.00692563	0.72281	0.187585
0.00794327	0.00400728	0.00743513	0.00392055	0.00591869	0.00619595	0.00451789	0.00486739	0.00762377	0.0037905	0.937665	0.00611479
0.132664	0.00024583	0.119886	0.00923502	0.0105272	0.0111612	0.003123	0.0107481	0.116792	0.0112295	0.554783	0.0196046
0.66857	0.00277206	0.00305814	0.00280452	0.00196994	0.123063	0.00191444	0.024331	0.0150062	0.0147976	0.122511	0.0192026
0.452237	0.00336495	0.00997212	0.00599898	0.00283889	0.0431073	0.00501602	0.0157951	0.0335648	0.0140937	0.410047	0.00396412
0.44557	0.00412305	0.00413451	0.00589583	0.00406813	0.0141627	0.0098703	0.00678924	0.0631519	0.0224536	0.414206	0.00557487
0.473835	0.000474206	0.00590947	0.0018915	0.00529613	0.0764961	0.00461392	0.00259688	0.0223266	0.0180584	0.3715	0.0170018
0.272401	0.00461003	0.00625181	0.000953342	0.00589295	0.00698927	0.00187508	0.00312495	0.00992803	0.0227509	0.659624	0.00559859
0.00937821	0.00143813	0.0227706	0.00240465	0.00453448	0.00834105	0.00315588	0.00273718	0.132604	0.00894799	0.777507	0.026181
0.084812	0.00423754	0.00618303	0.0020808	0.00288202	0.00160822	0.00139165	0.00292449	0.124655	0.0122976	0.730703	0.0262246
0.103781	0.00357	0.00566662	0.00194947	0.00432086	0.00457585	0.00313734	0.00123762	0.00740441	0.00930695	0.822705	0.0323456
0.875728	0.00251486	0.00639562	0.00297143	0.00354017	0.0172969	0.00516852	0.00448063	0.00397211	0.00438763	0.0724359	0.00110804
0.700381	0.00308819	0.00505486	0.00266337	0.0019213	0.00295211	0.0017603	0.00325413	0.0523992	0.0215807	0.195194	0.00975016
0.215738	0.003144	0.00364514	0.0071079	0.00311966	0.0057989	0.00406684	0.00360649	0.0145969	0.00930524	0.678678	0.0511938
0.485985	0.00284908	0.00531119	0.00203916	0.00514085	0.134232	0.00377798	0.00683099	0.143629	0.00824352	0.194577	0.00738399
0.420984	0.00716657	0.00581772	0.0084616	0.00252138	0.00985919	0.00647602	0.00703092	0.106624	0.0465645	0.359126	0.0193683
0.286983	0.00305175	0.0101504	0.00434689	0.00520468	0.00674894	0.0054719	0.00293305	0.0482944	0.0054406	0.618424	0.0029503
0.101899	0.00304791	0.0115854	0.00229023	0.00364194	0.00347072	0.00361037	0.00389007	0.176044	0.00513907	0.677993	0.00738793
0.419019	0.00505184	0.00611658	0.0343492	0.0424615	0.0197123	0.00300066	0.00630376	0.0491268	0.0105449	0.396101	0.00821229
0.0279536	0.00454066	0.00584684	0.00542515	0.00441989	0.00453424	0.00474034	0.00416971	0.0247041	0.0078665	0.897262	0.00853729
0.0772248	0.0032965	0.00600826	0.00296616	0.00466809	0.00236628	0.00299736	0.00251885	0.0168516	0.00403723	0.860899	0.0161655
0.169434	0.00248804	0.00755755	0.00227559	0.00284285	0.00119319	0.00102485	0.00222626	0.116772	0.00729134	0.678389	0.00850582
0.00785919	0.00350847	0.00612072	0.00342642	0.00586305	0.00405753	0.00364128	0.0033212	0.00414154	0.00392765	0.945239	0.00889387
0.0204769	0.00480937	0.00855618	0.00163044	0.0070993	0.00601362	0.00472708	0.00258146	0.00365579	0.0405319	0.894532	0.00538576
0.0736539	0.00159883	0.0110627	0.00678595	0.0046855	0.0212035	0	0.00740431	0.38504	0.00343205	0.464327	0.0208053
0.0219961	0.00411901	0.00650961	0.0027483	0.00525449	0.00508741	0.00386445	0.00395662	0.00643965	0.00385756	0.932888	0.00327899
0.0326748	0.0111855	0.017339	0.0296189	0.0572382	0.129846	0.0263371	0.0910216	0.0408331	0.103702	0.4397	0.0205037
0.0459108	0.0050039	0.00458968	0.0112097	0.00519665	0.0373455	0.00810356	0.00614757	0.0471275	0.0108683	0.793316	0.0251813
0.372746	0.00409943	0.00402544	0.00471748	0.00416763	0.0145386	0.00734886	0.00282028	0.0281983	0.00562324	0.547839	0.00387548
0.246141	0.00408007	0.00485061	0.00628419	0.00429207	0.00433105	0.00505647	0.00364157	0.00931635	0.0054312	0.682221	0.0243549
0.167148	0.00392332	0.00512554	0.00675193	0.004377	0.00780736	0.0052776	0.00525219	0.0141852	0.00753516	0.75401	0.0186065
0.346212	0.00292268	0.00562411	0.00344072	0.00435424	0.00667656	0.00354209	0.00491926	0.0149194	0.00452323	0.597449	0.00541628
0.841821	0.00302604	0.00324186	0.00322053	0.00420599	0.00891012	0.00331519	0.0045993	0.00866902	0.00762819	0.0319867	0.0793757
0.350018	0.00376269	0.00623417	0.00272635	0.00584094	0.00662794	0.00677893	0.00429054	0.00665745	0.0153249	0.588868	0.00286997
0.0123024	0.00357952	0.00576671	0.00349049	0.00544286	0.00354714	0.00316354	0.00259805	0.00565934	0.00448578	0.93503	0.014934
0.192872	0.00729731	0.00308307	0.00736182	0.0053712	0.0462613	0.00470583	0.0323638	0.106429	0.00616842	0.560879	0.0272074
0.616433	0.00202162	0.00508437	0.00137372	0.00290043	0.00523025	0.00318763	0.00398442	0.0331459	0.0169562	0.306728	0.00295368
0.177831	0.00208658	0.0198094	0.00134298	0.00104953	0.00146435	0.000515753	0.00746401	0.341183	0.0202905	0.224434	0.202529
0.361745	0.00484947	0.00818426	0.00511995	0.00436913	0.0100406	0.00716088	0.0112408	0.067648	0.0344635	0.467874	0.0173049
0.0308058	0.00397793	0.0052353	0.00858247	0.00515184	0.00581483	0.00471048	0.00424212	0.0234221	0.0076456	0.87989	0.0205217
0.0337549	0.00369326	0.00708684	0.00391324	0.00510575	0.00439189	0.00310886	0.00398781	0.00353819	0.00388598	0.920002	0.00753139
0.0138858	0.00337043	0.00618528	0.00401756	0.00572	0.00413227	0.00321457	0.00298741	0.00355638	0.00373589	0.938372	0.0108225
0.136546	0.00286125	0.00831664	0.00279776	0.00412432	0.00248891	0.00169435	0.00203232	0.0132902	0.00442975	0.796396	0.0250229
0.493417	0.00430092	0.00653863	0.00200466	0.00329351	0.00308213	0.00276124	0.00317497	0.041539	0.00630068	0.427778	0.00580883
0.0826917	0.00312996	0.00523977	0.00503056	0.00517366	0.00464628	0.00461317	0.00401966	0.0115642	0.00356877	0.858967	0.0113557
0.00559307	0.00336193	0.00320134	0.00381123	0.0125765	0.0383166	0.00612856	0.00296608	0.00251206	0.00478152	0.913053	0.00369802
0.609609	0.00241807	0.00442622	0.00334005	0.00480096	0.007837	0.00517728	0.00375997	0.00812729	0.00604156	0.340296	0.00416733
0.0913182	0.0098835	0.00683117	0.00908507	0.00279864	0.00317565	0.00655899	0.0111083	0.172252	0.0694042	0.53717	0.0804152
0.0188927	0.00408394	0.00554718	0.00441616	0.0131935	0.0426963	0.0189336	0.0151207	0.0442387	0.0081105	0.820666	0.00410033
0.0260617	0.00749473	0.00503433	0.0213704	0.00881255	0.0375967	0.03497	0.038122	0.0507607	0.00990451	0.754628	0.00524493
0.0608417	0.00410588	0.00509403	0.0149209	0.0557639	0.0143192	0.00243603	0.00234353	0.0293039	0.00302279	0.804313	0.00353516
0.010496	0.00342709	0.0063342	0.00419377	0.00566287	0.00526333	0.00377839	0.00454974	0.00691087	0.00382646	0.940508	0.00504895
0.0229517	0.00473702	0.00487271	0.00484766	0.00418975	0.00250849	0.00285455	0.00295497	0.0192955	0.00686151	0.859858	0.0640687
0.00881006	0.00367431	0.00721556	0.00410654	0.00579516	0.00662471	0.00435209	0.00355281	0.00569285	0.00564538	0.937243	0.00728779
0.186764	0.00858847	0.00515147	0.00905198	0.00363194	0.00466933	0.00623322	0.00609417	0.11741	0.100043	0.494129	0.0582339
0.0084421	0.0037196	0.00775565	0.00333366	0.00549915	0.00503377	0.00403319	0.00444743	0.00528698	0.0039194	0.944278	0.00425122
0.00930633	0.00334756	0.00725223	0.00420006	0.00669818	0.00599399	0.00274046	0.00251801	0.00218035	0.00374013	0.944303	0.0077196
0.255663	0.0040657	0.00423204	0.0057504	0.00369822	0.00370649	0.00356655	0.00328912	0.0154525	0.0141228	0.606716	0.0797372
0.0159465	0.00333821	0.011977	0.00266574	0.0058105	0.00532878	0.00349338	0.00302939	0.00553892	0.00491764	0.927787	0.0101674
0.0265368	0.00311456	0.00695191	0.0032534	0.00591288	0.00481687	0.00358491	0.00267855	0.00766668	0.00412832	0.91882	0.0125355
0.00718888	0.00352393	0.00695787	0.00395484	0.00558494	0.00518985	0.003946	0.00485029	0.005643	0.00380553	0.944429	0.00492545
0.0257685	0.00337414	0.00695931	0.0036651	0.00579576	0.00502829	0.00317685	0.00328257	0.00312053	0.00390777	0.927076	0.00884504
0.283125	0.0045068	0.00464172	0.00270271	0.00305611	0.00367073	0.00212388	0.00238869	0.0142237	0.0079094	0.656872	0.0147796
0.0116576	0.00357122	0.00659459	0.00324183	0.00509357	0.00444426	0.00425414	0.00406439	0.00643597	0.0041797	0.939023	0.00743982
0.428131	0.00580755	0.00405775	0.0127174	0.00249475	0.0309735	0.0138951	0.0167225	0.0582691	0.0297614	0.375596	0.0215742
0.0049623	0.00433805	0.00548225	0.00441761	0.0230426	0.108286	0.005395	0.0224638	0.0229154	0.00360523	0.792203	0.00288845
0.595368	0.00347942	0.0038322	0.00334872	0.00396227	0.00456228	0.00448113	0.00321676	0.0201836	0.0190975	0.312004	0.0264635
0.0175603	0.00504553	0.00806691	0.00269647	0.00741301	0.00485266	0.00339286	0.00290039	0.00345467	0.00958005	0.928009	0.00702863
0.0118295	0.00522923	0.0256518	0.00591937	0.0139595	0.00422857	0.00355855	0.000349621	0.120229	0.00688676	0.565343	0.236816
0.0160882	0.00412695	0.00528348	0.00419522	0.00505185	0.00493416	0.00404521	0.00287878	0.00941512	0.00411658	0.926854	0.0130104
0.450663	0.00394757	0.00560464	0.00362034	0.00456657	0.00549652	0.00537347	0.00292281	0.00873373	0.0039399	0.502607	0.00252448
0.024619	0.00308146	0.00165296	0.0416071	0.0323222	0.651304	0.126305	0.0910277	0.00206647	0.00860105	0.00530198	0.0121105
0.200341	0.00319841	0.00617919	0.00335533	0.00500121	0.00751821	0.00508778	0.00370508	0.00734971	0.0027229	0.754165	0.00137541
0.0103017	0.00402815	0.00540527	0.00352598	0.00534721	0.00465493	0.00383956	0.00296547	0.0045535	0.00378314	0.943339	0.00825642
0.00632376	0.00362145	0.00703055	0.00438517	0.00490873	0.00544056	0.00427884	0.00485274	0.0277583	0.00407462	0.92238	0.00494525
0.0988639	0.00274214	0.00640323	0.00300105	0.00377094	0.00505201	0.00207133	0.00196489	0.0125137	0.00974754	0.797155	0.0567139
0.0634213	0.00377961	0.00540037	0.00416777	0.00485777	0.007054	0.00449221	0.00297909	0.00625114	0.00536517	0.884938	0.00729402
0.0896414	0.00367948	0.0064826	0.00296836	0.00550409	0.00351722	0.00396088	0.00400203	0.00625676	0.00408491	0.865869	0.00403376
0.315076	0.00951425	0.0601186	0.00499721	0.00460167	0.11657	0.0043792	0.00490172	0.343541	0.0453251	0.0805422	0.0104335
0.0136321	0.00360005	0.00758658	0.00373016	0.00550096	0.00500088	0.00383058	0.00357946	0.00396315	0.00392153	0.940946	0.00470867
0.0237896	0.00348011	0.00605087	0.00398963	0.00546895	0.00446978	0.00334826	0.00362276	0.00372445	0.00379796	0.930021	0.00823682
0.0077839	0.00325314	0.00701077	0.0035777	0.00626809	0.00426888	0.00395382	0.00411357	0.00456882	0.00380588	0.945437	0.00595806
0.0149237	0.00340044	0.00683767	0.00491371	0.00493785	0.0049065	0.00351631	0.00375215	0.00399941	0.00407418	0.936461	0.00827715
0.013611	0.0053895	0.0343039	0.005914	0.0136797	0.00619849	0.00344686	0.0135075	0.00653028	0.0193638	0.869762	0.00829239
0.010567	0.00380558	0.00734417	0.00319713	0.00563821	0.00513967	0.00363276	0.00369391	0.00392609	0.00389328	0.943253	0.00590876
0.0123926	0.0036791	0.00719759	0.00365697	0.00543762	0.00522397	0.00361051	0.00372711	0.00469461	0.00383972	0.939821	0.00671944
0.0154166	0.00380253	0.00700391	0.00379287	0.0053316	0.0049661	0.00349815	0.00338533	0.00350795	0.00386333	0.938669	0.00676251
0.0208221	0.00360005	0.0068032	0.00401495	0.0050268	0.00452356	0.00319232	0.00397149	0.00405248	0.00385547	0.933332	0.00680516
0.13729	0.0044207	0.00510193	0.00616704	0.00453239	0.00785003	0.00608026	0.00553886	0.0308769	0.00984722	0.771548	0.0107469
0.0336369	0.00261694	0.00419873	0.0257302	0.00360854	0.108339	0.00129376	0.00317048	0.0190214	0.0463794	0.734924	0.0170806
0.0718749	0.00289564	0.00581452	0.00322274	0.0130916	0.0120129	0.00452094	0.00761757	0.0155284	0.00517417	0.85547	0.00277707
0.378315	0.00445532	0.00286321	0.0125061	0.00676047	0.0542065	0.0178798	0.00717931	0.0381594	0.018192	0.449307	0.010176
0.00776492	0.00331385	0.00788174	0.00373874	0.00579056	0.00532696	0.00366415	0.00520281	0.00525788	0.00367219	0.942624	0.00576183
0.312489	0.0120384	0.0086834	0.0157538	0.00342244	0.00448382	0.0216004	0.0347733	0.0791954	0.0896807	0.378291	0.0395885
0.218987	0.0036015	0.00498612	0.00257662	0.00499194	0.00635902	0.00322377	0.00177474	0.00560045	0.00317833	0.740266	0.00445454
0.00684842	0.00352418	0.00698753	0.00420559	0.00505354	0.00494062	0.00427701	0.00507739	0.0199223	0.00405912	0.929057	0.0060471
0.0300797	0.00370437	0.00586906	0.00628404	0.00547854	0.00382274	0.00354135	0.00303607	0.0170749	0.00515703	0.889535	0.0264174
0.488831	0.00264584	0.00374478	0.00509017	0.00398874	0.00594146	0.00564837	0.00352459	0.0295832	0.0190218	0.427508	0.00447224
0.0178518	0.00418998	0.00534615	0.00492342	0.0043104	0.0036989	0.00427875	0.0034134	0.0279092	0.00852891	0.88745	0.0280995
0.30631	0.00469081	0.00521296	0.00290595	0.00193271	0.00176713	0.00197401	0.00294737	0.0302421	0.00780033	0.618168	0.0160484
0.0111348	0.00355363	0.00719437	0.00342485	0.00576017	0.00582825	0.00387582	0.00422905	0.00442447	0.00382254	0.939942	0.00681036
0.00794632	0.00374745	0.00612936	0.00295033	0.00537244	0.00455183	0.00333207	0.00288005	0.00463404	0.00448148	0.945029	0.0089452
0.527903	0.00318737	0.00459995	0.0041042	0.00460076	0.00610385	0.00660423	0.00366776	0.0165098	0.00597854	0.410557	0.00618304
0.377126	0.00454907	0.00624312	0.00291584	0.00213967	0.00411057	0.00241281	0.00317645	0.0975497	0.00769558	0.482783	0.00929778
0.0544658	0.00409927	0.00503077	0.00556114	0.00679762	0.036215	0.0145748	0.0153764	0.0555581	0.0138524	0.778731	0.00973756
0.00662608	0.00399441	0.00682071	0.00421026	0.00490037	0.00501268	0.00425408	0.0046937	0.0149917	0.00397298	0.935216	0.00530743
0.877762	0.00282565	0.00584468	0.0030606	0.00597539	0.00465068	0.00705912	0.00548367	0.00481193	0.00933779	0.0705829	0.00260561
0.00658161	0.00372446	0.00723594	0.00408499	0.00495395	0.00502384	0.00418939	0.00468899	0.0117194	0.00389545	0.938748	0.00515395
0.0189181	0.0034733	0.00690474	0.00346788	0.00569974	0.00477223	0.00349661	0.00353805	0.00404012	0.00381421	0.933593	0.00828158
0.00736016	0.00310094	0.00590718	0.00681945	0.0139751	0.0134758	0.00314559	0.00310573	0.00489933	0.00378908	0.928378	0.00604314
0.594291	0.00480687	0.00369021	0.00481286	0.00266666	0.0146006	0.00653257	0.00512189	0.0526533	0.0565807	0.245609	0.00863413
0.00691934	0.0036419	0.00715017	0.00382903	0.0054124	0.00476457	0.00399231	0.00448886	0.00671645	0.0039181	0.943408	0.00575893
0.00668506	0.00364318	0.0071784	0.00369257	0.00492073	0.00478795	0.00425717	0.00482789	0.0107868	0.00451836	0.938374	0.0063274
0.0352915	0.00347564	0.00603749	0.00407025	0.00527373	0.00478638	0.00292264	0.00333597	0.00416314	0.00421829	0.906301	0.0201239
0.0369128	0.00444696	0.00553682	0.00292591	0.00395593	0.00258526	0.00298961	0.00314977	0.0727305	0.0040078	0.851274	0.00948452
0.0158274	0.000552227	0.123643	0.00379017	0.0060356	0.00741248	0.00709967	0.027956	0.0784217	0.0372706	0.643238	0.0487534
0.245729	0.00368762	0.00500679	0.00334508	0.00545098	0.00473914	0.00192235	0.00158395	0.00511158	0.00305838	0.711723	0.00864231
0.222327	0.00445178	0.00489798	0.00328629	0.00288211	0.00397009	0.00660448	0.00360554	0.0674956	0.00482983	0.667642	0.00800791
0.0238531	0.00527411	0.00509138	0.0255418	0.0063992	0.0383528	0.00589839	0.023028	0.0352043	0.00635309	0.789524	0.03548
0.115969	0.00529081	0.00700846	0.00676699	0.00219061	0.00366947	0.00261209	0.00486299	0.0300817	0.00853833	0.725281	0.0877286
0.029756	0.00381984	0.00491361	0.00449607	0.00434649	0.00433897	0.00259935	0.00237444	0.00569927	0.00405489	0.908459	0.0251423
0.0162215	0.00315598	0.00641413	0.00382638	0.0055343	0.00336724	0.00336165	0.00274392	0.0130451	0.00434457	0.922419	0.0155659
0.354364	0.00426245	0.00487615	0.00464009	0.00460753	0.00753712	0.00497457	0.00327704	0.00667505	0.00495794	0.597118	0.00271023
0.0137603	0.00362625	0.00587345	0.00415078	0.00580604	0.00596756	0.00335125	0.00263949	0.00433342	0.00395255	0.929254	0.0172851
0.00754768	0.0035902	0.00747242	0.0039422	0.00543247	0.00515757	0.00385182	0.00515267	0.00645032	0.0036917	0.942122	0.00558855
0.526346	0.00479646	0.00629784	0.00362679	0.00315599	0.0121722	0.00527962	0.0064159	0.010509	0.0239108	0.394423	0.00306653
0.142139	0.00445331	0.00421303	0.00721749	0.00514734	0.00984935	0.00403321	0.00478164	0.0405137	0.0418515	0.674279	0.0615209
0.0111023	0.00406347	0.00640615	0.00482687	0.00683744	0.00956098	0.00748588	0.00518484	0.0481628	0.00409393	0.887524	0.00475138
0.177472	0.00622532	0.080551	0.00121285	0.001235	0.0258628	0.0129473	0.0066698	0.163076	0.0601785	0.446824	0.0177451
0.014662	0.00314102	0.0110199	0.00342589	0.00516779	0.00401202	0.00219745	0.00159708	0.00495107	0.00550189	0.855737	0.0885867
0.320117	0.00678811	0.0108384	0.00101567	0.0933921	0.00414697	0.036733	0.0496091	0.0105007	0.3003	0.154292	0.0122666
0.226134	0.00570954	0.00674757	0.0212234	0.0114716	0.0650638	0.0079811	0.0461483	0.0584152	0.0407067	0.50378	0.00661841
0.155215	0.00530057	0.0101327	0.00109812	0.0103021	0.0245382	0.00344527	0.00431395	0.00417466	0.0259096	0.751858	0.00371194
0.05055	0.00351234	0.00547566	0.00302177	0.00510845	0.00445853	0.00347914	0.00295663	0.00516934	0.00365033	0.906453	0.00616521
0.246406	0.0033292	0.00518758	0.00261478	0.00594508	0.00438085	0.0044912	0.00236241	0.00795377	0.00594766	0.704926	0.00645571
0.229274	0.00954218	0.0329138	0.0203149	0.00114033	0.010515	0.00564714	0.0214162	0.168777	0.0656967	0.393641	0.0411213
0.369673	0.00463308	0.00483144	0.00254482	0.00350987	0.00172715	0.00177746	0.00194155	0.020108	0.00456882	0.578019	0.00666598
0.0430599	0.00736288	0.00909113	0.00647762	0.00219929	0.00156509	0.00343012	0.00631933	0.0915806	0.0279621	0.65772	0.143232
0.461663	0.00348884	0.00347695	0.00601093	0.0041699	0.00753912	0.00467095	0.00349874	0.0186692	0.0112903	0.453583	0.0219384
0.0266085	0.00436183	0.00490227	0.00470235	0.00457808	0.00283087	0.00317633	0.00317022	0.0149327	0.00576302	0.880824	0.0441497
0.1974	0.00498252	0.00467501	0.00566452	0.00307841	0.00350184	0.00304967	0.00375572	0.0199227	0.00951847	0.733688	0.0107636
0.0362847	0.00340354	0.00718201	0.00533727	0.00523087	0.00565251	0.0033812	0.00466036	0.00499016	0.00361531	0.910908	0.0093543
0.00863122	0.00302323	0.00596796	0.00320601	0.00568998	0.00336983	0.00334391	0.00311609	0.00842304	0.00421056	0.935715	0.0153035
0.0254589	0.00320343	0.00766477	0.00283565	0.00566118	0.00416034	0.00354977	0.00380547	0.00625452	0.00407245	0.927624	0.00570944
0.349658	0.00464394	0.00502508	0.0045964	0.00324247	0.00695926	0.00867279	0.00502421	0.0263911	0.0130095	0.563423	0.00935477
0.119753	0.00669429	0.00391562	0.0369978	0.00691085	0.0437316	0.0288687	0.0208516	0.0793863	0.0181052	0.618367	0.0164179
0.117222	0.00368563	0.00512087	0.00354948	0.00439226	0.0049279	0.00307094	0.00277829	0.0131696	0.00946329	0.795787	0.0368322
0.00681102	0.00352315	0.00593112	0.0042828	0.00531149	0.00391686	0.00385808	0.00367622	0.00696456	0.00430722	0.940158	0.0112595
0.00944866	0.00359417	0.00635122	0.00330293	0.00534578	0.00470361	0.00383014	0.00430837	0.00593897	0.00402848	0.944112	0.00503525
0.498128	0.00338115	0.00363919	0.00178232	0.00324199	0.00278363	0.00346807	0.0018203	0.0258036	0.0142277	0.366581	0.0751429
0.012444	0.00326369	0.00701775	0.00506133	0.0145673	0.00667465	0.00512836	0.00405009	0.00536747	0.00356237	0.925122	0.00774137
0.0367725	0.00401843	0.00501782	0.00415018	0.0117768	0.0464904	0.0316702	0.0240158	0.0569936	0.00895132	0.766	0.00414343
0.00911563	0.00347268	0.00583547	0.00521242	0.0055346	0.00535692	0.00377449	0.0043763	0.00486184	0.00429	0.94064	0.00752917
0.010388	0.00228177	0.00621628	0.0046047	0.00627411	0.00666859	0.00318933	0.00390591	0.00551869	0.00332296	0.930762	0.0168675
0.201017	0.00324877	0.00637912	0.00335354	0.00544206	0.0072849	0.00455332	0.00343014	0.0104611	0.00431338	0.747255	0.00326144
0.520658	0.00400508	0.00540042	0.00851402	0.0286388	0.0142496	0.00877705	0.0356134	0.090871	0.0414699	0.229162	0.0126408
0.458029	0.00504596	0.00370995	0.0109178	0.00498031	0.0611055	0.00549975	0.0387564	0.0929436	0.0510891	0.230308	0.0376143
0.319979	0.00411592	0.00449869	0.00301782	0.0056539	0.00125565	0.00300215	0.00151355	0.00776441	0.00417354	0.640344	0.00468202
0.471276	0.00417573	0.00362293	0.00516462	0.00137112	0.00400046	0.00254909	0.00267742	0.0976871	0.0273551	0.321621	0.0584997
0.257961	0.00359921	0.00496138	0.0100429	0.0366398	0.010584	0.00600124	0.00333883	0.0251774	0.00923632	0.591365	0.0410934
0.330107	0.00544244	0.0252578	0.00170161	0.00128351	0.00125439	0.00193243	0.0119548	0.280776	0.0527699	0.280263	0.00725773
0.013713	0.00425906	0.00514432	0.00690913	0.0205873	0.0433411	0.00687809	0.00892208	0.0832864	0.0629256	0.646453	0.0975812
0.271185	0.00535884	0.00476446	0.00453424	0.00224826	0.00774503	0.0105284	0.00669988	0.124669	0.0282709	0.522285	0.0117114
0.278887	0.00391236	0.00466275	0.00448683	0.00463851	0.00912193	0.00434046	0.00324529	0.00725862	0.00814831	0.665511	0.00578712
0.470694	0.00303234	0.00487773	0.00277315	0.00263571	0.00190537	0.00219772	0.00307771	0.0828154	0.0101919	0.366934	0.048865
0.470227	0.00402403	0.00169425	0.0191461	0.00377656	0.211875	0.0165328	0.0122984	0.01505	0.0125115	0.121992	0.110873
0.058866	0.00348223	0.00662914	0.0128119	0.0049989	0.0531625	0.0546876	0.0367927	0.168847	0.0207706	0.502167	0.076784
0.329213	0.00135614	0.00248457	0.143999	0.0308645	0.0688909	0.0286054	0.00457086	0.0330826	0.0338144	0.316709	0.00641003
0.184867	0.00564701	0.00536865	0.00785287	0.00156911	0.0174002	0.0074103	0.0147643	0.235788	0.0438573	0.427517	0.0479583
0.523155	0.00165475	0.00265129	0.00190454	0.00456119	0.133249	0.00165401	0.00450934	0.0288772	0.0243887	0.202324	0.0710714
0.00911722	0.00436508	0.00757878	0.00596179	0.00473324	0.00432206	0.00409755	0.00409102	0.0207678	0.00594568	0.916398	0.0126222
0.348119	0.00161236	0.00359394	0.00176688	0.00452238	0.020405	0.000594162	0.00159889	0.00735921	0.00221473	0.568639	0.0395746
0.483609	0.0033571	0.00426097	0.00385485	0.00424295	0.0041085	0.00408691	0.00226609	0.0122307	0.0077762	0.461375	0.0088318
0.127796	0.00372138	0.00604271	0.0223001	0.00443762	0.0334946	0.00309308	0.0239465	0.0708212	0.0161119	0.68346	0.0047752
0.405257	0.00368375	0.00718459	0.00214089	0.00134241	0.0019003	0.00249481	0.00391912	0.0552019	0.0140284	0.497534	0.00531267
0.329779	0.00415862	0.0044492	0.00407513	0.00203677	0.00170656	0.00177088	0.00271742	0.0541359	0.00685764	0.537035	0.0512782
0.332844	0.00262335	0.00629147	0.00357672	0.00478867	0.00916749	0.00495928	0.00335153	0.0104358	0.00447319	0.615367	0.00212233
0.244488	0.00392189	0.00483294	0.00411343	0.00503651	0.00450357	0.00418198	0.00222047	0.0138648	0.00716635	0.694327	0.0113424
0.00719912	0.00358297	0.00602305	0.00391378	0.00606784	0.00558459	0.00390731	0.00368781	0.00475031	0.00385651	0.946217	0.00520965
0.455235	0.00470455	0.0038055	0.00362946	0.00318023	0.00535328	0.00426312	0.00386785	0.0149496	0.00506965	0.492074	0.00386705
0.49948	0.00405422	0.00363689	0.00384171	0.00922086	0.0136936	0.00263523	0.00323844	0.00710999	0.00321418	0.44768	0.00219536
0.341599	0.000619501	0.00810602	0.00207277	0.00714696	0.135355	0.00350779	0.00237586	0.0268648	0.0240707	0.42872	0.0195619
0.114648	0.00389949	0.0123241	0.00182369	0.0460267	0.00395604	0.0192278	0.101726	0.0494473	0.012467	0.633049	0.00140542
0.138995	0.00373449	0.00577607	0.00413922	0.00623719	0.00730267	0.00546851	0.00477986	0.038748	0.0205171	0.75872	0.00558234
0.0146971	0.00152223	0.00749505	0.0199235	0.0113819	0.0435302	0.000462271	0.00551658	0.27607	0.00614443	0.572704	0.0405526
0.486846	0.00302123	0.00459673	0.00358274	0.00265011	0.00835912	0.00517274	0.00520433	0.0263729	0.0188013	0.427517	0.00787581
0.0309765	0.00374278	0.0071097	0.00336734	0.00542261	0.0050824	0.00294851	0.00265134	0.00351205	0.00404526	0.916625	0.0145167
0.0233998	0.00375984	0.00722046	0.0047965	0.00525489	0.0054031	0.00342684	0.00419168	0.00477659	0.00412323	0.924045	0.00960166
0.179563	0.00544207	0.00592253	0.00745086	0.00265153	0.00291438	0.00453275	0.00373062	0.133196	0.0194388	0.594356	0.0408006
0.00682578	0.00387277	0.00705683	0.00390055	0.00511406	0.00491085	0.00414805	0.00476537	0.00854509	0.00398976	0.941374	0.00549716
0.0711332	0.00435175	0.0279234	0.0337778	0.00213217	0.0805728	0.0347707	0.0140046	0.202654	0.0413508	0.386337	0.100992
0.495876	0.00286975	0.00420276	0.00357677	0.00315435	0.017084	0.00396967	0.00527726	0.00800539	0.0284906	0.403201	0.0242918
0.0512239	0.00369477	0.00573293	0.00386466	0.0045014	0.00437731	0.00343452	0.00316759	0.00700704	0.00345375	0.902744	0.00679858
0.0249122	0.00457967	0.00615012	0.0029509	0.00598158	0.00593016	0.00363449	0.00276716	0.00302428	0.00397449	0.931912	0.00418275
0.00558165	0.00355642	0.00899166	0.00356591	0.00536809	0.00590918	0.00416842	0.00347226	0.0114301	0.00383722	0.940464	0.00365537
0.0390518	0.00370616	0.00670004	0.00351913	0.00415048	0.00682025	0.0038924	0.00226298	0.0122175	0.00494023	0.901818	0.0109208
0.0121062	0.00401164	0.150521	0.0764415	0.00327759	0.062203	0.00708021	0.00695307	0.0572753	0.0256934	0.588021	0.00641612
0.219871	0.0042676	0.00523839	0.0055099	0.00354441	0.00365314	0.00481708	0.0044675	0.0151532	0.00803864	0.707105	0.0183341
0.587374	0.00436334	0.00511171	0.00329941	0.0124205	0.0381076	0.00434061	0.00629826	0.0497603	0.0173757	0.260789	0.0107598
0.00908	0.003609	0.00861325	0.00415398	0.00489581	0.00423554	0.00376365	0.00422454	0.0154193	0.00461895	0.925544	0.0118416
0.330339	0.000846555	0.00731181	0.0031735	0.0032315	0.00611208	0.00246439	0.00177047	0.0226957	0.00261794	0.614273	0.00516322
0.384129	0.00140323	0.0188684	0.0806161	0.000146044	0.135388	0.0033081	0.0259703	0.044945	0.0144928	0.277674	0.0130594
0.101624	0.00106498	0.0201896	0.0578733	0.0824419	0.0697921	0.0436924	0.118464	0.162259	0.0294975	0.275652	0.0374495
0.373438	0.00503073	0.00814909	0.0115856	0.0122153	0.0235697	0.00446439	0.0108584	0.134539	0.0276251	0.384242	0.00428366
0.102416	0.036208	0.0130234	0.00991829	0.0017533	0.00217871	0.00507736	0.0289349	0.235791	0.0958165	0.336184	0.132699
0.124433	0.0177817	0.0141366	0.0126947	0.00461665	0.00633697	0.0253503	0.0295727	0.0744022	0.0892808	0.589727	0.0116678
0.32035	0.000921204	0.00896448	0.00316453	0.00328024	0.00316217	0.00187306	0.00139337	0.0509997	0.00667834	0.55366	0.0455528
0.0161997	0.00402608	0.00634163	0.00592039	0.0050926	0.00640759	0.00448938	0.00420491	0.00753634	0.00431752	0.930094	0.00536974
0.461227	0.00417278	0.00509111	0.00410236	0.00449703	0.00329971	0.00290236	0.00262457	0.00782601	0.00381289	0.493961	0.00648388
0.691287	0.00225611	0.0027552	0.0161404	0.0042361	0.022996	0.00196018	0.0040054	0.0101109	0.0173313	0.220073	0.00684816
0.0436091	0.00429464	0.00666697	0.00454348	0.0074146	0.0160021	0.00902907	0.00589731	0.0468979	0.00508755	0.845458	0.00509908
0.385728	0.00308317	0.00394465	0.00307927	0.00805565	0.0165587	0.00750888	0.00278828	0.0160123	0.00445573	0.546908	0.00187733
0.382161	0.00384233	0.00718248	0.00145184	0.00286178	0.00383279	0.00542659	0.0033376	0.0162447	0.0113613	0.558383	0.0039144
0.135507	0.0105607	0.00367762	0.0859827	0.0200428	0.0885467	0.119422	0.0620865	0.0224491	0.358485	0.0874955	0.00574475
0.12854	0.00066989	0.0126196	0.00111928	0.0287768	0.0802578	0.0119915	0	0.00626215	0.0856251	0.579221	0.0649167

## Sheet: E02_A_Translation
NN outputs for markers (Translation)
Cytosol	ER	Golgi	Lysosome	Mitochondria	Nucleus	Peroxisome	PM	Endosome	LD	Protein-Complex	Translation
0.00669035	0.0537851	0.00867976	0.00597318	0.00727328	0.00557552	0.00203885	0.00020089	0.0667664	0.00539182	0.0427828	0.794842
0.00791716	0.00437379	0.0254326	0.00543493	0.0038281	0.00523179	0.00156942	0.00315728	0.0988161	0.00881943	0.0473878	0.788032
0.211195	0.0013068	0.00415581	0.00299899	0.00667706	0.00462045	0.00397864	0.000933724	0.141562	0.00374727	0.0166747	0.60215
0.00598518	0.0242494	0.0103125	0.0101053	0.00398963	0.00866876	0.00249275	0.00680073	0.0264556	0.00748382	0.01544	0.878016
0.0125235	0.00612647	0.00491367	0.112245	0.0311576	0.0265302	0.00278366	0.00456597	0.0867178	0.00482011	0.0612642	0.646352
0.00570374	0.0182275	0.00895502	0.0086787	0.00360162	0.00886309	0.00238123	0.00579135	0.0181117	0.00643785	0.0122025	0.901046
0.00547339	0.0165686	0.00762123	0.0111843	0.00139041	0.0212591	0.00234464	0.0107672	0.0289919	0.00854055	0.00984778	0.876011
0.690693	0.00323118	0.0121917	0.00617064	0.00432694	0.00547808	0.0034471	0.0039091	0.0496191	0.00968498	0.119969	0.0912793
0.00500816	0.0127335	0.00846751	0.00436803	0.00309487	0.0541564	0.00237989	0.00422214	0.0119003	0.0485037	0.0153861	0.82978
0.00779412	0.00106545	0.00799725	0.00540242	0.00535951	0.130338	0.00161767	0.00157123	0.0434206	0.00844797	0.467757	0.319228
0.00857205	0.00774618	0.0104365	0.00496676	0.00336791	0.00431399	0.00142246	0.00511853	0.203997	0.00922733	0.0206973	0.720134
0.00423074	0.0376137	0.00815739	0.00598784	0.00579469	0.00623395	0.002542	0.00156783	0.0759836	0.0073987	0.0262947	0.818195
0.00551226	0.00704724	0.00669456	0.00595187	0.00459289	0.00529021	0.00219882	0.00289153	0.0949109	0.00844098	0.035679	0.82079
0.0288677	0.0110432	0.0305466	0.011992	0.00463948	0.00810291	0.00286512	0.0068582	0.181021	0.006467	0.0717017	0.635895
0.00549798	0.0343857	0.00702061	0.0103043	0.00430222	0.0165071	0.00335858	0.00528539	0.030117	0.00650529	0.0249613	0.851755
0.00571048	0.0161936	0.00736419	0.00613737	0.00367292	0.0112342	0.0023661	0.00444766	0.0319188	0.00703409	0.0164143	0.887506
0.00285018	0.0672841	0.0229131	0.0515784	0.0121007	0.073099	0.11606	0.0482511	0.00832952	0.00361507	0.00371892	0.590199
0.0057079	0.00627001	0.00803757	0.00511828	0.00420509	0.00627489	0.0019302	0.00162758	0.166548	0.00949589	0.0174548	0.76733
0.00359124	0.175284	0.0589865	0.00370449	0.00185175	0.00751162	0.00327369	0.0480975	0.158635	0.0904868	0.00809467	0.440483
0.223779	0.00706849	0.0234412	0.00275484	0.0011554	0.0027093	0.00125769	0.0188027	0.35231	0.0201883	0.0149965	0.331537
0.00480209	0.021653	0.00971874	0.0246095	0.0036248	0.0258525	0.00233928	0.00421993	0.0103082	0.0077098	0.00853503	0.876627
0.00338953	0.0204344	0.0310995	0.0035745	0.00200194	0.0322079	0.00198197	0.00753282	0.041736	0.0797034	0.0364618	0.739876
0.00664141	0.0142587	0.00580985	0.0387996	0.00372936	0.0756763	0.00239051	0.00717344	0.0416981	0.00298304	0.0522785	0.748561
0.193236	0.000379712	0.0113768	0.000246253	0.000500435	0	0	0.00338047	0.593244	0.0299717	0.0303431	0.137321
0.00501879	0.00478264	0.0101144	0.0555962	0.018531	0.108405	0.00167586	0.00134201	0.0109964	0.026473	0.0154023	0.741662
0.00435232	0.0221595	0.00720919	0.00630527	0.00480903	0.0168888	0.00224016	0.00436897	0.0147012	0.0135861	0.00918993	0.89419
0.00496592	0.019663	0.00761196	0.00617928	0.00363634	0.0141587	0.002191	0.00399551	0.0182711	0.0161956	0.00948848	0.893643
0.00494666	0.0682978	0.00755944	0.00583628	0.00453291	0.0122942	0.00244071	0.00439563	0.0558168	0.00611516	0.0141854	0.813579
0.367073	0.00376636	0.00349585	0.00435913	0.00446652	0.00933599	0.00369217	0.108439	0.230103	0.028086	0.0244498	0.212734
0.00653956	0.0109471	0.0120675	0.00913889	0.00306351	0.0166743	0.00278757	0.0046447	0.0281118	0.00633311	0.0208726	0.878819
0.190439	0.00065707	0.00361924	0.00241046	0.001678	0.00776204	0.000613456	0.00327479	0.371369	0.0228079	0.087762	0.307607
0.0055866	0.0136824	0.0112901	0.00646072	0.00314556	0.0105975	0.00246182	0.00371815	0.0300667	0.00609968	0.0130023	0.893889
0.00680908	0.0183272	0.00818288	0.00839121	0.00402368	0.0085051	0.00229138	0.00689813	0.0169331	0.00740145	0.0182355	0.894001
0.00215598	0.0161664	0.156871	0.00656761	0.00418622	0.0115068	0.00379188	0.00259036	0.0472509	0.00764245	0.0434844	0.697786
0.00564863	0.0122951	0.0074166	0.00635126	0.00404909	0.00945818	0.00217548	0.00356024	0.0186505	0.00724972	0.00934974	0.913795
0.0367456	0.0154644	0.00726798	0.00628313	0.0041277	0.00680058	0.00222232	0.00445323	0.029742	0.00811718	0.0259556	0.85282
0.00370148	0.104114	0.0284504	0.00439151	0.00494028	0.00692779	0.00274343	0.00338294	0.0139881	0.00703169	0.00657389	0.813755
0.00768612	0.009337	0.00537893	0.00714921	0.00350289	0.0115309	0.0024418	0.00445948	0.0220817	0.00653021	0.0135182	0.906384
0.00572217	0.0211832	0.00630358	0.00686052	0.00730447	0.00877441	0.00244859	0.00392714	0.0265064	0.00747147	0.0138271	0.889671
0.00485043	0.0213868	0.00744126	0.00621512	0.00367891	0.0120858	0.00224256	0.00451863	0.0170551	0.00848959	0.00899962	0.903036
0.0192169	0.00377359	0.0183584	0.00500041	0.00571562	0.00766048	0.00213153	0.00457409	0.171314	0.00791412	0.131019	0.623322
0.0113793	0.0273759	0.0183344	0.00921732	0.00109406	0.0980371	0.0196248	0.0216679	0.0106534	0.0947231	0.0407788	0.647114
0.00561496	0.0119148	0.00722808	0.00668301	0.00497934	0.0130284	0.00248896	0.00468263	0.0211026	0.0072986	0.0123508	0.902628
0.00607803	0.00721401	0.0275477	0.00554217	0.00327301	0.00403035	0.00127352	0.00440394	0.18591	0.0101838	0.0255785	0.718965
0.00949707	0.0173306	0.00400942	0.00562408	0.00413705	0.00547145	0.00198039	0.00363017	0.206251	0.00971365	0.015858	0.716497
0.00617379	0.0199417	0.0125752	0.00727162	0.00263669	0.00798609	0.00220637	0.00536673	0.0283728	0.00674291	0.0180478	0.882678
0.00544452	0.0122274	0.00757202	0.00691252	0.00410628	0.00869579	0.00231916	0.00399012	0.0179745	0.00649414	0.0106989	0.913565
0.239776	0.00503116	0.00667636	0.00346555	0.00109463	0.0020391	0.00174481	0.0328966	0.288924	0.0688698	0.0667998	0.282682
0.0556348	0.0178231	0.00336144	0.0131561	0.00359356	0.019387	0.00245923	0.00881481	0.137552	0.0127508	0.0434925	0.681974
0.0228715	0.0199211	0.00317087	0.00716852	0.00320456	0.0182739	0.00229673	0.00541259	0.109802	0.0118176	0.0296063	0.766454
0.197226	0.000880737	0.00244189	0.00272368	0.00497711	0.00296917	0.00317766	0.000967124	0.248047	0.00521823	0.0774003	0.453971
0.00560193	0.0167163	0.00525673	0.00669578	0.00393693	0.00751733	0.00242098	0.00393572	0.0219568	0.00714484	0.0143834	0.904433
0.00536486	0.041801	0.00956004	0.00970521	0.00641705	0.0105696	0.0025936	0.00353246	0.0283464	0.00691183	0.0134576	0.86174
0.00420072	0.0344826	0.00648589	0.00734704	0.00363606	0.00808319	0.00231811	0.00378056	0.0286726	0.00668451	0.00956555	0.884743
0.00654065	0.0625899	0.00586505	0.0117442	0.00452403	0.00920114	0.00236758	0.00395084	0.081467	0.00703891	0.0117276	0.792983
0.0102267	0.00812663	0.00459759	0.00527731	0.00392511	0.00570463	0.00193171	0.00471632	0.222366	0.0107845	0.0165128	0.705831
0.184974	0.0329341	0.0238761	0.00278946	0.000839385	0.00340969	0.00237144	0.0463065	0.284337	0.0528364	0.0159514	0.349374
0.00550246	0.0142858	0.0060859	0.00658261	0.00465996	0.0101797	0.00257728	0.00411243	0.0243424	0.00698396	0.0123583	0.902329
0.00547526	0.0161867	0.00584401	0.00715275	0.00321962	0.00929719	0.00250111	0.00524381	0.0359817	0.00710296	0.0118051	0.89019
0.00824351	0.0153231	0.00996949	0.0103785	0.00506783	0.00943863	0.00268451	0.00712327	0.0172033	0.00804529	0.046643	0.859879
0.00525476	0.0222275	0.0074553	0.00585642	0.0038067	0.00825236	0.00212372	0.00360138	0.0208047	0.00665981	0.00848231	0.905475
0.00548959	0.0218936	0.00819166	0.00654287	0.00465897	0.0093078	0.00228897	0.00418739	0.0257763	0.00752442	0.0121362	0.892002
0.0253996	0.0107599	0.00436118	0.00596851	0.00323334	0.00517742	0.00284917	0.0136254	0.208957	0.0169387	0.0265775	0.676153
0.00506963	0.0141826	0.00840171	0.00775013	0.00332137	0.00912955	0.00235866	0.0046495	0.0199495	0.00627412	0.00914941	0.909764
0.00593512	0.0506295	0.00796241	0.00629592	0.00448662	0.00863654	0.00236093	0.00359383	0.028391	0.00633935	0.00933812	0.866031
0.00473067	0.0782431	0.00781306	0.0174919	0.00365791	0.0130706	0.00265575	0.00453539	0.0356151	0.0056845	0.0100663	0.816436
0.00555544	0.0225963	0.00727598	0.00631325	0.00414547	0.011855	0.00226406	0.00441591	0.017327	0.00915054	0.0100117	0.899089
0.423379	0.00672363	0.00144174	0.0070139	0.00695072	0.0467809	0.00388916	0.00546956	0.0311548	0.0167917	0.4439	0.00650444
0.00730944	0.0244903	0.0117957	0.0114017	0.00349691	0.00853732	0.0027121	0.00657527	0.0273282	0.00622918	0.0255058	0.864618
0.00531493	0.0458495	0.00788249	0.00727206	0.00400425	0.00826752	0.00234359	0.00486349	0.0281673	0.0065364	0.00903618	0.870462
0.00498346	0.0142875	0.00659477	0.00580318	0.00403121	0.00869459	0.00221109	0.00388938	0.0141557	0.00653359	0.00907688	0.919739
0.00713469	0.00874736	0.00491754	0.00576509	0.00417415	0.00600269	0.00211642	0.00316367	0.188128	0.0087754	0.0128203	0.748255
0.00488511	0.00511103	0.0137958	0.00471708	0.00505936	0.00169335	0.00233618	0.00133499	0.0889043	0.00900845	0.277082	0.586072
0.0046063	0.0303088	0.0100914	0.0137508	0.00259352	0.00993479	0.00251198	0.00655765	0.0445019	0.00611907	0.00967216	0.859352
0.00609745	0.0147933	0.00886873	0.0061119	0.00449522	0.0144835	0.00225618	0.00350121	0.0212364	0.0192189	0.0173146	0.881623
0.00557267	0.0401665	0.00995083	0.00560648	0.0045636	0.0104352	0.00223199	0.00452593	0.0236691	0.00854047	0.00854456	0.876193
0.0055079	0.0163422	0.00748963	0.00610897	0.00447997	0.0073207	0.00221502	0.00364834	0.0277918	0.00631632	0.0092003	0.903579
0.00470677	0.0419642	0.00937512	0.00494261	0.00398135	0.00900422	0.00222953	0.00372596	0.0192409	0.00664297	0.0084862	0.8857
0.00568505	0.0170502	0.00716055	0.00511256	0.00415914	0.00979094	0.00219638	0.00365666	0.0152475	0.00739765	0.00917988	0.913363
0.00530485	0.0150577	0.00567852	0.00647604	0.00389943	0.00865248	0.00238237	0.00421349	0.023648	0.00673286	0.0109416	0.907013
0.00448425	0.109189	0.0206255	0.00808121	0.0140365	0.00729215	0.00340911	0.0253973	0.0602597	0.0155817	0.00721684	0.724427
0.0060415	0.0140904	0.00731159	0.00638879	0.00424448	0.00719967	0.00223926	0.00481021	0.0172261	0.00725724	0.0121729	0.911018
0.00465592	0.0403297	0.00803497	0.00717291	0.00370841	0.015914	0.0026218	0.00432564	0.0201802	0.00635059	0.0110275	0.875678
0.0150608	0.00369161	0.00690906	0.0126413	0.00650837	0.0100112	0.00358132	0.00543465	0.217623	0.00668922	0.186007	0.525843
0.0053256	0.00900656	0.00990586	0.00574912	0.00445993	0.0444999	0.0023062	0.00596374	0.0272992	0.0121685	0.0100928	0.863223
0.0626466	0.0714219	0.0106263	0.0181527	0.00242738	0.0359289	0.00377341	0.0925343	0.21034	0.0428773	0.0244218	0.424849
0.00532087	0.0110934	0.0302462	0.00494452	0.00357644	0.00386168	0.00130934	0.00324718	0.140042	0.00858883	0.0158331	0.771936
0.0224586	0.00846036	0.0181958	0.00717386	0.00559961	0.0212812	0.0171932	0.0194477	0.197264	0.0115864	0.101239	0.570101
0.00566198	0.0152772	0.00793717	0.00948394	0.00301442	0.0100078	0.00253676	0.00491393	0.0248852	0.00659677	0.0198261	0.889859
0.132976	0.00590572	0.0182513	0.00498505	0.00261313	0.00388376	0.00179119	0.00757985	0.211325	0.0264019	0.0950084	0.489279
0.00703788	0.023908	0.00753711	0.00733439	0.00418701	0.00877408	0.00247962	0.00442277	0.0309547	0.00700471	0.0177965	0.878563
0.00683803	0.0173382	0.0051127	0.00563146	0.0037907	0.00995363	0.0025749	0.00650176	0.0481695	0.0112539	0.00886946	0.873966
0.00419354	0.0331957	0.00891746	0.007237	0.00315637	0.0077623	0.00210717	0.00405494	0.0206002	0.00659354	0.00808435	0.894097
0.00582771	0.0531893	0.00935253	0.0121491	0.00261527	0.016267	0.00268987	0.00661703	0.0720057	0.00726899	0.0125943	0.799423
0.00524715	0.0400079	0.0106517	0.010575	0.00375248	0.0083826	0.00242989	0.00697217	0.0265987	0.00833469	0.0108137	0.866234
0.00612717	0.0139311	0.00592906	0.00597866	0.00408637	0.00687011	0.00229199	0.00386304	0.0335943	0.00694404	0.0100703	0.900314
0.00535111	0.012084	0.00594184	0.00637953	0.00426393	0.00794767	0.00233839	0.00385547	0.0193078	0.00669687	0.0166733	0.90916
0.00564781	0.027657	0.00734119	0.00787497	0.00455949	0.0130345	0.00258656	0.00618103	0.0278804	0.00845196	0.0130833	0.875702
0.00553864	0.0178125	0.00782903	0.0110189	0.00412827	0.0111106	0.00252983	0.00621569	0.0191886	0.00669595	0.0131381	0.894794
0.0870635	0.00842522	0.0111703	0.0548058	0.00840758	0.0231165	0.00253081	0.00461347	0.0323075	0.0151372	0.0462137	0.706208
0.00586249	0.0473957	0.0162601	0.0150997	0.00232471	0.0123065	0.00287925	0.00603278	0.0642472	0.00644126	0.0204635	0.800687
0.00606968	0.0274285	0.00732845	0.00653034	0.00408096	0.0105091	0.00203314	0.00443131	0.0407381	0.00856839	0.00942321	0.872859
0.00537086	0.0145123	0.00569529	0.00593722	0.00507603	0.00753382	0.00226675	0.00397016	0.0250159	0.00860912	0.0124057	0.903607
0.00565216	0.0270137	0.00823452	0.00727917	0.00423186	0.00994435	0.00225747	0.00385848	0.0182364	0.00726234	0.00952089	0.896509
0.0634681	0.0280301	0.0073034	0.00656428	0.00322031	0.00727772	0.00192985	0.00540108	0.0489986	0.0102322	0.0110075	0.806567
0.0033077	0.169342	0.0104634	0.0150919	0.00286885	0.0107965	0.00257671	0.007489	0.0549916	0.0123293	0.00433349	0.70641
0.00759777	0.00644222	0.0094428	0.00633573	0.00245748	0.0273642	0.00222083	0.00436063	0.0403245	0.0106296	0.0482402	0.834584
0.0034282	0.0777979	0.00757012	0.00757296	0.00525364	0.0260967	0.0023407	0.00567404	0.0273604	0.0121564	0.008804	0.815945
0.00504441	0.0143801	0.00756066	0.00724325	0.0035009	0.00996576	0.00239433	0.00448121	0.0265351	0.0063385	0.016192	0.896364
0.0048518	0.0646923	0.0103503	0.00662878	0.0039934	0.00747395	0.00225058	0.00505401	0.0229918	0.00611437	0.00767229	0.857926
0.00520641	0.0259621	0.00845347	0.00662833	0.00367662	0.00709488	0.00199073	0.0036632	0.0275091	0.00679413	0.00879534	0.894226
0.00313843	0.110267	0.00625643	0.0347891	0.0040615	0.0210934	0.00540926	0.0575574	0.025381	0.0102855	0.00505682	0.716704
0.00894861	0.0157	0.00807016	0.00723341	0.00557877	0.00837007	0.00225703	0.00496587	0.0150068	0.00733433	0.0786122	0.837923
0.00530742	0.0313513	0.0110855	0.00983984	0.00500797	0.00761995	0.00238979	0.00754321	0.0227395	0.00723187	0.0139223	0.875962
0.00610476	0.00952968	0.010269	0.00374857	0.00448746	0.00606538	0.00238115	0.00204099	0.127093	0.00806629	0.0127736	0.80744
0.142241	0.0204988	0.00302296	0.0296512	0.00321987	0.0745311	0.00469333	0.0411989	0.179347	0.0854809	0.160422	0.255692
0.00492213	0.0249009	0.00730857	0.006046	0.00362861	0.0186551	0.00227654	0.00470531	0.0215753	0.0137487	0.0104358	0.881797
0.0159677	0.0158176	0.00698122	0.00609005	0.00374761	0.0127504	0.00243297	0.0040647	0.19008	0.0201151	0.0367183	0.685235
0.142286	0.000826194	0.0109188	0.00222643	0.00158346	0.0110508	0.00212017	0.00709007	0.334873	0.0589455	0.0328326	0.395247
0.00505804	0.0257338	0.00710176	0.00623493	0.00393821	0.00974291	0.00231519	0.00371038	0.0176466	0.00642493	0.0089842	0.903109
0.0283422	0.027591	0.0196411	0.00485497	0.00144141	0.00271876	0.0010952	0.0226978	0.337956	0.0438756	0.0251289	0.484657
0.0403433	0.00880996	0.00180712	0.00669361	0.00351035	0.017676	0.00316072	0.00592585	0.155331	0.0199396	0.0783871	0.658415
0.00504969	0.00422315	0.0109518	0.00517861	0.00524302	0.00686599	0.00227888	0.00228227	0.0410887	0.00818813	0.118445	0.790205
0.00557737	0.00727425	0.0196483	0.00540496	0.00394056	0.00450047	0.00178051	0.00316896	0.143915	0.00919215	0.0212383	0.774359
0.0039948	0.0383345	0.0369945	0.00515589	0.00334431	0.014155	0.003104	0.00757544	0.0516813	0.0287394	0.0251459	0.781775
0.0126498	0.00890916	0.0265773	0.0035805	0.000968457	0.00329607	0.00110667	0.0126718	0.242318	0.0108048	0.0227396	0.654377
0.0227784	0.00776097	0.00524015	0.00803722	0.00247287	0.034341	0.00186477	0.00629716	0.211948	0.0176607	0.0618377	0.619761
0.00531927	0.0112033	0.0203299	0.00531814	0.00425194	0.00435584	0.00189926	0.0028928	0.149605	0.00835578	0.0184895	0.76798
0.0337617	0.0048185	0.00475886	0.00416192	0.00484899	0.0126247	0.00522094	0.00851878	0.286836	0.020659	0.139021	0.47477
0.0959172	0.00556542	0.00567539	0.00418906	0.00107799	0.00694588	0.00204173	0.00640714	0.25782	0.160576	0.0797847	0.373999
0.0329655	0.00493454	0.0105251	0.0058716	0.00501529	0.00488579	0.00226908	0.00999125	0.181843	0.0262874	0.0409076	0.674503
0.00700119	0.00788209	0.0178279	0.00865858	0.00285437	0.0519888	0.00359722	0.0073647	0.0192947	0.00918888	0.0213288	0.843013
0.00473246	0.00102827	0.186029	0.00076446	0.0160428	0.00878915	0.00388187	0.00756232	0.0935196	0.234651	0.0553493	0.38765
0.102662	0.00349916	0.00732006	0.0027473	0.00106846	0.0967043	0.000386515	0.00608681	0.0551428	0.00953281	0.205436	0.509414
0.00809443	0.0134437	0.0170431	0.00524974	0.00290089	0.00383597	0.00196963	0.00509648	0.233149	0.012345	0.0325254	0.664347
0.0050913	0.0219682	0.00656466	0.0100595	0.00326141	0.00869851	0.00252482	0.00650376	0.0320439	0.00668899	0.0100486	0.886546
0.211402	0.000938992	0.00237244	0.00350466	0.00414341	0.00224102	0.00209974	0.000802303	0.143287	0.00613067	0.211903	0.411174
0.04225	0.0126161	0.0388829	0.00677151	0.00331177	0.0334495	0.00312358	0.0244416	0.279287	0.0196415	0.0488005	0.487424
0.0486824	0.000874818	0.135639	0.000153974	0.00185539	0.00478394	0	0.0125431	0.417085	0.0468584	0.0381152	0.293409
0.0122306	0.0466327	0.00378885	0.0150412	0.0031525	0.0853311	0.0107563	0.029551	0.0882094	0.0941924	0.0225799	0.588534
0.00869594	0.00256987	0.0218434	0.0053329	0.00300187	0.00537262	0.000826589	0.0232155	0.186915	0.00657063	0.0293957	0.70626
0.00471862	0.0101476	0.0242296	0.019919	0.00513388	0.116298	0.00215237	0.0109758	0.0265518	0.00742724	0.00954285	0.762903
0.0451217	0.0244624	0.00519823	0.00945011	0.00236395	0.00907308	0.00446484	0.0338105	0.214798	0.078995	0.0999249	0.472337
0.00955938	0.0111539	0.0149346	0.00449145	0.00437527	0.00524322	0.00210225	0.00275917	0.114761	0.0149752	0.0404832	0.775162
0.0105303	0.0101666	0.00536063	0.00763929	0.00340416	0.0102682	0.00238046	0.00491953	0.0180881	0.0064203	0.0256607	0.895162
0.00691849	0.00641461	0.0101783	0.00527737	0.00527623	0.0249539	0.00221838	0.00281974	0.0134797	0.00609739	0.0185828	0.897783
0.00557207	0.0760093	0.0107787	0.00689226	0.00566821	0.00663845	0.00223035	0.00208803	0.0655692	0.00791726	0.0119591	0.798677
0.0527866	0.000453207	0.0110052	0.158604	0.00180501	0.245104	0.00249533	0.00161498	0.0179693	0.149659	0.0397118	0.318792
0.017088	0.00732792	0.00267706	0.0058941	0.00393327	0.00602946	0.00216404	0.00370933	0.179442	0.019252	0.109413	0.64307
0.00731557	0.0197628	0.0814256	0.00631719	0.00267539	0.0105767	0.00168132	0.00471467	0.0207448	0.0085582	0.00819191	0.828036
0.0109383	0.0205123	0.0358518	0.00499489	0.000938911	0.002874	0.001815	0.0339187	0.261706	0.0446685	0.018364	0.563418
0.00452692	0.00826374	0.0223651	0.00512169	0.00408391	0.00430523	0.0017662	0.00263726	0.144801	0.00819209	0.0156144	0.778323
0.0254359	0.000297959	0.026084	0.000842364	0.0037452	0.0666103	0	0	0.143225	0.0132786	0.153779	0.566702
0.00160159	0.102872	0.0114818	0.0426087	0.00914218	0.0196958	0.0114305	0.0570643	0.0266767	0.0078644	0.0672642	0.642297
0.022392	0.00650801	0.00485009	0.00613401	0.00434063	0.00740746	0.002173	0.00325327	0.0324802	0.00675983	0.0339005	0.869801
0.201322	0.00466972	0.00292085	0.00272135	0.00367935	0.00508963	0.000420657	0.00245939	0.151652	0.0362272	0.172581	0.416257
0.0447373	0.0134497	0.00525739	0.0117255	0.00248	0.0428963	0.00195386	0.0155015	0.165947	0.050616	0.0732101	0.572225
0.00399151	0.0872077	0.0196131	0.0733925	0.00578644	0.0150224	0.0095059	0.014195	0.0922506	0.00640403	0.0115846	0.661046
0.0122428	0.0342862	0.00425963	0.0163596	0.00244697	0.0484215	0.00316804	0.0151892	0.0689947	0.0200957	0.0141965	0.760339
0.314331	0.00135647	0.00287372	0.00100381	0.00189758	0.00399976	0.000353377	0.000409848	0.0671049	0.00359436	0.450508	0.152567
0.00585291	0.00412639	0.0101223	0.00549897	0.00475613	0.00479576	0.00220714	0.00149372	0.111117	0.00840561	0.058046	0.783579
0.00533422	0.0203164	0.00492637	0.00781262	0.00301082	0.0129963	0.00301098	0.00724576	0.0822214	0.0180432	0.0330694	0.802013
0.0790519	0.00747271	0.0126975	0.00132161	0.00136723	0.0652973	0.00110619	0.0283534	0.230112	0.238487	0.0192783	0.315454
0.00542897	0.0944873	0.0344652	0.00676	0.00281379	0.00466543	0.00229483	0.0100284	0.158888	0.011875	0.0116651	0.656628
0.0108956	0.00597187	0.00637072	0.00588774	0.00357051	0.0054427	0.00214625	0.00456599	0.227904	0.0106357	0.0318438	0.684766
0.00649667	0.0110335	0.00549906	0.007401	0.00319445	0.0109635	0.00244443	0.0045008	0.0276224	0.00635691	0.0108251	0.903662
0.137899	0.00234758	0.0233773	0.00313652	0.00532697	0.00476297	0.00170542	0.001687	0.119222	0.0134099	0.0941229	0.593002
0.00643529	0.00740282	0.00445851	0.00623801	0.00430757	0.00667703	0.00210847	0.0023134	0.0807956	0.00882095	0.0650584	0.805384
0.00584788	0.0238058	0.0147333	0.00375609	0.00834376	0.00829072	0.00194652	0.00395064	0.0239052	0.00643666	0.0088055	0.890178
0.00566411	0.0101962	0.00509518	0.00554558	0.00407883	0.00713703	0.0021866	0.00404663	0.0706431	0.00772742	0.0107301	0.866949

[truncated: 2 more sheets: E02_B, E02_C]
