# Supplementary material for: C-COMPASS: a user-friendly neural network tool profiles cell compartments at protein and lipid levels
Source: Nat Methods. 2025 Dec 4;23(1):118–30. doi: 10.1038/s41592-025-02880-3 (PMC12791020; doi:10.1038/s41592-025-02880-3)
Supplement: Supplementary file 24 — Comparison with Mulvey et al. [file 41592_2025_2880_MOESM24_ESM.xlsx]

## Sheet: E03_A
Class	lps_median_Fr.1	lps_median_Fr.10	lps_median_Fr.11	lps_median_Fr.12	lps_median_Fr.13	lps_median_Fr.14	lps_median_Fr.15	lps_median_Fr.16	lps_median_Fr.17	lps_median_Fr.18	lps_median_Fr.19	lps_median_Fr.2	lps_median_Fr.20	lps_median_Fr.3	lps_median_Fr.4	lps_median_Fr.5	lps_median_Fr.6	lps_median_Fr.7	lps_median_Fr.8	lps_median_Fr.9
Cytosol	1	0.0375417	0.131063	0.0611488	0.254365	0.053693	0.181338	0.0592412	0.146302	0.0300916	0.104146	0	0.0506579	0.0382956	0.00574159	0.0831077	0.0197286	0.109038	0.0189424	0.0992736
ER	0	0.152297	0.200513	0.704742	1	0.907532	0.811263	0.792447	0.446727	0.337897	0.442774	0.0102241	0.0894014	0.0173658	0.0439517	0.0561776	0.0663278	0.0696538	0.0871087	0.09767
Golgi	0	0.241015	0.287284	0.807397	1	0.867391	0.763505	0.853591	0.49768	0.451392	0.401307	0.0264799	0.130492	0.0162317	0.0672116	0.0759446	0.112989	0.0980924	0.151372	0.157782
Lysosome	0.00486736	0.276131	0.291501	0.838655	1	0.776342	0.648048	0.596728	0.406351	0.27864	0.322733	0.000711499	0.0741517	0.0101202	0.0501501	0.0910555	0.117694	0.108921	0.131005	0.144478
Mitochondria	0.000996356	0.116525	0.15526	0.465343	1	0.864661	0.728766	0.820422	0.544027	0.432772	0.391897	0	0.110348	0.00827941	0.031559	0.0337083	0.047969	0.0472728	0.0662053	0.0694919
Nucleus	0.727498	0.114077	0.118436	0.327807	0.339736	0.432516	0.316604	0.634619	0.404844	0.37377	0.492501	0	0.77894	0.002214	0.0212734	0.022429	0.0408405	0.0420827	0.0548632	0.0581467
Peroxisome	0.00132362	0.179687	0.206151	0.612019	1	0.926663	0.793825	0.922635	0.610129	0.469145	0.516458	0.0029642	0.134946	0.00919175	0.0453553	0.0396068	0.0737567	0.0564941	0.0895848	0.0849763
PM	0	0.598741	0.654429	0.898978	1	0.592385	0.417233	0.393095	0.299879	0.220852	0.195577	0.265139	0.0771487	0.193048	0.254795	0.317418	0.402542	0.466883	0.455418	0.500968
Chromatin	0.139367	0.154748	0.155254	0.503137	0.439547	0.591268	0.630385	1	0.689822	0.687302	0.787344	0	0.255037	0.00333368	0.0228814	0.0261371	0.0512913	0.0365748	0.0659181	0.0616707
Nucleolus	0.111297	0.198552	0.119895	0.383709	0.282709	0.495038	0.223385	0.69703	0.332214	0.461804	0.77685	0.00397174	1	0	0.0385031	0.0206954	0.0798058	0.0344044	0.0993424	0.0559139
Ribosome	0.0105324	0.201244	0.214564	0.710304	0.797135	1	0.597324	0.898716	0.58804	0.547322	0.474229	0.00116208	0.756658	0.00919247	0.0416761	0.0479759	0.0765145	0.0606215	0.113544	0.0840551

## Sheet: E03_B
LPS treatment
Compartment	F1 score
Cytosol	1
ER	0.887324
Golgi	0.655172
Lysosome	0.882883
Mitochondria	0.985
Nucleus	0.855346
Peroxisome	0.851852
PM	0.993007
Chromatin	0.960526
Nucleolus	0.835165
Ribosome	0.986842
weighted average	0.925919

## Sheet: E03_C
main compartments in control				main compartments in LPS treated				localization count in control				localization count in LPS treated
Class	Count	Percentage		Class	Count	Percentage		Localization Count	Count	Percentage		Localization Count	Count	Percentage
Cytosol	889	22.9		Cytosol	779	19.15		1 localization	1573	40.52		1 localization	1555	38.23
ER	409	10.54		ER	420	10.33		2 localizations	1532	39.46		2 localizations	1748	42.98
Golgi	178	4.59		Golgi	180	4.43		3 localizations	677	17.44		3 localizations	658	16.18
Lysosome	209	5.38		Lysosome	358	8.8		4 localizations	94	2.42		4 localizations	99	2.43
Mitochondria	551	14.19		Mitochondria	658	16.18		5 localizations	6	0.15		5 localizations	7	0.17
Nucleus	436	11.23		Nucleus	373	9.17
Peroxisome	33	0.85		Peroxisome	41	1.01
PM	566	14.58		PM	611	15.02
Chromatin	317	8.17		Chromatin	287	7.06
Nucleolus	158	4.07		Nucleolus	154	3.79
Ribosome	136	3.5		Ribosome	206	5.07

## Sheet: E03_D
CC Hierarchical Clusterin for LPS treatment
Cytosol	ER	Golgi	Lysosome	Mitochondria	Nucleus	Peroxisome	PM	Chromatin	Nucleolus	Ribosome
0	0	0	0	0	0	0	0.356915	0	0	0.643085
0	0	0	0	0	0	0	0.210738	0	0	0.789262
0	0	0	0	0	0	0	0.238969	0	0	0.761031
0	0	0	0	0	0	0	0.249274	0	0	0.750726
0	0	0	0	0	0	0	0.313292	0	0	0.686708
0	0	0	0	0	0	0	0.317093	0	0	0.682907
0	0	0	0	0	0	0	0.268714	0	0	0.731286
0	0	0	0	0	0	0	0.291445	0	0	0.708555
0	0	0	0	0	0	0	0.27869	0	0	0.72131
0	0	0	0	0	0	0	0.283228	0	0	0.716772
0	0	0	0	0	0	0	0.106576	0	0	0.893424
0	0	0	0	0	0	0	0	0	0	1
0	0	0	0	0	0	0	0	0	0	1
0	0	0	0	0	0	0	0	0	0	1
0	0	0	0	0	0	0	0	0	0	1
0	0	0	0	0	0	0	0	0	0	1
0	0	0	0	0	0	0	0	0	0	1
0	0	0	0	0	0	0	0	0	0	1
0	0	0	0	0	0	0	0	0	0	1
0	0	0	0	0	0	0	0	0	0	1
0	0	0	0	0	0	0	0	0	0	1
0	0	0	0	0	0	0	0	0	0	1
0	0	0	0	0	0	0	0	0	0	1
0	0	0	0	0	0	0	0	0	0	1
0	0	0	0	0	0	0	0	0	0	1
0	0	0	0	0	0	0	0	0	0	1
0	0	0	0	0	0	0	0	0	0	1
0	0	0	0	0	0	0	0	0	0	1
0	0	0	0	0	0	0	0	0	0	1
0	0	0	0	0	0	0	0	0	0	1
0	0	0	0	0	0	0	0	0	0	1
0	0	0	0	0	0	0	0	0	0	1
0	0	0	0	0	0	0	0	0	0	1
0	0	0	0	0	0	0	0	0	0	1
0	0	0	0	0	0	0	0	0	0	1
0	0	0	0	0	0	0	0	0	0	1
0	0	0	0	0	0	0	0	0	0	1
0	0	0	0	0	0	0	0	0	0	1
0	0	0	0	0	0	0	0	0	0	1
0	0	0	0	0	0	0	0	0	0	1
0	0	0	0	0	0	0	0	0	0	1
0	0	0	0	0	0	0	0	0	0	1
0	0	0	0	0	0	0	0	0	0	1
0	0	0	0	0	0	0	0	0	0	1
0	0	0	0	0	0	0	0	0	0	1
0	0	0	0	0	0	0	0	0	0	1
0	0	0	0	0	0	0	0	0	0	1
0	0	0	0	0	0	0	0	0	0	1
0	0	0	0	0	0	0	0	0	0	1
0	0	0	0	0	0	0	0	0	0	1
0	0	0	0	0	0	0	0	0	0	1
0	0	0	0	0	0	0	0	0	0	1
0	0	0	0	0	0	0	0	0	0	1
0	0	0	0	0	0	0	0	0	0	1
0	0	0	0	0	0	0	0	0	0	1
0	0	0	0	0	0	0	0	0	0	1
0	0	0	0	0	0	0	0	0	0	1
0	0	0	0	0	0	0	0	0	0	1
0	0	0	0	0	0	0	0	0	0	1
0	0	0	0	0	0	0	0	0	0	1
0	0	0	0	0	0	0	0	0	0	1
0	0	0	0	0	0	0	0	0	0	1
0	0	0	0	0	0	0	0	0	0	1
0	0	0	0	0	0	0	0	0	0	1
0	0	0	0	0	0	0	0	0	0	1
0	0	0	0	0	0	0	0	0	0	1
0	0	0	0	0	0	0	0	0	0	1
0	0	0	0	0	0	0	0	0	0	1
0	0	0	0	0	0	0	0	0	0	1
0	0	0	0	0	0	0	0	0	0	1
0	0	0	0	0	0	0	0	0	0	1
0	0	0	0	0	0	0	0	0	0	1
0	0	0	0	0	0	0	0	0	0	1
0	0	0	0	0	0	0	0	0	0	1
0	0	0	0	0	0	0	0	0	0	1
0	0	0	0	0	0	0	0	0	0	1
0	0	0	0	0	0	0	0	0	0	1
0	0	0	0	0	0	0	0	0	0	1
0	0	0	0	0	0	0	0	0	0	1
0	0	0	0	0	0	0	0	0	0	1
0	0	0	0	0	0	0	0	0	0	1
0	0	0	0	0	0	0	0	0	0	1
0	0	0	0	0	0	0	0	0	0	1
0	0	0	0	0	0	0	0	0	0	1
0	0	0	0	0	0	0	0	0	0	1
0	0	0	0	0	0	0	0	0	0	1
0	0	0	0	0	0	0	0	0	0	1
0	0	0	0	0	0	0	0	0	0	1
0	0	0	0	0	0	0	0	0	0	1
0	0	0	0	0	0	0	0	0	0	1
0	0	0	0	0	0	0	0	0	0	1
0	0	0	0	0	0	0	0	0	0	1
0	0	0	0	0	0	0	0	0	0	1
0	0	0	0	0	0	0	0	0	0	1
0	0	0	0	0	0	0	0	0	0	1
0	0	0	0	0	0	0	0	0	0	1
0	0	0	0	0	0	0	0	0	0	1
0	0	0	0	0	0	0	0	0	0	1
0	0	0	0	0	0	0	0	0	0	1
0	0	0	0	0	0	0	0	0	0	1
0	0	0	0	0	0	0	0	0	0	1
0	0	0	0	0	0	0	0	0	0	1
0	0	0	0	0	0	0	0	0	0	1
0	0	0	0	0	0	0	0	0	0	1
0	0	0	0	0	0	0	0	0	0	1
0	0	0	0	0	0	0	0	0	0	1
0	0	0	0	0	0	0	0	0	0	1
0	0	0	0	0	0	0	0	0	0	1
0	0	0	0	0	0	0	0	0	0	1
0	0	0	0	0	0	0	0	0	0	1
0	0	0	0	0	0	0	0	0	0	1
0	0	0	0	0	0	0	0	0	0	1
0	0	0	0	0	0	0	0	0	0	1
0	0	0	0	0	0	0	0	0	0	1
0	0	0	0	0	0	0	0	0	0	1
0	0	0	0	0	0	0	0	0	0	1
0	0	0	0	0	0	0	0	0	0	1
0	0	0.402994	0	0.363114	0	0	0	0.233893	0	0
0	0	0.596295	0	0.403705	0	0	0	0	0	0
0	0	0.571638	0	0.428362	0	0	0	0	0	0
0	0	0.572747	0	0.427253	0	0	0	0	0	0
0	0	0.324892	0	0.675108	0	0	0	0	0	0
0	0	0.412066	0	0.587934	0	0	0	0	0	0
0	0	0.411633	0	0.588367	0	0	0	0	0	0
0	0	0.38568	0	0.61432	0	0	0	0	0	0
0	0	0.393129	0	0.606871	0	0	0	0	0	0
0.452773	0	0	0	0.547227	0	0	0	0	0	0
0.479359	0	0	0	0.520641	0	0	0	0	0	0
0.493885	0	0	0	0.506114	0	0	0	0	0	0
0.505579	0	0	0	0.494421	0	0	0	0	0	0
0.325261	0	0	0	0.674739	0	0	0	0	0	0
0.303714	0	0	0	0.696286	0	0	0	0	0	0
0.366727	0	0	0	0.633273	0	0	0	0	0	0
0.406692	0	0	0	0.593308	0	0	0	0	0	0
0.260462	0	0	0	0.29063	0.448909	0	0	0	0	0
0.210643	0	0	0	0.462261	0.327096	0	0	0	0	0
0.305977	0	0	0	0.384144	0.309879	0	0	0	0	0
0.341451	0	0	0	0.376674	0.281874	0	0	0	0	0
0.140618	0	0	0	0.526919	0	0	0	0.332463	0	0
0.222167	0	0	0	0.512555	0	0	0	0.265278	0	0
0.211571	0	0	0	0.496352	0	0	0	0.292077	0	0
0	0	0	0	0.52929	0	0	0	0.47071	0	0
0	0	0	0	0.487457	0	0	0	0.512543	0	0
0	0	0	0	0.465113	0	0	0	0.534886	0	0
0	0	0	0	0.466524	0	0	0	0.533476	0	0
0	0	0	0	0.789218	0	0	0	0.210782	0	0
0	0	0	0	0.750088	0	0	0	0.249912	0	0
0	0	0	0	0.587595	0	0	0	0.412405	0	0
0	0	0	0	0.59438	0	0	0	0.40562	0	0
0	0	0	0	0.707484	0	0	0	0.292516	0	0
0	0	0	0	0.634115	0	0	0	0.365885	0	0
0	0	0	0	0.660985	0	0	0	0.339015	0	0
0	0	0	0	0.661586	0	0	0	0.338414	0	0
0	0	0	0	0.702209	0	0	0	0	0	0.297791
0	0	0	0	0.761947	0	0	0.238053	0	0	0
0	0	0	0	1	0	0	0	0	0	0
0	0	0	0	1	0	0	0	0	0	0
0	0	0	0	1	0	0	0	0	0	0
0	0	0	0	1	0	0	0	0	0	0
0	0	0	0	1	0	0	0	0	0	0
0	0	0	0	1	0	0	0	0	0	0
0	0	0	0	1	0	0	0	0	0	0
0	0	0	0	1	0	0	0	0	0	0
0	0	0	0	1	0	0	0	0	0	0
0	0	0	0	1	0	0	0	0	0	0
0	0	0	0	1	0	0	0	0	0	0
0	0	0	0	1	0	0	0	0	0	0
0	0	0	0	1	0	0	0	0	0	0
0	0	0	0	1	0	0	0	0	0	0
0	0	0	0	1	0	0	0	0	0	0
0	0	0	0	1	0	0	0	0	0	0
0	0	0	0	1	0	0	0	0	0	0
0	0	0	0	1	0	0	0	0	0	0
0	0	0	0	1	0	0	0	0	0	0
0	0	0	0	1	0	0	0	0	0	0
0	0	0	0	1	0	0	0	0	0	0
0	0	0	0	1	0	0	0	0	0	0
0	0	0	0	1	0	0	0	0	0	0
0	0	0	0	1	0	0	0	0	0	0
0	0	0	0	1	0	0	0	0	0	0
0	0	0	0	1	0	0	0	0	0	0
0	0	0	0	1	0	0	0	0	0	0
0	0	0	0	1	0	0	0	0	0	0
0	0	0	0	1	0	0	0	0	0	0
0	0	0	0	1	0	0	0	0	0	0
0	0	0	0	1	0	0	0	0	0	0
0	0	0	0	1	0	0	0	0	0	0
0	0	0	0	1	0	0	0	0	0	0
0	0	0	0	1	0	0	0	0	0	0
0	0	0	0	1	0	0	0	0	0	0
0	0	0	0	1	0	0	0	0	0	0
0	0	0	0	1	0	0	0	0	0	0
0	0	0	0	1	0	0	0	0	0	0
0	0	0	0	1	0	0	0	0	0	0
0	0	0	0	1	0	0	0	0	0	0
0	0	0	0	1	0	0	0	0	0	0
0	0	0	0	1	0	0	0	0	0	0
0	0	0	0	1	0	0	0	0	0	0
0	0	0	0	1	0	0	0	0	0	0
0	0	0	0	1	0	0	0	0	0	0
0	0	0	0	1	0	0	0	0	0	0
0	0	0	0	1	0	0	0	0	0	0
0	0	0	0	1	0	0	0	0	0	0
0	0	0	0	1	0	0	0	0	0	0
0	0	0	0	1	0	0	0	0	0	0
0	0	0	0	1	0	0	0	0	0	0
0	0	0	0	1	0	0	0	0	0	0
0	0	0	0	1	0	0	0	0	0	0
0	0	0	0	1	0	0	0	0	0	0
0	0	0	0	1	0	0	0	0	0	0
0	0	0	0	1	0	0	0	0	0	0
0	0	0	0	1	0	0	0	0	0	0
0	0	0	0	1	0	0	0	0	0	0
0	0	0	0	1	0	0	0	0	0	0
0	0	0	0	1	0	0	0	0	0	0
0	0	0	0	1	0	0	0	0	0	0
0	0	0	0	1	0	0	0	0	0	0
0	0	0	0	1	0	0	0	0	0	0
0	0	0	0	1	0	0	0	0	0	0
0	0	0	0	1	0	0	0	0	0	0
0	0	0	0	1	0	0	0	0	0	0
0	0	0	0	1	0	0	0	0	0	0
0	0	0	0	1	0	0	0	0	0	0
0	0	0	0	1	0	0	0	0	0	0
0	0	0	0	1	0	0	0	0	0	0
0	0	0	0	1	0	0	0	0	0	0
0	0	0	0	1	0	0	0	0	0	0
0	0	0	0	1	0	0	0	0	0	0
0	0	0	0	1	0	0	0	0	0	0
0	0	0	0	1	0	0	0	0	0	0
0	0	0	0	1	0	0	0	0	0	0
0	0	0	0	1	0	0	0	0	0	0
0	0	0	0	1	0	0	0	0	0	0
0	0	0	0	1	0	0	0	0	0	0
0	0	0	0	1	0	0	0	0	0	0
0	0	0	0	1	0	0	0	0	0	0
0	0	0	0	1	0	0	0	0	0	0
0	0	0	0	1	0	0	0	0	0	0
0	0	0	0	1	0	0	0	0	0	0
0	0	0	0	1	0	0	0	0	0	0
0	0	0	0	1	0	0	0	0	0	0
0	0	0	0	1	0	0	0	0	0	0
0	0	0	0	1	0	0	0	0	0	0
0	0	0	0	1	0	0	0	0	0	0
0	0	0	0	1	0	0	0	0	0	0
0	0	0	0	1	0	0	0	0	0	0
0	0	0	0	1	0	0	0	0	0	0
0	0	0	0	1	0	0	0	0	0	0
0	0	0	0	1	0	0	0	0	0	0
0	0	0	0	1	0	0	0	0	0	0
0	0	0	0	1	0	0	0	0	0	0
0	0	0	0	1	0	0	0	0	0	0
0	0	0	0	1	0	0	0	0	0	0
0	0	0	0	1	0	0	0	0	0	0
0	0	0	0	1	0	0	0	0	0	0
0	0	0	0	1	0	0	0	0	0	0
0	0	0	0	1	0	0	0	0	0	0
0	0	0	0	1	0	0	0	0	0	0
0	0	0	0	1	0	0	0	0	0	0
0	0	0	0	1	0	0	0	0	0	0
0	0	0	0	1	0	0	0	0	0	0
0	0	0	0	1	0	0	0	0	0	0
0	0	0	0	1	0	0	0	0	0	0
0	0	0	0	1	0	0	0	0	0	0
0	0	0	0	1	0	0	0	0	0	0
0	0	0	0	1	0	0	0	0	0	0
0	0	0	0	1	0	0	0	0	0	0
0	0	0	0	1	0	0	0	0	0	0
0	0	0	0	1	0	0	0	0	0	0
0	0	0	0	1	0	0	0	0	0	0
0	0	0	0	1	0	0	0	0	0	0
0	0	0	0	1	0	0	0	0	0	0
0	0	0	0	1	0	0	0	0	0	0
0	0	0	0	1	0	0	0	0	0	0
0	0	0	0	1	0	0	0	0	0	0
0	0	0	0	1	0	0	0	0	0	0
0	0	0	0	1	0	0	0	0	0	0
0	0	0	0	1	0	0	0	0	0	0
0	0	0	0	1	0	0	0	0	0	0
0	0	0	0	1	0	0	0	0	0	0
0	0	0	0	1	0	0	0	0	0	0
0	0	0	0	1	0	0	0	0	0	0
0	0	0	0	1	0	0	0	0	0	0
0	0	0	0	1	0	0	0	0	0	0
0	0	0	0	1	0	0	0	0	0	0
0	0	0	0	1	0	0	0	0	0	0
0	0	0	0	1	0	0	0	0	0	0
0	0	0	0	1	0	0	0	0	0	0
0	0	0	0	1	0	0	0	0	0	0
0	0	0	0	1	0	0	0	0	0	0
0	0	0	0	1	0	0	0	0	0	0
0	0	0	0	1	0	0	0	0	0	0
0	0	0	0	1	0	0	0	0	0	0
0	0	0	0	1	0	0	0	0	0	0
0	0	0	0	1	0	0	0	0	0	0
0	0	0	0	1	0	0	0	0	0	0
0	0	0	0	1	0	0	0	0	0	0
0	0	0	0	1	0	0	0	0	0	0
0	0	0	0	1	0	0	0	0	0	0
0	0	0	0	1	0	0	0	0	0	0
0	0	0	0	1	0	0	0	0	0	0
0	0	0	0	1	0	0	0	0	0	0
0	0	0	0	1	0	0	0	0	0	0
0	0	0	0	1	0	0	0	0	0	0
0	0	0	0	1	0	0	0	0	0	0
0	0	0	0	1	0	0	0	0	0	0
0	0	0	0	1	0	0	0	0	0	0
0	0	0	0	1	0	0	0	0	0	0
0	0	0	0	1	0	0	0	0	0	0
0	0	0	0	1	0	0	0	0	0	0
0	0	0	0	1	0	0	0	0	0	0
0	0	0	0	1	0	0	0	0	0	0
0	0	0	0	1	0	0	0	0	0	0
0	0	0	0	1	0	0	0	0	0	0
0	0	0	0	1	0	0	0	0	0	0
0	0	0	0	1	0	0	0	0	0	0
0	0	0	0	1	0	0	0	0	0	0
0	0	0	0	1	0	0	0	0	0	0
0	0	0	0	1	0	0	0	0	0	0
0	0	0	0	1	0	0	0	0	0	0
0	0	0	0	1	0	0	0	0	0	0
0	0	0	0	1	0	0	0	0	0	0
0	0	0	0	1	0	0	0	0	0	0
0	0	0	0	1	0	0	0	0	0	0
0	0	0	0	1	0	0	0	0	0	0
0	0	0	0	1	0	0	0	0	0	0
0	0	0	0	1	0	0	0	0	0	0
0	0	0	0	1	0	0	0	0	0	0
0	0	0	0	1	0	0	0	0	0	0
0	0	0	0	1	0	0	0	0	0	0
0	0	0	0	1	0	0	0	0	0	0
0	0	0	0	1	0	0	0	0	0	0
0	0	0	0	1	0	0	0	0	0	0
0	0	0	0	1	0	0	0	0	0	0
0	0	0	0	1	0	0	0	0	0	0
0	0	0	0	1	0	0	0	0	0	0
0	0	0	0	1	0	0	0	0	0	0
0	0	0	0	1	0	0	0	0	0	0
0	0	0	0	1	0	0	0	0	0	0
0	0	0	0	1	0	0	0	0	0	0
0	0	0	0	1	0	0	0	0	0	0
0	0	0	0	1	0	0	0	0	0	0
0	0	0	0	1	0	0	0	0	0	0
0	0	0	0	1	0	0	0	0	0	0
0	0	0	0	1	0	0	0	0	0	0
0	0	0	0	1	0	0	0	0	0	0
0	0	0	0	1	0	0	0	0	0	0
0	0	0	0	1	0	0	0	0	0	0
0	0	0	0	1	0	0	0	0	0	0
0	0	0	0	1	0	0	0	0	0	0
0	0	0	0	1	0	0	0	0	0	0
0	0	0	0	1	0	0	0	0	0	0
0	0	0	0	1	0	0	0	0	0	0
0	0	0	0	1	0	0	0	0	0	0
0	0	0	0	1	0	0	0	0	0	0
0	0	0	0	1	0	0	0	0	0	0
0	0	0	0	1	0	0	0	0	0	0
0	0	0	0	1	0	0	0	0	0	0
0	0	0	0	1	0	0	0	0	0	0
0	0	0	0	1	0	0	0	0	0	0
0	0	0	0	1	0	0	0	0	0	0
0	0	0	0	1	0	0	0	0	0	0
0	0	0	0	1	0	0	0	0	0	0
0	0	0	0	1	0	0	0	0	0	0
0	0	0	0	1	0	0	0	0	0	0
0	0	0	0	1	0	0	0	0	0	0
0	0	0	0	1	0	0	0	0	0	0
0	0	0	0	1	0	0	0	0	0	0
0	0	0	0	1	0	0	0	0	0	0
0	0	0	0	1	0	0	0	0	0	0
0	0	0	0	1	0	0	0	0	0	0
0	0	0	0	1	0	0	0	0	0	0
0	0	0	0	1	0	0	0	0	0	0
0	0	0	0	1	0	0	0	0	0	0
0	0	0	0	1	0	0	0	0	0	0
0	0	0	0	1	0	0	0	0	0	0
0	0	0	0	1	0	0	0	0	0	0
0	0	0	0	1	0	0	0	0	0	0
0	0	0	0	1	0	0	0	0	0	0
0	0	0	0	1	0	0	0	0	0	0
0	0	0	0	1	0	0	0	0	0	0
0	0	0	0	1	0	0	0	0	0	0
0	0	0	0	1	0	0	0	0	0	0
0	0	0	0	1	0	0	0	0	0	0
0	0	0	0	1	0	0	0	0	0	0
0	0	0	0	1	0	0	0	0	0	0
0	0	0	0	1	0	0	0	0	0	0
0	0	0	0	1	0	0	0	0	0	0
0	0	0	0	1	0	0	0	0	0	0
0	0	0	0	1	0	0	0	0	0	0
0	0	0	0	1	0	0	0	0	0	0
0	0	0	0	1	0	0	0	0	0	0
0	0	0	0	1	0	0	0	0	0	0
0	0	0	0	1	0	0	0	0	0	0
0	0	0	0	1	0	0	0	0	0	0
0	0	0	0	1	0	0	0	0	0	0
0	0	0	0	1	0	0	0	0	0	0
0	0	0	0	1	0	0	0	0	0	0
0	0	0	0	1	0	0	0	0	0	0
0	0	0	0	1	0	0	0	0	0	0
0	0	0	0	1	0	0	0	0	0	0
0	0	0	0	1	0	0	0	0	0	0
0	0	0	0	1	0	0	0	0	0	0
0	0	0	0	1	0	0	0	0	0	0
0	0	0	0	1	0	0	0	0	0	0
0	0	0	0	1	0	0	0	0	0	0
0	0	0	0	1	0	0	0	0	0	0
0	0	0	0	1	0	0	0	0	0	0
0	0	0	0	1	0	0	0	0	0	0
0	0	0	0	1	0	0	0	0	0	0
0	0	0	0	1	0	0	0	0	0	0
0	0	0	0	1	0	0	0	0	0	0
0	0	0	0	1	0	0	0	0	0	0
0	0	0	0	1	0	0	0	0	0	0
0	0	0	0	1	0	0	0	0	0	0
0	0	0	0	1	0	0	0	0	0	0
0	0	0	0	1	0	0	0	0	0	0
0	0	0	0	1	0	0	0	0	0	0
0	0	0	0	1	0	0	0	0	0	0
0	0	0	0	1	0	0	0	0	0	0
0	0	0	0	1	0	0	0	0	0	0
0	0	0	0	1	0	0	0	0	0	0
0	0	0	0	1	0	0	0	0	0	0
0	0	0	0	1	0	0	0	0	0	0
0	0	0	0	1	0	0	0	0	0	0
0	0	0	0	1	0	0	0	0	0	0
0	0	0	0	1	0	0	0	0	0	0
0	0	0	0	1	0	0	0	0	0	0
0	0	0	0	1	0	0	0	0	0	0
0	0	0	0	1	0	0	0	0	0	0
0	0	0	0	1	0	0	0	0	0	0
0	0	0	0	1	0	0	0	0	0	0
0	0	0	0	1	0	0	0	0	0	0
0	0	0	0	1	0	0	0	0	0	0
0	0	0	0	1	0	0	0	0	0	0
0	0	0	0	1	0	0	0	0	0	0
0	0	0	0	1	0	0	0	0	0	0
0	0	0	0	1	0	0	0	0	0	0
0	0	0	0	1	0	0	0	0	0	0
0	0	0	0	1	0	0	0	0	0	0
0	0	0	0	1	0	0	0	0	0	0
0	0	0	0	1	0	0	0	0	0	0
0	0	0	0	1	0	0	0	0	0	0
0	0	0	0	1	0	0	0	0	0	0
0	0	0	0	1	0	0	0	0	0	0
0	0	0	0	1	0	0	0	0	0	0
0	0	0	0	1	0	0	0	0	0	0
0	0	0	0	1	0	0	0	0	0	0
0	0	0	0	1	0	0	0	0	0	0
0	0	0	0	1	0	0	0	0	0	0
0	0	0	0	1	0	0	0	0	0	0
0	0	0	0	1	0	0	0	0	0	0
0	0	0	0	1	0	0	0	0	0	0
0	0	0	0	1	0	0	0	0	0	0
0	0	0	0	1	0	0	0	0	0	0
0	0	0	0	1	0	0	0	0	0	0
0	0	0	0	1	0	0	0	0	0	0
0	0	0	0	1	0	0	0	0	0	0
0	0	0	0	1	0	0	0	0	0	0
0	0	0	0	1	0	0	0	0	0	0
0	0	0	0	1	0	0	0	0	0	0
0	0	0	0	1	0	0	0	0	0	0
0	0	0	0	1	0	0	0	0	0	0
0	0	0	0	1	0	0	0	0	0	0
0	0	0	0	1	0	0	0	0	0	0
0	0	0	0	1	0	0	0	0	0	0
0	0	0	0	1	0	0	0	0	0	0
0	0	0	0	1	0	0	0	0	0	0
0	0	0	0	1	0	0	0	0	0	0
0	0	0	0	1	0	0	0	0	0	0
0	0	0	0	1	0	0	0	0	0	0
0	0	0	0	1	0	0	0	0	0	0
0	0	0	0	1	0	0	0	0	0	0
0	0	0	0	1	0	0	0	0	0	0
0	0	0	0	1	0	0	0	0	0	0
0	0	0	0	1	0	0	0	0	0	0
0	0	0	0	1	0	0	0	0	0	0
0	0	0	0	1	0	0	0	0	0	0
0	0	0	0	1	0	0	0	0	0	0
0	0	0	0	1	0	0	0	0	0	0
0	0	0	0	1	0	0	0	0	0	0
0	0	0	0	1	0	0	0	0	0	0
0	0	0	0	1	0	0	0	0	0	0
0	0	0	0	1	0	0	0	0	0	0
0	0	0	0	1	0	0	0	0	0	0
0	0	0	0	1	0	0	0	0	0	0
0	0	0	0	1	0	0	0	0	0	0
0	0	0	0	1	0	0	0	0	0	0
0	0	0	0	1	0	0	0	0	0	0
0	0	0	0	1	0	0	0	0	0	0
0	0	0	0	1	0	0	0	0	0	0
0	0	0	0	1	0	0	0	0	0	0
0	0	0	0	1	0	0	0	0	0	0
0	0	0	0	1	0	0	0	0	0	0
0	0	0	0	1	0	0	0	0	0	0
0	0	0	0	1	0	0	0	0	0	0
0	0	0	0	1	0	0	0	0	0	0
0	0	0	0	1	0	0	0	0	0	0
0	0	0	0	1	0	0	0	0	0	0
0	0	0	0	1	0	0	0	0	0	0
0	0	0	0	1	0	0	0	0	0	0
0	0	0	0	1	0	0	0	0	0	0
0	0	0	0	1	0	0	0	0	0	0
0	0	0	0	1	0	0	0	0	0	0
0	0	0	0	1	0	0	0	0	0	0
0	0	0	0	1	0	0	0	0	0	0
0	0	0	0	1	0	0	0	0	0	0
0	0	0	0	1	0	0	0	0	0	0
0	0	0	0	1	0	0	0	0	0	0
0	0	0	0	1	0	0	0	0	0	0
0	0	0	0	1	0	0	0	0	0	0
0	0	0	0	1	0	0	0	0	0	0
0	0	0	0	1	0	0	0	0	0	0
0	0	0	0	1	0	0	0	0	0	0
0	0	0	0	1	0	0	0	0	0	0
0	0	0	0	1	0	0	0	0	0	0
0	0	0	0	1	0	0	0	0	0	0
0	0	0	0	1	0	0	0	0	0	0
0	0	0	0	1	0	0	0	0	0	0
0	0	0	0	1	0	0	0	0	0	0
0	0	0	0	1	0	0	0	0	0	0
0	0	0	0	1	0	0	0	0	0	0
0	0	0	0	1	0	0	0	0	0	0
0	0	0	0	1	0	0	0	0	0	0
0	0	0	0	1	0	0	0	0	0	0
0	0	0	0	1	0	0	0	0	0	0
0	0	0	0	1	0	0	0	0	0	0
0	0	0	0	1	0	0	0	0	0	0
0	0	0	0	1	0	0	0	0	0	0
0	0	0	0	1	0	0	0	0	0	0
0	0	0	0	1	0	0	0	0	0	0
0	0	0	0	1	0	0	0	0	0	0
0	0	0	0	1	0	0	0	0	0	0
0	0	0	0	1	0	0	0	0	0	0
0	0	0	0	1	0	0	0	0	0	0
0	0	0	0	1	0	0	0	0	0	0
0	0	0	0	1	0	0	0	0	0	0
0	0	0	0	1	0	0	0	0	0	0
0	0	0	0	1	0	0	0	0	0	0
0	0	0	0	1	0	0	0	0	0	0
0	0	0	0	1	0	0	0	0	0	0
0	0	0	0	1	0	0	0	0	0	0
0	0	0	0	1	0	0	0	0	0	0
0	0	0	0	1	0	0	0	0	0	0
0	0	0	0	1	0	0	0	0	0	0
0	0	0	0	1	0	0	0	0	0	0
0	0	0	0	1	0	0	0	0	0	0
0	0	0	0	1	0	0	0	0	0	0
0	0	0	0	1	0	0	0	0	0	0
0	0	0	0	1	0	0	0	0	0	0
0	0	0	0	1	0	0	0	0	0	0
0	0	0	0	1	0	0	0	0	0	0
0	0	0	0	1	0	0	0	0	0	0
0	0	0	0	1	0	0	0	0	0	0
0	0	0	0	1	0	0	0	0	0	0
0	0	0	0	1	0	0	0	0	0	0
0	0	0	0	1	0	0	0	0	0	0
0	0	0	0	1	0	0	0	0	0	0
0	0	0	0	1	0	0	0	0	0	0
0	0	0	0	1	0	0	0	0	0	0
0	0	0	0	1	0	0	0	0	0	0
0	0	0	0	1	0	0	0	0	0	0
0	0	0	0	1	0	0	0	0	0	0
0	0	0	0	1	0	0	0	0	0	0
0	0	0	0	1	0	0	0	0	0	0
0	0	0	0	1	0	0	0	0	0	0
0	0	0	0	1	0	0	0	0	0	0
0	0	0	0	1	0	0	0	0	0	0
0	0	0	0	1	0	0	0	0	0	0
0	0	0	0	1	0	0	0	0	0	0
0	0	0	0	1	0	0	0	0	0	0
0	0	0	0	1	0	0	0	0	0	0
0	0	0	0	1	0	0	0	0	0	0
0	0	0	0	1	0	0	0	0	0	0
0	0	0	0	1	0	0	0	0	0	0
0	0	0	0	1	0	0	0	0	0	0
0	0	0	0	1	0	0	0	0	0	0
0	0	0	0	1	0	0	0	0	0	0
0	0	0	0	1	0	0	0	0	0	0
0	0	0	0	1	0	0	0	0	0	0
0	0	0	0	1	0	0	0	0	0	0
0	0	0	0	1	0	0	0	0	0	0
0	0	0	0	1	0	0	0	0	0	0
0	0	0	0	1	0	0	0	0	0	0
0	0	0	0	1	0	0	0	0	0	0
0	0	0	0	1	0	0	0	0	0	0
0	0	0	0	1	0	0	0	0	0	0
0	0	0	0	1	0	0	0	0	0	0
0	0	0	0	1	0	0	0	0	0	0
0	0	0	0	1	0	0	0	0	0	0
0	0	0	0	1	0	0	0	0	0	0
0	0	0	0	1	0	0	0	0	0	0
0	0	0	0	1	0	0	0	0	0	0
0	0	0	0	1	0	0	0	0	0	0
0	0	0	0	1	0	0	0	0	0	0
0	0	0	0	1	0	0	0	0	0	0
0	0	0	0	1	0	0	0	0	0	0
0	0	0	0	1	0	0	0	0	0	0
0	0	0	0	1	0	0	0	0	0	0
0	0	0	0	1	0	0	0	0	0	0
0.217579	0	0	0	0.782421	0	0	0	0	0	0
0.138028	0	0	0	0.861972	0	0	0	0	0	0
0.134054	0	0	0	0.865946	0	0	0	0	0	0
0.0938762	0	0	0	0.906124	0	0	0	0	0	0
0.094862	0	0	0	0.905138	0	0	0	0	0	0
0.11046	0	0	0	0.88954	0	0	0	0	0	0
0.11914	0	0	0	0.88086	0	0	0	0	0	0
0	0	0	0	0.260835	0	0.565735	0	0	0	0.173431
0	0	0	0	0.258463	0	0.530307	0	0	0	0.21123
0	0	0	0	0.275538	0	0.513892	0	0	0	0.210569
0	0	0	0	0.270739	0	0.729261	0	0	0	0
0	0	0	0	0.306897	0	0.693103	0	0	0	0
0	0	0	0	0.367842	0	0.632158	0	0	0	0
0	0	0	0	0.365421	0	0.634579	0	0	0	0
0	0	0	0	0.375988	0	0.624012	0	0	0	0
0	0	0	0	0.373294	0	0.626706	0	0	0	0
0	0	0	0	0.335059	0	0.664941	0	0	0	0
0	0	0	0	0.349347	0	0.650653	0	0	0	0
0	0	0	0	0.34687	0	0.65313	0	0	0	0
0	0	0	0	0.344204	0	0.655796	0	0	0	0
0	0	0	0	0.340833	0	0.659167	0	0	0	0
0	0	0	0	0.446622	0	0.553378	0	0	0	0
0	0	0	0	0.445911	0	0.554089	0	0	0	0
0	0	0	0	0.414782	0	0.585218	0	0	0	0
0	0	0	0	0.412596	0	0.587404	0	0	0	0
0	0	0	0	0.404632	0	0.595368	0	0	0	0
0	0	0	0	0.405935	0	0.594065	0	0	0	0
0	0	0	0	0.4067	0	0.5933	0	0	0	0
0	0	0	0	0.3985	0	0.6015	0	0	0	0
0	0	0	0	0.401799	0	0.598201	0	0	0	0
0	0	0	0	0.277444	0	0.437182	0	0.285374	0	0
0	0	0	0	0.282102	0	0.35984	0	0.358059	0	0
0	0	0	0	0.344242	0	0.358591	0	0.297167	0	0
0	0	0	0	0.336772	0	0.376482	0	0.286746	0	0
0	0	0	0	0.40224	0	0.381869	0	0.215891	0	0
0	0	0	0	0.429313	0	0.341075	0	0.229612	0	0
0	0	0	0	0.445041	0	0.360658	0	0.194302	0	0
0	0	0	0	0.425981	0	0.366232	0	0.207787	0	0
0	0	0	0	0.456772	0	0.288755	0	0.254473	0	0
0	0	0	0	0.522796	0	0.291626	0	0.185578	0	0
0	0	0	0	0.537675	0	0.266828	0	0.195497	0	0
0	0	0	0	0.492644	0	0.302141	0	0.205215	0	0
0	0	0	0	0.48511	0	0.336091	0	0.178799	0	0
0	0	0	0	0.499713	0	0.322676	0	0.177611	0	0
0	0	0	0	0.503607	0	0.312271	0	0.184122	0	0
0	0	0	0	0.495421	0	0.321698	0	0	0	0.18288
0	0	0	0	0.697654	0	0.302346	0	0	0	0
0	0	0	0	0.697766	0	0.302234	0	0	0	0
0	0	0	0	0.700018	0	0.299982	0	0	0	0
0	0	0	0	0.699732	0	0.300268	0	0	0	0
0	0	0	0	0.698487	0	0.301513	0	0	0	0
0	0	0	0	0.699268	0	0.300732	0	0	0	0
0	0	0	0	0.698903	0	0.301097	0	0	0	0
0	0	0	0	0.705178	0	0.294822	0	0	0	0
0	0	0	0	0.704526	0	0.295474	0	0	0	0
0	0	0	0	0.704894	0	0.295106	0	0	0	0
0	0	0	0	0.704804	0	0.295196	0	0	0	0
0	0	0	0	0.70297	0	0.29703	0	0	0	0
0	0	0	0	0.702773	0	0.297227	0	0	0	0
0	0	0	0	0.701954	0	0.298046	0	0	0	0
0	0	0	0	0.701654	0	0.298346	0	0	0	0
0	0	0	0	0.701406	0	0.298594	0	0	0	0
0	0	0	0	0.701502	0	0.298498	0	0	0	0
0	0	0	0	0.707975	0	0.292025	0	0	0	0
0	0	0	0	0.708117	0	0.291883	0	0	0	0
0	0	0	0	0.708176	0	0.291824	0	0	0	0
0	0	0	0	0.708574	0	0.291426	0	0	0	0
0	0	0	0	0.708457	0	0.291543	0	0	0	0
0	0	0	0	0.708395	0	0.291605	0	0	0	0
0	0	0	0	0.708374	0	0.291626	0	0	0	0
0	0	0	0	0.708367	0	0.291633	0	0	0	0
0	0	0	0	0.707125	0	0.292875	0	0	0	0
0	0	0	0	0.706558	0	0.293442	0	0	0	0
0	0	0	0	0.714343	0	0.285657	0	0	0	0
0	0	0	0	0.715411	0	0.284589	0	0	0	0
0	0	0	0	0.715488	0	0.284512	0	0	0	0
0	0	0	0	0.715457	0	0.284543	0	0	0	0
0	0	0	0	0.711537	0	0.288463	0	0	0	0
0	0	0	0	0.711894	0	0.288106	0	0	0	0
0	0	0	0	0.71218	0	0.28782	0	0	0	0
0	0	0	0	0.71209	0	0.28791	0	0	0	0
0	0	0	0	0.712077	0	0.287923	0	0	0	0
0	0	0	0	0.713216	0	0.286784	0	0	0	0
0	0	0	0	0.712761	0	0.287239	0	0	0	0
0	0	0	0	0.712758	0	0.287242	0	0	0	0
0	0	0	0	0.712419	0	0.287581	0	0	0	0
0	0	0	0	0.712553	0	0.287447	0	0	0	0
0	0	0	0	0.709516	0	0.290484	0	0	0	0
0	0	0	0	0.710865	0	0.289135	0	0	0	0
0	0	0	0	0.710546	0	0.289454	0	0	0	0
0	0	0	0	0.740854	0	0.259146	0	0	0	0
0	0	0	0	0.722146	0	0.277854	0	0	0	0
0	0	0	0	0.7223	0	0.2777	0	0	0	0
0	0	0	0	0.722348	0	0.277652	0	0	0	0
0	0	0	0	0.723204	0	0.276796	0	0	0	0
0	0	0	0	0.723815	0	0.276185	0	0	0	0
0	0	0	0	0.723833	0	0.276167	0	0	0	0
0	0	0	0	0.724379	0	0.275621	0	0	0	0
0	0	0	0	0.724308	0	0.275692	0	0	0	0
0	0	0	0	0.720959	0	0.279041	0	0	0	0
0	0	0	0	0.720829	0	0.279171	0	0	0	0
0	0	0	0	0.720741	0	0.279259	0	0	0	0
0	0	0	0	0.720081	0	0.279919	0	0	0	0
0	0	0	0	0.719598	0	0.280402	0	0	0	0
0	0	0	0	0.719576	0	0.280424	0	0	0	0
0	0	0	0	0.716653	0	0.283347	0	0	0	0
0	0	0	0	0.717096	0	0.282904	0	0	0	0
0	0	0	0	0.718265	0	0.281735	0	0	0	0
0	0	0	0	0.717983	0	0.282017	0	0	0	0
0	0	0	0	0.719108	0	0.280892	0	0	0	0
0	0	0	0	0.718774	0	0.281226	0	0	0	0
0	0	0	0	0.718612	0	0.281388	0	0	0	0
0	0	0	0	0.72521	0	0.27479	0	0	0	0
0	0	0	0	0.726029	0	0.273971	0	0	0	0
0	0	0	0	0.726201	0	0.273799	0	0	0	0
0	0	0	0	0.726348	0	0.273652	0	0	0	0
0	0	0	0	0.729575	0	0.270425	0	0	0	0
0	0	0	0	0.729242	0	0.270758	0	0	0	0
0	0	0	0	0.728955	0	0.271045	0	0	0	0
0	0	0	0	0.727533	0	0.272467	0	0	0	0
0	0	0	0	0.728077	0	0.271923	0	0	0	0
0	0	0	0	0.728306	0	0.271693	0	0	0	0
0	0	0	0	0.7283	0	0.2717	0	0	0	0
0	0	0	0	0.730967	0	0.269033	0	0	0	0
0	0	0	0	0.731992	0	0.268008	0	0	0	0
0	0	0	0	0.73216	0	0.26784	0	0	0	0
0	0	0	0	0.736131	0	0.263869	0	0	0	0
0	0	0	0	0.735719	0	0.264281	0	0	0	0
0	0	0	0	0.733314	0	0.266686	0	0	0	0
0	0	0	0	0.734367	0	0.265633	0	0	0	0
0	0	0	0	0.694161	0	0.305839	0	0	0	0
0	0	0	0	0.69475	0	0.30525	0	0	0	0
0	0	0	0	0.69154	0	0.30846	0	0	0	0
0	0	0	0	0.690706	0	0.309294	0	0	0	0
0	0	0	0	0.689958	0	0.310042	0	0	0	0
0	0	0	0	0.688525	0	0.311475	0	0	0	0
0	0	0	0	0.689011	0	0.310989	0	0	0	0
0	0	0	0	0.687188	0	0.312812	0	0	0	0
0	0	0	0	0.686968	0	0.313032	0	0	0	0
0	0	0	0	0.687817	0	0.312183	0	0	0	0
0	0	0	0	0.68748	0	0.31252	0	0	0	0
0	0	0	0	0.672562	0	0.327438	0	0	0	0
0	0	0	0	0.671513	0	0.328487	0	0	0	0
0	0	0	0	0.674092	0	0.325908	0	0	0	0
0	0	0	0	0.675095	0	0.324905	0	0	0	0
0	0	0	0	0.676087	0	0.323913	0	0	0	0
0	0	0	0	0.675784	0	0.324216	0	0	0	0
0	0	0	0	0.681872	0	0.318128	0	0	0	0
0	0	0	0	0.681642	0	0.318358	0	0	0	0
0	0	0	0	0.681671	0	0.318329	0	0	0	0
0	0	0	0	0.682254	0	0.317746	0	0	0	0
0	0	0	0	0.682638	0	0.317362	0	0	0	0
0	0	0	0	0.683175	0	0.316825	0	0	0	0
0	0	0	0	0.683177	0	0.316823	0	0	0	0
0	0	0	0	0.684039	0	0.315961	0	0	0	0
0	0	0	0	0.684248	0	0.315752	0	0	0	0
0	0	0	0	0.680882	0	0.319118	0	0	0	0
0	0	0	0	0.68002	0	0.31998	0	0	0	0
0	0	0	0	0.67997	0	0.32003	0	0	0	0
0	0	0	0	0.678809	0	0.321191	0	0	0	0
0	0	0	0	0.67765	0	0.32235	0	0	0	0
0	0	0	0	0.669433	0	0.330567	0	0	0	0
0	0	0	0	0.669283	0	0.330717	0	0	0	0
0	0	0	0	0.666744	0	0.333256	0	0	0	0
0	0	0	0	0.667872	0	0.332128	0	0	0	0
0	0	0	0	0.664348	0	0.335652	0	0	0	0
0	0	0	0	0.663489	0	0.336511	0	0	0	0
0	0	0	0	0.660931	0	0.339069	0	0	0	0
0	0	0	0	0.661968	0	0.338032	0	0	0	0
0	0	0	0	0.662006	0	0.337994	0	0	0	0
0	0	0	0	0.642546	0	0.357454	0	0	0	0
0	0	0	0	0.640948	0	0.359052	0	0	0	0
0	0	0	0	0.641153	0	0.358847	0	0	0	0
0	0	0	0	0.646263	0	0.353737	0	0	0	0
0	0	0	0	0.643853	0	0.356147	0	0	0	0
0	0	0	0	0.644248	0	0.355752	0	0	0	0
0	0	0	0	0.65065	0	0.34935	0	0	0	0
0	0	0	0	0.650858	0	0.349142	0	0	0	0
0	0	0	0	0.649461	0	0.350539	0	0	0	0
0	0	0	0	0.64855	0	0.35145	0	0	0	0
0	0	0	0	0.658508	0	0.341492	0	0	0	0
0	0	0	0	0.653503	0	0.346497	0	0	0	0
0	0	0	0	0.655348	0	0.344652	0	0	0	0
0	0	0	0	0.654602	0	0.345398	0	0	0	0
0	0	0	0	0.625311	0	0.374689	0	0	0	0
0	0	0	0	0.629556	0	0.370444	0	0	0	0
0	0	0	0	0.629039	0	0.370961	0	0	0	0
0	0	0	0	0.626898	0	0.373102	0	0	0	0
0	0	0	0	0.627958	0	0.372042	0	0	0	0
0	0	0	0	0.618088	0	0.381912	0	0	0	0
0	0	0	0	0.622622	0	0.377378	0	0	0	0
0	0	0	0	0.620987	0	0.379013	0	0	0	0
0	0	0	0	0.593087	0	0.406913	0	0	0	0
0	0	0	0	0.592642	0	0.407358	0	0	0	0
0	0	0	0	0.611141	0	0.388859	0	0	0	0
0	0	0	0	0.608335	0	0.391665	0	0	0	0
0	0	0	0	0.603251	0	0.396749	0	0	0	0
0	0	0	0	0.604937	0	0.395063	0	0	0	0
0	0	0	0	0.598036	0	0.401964	0	0	0	0
0	0	0	0	0.599879	0	0.400121	0	0	0	0
0	0	0	0	0.476514	0	0.523486	0	0	0	0
0	0	0	0	0.510873	0	0.489127	0	0	0	0
0	0	0	0	0.493788	0	0.506212	0	0	0	0
0	0	0	0	0.497567	0	0.502433	0	0	0	0
0	0	0	0	0.527137	0	0.472863	0	0	0	0
0	0	0	0	0.531207	0	0.468793	0	0	0	0
0	0	0	0	0.538388	0	0.461612	0	0	0	0
0	0	0	0	0.544552	0	0.455448	0	0	0	0
0	0	0	0	0.551569	0	0.448431	0	0	0	0
0	0	0	0	0.555965	0	0.444035	0	0	0	0
0	0	0	0	0.557254	0	0.442746	0	0	0	0
0	0	0	0	0.569941	0	0.430059	0	0	0	0
0	0	0	0	0.576912	0	0.423088	0	0	0	0
0	0	0	0	0.576358	0	0.423642	0	0	0	0
0	0	0	0	0	0	0	1	0	0	0
0	0	0	0	0	0	0	1	0	0	0
0	0	0	0	0	0	0	1	0	0	0
0	0	0	0	0	0	0	1	0	0	0
0	0	0	0	0	0	0	1	0	0	0
0	0	0	0	0	0	0	1	0	0	0
0	0	0	0	0	0	0	1	0	0	0
0	0	0	0	0	0	0	1	0	0	0
0	0	0	0	0	0	0	1	0	0	0
0	0	0	0	0	0	0	1	0	0	0
0	0	0	0	0	0	0	1	0	0	0
0	0	0	0	0	0	0	1	0	0	0
0	0	0	0	0	0	0	1	0	0	0
0	0	0	0	0	0	0	1	0	0	0
0	0	0	0	0	0	0	1	0	0	0
0	0	0	0	0	0	0	1	0	0	0
0	0	0	0	0	0	0	1	0	0	0
0	0	0	0	0	0	0	1	0	0	0
0	0	0	0	0	0	0	1	0	0	0
0	0	0	0	0	0	0	1	0	0	0
0	0	0	0	0	0	0	1	0	0	0
0	0	0	0	0	0	0	1	0	0	0
0	0	0	0	0	0	0	1	0	0	0
0	0	0	0	0	0	0	1	0	0	0
0	0	0	0	0	0	0	1	0	0	0
0	0	0	0	0	0	0	1	0	0	0
0	0	0	0	0	0	0	1	0	0	0
0	0	0	0	0	0	0	1	0	0	0
0	0	0	0	0	0	0	1	0	0	0
0	0	0	0	0	0	0	1	0	0	0
0	0	0	0	0	0	0	1	0	0	0
0	0	0	0	0	0	0	1	0	0	0
0	0	0	0	0	0	0	1	0	0	0
0	0	0	0	0	0	0	1	0	0	0
0	0	0	0	0	0	0	1	0	0	0
0	0	0	0	0	0	0	1	0	0	0
0	0	0	0	0	0	0	1	0	0	0
0	0	0	0	0	0	0	1	0	0	0
0	0	0	0	0	0	0	1	0	0	0
0	0	0	0	0	0	0	1	0	0	0
0	0	0	0	0	0	0	1	0	0	0
0	0	0	0	0	0	0	1	0	0	0
0	0	0	0	0	0	0	1	0	0	0
0	0	0	0	0	0	0	1	0	0	0
0	0	0	0	0	0	0	1	0	0	0
0	0	0	0	0	0	0	1	0	0	0
0	0	0	0	0	0	0	1	0	0	0
0	0	0	0	0	0	0	1	0	0	0
0	0	0	0	0	0	0	1	0	0	0
0	0	0	0	0	0	0	1	0	0	0
0	0	0	0	0	0	0	1	0	0	0
0	0	0	0	0	0	0	1	0	0	0
0	0	0	0	0	0	0	1	0	0	0
0	0	0	0	0	0	0	1	0	0	0
0	0	0	0	0	0	0	1	0	0	0
0	0	0	0	0	0	0	1	0	0	0
0	0	0	0	0	0	0	1	0	0	0
0	0	0	0	0	0	0	1	0	0	0
0	0	0	0	0	0	0	1	0	0	0
0	0	0	0	0	0	0	1	0	0	0
0	0	0	0	0	0	0	1	0	0	0
0	0	0	0	0	0	0	1	0	0	0
0	0	0	0	0	0	0	1	0	0	0
0	0	0	0	0	0	0	1	0	0	0
0	0	0	0	0	0	0	1	0	0	0
0	0	0	0	0	0	0	1	0	0	0
0	0	0	0	0	0	0	1	0	0	0
0	0	0	0	0	0	0	1	0	0	0
0	0	0	0	0	0	0	1	0	0	0
0	0	0	0	0	0	0	1	0	0	0
0	0	0	0	0	0	0	1	0	0	0
0	0	0	0	0	0	0	1	0	0	0
0	0	0	0	0	0	0	1	0	0	0
0	0	0	0	0	0	0	1	0	0	0
0	0	0	0	0	0	0	1	0	0	0
0	0	0	0	0	0	0	1	0	0	0
0	0	0	0	0	0	0	1	0	0	0
0	0	0	0	0	0	0	1	0	0	0
0	0	0	0	0	0	0	1	0	0	0
0	0	0	0	0	0	0	1	0	0	0
0	0	0	0	0	0	0	1	0	0	0
0	0	0	0	0	0	0	1	0	0	0
0	0	0	0	0	0	0	1	0	0	0
0	0	0	0	0	0	0	1	0	0	0
0	0	0	0	0	0	0	1	0	0	0
0	0	0	0	0	0	0	1	0	0	0
0	0	0	0	0	0	0	1	0	0	0
0	0	0	0	0	0	0	1	0	0	0
0	0	0	0	0	0	0	1	0	0	0
0	0	0	0	0	0	0	1	0	0	0
0	0	0	0	0	0	0	1	0	0	0
0	0	0	0	0	0	0	1	0	0	0
0	0	0	0	0	0	0	1	0	0	0
0	0	0	0	0	0	0	1	0	0	0
0	0	0	0	0	0	0	1	0	0	0
0	0	0	0	0	0	0	1	0	0	0
0	0	0	0	0	0	0	1	0	0	0
0	0	0	0	0	0	0	1	0	0	0
0	0	0	0	0	0	0	1	0	0	0
0	0	0	0	0	0	0	1	0	0	0
0	0	0	0	0	0	0	1	0	0	0
0	0	0	0	0	0	0	1	0	0	0
0	0	0	0	0	0	0	1	0	0	0
0	0	0	0	0	0	0	1	0	0	0
0	0	0	0	0	0	0	1	0	0	0
0	0	0	0	0	0	0	1	0	0	0
0	0	0	0	0	0	0	1	0	0	0
0	0	0	0	0	0	0	1	0	0	0
0	0	0	0	0	0	0	1	0	0	0
0	0	0	0	0	0	0	1	0	0	0
0	0	0	0	0	0	0	1	0	0	0
0	0	0	0	0	0	0	1	0	0	0
0	0	0	0	0	0	0	1	0	0	0
0	0	0	0	0	0	0	1	0	0	0
0	0	0	0	0	0	0	1	0	0	0
0	0	0	0	0	0	0	1	0	0	0
0	0	0	0	0	0	0	1	0	0	0
0	0	0	0	0	0	0	1	0	0	0
0	0	0	0	0	0	0	1	0	0	0
0	0	0	0	0	0	0	1	0	0	0
0	0	0	0	0	0	0	1	0	0	0
0	0	0	0	0	0	0	1	0	0	0
0	0	0	0	0	0	0	1	0	0	0
0	0	0	0	0	0	0	1	0	0	0
0	0	0	0	0	0	0	1	0	0	0
0	0	0	0	0	0	0	1	0	0	0
0	0	0	0	0	0	0	1	0	0	0
0	0	0	0	0	0	0	1	0	0	0
0	0	0	0	0	0	0	1	0	0	0
0	0	0	0	0	0	0	1	0	0	0
0	0	0	0	0	0	0	1	0	0	0
0	0	0	0	0	0	0	1	0	0	0
0	0	0	0	0	0	0	1	0	0	0
0	0	0	0	0	0	0	1	0	0	0
0	0	0	0	0	0	0	1	0	0	0
0	0	0	0	0	0	0	1	0	0	0
0	0	0	0	0	0	0	1	0	0	0
0	0	0	0	0	0	0	1	0	0	0
0	0	0	0	0	0	0	1	0	0	0
0	0	0	0	0	0	0	1	0	0	0
0	0	0	0	0	0	0	1	0	0	0
0	0	0	0	0	0	0	1	0	0	0
0	0	0	0	0	0	0	1	0	0	0
0	0	0	0	0	0	0	1	0	0	0
0	0	0	0	0	0	0	1	0	0	0
0	0	0	0	0	0	0	1	0	0	0
0	0	0	0	0	0	0	1	0	0	0
0	0	0	0	0	0	0	1	0	0	0
0	0	0	0	0	0	0	1	0	0	0
0	0	0	0	0	0	0	1	0	0	0
0	0	0	0	0	0	0	1	0	0	0
0	0	0	0	0	0	0	1	0	0	0
0	0	0	0	0	0	0	1	0	0	0
0	0	0	0	0	0	0	1	0	0	0
0	0	0	0	0	0	0	1	0	0	0
0	0	0	0	0	0	0	1	0	0	0
0	0	0	0	0	0	0	1	0	0	0
0	0	0	0	0	0	0	1	0	0	0
0	0	0	0	0	0	0	1	0	0	0
0	0	0	0	0	0	0	1	0	0	0
0	0	0	0	0	0	0	1	0	0	0
0	0	0	0	0	0	0	1	0	0	0
0	0	0	0	0	0	0	1	0	0	0
0	0	0	0	0	0	0	1	0	0	0
0	0	0	0	0	0	0	1	0	0	0
0	0	0	0	0	0	0	1	0	0	0
0	0	0	0	0	0	0	1	0	0	0
0	0	0	0	0	0	0	1	0	0	0
0	0	0	0	0	0	0	1	0	0	0
0	0	0	0	0	0	0	1	0	0	0
0	0	0	0	0	0	0	1	0	0	0
0	0	0	0	0	0	0	1	0	0	0
0	0	0	0	0	0	0	1	0	0	0
0	0	0	0	0	0	0	1	0	0	0
0	0	0	0	0	0	0	1	0	0	0
0	0	0	0	0	0	0	1	0	0	0
0	0	0	0	0	0	0	1	0	0	0
0	0	0	0	0	0	0	1	0	0	0
0	0	0	0	0	0	0	1	0	0	0
0	0	0	0	0	0	0	1	0	0	0
0	0	0	0	0	0	0	1	0	0	0
0	0	0	0	0	0	0	1	0	0	0
0	0	0	0	0	0	0	1	0	0	0
0	0	0	0	0	0	0	1	0	0	0
0	0	0	0	0	0	0	1	0	0	0
0	0	0	0	0	0	0	1	0	0	0
0	0	0	0	0	0	0	1	0	0	0
0	0	0	0	0	0	0	1	0	0	0
0	0	0	0	0	0	0	1	0	0	0
0	0	0	0	0	0	0	1	0	0	0
0	0	0	0	0	0	0	1	0	0	0
0	0	0	0	0	0	0	1	0	0	0
0	0	0	0	0	0	0	1	0	0	0
0	0	0	0	0	0	0	1	0	0	0
0	0	0	0	0	0	0	1	0	0	0
0	0	0	0	0	0	0	1	0	0	0
0	0	0	0	0	0	0	1	0	0	0
0	0	0	0	0	0	0	1	0	0	0
0	0	0	0	0	0	0	1	0	0	0
0	0	0	0	0	0	0	1	0	0	0
0	0	0	0	0	0	0	1	0	0	0
0	0	0	0	0	0	0	1	0	0	0
0	0	0	0	0	0	0	1	0	0	0
0	0	0	0	0	0	0	1	0	0	0
0	0	0	0	0	0	0	1	0	0	0
0	0	0	0	0	0	0	1	0	0	0
0	0	0	0	0	0	0	1	0	0	0
0	0	0	0	0	0	0	1	0	0	0
0	0	0	0	0	0	0	1	0	0	0
0	0	0	0	0	0	0	1	0	0	0
0	0	0	0	0	0	0	1	0	0	0
0	0	0	0	0	0	0	1	0	0	0
0	0	0	0	0	0	0	1	0	0	0
0	0	0	0	0	0	0	1	0	0	0
0	0	0	0	0	0	0	1	0	0	0
0	0	0	0	0	0	0	1	0	0	0
0	0	0	0	0	0	0	1	0	0	0
0	0	0	0	0	0	0	1	0	0	0
0	0	0	0	0	0	0	1	0	0	0
0	0	0	0	0	0	0	1	0	0	0
0	0	0	0	0	0	0	1	0	0	0
0	0	0	0	0	0	0	1	0	0	0
0	0	0	0	0	0	0	1	0	0	0
0	0	0	0	0	0	0	1	0	0	0
0	0	0	0	0	0	0	1	0	0	0
0	0	0	0	0	0	0	1	0	0	0
0	0	0	0	0	0	0	1	0	0	0
0	0	0	0	0	0	0	1	0	0	0
0	0	0	0	0	0	0	1	0	0	0
0	0	0	0	0	0	0	1	0	0	0
0	0	0	0	0	0	0	1	0	0	0
0	0	0	0	0	0	0	1	0	0	0
0	0	0	0	0	0	0	1	0	0	0
0	0	0	0	0	0	0	1	0	0	0
0	0	0	0	0	0	0	1	0	0	0
0	0	0	0	0	0	0	1	0	0	0
0	0	0	0	0	0	0	1	0	0	0
0	0	0	0	0	0	0	1	0	0	0
0	0	0	0	0	0	0	1	0	0	0
0	0	0	0	0	0	0	1	0	0	0
0	0	0	0	0	0	0	1	0	0	0
0	0	0	0	0	0	0	1	0	0	0
0	0	0	0	0	0	0	1	0	0	0
0	0	0	0	0	0	0	1	0	0	0
0	0	0	0	0	0	0	1	0	0	0
0	0	0	0	0	0	0	1	0	0	0
0	0	0	0	0	0	0	1	0	0	0
0	0	0	0	0	0	0	1	0	0	0
0	0	0	0	0	0	0	1	0	0	0
0	0	0	0	0	0	0	1	0	0	0
0	0	0	0	0	0	0	1	0	0	0
0	0	0	0	0	0	0	1	0	0	0
0	0	0	0	0	0	0	1	0	0	0
0	0	0	0	0	0	0	1	0	0	0
0	0	0	0	0	0	0	1	0	0	0
0	0	0	0	0	0	0	1	0	0	0
0	0	0	0	0	0	0	1	0	0	0
0	0	0	0	0	0	0	1	0	0	0
0	0	0	0	0	0	0	1	0	0	0
0	0	0	0	0	0	0	1	0	0	0
0	0	0	0	0	0	0	1	0	0	0
0	0	0	0	0	0	0	1	0	0	0
0	0	0	0	0	0	0	1	0	0	0
0	0	0	0	0	0	0	1	0	0	0
0	0	0	0	0	0	0	1	0	0	0
0	0	0	0	0	0	0	1	0	0	0
0	0	0	0	0	0	0	1	0	0	0
0	0	0	0	0	0	0	1	0	0	0
0	0	0	0	0	0	0	1	0	0	0
0	0	0	0	0	0	0	1	0	0	0
0	0	0	0	0	0	0	1	0	0	0
0	0	0	0	0	0	0	1	0	0	0
0	0	0	0	0	0	0	1	0	0	0
0	0	0	0	0	0	0	1	0	0	0
0	0	0	0	0	0	0	1	0	0	0
0	0	0	0	0	0	0	1	0	0	0
0	0	0	0	0	0	0	1	0	0	0
0	0	0	0	0	0	0	1	0	0	0
0	0	0	0	0	0	0	1	0	0	0
0	0	0	0	0	0	0	1	0	0	0
0	0	0	0	0	0	0	1	0	0	0
0	0	0	0	0	0	0	1	0	0	0
0	0	0	0	0	0	0	1	0	0	0
0	0	0	0	0	0	0	1	0	0	0
0	0	0	0	0	0	0	1	0	0	0
0	0	0	0	0	0	0	1	0	0	0
0	0	0	0	0	0	0	1	0	0	0
0	0	0	0	0	0	0	1	0	0	0
0	0	0	0	0	0	0	1	0	0	0
0	0	0	0	0	0	0	1	0	0	0
0	0	0	0	0	0	0	1	0	0	0
0.0603333	0	0	0	0	0	0	0.939667	0	0	0
0.0607775	0	0	0	0	0	0	0.939223	0	0	0
0.0570886	0	0	0	0	0	0	0.942911	0	0	0
0.0551886	0	0	0	0	0	0	0.944811	0	0	0
0.0555308	0	0	0	0	0	0	0.944469	0	0	0
0.0512529	0	0	0	0	0	0	0.948747	0	0	0
0.0539349	0	0	0	0	0	0	0.946065	0	0	0
0.0538145	0	0	0	0	0	0	0.946186	0	0	0
0.0538092	0	0	0	0	0	0	0.946191	0	0	0
0.0521779	0	0	0	0	0	0	0.947822	0	0	0
0.0530753	0	0	0	0	0	0	0.946925	0	0	0
0.0529033	0	0	0	0	0	0	0.947097	0	0	0
0.0528574	0	0	0	0	0	0	0.947143	0	0	0
0.0492746	0	0	0	0	0	0	0.950725	0	0	0
0.0491485	0	0	0	0	0	0	0.950851	0	0	0
0.0485692	0	0	0	0	0	0	0.951431	0	0	0
0.0483441	0	0	0	0	0	0	0.951656	0	0	0
0.048089	0	0	0	0	0	0	0.951911	0	0	0
0.0478427	0	0	0	0	0	0	0.952157	0	0	0
0.046026	0	0	0	0	0	0	0.953974	0	0	0
0.0436792	0	0	0	0	0	0	0.956321	0	0	0
0.0437845	0	0	0	0	0	0	0.956216	0	0	0
0.0692184	0	0	0	0	0	0	0.930782	0	0	0
0.0687172	0	0	0	0	0	0	0.931283	0	0	0
0.066679	0	0	0	0	0	0	0.933321	0	0	0
0.0676553	0	0	0	0	0	0	0.932345	0	0	0
0.0759229	0	0	0	0	0	0	0.924077	0	0	0
0.0752751	0	0	0	0	0	0	0.924725	0	0	0
0.0735329	0	0	0	0	0	0	0.926467	0	0	0
0.07363	0	0	0	0	0	0	0.92637	0	0	0
0.0722249	0	0	0	0	0	0	0.927775	0	0	0
0.0718651	0	0	0	0	0	0	0.928135	0	0	0
0.0947228	0	0	0	0	0	0	0.905277	0	0	0
0.091543	0	0	0	0	0	0	0.908457	0	0	0
0.0907736	0	0	0	0	0	0	0.909226	0	0	0
0.0873693	0	0	0	0	0	0	0.912631	0	0	0
0.0859227	0	0	0	0	0	0	0.914077	0	0	0
0.0853722	0	0	0	0	0	0	0.914628	0	0	0
0.085291	0	0	0	0	0	0	0.914709	0	0	0
0.0791987	0	0	0	0	0	0	0.920801	0	0	0
0.0815563	0	0	0	0	0	0	0.918444	0	0	0
0.184617	0	0	0	0	0	0	0.815383	0	0	0
0.205727	0	0	0	0	0	0	0.794273	0	0	0
0.195616	0	0	0	0	0	0	0.804384	0	0	0
0.19905	0	0	0	0	0	0	0.80095	0	0	0
0.201699	0	0	0	0	0	0	0.798301	0	0	0
0.219777	0	0	0	0	0	0	0.780223	0	0	0
0.213725	0	0	0	0	0	0	0.786275	0	0	0
0.241039	0	0	0	0	0	0	0.75896	0	0	0
0.234774	0	0	0	0	0	0	0.765226	0	0	0
0.230698	0	0	0	0	0	0	0.769302	0	0	0
0.228066	0	0	0	0	0	0	0.771934	0	0	0
0.101128	0	0	0	0	0	0	0.898872	0	0	0
0.101771	0	0	0	0	0	0	0.898229	0	0	0
0.101463	0	0	0	0	0	0	0.898537	0	0	0
0.118031	0	0	0	0	0	0	0.881969	0	0	0
0.110525	0	0	0	0	0	0	0.889475	0	0	0
0.11207	0	0	0	0	0	0	0.88793	0	0	0
0.111434	0	0	0	0	0	0	0.888566	0	0	0
0.1655	0	0	0	0	0	0	0.8345	0	0	0
0.166431	0	0	0	0	0	0	0.833569	0	0	0
0.162113	0	0	0	0	0	0	0.837887	0	0	0
0.158307	0	0	0	0	0	0	0.841693	0	0	0
0.13323	0	0	0	0	0	0	0.86677	0	0	0
0.130916	0	0	0	0	0	0	0.869084	0	0	0
0.129612	0	0	0	0	0	0	0.870388	0	0	0
0.129941	0	0	0	0	0	0	0.870059	0	0	0
0.139236	0	0	0	0	0	0	0.860764	0	0	0
0.141556	0	0	0	0	0	0	0.858444	0	0	0
0.142181	0	0	0	0	0	0	0.857819	0	0	0
0.150843	0	0	0	0	0	0	0.849158	0	0	0
0.145269	0	0	0	0	0	0	0.854731	0	0	0
0.148765	0	0	0	0	0	0	0.851235	0	0	0
0.147702	0	0	0	0	0	0	0.852298	0	0	0
0.147371	0	0	0	0	0	0	0.852629	0	0	0
0.0967469	0	0.32633	0	0	0	0	0.377258	0.199665	0	0
0.0800628	0	0.308926	0	0	0	0	0.292562	0.318449	0	0
0.0757185	0	0	0	0	0	0	0.619654	0.304628	0	0
0.109558	0	0	0	0	0	0	0.449583	0.440858	0	0
0.39673	0	0	0	0	0	0	0	0.60327	0	0
0.381549	0	0	0	0	0	0	0.281364	0.337087	0	0
0.387854	0	0	0	0	0	0	0.321117	0.291028	0	0
0.275686	0	0	0	0	0	0	0.258598	0.465717	0	0
0.214747	0	0	0	0	0	0	0.193082	0.592171	0	0
0.412312	0	0	0	0	0	0	0	0.306799	0	0.280888
0.176506	0	0	0	0.267821	0	0	0	0.326738	0	0.228935
0.321768	0	0	0	0	0	0	0	0	0	0.678232
0.360491	0	0	0	0	0	0	0	0	0	0.639509
0.416677	0	0	0	0	0	0	0.395912	0	0	0.187411
0.404017	0	0	0	0	0	0	0.351186	0	0	0.244797
0.360509	0	0	0	0	0	0	0.362033	0	0	0.277457
0.242701	0	0	0	0	0	0	0.274202	0	0	0.483097
0.308967	0	0	0	0	0	0	0.26576	0	0	0.425273
0.34497	0	0	0	0	0	0	0.285988	0	0	0.369042
0.530058	0	0	0	0	0	0	0.265301	0	0	0.204641
0.462415	0	0	0	0	0	0	0.229446	0	0	0.308139
0.52041	0	0	0	0	0	0	0.17868	0	0	0.30091
0.490669	0	0	0	0	0	0	0.177477	0	0	0.331853
0.626554	0	0	0	0	0	0	0.174766	0	0	0.19868
0.566303	0	0	0	0	0	0	0.149966	0	0	0.283731
0.565691	0	0	0	0	0	0	0.135426	0	0	0.298883
0.600649	0	0	0	0	0	0	0.161256	0	0	0.238095
0.576104	0	0	0	0	0	0	0.16433	0	0	0.259566
0.64818	0	0	0	0	0	0	0	0	0	0.35182
0.680903	0	0	0	0	0	0	0	0	0	0.319097
0.69347	0	0	0	0	0	0	0	0	0	0.30653
0.586421	0	0	0	0	0	0	0	0	0	0.413579
0.512448	0	0	0	0	0	0	0	0	0	0.487552
0.49537	0	0	0	0	0	0	0	0	0	0.50463
0.497628	0	0	0	0	0	0	0	0	0	0.502372
0	0	0	0	0	0	0	0.551748	0	0	0.448252
0	0	0	0	0	0	0	0.553939	0	0	0.446061
0.10824	0	0	0	0	0	0	0.400292	0	0	0.491468
0.160618	0	0	0	0	0	0	0.409048	0	0	0.430334
0.110392	0	0	0	0	0	0	0.468937	0	0	0.420671
0.111228	0	0	0	0	0	0	0.453277	0	0	0.435495
0	0	0	0	0	0	0	0.731196	0	0	0.268804
0	0	0	0	0	0	0	0.732579	0	0	0.267421
0.0806611	0	0	0	0	0	0	0.66229	0	0	0.257049
0.104888	0	0	0	0	0	0	0.680707	0	0	0.214405
0.11202	0	0	0	0	0	0	0.675503	0	0	0.212478
0.13377	0	0	0	0	0	0	0.621458	0	0	0.244772
0.151648	0	0	0	0	0	0	0.567239	0	0	0.281113
0.13659	0	0	0	0	0	0	0.496851	0	0	0.366559
0.105444	0	0	0	0	0	0	0.544569	0	0	0.349987
0.0928729	0	0	0	0	0	0	0.583468	0	0	0.323659
0.216131	0	0	0	0	0	0	0.571845	0	0	0.212024
0.218833	0	0	0	0	0	0	0.516348	0	0	0.26482
0.179046	0	0	0	0	0	0	0.513782	0	0	0.307172
0.193124	0	0	0	0	0	0	0.518529	0	0	0.288347
0.260017	0	0	0	0	0	0	0.739983	0	0	0
0.254478	0	0	0	0	0	0	0.745522	0	0	0
0.279454	0	0	0	0	0	0	0.720546	0	0	0
0.268409	0	0	0	0	0	0	0.731591	0	0	0
0.272212	0	0	0	0	0	0	0.727788	0	0	0
0.290307	0	0	0	0	0	0	0.709693	0	0	0
0.292472	0	0	0	0	0	0	0.707528	0	0	0
0.304612	0	0	0	0	0	0	0.695388	0	0	0
0.29825	0	0	0	0	0	0	0.70175	0	0	0
0.299842	0	0	0	0	0	0	0.700158	0	0	0
0.299055	0	0	0	0	0	0	0.700945	0	0	0
0.32775	0	0	0	0	0	0	0.67225	0	0	0
0.311268	0	0	0	0	0	0	0.688732	0	0	0
0.309391	0	0	0	0	0	0	0.690609	0	0	0
0.316215	0	0	0	0	0	0	0.683785	0	0	0
0.314203	0	0	0	0	0	0	0.685797	0	0	0
0.451794	0	0	0	0	0	0	0.548206	0	0	0
0.447085	0	0	0	0	0	0	0.552915	0	0	0
0.449005	0	0	0	0	0	0	0.550995	0	0	0
0.448331	0	0	0	0	0	0	0.551669	0	0	0
0.424253	0	0	0	0	0	0	0.575747	0	0	0
0.44097	0	0	0	0	0	0	0.55903	0	0	0
0.434409	0	0	0	0	0	0	0.565591	0	0	0
0.432077	0	0	0	0	0	0	0.567923	0	0	0
0.432255	0	0	0	0	0	0	0.567745	0	0	0
0.34631	0	0	0	0	0	0	0.65369	0	0	0
0.339395	0	0	0	0	0	0	0.660605	0	0	0
0.342757	0	0	0	0	0	0	0.657243	0	0	0
0.364024	0	0	0	0	0	0	0.635976	0	0	0
0.358359	0	0	0	0	0	0	0.641641	0	0	0
0.355956	0	0	0	0	0	0	0.644044	0	0	0
0.354374	0	0	0	0	0	0	0.645626	0	0	0
0.354061	0	0	0	0	0	0	0.645939	0	0	0
0.353777	0	0	0	0	0	0	0.646223	0	0	0
0.413645	0	0	0	0	0	0	0.586355	0	0	0
0.413275	0	0	0	0	0	0	0.586725	0	0	0
0.381001	0	0	0	0	0	0	0.618999	0	0	0
0.384224	0	0	0	0	0	0	0.615776	0	0	0
0.388879	0	0	0	0	0	0	0.611121	0	0	0
0.396025	0	0	0	0	0	0	0.603975	0	0	0
0.396638	0	0	0	0	0	0	0.603362	0	0	0
0.39332	0	0	0	0	0	0	0.60668	0	0	0
0.394321	0	0	0	0	0	0	0.605679	0	0	0
0.6921	0	0	0	0	0	0	0.3079	0	0	0
0.672102	0	0	0	0	0	0	0.327898	0	0	0
0.671431	0	0	0	0	0	0	0.328569	0	0	0
0.667361	0	0	0	0	0	0	0.332639	0	0	0
0.669329	0	0	0	0	0	0	0.330671	0	0	0
0.678153	0	0	0	0	0	0	0.321847	0	0	0
0.677246	0	0	0	0	0	0	0.322754	0	0	0
0.685884	0	0	0	0	0	0	0.314116	0	0	0
0.682228	0	0	0	0	0	0	0.317772	0	0	0
0.650915	0	0	0	0	0	0	0.349085	0	0	0
0.647337	0	0	0	0	0	0	0.352663	0	0	0
0.638594	0	0	0	0	0	0	0.361406	0	0	0
0.642749	0	0	0	0	0	0	0.357251	0	0	0
0.625703	0	0	0	0	0	0	0.374297	0	0	0
0.626405	0	0	0	0	0	0	0.373595	0	0	0
0.628355	0	0	0	0	0	0	0.371645	0	0	0
0.629082	0	0	0	0	0	0	0.370918	0	0	0
0.620562	0	0	0	0	0	0	0.379438	0	0	0
0.61493	0	0	0	0	0	0	0.38507	0	0	0
0.614362	0	0	0	0	0	0	0.385638	0	0	0
0.589127	0	0	0	0	0	0	0.410873	0	0	0
0.578065	0	0	0	0	0	0	0.421935	0	0	0
0.583274	0	0	0	0	0	0	0.416726	0	0	0
0.581204	0	0	0	0	0	0	0.418796	0	0	0
0.566438	0	0	0	0	0	0	0.433562	0	0	0
0.561791	0	0	0	0	0	0	0.438209	0	0	0
0.556515	0	0	0	0	0	0	0.443485	0	0	0
0.558968	0	0	0	0	0	0	0.441032	0	0	0
0.5592	0	0	0	0	0	0	0.4408	0	0	0
0.559208	0	0	0	0	0	0	0.440792	0	0	0
0.557773	0	0	0	0	0	0	0.442227	0	0	0
0.558285	0	0	0	0	0	0	0.441715	0	0	0
0.539787	0	0	0	0	0	0	0.460213	0	0	0
0.546019	0	0	0	0	0	0	0.453981	0	0	0
0.548712	0	0	0	0	0	0	0.451288	0	0	0
0.550836	0	0	0	0	0	0	0.449164	0	0	0
0.551955	0	0	0	0	0	0	0.448045	0	0	0
0.480659	0	0	0	0	0	0	0.519341	0	0	0
0.486085	0	0	0	0	0	0	0.513915	0	0	0
0.48767	0	0	0	0	0	0	0.51233	0	0	0
0.465683	0	0	0	0	0	0	0.534317	0	0	0
0.473681	0	0	0	0	0	0	0.526319	0	0	0
0.523201	0	0	0	0	0	0	0.476799	0	0	0
0.529137	0	0	0	0	0	0	0.470863	0	0	0
0.533583	0	0	0	0	0	0	0.466417	0	0	0
0.495533	0	0	0	0	0	0	0.504467	0	0	0
0.499061	0	0	0	0	0	0	0.500939	0	0	0
0.513164	0	0	0	0	0	0	0.486836	0	0	0
0.512663	0	0	0	0	0	0	0.487337	0	0	0
0.512344	0	0	0	0	0	0	0.487656	0	0	0
0.512112	0	0	0	0	0	0	0.487888	0	0	0
0.507262	0	0	0	0	0	0	0.492738	0	0	0
0.504883	0	0	0	0	0	0	0.495117	0	0	0
0.505343	0	0	0	0	0	0	0.494657	0	0	0
0.420783	0	0	0.579217	0	0	0	0	0	0	0
0.340559	0	0	0.659441	0	0	0	0	0	0	0
0.216194	0	0	0.682687	0	0	0	0.101118	0	0	0
0.235557	0	0	0.764443	0	0	0	0	0	0	0
0.278079	0	0	0.721921	0	0	0	0	0	0	0
0	0	0	0.765192	0	0	0	0.234808	0	0	0
0	0	0	0.761883	0	0	0	0.238117	0	0	0
0	0	0	0.775275	0	0	0	0.224725	0	0	0
0	0	0	0.770359	0	0	0	0.229641	0	0	0
0	0	0	0.769113	0	0	0	0.230887	0	0	0
0	0	0	0.790095	0	0	0	0.209905	0	0	0
0	0	0	0.783952	0	0	0	0.216048	0	0	0
0	0	0	0.814349	0	0	0	0.185651	0	0	0
0	0	0	0.810978	0	0	0	0.189022	0	0	0
0	0	0	0.811487	0	0	0	0.188513	0	0	0
0	0	0	0.805636	0	0	0	0.194364	0	0	0
0	0	0	0.805482	0	0	0	0.194518	0	0	0
0	0	0	0.796136	0	0	0	0.203864	0	0	0
0	0	0	0.801425	0	0	0	0.198575	0	0	0
0	0	0	0.79822	0	0	0	0.20178	0	0	0
0	0	0	0.799744	0	0	0	0.200255	0	0	0
0	0	0	0.899333	0	0	0	0.100667	0	0	0
0	0	0	0.901832	0	0	0	0.0981681	0	0	0
0	0	0	0.900842	0	0	0	0.0991576	0	0	0
0	0	0	0.833197	0	0	0	0.166803	0	0	0
0	0	0	0.835291	0	0	0	0.164709	0	0	0
0	0	0	0.82824	0	0	0	0.17176	0	0	0
0	0	0	0.831616	0	0	0	0.168384	0	0	0
0	0	0	0.83034	0	0	0	0.16966	0	0	0
0	0	0	0.846926	0	0	0	0.153074	0	0	0
0	0	0	0.846956	0	0	0	0.153044	0	0	0
0	0	0	0.849783	0	0	0	0.150217	0	0	0
0	0	0	0.849723	0	0	0	0.150277	0	0	0
0	0	0	0.843424	0	0	0	0.156576	0	0	0
0	0	0	0.839911	0	0	0	0.160089	0	0	0
0	0	0	0.837499	0	0	0	0.162501	0	0	0
0	0	0	0.85792	0	0	0	0.14208	0	0	0
0	0	0	0.85929	0	0	0	0.14071	0	0	0
0	0	0	0.859054	0	0	0	0.140946	0	0	0
0	0	0	0.864467	0	0	0	0.135533	0	0	0
0	0	0	0.863103	0	0	0	0.136897	0	0	0
0	0	0	0.886083	0	0	0	0.113917	0	0	0
0	0	0	0.878667	0	0	0	0.121333	0	0	0
0	0	0	0.871521	0	0	0	0.128479	0	0	0
0	0	0	0.871424	0	0	0	0.128576	0	0	0
0.127267	0	0	0.872733	0	0	0	0	0	0	0
0	0	0	1	0	0	0	0	0	0	0
0	0	0	1	0	0	0	0	0	0	0
0	0	0	1	0	0	0	0	0	0	0
0	0	0	1	0	0	0	0	0	0	0
0	0	0	1	0	0	0	0	0	0	0
0	0	0	1	0	0	0	0	0	0	0
0	0	0	1	0	0	0	0	0	0	0
0	0	0	1	0	0	0	0	0	0	0
0	0	0	1	0	0	0	0	0	0	0
0	0	0	1	0	0	0	0	0	0	0
0	0	0	1	0	0	0	0	0	0	0
0	0	0	1	0	0	0	0	0	0	0
0	0	0	1	0	0	0	0	0	0	0
0	0	0	1	0	0	0	0	0	0	0
0	0	0	1	0	0	0	0	0	0	0
0	0	0	1	0	0	0	0	0	0	0
0	0	0	1	0	0	0	0	0	0	0
0	0	0	1	0	0	0	0	0	0	0
0	0	0	1	0	0	0	0	0	0	0
0	0	0	1	0	0	0	0	0	0	0
0	0	0	1	0	0	0	0	0	0	0
0	0	0	1	0	0	0	0	0	0	0
0	0	0	1	0	0	0	0	0	0	0
0	0	0	1	0	0	0	0	0	0	0
0	0	0	1	0	0	0	0	0	0	0
0	0	0	1	0	0	0	0	0	0	0
0	0	0	1	0	0	0	0	0	0	0
0	0	0	1	0	0	0	0	0	0	0
0	0	0	1	0	0	0	0	0	0	0
0	0	0	1	0	0	0	0	0	0	0
0	0	0	1	0	0	0	0	0	0	0
0	0	0	1	0	0	0	0	0	0	0
0	0	0	1	0	0	0	0	0	0	0
0	0	0	1	0	0	0	0	0	0	0
0	0	0	1	0	0	0	0	0	0	0
0	0	0	0.321222	0	0	0	0.479662	0	0	0.199117
0	0	0	0.358906	0	0	0	0.305621	0	0	0.335473
0	0	0	0.443231	0	0	0	0.235942	0	0	0.320827
0	0	0	0.587175	0	0	0	0.182047	0	0	0.230778
0	0	0	0.633687	0	0	0	0.128607	0	0	0.237706
0	0	0	0.641212	0	0	0	0.0971103	0	0	0.261678
0	0	0	0.715465	0	0	0	0	0	0	0.284535
0	0	0	0.683711	0	0	0	0	0	0	0.316289
0.0935134	0	0	0.59301	0	0	0	0	0	0	0.313477
0	0	0	0.619028	0	0	0	0	0	0	0.380972
0	0	0	0.601789	0	0	0	0	0	0	0.398211
0.196318	0	0	0.404976	0	0	0	0.193127	0	0	0.20558
0.29335	0	0	0.470046	0	0	0	0	0	0	0.236604
0.204916	0	0	0.468959	0	0	0	0	0	0	0.326125
0.269241	0	0	0.425584	0	0	0	0	0	0	0.305175
0	0	0.253163	0.333469	0	0	0	0.173907	0	0	0.239461
0	0	0.240335	0.302775	0	0	0	0.29401	0	0	0.16288
0	0	0.234711	0.292998	0	0	0	0.472292	0	0	0
0	0	0.232417	0.297961	0	0	0	0.469623	0	0	0
0	0	0.279451	0.301335	0	0	0	0.419214	0	0	0
0	0	0.30116	0.294079	0	0	0	0.404761	0	0	0
0	0	0.296402	0.292573	0	0	0	0.411025	0	0	0
0	0	0.256792	0.339069	0	0	0	0.40414	0	0	0
0	0	0.252997	0.318526	0	0	0	0.428477	0	0	0
0	0	0.254647	0.325365	0	0	0	0.419988	0	0	0
0	0	0.257065	0.320745	0	0	0	0.42219	0	0	0
0.0591012	0	0.263414	0.365895	0	0	0	0.311589	0	0	0
0	0	0.250203	0.374945	0	0	0	0.374852	0	0	0
0	0	0.236724	0.388569	0	0	0	0.374707	0	0	0
0	0	0.234928	0.38418	0	0	0	0.380892	0	0	0
0	0	0.282486	0.33449	0	0	0	0.383024	0	0	0
0	0	0.310408	0.348015	0	0	0	0.341577	0	0	0
0	0	0.287073	0.366375	0	0	0	0.346552	0	0	0
0	0	0.292397	0.346462	0	0	0	0.361141	0	0	0
0	0	0.291843	0.352764	0	0	0	0.355393	0	0	0
0.193243	0	0.277335	0.330369	0	0	0	0.199053	0	0	0
0.0752858	0	0.3134	0.41296	0	0	0	0.198354	0	0	0
0.0854779	0	0.268427	0.403101	0	0	0	0.242995	0	0	0
0.118345	0	0.272918	0.365332	0	0	0	0.243405	0	0	0
0.109689	0	0.2793	0.36754	0	0	0	0.24347	0	0	0
0	0	0.225256	0.575894	0	0	0	0.19885	0	0	0
0	0	0.224184	0.508855	0	0	0	0.266961	0	0	0
0	0	0.253221	0.533441	0	0	0	0.213338	0	0	0
0	0	0.235335	0.527877	0	0	0	0.236788	0	0	0
0	0	0.233334	0.534801	0	0	0	0.231865	0	0	0
0	0	0.227846	0.536713	0	0	0	0.235441	0	0	0
0	0	0.267919	0.4599	0	0	0	0.272181	0	0	0
0	0	0.26231	0.443346	0	0	0	0.294344	0	0	0
0	0	0.253165	0.419723	0	0	0	0.327112	0	0	0
0	0	0.224155	0.425053	0	0	0	0.350791	0	0	0
0	0	0.228652	0.436254	0	0	0	0.335094	0	0	0
0	0	0.230412	0.441572	0	0	0	0.328016	0	0	0
0	0	0.3288	0.457618	0	0	0	0	0	0	0.213583
0	0	0.259873	0.573412	0	0	0	0.166715	0	0	0
0	0	0.281076	0.585791	0	0	0	0.133132	0	0	0
0	0	0.301055	0.620723	0	0	0	0.0782219	0	0	0
0	0	0.24467	0.625948	0	0	0	0.129382	0	0	0
0	0	0.267391	0.630593	0	0	0	0.102016	0	0	0
0	0	0.262323	0.737677	0	0	0	0	0	0	0
0	0	0.280476	0.719524	0	0	0	0	0	0	0
0	0	0.295226	0.704774	0	0	0	0	0	0	0
0	0	0.291896	0.708104	0	0	0	0	0	0	0
0	0	0.400041	0.599959	0	0	0	0	0	0	0
0	0	0.380642	0.619358	0	0	0	0	0	0	0
0	0	0.372966	0.627034	0	0	0	0	0	0	0
0	0	0.323706	0.676294	0	0	0	0	0	0	0
0	0	0.326695	0.673305	0	0	0	0	0	0	0
0	0	0.342793	0.657207	0	0	0	0	0	0	0
0	0	0.35585	0.64415	0	0	0	0	0	0	0
0	0	0.611489	0.388511	0	0	0	0	0	0	0
0	0	0.611279	0.388721	0	0	0	0	0	0	0
0	0	0.505962	0.494038	0	0	0	0	0	0	0
0	0	0.505543	0.494457	0	0	0	0	0	0	0
0	0	0.566965	0.433035	0	0	0	0	0	0	0
0	0	0.553182	0.446818	0	0	0	0	0	0	0
0	0	0.552146	0.447854	0	0	0	0	0	0	0
0	0	0.547134	0.452866	0	0	0	0	0	0	0
0	0	0.54555	0.45445	0	0	0	0	0	0	0
0.0686738	0	0.37432	0.557006	0	0	0	0	0	0	0
0	0	0.455803	0.544197	0	0	0	0	0	0	0
0	0	0.448014	0.551986	0	0	0	0	0	0	0
0.207464	0	0.340748	0.451788	0	0	0	0	0	0	0
0.165077	0	0.346333	0.380639	0	0	0	0.107951	0	0	0
0.0869332	0	0.420999	0.39764	0	0	0	0.0944275	0	0	0
0.104938	0	0.392456	0.395369	0	0	0	0.107237	0	0	0
0	0	0.274187	0.484439	0	0	0	0.241374	0	0	0
0	0	0.313311	0.471479	0	0	0	0.21521	0	0	0
0	0	0.316418	0.529358	0	0	0	0.154224	0	0	0
0	0	0.332814	0.50478	0	0	0	0.162406	0	0	0
0	0	0.361961	0.439963	0	0	0	0.198076	0	0	0
0	0	0.358345	0.47453	0	0	0	0.167126	0	0	0
0	0	0.361885	0.477341	0	0	0	0.160774	0	0	0
0	0	0.326459	0.480142	0	0	0	0.193398	0	0	0
0	0	0.346542	0.469546	0	0	0	0.183912	0	0	0
0	0	0.405751	0.486126	0	0	0	0.108123	0	0	0
0	0	0.40957	0.506508	0	0	0	0.0839217	0	0	0
0	0	0.355216	0.532299	0	0	0	0.112486	0	0	0
0	0	0.354684	0.546046	0	0	0	0.0992708	0	0	0
0	0	0.354522	0.55827	0	0	0	0.0872078	0	0	0
0	0	0.364998	0.509663	0	0	0	0.125339	0	0	0
0	0	0.382925	0.523362	0	0	0	0.0937129	0	0	0
0	0	0.452562	0.463267	0	0	0	0.0841705	0	0	0
0	0	0.460677	0.443439	0	0	0	0.0958843	0	0	0
0	0	0.420334	0.444004	0	0	0	0.135662	0	0	0
0	0	0.440179	0.4284	0	0	0	0.13142	0	0	0
0	0	0.42854	0.428502	0	0	0	0.142958	0	0	0
0	0	0.42346	0.423767	0	0	0	0.152773	0	0	0
0	0	0.400216	0.463953	0	0	0	0.135832	0	0	0
0	0	0.384688	0.450908	0	0	0	0.164404	0	0	0
0	0	0.390118	0.436827	0	0	0	0.173055	0	0	0
0	0	0.394714	0.437651	0	0	0	0.167635	0	0	0
0	0	0.455279	0.32769	0	0	0	0.217031	0	0	0
0	0	0.487522	0.333869	0	0	0	0.178609	0	0	0
0	0	0.435031	0.362031	0	0	0	0.202937	0	0	0
0	0	0.453572	0.370731	0	0	0	0.175697	0	0	0
0	0	0.471726	0.346984	0	0	0	0.181291	0	0	0
0	0	0.456074	0.352676	0	0	0	0.19125	0	0	0
0	0	0.525127	0.323503	0	0	0	0.15137	0	0	0
0	0	0.516899	0.350134	0	0	0	0.132967	0	0	0
0	0	0.51906	0.356702	0	0	0	0.124239	0	0	0
0	0	0.510338	0.387743	0	0	0	0.10192	0	0	0
0	0	0.464056	0.404421	0	0	0	0.131523	0	0	0
0	0	0.48683	0.37407	0	0	0	0.1391	0	0	0
0	0	0.431693	0.275377	0	0	0	0.29293	0	0	0
0	0	0.409271	0.367771	0	0	0	0.222959	0	0	0
0	0	0.402611	0.36119	0	0	0	0.236199	0	0	0
0	0	0.38452	0.350678	0	0	0	0.264802	0	0	0
0	0	0.376994	0.375186	0	0	0	0.24782	0	0	0
0	0	0.354073	0.404322	0	0	0	0.241605	0	0	0
0	0	0.344705	0.419414	0	0	0	0.235881	0	0	0
0	0	0.326131	0.393665	0	0	0	0.280205	0	0	0
0	0	0.311485	0.405014	0	0	0	0.283502	0	0	0
0.392415	0	0	0.283211	0	0	0	0.324374	0	0	0
0.37931	0	0	0.365067	0	0	0	0.255623	0	0	0
0.447825	0	0	0.329252	0	0	0	0.222923	0	0	0
0.425185	0	0	0.30719	0	0	0	0.267625	0	0	0
0.534376	0	0	0.465624	0	0	0	0	0	0	0
0.467053	0	0	0.364317	0	0	0	0.168629	0	0	0
0.550189	0	0	0.354436	0	0	0	0.0953756	0	0	0
0.535323	0	0	0.341502	0	0	0	0.123175	0	0	0
0.538058	0	0	0.348595	0	0	0	0.113348	0	0	0
0.235901	0	0	0.40456	0	0	0	0.359539	0	0	0
0.275603	0	0	0.402117	0	0	0	0.32228	0	0	0
0.259891	0	0	0.417881	0	0	0	0.322228	0	0	0
0.190144	0	0	0.338396	0	0	0	0.47146	0	0	0
0.281392	0	0	0.342172	0	0	0	0.376435	0	0	0
0.24733	0	0	0.32088	0	0	0	0.43179	0	0	0
0.231957	0	0	0.55226	0	0	0	0.215782	0	0	0
0.293315	0	0	0.541935	0	0	0	0.164749	0	0	0
0.365292	0	0	0.49168	0	0	0	0.143027	0	0	0
0.345511	0	0	0.440729	0	0	0	0.21376	0	0	0
0	0	0	0.574033	0	0	0	0.425967	0	0	0
0	0	0	0.573782	0	0	0	0.426218	0	0	0
0	0	0	0.575674	0	0	0	0.424326	0	0	0
0	0	0	0.576314	0	0	0	0.423686	0	0	0
0	0	0	0.576449	0	0	0	0.423552	0	0	0
0	0	0	0.59079	0	0	0	0.40921	0	0	0
0	0	0	0.586372	0	0	0	0.413628	0	0	0
0	0	0	0.581927	0	0	0	0.418073	0	0	0
0	0	0	0.583042	0	0	0	0.416958	0	0	0
0	0	0	0.564712	0	0	0	0.435288	0	0	0
0	0	0	0.565661	0	0	0	0.434338	0	0	0
0	0	0	0.566177	0	0	0	0.433823	0	0	0
0	0	0	0.559049	0	0	0	0.440951	0	0	0
0	0	0	0.558208	0	0	0	0.441792	0	0	0
0	0	0	0.560968	0	0	0	0.439032	0	0	0
0	0	0	0.562773	0	0	0	0.437227	0	0	0
0	0	0	0.562468	0	0	0	0.437532	0	0	0
0	0	0	0.54708	0	0	0	0.45292	0	0	0
0	0	0	0.552035	0	0	0	0.447965	0	0	0
0	0	0	0.60488	0	0	0	0.39512	0	0	0
0	0	0	0.606692	0	0	0	0.393308	0	0	0
0	0	0	0.599217	0	0	0	0.400783	0	0	0
0	0	0	0.601077	0	0	0	0.398923	0	0	0
0	0	0	0.602349	0	0	0	0.397651	0	0	0
0	0	0	0.616868	0	0	0	0.383132	0	0	0
0	0	0	0.609367	0	0	0	0.390633	0	0	0
0	0	0	0.612751	0	0	0	0.387249	0	0	0
0	0	0	0.612384	0	0	0	0.387616	0	0	0
0	0	0	0.626699	0	0	0	0.373301	0	0	0
0	0	0	0.622078	0	0	0	0.377922	0	0	0
0	0	0	0.624759	0	0	0	0.375241	0	0	0
0	0	0	0.624321	0	0	0	0.375679	0	0	0
0	0	0	0.624032	0	0	0	0.375967	0	0	0
0	0	0	0.644024	0	0	0	0.355976	0	0	0
0	0	0	0.64466	0	0	0	0.35534	0	0	0
0	0	0	0.640317	0	0	0	0.359683	0	0	0
0	0	0	0.641821	0	0	0	0.358179	0	0	0
0	0	0	0.631149	0	0	0	0.368851	0	0	0
0	0	0	0.636807	0	0	0	0.363193	0	0	0
0	0	0	0.636653	0	0	0	0.363347	0	0	0
0	0	0	0.742987	0	0	0	0.257013	0	0	0
0	0	0	0.726906	0	0	0	0.273094	0	0	0
0	0	0	0.721077	0	0	0	0.278923	0	0	0
0	0	0	0.716929	0	0	0	0.283071	0	0	0
0	0	0	0.67148	0	0	0	0.32852	0	0	0
0	0	0	0.67271	0	0	0	0.32729	0	0	0
0	0	0	0.673677	0	0	0	0.326323	0	0	0
0	0	0	0.677633	0	0	0	0.322367	0	0	0
0	0	0	0.675192	0	0	0	0.324808	0	0	0
0	0	0	0.666049	0	0	0	0.333951	0	0	0
0	0	0	0.658666	0	0	0	0.341334	0	0	0
0	0	0	0.705164	0	0	0	0.294836	0	0	0
0	0	0	0.69851	0	0	0	0.30149	0	0	0
0	0	0	0.694015	0	0	0	0.305985	0	0	0
0	0	0	0.694563	0	0	0	0.305437	0	0	0
0	0	0	0.695073	0	0	0	0.304927	0	0	0
0	0	0	0.683676	0	0	0	0.316324	0	0	0
0	0	0	0.689849	0	0	0	0.310151	0	0	0
0	0	0	0.688552	0	0	0	0.311448	0	0	0
0.0778369	0	0	0.726242	0	0	0	0.195922	0	0	0
0.0941512	0	0	0.647069	0	0	0	0.25878	0	0	0
0	0	0	0.333938	0	0	0	0.666062	0	0	0
0	0	0	0.333138	0	0	0	0.666862	0	0	0
0	0	0	0.33337	0	0	0	0.66663	0	0	0
0	0	0	0.333529	0	0	0	0.666471	0	0	0
0	0	0	0.326623	0	0	0	0.673377	0	0	0
0	0	0	0.329037	0	0	0	0.670963	0	0	0
0	0	0	0.327953	0	0	0	0.672047	0	0	0
0	0	0	0.347905	0	0	0	0.652095	0	0	0
0	0	0	0.348178	0	0	0	0.651822	0	0	0
0	0	0	0.35009	0	0	0	0.64991	0	0	0
0	0	0	0.351525	0	0	0	0.648475	0	0	0
0	0	0	0.352071	0	0	0	0.647929	0	0	0
0	0	0	0.352342	0	0	0	0.647658	0	0	0
0	0	0	0.344079	0	0	0	0.655921	0	0	0
0	0	0	0.343025	0	0	0	0.656975	0	0	0
0	0	0	0.336825	0	0	0	0.663175	0	0	0
0	0	0	0.339625	0	0	0	0.660375	0	0	0
0	0	0	0.340658	0	0	0	0.659342	0	0	0
0	0	0	0.340158	0	0	0	0.659842	0	0	0
0	0	0	0.366302	0	0	0	0.633698	0	0	0
0	0	0	0.364626	0	0	0	0.635374	0	0	0
0	0	0	0.363713	0	0	0	0.636287	0	0	0
0	0	0	0.36051	0	0	0	0.63949	0	0	0
0	0	0	0.356285	0	0	0	0.643715	0	0	0
0	0	0	0.357684	0	0	0	0.642316	0	0	0
0	0	0	0.358979	0	0	0	0.641021	0	0	0
0	0	0	0.371727	0	0	0	0.628273	0	0	0
0	0	0	0.380949	0	0	0	0.619051	0	0	0
0	0	0	0.378154	0	0	0	0.621846	0	0	0
0	0	0	0.379169	0	0	0	0.620831	0	0	0
0	0	0	0.379244	0	0	0	0.620756	0	0	0
0	0	0	0.378865	0	0	0	0.621135	0	0	0
0	0	0	0.378709	0	0	0	0.621291	0	0	0
0	0	0	0.374148	0	0	0	0.625852	0	0	0
0	0	0	0.375624	0	0	0	0.624376	0	0	0
0	0	0	0.377111	0	0	0	0.622889	0	0	0
0	0	0	0.376604	0	0	0	0.623396	0	0	0
0	0	0	0.387597	0	0	0	0.612403	0	0	0
0	0	0	0.385035	0	0	0	0.614965	0	0	0
0	0	0	0.385	0	0	0	0.615	0	0	0
0	0	0	0.390443	0	0	0	0.609557	0	0	0
0	0	0	0.393383	0	0	0	0.606617	0	0	0
0	0	0	0.394295	0	0	0	0.605705	0	0	0
0.0545485	0	0	0.282925	0	0	0	0.662527	0	0	0
0	0	0	0.295594	0	0	0	0.704406	0	0	0
0	0	0	0.3018	0	0	0	0.6982	0	0	0
0	0	0	0.29782	0	0	0	0.70218	0	0	0
0	0	0	0.299591	0	0	0	0.700409	0	0	0
0	0	0	0.299104	0	0	0	0.700896	0	0	0
0	0	0	0.311932	0	0	0	0.688068	0	0	0
0	0	0	0.312229	0	0	0	0.687771	0	0	0
0	0	0	0.313194	0	0	0	0.686806	0	0	0
0	0	0	0.313565	0	0	0	0.686435	0	0	0
0	0	0	0.317654	0	0	0	0.682346	0	0	0
0	0	0	0.31524	0	0	0	0.68476	0	0	0
0	0	0	0.31582	0	0	0	0.68418	0	0	0
0	0	0	0.304967	0	0	0	0.695033	0	0	0
0	0	0	0.307836	0	0	0	0.692164	0	0	0
0	0	0	0.309471	0	0	0	0.690529	0	0	0
0	0	0	0.284808	0	0	0	0.715192	0	0	0
0	0	0	0.286336	0	0	0	0.713664	0	0	0
0	0	0	0.28813	0	0	0	0.71187	0	0	0
0	0	0	0.28774	0	0	0	0.71226	0	0	0
0	0	0	0.289527	0	0	0	0.710473	0	0	0
0	0	0	0.290138	0	0	0	0.709862	0	0	0
0	0	0	0.290697	0	0	0	0.709303	0	0	0
0	0	0	0.279284	0	0	0	0.720716	0	0	0
0	0	0	0.280738	0	0	0	0.719262	0	0	0
0	0	0	0.281616	0	0	0	0.718384	0	0	0
0	0	0	0.281541	0	0	0	0.718459	0	0	0
0	0	0	0.281498	0	0	0	0.718502	0	0	0
0	0	0	0.276926	0	0	0	0.723074	0	0	0
0	0	0	0.274769	0	0	0	0.725231	0	0	0
0	0	0	0.255287	0	0	0	0.744713	0	0	0
0	0	0	0.26478	0	0	0	0.73522	0	0	0
0	0	0	0.267814	0	0	0	0.732186	0	0	0
0	0	0	0.534816	0	0	0	0.465184	0	0	0
0	0	0	0.536416	0	0	0	0.463584	0	0	0
0	0	0	0.536845	0	0	0	0.463155	0	0	0
0	0	0	0.531028	0	0	0	0.468972	0	0	0
0	0	0	0.525891	0	0	0	0.474109	0	0	0
0	0	0	0.528226	0	0	0	0.471774	0	0	0
0	0	0	0.518027	0	0	0	0.481973	0	0	0
0	0	0	0.51291	0	0	0	0.48709	0	0	0
0	0	0	0.515347	0	0	0	0.484653	0	0	0
0	0	0	0.515784	0	0	0	0.484216	0	0	0
0	0	0	0.51482	0	0	0	0.48518	0	0	0
0	0	0	0.514193	0	0	0	0.485807	0	0	0
0	0	0	0.506239	0	0	0	0.493761	0	0	0
0	0	0	0.506343	0	0	0	0.493657	0	0	0
0	0	0	0.510271	0	0	0	0.489729	0	0	0
0	0	0	0.50957	0	0	0	0.49043	0	0	0
0	0	0	0.484797	0	0	0	0.515203	0	0	0
0	0	0	0.483843	0	0	0	0.516157	0	0	0
0	0	0	0.490398	0	0	0	0.509602	0	0	0
0	0	0	0.492558	0	0	0	0.507442	0	0	0
0	0	0	0.493283	0	0	0	0.506717	0	0	0
0	0	0	0.493086	0	0	0	0.506914	0	0	0
0	0	0	0.503024	0	0	0	0.496977	0	0	0
0	0	0	0.502004	0	0	0	0.497996	0	0	0
0	0	0	0.496114	0	0	0	0.503886	0	0	0
0	0	0	0.500571	0	0	0	0.499429	0	0	0
0	0	0	0.498383	0	0	0	0.501617	0	0	0
0	0	0	0.498421	0	0	0	0.501579	0	0	0
0	0	0	0.499007	0	0	0	0.500993	0	0	0
0	0	0	0.498919	0	0	0	0.501081	0	0	0
0	0	0	0.405268	0	0	0	0.594732	0	0	0
0	0	0	0.410268	0	0	0	0.589732	0	0	0
0	0	0	0.415294	0	0	0	0.584706	0	0	0
0	0	0	0.423684	0	0	0	0.576316	0	0	0
0	0	0	0.418767	0	0	0	0.581233	0	0	0
0	0	0	0.419014	0	0	0	0.580986	0	0	0
0	0	0	0.421558	0	0	0	0.578442	0	0	0
0	0	0	0.420516	0	0	0	0.579484	0	0	0
0	0	0	0.459414	0	0	0	0.540586	0	0	0
0	0	0	0.457807	0	0	0	0.542193	0	0	0
0	0	0	0.474299	0	0	0	0.525701	0	0	0
0	0	0	0.4722	0	0	0	0.5278	0	0	0
0	0	0	0.467057	0	0	0	0.532942	0	0	0
0	0	0	0.466266	0	0	0	0.533734	0	0	0
0	0	0	0.465876	0	0	0	0.534124	0	0	0
0	0	0	0.468205	0	0	0	0.531795	0	0	0
0	0	0	0.469671	0	0	0	0.530329	0	0	0
0	0	0	0.469223	0	0	0	0.530777	0	0	0
0	0	0	0.432688	0	0	0	0.567312	0	0	0
0	0	0	0.440752	0	0	0	0.559248	0	0	0
0	0	0	0.442478	0	0	0	0.557522	0	0	0
0	0	0	0.447846	0	0	0	0.552154	0	0	0
0	0	0	0.44615	0	0	0	0.55385	0	0	0
0	0	0	0.445585	0	0	0	0.554415	0	0	0
0.0769481	0	0	0.36466	0	0	0	0.558392	0	0	0
0.0594866	0	0	0.377988	0	0	0	0.562525	0	0	0
0.139408	0	0	0.349882	0	0	0	0.51071	0	0	0
0.12044	0	0	0.324461	0	0	0	0.555099	0	0	0
0.0946402	0	0	0.517715	0	0	0	0.387645	0	0	0
0.133783	0	0	0.440406	0	0	0	0.425811	0	0	0
0.13235	0	0	0.458327	0	0	0	0.409323	0	0	0
0.131848	0	0	0.393787	0	0	0	0.474365	0	0	0
0.0795009	0	0	0.445304	0	0	0	0.475195	0	0	0
0	0	1	0	0	0	0	0	0	0	0
0	0	1	0	0	0	0	0	0	0	0
0	0	1	0	0	0	0	0	0	0	0
0	0	1	0	0	0	0	0	0	0	0
0	0	1	0	0	0	0	0	0	0	0
0	0	1	0	0	0	0	0	0	0	0
0	0	1	0	0	0	0	0	0	0	0
0	0	1	0	0	0	0	0	0	0	0
0	0	1	0	0	0	0	0	0	0	0
0	0	1	0	0	0	0	0	0	0	0
0	0	1	0	0	0	0	0	0	0	0
0	0	1	0	0	0	0	0	0	0	0
0.177974	0	0.376843	0	0	0	0	0.445183	0	0	0
0.151528	0	0.356474	0	0	0	0	0.491998	0	0	0
0.144177	0	0.349733	0	0	0	0	0.50609	0	0	0
0.0740686	0	0.424685	0	0	0	0	0.501247	0	0	0
0.108352	0	0.357728	0	0	0	0	0.53392	0	0	0
0.0755369	0	0.35242	0	0	0	0	0.572043	0	0	0
0	0	0.450415	0	0	0	0	0.549585	0	0	0
0	0	0.463329	0	0	0	0	0.53667	0	0	0
0	0	0.46016	0	0	0	0	0.53984	0	0	0
0	0	0.373638	0	0	0	0	0.626362	0	0	0
0	0	0.39119	0	0	0	0	0.60881	0	0	0
0	0	0.382532	0	0	0	0	0.617468	0	0	0
0	0	0.427405	0	0	0	0	0.572595	0	0	0
0	0	0.41068	0	0	0	0	0.58932	0	0	0
0	0	0.414905	0	0	0	0	0.585095	0	0	0
0	0	0.413782	0	0	0	0	0.586218	0	0	0
0	0	0.414148	0	0	0	0	0.585852	0	0	0
0.0650281	0	0.256085	0	0	0	0	0.678887	0	0	0
0.129375	0	0.264255	0	0	0	0	0.606371	0	0	0
0.0884215	0	0.279024	0	0	0	0	0.632554	0	0	0
0	0	0.265471	0	0	0	0	0.734529	0	0	0
0	0	0.254279	0	0	0	0	0.745721	0	0	0
0	0	0.25032	0	0	0	0	0.749681	0	0	0
0	0	0.250072	0	0	0	0	0.749928	0	0	0
0	0	0.285756	0	0	0	0	0.714244	0	0	0
0	0	0.298631	0	0	0	0	0.701369	0	0	0
0	0	0.304474	0	0	0	0	0.695526	0	0	0
0.051548	0	0.320104	0	0	0	0	0.628348	0	0	0
0	0	0.35218	0	0	0	0	0.64782	0	0	0
0	0	0.356255	0	0	0	0	0.643745	0	0	0
0	0	0.35998	0	0	0	0	0.64002	0	0	0
0	0	0.325876	0	0	0	0	0.674124	0	0	0
0	0	0.320702	0	0	0	0	0.679298	0	0	0
0	0	0.323183	0	0	0	0	0.676817	0	0	0
0	0	0.343192	0	0	0	0	0.656808	0	0	0
0	0	0.336169	0	0	0	0	0.663831	0	0	0
0.102919	0	0.483169	0	0	0	0	0.413912	0	0	0
0	0	0.506279	0	0	0	0	0.493721	0	0	0
0	0	0.509227	0	0	0	0	0.490773	0	0	0
0	0	0.510438	0	0	0	0	0.489562	0	0	0
0	0	0.529667	0	0	0	0	0.470333	0	0	0
0	0	0.529753	0	0	0	0	0.470247	0	0	0
0	0	0.522669	0	0	0	0	0.477331	0	0	0
0	0	0.525039	0	0	0	0	0.474961	0	0	0
0	0	0.547119	0	0	0	0	0.452881	0	0	0
0	0	0.535754	0	0	0	0	0.464246	0	0	0
0	0	0.538378	0	0	0	0	0.461622	0	0	0
0	0	0.629475	0	0	0	0	0.370525	0	0	0
0	0	0.611041	0	0	0	0	0.388959	0	0	0
0	0	0.615567	0	0	0	0	0.384433	0	0	0
0	0	0.619101	0	0	0	0	0.380899	0	0	0
0	0	0.582426	0	0	0	0	0.417574	0	0	0
0	0	0.588987	0	0	0	0	0.411013	0	0	0
0	0	0.590011	0	0	0	0	0.409989	0	0	0
0	0	0.564129	0	0	0	0	0.435871	0	0	0
0	0	0.555569	0	0	0	0	0.444431	0	0	0
0	0	0.555784	0	0	0	0	0.444216	0	0	0
0.117564	0	0.607241	0	0	0	0	0.275195	0	0	0
0.162216	0	0.653037	0	0	0	0	0.184747	0	0	0
0	0	0.680491	0	0	0	0	0.319508	0	0	0
0	0	0.685203	0	0	0	0	0.314797	0	0	0
0	0	0.688927	0	0	0	0	0.311073	0	0	0
0	0	0.659532	0	0	0	0	0.340468	0	0	0
0	0	0.645933	0	0	0	0	0.354067	0	0	0
0	0	0.754902	0	0	0	0	0.245098	0	0	0
0	0	0.746423	0	0	0	0	0.253577	0	0	0
0	0	0.741139	0	0	0	0	0.258861	0	0	0
0	0	0.741913	0	0	0	0	0.258087	0	0	0
0	0	0.775366	0	0	0	0	0.224634	0	0	0
0	0	0.807383	0	0	0	0	0.192617	0	0	0
0	0	0.801149	0	0	0	0	0.198851	0	0	0
0	0	0.796115	0	0	0	0	0.203885	0	0	0
0	0	0.486	0	0	0	0	0	0.514	0	0
0	0	0.490581	0	0	0	0	0	0.509419	0	0
0.133783	0	0.527971	0	0	0	0	0	0.338246	0	0
0	0	0.68191	0	0	0	0	0	0.31809	0	0
0	0	0.621899	0	0	0	0	0	0.378101	0	0
0	0	0.629754	0	0	0	0	0	0.370246	0	0
0	0	0.568524	0	0	0	0	0	0.431476	0	0
0	0	0.581699	0	0	0	0	0	0.418301	0	0
0	0	0.347647	0	0	0	0	0	0.393214	0	0.259139
0	0	0.467738	0	0	0	0	0	0.260643	0	0.271619
0	0	0.382329	0	0	0	0	0	0.246252	0	0.371419
0	0	0.39417	0	0	0	0	0	0.257323	0	0.348507
0.152556	0	0.343048	0	0	0	0	0	0.315895	0	0.1885
0.0562592	0	0.343177	0	0	0	0	0.193165	0.17646	0	0.230938
0.0811305	0	0.260684	0	0	0	0	0.110213	0.323693	0	0.22428
0	0	0.304507	0	0	0	0	0.126065	0.272719	0	0.29671
0.305059	0	0.356753	0	0	0	0	0.113589	0	0	0.224599
0.319439	0	0.4044	0	0	0	0	0	0	0	0.276161
0.439643	0	0.560357	0	0	0	0	0	0	0	0
0.441066	0	0.558934	0	0	0	0	0	0	0	0
0.411182	0	0.405718	0	0	0	0	0.1831	0	0	0
0.25373	0	0.449309	0	0	0	0	0.296961	0	0	0
0	0	0.284481	0	0	0	0	0.49962	0	0	0.215899
0	0	0.293254	0	0	0	0	0.437366	0	0	0.26938
0.122048	0	0.370853	0	0	0	0	0.199951	0	0	0.307148
0.0727162	0	0.385143	0	0	0	0	0.226598	0	0	0.315543
0.192719	0	0.333276	0	0	0	0	0.110961	0	0	0.363044
0.142868	0	0.388078	0	0	0	0	0.133807	0	0	0.335247
0	0	0.376585	0	0	0	0	0.392609	0	0	0.230806
0	0	0.429179	0	0	0	0	0.345188	0	0	0.225633
0	0	0.471933	0	0	0	0	0.301883	0	0	0.226183
0	0	0.462705	0	0	0	0	0.304637	0	0	0.232658
0	0	0.384586	0	0	0	0	0.340716	0	0	0.274697
0	0	0.433513	0	0	0	0	0.279102	0	0	0.287385
0	0	0.40535	0	0	0	0	0.300729	0	0	0.293922
0	0	0.486933	0	0	0	0	0.212317	0	0	0.30075
0	0	0.42577	0	0	0	0	0.185404	0	0	0.388827
0	0	0.348872	0	0	0	0	0.254957	0	0	0.396171
0	0	0.3699	0	0	0	0	0.251526	0	0	0.378574
0	0	0.401255	0	0	0	0	0.258598	0	0	0.340147
0	0	0.364606	0	0	0	0	0.290911	0	0	0.344482
0.0859108	0	0.435415	0	0	0	0	0	0	0	0.478674
0.150204	0	0.444568	0	0	0	0	0	0	0	0.405228
0	0	0.50935	0	0	0	0	0	0	0	0.49065
0	0	0.445487	0	0	0	0	0	0	0	0.554513
0	0	0.4205	0	0	0	0	0	0	0	0.5795
0	0	0.637554	0	0	0	0	0.108592	0	0	0.253854
0	0	0.600794	0	0	0	0	0.16019	0	0	0.239015
0	0	0.59034	0	0	0	0	0.130238	0	0	0.279421
0	0	0.731865	0	0	0	0	0	0	0	0.268135
0	0	0.720688	0	0	0	0	0	0	0	0.279312
0	0	0.619865	0	0	0	0	0	0	0	0.380135
0	0	0.661785	0	0	0	0	0	0	0	0.338215
0	0	0.673439	0	0	0	0	0	0	0	0.326561
0	0	0.680563	0	0	0	0	0	0	0	0.319437
0	0	0	0	0	0	1	0	0	0	0
0	0	0	0	0	0	1	0	0	0	0
0	0	0	0	0	0	0.713188	0	0	0	0.286812
0	0	0	0	0	0	0.730785	0	0	0	0.269215
0	0	0	0	0	0	0.72398	0	0	0	0.27602
0	0	0	0	0	0	0.384595	0	0.615405	0	0
0	0	0	0	0	0	0.3986	0	0.6014	0	0
0	0	0	0	0	0	0.701971	0	0.298029	0	0
0	0	0	0	0	0	0.492534	0	0.284347	0	0.223119
0	0	0	0	0	0	0.419922	0	0.27195	0	0.308128
0	0.365747	0	0	0	0	0.365337	0	0	0	0.268916
0	0.450043	0	0	0	0	0.315052	0	0	0	0.234905
0	0.298094	0	0	0.309932	0	0.391974	0	0	0	0
0	0.378983	0	0	0.270635	0	0.350382	0	0	0	0
0	0.339842	0	0	0.273987	0	0.386171	0	0	0	0
0	0.389005	0	0	0.177379	0	0.273875	0	0	0	0.15974
0	0.310165	0	0	0.229185	0	0.270315	0	0	0	0.190335
0	0	0.30727	0	0.194291	0	0.304216	0	0.194222	0	0
0	0	0.405446	0	0	0	0.372997	0	0	0	0.221558
0	0	0.433421	0	0	0	0.566579	0	0	0	0
0	0	0.559686	0	0	0	0.440314	0	0	0	0
0	0.275171	0.301754	0.245733	0	0	0	0	0	0	0.177343
0	0.254307	0.291605	0.271969	0	0	0	0	0	0	0.18212
0	0.280918	0.235794	0.267831	0	0	0	0	0	0	0.215456
0	0.314954	0.217193	0.312684	0	0	0	0	0	0	0.155169
0	0.266623	0.253294	0.308658	0	0	0	0	0	0	0.171425
0	0.27451	0.455661	0.269828	0	0	0	0	0	0	0
0	0.400035	0.325858	0.274107	0	0	0	0	0	0	0
0	0.414008	0.317953	0.26804	0	0	0	0	0	0	0
0	0.414542	0.298245	0.287213	0	0	0	0	0	0	0
0	0.407941	0.291638	0.300421	0	0	0	0	0	0	0
0	0.404118	0.294222	0.30166	0	0	0	0	0	0	0
0	0.393907	0.300119	0.305974	0	0	0	0	0	0	0
0	0.396793	0.291441	0.311767	0	0	0	0	0	0	0
0	0.378369	0.331323	0.290308	0	0	0	0	0	0	0
0	0.387291	0.313548	0.29916	0	0	0	0	0	0	0
0	0.367545	0.314839	0.317616	0	0	0	0	0	0	0
0	0.379444	0.307926	0.31263	0	0	0	0	0	0	0
0	0.382524	0.304696	0.312781	0	0	0	0	0	0	0
0	0.47277	0.238259	0.288971	0	0	0	0	0	0	0
0	0.479307	0.247249	0.273444	0	0	0	0	0	0	0
0	0.471598	0.256676	0.271726	0	0	0	0	0	0	0
0	0.439206	0.282789	0.278005	0	0	0	0	0	0	0
0	0.437715	0.28776	0.274525	0	0	0	0	0	0	0
0	0.433962	0.286968	0.279071	0	0	0	0	0	0	0
0	0.448015	0.279323	0.272661	0	0	0	0	0	0	0
0	0.450814	0.28427	0.264917	0	0	0	0	0	0	0
0	0.445118	0.288071	0.266811	0	0	0	0	0	0	0
0	0.449251	0.268206	0.282542	0	0	0	0	0	0	0
0	0.450798	0.263947	0.285255	0	0	0	0	0	0	0
0	0.437197	0.267976	0.294827	0	0	0	0	0	0	0
0	0.4382	0.274507	0.287293	0	0	0	0	0	0	0
0	0.440815	0.272787	0.286397	0	0	0	0	0	0	0
0	0.439702	0.273679	0.286619	0	0	0	0	0	0	0
0	0.463175	0.253041	0.283783	0	0	0	0	0	0	0
0	0.458324	0.250423	0.291253	0	0	0	0	0	0	0
0	0.450146	0.25061	0.299244	0	0	0	0	0	0	0
0	0.447656	0.251877	0.300467	0	0	0	0	0	0	0
0	0.446399	0.25918	0.294421	0	0	0	0	0	0	0
0	0.451443	0.258509	0.290048	0	0	0	0	0	0	0
0	0.39566	0.238431	0.365909	0	0	0	0	0	0	0
0	0.397053	0.245541	0.357405	0	0	0	0	0	0	0
0	0.457462	0.236281	0.306257	0	0	0	0	0	0	0
0	0.452058	0.226841	0.321101	0	0	0	0	0	0	0
0	0.414262	0.258059	0.327679	0	0	0	0	0	0	0
0	0.414346	0.255139	0.330515	0	0	0	0	0	0	0
0	0.420296	0.25758	0.322124	0	0	0	0	0	0	0
0	0.419979	0.254156	0.325865	0	0	0	0	0	0	0
0	0.42799	0.250941	0.321069	0	0	0	0	0	0	0
0	0.436568	0.249455	0.313977	0	0	0	0	0	0	0
0	0.415588	0.242299	0.342112	0	0	0	0	0	0	0
0	0.435807	0.222666	0.341527	0	0	0	0	0	0	0
0	0.42609	0.226618	0.347292	0	0	0	0	0	0	0
0	0.421929	0.227807	0.350264	0	0	0	0	0	0	0
0	0.351581	0.3647	0.283719	0	0	0	0	0	0	0
0	0.306855	0.389809	0.303336	0	0	0	0	0	0	0
0	0.335	0.291101	0.3739	0	0	0	0	0	0	0
0	0.350624	0.293542	0.355834	0	0	0	0	0	0	0
0	0.349109	0.292669	0.358222	0	0	0	0	0	0	0
0	0.384704	0.282911	0.332385	0	0	0	0	0	0	0
0	0.369482	0.299764	0.330755	0	0	0	0	0	0	0
0	0.355838	0.3107	0.333463	0	0	0	0	0	0	0
0	0.360521	0.301025	0.338454	0	0	0	0	0	0	0
0	0.302113	0.312524	0.385364	0	0	0	0	0	0	0
0	0.316274	0.335276	0.34845	0	0	0	0	0	0	0
0	0.323803	0.320607	0.355591	0	0	0	0	0	0	0
0	0.318018	0.327572	0.35441	0	0	0	0	0	0	0
0	0.311301	0.32303	0.365669	0	0	0	0	0	0	0
0	0.302608	0.334267	0.363125	0	0	0	0	0	0	0
0	0.337204	0.34871	0.314086	0	0	0	0	0	0	0
0	0.323545	0.357035	0.31942	0	0	0	0	0	0	0
0	0.319281	0.364532	0.316188	0	0	0	0	0	0	0
0	0.316253	0.355637	0.32811	0	0	0	0	0	0	0
0	0.321407	0.346436	0.332156	0	0	0	0	0	0	0
0	0.330535	0.333873	0.335591	0	0	0	0	0	0	0
[truncated: 2,069 more rows]

## Sheet: E03_E_upper
upset plot control
Count	Cytosol	ER	Golgi	Lysosome	Mitochondria	Nucleus	Peroxisome	PM	Chromatin	Nucleolus	Ribosome
Total per organelle	1341	527	597	635	674	837	169	1022	436	265	571
472	1	0	0	0	0	0	0	0	0	0	0
445	0	0	0	0	1	0	0	0	0	0	0
415	1	0	0	0	0	1	0	0	0	0	0
270	0	0	0	0	0	0	0	1	0	0	0
193	1	0	0	0	0	0	0	1	0	0	0
174	0	0	0	1	0	0	0	1	0	0	0
149	0	0	0	0	0	0	0	0	1	0	0
119	0	0	1	1	0	0	0	1	0	0	0
92	0	0	0	0	0	1	0	0	1	0	0
86	0	0	0	0	0	1	0	0	0	1	0
81	0	0	1	0	0	0	0	1	0	0	0
74	0	1	0	0	0	0	0	0	0	0	0
56	0	1	0	1	0	0	0	0	0	0	1
55	0	0	0	0	0	0	0	0	0	0	1
55	0	1	1	1	0	0	0	0	0	0	0
54	0	1	0	0	0	0	0	0	0	0	1
47	0	0	0	0	1	0	0	0	0	0	1
47	0	1	1	0	0	0	0	0	0	0	0
42	0	0	0	0	0	0	0	0	0	1	0
39	0	0	1	1	0	0	0	0	0	0	0
36	1	0	0	1	0	0	0	1	0	0	0
36	0	0	0	0	1	0	1	0	0	0	0
36	0	1	0	1	0	0	0	0	0	0	0
35	1	0	0	0	0	1	0	0	1	0	0
35	0	1	0	0	0	0	1	0	0	0	1
33	0	0	0	0	0	1	0	0	0	0	0
33	0	0	0	0	0	1	0	0	1	1	0
24	1	0	0	0	0	1	0	0	0	0	1
23	0	0	0	0	0	0	0	0	1	0	1
21	0	1	1	1	0	0	0	0	0	0	1
20	0	0	0	0	0	1	0	0	0	1	1
19	0	0	0	0	0	0	0	0	0	1	1
18	0	0	1	0	0	0	0	0	0	0	0
17	1	0	0	0	0	1	0	0	0	1	0
16	0	1	0	0	1	0	0	0	0	0	0
16	1	0	0	0	0	0	0	0	0	0	1
16	1	0	0	0	0	1	0	1	0	0	0
16	0	0	0	0	0	0	1	0	0	0	1
15	0	1	0	0	0	0	1	0	0	0	0
15	0	1	1	0	0	0	0	0	0	0	1
14	1	0	1	0	0	0	0	1	0	0	0
14	0	0	0	0	0	1	0	0	0	0	1
14	0	0	1	0	0	0	0	0	1	0	0
14	0	1	0	0	1	0	1	0	0	0	0
13	0	1	1	1	0	0	0	1	0	0	0
13	0	0	0	0	0	1	0	0	1	0	1
13	0	0	0	1	0	0	0	0	0	0	0
13	0	0	0	0	1	0	0	0	1	0	0
13	0	0	1	0	0	0	0	1	0	0	1
12	1	0	1	1	0	0	0	1	0	0	0
12	0	0	1	0	0	0	0	0	0	0	1
12	0	1	1	0	0	0	0	1	0	0	0
11	1	0	0	0	1	0	0	0	0	0	0
10	0	1	1	0	1	0	0	0	0	0	0
10	1	0	0	0	1	1	0	0	0	0	0
9	1	0	0	1	0	0	0	0	0	0	0
8	0	0	0	0	0	0	0	0	1	1	0
7	0	0	0	0	1	0	1	0	0	0	1
7	0	0	1	0	0	0	0	1	1	0	0
7	0	1	0	0	1	0	0	0	0	0	1
7	0	0	1	0	1	0	0	0	0	0	0
7	0	0	1	0	1	0	1	0	0	0	0
6	0	0	0	0	0	1	0	1	0	1	0
6	1	1	0	0	0	0	0	0	0	0	1
6	0	0	0	0	0	0	0	0	1	1	1
6	0	0	0	0	0	0	1	0	1	0	0
6	1	0	1	1	0	0	0	0	0	0	0
6	0	1	0	1	0	0	0	1	0	0	0
6	0	1	0	0	1	0	1	0	0	0	1
5	0	0	0	1	0	0	0	1	0	0	1
5	0	0	0	0	0	0	0	1	0	1	0
5	0	0	1	0	0	0	0	0	0	1	1
5	1	0	0	0	1	0	0	0	0	0	1
5	0	0	0	0	0	0	0	1	1	0	0
5	1	0	0	0	1	1	0	0	0	0	1
5	0	0	1	1	0	0	0	1	0	0	1
4	0	0	0	0	0	0	0	1	0	0	1
4	0	0	0	1	0	0	0	0	0	0	1
4	0	0	0	0	1	0	0	0	1	0	1
4	0	1	1	0	1	0	1	0	0	0	0
3	1	0	1	1	0	0	0	0	0	0	1
3	1	0	0	1	0	0	0	0	0	0	1
3	0	1	1	1	0	0	0	1	0	0	1
3	0	0	1	0	0	0	0	0	1	0	1
3	0	0	1	0	0	0	0	0	0	1	0
3	0	0	1	0	0	1	0	0	1	0	0
3	0	1	1	0	0	0	1	0	0	0	0
3	1	0	1	0	0	0	0	0	0	0	0
3	0	0	0	0	1	0	1	0	1	0	0
2	1	0	0	0	1	1	0	0	1	0	0
2	0	1	1	0	1	0	0	0	0	0	1
2	0	0	1	0	0	0	1	0	0	0	0
2	0	1	0	1	0	0	0	1	0	0	1
2	0	1	1	0	0	0	1	0	0	0	1
2	1	0	0	0	0	1	0	0	0	1	1
2	1	0	0	0	0	0	0	1	0	0	1
2	0	0	1	1	0	0	0	0	0	0	1
2	1	0	1	0	0	1	0	0	0	0	0
2	1	0	0	1	0	0	0	1	0	0	1
2	1	0	1	0	0	0	0	0	0	0	1
2	0	0	1	0	0	0	0	1	1	0	1
2	0	0	0	0	0	0	1	0	0	0	0
2	0	1	1	0	0	0	0	1	0	0	1
2	0	0	1	1	1	0	0	0	0	0	0
2	0	0	1	0	0	0	0	1	0	1	0
2	0	0	1	0	0	0	0	0	1	1	0
2	0	0	1	0	1	0	0	0	1	0	0
2	1	0	0	0	0	0	0	0	1	0	0
1	0	0	1	0	0	0	1	0	1	0	0
1	1	1	0	0	1	0	0	0	0	0	1
1	0	0	0	0	0	0	0	1	0	1	1
1	0	0	1	0	0	1	0	0	0	1	0
1	1	0	0	0	0	0	0	1	1	0	0
1	1	0	1	0	0	1	0	0	0	0	1
1	0	0	0	0	0	0	1	1	0	0	1
1	1	0	0	1	0	1	0	0	0	0	0
1	1	1	1	1	0	0	0	0	0	0	1
1	1	1	0	1	0	0	0	0	0	0	1
1	1	1	1	0	0	0	0	0	0	0	0
1	0	1	0	1	0	0	1	0	0	0	0
1	1	0	0	0	1	0	0	1	0	0	0
1	1	0	0	0	0	1	0	1	0	1	0
1	0	0	0	0	0	1	0	0	1	1	1
1	1	0	0	0	0	0	0	0	0	1	0
1	1	0	0	0	0	0	1	0	1	0	0
1	1	0	0	0	0	0	0	0	1	0	1
1	1	1	0	0	1	0	0	0	0	0	0
1	1	0	0	0	0	0	0	0	0	1	1
1	0	0	0	0	0	0	1	0	0	1	1
1	0	0	1	0	1	0	1	1	1	0	0
1	0	0	1	0	1	0	0	0	0	0	1
1	0	0	1	0	0	1	0	0	0	0	1
1	0	0	1	0	0	0	1	0	0	0	1
1	0	0	1	0	0	1	0	1	0	0	0
1	0	1	0	0	0	0	0	1	0	0	1
1	0	0	1	0	0	0	1	1	0	0	0
1	0	0	0	1	0	0	0	0	1	0	0
1	0	0	1	1	1	0	1	0	0	0	0
1	0	0	1	0	0	0	0	1	0	1	1
1	0	0	1	1	0	0	1	0	0	0	0
1	0	1	0	0	1	0	0	0	1	0	0
1	0	0	0	0	1	0	0	0	0	1	0
1	0	1	0	0	0	0	0	1	0	0	0
1	0	1	1	1	0	0	1	0	0	0	1
1	0	0	0	0	1	1	0	0	0	0	0
1	1	1	1	1	0	0	0	0	0	0	0
1	1	0	0	0	0	1	0	0	1	0	1

## Sheet: E03_E_lower
upset plot LPS treated
Count	Cytosol	ER	Golgi	Lysosome	Mitochondria	Nucleus	Peroxisome	PM	Chromatin	Nucleolus	Ribosome
Total per organelle	1367	578	555	669	728	841	230	1128	500	229	631
445	0	0	0	0	1	0	0	0	0	0	0
395	1	0	0	0	0	0	0	0	0	0	0
356	1	0	0	0	0	1	0	0	0	0	0
291	0	0	0	0	0	0	0	1	0	0	0
255	1	0	0	0	0	0	0	1	0	0	0
228	0	0	0	1	0	0	0	1	0	0	0
188	0	0	0	0	1	0	1	0	0	0	0
126	0	1	1	0	0	0	0	0	0	0	0
121	0	0	0	0	0	0	0	0	1	0	0
116	0	1	0	1	0	0	0	0	0	0	0
106	0	0	0	0	0	0	0	0	0	0	1
100	0	1	0	0	0	0	0	0	0	0	0
88	0	1	1	1	0	0	0	0	0	0	0
82	0	0	0	0	0	1	0	0	0	1	0
81	0	0	1	1	0	0	0	1	0	0	0
74	1	0	0	0	0	1	0	0	1	0	0
59	0	0	1	0	0	0	0	1	0	0	0
55	0	0	0	0	0	1	0	0	1	0	0
52	0	0	0	0	0	0	0	0	1	0	1
50	0	0	0	0	0	1	0	0	0	1	1
42	1	0	0	0	0	1	0	0	0	0	1
37	0	0	0	0	0	1	0	0	0	0	1
37	0	0	0	0	0	1	0	0	1	0	1
35	0	0	0	1	0	0	0	0	0	0	0
34	0	1	0	0	0	0	0	0	0	0	1
31	1	0	0	0	0	0	0	1	0	0	1
31	1	0	0	1	0	0	0	1	0	0	0
30	0	1	1	0	0	0	0	0	0	0	1
29	1	0	0	0	0	1	0	0	1	0	1
29	0	0	0	0	0	0	0	0	0	1	0
22	0	0	1	1	0	0	0	0	0	0	0
22	0	0	0	0	0	1	0	0	1	1	0
19	0	0	0	0	0	1	0	0	0	0	0
18	0	0	1	0	0	0	0	1	0	0	1
17	0	0	0	0	1	0	0	0	1	0	0
16	1	0	0	0	1	0	0	0	0	0	0
15	0	0	0	0	1	0	1	0	1	0	0
15	1	0	1	0	0	0	0	1	0	0	0
15	0	0	0	0	0	0	0	1	0	0	1
15	0	1	1	0	0	0	0	1	0	0	0
14	0	1	0	0	1	0	0	0	0	0	0
13	0	0	0	0	0	0	0	0	0	1	1
12	0	0	1	0	0	0	0	0	0	0	0
9	1	0	1	1	0	0	0	1	0	0	0
9	1	0	0	0	0	0	0	0	0	0	1
9	0	1	0	1	0	0	0	0	0	0	1
9	0	0	0	0	0	0	0	1	1	0	1
9	0	0	1	0	0	0	0	0	0	0	1
8	1	0	0	0	0	1	0	0	0	1	0
8	0	0	1	0	1	0	0	0	0	0	0
7	0	1	1	1	0	0	0	1	0	0	0
7	1	0	0	0	0	0	0	0	1	0	1
7	0	0	1	0	0	0	0	0	1	0	0
6	1	0	0	0	0	0	0	1	1	0	1
6	1	0	0	0	0	0	0	1	1	0	0
6	1	0	0	1	0	0	0	0	0	0	0
6	0	0	0	0	0	1	0	0	1	1	1
6	0	0	0	1	0	0	0	1	0	0	1
5	1	0	0	0	0	1	0	1	0	0	1
5	1	0	1	0	0	0	0	1	0	0	1
5	1	1	0	1	0	0	0	0	0	0	0
5	0	1	1	1	0	0	0	0	0	0	1
4	0	0	1	0	0	0	0	0	1	0	1
4	0	0	0	1	0	0	0	0	0	0	1
4	0	0	0	0	1	0	1	0	0	0	1
4	0	0	0	0	0	0	0	1	0	1	1
4	1	0	0	1	0	0	0	0	0	0	1
4	1	0	0	0	0	0	0	0	1	0	0
4	1	0	0	0	1	1	0	0	0	0	0
4	1	0	0	0	0	1	0	1	0	0	0
3	0	0	0	0	0	0	1	0	1	0	0
3	1	0	0	0	0	1	0	1	1	0	1
3	1	1	1	0	0	0	0	0	0	0	0
3	1	0	0	0	1	0	0	0	1	0	0
3	0	1	0	0	1	0	1	0	0	0	0
3	0	0	0	0	0	0	1	0	0	0	1
3	0	1	0	1	0	0	0	1	0	0	0
3	1	0	0	0	0	1	0	0	0	1	1
3	1	0	1	0	0	0	0	0	0	0	1
3	1	1	1	1	0	0	0	0	0	0	0
2	0	1	1	0	1	0	0	0	0	0	0
2	1	0	1	0	0	0	0	1	1	0	0
2	0	0	0	0	0	0	1	0	1	0	1
2	1	1	0	0	0	0	0	0	0	0	0
2	0	1	1	0	0	0	1	0	0	0	0
2	0	0	0	0	0	0	0	0	1	1	1
2	0	0	0	0	0	0	0	1	1	1	1
2	0	0	0	0	0	1	0	1	1	1	1
2	0	0	1	0	0	0	1	0	0	0	0
2	1	0	1	1	0	0	0	0	0	0	0
2	1	0	1	0	0	0	0	0	0	0	0
2	1	0	1	0	0	0	0	1	1	0	1
2	0	1	0	0	1	0	1	0	0	0	1
2	0	1	0	0	0	0	1	0	0	0	1
2	0	0	0	0	0	0	1	0	0	0	0
2	0	0	1	1	0	0	0	1	0	0	1
1	0	0	1	0	1	0	0	0	1	0	0
1	1	0	1	0	0	0	0	0	1	0	1
1	1	0	0	0	1	0	0	0	1	0	1
1	1	0	1	0	0	0	0	0	1	0	0
1	0	0	0	0	0	0	0	1	0	1	0
1	0	0	0	0	1	0	0	1	0	0	0
1	1	0	0	0	1	1	0	0	1	0	0
1	0	0	1	0	0	0	0	1	1	0	1
1	0	0	0	0	0	1	0	1	0	1	1
1	0	0	0	0	1	0	0	0	0	0	1
1	0	0	1	0	1	0	1	0	1	0	0
1	1	1	0	0	0	0	0	1	0	0	0
1	0	0	0	0	0	0	0	0	1	1	0
1	0	1	1	0	0	0	0	1	0	0	1
1	0	0	1	1	0	0	0	0	0	0	1
1	1	1	1	0	0	0	0	0	0	0	1
1	1	1	0	0	0	0	0	0	0	0	1
1	1	0	0	0	0	0	0	1	0	1	0
1	1	1	1	0	0	0	0	1	0	0	0
1	1	0	0	1	0	0	0	1	0	0	1
1	1	0	0	0	0	1	0	1	0	1	0
1	1	0	0	0	0	0	0	1	0	1	1
1	0	1	0	0	1	0	0	0	0	0	1
1	1	1	0	1	0	0	0	1	0	0	0
1	0	0	1	0	0	0	1	0	0	0	1

## Sheet: E03_F
	Cytosol	ER	Golgi	Lysosome	Mitochondria	Nucleus	Peroxisome	PM	Chromatin	Nucleolus	Ribosome
Cytosol	99.0909	0	0	0	0	0.681818	0	0.227273	0	0	0
ER	0	73.9018	11.3695	14.7287	0	0	0	0	0	0	0
Golgi	0	23.2558	53.4884	16.2791	0	0	4.65116	2.32558	0	0	0
Lysosome	0	0	0.75188	52.2556	0	0	0	46.9925	0	0	0
Mitochondria	0	0	0	0	100	0	0	0	0	0	0
Nucleus	2.85714	0	0	0	0	62.5974	0	0	13.5065	15.5844	5.45455
Peroxisome	0	0	12.5	0	25	0	62.5	0	0	0	0
PM	5.28634	0	0	0.881057	0	0	0	93.8326	0	0	0
Chromatin	0	0	0	0	0	0	0	0	100	0	0
Nucleolus	0	0	0	0	0	0	0	0	0	100	0
Ribosome	0	0	0	0	0	0	0	0	0	0	100
unknown	25	3.28283	8.96465	7.95455	6.06061	9.34343	0.631313	18.1818	10.101	2.77778	7.70202

## Sheet: E03_G
UniProt ID	DS_DistanceScore	P-Value	neg_log10_p	Gene	Significant
A0AVT1	4.03381	0.454554	0.342414	UBA6	FALSE
A0FGR8-2	5.50635	0.902145	0.0447238	A0FGR8-2	FALSE
A0JNW5	11.4939	0.0443034	1.35356	BLTP3B	TRUE
A0MZ66-3	6.87276	0.998798	0.00052242	A0MZ66-3	FALSE
A1L0T0	6.42857	0.291722	0.535031	ILVBL	FALSE
A2RRP1	5.73247	0.499594	0.301383	NBAS	FALSE
A2RUS2	5.18674	0.178813	0.747601	DENND3	FALSE
A2VDJ0-5	3.96006	0.388486	0.410625	A2VDJ0-5	FALSE
A3KMH1	3.92559	0.257358	0.589462	A3KMH1	FALSE
A4D1E9	7.01418	0.101097	0.995263	A4D1E9	FALSE
A4D1P6	7.28978	0.964994	0.0154752	WDR91	FALSE
A5YKK6	5.53737	0.772109	0.112321	CNOT1	FALSE
A6NC98	7.41906	0.814974	0.0888561	CCDC88B	FALSE
A6NDG6	5.61929	0.577526	0.238429	PGP	FALSE
A6NHR9	5.27967	0.975167	0.0109209	SMCHD1	FALSE
A6NJ78	5.58158	0.978063	0.00963311	A6NJ78	FALSE
A8MVS5	5.90525	0.513931	0.289095	A8MVS5	FALSE
A8MXV4	8.5311	0.550122	0.259541	A8MXV4	FALSE
B0I1T2	6.83607	0.447543	0.349165	MYO1G	FALSE
C9JLW8	6.38196	0.715401	0.145451	MCRIP1	FALSE
O00115	7.4371	0.846561	0.0723416	O00115	FALSE
O00116	4.62075	0.999054	0.000410942	AGPS	FALSE
O00142	10.1722	0.322324	0.491708	O00142	FALSE
O00148	6.98806	0.681266	0.166683	DDX39A	FALSE
O00151	7.9772	0.474902	0.323396	PDLIM1	FALSE
O00159-3	6.4228	0.422591	0.37408	O00159-3	FALSE
O00160	7.00071	0.799007	0.0974497	MYO1F	FALSE
O00161	6.99044	0.368256	0.43385	SNAP23	FALSE
O00165-2	6.04971	0.91763	0.0373326	O00165-2	FALSE
O00170	4.29596	0.720924	0.142111	AIP	FALSE
O00178	5.45553	0.325949	0.486851	GTPBP1	FALSE
O00182	5.3964	0.375233	0.425699	LGALS9	FALSE
O00186	9.31379	0.975222	0.0108963	STXBP3	FALSE
O00193	6.19064	0.628293	0.201837	SMAP	FALSE
O00203	6.96881	0.913565	0.0392608	AP3B1	FALSE
O00214-2	6.1612	0.535001	0.271645	O00214-2	FALSE
O00217	6.0002	0.666642	0.176107	O00217	FALSE
O00231-2	5.49763	0.809959	0.091537	O00231-2	FALSE
O00232	5.00296	0.599628	0.222118	PSMD12	FALSE
O00241	9.24142	0.840771	0.0753222	O00241	FALSE
O00264	7.9474	0.299447	0.52368	PGRMC1	FALSE
O00291	5.98789	0.812321	0.0902722	HIP1	FALSE
O00299	4.95256	0.689402	0.161527	CLIC1	FALSE
O00303	4.00562	0.990078	0.00433067	EIF3F	FALSE
O00308	7.16048	0.854045	0.068519	O00308	FALSE
O00329	6.86639	0.794132	0.100107	PIK3CD	FALSE
O00330	7.73478	0.707377	0.150349	PDHX	FALSE
O00391	10.7072	0.591426	0.2281	O00391	FALSE
O00400	4.19595	0.426861	0.369713	O00400	FALSE
O00410-3	4.28544	0.396607	0.40164	O00410-3	FALSE
O00411	9.15563	0.331506	0.479509	O00411	FALSE
O00422	9.03364	0.471393	0.326617	SAP18	FALSE
O00442-2	7.72591	0.602382	0.220128	O00442-2	FALSE
O00443	8.93226	0.796798	0.0986518	O00443	FALSE
O00461	7.99209	0.477299	0.321209	GOLIM4	FALSE
O00468	7.24128	0.822408	0.0849124	O00468	FALSE
O00471	7.7016	0.243781	0.613	EXOC5	FALSE
O00483	8.95913	0.14454	0.840013	NDUFA4	FALSE
O00487	2.90499	0.706645	0.150799	PSMD14	FALSE
O00522	6.59298	0.622191	0.206076	O00522	FALSE
O00541	6.46823	0.775277	0.110543	PES1	FALSE
O00559-2	4.30247	0.142262	0.84691	O00559-2	FALSE
O00566	6.27262	0.761103	0.118557	MPHOSPH10	FALSE
O00567	6.4896	0.801003	0.0963656	NOP56	FALSE
O00571	7.07549	0.845776	0.0727446	DDX3X	FALSE
O00584	8.30914	0.528832	0.276682	RNASET2	FALSE
O00743-3	3.82065	0.646721	0.189283	O00743-3	FALSE
O00748	5.28323	0.912025	0.0399932	O00748	FALSE
O00754	8.33795	0.614041	0.211803	MAN2B1	FALSE
O00764	4.36188	0.762742	0.117622	PDXK	FALSE
O00767	5.65399	0.915267	0.0384524	O00767	FALSE
O14497	7.52929	0.425591	0.371008	ARID1A	FALSE
O14523	7.19108	0.857697	0.0666663	O14523	FALSE
O14545	6.14876	0.708441	0.149696	TRAFD1	FALSE
O14578-4	6.08224	0.94966	0.0224318	O14578-4	FALSE
O14579	3.97309	0.470989	0.326989	COPE	FALSE
O14617-5	4.04988	0.337818	0.471318	O14617-5	FALSE
O14647	5.44651	0.691569	0.160165	CHD2	FALSE
O14653-2	6.17584	0.254392	0.594497	O14653-2	FALSE
O14656	6.9144	0.25828	0.587909	TOR1A	FALSE
O14657	6.37896	0.281156	0.551053	TOR1B	FALSE
O14672	6.74694	0.666761	0.17603	ADAM10	FALSE
O14681	5.00652	0.600523	0.221471	EI24	FALSE
O14683	4.68685	0.527908	0.277442	O14683	FALSE
O14734	4.44572	0.503991	0.297577	O14734	FALSE
O14735	6.78771	0.922072	0.0352351	CDIPT	FALSE
O14737	7.11809	0.557017	0.254131	PDCD5	FALSE
O14744	5.11499	0.572098	0.242529	PRMT5	FALSE
O14745	13.4464	0.830381	0.0807225	NHERF1	FALSE
O14773	9.29439	0.609184	0.215251	TPP1	FALSE
O14776	5.23962	0.746896	0.12674	TCERG1	FALSE
O14777	8.06455	0.965863	0.0150845	NDC80	FALSE
O14818	5.65075	0.583189	0.23419	PSMA7	FALSE
O14841	5.59286	0.533707	0.272697	OPLAH	FALSE
O14874	4.87543	0.728591	0.137516	BCKDK	FALSE
O14879	8.42739	0.878008	0.0565015	IFIT3	FALSE
O14880	4.99684	0.497896	0.302861	MGST3	FALSE
O14910	11.7264	0.664255	0.177665	O14910	FALSE
O14920	11.419	0.0444665	1.35197	IKBKB	TRUE
O14925	7.35838	0.63802	0.195166	O14925	FALSE
O14949	6.78863	0.729332	0.137075	UQCRQ	FALSE
O14950	5.95694	0.674745	0.17086	MYL12B	FALSE
O14964	6.15557	0.96673	0.0146947	HGS	FALSE
O14966	7.01645	0.46631	0.331325	RAB29	FALSE
O14967	5.43812	0.997141	0.00124351	O14967	FALSE
O14972	12.5642	0.822229	0.0850073	VPS26C	FALSE
O14975	6.05753	0.955057	0.0199705	O14975	FALSE
O14976	4.41977	0.943687	0.0251722	GAK	FALSE
O14980	5.56116	0.275329	0.560148	XPO1	FALSE
O14994	6.02783	0.754935	0.12209	O14994	FALSE
O15027-5	7.975	0.939111	0.027283	O15027-5	FALSE
O15031	6.57726	0.956884	0.0191408	PLXNB2	FALSE
O15091	7.30983	0.678181	0.168654	O15091	FALSE
O15118	8.20111	0.980867	0.00838998	NPC1	FALSE
O15120	6.3297	0.702832	0.153148	AGPAT2	FALSE
O15121	6.47225	0.749506	0.125225	DEGS1	FALSE
O15126	8.70122	0.854262	0.0684088	SCAMP1	FALSE
O15127	8.69873	0.942895	0.0255366	SCAMP2	FALSE
O15143	6.65926	0.808579	0.0922776	ARPC1B	FALSE
O15144	6.96314	0.689724	0.161325	ARPC2	FALSE
O15145	10.6526	0.150207	0.82331	ARPC3	FALSE
O15160	4.94271	0.293505	0.532384	O15160	FALSE
O15173-2	9.22501	0.964449	0.0157207	O15173-2	FALSE
O15226-2	6.13945	0.568413	0.245336	O15226-2	FALSE
O15228	5.15116	0.754706	0.122222	GNPAT	FALSE
O15254	4.89122	0.416417	0.380472	ACOX3	FALSE
O15260	5.61412	0.683131	0.165496	SURF4	FALSE
O15269	5.12962	0.657987	0.181783	SPTLC1	FALSE
O15270	6.21218	0.667384	0.175624	SPTLC2	FALSE
O15294	3.1744	0.611272	0.213765	OGT	FALSE
O15321	10.4431	0.190281	0.720605	TM9SF1	FALSE
O15347	6.27888	0.882498	0.0542865	HMGB3	FALSE
O15355	4.44676	0.477224	0.321278	PPM1G	FALSE
O15357	9.19656	0.417969	0.378856	INPPL1	FALSE
O15371	7.01092	0.893283	0.049011	EIF3D	FALSE
O15372	6.07027	0.731184	0.135973	EIF3H	FALSE
O15382	6.47883	0.622174	0.206088	BCAT2	FALSE
O15394	6.24647	0.454846	0.342136	NCAM2	FALSE
O15400	5.54001	0.690999	0.160523	STX7	FALSE
O15427	9.79106	0.0883308	1.05389	SLC16A3	FALSE
O15439	8.01155	0.968141	0.0140615	O15439	FALSE
O15446-2	6.48306	0.772764	0.111953	O15446-2	FALSE
O15479	6.6646	0.769932	0.113548	MAGEB2	FALSE
O15511	8.40701	0.595752	0.224935	ARPC5	FALSE
O15523	7.86255	0.807499	0.0928583	DDX3Y	FALSE
O15533-3	7.2461	0.855803	0.0676263	O15533-3	FALSE
O15553	4.3089	0.594859	0.225586	MEFV	FALSE
O43143	4.94371	0.886492	0.052325	DHX15	FALSE
O43169	6.65126	0.516784	0.286691	CYB5B	FALSE
O43175	5.86298	0.828389	0.0817657	PHGDH	FALSE
O43181	10.6351	0.558218	0.253196	NDUFS4	FALSE
O43237	5.21777	0.893608	0.048853	DYNC1LI2	FALSE
O43242	4.49376	0.95144	0.0216187	PSMD3	FALSE
O43264	8.30838	0.886784	0.0521824	ZW10	FALSE
O43290	9.44784	0.76119	0.118507	SART1	FALSE
O43292	4.33111	0.486309	0.313087	GPAA1	FALSE
O43293	7.24492	0.633207	0.198455	O43293	FALSE
O43314	6.93238	0.783319	0.106062	PPIP5K2	FALSE
O43390	5.11358	0.726974	0.138481	O43390	FALSE
O43395	7.63993	0.460167	0.337084	PRPF3	FALSE
O43396	3.42661	0.54096	0.266835	TXNL1	FALSE
O43399-7	5.19569	0.692015	0.159884	O43399-7	FALSE
O43402	6.09938	0.478288	0.32031	EMC8	FALSE
O43427	7.24277	0.838334	0.0765828	FIBP	FALSE
O43432-3	5.38174	0.564311	0.248481	O43432-3	FALSE
O43447	7.67482	0.11473	0.940321	PPIH	FALSE
O43464	7.13398	0.582913	0.234397	HTRA2	FALSE
O43488	4.29072	0.244438	0.611831	AKR7A2	FALSE
O43491	5.75227	0.312423	0.505257	O43491	FALSE
O43493	9.03049	0.901434	0.0450661	TGOLN2	FALSE
O43504	7.8431	0.564991	0.247958	O43504	FALSE
O43516	7.21745	0.771755	0.11252	O43516	FALSE
O43566	3.72583	0.431058	0.365464	RGS14	FALSE
O43583	4.58798	0.443045	0.353552	DENR	FALSE
O43586	9.18414	0.73308	0.134848	PSTPIP1	FALSE
O43615	7.00852	0.504441	0.29719	TIMM44	FALSE
O43617	8.4267	0.850781	0.0701824	TRAPPC3	FALSE
O43633	11.4165	0.218029	0.661485	CHMP2A	FALSE
O43639	6.4906	0.676626	0.169651	NCK2	FALSE
O43660	3.80412	0.367029	0.4353	PLRG1	FALSE
O43670-4	7.68877	0.831019	0.0803889	O43670-4	FALSE
O43674	8.65814	0.315075	0.501587	NDUFB5	FALSE
O43676	5.27903	0.839171	0.0761496	NDUFB3	FALSE
O43678	7.04533	0.401651	0.396151	NDUFA2	FALSE
O43684-2	4.78664	0.509207	0.293106	O43684-2	FALSE
O43707	5.05008	0.522878	0.2816	ACTN4	FALSE
O43708	4.97461	0.785919	0.104622	O43708	FALSE
O43715	7.56606	0.296819	0.527509	O43715	FALSE
O43716	7.13305	0.393007	0.405599	GATC	FALSE
O43719	2.71497	0.534882	0.271742	HTATSF1	FALSE
O43747	8.6766	0.381214	0.418831	O43747	FALSE
O43760-2	7.62817	0.809827	0.0916079	O43760-2	FALSE
O43768	4.69063	0.620871	0.206999	O43768	FALSE
O43776	3.76582	0.667747	0.175388	NARS1	FALSE
O43809	5.5698	0.779088	0.108414	NUDT21	FALSE
O43813	7.85814	0.952002	0.0213619	LANCL1	FALSE
O43815	10.7768	0.378895	0.421481	STRN	FALSE
O43818	5.68939	0.970612	0.0129543	RRP9	FALSE
O43819	10.8679	0.026318	1.57975	SCO2	TRUE
O43824	3.02376	0.938408	0.0276081	GTPBP6	FALSE
O43837	8.68147	0.642417	0.192183	IDH3B	FALSE
O43847-2	5.25519	0.648431	0.188136	O43847-2	FALSE
O43852-3	3.81667	0.339091	0.469684	O43852-3	FALSE
O43861	7.37867	0.508109	0.294044	O43861	FALSE
O43865	6.40311	0.572005	0.2426	AHCYL1	FALSE
O43914	6.06778	0.60299	0.21969	TYROBP	FALSE
O43920	8.68053	0.589309	0.229657	O43920	FALSE
O60216	7.15072	0.720939	0.142101	RAD21	FALSE
O60220	4.52769	0.4814	0.317494	TIMM8A	FALSE
O60234	3.85562	0.263168	0.579766	GMFG	FALSE
O60262	5.12701	0.865894	0.0625352	GNG7	FALSE
O60264	6.45849	0.815864	0.0883824	SMARCA5	FALSE
O60271	5.23334	0.643832	0.191227	SPAG9	FALSE
O60306	4.29345	0.66391	0.177891	AQR	FALSE
O60313-2	7.15836	0.56456	0.24829	O60313-2	FALSE
O60315	8.33	0.984697	0.00669728	ZEB2	FALSE
O60331-3	7.71794	0.873251	0.0588609	O60331-3	FALSE
O60337	5.15618	0.670168	0.173816	O60337	FALSE
O60341	8.60301	0.596689	0.224252	KDM1A	FALSE
O60353	5.92674	0.691721	0.160069	O60353	FALSE
O60427	8.63807	0.818805	0.0868193	FADS1	FALSE
O60476	6.78407	0.717538	0.144155	MAN1A2	FALSE
O60488	8.25829	0.885362	0.0528792	ACSL4	FALSE
O60493	11.5024	0.0220143	1.6573	SNX3	TRUE
O60496	10.2511	0.124262	0.905663	DOK2	FALSE
O60503	8.41007	0.499089	0.301822	O60503	FALSE
O60504	7.95463	0.313603	0.50362	SORBS3	FALSE
O60524	6.19321	0.82026	0.0860482	NEMF	FALSE
O60568	7.51255	0.995361	0.00201936	PLOD3	FALSE
O60573	7.57347	0.471459	0.326556	EIF4E2	FALSE
O60603	12.298	0.368348	0.433741	TLR2	FALSE
O60610	5.55497	0.646547	0.1894	DIAPH1	FALSE
O60613	8.1918	0.88869	0.0512497	SELENOF	FALSE
O60645-3	10.8818	0.129396	0.88808	O60645-3	FALSE
O60664	4.56297	0.522879	0.281599	O60664	FALSE
O60669	5.36062	0.596736	0.224218	O60669	FALSE
O60701	3.93233	0.872296	0.0593363	UGDH	FALSE
O60704	7.68664	0.772649	0.112018	O60704	FALSE
O60762	4.05516	0.298024	0.525749	DPM1	FALSE
O60763	4.05693	0.556883	0.254236	O60763	FALSE
O60783	6.73731	0.863262	0.0638576	O60783	FALSE
O60784-2	6.55068	0.965423	0.0152824	O60784-2	FALSE
O60826	12.349	0.150979	0.821084	CCDC22	FALSE
O60830-2	6.43726	0.669007	0.17457	O60830-2	FALSE
O60832	6.08517	0.692566	0.159539	DKC1	FALSE
O60841	4.08489	0.76413	0.116833	EIF5B	FALSE
O60858-3	6.48981	0.740536	0.130454	O60858-3	FALSE
O60861	7.62493	0.601102	0.221052	O60861	FALSE
O60869	5.43244	0.631315	0.199754	EDF1	FALSE
O60879-2	6.31732	0.718778	0.143405	O60879-2	FALSE
O60884	7.44469	0.894344	0.0484954	DNAJA2	FALSE
O60885	7.98687	0.941886	0.0260016	BRD4	FALSE
O60925	6.83438	0.653942	0.184461	PFDN1	FALSE
O60934	4.38328	0.452032	0.344831	NBN	FALSE
O60942	8.15333	0.99145	0.00372932	RNGTT	FALSE
O75027-2	6.02313	0.682285	0.166034	O75027-2	FALSE
O75044	9.07607	0.567668	0.245906	SRGAP2	FALSE
O75052	6.14584	0.821296	0.0855005	O75052	FALSE
O75063	6.34607	0.950144	0.0222104	FAM20B	FALSE
O75064	9.03057	0.394397	0.404067	DENND4B	FALSE
O75071	6.00067	0.663116	0.178411	O75071	FALSE
O75083	3.25246	0.487848	0.311715	WDR1	FALSE
O75116	11.0351	0.845643	0.0728131	ROCK2	FALSE
O75127	8.10605	0.97223	0.012231	O75127	FALSE
O75131	4.41446	0.493727	0.306513	CPNE3	FALSE
O75144-2	5.63893	0.272807	0.564144	O75144-2	FALSE
O75150	8.01531	0.327534	0.484743	RNF40	FALSE
O75152	5.23023	0.246857	0.607554	ZC3H11A	FALSE
O75153	6.00924	0.558663	0.25285	CLUH	FALSE
O75164	5.1204	0.568922	0.244948	KDM4A	FALSE
O75165	10.5931	0.459985	0.337256	DNAJC13	FALSE
O75175	5.01885	0.599363	0.22231	CNOT3	FALSE
O75208	8.91903	0.600255	0.221664	O75208	FALSE
O75251	9.91087	0.0301353	1.52092	NDUFS7	TRUE
O75298	6.75229	0.858299	0.0663614	O75298	FALSE
O75306	7.85215	0.716395	0.144848	NDUFS2	FALSE
O75323	6.36745	0.362379	0.440836	NIPSNAP2	FALSE
O75330-3	4.77561	0.52743	0.277835	O75330-3	FALSE
O75347	5.43676	0.553267	0.257066	TBCA	FALSE
O75348	6.12442	0.758503	0.120043	ATP6V1G1	FALSE
O75351	7.17204	0.974698	0.0111298	VPS4B	FALSE
O75367	6.44552	0.763772	0.117036	MACROH2A1	FALSE
O75368	4.82088	0.649037	0.187731	SH3BGRL	FALSE
O75369-8	5.35616	0.703728	0.152595	O75369-8	FALSE
O75379	5.19797	0.389961	0.408979	O75379	FALSE
O75380	5.5079	0.589225	0.229719	NDUFS6	FALSE
O75381	4.45549	0.34759	0.458933	PEX14	FALSE
O75390	6.86845	0.559393	0.252283	CS	FALSE
O75394	7.42077	0.582148	0.234967	O75394	FALSE
O75396	5.89704	0.599589	0.222146	SEC22B	FALSE
O75400	3.78491	0.361819	0.441508	PRPF40A	FALSE
O75410-2	5.89251	0.788934	0.10296	O75410-2	FALSE
O75427	6.07362	0.596337	0.224508	LRCH4	FALSE
O75436	5.11282	0.464909	0.332632	VPS26A	FALSE
O75439	7.19745	0.717203	0.144358	PMPCB	FALSE
O75475	6.48311	0.947778	0.0232933	PSIP1	FALSE
O75477	4.4185	0.528768	0.276735	ERLIN1	FALSE
O75489	9.41588	0.489448	0.310293	NDUFS3	FALSE
O75521	5.5091	0.94447	0.0248117	O75521	FALSE
O75531	9.88979	0.77338	0.111607	BANF1	FALSE
O75533	3.5832	0.930913	0.0310911	SF3B1	FALSE
O75534-4	4.78726	0.247102	0.607125	O75534-4	FALSE
O75608	4.25187	0.565367	0.247669	LYPLA1	FALSE
O75616	4.35698	0.395517	0.402834	ERAL1	FALSE
O75643	3.4687	0.328252	0.483792	SNRNP200	FALSE
O75689	3.52618	0.199955	0.699069	ADAP1	FALSE
O75694	5.16881	0.796262	0.0989438	NUP155	FALSE
O75695	5.84001	0.769976	0.113523	RP2	FALSE
O75718	6.94269	0.447052	0.349642	CRTAP	FALSE
O75746	5.4335	0.815011	0.0888368	SLC25A12	FALSE
O75781	9.22332	0.608667	0.21562	PALM	FALSE
O75787	6.38516	0.611103	0.213886	ATP6AP2	FALSE
O75821	6.23496	0.99004	0.00434739	EIF3G	FALSE
O75822	6.13684	0.497414	0.303282	EIF3J	FALSE
O75832	4.45189	0.554599	0.256021	PSMD10	FALSE
O75843	7.46815	0.854477	0.0682998	AP1G2	FALSE
O75844	5.38306	0.430107	0.366424	ZMPSTE24	FALSE
O75845	6.0711	0.704238	0.15228	O75845	FALSE
O75874	5.68881	0.505254	0.29649	IDH1	FALSE
O75879	8.3686	0.918184	0.0370702	GATB	FALSE
O75880	5.20153	0.727611	0.138101	O75880	FALSE
O75882	6.07284	0.872353	0.0593079	O75882	FALSE
O75915	4.63409	0.84292	0.0742137	ARL6IP5	FALSE
O75934	6.81243	0.995446	0.0019825	BCAS2	FALSE
O75937	7.27122	0.547001	0.262012	DNAJC8	FALSE
O75940	6.16072	0.759336	0.119566	SMNDC1	FALSE
O75947	9.52321	0.0515655	1.28764	ATP5PD	FALSE
O75955	5.68749	0.708976	0.149368	FLOT1	FALSE
O75964	11.7175	0.000953374	3.02074	ATP5MG	TRUE
O75976	4.88987	0.402472	0.395264	CPD	FALSE
O76021	4.69469	0.400353	0.397556	RSL1D1	FALSE
O76031	8.33277	0.306582	0.513453	CLPX	FALSE
O76071	5.47438	0.442671	0.353919	CIAO1	FALSE
O76094	9.34856	0.805538	0.0939139	SRP72	FALSE
O94759	6.71821	0.936262	0.0286024	TRPM2	FALSE
O94766	5.77422	0.997398	0.00113151	B3GAT3	FALSE
O94776	7.80043	0.631994	0.199287	MTA2	FALSE
O94804	6.83853	0.423745	0.372896	STK10	FALSE
O94819	5.873	0.757775	0.120459	KBTBD11	FALSE
O94826	8.01409	0.26831	0.571362	TOMM70	FALSE
O94851-4	6.26358	0.46684	0.330832	O94851-4	FALSE
O94855-2	5.77565	0.324549	0.48872	O94855-2	FALSE
O94874	4.22662	0.437304	0.359217	UFL1	FALSE
O94885	6.20495	0.677969	0.16879	SASH1	FALSE
O94886	5.55701	0.589325	0.229645	O94886	FALSE
O94903	7.05635	0.803123	0.095218	PLPBP	FALSE
O94905	6.61847	0.501926	0.29936	ERLIN2	FALSE
O94906	4.21711	0.600899	0.221199	PRPF6	FALSE
O94915	6.26122	0.385793	0.413646	FRYL	FALSE
O94919	7.90961	0.754243	0.122489	O94919	FALSE
O94925-3	8.20427	0.357428	0.446811	O94925-3	FALSE
O94966-5	3.9847	0.201779	0.695123	O94966-5	FALSE
O95104	8.79175	0.9317	0.0307241	SCAF4	FALSE
O95139	3.23583	0.235526	0.627961	O95139	FALSE
O95140	5.51117	0.421843	0.37485	MFN2	FALSE
O95159	7.3246	0.566058	0.247139	ZFPL1	FALSE
O95163	3.49242	0.363622	0.43935	ELP1	FALSE
O95168	6.08046	0.68346	0.165287	NDUFB4	FALSE
O95169	7.77371	0.633209	0.198453	NDUFB8	FALSE
O95182	8.29425	0.0883999	1.05355	NDUFA7	FALSE
O95202	7.8397	0.466362	0.331277	LETM1	FALSE
O95210	7.45569	0.726947	0.138497	O95210	FALSE
O95232	5.47957	0.76768	0.11482	LUC7L3	FALSE
O95239	4.05781	0.99438	0.00244757	KIF4A	FALSE
O95248-4	8.16638	0.32285	0.490999	O95248-4	FALSE
O95249	10.7447	0.208506	0.680881	GOSR1	FALSE
O95292	7.53334	0.146592	0.833889	VAPB	FALSE
O95298	4.37539	0.23935	0.620967	NDUFC2	FALSE
O95299	6.97283	0.583183	0.234195	NDUFA10	FALSE
O95336	5.89341	0.589134	0.229786	PGLS	FALSE
O95347	5.6128	0.592841	0.227062	SMC2	FALSE
O95372	4.23356	0.455458	0.341552	LYPLA2	FALSE
O95373	3.63113	0.475084	0.32323	IPO7	FALSE
O95400	4.32412	0.985803	0.00621004	CD2BP2	FALSE
O95433	3.05455	0.534012	0.272449	AHSA1	FALSE
O95450	7.91305	0.721357	0.14185	O95450	FALSE
O95477	5.71379	0.506031	0.295823	ABCA1	FALSE
O95479	8.11004	0.921914	0.0353098	H6PD	FALSE
O95486	7.25659	0.732039	0.135466	SEC24A	FALSE
O95487-3	12.0513	0.124313	0.905484	O95487-3	FALSE
O95571	9.41204	0.0918961	1.0367	ETHE1	FALSE
O95573	5.84376	0.836291	0.0776427	ACSL3	FALSE
O95602	5.6668	0.48572	0.313614	POLR1A	FALSE
O95613	5.87214	0.728158	0.137775	PCNT	FALSE
O95714	9.44604	0.605256	0.218061	O95714	FALSE
O95716	7.56531	0.912888	0.0395827	O95716	FALSE
O95721	7.27003	0.407211	0.390181	SNAP29	FALSE
O95747	7.2609	0.618692	0.208525	OXSR1	FALSE
O95757	3.54578	0.355872	0.448706	HSPA4L	FALSE
O95758-4	7.06695	0.722552	0.141131	O95758-4	FALSE
O95782	8.59905	0.87962	0.0557048	AP2A1	FALSE
O95793	7.41919	0.663592	0.178099	O95793	FALSE
O95816	11.2454	0.0859534	1.06574	BAG2	FALSE
O95817	6.27473	0.578344	0.237813	BAG3	FALSE
O95819-3	6.95457	0.505909	0.295928	O95819-3	FALSE
O95822	7.33604	0.991368	0.0037649	MLYCD	FALSE
O95825	6.39049	0.521156	0.283032	CRYZL1	FALSE
O95831	7.91776	0.809535	0.0917644	AIFM1	FALSE
O95861	4.00149	0.600749	0.221307	BPNT1	FALSE
O95864	6.1449	0.406357	0.391092	FADS2	FALSE
O95865	6.59599	0.635287	0.19703	DDAH2	FALSE
O95870	6.63521	0.657818	0.181894	ABHD16A	FALSE
O95881	5.71821	0.690738	0.160687	TXNDC12	FALSE
O95900	5.24735	0.65177	0.185905	O95900	FALSE
O95980	7.5109	0.346326	0.460515	O95980	FALSE
O96000	5.3435	0.944433	0.0248287	NDUFB10	FALSE
O96005	6.00712	0.955873	0.0195996	CLPTM1	FALSE
O96008	5.93898	0.895458	0.0479549	TOMM40	FALSE
O96011	3.86267	0.4453	0.351347	PEX11B	FALSE
O96013	6.29406	0.221381	0.654859	O96013	FALSE
O96019	8.98918	0.928889	0.032036	ACTL6A	FALSE
P00167	6.46008	0.847068	0.0720817	CYB5A	FALSE
P00338-3	3.39896	0.65969	0.18066	P00338-3	FALSE
P00367	6.90752	0.590973	0.228432	GLUD1	FALSE
P00387-3	5.49684	0.971453	0.0125783	P00387-3	FALSE
P00441	7.83787	0.792407	0.101052	SOD1	FALSE
P00491	5.94542	0.603363	0.219421	PNP	FALSE
P00492	4.81989	0.632371	0.199028	HPRT1	FALSE
P00505	9.31007	0.174515	0.758168	GOT2	FALSE
P00519-2	7.98036	0.648721	0.187942	P00519-2	FALSE
P00558	4.38711	0.646662	0.189323	PGK1	FALSE
P00746	7.99069	0.450672	0.346139	P00746	FALSE
P00747	5.55825	0.414991	0.381961	P00747	FALSE
P00749	6.58257	0.603003	0.21968	P00749	FALSE
P00846	7.55809	0.994413	0.00243322	P00846	FALSE
P00918	5.08826	0.582067	0.235027	CA2	FALSE
P00966	3.80564	0.641789	0.192608	ASS1	FALSE
P00973	5.89592	0.250034	0.602	OAS1	FALSE
P01034	10.5385	0.326343	0.486326	CST3	FALSE
P01111	7.58328	0.58522	0.232681	NRAS	FALSE
P01112	6.07808	0.926153	0.0333171	P01112	FALSE
P01130	6.81712	0.866962	0.0619999	LDLR	FALSE
P01137	8.15021	0.683165	0.165474	TGFB1	FALSE
P01892	7.00729	0.516004	0.287347	HLA-A	FALSE
P02042	3.9977	0.423144	0.373511	P02042	FALSE
P02545	5.59128	0.650392	0.186825	LMNA	FALSE
P02649	8.61254	0.915582	0.0383029	APOE	FALSE
P02655	7.06313	0.706652	0.150794	P02655	FALSE
P02686	6.04559	0.553115	0.257185	MBP	FALSE
P02765	5.19056	0.482663	0.316356	AHSG	FALSE
P02786	7.97707	0.713994	0.146305	TFRC	FALSE
P02792	8.06412	0.542679	0.265457	FTL	FALSE
P02794	9.47467	0.691863	0.15998	P02794	FALSE
P04035-3	4.59509	0.835271	0.0781725	P04035-3	FALSE
P04040	6.97826	0.791257	0.101682	CAT	FALSE
P04062	7.21579	0.849544	0.0708141	GBA1	FALSE
P04075	6.09803	0.443268	0.353334	ALDOA	FALSE
P04080	4.99411	0.562627	0.249779	CSTB	FALSE
P04083	5.82859	0.596049	0.224718	ANXA1	FALSE
P04179	8.15676	0.692808	0.159387	SOD2	FALSE
P04181	8.26067	0.373286	0.427958	OAT	FALSE
P04183	4.77511	0.331291	0.47979	TK1	FALSE
P04406	11.855	0.578553	0.237657	GAPDH	FALSE
P04632	6.17618	0.446717	0.349967	CAPNS1	FALSE
P04792	6.20347	0.778449	0.10877	HSPB1	FALSE
P04818	5.17063	0.482607	0.316406	TYMS	FALSE
P04839	10.0218	0.414055	0.382942	CYBB	FALSE
P04843	7.58619	0.552872	0.257375	RPN1	FALSE
P04899-3	6.18011	0.49046	0.309396	P04899-3	FALSE
P04920	5.83591	0.493778	0.306468	SLC4A2	FALSE
P04921	5.59817	0.347546	0.458988	P04921	FALSE
P05023	5.55853	0.445474	0.351177	ATP1A1	FALSE
P05067	7.14494	0.661306	0.179597	APP	FALSE
P05091	8.11348	0.412436	0.384643	ALDH2	FALSE
P05107	7.80837	0.710392	0.148502	ITGB2	FALSE
P05114	7.11283	0.913953	0.0390764	HMGN1	FALSE
P05141	7.22503	0.269724	0.569081	SLC25A5	FALSE
P05161	8.08648	0.574413	0.240776	ISG15	FALSE
P05165	9.08677	0.826801	0.0825992	PCCA	FALSE
P05166-2	6.11394	0.886827	0.0521609	P05166-2	FALSE
P05198	5.23639	0.85848	0.06627	EIF2S1	FALSE
P05204	4.70747	0.630914	0.20003	HMGN2	FALSE
P05362	6.0862	0.398967	0.399063	ICAM1	FALSE
P05387	10.6317	0.00937167	2.02818	RPLP2	TRUE
P05388	5.12754	0.288275	0.540193	RPLP0	FALSE
P05455	3.24196	0.892822	0.0492349	SSB	FALSE
P05556	8.46058	0.328635	0.483286	ITGB1	FALSE
P05771-2	7.00925	0.894699	0.048323	P05771-2	FALSE
P06280	6.1125	0.785424	0.104896	GLA	FALSE
P06396	7.27682	0.658323	0.181561	P06396	FALSE
P06400	7.19167	0.952109	0.0213132	RB1	FALSE
P06454	4.34047	0.663846	0.177933	PTMA	FALSE
P06493	4.86955	0.855823	0.067616	CDK1	FALSE
P06576	8.03095	0.370438	0.431285	ATP5F1B	FALSE
P06702	6.34858	0.527286	0.277954	S100A9	FALSE
P06733	6.11299	0.633486	0.198263	ENO1	FALSE
P06737	6.6665	0.614677	0.211353	PYGL	FALSE
P06744	4.84333	0.500433	0.300654	GPI	FALSE
P06753	4.9107	0.638501	0.194839	TPM3	FALSE
P06753-2	4.23856	0.5767	0.23905	P06753-2	FALSE
P06756	8.85276	0.902247	0.0446745	P06756	FALSE
P06865	8.76181	0.797123	0.0984744	HEXA	FALSE
P07099	5.45925	0.708245	0.149817	EPHX1	FALSE
P07195	3.30583	0.424471	0.372152	LDHB	FALSE
P07203	6.04976	0.979497	0.00899688	GPX1	FALSE
P07204	6.76068	0.567823	0.245787	THBD	FALSE
P07225	7.61182	0.469782	0.328103	PROS1	FALSE
P07237	10.6911	0.0975563	1.01074	P4HB	FALSE
P07305	6.77047	0.838554	0.076469	H1-0	FALSE
P07332	5.55031	0.523136	0.281385	FES	FALSE
P07333	5.19214	0.601421	0.220821	P07333	FALSE
P07339	9.32933	0.352501	0.452839	CTSD	FALSE
P07355-2	7.84536	0.610066	0.214623	P07355-2	FALSE
P07384	4.54964	0.478033	0.320542	CAPN1	FALSE
P07437	4.13435	0.462302	0.335075	TUBB	FALSE
P07602-3	11.2005	0.100231	0.998998	P07602-3	FALSE
P07686	10.6838	0.0891566	1.04985	HEXB	FALSE
P07711	7.71386	0.821433	0.085428	CTSL	FALSE
P07737	4.62376	0.662409	0.178874	PFN1	FALSE
P07741	3.73945	0.498052	0.302725	APRT	FALSE
P07814	4.09428	0.375374	0.425535	EPRS1	FALSE
P07858	5.91814	0.365214	0.437453	CTSB	FALSE
P07900-2	4.61712	0.554886	0.255796	P07900-2	FALSE
P07902	4.96614	0.586813	0.2315	GALT	FALSE
P07910-2	8.24428	0.900085	0.0457163	P07910-2	FALSE
P07919	6.94704	0.572655	0.242107	UQCRH	FALSE
P07947	7.2201	0.408811	0.388477	YES1	FALSE
P07996	8.72974	0.584984	0.232856	P07996	FALSE
P08133	6.85504	0.548831	0.260561	ANXA6	FALSE
P08134	9.79534	0.613184	0.212409	RHOC	FALSE
P08174-2	5.87379	0.505359	0.2964	P08174-2	FALSE
P08195-2	5.91962	0.777137	0.109503	P08195-2	FALSE
P08236	9.83808	0.921031	0.0357259	P08236	FALSE
P08238	4.95834	0.835182	0.0782191	HSP90AB1	FALSE
P08240	5.65934	0.408217	0.389109	SRPRA	FALSE
P08243	3.40971	0.291034	0.536056	ASNS	FALSE
P08246	6.78748	0.499452	0.301506	ELANE	FALSE
P08311	12.9516	0.278526	0.555135	CTSG	FALSE
P08397	5.82716	0.563577	0.249047	HMBS	FALSE
P08559	7.92854	0.237012	0.62523	P08559	FALSE
P08567	8.4958	0.651145	0.186322	PLEK	FALSE
P08571	6.23177	0.514628	0.288506	CD14	FALSE
P08574	6.1348	0.979649	0.00892932	CYC1	FALSE
P08575	7.34952	0.643929	0.191162	PTPRC	FALSE
P08579	5.43171	0.98302	0.00743747	SNRPB2	FALSE
P08582	5.49908	0.343461	0.464123	P08582	FALSE
P08621	5.14913	0.511058	0.291529	SNRNP70	FALSE
P08631	4.74084	0.742752	0.129156	HCK	FALSE
P08648	7.06748	0.300979	0.521464	ITGA5	FALSE
P08670	11.8206	0.216571	0.6644	VIM	FALSE
P08708	6.02703	0.554468	0.256124	RPS17	FALSE
P08754	7.07277	0.656982	0.182446	GNAI3	FALSE
P08758	3.49698	0.630874	0.200057	ANXA5	FALSE
P08865	3.66456	0.33368	0.47667	RPSA	FALSE
P08887	4.5525	0.537797	0.269382	P08887	FALSE
P08962	9.27712	0.760522	0.118888	CD63	FALSE
P09001	7.35162	0.278857	0.554618	MRPL3	FALSE
P09012	8.08605	0.80839	0.0923788	SNRPA	FALSE
P09110	4.3741	0.304451	0.516483	ACAA1	FALSE
P09132	10.4671	0.0695783	1.15753	SRP19	FALSE
P09211	4.35576	0.537179	0.269881	GSTP1	FALSE
P09382	3.57722	0.849837	0.0706644	LGALS1	FALSE
P09417	6.01902	0.252005	0.598591	QDPR	FALSE
P09429	5.68758	0.792302	0.10111	HMGB1	FALSE
P09496-2	6.471	0.89095	0.0501468	P09496-2	FALSE
P09497-2	6.13543	0.722804	0.14098	P09497-2	FALSE
P09525	15.6298	0.00268049	2.57179	ANXA4	TRUE
P09601	6.36617	0.518984	0.284846	HMOX1	FALSE
P09622	6.98566	0.617654	0.209255	DLD	FALSE
P09661	3.33365	0.604532	0.218581	SNRPA1	FALSE
P09669	5.04378	0.717602	0.144116	P09669	FALSE
P09769	6.24466	0.484859	0.314385	P09769	FALSE
P09874	6.36407	0.857316	0.066859	PARP1	FALSE
P09958	7.51469	0.822966	0.084618	P09958	FALSE
P09972	5.85232	0.663739	0.178002	ALDOC	FALSE
P0C0S5	10.1637	0.287261	0.541724	H2AZ1	FALSE
P0C7P0	4.57083	0.731811	0.135601	CISD3	FALSE
P0CG12	5.32079	0.404303	0.393293	DERPC	FALSE
P0DMV9	4.89669	0.90036	0.0455838	HSPA1B	FALSE
P10109	5.67747	0.697232	0.156623	FDX1	FALSE
P10124	3.77416	0.438103	0.358423	SRGN	FALSE
P10153	9.20066	0.512958	0.289918	RNASE2	FALSE
P10253	8.94485	0.946131	0.0240488	GAA	FALSE
P10301	6.17132	0.587896	0.2307	P10301	FALSE
P10398	5.2727	0.542912	0.265271	ARAF	FALSE
P10412	5.11566	0.620388	0.207336	H1-4	FALSE
P10415	9.60397	0.00571018	2.24335	P10415	TRUE
P10515	9.87798	0.248012	0.605528	DLAT	FALSE
P10586	6.88886	0.33669	0.472769	PTPRF	FALSE
P10599	3.70951	0.410507	0.38668	TXN	FALSE
P10606	7.04182	0.3271	0.485319	COX5B	FALSE
P10619	9.36211	0.468035	0.329722	CTSA	FALSE
P10620	7.53459	0.540652	0.267082	MGST1	FALSE
P10644	7.52948	0.700812	0.154399	PRKAR1A	FALSE
P10768	4.74997	0.688977	0.161795	ESD	FALSE
P10809	9.03921	0.406228	0.39123	HSPD1	FALSE
P11021	6.87705	0.779221	0.108339	HSPA5	FALSE
P11047	5.08735	0.959292	0.0180492	LAMC1	FALSE
P11049	7.78068	0.850972	0.0700849	CD37	FALSE
P11117	10.2478	0.550576	0.259183	P11117	FALSE
P11142	6.83428	0.712697	0.147095	HSPA8	FALSE
P11166	5.12851	0.418074	0.378747	SLC2A1	FALSE
P11171	6.10255	0.780162	0.107815	EPB41	FALSE
P11172	4.29364	0.641148	0.193041	UMPS	FALSE
P11177	8.79058	0.165067	0.78234	PDHB	FALSE
P11182	9.02495	0.571353	0.243096	DBT	FALSE
P11215-2	6.88973	0.578187	0.237932	P11215-2	FALSE
P11233	6.21189	0.683119	0.165503	RALA	FALSE
P11234-2	6.45484	0.757376	0.120688	P11234-2	FALSE
P11274	6.35217	0.45531	0.341693	P11274	FALSE
P11279	8.57178	0.907407	0.0421979	LAMP1	FALSE
P11310-2	8.75291	0.258769	0.587089	P11310-2	FALSE
P11387	6.68715	0.508232	0.293938	TOP1	FALSE
P11388-4	5.83548	0.704038	0.152404	P11388-4	FALSE
P11413-2	4.4893	0.612583	0.212835	P11413-2	FALSE
P11498	3.78312	0.632921	0.19865	PC	FALSE
P11586	5.43664	0.968346	0.0139692	MTHFD1	FALSE
P11717	8.46363	0.597249	0.223845	IGF2R	FALSE
P11940	6.75306	0.854351	0.0683638	PABPC1	FALSE
P12004	7.74967	0.213189	0.671235	PCNA	FALSE
P12081	4.98196	0.558362	0.253084	HARS1	FALSE
P12109	9.53916	0.527105	0.278103	COL6A1	FALSE
P12236	7.64997	0.439965	0.356582	SLC25A6	FALSE
P12268	4.51653	0.658952	0.181146	IMPDH2	FALSE
P12270	3.68885	0.611339	0.213718	TPR	FALSE
P12314	7.41068	0.426378	0.370205	FCGR1A	FALSE
P12318	5.59652	0.544171	0.264265	FCGR2A	FALSE
P12694	7.4103	0.576221	0.239411	BCKDHA	FALSE
P12814	5.62742	0.714035	0.146281	ACTN1	FALSE
P12931-2	5.24277	0.738308	0.131762	P12931-2	FALSE
P12956	5.24961	0.434172	0.362338	XRCC6	FALSE
P13010	5.98773	0.369189	0.432751	XRCC5	FALSE
P13073	8.15175	0.277459	0.556801	COX4I1	FALSE
P13196	4.91776	0.960914	0.0173153	P13196	FALSE
P13284	8.62429	0.60168	0.220635	P13284	FALSE
P13489	6.1531	0.841358	0.0750191	RNH1	FALSE
P13498	5.87461	0.588607	0.230174	P13498	FALSE
P13501	8.12168	0.877139	0.0569316	CCL5	FALSE
P13612	7.00301	0.447935	0.348785	ITGA4	FALSE
P13639	6.45416	0.750669	0.124552	EEF2	FALSE
P13667	8.09236	0.610905	0.214027	PDIA4	FALSE
P13674	8.15343	0.608393	0.215816	P13674	FALSE
P13674-2	9.01803	0.796171	0.0989935	P13674-2	FALSE
P13693	6.6986	0.884578	0.053264	TPT1	FALSE
P13747	5.26523	0.872022	0.0594725	P13747	FALSE
P13796	4.73634	0.620036	0.207583	LCP1	FALSE
P13798	5.69038	0.337594	0.471605	APEH	FALSE
P13804	12.4431	0.00896038	2.04767	ETFA	TRUE
P13807	4.45604	0.561018	0.251023	GYS1	FALSE
P13861	6.25139	0.531849	0.274211	PRKAR2A	FALSE
P13987	9.19442	0.494586	0.305758	CD59	FALSE
P13995	8.41077	0.102412	0.989651	MTHFD2	FALSE
P14174	4.07981	0.418009	0.378814	MIF	FALSE
P14209	5.55203	0.637844	0.195286	CD99	FALSE
P14314	9.81779	0.946744	0.0237675	PRKCSH	FALSE
P14317	4.07462	0.412502	0.384574	HCLS1	FALSE
P14324	4.85227	0.482366	0.316623	FDPS	FALSE
P14384	6.24922	0.686771	0.163188	CPM	FALSE
P14543	6.5814	0.691704	0.16008	P14543	FALSE
P14550	4.35832	0.716118	0.145016	AKR1A1	FALSE
P14618	4.92821	0.368735	0.433286	PKM	FALSE
P14625	6.40246	0.830882	0.0804609	HSP90B1	FALSE
P14678-3	4.60745	0.951194	0.0217308	P14678-3	FALSE
P14735	6.02532	0.716299	0.144906	IDE	FALSE
P14854	4.60153	0.614129	0.21174	COX6B1	FALSE
P14866	7.24698	0.739889	0.130833	HNRNPL	FALSE
P14868	4.48215	0.476522	0.321917	DARS1	FALSE
P14923	9.62938	0.97629	0.0104213	P14923	FALSE
P14927	8.32035	0.228365	0.641371	UQCRB	FALSE
P15121	4.8653	0.427433	0.369132	AKR1B1	FALSE
P15144	7.39266	0.556979	0.254161	ANPEP	FALSE
P15151	13.2699	0.730332	0.136479	PVR	FALSE
P15153	6.81401	0.994517	0.00238785	RAC2	FALSE
P15170-3	3.66258	0.807817	0.092687	P15170-3	FALSE
P15289	6.40666	0.62712	0.202649	P15289	FALSE
P15311	5.60992	0.374664	0.426358	EZR	FALSE
P15498	6.99423	0.496777	0.303838	VAV1	FALSE
P15509-7	6.96604	0.660918	0.179853	P15509-7	FALSE
P15529-3	5.2511	0.330115	0.481334	P15529-3	FALSE
P15559	6.50844	0.978149	0.00959513	NQO1	FALSE
P15586	9.40161	0.380701	0.419416	GNS	FALSE
P15848	11.5282	0.103494	0.985086	ARSB	FALSE
P15880	5.85626	0.584268	0.233388	RPS2	FALSE
P15954	8.88411	0.393229	0.405354	COX7C	FALSE
P16070	6.31261	0.487339	0.312168	CD44	FALSE
P16104	8.34743	0.945777	0.0242113	H2AX	FALSE
P16150	8.79805	0.363788	0.439151	SPN	FALSE
P16152	4.15862	0.78223	0.106666	CBR1	FALSE
P16219	9.23275	0.390949	0.40788	ACADS	FALSE
P16278	6.70572	0.623724	0.205007	P16278	FALSE
P16284	7.61496	0.879245	0.0558902	PECAM1	FALSE
P16333	6.98064	0.968203	0.0140335	NCK1	FALSE
P16401	6.4402	0.895581	0.0478951	H1-5	FALSE
P16402	6.81481	0.965779	0.0151221	H1-3	FALSE
P16403	7.07579	0.997531	0.00107365	P16403	FALSE
P16435	7.52283	0.369209	0.432727	POR	FALSE
P16455	10.9794	0.175028	0.756893	MGMT	FALSE
P16615	5.69269	0.892337	0.0494709	ATP2A2	FALSE
P16885	4.01517	0.693398	0.159017	PLCG2	FALSE
P16930	6.05002	0.5984	0.223009	FAH	FALSE
P16949	5.00347	0.462931	0.334484	STMN1	FALSE
P17050	6.51926	0.573558	0.241422	NAGA	FALSE
P17152	5.7406	0.983069	0.00741592	P17152	FALSE
P17252	7.34532	0.450317	0.346482	PRKCA	FALSE
P17480	4.15987	0.580701	0.236047	UBTF	FALSE
P17568	5.41228	0.727514	0.138158	NDUFB7	FALSE
P17655	4.314	0.388217	0.410925	CAPN2	FALSE
P17706	5.28934	0.447978	0.348743	P17706	FALSE
P17812	4.13454	0.767777	0.114765	CTPS1	FALSE
P17813	5.66727	0.744387	0.128201	ENG	FALSE
P17844	4.56651	0.183465	0.736447	DDX5	FALSE
P17858	4.99658	0.396964	0.401249	PFKL	FALSE
P17931	13.8112	0.00120409	2.91934	LGALS3	TRUE
P17980	4.82512	0.753241	0.123066	PSMC3	FALSE
P17987	4.4273	0.520376	0.283683	TCP1	FALSE
P18031	6.33397	0.915926	0.0381397	PTPN1	FALSE
P18077	4.27936	0.275892	0.559262	RPL35A	FALSE
P18084	7.25212	0.488414	0.311212	P18084	FALSE
P18124	5.04398	0.57697	0.238847	RPL7	FALSE
P18206	3.99111	0.659112	0.181041	VCL	FALSE
P18433	6.9235	0.572638	0.24212	P18433	FALSE
P18615-3	8.81335	0.925348	0.0336947	P18615-3	FALSE
P18621-3	4.02862	0.411341	0.385798	P18621-3	FALSE
P18669	5.76611	0.59631	0.224528	PGAM1	FALSE
P18754-2	6.95582	0.595032	0.22546	P18754-2	FALSE
P18850	7.77753	0.463162	0.334267	ATF6	FALSE
P18859-2	7.83736	0.381325	0.418705	P18859-2	FALSE
P19338	4.32443	0.971422	0.012592	NCL	FALSE
P19388	6.15545	0.751229	0.124228	POLR2E	FALSE
P19404	8.47276	0.609124	0.215294	NDUFV2	FALSE
P19440	7.24799	0.796617	0.0987505	GGT1	FALSE
P19474	3.68226	0.770184	0.113405	TRIM21	FALSE
P19525	5.11784	0.379988	0.42023	EIF2AK2	FALSE
P19532	7.85406	0.690398	0.1609	P19532	FALSE
P19623	4.00194	0.621546	0.206527	SRM	FALSE
P19634	6.27529	0.663922	0.177883	P19634	FALSE
P19801-2	5.1247	0.491164	0.308774	P19801-2	FALSE
P19838-2	5.61785	0.534337	0.272185	P19838-2	FALSE
P19878	4.61921	0.574691	0.240566	NCF2	FALSE
P19971	4.37291	0.305332	0.515228	TYMP	FALSE
P20020	7.07821	0.440328	0.356224	ATP2B1	FALSE
P20042	9.51914	0.955991	0.019546	EIF2S2	FALSE
P20073	7.71449	0.870338	0.0603122	ANXA7	FALSE
P20138	6.21764	0.633638	0.198159	CD33	FALSE
P20160	6.07513	0.641678	0.192683	P20160	FALSE
P20290	7.8261	0.918431	0.0369537	P20290	FALSE
P20333	4.55319	0.393192	0.405396	P20333	FALSE
P20338	11.4598	0.411886	0.385223	RAB4A	FALSE
P20339	5.9906	0.678792	0.168263	RAB5A	FALSE
P20585	7.18882	0.791096	0.101771	MSH3	FALSE
P20591	2.84761	0.766936	0.115241	MX1	FALSE
P20592	7.1276	0.590528	0.22876	MX2	FALSE
P20618	4.16861	0.498825	0.302051	PSMB1	FALSE
P20645	11.1037	0.67617	0.169944	M6PR	FALSE
P20674	5.38935	0.65148	0.186099	COX5A	FALSE
P20700	6.20529	0.658296	0.181579	LMNB1	FALSE
P20701-2	4.91794	0.429167	0.367373	P20701-2	FALSE
P20702	7.90019	0.767757	0.114776	ITGAX	FALSE
P20839-6	4.39114	0.860831	0.0650821	P20839-6	FALSE
P20933	10.8484	0.360137	0.443532	P20933	FALSE
P21281	12.96	0.313318	0.504014	ATP6V1B2	FALSE
P21283	8.09583	0.86066	0.0651681	ATP6V1C1	FALSE
P21291	7.77119	0.48225	0.316727	CSRP1	FALSE
P21359	11.1732	0.794752	0.0997681	NF1	FALSE
P21796	5.71491	0.663702	0.178027	VDAC1	FALSE
P21912	4.06371	0.535204	0.27148	SDHB	FALSE
P21953	6.31054	0.917159	0.0375552	P21953	FALSE
P21964	7.36767	0.399189	0.398821	COMT	FALSE
P22033	5.8125	0.963591	0.0161071	MMUT	FALSE
P22059	9.69241	0.303407	0.517975	OSBP	FALSE
P22061-2	9.19817	0.775453	0.110445	P22061-2	FALSE
P22083	4.002	0.151254	0.820293	P22083	FALSE
P22087	5.49615	0.56816	0.245529	FBL	FALSE
P22090	11.2766	0.240656	0.618603	RPS4Y1	FALSE
P22102	5.77838	0.735985	0.133131	GART	FALSE
P22234-2	4.34723	0.433048	0.363464	P22234-2	FALSE
P22307	5.34507	0.855245	0.0679093	SCP2	FALSE
P22392-2	4.51966	0.617394	0.209437	P22392-2	FALSE
P22626	4.80047	0.978952	0.00923845	HNRNPA2B1	FALSE
P22681	6.30097	0.484109	0.315057	CBL	FALSE
P22692	7.34849	0.858013	0.066506	IGFBP4	FALSE
P22695	6.99404	0.195134	0.709666	UQCRC2	FALSE
P22732	5.5046	0.441457	0.355111	SLC2A5	FALSE
P22794-2	5.23532	0.720829	0.142168	P22794-2	FALSE
P22830-2	8.49044	0.324745	0.488457	P22830-2	FALSE
P23141-2	7.04344	0.878488	0.0562644	P23141-2	FALSE
P23193	15.0027	0.163896	0.785431	TCEA1	FALSE
P23219-5	5.02837	0.422939	0.373722	P23219-5	FALSE
P23246	6.43706	0.760468	0.118919	SFPQ	FALSE
P23258	5.0115	0.518429	0.285311	TUBG1	FALSE
P23284	8.31997	0.21252	0.672599	PPIB	FALSE
P23368	7.47104	0.82702	0.0824842	ME2	FALSE
P23381	5.1734	0.462492	0.334896	WARS1	FALSE
P23396	7.21937	0.894933	0.0482095	RPS3	FALSE
P23434	5.75278	0.793742	0.100321	P23434	FALSE
P23458	8.0052	0.557098	0.254069	JAK1	FALSE
P23469	6.68646	0.410676	0.3865	PTPRE	FALSE
P23526	4.81576	0.681424	0.166583	AHCY	FALSE
P23528	4.64734	0.646877	0.189178	CFL1	FALSE
P23588	7.6192	0.643977	0.19113	EIF4B	FALSE
P23634	7.17647	0.826137	0.0829479	ATP2B4	FALSE
P23786	7.7895	0.267043	0.573419	CPT2	FALSE
P23919	6.71255	0.821777	0.0852462	DTYMK	FALSE
P23921	4.28833	0.388448	0.410667	RRM1	FALSE
P24534	8.24042	0.382065	0.417863	EEF1B2	FALSE
P24539	7.82783	0.259425	0.585989	ATP5PB	FALSE
P24557-3	5.07286	0.653905	0.184485	P24557-3	FALSE
P24666	4.68136	0.934854	0.0292562	ACP1	FALSE
P24752	8.98584	0.349063	0.457097	ACAT1	FALSE
P24844	10.3749	0.167822	0.775151	MYL9	FALSE
P24928	3.94368	0.632294	0.199081	POLR2A	FALSE
P24941	4.88048	0.749692	0.125117	CDK2	FALSE
P25098	8.38863	0.895015	0.0481699	GRK2	FALSE
P25205-2	4.02253	0.563271	0.249283	P25205-2	FALSE
P25325-2	5.72244	0.433051	0.363461	P25325-2	FALSE
P25398	5.93847	0.883483	0.0538017	RPS12	FALSE
P25490	6.79873	0.94368	0.0251754	YY1	FALSE
P25685	10.8567	0.718686	0.143461	DNAJB1	FALSE
P25686	7.8059	0.984124	0.00695028	P25686	FALSE
P25705	8.70263	0.310358	0.508137	ATP5F1A	FALSE
P25774	9.52826	0.840385	0.0755216	CTSS	FALSE
P25786-2	6.73442	0.750927	0.124402	P25786-2	FALSE
P25787	4.745	0.63119	0.19984	PSMA2	FALSE
P25788	5.63773	0.600845	0.221237	PSMA3	FALSE
P25789	4.32828	0.65906	0.181075	PSMA4	FALSE
P25942	5.31882	0.417561	0.37928	CD40	FALSE
P26010	8.97267	0.888952	0.0511216	ITGB7	FALSE
P26038	6.22882	0.143205	0.844041	MSN	FALSE
P26196	11.3973	0.201569	0.695576	DDX6	FALSE
P26368	8.29585	0.769576	0.113748	U2AF2	FALSE
P26373	7.75893	0.976924	0.010139	RPL13	FALSE
P26440	6.79724	0.454117	0.342832	IVD	FALSE
P26447	4.1422	0.338322	0.47067	S100A4	FALSE
P26572	7.16058	0.815495	0.0885789	MGAT1	FALSE
P26583	5.46351	0.690488	0.160844	HMGB2	FALSE
P26599-3	6.10767	0.852708	0.0691995	P26599-3	FALSE
P26639	4.0009	0.84421	0.0735494	TARS1	FALSE
P26640	3.682	0.474868	0.323427	VARS1	FALSE
P26885	6.58349	0.891112	0.0500677	FKBP2	FALSE
P27105	6.15308	0.926134	0.0333261	STOM	FALSE
P27144	5.99334	0.246472	0.608233	AK4	FALSE
P27348	4.47084	0.684777	0.164451	YWHAQ	FALSE
P27361	5.58972	0.65107	0.186372	MAPK3	FALSE
P27448	7.02704	0.564684	0.248195	P27448	FALSE
P27449	10.7727	0.810963	0.0909991	P27449	FALSE
P27540	7.09624	0.558178	0.253227	ARNT	FALSE
P27635	5.62916	0.482197	0.316776	RPL10	FALSE
P27694	5.84289	0.72685	0.138555	RPA1	FALSE
P27695	7.4711	0.483152	0.315916	APEX1	FALSE
P27701	7.29601	0.62633	0.203197	P27701	FALSE
P27707	4.38888	0.85625	0.0673993	DCK	FALSE
P27708	6.90516	0.743776	0.128558	CAD	FALSE
P27797	7.30757	0.480802	0.318034	CALR	FALSE
P27816	8.06858	0.878474	0.0562712	MAP4	FALSE
P27824-2	5.69875	0.707322	0.150383	P27824-2	FALSE
P27918	4.49414	0.914913	0.0386204	P27918	FALSE
P27986	7.32992	0.939489	0.0271082	PIK3R1	FALSE
P28062	4.73828	0.515642	0.287651	PSMB8	FALSE
P28065	4.57401	0.550521	0.259226	PSMB9	FALSE
P28066	5.58034	0.66512	0.1771	PSMA5	FALSE
P28070	5.59219	0.531556	0.274451	PSMB4	FALSE
P28288	4.47324	0.701299	0.154097	ABCD3	FALSE
P28290	6.63859	0.946876	0.0237068	P28290	FALSE
P28331-2	8.77842	0.116196	0.934808	P28331-2	FALSE
P28340	4.27955	0.943775	0.0251317	POLD1	FALSE
P28482	5.01791	0.673533	0.171641	MAPK1	FALSE
P28799	7.84332	0.665671	0.17674	GRN	FALSE
P28907	3.98016	0.481955	0.316993	CD38	FALSE
P29144	8.09215	0.796039	0.0990659	TPP2	FALSE
P29218-3	5.99133	0.579688	0.236806	P29218-3	FALSE
P29353-6	5.57851	0.876037	0.0574775	P29353-6	FALSE
P29372	3.43334	0.578064	0.238024	MPG	FALSE
P29466	4.85621	0.73022	0.136546	CASP1	FALSE
P29597	7.12344	0.457102	0.339987	P29597	FALSE
P29762	3.71445	0.514416	0.288686	CRABP1	FALSE
P30038	7.89109	0.371045	0.430574	ALDH4A1	FALSE
P30040	6.18835	0.995664	0.0018873	ERP29	FALSE
P30041	5.58377	0.779283	0.108305	PRDX6	FALSE
P30042	10.2852	0.224916	0.647979	GATD3	FALSE
P30043	5.36889	0.797487	0.0982762	BLVRB	FALSE
P30048	7.37784	0.334138	0.476074	PRDX3	FALSE
P30049	7.95605	0.673306	0.171787	ATP5F1D	FALSE
P30050	6.73973	0.84026	0.0755864	RPL12	FALSE
P30084	9.20854	0.443705	0.352905	ECHS1	FALSE
P30085	6.98213	0.842306	0.07453	CMPK1	FALSE
P30086	4.53049	0.48182	0.317115	PEBP1	FALSE
P30101	8.02839	0.953159	0.0208346	PDIA3	FALSE
P30153	7.34956	0.825023	0.0835337	PPP2R1A	FALSE
P30273	9.67607	0.698084	0.156092	FCER1G	FALSE
P30405	8.96373	0.239434	0.620814	PPIF	FALSE
P30419	8.50572	0.653473	0.184773	NMT1	FALSE
P30511-3	9.37634	0.754372	0.122414	P30511-3	FALSE
P30519	7.19634	0.360607	0.442965	HMOX2	FALSE
P30520	6.23823	0.504626	0.29703	ADSS2	FALSE
P30530	6.22628	0.946197	0.0240186	P30530	FALSE
P30533	9.91952	0.0543274	1.26498	LRPAP1	FALSE
P30566	2.82974	0.366264	0.436206	ADSL	FALSE
P30626	3.71307	0.617952	0.209045	SRI	FALSE
P30740	4.35609	0.558567	0.252925	SERPINB1	FALSE
P30837	7.3168	0.322931	0.49089	ALDH1B1	FALSE
P30876	4.80853	0.518541	0.285217	POLR2B	FALSE
P31040	5.3616	0.863766	0.0636037	SDHA	FALSE
P31146	4.65019	0.420254	0.376488	CORO1A	FALSE
P31153	4.95541	0.631508	0.199621	MAT2A	FALSE
P31323	5.33252	0.550899	0.258928	PRKAR2B	FALSE
P31689	7.38013	0.996267	0.00162409	DNAJA1	FALSE
P31930	7.82844	0.347327	0.459262	UQCRC1	FALSE
P31937	9.43846	0.157734	0.802074	HIBADH	FALSE
P31939	4.32831	0.682576	0.165849	ATIC	FALSE
P31943	7.57527	0.960131	0.0176696	HNRNPH1	FALSE
P31946	3.84086	0.424046	0.372587	YWHAB	FALSE
P31948-2	4.4502	0.592767	0.227116	P31948-2	FALSE
P31949	4.5107	0.431966	0.36455	S100A11	FALSE
P32119	5.24725	0.51942	0.284482	PRDX2	FALSE
P32189	8.80382	0.437441	0.359081	GK	FALSE
P32246	6.16759	0.840143	0.0756467	P32246	FALSE
P32322-3	4.59193	0.284196	0.546381	P32322-3	FALSE
P32519	8.092	0.86208	0.0644525	ELF1	FALSE
P32942	6.41126	0.946016	0.0241013	P32942	FALSE
P32969	7.22438	0.836918	0.077317	RPL9	FALSE
P32969	7.22438	0.836918	0.077317	RPL9P7	FALSE
P32969	7.22438	0.836918	0.077317	RPL9P8	FALSE
P32969	7.22438	0.836918	0.077317	RPL9P9	FALSE
P32970	5.64814	0.375089	0.425866	CD70	FALSE
P33121	7.5091	0.759259	0.11961	ACSL1	FALSE
P33176	5.30981	0.415716	0.381204	KIF5B	FALSE
P33241-3	5.34302	0.562039	0.250234	P33241-3	FALSE
P33527	7.01416	0.864902	0.063033	ABCC1	FALSE
P33897	4.62761	0.791231	0.101697	ABCD1	FALSE
P33908	7.76867	0.282787	0.54854	P33908	FALSE
P33991	5.47327	0.544429	0.264059	MCM4	FALSE
P33992	6.68478	0.922619	0.0349777	MCM5	FALSE
P33993	5.07314	0.700551	0.15456	MCM7	FALSE
P34059	5.33004	0.583747	0.233775	P34059	FALSE
P34820	6.60684	0.582041	0.235047	P34820	FALSE
P34897	6.11247	0.540171	0.267469	SHMT2	FALSE
P34910-2	6.47756	0.556156	0.254803	P34910-2	FALSE
P34913	4.79854	0.402434	0.395306	EPHX2	FALSE
P34932	6.04617	0.627449	0.202421	HSPA4	FALSE
P35221-2	8.87273	0.911718	0.0401393	P35221-2	FALSE
P35222	7.45045	0.845744	0.072761	P35222	FALSE
P35226	9.33132	0.468219	0.329551	P35226	FALSE
P35232	6.9325	0.492565	0.307536	PHB1	FALSE
P35236-3	4.9905	0.88384	0.0536266	P35236-3	FALSE
P35240	9.0821	0.997566	0.00105856	P35240	FALSE
P35241	8.47124	0.422297	0.374382	RDX	FALSE
P35249	3.62421	0.381415	0.418602	RFC4	FALSE
P35250	6.43927	0.478547	0.320076	RFC2	FALSE
P35251	9.11959	0.352158	0.453263	RFC1	FALSE
P35268	8.3177	0.670034	0.173903	RPL22	FALSE
P35269	8.14764	0.909163	0.0413583	GTF2F1	FALSE
P35270	7.7392	0.637474	0.195537	SPR	FALSE
P35408	7.01079	0.646405	0.189495	P35408	FALSE
P35475	8.92419	0.283699	0.547142	P35475	FALSE
P35520-2	5.61875	0.770327	0.113325	P35520-2	FALSE
P35556	6.01044	0.93023	0.0314096	P35556	FALSE
P35579	6.28438	0.849203	0.0709886	MYH9	FALSE
P35606	3.9041	0.32256	0.49139	COPB2	FALSE
P35611-3	14.8382	0.0645027	1.19042	P35611-3	FALSE
P35613	6.66251	0.592293	0.227463	BSG	FALSE
P35625	12.2613	0.264456	0.577647	TIMP3	FALSE
P35637	6.39567	0.7895	0.102648	FUS	FALSE
P35658-5	7.42555	0.867349	0.061806	P35658-5	FALSE
P35659	6.92845	0.731325	0.13589	DEK	FALSE
P35914	5.36625	0.49404	0.306238	HMGCL	FALSE
P35998	5.61298	0.927404	0.0327311	PSMC2	FALSE
P36222	8.31128	0.873187	0.0588929	CHI3L1	FALSE
P36404	5.78853	0.395257	0.403121	ARL2	FALSE
P36405	3.73982	0.423927	0.372709	ARL3	FALSE
P36507	3.39414	0.407773	0.389582	MAP2K2	FALSE
P36542	11.5161	0.296455	0.528041	ATP5F1C	FALSE
P36543	7.62305	0.689345	0.161564	ATP6V1E1	FALSE
P36551	8.92145	0.868721	0.0611199	CPOX	FALSE
P36578	5.56739	0.444838	0.351798	RPL4	FALSE
P36639	5.64856	0.367854	0.434325	NUDT1	FALSE
P36776	6.97474	0.472185	0.325888	LONP1	FALSE
P36957	5.85901	0.892224	0.0495262	DLST	FALSE
P36969	5.59466	0.45862	0.338547	GPX4	FALSE
P37108	5.60766	0.369071	0.43289	SRP14	FALSE
P37198	7.0219	0.803663	0.0949262	NUP62	FALSE
P37235	6.02769	0.803335	0.0951033	HPCAL1	FALSE
P37268	9.79031	0.534118	0.272363	FDFT1	FALSE
P37287	3.79772	0.756653	0.121103	P37287	FALSE
P37802	4.63878	0.578795	0.237475	TAGLN2	FALSE
P37837	5.68296	0.514389	0.288708	TALDO1	FALSE
P38117	10.8365	0.144531	0.84004	ETFB	FALSE
P38432	6.89825	0.817814	0.0873456	COIL	FALSE
P38435	5.68241	0.414468	0.382509	P38435	FALSE
P38606	5.14503	0.988907	0.00484454	ATP6V1A	FALSE
P38646	9.56225	0.148853	0.827243	HSPA9	FALSE
P38919	5.13919	0.76163	0.118256	EIF4A3	FALSE
P39019	6.86208	0.354461	0.450431	RPS19	FALSE
P39023	3.82776	0.708165	0.149866	RPL3	FALSE
P39656	7.61909	0.982124	0.00783389	DDOST	FALSE
P39687	6.19522	0.525948	0.279057	ANP32A	FALSE
P39748	6.36561	0.916235	0.037993	FEN1	FALSE
P40121	5.27555	0.588633	0.230155	CAPG	FALSE
P40222	8.75095	0.837564	0.0769822	TXLNA	FALSE
P40227	6.11262	0.445021	0.35162	CCT6A	FALSE
P40306	7.61833	0.879374	0.0558263	PSMB10	FALSE
P40429	4.81935	0.714942	0.145729	RPL13A	FALSE
P40763	4.8571	0.905616	0.0430558	STAT3	FALSE
P40818	19.6326	0.00240497	2.61889	USP8	TRUE
P40925-3	5.97008	0.551911	0.258131	P40925-3	FALSE
P40926	6.13784	0.80934	0.0918692	MDH2	FALSE
P40937	5.54229	0.663186	0.178364	RFC5	FALSE
P40938	9.74361	0.114242	0.942174	RFC3	FALSE
P40939	7.01389	0.438066	0.35846	HADHA	FALSE
P41091	6.89246	0.759272	0.119603	EIF2S3	FALSE
P41218	5.22383	0.85963	0.0656886	MNDA	FALSE
P41223	7.54881	0.508774	0.293475	BUD31	FALSE
P41226	3.77636	0.586042	0.232071	UBA7	FALSE
P41227	5.61823	0.778027	0.109005	NAA10	FALSE
P41240	6.97286	0.573313	0.241608	CSK	FALSE
P41250	5.90821	0.585494	0.232477	GARS1	FALSE
P41252	3.79607	0.6702	0.173795	IARS1	FALSE
P41440	4.60669	0.446526	0.350154	P41440	FALSE
P42126	6.93695	0.698078	0.156096	ECI1	FALSE
P42166	5.38744	0.933823	0.0297353	TMPO	FALSE
P42167	4.22332	0.631474	0.199645	TMPO	FALSE
P42226	5.59747	0.854864	0.0681032	STAT6	FALSE
P42285	3.13844	0.218634	0.660282	MTREX	FALSE
P42331-4	4.25118	0.49881	0.302065	P42331-4	FALSE
P42345	8.94954	0.492474	0.307617	MTOR	FALSE
P42356	5.38287	0.683468	0.165282	PI4KA	FALSE
P42566	3.01707	0.525991	0.279022	EPS15	FALSE
P42574	5.51316	0.508335	0.29385	CASP3	FALSE
P42677	6.41363	0.855555	0.0677519	RPS27	FALSE
P42696	4.78438	0.575823	0.239711	RBM34	FALSE
P42704	7.08263	0.453359	0.343558	LRPPRC	FALSE
P42765	6.10642	0.885675	0.0527254	ACAA2	FALSE
P42766	6.81674	0.829326	0.0812746	RPL35	FALSE
P42768	6.88244	0.86741	0.0617758	WAS	FALSE
P42785	12.7891	0.0274346	1.5617	P42785	TRUE
P43007	13.0408	0.0867339	1.06181	P43007	FALSE
P43155	11.4063	0.064159	1.19274	CRAT	FALSE
P43243	5.8392	0.383019	0.41678	MATR3	FALSE
P43246	5.08614	0.445741	0.350918	MSH2	FALSE
P43251-2	5.7458	0.592394	0.227389	P43251-2	FALSE
P43304	7.01058	0.547491	0.261623	GPD2	FALSE
P43307	6.65714	0.396117	0.402176	SSR1	FALSE
P43353	5.36894	0.548243	0.261027	P43353	FALSE
P43405	6.2831	0.487474	0.312049	SYK	FALSE
P43487	4.32221	0.672597	0.172245	RANBP1	FALSE
P43490	4.07429	0.402071	0.395698	NAMPT	FALSE
P43686	3.29858	0.443467	0.353139	PSMC4	FALSE
P43897	5.90691	0.486602	0.312826	TSFM	FALSE
P45954	9.25012	0.583249	0.234146	ACADSB	FALSE
P45973	8.48704	0.524569	0.280197	CBX5	FALSE
P45974	4.25416	0.355939	0.448625	USP5	FALSE
P46060	4.79862	0.330539	0.480777	RANGAP1	FALSE
P46063	5.99039	0.853862	0.0686121	RECQL	FALSE
P46100	5.15927	0.779838	0.107996	ATRX	FALSE
P46109	5.24336	0.652915	0.185143	CRKL	FALSE
P46199	5.22742	0.81727	0.0876342	P46199	FALSE
P46379-3	3.37633	0.67862	0.168373	P46379-3	FALSE
P46459	7.14711	0.625371	0.203862	NSF	FALSE
P46531	7.81456	0.828968	0.0814621	NOTCH1	FALSE
P46776	5.25568	0.406724	0.3907	RPL27A	FALSE
P46777	5.47744	0.450124	0.346668	RPL5	FALSE
P46778	9.21717	0.703519	0.152724	RPL21	FALSE
P46779	6.86748	0.495318	0.305116	RPL28	FALSE
P46781	4.80578	0.512656	0.290174	RPS9	FALSE
P46782	4.80466	0.546742	0.262218	RPS5	FALSE
P46783	8.35247	0.705861	0.151281	RPS10	FALSE
P46939	9.98124	0.988637	0.00496322	UTRN	FALSE
P46940	4.31116	0.517051	0.286467	IQGAP1	FALSE
P46977	5.20167	0.538811	0.268563	STT3A	FALSE
P47755	4.87228	0.996387	0.00157214	CAPZA2	FALSE
P47756-2	5.16622	0.708208	0.149839	P47756-2	FALSE
P47897	4.65865	0.887341	0.0519096	QARS1	FALSE
P47914	6.64986	0.543546	0.264764	RPL29	FALSE
P47985	8.24935	0.0801603	1.09604	UQCRFS1	FALSE
P48047	8.46636	0.719159	0.143175	ATP5PO	FALSE
P48059-3	6.65356	0.447739	0.348975	P48059-3	FALSE
P48147	4.32657	0.593661	0.226462	PREP	FALSE
P48426	5.8991	0.627107	0.202658	P48426	FALSE
P48444	3.67725	0.286235	0.543278	ARCN1	FALSE
P48449	5.08345	0.577997	0.238074	LSS	FALSE
P48507	3.59286	0.646487	0.18944	GCLM	FALSE
P48509	5.84474	0.408074	0.389261	CD151	FALSE
P48553	7.18081	0.750188	0.12483	TRAPPC10	FALSE
P48556	4.91147	0.510354	0.292129	PSMD8	FALSE
P48634	5.66432	0.665898	0.176592	PRRC2A	FALSE
P48637	6.09195	0.542123	0.265902	GSS	FALSE
P48643	3.99809	0.685617	0.163919	CCT5	FALSE
P48651	7.92152	0.761726	0.118201	P48651	FALSE
P48723	7.99504	0.996375	0.00157708	HSPA13	FALSE
P48735	7.15771	0.600841	0.22124	IDH2	FALSE
P48960	6.7818	0.570684	0.243604	ADGRE5	FALSE
P49069	5.24893	0.82925	0.0813146	P49069	FALSE
P49137	4.38142	0.515529	0.287747	MAPKAPK2	FALSE
P49189	7.79057	0.839068	0.0762028	ALDH9A1	FALSE
P49207	7.6106	0.640498	0.193482	RPL34	FALSE
P49247	4.76863	0.403954	0.393669	RPIA	FALSE
P49257	5.96583	0.533976	0.272478	LMAN1	FALSE
P49321-3	2.74993	0.851844	0.0696398	P49321-3	FALSE
P49327	4.44928	0.754987	0.122061	FASN	FALSE
P49368	3.77804	0.467895	0.329852	CCT3	FALSE
P49406	5.56626	0.534289	0.272224	P49406	FALSE
P49411	6.99386	0.792646	0.100921	TUFM	FALSE
P49448	10.2783	0.010599	1.97474	P49448	TRUE
P49458	8.37375	0.554314	0.256244	SRP9	FALSE
P49585	8.53524	0.493158	0.307014	PCYT1A	FALSE
P49588	4.29755	0.553628	0.256782	AARS1	FALSE
P49590	7.46078	0.743393	0.128782	HARS2	FALSE
P49591	5.67178	0.885437	0.0528423	SARS1	FALSE
P49593	5.26477	0.592567	0.227262	PPM1F	FALSE
P49711	7.03084	0.979278	0.00909406	CTCF	FALSE
P49736	3.89842	0.686201	0.163549	MCM2	FALSE
P49748-3	7.31462	0.245728	0.609546	P49748-3	FALSE
P49755	6.99297	0.148052	0.829586	TMED10	FALSE
P49756	4.35338	0.471673	0.326359	RBM25	FALSE
P49757	5.44447	0.708699	0.149538	NUMB	FALSE
P49768	8.70607	0.304172	0.51688	PSEN1	FALSE
P49773	6.35301	0.848258	0.0714721	HINT1	FALSE
P49790-3	7.38819	0.530573	0.275255	P49790-3	FALSE
P49792	8.13268	0.442177	0.354404	RANBP2	FALSE
P49795	5.78803	0.735455	0.133444	RGS19	FALSE
P49810	6.37488	0.920314	0.036064	P49810	FALSE
P49821	8.38833	0.208227	0.681463	NDUFV1	FALSE
P49840	7.58904	0.653646	0.184658	GSK3A	FALSE
P49841-2	7.79282	0.464371	0.333135	P49841-2	FALSE
P49915	4.67808	0.941806	0.0260384	GMPS	FALSE
P49916	4.82507	0.966125	0.0149669	LIG3	FALSE
P49959-3	4.44808	0.589833	0.229271	P49959-3	FALSE
P50148	5.72365	0.584942	0.232887	GNAQ	FALSE
P50151	7.8845	0.3997	0.398266	GNG10	FALSE
P50213	10.8443	0.40313	0.394555	IDH3A	FALSE
P50225	3.463	0.436225	0.360289	SULT1A1	FALSE
P50238	4.82398	0.619436	0.208004	CRIP1	FALSE
P50281	7.87191	0.892979	0.0491586	MMP14	FALSE
P50336	3.85051	0.493401	0.3068	P50336	FALSE
P50395	5.2972	0.671021	0.173264	GDI2	FALSE
P50416	4.25662	0.184627	0.733705	CPT1A	FALSE
P50440-2	8.55648	0.427674	0.368888	P50440-2	FALSE
P50452	5.28453	0.612228	0.213087	SERPINB8	FALSE
P50454	5.96298	0.998445	0.000675677	SERPINH1	FALSE
P50479	7.37523	0.787745	0.103614	PDLIM4	FALSE
P50502	4.52486	0.544028	0.264378	ST13	FALSE
P50552	8.87162	0.659868	0.180543	VASP	FALSE
P50895	6.66938	0.474867	0.323428	BCAM	FALSE
P50897	7.66301	0.426741	0.369836	PPT1	FALSE
P50914	13.0474	0.0958872	1.01824	RPL14	FALSE
P50990	3.70159	0.658649	0.181346	CCT8	FALSE
P50991	4.9524	0.657947	0.181809	CCT4	FALSE
P50995	6.77298	0.363029	0.440059	ANXA11	FALSE
P51003	11.9342	0.0575078	1.24027	PAPOLA	FALSE
P51148-2	7.29938	0.396197	0.402088	P51148-2	FALSE
P51149	10.558	0.348979	0.457201	RAB7A	FALSE
P51151	6.63258	0.835465	0.0780718	RAB9A	FALSE
P51153	6.55873	0.791951	0.101302	RAB13	FALSE
P51159	8.21406	0.65932	0.180904	RAB27A	FALSE
P51398	7.34173	0.578778	0.237488	DAP3	FALSE
P51452	4.71499	0.785599	0.104799	DUSP3	FALSE
P51531-2	5.68333	0.774243	0.111123	P51531-2	FALSE
P51553	8.83701	0.204084	0.690192	IDH3G	FALSE
P51570-2	4.15351	0.85066	0.0702442	P51570-2	FALSE
P51571	7.50525	0.52557	0.27937	SSR4	FALSE
P51572-2	7.50438	0.769399	0.113848	P51572-2	FALSE
P51610	8.024	0.868215	0.0613727	P51610	FALSE
P51649-2	6.27664	0.836379	0.0775967	P51649-2	FALSE
P51659	3.25413	0.36576	0.436804	HSD17B4	FALSE
P51665	3.25647	0.615316	0.210902	PSMD7	FALSE
P51689	4.89637	0.262612	0.580685	P51689	FALSE
P51787	8.6208	0.43347	0.363041	P51787	FALSE
P51797-5	8.46222	0.169051	0.771983	P51797-5	FALSE
P51798	9.15783	0.0540993	1.26681	P51798	FALSE
P51809	8.37644	0.589653	0.229404	VAMP7	FALSE
P51812	10.1053	0.382805	0.417023	RPS6KA3	FALSE
P51828	7.06444	0.723061	0.140825	P51828	FALSE
P51970	6.82571	0.682153	0.166118	NDUFA8	FALSE
P51991	5.58852	0.477987	0.320584	HNRNPA3	FALSE
P52209	4.1933	0.707755	0.150117	PGD	FALSE
P52272	8.33135	0.183308	0.736819	HNRNPM	FALSE
P52292	4.42949	0.417132	0.379726	KPNA2	FALSE
P52294	11.0774	0.285328	0.544655	KPNA1	FALSE
P52306-5	4.59385	0.831879	0.07994	P52306-5	FALSE
P52429	5.16482	0.64065	0.193379	P52429	FALSE
P52565	3.90981	0.511678	0.291003	ARHGDIA	FALSE
P52566	4.62052	0.651257	0.186248	ARHGDIB	FALSE
P52594-4	12.3297	0.0721379	1.14184	P52594-4	FALSE
P52597	8.45163	0.190158	0.720885	HNRNPF	FALSE
P52630	5.95373	0.408012	0.389327	STAT2	FALSE
P52701	7.98963	0.624238	0.20465	MSH6	FALSE
P52732	6.44833	0.997814	0.000950293	KIF11	FALSE
P52758	6.11533	0.819158	0.0866325	RIDA	FALSE
P52789	5.58561	0.745298	0.12767	HK2	FALSE
P52815	9.65125	0.596433	0.224438	MRPL12	FALSE
P52888	4.69732	0.501817	0.299454	THOP1	FALSE
P52907	5.24745	0.589732	0.229345	CAPZA1	FALSE
P52948	4.91566	0.346785	0.459939	NUP98	FALSE
P53007	7.53834	0.524933	0.279896	SLC25A1	FALSE
P53041	4.99456	0.528918	0.276612	PPP5C	FALSE
P53350	8.29259	0.504588	0.297063	PLK1	FALSE
P53582	6.0993	0.47406	0.324167	METAP1	FALSE
P53597	5.35098	0.776626	0.109788	SUCLG1	FALSE
P53602	6.60202	0.804094	0.0946934	MVD	FALSE
P53618	3.63995	0.378422	0.422023	COPB1	FALSE
P53621	3.8684	0.313818	0.503323	COPA	FALSE
P53634	10.7199	0.334805	0.475208	CTSC	FALSE
P53680	9.31801	0.458357	0.338797	P53680	FALSE
P53701	6.63847	0.992737	0.00316571	HCCS	FALSE
P53801	10.2097	0.0616377	1.21015	PTTG1IP	FALSE
P53990-2	13.6385	0.220137	0.657307	P53990-2	FALSE
P53992	8.40706	0.527799	0.277531	SEC24C	FALSE
P53999	6.36072	0.871177	0.0598937	SUB1	FALSE
P54098	7.63121	0.388021	0.411144	P54098	FALSE
P54136	4.96541	0.876943	0.0570285	RARS1	FALSE
P54577	4.49995	0.653437	0.184796	YARS1	FALSE
P54709	6.47482	0.672544	0.172279	ATP1B3	FALSE
P54762	9.23539	0.721209	0.141939	P54762	FALSE
P54819-2	9.72428	0.764966	0.116358	P54819-2	FALSE
P54920	6.4892	0.800376	0.0967059	NAPA	FALSE
P55010	5.10241	0.661938	0.179183	EIF5	FALSE
P55011	5.58951	0.689871	0.161232	P55011	FALSE
P55036	4.28847	0.453864	0.343074	PSMD4	FALSE
P55060	4.48018	0.951172	0.0217411	CSE1L	FALSE
P55072	4.66424	0.248521	0.604637	VCP	FALSE
P55082	6.1602	0.536395	0.270515	P55082	FALSE
P55084	8.02596	0.588483	0.230266	HADHB	FALSE
P55145	8.11002	0.806258	0.0935262	MANF	FALSE
P55160	8.29296	0.957489	0.0188663	NCKAP1L	FALSE
P55196-5	6.11715	0.472293	0.325788	P55196-5	FALSE
P55209	6.84669	0.911624	0.040184	P55209	FALSE
P55735	6.5459	0.581803	0.235224	SEC13	FALSE
P55769	6.31553	0.451801	0.345053	SNU13	FALSE
P55786	5.14735	0.518466	0.285279	NPEPPS	FALSE
P55789	6.51013	0.783435	0.105997	P55789	FALSE
P55809	6.31954	0.692399	0.159643	OXCT1	FALSE
P55884-2	5.45034	0.710171	0.148637	P55884-2	FALSE
P55899	9.24277	0.923705	0.0344666	P55899	FALSE
P55957-2	8.05157	0.830785	0.0805111	P55957-2	FALSE
P56181-2	7.13621	0.973713	0.0115688	P56181-2	FALSE
P56182	4.49114	0.595943	0.224795	RRP1	FALSE
P56192	5.14541	0.969278	0.0135517	MARS1	FALSE
P56377	7.77063	0.419064	0.377719	AP1S2	FALSE
P56378	4.85023	0.555581	0.255253	P56378	FALSE
P56381	9.40737	0.00138564	2.85835	ATP5F1E	TRUE
P56385	4.19887	0.266039	0.575054	ATP5ME	FALSE
P56537	7.22213	0.598458	0.222966	EIF6	FALSE
P56589	6.05402	0.569188	0.244744	P56589	FALSE
P56730	10.8085	0.730423	0.136426	PRSS12	FALSE
P56962	6.9405	0.758528	0.120029	P56962	FALSE
P57088	8.23693	0.486606	0.312822	P57088	FALSE
P57105	8.44228	0.559741	0.252013	SYNJ2BP	FALSE
P57740	4.28485	0.281708	0.550201	NUP107	FALSE
P57772	9.81699	0.731317	0.135894	EEFSEC	FALSE
P59998-3	7.50352	0.660592	0.180067	P59998-3	FALSE
P60033	8.18251	0.810946	0.0910078	CD81	FALSE
P60174	5.30387	0.569087	0.244821	TPI1	FALSE
P60228	6.11617	0.97826	0.00954583	EIF3E	FALSE
P60468	6.49121	0.86573	0.0626176	P60468	FALSE
P60604	4.82229	0.379648	0.420619	UBE2G2	FALSE
P60842	5.2569	0.790366	0.102172	EIF4A1	FALSE
P60866-2	6.16727	0.674373	0.1711	P60866-2	FALSE
P60891	5.52331	0.762158	0.117955	PRPS1	FALSE
P60953	10.9014	0.166566	0.778414	CDC42	FALSE
P60981	4.98979	0.589567	0.229467	DSTN	FALSE
P61006	6.62439	0.976684	0.0102459	RAB8A	FALSE
P61009	6.53231	0.854248	0.068416	SPCS3	FALSE
P61011	7.40072	0.504945	0.296756	SRP54	FALSE
P61018-2	8.93055	0.665057	0.177141	P61018-2	FALSE
P61019	6.80643	0.863346	0.0638151	RAB2A	FALSE
P61020	8.91136	0.524935	0.279895	RAB5B	FALSE
P61026	7.38621	0.537517	0.269608	RAB10	FALSE
P61081	3.12972	0.812718	0.09006	UBE2M	FALSE
P61088	4.98907	0.658985	0.181125	UBE2N	FALSE
P61106	9.04488	0.36413	0.438744	RAB14	FALSE
P61158	7.6578	0.838597	0.0764469	ACTR3	FALSE
P61160	7.7606	0.751567	0.124032	ACTR2	FALSE
P61163	3.86108	0.422616	0.374054	ACTR1A	FALSE
P61221	6.84487	0.685137	0.164222	ABCE1	FALSE
P61224	5.95611	0.642046	0.192434	RAP1B	FALSE
P61247	6.94884	0.54226	0.265792	RPS3A	FALSE
P61313	6.13164	0.855049	0.068009	RPL15	FALSE
P61353	6.8627	0.580412	0.236264	RPL27	FALSE
P61421	7.81088	0.793399	0.100508	ATP6V0D1	FALSE
P61513	5.70271	0.472092	0.325974	RPL37A	FALSE
P61586	7.46004	0.956512	0.0193097	RHOA	FALSE
P61604	7.83659	0.263086	0.579902	HSPE1	FALSE
P61619	6.65701	0.749994	0.124942	SEC61A1	FALSE
P61626	7.63623	0.699988	0.15491	LYZ	FALSE
P61758	5.84576	0.572329	0.242354	VBP1	FALSE
P61769	8.08041	0.590869	0.228509	B2M	FALSE
P61803	7.32456	0.268049	0.571786	DAD1	FALSE
P61916	5.82559	0.71268	0.147105	NPC2	FALSE
P61923-4	6.2916	0.840235	0.0755994	P61923-4	FALSE
P61927	6.30792	0.701165	0.15418	P61927	FALSE
P61964	5.26986	0.463209	0.334223	WDR5	FALSE
P61981	4.63222	0.621706	0.206415	YWHAG	FALSE
P62070-4	5.39577	0.419465	0.377305	P62070-4	FALSE
P62072	7.79396	0.204217	0.689908	TIMM10	FALSE
P62081	10.0751	0.886748	0.0521996	RPS7	FALSE
P62136	5.60359	0.538921	0.268475	PPP1CA	FALSE
P62158	5.03131	0.231132	0.63614	CALM1	FALSE
P62158	5.03131	0.231132	0.63614	CALM2	FALSE
P62158	5.03131	0.231132	0.63614	CALM3	FALSE
P62191	5.94989	0.616722	0.20991	PSMC1	FALSE
P62195	4.15746	0.578088	0.238006	PSMC5	FALSE
P62241	5.50101	0.350959	0.454744	RPS8	FALSE
P62244	7.17958	0.93609	0.0286824	RPS15A	FALSE
P62249	4.46355	0.366101	0.436399	RPS16	FALSE
P62258	5.22338	0.612084	0.213189	YWHAE	FALSE
P62263	9.15751	0.756049	0.12145	RPS14	FALSE
P62266	6.57835	0.555992	0.254932	RPS23	FALSE
P62269	6.2101	0.736813	0.132643	RPS18	FALSE
P62273	7.48741	0.795881	0.0991517	RPS29	FALSE
P62277	6.40988	0.872081	0.0594433	RPS13	FALSE
P62280	7.03482	0.710124	0.148666	RPS11	FALSE
P62316	7.22245	0.969455	0.0134724	SNRPD2	FALSE
P62318	5.81517	0.639958	0.193848	SNRPD3	FALSE
P62330	9.1001	0.955526	0.0197575	ARF6	FALSE
P62333	3.93887	0.345714	0.461283	PSMC6	FALSE
P62424	7.61037	0.640104	0.193749	RPL7A	FALSE
P62495	9.37611	0.758411	0.120096	ETF1	FALSE
P62701	6.34478	0.502172	0.299147	RPS4X	FALSE
P62750	5.01142	0.461609	0.335725	RPL23A	FALSE
P62753	6.34217	0.44276	0.353832	RPS6	FALSE
P62805	5.604	0.666342	0.176303	H4C1	FALSE
P62805	5.604	0.666342	0.176303	H4C11	FALSE
P62805	5.604	0.666342	0.176303	H4C12	FALSE
P62805	5.604	0.666342	0.176303	H4C13	FALSE
P62805	5.604	0.666342	0.176303	H4C14	FALSE
P62805	5.604	0.666342	0.176303	H4C15	FALSE
P62805	5.604	0.666342	0.176303	H4C16	FALSE
P62805	5.604	0.666342	0.176303	H4C2	FALSE
P62805	5.604	0.666342	0.176303	H4C3	FALSE
P62805	5.604	0.666342	0.176303	H4C4	FALSE
P62805	5.604	0.666342	0.176303	H4C5	FALSE
P62805	5.604	0.666342	0.176303	H4C6	FALSE
P62805	5.604	0.666342	0.176303	H4C8	FALSE
P62805	5.604	0.666342	0.176303	H4C9	FALSE
P62820	6.9087	0.404589	0.392985	RAB1A	FALSE
P62826	4.32527	0.983244	0.0073386	RAN	FALSE
P62829	7.41085	0.524586	0.280183	RPL23	FALSE
P62834	5.63283	0.873779	0.0585984	RAP1A	FALSE
P62841	5.14221	0.519354	0.284537	RPS15	FALSE
P62851	7.03236	0.227078	0.643825	RPS25	FALSE
P62854	6.33444	0.803196	0.0951784	RPS26	FALSE
P62857	4.20384	0.471486	0.326531	RPS28	FALSE
P62861	6.59099	0.661701	0.179338	FAU	FALSE
P62873	4.99935	0.504735	0.296937	GNB1	FALSE
P62879	4.6822	0.347005	0.459665	GNB2	FALSE
P62888	9.9825	0.655846	0.183198	RPL30	FALSE
P62899	7.59403	0.704975	0.151827	RPL31	FALSE
P62906	4.87346	0.944543	0.0247781	RPL10A	FALSE
P62910	5.94397	0.59563	0.225024	RPL32	FALSE
P62913	8.27075	0.7984	0.0977792	RPL11	FALSE
P62917	7.30254	0.885166	0.0529752	RPL8	FALSE
P62937	5.60087	0.72806	0.137833	PPIA	FALSE
P62979	8.70359	0.559181	0.252448	RPS27A	FALSE
P62993	4.92737	0.56447	0.248359	GRB2	FALSE
P63000-2	7.92981	0.829792	0.0810307	P63000-2	FALSE
P63010-2	10.9525	0.303625	0.517662	P63010-2	FALSE
P63104	4.62877	0.737176	0.132429	YWHAZ	FALSE
P63151-2	3.85795	0.55466	0.255973	P63151-2	FALSE
P63165	5.86146	0.998249	0.000761218	SUMO1	FALSE
P63167	8.52145	0.721945	0.141496	DYNLL1	FALSE
P63173	5.56003	0.538691	0.26866	RPL38	FALSE
P63208	3.87809	0.324499	0.488787	SKP1	FALSE
P63218	4.21624	0.660092	0.180395	GNG5	FALSE
P63220	6.17503	0.701647	0.153881	RPS21	FALSE
P63244	10.4634	0.280655	0.551827	RACK1	FALSE
P63279	6.17626	0.803566	0.0949785	UBE2I	FALSE
P67809	5.46256	0.330488	0.480844	YBX1	FALSE
P67812-3	6.89558	0.844896	0.0731969	P67812-3	FALSE
P67870	9.67642	0.71438	0.146071	CSNK2B	FALSE
P67936	3.19948	0.549052	0.260386	TPM4	FALSE
P68032	7.10495	0.70657	0.150845	P68032	FALSE
P68036-3	4.25015	0.471795	0.326246	P68036-3	FALSE
P68104	4.52806	0.565571	0.247513	EEF1A1	FALSE
P68371	7.36202	0.526867	0.278299	TUBB4B	FALSE
P68400	10.7428	0.35931	0.444531	CSNK2A1	FALSE
P69905	3.41909	0.520863	0.283276	HBA1	FALSE
P69905	3.41909	0.520863	0.283276	HBA2	FALSE
P78316	6.77793	0.685497	0.163995	NOP14	FALSE
P78324	7.34463	0.495018	0.305379	P78324	FALSE
P78347	4.86498	0.531838	0.274221	GTF2I	FALSE
P78356	10.9068	0.16807	0.774511	PIP4K2B	FALSE
P78368	6.08516	0.344958	0.462234	P78368	FALSE
P78371	3.68795	0.582646	0.234595	CCT2	FALSE
P78406	7.65784	0.423053	0.373605	RAE1	FALSE
P78417	5.21944	0.579083	0.237259	GSTO1	FALSE
P78527	9.07446	0.936132	0.0286629	PRKDC	FALSE
P78536	5.97187	0.645289	0.190245	ADAM17	FALSE
P80217-2	11.0189	0.178802	0.747627	P80217-2	FALSE
P80303	8.02985	0.400872	0.396994	NUCB2	FALSE
P80723	8.6516	0.411915	0.385193	BASP1	FALSE
P82094-2	6.5134	0.723501	0.140561	P82094-2	FALSE
P82650	6.02618	0.676895	0.169479	MRPS22	FALSE
P82663	6.96962	0.927407	0.0327296	MRPS25	FALSE
P82673	6.95306	0.916319	0.0379534	MRPS35	FALSE
P82675	5.43006	0.784678	0.105308	MRPS5	FALSE
P82909	6.1034	0.829733	0.0810618	KGD4	FALSE
P82912	7.72746	0.2392	0.621238	MRPS11	FALSE
P82921	8.07151	0.732748	0.135046	P82921	FALSE
P82930	8.17068	0.248058	0.605446	MRPS34	FALSE
P82933	7.62135	0.995741	0.00185347	MRPS9	FALSE
P82979	4.80825	0.607774	0.216258	SARNP	FALSE
P83111	6.99233	0.924938	0.0338873	LACTB	FALSE
P83731	8.01544	0.682408	0.165956	RPL24	FALSE
P83881	5.8972	0.835051	0.0782871	RPL36A	FALSE
P84077	3.52598	0.878417	0.0562993	P84077	FALSE
P84090	8.70015	0.933168	0.0300402	ERH	FALSE
P84095	8.00673	0.418588	0.378214	RHOG	FALSE
P84098	7.37286	0.898091	0.0466795	RPL19	FALSE
P84101	4.85906	0.277054	0.557435	SERF2	FALSE
P84103	7.5564	0.59841	0.223001	SRSF3	FALSE
P85037	4.47468	0.985618	0.0062915	FOXK1	FALSE
P86790	10.2644	0.712392	0.147281	CCZ1B	FALSE
P98082	7.55998	0.545258	0.263398	DAB2	FALSE
P98155-2	7.186	0.930471	0.031297	P98155-2	FALSE
P98160	6.08731	0.313616	0.503602	P98160	FALSE
P98171-2	12.917	0.644413	0.190836	P98171-2	FALSE
P98175-3	10.1035	0.128365	0.891554	P98175-3	FALSE
P98179	4.62467	0.498419	0.302406	RBM3	FALSE
P98194-7	9.01294	0.396727	0.401508	P98194-7	FALSE
P98196	5.74803	0.539045	0.268375	P98196	FALSE
P99999	8.73808	0.468538	0.329255	CYCS	FALSE
Q00013	6.29829	0.894079	0.0486239	MPP1	FALSE
Q00059	8.92583	0.152872	0.815671	TFAM	FALSE
Q00325-2	5.72678	0.574146	0.240978	Q00325-2	FALSE
Q00341	4.34885	0.416253	0.380643	HDLBP	FALSE
Q00534	3.69992	0.41129	0.385852	CDK6	FALSE
Q00535	5.5028	0.712698	0.147094	CDK5	FALSE
Q00577	8.40724	0.477876	0.320685	PURA	FALSE
Q00610	6.44647	0.802547	0.0955294	CLTC	FALSE
Q00688	7.81384	0.60904	0.215354	FKBP3	FALSE
Q00765	9.50179	0.0445445	1.35121	REEP5	TRUE
Q00796	5.05348	0.407953	0.38939	SORD	FALSE
Q00839	8.68856	0.559603	0.25212	HNRNPU	FALSE
Q00839-2	4.79812	0.735035	0.133692	Q00839-2	FALSE
Q01081	7.80306	0.972761	0.0119939	U2AF1	FALSE
Q01082	11.1788	0.130984	0.882782	SPTBN1	FALSE
Q01082-3	6.4373	0.902829	0.0443943	Q01082-3	FALSE
Q01196-8	8.31857	0.990166	0.00429193	Q01196-8	FALSE
Q01433	7.76744	0.992572	0.0032378	AMPD2	FALSE
Q01459	9.65228	0.885385	0.0528679	Q01459	FALSE
Q01469	4.393	0.544337	0.264132	FABP5	FALSE
Q01518	4.94594	0.587929	0.230675	CAP1	FALSE
Q01581	3.94769	0.712651	0.147123	HMGCS1	FALSE
Q01650	5.8947	0.685474	0.164009	Q01650	FALSE
Q01780	4.22575	0.591161	0.228294	EXOSC10	FALSE
Q01813	9.32803	0.752992	0.123209	PFKP	FALSE
Q01826-2	6.4322	0.987929	0.00527422	Q01826-2	FALSE
Q01844-5	5.57203	0.62885	0.201453	Q01844-5	FALSE
Q01968	8.02684	0.966614	0.0147469	Q01968	FALSE
Q01970	9.93654	0.79106	0.101791	PLCB3	FALSE
Q02040	6.76337	0.568737	0.245089	AKAP17A	FALSE
Q02127	11.8152	0.486534	0.312887	DHODH	FALSE
Q02218	4.29059	0.559847	0.251931	OGDH	FALSE
Q02241	6.03096	0.740625	0.130402	KIF23	FALSE
Q02252	3.89434	0.407826	0.389525	ALDH6A1	FALSE
Q02338	6.53886	0.86112	0.0649362	BDH1	FALSE
Q02543	5.78019	0.915378	0.0383993	RPL18A	FALSE
Q02556	6.28992	0.73503	0.133695	IRF8	FALSE
Q02790	5.36753	0.698364	0.155918	FKBP4	FALSE
Q02809-2	8.6142	0.52012	0.283896	Q02809-2	FALSE
Q02818	8.29567	0.651506	0.186082	NUCB1	FALSE
Q02878	5.15643	0.487292	0.312211	RPL6	FALSE
Q02880-2	5.41703	0.960863	0.0173387	Q02880-2	FALSE
Q02978	8.44211	0.277376	0.556931	SLC25A11	FALSE
Q03169	5.64654	0.817769	0.0873693	TNFAIP2	FALSE
Q03188	5.83216	0.561714	0.250485	CENPC	FALSE
Q03252	9.86241	0.964172	0.0158455	LMNB2	FALSE
Q03405	4.30607	0.271072	0.566916	Q03405	FALSE
Q03426	5.82427	0.563166	0.249364	MVK	FALSE
Q03518	4.67267	0.908009	0.0419099	TAP1	FALSE
Q03519	5.28851	0.598175	0.223172	TAP2	FALSE
Q03701	4.91969	0.709538	0.149025	CEBPZ	FALSE
Q04206	5.81919	0.738314	0.131759	RELA	FALSE
Q04323-2	3.719	0.923535	0.0345465	Q04323-2	FALSE
Q04446	5.35844	0.597906	0.223367	GBE1	FALSE
Q04721	13.1347	0.153361	0.814284	NOTCH2	FALSE
Q04759	6.76191	0.338402	0.470567	Q04759	FALSE
Q04760	4.9784	0.628808	0.201482	GLO1	FALSE
Q04837	5.69715	0.970131	0.0131694	SSBP1	FALSE
Q04917	4.5136	0.658149	0.181676	YWHAH	FALSE
Q04941	6.31884	0.399276	0.398727	PLP2	FALSE
Q05193	4.40251	0.545364	0.263314	DNM1	FALSE
Q05209	8.74877	0.367731	0.43447	PTPN12	FALSE
Q05639	7.1799	0.99951	0.000212756	EEF1A2	FALSE
Q05655	3.62995	0.299482	0.523629	PRKCD	FALSE
Q05D32	6.04799	0.917519	0.0373851	CTDSPL2	FALSE
Q06055-2	5.3381	0.754843	0.122143	Q06055-2	FALSE
Q06124-2	4.13148	0.758554	0.120014	Q06124-2	FALSE
Q06136	6.59956	0.89197	0.0496498	Q06136	FALSE
Q06187-2	5.67373	0.758756	0.119898	Q06187-2	FALSE
Q06210	2.51462	0.321783	0.492437	GFPT1	FALSE
Q06323	4.34904	0.54885	0.260546	PSME1	FALSE
Q06481	6.13835	0.650241	0.186926	APLP2	FALSE
Q06830	5.32978	0.682222	0.166074	PRDX1	FALSE
Q07020	5.64845	0.86817	0.0613954	RPL18	FALSE
Q07021	4.40766	0.536319	0.270577	C1QBP	FALSE
Q07065	6.27126	0.979414	0.00903371	CKAP4	FALSE
Q07666	8.91345	0.0471285	1.32672	KHDRBS1	TRUE
Q07812-2	5.1654	0.810102	0.0914605	Q07812-2	FALSE
Q07820	7.47553	0.575932	0.239629	MCL1	FALSE
Q07954	6.65223	0.758566	0.120007	Q07954	FALSE
Q07955	4.07726	0.563211	0.249329	SRSF1	FALSE
Q07960	4.41312	0.625698	0.203635	ARHGAP1	FALSE
Q08209-2	6.78782	0.722888	0.140929	Q08209-2	FALSE
Q08211	5.9464	0.726918	0.138515	DHX9	FALSE
Q08334	9.94911	0.86034	0.06533	Q08334	FALSE
Q08357	5.13884	0.60936	0.215126	Q08357	FALSE
Q08378	5.88738	0.856786	0.0671275	GOLGA3	FALSE
Q08379	4.277	0.467902	0.329845	GOLGA2	FALSE
Q08380	11.1032	0.289105	0.538944	LGALS3BP	FALSE
Q08426	5.55507	0.711603	0.147763	EHHADH	FALSE
Q08722	9.16184	0.204281	0.689772	CD47	FALSE
Q08752	4.14164	0.315851	0.500517	PPID	FALSE
Q08945	7.21637	0.763089	0.117425	SSRP1	FALSE
Q08AM6	6.82089	0.610694	0.214176	VAC14	FALSE
Q08J23	5.58477	0.905942	0.0428997	NSUN2	FALSE
Q09028	9.6008	0.714856	0.145781	RBBP4	FALSE
Q09161	4.49148	0.645958	0.189795	NCBP1	FALSE
Q09328	5.52356	0.351475	0.454105	Q09328	FALSE
Q09472	7.2337	0.747257	0.12653	EP300	FALSE
Q09666	7.08239	0.740436	0.130513	AHNAK	FALSE
Q0JRZ9	5.37173	0.556347	0.254654	FCHO2	FALSE
Q0VD83-4	7.14346	0.625144	0.20402	Q0VD83-4	FALSE
Q0VDF9	9.04076	0.804062	0.0947106	HSPA14	FALSE
Q10469	9.40148	0.0352577	1.45275	MGAT2	TRUE
Q10471	6.21729	0.433786	0.362725	GALNT2	FALSE
Q10472	6.57049	0.947998	0.0231927	GALNT1	FALSE
Q10570	3.70271	0.824546	0.0837851	CPSF1	FALSE
Q10588	14.2765	0.481225	0.317651	BST1	FALSE
Q10589	8.63479	0.690041	0.161125	BST2	FALSE
Q10713	7.79884	0.769024	0.11406	PMPCA	FALSE
Q11201	8.9454	0.786204	0.104465	Q11201	FALSE
Q12768	8.45789	0.670566	0.173558	WASHC5	FALSE
Q12769	5.41413	0.618402	0.208729	NUP160	FALSE
Q12770	11.1831	0.270677	0.567548	Q12770	FALSE
Q12772	5.3545	0.745323	0.127655	Q12772	FALSE
Q12788	6.27578	0.751899	0.123841	TBL3	FALSE
Q12797	5.60878	0.793929	0.100218	ASPH	FALSE
Q12830	5.02996	0.676846	0.16951	BPTF	FALSE
Q12834	5.67997	0.577378	0.23854	CDC20	FALSE
Q12846	14.3288	0.393287	0.405291	STX4	FALSE
Q12849	7.69185	0.697974	0.156161	GRSF1	FALSE
Q12874	3.34216	0.74758	0.126342	SF3A3	FALSE
Q12882	6.90906	0.669064	0.174532	DPYD	FALSE
Q12904-2	5.09476	0.632488	0.198948	Q12904-2	FALSE
Q12905	4.49916	0.619534	0.207935	ILF2	FALSE
Q12906-7	4.87289	0.425893	0.3707	Q12906-7	FALSE
Q12907	8.71758	0.0881328	1.05486	LMAN2	FALSE
Q12912	5.49527	0.943468	0.0252729	IRAG2	FALSE
Q12913	6.06422	0.901318	0.0451217	PTPRJ	FALSE
Q12931	6.54557	0.526688	0.278447	TRAP1	FALSE
Q12933-2	9.8636	0.806449	0.0934232	Q12933-2	FALSE
Q12965	7.1275	0.547533	0.261589	MYO1E	FALSE
Q12979	7.9961	0.685868	0.163759	ABR	FALSE
Q12981	6.31649	0.90675	0.0425123	Q12981	FALSE
Q12986	5.5458	0.68444	0.164664	NFX1	FALSE
Q12996	6.48984	0.775474	0.110433	CSTF3	FALSE
Q13011	6.20497	0.533251	0.273068	ECH1	FALSE
Q13043	4.80507	0.255115	0.593265	STK4	FALSE
Q13057-2	5.20567	0.703342	0.152834	Q13057-2	FALSE
Q13084	11.4435	0.185983	0.730526	Q13084	FALSE
Q13085-4	7.03386	0.858161	0.0664313	Q13085-4	FALSE
Q13094	5.98278	0.652424	0.18547	LCP2	FALSE
Q13098-7	8.29664	0.274488	0.561477	Q13098-7	FALSE
Q13107	4.18713	0.528493	0.27696	USP4	FALSE
Q13123	7.50653	0.77667	0.109763	IK	FALSE
Q13129	5.5364	0.814484	0.0891174	RLF	FALSE
Q13131-2	6.75632	0.892931	0.0491819	Q13131-2	FALSE
Q13136	8.89814	0.966432	0.0148289	PPFIA1	FALSE
Q13137-4	8.87869	0.39282	0.405807	Q13137-4	FALSE
Q13144	5.59347	0.657227	0.182284	EIF2B5	FALSE
Q13148	5.47533	0.668824	0.174688	TARDBP	FALSE
Q13151	5.84707	0.599586	0.222149	HNRNPA0	FALSE
Q13155	4.77347	0.753282	0.123043	AIMP2	FALSE
Q13162	6.74873	0.925138	0.0337933	PRDX4	FALSE
Q13177	4.40475	0.36074	0.442806	PAK2	FALSE
Q13185	7.87178	0.762148	0.117961	CBX3	FALSE
Q13190	5.28911	0.646881	0.189175	STX5	FALSE
Q13200	3.35069	0.492371	0.307707	PSMD2	FALSE
Q13206	4.64427	0.36408	0.438803	DDX10	FALSE
Q13217	5.93458	0.940485	0.0266482	DNAJC3	FALSE
Q13232	10.6514	0.165628	0.780867	NME3	FALSE
Q13242	5.9332	0.729865	0.136757	SRSF9	FALSE
Q13243	4.8985	0.532679	0.273534	SRSF5	FALSE
Q13247	7.86345	0.419132	0.377649	SRSF6	FALSE
Q13263	8.53774	0.678291	0.168584	TRIM28	FALSE
Q13277	6.59732	0.491336	0.308622	STX3	FALSE
Q13283	8.4793	0.423071	0.373586	G3BP1	FALSE
Q13287	10.5742	0.259057	0.586605	NMI	FALSE
Q13310-3	8.41811	0.490947	0.308966	Q13310-3	FALSE
Q13315	4.54201	0.782004	0.106791	ATM	FALSE
Q13347	5.2113	0.510703	0.291832	EIF3I	FALSE
Q13370	5.80453	0.644608	0.190705	PDE3B	FALSE
Q13393	10.6839	0.85933	0.0658398	Q13393	FALSE
Q13405	8.09918	0.212308	0.673034	MRPL49	FALSE
Q13418	6.17978	0.539184	0.268263	ILK	FALSE
Q13423	8.31092	0.21523	0.667098	NNT	FALSE
Q13425	8.66517	0.513267	0.289657	Q13425	FALSE
Q13427	7.21628	0.951787	0.0214601	PPIG	FALSE
Q13428-4	5.01135	0.348176	0.458201	Q13428-4	FALSE
Q13435	7.57501	0.708535	0.149639	SF3B2	FALSE
Q13442	4.19193	0.6239	0.204885	PDAP1	FALSE
Q13443	5.6861	0.589653	0.229404	Q13443	FALSE
Q13451	5.46856	0.733791	0.134428	FKBP5	FALSE
Q13459	8.00523	0.213646	0.670304	MYO9B	FALSE
Q13464	10.2235	0.966311	0.0148829	ROCK1	FALSE
Q13488	11.0953	0.463052	0.33437	TCIRG1	FALSE
Q13492	12.3543	0.0805108	1.09415	PICALM	FALSE
Q13496	10.633	0.410735	0.386438	MTM1	FALSE
Q13501	6.24607	0.648091	0.188364	SQSTM1	FALSE
Q13505	9.20523	0.196547	0.706533	MTX1	FALSE
Q13510-2	13.2917	0.255683	0.592298	Q13510-2	FALSE
Q13526	8.32815	0.390278	0.408626	PIN1	FALSE
Q13547	7.17478	0.43682	0.359697	HDAC1	FALSE
Q13557-8	5.80566	0.374916	0.426066	Q13557-8	FALSE
Q13561-2	8.04249	0.700462	0.154615	Q13561-2	FALSE
Q13563	6.5911	0.888909	0.0511427	Q13563	FALSE
Q13573	6.68789	0.398405	0.399675	SNW1	FALSE
Q13586	5.90161	0.769398	0.113849	STIM1	FALSE
Q13596	4.48034	0.402859	0.394847	SNX1	FALSE
Q13601	5.85552	0.299333	0.523846	KRR1	FALSE
Q13616	4.77332	0.447474	0.349232	CUL1	FALSE
Q13617-2	4.73081	0.539872	0.26771	Q13617-2	FALSE
Q13618	7.87233	0.805834	0.0937544	CUL3	FALSE
Q13619	7.21136	0.316524	0.499594	CUL4A	FALSE
Q13627-2	6.22246	0.486816	0.312635	Q13627-2	FALSE
Q13630	4.25157	0.614004	0.211829	GFUS	FALSE
Q13636	9.43402	0.178328	0.74878	Q13636	FALSE
Q13637	9.19852	0.268045	0.571793	RAB32	FALSE
Q13641	6.00755	0.600697	0.221345	Q13641	FALSE
Q13671	7.59526	0.841431	0.0749816	RIN1	FALSE
Q13724	6.0307	0.948062	0.0231633	MOGS	FALSE
Q13740-2	5.50895	0.336896	0.472504	Q13740-2	FALSE
Q13769	5.77083	0.434164	0.362346	THOC5	FALSE
Q13823	4.03178	0.787325	0.103846	GNL2	FALSE
Q13838-2	7.24159	0.520677	0.283432	Q13838-2	FALSE
Q13884	9.02483	0.270074	0.568517	SNTB1	FALSE
Q13895	9.11901	0.714531	0.145979	BYSL	FALSE
Q13907	4.43752	0.405213	0.392317	IDI1	FALSE
Q14008-3	4.17087	0.992743	0.00316296	Q14008-3	FALSE
Q14011	4.3261	0.450568	0.346239	CIRBP	FALSE
Q14019	4.86723	0.684069	0.1649	COTL1	FALSE
Q14055	13.7582	0.00117713	2.92917	COL9A2	TRUE
Q14088	9.36348	0.250005	0.602051	RAB33A	FALSE
Q14108	9.98776	0.38981	0.409147	SCARB2	FALSE
Q14118	6.22668	0.842899	0.0742246	DAG1	FALSE
Q14126	6.80589	0.829696	0.0810808	Q14126	FALSE
Q14137	9.14506	0.625183	0.203993	BOP1	FALSE
Q14139-2	5.45382	0.377989	0.422521	Q14139-2	FALSE
Q14141	4.08615	0.717939	0.143912	SEPTIN6	FALSE
Q14149	5.7208	0.887887	0.0516423	MORC3	FALSE
Q14152	7.04928	0.315535	0.500952	EIF3A	FALSE
Q14155-5	7.56287	0.84665	0.072296	Q14155-5	FALSE
Q14156	8.33026	0.981429	0.00814114	EFR3A	FALSE
Q14157-5	8.77237	0.576685	0.239061	Q14157-5	FALSE
Q14161	7.08941	0.918769	0.0367936	GIT2	FALSE
Q14165	7.74327	0.918217	0.0370548	MLEC	FALSE
Q14166	3.22677	0.469879	0.328014	TTLL12	FALSE
Q14168-4	9.22347	0.90398	0.0438414	Q14168-4	FALSE
Q14192	7.26733	0.924223	0.0342231	Q14192	FALSE
Q14197	10.2897	0.613948	0.211868	MRPL58	FALSE
Q14203	4.91564	0.70348	0.152748	Q14203	FALSE
Q14204	5.80345	0.835749	0.0779241	DYNC1H1	FALSE
Q14240-2	3.44501	0.476951	0.321526	Q14240-2	FALSE
Q14241	3.96658	0.128213	0.892067	ELOA	FALSE
Q14249	7.00168	0.912393	0.0398182	Q14249	FALSE
Q14254	7.95148	0.841528	0.0749315	FLOT2	FALSE
Q14257-2	7.70562	0.845469	0.0729025	Q14257-2	FALSE
Q14258	5.78218	0.657051	0.182401	TRIM25	FALSE
Q14289-2	5.31417	0.49504	0.30536	Q14289-2	FALSE
Q14331	6.75403	0.79507	0.0995947	FRG1	FALSE
Q14344	7.88483	0.833889	0.0788918	GNA13	FALSE
Q14393	8.26488	0.756092	0.121426	Q14393	FALSE
Q14444	10.3289	0.435616	0.360896	CAPRIN1	FALSE
Q14493	6.80175	0.972209	0.0122403	SLBP	FALSE
Q14498	4.42855	0.580261	0.236377	RBM39	FALSE
Q14517	6.30816	0.407023	0.390381	Q14517	FALSE
Q14554	6.98861	0.59418	0.226082	PDIA5	FALSE
Q14566	7.19323	0.218294	0.660958	MCM6	FALSE
Q14573	5.32517	0.520518	0.283564	Q14573	FALSE
Q14667	5.58454	0.328987	0.482822	Q14667	FALSE
Q14677	4.90742	0.340363	0.468058	Q14677	FALSE
Q14683	6.80065	0.849497	0.070838	SMC1A	FALSE
Q14690	4.42271	0.5752	0.240181	PDCD11	FALSE
Q14694-2	6.54331	0.65081	0.186546	Q14694-2	FALSE
Q14696	9.66778	0.702109	0.153596	MESD	FALSE
Q14699	7.41614	0.595833	0.224876	RFTN1	FALSE
Q14739	4.22101	0.436146	0.360368	LBR	FALSE
Q14764	6.65493	0.686557	0.163324	MVP	FALSE
Q14814-4	7.367	0.157725	0.802098	Q14814-4	FALSE
Q14839-2	5.40709	0.60202	0.220389	Q14839-2	FALSE
Q14847	4.65603	0.457973	0.33916	LASP1	FALSE
Q14914	5.73465	0.602069	0.220354	PTGR1	FALSE
Q14956	15.6617	0.064052	1.19347	Q14956	FALSE
Q14966	5.74275	0.789613	0.102586	ZNF638	FALSE
Q14974	3.76865	0.395515	0.402838	KPNB1	FALSE
Q14BN4	6.29433	0.52927	0.276323	Q14BN4	FALSE
Q14C86-6	4.42626	0.447328	0.349374	Q14C86-6	FALSE
Q15003	4.67523	0.64281	0.191917	NCAPH	FALSE
Q15005	6.80543	0.669558	0.174212	SPCS2	FALSE
Q15006	4.77801	0.349802	0.456178	Q15006	FALSE
Q15007	4.63075	0.500391	0.300691	WTAP	FALSE
Q15008	5.27865	0.851058	0.0700409	PSMD6	FALSE
Q15011	15.4902	0.280747	0.551685	Q15011	FALSE
Q15018	6.8338	0.958832	0.0182576	ABRAXAS2	FALSE
Q15021	5.10169	0.743173	0.12891	NCAPD2	FALSE
Q15022	6.58219	0.907805	0.0420076	SUZ12	FALSE
Q15024	4.34018	0.670066	0.173883	EXOSC7	FALSE
Q15029	5.10404	0.617028	0.209695	EFTUD2	FALSE
Q15031	7.69402	0.728731	0.137433	LARS2	FALSE
Q15035	6.08365	0.617907	0.209077	Q15035	FALSE
Q15042	5.24895	0.383989	0.415681	Q15042	FALSE
Q15043	12.4435	0.509204	0.293109	Q15043	FALSE
Q15046-2	5.1597	0.683056	0.165544	Q15046-2	FALSE
Q15050	6.35526	0.607043	0.216781	RRS1	FALSE
Q15052	6.1809	0.617186	0.209584	ARHGEF6	FALSE
Q15057	10.3496	0.488239	0.311367	ACAP2	FALSE
Q15059	6.79895	0.867641	0.0616599	BRD3	FALSE
Q15061	7.16331	0.758038	0.120309	WDR43	FALSE
Q15067-2	4.14383	0.689719	0.161328	Q15067-2	FALSE
Q15070	4.60901	0.73877	0.131491	OXA1L	FALSE
Q15075	3.81513	0.380221	0.419964	EEA1	FALSE
Q15080	5.62278	0.801916	0.095871	NCF4	FALSE
Q15084-2	5.80616	0.693982	0.158652	Q15084-2	FALSE
Q15102	3.41003	0.8392	0.0761346	PAFAH1B3	FALSE
Q15118	6.4436	0.581013	0.235814	PDK1	FALSE
Q15120-2	6.13082	0.755251	0.121909	Q15120-2	FALSE
Q15154	5.82157	0.61921	0.208162	PCM1	FALSE
Q15165	5.14156	0.676063	0.170013	PON2	FALSE
Q15181	5.0437	0.989756	0.00447179	PPA1	FALSE
Q15185	4.62356	0.934235	0.0295438	PTGES3	FALSE
Q15233	8.26384	0.605263	0.218056	NONO	FALSE
Q15262-3	7.5715	0.463057	0.334366	Q15262-3	FALSE
Q15274	5.70114	0.508018	0.294121	QPRT	FALSE
Q15286	6.96852	0.914219	0.03895	RAB35	FALSE
Q15287	5.68964	0.898291	0.0465829	RNPS1	FALSE
Q15293	8.27514	0.454708	0.342267	RCN1	FALSE
Q15311	6.94604	0.32619	0.486529	RALBP1	FALSE
Q15363	3.57701	0.346037	0.460877	TMED2	FALSE
Q15365	6.782	0.39807	0.400041	PCBP1	FALSE
Q15369	6.763	0.594675	0.22572	ELOC	FALSE
Q15382	2.18939	0.132189	0.878804	RHEB	FALSE
Q15392	5.0457	0.402849	0.394858	Q15392	FALSE
Q15393	4.27958	0.829957	0.0809443	SF3B3	FALSE
Q15397	6.69823	0.78313	0.106166	PUM3	FALSE
Q15404	4.37007	0.52294	0.281548	RSU1	FALSE
Q15418-2	7.59879	0.75772	0.120491	Q15418-2	FALSE
Q15424-3	3.79161	0.972719	0.0120125	Q15424-3	FALSE
Q15428	6.20455	0.641003	0.19314	SF3A2	FALSE
Q15435	6.72704	0.825471	0.0832982	PPP1R7	FALSE
Q15436	8.72255	0.66355	0.178126	SEC23A	FALSE
Q15437	7.64576	0.834059	0.0788034	SEC23B	FALSE
Q15459	4.09806	0.810756	0.0911098	SF3A1	FALSE
Q15477	6.48616	0.572216	0.24244	SKIC2	FALSE
Q15528	5.66515	0.389491	0.409502	Q15528	FALSE
Q15582	7.87583	0.760572	0.11886	TGFBI	FALSE
Q15599	7.32252	0.481736	0.31719	Q15599	FALSE
Q15629	6.43176	0.956469	0.019329	TRAM1	FALSE
Q15642	5.63298	0.662026	0.179125	Q15642	FALSE
Q15650	6.33442	0.903974	0.0438441	TRIP4	FALSE
Q15652	6.03259	0.252784	0.59725	JMJD1C	FALSE
Q15654	5.92951	0.536839	0.270156	TRIP6	FALSE
Q15691	5.17805	0.41826	0.378554	MAPRE1	FALSE
Q15717-2	6.92497	0.625217	0.203969	Q15717-2	FALSE
Q15738	4.85543	0.94585	0.0241778	NSDHL	FALSE
Q15758	8.9773	0.940707	0.0265456	SLC1A5	FALSE
Q15785	6.35543	0.575587	0.239889	TOMM34	FALSE
Q15818	4.83898	0.436318	0.360197	Q15818	FALSE
Q15833	5.41402	0.305999	0.51428	STXBP2	FALSE
Q15836	7.16557	0.65027	0.186906	VAMP3	FALSE
Q15843	7.87873	0.754989	0.122059	NEDD8	FALSE
Q15904	3.60045	0.212893	0.671839	ATP6AP1	FALSE
Q15910-2	9.05519	0.245371	0.610178	Q15910-2	FALSE
Q15942	5.53176	0.463978	0.333502	ZYX	FALSE
Q16134	5.32972	0.46339	0.334054	ETFDH	FALSE
Q16186	5.16438	0.576934	0.238874	ADRM1	FALSE
Q16270	5.24908	0.41893	0.377858	Q16270	FALSE
Q16512-2	5.30445	0.724502	0.139961	Q16512-2	FALSE
Q16513	8.48257	0.579283	0.237109	Q16513	FALSE
Q16531	3.86591	0.476436	0.321995	DDB1	FALSE
Q16537	6.5451	0.946294	0.0239738	Q16537	FALSE
Q16543	5.90934	0.634075	0.197859	CDC37	FALSE
Q16555	4.17055	0.674405	0.171079	DPYSL2	FALSE
Q16576	7.64771	0.55895	0.252627	RBBP7	FALSE
Q16584	5.24647	0.320441	0.494252	Q16584	FALSE
Q16595	7.65633	0.531583	0.274429	Q16595	FALSE
Q16610-4	5.09294	0.748228	0.125966	Q16610-4	FALSE
Q16611	5.2426	0.870164	0.0603988	BAK1	FALSE
Q16629	6.2788	0.159791	0.796449	SRSF7	FALSE
Q16630-2	8.25854	0.745272	0.127685	Q16630-2	FALSE
Q16637	10.075	0.688393	0.162163	SMN1	FALSE
Q16637	10.075	0.688393	0.162163	SMN2	FALSE
Q16658	5.04811	0.641507	0.192799	FSCN1	FALSE
Q16666	4.73496	0.816301	0.0881495	IFI16	FALSE
Q16698	8.45064	0.0869467	1.06075	DECR1	FALSE
Q16706	8.97564	0.252653	0.597475	MAN2A1	FALSE
Q16718	7.69588	0.284699	0.545614	NDUFA5	FALSE
Q16740	4.35993	0.727871	0.137946	CLPP	FALSE
Q16762	7.52716	0.478347	0.320257	TST	FALSE
Q16774-2	6.76963	0.625009	0.204114	Q16774-2	FALSE
Q16775	3.83807	0.20791	0.682125	Q16775	FALSE
Q16795	7.07167	0.535908	0.27091	NDUFA9	FALSE
Q16799	4.32174	0.371086	0.430525	RTN1	FALSE
Q16822	11.6058	0.00439426	2.35711	PCK2	TRUE
Q16836	8.21089	0.299044	0.524265	Q16836	FALSE
Q16850	5.67971	0.715689	0.145276	CYP51A1	FALSE
Q16851	3.73945	0.556633	0.254431	Q16851	FALSE
Q16854	6.30329	0.431655	0.364864	Q16854	FALSE
Q16881	5.98725	0.595642	0.225015	TXNRD1	FALSE
Q1KMD3	5.87157	0.717781	0.144008	HNRNPUL2	FALSE
Q27J81	6.94609	0.865489	0.0627382	INF2	FALSE
Q29RF7	10.4852	0.891026	0.0501098	PDS5A	FALSE
Q2M2I8	5.80842	0.459461	0.337751	AAK1	FALSE
Q2M389	8.62815	0.517204	0.286338	WASHC4	FALSE
Q2PPJ7	12.6951	0.00678413	2.16851	Q2PPJ7	TRUE
Q2T9J0	5.62281	0.324843	0.488326	Q2T9J0	FALSE
Q2TAY7	4.74022	0.362713	0.440437	SMU1	FALSE
Q32NB8	6.02788	0.48382	0.315316	Q32NB8	FALSE
Q32P28	7.80983	0.368054	0.434088	P3H1	FALSE
Q32P44	5.47635	0.337506	0.471719	EML3	FALSE
Q3KQU3-4	3.64245	0.701501	0.153972	Q3KQU3-4	FALSE
Q3KQV9	3.96508	0.7463	0.127087	UAP1L1	FALSE
Q3LXA3	4.36833	0.676705	0.1696	TKFC	FALSE
Q3MHD2-2	6.64736	0.796703	0.0987036	Q3MHD2-2	FALSE
Q3SY69	6.54165	0.770127	0.113437	ALDH1L2	FALSE
Q3ZCQ8-2	8.57659	0.125579	0.901084	Q3ZCQ8-2	FALSE
Q460N5	11.9498	0.189353	0.722727	PARP14	FALSE
Q49A26	6.79148	0.959193	0.018094	GLYR1	FALSE
Q4G0F5	11.2752	0.589114	0.229801	VPS26B	FALSE
Q4G0I0	8.18662	0.467288	0.330415	Q4G0I0	FALSE
Q4G0J3-3	8.31767	0.748733	0.125673	Q4G0J3-3	FALSE
Q4G0N4	5.1201	0.486566	0.312858	NADK2	FALSE
Q4G176	4.34316	0.614205	0.211687	ACSF3	FALSE
Q4KMP7	8.69861	0.875703	0.0576434	TBC1D10B	FALSE
Q4KMQ1	6.42059	0.508239	0.293932	TPRN	FALSE
Q4KMQ2-2	8.23193	0.767134	0.115129	Q4KMQ2-2	FALSE
Q4U2R6	6.48858	0.273033	0.563785	Q4U2R6	FALSE
Q4V328	3.42232	0.379369	0.420938	GRIPAP1	FALSE
Q4VC31	7.42014	0.847981	0.0716137	MIX23	FALSE
Q52LJ0-2	7.52814	0.947607	0.0233718	Q52LJ0-2	FALSE
Q53EP0	4.94662	0.692931	0.15931	Q53EP0	FALSE
Q53ET0	7.47743	0.946165	0.0240331	CRTC2	FALSE
Q53GL7	4.59658	0.862179	0.0644024	PARP10	FALSE
Q53GQ0	6.06777	0.833841	0.0789167	HSD17B12	FALSE
Q53GS7	4.42585	0.335722	0.47402	Q53GS7	FALSE
Q53GS9	4.22346	0.682796	0.165709	USP39	FALSE
Q53H12	9.69988	0.409945	0.387275	AGK	FALSE
Q53H82	6.7686	0.341583	0.466503	LACTB2	FALSE
Q53H96	7.38738	0.770977	0.112958	PYCR3	FALSE
Q53QZ3	3.57908	0.440248	0.356303	ARHGAP15	FALSE
Q53R41	8.13358	0.441033	0.355529	Q53R41	FALSE
Q53TN4	7.9175	0.352182	0.453232	Q53TN4	FALSE
Q567U6	13.4684	0.408772	0.388519	CCDC93	FALSE
Q56VL3	6.49208	0.568119	0.24556	OCIAD2	FALSE
Q5BJH7	5.92628	0.224533	0.648719	Q5BJH7	FALSE
Q5C9Z4	5.7679	0.533033	0.273246	NOM1	FALSE
Q5EBM0	8.10995	0.272848	0.564079	CMPK2	FALSE
Q5HYI8	6.68353	0.940986	0.0264169	RABL3	FALSE
Q5J8M3	4.42683	0.990329	0.0042207	EMC4	FALSE
Q5JRA6	6.11082	0.806598	0.0933427	MIA3	FALSE
Q5JRX3-2	8.19929	0.396141	0.40215	Q5JRX3-2	FALSE
Q5JSL3	5.58492	0.986603	0.0058576	DOCK11	FALSE
Q5JTD0	7.76111	0.620476	0.207275	Q5JTD0	FALSE
Q5JTH9	9.08216	0.230435	0.637452	RRP12	FALSE
Q5JTJ3-2	5.61731	0.513959	0.289072	Q5JTJ3-2	FALSE
Q5JTZ9	7.06363	0.226453	0.645022	AARS2	FALSE
Q5K4L6	6.33329	0.683388	0.165333	SLC27A3	FALSE
Q5K651	6.2713	0.433388	0.363123	SAMD9	FALSE
Q5M775	4.14091	0.315457	0.50106	SPECC1	FALSE
Q5NDL2	7.34112	0.760842	0.118706	Q5NDL2	FALSE
Q5QJE6	4.03615	0.795636	0.0992857	DNTTIP2	FALSE
Q5RKV6	11.1963	0.0847847	1.07168	EXOSC6	FALSE
Q5SNT2	6.58656	0.741441	0.129923	Q5SNT2	FALSE
Q5SSJ5	5.16339	0.659788	0.180596	HP1BP3	FALSE
Q5SW96	10.595	0.0165905	1.78014	Q5SW96	TRUE
Q5T011	8.5929	0.787265	0.103879	Q5T011	FALSE
Q5T160	6.57259	0.82142	0.0854345	RARS2	FALSE
Q5T1M5	7.90346	0.898792	0.0463407	FKBP15	FALSE
Q5T3I0-3	5.02162	0.448466	0.34827	Q5T3I0-3	FALSE
Q5T440	5.24223	0.733028	0.134879	IBA57	FALSE
Q5T4S7-2	2.14096	0.20021	0.698515	Q5T4S7-2	FALSE
Q5T5Y3-3	5.65323	0.839032	0.0762213	Q5T5Y3-3	FALSE
Q5T653	6.00863	0.863186	0.0638957	MRPL2	FALSE
Q5T6F2	8.83845	0.453993	0.342951	UBAP2	FALSE
Q5T8I3	4.22724	0.438252	0.358276	Q5T8I3	FALSE
Q5TBA9	7.54166	0.685141	0.16422	FRY	FALSE
Q5TC12	7.84724	0.860685	0.0651557	Q5TC12	FALSE
Q5THJ4	4.00453	0.326248	0.486452	Q5THJ4	FALSE
Q5TZA2	5.88946	0.669012	0.174566	Q5TZA2	FALSE
Q5U5X0	7.8014	0.430195	0.366335	LYRM7	FALSE
Q5UCC4	8.21632	0.0897221	1.0471	EMC10	FALSE
Q5UIP0	5.89016	0.970856	0.0128452	RIF1	FALSE
Q5VSL9	6.63413	0.80609	0.0936164	STRIP1	FALSE
Q5VST6	10.1139	0.728039	0.137845	Q5VST6	FALSE
Q5VT06	4.50123	0.732427	0.135236	Q5VT06	FALSE
Q5VTL8	6.47341	0.717073	0.144436	PRPF38B	FALSE
Q5VTR2	5.52086	0.902725	0.0444444	RNF20	FALSE
Q5VW32	5.98725	0.592716	0.227153	BROX	FALSE
Q5VW38	6.32817	0.522301	0.282079	Q5VW38	FALSE
Q5VYK3	4.48465	0.353606	0.45148	ECPAS	FALSE
Q5VZL5	5.02691	0.550025	0.259618	ZMYM4	FALSE
Q5W111	6.58318	0.419004	0.377782	Q5W111	FALSE
Q5XKK7	13.6792	0.489557	0.310197	Q5XKK7	FALSE
Q5XKP0	6.72267	0.323515	0.490105	Q5XKP0	FALSE
Q63HN8	6.62205	0.876739	0.0571296	Q63HN8	FALSE
Q641Q2	7.0164	0.983818	0.00708514	WASHC2A	FALSE
Q643R3	5.93073	0.886427	0.0523569	LPCAT4	FALSE
Q658P3-2	7.53793	0.347435	0.459126	Q658P3-2	FALSE
Q66K14	7.46201	0.971352	0.0126233	TBC1D9B	FALSE
Q66K74	5.00547	0.451712	0.345138	MAP1S	FALSE
Q66PJ3-2	5.49708	0.344339	0.463014	Q66PJ3-2	FALSE
Q68CP4	6.21148	0.968879	0.0137304	HGSNAT	FALSE
Q68CZ2	4.50639	0.205514	0.687159	TNS3	FALSE
Q68D91	5.97553	0.573818	0.241226	MBLAC2	FALSE
Q68DH5	9.98936	0.523103	0.281413	Q68DH5	FALSE
Q68E01-2	8.66759	0.189975	0.721304	Q68E01-2	FALSE
Q6BDS2	6.43834	0.842357	0.074504	BLTP3A	FALSE
Q6DD88	5.24366	0.881683	0.0546874	ATL3	FALSE
Q6FI81	5.38403	0.737472	0.132254	CIAPIN1	FALSE
Q6GMV3	6.58918	0.683666	0.165156	PTRHD1	FALSE
Q6GTX8	6.38735	0.288262	0.540213	LAIR1	FALSE
Q6IA17	5.17787	0.340341	0.468085	Q6IA17	FALSE
Q6IAA8	5.34968	0.598217	0.223141	LAMTOR1	FALSE
Q6IAN0	7.69252	0.778101	0.108964	DHRS7B	FALSE
Q6IC98	6.76271	0.744677	0.128032	GRAMD4	FALSE
Q6ICG6-2	6.00626	0.822276	0.0849824	Q6ICG6-2	FALSE
Q6IN84	5.22283	0.641536	0.192779	Q6IN84	FALSE
Q6IQ22	10.0046	0.0124837	1.90366	Q6IQ22	TRUE
Q6JBY9	6.15178	0.951277	0.021693	RCSD1	FALSE
Q6L8Q7	7.46523	0.924105	0.0342785	PDE12	FALSE
Q6NUK1	6.20678	0.329843	0.481693	SLC25A24	FALSE
Q6NUK4	6.30238	0.603144	0.219579	Q6NUK4	FALSE
Q6NUQ4	6.40078	0.921514	0.0354982	TMEM214	FALSE
Q6NVY1	9.15649	0.833915	0.078878	HIBCH	FALSE
Q6NXT6	6.6687	0.387692	0.411513	Q6NXT6	FALSE
Q6NYC8	4.9657	0.258247	0.587964	PPP1R18	FALSE
Q6P087	7.30597	0.858439	0.0662905	Q6P087	FALSE
Q6P161	10.2453	0.0595073	1.22543	Q6P161	FALSE
Q6P1J9	6.01207	0.57493	0.240385	CDC73	FALSE
Q6P1L8	6.8266	0.975898	0.0105957	MRPL14	FALSE
Q6P1M0	5.26408	0.962691	0.016513	Q6P1M0	FALSE
Q6P1N0	4.792	0.479528	0.319186	CC2D1A	FALSE
Q6P1X6	7.91644	0.382358	0.41753	Q6P1X6	FALSE
Q6P2E9	8.8138	0.638214	0.195034	EDC4	FALSE
Q6P2Q9	5.85004	0.837098	0.0772237	PRPF8	FALSE
Q6P444	7.06307	0.924722	0.0339888	Q6P444	FALSE
Q6P4Q7	11.8234	0.677084	0.169357	Q6P4Q7	FALSE
Q6PCB7	5.17327	0.88114	0.0549553	SLC27A1	FALSE
Q6PCB8	9.53509	0.507013	0.294981	EMB	FALSE
Q6PGP7	3.7636	0.479076	0.319596	SKIC3	FALSE
Q6PI48	7.48578	0.698883	0.155595	DARS2	FALSE
Q6PJF5-2	6.66791	0.508424	0.293774	Q6PJF5-2	FALSE
Q6PJW8	10.2562	0.0508204	1.29396	CNST	FALSE
Q6PK04	4.91162	0.243541	0.613427	CCDC137	FALSE
Q6PK18	5.26488	0.848835	0.0711766	Q6PK18	FALSE
Q6PKC3	6.30101	0.90181	0.0448852	Q6PKC3	FALSE
Q6PKG0	5.77784	0.893176	0.0490628	LARP1	FALSE
Q6PL18	6.03485	0.864371	0.0633	ATAD2	FALSE
Q6PML9	4.9596	0.58219	0.234935	SLC30A9	FALSE
Q6R327-3	6.55686	0.60806	0.216053	Q6R327-3	FALSE
Q6RW13	8.0137	0.661911	0.1792	Q6RW13	FALSE
Q6UB35	8.86501	0.108025	0.966474	MTHFD1L	FALSE
Q6ULP2	4.54997	0.32184	0.49236	AFTPH	FALSE
Q6UW68	6.20674	0.150257	0.823164	TMEM205	FALSE
Q6UWD8	6.12381	0.819058	0.0866854	Q6UWD8	FALSE
Q6UWP7	4.77736	0.628959	0.201378	LCLAT1	FALSE
Q6UWU4-2	7.38232	0.187347	0.727353	Q6UWU4-2	FALSE
Q6UWW8	11.8976	0.190391	0.720355	CES3	FALSE
Q6UX53	6.69234	0.348138	0.458248	TMT1B	FALSE
Q6UX71	4.94727	0.652844	0.185191	Q6UX71	FALSE
Q6UXD5-5	10.9047	0.699717	0.155077	Q6UXD5-5	FALSE
Q6UXH1-5	8.43989	0.849046	0.0710688	Q6UXH1-5	FALSE
Q6UXT9	7.48889	0.597406	0.22373	Q6UXT9	FALSE
Q6UXV4	7.47134	0.342194	0.465728	APOOL	FALSE
Q6WKZ4	8.3643	0.828642	0.081633	RAB11FIP1	FALSE
Q6XQN6	4.44584	0.683497	0.165263	NAPRT	FALSE
Q6Y1H2	8.46158	0.900711	0.0454148	Q6Y1H2	FALSE
Q6Y288	8.52634	0.809964	0.0915343	Q6Y288	FALSE
Q6Y2X3	9.95083	0.0236738	1.62573	Q6Y2X3	TRUE
Q6Y7W6	5.49384	0.695417	0.157755	GIGYF2	FALSE
Q6YHK3	6.78363	0.572696	0.242076	CD109	FALSE
Q6YN16	6.06558	0.744174	0.128326	HSDL2	FALSE
Q6YP21	7.02011	0.827947	0.0819972	KYAT3	FALSE
Q6ZMI0	7.50667	0.858279	0.0663713	PPP1R21	FALSE
Q6ZNB6	6.07285	0.912168	0.0399249	NFXL1	FALSE
Q6ZS17-4	4.75059	0.479474	0.319235	Q6ZS17-4	FALSE
Q6ZS81	4.89967	0.718421	0.143621	WDFY4	FALSE
Q6ZSR9	10.5134	0.0112115	1.95034	Q6ZSR9	TRUE
Q6ZSZ5	10.2056	0.22789	0.642275	ARHGEF18	FALSE
Q6ZT21	6.0143	0.795331	0.0994523	TMPPE	FALSE
Q6ZUJ8	6.40598	0.739531	0.131044	PIK3AP1	FALSE
Q709C8	8.9277	0.87015	0.060406	VPS13C	FALSE
Q70J99-3	8.21753	0.701977	0.153677	Q70J99-3	FALSE
Q70UQ0	5.40975	0.501244	0.299951	IKBIP	FALSE
Q70UQ0-4	5.36981	0.41242	0.38466	Q70UQ0-4	FALSE
Q7KYR7	7.34987	0.741896	0.129657	Q7KYR7	FALSE
Q7KZ85	4.00503	0.800048	0.0968839	SUPT6H	FALSE
Q7KZF4	5.43809	0.785862	0.104654	SND1	FALSE
Q7L014	3.57583	0.31454	0.502324	DDX46	FALSE
Q7L0J3	9.39599	0.284102	0.546525	Q7L0J3	FALSE
Q7L0Y3	8.63205	0.415011	0.38194	TRMT10C	FALSE
Q7L1Q6-3	6.32962	0.902991	0.0443165	Q7L1Q6-3	FALSE
Q7L1V2	10.1995	0.486716	0.312724	Q7L1V2	FALSE
Q7L1W4	6.26272	0.456612	0.340452	LRRC8D	FALSE
Q7L2E3-2	5.15512	0.416781	0.380093	Q7L2E3-2	FALSE
Q7L2H7	3.57359	0.531718	0.274319	EIF3M	FALSE
Q7L3T8	4.73451	0.72624	0.13892	Q7L3T8	FALSE
Q7L4I2	6.07433	0.738353	0.131736	RSRC2	FALSE
Q7L576	5.26583	0.68289	0.165649	CYFIP1	FALSE
Q7L591	8.70677	0.400322	0.39759	Q7L591	FALSE
[truncated: 1,310 more rows]
