# Supplementary material for: C-COMPASS: a user-friendly neural network tool profiles cell compartments at protein and lipid levels
Source: Nat Methods. 2025 Dec 4;23(1):118–30. doi: 10.1038/s41592-025-02880-3 (PMC12791020; doi:10.1038/s41592-025-02880-3)
Supplement: Supplementary file 25 — Humanized liver spatial proteomic statistics. [file 41592_2025_2880_MOESM25_ESM.xlsx]

## Sheet: E04_A_left
HFHF-fed
Identifier	fed_median_Fr.1	fed_median_Fr.2	fed_median_Fr.3	fed_median_Fr.4	fed_median_Fr.5	fed_median_Fr.6	fed_median_Fr.7	fed_median_Fr.8	fed_median_Fr.9	fed_median_Fr.10	fed_median_Fr.11	fed_median_Fr.12	fed_median_Fr.13	fed_median_Fr.14
A0A024QZ33;K7EK40;K7EMD8;K7ERM9;Q9H0G5	0	0	1	0	0.832577	0.463624	0.18257	0	0	0	0	0	0	0
A0A024QZW4;Q9H1N7	0	0	0	0	0	0.89215	1	0.508202	0	0	0	0	0	0
A0A024QZX5;A0A087X1N8;A0A2R8YD12;P35237	0.624791	1	0.351139	0.560082	0.394911	0.359482	0.285759	0.188224	0.125537	0.0969465	0	0	0.114587	0.167791
A0A024R3B9;E9PJL7;E9PNH7;E9PRA8;P02511	0.430688	1	0.492501	0.0726866	0.259131	0.475318	0.497065	0.0336953	0.0188796	0	0	0	0.169037	0
A0A024R3M2;A0A1B0GUD6;A0A1B0GWG7;A0A2R8Y5X2;J3KNL5;Q3KR37;Q3KR37-2;Q3KR37-3;Q3KR37-4
A0A024R4E5;Q00341	0.0103464	0	0.0357323	0.0611547	0.0587819	0.100579	0.11631	0.185176	0.311234	0.354745	0.755922	1	0.752444	0.418383
A0A024R571;Q9H4M9	0	0.752839	0.145164	0.515901	0.488991	0.680368	0.962034	0.745301	1	0.443443	0.514904	0.354165	0.429042	0.241213
A0A024R5I4;O94956	0.111307	0	0	0	0.136113	0.321905	0.418622	0.737543	0.789863	0.873769	0.824268	0.644738	0.547136	1
A0A024R6I7;P01009	0.695501	1	0.15583	0.0771763	0.215359	0.144668	0.267737	0.237891	0.274227	0.190323	0.109863	0.25771	0.0975937	0
A0A024R7E8;K7EMV4;K7EN05;K7EPC8;K7EQ44;P60002	0	0	0	0	0	0	0	1	0	0	0	0	0	0
A0A024R7W5;A0A087WY31;A0A087X0Q1;Q7Z739	0	0.651314	0.149564	0.2443	0.28845	0.396238	0.566082	0.66205	0.673148	0.643299	0.742364	0.928523	1	0.554794
A0A024RA52;P25787	0.374156	0.424181	1	0.731171	0.589581	0.389233	0.312412	0.187215	0.101382	0.0721464	0.00109205	0	0.0374472	0.0767879
A0A024RAC6;Q14241	0	0	0	0	0.235634	1	0.807478	0.137953	0.284075	0.0766805	0	0	0	0.342735
A0A024RBG1;Q9NZJ9-2	0.776609	1	0.452927	0.327303	0.312684	0.165599	0.164468	0.107456	0.0642465	0.038232	0.0321619	0.00596397	0	0.0206714
A0A024RCG2;Q96BI1	0.213779	0	0.0206026	0.136481	0.260739	0.413698	0.590277	1	0.890595	0.880347	0.615013	0.7889	0.54982	0.581736
A0A024RCN4;A0A087X2F1;B4DMT1;Q16670;Q16670-2	0	0	0	0	0	0	1	0	0.321458	0	0	0	0.335527	0.542119
A0A024RCQ8;A0A0G2JH76;A0A0G2JHB6;A0A0G2JIU6;A0A0G2JK02;A0A0G2JKR3;A0A0G2JLA3;A0A0G2JLL3;A0A140T8X7;A0A140T9Y1;G8JLL2;Q9UMR5;Q9UMR5-2;Q9UMR5-3	0.21091	0.0615771	0.097511	0	0	0.197023	0.714862	0.686528	1	0.652065	0.311757	0.393208	0.32052	0.505579
A0A024RCR6;A0A0G2JK23;P46379;P46379-2;P46379-3	0.524296	1	0.458781	0.32253	0.281623	0.234655	0.191429	0.0863014	0.0494603	0.0376611	0.00808814	0	0.0311756	0.0530844
A0A044PY82	0.214179	0.0917711	0.155721	0	0.111406	0.170428	0.1568	0.271809	0.564453	0.513281	0.703033	0.515316	0.616752	1
A0A067XG54;Q8NB49;Q8NB49-2;Q8NB49-3;Q8NB49-4	0	1	0.163257	0.147874	0.111467	0.283975	0.344338	0.345574	0.458832	0.296219	0.193249	0.196663	0.0974904	0.49299
A0A075B6F0;H7BXG6;M0R167;Q9H0D2;Q9H0D2-2	0	0	0	0	0.525234	0	0	0.776431	1	0.0377058	0	0	0	0
A0A075B6F9;Q9Y314	0.477553	1	0.46138	0.409367	0.346028	0.442831	0.357098	0.364381	0.10988	0.149795	0	0	0	0.295193
A0A075B6G3;A0A087WTU7;A0A087WV90;A0A5H1ZRP8;P11532;P11532-11;P11532-4	0.260841	0.297771	0.0196739	0.022612	0	0.100709	0.122521	0.35568	0.846775	0.885704	1	0.962388	0.514908	0.851189
A0A075B6U9
A0A075B6W5	0.179929	0	0	0.607531	0	0.449233	0.513328	0	0.399926	0.578538	0.132391	1	0	0.285574
A0A075B727;A0A075B728;P16284;P16284-2;P16284-3;P16284-4;P16284-5;P16284-6	0	0	0	0.451594	0.287057	1	0.674098	0.142688	0.906608	0	0	0	0	0
A0A075B730;P58107	0	0	0	0	0	0.126467	0	0.229853	0.370748	0.429076	0.155666	0	0.154753	1
A0A075B749;A0A087WX83;Q5VU43;Q5VU43-3;Q5VU43-4	0.160425	1	0.32485	0.476849	0.294802	0.360298	0.17144	0	0.120644	0.103137	0.0919411	0.26533	0.0310503	0.428663
A0A075B754;Q96QE3;Q96QE3-2	0.359684	1	0.0993422	0.3886	0.214436	0.198838	0	0	0.218841	0	0.251486	0	0.205495	0.630062
A0A075B773;K7ELY8;O00623	0	0	0	0	0	0	0	0	1	0	0	0	0	0
A0A075B784;E9PEW0;K7ELR5;Q8IXW9;Q9P275	0	0	0	0	0	0	0	0	0	0	0	0	0	1
A0A075B7B1;C9JIE4;O15061;O15061-2;O15061-3	1	0	0	0	0	0	0.447796	0	0	0.141793	0	0	0	0
A0A075B7B5;B7ZM87;O75044	1	0.990337	0.69927	0.508645	0.34782	0.249723	0.24059	0.30875	0.416089	0.290196	0.204736	0.0240119	0	0.194093
A0A075B7F1;S4R3C0	0	0	0	0.0959776	0	0	0	0.058761	0.123535	0.161028	0.690914	1	0	0.102457
A0A087WSV6;A0A087WSX8;A0A0B4J1W1;A0A0G2JLS4;A0A0G2JM99;A0A0G2JMY9;A0A0G2JNK9;A0A0G2JNM2;A0A0G2JNQ6;A0A0G2JNR3;A0A0G2JP64;A0A0G2JP80;A0A0G2JP96;A0A0G2JQ15;A0A0G2JQ44;A0A0G2JQ46;A8MVE2;D9IDM5;D9IDM6;F6RVM3;F6TER3;O75019;O75019-2;Q8N6C8;Q8N6C8-3;Q8NHL6;Q8NHL6-2;Q8NHL6-3;Q8NHL6-4;Q8NHL6-5	0	0	0	0	0.838812	0	0	0	1	0	0	0	0	0
A0A087WSW7;A0A0B4J1V9;F6XU50;Q9NRZ9;Q9NRZ9-2;Q9NRZ9-3;Q9NRZ9-4;Q9NRZ9-5;Q9NRZ9-6	0	0	0	0.812152	0.265599	0.319695	0	0	0.355531	0	1	0	0	0
A0A087WSW9;A0A087WSY9;Q16881;Q16881-3;Q16881-4	0.839394	1	0.669159	0.654125	0.483964	0.268741	0.2367	0.142813	0.0542357	0.060065	0.0360421	0	0.00945125	0.0226734
A0A087WSY5;Q96IY4	0.295106	0.41901	0.181943	0.0764621	0.121131	0.787589	1	0.943848	0.685688	0.542299	0.122493	0	0.27837	0.239151
A0A087WSZ7;A0A1B0GW84;D6RHE0;Q08493;Q08493-2;Q08493-3;Q08499;Q08499-10;Q08499-11;Q08499-2;Q08499-3;Q08499-4;Q08499-5;Q08499-6;Q08499-8;Q08499-9;Q32MM7	0	0	1	0	0	0	0	0	0	0	0	0	0	0
A0A087WT18;Q96A73;Q96A73-2	0	0	0	0	0	0	0	0	0	0.212243	0	0	1	0
A0A087WT20;Q9NV06	0	0	0	0	0	0	0	0	0.156587	0	0.0657212	0.0979475	0.0697751	1
A0A087WT23;A0A087WV67;O00124;O00124-3	0	0	0	0	0	0	0	0	1	0	0	0	0	0
A0A087WT30;J3KN91;Q8N5I9	0	1	0	0	0	0	0	0	0	0	0	0	0	0
A0A087WT34	0	0	0	0	0	0	0	0	0	1	0	0	0	0
A0A087WT44	0.208725	0.00675493	0	0.0408982	0.0744421	0.247383	1	0.676875	0.980023	0.556952	0.430102	0.450702	0.393825	0.31513
A0A087WT58;A6NES4	0	0	0	0	1	0	0	0	0	0	0	0	0	0
A0A087WT59;P02766	0.422242	0.571448	0	0.00881701	0.0274432	0.490929	0.93493	0.713059	1	0.719981	0.610942	0.887235	0.662893	0.443394
A0A087WT84;Q9H9V9;Q9H9V9-2
A0A087WT87;P43003;P43003-2
A0A087WT95;P49753	0.184332	0	0.117944	0.115636	0.0622385	0.0201069	0.0191025	0.0550985	0.0921037	0.155778	0.668374	0.67831	1	0.600595
A0A087WTA5;E7ERK9;Q9UI10;Q9UI10-2;Q9UI10-3	0.102085	0.275569	1	0.823987	0.403266	0.0806703	0	0.13099	0.240581	0.178312	0.101858	0.201914	0.102174	0.206683
A0A087WTA8;P08123	0.010572	0.017098	0	0.00199345	0.00300234	0.0061793	0.01386	0.147468	0.15607	0.283774	0.88825	0.387984	0.549639	1
A0A087WTE4;A0A087WTF6;A0A087WV75;A0A087WVU1;A0A087WWD4;A0A087WWJ5;A0A087WX77;A0A087WZS4;A0A087X1V2;A0A0D9SF98;H7BYX6;P13591;P13591-1;P13591-3;P13591-4
A0A087WTF0;A2A3K4;A2A3K4-2	0	0	0.120199	0	0.333245	0	1	0	0.354903	0.458153	0.0739778	0	0	0
A0A087WTG8	0	0	0	0	0	0	0	0	0	0	0	1	0	0
A0A087WTJ6;O14627;P47902;P47902-2;Q99626	0	1	0	0	0	0	0.56007	0	0	0	0	0	0	0
A0A087WTK0;A0A087WVC6;Q12913	0	0	0	0	0	0.222543	0.170503	0.748837	0.689624	0.566145	0.0950767	0.674966	0	1
A0A087WTM1;Q9Y6N7;Q9Y6N7-2;Q9Y6N7-3;Q9Y6N7-4;Q9Y6N7-5;Q9Y6N7-6	0.143984	0.00716845	0.0423444	0.119992	0	0.275344	0.340042	0.361444	0.655824	0.662159	0.553923	1	0.350369	0.700265
A0A087WTP3;Q92945	0.155207	1	0.139566	0.217265	0.272608	0.44739	0.263062	0.184251	0.0639601	0.0432114	0	0.037339	0.0887177	0.269841
A0A087WTQ2;A0A3B3IT47;C9JGR9;E7EQ49;Q9Y2I8;Q9Y2I8-2;Q9Y2I8-3	0	0.230962	1	0.695604	0.75677	0.215238	0.380867	0.424756	0.509306	0.401124	0.0426093	0.214104	0	0.285405
A0A087WTS0;H0YJK8;P18283	0.561836	1	0.476654	0.376696	0.307784	0.203198	0.157843	0.125154	0.0671836	0.0624222	0.0303207	0.0206212	0	0.0103593
A0A087WTT2;Q5JWB9;Q96A57;Q96A57-2	0.0663358	0	0	0	0	1	0.390114	0.925046	0.487896	0.489764	0	0	0	0
A0A087WTU3;Q9Y6I9	0.351571	0	0.0904202	0.0911707	0.198612	0.468403	0.826272	1	0.757662	0.582815	0.581705	0.584941	0.459503	0.445402
A0A087WTV6;A0A087WZR9;Q96C36	0	0	0	0	0	0	0	0	0	0	0	1	0	0
A0A087WTY4;P49454	0	0	0	0	0	0	1	0.0517293	0.880919	0	0	0	0	0
A0A087WTY7;Q9H227	0.981176	1	0.653242	0.484291	0.385509	0.164719	0.175074	0.0807676	0.0333058	0.0584239	0.0117409	0	0	0.109233
A0A087WTZ8;E5RFJ1;E5RHW9;E5RIM1;Q96MF7	0	0	0	0.00159238	0	0	0	0	0.166259	0.343606	1	0.990052	0.683204	0.339695
A0A087WU02;Q96RQ1	0	0	0.116145	0.260669	0.419337	0.846256	1	0.544485	0.358926	0.421829	0.271197	0.276304	0.180917	0.404401
A0A087WU05;A0A087WY48;Q8IY22;Q8IY22-2;Q8IY22-3	0	0	0.26798	1	0	0	0.172133	0	0	0	0	0	0	0
A0A087WU07;Q5TGZ0;Q5TGZ0-2	0	0	0	0	0	0	0	0.0243947	0.101445	0.157521	0.069041	1	0.875619	0.233921
A0A087WU25	0	0	0	0	0	0	0	0	0	0	0.250068	0.939684	1	0.431301
A0A087WU31;A0A0A0MTB7;E9PE15;P51790;P51790-2;P51790-4;P51790-5	0	0	0.161169	0.451044	0.43528	0.885227	0.98461	1	0.361869	0.404947	0	0	0	0.196876
A0A087WU37;A0A087WWG3;A0A087X140;A0A0A0MRU4;A0A0A6YYH9;C9J3G2;H0Y857;Q5JTY5;Q5JTY5-2;Q5RIA9;Q5RIA9-3;Q5RIB0;Q5RIB3;Q8IUF1;Q9BRT8;Q9BRT8-2;Q9BRT8-3	0	1	0	0.333533	0.684571	0	0	0.0898447	0	0.115672	0.398009	0	0.0525179	0.142078
A0A087WU46;A0A0A0MSL2;A0A0C4DGN9;B4DWF2;Q13422;Q13422-2;Q9UKS7;Q9UKS7-2;Q9UKS7-4;Q9UKS7-6;Q9UKT9;Q9UKT9-10;Q9UKT9-14;Q9UKT9-15;Q9UKT9-2;Q9UKT9-4;Q9UKT9-7;Q9UKT9-9	0	0	0	0	0	0	0	0	0	0	0	0	0	1
A0A087WU51	0	0	0	1	0	0	0.765477	0	0	0	0	0	0	0
A0A087WU53;Q9H0U3	0.0652984	0	0.0284303	0.0522795	0.0876467	0.218366	0.357738	0.57454	0.60228	0.56676	0.918937	1	0.740296	0.511234
A0A087WUB9;Q8WYA6;Q8WYA6-4	0.132616	0.332581	0.223427	0.215828	0.0970731	0.223089	0	0.188222	0.138216	0.24701	0.220096	0.381203	0.539145	1
A0A087WUC6;E9PI68;Q15005	0.0419062	0	0.0378903	0.0682638	0.134305	0.260579	0.369118	0.508711	0.656425	0.615995	0.734147	1	0.751044	0.628058
A0A087WUD3;Q9NRP0;Q9NRP0-2	0	0	0	0.0535493	0.0826198	0.150353	0	0.231304	0.237624	0.404633	0.310954	1	0.554181	0
A0A087WUE2	0	0	0.862175	1	0	0.500051	0	0	0	0	0	0	0	0
A0A087WUE4;A0A0G2JNN3;C9JMY0;Q96PV6;Q96PV6-1	0	0	0	0	0	0	0.124706	0.0711378	0.00800969	0	0	0	0	1
A0A087WUE6;A4PB68;Q3T8J9;Q3T8J9-2;Q3T8J9-3;Q9H869;Q9H869-2;Q9H869-3;Q9H869-4;Q9H869-5;Q9H869-6;Q9H869-7;Q9H869-8;Q9H869-9	0	0	0	0	0	0	0	0	0.432147	0.512769	0.999804	0	1	0
A0A087WUI6;Q8WXW3	0	0	0	0	0.101349	0.642412	1	0.37799	0.851842	0.505232	0.639168	0.177172	0.121858	0.208713
A0A087WUJ1;Q9H400;Q9H400-2	0.404726	0.568911	0	0.0679693	0	0.302767	0.376259	0.561574	0.596322	0.766537	0.817302	1	0.315898	0.841408
A0A087WUJ4;Q92618	0	0	0	0	0	0	0.34027	1	0	0	0	0	0	0
A0A087WUK2;O14979;O14979-2;O14979-3	0.0431896	0	0.0771901	0.0474848	0.110223	0.188396	0.136815	0.20863	0.257852	0.309619	0.377707	0.594192	0.321569	1
A0A087WUL2	0	0	0.735505	1	0.0471712	0.187463	0.0366271	0.0954596	0	0	0.0415079	0	0	0
A0A087WUL4;A0A087WX23;A0A087WZG9;B4DSP0	0	0	0.313308	0.34229	1	0.289572	0.44727	0.201773	0.1405	0	0	0	0	0
A0A087WUM5;Q5VZR0;Q9H4G4	0	0	0	0	0	0.160209	0	0.452891	1	0.86002	0.931908	0.371452	0.358821	0.194536
A0A087WUQ6;P07203	0.360866	1	0.224116	0.235944	0.167271	0.10276	0.0972609	0.0375788	0	0.033796	0.273607	0.436797	0.338378	0.0844414
A0A087WUT0;A0A0A0MR39	0	0	0	0	0.0238552	0.105298	0.110387	0.166615	0.173009	0.147216	0.228098	0.245365	0.320644	1
A0A087WUT6;O60841	0	0.0794883	0.607885	0.860611	0.86432	0.693037	0.549113	0.554665	0.542334	0.530342	0.484051	0.723455	1	0.980479
A0A087WUU8;M0R3J2
A0A087WUV7;A0A3B3IS76;A0A3B3ISL9;A0A3B3ISM6;A0A3B3ISX6;A0A3B3ITJ2;A0A3B3IUC8;P10746;Q5T3L9	0	0.900638	0	1	0.121336	0	0	0	0	0	0	0	0	0
A0A087WUV9	0	0	0	0	0	0	1	0	0	0	0	0	0	0
A0A087WUW6;A0A087X0G7;A0A087X1B1;Q9Y6K9;Q9Y6K9-2;Q9Y6K9-3	0	1	0	0	0	0	0	0	0	0	0	0	0	0
A0A087WUW9;Q9NXU5	0.681308	1	0.22763	0.316766	0.248405	0.309439	0.170459	0.303523	0.585202	0.0620722	0	0	0	0.438099
A0A087WUZ7;Q9Y5W8;Q9Y5W8-2	0	0	0	0.105341	0.141008	0.591998	0.647736	0.444092	1	0.742334	0.710251	0.345531	0.0660158	0.582343
A0A087WV01	0	0	0.18333	0.116938	0.152154	0	0.125362	0.075477	0.170118	0.288552	0.559523	1	0.65943	0.697215
A0A087WV05;Q99417	0.409692	1	0.229431	0.263004	0.294718	0.32713	0.171507	0.100336	0.0932704	0.10038	0	0.0016729	0.0566061	0.104277
A0A087WV24;P20711;P20711-3	0.73568	1	0.606077	0.515449	0.397023	0.213239	0.133807	0.106688	0.0290593	0.0738516	0.0485195	0	0	0.0657072
A0A087WV25;O95684;O95684-2	0.613092	1	0.108356	0.0359679	0.0246615	0	0.291941	0	0	0	0	0	0	0
A0A087WV39;Q92698;V9GYD3	0	0	0	0	0	0	0.333424	0	0	0.431486	0	0.475556	1	0
A0A087WV96	0	0	0	0	0	0	0	0.672572	1	0	0	0	0	0
A0A087WV97;Q8WU79;Q8WU79-2;Q8WU79-3	1	0.895868	0.512154	0.430301	0.36557	0.358345	0.299027	0.20369	0.141217	0.0768811	0.0392083	0.0412055	0	0.0930409
A0A087WVA1;P62341	0.0315433	0	0.0566489	0.111737	0.195827	0.540098	0.748193	1	0.942695	0.781695	0.712451	0.909222	0.69742	0.639571
A0A087WVA8;Q8IWB9;Q8IWB9-2	0.529768	1	0.0558375	0	0.147863	0.250453	0.617054	0.320811	0.154134	0.518427	0.148797	0.442294	0.0578964	0.198839
A0A087WVC1;Q9BQ39	0	0	0	0	0.223355	0.0270417	0.0972618	0.238423	0.142215	0.175991	0.207066	0.264883	0.254386	1
A0A087WVE2;O00602
A0A087WVF1;K7EQH1;Q96B23;Q96B23-2	0	0	0	0	0	0	0	0	0	0	1	0	0.186044	0.414427
A0A087WVF7;Q9NZM3;Q9NZM3-2	0.273972	1	0.0918425	0.0309566	0	0.198064	0.468488	0.82716	0.989532	0.982408	0.806776	0.859142	0.628225	0.684323
A0A087WVI0;E9PBL8;Q8WTW3	0.710264	1	0.911346	0.645331	0.69721	0.829039	0.627402	0.34269	0.181395	0.137681	0.0611451	0	0.187362	0.117185
A0A087WVM1;P78382;P78382-2;Q5W1L7	0	0	0	0	0	1	0.949123	0.207996	0	0	0	0	0	0
A0A087WVM4;B7ZM99	0.615533	0	0	0	0	0.188564	0.0291351	0.00849014	0.125998	0.293879	0.586963	1	0.670963	0.408262
A0A087WVP7;P0C024;P0C024-2	0.74592	1	0.409878	0.356803	0.178542	0.0380503	0	0.0841886	0.280739	0.324543	0.3857	0.510076	0.898414	0.104917
A0A087WVQ6;Q00610;Q00610-2	0.0360549	0	0.487374	0.72641	0.636697	1	0.795281	0.831032	0.743908	0.647429	0.4542	0.444874	0.211766	0.54279
A0A087WVS8;Q70IA6;Q70IA6-3	0.798476	1	0.735991	0.643126	0.572553	0.282164	0.256597	0.215123	0.108028	0	0	0	0	0
A0A087WVT6;A0A087X159;D6RAC5;P81877;P81877-2;P81877-3;P81877-4;P81877-5;Q9BWW4;Q9BWW4-2;Q9BWW4-3	0	0	0.210889	0.512507	1	0.799627	0.640413	0.516522	0.4324	0	0	0	0	0.326283
A0A087WVT8;A0A087X1L3;Q6ZWJ8	0	0	0	0	0	0	0	1	0	0	0	0	0	0.42484
A0A087WVX4;P49895;P49895-2;P49895-4	1	0	0.0388938	0.134765	0.169255	0.326253	0.453182	0.664452	0.641787	0.51958	0.503015	0.57741	0.356776	0.446951
A0A087WVX5;A0A1B0GTA9;A0A1B0GTF6;A0A1B0GTN8;A0A1B0GTP5;A0A1B0GTS4;A0A1B0GTX2;A0A1B0GU53;A0A1B0GUI8;A0A1B0GUK4;A0A1B0GVB2;A0A1B0GWF9;A0A1C7CYX2;A0A2R8Y555;A0A2U3TZM7;A0A494C0B2;A0A494C0Z9;A0A494C184;E7EN11;F8VNV8;F8VU10;F8VUW8;H0Y476;O00305;O00305-2;O00305-3;O00305-4;P54284;P54284-2;P54284-3;P54284-4;P54284-5;Q02641;Q02641-2;Q02641-3;Q08289;Q08289-10;Q08289-2;Q08289-3;Q08289-4;Q08289-5;Q08289-6;Q0…	0.0897329	0	0	0.091766	0.154242	0.743185	0.924653	0.213163	0.750303	1	0.671197	0.862414	0.227349	0.471341
A0A087WVZ7;A0A087X068;Q9UJW7;Q9UJW7-2	0	0	0.0895624	0	0.123144	0	0.639186	1	0.833272	0.36946	0.512518	0	0	0.382279
A0A087WVZ9;A0A0A0MQR7;P19388	0	0	0	0	0.199493	0.16704	0.497167	0.285213	0.225188	0.346207	0	0	0	1
A0A087WW00;C9J9H9;P51668;Q9Y2X8	1	0	0	0.370067	0	0	0	0	0	0	0	0	0	0
A0A087WW06;B0QYP5;Q96AY4	1	0	0.853378	0.254197	0.404953	0.531327	0.06025	0.396318	0	0	0	0	0	0.209318
A0A087WW23;P20292	0	0	0	0	0	0.037401	0.039467	0.151167	0.397745	0.360882	0.462513	0.705811	0	1
A0A087WW28	0	0	1	0.0665072	0.198105	0	0.221094	0	0	0.334736	0	0	0	0
A0A087WW48;E7ET14;H0Y3N9;H0Y589;O75151;Q9UPP1;Q9UPP1-2;Q9UPP1-3;Q9UPP1-4;Q9UPP1-5	0	0	0	0	0	1	0	0	0	0	0	0	0	0
A0A087WW58;Q9C0D9	0	0	0	0	0	0	0.740627	0.41759	1	0.9204	0.108543	0	0.127524	0.469263
A0A087WW59;Q7Z7L8	0.480248	1	0.251956	0.0606951	0.18054	0.120875	0.0229541	0.0399343	0	0	0	0	0	0
A0A087WW66;Q99460;Q99460-2	0.230509	0.243281	1	0.765011	0.555	0.423101	0.284776	0.174844	0.103411	0.0544101	0.00192628	0	0.0350183	0.15189
A0A087WW76;A0A1B0GTZ9;A0A1B0GV73;A0A452Q6Z5;H0Y468;Q5T5U3	0	0	0	0	0	0	0	0	1	0	0	0	0	0
A0A087WW77;Q15334	0.464076	0.159805	0.874708	1	0.653615	0.610466	0.389096	0.499602	0.501201	0.463518	0.226921	0	0.198495	0.295604
A0A087WW83;A0A087X0K8;Q6PRD1	0	0	0	0	0	0	1	0.364194	0	0	0	0	0	0
A0A087WWA3;O60333;O60333-2;O60333-4;Q4R9M9	0.769267	1	0.914357	0.795068	0.618431	0.45854	0.363344	0.250238	0.232391	0.131273	0.0228687	0.144942	0	0.0136882
A0A087WWA7;O14640;O14640-2;P54792;P54792-2	0	0	0	0.249281	0	0.62644	0.0850462	1	0.503306	0.16779	0	0	0	0
A0A087WWF6;F8W8R3;P49005	0.155998	0	0.827129	0.662456	0.352917	0.519408	0	0.607502	0.541487	0.506273	0.411128	0	0.489026	1
A0A087WWG5	0	0	0.0879741	0	0.170342	0.513072	0.944824	0.835464	0.898882	0.820328	0.436435	0.669505	0.512791	1
A0A087WWH3;Q9NZM4;Q9NZM4-2	0	0	0	0	0	0	0	0	0	0	0	0	0	1
A0A087WWI0	0.471008	1	0.347294	0.355709	0.411169	0.347415	0.322271	0.210573	0.20475	0.181506	0.152389	0	0.0461626	0.0422745
A0A087WWM0;O43617	0.77772	1	0.537009	0.619593	0.620253	0.631729	0.378192	0.275998	0.209339	0.219376	0.087461	0.114613	0.0440836	0
A0A087WWM4;H0YNJ6;Q9P2T1;Q9P2T1-2	0.760902	1	0.823834	0.709676	0.574529	0.387887	0.348694	0.189446	0.108704	0.055809	0.02262	0	0.0145627	0.0471581
A0A087WWM6;E7EQL6;O43272;O43272-1;O43272-2	0	0	0	0	0	0	0	0	0.0924804	0.227875	0.42393	1	0.477329	0.312346
A0A087WWP4;A0A494C001;A0A499FJY3;Q96T37;Q96T37-2;Q96T37-3;Q96T37-4	0.0543242	0	0	0.0566479	0.0387352	0.113273	0.200151	0.155976	0.182957	0.169299	0.241855	0.416404	0.383801	1
A0A087WWP5;Q12962	0	0	0	0	0	0	0	0	0	0	0	0	0	1
A0A087WWP8;A0A0C4DGT8;A0A0C4DH79;Q5VWQ0;Q5VWQ0-4	0	0	0	0	0	0	0	1	0	0	0	0	0	0
A0A087WWQ2;Q92979;V9GYP5	0	0	0	0.0772304	0	0	0	0.0419681	0.0609218	0	0	0.068092	0	1
A0A087WWR2;H3BQI4;H3BQS2;I3L2Z5;P56270;P56270-2;P56270-3;P56270-4	0.00122786	0	0	0	0	0	0.577513	0	0	0	0.386803	0	0	1
A0A087WWS1;Q96FV9	0	0	0	0	0	0.128629	0	0.160724	0.197555	0.333004	0.157726	0.42974	0.135747	1
A0A087WWT7;A0A1W2PRP3;Q7Z7M1	0	0	0	0	0	0	0	0	0	0.262353	1	0	0	0
A0A087WWU8	0.727855	0.897631	0.197594	0.201524	0.448575	0.455182	0.769179	1	0.707366	0.791578	0.798186	0	0.699738	0.53431
A0A087WWW9;O95999	0.490824	1	0.288715	0.336467	0.259313	0.244122	0.122607	0.115901	0.121056	0	0	0	0	0
A0A087WWY0;P08519	0.447888	0	0	0.0539501	0.0970317	0.253996	0.447315	0.73646	0.684234	0.691425	0.674815	1	0.613847	0.369064
A0A087WX02;F8WB74;M0QYX1;P63302	0	0.774978	1	0.592499	0	0	0	0	0	0	0	0	0	0
A0A087WX10;G3V4M2;G3V5E8;P54803	0	0	0	0.0454338	0.0962487	0.306016	0.181364	0.473753	0.336249	0.380078	0.421751	0.601563	0.469801	1
A0A087WX11;J3KNG8;Q8TF40;Q8TF40-3	1	0	0	0	1	0	0	0	0	0	0	0	0	0
A0A087WX19;A0A087WX45;C9J5R6	0	0	0	0	0.0696299	0.128742	0.173636	0.176663	0.199446	0.29336	0.679065	0.955495	0.954537	1
A0A087WX22;H3BVG2;Q2M296-3;Q2M296-4
A0A087WX80;A0A087WYF1;P24043	0.162295	0.069835	0.345669	0.129732	0.154458	0	0.1303	0.0594747	0.229362	0.319641	0.561354	0.755388	0.616773	1
A0A087WX97;Q9BXK5	0.557946	1	0.149106	0.0986772	0.116299	0.0528064	0	0.0554468	0.125341	0.216582	0.435941	0.827116	0.624727	0.263471
A0A087WX99;A0A0G2JRA4;P55283;P55283-2	0	0	0	0	0	0	0.699288	1	0.571604	0.680027	0	0	0	0
A0A087WXB0;O15126	0.221266	0	0.551215	0.573842	0.532596	1	0.731869	0.498431	0.450837	0.286025	0.269833	0.390439	0.19318	0.609717
A0A087WXB8;C9J0E2;C9J480;C9JWJ3;C9JXM2;Q9Y274	0	0	0	0	0	0	1	0	0	0	0	0	0	0
A0A087WXC5;E7ESZ7;O95299	0.0492736	0	0	0.0218198	0.0348195	0.0845897	0.0971785	0.19754	0.242523	0.303061	0.864257	1	0.558068	0.507405
A0A087WXD1;Q96T83	0	0	0	0.0964412	0	0.663289	0.812556	1	0.500994	0	0	0	0	0
A0A087WXF8;A0A087WYV3;A0A0D9SEW3;Q9NP64;Q9NP64-2;Q9NP64-3	0	0	0	0	0	0	0	0	0.842525	1	0	0	0	0
A0A087WXI2;Q9Y6R7	0	0	0	0	0	0	0	0	0	0	0	0	0	1
A0A087WXI5;P12830;P12830-2	0.199982	0.384428	0.0773926	0.00309853	0	0.0411252	0.346392	0.290873	0.594031	0.537428	0.632429	1	0.672932	0.709942
A0A087WXK4;Q7Z3F1	0	0	0	0	0	0.60451	1	0	0	0	0	0	0	0
A0A087WXL0;A0A087X1G7;A0A0J9YX89;A0A3B3IT39;A8MZD0;O60613;O60613-2	0	0	0	0	0	0.228459	0.274565	1	0.509514	0.537297	0.0594077	0.621061	0.254484	0
A0A087WXL6;B7Z879;Q9H270	0.0664724	0	0.765823	0.839258	0.816112	1	0.864466	0.804309	0.768265	0.64554	0.250478	0.459491	0.294788	0.430429
A0A087WXM6;A0A0A6YYL6;J3KRX5;J3QQT2;P18621;P18621-3	0.0247059	0	0.0867311	0.151103	0.181915	0.281148	0.29482	0.462032	0.520844	0.535196	0.91011	1	0.865066	0.559982
A0A087WXN9;Q765P7	0.451256	1	0.478504	0.342196	0.238151	0.397502	0.350852	0.154852	0.123289	0.0908171	0	0.303365	0.110304	0.189992
A0A087WXP0
A0A087WXS6;C9JBF1	0.414656	0	1	0	0.237711	0	0	0	0	0	0	0	0	0
A0A087WXU0;A0A2R8Y4J4;Q9NWS8;Q9NWS8-2	0.0224207	0	0	0.00850311	0.0128182	0.0351474	0.0457383	0.122802	0.19347	0.242759	0.67934	1	0.605906	0.614102
A0A087WXV4;P41235;P41235-2;P41235-4;P41235-5;P41235-6	0	0	0	0	0	0	0.0534935	0	0.117527	0.107133	0	0	0.0536377	1
A0A087WXW3;Q9Y3P8	0	1	0.235897	0	0	0	0	0	0.701841	0	0	0	0	0
A0A087WXW6;A0A140TA70;A0A140TA74;A9JR48;Q9BXA9;Q9BXA9-2;Q9BXA9-3;Q9BXA9-4	0	0	0	0	0.301637	0	0	0.241401	0.447715	0	0	0	0	1
A0A087WXX8	0	0	0	0	0	0	0	0	0.176594	0.296415	1	0.841587	0	0
A0A087WY00;F8W6H6;F8WE88;G3V394;Q9Y4I1;Q9Y4I1-2;Q9Y4I1-3	0	0	0	0	0	0	0	0	1	0	0	0	0	0
A0A087WY55;Q9NP79	0.764589	1	0.619632	0.513003	0.441103	0.27826	0.225176	0.212	0.105185	0.104989	0.0806189	0.0546677	0	0.0432031
A0A087WY67;P0CG29;P0CG30;Q6ICJ4	0.917717	1	0.520939	0.499812	0.341827	0.182107	0.0510674	0.105866	0.00848755	0	0	0	0	0
A0A087WY71;Q96CW1;Q96CW1-2	0.0355237	0	0.0795711	0.140246	0.0489949	0.123853	0.175435	0.45383	0.911495	0.783174	0.735605	0.737956	0.384057	1
A0A087WY85;A0A0A0MQU3;D6RAH7;D6RFM0;H9KV45;P61077;P61077-2;P61077-3;P62837;P62837-2	1	0.360073	0.504304	0.331524	0.470578	0.21543	0.247837	0.277011	0.104758	0.0915065	0.0286573	0	0.01275	0.0304622
A0A087WYA1;Q9UKN7	0	0	0	0	0	0	0	0	0	0	0	0.836409	1	0.126897
A0A087WYD6;A0A0G2JLV0;Q03519;X5CMH5	0	0	0	0	0.0425336	0.464462	0.61244	1	0.857594	0.837651	0.56274	0.677373	0.748104	0.492635
A0A087WYF2;F5H2F2;P54687;P54687-2;P54687-3;P54687-4;P54687-5
A0A087WYF7;Q6UXV4	0.0237965	0	0	0.0213722	0.00978896	0.0318744	0.0791154	0.161269	0.24958	0.365934	0.600923	1	0.76657	0.94384
A0A087WYJ2;M0QZR8;M0R2B7;P28340	0	0	0	0	0	0	0.288329	0.110342	0.0346295	0.0341026	0	0	0	1
A0A087WYL6;A0A087WZG6;A0A087X1S9;Q8TEW8;Q8TEW8-2;Q8TEW8-3;Q8TEW8-5;Q8TEW8-6;R4GN62
A0A087WYM1;C9JRR9;P42575;P42575-2;P42575-3	0	0	0	1	0	0	0	0	0	0	0	0	0	0
A0A087WYM3;A0A0A0MRF5;E7EWX6;Q8IXJ6;Q8IXJ6-2;Q8IXJ6-3;Q8IXJ6-4	1	0.787031	0.707798	0.496825	0.496106	0.231064	0.352001	0.369942	0.284936	0.139612	0.214291	0.0544757	0.345186	0
A0A087WYM5;A0A494C058;A0A494C075;A0A494C0M8;A0A494C171;A0A494C1C3;Q9BVV6;Q9BVV6-2;Q9BVV6-3;Q9BVV6-4	0	0	0	0	0	0	0	0	0	0.144836	0	1	0.350209	0.169926
A0A087WYN9;Q7Z478	0	1	0.224201	0.155549	0.110785	0.214567	0.220287	0.35416	0.468973	0.556621	0.595581	0.875832	0.762183	0.587011
A0A087WYP2;Q8IZQ5	0.57859	1	0.271034	0.262267	0.320003	0.259586	0.174945	0.158592	0.105792	0.226022	0.249971	0.0298737	0	0.259617
A0A087WYR0;P09132	0	0	0	0.119306	0.254102	0.629603	0.559021	0.777389	0.821663	1	0.739018	0.658185	0.884388	0.289809
A0A087WYS3;Q9ULU4;Q9ULU4-10;Q9ULU4-11;Q9ULU4-12;Q9ULU4-13;Q9ULU4-19;Q9ULU4-22;Q9ULU4-7;Q9ULU4-8;Q9ULU4-9	0.783564	1	0.631078	0.446462	0.479974	0.208448	0.181197	0.0796559	0.024093	0.0194197	0.0301671	0	0.0163052	0.113933
A0A087WYT3;Q15185;Q15185-4	0.881786	1	0.521374	0.473371	0.887385	0.440818	0.386544	0.187545	0.107027	0.0710937	0.076658	0.0140559	0.043648	0
A0A087WYV9;A0A087X1F5;P57105	0.0212973	0	0.0207666	0.0273143	0.0435259	0.0567673	0.114432	0.121045	0.227725	0.265856	0.587863	1	0.60751	0.33097
A0A087WYX8;A0A1W2PQW0;A0A590UJL7;A0A5F9ZH12;A0A5F9ZHT2;A0A6Q8PH73;Q14CM0	0	0	0	0	0	0	0	0	0	1	0	0	0	0
A0A087WYY0;A0A087X260;B1AKP7;G3V162;Q13148	0.079551	0.656675	0.095577	0.049857	0	0.0116452	0.123489	0.126309	0.119591	0.0913937	0.0691403	0.0578674	0.221565	1
A0A087WZ13;E9PAU2;Q8IY67;Q8IY67-2	0.802022	1	0.600137	0.569705	0.513021	0.412143	0.0881387	0.308521	0.121323	0	0.209318	0	0	0
A0A087WZ32;A8K727;Q9HB19	1	0.425125	0.599437	0.412932	0.270982	0.125614	0	0	0	0	0	0	0	0
A0A087WZ40;Q14244;Q14244-6;Q14244-7	0.433106	1	0.177501	0.127703	0.173974	0.105714	0.105714	0.0455315	0.0491605	0.0598743	0.0150929	0.0558091	0.0841215	0
A0A087WZ50;Q8TCT7;Q8TCT7-2;Q8TCT7-4	0	1	0	0.648201	0	0	0	0	0	0	0	0	0	0
A0A087WZ62;Q9H6U8;Q9H6U8-3	0	0	0	0	0	0.157102	0.442878	0.695384	0.865702	1	0.581813	0.92804	0.866621	0.503333
A0A087WZ97;A0A087WZK6;A0A087X2C2;Q5T7M9	0	0	0	0	0	0.905457	1	0.438967	0	0	0	0	0	0
A0A087WZB5	0.346977	0.115622	0.0422579	0.0350969	0.198129	0.170524	0	0.624148	0.85924	0.949498	0.861314	1	0.939089	0.764686
A0A087WZC1;Q6IN84;Q6IN84-2	0	0	0	0	0	0	0	0	0	0.200506	0.876129	1	0	0.846099
A0A087WZC2;A0A0C4DGS8;E0YMJ8;P35680;P35680-2;P35680-3;P35680-4	0	0	0	0	0	0	0.111652	0.0972601	0.200209	0	0	0	0.214865	1
A0A087WZE9	0	0	0	0	0	0	0	0	0	0.0233188	0	0	0	1
A0A087WZG4;A0A3B3IPE9;A0A590UK10;Q6ZSZ5;Q6ZSZ5-1;Q6ZSZ5-2;Q6ZSZ5-5;Q6ZSZ5-6	0.612969	1	0.399576	0.350936	0.313698	0.252589	0.221499	0.0630949	0.212915	0.0793605	0.0339249	0.24633	0	0.0693829
A0A087WZJ5	0	0	0	0	0	0	0	0	0.151817	0.611849	0.545621	0.251744	1	0
A0A087WZK0;M0R1T4;P49366;P49366-2;P49366-3	0	0	0	0	0	0	0.483458	0	1	0	0	0	0	0
A0A087WZK9;B3KS98;O15372	0.0178265	0	0.970005	1	0.793723	0.813979	0.681417	0.570555	0.489125	0.488571	0.390704	0.36788	0.408146	0.359698
A0A087WZM2;D6REQ6;D6RHI9;O00584	0	0	0	0.0857277	0.56239	0.713328	0.977097	0.917343	0.279255	0.127354	0	0.29625	0.19422	1
A0A087WZM8;Q8TBM7;Q8TBM7-2;Q8TBM7-3	0	0	0	0	0	0.511906	0.30764	0.904916	0.751151	1	0.285145	0	0.173423	0
A0A087WZN1;O43837	0.0611361	0.028497	0.0456635	0	0.0359984	0.00690301	0.005459	0.00953341	0.0426125	0.106317	0.53617	1	0.645453	0.408807
A0A087WZP9	0	0	0	0	0	0.336409	0.49332	0.814212	0.687681	0.880254	0.501157	0.497557	0.680869	1
A0A087WZQ7;Q9H115	0	0	0	0	0	0	0.646081	0	1	0.312088	0	0	0	0
A0A087WZT0;M0QY61;M0QZ22;M0R0X3;Q5PRF9	0.294737	0	0.569125	0.553672	0.203785	0.348133	1	0	0.297085	0.574048	0.191432	0	0	0
A0A087WZT2;Q6UX53	1	0	0.045286	0.0780892	0.138482	0.276108	0.356202	0.545979	0.38155	0.422797	0.401476	0.399719	0.372131	0.215492
A0A087WZT3;Q9H3K6	1	0.932572	0.279718	0.252361	0.620145	0.21155	0.963215	0.187324	0.065076	0	0.127434	0	0.128988	0
A0A087WZU2;E5RGN0;Q00536;Q00536-2;Q00536-3	0.720609	1	0.511444	0.523018	0.480308	0.328771	0.196023	0.153246	0.13044	0.0827022	0	0	0	0.0723206
A0A087WZU5;O43657	0	0	0.305816	0.764053	0.502601	0.93208	0.343425	1	0.489457	0.703439	0.42284	0.620509	0.0794872	0
A0A087WZV0;O43314	0.42849	0.546614	1	0.442547	0.495886	0.428951	0.139781	0.588139	0.195785	0.146026	0.206205	0	0.100902	0.48162
A0A087WZY2;A6NIV2;Q9P0U1
A0A087WZY5;A8MXH5;F5H3Q5;F5H851;Q14031;Q14031-2	0	0	0	0.188286	0.352351	1	0.896479	0.62274	0.186213	0.584044	0.252764	0	0.123545	0.0807112
A0A087X011;E9PES4;J3KPF9;Q9Y496	0.728172	0.787333	0.976194	1	0.648094	0.552533	0.692304	0.369559	0.48998	0.281336	0.144855	0	0	0
A0A087X020;Q9Y3A5	0.101547	0.232019	0.292029	0.761639	0.600006	1	0.58846	0.938593	0.654156	0.565448	0.399893	0.676747	0.523057	0
A0A087X080;A0A0U1RRH1;A0A0X1KG73;Q15413;Q15413-2;Q15413-3	0.974545	0	0.809207	0.767018	1	0.564866	0.208004	0	0.164389	0	0	0	0	0
A0A087X091	0.343085	0.886362	0	0.601949	0.316562	0.55208	1	0.257767	0	0	0.0709917	0	0	0
A0A087X0D5;P09668	0.90108	0	0.320521	0.418136	0.522839	0.9299	0.854661	1	0.777285	0.625662	0.438692	0.456608	0.499173	0.695614
A0A087X0F1;Q9UK61;Q9UK61-2;Q9UK61-3;Q9UK61-4	0	0	0	0	0	0	0	0	0.119257	0	0	0	0	1
A0A087X0H7;A0A669KAW5;A0A669KB51;A0A6E1W401;Q8NEL9;Q8NEL9-2;Q8NEL9-3;Q8NEL9-4
A0A087X0H8;Q15714;Q15714-2;Q15714-3	0.211879	1	0.199313	0.0752186	0.0423844	0.0550645	0.062544	0.00368283	0.0342512	0	0.00692632	0	0	0
A0A087X0H9;Q5T8P6	0	0	0	0	0.119036	0.132027	0.376775	0.162909	0.247336	0.216442	0.238083	0.37283	0.481395	1
A0A087X0K0;P39059	0	0	0	0	0	0	0	0	0.0852827	0	0.480216	0.739786	0	1
A0A087X0K4;Q7Z408;Q7Z408-2;Q7Z408-4	0	0	0	0	0	0	0	0	0.0244797	0.0172284	0	0.177541	0	1
A0A087X0K9	0	0	0	0	0.0614521	0.265486	0.270946	0.785292	0.999437	1	0.479739	0.513694	0.329202	0.972797
A0A087X0L7;E7EVY0;J3KNA0;Q15070;Q15070-2	0	0	0	0	0	0.0138324	0.0804387	0.0976106	0.199819	0.201948	0.710962	1	0.556728	0.553462
A0A087X0M4;Q9BWU0	0.665246	1	0.693658	0.426084	0.472925	0.451942	0.295185	0.224625	0.120867	0.130616	0.157974	0	0.10314	0.386193
A0A087X0P0	0	0	0	0	0	0	0.418854	0	1	0	0	0	0	0.284787
A0A087X0Q9;Q9BVL4	0.902355	1	0.453135	0.433224	0.288506	0.114726	0.102594	0.0275082	0	0.00118316	0.17446	0.428683	0.226432	0.133125
A0A087X0R6;Q9UMY4;Q9UMY4-1	0.802459	1	0.424756	0.341133	0.312801	0.235515	0.174084	0.0962447	0.0523996	0.0297807	0.0161166	0	0.0102446	0.0078925
A0A087X0R7;Q9H4L4	0	0	0	0	0	0.0617837	0.132856	0	0.348364	0.217135	0	0	0.327703	1
A0A087X0R9;B8ZZK1;Q07837;Q07837-2;Q07837-5;Q07837-6;Q07837-7	0	0	0	0	0	0.215036	0	0.62081	1	0.840883	0.283796	0	0	0
A0A087X0S5;P12109	0	0.46029	0.0896384	0.174601	0.198219	0.108002	0.0467744	0.129154	0.138567	0.275901	0.583373	0.746635	0.303685	1
A0A087X0T5;Q96AB6	0	0.969562	0.494935	0.369194	0.388826	0	1	0	0	0	0	0	0	0
A0A087X0V5;P29728;P29728-2	1	0.738738	0.249808	0	0.0491738	0.45715	0.581957	0.787491	0.802452	0.782891	0.549693	0.386152	0.0832037	0.493828
A0A087X0W8;Q04206;Q04206-2;Q04206-3;Q04206-4;Q2TAM5	0.848755	1	0.743851	0.648934	0.461745	0.236623	0.217066	0.111644	0.0945061	0.059374	0.0736319	0.149845	0.0290574	0
A0A087X0W9;Q8N6M0	0.518331	0.649744	1	0.551546	0.800631	0.440486	0.757218	0.294809	0.193303	0.0966084	0.144885	0	0.182335	0.0302584
A0A087X0X3;P52272;P52272-2	0	0.00730574	0.00477534	0.0273976	0.0547153	0.124625	0.150529	0.274078	0.209665	0.227671	0.20556	0.267521	0.27274	1
A0A087X0Y2;A0A087X248;A0A087X2I9;A0A096LPD8;F5GWV3;F5H3N7;F5H8B4;O14607;O14607-2;O14607-3;O14607-4;O14607-5	0	0	0	0	1	0.57777	0.379049	0	0	0	0	0	0	0.700397
A0A087X108	0.983838	1	0.57365	0.714421	0.49791	0.301683	0.20966	0.202777	0.127719	0.110302	0.0349678	0.0101107	0	0.0594644
A0A087X117;A0A0G2JN29;Q15155	0	0	0	0	0	0	0	0.308395	0.330566	0.560562	0.949884	1	0.393647	0.110072
A0A087X127
A0A087X138;Q8TF71	0	0	0	0	0	0	0	0.263868	1	0.574527	0.252665	0	0	0.277129
A0A087X1A8;A0A2R8Y3X7;D3VVH9;F5H211;G3V3R7;P54252;P54252-1;P54252-4	0.71318	1	0.700529	0.421158	0.353011	0.318109	0.260955	0.157953	0.101845	0.0913426	0.0888483	0	0	0
A0A087X1B2	0.464968	0.161539	0	0.0137177	0.036512	0.080413	0.194651	0.113105	0.167351	0.141596	0.135912	0.22132	0.172858	1
A0A087X1B6;E9PEG3;F5GZG9;P10275;P10275-3;P10275-4	0	1	0	0.0899249	0	0	0	0	0	0	0	0	0	0
A0A087X1D0	0	0	0	0	0	0	0	0	0	1	0	0	0	0.373141
A0A087X1E4;P53365;P53365-3	1	0.210103	0.0847829	0.070319	0.11182	0.185572	0.24605	0.0463464	0.0103995	0.0121342	0.00308547	0	0.00357985	0.00681581
A0A087X1G1;H7BYD0;Q16718;Q16718-2	0.0133312	0	0.0042237	0.00764051	0.00673362	0.0311937	0.0638383	0.134299	0.222699	0.30542	0.679384	1	0.836515	0.530565
A0A087X1G4	0	0	0	0	0	0	0	0	0	0	0	1	0	0.644627
A0A087X1J2	0	0	0	0	0	0	0	0	0.0352641	0.0349437	0.666241	1	0.895366	0.463476
A0A087X1J7;P22352	0.246305	0.13679	0	0.0805012	0.13648	0.0795374	0.202045	0.41197	0.808066	0.901656	1	0.741518	0.878353	0.464126
A0A087X1K1;Q96C00	0.493895	0	0	0	0.116176	0.119528	0.0843725	0.11724	0.152144	0	0	0	0.935692	1
A0A087X1N0;Q9H3C7	0	0	0	0	0	0	0	1	0	0	0	0	0	0
A0A087X1N3;F8WC38;O75818;O75818-2	0	0	0	0.200796	0.739843	0	0	0	0	0	1	0	0	0
A0A087X1N7;P20929;P20929-2;P20929-3;P20929-4	0	1	0	0	0	0.101746	0	0.150573	0	0	0	0	0	0
A0A087X1P3;C9IYE1;F8W8P5;H7BYR4;Q86UW7;Q86UW7-2;Q86UW7-3	0	0	1	0	0.772943	0	0	0	0	0	0	0	0	0
A0A087X1P5;J3KQ41;J3QT95;Q9H9Q2;Q9H9Q2-3	1	0.827834	0.636723	0.628007	0.877139	0.412544	0.358903	0.257636	0.275362	0.116306	0	0	0	0.389972
A0A087X1R3;A0A0C4DGX0;A6QL64;Q8N2N9	0.769564	0.721807	1	0.838648	0.513653	0.404433	0.356457	0	0.324973	0.232268	0	0	0.0979262	0
A0A087X1S3	0	0	0	0	0	0	0.0754811	1	0	0	0	0	0	0
A0A087X1U5;F5H7T0;F6RJM5;Q96S38;Q96S38-2	0	0	0	0	0	0	1	0	0	0	0	0	0	0
A0A087X1W8;A0A0A0MTJ8;Q9BY67;Q9BY67-3;Q9BY67-4;Q9BY67-5;X5DQS5	0.152349	0.0407784	0	0.0178668	0.0644389	0.145014	0.156685	0.334905	0.45687	0.518974	0.692827	1	0.416865	0.497598
A0A087X1Z1;A0A0G2JPW5;A0A0G2JQX1;A0A0G2JSA7;Q96RT8;Q96RT8-2	0	0	0	0	0	0	0	0	1	0	0	0	0	0
A0A087X1Z3;Q9UL46	0.579511	0.801971	1	0.866763	0.569286	0.386512	0.403345	0.202476	0.0779406	0.0602239	0	0.00854491	0.0523514	0.0593025
A0A087X236;A0A0A0MRE2;C9J2A8;Q9NVP4;Q9NVP4-2;Q9NVP4-3;Q9NVP4-4;Q9NVP4-5	0	0	0	0	0	0	0	0.0851429	0	0.375961	0.520997	0	1	0.0769402
A0A087X241;Q2NKQ1;Q2NKQ1-3;Q2NKQ1-4	0	0	0	0	0	0	1	0	0	0	0	0	0	0
A0A087X256;Q2M389	0.325216	0	0.390062	0.544509	0.612277	1	0.758391	0.542132	0.378816	0.293962	0.12874	0.0363631	0.0702285	0.349114
A0A087X266;Q9BXJ8	0	0	0	0	0.256112	0.538756	0.476782	0.654574	0.656049	0.528666	0.382901	1	0.345824	0.472367
A0A087X279;P09913	0.527302	1	0.84561	0.523959	0.507837	0.233748	0.362236	0.186482	0.155791	0.138328	0	0	0	0.235547
A0A087X283;A0A1B0GX65;B7Z306;C9J180;C9J2P0;H7C061;P51965;P51965-2;P51965-3;Q969T4;Q96LR5;R4GN77;R4GND1	0	0	0	1	0	0	0	0	0.418129	0	0	0	0	0
A0A087X294;O75914;O75914-2;O75914-3;O75914-4	0.741484	1	0.467103	0.390292	0.466488	0.297241	0.362593	0.165309	0.120159	0.0676288	0.0509301	0.0702838	0	0.0382436
A0A087X295;E9PDU5;Q9NNW5	0.802107	0.599981	1	0.890215	0.224007	0.124415	0	0	0.173523	0	0	0	0	0.229862
A0A087X296;P23219;P23219-2;P23219-3;P23219-4;P23219-5;P23219-6	0.0419641	0	0	0.0243811	0.0666267	0.153683	0.163243	0.313857	0.512046	0.52927	0.782566	0.921234	0.670019	1
A0A087X2A7;H0YBA5;H7BY63;Q8NB25;Q8NB25-2;Q8NB25-3;Q8NB25-4
A0A087X2B2;E9PMH5;Q13490;Q13490-2	0	0	0.948113	0.607012	0.413675	0	0	1	0	0	0	0	0	0
A0A087X2B5;P35613;P35613-2	0.0920886	0	0	0.0308048	0.0761994	0.206133	0.224706	0.473152	0.880982	1	0.958196	0.884079	0.498733	0.783138
A0A087X2D5;Q9BRJ2	0	0.0292727	0.0366566	0.0302963	0.0224717	0.0341336	0.111666	0.131661	0.200001	0.237969	0.540217	0.949377	0.614866	1
A0A087X2D8;O60271-2;O60271-4	1	0	0	0	0	0	0	0	0	0	0	0	0	0
A0A087X2G6;A0A0C4DGU5;D6RIC3;Q9Y3C1;Q9Y3C1-2;Q9Y3C1-3	0	0	0	0.154766	0.110679	0.161775	0.149558	0.281723	0.40752	0.293083	0.311174	0.518561	0.434274	1
A0A087X2I1;P62333	0.360663	0.616203	1	0.677883	0.647027	0.464189	0.345928	0.208851	0.0959056	0.0550955	0.0129511	0	0.0397052	0.0438044
A0A088AWN3;A0A0A0MSY4;Q9BZ29;Q9BZ29-3;Q9BZ29-4;Q9BZ29-5	0	0	0.0211318	0	0.00955792	0.0432971	0.0348099	0.0460978	0.076004	0.16269	0.496248	1	0.646145	0.429149
A0A088AWN8;E7EP87;E9PH27;J3KS48;J3KT43;J3QRB0;Q9UHQ1;Q9UHQ1-2;Q9UHQ1-3;Q9UHQ1-4	0	1	0	0.745755	0.44211	0	0	0	0	0	0	0	0	0
A0A088AWP2;A0A0C4DG41;A8MX39;A8MZ24;B5MDW0;P11308;P11308-1;P11308-2;P11308-3;P11308-5;P11308-6	0.880757	0	0	0	0	0	0	0	0	0	0	0	0	1
A0A088AWP5;E9PDC2;H7BZH9;Q8WUY3;Q8WUY3-2;Q8WUY3-3;Q8WUY3-4	0	0	1	0.899094	0	0	0	0	0	0	0	0	0	0
A0A090HNM7;A0A1W2PS85;P28715;R4GMW8	0.5217	0.51886	0	0.358712	0.276763	0.321866	0.61216	0.227606	0.238246	0.359516	1	0.776659	0.437008	0.64963
A0A096LNH6;Q14185	0.187813	0	0.779242	1	0.637584	0.708998	0.627884	0.601538	0.721498	0.451953	0.641787	0.669926	0.866746	0.884617
A0A096LNV3;A0A096LP02;Q9Y508;Q9Y508-2	0	0	0.152338	0.518552	1	0.455285	0.631624	0.256946	0.202978	0.147042	0.156097	0	0.168556	0
A0A096LP07;A0A096LPJ3;A8K070
A0A096LP22;A0A096LP34;C9J7Z1;Q86Y79	0	0	0	0	0	0	0	0	0.274278	0.10106	0.375571	1	0.964673	0.43405
A0A096LP69	0	0	0	0	0	0	0	0	0.221082	1	0	0	0	0
A0A096LPC5;A0A0A0MR88;Q9Y4E1;Q9Y4E1-1;Q9Y4E1-2;Q9Y4E1-6	0	0	0	0.301611	0.63516	1	0.353337	0.961062	0.435801	0.306599	0.099047	0	0	0
A0A096LPE2	1	0.217219	0	0.0538296	0.0652676	0.230734	0.424632	0.47805	0.308044	0.242352	0.250395	0.287053	0.281297	0.246247
A0A096LPI6	0.114107	0.132338	0.0133283	0	0.0323724	0.0107953	0.0057366	0.00438697	0.0515725	0.107452	0.528429	1	0.843743	0.475882
A0A096LPJ4;P05161	1	0.908809	0.910918	0.532698	0.30259	0.211941	0.279025	0.0648808	0.0221661	0	0.0486973	0.218236	0.131295	0.142711
A0A096LPJ9;A0A140G945;A0A140G945-2;E7EWH7;P02489	0.0925846	1	0.454188	0.152476	0.823163	0.208104	0.209454	0	0.078445	0	0	0	0	0
A0A0A0MQR2;Q9BY42	0.502287	1	0.271796	0.41602	0.205318	0.314079	0.195943	0.295343	0.220917	0.218493	0	0	0	0.171724
A0A0A0MQR4;I3L2J0;Q96RK0	0.468078	1	0.296705	0.121644	0.209892	0.17048	0.095511	0.0712036	0.0858165	0.182211	0.114264	0	0.34339	0.113217
A0A0A0MQS1;Q53H96;Q53H96-2	0.278677	1	0.86621	0.407016	0.388682	0.226988	0.200366	0.195235	0.116409	0.0852936	0	0.141586	0.0379488	0.00479105
A0A0A0MQS9;A0A0A0MTC7;Q16363;Q16363-2	0	0	0	0	0	0	0	0	0.27597	0.124802	0.180577	0.564409	0.152975	1
A0A0A0MQT0;P09455	0.727663	1	0.281991	0.20315	0.20426	0.10631	0.0792156	0.0457274	0.0190303	0.0220611	0	0.00316262	0.00842629	0.0388994
A0A0A0MQU0;Q9BV38;U3KQC1	0.146659	0	0.079983	0.0709829	0.067841	0.100609	0.0400829	0.0915401	0.105061	0.0952961	0.135021	0.222047	0.187452	1
A0A0A0MQU4;Q96I15	0.744306	1	0.600427	0.457911	0.399665	0.233715	0.203458	0.11673	0.0472625	0.0396569	0	3.28828e-05	0.0240775	0.0213627
A0A0A0MQU7;A0A0A0MTK8;F5H0K0;P20823;P20823-2;P20823-3;P20823-7;U3KQS6	0.0323719	0.527015	0.0177229	0	0.0134054	0.02894	0.0856671	0.0440385	0.172236	0.100231	0.110284	0.140445	0.387122	1
A0A0A0MQV6;P09038;P09038-1;P09038-2;P09038-3	0	0	0	0	0	0	0	0	1	0.586811	0	0	0	0.799255
A0A0A0MQV8
A0A0A0MQX1;D6RGD1;Q9HD67	0	0	0	0	0	0	0	0	1	0	0	0	0	0
A0A0A0MQX8;C9JP00;Q9NR56;Q9NR56-2;Q9NR56-5;Q9NR56-6;Q9NR56-7	0	0.300095	0.0477432	0.14873	0.277126	0.452459	0.605781	0.496667	0.355339	0.376196	0.338445	0.476807	0.559375	1
A0A0A0MQY7;A0A3B3ISH2;Q5VU97	0.982742	0	0.902618	1	0.249863	0.409164	0.202474	0.467792	0.759124	0.614383	0.250099	0.112068	0	0.35265
A0A0A0MR02;P45880;P45880-1;P45880-2	0.0291463	0	0.0277644	0.0390796	0.0447202	0.0738959	0.0779412	0.149649	0.236816	0.319586	0.831515	1	0.513358	0.369583
A0A0A0MR03;A0A0J9YWB6;A0A0J9YWJ4;K7EJD2;Q9Y5B0;Q9Y5B0-4	0.0496162	1	0.120537	0.190359	0.354386	0.211767	0	0.0431748	0	0	0	0	0	0
A0A0A0MR05;H3BM50;H3BN58;H3BPT1;H3BPU5;Q9BVC4;Q9BVC4-4;Q9BVC4-5	0.0324703	0	0.579305	0.471848	0.737116	0.471059	1	0.489143	0.215269	0.10882	0.106527	0.0818324	0.215871	0.106951
A0A0A0MR07;F5H5P4;P15498;P15498-2;Q96D37	0.910425	0	1	0.903424	0.376235	0.617285	0.111573	0	0	0	0	0	0	0
A0A0A0MR09;P43378	1	0.145676	0.0757574	0.072034	0.0517636	0.0711695	0.157737	0.251577	0.0332123	0.162038	0	0.443567	0.357227	0.0794828
A0A0A0MR11;A0A0A0MRS1;Q06730;Q06730-2;Q06730-3	0	0	1	0	0	0	0	0	0	0	0	0	0	0
A0A0A0MR25;A0A5S6RJB7;D2CGD1;E7EVR7;H7BXU9;H7C265;P21802;P21802-15;P21802-16;P21802-17;P21802-18;P21802-2;P21802-20;P21802-21;P21802-22;P21802-23;P21802-3;P21802-4;P21802-5;P21802-6;P21802-8;S4R381	0	0	0	0	0	0	0	0	0	1	0	0	0	0
A0A0A0MR36;Q9ULV0-2
A0A0A0MR51;H7C2V0;O60427	0	0	0	0	0	0	0	0.595448	1	0.588869	0	0.227587	0	0
A0A0A0MR67;A0A0A0MSA1;E9PDI6;F5GY28;F5H522;Q13936;Q13936-10;Q13936-11;Q13936-12;Q13936-13;Q13936-14;Q13936-15;Q13936-16;Q13936-17;Q13936-18;Q13936-19;Q13936-2;Q13936-20;Q13936-21;Q13936-22;Q13936-23;Q13936-24;Q13936-25;Q13936-26;Q13936-27;Q13936-28;Q13936-29;Q13936-3;Q13936-30;Q13936-31;Q13936-32;Q13936-33;Q13936-34;Q13936-35;Q13936-36;Q13936-37;Q13936-4;Q13936-5;Q13936-6;Q13936-7;Q13936-8;Q13936…	0	0	1	0.439924	0.635878	0	0	0	0	0	0	0	0	0
A0A0A0MR74;O75907	0	0	0	0	0	0.156157	0.435694	1	0.443518	0.623277	0.433033	0.179984	0	0
A0A0A0MR93;A0A0C4DH11;K7ELZ7;K7ES91;Q53F39;Q53F39-2;Q53F39-3
A0A0A0MRA5;B7Z4B8;M0R3F1;Q9BUJ2;Q9BUJ2-2;Q9BUJ2-4	0.626755	1	0.874979	0.592487	0.53757	0.242062	0.219052	0.151325	0.105266	0	0.0941237	0.0338032	0.166451	0.689384
A0A0A0MRA8;A8K968;Q9Y2J2;Q9Y2J2-2	0.234311	0.597231	0.104545	0	0.0170889	0.00260751	0.415059	0.415152	0.95186	0.811543	0.744347	0.766865	0.539657	1
A0A0A0MRB5;Q8WXG6;Q8WXG6-2;Q8WXG6-3;Q8WXG6-4;Q8WXG6-5;Q8WXG6-6;Q8WXG6-7;Q8WXG6-8	0.129556	1	0.427323	0.272433	0.273852	0.295671	0.110707	0	0	0	0	0	0	0
A0A0A0MRD0;A0A2R8YCE3;F5H4B4;F5H4B4-2	0.121549	0	1	0	0.593003	0.168549	0.60045	0.411236	0.0250526	0.113653	0.191779	0.0942467	0.0894255	0
A0A0A0MRE5;Q9ULH1;Q9ULH1-2	0.827379	1	0.310083	0.599747	0.2842	0.188076	0.269047	0.172283	0.399571	0.108872	0.241322	0.126195	0	0.84283
A0A0A0MRF6;Q99996;Q99996-1;Q99996-3;Q99996-5;Q99996-6	0.489416	1	0.748852	0.340612	0.270402	0.262076	0.567037	0.156918	0.105441	0.217558	0.0820394	0.219156	0.0894754	0
A0A0A0MRF9;P16885	0.784736	1	0.931587	0.736648	0.638624	0.397015	0.343833	0.297104	0.138239	0.265489	0	0	0.0165533	0.131011
A0A0A0MRG8;Q16611	0	0	0	0	0	0	0	0.074952	0.23773	0.449487	0.794314	1	0.481342	0.335315
A0A0A0MRG9;B1AMJ5;Q5JTU8;Q96SN8;Q96SN8-2;Q96SN8-3;Q96SN8-4	0	0	0	0	0	0	0	1	0	0	0	0	0	0
A0A0A0MRH3;Q9Y2W7;Q9Y2W7-2;Q9Y2W7-3	0	0	0	0	0.732395	0.307401	0.489041	0.112988	0.548605	0.316077	0	0	1	0.617931
A0A0A0MRI1;Q8IXQ4	0.299316	1	0.205717	0.177833	0.243951	0.160981	0.110495	0.0338047	0.071802	0.0233617	0.198901	0	0.132355	0.0176718
A0A0A0MRI2;Q9UNH7	0.946652	1	0.650579	0.802001	0.641647	0.633027	0.283569	0.415233	0.249253	0.255356	0.0829228	0	0.161523	0.0069726
A0A0A0MRJ0;Q5VT25;Q5VT25-2;Q5VT25-3;Q5VT25-4;Q5VT25-5;Q5VT25-6	0	0	0	0	0	0	0	0	0	0	1	0	0	0
A0A0A0MRJ6	0.528284	1	0.351223	0.236306	0.228063	0.141836	0.099649	0.0492432	0.0305794	0.0295265	0.040517	0.0556989	0.0234335	0
A0A0A0MRJ7;P12259	0.296941	0.445284	0	0.381091	0.23368	0.545323	0.649211	0.871351	1	0.810729	0.505464	0.466634	0.524468	0.45743
A0A0A0MRJ8;Q7Z6I6;Q7Z6I6-3	0	0	0	0	0	0	0	0	0	1	0	0	0	0
A0A0A0MRM2;Q86VF7;Q86VF7-2;Q86VF7-3;Q86VF7-4	0	0	0	0	0	1	0	0.694407	0	0	0	0	0	0
A0A0A0MRM9;Q14978;Q14978-2;Q14978-3	0.172448	0.302168	0	0.0200828	0.0171238	0.0452274	0.0733015	0.0206754	0.0432388	0.0535694	0.114082	0.335648	0.152929	1
A0A0A0MRP6;B7ZLQ5;P28370;P28370-2	0	0	0	0	0	0	0.183492	0	0.238251	0.297277	0.117181	0.148107	0	1
A0A0A0MRR7;P09234	0	0.021015	0.00707268	0.0568792	0.0696442	0.171899	0.118031	0.230848	0.173392	0.299142	0.253323	0.297051	0.306735	1
A0A0A0MRT2;Q9BTA9;Q9BTA9-2;Q9BTA9-5	0	0	0.979378	0	0	0.787454	1	0	0.360828	0	0	0	0.490797	0
A0A0A0MRT6;Q8IZP0;Q8IZP0-2;Q8IZP0-3;Q8IZP0-4;Q8IZP0-5;Q8IZP0-6;Q8IZP0-9	0	0.446948	0.105853	0.165139	0.312313	0.385218	0.620816	0.877563	1	0.464553	0.483715	0.243599	0.349096	0.137415
A0A0A0MRW6;Q9H6R4;Q9H6R4-2;Q9H6R4-4	0	0	0	0	0	0	0	0	0	0	0	0	0	1
A0A0A0MRX1;A0A0R4J2E6;A0A494C0F8;A0A494C147;A0A494C1D9;B1APY9;P26378;P26378-1;P26378-2;P26378-3;P26378-4;P26378-5;Q12926;Q12926-2	0.592891	0	0.616406	0.397964	0.378125	0.3689	0	0.676972	0.787549	1	0	0	0	0
A0A0A0MRX8;A0A1B0GWI9;A0A1B0GWJ4;A0A2R8Y7V8;O00712;O00712-4;O00712-5;Q5VW26;Q5VW27;Q5VW30;U3KQE8	0.0466399	0.0926933	0.0938791	0.0786688	0.114892	0.012593	0.0291931	0.051002	0.0718137	0.106144	0.116429	0.307446	0	1
A0A0A0MRY0;B0QYI1;Q8WUA7;Q8WUA7-2;Q8WUA7-3;Q8WUA7-4	0.916558	0.802103	0.984507	1	0.88343	0.531803	0.374458	0.388252	0.160153	0.0959689	0	0	0.0472306	0
A0A0A0MRZ1;Q9H9P5-1;Q9H9P5-3	1	0.514414	0.768462	0.383556	0.135554	0	0.286249	0	0.0627491	0	0	0	0	0
A0A0A0MRZ4;E7EMV7;Q15025;Q15025-2;Q15025-3;Q15025-4;Q15025-5;Q15025-6;Q15025-7;Q15025-8	0.297073	1	0.719344	0.550249	0.59672	0.655621	0.330994	0.374666	0.419941	0.0742899	0.0265818	0	0.111794	0
A0A0A0MS14	0.886153	0	1	0.457223	0	0	0	0	0	0	0	0	0	0
A0A0A0MS59;A0A0C4DFX4;Q6ZRS2;Q6ZRS2-2;Q6ZRS2-3	0	0	0	0	0	0	0	0	0	0	0	0	0.0776981	1
A0A0A0MS79;O14513	0	0.0911038	0	0	0	0	0	0.42122	0	0	0.111233	0	0	1
A0A0A0MS87	0.553421	1	0.255702	0.259487	0.226655	0.129312	0.138664	0.0349479	0.0310761	0.0168888	0.00782862	4.65738e-05	0	0.0228892
A0A0A0MS99;I3L4X2;P33527;P33527-2;P33527-3;P33527-5;P33527-9	0	0	0	0	0.0736683	0.140807	0	0.245638	1	0.682369	0.748101	0.0407758	0	0.129492
A0A0A0MSA9;A0A0C4DG49;P15151;P15151-2;P15151-3;P15151-4	0	0	0	0	0	0	0	0	1	0.48108	0	0	0	0
A0A0A0MSB4;Q6ZN50;Q969R2;Q969R2-2;Q969R2-3;Q969R2-6	0.758421	0	0	1	0	0	0.686201	0.496942	0	0.25727	0	0.510866	0	0.249376
A0A0A0MSB8;Q9UPT5;Q9UPT5-1;Q9UPT5-2;Q9UPT5-5;Q9UPT5-6	0	1	0.413822	0.639427	0.384718	0.241716	0.388013	0.290677	0.546479	0.616007	0.210654	0.411452	0.76063	0.198084
A0A0A0MSD0;Q4LDE5;Q4LDE5-3	0	0	0	0	0	0	1	0	0.294345	0.326086	0	0	0	0
A0A0A0MSE3;D3DNG8;P30556	0	0	0	0	0	0	0.44552	0.749211	1	0.487327	0.31717	0.261109	0	0.706676
A0A0A0MSG0;A6NGB9	0.371306	1	0	0.185235	0	0.0616808	0.0646077	0.0497616	0	0.0328115	0	0	0	0
A0A0A0MSH9;A0A494C1F7;A0A494C1P7;Q86WJ1;Q86WJ1-2;Q86WJ1-4	0	0	0.387025	0.397088	0	0.428841	0.353004	0.522232	0.356623	0.359219	0	0	0	1
A0A0A0MSI2;B3KPJ4;Q8IXK0;Q8IXK0-2;Q8IXK0-3;Q8IXK0-4;Q8IXK0-5	0.831871	1	0.424809	0.254299	0.439972	0.224673	0.0745216	0.137087	0.0511629	0.0555482	0.0283508	0	0.0620763	0.0967853
A0A0A0MSI6;B7Z1P2;Q9H4M3;Q9H4M3-2	0	0	0	0.807301	1	0	0	0	0	0	0	0	0	0
A0A0A0MSI8;O00471	0.820704	0.506565	0.3736	0.542489	0.248804	0.174344	0	0.128194	0.253031	0.334861	0.641353	1	0.561954	0.878593
A0A0A0MSJ9;Q15283;Q15283-2	0	0	0.303349	0.198707	0.173048	0	0	0.136992	1	0.306556	0.0313479	0	0	0
A0A0A0MSK3;A0A0C4DH47;A0A498U6I9;C9JS68;P24557;P24557-2;P24557-3;P24557-4;Q53F23	0	0	0	0	0	0	0.420472	0	0.160633	0	0	1	0	0
A0A0A0MSK6;Q13017;Q13017-2	0.59686	1	0.732095	0.659893	0.560522	0.479787	0.539343	0.48829	0.59558	0.485411	0	0.171301	0.3154	0.495388
A0A0A0MSL1;Q8TDM6;Q8TDM6-2;Q8TDM6-3;Q8TDM6-4	0	0	0	0	0	0	1	0	0	0.938008	0	0	0	0
A0A0A0MSM0	0.132889	0.142844	0.674752	0.630038	0.585392	0.555159	1	0.0782952	0.545986	0.16276	0	0.453003	0.336325	0.532575
A0A0A0MSP4;Q86WC4	0	0	0	0	0.0719414	0.445251	0.606742	1	0.413047	0.316009	0	0	0	0
A0A0A0MSQ0;P13797;P13797-2	0.755792	1	0.531253	0.542194	0.252127	0.130967	0.0852968	0.154653	0.268964	0.180234	0.146363	0.100224	0.197613	0
A0A0A0MSS0;P60880	0	0	0	0	0.0675783	0.0818335	0.387587	0.498471	0.636537	1	0.831765	0.685615	0.381434	0.475954
A0A0A0MSS7	0	0	0	0	0	0	0	0	0.45837	0	1	0	0	0.916524
A0A0A0MSS8;P42330	0.809174	1	0.536794	0.489407	0.330668	0.174867	0.176926	0.100954	0.0430058	0.0377267	0.0132774	0	0.0100584	0.0400461
A0A0A0MST8;C9JRP1;E9PFN4;Q9Y6M7;Q9Y6M7-12;Q9Y6M7-13;Q9Y6M7-2;Q9Y6M7-6;Q9Y6M7-7;Q9Y6M7-8;Q9Y6M7-9	0	0	0	0	0	0	0	0	0.360775	0.584495	0.109853	1	0	0
A0A0A0MSU4;O94911-3	0	0	0.293956	0.256987	0.3592	0.551996	0.395019	0.703715	0.871594	0.861627	0.829493	0.633326	0.418227	1
A0A0A0MSV9;A0A0G2JH37;A0A0G2JKZ1;A2AB90;O15533;O15533-2;O15533-3	0	0	0	0	0.103211	0.331433	0.969127	0.987898	1	0.660677	0.769411	0.897593	0.608279	0.666082
A0A0A0MSW2;E9PEI2;Q9BQW3;Q9BQW3-1
A0A0A0MSX9;P41252	0.064421	0.1051	1	0.772364	0.562245	0.393135	0.184118	0.138784	0.0415928	0.0523874	0.0380333	0	0.00367386	0.0711582
A0A0A0MSY7;O00142;O00142-4;O00142-6	0.123043	0.0286437	0	0.0356269	0.0635341	0.0650328	0.134742	0.0653872	0.082418	0.178145	0.785336	1	0.732836	0.403566
A0A0A0MSZ9;Q05048	0.00230236	0.118055	0.0712314	0.0465592	0.0729107	0.00215354	0.0736209	0	0.0811087	0.00512985	0.0505241	0.024064	0.164288	1
A0A0A0MT02;A2ABK4;P18615;P18615-3	0.00224035	1	0.0686173	0.152465	0.235595	0.398792	0.391606	0.486979	0.274479	0.281995	0	0.391387	0.426508	0.335564
A0A0A0MT16;Q86UQ4;Q86UQ4-3;Q86UQ4-4	0	0	0	0	0.123865	0	0	0.485915	0.495585	1	0.322149	0	0.400011	0
A0A0A0MT32;P38571;P38571-2	0.485806	0	0.0673654	0.096536	0.152194	0.308436	0.3645	0.46609	0.323631	0.254479	0.361696	0.435747	0.449938	1
A0A0A0MT35;A0A2P0CTB1;Q8TBF2;Q8TBF2-3	0.926221	1	0.558828	0.462477	0.372702	0.208479	0.233555	0.0459961	0	0.00551367	0.300998	0.468399	0.220084	0.108422
A0A0A0MT61;G5E979;H7BYM2;Q8WYN0;Q8WYN0-3;Q8WYN0-5	0.40122	1	0.226611	0.154432	0.185998	0.0579772	0.0408501	0.0422223	0.752749	0.857572	0	0.555377	0.6211	0.139896
A0A0A0MT72;C9JUH3;Q9BSQ5;Q9BSQ5-2;Q9BSQ5-3	0	0.298993	0.354949	0.451805	0.607917	0.299336	1	0.417566	0.466892	0.581728	0.170106	0	0	0
A0A0A0MT83;P26440	0.0843674	0.0612855	0.0307569	0.00468322	0.0305307	0	0.0302262	0.00240707	0.0394542	0.0908036	0.490162	0.999512	1	0.646278
A0A0A0MT93	0	0	0	0	0	0	0	0	0	0.549135	0	0	0	1
A0A0A0MTC2;D6RA37;D6RDV0;D6RIY7;Q13454;Q13454-2	0	0	0	0	0	0.170611	0.396446	0.487104	0.501994	0.460111	0.677879	1	0.582274	0.76419
A0A0A0MTG5;P13232;P13232-2;Q5FBX5	0	0	0	0	0	0	0	0	1	0	0	0	0	0
A0A0A0MTH2;A0A0A0MTK6
A0A0A0MTH3	0	0.107749	0.11985	0.216225	0.231446	0.252759	0.380394	0.611	0.891371	0.762086	0.813578	0.843229	1	0.717838
A0A0A0MTH9;O14981	0.365981	0.318365	1	0.738439	0.876054	0.609239	0.568349	0.441628	0.145145	0.102349	0	0	0	0.634346
A0A0A0MTJ9;Q6PIU2;Q6PIU2-2	0	0	0	0.0496854	0.0464914	0.355941	0.668267	1	0.95213	0.891961	0.914342	0.995334	0.61147	0.654815
A0A0A0MTK0;A0A0A0MTP0;F5GWB1;Q7Z6B0;Q7Z6B0-2	0.204102	1	0.147418	0.264558	0.187486	0	0.0538395	0	0	0	0	0	0	0
A0A0A0MTK4;A0A1B0GTZ1;Q8NB59;Q8NB59-2;Q8NB59-3;Q8NB59-5;Q8NB59-6;Q8NB59-7
A0A0A0MTL6;Q6ZS17;Q6ZS17-2;Q6ZS17-3;Q6ZS17-4	0.641502	0	1	0.559159	0.681604	0.649518	0.341864	0.317448	0.635993	0.28601	0.0408088	0	0	0
A0A0A0MTL7;A0A0D9SGH8;C6ZRJ6;C6ZRJ7;C6ZRK5;E2GH26;Q5JRY3;Q5JRY4;Q5JRY5;Q5VVR7;Q9NQB0;Q9NQB0-10;Q9NQB0-11;Q9NQB0-12;Q9NQB0-13;Q9NQB0-14;Q9NQB0-15;Q9NQB0-16;Q9NQB0-17;Q9NQB0-2;Q9NQB0-3;Q9NQB0-4;Q9NQB0-5;Q9NQB0-6;Q9NQB0-7;Q9NQB0-8;Q9NQB0-9	0	0	0	0	0	0	0	0	0.414797	0	0.330563	1	0.317258	0.839998
A0A0A0MTN0;Q13617;Q13617-2	0.623094	0.923886	1	0.81176	0.555675	0.359769	0.165737	0.186691	0.000206052	0	0.0114817	0.077968	0.0061106	0.0249861
A0A0A0MTN3	0.69959	1	0.152572	0.421852	0.0567057	0.0508884	0.034192	0	0	0	0	0	0	0
A0A0A0MTP7;F8VXG7;Q99590;Q99590-2	0.148002	0.570242	0.0264713	0.137261	0.273723	0	0.256031	0.0136396	0.019647	0.107646	0.224085	0.284216	0.903477	1
A0A0A0MTQ3;Q96N23;Q96N23-2	0	0	0.0526188	0	0	0	0	0.0136058	0	0.120856	0	0.226473	1	0.695331
A0A0A0MTQ8;P0C221	0	0	0	0	0	0	0.586797	0.376246	0	0.298354	1	0.877173	0	0.690797
A0A0A0MTR7;Q63HN8	0	0.167493	0.629668	1	0.914034	0.831728	0.61485	0.48164	0.354838	0.307185	0.154083	0.155251	0.250511	0.232849
A0A0A0MTS7;Q8WZ42;Q8WZ42-12;Q8WZ42-13;Q8WZ42-2;Q8WZ42-8	0.16893	0.236348	0.092425	0.0210986	0.0174352	0	0.0752117	0.00542885	0.0515297	0.0420329	0.256526	1	0.721716	0.477828
A0A0A0MTS9;K7EKZ0;K7EP24;K7ER94;Q2V2M9;Q2V2M9-2;Q2V2M9-3;Q2V2M9-4	0	0	0	0	0	0	0	0	0.705645	0	0	0	0	1
A0A0A0MTU3;Q4ZIN3;Q4ZIN3-2	0	0	0	0	0.121674	0.499198	0.582841	1	0.634265	0.527333	0.469478	0.366806	0.321735	0.334704
A0A0A6YYA0;Q86XR7-2;Q9Y3B3;Q9Y3B3-2	0.0937575	0	0.073191	0.218282	0.233751	0.811565	1	0.460811	0.352961	0.261792	0.264996	0.271648	0.202585	0.314669
A0A0A6YYC0;E9PJN1;O75676;O75676-2	0	0.673212	0.65761	1	0.547686	0.0674639	0.121989	0.343176	0	0	0	0	0	0
A0A0A6YYC7;Q96JP5;Q96JP5-2	0.870315	1	0.9115	0.642842	0.561988	0.461408	0.632872	0.176648	0.340602	0.284885	0.0530892	0	0.0540637	0.314047
A0A0A6YYG9;F8WCF6;F8WDD7;P59998;P59998-2;P59998-3	0.624304	1	0.658757	0.747067	0.531437	0.293987	0.10331	0.226847	0.171661	0.0817466	0.098253	0.0392142	0.00504051	0
A0A0A6YYH1;Q7Z6K5;Q7Z6K5-2	0.511215	1	0.293839	0.27812	0.292762	0.178429	0.118571	0.107002	0.10166	0.0901896	0.0472895	0.0109907	0.0163826	0
A0A0A6YYI3;A0A0B4J1V8;A8MV53;Q9NQ55;Q9NQ55-2;Q9NQ55-3	0	0	0	0	0	0	0.0159504	0.0363807	0.0225677	0.0545917	0.211502	0	0	1
A0A0A6YYL2;P0DMM9;P0DMM9-3;P0DMN0	0.729041	1	0.405353	0.354697	0.398982	0.24221	0.311564	0.162358	0.157107	0.0969316	0.051249	0	0.0530325	0.1152
A0A0A6YYL4;P57737-3	0.425676	0.432753	0.40193	0.382463	0.148773	0	0.0241525	0.0379135	0.0856419	0.103926	0.537277	1	0.555773	0.29096
A0A0B4J1R2;Q9H6R3	0.059512	0.0503547	0.0420605	0.0169826	0.0154003	0.00724144	0	0.0108877	0.0419858	0.0781772	0.525906	1	0.766682	0.541173
A0A0B4J1R4;P32754	0.848299	1	0.621992	0.546783	0.458381	0.259015	0.210426	0.134803	0.0521481	0.0428042	0.00978923	0	0.00558407	0.0366101
A0A0B4J1R7;Q96B45	0.356825	1	0.177532	0.297533	0.275934	0.47229	0.735703	0.562919	0.424783	0.385531	0	0.409572	0.07712	0.265557
A0A0B4J1S8;Q9UBF8;Q9UBF8-2;Q9UBF8-3	0.714559	0.765191	1	0.736847	0.769963	0.551362	0.422544	0.384612	0.11238	0.122821	0.27487	0	0	0.0362028
A0A0B4J1W0;B9TX62;F5GY88;H0YEG1;O75448;O75448-2	0	0	0	0	0	0	0	0	0	0	0	0	0	1
A0A0B4J1Y2;Q8NDW8;Q8NDW8-3;Q8NDW8-5;Q8NDW8-6;Q8NDW8-7	0.0754042	0	0	0	0	0.142438	0.356225	0	0.553295	0.6399	0.555185	1	0.622989	0.560935
A0A0B4J1Z1;C9JAB2;Q16629;Q16629-2;Q16629-3;Q16629-4	0.128551	0.237931	0.0794033	0.0647346	0	0.0534287	0.0364929	0.0967692	0.20355	0.185377	0.180767	0.416564	0.672471	1
A0A0B4J221;E9PR99;Q96LU5
A0A0B4J269	0.286112	0.411527	0.395662	1	0.689127	0.538594	0.885916	0.283025	0.098579	0.097528	0	0	0.0926864	0.116169
A0A0B4J291;Q8N8U2	0	1	0	0	0	0.124318	0	0	0	0	0	0	0	0
A0A0B4J294;H3BP13;Q9UL33;Q9UL33-2	0.965557	0.107871	0.674873	1	0.926966	0.775798	0.761771	0.3817	0.291711	0.304588	0.125128	0.0623845	0.292402	0
A0A0B4J297;I3L4V0;Q9BRA0;Q9BRA0-2	0	0.183673	0.100894	0.156663	0.219769	0.637995	0.781187	1	0.8384	0.984877	0.399899	0.628832	0.550726	0.181916
A0A0B4J2A0	0.614954	1	0.519322	0.512728	0.371996	0.197304	0.165057	0.0833277	0.0286756	0.0360521	0.00579748	0.000106732	0.0112223	0
A0A0B4J2C2;F8WF49;Q9Y2H0;Q9Y2H0-1;Q9Y2H0-3	0.464013	1	0.275913	0.301284	0.265071	0.178399	0.080277	0.053653	0.0649179	0.051381	0.0412432	0.00665791	0	0.0466008
A0A0B4J2C3;J3KPG2;P13693;Q5W0H4	0.620187	1	0.38317	0.36966	0.452788	0.586833	0.618443	0.51826	0.330723	0.241011	0.10243	0.120583	0.168443	0
A0A0B4J2D5;P0DPI2	0	0.0704322	0.0289082	0.0195837	0.0751349	0.0261502	0	0.0107169	0.0540687	0.22706	0.867154	0.917256	1	0.575643
A0A0B4J2E5;Q15269	0	0	0	0	0	0	0	0.0420072	0.0756717	0.0321518	0	0.0254169	0	1
A0A0B4J2F0	0	0	0	0	0	0	0	0.079658	0.331788	0.441978	0.965215	1	0.850595	0.277174
A0A0B4J2F8;E2QRJ6;F6S314;P52435	0.33126	0.47608	0.229107	0.423806	0.431063	0.152867	0.244627	0.107953	0.14143	0.176967	0.0545741	0	0.124683	1
A0A0B4J2G4;Q15345;Q15345-3	0.343428	0.324802	1	0.674562	0.449702	0.573587	0.376928	0.459258	0.463197	0.437458	0.0863926	0	0.16545	0.825278
A0A0C3SFZ9;M0QXD1;M0QY09;M0QZE1;M0QZI3;M0R1K4;M0R3E5;O14526;O14526-2;O14526-3	0.480865	0	0	0.481069	0.141623	1	0.760771	0	0	0	0	0	0	0
A0A0C4DFL7;Q16850	0.171688	0	0.10921	0.191942	0.244659	0.529548	0.683091	0.988669	1	0.831179	0.611319	0.784573	0.772549	0.578414
A0A0C4DFL8;F5GX28;O94953	0	0	0	0	0	0	0	0	0	0	0	0	0	1
A0A0C4DFM1;Q92544	0.0532541	0	0.106159	0.220138	0.364872	1	0.621018	0.307644	0.183449	0.185397	0.130509	0.137796	0.0668655	0.173878
A0A0C4DFM7;Q5TAX3	0.323224	0.618189	1	0.992371	0.803388	0.548822	0.71972	0.600518	0.491098	0.156247	0	0	0.224922	0.248248
A0A0C4DFP6;Q5T4F6;Q9NQ79;Q9NQ79-2;Q9NQ79-3	0.0730904	0.00473589	0.0532988	0	0.0122108	0.00670481	0.0114443	0.019606	0.109415	0.23347	0.302285	1	0.586121	0.227821
A0A0C4DFP7;Q9BXJ1;Q9BXJ1-2	0	0	0	0	0	0	0	0	0	0	1	0	0	0
A0A0C4DFR1;O75069;O75069-2;O75069-3;O75069-5	0.0400183	0	1	0	0	0	0.149014	0	0	0	0	0	0	0
A0A0C4DFU4;Q9HBG7-4	0.112587	0.169251	1	0.658774	0.534209	0.062033	0	0.0497739	0	0	0.0131631	0	0	0
A0A0C4DFV0;Q9H469	0.861414	1	0.76766	0.335266	0.44496	0.142125	0.479226	0.173242	0.166456	0	0.0480797	0	0.115846	0.0920003
A0A0C4DFW4;Q5JUR7	0	0.0744452	0	0	0	0.120564	0	0.254272	0.462594	0.038498	0.302	0	0.467667	1
A0A0C4DFX2;A0A286YFA9;A0A2R8Y5V8;A0A2R8YCY2;Q5TBA9	0	1	0.840031	0	0.629808	0	0	0	0	0	0	0	0	0
A0A0C4DFX9;Q9H3P2	0.0361246	0.612299	0.153595	0.0402652	0.140832	0.0665773	0.105994	0	0.196113	0.171872	0.0398127	0.81766	0.662181	1
A0A0C4DFY5;A8MXZ4;J9JIE0;Q9NQ84;Q9NQ84-2	0	0	0	0	0.179474	0.227796	0.495363	0.848282	0.871303	0.850014	0.441	0.427315	0.0635539	1
A0A0C4DFY7;Q6UWW8;Q6UWW8-2	0	0	0	0	0	0	1	0	0.817496	0	0	0	0	0
A0A0C4DFZ2;P15289;P15289-2	0.20038	0.00757943	0.277636	0	0.146822	0.475705	0.886207	1	0.973673	0.746814	0.572393	0.545245	0.216148	0.596389
A0A0C4DG02;F8WE91;Q9Y6K1;Q9Y6K1-2	0	0	0	0	0	0	0	0	0	0	0	0	0	1
A0A0C4DG17;C9J9K3;P08865	0.0188968	0	0.123657	0.158677	0.196803	0.273958	0.315925	0.416223	0.534625	0.606572	0.775973	1	0.770698	0.438637
A0A0C4DG21;A0A7D9NKC8;E7EP65;E7EW77;E9PEZ7;F8WAL6;Q9NYB9;Q9NYB9-2;Q9NYB9-4	0	0	0	0	0	0	0	0.324722	1	0	0	0	0	0
A0A0C4DG26;Q9NP71;Q9NP71-2;Q9NP71-3;Q9NP71-4;Q9NP71-6	0	0.497548	0.611732	0.13402	0.975859	0.680415	1	0	0.790433	0.0349415	0	0	0	0.508
A0A0C4DG40;Q8NF91;Q8NF91-4	0.54176	1	0.0967964	0	0.0829482	0.265219	0.221988	0.172905	0.568062	0.50629	0.459718	0.970695	0.490046	0.88901
A0A0C4DG51;Q9NP80;Q9NP80-3	0.0405726	0	0	0	0	0.00764166	0.0921952	0.174733	0.431047	0.475511	0.85003	1	0.619354	0.425771
A0A0C4DG60;F8W7P9;Q9H903;Q9H903-1;Q9H903-3;Q9H903-5
A0A0C4DG62;F5GYV5;F8WCT1;H7BZV4;Q66PJ3;Q66PJ3-2;Q66PJ3-3;Q66PJ3-4;Q66PJ3-7	0.05504	0.177832	0	0.0856535	0.215534	0.227022	0.0922293	0.0848363	0.188117	0.0844705	0.0684369	0.100384	0.166417	1
A0A0C4DG80;Q9P2N7;Q9P2N7-2;Q9P2N7-3;Q9P2N7-4;Q9P2N7-5	0	0	1	0	0	0.131817	0.0946578	0.110885	0.0405235	0.00703188	0	0	0	0
A0A0C4DG85;P40394;P40394-2	0.840586	1	0.563779	0.538801	0.400222	0.227436	0.0710111	0.142837	0.0334055	0.0551445	0.028984	0	0.00168421	0.0365801
A0A0C4DG88;P14859;P14859-2;P14859-3;P14859-4;P14859-5;P14859-6	0	1	0.068841	0.0639493	0.1462	0.180652	0.288745	0.159997	0.160662	0.120439	0.0518405	0	0	0.570667
A0A0C4DG89;Q7L014	0.0489087	0.084293	0.108229	0.070953	0.0506433	0.00616488	0	0.0263443	0.0491526	0.038381	0.108153	0.206286	0.400383	1
A0A0C4DG90;A4D0S4;A4D0S4-3	0	0	0	0	0	0	0	0.116943	0	0	1	0	0	0
A0A0C4DG91;A0A2R8Y7V2;C9J9V6;C9JQB1;O75414	0	0.0302793	0	0	0.0485204	0.0308176	0.0493965	0.0577702	0.105888	0.162115	0.576702	1	0.768855	0.482399
A0A0C4DG94	0	0	0	0	0	0	0	1	0.58338	0.281283	0	0.196686	0	0
A0A0C4DG95;C9IYJ2;E9PD56;F8WDF7;H7BYG4;Q7Z7A4;Q7Z7A4-2;Q7Z7A4-4;Q7Z7A4-6;W5RWE6	0	0	0	0.408768	0.14758	1	0	0.0466708	0.200034	0.422173	0	0	0	0.509852
A0A0C4DGA2;O75521;O75521-2	0.057832	0.0650635	0.0198389	0	0.00686205	0.00411689	0.00273174	0.078316	0.193857	0.271742	0.617763	1	0.71661	0.423714
A0A0C4DGA6;Q14527;Q14527-2	0	0	0	0.047443	0	0.011545	0.0824653	0.158861	0.0553488	0.0872827	0.0867617	0.23508	0.287035	1
A0A0C4DGA7;O94929;O94929-3	0	0	0	0	0	0	0.232636	0.435888	0.255169	0.294203	0.148033	0.234556	0	1
A0A0C4DGB0;Q9UIL1;Q9UIL1-2;Q9UIL1-3	0.601695	1	0.244888	0.334247	0.384552	0.36358	0.380413	0.0685215	0.149009	0.133075	0.0177274	0.00650175	0	0.202231
A0A0C4DGB9	0.0850494	0.115994	0.00217965	0.00186342	0.107175	0	0.00720508	0.00911413	0.0232215	0.0890819	0.607578	1	0.84189	0.507047
A0A0C4DGE4;A0A0J9YW33;A0A286YF28;Q13277;Q13277-2;Q13277-3	0	0	0	0	0	0.4203	0.56401	1	0.950891	0.735166	0	0	0	0.408059
A0A0C4DGE7;Q86UK5;Q86UK5-2;Q86UK5-3	0.447382	1	0.0836096	0.236822	0.296887	0	0	0	0	0	0	0.0798585	0	0
A0A0C4DGF7;Q6UXC1;Q6UXC1-2;Q6UXC1-3	0.367144	0	0.044299	0.0317284	0.427638	0.0472231	0	0.0762326	0.253445	0.130627	0.18196	0	1	0.805596
A0A0C4DGG1;Q9UKS6	0.0668246	0.0358597	0	0.171706	0.172791	0.373086	0.347994	0.505087	0.845906	0.839818	0.80071	1	0.698184	0.597191
A0A0C4DGG9;A0A2R8Y212;A0A2R8Y425;A0A2R8Y521;A0A2R8Y5J0;A0A2R8YFK9;A0A2U3TZM0;F5GWX5;Q14839;Q14839-2	0.216751	0.231582	0.159238	0.0895449	0.104737	0	0.0908178	0.0304009	0.03375	0.0530442	0.177157	0.283859	0.194565	1
A0A0C4DGH0;Q5ZPR3;Q5ZPR3-3;Q5ZPR3-4	0	0	0	0	0.0547533	0.121507	0.311601	0.516553	0.76222	0.748232	0.870629	1	0.618328	0.700162
A0A0C4DGH6;A0JNW5	0.500457	1	0.799485	0.877917	0.810523	0.336476	0.688591	0.192665	0.286984	0	0	0	0	0
A0A0C4DGI4	0	0	0	0	0	0	0	0	0	0	0	0	0	1
A0A0C4DGM9;B7Z896;F5H3M2;Q9BVG8;Q9BVG8-2;Q9BVG8-4;Q9BVG8-5;Q9BVG8-6	0	0	0	0	0	0	0	0.0569482	0	0.339076	0.29437	0.406824	0.361523	1
A0A0C4DGN6;J3QRU8;Q9Y2X7;Q9Y2X7-3	0	0.0430234	0.327013	0.589619	0.407666	0.43393	0.200708	0.229119	0.248011	0.295761	0.633079	1	0.775176	0.286536
A0A0C4DGP0;E7EU35;Q9UKF7-2	1	0.0777055	0.231762	0.214638	0.280111	0.153431	0.0997839	0.0695224	0.0243505	0	0	0	0	0
A0A0C4DGQ4;Q86W25	0.417641	1	0.243834	0.873355	0.17824	0.214492	0.0492472	0.187531	0	0.0417408	0	0	0	0
A0A0C4DGQ5;P04632	0.617653	1	0.437738	0.391128	0.373781	0.267268	0.184206	0.10347	0.0545297	0.0313464	0	0.00146877	0.00645826	0.0208222
A0A0C4DGQ8;Q6IAN0	0	0	0	0.0663471	0.0629055	0.253546	0.391105	0.531505	0.75423	0.778754	0.800643	1	0.593235	0.441158
A0A0C4DGR2;M0QY25;M0QYH7;M0QYQ4;M0QZQ2;Q71SY5;Q71SY5-4;Q71SY5-5;Q71SY5-6;Q86YD1;Q86YD1-2	0	0	0	1	0	0	0	0	0	0.394119	0	0	0	0
A0A0C4DGR5	0	0	0	0	0	0.457227	0.190564	0	0	0	0	0	0	1
A0A0C4DGS1;P39656;P39656-3	0.030565	0	0.0114415	0.0255307	0.0443276	0.132567	0.177894	0.288797	0.43103	0.434047	0.826503	1	0.659719	0.459868
A0A0C4DGV4;E9PLX3;O43504;R4GMU8	0.577365	0.472697	0.18681	0.157168	0.299045	0.769637	1	0.769008	0.775191	0.257949	0.193732	0.301073	0	0.209062
A0A0C4DGZ4;Q9Y5U4	0	0	0	0	0	0	0	0.809307	1	0.254976	0	0	0	0
A0A0C4DH01;Q9NVU0;Q9NVU0-2;Q9NVU0-3;Q9NVU0-4;Q9NVU0-5	0	0.882453	1	0.847433	0.336367	0.574573	0.224392	0.231759	0.0427962	0.109189	0.0444825	0	0.0443652	0.345688
A0A0C4DH07;Q8N2S1;Q8N2S1-2;Q8N2S1-3	0	0	0	0	0.427785	0	0.162659	0.180941	0	0	0.432219	1	0.561942	0
A0A0C4DH13;E5RG96;J3KQJ9;Q8N2E2	0	0	0	0	0	0	0	1	0	0	0	0	0	0
A0A0C4DH16;B8ZZS0;H7BXT7;Q9NYM9	0	0	0	0	0	1	0.679268	0.522418	0.102041	0	0	0	0	0
A0A0C4DH36	0	0	0	0	0	0	0	0	0	0	0	0	1	0.828997
A0A0C4DH65	0	0	0	1	0	0	0	0	0	0	0	0	0	0
A0A0D2X7Z3;Q49AN0;Q49AN0-2	0	0	0	0	0	0.920755	1	0	0	0	0	0	0	0
A0A0D5XQ77;A0A0U5Q247;A0A140T8Z5;A0A140T981;A0A140T9R6;A0A140T9Y4;A0A140T9Z9;A0A140TA15;P01920;Q29967	0	0	0	0	0.197818	0.35013	0.39195	0.479592	0.439238	1	0.254653	0	0.258115	0
A0A0D9SEI0;Q9P0P8	0	0	0	0	0	0.083004	0.206575	0.195449	0.12048	0.322426	0.754061	1	0.511487	0.280418
A0A0D9SEI3;A0A0D9SEN2;A0A0D9SER5;P21127;P21127-2;P21127-3;P21127-8	0.294187	0.715584	0.37242	0.332384	0.298732	0.17646	0.0759774	0.0537357	0	0.0880823	0.137549	0.20312	0.534829	1
A0A0D9SEJ5;F5GY05;Q96EK7;Q96EK7-2	0	0	0.254824	1	0.451396	0.416949	0.472356	0	0.36179	0	0	0	0	0.157448
A0A0D9SEK1	0	1	0	0	0.296629	0.265355	0	0	0.174329	0	0	0	0	0
A0A0D9SEN7;A0A2R8Y7Z3;I3L0L0;Q13950;Q13950-2;Q13950-3	0.0897278	0.00952083	0.0152695	0	0.23244	0.202545	0.91838	0.317417	0.503476	0.480702	0.192443	0.448413	0.906987	1
A0A0D9SES8;H0YKN8;H0YKT5;H0YL70;H0YNI7;H0YNT2;Q04724;Q04726;Q04726-2;Q04726-3;Q04726-4;Q04726-5;Q04726-6;Q04726-7;Q04727;Q04727-2;Q04727-3;Q04727-4	0.409187	0	1	0.790856	0.58893	0	0.0916175	0.0728746	0	0.0980138	0	0	0	0.231599
A0A0D9SET2;A0A0D9SFD0;A0A0D9SGI5;A0A0R4J2G5;A0A1B0GTW4;A0A1B0GV32;D6R942;D6RB91;D6RC63;D6RCM6;D6RG14;D6RG21;D6RJA7;D6RJG6;D8L7E9;H0YM62;Q02078;Q02078-2;Q02078-3;Q02078-4;Q02078-5;Q02078-6;Q05BX2;Q06413;Q06413-2;Q06413-3;Q06413-4;Q06413-5;Q06413-6;Q14814;Q14814-2;Q14814-3;Q14814-4;Q14814-5;Q14814-6	0	0	0	0	0	0.0731052	0.0844732	0	0.199431	0.141563	0	0	0.167412	1
A0A0D9SEU5;Q6VN20;Q6VN20-3;R4GMX8	0.352093	0.736496	1	0.808484	0.53949	0.47003	0.341661	0.337909	0.236072	0.274606	0.157882	0.0778277	0	0.237013
A0A0D9SEX5;Q9H6R6;Q9H6R6-2
A0A0D9SEY1;E7EN19;E7ENQ1;G3XAA2;G5E948;H7C360;O95819;O95819-2;O95819-3;O95819-4;O95819-5;O95819-6	1	0.12059	0	0.0934639	0.219722	0.0946735	0.041246	0.0714667	0.103036	0.236169	0.0809146	0.0972859	0.0863791	0.0691012
A0A0D9SF07	0	0	0	0	0	0	0	0	1	0	0	0	0	0
A0A0D9SF44;A0A0R4J2E2;Q9Y3T6;Q9Y3T6-3	0.640834	1	0.440719	0.138352	0.326997	0.474572	0.0507436	0.109856	0	0	0	0	0	0
A0A0D9SF53;A0A0D9SFB3;A0A0D9SG12;A0A2R8Y4A4;A0A2R8Y645;A0A2R8YCW1;A0A2R8YF78;A0A2R8YFR4;A0A2R8YFS5;A0A2U3TZJ9;O00571	0.221516	0	0.294378	0.407208	0.404637	0.826658	0.859845	0.98164	1	0.870863	0.766989	0.64445	0.786939	0.855745
A0A0D9SF60;Q99569;Q99569-2	0.542355	0	0	0.0959854	0	0.22812	0.176752	0.375059	0.637883	0.724782	0.758509	0.860967	0.40294	1
A0A0D9SF63;Q9BZK7	1	0.388874	0.814171	0.44496	0.292509	0.311891	0.339584	0	0.258489	0	0	0	0.245291	0.650108
A0A0D9SFB1	0	0	0	0	0	0	0	0	1	0	0	0.320885	0.437049	0
A0A0D9SFB5;P08319;P08319-2	0.741487	1	0.65712	0.563629	0.432653	0.256719	0.164766	0.142902	0.0556957	0.0537211	0.0362587	0.00133406	0	0.0391679
A0A0D9SFE1;Q9H936	0.0147072	0	0.00628131	0.00881291	0.0180831	0.040755	0.0406677	0.102295	0.198494	0.323533	0.966929	1	0.493301	0.378887
A0A0D9SFG6;O43739;O43739-2;Q15438;Q15438-2;Q15438-3;Q99418;Q99418-2	1	0.537769	0.880058	0.699613	0.678715	0.495995	0	0.483859	0.360306	0.370412	0.221045	0.0375747	0.159324	0.529434
A0A0D9SFJ2;A0A1B0GWF1;A0A2R8Y5Y4;A0A2R8Y6P1;Q6ZU35	0	0	0	0	0	0	0	0	0.243777	0.285968	0	1	0	0
A0A0D9SFK2;Q92614;Q92614-3;Q92614-4	0	0.677537	0.94949	0.824171	0.456698	0.0962033	0.024537	0.13605	0.368808	0.246021	0.334496	0.431252	0.237032	1
A0A0D9SFM0;Q149N8;Q149N8-4	0	0	0	0	0	0	0	0	1	0.452083	0	0	0	0
A0A0D9SFR6;Q16760;Q16760-2;Q86XP1;Q86XP1-2;Q86XP1-3;Q86XP1-5	0	0.270099	0.37317	0	0.514901	1	0.192906	0.88218	0	0.253806	0.350981	0	0	0
A0A0D9SFT8
A0A0D9SG52;Q6ZWI9	0	0	0	0	0	0	0.368092	1	0.10361	0	0	0	0	0
A0A0D9SG71;P49459;P49459-3	1	0.390493	0.378651	0.356373	0.472508	0.203559	0.401558	0.0227203	0.0423414	0.0185239	0.00832835	0	0.00615631	0.149975
A0A0D9SG72;A0A1B0GTP9;A0A1B0GVQ5;A0A1B0GWF2;A0A2R8Y5D4;P61764;P61764-2	0.0012972	0	0.12247	0.135692	0.24056	0.264555	0.346368	0.730893	1	0.858338	0.59344	0.692363	0.403082	0.693914
A0A0D9SG79;Q9NZ09;Q9NZ09-3;Q9NZ09-4	0	0	0	0.297637	0	1	0.83961	0.893966	0	0	0	0	0	0
A0A0D9SG96;Q9ULB1-3	0	0	0	0.380211	1	0	0.80319	0.136442	0.749444	0.495533	0.632701	0.28499	0	0.376485
A0A0D9SGD6;B0QZE2;B7Z2J6;E7ENI9;E7EV75;Q15326;Q15326-2;Q15326-5	0	0	0	0	0	0	0	0	0.10912	0	0	0.0669661	0	1
A0A0D9SGE8;Q5JRC6;Q8IWS0;Q8IWS0-2;Q8IWS0-3;Q8IWS0-4;Q8IWS0-5
A0A0D9SGF6;Q13813;Q13813-2	0.0520837	0.0473292	0.0245624	0.03461	0.007074	0	0.129176	0.267521	0.716024	0.767174	0.801892	0.888915	0.930984	1
A0A0D9SGH0;A0A1B0GV11;Q92581;Q92581-2;Q92581-3	0	0	0.41034	0.683922	0.871089	1	0.739178	0.688975	0.388168	0.396538	0.305616	0.0926952	0.0781552	0.270511
A0A0D9SGJ6;C9JFZ1;J3KPK1;J3KQV8;O43426;O43426-2;O43426-4	1	0.908682	0.499841	0.605407	0.32104	0.168149	0.0351447	0.353321	0.419429	0.211695	0.088607	0.109753	0.096454	0
A0A0G2JH30;A0A0G2JPX0;A0A2R8YFP9;A6NK88;P49918;P49918-2
A0A0G2JH50;A0A0G2JIF0;A0A1W2PS56;A2BF26;Q5RIP0
A0A0G2JH68;O60610	0.763533	1	0.77301	0.678482	0.499862	0.279274	0.222147	0.174436	0.1078	0.0845492	0.0232926	0	0.0299358	0.0584155
A0A0G2JHC2;Q6NYC8	0	0	0	0	0	0	0.0522743	0.446103	0.788283	1	0.625016	0.28054	0.395009	0.98457
A0A0G2JHL0;A0A0G2JK44;A0A140T9E9;A0A140T9F7;A0A140T9V2;H0Y6K2;P25440;P25440-2;P25440-3;U3KQA6	0	0	0	0	0	0	0.0286506	0	0.0155139	0	0.0564933	0	0	1
A0A0G2JI43;A0A0G2JIJ2;A0A140T926;A0A140T9C9;A0A140T9I2;A0A140T9R0;A0A140T9R2;A0A140T9T8;A0A140T9U6;F6UB75;P28068	1	0	0.250341	0	0	0.413754	0.149767	0.240164	0.174526	0.209995	0	0.120983	0	0.666683
A0A0G2JIR1;A0A0G2JIS2;A0A0G2JK64;A0A0G2JRN8;A0A0G2JRR0;A2ABF8;A2ABF9;Q96KQ7;Q96KQ7-2	0	0	0	0	0	0	0	0	0.0445579	0	0	0	0.129903	1
A0A0G2JIW1;P0DMV8;P0DMV9	0.5534	1	0.402651	0.317285	0.24125	0.17673	0.183589	0.0712146	0.0512583	0	0.00230838	0.0181931	0.0191536	0.0494296
A0A0G2JJD3;O95870	0.0486493	0	0.0635332	0.0839074	0.137334	0.256398	0.447252	0.60196	0.658737	0.593125	0.844348	1	0.592951	0.513251
A0A0G2JJP1;Q9C019	0.0181542	0	0.0979995	0.298322	0.804438	0.793008	1	0.87391	0.656429	0.388378	0.0400277	0.980715	0.804158	0.354527
A0A0G2JL52;A0A140T8Y0;A0A140TA35;B4E0K6;Q5ST30;Q5ST30-4	0.0360126	0.0351492	0.0266406	0	0.015288	0.0181315	0.0514966	0.0627763	0.0847792	0.170619	0.568978	1	0.654604	0.579338
A0A0G2JLC7	0	0	0	0	0	0	0	1	0	0	0	0	0	0
A0A0G2JLK7	0	0	0	0	0	1	0	0.778892	0	0	0	0	0	0
A0A0G2JLQ8;A0A0G2JLX3;A0A0G2JNC8;A0A0G2JP37;A0A0G2JPB6;A0A0G2JPQ2;F5H5B1;F5H7Q5;J3KN39;K7EJ90;K7ELX1;Q9NX02;Q9NX02-2;Q9NX02-3;Q9NX02-4	0	0	0	0	0	0	0	0	0	0	0	0	1	0
A0A0G2JM39;A0A0G2JN91;A0A0G2JNH1;M0QYD1	0	0	0.137784	0.110147	0.12781	0.128489	0.258961	0.0534683	0.0628785	0.201765	0.100854	1	0.219848	0.437131
A0A0G2JM63;A0A0G2JNK3;A0A0G2JPH3;Q8WX94-2;Q8WX94-3	0	0	0	0	0	0	0	0	0	0	1	0	0	0
A0A0G2JM70;Q9NV79;Q9NV79-2;Q9NV79-3;V9GZ41	0.759946	1	0	0	0	0	0	0	0	0	0	0	0	0
A0A0G2JMD2;A0A2R9YJI8	0.113529	0	0.112966	0.178917	0.279735	0.555889	0.91192	1	0.598107	0.527288	0.438025	0.465848	0.324758	0.32208
A0A0G2JMW3;A0A0G2JP44;Q9HBB8;Q9HBB8-2;Q9HBB8-4	0	0	0	0.135507	0	0.146954	1	0.39713	0.478876	0.39435	0.132655	0.10464	0.14587	0.175273
A0A0G2JMX7;A0A0G2JPD5;A0A0G2JQJ7;A0A0G2JS76;P10636;P10636-6;P10636-7;P10636-8;P10636-9	0	1	0	0.00759948	0.443676	0.509481	0.778489	0.365572	0.280796	0.29001	0.198313	0	0.107665	0.0769707
A0A0G2JMZ6;O60282	0	0.667209	1	0	0.658727	0.550888	0	0	0	0	0	0	0	0.432431
A0A0G2JMZ8;Q16625	0.234083	0.201117	0.0352094	0	0.169139	0.46906	0.415088	0.651615	0.821618	0.912106	0.868737	0.735097	0.472425	1
A0A0G2JN23;A0A0G2JQ38	0	0	0	0	0	0.125333	0.185291	0.336516	0.51357	0.381139	0.186295	0.132739	0.274446	1
A0A0G2JN42;A0A0G2JNJ8;Q6W4X9	0	0	0	0	0	0	1	0	0	0	0	0	0	0
A0A0G2JN53	0.383074	1	0.25149	0.193064	0	0.261397	0.0536049	0.195996	0.137701	0.198595	0.365378	0.437378	0.355749	0.295043
A0A0G2JN84;P59817	0	0	0	1	0.376301	0.643479	0	0	0.246643	0.0874843	0	0	0.113424	0.299133
A0A0G2JNW7;Q9Y666	0	0	0	0	0.214013	0.264471	0.377618	0.463767	0.814088	0.604952	0.65572	0.55052	0.566401	1
A0A0G2JNZ2;A0A669KB89;Q14160	0.176914	0.138298	0.00454277	0	0.0725666	0.108779	0.206991	0.348789	0.726695	0.788684	0.853676	0.697889	0.55293	1
A0A0G2JPC8;B4DTC2;E7EPX8;E7ER82;Q8TC27	0	0	0.393836	1	0.672987	0.528033	0	0.210578	0	0	0	0	0	0
A0A0G2JPQ3;P17693;P17693-5;Q5RJ85;Q8MH48	0	0	0	0	0	0	0	0	0	1	0	0	0	0
A0A0G2JPZ6;A0A0J9YWU2;Q9H3Q3	0	0	0	0.0415855	0.00981739	0.0927417	0.464347	0.402322	0.271748	0.44871	0.327642	1	0.845808	0.656618
A0A0G2JQ41;A0A1C7CYZ0;B7Z683;Q12979;Q12979-2;Q12979-4	0	0	0	1	0	0	0	0	0	0	0	0	0	0
A0A0G2JQC6;A0A0G2JQK9;A0A0G2JRT1;E7EWN1;Q99102-3	0	0	0.799619	0	0	0.433285	0.170925	0.303093	0.798245	0	0.0952543	0.346244	0.273892	1
A0A0G2JRG1	0	0	0	0	0	0	0.0962824	0	0.134405	0.366914	0.236625	0.59078	1	0.502967
A0A0G2JS52;Q01538;Q01538-2	0	0	0	1	0	0	0	0	0	0	0	0	0	0
A0A0J9YVP6;Q9UHX1-2	0.564728	0.670153	0.368421	0.252064	0.110801	0.232864	0	0.19673	0.340283	0.177369	0.235932	0.591192	0.640717	1
A0A0J9YVW4	1	0.484164	0.140637	0.116574	0.421468	0.0464539	0.123714	0.0272808	0.056197	0.0250727	0	0	0.0330536	0
A0A0J9YW18;F6RP06;Q12983	0.00982427	0	0	0.00878633	0.00995949	0.053049	0.082942	0.159573	0.227431	0.28609	0.587473	1	0.548035	0.308132
A0A0J9YW63	0	0	0	0	0	0	0	1	0.353529	0	0	0	0.673249	0
A0A0J9YW64;A6NIW2;Q5JSL3
A0A0J9YWD2;A0A0J9YX19;A0A0J9YXY6;A0A0J9YYK8;A0A1B0GTJ5;A0A1B0GU79;A0A1B0GUR8;A0A1B0GVR1;Q9UBY8	0	0	0	0	0.574745	0.460448	0	0.533093	0.720037	0	0	0	0	1
A0A0J9YWD5;A0A0J9YX88;A0A0J9YYB5;B7ZM65;E9PJ24;F8WEF5;Q9P1Y6;Q9P1Y6-2;Q9P1Y6-3	0	0	0	0	0	0.142438	0.34391	0.332918	0.246307	0.148404	0.307291	0.357961	0.471568	1
A0A0J9YWE1;A0A0J9YWN0	0	0	0	0	0	0	0	1	0	0.714737	0	0	0	0
A0A0J9YWL0;Q9Y4K1	0	0	0	0	0	0.334439	0	0	0.903731	1	0	0.632169	0	0.308021
A0A0J9YWR7;A0A0J9YXE4;Q8N2F6;Q8N2F6-2;Q8N2F6-3;Q8N2F6-4	0	0	0	0	0.0254754	0.0217343	0.165379	0.155295	0.152484	0.243625	0.690989	1	0.521101	0.566606
A0A0J9YWV4;O75154;O75154-2;O75154-3;X6RFI8	0.379618	1	0.322034	0.199833	0.106018	0.229736	0.276816	0.409832	0.0419593	0	0	0	0	0
A0A0J9YX34;A0A6Q8PEY7;A0A6Q8PF18;A0A6Q8PF63;A0A6Q8PF74;A0A6Q8PFB0;A0A6Q8PFI4;A0A6Q8PFM2;A0A6Q8PFS5;A0A6Q8PFV0;A0A6Q8PFX3;A0A6Q8PG16;A0A6Q8PGE9;A0A6Q8PGG4;A0A6Q8PGL5;A0A6Q8PH06;A0A6Q8PHE9;A0A6Q8PHG4;A0A6Q8PHP4;A0A6Q8PHR6;C9J084;Q9C040;Q9C040-2	0	0	0	0	0	0	0	0	0	0	0	0	0	1
A0A0J9YX62;C9J2C4;O75190;O75190-2;O75190-3	0.423777	1	0.437341	0.310443	0.246669	0.117372	0.171418	0.00654584	0.0571385	0.0700803	0.142609	0.0489889	0	0.294105
A0A0J9YX66;A0A0J9YXJ0;A0A1B0GU44;A0A1B0GUN8;E9PC62;O95319;O95319-2;O95319-3;O95319-4;O95319-5;Q5VZZ6;V9GYD9	0	0	0	0	0	0	0	0.782928	1	0.860215	0	0	0	0
A0A0J9YXF2;Q15165;Q15165-1	0.0993047	0	0.0239279	0.0463094	0.128876	0.402184	0.735006	0.908966	0.99961	0.814016	0.753476	1	0.748233	0.464455
A0A0J9YXM6;Q562E7	0.535736	0.748373	1	0.839104	0.68998	0.578985	0.425389	0.525062	0.328891	0.265549	0.0852277	0.0697104	0	0.164161
A0A0J9YXN7	1	0.18001	0.0264058	0.0145594	0	0.011643	0.000436836	0.00227925	0.0139237	0.0162667	0.0115681	0.0507967	0.00184576	0.023395
A0A0J9YXT0;H7C5H6;Q9H0F7;Q9H0F7-2	0	1	0.518779	0.397989	0.609169	0.531949	0.137144	0.186049	0	0	0.375784	0	0	0
A0A0J9YY17;A0A1C7CYW8;A0A669KB38;Q8IVF4	0	0	0	0	0	0	0	0.499613	1	0.00167494	0.827219	0	0	0
A0A0J9YY72;A0A1W2PQQ1;Q5HYW2	0	0	0	0	0	0	0	0.445121	1	0.166013	0.157041	0	0	0
A0A0J9YYF0	0	0	0	0	0	0	0	0	0	0.112199	0	0	0.563969	1
A0A0J9YYF7;Q86T65;Q86T65-4	0	0	0	0	0	0.0736452	0.164652	0.23314	0.287104	0.228575	0.425714	1	0.560159	0.108447
A0A0K0K1A5	0	1	0.687877	0.884389	0.109959	0.351743	0.104624	0.223814	0.221284	0.0936505	0	0	0	0
A0A0R4J2E8;D6REM6;P43243	0.0135566	0	0.0166717	0.0227418	0.0452481	0.109301	0.109232	0.180809	0.20633	0.220766	0.253896	0.365953	0.581471	1
A0A0R4J2F3;P0DPB6	0.253572	1	0.629771	0.512936	0.49947	0.499655	0.323453	0.668424	0.224166	0.549254	0.147268	0	0	0.779583
A0A0R4J2F6;Q12894;Q12894-2	0	0	0.37046	0.842181	0.545976	1	0.410751	0.805946	0.685553	0.577953	0.502921	0.633926	0.677832	0.676958
A0A0S2Z4L3;A0A3B3ISJ1;G5E9F8;P07225	0.126503	0	0	0.188017	0.21324	0.478605	0.707311	1	0.906788	0.800407	0.329213	0.329213	0.492124	0.365883
A0A0S2Z4L7;O60603	0	0	0	0	0	0	0.618382	0.247468	0.483747	1	0	0	0	0
A0A0S2Z4Q7;A0A1W2PQQ6;A0A1W2PQR0;A0A1W2PR45;A0A1W2PRC6;A0A1W2PRD9;A0A1W2PRY1;A0A1X7SBT2;C9JYS9;Q9UNP4;Q9UNP4-2;Q9UNP4-3	0	0	0	0.0938006	0	1	0.749542	0.328334	0.232619	0.0925516	0.151136	0.0498262	0	0.107247
A0A0S2Z5D0;A0A1B0GTU6;H3BUV4;Q9NWW5;Q9NWW5-2	0	0	0	0	0	0.155475	0.761391	0.215064	1	0.314065	0.635481	0.838149	0.20307	0
A0A0U1RQC7	1	0	0	0	0	0	0	0	0.0171117	0	0	0	0	0
A0A0U1RQE4;A0A494C1M0;Q5HYK7;Q5HYK7-2;Q5HYK7-3	0.554961	1	0.27979	0.227395	0.39555	0.21656	0.231338	0.156413	0.10427	0.112789	0.0459644	0.0284272	0	0.0707316
A0A0U1RQK7	0.438038	1	0.309017	0.332689	0.298169	0.348002	0.427082	0.460727	0.40001	0.337901	0.0845212	0.497348	0.497125	0
A0A0U1RQK9	0	0	0	0	0	0	0	0	0	0	0	1	0	0
A0A0U1RQM0;H0YKX3;H0YMA4;Q15004
A0A0U1RQQ9;Q6P3W7	0.474968	0.644217	0.761546	0.620077	0.711698	0.783648	1	0.962697	0.473214	0.549096	0.162489	0.0119097	0	0.510747
A0A0U1RQS4;A0A0U1RR93;Q9BYB0;Q9BYB0-3	0	0	0	0	0	0	0	0.35161	1	0.233317	0	0	0	0.265223
A0A0U1RQT8;Q8TCZ2;Q8TCZ2-2;Q8TCZ2-3;Q8TCZ2-5	0	0	0	0	0	0.046162	0	1	0.649953	0.743461	0.559354	0	0	0
A0A0U1RQW6;E7EPU2;Q9Y2E4	0	0.125486	0.547386	0.790846	0.69631	0.503604	0.628476	0.771884	0.915042	0.814264	0.812779	0.718146	0.652403	1
A0A0U1RQY4	0	0	0.0740561	0.135678	0.179101	0.285627	0	0.311863	0	0.993996	0.210689	0.417212	0.134919	1
A0A0U1RR06;Q9Y484;Q9Y484-2;Q9Y484-3	1	0.592346	0.747173	0.543782	0.457774	0.283277	0.359189	0.28276	0.229708	0.236829	0.143245	0.0511303	0	0.145099
A0A0U1RR16;A0A3B3IRZ7;Q8NEY4;Q8NEY4-2	0.387406	1	0.611521	0.64537	0.547074	0.384401	0.592563	0.245472	0.0905317	0.189531	0	0.0070498	0.338774	0.422985
A0A0U1RR25	0	0	0	0	0	0	1	0	0	0	0	0	0	0
A0A0U1RR27;H3BTW5;Q7Z401;Q7Z401-2	0.340754	0.764276	1	0.998349	0.592215	0.740746	0.176642	0.134676	0.445054	0	0	0	0	0
A0A0U1RR32;A0A0U1RRH7;P0C0S8;P20671;Q96KK5;Q99878;Q9BTM1	0.0379759	0.00344897	0	0.00894407	0.0183861	0.0219774	0.0442351	0.0274514	0.112364	0.14093	0.244592	0.194013	0.180007	1
A0A0U1RR76;A6NJ78;A6NJ78-2;A6NJ78-4;P0C7V9	0	0	0	0	0	0	0	0	0	0	0.413988	1	0.763878	0.401053
A0A0U1RRA6;B5MCG9;B5MCU0;H7C0E9;Q9Y2K5	0.424955	1	0.345158	0.431004	0.448108	0.277308	0.219988	0.152189	0.133115	0	0.0618385	0	0	0
A0A0U1RRB6;J3QT38;Q9Y2D4;Q9Y2D4-2	0	0.188463	0.456773	0.436506	0.360086	0.273922	0.20434	0.283742	0.708533	0.460719	0.417481	0.386374	0.706253	1
A0A0U1RRB9;F2Z2V1;Q96C11;Q96C11-3	0.819501	1	0.739866	0.561753	0.480637	0.230513	0.217403	0.127286	0.0591513	0.0475742	0.0498437	0	0.0627723	0.0597361
A0A0U1RRK1;A0A286YF11;F6XEV2;Q9BPX6;Q9BPX6-3	0	0	0	0.113791	0.538694	0	0.0625333	0.126942	0.285064	0.367115	0.849381	1	0.673208	0.523853
A0A0U1RRL7	0	0	0	0	0	0	0	0	0.0529907	0.121517	0.494964	1	0.298969	0.080836
A0A0U1RRL8;Q8TB22;Q8TB22-2;Q8TB22-3	0.161346	0	0.0988181	0.105041	0.112956	0.160612	0.0879748	0.134153	0.220162	0.198328	0.716637	1	0.778349	0.715886
A0A0U1RRM1;Q8WXI9	0	0	0	0	0	0	0	0	0.0838672	0	0	0	0	1
A0A126GWB3;P47888	0	0	0	0	0	0	0	1	0	0	0	0	0	0.0273731
A0A140LJL2;Q8N350	0	0	0	0	1	0	0	0	0	0	0	0	0	0
A0A140T8Y3;A0A140T902;A0A140T9C0;A0A140TA33;A0A140TA41;A0A140TA52;A0A3B3ISX9;P22105;P22105-1;P22105-4	0	0.0471471	0.0898517	0.040998	0.0454392	0.0417018	0.106708	0.0227873	0.110759	0.115877	0.32417	0.433646	0.261234	1
A0A140T913;A0A140T933;A0A140T955;A0A140T9I0;A0A140T9X5;A0A1W2PRT9;Q53Z42	0.0777682	0	0.0244504	0.122983	0.113697	0.315959	0.469827	0.757221	1	0.858215	0.795962	0.71915	0.521016	0.752356
A0A140T951	0.0357782	0	0	0.00781835	0.0463843	0.302904	0.426041	0.833194	1	0.993774	0.819011	0.832919	0.619762	0.813078
A0A140T962;A0A140T9B3;A0A140T9J9;A0A1W2PR11;Q5QT33	0.275716	0	0.040352	0.169633	0.247445	0.425595	0.614238	0.849578	0.918731	0.751706	1	0.890801	0.721345	0.775724
A0A140T9B9;A0A140T9N6;A0A140T9V9;H0Y551;P14373
A0A140T9G8;Q0P5T2;Q5SQH8;Q5SQH8-2;Q5SQH8-4	0	0	0	0	0	0	0	0	0	0.077384	0.11091	1	0.107134	0.942812
A0A140T9T7;Q03518	0	0	0	0	0.19063	0.479255	0.575838	1	0.941229	0.723217	0.587236	0.564336	0.482035	0.538576
A0A140TA01;E9PQT8;E9PQZ5;O43189;O43189-2	0	0	1	0	0.819862	0	0.42888	0.620079	0	0.350177	0	0	0.343138	0.614636
A0A140TA09;Q99942	0.574213	0.358287	0	0.0455	0.219142	0.616089	0.581735	1	0.498794	0.40865	0.296135	0.300141	0.237352	0.0632637
A0A140TA86;Q5XKP0	0	0	0	0	0	0	0	0	0	0	0	1	0.36963	0.586955
A0A140VK87;H0Y7R1;Q8TBZ2
A0A182DWF2;A0A182DWF3;Q9NNW7;Q9NNW7-2	0.105583	0.0926543	0.0181791	0.00345594	0.0387516	0.00646436	0.0166573	0	0.0291765	0.0872496	0.558227	1	0.76139	0.441134
A0A182DWH7;P49908	0	0.0945759	0.218782	0.237624	0.408232	1	0.913209	0.409467	0.455158	0.347991	0.322172	0.408249	0.0943515	0.0784065
A0A182DWI4;E9PN30;Q9BQE4	0	0	0	0	0	0	0	1	0.581275	0.210048	0	0	0	0
A0A1B0GTB0;A0A1B0GTU8;A0A1B0GU12;A0A1B0GUT7;A0A1B0GVB9;A0A1B0GVC7;A0A1B0GVW0;A0A1B0GWJ8;A0A1C7CYW4;B7Z413;H7C3E1;O75787;O75787-2	0	0	0	0	0	0.278431	0.290675	0.731299	0.529369	0.496463	1	0	0.19769	0
A0A1B0GTF3;A0A6I8PIT5;A0A6I8PIW1;A0A6I8PLB1;O43301	0	0	0	0	0	0	0	1	0.117231	0	0	0	0	0
A0A1B0GTG2;A0A1B0GW77;P49419;P49419-2	0.362327	0.305166	0.280882	0.224083	0.191791	0.0323441	0.0420267	0.00800665	0	0.0500754	0.580973	1	0.759454	0.420138
A0A1B0GTH8;A0A1B0GUV4	0	0	0	1	0	0	0	0	0.199533	0	0	0	0	0
A0A1B0GTJ7;A0A1B0GWJ0;P30566	0.599495	1	0.770697	0.767909	0.430418	0.273685	0.143294	0.123341	0.0556388	0.0383871	0.0252359	0	0.00241675	0.0154569
A0A1B0GTJ8;A0A1B0GV63;A0A1B0GVK1;A0A1B0GWJ2;A0A3F2YNW7;A0A6Q8NVI4;H0Y7H8;Q8NFD5;Q8NFD5-2;Q8NFD5-3;Q8NFD5-4	0	0	0	0	0	0	0	0.106061	0	0	0	0.451412	0.0941047	1
A0A1B0GTK6	1	0	0.780322	0.344324	0.305974	0.625116	0.425967	0.188693	0.151595	0	0	0	0	0
A0A1B0GTL7;A0A1W2PQ11;A0A1W2PQ86;A0A1W2PQJ4;Q02246	0	0	0	1	0	0	0	0	0	0	0	0	0	0
A0A1B0GTM1;A0A1B0GUM5;E7ETX0;Q8NHX9	0	0	0	0	0	0	1	0	0	0.661083	0	0	0	0
A0A1B0GTM3;A0A1B0GUA4;A0A1B0GUH5;A0A1B0GW68;Q13510;Q13510-2	1	0	0.184598	0.256785	0.283009	0.703477	0.601548	0.925934	0.976339	0.857912	0.655767	0.797807	0.319186	0.998843
A0A1B0GTT2	0	0	0	0	0	0	1	0	0	0.458989	0	0.388605	0	0
A0A1B0GTU3;Q96L93;Q96L93-2;Q96L93-4;Q96L93-5;Q96L93-6	0	0	0	0	0	0	1	0	0	0	0	0	0	0
A0A1B0GTU4	0.519566	1	0.188035	0.157195	0.130261	0.12003	0.195566	0	0.144188	0.140953	0.14628	0.119937	0.144196	0.0608005
A0A1B0GTU5;H0Y488;O14497;O14497-2;O14497-3	0	0	0	0	0	0.0972667	0	0.0415322	0.11367	0.0934361	0.198541	0.0960819	0.0196403	1
A0A1B0GTU7;H0YD36;P54098	0	0	0	0	0	0	0	0	0	0.0308588	0.126691	1	0.458943	0.492667
A0A1B0GTV6	0	0	0	0	0	0	0	0.0331113	0.0388812	0.139192	0.35033	1	0.353753	0.129299
A0A1B0GTW1;A0A2R8YDH4;A0A3B3ITE1;Q9UDY2;Q9UDY2-3;Q9UDY2-7	0.0714953	0.458165	0.065641	0.10235	0.0454356	0.0317148	0	0.273794	0.869378	1	0.9427	0.872231	0.990634	0.898598
A0A1B0GTX1;A0A1C7CYY6;Q6XZF7;Q6XZF7-2
A0A1B0GU24;Q9HCJ0;Q9HCJ0-2
A0A1B0GUA3;A0A6Q8PGG2;A0A6Q8PH45;A0A6Q8PHL8;Q96EK5	0	0	1	0	0	0	0	0	0	0	0	0	0	0
A0A1B0GUC2;A0A1W2PP33;C9J7I0	0	0	1	0	0	0	0	0	0	0	0	0	0	0
A0A1B0GUF4	0.48884	0	0.259841	0.644303	0.421823	1	0	0.603677	0.236448	0.978425	0	0	0	0
A0A1B0GUG6;Q86WH2	0	0	0	0	1	0.237301	0.72288	0	0.0683092	0	0	0	0	0
A0A1B0GUL3	0	0	0	0	0	0	0.792227	0.584791	0.277725	1	0	0	0	0.199741
A0A1B0GUL6;E9PEZ5;Q9UPP5;Q9UPP5-2
A0A1B0GUN5	0.309833	0	0.139633	0.0429987	0.0954768	0.247783	0.248938	0.317682	0.506424	0.609457	0.675833	0.668145	0.452434	1
A0A1B0GUN9	0.161417	1	0.134479	0.06094	0.0371987	0.190157	0.159718	0.26851	0.465335	0.503176	0.243743	0	0.278363	0.199432
A0A1B0GUS7	0.948331	1	0.308545	0.158388	0.165308	0	0.203966	0	0.135836	0.0179063	0	0	0.119332	0
A0A1B0GUZ2;P00797;P00797-2	1	0	0.267604	0.526375	0	0	0	0	0	0	0	0	0	0
A0A1B0GUZ7;Q14156;Q14156-2	0.0563555	0	0	0.118515	0	0.16205	0.327267	0.589906	1	0.802338	0.694948	0.85485	0.539615	0.970099
A0A1B0GV26;Q8WWZ3;Q8WWZ3-2	0	0	0	0.429571	0	0	1	0.700099	0	0	0	0	0	0
A0A1B0GV47;Q7Z4S6;Q7Z4S6-2;Q7Z4S6-4;Q7Z4S6-5;Q7Z4S6-6	0.468675	1	0.8779	0.550883	0.436849	0.285207	0.402013	0.205882	0.235888	0.171306	0.104044	0	0.0349789	0.250662
A0A1B0GV48;D6RBC4;Q8NAP3	0	0	0	0	0	0	0	0	0	0	0	0	1	0
A0A1B0GV57;Q9NYJ8
A0A1B0GV71;A0A1B0GW34;A0A1B0GWD3;B4DFF3;H3BNK7;H3BR00;O95086;Q13286;Q13286-2;Q13286-3;Q13286-4;Q13286-5;Q13286-7;Q2TA70;Q9UBD8	0	0	0	0	0	1	0.504364	0	0.250437	0.244817	0	0	0	0.309602
A0A1B0GVD5;A0A1B0GVP3;A0A1B0GW44;A0A1B0GWE8;P07339	0.528836	0	0.0770146	0.16529	0.29328	0.701937	0.761387	1	0.552593	0.380271	0.209214	0.138519	0.105934	0.288169
A0A1B0GVG4	0	1	0	0	0.72484	0	0	0	0	0	0	0	0	0
A0A1B0GVI7;A0A2R8Y7G1;P35869	0.562799	1	0.365216	0.310997	0.282465	0.299098	0.21743	0.166482	0.207345	0.14668	0.143402	0	0.0848166	0
A0A1B0GVL3;Q05086;Q05086-2;Q05086-3	0.467726	0.693918	1	0.718879	0.710973	0.486533	0.318536	0.193944	0.13736	0.0917964	0.0123403	0	0	0.141816
A0A1B0GVV3;Q5EBL4	0.592921	1	0.333615	0.177564	0.379008	0.270021	0.192955	0.137786	0.172255	0.0612046	0.0326895	0	0.0201467	0
A0A1B0GVV8	0	0.95652	0	0.140646	0.215392	0.462541	0.10176	1	0.0777592	0.562377	0.312914	0.0629348	0.223316	0.278897
A0A1B0GW05	0	0	0.00581701	0	0.0208014	0.146475	0.1989	0.299889	0.445625	0.438791	0.460299	1	0.384962	0.429637
A0A1B0GW23;Q03154	0.58068	1	0.453705	0.3829	0.341786	0.259797	0.181269	0.0963597	0.0445916	0.0307619	0.0162237	0	0.0199483	0.0270773
A0A1B0GW38	0.578626	1	0.400326	0.375444	0.647092	0.212616	0.15683	0.0452452	0.0654318	0.0658607	0	0	0	0
A0A1B0GW41;E9PEN0;Q8WYH8;Q8WYH8-2	0	0	0	0	0	0	0	0	0	0	0	0	0	1
A0A1B0GWB2	0	0	0	0	0	0	0	0	1	0	0	0	0	0
A0A1B0GWD8;Q9C093-4	1	0	0	0	0	0.0752331	0.316234	0	0	0	0	0.0945609	0.151395	0.154468
A0A1B0GWI2;O75503	0.0695314	0	0	0	0	0.222371	0.446706	0.31418	0.32818	0.247085	0.311993	0.479449	0.114252	1
A0A1B0GXA9;C9JHJ7;Q04771	0	0	0	0	0	0	0	0	0	1	0	0	0	0
A0A1B1UZQ1;A0A3B3IRU7;A0A3B3ISJ6;A0A3F2YP58;A0A5F9ZHF9;A0A5F9ZI67;Q9Y233;Q9Y233-2	0	0	0	0	0	0	0	0	0	0	1	0	0	0
A0A1C7CYW7	0	0	0	0	0	0	0	0	0	0.557486	1	0	0	0
A0A1C7CYX0	0	0	0	0	0	0.174455	0.229992	0.580255	1	0.55889	0.316986	0	0.293393	0.466244
A0A1C7CYX8	0.257183	1	0.104057	0.230122	0	0.153822	0	0.039205	0	0	0	0	0	0
A0A1C7CYX9	0.74502	1	0.780663	0.577532	0.517294	0.372718	0.420886	0.206287	0.137759	0.0842127	0.0312938	0	0.0511945	0.0777689
A0A1C7CYY4;I3L1K6;I3L532;P12829
A0A1D5RMN4;P23945;P23945-2;P23945-4	0	0	0	0	0	0.413379	0	0.325417	0.133633	0.523878	0	1	0.445694	0
A0A1P0AYU5;Q9BWM7	0	0	0	0	0	0	0.245567	0.0208571	0.244613	0.468353	0.890042	1	0.540047	0.605512
A0A1W2PNF0;A0A1W2PNY6;A0A1W2PPE6;A0A1W2PPG9;A0A1W2PPH4;A0A1W2PQ13;A0A1W2PQ60;A0A1W2PQD6;A0A1W2PQH2;A0A1W2PQL8;A0A1W2PR66;A0A1W2PRN3;A0A1W2PRT7;A0A1W2PS45;A0A1W2PS77;A0A1W2PSA9;A0A1W2PSD1;Q9Y2D2;Q9Y2D2-2;Q9Y2D2-3	0.051699	0	0.0342934	0.0248704	0.0737511	0.156629	0.274961	0.252993	0.226063	0.372584	0.3667	1	0.743527	0.452988
A0A1W2PNH8;A0A1W2PNQ8;A0A1W2PNR0;A0A1W2PNW5;A0A1W2PPB6;A0A1W2PPR7;A0A1W2PQA9;A0A1W2PQP4;A0A1W2PQZ1;A0A1W2PS19;K7ELE1;K7EPJ2;O95427	0	0	0	0	0	0	0	0.412127	1	0	0	0	0.363371	0
A0A1W2PNP0;Q969N2;Q969N2-5	0	0	0	0	0.143829	0.39549	0.521067	0.901771	0.993481	0.782029	0.9588	1	0.839038	0.704089
A0A1W2PNR9;Q9Y5U9	0	0	0	0	0.115184	0.416009	0.875763	0.39798	1	0.721471	0	0.156783	0	0.0905839
A0A1W2PNT1	0	0.299993	0	0	1	0.446717	0.354212	0	0	0	0	0	0	0
A0A1W2PNU4;A0A286YES2;F8VYC4;P0DJD0;P0DJD1	0	0	0	0	0	0	0	0	0.200903	0.464103	0.30551	0.504498	1	0
A0A1W2PNV4	0.681656	1	0.71031	0.481579	0.415957	0.156737	0.157588	0.0583621	0.125832	0.0763202	0.0486925	0.0512464	0	0.0603523
A0A1W2PNW1;A0A494C0T4;H0YJH6;P42226;P42226-3	0.983404	1	0.711595	0.46366	0.490059	0.376052	0.432294	0.240028	0.141664	0.0831229	0.0565723	0	0.0729578	0.0944548
A0A1W2PNX8;Q9H3U1;Q9H3U1-2	0.716935	1	0.572369	0.496926	0.335299	0.208888	0.154014	0.155578	0.124854	0.103567	0.0880218	0	0.100137	0.00256799
A0A1W2PNY5;A0A1W2PPP6;A0A1W2PQA7;A0A1W2PQZ6;A0A1W2PR08;A0A1W2PRF0;A0A1W2PRF5;A0A1W2PRJ0;A0A1W2PS93;A0A1X7SBS0;G5E9D4;Q96EB1;Q96EB1-2;Q96EB1-3	0	0	0	1	0.388864	0	0	0	0	0	0	0	0	0
A0A1W2PNZ9;H7BXU7;Q15652;Q15652-3
A0A1W2PP04;Q5JY83;Q9Y388	0	0	0	0	0	0	0	0	0	0	0	0	0	1
A0A1W2PP11;Q9H300	0	0.386372	0.426098	0.0802375	0.226106	0	0.0791364	0.055833	0.212813	0.229543	0.624352	1	0.480633	0.439235
A0A1W2PPB7;E9PH70;H0Y8E4;Q9ULH0;Q9ULH0-2;Q9ULH0-4	0	0	0	0	0	0.437306	0.478188	0.536201	0.702725	0.596854	0.148642	1	0	0.621696
A0A1W2PPC6;Q9H3H5;Q9H3H5-2	0.0493926	0	0	0.0320796	0.119891	0.392848	0.350916	0.679005	0.576098	0.426109	1	0.963907	0.552486	0.443153
A0A1W2PPD8
A0A1W2PPH1;P23368	0.0944509	0.233546	0.0448727	0.0129257	0.044286	0	0.0259366	0.0517368	0.0891598	0.210856	0.719971	1	0.712717	0.438112
A0A1W2PPH6	0	0	0	0	0	0	0.333541	0.0913321	0	0	0.675846	0.840127	0.728104	1
A0A1W2PPI5;Q5JSJ4	0	0	0	0	0	0.747455	0.238915	0.730822	1	0.318816	0	0	0	0
A0A1W2PPJ5;J3QT51;J3QT87;Q96SW2;Q96SW2-2	0	0	0.840511	0.400037	1	0	0	0	0	0	0	0	0	0
A0A1W2PPS1;Q00839;Q00839-2	0.1838	0.660194	0.269493	0.254537	0.0842454	0.0776277	0.0331379	0.140511	0	0.0953126	0.0678507	0.315393	0.474096	1
A0A1W2PPT3;P52740;P52740-2	0	0	0	0	0	0	0	0	0	0.206328	0	1	0	0
A0A1W2PPV0;A0A1W2PQG5;Q9Y5P2;Q9Y5P2-2	0	0	0	0	0	0	0	0	0.620418	1	0	0	0	0
A0A1W2PPZ5;P23193	0.36483	1	0.0751028	0.107206	0.125145	0.114835	0.0611609	0.0587991	0.0692138	0.0967644	0.0546942	0.0542932	0	0.0290982
A0A1W2PQ75;O15488;O15488-2;O15488-3;O15488-4;O15488-6	0	0	0	0.00703709	0.0028244	0.0404375	0.0444479	0.050482	0.0509419	0.0587743	0.0673889	0.275844	0.332741	1
A0A1W2PQD2;Q9UBB4	0.697141	1	0.436704	0.347789	0.377214	0.249007	0.183013	0.0898054	0.0445863	0	0	0	0	0.0217472
A0A1W2PQE7	0	0	0	0	0	0	0	0	0.716708	0.557663	1	0	0	0
A0A1W2PQM2	0.643941	0.730247	0.86102	0.900747	0.843499	0.385419	1	0.432763	0.214234	0.0806474	0.45923	0.108383	0.318701	0
A0A1W2PQM3	0.0838749	0	0.062439	0.096647	0.227468	0.59995	1	0.625969	0.535386	0.410744	0.282912	0.310124	0.379552	0.346761
A0A1W2PQM5;A0A1W2PR19;A0A1W2PRG0
A0A1W2PQN4	0	0	0	0	0	0	1	0	0	0	0	0	0	0
A0A1W2PQP6;Q9BWL3;Q9BWL3-2;Q9BWL3-3;Q9BWL3-4;Q9BWL3-5;X6R6F3;X6R6S3	0	0	0	0	0	0	0	0.35759	0.769477	0.822271	0.651519	0	0.854924	1
A0A1W2PQQ5	0	0	0	0	0	0	0	0	0	0.66887	0	0	1	0
A0A1W2PQS6	0	0.186901	0.169482	0.236108	0.225476	0.26112	0.404548	0.424823	0.493825	0.505543	0.738353	1	0.961433	0.48779
A0A1W2PR09;A0A1W2PRL5;A0A1W2PRM0;F5GYH1;Q8NC96	0.623484	0.850728	0.303304	0.0147554	0.57543	0.657438	0.567441	0.512882	0.637779	0.933482	0.998777	1	0.467414	0
A0A1W2PR17;F2Z2I2;Q16875;Q16875-2;Q16875-3;Q16875-4;Q5VX20;Q5W015	0.646407	1	0.689219	0.688578	0.549736	0.303253	0.111291	0.109917	0	0.0500782	0	0	0	0
A0A1W2PR28;A0A1W2PRJ5;A0A6Q8PFR7;Q5JU85;Q5JU85-3	0	0	1	0.817143	0.173396	0.335394	0.0853312	0.173208	0.214578	0.138184	0	0	0	0
A0A1W2PR41;Q9Y6Q6;Q9Y6Q6-2;Q9Y6Q6-3;Q9Y6Q6-4;Q9Y6Q6-5	0	0	1	0	0	0	0	0	0.500566	0	0	0	0	0
A0A1W2PR46;A0A1X7SBR3;P14136;P14136-2;P14136-3	0	0	0	0	0	0	0.100796	0.073669	0.662072	0.682793	0.712667	0.655842	0	1
A0A1W2PRB8	0	0	0	0	0	0	0	0	0.200531	0.136572	0.171306	0.602854	0	1
A0A1W2PRI9;E9PNW5	0	0	0	0	0	0	0.671175	1	0.834253	0.175422	0.238277	0	0	0
A0A1W2PRV5;E7EQZ4;Q16637;Q16637-2;Q16637-3;Q16637-4	0	0	0	0	0	0	0	1	0	0	0	0	0	0
A0A1W2PRW4;P53816	1	0.75386	0.425233	0.356206	0.435569	0.320893	0.562749	0.140841	0.0785302	0.383346	0.233085	0.877891	0	0.240624
A0A1W2PS05;Q8NEB9	0.695733	0.57773	0.819071	1	0.869635	0.688916	0.419726	0.461369	0.342789	0.317604	0.242119	0	0.0323538	0.134879
A0A1W2PS43;Q14108	0.643513	0.268568	0.302535	0.341459	0.380544	1	0.861934	0.844545	0.523837	0.323503	0.253488	0.194488	0	0.157242
A0A1W2PS52
A0A1W2PS94;A0A2R8Y358;Q9BXT5	0	0	0	1	0	0	0	0	0	0	0	0	0	0
A0A1X7SBT1;Q9H1D0;Q9H1D0-2	0.0891747	0.0858348	0	0	0.0486653	0.0125357	0	0.0230834	0.0282127	0	0.686198	0.777773	0.597138	1
A0A1X7SBT7;O95502	0	0	0	0	1	0	0	0.963922	0	0	0	0	0	0
A0A1X7SBY3;H0Y860;Q9P246;Q9P246-2	0	0	0	0	0	0.144406	1	1	0.872772	0	0	0	0	0.748107
A0A1X7SBZ2;A0A5H1ZRQ2;Q92841	0	0.00536749	0.0792397	0.131153	0.164209	0.318932	0.332643	0.441754	0.543763	0.480845	0.443429	0.72188	0.639586	1
A0A1Y0BRN3;A0A590UJ40	0.587242	1	0.641581	0.553852	0.352019	0.219777	0.205061	0.166945	0.235884	0.153574	0.102405	0.10868	0	0.394763
A0A286YEV4;A0A286YEV9;A0A286YEW8;A0A286YEX1;A0A286YF00;A0A286YF45;A0A286YF51;A0A286YF73;A0A286YFC6;A0A286YFE7;A0A286YFF5;A0A286YFH9;A0A286YFM2;B7Z2B2;E7ERQ4;Q8NHS3	0	0	0	0	0	1	0	0	0	0	0	0	0	0
A0A286YEX4;P08651;P08651-5;P08651-6	0.0293887	0.0617618	0	0.0391855	0.093197	0.101536	0.0907664	0.195917	0.176373	0.192676	0.28182	0.296406	0.152521	1
A0A286YF17;A0A286YFD0;P42898;P42898-2;Q5SNW7	0.684911	1	0.539962	0.576661	0.44859	0.212685	0.218574	0.0891825	0.0221592	0.0692918	0	0	0	0
A0A286YF22;O43175	0.643405	1	0.55354	0.46598	0.444246	0.233328	0.201692	0.130834	0.0528222	0.0486493	0.0161089	0	0.0141977	0.0185662
A0A286YF37;Q9UK22	1	0.678369	0.200549	0.156668	0.391233	0.0764666	0.591979	0.0415186	0.154508	0.0526772	0	0.000646871	0.0054244	0
A0A286YF93	0	0	0	0	0	0	0	0	0	0.0895486	0	0	1	0
A0A286YFA5;Q8NGQ1	0	0	0	0	0	0	0	1	0	1	0	0	0	0
A0A286YFE3;A0A286YFF7;A0A286YFL8;A0A2C9F2P4;P50897;Q5T0S4	1	0	0.224666	0.274077	0.383859	0.600532	0.587037	0.802016	0.353003	0.404315	0.570086	0.49741	0.190386	0.545919
A0A286YFF8;Q7Z3U7;Q7Z3U7-2;Q7Z3U7-5;Q7Z3U7-6	0.679871	1	0.882775	0.801717	0.485334	0.334219	0.256403	0.17009	0.0922263	0.0473535	0	0.0223031	0.0173253	0.0751731
A0A2Q2TTZ9;P01593;P01594	0	0	0	0	0	0	0	0	0	0	0	0	0	1
A0A2Q3DQE3;Q13555;Q13555-10;Q13555-11;Q13555-2;Q13555-3;Q13555-4;Q13555-5;Q13555-6;Q13555-7;Q13555-8;Q13555-9;Q5SWX3;Q8WU40	0.245012	0	1	0.935366	0	0	0.753166	0.567648	0.373179	0	0	0	0.452231	0.343112
A0A2R8Y2A8	0.602062	1	0.695456	0.491844	0.179331	0.193737	0	0.0144204	0.0667218	0.0938291	0.462016	0.486086	0.362459	0.244554
A0A2R8Y2F6;P42336	0.141176	0.185215	0.00327396	0.174702	0.146836	0	0.0823637	0.0112682	0.180508	0.265164	1	0.435454	0.163693	0.28999
A0A2R8Y3M9	0.0889472	0.0400843	0	0.0224852	0.106856	0.51166	0.620713	1	0.718721	0.573145	0.506027	0.441783	0.502304	0.308529
A0A2R8Y3N3;A0A2R8Y5P7;A0A2R8Y6I1;P49590;P49590-2	0	0	0	0.0414329	0	0	0	0	0	0.0794779	0.690496	1	0.620096	0.400821
A0A2R8Y3S0;A0A2R8Y511;A0A2R8YCL0;Q96JX3	0	0	0	0	0	0	0	0	0.221389	0	0.0428757	0.933895	0.547172	1
A0A2R8Y440;A0A2R8Y4P4;A0A2R8Y7S2;A0A2R8YG32;A0A2R8YGG3;P51532;P51532-2;P51532-3;P51532-4;P51532-5;Q9HBD4	0	0.118902	0.0417733	0.109062	0.050109	0.0440879	0.0487831	0.0465434	0.0805797	0.0880288	0.114239	0.213612	0.127971	1
A0A2R8Y455;A0A2R8Y600;A0A2R8Y620;A0A2R8Y7U2;Q86VX2;Q86VX2-2	0.374859	0.198948	0.453398	0.66163	0.831092	1	0.690826	0.615012	0.305577	0.24052	0.293617	0.00696507	0.18745	0
A0A2R8Y471;Q12967;Q12967-2;Q12967-3;Q12967-4;Q12967-5;Q12967-6;Q5T7U6	0	0	0	0	0	0	0.0148992	0.069851	0.175422	0.201551	0.480803	1	0.299943	0.291359
A0A2R8Y478;A6NNI4;G8JLH6;P21926	0	0	0	0.274906	0	0	1	0	0	0	0	0	0	0
A0A2R8Y484;Q08722;Q08722-2;Q08722-3;Q08722-4	0	0	0	0	0	0	0	1	0	0	0	0	0	0
A0A2R8Y491;E7EWD9;O95718;O95718-1;O95718-2	0.223752	0.595093	0	0.244114	0.168101	0	0.0209831	0.0564642	0.0818964	0.0477509	0.206436	0.294592	0.0938728	1
A0A2R8Y4C2;A0A2R8Y596;A0A2R8Y5C9;A0A2R8Y5E4;A0A2R8Y6M6;A0A2R8Y8C4;A0A2R8YFK2;A0A2R8YFS8;P56945;P56945-2;P56945-3;P56945-4;P56945-5;P56945-6;P56945-7;P56945-8	1	0.983231	0.727556	0.714526	0.487913	0.23545	0	0	0	0	0	0	0	0
A0A2R8Y4F5	1	0	0.848468	0.156196	0.429442	0.169427	0.0636738	0	0.21321	0	0.0844658	0	0	0.05568
A0A2R8Y4I8;A0A2R8Y7K2;A0A2U3TZR0;Q9UBP0;Q9UBP0-2;Q9UBP0-3;Q9UBP0-4	0	0.409625	0.292787	0.429887	0.808145	0.75496	0.866551	0.861702	0.669426	0.572686	1	0.412834	0.94209	0.835038
A0A2R8Y4K2;Q9Y2S2	0.853599	1	0.488454	0.428548	0.325846	0.154745	0.0976269	0.09382	0.0324527	0.0330075	0.00778885	0	0.00557321	0.0369543
A0A2R8Y4M1;A0A2R8Y615;A0A2R8YGW2;A0A5F9ZHK1;Q9NZA1;Q9NZA1-2;Q9NZA1-3	0	0	0	0	0	0	0	0.528505	0.854851	1	0	0	0	0
A0A2R8Y4T1	0.240904	0.136923	0	0.0531493	0.0773375	0.0968228	0.2182	0.331354	0.615074	0.697057	0.657828	0.797346	0.603023	1
A0A2R8Y4U1;A0A2R8YDF7;O75164	0	0	0	0	0	0	0	0	0	0	0.110297	0	0	1
A0A2R8Y4U4	0	0	0	0	0	0.355433	1	0.706785	0.765025	0.755335	0.509007	0	0	0.136009
A0A2R8Y4V0;A0A2R8Y4Z4;A0A2R8Y5D8;A0A2R8Y6Q0;A0A2R8YDG0;Q09428;Q09428-2	0	0	0	0	0.00616047	0	0.0631126	0.0241662	0.51937	0.588401	1	0.469361	0.755958	0.420076
A0A2R8Y4W0	0	0	0	0	0	0	0	0	1	0.0221105	0	0.911874	0	0
A0A2R8Y4W1;A0A2R8Y860;A0A2R8YD46;A0A2R8YFE3;A0A2U3TZS7;P43004;P43004-2	0.158863	0	0.020232	0.113944	0.0909383	0.235406	0.375139	0.438812	0.748729	0.875382	0.876355	1	0.512107	0.963818
A0A2R8Y4W2;A0A2R8YE63;Q12929	0.361669	1	0.0077428	0.146636	0.0859033	0.124531	0.0342552	0	0.136226	0.087898	0.155953	0.26247	0.000400126	0.819773
A0A2R8Y4Y7;A0A2R8YFW4;Q9UQ90	0.454152	0	0.422228	0.423517	0.0286251	0.171019	0.0600077	0.111867	0.215781	0.261648	0.619009	1	0.592066	0.489949
A0A2R8Y4Z0;A0A2R8Y7W5;A0A2R8YF61;Q14004;Q14004-2	0.608016	1	0.246277	0.195616	0.316953	0.184955	0.330808	0.134479	0.155191	0.0667697	0	0.120694	0.166493	0.222325
A0A2R8Y4Z6;J3KMZ7;Q9H0H0
A0A2R8Y4Z8	0.540459	1	0.301535	0.370054	0.33651	0.816177	0.860954	0.709139	0.463295	0.254756	0	0.177821	0.170502	0.918686
A0A2R8Y524;A0A2R8YEC9;E9PFW2;O00462	0.583061	0	0.147452	0.335483	0.570175	0.71797	0.921787	0.769107	0.878562	0.781947	0.641363	0.782118	0.906712	1
A0A2R8Y543;A0A2R8Y5A3;A0A2R8Y804;A0A2R8YCH5;B4DGU4;P35222	0.0626626	0.0192856	0	0.0083209	0.0298504	0.0697062	0.0936886	0.306044	0.66884	0.55205	0.560178	0.577528	0.406522	1
A0A2R8Y544;Q9BR61	0.628039	1	0.221068	0.191358	0.0361132	0.137138	0	0	0	0	0	0	0	0
A0A2R8Y549;Q8NI35;Q8NI35-2;Q8NI35-3;Q8NI35-4	0.479965	1	0.0772045	0.208066	0	0.203022	0.0724018	0.267069	0.317753	0.317218	0.415287	0.491931	0.253974	0.229376
A0A2R8Y566;Q9P260-2	0.579951	1	0.609164	0.420714	0.35903	0.258228	0.248125	0.144088	0.103072	0.0769478	0.0250293	0.00491958	0	0.147873
A0A2R8Y595;A0A2R8YFL0;P49711	0	0	0	0	0	0.0349207	0	0.047977	0.0396183	0.0651799	0.164353	0.295606	0.247351	1
A0A2R8Y5A0;A0A2R8YD58;E7EU96;P68400	0.409881	0.618786	1	0.727255	0.361235	0.137618	0.0583602	0.0536531	0.159065	0.0606053	0.0317535	0	0.0550125	0.572804
A0A2R8Y5D3;A0A2R8YEZ4;O15160;O15160-2	0.532642	1	0.752765	0.59609	0.532654	0.532302	0.404014	0.380768	0.345815	0.242373	0.326353	0.201307	0	0.814327
A0A2R8Y5F1;A0A2R8Y7C8;A0A2R8Y7X5;A0A2R8YDR3;A0A2R8YDZ2;A0A2R8YGD6;A0A2R8YGU4;H3BMQ0;P49815;P49815-2;P49815-3;P49815-4;P49815-5;P49815-6;P49815-7;X5D2U8	0.406718	1	0.706402	0.945383	0.499018	0.267725	0.254638	0.229954	0.194211	0.238986	0	0.253798	0.259514	0.0383375
A0A2R8Y5J4;Q9BYG8
A0A2R8Y5K2;Q96LT7	0.520529	0.119951	0.107636	0.578995	0	0.403673	0	0.575308	1	0.831214	0.232836	0	0	0.612889
A0A2R8Y5N2;A0A2R8Y5S3;A0A2R8YFV7;Q92574;Q92574-2	1	0.456178	0.746739	0.411005	0.466683	0.341709	0.365687	0.278753	0.228163	0.181634	0.0849188	0	0.0950511	0
A0A2R8Y5P9;Q8TF72
A0A2R8Y5Q8;A0A2R8YHI9;Q15813;Q15813-2	0.34762	0.313746	1	0.55026	0.406784	0.103449	0.158696	0.375393	0.0278168	0.305111	0.954572	0.732101	0	0.4078
A0A2R8Y5Y7;D6RAN4;P32969	0.0454991	0	0.152192	0.311134	0.205402	0.331883	0.363286	0.448122	0.539185	0.567022	0.767218	1	0.841466	0.610646
A0A2R8Y605	0	1	0.782822	0.58885	0.452068	0.422154	0	0.943183	0.694258	0.213432	0.3021	0	0	0
A0A2R8Y635;A0A2R8YDN7;Q9H7F0;Q9H7F0-2
A0A2R8Y640	0	0.957318	0	0	0.15715	0	0.12623	0	1	0.424922	0.307014	0	0.295684	0.161118
A0A2R8Y648	0.563802	1	0.430136	0.452743	0.377006	0.147457	0.0247615	0.0154645	0.00544669	0	0.0214324	0	0	0
A0A2R8Y651;Q8TF64	0	0	0	0	0	0	0	0	1	0	0	0	0	0
A0A2R8Y653;Q9BZX2	0.571867	1	0.635902	0.332479	0.237264	0.204258	0.316403	0.221186	0.289088	0	0.321283	0.131433	0.135835	0.12456
A0A2R8Y661;A0A2R8YGD3;Q9Y4G8	0.378002	1	0.270754	0.264365	0.114381	0.0653113	0	0.184925	0.0861297	0.167376	0.324732	0.166515	0.0207551	0.283117
A0A2R8Y6D0	0	0	0	0	0	0	0	0.170093	0.790863	1	0.350563	0	0.117578	0.637739
A0A2R8Y6I6;A0A2R8Y6L5;A0A2R8YDF3;Q13627;Q13627-2;Q13627-3;Q13627-4;Q13627-5	0.536692	0.468467	0.650469	0.80808	1	0.218615	0.537651	0.114438	0.109229	0.233923	0.288585	0	0	0.33445
A0A2R8Y6P2;A0A2R8YDC4;A6NFE3;C9J654;J3KR48;J3KR52	0	0	0.381949	0.145224	0	1	0	0	0.517749	0	0	0	0	0
A0A2R8Y6W8;P19447	0	0	0	0	0	0	0	0.0662313	0.288356	0.374913	0.450632	0.145004	0.304874	1
A0A2R8Y6Y7;A0A2R8YDQ9;Q9P2R7;Q9P2R7-2	0.0809887	0.0731292	0.0322469	0.0129277	0.0175032	0.00403646	0	0.0123549	0.0430341	0.147946	0.692824	1	0.685706	0.358229
A0A2R8Y783	0.207006	0.229969	0	0.0714596	0	0.19734	0	0.170327	0.697014	1	0.761403	0.395031	0.401094	0.105984
A0A2R8Y7B4	0.905516	0	0.861178	1	0	0	0.318533	0	0	0.139902	0	0	0	0
A0A2R8Y7D5	0	0	0	0	0	0	0	0	0	0	0	0.724295	1	0.589286
A0A2R8Y7E6;A0A5F9ZHX3;A0A5F9ZI57	0	0	0	0	0	0.223085	0.0253727	1	0.750823	0.926738	0.316281	0	0	0
A0A2R8Y7I9;A0A2R8Y855;A0A2U3TZQ7;B4DGM3;J3QKS7;Q969G3;Q969G3-2;Q969G3-4;Q969G3-5	0.0739142	0.246813	0.0460944	0.0657215	0.0435012	0	0.0115578	0.00504514	0.0489994	0.0603017	0.176807	0.249733	0.195299	1
A0A2R8Y7J6;A0A2R8YD89;A0A2R8YEZ2;H3BNF9;H3BS01;Q9Y2V0;Q9Y2V0-2	0	0	0	0	0.70972	0	0.396873	1	0	0	0	0	0	0
A0A2R8Y7P6;A0A5F9ZHW5;F8VQP2;Q99700;Q99700-4;V9GY86	0.240861	1	0.358905	0.295	0	0.235902	0.387163	0.483573	0.571587	0.426362	0.473826	0.610381	0.756724	0.0658195
A0A2R8Y7Q1;E7ETD6;E9PE19;F5GXF5;Q12830;Q12830-2;Q12830-4	0	0	0	0	0	0	0	0	0	0	0	0	0	1
A0A2R8Y7Q6;Q04864;Q04864-2
A0A2R8Y7R4;B2RUZ4;H3BS66	0.149418	0	0.280769	0.395188	0.592342	0.759407	0.843248	0.510176	0.488839	0.499668	0.571856	0.427672	0.343135	1
A0A2R8Y7T6;A0A3B3IRZ4;Q6DN90;Q6DN90-3	0.406479	1	0.36096	0.349692	0.225688	0.105531	0.168168	0.0751614	0.0605807	0.0150468	0.0353476	0	0.0385315	0.115906
A0A2R8Y7U0;H0Y770;O75140;O75140-1;O75140-4;O75140-9	0	0.634174	0.92174	0	0.118172	0.34771	0.314537	0.799208	0.635121	1	0.107518	0.342008	0.861785	0.0943046
A0A2R8Y7V5;H0Y850;P38398;P38398-4;P38398-7;P38398-8;Q5YLB2
A0A2R8Y7X9;P69891;P69892	1	0	0	0	0	0	0.674487	0	0.595651	0.382482	0	0	0	0
A0A2R8Y7Y4;Q8N8A2;Q8N8A2-2;Q8N8A2-4	0.500384	0.807081	1	0.717525	0.537906	0.347342	0.315909	0.0918574	0.0960056	0.0660915	0	0	0	0
A0A2R8Y811;P62263	0.0234558	0	0.185726	0.192533	0.210563	0.249539	0.306407	0.430747	0.724	0.582026	0.653899	0.929354	1	0.645854
A0A2R8Y840;Q9HCK8;Q9HCK8-2	0	0	0	0	0	0	0	0	0.0223169	0	0.0801523	0.119239	0.0701084	1
A0A2R8Y849;A0A2R8Y8A0;A0A2R8YD14;E7ETK0;P62847;P62847-2;P62847-3;P62847-4	0	0	0.280877	0.23477	0.221075	0.345716	0.259033	0.409435	0.628802	0.645761	0.675805	1	0.797638	0.411627
A0A2R8Y851;P62273;P62273-2	0	0	0.0648709	0.0428151	0.0471265	0.104345	0.383829	0.278496	0.321512	0.363899	0.604727	1	0.728694	0.278609
A0A2R8Y852;A0A2R8YDI1;P39880;P39880-2;P39880-3;P39880-4;P39880-5;P39880-6	0	0	0.0897435	0	0.151599	1	0.792345	0	0	0	0	0	0	0
A0A2R8Y880;Q7Z6E9;Q7Z6E9-2	0	0	0	0	0.289494	0.320807	0	0.345134	0.0466541	0.262111	0	0	0.0190346	1
A0A2R8Y8E0;A0A2U3TZI2;H7C560;P15056	0.529841	1	0.370767	0.280067	0.322617	0.290484	0.205776	0.0352543	0	0	0	0	0	0
A0A2R8YCJ8;Q5T2H3;Q9NVV5;Q9NVV5-1;Q9NVV5-3	0.137287	0	0.0701322	0.130922	0.221065	0.564014	0.836976	0.826593	1	0.648366	0.71415	0.694328	0.366984	0.329867
A0A2R8YCL1;Q13322;Q13322-3;Q13322-4	0.769505	1	0.612818	0.892904	0.621096	0.724723	0.538536	0.570921	0.461843	0.630838	0.0944295	0	0	0.795596
A0A2R8YCS7;Q9Y3Z3	0.445372	1	0.943911	0.666667	0.384856	0.403628	0.123691	0.179505	0.232949	0.150985	0	0.084582	0.139322	0.0344443
A0A2R8YD30;P11171;P11171-2;P11171-3;P11171-4;Q4VB86	0.311207	1	0.00580684	0.0278239	0.0337232	0	0.0721186	0.230381	0.421222	0.483475	0.433453	0.425334	0.309093	0.362368
A0A2R8YD63;Q92547	0.624445	0.742428	1	0.325494	0.256865	0.14081	0.281456	0.14888	0	0	0	0	0	0
A0A2R8YD85;Q96BY6;Q96BY6-3
A0A2R8YDB8;H7BXF5;Q9H0E3;Q9H0E3-3	0.49263	0.524818	0.318726	0.216659	0	0.138178	0.491957	0.213415	0.364143	0.20098	0	0.538763	0.724932	1
A0A2R8YDC7;A0A2R8YE40;A0A2R8YF99;A0A2R8YFQ8;A0A2R8YGK2;F8W7S1;Q8NAN2;Q8NAN2-2	0	0	0	0	0	0	0	0	1	0.262397	0	0	0	0
A0A2R8YDD5;P30531	0.373464	0	0.113906	0.214386	0.0592034	0.394697	0.275925	0.589861	0.895074	0.837359	0.629733	0.847726	0.525193	1
A0A2R8YDI5;O94823;O94823-2;O94823-3	0	0	0	0	0	0	0	0	0	0	1	0	0	0
A0A2R8YDL0;O75443	0	0	0.252336	0	0.126022	0.239334	0.240834	0.287537	0.248287	0.00166992	0	0	1	0
A0A2R8YDQ0;Q9H267	1	0.894021	0.790291	0.604302	0.44012	0.454833	0.172705	0.249619	0.367043	0.244507	0	0.732412	0.00336196	0.180961
A0A2R8YDR8;Q9BZD2;Q9BZD2-2
A0A2R8YDT1;P15104	0.734535	0.954067	1	0.868593	0.688834	0.460952	0.509789	0.289031	0.180972	0.110954	0.0972116	0	0.129081	0.105237
A0A2R8YE10;Q9NRW7	0.158148	0.0818015	0.199574	0.602951	0.428942	0.946461	1	0.753795	0.421688	0.416034	0.0406033	0	0.0608907	0.175969
A0A2R8YE69;P0CG41;Q8IX94	1	0.667412	0.114518	0	0.23529	0.408365	0.161012	0.0922263	0.0804871	0.103608	0	0	0.914507	0.439446
A0A2R8YE77;A0A2U3TZM1;O14936;O14936-3	0.0758545	0	0.0997721	0.0301219	0.0119766	0.118077	0.257256	0.332505	0.896388	0.67824	0.787719	0.633767	0.485349	1
A0A2R8YEA1;B5MCJ9;O15016;O15016-2	0	0	0.221205	0	0	0	0	0	0	0	0	1	0	0
A0A2R8YEH1	1	0	0	0.179417	0.244256	0.161216	0	0.0865677	0	0	0	0	0	0
A0A2R8YEI5;P52757;P52757-9	0.689155	1	0.451799	0.550496	0.661594	0.328572	0.352432	0.335822	0.183648	0.133114	0.186916	0	0	0
A0A2R8YEL6
A0A2R8YEM2;D6RG18;D6RHI7;P51946	0	0	0	0	0	0	0	0	0.563156	0	0.231052	0	1	0.243643
A0A2R8YEM9;O15050	1	0.242611	0.136792	0	0.0743163	0.0689705	0.0859284	0	0.0310149	0.142923	0.0630024	0	0	0
A0A2R8YEZ0;B7WP89;Q0P651;Q0P651-2;Q0P651-3;Q0P651-4	0	0	0	0	0	0	0	0	0	0.143566	0.477223	1	0.314735	0.0416581
A0A2R8YF49	0.557261	1	0.525174	0.892384	0.58665	0.37937	0.370917	0.347802	0.442926	0.203343	0.0151796	0	0.339279	0.603049
A0A2R8YF72;A0A3B3IRF0;A0A3B3IRT9;A0A3B3IRX5;A0A3B3ISI4;A0A3B3ISW5;A0A3B3ITJ8;A0A3B3ITL3;A0A3B3ITS6;A0A3B3IUE2;H7BYU4;Q9UL68;Q9UL68-4	0	0	0	0	0	0.00225951	0.0288143	0.0881095	0.192773	0.30369	0.511573	1	0.50261	0.150731
A0A2R8YFF1;Q8N302	0	0	0	1	0	0.445549	0	0.195331	0.208423	0.118026	0	0	0	0
A0A2R8YFG2;Q96T66	0	0	0	0	0	0	0	0	0.0854025	0.0423398	0.354301	1	0.627472	0.443699
A0A2R8YFH5;Q15437	0.398195	0.403001	0.734471	1	0.741089	0.719813	0.471151	0.367671	0.239434	0.112008	0	0.0333985	0.0971755	0.0875895
A0A2R8YFL3
A0A2R8YFN3;A1Z1Q3;A1Z1Q3-1	0.721561	1	0.433937	0.211591	0.222742	0.167504	0.065688	0	0	0	0	0	0	0
A0A2R8YFN7	0	0	0	0	0.211736	1	0.151558	0.350588	0	0.302614	0	0	0	0
A0A2R8YFW3;O60907;O60907-2	0.882193	1	0.792667	0.600525	0.393687	0.17484	0.323543	0.196772	0.0992645	0.0852496	0	0.206456	0.284106	0.71741
A0A2R8YFX0;Q969X2;Q969X2-2
A0A2R8YG42;B1ALK7;Q14155-1;Q14155-5	0.149554	0.56744	0.900064	1	0.829276	0.529675	0.270668	0.453965	0.36799	0.112744	0.165616	0	0.163613	0.113292
A0A2R8YGH5;H7C1E4;P61966	0.0196994	0	0.23546	0.408518	0.439252	0.975217	0.823936	1	0.711362	0.443292	0.355938	0.15301	0.135276	0.177876
A0A2R8YGW0;P51795;P51795-1	0	0	0	0	0	1	0.46099	0	0	0	0	0	0	0
A0A2R8YHG5;Q9BZV2	0	0	0	0.0569311	0	0.0973887	0.24552	0.673089	1	0.88046	0.940467	0.786113	0.6173	0.769288
A0A2U3TZH3;Q05639	0.704715	0	0	0	0	1	0	0	0	0.309948	0	0	0	0
A0A2U3TZK7	0.05485	0.179453	0.0678412	0	0.089955	0.042452	0.0448957	0.0287893	0.0799804	0.0312959	0.651364	0.373618	1	0.452341
A0A2U3TZL5;E9PNW4;P13987;P13987-2	0.307334	0.152126	0	0.101726	0.178768	0.450051	0.376748	0.569524	1	0.945345	0.702479	0.553792	0.330168	0.702339
A0A2U3TZN6	0	0	0	0	0	0	0	1	0.842754	0.242323	0	0	0	0
A0A2U3TZT9	0	0	0	0	0	0	0	0	0	1	0	0	0	0
A0A2U3TZU2;P06744	0.963541	1	0.929752	0.70341	0.511012	0.350519	0.27017	0.19658	0.0876622	0.0745645	0.00822006	0	0.00542939	0.0525668
A0A2U3TZV8;Q4KWH8;Q4KWH8-2;Q4KWH8-3;Q4KWH8-4	0	0	0.110455	0	0.56753	0.784147	0.598761	0.927544	0.789821	0.727289	0.562995	1	0.686851	0.494097
A0A2Y9D025;P56556;R4GN43	0.0218756	0	0	0	0.00324181	0.044374	0.0615427	0.121774	0.141182	0.213225	0.676148	1	0.424628	0.426239
A0A384DVU0;Q8IY17;Q8IY17-2;Q8IY17-3	0.0872279	0.412088	0	0.0411479	0.149759	0.346137	0.608878	0.63856	1	0.742139	0.402671	0.686941	0.465605	0.506841
A0A3B3IQ51;P36980;P36980-2;V9GYE7	0	0	0	0	0.0287341	0.17236	1	0.204918	0.250256	0.188968	0.111563	0.17649	0.100366	0
A0A3B3IRE4;Q8TCE6;Q8TCE6-2	0	0	0	0	0.222251	1	0.629251	0.496404	0.224858	0.0257291	0	0	0	0
A0A3B3IRI9;A0A3B3IRJ3;A0A3B3IRV1;A0A3B3IRZ0;A0A3B3IS37;A0A3B3IS68;A0A3B3ISJ4;A0A3B3IT04;A0A3B3IT30;A0A3B3ITZ3;A0A3B3IU52;A6NFW1;A6NGJ7;Q9BY41;Q9BY41-4
A0A3B3IRJ9;Q9Y2H2	0.35602	1	0.686522	0.771969	0.972649	0.646301	0.752442	0.330319	0.250163	0.207978	0	0.167251	0.0881223	0.165546
A0A3B3IRK5;Q9H2D1	0	0	0	0	0	0	0	0	0	0	0	1	0	0.955417
A0A3B3IRL2;O75629	0.581999	0	0.365821	0.175721	0.381904	0.450647	1	0.864757	0.680663	0.329679	0.459082	0.13692	0.396811	0.53318
A0A3B3IRL5;C9J381;P20839;P20839-2;P20839-3;P20839-4;P20839-5;P20839-6;P20839-7	0	0	0.830522	0.664308	0.860623	1	0.550411	0.289943	0.270756	0.163253	0	0	0	0
A0A3B3IRN8;A0A3B3ITX0;P24311	0.0111562	0	0	0.00356446	0.00832248	0.0297939	0.059396	0.0931529	0.157331	0.14752	0.591624	1	0.566488	0.68497
A0A3B3IRP9	0	0	0	0	0	0.771276	0	0.419077	0	0.304534	1	0	0	0
A0A3B3IRQ5	1	0	0	0	0	0	0	0	0	0	0	0	0	0
A0A3B3IRQ7	0	0	0	0	0	0	0	0	0	0.134193	0	1	0.660262	0
A0A3B3IRR1;A0A3F2YNY7;P08397;P08397-2	0.853323	1	0.427141	0.332178	0.298766	0.160339	0.182621	0.099183	0.0695769	0.0460748	0.0199923	0.000409756	0	0.049191
A0A3B3IRS4;A0A3B3IRX3;A0A3B3IS46;H0YHC1;Q71F56	0	0	0	0	0	1	0.308453	0	0.300347	0	0	0	0	0
A0A3B3IRT8;C9IZQ1;C9J3L8;C9J5W0;E9PAL7;P43307	0.00838318	0.000519485	0	0.00404855	0.00573357	0.0584243	0.0861202	0.16044	0.317795	0.385943	0.528913	1	0.772364	0.272533
A0A3B3IRU6;A0A3B3ISL2;Q9GZU2;Q9GZU2-2;Q9GZU2-4	0	1	0	0	0	0	0	0	0	0	0	0	0	0.231803
A0A3B3IRY8	0	0	0	0	0	0	0	0	0	0	1	0	0.671994	0
A0A3B3IRZ5;Q8IYE1	0	0	0	0	0	0	0	0	0	0	0	0.636327	1	0.605998
A0A3B3IS06;E7ETY2;Q13428-3;Q13428-7;Q13428-8	0.55617	1	0.234448	0	0.173656	0.226007	0.12811	0.18324	0.168061	0.220561	0.0988411	0.241017	0.278171	0.417766
A0A3B3IS13	0	0	0	0	1	0	0	0	0	0	0	0	0	0
A0A3B3IS24;C9JIR6;O75688;O75688-2;O75688-4	0.728108	1	0.225184	0.222649	0.307658	0.228057	0.214792	0.10148	0.120976	0.0949288	0.0632548	0	0.0215353	0.17346
A0A3B3IS40;A0A3B3ISE6;A0A3B3IT25;A0A3B3ITA8;A0A3B3ITA9;A0A3B3ITE7;A0A3B3ITJ7;B3KV94;Q9UGL1;Q9UGL1-2	0	0	0.536183	0.171742	0	0.277895	0	0.384324	0.139879	0	0	0	0	1
A0A3B3IS62;A0A3B3ITD6;A0A3B3ITI5;Q9Y672;S4R350	0	0	0	0	0	0.14968	0.3258	0.3494	0.633567	0.583669	0.749611	1	0.908157	0.529439
A0A3B3IS66
A0A3B3IS71;P06400	0	0	0	0	0	0	0.138507	0	0.126517	0	0	0	0	1
A0A3B3IS75;K7EIP0;K7EJD9;K7ESF2;P13686	0.140093	0	0.0593334	0.0426789	0.0969064	0.0790114	1	0.51927	0.801202	0.387015	0.322696	0.535957	0.171082	0.304594
A0A3B3ISA5
A0A3B3ISF0;Q659C4;Q659C4-2	0	0	0	0	0.126966	0.343513	0.373372	0.512459	0.419814	0.468436	0.482067	1	0.857695	0.388114
A0A3B3ISF9;P42892;P42892-2;P42892-3;P42892-4	0.112827	0	0.349709	0.455539	0.436716	1	0.980817	0.626986	0.497172	0.381384	0.304332	0.384338	0.40007	0.496986
A0A3B3ISG5;P14735	0.632058	1	0.816517	0.565409	0.38256	0.176071	0.124105	0.0580939	0	0.0100609	0.0667451	0.183492	0.100277	0.106633
A0A3B3ISG8	0.0151536	0	0	0.0135985	0.0159793	0.03044	0.0440181	0.0845624	0.17979	0.20961	0.618919	1	0.517456	0.382256
A0A3B3ISH6;Q86U38;Q86U38-2	0	0	0	0.531605	0.181142	0.408213	0.141692	0.193702	0.335701	0.312695	0	0	0	1
A0A3B3ISJ2;Q96KQ4	0.416499	0.654255	0	0.259941	0.100952	0.249343	0.216446	0.3143	0.771177	0.549341	0.53969	0.693165	1	0.821504
A0A3B3ISK7;Q6PI48	0	0.0721965	0.0636931	0.0307468	0.0360423	0.0191091	0.0664891	0.0583435	0.0947296	0.137404	0.369557	1	0.587203	0.666074
A0A3B3ISP1;A0A3B3ITU5;Q92625;Q92625-2	0	1	0	0	0	0	0	0	0	0	0	0	0	0
A0A3B3ISQ4;Q9H6S3	0.618337	1	0.493508	0.447506	0.370448	0.287643	0.353373	0.210378	0.199631	0.12716	0.0381172	0	0.0465825	0.0351724
A0A3B3ISR2;B4DPQ0;P00736	0.339004	0.204728	0.123207	0.100838	0.0973518	0.715663	0.549799	1	0.763222	0.484379	0.312028	0.725432	0.0400138	0
A0A3B3ISR7;E9PIF2;Q13206	0	0	0	0	0	0	0	0	0	0	0	0	0	1
A0A3B3ISS6	0	0	0	0	0	0	0.123205	0	0.716336	0.976219	1	0.271309	0.493899	0.117049
A0A3B3IST1;B5MD23;O75954	0	0	0	0	0	0	0.211106	0.742701	1	0.898615	0.282096	0.370463	0	0.730874
A0A3B3IST8;B9ZVM7;E7ENI6;E9PDL4;F8WBQ1;Q05084;Q05084-2;Q05084-3;Q6LCR0;Q8NDH6	0	0	1	0.376105	0	0.148946	0	0	0	0	0	0	0	0
A0A3B3ISU0;Q02487	0.173788	0	0	0	0	0.109237	0.0622293	0.578473	0.827953	0.827787	1	0.586526	0.392139	0.911873
A0A3B3ISV3;P02462	0.0581405	0	0	0.0132285	0.019875	0.0438572	0.0851406	0.117902	0.267319	0.423755	0.403691	0.660274	0.527671	1
A0A3B3ISV4	0	0	0.0681069	0	0	0.561303	0.460321	1	0.86405	0.484973	0.489006	0	0.185578	0.766281
A0A3B3ISV5;Q8N9N7	1	0	0.5415	0.495971	0.509141	0.699276	0.422394	0.797983	0.69907	0.715043	0.530031	0.260067	0.22777	0.108635
A0A3B3ISV8;A0A6Q8PF19;A0A6Q8PFS9;A0A6Q8PHH0;Q8IZF0	0	0	0	0	0	0	0.953256	0.357898	0.525726	0.481309	0	0	0	1
A0A3B3ISV9;O43414	0.873504	1	0.611543	0.490201	0.542694	0.37577	0	0.398203	0.257212	0.776177	0.306513	0.466366	0.397108	0.137817
A0A3B3IT21
A0A3B3IT28;A0A3B3ITE5;A0A3B3ITF7;A0A3B3ITW6;A0A3B3IU40;A0A3B3IUA1;A0A3F2YNW9;Q12756;Q12756-2;Q12756-3	0	0.0393108	1	0.606468	0.0109163	0	0	0	0	0	0	0	0	0
A0A3B3IT31;Q9NUN5;Q9NUN5-3	0.198223	0	0.24027	0.57883	0.613624	1	0.593903	0.914136	0.49994	0.365955	0.109597	0	0	0.394008
A0A3B3IT37;Q5SXQ3;Q5SXQ5;Q8IYK4	0	0	0	0	0	0	0	0	0	1	0	0	0	0
A0A3B3IT92;P33991	0.590882	1	0.79419	0.514197	0.365853	0.109755	0.231439	0.12421	0.0565796	0	0.11122	0.404376	0.534483	0.441618
A0A3B3ITH3;Q9P2X3	0.735881	1	0.577775	0.524961	0.573455	0.308037	0.290267	0.224318	0.111154	0.141815	0.143142	0	0	0.0339389
A0A3B3ITJ4	0	0	0	0	0	0	0	0.0885192	0	0.202825	0	0.14321	0.292535	1
A0A3B3ITK0;P35442	0.705931	1	0.329833	0.208423	0.198674	0.168607	0.105044	0.0247943	0.0158657	0.0335331	0.0334596	0	0	0.0115371
A0A3B3ITN0;Q86TP1	1	0.778224	0.505	0.439792	0.280074	0.194589	0.0604099	0.155167	0.0231658	0.0303071	0	0	0	0
A0A3B3ITN6;D6RBB0;O60683;O60683-2	0	0	0	0	0	0	0	0.103835	0.565622	0.433584	0.676329	1	0.399237	0.420508
A0A3B3ITP4;Q495G5;Q8IVH4	0.077463	0	0.000446488	0.0274435	0.00459417	0.0293137	0.0142261	0.0589713	0.0820831	0.150077	0.626165	1	0.576627	0.459638
A0A3B3ITT1	1	0.704084	0	0.142459	0.261308	0.182708	0.295615	0.203263	0.0155861	0.171963	0.779417	0.638017	0.207503	0.336542
A0A3B3ITT5;P47914	0	0	0.0489545	0.0670233	0.0894328	0.16678	0.233091	0.330331	0.394625	0.41092	0.776714	1	0.928768	0.556879
A0A3B3ITU8;A0A3B3IU04;A0A3F2YNW8;Q14643;Q14643-2;Q14643-3;Q14643-4;Q14643-5;Q14643-6;Q14643-7;Q14643-8	0.199286	0	0.116925	0.146471	0.337171	0.39075	0.575332	0.699282	0.86382	0.801347	1	0.829902	0.583111	0.816862
A0A3B3ITW1;P49841;P49841-2	0.823995	1	0.521966	0.410746	0.400975	0.233249	0.0941107	0.357895	0.296588	0.192084	0.0865982	0	0.17738	0.125254
A0A3B3IU24;Q92743	0	0	0	0	0	0	0	0	0	1	0	0	0	0
A0A3B3IU42;G5EA29;H0YDP6;H0YEL0;O14893;O14893-2;O14893-3	0	0	0.288833	0.866485	1	0.932243	0.923081	0.650451	0.710504	0.873853	0.600081	0.209929	0.567706	0
A0A3B3IU65;A9UHW6;A9UHW6-2;A9UHW6-3;J3KSU6;J3QLD1;J3QLJ5;J3QRZ6	0	0	0.702338	1	0.247538	0.594925	0.176199	0.260632	0	0.0837209	0.28369	0	0.122188	0
A0A3B3IU69;F8W717;O00423;O00423-3	0.361304	0.38327	0.815282	0.669893	0.82019	0.550341	1	0.443302	0.575378	0.461586	0	0	0	0
A0A3B3IUA2;B1AHD1;P55769	0	0.0204146	0.00261349	0.0114258	0.0256583	0.0300553	0.0448438	0.0602229	0.120831	0.126208	0.187739	0.290958	0.22703	1
A0A3B3IUB1;Q13144	0.574408	0.781792	1	0.703245	0.584603	0.162848	0	0.135881	0.360333	0.314642	0.154957	0.208148	0.391962	0.06822
A0A3B3IUB5;Q8TCT9;Q8TCT9-5	0.0613436	0	0.0187673	0.101925	0.201055	0.515913	0.578446	1	0.911058	0.760115	0.551152	0.691335	0.477695	0.430132
A0A3B3IUC4;A0A6Q8PFA9;P06280	0.266247	0.120725	0.110124	0	0.161895	0.168636	0.353335	0.373541	0.337409	0.238935	0.430911	0.406505	0.409769	1
A0A3B3IUD2;Q9BUK6;Q9BUK6-2;Q9BUK6-3;Q9BUK6-7	0.516752	1	0.662719	0.524379	0.417702	0.332358	0.227989	0.122445	0.173768	0.0752872	0.0436878	0.0459632	0	0
A0A3B3IUD4;P21453	0	0	0	0	0	0	0.640203	1	0.864598	0.90662	0	0	0	0
A0A3B3IUD7;Q14690	0.0828757	0.187289	0	0.074486	0.152694	0.252774	0.197953	0.0891633	0.170506	0.144952	0.204376	0.317214	0.317796	1
A0A494BWY4;Q6IEE7
A0A494BXY3;E9PLD3;E9PRG8	0	0	0	0	0	0.25409	0	1	0.433562	0.269829	0	0	0	0.652303
A0A494BZU6;A0A494BZW7;A0A494C002;A0A494C0P9;A0A494C0Q2;A0A494C0Q6;A0A494C0W0;A0A494C156;A0A494C1K5;A0A494C1N1;O95453;O95453-2	0	0	0.834753	0.469422	0	0	0	0	0	0	0	0	0	1
A0A494BZV4;A0A494C069;Q08AG5	0	0	0	0	0	0	0	0.0505541	0	0	0	1	0	0
A0A494BZZ6;P78549;P78549-2;P78549-3	0	0	0	0	0	0	0	0	0	0	0	0	0	1
A0A494C028;H0Y993;P35659	0.128793	0.234511	0.0242632	0	0.0112649	0.00816676	0.0440442	0.0361103	0.0974203	0.0943218	0.195948	0.465462	0.310654	1
A0A494C039	0	0	0	0	0	0	0	1	0	0	0	0	0	0
A0A494C066;B7Z4W5;Q16773	0.830808	1	0.415885	0.254961	0.312142	0.145762	0.139838	0.0544515	0	0.0904211	0.0126764	0.0212878	0.0171196	0.0734325
A0A494C068;A0A494C1K7;E9PGP6;Q9UGJ0;Q9UGJ0-2;Q9UGJ0-3	0.707119	0.754497	0.895229	1	0.781542	0.525562	0.673009	0.534603	0.540578	0.348024	0	0.0203117	0.1856	0.471621
A0A494C0C1
A0A494C0J7;Q08188	0	0	0	0	0	0	0	0	0.246149	0.0877962	0.186978	0	1	0.596499
A0A494C0K7;A0A494C0P0;Q6P2C8;Q6P2C8-2	0	0	0	0	0	0	0	0	0	0	0	0	0.0665921	1
A0A494C0M1;P52701	0.245026	0.533272	0.181041	0.263434	0.119676	0.105312	0.201901	0	0.0296002	0.0819929	0.24779	0.0238441	0.355699	1
A0A494C0M2;O95925-3;Q9BQY6;Q9BQY6-2	0.421602	0	0.596199	0	1	0.749269	0.645783	0	0	0	0	0	0	0
A0A494C0N4;H9KV93;Q7Z4L5	0	0	0	0	0	0	1	0	0	0	0	0	0	0
A0A494C0P1;P04150;P04150-10;P04150-2;P04150-3;P04150-6;P04150-8;P04150-9	0.415533	1	0.329389	0.304023	0.2075	0.190314	0.253762	0.0878308	0.0505421	0.0178869	0.00782109	0	0.0219324	0.0891974
A0A494C0Q3	1	0	0	0	0	0	0	0	0	0	0	0	0	0
A0A494C0R8	0.0126791	0.0349905	0.783586	1	0.615084	0.558824	0.422773	0.327677	0.211873	0.164958	0.0569744	0.0559792	0.128679	0
A0A494C0X7;D3DSM0;P05107	0.182398	0	0	0.146876	0.131913	0.533899	0.616866	0.900412	1	0.938498	0.813403	0.624148	0.508962	0.767314
A0A494C0Z5;Q9H082	1	0.399899	0.0232033	0	0.0116102	0.346379	0.249132	0.525512	0.275609	0.319757	0.46395	0.467004	0.533865	0.612802
A0A494C100;Q9UJA2;Q9UJA2-2	0	0	0	0	0	0	0	0	0	0.162429	0.243463	1	0.334164	0
A0A494C105;Q9H3U5;Q9H3U5-3;Q9H3U5-5;Q9H3U5-6	0.310538	0	0.314226	0.602467	0.394644	1	0.555234	0.942858	0.73733	0.427184	0.183613	0.0812044	0.112668	0.148374
A0A494C108;Q8N9T8	0	0	0	0	0	0	0	0	0	0	0	0	0.20479	1
A0A494C115;A0A494C1U4;K7N7A8;P29972;P29972-2;P29972-3;P29972-4	0	0	0	0	0	0.230853	0.584313	0.790811	1	0.823583	0.591414	0.472324	0	0.303636
A0A494C143;Q14689;Q14689-6	0.713808	0	0	1	0.610186	0.565631	0.332896	0.307942	0.341266	0.344405	0.188346	0.218583	0.247187	0.218078
A0A494C146;P50336	0.0797776	0	0.0196832	0.0431223	0.0399638	0	0.0571476	0.0600387	0.105596	0.147202	0.554136	1	0.723127	0.613013
A0A494C151;Q4UJ75;Q5CZ79;Q5CZ79-2;Q5SQ80;Q5TYW2;Q5VUR7
A0A494C164;P52630;P52630-4	0.848994	1	0.996515	0.924783	0.663293	0.447996	0.288394	0.263711	0.139361	0.143448	0.0404309	0.0347105	0	0.106187
A0A494C165;K7ES25;P12955	0.711202	1	0.538866	0.439002	0.362265	0.190488	0.209753	0.0846845	0.0519591	0.0360083	0.00969491	0	0.0275295	0.047602
A0A494C167;Q9UHD2	0.383226	1	0.896398	0.676427	0.485951	0.44612	0.250702	0.291407	0.33182	0.273568	0.277231	0.00302108	0	0.0938114
A0A494C172
A0A494C193;Q08E93	0	0	0	0	0	0	0	0.729178	0.629514	0.356337	0	1	0.310323	0
A0A494C1C4;P78552;P78552-2	0	0	0	0	0	1	0.544401	0.911522	0	0	0	0	0	0
A0A494C1F2;P35658;P35658-2;P35658-3;P35658-4;P35658-5	0.278559	0.774198	0.23131	0.144675	0.17061	0.0949192	0.22373	0	0.101014	0.218991	0.30423	0.505511	0.623648	1
A0A494C1J1;Q69YQ0;Q69YQ0-2	0.176214	0	0.0213158	0	0	0.0521848	0.302935	0.213378	0.525294	0.676108	0.743822	0.764602	0.496662	1
A0A494C1J8	0	0	0	0	0	0.95531	0	0	0.391846	0	0	0	1	0
A0A494C1L5;P50851-2	0.66637	0.991498	1	0.873623	0.558648	0.404906	0.285815	0.204329	0.118141	0.0815762	0	0.0745587	0.114941	0.0830403
A0A494C1M4;Q3SY69	0.326826	0.863317	1	0.784802	0.802224	0.0567719	0.289432	0.081824	0	0	0	0	0	0.0506284
A0A494C1N0;P26885	0.0538756	0.0528154	0	0.0278463	0.0594466	0.338302	0.661655	1	0.926276	0.636783	0.46139	0.733007	0.582828	0.3036
A0A494C1S7;Q9Y5Q9	0.506644	0.721723	0	0.121536	0.125098	0.162756	0.165992	0.140926	0.241709	0.137259	0.366621	0.4656	0.267358	1
A0A494C1T9;Q6ZRV2	0.406928	0	0.475855	0.254599	0.250323	0.144033	0.224766	0.19297	0.36153	0.379044	0.316438	0.525658	0.321203	1
A0A494C1V1;Q6ZNJ1;Q6ZNJ1-2;Q6ZNJ1-3	0	0	1	0.619894	0	0.508666	0.0436479	0.25349	0.178007	0.0873679	0.228086	0	0	0
A0A499FI31;Q15020;Q15020-4	0.607993	0.810494	1	0.839345	0.749684	0.218492	0.237517	0.205702	0.0539613	0	0.0288347	0.12432	0.015543	0.725341
A0A499FI48;P13667	0.0430264	0	0.000335922	0.0170363	0.0411824	0.221534	0.516767	1	0.882143	0.641739	0.528262	0.72294	0.656629	0.421893
A0A499FIS5;A0A499FJN1;A0A499FJS1;Q9BUB5;Q9BUB5-2;Q9BUB5-3	0.486993	0.280014	0.735406	0.435111	1	0.892833	0.639602	0	0	0	0	0	0	0
A0A499FIX8;A0FGR8-2;H7BXI1	0	0.283982	0.241336	0.214799	0.314923	0.519133	0.754437	0.935031	1	0.846919	0.84985	0.855498	0.516906	0.839173
A0A499FIY8;C9JC07;C9JZL8;Q96S97	0	0	0	0	0	0	0	0.34707	0.790713	0.774319	0.453766	0	0	1
A0A499FIZ0	0.342364	0.338271	1	0.884451	0.632962	0.39324	0.308782	0.163781	0.152204	0.121085	0.110808	0.0868146	0	0.340272
A0A499FJ41;K7ES72;Q13938;Q13938-3;Q13938-4	0	1	0	0	0	0	0	0	0	0	0	0	0	0
A0A499FJI4;O75592;O75592-2	0.674364	0.27065	1	0.314159	0.745713	0.446961	0	0.759999	0.0373121	0.390328	0.240812	0.115665	0	0.0846724
A0A499FJM4;P08684	0.119765	0	0.124028	0.152882	0.28401	0.533472	0.731814	1	0.969559	0.781392	0.457334	0.510741	0.416482	0.476794
A0A4V7I447;Q0VD83;Q0VD83-2	0	0	0	0	0	0	0	0	1	0	0	0	0	0
A0A4W8VYG7;A0A4W8W4R1;Q99674
A0A539;A0A589
A0A590PXD8;Q53SF7-3	0.482506	1	0.133701	0.104508	0.203986	0.108664	0.140864	0.119867	0.294192	0.217844	0.0147192	0.09232	0.0476141	0
A0A590UIU4;A0A590UJ09;A0A590UJ61;A0A590UJC8;A0A590UJF4;A0A590UJG1;A0A590UJH1;A0A590UJS0;A0A590UJT1;A0A590UK11;A0A590UK42;A0A590UK98;Q5VZ66	0.489016	0.81368	0.100628	0	1	0	0.110563	0.0900176	0.506009	0.0575577	0.0375585	0.184326	0.925892	0.169838
A0A590UJ36;A6NDB9	0.474417	0.885256	0	0.0211747	0.0460033	0.0985758	0.109557	0.344827	0.765681	1	0.84747	0.648775	0.463208	0.579006
A0A590UJ43;P48729;P48729-3;U3KPX3	0.201257	0.497128	0.830476	0.314543	0.324588	0.129466	0.158405	0	0.217669	0.109263	0.122352	0.23978	0.180772	1
A0A590UJ46	0	0	0	0.222448	1	0.396278	0.893603	0.317541	0.549516	0.472013	0.415414	0.472552	0.164758	0.515378
A0A590UJ50;A0A590UJR3;Q13616	0.576924	0.918109	0.975038	1	0.751279	0.443058	0.194693	0.277176	0.147897	0.127382	0	0.0445587	0.0426239	0.153946
A0A590UJ62;E7ETH1;Q14003	0	0	0.285967	0.168079	0	0	0	0	0.165555	0	0	0	1	0
A0A590UJ68;A0A590UJR5;A0A590UJS9;A0A590UKA8;Q12959;Q12959-3;Q12959-5;Q12959-6;Q12959-7	0.128962	0.0380274	0.00387714	0	0.0281659	0.0704788	0.256223	0.429024	0.844914	0.833336	0.78875	0.943138	0.779554	1
A0A590UJ73;A0A590UJW4;E7EQB3;Q9BSV6	0.312458	1	0.65449	0.242648	0.465683	0.466081	0.528213	0.153985	0.142688	0	0	0	0	0
A0A590UJA9;C9JCW7;C9JE12;Q9BVT8	0.0298366	0	0	0.0526414	0.0982231	0.401484	0.539927	1	0.799038	0.787309	0.559906	0.640429	0.521718	0.452646
A0A590UJB6	0	0	0	0	0	0	0.37835	0.593139	0.978547	1	0.954839	0	0.955533	0.281996
A0A590UJC7;A0A590UK51;O60733;O60733-2	0.915473	1	0.374268	0.365218	0.161591	0.226832	0.132549	0.0794446	0.131101	0.129394	0.0537616	0	0.101846	0.0475704
A0A590UJF0;P63092-3	0.31354	0.0879628	0	0.0662104	0.0743456	0.285333	0.320517	0.739015	1	0.871148	0.732983	0.526525	0.292995	0.73987
A0A590UJG2;Q9UPN3-2;Q9UPN3-3	0.72838	1	0.963778	0.765943	0.625131	0.0229567	0	0.150644	0.387876	0.437699	0.00854064	0.0455274	0.686088	0.368212
A0A590UJK3;Q14BN4;Q14BN4-2;Q14BN4-3	0	0	0.125223	0.138319	0.32457	0.458122	0.581744	0.851892	0.591117	0.738991	0.606154	1	0.548805	0.478548
A0A590UJK4;A0A590UJP7;A0A590UK01;A0A590UK80;Q13247;Q13247-3	0.0447165	0	0.186581	0.177662	0.187042	0.205094	0.334382	0.252793	0.242241	0.263978	0.267244	0.40007	0.479775	1
A0A590UJL0;P08842	1	0.951079	0.305792	0.377383	0.190372	0.0475375	0.191386	0.259907	0.107918	0.110758	0.118042	0.120358	0.0287557	0
A0A590UJN0;E7ETK1;E9PBA8;Q52LR7;Q9H2F5;Q9H2F5-2	0	0	0	0	0	0	0	0	0	0	0	0	0	1
A0A590UJS8;A0A5F9ZA98;B4DGL8;O75027;O75027-2	0.0190283	0	0.00231061	0.00934468	0.0123893	0.0419187	0.0474252	0.0817587	0.20861	0.272515	0.735177	1	0.523682	0.43867
A0A590UJW0;A0A590UKC9;P20585	0.561235	0.155358	0.43129	0.534724	0.56954	0.256498	0.389049	0.442471	0.564011	0.60476	0.555796	0	0.440964	1
A0A590UJW8;Q96J02;Q96J02-2	0.111067	0.603749	0.340337	0.134467	0.0496787	0.0495497	0.129125	0	0.236232	0.113384	0.0539033	0.31134	0.27698	1
A0A590UJY5	1	0	0.509579	0.494593	0	0.425128	0	0	0	0	0	0	0	0
A0A590UK09;A0A590UK73;B1AKN5;B1AKN7;B1AKN8;Q12857;Q12857-2;Q12857-4	0.0924088	0.0746992	0.0127508	0.031485	0.0469283	0.0497712	0	0.0531637	0.0733215	0.0801691	0.128116	0.213319	0.0944501	1
A0A590UK87	0	0	0	0	0.879068	1	0	0.463765	0	0	0	0	0	0
A0A590UKC3;Q9UF12	0.111864	0	0.0265185	0.0385629	0.0473681	0.0588197	0.0835693	0.112626	0.16712	0.226773	0.688942	1	0.623229	0.54288
A0A5E8;Q99501;Q99501-2;Q99501-3;Q99501-4	0	0	0.133872	0	0.0659687	0.146361	0.0861316	0.366459	0.307658	0.366256	0.926582	1	0.415163	0.155921
A0A5F9UK94;H0Y360;Q01433;Q01433-2	0.652463	1	0.861785	0.759332	0.511407	0.266641	0.154396	0.168051	0.0862092	0.08867	0.0650016	0	0.0782485	0.0383737
A0A5F9UP49;Q9BRK5	0.0445082	0	0.0388765	0.0745661	0.1469	1	0.973421	0.455944	0.217494	0.229613	0.197794	0.289619	0.140182	0.158929
A0A5F9UY30;A0A5H1ZRP2;O43493;O43493-3;O43493-5;O43493-7	0.183365	0	0.0759875	0.161453	0.264809	0.895728	1	0.691	0.406488	0.423317	0.286084	0.161185	0.0711037	0.149647
A0A5F9YFS9;C9JBL1;Q9Y6A9	0	0	0	0	0.0912922	0.130001	0.161373	0.654979	0.868337	0.702667	0.674572	1	0.801085	0.604797
A0A5F9YLF9	0	0	0	0	0	0	0	0	0	1	0	0	0.321523	0
A0A5F9ZGN6	0	0	0	0	0	0	0	1	0.684735	0.622111	0	0	0	0.427628
A0A5F9ZGW5;C9J8U3;Q7Z2E3-13;Q7Z2E3-5;Q7Z2E3-7;Q7Z2E3-9	0	0.17185	0.0105509	0.173144	0.185581	0.433741	0.545246	0.519513	0.495729	0.517213	0.726831	0.64672	0.490461	1
A0A5F9ZGX0	0	0	0	0	0	0.397428	0.343054	0.313901	0	1	0.474081	0	0	0
A0A5F9ZGX3;A0A5F9ZGY3;A0A5F9ZGY4;A0A5F9ZGZ5;A0A5F9ZH19;A0A5F9ZH30;A0A5F9ZHD2;A0A5F9ZHE4;A0A5F9ZHN5;A0A5F9ZHR8;A0A5F9ZHS1;A0A5F9ZI30;A0A5F9ZI40;A0A5F9ZI65;D6RHE1;I6L894;Q01484	0.215533	0	0.208032	0.185654	0.173772	0.227996	0.157063	0.263366	0.329393	0.427913	0.73286	1	0.75001	0.402878
A0A5F9ZGY7	0.749697	1	0.492248	0.408182	0.457387	0.171701	0.0633309	0	0	0.043166	0.125584	0	0	0.120762
A0A5F9ZH13;E9PR06;Q9NQC8;Q9NQC8-2	0	0	0	1	0	0	0	0	0	0	0	0	0	0
A0A5F9ZH20;A0A5F9ZH60;A0A5F9ZH84;Q5TF39
A0A5F9ZH43;A0A5F9ZHW6;A4UGR9-4;A4UGR9-5;A4UGR9-6;A4UGR9-7	0	0	0	0	0	0	0	1	0.60687	0.86303	0.563947	0	0	0.765478
A0A5F9ZH85	0.119652	0	0	0.418071	0.201941	0.630216	0	0	0	0	0	0	0	1
A0A5F9ZH93;A0A5F9ZHX9;Q9UHN1	0	0	0	0	0.0652201	0	0	0	0.105642	0.249952	0.609001	1	0.580163	0.466311
A0A5F9ZHE0;C9JQD1;P35557	0.451672	1	0.326285	0.325026	0.342848	0.305478	0.134342	0.0847742	0.0933633	0.120759	0.100492	0	0.069444	0
A0A5F9ZHH6;P19793;P19793-2	0.100795	0	0.164491	0.216875	0.257897	0.316434	0.263816	0.299869	0.249931	0.31138	0.286636	0.339245	0.478289	1
A0A5F9ZHJ0	0.0329447	0.0271812	0.0183225	0.0353996	0.0236999	0.0641551	0	0.0848093	0.0686299	0.152722	0.881583	1	0.575357	0.326045
A0A5F9ZHM4;P07195	0.755542	1	0.754349	0.571285	0.498149	0.235778	0.144934	0.134871	0.0475827	0.0443678	0.00358897	0	0.00270002	0.037755
A0A5F9ZHN2;E7EWD6;Q76L83;Q76L83-2	0	0	0.0210113	0.475696	0	0	0	0	0.398855	0	0	0	0	1
A0A5F9ZHN7;Q9NTJ5	0.171456	0	0.065025	0.100996	0.192927	0.483176	0.760941	1	0.732918	0.584012	0.548428	0.589294	0.409999	0.503783
A0A5F9ZHN9;P51648;P51648-2	0.229556	0	0.0970018	0.11347	0.201252	0.527587	0.603526	1	0.975347	0.754333	0.867347	0.891165	0.695637	0.648601
A0A5F9ZHP1;Q8N9N2-2	0.116767	0	0.571146	0.416984	0.496984	0.560265	0.520172	0.610138	0.913796	0.730521	0.880098	0.971103	0.821917	1
A0A5F9ZHQ6;A0A6I8PIF8;A0A6I8PIP2;A0A6I8PU78;O75071;S4R3Q1	0	0	1	0	0	0	0	0	0	0	0	0	0	0
A0A5F9ZHX8;A0A5F9ZHZ5;F5GYY5;F5H324;P51690	0.110207	0	0.0458775	0.0447835	0.165302	0.35137	0.650601	1	0.938876	0.692819	0.606391	0.732758	0.527098	0.497407
A0A5F9ZI21;Q92974;Q92974-2;Q92974-3;V9GYF0;V9GYM8	0	0	0	0.198945	0	0.344891	0.50639	1	0.916728	0.930934	0.344608	0.309294	0	0
A0A5F9ZI33	0	0	0	0	0	0.665581	0.504664	1	0.868862	0.920335	0.289349	0.292824	0	0
A0A5F9ZI63;O75530;O75530-2;O75530-3	0	0	0	0	0	0	0	0	0	0	0	0	0	1
A0A5F9ZI76;Q32ZL2;Q32ZL2-2
A0A5H1ZRP4;Q8WX92;Q8WX92-2	0.486221	0.332313	0.305022	0.35245	0.155431	0.252838	0.222256	0.266815	0.258123	0.252749	0	0.22165	0.344072	1
A0A5H1ZRR2;G9CGD6;G9CGD6-2;G9CGD6-3;Q6P9H4	0	0	0	0	0	0.521017	0	1	0.759487	0.429536	0.431876	0.637739	0	0.680543
A0A5H1ZRS1	0.0695823	0.29209	0.0918687	0.159776	0	0.17103	0.320852	0.403303	0.457397	0.33404	0.448206	1	0.315604	0.614242
A0A5K1VW60;Q99766	0.0119066	0	0.0416632	0.0940753	0.0897494	0.03928	0.0676653	0.122582	0.0623275	0.150277	0.582781	1	0.466889	0.522496
A0A5K1VW66;P35240;P35240-2;P35240-3;P35240-4;P35240-5;P35240-6;P35240-8	0	0	0	0	0	0.0772025	0.171221	0.250673	0.823758	0.586837	0.277715	0.473118	0.0872779	1
A0A5K1VW70;P98198;P98198-3	0	0	0	0	0	0.387677	0	0	0.661994	1	0	0	0	0
A0A5K1VW95;P40925;P40925-3	0.95999	1	0.759775	0.469875	0.478436	0.211413	0.12441	0.136043	0.0467081	0.0538537	0.0267011	0	0.00139361	0.0260762
A0A669KA36;A0A669KB88;B7ZLR4;E7ET55;F5H748;P35670;P35670-2;P35670-4	0.091111	0	0.0309932	0.160867	0.392908	0.941412	0.953749	0.815459	1	0.6814	0.282257	0.406148	0.0980972	0.589087
A0A669KAV7;A0A669KBH9;M0QXA7;O95785-3	0	0	0	0	0	0	0	0.317249	0	0.031587	0	0.0524357	0.515536	1
A0A669KAW1;G3XAD2;Q9BYC5;Q9BYC5-2;Q9BYC5-3	0	0	0	0	0	0.537568	1	0.631215	0	0	0	0	0	0
A0A669KAX3;O76024	0.3338	0	0	0.2196	0.0181547	0.340953	0.514863	0.822244	1	0.819598	0.540011	0.546133	0.252143	0.302729
A0A669KAX4;K4DI93;Q13620;Q13620-1;Q13620-3	0.550924	0.808225	1	0.933112	0.547324	0.497824	0.362297	0.239211	0.21659	0.175524	0	0.0172938	0.11864	0.252155
A0A669KAX9;Q5T653	0	0	0.0117732	0.032366	0.0139342	0.0622428	0.0997962	0.0976746	0.149674	0.19708	0.732403	1	0.525344	0.31871
A0A669KAY5;A0A669KB27;A0A669KBH7;C9JTE9;Q9UHQ4;Q9UHQ4-2	0.161544	0	0.385302	0.656026	0.535153	0.603086	0.808058	1	0.857066	0.57499	0.371157	0.41543	0.308582	0.302022
A0A669KB10;A0A669KBG8;Q92538;Q92538-2;Q92538-3	0.201649	0.35866	0.322819	0.478295	0.410189	0.996892	1	0.365984	0.0777532	0.128969	0.00846098	0.0243089	0	0.0923253
A0A669KB12;Q09472	0.166126	0.123687	0.178896	0.198648	0.127729	0.128943	0.11869	0.0489782	0.104242	0.113705	0.061719	0	0.17419	1
A0A669KB29;K7EQ21;K7EQZ1;Q9P0U4;Q9P0U4-2	0	0	0	0	0	0	0	0	0	0	0	0	0	1
A0A669KB41;A0A669KBH5;D6RA31;E7EPV7;P37840;P37840-2;Q16143	0.192987	0.173516	0	0	0.084691	0	0	0	0.0361966	0	0.283546	1	0	0.111728
A0A669KB53;A0A669KB56;A0A669KB68;A0A669KBA4;A0A669KBI6;J3KPM9;P42224;P42224-2	0.623221	1	0.817075	0.628985	0.45078	0.271059	0.198181	0.121013	0.0928461	0.0656245	0.0157265	0	0.0855762	0.0524078
A0A669KB62;O60716-20;O60716-22;O60716-23;O60716-24	0	0	0	0	0	0	0	0	1	0	0	0	0	0
A0A669KB69;Q6Q788	0.282071	0	0	0.210387	0.109206	1	0.922807	0.543436	0.445242	0.378809	0.416988	0.390638	0.250495	0.367147
A0A669KB71;O94842;O94842-2;O94842-3	0	0	0	0	0.458772	0	0	0	0.376095	0.0657104	0.213418	0.186699	0.221254	1
A0A669KB81	0	0	0	0	0	1	0	0	0.306943	0	0.404861	0	0.136204	0
A0A669KBD5;A0A669KBI7;Q9UMN6	0	0	0	0	0	0	0	0	0	0	0	0	0	1
A0A669KBE6;A0A669KBF5;Q9NV96;Q9NV96-2;Q9NV96-3	0.266026	0	0.127994	0.21134	0.498353	0.47584	1	0.694208	0.637158	0.569667	0.52348	0.678793	0.532759	0.426735
A0A669KBF4;O00327;O00327-1;O00327-6;O00327-7;O00327-8;O00327-9	0	0	0	0	0	0	0	0.0177406	0	0.0316205	0	0	0	1
A0A669KBG1
A0A669KBH1
A0A669KBH4;Q14999;Q14999-2	0.163059	0	1	0.742532	0.541318	0.433547	0.304067	0.237794	0.171814	0.166188	0.0757367	0	0	0
A0A669KBJ1;Q9P202;Q9P202-3;Q9P202-4	0	0	0.122441	0	0	0	0	0	0	1	0	0	0	0
A0A669KBJ4;E7ERL6;Q6P0Q8;Q6P0Q8-2	0	0	0.907065	0	0	0	1	0	0	0	0.330262	0	0.965935	0
A0A669KBJ7;Q9H2P0	0.251597	0	0.130856	0.110112	0.0866347	0.125559	0.147551	0.102089	0.237544	0.132748	0.170096	0.27217	0.364684	1
A0A669KBL1;Q93009;Q93009-3	0.630014	0.862116	1	0.749075	0.570768	0.358694	0.219883	0.197459	0.186807	0.0577642	0	0.0899401	0.215325	0.391893
A0A6E1WB48;Q14541;Q14541-2	0	1	0	0	0	0	0	0	0.410374	0	0.335646	0	0.576025	0.28345
A0A6I8PIT3;A0A6I8PIV1;Q9P2J5	0.0971508	0.143599	1	0.817691	0.596144	0.375925	0.125428	0.132904	0.0604667	0.0495124	0.035141	0	0.00141069	0.016404
A0A6I8PR89	0	0	0	0	0	0	1	0	0	0	0	0	0	0
A0A6I8PRM6;B1ALU3;O95490-2;O95490-5	0.24343	0	0	0	0.0462746	0.0969901	0.446888	0.882072	0.949915	0.905574	0.797423	0.835104	0.556826	1
A0A6I8PS32;Q99615	0.592727	1	0.633191	0.56625	0.388708	0.358764	0.187174	0.186612	0.11768	0.110064	0.0673013	0.000585328	0.0774607	0
A0A6I8PTZ8;Q9UL18	0.0093949	0	0.0638366	0.132443	0.15637	0.254578	0.367692	0.491925	0.865163	0.713077	0.842199	1	0.934235	0.681025
A0A6I8PU65;Q9NUD9	0	0	0	0	0	0	0	1	0.181007	0.180875	0	0	0	0
A0A6Q8JGF9;I3L1H5;I3L3X9;Q9BZG8;Q9BZG8-2;Q9BZG8-3	0.854441	1	0.803597	0.626395	0.561578	0.386973	0.375862	0.240377	0.222307	0.136082	0	0	0	0
A0A6Q8JH89;A0A6Q8LYX2;Q86WD7;Q86WD7-2;Q86WD7-4;Q86WD7-5;Q86WD7-6;Q86WD7-7	0	0	0	0	0	0	0	0	1	0	0	0	0	0
A0A6Q8JR05;Q6V0I7;Q6V0I7-3	0.936294	0	1	0.149594	0.644275	0.411503	0	0	0	0	0	0	0	0
A0A6Q8KRG2;Q08379	0.184552	0.972166	0.0927864	0.309778	0.175622	1	0.790582	0.247545	0.0729606	0.117931	0.0685974	0.0818483	0	0.090904
A0A6Q8PEX6;A0A6Q8PFB7;A0A6Q8PG86;A0A6Q8PHF4;O95163	0.384042	0.508284	1	0.862618	0.607857	0.373715	0.161233	0.179382	0.0973354	0.0633308	0.0693916	0	0.0782957	0.0718079
A0A6Q8PEY3;A0A6Q8PGV6;I3L3G9;I3L522;Q9NXR1;Q9NXR1-1	0.685881	1	0	0.222621	0.495519	0	0.483821	0.545932	0.82247	0	0	0	0	0
A0A6Q8PEZ4;A0A6Q8PFG4;A0A6Q8PGL3;A0A6Q8PGS2;A0A6Q8PGU0;A0A6Q8PH79;B4DIH2;Q8TB36;Q8TB36-2	0	0	0	0	0	0	0	0	0.146152	0.141644	0.517169	1	0.229802	0
A0A6Q8PEZ7;A0A6Q8PG30;A0A6Q8PHQ1;Q96S66	0.061199	0	0.0252972	0.0998206	0.13921	0.4047	0.831859	1	0.999507	0.746576	0.662205	0.69181	0.56339	0.671715
A0A6Q8PF03	0.816123	0	1	0	0.981573	0.132836	0.281777	0	0	0	0	0	0	0
A0A6Q8PF05;B4DHE8;J3KTC1;Q96DH6;Q96DH6-2	0	0.12878	0.172825	0.254996	0.347521	0.572184	0.82066	0.711997	0.777661	0.628062	0.634523	1	0.940429	0.861953
A0A6Q8PF10;A0A6Q8PF85;A0A6Q8PFT0;A0A6Q8PFW0;A0A6Q8PFY8;A0A6Q8PG57;A0A6Q8PHF1;B0QYZ8;B0QYZ9;O95461;O95461-2;V9GY39;V9GY56;V9GYK8;X5DRG1
A0A6Q8PF14	0	0	0.717824	0	0	1	0	0	0	0	0	0	0	0
A0A6Q8PF33;A0A6Q8PGE8;A0A6Q8PGN5;H3BPK7;P49588	0.935888	1	0.811769	0.667807	0.50011	0.290582	0.166782	0.15688	0.0497492	0.0510532	0.0262235	0	0.00340526	0.0420193
A0A6Q8PF40;A0A6Q8PFC4;A0A6Q8PFY7;A0A6Q8PG00;A0A6Q8PG04;A0A6Q8PGS4;A0A6Q8PH27;A0A6Q8PH89;Q92734;Q92734-2;Q92734-3;Q92734-4	0.603466	1	0.433702	0.355105	0.345193	0.207943	0.19424	0.124756	0.0859641	0.0577039	0.0313933	0	0.0153076	0.0268125
A0A6Q8PF44;A0A6Q8PH71;A0A6Q8PHA2;A0A6Q8PHG2;Q27J81;Q27J81-2	0.498055	1	0.562946	0.480295	0.446617	0.376916	0.333942	0.413098	0.332868	0.316704	0.146415	0.221683	0.242369	0
A0A6Q8PF62;A0A6Q8PF70;A0A6Q8PF86;A0A6Q8PFJ3;A0A6Q8PG59;A0A6Q8PGB4;A0A6Q8PGP4;A0A6Q8PGY4;A0A6Q8PGY7;A0A6Q8PHA1;A0A6Q8PHC7;A0A6Q8PHH5;A0A6Q8PHK3;A0A6Q8PHP5;Q92562	0.360921	0	0.676921	0.90823	1	0.839054	0.56944	0.260072	0.342383	0.353815	0.213821	0.0286281	0.288445	0.173366
A0A6Q8PF94;O15344	0	0	0.448592	0.432841	0.38193	0.648688	0.673877	0.552783	0.653489	0.565049	0.775549	0.705634	0.917282	1
A0A6Q8PFA4;A0A6Q8PFD4;A0A6Q8PFI6;A0A6Q8PFL5;A0A6Q8PFT9;A0A6Q8PFW1;A0A6Q8PG02;A0A6Q8PG22;A0A6Q8PGB2;A0A6Q8PGF7;A0A6Q8PGH6;A0A6Q8PGT8;A0A6Q8PGW1;A0A6Q8PGY0;A0A6Q8PH15;A0A6Q8PH70;A0A6Q8PH85;Q6UWE0;Q6UWE0-2	0.734142	1	0.615169	0.647131	0.498235	0.287455	0.20772	0.169908	0.096451	0.108844	0.0404595	0	0	0
A0A6Q8PFA6;A0A6Q8PG37;A0A6Q8PGH7;A0A6Q8PH57;O00139;O00139-1;O00139-2;O00139-4;O00139-5	0.326254	0	0.333736	0.363152	0.248768	0.349403	0.375503	0.381646	0.439856	0.439833	0.433908	0.5302	0.412565	1
A0A6Q8PFE6;Q9UKA9;Q9UKA9-2;Q9UKA9-3;Q9UKA9-4	0	0	0.0781926	0	0.0541131	0.207725	0.245306	0.298226	0.514337	0.435804	0.403063	0.609702	0.4463	1
A0A6Q8PFG0;A0A6Q8PGT4;A0A6Q8PH04;A0A6Q8PHN3;A0A6Q8PHP9;Q9P212;Q9P212-2	1	0	0.0323803	0	0	0.677236	0.453841	0	0	0	0	0	0	0
A0A6Q8PFI8;P11166	0	0	0.199344	0.343823	0.44081	1	0.675414	0.635965	0.584007	0.491035	0.327579	0.300486	0.107847	0.470325
A0A6Q8PFJ0;P02545	0.0304744	0.0107527	0	0.00897095	0.0148817	0.0225498	0.0558166	0.066571	0.130942	0.121527	0.215549	0.281988	0.2005	1
A0A6Q8PFJ4;A0A6Q8PGV8;O95140	0	0	0.0291524	0.184602	0.240777	0.11771	0.117072	0.154558	0.236009	0.306557	0.917909	1	0.572749	0.413466
A0A6Q8PFK4;P50747	0.718266	1	0.779622	0.308009	0.299618	0.113452	0.12898	0.0553974	0.0650836	0.0306874	0	0.100717	0.0807477	0.12791
A0A6Q8PFM5;O95831;O95831-3	0.025208	0.00182831	0	0.00635217	0.00500627	0.0239792	0.0410369	0.0960811	0.185496	0.225972	0.703331	1	0.552996	0.487496
A0A6Q8PFM9;A0A6Q8PFQ9;A0A6Q8PG83;A0A6Q8PGL8;A0A6Q8PGP3;A0A6Q8PGR8;A0A6Q8PH28;Q96JN0;Q96JN0-2;Q96JN0-3	0	0	0	0	0	0	0	0	0	1	0	0	0	0
A0A6Q8PFU3;P43034	0.618133	1	0.768126	0.626886	0.554901	0.202658	0.506648	0.0799342	0.0414627	0.0118698	0.0147229	0	0.01117	0.0788706
A0A6Q8PG52;A0A6Q8PH84;P51149	1	0.106795	0	0.0500693	0.0707696	0.488144	0.504437	0.804549	0.558941	0.436123	0.283312	0.334575	0.33749	0.101422
A0A6Q8PG54;G3XAG5;P51793;P51793-2	0	0	0	0	0	1	0.641995	0	0.360532	0.171566	0	0	0	0.171849
A0A6Q8PG85;Q9HD42	0.68034	1	0.21696	0.278746	0.289106	0.270221	0.213527	0.207564	0.145919	0.114521	0.0262862	0.030827	0	0.0432959
A0A6Q8PGA8;A0A6Q8PGI6;A0A6Q8PGZ8;A0A6Q8PHH9;P41250	0.616558	1	0.751898	0.624053	0.436285	0.227989	0.0635124	0.0991072	0	0.039625	0.0822228	0.140003	0.0566964	0.0434801
A0A6Q8PGB0;P24928	0	0.0760316	0.264172	0.205575	0.0772318	0.0527453	0.0720478	0.0667137	0.0494754	0.109595	0.112953	0.199326	0.0576027	1
A0A6Q8PGM6;Q9UJY1	0.519737	0.326342	0.00897855	0.367235	0.304793	0.382846	0.668125	0	0.245895	0.428875	0.437635	1	0.46682	0.437992
A0A6Q8PGS5;A0A6Q8PHS7;C9JEX3;Q13614;Q13614-2	0.662388	1	0.780711	0.216637	0.370127	0.397113	0.290886	0.598099	0.817767	0.590337	0.294876	0	0.410684	0.913379
A0A6Q8PGU6;Q8NB90	0.637984	0.533375	0.624322	1	0.916493	0.696723	0.459824	0.283725	0.307864	0.320672	0.786659	0	0.525608	0.528376
A0A6Q8PH13;A0A6Q8PH87;Q86WG5;Q86WG5-3	0	0	0	0.457509	0	0	0.103281	0	0.730315	0.372483	0.295818	0	0	1
A0A6Q8PH21;Q9UHW9;Q9UHW9-2;Q9UHW9-3;Q9UHW9-4;Q9UHW9-5;Q9UHW9-6	0	0	0	0	0	0	0	0	0	0	0	1	0	0
A0A6Q8PH68;Q9UGU0;Q9UGU0-2
A0A6Q8PH82	0	0	0	0	0	0	0	0	1	0	0	0	0	0
A0A6Q8PHA5;E7ETE2;P12081;P12081-4	0.738676	1	0.689299	0.550724	0.473668	0.254352	0.192149	0.183711	0.0770749	0.0673723	0.0461009	0.0838718	0	0.0251994
A0A6Q8PHC6;P50440	0.0591836	0.0455286	0.0547505	0.0212009	0.0209429	0.00192499	0	0.00134005	0.0385456	0.0785346	0.46431	1	0.733639	0.529546
A0A6Q8PHH2;O95251;O95251-2;O95251-4	0	0	0	0	0	0	0	0	0	0	0	0	0	1
A0A6Q8PHK0;Q14669-2	0.17864	0.347482	0.0435916	0.0791759	0.0651857	0.084184	0	0.0887375	0.126811	0.219994	0.125844	0.222001	0.21798	1
A0A6Q8PHM5	0	0	0	0	0	0	0	0	0	0	0.621751	0	1	0
A0A6Q8PHP0;P49902;P49902-2	0.61984	0.756401	1	0.743361	0.556804	0.408353	0.413216	0.28246	0.111692	0.0573865	0	0.206136	0.139853	0.0693662
A0AV96-2	0.254226	0	0.399382	0.284944	0.200363	0.291882	0.409091	0.374018	0.376722	0.400975	0.569886	0.819813	0.582611	1
A0AVL1;F8WC54;Q13443;Q13443-2	0	0	0	0	0	0.410102	1	0.471385	0.197703	0.176355	0.599741	0.672159	0.199875	0.894179
A0AVT1	0.778915	1	0.81005	0.608601	0.420731	0.256156	0.171808	0.130651	0.0492617	0.0442433	0.0107235	0.00860829	0	0.050717
A0JLT2;A0JLT2-2;J3KR33	0	0	0	0	0	0	0	0	0	0	0	0	0	1
A0MZ66	0.654225	1	0.412288	0.364632	0.291091	0.225036	0.126379	0.102041	0.0705453	0.0495434	0.00687158	0	0.014638	0.0135097
A0PJW6	0	0	0	0	0	0	0	0.0646685	0.173227	0.109732	0.755867	1	0.492307	0.579472
A0PJX8	0.389679	0	0	0.120473	0.392919	0.736292	0.533851	0.988159	1	0.534347	0.379558	0.408157	0.239253	0.629245
A0PJZ3;C9JND4	0	0	0	0	0	0	0	1	0	0	0	0	0	0
A0RZB6	0.581889	1	0.725866	0.314708	0.195498	0.0614706	0.247773	0.148381	0.170031	0	0	0	0	0.0219449
A1A4S6;H0Y8W5	0	0	0	0	0	0	0	0.165317	0.244434	0	0	0	0	1
A1A519;A1A519-2;A1A519-3;D6RIE9
A1A5C7;A1A5C7-2;A1A5C7-3;C9J4Z0	0	0	0	0	0	0	0	0	0	1	0	0	0	0
A1IGU5	0.281701	0.265774	0.707758	0.301583	0.768411	0.654064	1	0.667072	0.732027	0.755023	0	0.296141	0.560899	0.60691
A1KZ92;A1KZ92-2;A1KZ92-3;H0YAV0;K4DIA6	0	0	0	0	0	0	0.0310688	0	0	0	0	0	0	1
A1L0T0	0.111507	0	0.186271	0.146335	0.209246	0.421042	0.785651	1	0.771195	0.643551	0.711983	0.575787	0.339875	0.403517
A1L188	0	0	0	0	0	0	0	0	0	0.0428906	0.210018	1	0	0
A1L390;A1L390-3	0.814542	1	0.201652	0.148087	0.21964	0.0715874	0.247757	0	0.0489242	0.0131359	0.0984328	0.327864	0.0448848	0.0231667
A1L3X0;D6RBM2;D6RHD0
A1X283	1	0.260789	0.410039	0.434586	0.24875	0.106085	0.467242	0.0706048	0.0839082	0.0454958	0	0	0.0833557	0.134468
A2A274;Q99798	0.0551156	0.0385671	0.0124699	0.00234734	0.00368064	0	0.00702606	0.0200477	0.0403688	0.138651	0.645212	1	0.667694	0.407237
A2A2L4;Q5JX74;Q9NUS5	0	0	0	0	0	0	1	0.305768	0	0	0	0	0	0
A2A2N0;O60676	0	0	0	0	0	0	0	0	0.0226052	0.073755	0	0	1	0
A2A2Q9;Q9Y312	0.709251	1	0.783053	0.72306	0.480379	0.353155	0.369596	0.232153	0.132815	0.136703	0.116116	0	0.108606	0.154662
A2A2V1;P04156	0	0	0	0	0	0	0	0	1	0.616303	0	0	0	0
A2A2V2;P42696;P42696-2;Q5TCT4	0	0	0	0	0	0	0	0	0	0	0	0	0	1
A2A369;Q8NF50;Q8NF50-2;Q8NF50-3;Q8NF50-4	0	0	0.178935	0.0661703	0.239657	0.346243	0.38391	0.577714	0.792225	0.727543	0.643429	0.716295	0.675898	1
A2A3G7	0	0	0	0	0.583205	1	0.580395	0	0.372946	0.304659	0.112082	0	0.210587	0
A2AJT9;A2AJT9-2;A2AJT9-3;F2Z385;H7BXX2
A2IDC6;Q13084	0	0	0	0	0	0.0314823	0.0212246	0.0806142	0.138662	0.164708	0.557923	1	0.580325	0.363504
A2RRP1	0.266078	0	0.0869667	0.124662	0.157003	0.601887	0.774903	0.900494	1	0.752802	0.438291	0.515467	0.454167	0.474981
A2RTX5;B7ZLP8	0.245625	0	1	0.74708	0.67339	0.560915	0.394609	0.511216	0.276343	0.307124	0.0781919	0.0424352	0.239135	0.322274
A2RU37	0	0	0	0.266626	0.0215478	1	0.693885	0.270451	0.19309	0.168257	0.0916743	0.024693	0.0538466	0.253246
A2RU49	1	0.736158	0.494253	0.400817	0.477285	0.332368	0.278875	0.151772	0.166024	0	0.108848	0	0	0.146712
A2RUC4	0.790131	0.308676	1	0.727775	0.52201	0	0.351824	0.159619	0.0774008	0	0	0	0	0
A2RUS2;A2RUS2-2;A2RUS2-4;E5RHH2;E5RI43;E5RIR7;E5RJ42;E9PF32;H0YAY3	0.0100979	0	0.0300365	0.0177678	0.0227835	0.0107876	0.0171342	0.0032752	0.0270201	0.0805781	0.488306	1	0.656491	0.20675
A2VDF0	1	0.814375	0.244646	0.16453	0.327359	0.242827	0.0807707	0.0699351	0.30679	0.00332645	0	0	0	0
A2VDJ0;A2VDJ0-3;A2VDJ0-5	0.674021	1	0.0541496	0.499602	0	0.411815	0	0	0.0921883	0.0896867	0.000908425	0	0	0.760329
A3KFL2;Q13868;Q13868-2;Q13868-3	0	0	0.156512	0.623372	0.705227	0.186926	0	0.507908	0	0	0	0	0	1
A3KMH1;A3KMH1-3	0.0106746	0.0505258	0.0129226	0.00658876	0	0.00406515	0.00976371	0.0258009	0.0822076	0.156991	0.634749	1	0.62038	0.420039
A3KN83;A3KN83-2;A3KN83-3	0.895023	0.927971	1	0.614667	0.587093	0.239934	0.0182222	0.495064	0.446555	0.0881749	0	0	0.384961	0.41555
A4D1E9	0	0	0	0	0	0	0.0267108	0.0882168	0.0827759	0.0457918	0.568341	1	0.636441	0.456853
A4D1P6	0.724458	0.590453	1	0.879899	0.828993	0.630472	0.536634	0.433735	0.474604	0.455867	0.482128	0	0.341696	0.325543
A4D1U4;C9J7X6	0	0	0.183625	0.4067	0.372794	0.428073	1	0.421106	0.311041	0.360238	0.217387	0	0	0.0674584
A4D2B0	0.617267	1	0.302555	0.0674795	0.0798343	0.0497479	0.20965	0.0407411	0	0	0	0	0	0
A5D8V6;F5H4Q5	0.220025	0	0.219595	0	1	0.659903	0.661322	0.155986	0.60292	0	0	0	0	0
A5D8V7;A5D8V7-2;K7EN59;K7EPK8	0	0	0	0	0	0.0607977	0	0	0.21665	0.455138	1	0.975466	0.820521	0.183479
A5PLN9;A5PLN9-2;A5PLN9-4;A5PLN9-5	0.749107	0.484211	0.661773	0.824932	0.855461	1	0.558689	0.480732	0.329866	0.315801	0.250522	0	0.185833	0.126059
A5YKK6;A5YKK6-2	0	0.0059187	0.407591	0.424525	0.485997	0.333424	0.375247	0.543245	0.805994	0.80802	0.656565	0.812766	1	0.295913
A6H8Y7;Q6ZRK6;Q6ZRK6-2
A6NC78	0.00639962	0	0	0.00311834	0	0.0348614	0.0448529	0.097604	0.188143	0.219222	0.628683	1	0.497795	0.456326
A6NC98;A6NC98-4;A6NC98-6
A6NCC9;C9JHT9;C9JJV1;E9PME3;Q9Y5U2;Q9Y5U2-2	0.738739	1	0.585604	0.488422	0.337386	0.242425	0.186943	0.144095	0.0781008	0.0683088	0	0	0	0.0958587
A6NCE7;H3BTL1;Q9GZQ8	0.343753	0	0.0771338	0.199225	0.16967	0.604047	0.778678	0.72647	1	0.484917	0	0	0.130985	0
A6NCS6	0.145673	0	0.0184774	0.0682545	0.0853593	0.183423	0.207216	0.558648	0.916205	1	0.861957	0.674916	0.386327	0.777869
A6ND36	0.39417	1	0.746759	0.454382	0.555981	0.138841	0.478972	0.552031	0.157817	0.218984	0	0	0.272796	0
A6ND91	0.897935	1	0.49733	0.384604	0.287961	0.131944	0.130042	0.0456925	0.0316363	0.0332993	0.0208045	0	0.0234137	0.0162502
A6NDG6	0.677809	1	0.422502	0.335769	0.377713	0.176576	0.131054	0.0805535	0.0291155	0.0251257	0.0105444	0.00687294	0.069986	0
A6NDL8	0	0	1	0	0	0	0	0	0	0	0.68695	0	0.458887	0
A6NDR6	0	0	0.545187	1	0	0.556135	0	0	0	0	0	0	0	0.704647
A6NDU8	0	0	0	0	0	0	1	0	0	0	0	0	0	0
A6NE01;F5GYN0;F5H8C1	0	0	0	1	0.724027	0	0	0	0	0	0	0	0	0
A6NED2;G3V2I3	0.500377	1	0	0.501071	0.298239	0	0	0	0	0	0	0	0	0
A6NEE1
A6NEL0;A6NL93;P05114	0.12555	0.306162	0.00445458	0.0251175	0.0240545	0	0.0584352	0.00889591	0.0589844	0.156589	0.128693	0.144592	0.207856	1
A6NEL2	0	0.0233968	0	0.0949061	0	0.11459	0.211156	0.423317	0.425429	0.495276	0.584013	0.402513	0.653303	1
A6NEM2;P51610;P51610-2;P51610-4	0.263799	0.456479	0.0434309	0.035349	0.0680729	0.0789108	0.0102842	0	0.0247938	0.0237227	0.103647	0.264031	0.188421	1
A6NEY8	0.40076	1	0.26553	0.188045	0.212704	0.155723	0.24939	0.0610336	0.0624678	0.0466625	0.00739515	0	0.0118761	0.0262073
A6NF36	0	0	0	0	0	0	0.027482	0	0	0.160405	0.509089	0.94917	1	0.864453
A6NFQ9;F8W8I8	0	0	0	0	0.778201	0	0	0	0.260928	0	0	1	0	0
A6NFS0;Q9NSD4;Q9NSD4-2	0	0	0	0	0	0	0	0.431	0.745898	1	0	0	0	0
A6NFV8;D6RCT8	0	0	0	0	0	0	0	0	0	0	0	0	0	1
A6NFX8;Q9UKK9	0.691945	1	0.42536	0.273388	0.288308	0.173976	0.221858	0.0771379	0.0467767	0.0346208	0.00780355	0	0.00751224	0.0255397
A6NFY7	0.044913	0.0583437	0	0.0156266	0.00585152	0.013223	0.0178886	0.0297736	0.0531072	0.112367	0.522656	1	0.818187	0.718762
A6NG10;K7EIJ0;K7EMC9;K7ENL2;Q969T9	0.635203	1	0.288321	0.306802	0.283954	0.182822	0.109449	0.0962876	0.148413	0.141049	0.0923345	0.0565995	0	0.0563164
A6NGA6;Q5H9D4;Q9Y5S8;Q9Y5S8-2;Q9Y5S8-3	0	0	0	0	0.231574	0.84213	0.0571438	0	0	0	0	1	0	0.468107
A6NGJ0;P51808	0	0	0	0.536568	1	0.761221	0	0.190474	0	0	0	0	0	0
A6NGL4;P0CW00	0.686128	0	0	0.657758	0.758015	0.19264	0	0	1	0	0	0	0	0
A6NGN6;B1AJZ5;Q9NR34
A6NGQ3;Q5VST9;Q5VST9-2;Q5VST9-6	0.141919	0.126987	0.0321609	0	0.0582162	0.185445	0.343807	0.507688	0.626407	0.650479	1	0.962811	0.642714	0.713213
A6NGU5;B5MCK8;P19440	0.0905645	0	0.0402057	0.0523266	0.0994555	0.249647	0.245494	0.531586	0.848699	0.627773	0.570417	0.719786	0.400689	1
A6NGW1;O95070	0	0	0.10413	0.515431	0.511255	0.873447	0.859418	1	0.589337	0.60155	0.510989	0.278947	0	0
A6NGY7;Q9H694-2	0	0	0	0	0	0.176754	0	0	1	0.130409	0	0	0	0
A6NH11	0.0414442	0	0.113436	0.286124	0.257593	1	0.73873	0.433396	0.27363	0.212009	0.183226	0.188575	0.0788018	0.27906
A6NHB5;A6NHN7;A6NL54;Q14202;Q14202-2;Q14202-3	0.984811	0	1	0	0	0	0	0	0.0272168	0	0	0	0	0
A6NHG8;Q13114	0	0	0	0.0759072	0.162562	0.507869	0.897991	0.879296	0.933968	1	0.272182	0	0.621811	0.47355
A6NHJ8;A6NND8;C9JAL0;C9K0F7;H7C3I5;O95825;O95825-2	0	1	0.29649	0.384178	0.549793	0.550357	0.0262293	0.388188	0.121489	0.194225	0.541459	0	0	0
A6NHR9;A6NHR9-2	0	0	0	0	0	0	0.0091995	0.0776042	0.0358433	0	0.05935	0	0.148775	1
A6NI28;E9PJK4	0	0	0	0.119975	0	0.287754	0.144045	0.900204	0.987551	1	0.882339	0.52183	0.299844	0.863622
A6NI72;A8MVU1;C9J155;P14598;P14598-2	0	0	0.115475	0.522289	0.862026	0.190088	1	0.506434	0.535432	0.0712371	0	0	0	0
A6NIH7	1	0.938932	0.856148	0.626779	0.727451	0.360972	0.671312	0.516123	0.130113	0.378027	0.164502	0	0	0.0133981
A6NIT2;A6NMN0;P46020;P46020-2;P46020-3	0	0.36867	0.914855	1	0.71302	0.434619	0.13012	0.160558	0.078684	0.0331486	0.0497286	0	0.0664185	0
A6NIV6	0.0177443	0	0.00392939	0.0141774	0.0891618	0.356901	1	0.0116816	0.0184925	0.00659711	0	0	0	0
A6NIZ0;Q9GZM8;Q9GZM8-2;Q9GZM8-3	0.424629	1	0.622185	0.33338	0.34387	0.229078	0.299908	0.279601	0.160387	0.332407	0.203491	0	0.175516	0.293814
A6NJA2;P54578;P54578-2;P54578-3	0.409651	0.67866	1	0.858566	0.647619	0.344756	0.161329	0.180211	0.0701327	0.0561559	0	0.0186138	0.00866245	0.00136883
A6NK44;H7C348	0	0	0	0	0	0.512039	0.594226	0.055929	0.134348	0.209084	0.368706	0.581521	1	0
A6NKB5-2
A6NKD9	0	0.193154	0	0	0.162964	0.227397	0.215543	0.338749	0.783123	0.700025	1	0.63406	0.628757	0.510837
A6NKN8	0.584867	1	0.15896	0.153776	0.15685	0.0891523	0.0242652	0.0125549	0	0	0	0	0	0
A6NKZ2;P51606	0	0.887736	1	0.546453	0	0	0	0	0	0	0	0	0	0
A6NLH6;Q9P003	0.12	0	0.153909	0.244817	0.315024	0.650967	1	0.716137	0.566473	0.538035	0.556377	0.499964	0.397938	0.538274
A6NLN1;P26599;P26599-2;P26599-3	0.0124119	0	0.0218848	0.0596004	0.066718	0.183364	0.217214	0.338226	0.582837	0.475921	0.375449	0.677416	0.584193	1
A6NLP5	0.487822	1	0.255976	0.311926	0.259314	0.180893	0.190491	0.104166	0.0848129	0.0749957	0.0521435	0	0.0131094	0.0320505
A6NMH6;Q92599;Q92599-2;Q92599-4	0.017735	0.116956	0.0295195	0.016727	0	0.129571	0.205458	0.285103	0.344004	0.46242	0.454284	0.854083	1	0.404999
A6NMH8;E9PIF1;E9PJK1;E9PRJ8;H0YDJ9;H0YDL9;P60033	0	0	0	0	0	0	0	0	1	0.594313	0	0	0.572781	0
A6NML8;C9J6U3;O60879-2	0.707086	1	0.889196	0.64459	0.686258	0.462352	0.283566	0.226177	0.236989	0.190954	0.0855927	0	0.145878	0.0992505
A6NMQ3;O43768;O43768-2;O43768-3;O43768-4;O43768-9;Q5T5H1	0.888983	1	0.263378	0.18951	0.209213	0.207753	0.163131	0.0494886	0.0281439	0.0246738	0.00544523	0	0.00340736	0.00660749
A6NMV7	0.858358	0	0	0	0	0.662202	0	1	0.138827	0.119796	0	0.0232454	0.0650426	0.0802923
A6NMZ5	0	0	0	0	0	0.0685975	0.247778	0	0.241939	1	0	0	0	0
A6NMZ7;A6NMZ7-2
A6NN50;O75147;O75147-1;O75147-2;O75147-4	0.503063	0	1	0.511291	0.366999	0	0	0.0645725	0	0.159776	0	0	0	0
A6NN73
A6NNK5;Q12888;Q12888-2;Q12888-3	0	0	0	0	0	0	0	0	0	0	0	0.204945	0.11052	1
A6NP16;E7ERM3;Q4VCS5;Q4VCS5-2	0	0	0	0	0	0	0.789659	0.180552	0.501299	0.529283	0.364082	0	0.520449	1
A6NP52;O60831	0.0516105	0	0.138938	0.196982	0.235505	0.636847	0.635072	1	0.863286	0.794219	0.538397	0.653888	0.445628	0.551027
A6PVD3;P48436;P56693;P56693-2;P57073
A6PVK5	0	0	0	0.604145	1	0.767498	0	0.643717	0.295295	0.401003	0	0	0	0
A6PVP4;B7ZBQ1;B7ZBQ3;Q9H944;Q9H944-2	0	0	0	0	0	0	0	0	0	0	0	0	0	1
A6PVU8;Q6UWW7;Q9NNX1;Q9NNX1-2;Q9NNX1-3
A6PVY1;A6PVY2;A6PVY3;A6PVY3-2	0	1	0	0	0	0	0	0	0	0	0	0	0	0
A6PW57;Q99755;Q99755-3;Q99755-4	0	0	0	0	0	0	0	0.322991	1	0.111363	0	0	0	0
A6PWM2;Q6UXH1;Q6UXH1-2;Q6UXH1-3;Q6UXH1-4;Q6UXH1-5;Q6UXH1-6	0	0	0.00578391	0.0192496	0.0318091	0.226544	0.654854	1	0.807534	0.513845	0.411453	0.506981	0.595276	0.0701711
A6QRJ0;P49184
A6XND0;A6XND1;B3KWK7;C9JMX4;H0Y5K2;P17936;P17936-2	0	0	0	0.0373752	0	0.472049	0.77415	0.753801	1	0.961507	0.260893	0.430389	0.0994564	0.936316
A7E2V4;A7E2V4-3;A7E2V4-4;A7E2V4-5;S4R393;S4R410	0	0	0.987647	0.852601	1	0.535303	0.753016	0.582954	0.51681	0.138312	0	0.384114	0	0.0701312
A7KAX9;A7KAX9-2	1	0.916148	0.134837	0.186854	0.215426	0.106023	0.192135	0.0402076	0.155417	0.169251	0	0	0	0
A7MCY6
A7XZE4;Q3SX28	0	1	0	0	0	0	0	0.0394523	0.0520716	0.200846	0	0	0	0
A8CG34;A8CG34-2	0	0	0	0	0	0	0	0	0	0.0824862	0.0091735	0.0206144	0.0194672	1
A8DPD7;Q9C0D3	0	0	0	1	0.884386	0	0	0	0.285546	0	0	0	0	0
A8K7Q2
A8K979;A8K979-2
A8MPP7;A8MPY5;E7ETV6;Q9UPE1;Q9UPE1-2;Q9UPE1-3;Q9UPE1-4
A8MQ02	0.091843	0.19982	0	0	0.0592073	0.154205	0.215371	0.26965	0.683654	0.65965	0.601006	0.792055	0.865471	1
A8MQB8;G3V0J0;Q06787-2	0	0	0	0	0	0.0435858	0	0.444119	1	0.926762	0.156507	0	0.267178	0
A8MSI8;D6RAR2;D6RFL2;J3KTA2	0	0	0	0	0	0	0	0	0	0.449563	0	0	1	0
A8MSY1;C9JYJ2;Q8IVN3	0.500252	1	0	0	0	0	0	0.00755488	0	0	0	0	0	0
A8MTF7;Q96EV2;Q96EV2-2
A8MTT3	0	0	0	0	0	0	0	0	0.42491	0	0.775845	1	0.87648	0.728839
A8MU21;Q9BVK8;Q9BVK8-2	0	0	0	0	0	0	0	0	0.159111	0.34237	1	0	0	0
A8MUM1;Q53HC9	1	0.856859	0.696701	0.851178	0.841391	0.570975	0.418402	0.380224	0.281542	0.152042	0.0418362	0.108254	0	0.399116
A8MV81
A8MVV6;E9PN41;E9PPX8;E9PSH3;J3KQ42;O14817	0	0	0	0	0	0	0	0.837371	0.830591	0.492845	0.314514	0.274417	0.466143	1
A8MVZ6;Q96G01;Q96G01-3;Q96G01-4	0	0	0	0	0	0	0	0	0	1	0	0	0	0
A8MWD9;F5H013;P62308;Q49AN9	0.0090587	0	0.0951587	0.151752	0.143392	0.315643	0.215473	0.424461	0.426618	0.395429	0.584579	0.430859	0.550961	1
A8MXB7	0.627287	1	0.826666	0.57913	0.792706	0.477729	0.438774	0.30342	0.173777	0.129478	0.0316115	0	0	0.0968036
A8MXP9	0	0	0	0	0	0	0	0	0	0	0	0	0	1
A8MXV4	0.121748	0.100154	0.0854642	0.0311816	0.0182294	0.00133098	0	0.0273176	0.125012	0.17231	0.523927	1	0.786008	0.373363
A8MYA3;J3KQ25;Q8N6M9	1	0.143125	0.470014	0	0.0430474	0	0	0	0	0.860483	0	0	0	0
A8MYU2;E5RHP1
A8MYZ0	0	0	0	0	0	0.0217838	0	0	0.123057	1	0	0	0	0.462271
A8TX70;A8TX70-2;E9PAL5	0	0	0	0	0	0	0	0	0	0	0.669975	0.495897	1	0.814523
A9J4F5;O00488	0	0	0	0	0	0	0	0	0	0	0	0	1	0
A9X3U0;Q96GF1	0.256037	0.226338	0	0.0236432	0.0924264	0.420911	0.638429	0.724409	0.4975	0.578788	0.591785	1	0.599175	0.488135
A9Z1X7;E9PCT1;Q8IYB3;Q8IYB3-2	0	0.0713817	0.141564	0.209284	0.178195	0.193072	0.260976	0.239769	0.203415	0.230688	0.236635	0.594077	0.364721	1
B0QY89;Q9Y262	0.0455401	0	1	0.944721	0.792909	0.772708	0.561452	0.583767	0.45941	0.403117	0.335321	0.316014	0.352123	0.293883
B0QY95;Q9NQG6	0	0	0	0	0	0	1	0.776678	0	0.181575	0.357678	0.699859	0	0
B0QYF8;P02144	0.200609	1	0	0	0	0	0	0	0	0	0	0	0	0
B0QYK0;Q01844;Q01844-3;Q01844-5;Q01844-6	0.358399	1	0.0638446	0	0.197836	0.115989	0.385421	0.314103	0.361751	0.302865	0.202996	0.292425	0.841269	0.531685
B0QYN7;H3BQQ9;P63279	0.789821	1	0.428427	0.187743	0.252372	0.198385	0.219073	0.0637328	0.0573236	0.00940014	0	0.0200285	0.0710466	0.0956871
B0QYP2;O95931	0	0	0	0	0	0	0	0.362287	0	0	0	0.188885	0	1
B0QYW5;F6RTR7;O43808	0	0	0	0	0	0	0	0.232371	0.172639	0.598075	1	0.856388	0.192371	0.131228
B0QZ18;F2Z2V0;Q99829	0.947154	1	0.546675	0.502582	0.383856	0.252384	0.201475	0.139307	0.0633755	0.0637857	0.0128212	0	0.00958915	0.0360752
B0YIW2;P02656	0.297302	0.204497	0	0.0003743	0.136025	0.398571	1	0.928933	0.553193	0.381363	0.434247	0.71211	0.635748	0.4176
B1AH77;B1AH80;P15153	0	0	0	0	0	0	0	1	0	0	0	0	0	0
B1AH87;P30536	0.0330743	0	0.0552731	0.0922712	0.0239026	0	0.123932	0.212398	0.272137	0.275205	0.644236	1	0.766704	0.691824
B1AHA8;P09601	0.371166	0.228226	0	0.149098	0.0594593	0.559271	1	0.883217	0.635934	0.539037	0.213642	0.375146	0.435538	0.525676
B1AHB1	0.804678	0	0.214493	0.25751	0.253466	0.346545	1	0.0243625	0.150828	0.0314958	0.0211281	0	0.0172363	0
B1AHL2;P23142;P23142-2;P23142-3;P23142-4	0.703181	1	0.745669	0.448654	0.392755	0.219936	0.181866	0.099003	0.0692502	0.0668083	0.0487062	0	0.0835637	0.0884379
B1AHR2	0.90365	1	0.236003	0.173329	0.221077	0.139933	0.230112	0.0835955	0.0772189	0.0499569	0.00627043	0	0.00719199	0.0833618
B1AJQ6;Q86Y82	0.209801	0	0.179467	0.237196	0.452467	1	0.886234	0.916296	0.517979	0.347555	0.380935	0.261169	0.173883	0.381611
B1AJS1;O14525;O14525-2;O14525-3	0	0	0	0	0	0	0	0	0	0	0	0	0.0654137	1
B1AK53	0	0	0.377078	0	0.34696	0.147008	0.161998	0.788897	0.953372	1	0.684255	0.52435	0.509113	0.430187
B1AK61;Q5VTY9;Q5VTY9-2;Q5VTY9-3;Q5VTY9-5;Q5VTY9-6;Q5VTY9-7	0	0	0	0	0	1	0	0	0	0	0	0	0	0
B1AK88;P47756-2	0.657177	1	0.797286	0.90063	0.555573	0.559943	0	0.365144	0.35694	0.380838	0.291142	0.0912535	0.00518072	0.127688
B1AKC9;P29323;P29323-2;P29323-3	0.684659	0	0.309609	0.76831	0.667128	0	1	0.213051	0.304723	0.0632361	0.167142	0	0	0.191402
B1AKG0;Q03591	0	0	0	0	0	0.45602	0.871923	0.468138	0.402123	1	0.256859	0.47735	0.101311	0
B1AKI6;Q9NUK0;Q9NUK0-2	0.0978466	1	0.0759956	0.0748899	0.279023	0.543279	0.230877	0.0440406	0.0753273	0.0236404	0.0047118	0	0	0.019822
B1AKL4;Q9NRA8;Q9NRA8-2;Q9NRA8-3	0	0	0	0.110555	0.433765	0.368735	1	0.372904	0	0.26962	0	0	0	0
B1AKR6;Q9NP97	0.444613	0.780938	1	0.909728	0.993006	0.76818	0.821122	0.437329	0.270971	0.220953	0.00921521	0.0687465	0.0585451	0
B1AL05;H0Y6Y8;Q8N983;Q8N983-2;Q8N983-3;Q8N983-4;Q8N983-6;Q8N983-7	0	0	0.00566418	0.0298312	0.0326226	0.069399	0.0591668	0.0955779	0.122467	0.246684	0.795795	1	0.511333	0.32299
B1AL69;Q7L3B6	0.445429	1	0.416211	0.369066	0.291794	0.190627	0.136856	0.100912	0.0800305	0.0485592	0.0423532	0	0	0.0309893
B1ALA9;P60891	0.174836	0.247609	1	0.85383	0.645399	0.351009	0.196287	0.142481	0.0747601	0.0391318	0.0308636	0	0.0208656	0.0398198
B1ALD1;Q9Y6B7	0	0	0	0.424213	0.786446	0.176674	1	0	0	0	0	0	0	0
B1ALM5;Q9P0T7	0.221251	0	0.104216	0.127586	0.392931	0.851503	1	0.824551	0.387332	0.565016	0.496601	0.277316	0.179472	0.263334
B1ALY0;Q8IXS6-2	0.544722	1	0.251916	0.181825	0.246129	0.121441	0.111932	0.0428575	0.0789478	0.0250158	0	0.0146777	0.0232414	0.0303854
B1AM21	0	0	0	0	0	0	0	0.0341433	0	0.312598	0.248453	1	0.72	0
B1AM27;O14795;O14795-2	0.585675	1	0.769346	0.776252	0.782717	0.559546	0.64915	0.409636	0.431943	0.389285	0.190508	0.357073	0	0.267071
B1AMI2	0	0	0	0	0	0	0	0	0.283902	0.0941204	0.261492	0.525575	1	0
B1AMN7;Q9P2B4	0.0540802	0.609761	0	0	0.054955	0.265409	0.264555	0.28213	0.616017	0.559886	0.524088	0.513498	1	0.297701
B1AMS2;Q14141;Q14141-2;Q14141-4	0	0.2656	0.216383	0.112535	0.178379	0.115204	0.328673	0.322222	0.518354	0.561308	0.494381	0.828747	1	0.63208
B1AMW1;H0YDI1;P19256;P19256-2;P19256-3	0	0	0	0	0	0.11329	0.233942	0.32742	0.5267	1	0.667523	0.572102	0.199514	0.416139
B1ANE6	0	0	0	1	0	0.466306	0	0	0	0	0	0	0	0
B1ANH0;B1ANH2;Q16774;Q16774-2	0.751611	1	0.367129	0.247734	0.264267	0.176584	0.283498	0.0619895	0	0.049282	0.243271	0.470286	0.361874	0.215467
B1APN9;O75335	0	1	0	0	0	0	0	0	0	0	0	0	0	0
B1APR7;Q99504;Q99504-2;Q99504-3;Q99504-4;Q99504-5	0	0	0.727653	1	0	0.303858	0	0	0	0	0	0	0	0
B1AQK6;B1AQK7;E9PDR3;F6RH32;Q00975;Q00975-2	0	0	0	0	0	0	0	0	0	0	0	1	0	0.41179
B1AQP5;O75618;O75618-2;V9GY27	0	0	0	0	0	0	0	0	0	0	0	0	0	1
B1AVT0;P49760;P49760-3	0	0	0	0	0	0	0	0	0	0	0	0	1	0
B1AXG1;B4DG22;B7ZB17;P51812	0.788455	1	0.584752	0.504303	0.352797	0.247291	0.140743	0.127232	0.0922036	0.0817113	0.0671775	0	0.0250698	0.0868956
B2RC85;B2RC85-2;H0YFY2;P0C881	0	0	0	0	0	1	0	0	0	0	0	0	0	0
B2WTI3;B2WTI4;K7EJU9;Q6NYC1;Q6NYC1-2;Q6NYC1-3	0	0	1	0	0	0	0	0	0.762585	0	0	0	0	0
B3EWG3;B3EWG5;B3EWG6	0.67545	1	0.263877	0.263849	0.231532	0.148506	0.189398	0.0389455	0	0	0	0	0	0
B3KP42	0	0	0	0	0	0	0	0	0.0435065	0.0406668	0.118376	0.312992	0.175739	1
B3KP96;H0Y626;J3QKY5;K7EL43;K7ENN8;O95361;O95361-2	0	0	0	0	0	0	0	0.265636	1	0.431369	0	0	0	0
B3KS81	0	0	0	0	1	0.727348	0.303024	0.357297	0.177418	0	0	0	0	0
B3KT41;Q496J9	0	0	1	0	0	0	0.506716	0.341894	0.325428	0.384714	0	0.881446	0	0.517137
B3KTM8;H0YLJ3;Q9UBU8-2	0.166867	0.127523	0.0294422	0	0.0346737	0.0240011	0.0239995	0.125503	0.174293	0.0706655	0.122895	0.310483	0.443683	1
B3KUS5;Q70CQ3
B3KVY5;F5GWA4;F5GWK6;F5H268;Q9H3F6;Q9H3F6-2;Q9H3F6-3	0	0	0	0.0676117	0.177832	0.324	0.0748203	0.328476	0.269157	0.241762	1	0.840245	0	0.494905
B3KWA8;F8VZJ5;O43306;O43306-2;O95622;O95622-2	0	0	0	0	0	0	0	0	1	0	0	0	0	0
B3KY94;O14735;O14735-3	0.0725626	0	0.056559	0.118476	0.187568	0.579827	0.476262	1	0.648343	0.654833	0.594563	0.804887	0.325831	0.455089
B4DDD6	0.57324	1	0.187046	0.175513	0.185271	0.209141	0.125332	0.113758	0.220972	0.200745	0.0259311	0	0.0269156	0
B4DDF4;B4DUT8;Q99439	0.677649	1	0.256939	0.24098	0.309424	0.198918	0.160894	0.19326	0.176206	0.181303	0.132683	0.0376771	0	0
B4DDX3;H7C1L4;Q8TCB7	0	0	0	1	0	0	0	0	0	0	0	0	0	0
B4DEE8;P16455	0	0.881935	0.374156	0.171411	0.60752	0.408719	1	0.535812	0.751074	0.239385	0.18445	0.268631	0.406182	0.207879
B4DEN4;B8ZZ56;E7EV05;E9PFU9;Q8WV99;Q8WV99-2	0	0	0	0	0	1	0.461643	0	0	0	0	0	0	0
B4DFC0;E9PMV6;E9PR50;G3V1B4;H0YD20;H0YE53;H0YEL8;Q9UGK8;Q9UGK8-2	0	0	1	0.60449	0	0	0.221488	0	0	0	0	0	0	0
B4DFG5;K7EMR4;K7EMW3;Q9BZJ4;Q9BZJ4-2
B4DI03;K7EJQ7;Q9BY50	0	0	0	0.0519016	0	0.393739	0.610077	0.836575	0.932669	0.856974	0.941258	0.839333	1	0.62664
B4DJ07	0	1	0	0	0.273836	0.208676	0	0	0	0	0	0	0	0
B4DJ62;C9JM82;E7EPG2;E7EQM7;E7EX32;F8W9E5;G3XAH0;Q99719;Q99719-2	0	0	0	0	0	0	0	0	0	0	0	0	1	0
B4DJC3
B4DJV2;O75390	0.0525013	0.0211236	0.0183302	0.00966846	0.00259986	0	0.00339671	0.0210038	0.0525155	0.135031	0.702199	1	0.550075	0.293568
B4DJV5;Q13610	0.902273	0.950174	1	0.655714	0.599672	0.552421	0.402891	0.257257	0.138217	0.156807	0.219658	0	0	0.149297
B4DK73	0	1	0	0	0	0	0	0	0	0	0	0	0	0
B4DK77;Q9H6K4	0	0	0	0	0	0	0.0568378	0.0718677	0.179614	0.245108	0.935484	1	0.613825	0.506226
B4DL54	1	0.972943	0.492873	0.480867	0.375856	0.412384	0.291986	0.118729	0.145486	0.0365745	0.067804	0	0	0
B4DLJ1	0	0	0.407169	0	0.254395	0.0265257	0.0317442	0.0339778	0.0682912	0.0772727	0	0	0	1
B4DLN1	0	0	0	0	0	0	0	0	0.349425	0.120548	0	0.552717	1	0.144591
B4DLP0;B8ZZF7;O00338;O00338-2	0.69077	1	0.394642	0.263065	0.331085	0.121634	0.086371	0.0131577	0.103863	0	0.0425012	0.134081	0.0428286	0.00264034
B4DR61;P61619	0.0228049	0	0.00552791	0.0241822	0.0251681	0.0820795	0.108717	0.191148	0.242666	0.350321	0.770806	1	0.477629	0.304843
B4DR80;Q9Y6E0;Q9Y6E0-2	0.273781	1	0.338986	0.115112	0.151112	0	0.171361	0.240936	0.479278	0.341182	0.147133	0.113119	0.129911	0.0606514
B4DUC8;Q13126	1	0.699019	0.424409	0.400161	0.477527	0.269374	0.314919	0.19512	0.0605567	0.0404643	0.00514043	0	0.00882286	0
B4DUJ5;Q8IWP9	0	0	0	0	0.0955211	0.259543	0.235963	0.425212	0.894071	1	0.531593	0	0.0614993	0.331463
B4DVL7;Q9NQ25-3;Q9NQ25-4;Q9NQ25-5	0	0	0	0	0	0.214628	0	1	0.0829615	0	0	0	0	0
B4DVN3;E7ESC7;Q7L5Y9;Q7L5Y9-3	0.335145	0.165449	1	0.731974	0.55221	0.361951	0.234846	0.17071	0.12517	0.0971875	0.173693	0	0.00601829	0.509024
B4DVT3;Q96SY0	0	0	0.0248948	0.097229	0.489678	0.389816	1	0.329755	0.12325	0.345186	0	0	0.14703	0.546914
B4DWG0;B4E372;O95199;O95199-2
B4DXZ6;P51114	0	0	0	0.0181677	0.255327	0.230006	0.568581	0.57073	0.779197	0.724995	0.728911	1	0.957807	0.934453
B4DYU2;H3BQV3;Q96MW5	0.849247	0.891209	0.972757	0.999595	0.895883	1	0.736203	0.474571	0.403995	0.275631	0.0741598	0	0.109276	0
B4DYY6;Q75T13;Q75T13-2;Q75T13-3	0	0	0	0	0	0	0.262334	0.975879	1	0.406165	0.921451	0.393225	0	0
B4DZK5;Q9HAQ2;Q9HAQ2-2
B4E0E3;G3V1M5;Q9H6X4;Q9H6X4-2;Q9H6X4-3	0.0821846	0	0.302838	0.277085	0.429408	0.580619	0.814573	0.555335	0.531306	0.369873	0.263848	0.403596	0.243555	1
B4E0T2;P50542;P50542-4	0.381913	1	0.278316	0.127761	0.205402	0.120235	0.0257521	0	0.311949	0.467196	0.45318	0.573483	0.120019	0.170132
B4E0Y9;Q8NBY1;Q9P289	0	0	0	0.27269	0	0	1	0	0	0	0	0	0	0
B4E107;F5GXE4;O95260-2	0.642833	1	0.697878	0.494845	0.508743	0.235945	0.192415	0.169415	0.155357	0.0225273	0.14003	0	0	0.0932685
B4E1G1;Q9BUN8;Q9BUN8-2	0.102907	0	0.127267	0.127651	0.33621	0.637317	0.584268	1	0.636358	0.59014	0.363843	0.539998	0.279066	0.494605
B4E1Q4;O14730	0.250245	0.94039	0.921829	1	0.728485	0.581263	0.54568	0.275379	0.170972	0.125796	0.0430706	0	0.0757337	0.112945
B4E1Z4	0.0555567	1	0	0.0886377	0.0252771	0.182556	0.296533	0.256177	0.321279	0.333109	0.185842	0.479635	0.272934	0.19959
B4E2Q0;P98194;P98194-4	0	0	0.323386	0.425746	0.513386	0.843792	1	0.685235	0.164068	0.180014	0	0	0	0
B4E3T4;Q93062;Q93062-2;Q93062-3;Q93062-4;Q93062-5	0.256827	0.813653	0	0.124731	0.479905	0.542022	0.360485	0.308451	0.464407	0.627871	0.773618	1	0.647355	0.819696
B5MBZ0	0	0	0	0.407061	0	1	0.432359	0.626199	0.860075	0	0	0	0	0
B5MC20;P0C870	0.506076	1	0.49908	0.0720522	0	0	0	0	0	0	0	0	0	0
B5MC22;Q9UDX5	0	0	0	0	0.0212371	0.0313476	0.151176	0.218226	0.407325	0.366656	0.47152	1	0.779805	0.676226
B5MC35;B5MCA1;B5MD16;Q96G28;Q96G28-2	0.356517	1	0.598293	0.485792	0.313585	0.0124047	0.0813694	0.176196	0.0848924	0.210117	0.190726	0.138262	0	0.656195
B5MC51;P53671-3	0	0	0	0	0	0.216663	0.439856	0	1	0.235202	0.145878	0	0	0
B5MC53;B5MCF8;E7EX18;G5E9F5;P39210	0	0	0	0	0	0	0	0	0.190897	0.05818	0.276935	0	0.413011	1
B5MCA4;P16422	0	0	0	0	0	0	0	0	0.550889	1	0	0	0	0
B5MCF4;C9JDC5;P05230;P05230-2	0.555254	1	0.178544	0.16536	0.107902	0.103077	0.0190408	0.0430618	0	0.0119046	0	0	0	0
B5MCF9;O00541;O00541-2	0	0.0662152	0.0167244	0.0926708	0.0719856	0.0409581	0.0325503	0.00221519	0.0924664	0.0641541	0.0881795	0.100694	0.0562038	1
B5MCQ6;B5MCU6;B5MCV5;E7ETT9;Q96DB2;Q96DB2-2	0.699817	0	0	0	0	0.486912	0.174124	0	1	0.744397	0	0	0.136041	0.448601
B5MCX7;C9JX82;D3YTC9;F8WB76;H7C3L3;Q6NXT1;Q6NXT1-2	0	1	0	0	0	0	0	0	0	0	0	0	0	0
B5MD46;F8W9Y7;F8WCD1;H0Y2U5;H0Y5R9;H7C1Q1;H7C471;Q9BXI6;Q9BXI6-2	0	0	0	0	0	0	0	0	1	0	0	0	0	0
B5MDF5;J3KQE5;P62826	0.833379	1	0.418946	0.341663	0.367863	0.129867	0.15517	0.0320447	0.0251632	0.0122118	0.0231901	0	0.019662	0.0250513
B5MDL5;P53778;P53778-2	1	0	0	0	0.0708408	0	0	0	0	0	0	0	0	0
B5MDU6;Q9H6V9;Q9H6V9-2	1	0	0.00896187	0.0324158	0.036568	0.209316	0.191833	0.391005	0.444139	0.291434	0.252587	0.332462	0.348052	0.264768
B5ME97;E7EW69;E7EX04;Q9P0V9;Q9P0V9-2;Q9P0V9-3	0.218561	0	0.0412363	0.0827923	0.201755	0.216649	0.206019	0.290674	0.390281	0.34701	0.402772	0.514413	1	0.601251
B5MEF5;Q8TER0;Q8TER0-3;Q8TER0-4;Q8TER0-5	0	0	0	0.0616434	0.0765641	0.38012	0.290683	0.720634	1	0.729279	0.670714	0.639217	0.471609	0.984601
B7WNH4;E9PLH2;E9PNA8;E9PP42;M0QYU9;M0R0R3;M0R2G5;Q9BQ49	0	0	0	0	0	0.629313	1	0.28187	0	0.112742	0	0	0	0
B7WNR7;Q5HYL7-4	0.379229	0	1	0	0	0.353166	0.17521	0.0393007	0.903988	0.909057	0	0.408961	0.507321	0
B7WP74;Q9HCG8	0.0242192	0	0.465551	0.141692	0.118722	0.10802	0.140556	0.0696035	0.0827105	0.104583	0.129384	0.210176	0.231795	1
B7WPE2;Q32P44	0.925033	0.886602	1	0.774575	0.62969	0.360896	0.354512	0.155032	0.21071	0.2344	0.0389736	0	0	0.132726
B7WPG3;C9IYN3;Q8WVV9;Q8WVV9-4;Q8WVV9-5;V9GYK2	0.409842	0.933961	0.468585	0.419154	0.193119	0.120399	0.071824	0.0449135	0.154037	0.0515689	0	0.129471	0.421149	1
B7WPL0;Q9NVN3;Q9NVN3-1;Q9NVN3-3	0.110665	0	0.330712	0.793858	0	0.63875	1	0	0.201649	0.342755	0.152172	0.153291	0.123995	0
B7WPL9;F8W9A8;Q6PFW1;Q6PFW1-2;Q6PFW1-3;Q6PFW1-4;Q6PFW1-5;Q6PFW1-6;Q6PFW1-7	1	0.234279	0.635237	0.335509	0	0.151057	0	0	0	0	0	0	0	0
B7Z1G8
B7Z278;Q8WZA2;Q8WZA2-2;Q8WZA2-3;Q8WZA2-4;Q8WZA2-5	0.0738097	1	0.330579	0.440361	0.327971	0.286293	0.190257	0.173556	0.313433	0.240064	0.160058	0.306388	0	0.230266
B7Z2D2;H7C4Y6;Q8NHQ1;Q8NHQ1-4;Q8NHQ1-5	0	0	0	0	0	0	0	0	0	0	0	1	0	0
B7Z2R2;P14927;P14927-2	0.019572	0	0.00271402	0.00805262	0.0092605	0.0289184	0.0705322	0.107773	0.207187	0.284164	0.712752	1	0.594714	0.465881
B7Z2R7;Q5T8D3;Q5T8D3-2;Q5T8D3-3	0.154087	0.181367	0.0199646	0.0582923	0	0.0249867	0.118531	0.300055	0.658938	0.960708	1	0.963954	0.722878	0.260466
B7Z2X5;H0YDC6	0	0	0	0	0	0.366005	0	0	0.487612	0.348553	0	0	0	1
B7Z493;E9PJX4;F8VWL3	0.858537	1	0.22303	0.168484	0.201727	0	0.0326057	0.00499093	0.124378	0.141638	0.0990615	0.284166	0.0874934	0.078174
B7Z4L1;B7Z4U3;E7EPD9;E7EPW5;E9PCV1;G3XAH9;H7BXS2;Q9NRC1-2;Q9NRC1-3;Q9NRC1-4;Q9NRC1-5;Q9NRC1-6	0	0	0	0	0	0.234115	0.215772	0.555509	0.510947	0.579895	0.583883	1	0.670172	0.470427
B7Z4S1	0.597971	1	0.554131	0.386926	0.245147	0.256952	0.0820652	0.156638	0.0953433	0.039901	0.0752564	0	0.000295249	0
B7Z4W8;E9PD09;Q96HH9;Q96HH9-2;Q96HH9-3;Q96HH9-4;Q96HH9-5
B7Z5P7;O60711;O60711-2	0	0.342055	0	0.515314	0	0.19866	0.272388	0.277198	1	0.936869	0.954195	0.498155	0.697511	0.189931
B7Z6D5;Q96GQ7	0	0	0	0	0	0.13259	0.027406	0.0983199	0.126737	0.073289	0.18778	0.188923	0.248077	1
B7Z6J7;H7C148;O75175	0.115327	0.705721	0	0.359895	0.475563	0.660139	0.809999	0.986472	0.777427	1	0.561317	0.973839	0.931104	0.0838821
B7Z6Q0;Q12980	0	0	0	0	0	0.460116	1	0.158084	0.292242	0.256427	0	0	0	0
B7Z7D2;E9PQY3;P11117	0.558562	0	0.198975	0.273945	0.282603	0.794889	0.879517	1	0.496686	0.376229	0.205674	0.140294	0.109597	0.164476
B7Z7P8;P62495;P62495-2	0.556123	1	0.804923	0.671542	0.356562	0.260779	0.0906143	0.162206	0.128322	0.232899	0.0657494	0.271768	0.131934	0
B7Z8H2;O14717;O14717-2;O14717-3;O14717-4;O14717-5;O14717-6;Q7Z3E4	0	1	0.261506	0	0.407233	0	0.912964	0.169713	0.517469	0.808881	0	0	0	0.19947
B7Z8Q8;Q6NUS8	0.0758203	0	0	0.0891962	0.190629	0.350283	0.569381	0.844206	1	0.749405	0.978625	0.767835	0.670415	0.758677
B7Z9C2;F5H4R6;F8VV59;F8VY35;F8W020;F8W0J6;F8W118;F8W543;H0YH88;H0YHC3;H0YIV4;P55209;P55209-2	0.994637	1	0.447579	0.189423	0.601586	0.272629	0.392014	0.28446	0.0940874	0.126481	0.00515476	0	0.0395945	0
B7Z9I1;P11310;P11310-2;Q5T4U5	0.0542753	0.036466	0.0269541	0.0108961	0.00722668	0.00640634	0	0.0194575	0.0360754	0.108818	0.66974	1	0.673968	0.486887
B7ZAP0;F5H8L0;Q5R372-5;Q5R372-6;Q5R372-7;Q5R372-8	0.865541	1	0.485441	0.376144	0.349295	0.239903	0.381443	0.122239	0.04358	0.0842299	0.0998724	0	0	0
B7ZAQ6;B7ZAQ6-2;B7ZAQ6-3;P0CG08	0	0	0.352844	0.20998	0.722275	1	0.661621	0.839779	0.633024	0.592422	0.687601	0.45507	0	0.298143
B7ZBB8	0	0	0	0.742022	1	0.544003	0.658667	0.506947	0.137815	0.186255	0	0	0	0
B7ZBC8;B7ZBC9;O75449	0	0	0	0	0	0	0	0	0	1	0	0	0	0
B7ZC38;Q9NR46	0.681661	1	0.262241	0.277023	0.287237	0.311092	0.350843	0.163239	0.138067	0.100834	0.0176216	0.0081211	0.0515631	0
B7ZKQ9;Q8WTV0-2;Q8WTV0-4	0.187242	0	0.0671326	0.0855252	0.0907855	0.252552	0.248746	0.594437	0.995182	1	0.81833	0.638378	0.392388	0.661226
B7ZL48;C9J7L3;Q460N3;Q460N3-2	0.156512	0	0.411626	1	0	0	0	0	0	0.157855	0.191155	0	0	0
B7ZL88;Q8N8Q8	0	0	0	0	0.0185325	0.0155675	0.0518672	0.0957714	0.160607	0.21888	0.554185	1	0.701247	0.637018
B7ZLQ8;E5RJM0;Q17RY0;Q17RY0-2	0	0	0	0	0.0992923	1	0.525294	0.328094	0.846291	0.820813	0.0219103	0	0.528168	0.868907
B7ZM68;Q6ZNL6;Q6ZNL6-2	0	0	0	0	0	0	0	0	1	0	0	0	0	0
B8ZZ19;H0Y3U0;P20472	0.870395	1	0.333783	0.13447	0.107725	0.133221	0.0756164	0.0109156	0	0	0	0	0.00215056	0.00455686
B8ZZ47;H0Y714;Q96G21	0	0	0	0	0	0	0	0	0	0	0	0	0	1
B8ZZ50;B9A044;C9JEL3;O60573;O60573-2	0	0	0	0	0.39928	0.174814	0.289963	0.746354	0.723392	0.784314	1	0.482251	0.602578	0.234545
B8ZZ98;Q8WVK2	0	0	0	0	0	0	0	0	0.0992926	0.0943157	0	0	0	1
B8ZZ99;F8WCZ3;Q96NT0;Q96NT0-2	0	0	0	0	0.462343	0.606803	0.89144	0.906013	1	0.747056	0.639682	0.681366	0.42449	0.59829
B8ZZD4;Q86VP1;Q86VP1-2;Q86VP1-3;Q86VP1-4	0.631197	0	0.131926	0	0.0755527	0	0.630108	0.123878	0.564244	0.599849	0.40746	1	0.30804	0.621045
B8ZZF5;C9J5M4;Q9H8M9	0.08976	0.0209595	0.0389854	0	0.0661865	0.187072	0.243292	0.528599	0.779082	0.871219	0.705566	0.660957	0.489187	1
B8ZZJ6;H7C1S9;Q8TD22	0.0262141	0	0.0221479	0.0285402	0.0279697	0.0471393	0.0669486	0.102276	0.20482	0.221948	0.641826	1	0.596976	0.492102
B8ZZK5;O43924	0.670112	0.814898	0.281487	0.265528	0.686697	0.147521	1	0	0.0918616	0	0	0	0	0
B8ZZQ6;P06454;P06454-2	0.477027	1	0.0472585	0.053707	0.0349693	0.0398746	0.0231821	0.0185522	0.0138806	0.0109464	0.00183313	0	0.00516333	0.0166177
B8ZZU8;Q15370;Q15370-2	0.712028	1	0.364634	0.388609	0.425358	0.341373	0.138524	0.187378	0.0869354	0.0833642	0.125426	0.0447452	0.0272961	0
B8ZZV9;B8ZZX2;Q9H8M1;Q9H8M1-2	0	0	0	0	0	0	0	0	0	0.238001	0.470303	1	0.425636	0.487098
B8ZZY8	0	0	0.202823	1	0.805966	0	0	0	0	0	0	0	0	0
B8ZZZ1;F8W8K9;G5E966;Q96PC3;Q96PC3-2;Q96PC3-3;Q96PC3-4	0	0	0	0	0	1	0.941096	0	0	0	0	0	0	0
B9A057;Q86WW8	0	0	0	0	0	0	0	0.159173	0.223849	0.746429	1	0	0.706971	0
B9A063;Q6PIF6	0	0	0	0	0	0	0	0	0	0	0	1	0	0
B9EGA3;J3KMX2;Q92925;Q92925-2;Q92925-3	0	0	0.0257406	0.0325895	0	0.0296866	0.0333928	0.0533625	0.0710274	0.120765	0.125117	0.228169	0.197076	1
B9EJG8;B9EJG8-2;D6RAQ9;D6RDW6	0	0	0	0.466783	0.283736	1	0.280918	0.576091	0.53262	0.747768	0.437154	0	0.100132	0
B9TWZ6;K7EKS6;Q9Y2X0;Q9Y2X0-2;Q9Y2X0-3;Q9Y2X0-4;Q9Y2X0-5;U3KQ43;U3KQB4	0	0	0	0	0	0	1	0	0	0	0	0	0	0
B9ZVN9;O95602	0	0	0	0.205201	0	0.317428	0.296647	0.422226	0	0.385835	0.507745	0.393947	0.670201	1
C4AMC7;Q6VEQ5	0.407329	0.640671	0.134077	0.309744	0.404893	1	0.858328	0.532845	0.176746	0.141186	0.026159	0	0.0456029	0.130201
C4B7M2;Q96JI7;Q96JI7-2;Q96JI7-3	0.351456	0	0.431846	0.305494	1	0.629065	0.248736	0.458226	0.398807	0.122755	0.560821	0.0729862	0.198102	0.0711337
C4P0D6;C4P0D8;Q99598	0.667706	1	0.792955	0.646963	0.476487	0.26662	0.233505	0.199026	0.0859147	0.0880467	0.0121407	0	0.0268107	0.0222253
C9IYN7;C9J2D6;C9J9N8;C9JA82;C9JEX8;C9JLH5;Q0PNE2;Q0PNE2-2	0	0	1	0.878462	0.795279	0.0954766	0	0	0.112726	0.049852	0	0	0	0
C9IYT0	0	0	0	0	0	0	0	0	0	0	0	0	0	1
C9IZ93;C9J9P8;C9JF62;Q969M7;Q969M7-2;Q969M7-3;Q969M7-7	0.771296	1	0.109389	0.123416	0.152542	0.0851437	0.118437	0.0584726	0.0432559	0.0326259	0.0489871	0	0.0438397	0
C9IZF6;P41247	0	0	0	0	0	0	0	0	0	0	0.615203	1	0.95889	0.40522
C9IZL5;C9JC87;C9JMG3;C9JWL4;F8WCR6;H0Y6K1;O00189	0	0	0	0	1	0	0	0	0	0	0	0	0	0
C9IZN0;Q9NRM6;Q9NRM6-2	0	0	0	0	0	0	0	0.664542	1	0	0	0	0	0
C9IZU8;C9J9T0;Q96AT9	0.417014	1	0.254202	0.239428	0.197532	0.0985825	0.145167	0.0644359	0.0513399	0.0310725	0.0101881	0	0.0070801	0.0105496
C9J050;C9JEJ2;P49585	1	0.29998	0.0250275	0	0.047276	0.0426041	0.0294913	0.052944	0.0217613	0.0591697	0.06402	0.0786872	0.127594	0.17175
C9J066;E9PN67;Q8N4C6;Q8N4C6-10;Q8N4C6-11;Q8N4C6-2;Q8N4C6-4;Q8N4C6-5;Q8N4C6-6;Q8N4C6-7;Q8N4C6-9	0.155405	0	0.268487	0	0	0	0	0	0.0869586	0.958675	0	1	0.667172	0.761406
C9J0A4;P57723;P57723-2	0	1	0	0	0.339925	0	0	0	0	0	0	0	0	0
C9J0A7;Q9UQN3;Q9UQN3-2	0.439043	1	0.183302	0.132391	0.173018	0.110611	0.073187	0.0719887	0.0612001	0.050873	0.0176652	0.00848759	0	0.0101572
C9J0I9;Q86WB0;Q86WB0-2;Q86WB0-3	0.406511	0.743269	0.325551	0.159713	0.12079	0.0247717	0.0456446	0	0.0495923	0.0778796	0.116305	0.327445	1	0.639566
C9J0J0;Q96EE4	0	0	0	0	0	0.774868	1	0.130427	0	0	0	0	0	0
C9J0J7;G5E9Q6;P35080-2	0.980675	1	0.520766	0.463883	0.40888	0.224447	0.141401	0.134652	0.0561632	0.0603304	0.0458874	0	0.0296	0.0305627
C9J0K6;P30626;P30626-2;P30626-3	0.586717	1	0.369144	0.248117	0.250276	0.160244	0.120403	0.0646112	0.0454018	0.0363539	0.0133917	0	0.00195227	0.0293008
C9J159;F5H6W4;Q9H992	0	0	1	0.79325	0	0	0.604416	0	0	0	0	0	0	0
C9J165	0	0	1	0.960744	0	0	0	0	0	0	0	0	0	0
C9J1C6;Q9P0P0	0.518957	1	0.349368	0.31531	0.380488	0.214774	0.157641	0.121313	0.0936759	0.0111555	0.0297757	0	0	0.0111024
C9J2C0;Q9NY65;Q9NY65-2	0.618754	1	0.569172	0.70232	0.485396	0.234317	0.185881	0.31521	0.111127	0.237788	0.0113898	0	0	0.203564
C9J2P9;Q75N03;Q75N03-2	0	0	0	0	0	0	1	0	0	0	0	0	0.390314	0.118258
C9J2Y9;P30876	0.0953699	0.117925	0.288524	0.205085	0.1387	0.0283578	0.0501706	0.00576856	0.0250455	0.0699757	0	0.0889267	0.0712333	1
C9J365;C9JA28;Q9UNL2;Q9UNL2-2	0	0	0	0	0	0	0	0.950771	0.0280329	0.299663	0	0.171724	0.102571	1
C9J384;Q9BQ75;Q9BQ75-2	0	0	0	0	0	0	0	0	0	0	0	0	0	1
C9J3D7;Q9UKG9;Q9UKG9-3	0.690726	0.835468	0.508892	0.4913	0.233571	0.0359968	0	0.0962788	0.424704	0.858305	1	0.919836	0.854021	0.229141
C9J3R8;E7ETS9;O60513	0	0	0	0	0.334512	0.917492	1	0	0	0	0	0	0	0
C9J406	0.0195879	0	0.00209904	0.0075005	0.00957346	0.0333289	0.0490071	0.138912	0.255205	0.293953	0.748731	1	0.594026	0.440594
C9J494;Q9H000;Q9H000-2	0.296073	0.592985	1	0.699163	0.504905	0.679038	0.535276	0.46321	0.520549	0.329508	0	0.109211	0.0411393	0.684529
C9J4X5;Q96EU6;Q96EU6-2;Q9H160;Q9H160-2	0	0	0	0	0	0	0	0	0	0	0.161056	0	0	1
C9J4Z3;P61513	0.0208747	0	0.103384	0.163978	0.188388	0.233426	0.374855	0.323578	0.458684	0.447074	0.717009	1	0.641544	0.479386
C9J555;J3QLM1;J3QLS1;Q14849	0	0	0	0	0	0	1	0	0.143762	0	0	0	0	0
C9J597;C9JF31;Q9BV87	0.99418	0	0	0	0.604881	1	0	0	0	0	0	0	0	0
C9J5D1;E7EQ69;Q9GZZ1	0.0997173	0	0.527983	0.91754	0.883046	1	0.639505	0.727428	0.476254	0.402327	0.116511	0.00728138	0.15113	0.175852
C9J5N1;Q9BTE6;Q9BTE6-2;Q9BTE6-3	0.645332	1	0.523175	0.42345	0.376299	0.202136	0.258441	0.18333	0.0963986	0.0780525	0.0291193	0	0.054465	0.0252255
C9J6G3;C9J7M1;O95749	0.680105	1	0.473766	0.421457	0.310396	0.311065	0.125608	0.198971	0.0903351	0.152623	0.071606	0	0	0
C9J6K0;Q13103	0	0	0.0763468	0	0	0	0	0	0	0	0	1	0	0
C9J6K3;C9JM54;Q9HC52	0	0	0	0	0	0	0	0	0.0626429	0.0437611	0.24935	0.0995548	0	1
C9J6P4;Q7Z2W4	0.0105294	0.0151037	0.0179631	0	0.0106516	0.122539	0.0859042	0.279988	0.503813	0.472176	0.749421	0.946017	1	0.774209
C9J6W0
C9J712;P35080	1	0.602582	0.996701	0.634507	0.641919	0.308498	0.0511759	0.187235	0.129349	0	0	0	0	0
C9J758;Q969T7;Q969T7-2	0.613593	1	0.397091	0.257395	0.26049	0.197976	0.121633	0.0660812	0.0225704	0.0326932	0	0	0.0415015	0.0383379
C9J798;E5RK78;E7ERK1;F5GXT2;F8W6L0;O43374;O43374-2	0.0719976	0	0	0	0.0374464	0	0	0	0	0	0.0415459	1	0.183806	0.936718
C9J7E5;Q9Y5L0;Q9Y5L0-1	0.714647	1	0.780713	0.598596	0.412691	0.197222	0.188906	0.106697	0.065941	0.0542195	0	0.0457937	0.128902	0.0641624
C9J7E8;Q9UL63;Q9UL63-2
C9J7K9;C9J9P4;H7C5I5;O15162;O15162-2	0.208522	0	0	0.120557	0.37919	0.365397	0.538449	0.923648	1	0.68433	0.944867	0.868042	0.451269	0.84421
C9J813	0.193772	1	0	0.0146114	0.0624147	0.0383135	0.00112341	0.0593088	0.342958	0.522387	0.467267	0.144888	0.47659	0.211829
C9J826
C9J8B8;Q969S8;Q969S8-2	0	0	0.480409	0	0	0	0	1	0	0	0	0	0	0
C9J8I8;F5H364;F5H7Q6;P41221;P41221-2;Q9H1J7	0	0	0	0	0	0	0	0	0	0	0	1	0	0
C9J8S2;Q99969	0.0697029	0	0.0505187	0.0190077	0.183247	0.6823	1	0.667068	0.594904	0.450655	0.415189	0.530881	0.483974	0.565095
C9J8T4;C9JYN7;O43567	0	0	0	0	0	0.44837	1	0.757275	0.465082	0.298819	0	0.081609	0.277341	0.131382
C9J8W4;E9PBQ4;F5GXF0;F8W6I3;H7BZ00;P22736;P22736-2;P43354;P43354-2	0	0	0	0	0	0.0592027	0	0.383727	0.103317	0.223676	0	0	1	0
C9J975;E7ESL9;Q96P47;Q96P47-2;Q96P47-3;Q96P47-4;Q96P47-6	0	0	1	0	0.965616	0	0.249408	0	0	0	0	0	0	0
C9JA08;Q96D46	0.433281	0.178476	0.762438	1	0.602776	0.540268	0.48761	0.266097	0.42897	0.0739884	0.00355592	0.267796	0	0.144748
C9JA90	0	0	0	0	0	0	0.133278	0	1	0.580047	0	0	0	0
C9JAX1;Q16595	0.143282	0.221325	0.0172801	0.0216564	0.0201859	0.0172949	0	0.0185394	0.0760842	0.17894	0.339545	1	0.592991	0.284912
C9JB28;C9JPS5;Q6ZMH5	0.18368	0	0.176831	0	0	0.373879	0.772844	0.693928	1	0.616305	0.778659	0.834524	0.637759	0.887844
C9JB30;Q9UPY8	0.795981	1	0.598733	0.708883	0.676284	0.559437	0.350128	0.355589	0.262401	0.213586	0.0341292	0.0254466	0.116503	0
C9JB56;H7C4P1;P42331;P42331-3;P42331-4;P42331-5;P42331-6	0	0	0	0	1	0	0	0.245202	0	0	0	0	0	0
C9JBG5;E9PMC3;F5H8L4;Q8NBJ9;Q8NBJ9-2	0.40052	0	0.276413	0.486503	0.544142	1	0.607354	0.633428	0.521056	0.291045	0.221937	0.192927	0.119731	0.446571
C9JBI3;P78330	0.848306	1	0.494672	0.363224	0.294834	0.15352	0.145764	0.063101	0.0399233	0.0262278	0.0139156	0	0.00483147	0.0380175
C9JBY7;Q9Y291	0	0	0	0	0	0	0	0	0	0	0.663017	1	0	0.714638
C9JCC6;E9PQX9;Q14919;Q14919-2	0.744909	0.660975	0.460574	0.177476	1	0.293754	0.506243	0.407574	0.701111	0.556971	0	0.21987	0.00276971	0.538609
C9JCU6;F2Z2B3;F8WCP4;Q12851;Q12851-2	0	0	1	0	0	0.418289	0.259458	0	0	0	0	0	0	0
C9JD37	0	0	0	0	0	0	0	0	0	0.500795	0.68268	0	1	0
C9JDZ2;Q9NVQ4;Q9NVQ4-2;Q9NVQ4-3	1	0.493883	0	0.171431	0	0.0720796	0	0	0	0	0	0	0	0
C9JEG3;Q9UBQ6	0	0	0	0	0.152363	1	0.551416	0.457676	0	0	0	0	0	0
C9JEH3;C9JG97;Q13685	0.657286	1	0.454115	0.421318	0.279903	0.259268	0.191929	0.108948	0.093479	0.0790944	0.0193243	0	0.0404059	0.0332224
C9JEK0;C9JP86;Q08AI8	0.748344	0	0.489363	0	1	0	0	0	0	0	0	0	0	0
C9JER6;P61366	0	0	0	0	0	0	0	0	0.666618	0	1	0	0	0
C9JF50;E9PLU1;E9PRK5;E9PRW1;E9PSD6;Q9H019;Q9H019-2;Q9H019-3	0	0	0	0	0	0	0	0.166967	0.2115	0.644205	0.585921	1	0.704456	0
C9JFE4;Q13098;Q13098-5;Q13098-7	0.625531	0.968587	1	0.836549	0.601185	0.42527	0.18524	0.218753	0.108431	0.0723823	0	0.00729629	0.0192222	0.0223584
C9JFR7;P99999	0.18888	0.154662	0.025105	0.0261917	0	0.0233646	0.0745058	0.0804822	0.199499	0.18601	0.634712	1	0.585491	0.279802
C9JFV4;Q8IZL8	0	0.344129	0.112205	0.16138	0.189096	0.108258	0.205053	0.118757	0.174973	0.115633	0.168403	0.278477	0.240014	1
C9JFX4;E9PLG6;E9PSD9;Q6IA17;Q6IA17-2	0	0	0.225319	0.415318	0.607031	1	0.578437	0.618851	0.480309	0.329774	0.449777	0.166907	0	0.298761
C9JG87;Q9NYK5;Q9NYK5-2	0	0	0	0	0	0.0355229	0.0420101	0.137799	0.198342	0.262167	0.760945	1	0.724917	0.52168
C9JGT3;G5E9C5
C9JH00;O75155;O75155-2	0	1	0.881054	0.47557	0.376087	0.224269	0.201032	0.07519	0	0	0	0	0	0
C9JHD7;C9JJK9;Q86YP4;Q86YP4-2;Q86YP4-3	0	0	0	0	0	0	0.149262	0	0	0.0457554	0	0	0	1
C9JI98	0	0	0	0	0	0	0	0.978881	0.784546	1	0	0	0	0.852641
C9JIF9;P13798	0.587051	1	0.961513	0.789447	0.511563	0.325975	0.176941	0.181645	0.0699949	0.0440002	0.0394746	0.00561	0	0.0433639
C9JIT1	0	0	0	1	0	0.316868	0.176091	0	0.318695	0.0697461	0.625882	0	0.21742	0
C9JIZ6;P07602;P07602-2;P07602-3	0.308728	0.256531	0	0.135831	0.165179	0.864039	0.797698	1	0.559603	0.667785	0.503223	0.447405	0.193729	0.229878
C9JJ19;P82930	0	0	0	0	0	0.116374	0.0544051	0.0757835	0.108368	0.122218	0.335586	1	0.77403	0.703854
C9JJM2;Q96MV1;S4R434	0	0	0	0	0	0.349239	0.906041	0.721132	0.424391	1	0	0	0	0
C9JJN9;Q8N3P4;Q8N3P4-2;Q8N3P4-3	0	0	0.557645	1	0.450139	0.480338	0.527407	0.481741	0.453429	0.398086	0	0	0	0
C9JJT5;G3V325;P56134-2;P56134-4	0	0	0	0	0	0	0.0199501	0.0885573	0.150405	0.231752	0.545961	1	0.631057	0.581947
C9JJX6;E9PDC3;O00192;O00192-2	0.0461654	0	0	0.0653682	0.0283965	0.0537674	0.115609	0.340176	0.657746	0.530672	0.426364	0.580729	0.53687	1
C9JK83;O95630;O95630-2	0.936135	1	0.218638	0.535599	0.456895	0.38211	0.492024	0.221159	0.0472035	0	0	0	0	0
C9JKL2;C9JPX5;O95772;O95772-2	0	0	0	0.371476	0	0.475322	0.495158	1	0.427274	0	0	0	0	0
C9JLB7;Q96HP4;U3KQU8	0.122025	0.0342609	0.121638	0.0382267	0.014479	0	0	0.0505957	0.0550255	0.116834	0.599064	1	0.589679	0.44271
C9JLU1;P52434;P52434-4	1	0.857082	0.57951	0.443928	0.332432	0.207059	0.116997	0.0971033	0.10458	0.0683768	0.0758048	0	0.0705821	0.452334
C9JLW8;I3L2L5;I3L4Q0	0.679606	1	0.111773	0.134561	0.00431068	0	0.501675	0.270709	0.313082	0.119998	0.15394	0.309173	0.313676	0.191437
C9JNE2;Q9Y530	0.0736741	0.773774	0	0.0834842	0	1	0.574323	0.105464	0.0673837	0.0939292	0.0740836	0.0906708	0.84579	0
C9JNI1
C9JNW5;C9JXB8;P83731	0.0243761	0	0.066718	0.134238	0.13369	0.20318	0.250176	0.466938	0.632968	0.620564	0.905636	1	0.958866	0.379164
C9JNZ0;C9JRY4;Q96IW7
C9JP16;O75718	0	0	0	0.0742773	0.143469	0.303107	0.665324	0.981686	1	0.759965	0.550362	0.701714	0.546574	0.362006
C9JP85;Q16656;Q16656-2;Q16656-4	0	0	0	0.0269871	0.0180085	0.0198151	0.0151606	0.127103	0.155057	0.065102	0.253209	0.103782	0.244343	1
C9JPG5;Q13275;Q13275-2	1	0.318177	0.526981	0.193383	0.384056	0.141154	0	0	0	0	0.042663	0	0	0.0348711
C9JPI6
C9JPQ6;Q9BYB4;Q9BYB4-2	1	0	0.381722	0.643051	0.261245	0.164146	0	0	0	0	0	0	0	0
C9JPU9;H3BS93;H3BSZ1;P05108-2
C9JQ41;H7C525;Q4VC31	0.520184	0.582644	0.059524	0.00386826	0.122044	0.270661	0.118743	0	0.175453	0.188831	0.289336	1	0.790087	0.283449
C9JQ60	0	0	0.862573	1	0.552994	0	0	0	0	0	0	0	0	0
C9JQD4;O43447	0.818551	0.841792	0.357749	0.299743	0.212725	0.0964096	0.067916	0.187453	0.0235717	0	0.163965	0.239566	0.171558	1
C9JQH3;J3KQW6;Q86UV6;Q86UV7	0	0	0	0	0	0	0	0	0	1	0	0	0	0
C9JQI7;C9JQI7-2;D6RC30	0	0	0	0	0	0.307737	0.272156	0.500931	1	0.500745	0.439355	0	0.156703	0.694249
C9JQS9;E7ETT1;E7ETT4;E7EX59;E9PDR0;P05166;P05166-2	0.0247694	0.00318317	0.0308624	0.0232724	0.024252	0.0108817	0	0.011044	0.0501349	0.116008	0.562842	1	0.769685	0.455113
C9JQV0;H7C0T1;H7C2R9;Q9BRJ6	0	0	0	0.0778129	0.432139	0.406253	0.399865	0.452663	0.560834	0.561327	0.481267	0.804429	1	0.637804
C9JQX2;Q86VD9	0	0	0	0	0	0	0	0	0	1	0	0.464916	0	0
C9JR56	0	0	0	0	0	0	0	0	0	0.0542684	0.444502	1	0.601229	0.0289605
C9JRD2;P25686;P25686-2	0.579292	1	0.20068	0.149181	0.123373	0.0961618	0.048656	0.0331864	0.0417628	0.039	0.00341283	0.0364365	0	0.026716
C9JRZ6;Q9NX63	0.0143632	0.000814384	0	0.00408299	0.00774662	0.0215602	0.0423729	0.110829	0.203083	0.291844	0.688575	1	0.506571	0.279762
C9JRZ8	0	0	1	0	0	0	0	0	0	0	0	0	0	0
C9JS50;Q687X5	0	0	0	0	0	0.105866	0	0.652434	1	0.966094	0.277487	0.701152	0	0
C9JSU1;Q9Y608;Q9Y608-2;Q9Y608-4;Q9Y608-5	0.248085	0.473589	0.22601	0.18236	0	0.244698	0.424598	0.310479	0.632292	0.765756	1	0.922445	0.691186	0.96035
C9JUQ8	0.0337107	0	1	0.871273	0.0618737	0.0621277	0.433357	0	0	0.0725693	0	0	0	0.346286
C9JW74;C9JWU9;Q5EB52;Q5EB52-2;Q5EB52-3	0	0	0	0	0	0	0.045618	0	0.280333	0.29237	0.728003	1	0	0.451604
C9JXB2;Q9NS98	0	0	0	0	0	0	0	1	0	0	0	0	0	0
C9JXF9;P08833	0	0	0	0.225461	0.195375	1	0.500283	0.612906	0.822608	0.843368	0.542109	0	0	0
C9JXM5;G5E9W1;Q7Z3E1	0	0	0	0.127189	0	0	0.358953	0.266887	1	0.235985	0.119794	0.0321505	0.276164	0.265713
C9JY79;M0QZQ3;Q9H254;Q9H254-4	0	0	0.164192	0	0.0858702	0.0121222	0.131888	0	0	0.234773	1	0.777344	0.768407	0.226802
C9JYJ6;Q4L180-3;Q4L180-5;Q4L180-7	0	0	0.0275526	0	0.067836	0.0872783	0	0.0341968	0.110418	0.227895	0.938707	1	0.616403	0.527325
C9JYM0;O75817	0	0	0.247978	0.0781369	0.303644	0.131621	0.379582	0.462506	1	0.669619	0.432454	0.585828	0.492452	0.717301
C9JYS5;J3KS67;J3QL47;J3QL63;K7ENL4;Q96ET8-3;Q9NYZ1	0	0	0	0	0.283514	0.607471	1	0.183364	0.0402407	0.294313	0.261383	0.141423	0.0739874	0.185976
C9JZ38	0	1	0	0	0	0	0	0	0	0	0	0	0	0
C9JZB3;Q16821
C9JZF7;G5E9W2;Q9P2E5;Q9P2E5-2	0	0	0	0	0.398824	1	0.369179	0.74673	0.504815	0	0	0	0	0
C9JZG9;C9JZY6;P62256	0.641981	1	0.392727	0.312197	0.423785	0.256977	0.289986	0.126376	0.0965571	0.0731334	0	0.00389765	0.0146566	0.0273798
C9JZI1;P35249;P35249-2	0	0	0.216296	0.288221	0.189237	0.310738	0.313859	0.297043	0.370485	0.329439	0.335407	0.348037	0.316877	1
C9JZI7	0.4708	1	0.339942	0.315565	0.353077	0.236475	0.147664	0.0938682	0.0500871	0.0327048	0.00889767	0.0156696	0.0200675	0
C9JZR2;O60716;O60716-10;O60716-11;O60716-13;O60716-2;O60716-3;O60716-5;O60716-9	0.0942307	0.025549	0	0.0214963	0.0512449	0.0996659	0.167212	0.371861	0.729721	0.64704	0.613566	0.705106	0.51286	1
C9K058;Q9H2H8	0.753152	1	0.268787	0.229839	0.292075	0.224127	0.195729	0.154196	0.0691321	0.0829059	0.0181832	0	0.00917446	0.0451656
C9K0C8;Q9NS00;Q9NS00-2	0	0	0	0	0	0.897915	1	0	0	0	0	0	0	0
C9K0E5
C9K0I9	0	0	0	0	0	0	0	0.446442	0.566253	0.72383	1	0	0	0.144208
D1MQ08;M0R1J0;O15554	1	0.965239	0	0.137232	0	0	0	0	0	0	0	0	0	0
D3DQV9;H0Y3P2;P78344;P78344-2	0.0312803	0.385452	0.922013	1	0.858868	0.722183	0.528876	0.712215	0.757113	0.714248	0.381224	0.418257	0.48586	0
D3DRR9;Q86WR7;Q86WR7-2	0	0	0	0	0	0	0	0	0.906748	1	0	0	0	0
D3DUJ3;K7EIE9;K7EQG9;P17706;P17706-2;P17706-3;P17706-4	0	0	0	0	0	0.505883	0	0.547872	0.674496	1	0	0	0	0
D3DWX8;P98173;P98173-2;P98173-3;Q5HY75	0	0	0	0	0.0643496	0.548422	1	0.299928	0.129214	0.123656	0	0	0	0.186554
D3K2X1	0	0	0	0	0.727846	0.175047	1	0	0	0	0	0	0	0
D3YTA9;F6U1T9;P63098	0.445275	1	0.265308	0.200271	0.218954	0.177072	0.188657	0.0985055	0.131129	0.0864234	0.025143	0.0458225	0.026839	0
D3YTC7;Q9UBM1;Q9UBM1-2;Q9UBM1-3	0	0	0	0	0	0	0	0	0	0	0	1	0	0
D5H3J5;Q2L6G2	0	0	0	0	0.0578917	0.20567	0.22064	0.320434	0.611685	0.803425	0.977783	1	0.536298	0.281716
D6R927;D6R946;D6R9K5;D6R9X3;D6RA45;D6RAT2;D6RB37;D6RBQ8;D6RCM1;D6REC2;D6REP3;D6RF98;D6RIV8;D6RIZ8;Q06330;Q06330-4;Q06330-5;Q06330-6;Q06330-7	0	0	0	0	0	0	0	0	0	0	0	0	0	1
D6R938;Q13557;Q13557-10;Q13557-11;Q13557-12;Q13557-3;Q13557-4;Q13557-5;Q13557-6;Q13557-8;Q13557-9	0.459814	1	0.775359	0.817297	0.675215	0.237856	0.031939	0.0857207	0.302689	0	0.0651755	0.111419	0.310135	0.280726
D6R9C7	0	0	0	0	0	0	1	0.409794	0	0	0	0	0	0
D6R9P3	0	0.139395	0.0257493	0.0317275	0.0213268	0.104012	0.105782	0.133237	0.206018	0.249843	0.223241	0.511161	0.438777	1
D6R9P8;Q6AWC2;Q6AWC2-4;Q6AWC2-6	0	1	0.843049	0.574528	0.239439	0.219624	0.128408	0.171276	0	0.0924696	0	0	0	0
D6R9R5	0	0	0	0.493767	0	0.905037	0	0.762081	1	0	0	0	0	0
D6R9S2;D6RIC1;H0Y8L2;H0YEZ3;H0YJP6;P59282	0	0	0	0	0	0.828344	0.205535	1	0	0	0	0	0	0
D6R9S7;D6RDB0;D6RHE3;Q96GZ6;Q96GZ6-2;Q96GZ6-5;Q96GZ6-6;Q96GZ6-7;Q96GZ6-9	0	0	0	0	0	0	0.616764	1	0.652583	0.39611	0	0	0	0
D6R9Z7;P15954	0.0194279	0	0.00165806	0.0073152	0.0199401	0.0265541	0.0374382	0.0846327	0.119991	0.266978	0.545229	1	0.435507	0.276746
D6RA25	1	0	0	0	0	0	0	0	0	0	0	0	0	0
D6RA47;D6RE79;D6RIZ4;Q14728	0	0	0	0	0	0	0	0.789483	1	0.343367	0	0	0	0.494197
D6RA57;D6RC31;D6RE67;H0Y9X1;Q96EY4	0	0	0	0	0	0	0	0	0	0	0	0	0	1
D6RA82;P12429	0.646758	1	0.285128	0.290254	0.224331	0.205186	0.0691467	0.0685383	0.0304042	0.0137043	0.00470829	0.0101204	0	0.0197771
D6RA96;Q9NZ71;Q9NZ71-2;Q9NZ71-4;Q9NZ71-6;Q9NZ71-7;Q9NZ71-8;X6R5I7	0	0	0	0	0	0.302177	0.405017	0	0	0	0	0	0	1
D6RAD4;P50613	0	0.276177	0.146012	0.378825	0.543513	0.21173	0.325234	0.206682	0.311993	0.281231	0.389754	0.464694	0.524271	1
D6RAD5
D6RAJ6;Q9UKT5;Q9UKT5-2	0	0	0	0	1	0	0	0	0	0	0	0	0	0
D6RAN1;D6RF83;D6RH06;H7BYK4;Q9NR12;Q9NR12-2;Q9NR12-3;Q9NR12-4;Q9NR12-5;Q9NR12-6	0.411122	0.789179	0	0	0.0176023	0.267564	0.173759	0.45627	0.634908	0.816747	1	0.941298	0.668154	0.993765
D6RAN8;H7C5U8;Q9P0M9	0	0	0	0	0	0	0	0	0.0436497	0.222677	0.257897	1	0.347235	0.380992
D6RAR4;Q04756	0	0	0	0	0	0	0	1	0	0	0	0	0	0
D6RAZ0;E9PD12;F2Z2L2;H0YAM8;Q96AX9;Q96AX9-11;Q96AX9-13;Q96AX9-14;Q96AX9-2;Q96AX9-3;Q96AX9-5;Q96AX9-6;Q96AX9-7;Q96AX9-8
D6RAZ3;E7EMP6;Q96FZ2	0	0	0.347611	0	0.237894	0.224349	1	0.399787	0.54394	0	0	0	0	0
D6RB81;Q9UHK6;Q9UHK6-5	0.380742	0.583456	0.317762	0.266447	0.130369	0.01956	0	0.0558402	0.13433	0.347375	0.749829	1	0.72483	0.248565
D6RB89;P50120	0.767601	1	0.260756	0.237957	0.212104	0.137911	0.100796	0.080624	0.050077	0.0507565	0.0168744	0	0	0.020537
D6RBM8	0	0	0.288501	0	0	0	0.0954811	0	0	1	0	0	0	0
D6RBN6	0	1	0	0	0.405231	0	0	0	0	0	0	0	0	0
D6RBR7;Q9Y3S2	0.272132	0.170981	0.591837	0.506383	1	0.398169	0.954561	0.26483	0.261527	0.0817823	0	0	0.0391435	0.0204155
D6RBW1;P06730;P06730-2;P06730-3	0.887749	1	0.483827	0.413596	0.478437	0.246106	0.253489	0.158243	0.160822	0.147892	0.123075	0.220153	0.11586	0
D6RBY0;D6RJG8;Q8TAC1;Q8TAC1-2	1	0	0	0	0	0	0	0	0	0	0	0	0	0
D6RC47;D6REW1;Q9Y255;Q9Y255-2	0	0	0	0	0	0	0	0	0	0	0	1	0	0
D6RCC4;D6RCC9;Q8NEC7	0.804822	0.683512	0.334232	1	0	0	0	0	0	0	0	0	0	0
D6RCE7	0	0	0	0	0	0	0	0	0	0	0	0	0	1
D6RCM8;O95379;O95379-2;O95379-3;O95379-4	1	0.527408	0.19681	0.188554	0.191912	0.12434	0	0	0	0	0	0	0	0
D6RCP5;Q8N264;Q8N264-2;Q8N264-3	0.0544097	0.0179821	0.0277396	0.0279526	0.0251717	0.0509656	0	0.0562403	0.0899269	0.168657	0.864703	1	0.86229	0.314896
D6RDG3	0	0	0	0	0	0.0523486	0.464545	0.364444	1	0.512523	0.300839	0.190124	0.418759	0.24296
D6RDG8;D6RGZ4;O43791	0	0	0	0	0	0	0.000479629	0	0.50908	0	1	0	0.37199	0
D6RDK6	0	0	0	0	0	0	0	0	0	0.118452	1	0.502173	0.0347153	0
D6RE84	0.48904	1	0.148352	0.0908961	0.0578113	0.152527	0.164016	0.25167	0.200099	0.164402	0.141906	0.170462	0	0.0145157
D6REA0;O75879	0.0523749	0.0665544	0.0331681	0.0349598	0.0367486	0	0.0203703	0.0126505	0.0574658	0.141851	0.676141	1	0.847519	0.45812
D6REK2;H0Y9T3;Q8WV44;Q8WV44-2;Q8WV44-4	0	0	0	0	0.584093	0.924837	0.284623	0.69664	0.903228	0.555656	0.743154	0	0.385569	1
D6RER5;D6RGI3;Q9NVA2	0.128867	0.14127	0	0.0441616	0.0774063	0.184291	0.268419	0.359254	0.526562	0.550065	0.56988	0.898833	1	0.482066
D6REX3	0.470827	0.756122	0.796577	1	0.905037	0.839668	0.447664	0.335612	0.152568	0.146499	0.0914285	0.00874252	0.0325992	0
D6REY2;P23508;P23508-2	0.449791	1	0.414973	0.0805689	0.292211	0.141541	0.415647	0.158953	0.168771	0.0334104	0	0	0	0
D6RF35;P02774;P02774-3	0.477666	0.361831	0.0901264	0	0.0285948	0.545781	0.652423	1	0.576482	0.420318	0.298694	0.283275	0.245879	0.0338887
D6RF43	0	0	0	0	0	0	0	0	0	0	0	0	0	1
D6RF44
D6RF47;D6RF94;Q9H1J5;Q9H1J5-2	0	0	0	0	0	0	0	0	0	1	0	0	0	0
D6RF48;Q9P2W9	0	0	0.271751	0.149477	0.353246	0.67961	0.779684	1	0.834472	0.631054	0.549402	0.679363	0.477489	0.562681
D6RF86;P55285;P55285-2	0	1	0	0	0	0	0	0	0	0	0	0	0	0
D6RFG8;P27707	0	0	0	0.540406	1	0	0	0	0	0	0	0.0699234	0	0.306683
D6RFI1	0	0.396282	0.519514	0.280564	1	0	0.243498	0	0	0	0	0	0	0.369175
D6RFI3;E7EQR8;Q9GZM5	0	0	0.264846	0.492265	0.479882	0.999811	1	0.500676	0.26879	0.315008	0.2196	0	0	0.532498
D6RGG3;Q99715;Q99715-4	0	0	0	0	0	0	0	0	0	0	0	0	0.182963	1
D6RGK3;D6RHW1;D6RIE8;D6RIV9;D6RIY1;Q16594;Q9HBM6	0	0.086982	0.0724965	0.0815212	0.037585	0.106717	0.0881854	0.153069	0.063767	0.103436	0.240426	0.00902765	0.280098	1
D6RGK9;H0Y9C1;H0Y9Z5;Q96LI5	0	0	0	1	0	0.981984	0	0.342464	0.742111	0	0	0	0	0
D6RGZ3;Q8N1W1;Q8N1W1-3;Q8N1W1-4;Q8N1W1-5;Q8N1W1-6
D6RH21	0	0	0	0.960163	0.506343	0	0.800332	1	0.537537	0.391004	0	0	0	0.258027
D6RHG0;P78383	0.377677	0	0.571003	0.229053	0.421571	1	0.744163	0.741677	0.72075	0.594202	0.633694	0.993196	0.353476	0.43662
D6RHH9;Q8TCT1;Q8TCT1-2;Q8TCT1-3	0.552581	1	0.612859	0.543955	0.151148	0.252772	0.0662478	0.0441014	0.0483218	0.0234387	0	0	0	0
D6RHX8;F8W9W2;P43250;P43250-2;P43250-3	0	0	0	0	0.142586	0.177776	0.292858	0.509175	0.890745	0.626536	0.454108	0.935987	0.603778	1
D6RIA8	0	0	0	0	0.534897	1	0	0	0	0	0	0	0	0
D6RID8;Q13888;Q6P1K8	0.0699541	0	0	0.0781067	0.0619046	0.0943983	0.130935	0.280749	0.358339	0.440544	0.530659	0.451528	0.301999	1
D6RIE3	0.0126991	0	0.00186201	0.0114286	0.0127083	0.0543507	0.0747925	0.191838	0.248791	0.275254	0.710419	1	0.638721	0.492706
D6RIG4;Q9HCL0;Q9HCL0-2	0.699461	0.536227	0.338648	0.27689	0.342988	0.281859	0.137641	0.0272163	0.345371	0.547638	1	0	0.647213	0.0190148
D6RIT3;Q8N1A6	0.903119	1	0.507679	0.33821	0.213622	0.126436	0.185103	0.0718488	0.0423196	0.0174281	0	0	0.0221075	0.0806077
D6RIY6;Q06265;Q06265-2	0.074818	0	0.234141	0.235326	0.232775	0.233865	0.305039	0.209104	0.248091	0.234376	0.270524	0.320016	0.314891	1
D6RJ90;Q9Y6G5	0.0842232	0.0114102	0	0.169424	0.412922	1	0.802848	0.317031	0.141776	0.136414	0.0611674	0.0732047	0.0218087	0.160122
D6RJG9;Q9Y5W7;Q9Y5W7-2;Q9Y5W7-3;Q9Y5W7-4	0	0	0.414621	0	0.0959688	0.308723	0.508772	1	0.774615	0.893231	0.12816	0.308996	0	0.237411
D6W5U7;Q8TBR4;Q9UJ98;Q9UJ98-2;Q9UJ98-3	1	0	0	0	0	0	0	0	0	0	0	0	0	0
E0CX11
E1CKY7;O60237;O60237-4;O60237-6	0	0	0	0	0	0	0	0	0.0646296	0.081926	0.5517	1	0.594585	0.100872
E2QRG8	0	0	0	1	0	0	0.758724	0	0	0	0	0	0	0
E2QRK7;Q5JTD0;Q5JTD0-2	0	1	0.310361	0.455699	0.461998	0.481086	0.725397	0.513397	0.647091	0.260349	0.0622974	0	0	0
E3W980;E3W982;Q8TDG4	0.604313	0.904901	0	1	0.72333	0	0.322101	0.202375	0.381407	0.0154906	0	0	0.0565552	0.279529
E5KLJ9;O60313-10;O60313-2;O60313-9	0.0535426	0	0.0301094	0.0299676	0.0527677	0.0781296	0.0844276	0.144554	0.278878	0.369838	0.842687	1	0.628793	0.362397
E5RFE0;E5RGT8;Q9UQ10	0.745602	1	0.471538	0.385173	0.298747	0.182196	0.118662	0.109564	0.0438915	0.0471566	0.0174511	0	0.0178409	0.0145849
E5RFF8;J3KNU2;Q8IX29;Q8IX29-2	0.0477017	0	0.127466	0.0296395	0.0813998	0.0741223	0.146792	0.14469	0.091333	0.148898	0.966839	1	0.446472	0.256768
E5RFP0
E5RFT4;Q8N4L2	0	0	1	0.720174	0.796193	0.809842	0.33295	0.97587	0.9241	0.688295	0.114629	0.138319	0.282851	0.462384
E5RFV7;O00300	0	0	0	0	0	0	0	0	0	0.230556	0	1	0.750176	0.823991
E5RG15;E5RHB3;Q8NBP0;Q8NBP0-2	0	0.0103716	0	0.222016	0	0.144971	0.24411	0.350656	0.551765	0.685873	0.850418	0.888828	0.6024	1
E5RG17;G5EA19;H0YBX2;Q6P1N9;U3KQS5	0.746514	1	0.336792	0.265248	0.329203	0.174812	0.183132	0.12219	0.0511546	0	0.0957036	0.122083	0.141867	0.0194027
E5RG29	0	0	0	0	0	0	0.436428	0.407729	0.701761	0.508039	1	0.591114	0.58288	0.265701
E5RG44;E5RGJ1;E5RIT1;Q629K1	0.0713609	0.0158195	0	0.0274423	0.0923277	0.324146	0.358069	0.537176	0.534797	0.592734	0.81169	1	0.960304	0.491237
E5RGB7;E5RGH1;H0YBV9;Q7Z388	0	0	0	0	0	0	0	1	0	0.219877	0	0	0	0
E5RGT2	0	0	0	0	1	0	0	0	0	0	0	0	0	0
E5RGU4
E5RGZ2;H0YKJ1;Q6NT76;Q6NT76-2;Q6NT76-3;Q6NT76-5	0	0	0	0	0	0	0	0.16562	0.0572511	0.728299	0.372823	0.442677	1	0.679643
E5RHC5;Q8N6T3;Q8N6T3-3	1	0.311989	0.105111	0.15814	0.128588	0.133189	0.0936666	0.111231	0.0440024	0.0570703	0.0517697	0	0.0423038	0.0462098
E5RHG8;Q15369	0.573429	1	0.40089	0.276015	0.366582	0.180778	0.280438	0.0632408	0.0369839	0.00992032	0	0.0112034	0.0328279	0.0292747
E5RHG9	0	0	0	0	0	0	0	0	0	0	0	1	0	0
E5RHW4;O94905	0.0936055	0	0.0244498	0.0695065	0.119226	0.362056	0.488075	1	0.854941	0.766416	0.52032	0.61894	0.479975	0.327826
E5RIA2;E7EUF1;Q13822;Q13822-2;Q13822-3	0	0	0	0	0	1	0	0	0.298583	0	0	0	0	0
E5RIA9;Q9UJ68;Q9UJ68-5	1	0.973326	0.320583	0.299574	0.329565	0.157689	0.0910374	0.0407709	0	0.0334203	0.184689	0.254921	0.193235	0.133856
E5RIH5;Q6NXR4	0	0	0.871874	1	0.702449	0.532282	0.281726	0.23438	0	0	0	0	0	0
E5RIK6
E5RIT6;Q9UNX3	0	0	0.102252	0.0895805	0.15179	0.188788	0.300987	0.246091	0.506938	0.471398	0.614645	0.882303	1	0.535437
E5RIW3;E5RJD8;O75347	0.505752	1	0.309763	0.202841	0.195962	0.139376	0.0753929	0.0449003	0.041419	0.0304167	0.0122685	0.000464338	0	0.0137255
E5RIW9;P28328	0	0	0	0	0	0	0	0.30055	0.533669	0	0	1	0	0
E5RJ29;Q9NYI0;Q9NYI0-2	0	0	0	0	0	0.237792	0	0.104613	1	0.659185	0.291865	0.70017	0.156232	0.328352
E5RJ36;H0YAX6;Q14CS0	0.1494	1	0.549722	0.124822	0.170454	0.238715	0.0716541	0	0	0.0621181	0.0401851	0	0	0
E5RJF8;E5RK82;O15182	0	1	0	0	0	0.121128	0	0.0308564	0.148599	0.0261342	0.131979	0	0.127749	0.659307
E5RJM6;E5RJM6-2;E5RJM6-3
E5RJN7;E7EPX0;E7EVI1;E7EVJ4;Q9NUL3;Q9NUL3-2;Q9NUL3-3;Q9NUL3-6;Q9NUL3-7;Q9NUL3-8	0	0	0	0.118554	0.183908	0.47521	0.256518	0.963858	0.858094	1	0.906157	0.416801	0.790976	0.373292
E5RK69	1	0.261563	0.347834	0.315396	0.0940078	0.0123684	0.0945749	0.155222	0.363242	0.226218	0	0.156825	0.107327	0.211538
E7EM64;Q7L5N1	0.824635	1	0.884767	0.749204	0.644847	0.431047	0.307042	0.415679	0.112921	0.189103	0	0	0	0.195572
E7EM72;E7EWQ4;O75912	0	1	0.451147	0	0.20766	0	0.278891	0	0	0	0	0	0	0
E7EMB1;Q9UH65	0.554907	1	0.381319	0.278471	0.218337	0.193979	0.0782071	0.0863621	0.0776669	0.0369354	0.0724167	0	0.0537496	0.0897542
E7EMC7;Q13501	0.201376	0	0.329243	0.219226	0.220486	0.361272	1	0.491146	0.761564	0.647953	0.521927	0.725946	0.510742	0.736951
E7EMD6;O43572	0	0	1	0.755922	0.49976	0.118723	0.151423	0.331255	0.170391	0.252098	0	0	0	0
E7EMK3;J3QLD9;Q14254	0.298476	0	0.163858	0.148042	0.132672	0.31721	0.319513	0.538452	0.694326	0.705553	0.618425	0.71939	0.522936	1
E7EMS2;G3V3D1;G3V3E8;J3KMY5;P61916	0.830014	0	0.206717	0.165536	0.3598	0.962039	0.811332	1	0.514958	0.420309	0.105361	0.306028	0.100366	0.0402936
E7EMT5;P04798	0	0	0	0	0.149195	0.705362	0.777229	0.821709	1	0.677022	0.134906	0.34113	0.203335	0
E7EMT6;E7ENY2;E7EQA9;E7EV32;E7EVA2;E7EW82;H7C3L4;Q92844	0.354643	0.906242	0.52309	0.414072	0.680891	0.442415	1	0.0191196	0.123779	0.0615875	0	0	0.0467331	0.0467018
E7EMZ9;E9PBC6;O95359;O95359-3	0.574091	1	0.180885	0.228254	0.402946	0.179412	0.217798	0.153891	0.145084	0.120759	0.0914407	0.104399	0.0434188	0
E7EN24;Q12864	0	0	0	0	0	0	0	1	0	0	0	0	0	0.556893
E7EN73;Q8IZA0;Q8IZA0-2	0	0	0	0	0.181591	0.896817	1	0.898651	0.520564	0.444361	0.28928	0	0.14558	0.253659
E7EN91;Q9BWF2	0.241773	0.438462	1	0.800137	0.837915	0.30271	0.339834	0.0204549	0.0553823	0.0958728	0	0	0	0.0240652
E7END6;P04070;P04070-2	0.425136	0	0	0.302805	0.207973	0.4873	0.574916	0.957449	0.770235	0.757823	0.906503	1	0.802315	0.534825
E7ENL6;P12111;P12111-2;P12111-4	0	0.0361734	0.0134201	0.00866756	0.00750773	0.00301064	0.00800055	0.0828341	0.0981127	0.168662	0.502369	0.487737	0.426005	1
E7ENT5;E7EV45;Q9ULF5	0	0	0	0	0	0	0	0	1	0	0	0	0	0
E7ENV7	0	0	0.0628099	0	0.23245	0.312367	0.498676	0.623786	0.90458	0.586153	0.593184	0.500728	0.485099	1
E7ENY0;E7EV99;P35611;P35611-2;P35611-3;P35611-6	0.344271	1	0.147953	0.0665888	0.0781917	0	0.0857828	0.156561	0.41814	0.427674	0.199361	0.389152	0.289113	0.460055
E7EP17;Q9NYC9;Q9NYC9-2	0.63262	1	0.200956	0.429051	0.223833	0.219966	0.127767	0.093659	0.196583	0.136509	0	0.0152993	0.159044	0.235292
E7EP72;Q9UFG5	0.346014	0.0314205	0.118216	0	0.228651	0.678428	0.988646	1	0.653044	0.482514	0.199363	0.369391	0.170078	0.233651
E7EPB3;P50914	0.0514818	0	0.0701447	0.173528	0.207647	0.333003	0.347013	0.403637	0.59993	0.492237	0.420459	1	0.665379	0.504308
E7EPG1;Q13201	0	0	0	0	0	0	0	0	1	0.306461	0.516255	0	0	0.426122
E7EPI0;Q9P2D0	0	0	0.0644018	0	0	0.207782	0.40237	0.621608	0.877112	0.662438	0.696366	0.901177	1	0.654056
E7EPK1;E7ES33;Q16181;Q16181-2	0.183032	0.204286	0	0.101962	0.112166	0.206743	0.0143209	0.445389	0.503364	0.662497	0.764276	0.853144	1	0.440747
E7EPN9;Q9Y520;Q9Y520-4;Q9Y520-5;Q9Y520-6;Q9Y520-7	0.473492	1	0.546934	0.287991	0.287889	0.243614	0.219455	0.219303	0.132138	0.231914	0.132095	0.438223	0.233908	0
E7EPS8;P28827;P28827-2	0.319023	0	0.148069	0	0.387918	0	0.66938	0.732965	0.810448	1	0.486019	0	0.262174	0.663007
E7EPT4;P19404	0.0184299	0.0126276	0	0.00495742	0.00306093	0.00858044	0.029297	0.0683431	0.124425	0.216337	0.412745	1	0.695299	0.285876
E7EQB2;E7ER44;P02788;P02788-2	0	0	0	0	0	0	0	0.041023	0.522598	0.830223	1	0.424836	0.38057	0.710562
E7EQH1;E9PMB7;E9PR55;Q8NFJ9;Q8NFJ9-2;Q8NFJ9-3	0	0	0	0	0	0	0	0	0	0	0.830682	0.286208	1	0.0839957
E7EQM8;J3QRM6;J3QS93;P43146
E7EQQ5;Q9C035;Q9C035-2;Q9C035-3;Q9C035-4;Q9C035-5;Q9C035-6	0	0.455243	0	1	0.359836	0	0	0	0	0	0	0	0	0
E7EQT3;Q9BY07-5	0.65953	1	0.323992	0.414717	0.305639	0.117289	0	0.00867617	0	0	0.00319507	0	0	0.0114481
E7EQT4;Q9UKV3;S4R3H4	0.26817	0.364916	0.0134898	0	0.0163104	0.0524953	0.0382913	0.0952408	0.140502	0.175046	0.222473	0.443853	0.590528	1
E7EQU1;E7ES08;E9PES6;O15347	0.381362	0.228429	0	0.0157539	0.0133717	0.0898902	0.179104	0.156684	0.246749	0.0911623	0.0819266	0.297516	0.418433	1
E7EQY1;Q96C01	0.188861	0.205739	0.105796	0	0.155965	0.135548	0.231845	0.257922	0.171059	0.353591	0.680373	1	0.818761	0.282124
E7ER45;O43451	0.317516	0.449895	0.00906033	0	0.0332812	0.366094	0.301033	0.741903	1	0.742975	0.496234	0.502652	0.237762	0.448221
E7ER77;Q7Z2K6	0.0915037	0.0485769	0	0.0518313	0.065765	0.226536	0.330831	0.554407	0.670131	0.694215	0.923719	1	0.766108	0.550751
E7ERI8;E7EW49;O75122-3	0.681531	1	0.632841	0.49706	0.319519	0.343751	0.350669	0.296422	0.248444	0.189795	0	0	0.0485186	0.227058
E7ERS3;Q86VM9	0.0127008	0	0	0.0709813	0.083279	0.21073	0.163117	0.188239	0.191191	0.281303	0.448604	0.776868	1	0.961098
E7ES96;P49768;P49768-2	0	1	0	0.43687	0.0651063	0.202142	0.270229	0.228937	0.390694	0.416522	0.343939	0.211465	0.251624	0.47246
E7ESA6;H0YBP1;Q05397;Q05397-7	0.606308	1	0.592997	0.364487	0.299757	0.0843065	0.151138	0.0876879	0.230545	0.0739155	0.080488	0.137425	0	0.107761
E7ESA7;P29474	0	0	0	0	0	0	0.015862	0.7485	1	0.722832	0.0730604	0	0	0.491806
E7ESC6;Q9UIA9	0.680305	1	0.895496	0.821714	0.562202	0.3417	0.213578	0.218834	0.128133	0.0646488	0.0532996	0	0.0780391	0.113828
E7ESD2;Q641Q2;Q641Q2-2	0.221599	0.536077	0.126716	0.325171	0.434387	1	0.68053	0.401362	0.146338	0.172242	0.0639063	0.115651	0	0.104289
E7ESF6;Q13094	0	0	0.0955135	0	0	0.36942	0.0592221	0.348285	0.383293	0.212958	0.721499	1	0.322573	0.648363
E7ESK6;E9PBI9;P34741	0	0	0	0	0	0.882383	1	0.504603	0.756453	0.925402	0.720101	0	0	0.685347
E7ESL0;J3KQY1;Q9NWU5;Q9NWU5-2;Q9NWU5-3	0	0	0.0491422	0.126763	0.080576	0.0448479	0.0608578	0.169515	0.170648	0.249602	0.92556	1	0.57277	0.465199
E7ESP4;P17301	0	0	0	0	0	0	1	0	0	0	0	0	0	0
E7ESS3;K7EKW3;Q71RG4;Q71RG4-2	0	0	0	0	0	0.196525	0.473293	1	0.837838	0.564711	0.494373	0.390428	0.462549	0.265185
E7ESU7	1	0	0	0	0	0	0	0	0	0	0	0	0	0
E7ESY4;H0Y4T7;Q13330;Q13330-3	0	0	0	0	0	0	0	0	0	0	0	0	0	1
E7ET49;Q8NCG7;Q8NCG7-2;Q8NCG7-4	0	0	0.382395	0	0.957504	0.708467	0.381547	1	0.512001	0.853391	0.458589	0	0	0
E7ET87;E7EVI4;O75410;O75410-10;O75410-2;O75410-3;O75410-4;O75410-5;O75410-6;O75410-7;O75410-9	0.637081	1	0	0.0994253	0.244634	0.310562	0.234866	0.258086	0.281688	0.308931	0.239619	0.190827	0.201372	0.012789
E7ETB3	0.291803	0.355055	1	0.713341	0.529068	0.348999	0.263859	0.17674	0.0641401	0.0402778	0	0.031603	0.00393484	0.0656794
E7ETH0;G3XAM2;P05156	0.171745	0.0920114	0	0.0410847	0.0873999	0.297463	0.941151	0.839468	1	0.686252	0.329628	0.322053	0.511563	0.38406
E7ETM6;Q8N2H4	0	0	0	0	0	1	0.989269	0	0	0	0	0	0	0
E7ETU5;F6Y5H0;P29558;P29558-2	0	0	0	0.12875	0.362096	0.396989	0.7173	0.308942	0.628997	0.609266	0.599339	0.608314	0.802684	1
E7ETU7;H0Y9G6;P09001	0	0	0.0367913	0.0387028	0.0489834	0.0670723	0.0317876	0.0247384	0.146468	0.168613	0.542099	1	0.551799	0.385102
E7ETY4;E9PC69;Q7KZI7;Q7KZI7-10;Q7KZI7-11;Q7KZI7-12;Q7KZI7-13;Q7KZI7-14;Q7KZI7-15;Q7KZI7-16;Q7KZI7-2;Q7KZI7-3;Q7KZI7-4;Q7KZI7-5;Q7KZI7-6;Q7KZI7-7;Q7KZI7-8;Q7KZI7-9	0.8083	1	0.820241	0.592925	0.529541	0.38536	0.423815	0.536825	0.640236	0.531195	0.519813	0	0.412631	0.667015
E7ETZ4;Q9Y6E2	0	0.953295	0.702068	0.784126	0.855168	0.838762	0.808635	1	0.882656	0.967791	0.523076	0.94222	0.605373	0.337755
E7EU04;F5GXV3;F5GZ45;F5H3Z4;F5H4Z6;J3KQP4;J3KR13;P14207	0	0	0	0	0	0.341859	0	0.658227	0.764771	0.556168	0.457757	0	1	0
E7EU05;E9PLT1;P16671;P16671-3	0.127874	0	0	0.0721565	0.0793369	0.228832	0.36721	0.50366	0.826134	0.804117	0.732117	0.878524	0.508469	1
E7EU13;Q96P48;Q96P48-1;Q96P48-2;Q96P48-3;Q96P48-4	0.883349	1	0.975397	0.875168	0.658612	0.46229	0.524194	0.235366	0.196364	0.154462	0.128565	0	0	0.102953
E7EU14	0.915161	1	0.840769	0.670595	0.553763	0.394248	0.32984	0.318422	0.207405	0.1872	0.130504	0	0	0
E7EU40;Q92959	0	0	0	0	0	0	0	0.85612	1	0	0	0	0	0
E7EUH7;Q96PZ0;Q96PZ0-2	0.706511	1	0.697968	0.709527	0.546566	0.284523	0.165315	0.236353	0.241224	0	0	0	0	0
E7EUJ7;Q8TC20;Q8TC20-2;Q8TC20-3;Q8TC20-5	0	0	0	0	0	0	0	0	0	0	0	0	0	1
E7EUU4;Q04637-8	0	1	0.219191	0.519582	0.50619	0.645425	0.50247	0.692047	0.49576	0.552215	0.356376	0.80489	0.534786	0.0422394
E7EUW0;H0YA74;Q9C0I3;Q9C0I3-2	0.696328	0	0	0.1202	0	0.163894	1	0.436228	0.24801	0.284784	0	0	0.0508757	0.0554544
E7EV01;O15484	0.0298803	0	0.0185367	0.0857861	0.112438	0.101058	0.151217	0.319787	0.552115	0.439358	0.453929	0.544667	0.446801	1
E7EV71;Q14766;Q14766-2;Q14766-4;Q14766-5	0	0	0	0	0	0	0	0	0	0.202437	0.31754	0	0	1
E7EVA0	0.541545	1	0.105592	0.119255	0.178637	0.190166	0.171492	0.25603	0.193163	0.191269	0	0.2168	0.331456	0.128833
E7EVC7;Q676U5;Q676U5-2	0.817014	1	0.688058	0.630858	0.492731	0.287065	0.26808	0.199336	0.10199	0.0688653	0.0526355	0.00292692	0	0.0627195
E7EVE9;P18074	1	0	0.0691685	0	0	0.199654	0.225408	0.225508	0.343553	0.325222	0.363504	0.731307	0.625758	0.597422
E7EVH7;F8W6L3;G3V2E7;G3V3H3;G3V5R9;Q07866;Q07866-10;Q07866-2;Q07866-3;Q07866-4;Q07866-5;Q07866-6;Q07866-7;Q07866-8;Q07866-9	0.350175	1	0.583696	0.520714	0.481163	0.358028	0.477402	0.28703	0.166861	0.0436982	0.187191	0	0	0
E7EVJ5;Q96F07;Q96F07-2	0	0	0	0	0	0.522635	1	0	0	0	0	0	0	0
E7EVQ6;Q14534	0.464701	0	0	0	0	0.220233	0.313924	0.896013	0.559974	1	0	0.201401	0.193015	0.167062
E7EVX8;Q8WWY3	0.206475	0.114279	0.217627	0.362019	0.282746	0.25154	0.00305434	0.121577	0.149286	0	0.155372	0.202819	0.445263	1
E7EW05;Q9NVU7;Q9NVU7-2	0	0	0	0	0	0	0	0	0	0	0	0	0	1
E7EWD3;O75077;O75077-2	0	0	0	0	0.134657	0.265133	0.778512	0.736489	1	0.658765	0.596666	0.519523	0.61652	0.870651
E7EWM1;Q15596	0	1	0	0.447837	0	0	0.233715	0	0	0	0	0	0	0
E7EWP0;H0Y886;O43674;O43674-2	0	0	0	0	0	0	0	1	0	0	0	0	0	0
E7EWR4;P33240;P33240-2	0.178887	0.877481	0	0.0981783	0.0510622	0.0170356	0.085413	0.0675422	0.0551418	0.0948905	0.111524	0.353789	0.31796	1
E7EWW0;Q7Z3J2	0.534646	0	0.616251	0.685718	0.546844	0.93027	1	0.533714	0.442771	0.393835	0.485866	0.457718	0.601233	0.621042
E7EWX8	0	0.954262	0	0.490188	0	0	1	0	0	0	0	0	0	0
E7EX17;P23588	0.32284	1	0.633321	0.55118	0.567779	0.679862	0.53112	0.380859	0.256437	0.278027	0.120763	0.118492	0.0895109	0
E7EX40;Q6WKZ4;Q6WKZ4-2;Q6WKZ4-3	0.173853	1	0	0.140737	0.112277	0.486158	0.183577	0.444145	0.0816202	0.147126	0	0	0	0.15697
E7EX44;Q05682-2;Q05682-3;Q05682-6	0.290929	1	0.0191422	0.0252499	0	0.010458	0.00706995	0.0950824	0.474054	0.680205	0.888736	0.587404	0.540028	0.689594
E7EX54	0	0	0.294542	0.407801	0	0	0	0	0	0	0	0	1	0
E7EX70;Q9GZS1	0	0	0	0	0	0	0	0	0	0	0.409954	0	0.119673	1
E7EX90;Q14203;Q14203-3;Q14203-4;Q14203-6	0.16888	0.213003	1	0.927269	0.674033	0.525872	0.363777	0.244216	0.135813	0.113401	0.0333742	0	0.0548788	0.0836081
E9PAM5
E9PAV3;E9PAV3-2;F8VZJ2;F8W0W4;H0YHX9;Q13765	0.484342	0.634122	0.429196	0.555295	0.595646	0.824214	0.815062	1	0.468269	0.441389	0.198964	0.179852	0.233312	0
E9PB18;Q6UXG2;Q6UXG2-2;Q6UXG2-3;Q6UXG2-4	0.629406	1	0	0	0	0	0	0.251419	0	0	0	0	0	0
E9PB51;Q9BWF3	0	0.0471723	0.0681129	0.0523265	0.152181	0.275341	0.45913	0.385788	0.472746	0.449166	0.377355	0.538323	0.600172	1
E9PB61;Q86V81	0.0483014	0	0.00607538	0.0164454	0.0630266	0.130865	0.185143	0.162534	0.197622	0.209872	0.291466	0.420155	0.254101	1
E9PB90;P52789	0	0	1	0	0	0	0	0	0	0	0	0	0	0
E9PBC1;F6PQP6;I3L2B2;I3L2H1;I3L356;O95208;O95208-2;O95208-3;O95208-5	0	0	0	0	0	0.113681	0.133855	0.558051	0.556901	1	0.568384	0.474673	0.224408	0.529326
E9PBF9;H7C2N6;P15336	0.0348572	0	1	0.423612	0	0.222475	0	0.0874283	0	0.0295705	0.0607651	0	0	0
E9PBP6	0	0	0	0.234681	0	0.361417	0	0	0.386006	1	0	0.689645	0	0
E9PBZ2;P15428;P15428-2;P15428-4	0.825265	1	0.515255	0.448769	0.398296	0.178402	0.167894	0.127964	0.0497313	0.0594451	0.031079	0	0.0121541	0.0311155
E9PC53;H7C3N0;Q8TBK2;Q8TBK2-2	0	0	1	0	0	0	0	0	0	0	0	0	0	0
E9PC54;Q03113;Q03113-2;Q03113-3	0	0	0	0	0	0	1	0	0	0	0	0	0	0
E9PC61;G4U4J3;Q8NDF8;Q8NDF8-2;Q8NDF8-3;Q8NDF8-5	0	0	0	0	0.0632568	0.142008	0.255051	1	0	0.104789	0	0	0.410455	0.537313
E9PC66;P17029	0	0	0	0	0.49775	1	0.620005	0.284687	0	0	0	0	0	0
E9PC87;O94876;O94876-2	0	0.11174	0	0.0469141	0.256597	0.76203	0.84745	1	0.872816	0.653548	0.536717	0.604325	0.600256	0.416196
E9PC90;H0YA62;P14635;P14635-2	0	0	0	0	0	0.185273	0.107314	0.166612	1	0.305026	0	0	0	0
E9PCD7;H0YA68;Q9Y2E5;Q9Y2E5-2	0.592858	0	0.381168	0.436379	0.299283	0.815347	0.891599	1	0.738184	0.42943	0.769207	0.634977	0.553838	0.685313
E9PCJ7;G3V336;Q8N806	0	1	0	0	0	0	0	0	0	0	0	0	0	0
E9PCN2;Q02153;Q02153-2	0.723991	1	0.614855	0.544586	0.492128	0.244322	0.143639	0.194844	0.154061	0.136347	0.101684	0	0.0435417	0.0431119
E9PCP0;F5H0S8;F5H100;F5H8J8;P16520;P16520-2	0.6287	0.0333356	0.0255227	0.0804172	0	0.0782602	0.344021	0.73707	1	0.902183	0.928926	0.317388	0.360661	0.702433
E9PCQ7;F8WD67;F8WD87;O43709;O43709-2;O43709-3	0	0	0	1	0	0	0	0	0	0	0	0	0	0
E9PCW1;G5E9T8;K7EJC8;O95249	0.314362	0	0.0400696	0.17877	0.241448	0.752305	1	0.506428	0.240729	0.215287	0.179369	0.177518	0.120236	0.1453
E9PCX2;P15121	1	0.949172	0.381473	0.352863	0.280996	0.126287	0.121983	0.116008	0.0373849	0.0260048	0.0168214	0	0.00310029	0.0253463
E9PCX5	0	0	0.177248	0	0.719953	0.436233	0.838689	1	0.857267	0.604051	0	0	0	0
E9PD50;Q92540;Q92540-2;Q92540-4	0.0102213	0.634027	0.652995	1	0.637074	0.827352	0.304855	0.893384	0.943489	0.682475	0	0.278163	0.645931	0.437347
E9PD53;Q9NTJ3;Q9NTJ3-2	0	0	0	0	0	0	0	0	0	0	0	0	1	0
E9PD68;Q14194;Q14194-2	0	0	0	0	0	0	0	0	0	0	1	0	0	0
E9PDE8	0	1	0	0.432611	0	0	0	0	0	0	0	0	0	0
E9PDN4	0	0	0	0	0	0	0	1	0	0	0	0	0	0
E9PE17;I3L0E3;Q9Y2R5	0	0	0	0	0	0	0	0	0	0	0	1	0	0
E9PEF1;O00408;O00408-3;O00408-4	0.596829	1	0.382007	0.361318	0.271477	0.110599	0.0772319	0.0192063	0	0.00438393	0.037264	0.0294474	0.0684667	0.00983016
E9PEJ6;H0Y547;P98196	0	0	0	0.10368	0	0.523903	0.364395	1	0.937972	0.73823	0.444824	0.373049	0	0.216281
E9PEP6;O14786	0	0	0	0	0	0.128086	0.274126	0.745795	1	0.941258	0.612805	0.278421	0.423122	0.762147
E9PEP7;P08048;P08048-2;P08048-3;P17010;P17010-2;P17010-3
E9PEQ6	0.441544	0.469652	0	0.694952	0.532197	0.540564	0.712568	0.115272	0.186747	1	0.154803	0.163027	0.270481	0.927325
E9PER6;O15530;O15530-2;O15530-3	0.851351	1	0.624469	0.576752	0.337751	0.225548	0.106309	0.0648143	0.14372	0.146802	0.0103985	0.00695429	0	0.182247
E9PEW8	0.919743	1	0.346909	0.241486	0.178919	0.140137	0.0906961	0.0124495	0.00538656	0	0.257038	0.552619	0.849177	0.640431
E9PEX6;P09622	0.107888	0.0145744	0	0.00320287	0.0327745	0.0123922	0.0263605	0.0226988	0.0710669	0.132405	0.650957	1	0.8263	0.452954
E9PF10;O75694	0.0857877	0	0.0802664	0.0428303	0.0114962	0.0192339	0.139414	0.0206416	0.0800878	0.0760069	0.102291	0.268269	0.104154	1
E9PF16;Q96CM8;Q96CM8-2;Q96CM8-3	0.0909429	0	0.0805844	0.0242073	0.0127312	0.0358382	0.0112005	0.029322	0.0497441	0.114902	0.594882	1	0.775401	0.513059
E9PF19;Q96E41;Q9Y4P3	0	0	0	0	0.0126011	0.0430215	0.0868396	0.146949	0.305667	0.307764	0.637963	1	0.603902	0.425176
E9PFF8	0	0	0	1	0	0	0	0	0	0	0	0	0	0
E9PFK5;P78316;P78316-2	0	0.1803	0	0.126273	0.0943023	0	0	0.0902749	0.17163	0.0660416	0.0575575	0	0.125526	1
E9PFK9;Q9UJ41;Q9UJ41-3;Q9UJ41-4	0.627216	1	0.44599	0.604141	0.708975	0.295512	0.327514	0.24031	0.15415	0.215588	0.0884246	0	0	0
E9PFR3;Q14738;Q14738-2;Q14738-3	0.908751	1	0.864169	0.719024	0.577963	0.428828	0.336135	0.297289	0.229545	0.220633	0.156012	0	0.0286573	0.170422
E9PFR9;J3KQJ8;Q96N96;Q96N96-2;Q96N96-3;Q96N96-5;Q96N96-6	0	0	0	0.00564548	0.013756	0.0359227	0.0353749	0.0239716	0.154196	0.158833	0.393229	1	0.403362	0.426786
E9PG19;O94868;O94868-2	0.216816	0.146655	1	0.429087	0.319895	0.341286	0.89742	0.23412	0.416894	0.330276	0.0751918	0	0	0
E9PG32;Q6ZR08	1	0.294711	0.722819	0.288797	0.740116	0.221587	0.508512	0.141486	0.0154386	0	0.0362491	0.174622	0.104235	0.214114
E9PG40;P05067;P05067-11;P05067-7;P05067-8;P05067-9	0	0	0	0	0.237198	0.85976	1	0.922181	0.764972	0.815256	0.424874	0.346026	0.262495	0.2098
E9PG71;P54764;P54764-2	0	0	0	0	0	0	0	0	0.307678	0	0	0	1	0.770537
E9PG73;Q13427	0.134219	0	0.0863232	0.0594716	0.0778612	0.1106	0.116741	0.152648	0.199023	0.178497	0.155468	0.270718	0.324473	1
E9PGC0;P20936;P20936-2;P20936-4	0.482762	1	0.523213	0.450678	0.384621	0.213169	0.150351	0.26934	0	0	0	0	0	0
E9PGM7;O94988;O94988-1;O94988-3;O94988-5;O94988-6	0.588606	1	0.209542	0.270659	0.272135	0.219733	0.697612	0.210448	0.225765	0.106406	0.0940736	0.0014283	0	0.0255013
E9PGQ0;Q96H78	0	0	0	0	0	0	0	0.0400448	0.199178	0.229641	0.798625	1	0.373734	0.267858
E9PGT3;Q15418;Q15418-2;Q15418-4	0.691486	1	0.721084	0.490548	0.413764	0.193891	0.164157	0.0595658	0.041164	0.00907168	0	0.0169985	0.00766434	0.0748285
E9PGT6;Q99627	0.591613	1	0.659645	0.453014	0.451978	0.344189	0.60989	0.172644	0.0996187	0.0653484	0	0.00107728	0.0744227	0.142229
E9PHI4;O94901-9	0	0	0	0	0.0214788	0	0	0.0794079	0.137464	0.258149	0.154462	1	0.131264	0.685191
E9PHR9;Q9NRQ2;Q9NRQ2-2	0	0	0	0	0	1	0	0	0	0	0	0	0	0
E9PHT3;Q8IYS0;Q8IYS0-2	0	0	0	0	0	0.131412	0.26711	0.997893	0.521705	0.580172	0.43415	1	0.57925	0.287971
E9PHV5;P28290	0.317776	0.375839	0	0.0732247	0.0112325	0.184659	0.172445	0.337096	0.488021	0.597934	0.681992	0.663836	0.546963	1
E9PHX8;H7C3L9;Q12866	0	0	0	0	0	0	0	0.552389	1	0.366077	0	0	0	0
E9PHY5;O43491-4	0.266269	0.325002	0.0143277	0	0.0606196	0.0995239	0.202308	0.472705	0.905924	0.709073	0.770904	1	0.807174	0.736474
E9PHY8;Q8NDA8	0	0	0	1	0.76383	0.723651	0.469724	0.519357	0.340768	0.323622	0.374614	0	0	0
E9PI41	0.210205	0	0.295598	0.219224	0.328828	0.0628694	0.0498036	0.00805383	0.00502667	0.0504733	0.0498009	0.199004	0.0677097	1
E9PIC5;Q8N4M1-4;Q8N4M1-5;Q8N4M1-6	1	0	0.432275	0.35237	0.337284	0.314246	0.331171	0.310056	0.358383	0.397465	0.406368	0.592355	0.99549	0.895131
E9PIE3;Q969G5	0	0	0	0	0	0	0	0	1	0	0	0	0	0
E9PIF4;Q99519	0.30735	0	0.208342	0.233784	0.256503	0.527236	0.55668	0.907575	1	0.86603	0.662123	0.622838	0.592987	0.921632
E9PIG5;O00212	0	0	0	0	0.452332	0.0849026	0.266206	0.197456	0.509572	0.894973	0.281544	0.746708	0	1
E9PIH9;F8WA39;H0YDX3;Q13613;Q13613-2;Q8NEC6	0.483678	0	0	0	0	0.14127	0.454847	0.286543	1	0.441383	0.46902	0.402358	0.431343	0.944745
E9PIZ1	0.473961	1	0.172509	0.0914593	0.138659	0	0	0	0	0	0	0	0	0
E9PIZ2;H0YDB8;Q8N3Y3	0	0	0.19894	0.0704231	0.51474	0.096829	0	1	0	0	0	0	0	0
E9PJ20;E9PLF3;Q3MIX3	0	0	0	0	0	0	0	0	0	0	0	1	0	0
E9PJ55;Q9NUJ3	0.6954	1	0.91023	0.56316	0.494968	0.327569	0.185558	0.149495	0.127902	0	0	0	0	0
E9PJE4;Q9GZQ3	0	0	0	0.156141	0	1	0.882329	0.314206	0.471592	0.599726	0.150631	0	0	0
E9PJI1;Q92993;Q92993-2;Q92993-3;Q92993-4	0	0	0	0	0	0	0	0	0	0	0	0	0	1
E9PJJ5;E9PK99;E9PMS5;E9PRT1;Q4G0X4	0.733675	1	0.633703	0.601516	0.410817	0.299367	0.187019	0.175777	0.114225	0.0513803	0	0	0.0211864	0.101959
E9PJN9	0	0	0.381724	0.316685	0.480442	0.230101	0.229525	0.273208	0.498551	0.436311	0.990561	1	0.506493	0.149811
E9PJQ3;Q8N413;Q8N413-4	0	0	0	0	0	0	0	0.0114845	0.13617	0.24688	0.911474	1	0.414779	0.188028
E9PJW8;E9PQA6;Q96EY5;Q96EY5-2;Q96EY5-3	0	1	0.382638	0.217752	0.490682	0.322963	0	0.0764074	0.0855755	0	0	0	0	0
E9PK14	0	0	0	0	0	0	1	0	0	0	0	0	0	0
E9PK25;G3V1A4;P23528	0.798013	1	0.776827	0.557507	0.451117	0.317745	0.242105	0.194787	0.158964	0.101036	0.0245586	0.0394868	0.0589023	0
E9PK67;E9PNI7;Q53GL7	0.498274	1	0.467756	0.301992	0.262563	0.15728	0.117341	0.124759	0.0710568	0.0652866	0.063919	0	0	0
E9PK91;Q9NYF8;Q9NYF8-2;Q9NYF8-3	0.110236	0.164513	0	0.0344873	0.0431216	0.0585112	0.0862674	0.10298	0.147177	0.204572	0.306032	0.482655	0.665916	1
E9PKA8;E9PQL5;E9PSC8;Q6ZUT1;Q6ZUT1-2;Q6ZUT1-3	0	0	0	0	0	0.200141	0	0	0.33674	0	0	0	0	1
E9PKC0;Q6IQ23;Q6IQ23-2	0.0459994	0	0	0.0741947	0.0252853	0.0990138	0.180961	0.218757	0.491894	0.536276	0.608371	0.680582	0.496427	1
E9PKE9;G3V148;Q9H920;Q9H920-2
E9PKF6;H7BXH2;Q5H9R7;Q5H9R7-2;Q5H9R7-5;Q5H9R7-6	0.505398	1	0.466608	0.320181	0.315368	0.173237	0.219676	0.118927	0.0981191	0.0569385	0	0.00553619	0.0505803	0.0933143
E9PKG1;Q99873;Q99873-2;Q99873-3	0.614996	1	0.870706	0.752179	0.557697	0.435177	0.425348	0.362837	0.382345	0.313592	0.15295	0	0.140875	0.357647
E9PKN0;E9PQ01;O94913	0	0	0	0	0	0.257173	0.199006	0.436686	0.292035	0.367436	0	0.166038	0.700878	1
E9PKP7;P17480-2	0	0	0	0.107225	0	0	0	0.116072	0.0433846	0.0314794	0	0	0	1
E9PKP8;E9PS00;H0YCN1;H0YED5;Q9Y5Q0	0	0	0	0	0	0	1	0.680251	0.895252	0	0	0	0	0
E9PKS9;E9PQE8;Q9Y296;Q9Y296-2	0.934478	0.658348	0.82597	1	0.875551	0.790103	0.672165	0.363026	0.400685	0.254059	0.112527	0.247671	0	0.109561
E9PKT4;Q8N131;Q8N131-2	0.171051	0	0.0360466	0.225111	0.335039	1	0.467121	0.529295	0.214315	0.333354	0.369088	0.689313	0	0.171636
E9PKT9;O96033	0.726424	1	0.464016	0.225661	0.39118	0.208368	0	0.0559887	0.0543129	0	0	0	0	0
E9PKW7
E9PL17;Q92989;Q92989-2	0.507459	0	0.520694	0.775167	0.0767198	0.445405	0.240672	0	0.148744	0.0205843	0	0	0.271844	1
E9PL57	0.499691	1	0.292769	0.199575	0.165041	0.12762	0.0906931	0.0383647	0.020279	0.0234814	0.0106884	0.0129448	0	0.0161855
E9PLD0;Q9H0U4	0	0	0	0	0.249943	1	0.927604	0.538434	0.0758004	0.192349	0	0	0	0
E9PLI6;E9PNH5;E9PS76;Q8N9N8	0	0.93999	0	0	0.548837	0	1	0	0	0	0	0	0	0
E9PLK3;P55786	0.759647	1	0.589538	0.494283	0.345254	0.172808	0.0754326	0.0784111	0.0128908	0.00571716	0.00803207	0.0141611	0	0.0126254
E9PLN8;F8W9H0;I3L3B4;Q9BQB6;Q9BQB6-2;Q9BQB6-3	0	0	0	0	0.324161	0.224727	0.134526	0.904	1	0.849017	0.729012	0.849963	0.409718	0.20421
E9PLP8;Q12996	0	0	0	0.019177	0.0807497	0.172855	0.14058	0.137796	0.0862111	0.103259	0.161368	0.139253	0.243706	1
E9PLS0;E9PNU3;E9PPL0;E9PQC8;E9PR23;E9PRA4;Q71H61	0	0	0	0	0	0	0	0	0	0	0	0	0	1
E9PLY5	0.778909	1	0.419992	0.482971	0.393602	0.108886	0.0892419	0	0.0624676	0.00866	0	0	0	0
E9PM19;P29597	0	0	0	0	0	0	0	0	0.252541	1	0.39353	0.0800078	0	0.166497
E9PM62;Q5T9L3;Q5T9L3-2	0	0	0	0	0	0.259419	0.307415	0.323694	0.48096	0.395243	0.329585	0.672426	0.461808	1
E9PM75;Q9NTG7	0.0249825	0.0104219	0.0168696	0	0.035422	0.00487058	0.0262518	0.041574	0.0437702	0.133727	0.56907	1	0.542258	0.355399
E9PM90;Q9UK41;Q9UK41-2	0.879771	1	0.454675	0.4494	0.571089	0.266175	0.569982	0.341566	0.193826	0.286703	0.0751414	0	0.170559	0.212382
E9PMB9;Q16798	0	0	0	0	0	0	0	0	0.153117	0	0	1	0	0
E9PMG5	0	0	0	0	0	0	0	0	0	0	0	0	1	0
E9PMI6;J3KN38;P54105	0.525043	1	0.223266	0.284018	0.687803	0.431014	0.755879	0.383627	0.217738	0.0901422	0	0	0.0708584	0.182931
E9PMJ1;E9PS06;Q15771	0.602776	0	0	0	0.0422589	0.405217	0.395917	1	0.773572	0.677656	0.342472	0.569703	0	0
E9PMJ5	0.0184395	0	0.0655538	0.0527695	0.0587035	0.0585124	0.0482128	0.0824176	0.128277	0.182766	0.149511	1	0.713512	0.487506
E9PMQ6;Q00613;Q00613-2	1	0.916665	0	0.27351	0	0	0	0	0	0	0	0	0	0
E9PMR4;K4DIA7;P48509	0	0	0	0.158528	0.168414	0.203885	0.131443	0.471105	0.763851	0.886323	1	0.897659	0.225633	0.426051
E9PMS6	0.243965	0.22995	0.00392824	0	0.0531347	0.14154	0.168415	0.248652	0.570742	0.714392	0.764026	0.866029	0.641616	1
E9PN76;Q8ND24;Q8ND24-2	0.511482	1	0.48172	0.509692	0.343374	0.423744	0.55312	0.248896	0.418678	0.197754	0	0.314663	0.394513	0.216175
E9PN78;Q4KMG0;Q4KMG0-2	0	0	0.864951	0	1	0	0	0	0	0	0	0	0	0
E9PN89	0.601993	1	0	0.522157	0.341498	0.879626	0.874518	0.767968	0.143427	0.102944	0	0	0	0
E9PNE5;Q9H1C4	0	0	0	0	0	0.414671	1	0.281034	0	0	0	0	0	0
E9PNL8;Q13574;Q13574-1;Q13574-3;Q13574-4;Q13574-5;Q13574-6;Q13574-7	0.400984	0.607597	0.66448	0.58429	1	0.322651	0.7901	0.243286	0.669071	0.449284	0.161033	0.213778	0	0.602513
E9PNP3;E9PR47;Q9H7C9	0.564668	1	0.260658	0.2207	0.171839	0.125341	0.0804509	0.0454561	0.0403189	0.0239463	0.0164116	0.00634707	0.0029228	0
E9PPC1
E9PPF6	0.0920645	0	0	0	0	0	0	0	0.438283	0	0	0	1	0.136131
E9PPQ1;J3KNE7;Q16890;Q16890-5	1	0.890446	0.254054	0.182001	0.313714	0.247951	0.304684	0.268397	0.226462	0.245558	0.046034	0.0931518	0	0.0753297
E9PPZ9;O43292;O43292-2	0.820937	0	0	0.0430255	0	1	0.459604	0.278733	0.427787	0.411131	0.346703	0.264066	0.0755072	0.308348
E9PQ59;Q6P4R8;Q6P4R8-2;Q6P4R8-3	0	0	0	0	0	0	0	0	0	0	0	0	0	1
E9PQ73;Q8TDW7;Q8TDW7-1	0.620296	1	0.361629	0.366342	0.488706	0.307542	0.338738	0.120353	0.0907202	0.0530599	0.0217349	0.0122688	0.0387268	0
E9PQC9	0	0	0	0	0	0	0	0	0.952716	1	0.362266	0.452992	0	0
E9PQD7;P15880	0.00826234	0	0.196099	0.190751	0.178066	0.247366	0.201249	0.358645	0.49097	0.609811	0.729118	1	0.942507	0.477939
E9PQM8;E9PRF4;Q15047;Q15047-3	0.676586	1	0.180471	0	0.102828	0.437845	0	0.239531	0.186628	0	0	0	0	0.162163
E9PQY2;Q9NQP4	0.456915	1	0.288159	0.260557	0.275332	0.193601	0.0756753	0.0779961	0.0826712	0.0695541	0.0438964	0	0.0134537	0.0383077
E9PQZ2;Q11206;Q11206-2;Q11206-3;Q11206-4;Q11206-5;Q11206-6;Q11206-7	0	0	0	0	0	0.711485	1	0.241962	0	0	0	0	0	0
E9PR30;P62861	0.008164	0	0.131787	0.153777	0.149263	0.253876	0.222964	0.337249	0.590367	0.653904	0.702987	1	0.813976	0.504907
E9PR76;E9PSH4;Q9H063	0.41009	0	0	1	0.707431	0.316325	0.267964	0.106032	0.296112	0	0	0	0	0.376799
E9PR92	0	0	0	0	0	0	0.797622	0	0	0	0	0.858538	0	1
E9PRP3	0.0201551	0	0.02101	0.0199019	0.0571564	0.0491988	0.0928011	0.0553281	0.0863061	0.141354	0.463526	1	0.913639	0.478558
E9PRQ7;Q04323	0.533539	1	0.335757	0.303532	0.392544	0.274936	0.146199	0.106327	0.0809927	0.0411368	0.0280697	0.0114109	0.00787454	0
E9PRR7
E9PRU1;O95967	0.43307	1	0.823446	0.780658	0.455131	0.355987	0.255996	0.197415	0.140496	0.0872912	0.0373438	0.0744707	0	0.251722
E9PS41;Q6RFH5;Q6RFH5-2	0	0	0	0	0	0	0	0.138732	0.0501962	0	0.435996	0	0.12523	1
E9PS44;Q01628	0.39725	0	0.186494	0.241697	0.360666	0.844107	1	0.696984	0.466131	0.229592	0.357844	0.308926	0.237745	0.587902
E9PS74;Q8NBI5;Q8NBI5-2	0	0	0	0	0	0	0	0	0	1	0	0	0	0
E9PSA5;Q96Q83	0	0	0	0	0	0.0140424	1	0.0192428	0.0794274	0.0663109	0	0	0	0
E9PSH1
E9PSI1	0.547316	1	0.250842	0.243864	0.170226	0.270823	0.41853	0.123536	0.0941204	0.0684222	0.05962	0	0.177167	0.104665
ENSEMBL:ENSBTAP00000001528	0.0810204	0.491222	0	0	0.110093	0.362589	0.0994996	0.498195	1	0.975132	0.860352	0.32155	0.177381	0.54968
ENSEMBL:ENSBTAP00000007350	0.272123	0	0.790287	0.403586	1	0.496649	0.843009	0.830108	0.592794	0.181312	0.411039	0.132651	0	0.178321
ENSEMBL:ENSBTAP00000011227
ENSEMBL:ENSBTAP00000018229;Q3MHN5
ENSEMBL:ENSBTAP00000024146	0.0476332	0	0.419987	0.169937	0.231377	0.539714	0.316371	1	0.651908	0.427391	0.0783432	0.183562	0.172878	0.0216474
ENSEMBL:ENSBTAP00000024462;ENSEMBL:ENSBTAP00000024466	0	0	0	0	0.0499053	0	0	0	0.259869	0.280503	0.130134	0.370637	1	0.978178
ENSEMBL:ENSBTAP00000038329;REFSEQ:XP_001252647	0	0	0	0	0	0	0.541707	0.673845	1	0.4792	0	0.904154	0	0.286514
F2Z2D2;Q9NY99	0	1	0	0	0	0	0	0	0	0	0	0	0	0
F2Z2E2;Q86VI3
F2Z2H4;J3KPC0;Q5VVY4;Q86XD8	0	0	0	0	0	0.612786	0.94318	0	0	0	1	0	0	0
F2Z2J1;Q15349;Q15349-2;Q15349-3	0.742991	0.691677	0.612797	1	0.428767	0.725505	0.174979	0.380297	0.560681	0.0211749	0.495978	0	0.33731	0.38999
F2Z2U4;H0Y4W2;Q9Y4A5;Q9Y4A5-2	0.562075	0	0.409854	0.17085	0.362256	0.254975	0	0.0210482	0	0	0.123352	0.257969	0.027881	1
F2Z2W7;Q8IZ69;Q8IZ69-2	0.576723	1	0.67253	0.709412	0.602102	0.492879	0.242188	0.379463	0.421547	0.504539	0	0.676372	0	0
F2Z2X4;Q9C0E2	0.446607	0.900255	1	0.654201	0.538222	0.436161	0.382906	0.408791	0.34998	0.194741	0.351099	0.0863202	0.318364	0
F2Z2X9	0.0741634	0	0	0.0962494	0.32111	1	0.942171	0.762197	0.551916	0.510315	0.393178	0.366813	0.25041	0.379625
F2Z357;J3KPC5;P47736;P47736-4	0.575748	1	0.225598	0.328943	0.393524	0.130191	0.163004	0.0876945	0.026196	0.0185582	0.00406463	0	0	0
F2Z3K0	0	0.311524	0	0	0.29761	0.123297	1	0	0	0	0	0	0	0
F2Z3N3;Q68BL8	0.0964922	1	0	0.0613263	0	0	0	0.0313083	0.176203	0.442446	0	0	0	0
F5GWB9;I3L1L5;I3L2B9;I3L4D7;I3L4R7;I3L517;Q8NHS9;Q8NHS9-2;Q8NHS9-3	0	0	0	0	0	0	0	0	0	0	0	0	1	0.00522147
F5GWD9;F5H227;F5H3B3;F6R851;Q8WVL7	0	0	1	0	0	0	0	0	0	0	0	0	0	0
[truncated: 6,435 more rows]

## Sheet: E04_A_right
HFHF-fasted
Identifier	fasted_median_Fr.1	fasted_median_Fr.2	fasted_median_Fr.3	fasted_median_Fr.4	fasted_median_Fr.5	fasted_median_Fr.6	fasted_median_Fr.7	fasted_median_Fr.8	fasted_median_Fr.9	fasted_median_Fr.10	fasted_median_Fr.11	fasted_median_Fr.12	fasted_median_Fr.13	fasted_median_Fr.14
A0A024QZ33;K7EK40;K7EMD8;K7ERM9;Q9H0G5	1	0	0.470227	0.271062	0.596526	0.392348	0.179508	0.0775505	0	0.0778013	0	0	0	0
A0A024QZW4;Q9H1N7	0	0	0	0	0	1	0	0	0	0	0	0	0	0
A0A024QZX5;A0A087X1N8;A0A2R8YD12;P35237	0.435535	1	0.674341	0.3908	0.319112	0.200792	0.202838	0.159721	0.0890243	0.098155	0.0791193	0	0.0858174	0.0509925
A0A024R3B9;E9PJL7;E9PNH7;E9PRA8;P02511	0.145605	1	0.55773	0.7819	0.319871	0.955113	0.254545	0.471005	0.273215	0.0725614	0.149205	0	0	0
A0A024R3M2;A0A1B0GUD6;A0A1B0GWG7;A0A2R8Y5X2;J3KNL5;Q3KR37;Q3KR37-2;Q3KR37-3;Q3KR37-4	0	0	1	0	0	0	0	0	0	0	0	0	0	0
A0A024R4E5;Q00341	0.0377898	0	0.0339099	0.0633081	0.0701839	0.0823695	0.148615	0.192219	0.31764	0.365079	0.61371	0.987427	1	0.608269
A0A024R571;Q9H4M9	0.103529	0.142428	0	0.491072	0.514825	0.883686	0.795992	0.523083	0.83584	1	0.360852	0.480638	0.368105	0.275108
A0A024R5I4;O94956	0.447802	0	0	0	0	0.153116	0.403911	0.734511	1	0.868501	0.696393	0.617222	0.397482	0.840647
A0A024R6I7;P01009	0.349442	1	0.333039	0.249134	0.420687	0.519581	0.602603	0.268566	0.696049	0.370772	0.47257	0.564431	0.357071	0
A0A024R7E8;K7EMV4;K7EN05;K7EPC8;K7EQ44;P60002	0	0	0	0	0.489751	0.66268	1	0.575864	0.582082	0.255385	0	0	0	0
A0A024R7W5;A0A087WY31;A0A087X0Q1;Q7Z739	0.0336923	0.0293004	0.0191804	0	0.024159	0.0728416	0.0438868	0.168678	0.248298	0.117323	0.116205	1	0.890725	0.393546
A0A024RA52;P25787	0.364496	0.490773	1	0.707431	0.528888	0.435687	0.24047	0.177092	0.106905	0.107581	0.0457693	0.0118562	0.0213517	0
A0A024RAC6;Q14241	0	0	0	0.616453	0.849027	0.86424	0.194406	0.148118	0	0	0	0	0	1
A0A024RBG1;Q9NZJ9-2	0.692477	1	0.495186	0.391554	0.340807	0.243277	0.20442	0.134054	0.08924	0.114573	0.0357871	0.0176031	0	0
A0A024RCG2;Q96BI1	0.0927683	0	0.0655181	0.0733649	0.168208	0.322459	0.887115	1	0.765915	0.422413	0.350149	0.357748	0.339261	0.383386
A0A024RCN4;A0A087X2F1;B4DMT1;Q16670;Q16670-2
A0A024RCQ8;A0A0G2JH76;A0A0G2JHB6;A0A0G2JIU6;A0A0G2JK02;A0A0G2JKR3;A0A0G2JLA3;A0A0G2JLL3;A0A140T8X7;A0A140T9Y1;G8JLL2;Q9UMR5;Q9UMR5-2;Q9UMR5-3	0	0	0.138568	0.176272	0.196594	0.275334	0.651062	0.447741	0.519429	0.581752	0.854131	0.938229	0.760586	1
A0A024RCR6;A0A0G2JK23;P46379;P46379-2;P46379-3	0.477692	1	0.783431	0.481217	0.491066	0.259356	0.166432	0.0809415	0.0551898	0.0457227	0	0.0248653	0.0208689	0.104279
A0A044PY82	0.40086	0.212147	0	0.088177	0.0734883	0.106835	0.14	0.262585	0.699311	0.536546	1	0.620801	0.538253	0.937757
A0A067XG54;Q8NB49;Q8NB49-2;Q8NB49-3;Q8NB49-4	0.345298	0.0405961	0	0.0911422	0.157334	0.297903	0.507739	0.562525	0.763234	1	0.662752	0.466036	0.424612	0.749757
A0A075B6F9;Q9Y314	0.360099	0.499525	0.731804	0.54666	0.518392	1	0.551462	0.309649	0	0.384214	0	0	0	0
A0A075B6G3;A0A087WTU7;A0A087WV90;A0A5H1ZRP8;P11532;P11532-11;P11532-4	0.290664	0.0526705	0.046896	0.0277382	0	0.110694	0.143863	0.413485	0.887824	0.952746	0.870378	0.626716	0.72888	1
A0A075B6U9
A0A075B6W5	0	0	0	1	0	0.143601	0.338844	0.0863176	0.342126	0	0.358606	0	0.259715	0
A0A075B727;A0A075B728;P16284;P16284-2;P16284-3;P16284-4;P16284-5;P16284-6	0	0	0	0	1	0	0	0	0	0	0	0	0	0
A0A075B730;P58107	0.238645	0	0	0	0	0	0.685016	0	0.47176	0.859921	0.583447	0.392488	0.392353	1
A0A075B749;A0A087WX83;Q5VU43;Q5VU43-3;Q5VU43-4	0.440871	0.53221	0.988275	0.708547	1	0.397649	0.372089	0.34024	0.192715	0.545113	0	0	0.151262	0.464276
A0A075B754;Q96QE3;Q96QE3-2	1	0	0	0	0	0	0	0	0	0	0	0	0	0
A0A075B757;A0A075B762;A0A087WTQ0;A0A087WUR2;A0A087WVU4;A0A087WYI5;A0A087WZJ2;A0A087X002	0	0	0	0	0	0	0	0	1	0.730167	0	0	0	0
A0A075B773;K7ELY8;O00623	0	0	0	0	0	0	0	0.0643911	0.11577	0.291798	0.291253	1	0.335518	0
A0A075B784;E9PEW0;K7ELR5;Q8IXW9;Q9P275	0	0	0	0	0	0	0	0	0	0	0	0	0	1
A0A075B7B1;C9JIE4;O15061;O15061-2;O15061-3	1	0	0	0	0	0	0	0	0	0	0	0	0	0
A0A075B7B5;B7ZM87;O75044	0.325798	1	0.29387	0.244844	0.0529203	0	0.143325	0.367962	0.382674	0.460754	0.21753	0.312092	0.0427944	0.271497
A0A075B7F1;S4R3C0
A0A087WSV6;A0A087WSX8;A0A0B4J1W1;A0A0G2JLS4;A0A0G2JM99;A0A0G2JMY9;A0A0G2JNK9;A0A0G2JNM2;A0A0G2JNQ6;A0A0G2JNR3;A0A0G2JP64;A0A0G2JP80;A0A0G2JP96;A0A0G2JQ15;A0A0G2JQ44;A0A0G2JQ46;A8MVE2;D9IDM5;D9IDM6;F6RVM3;F6TER3;O75019;O75019-2;Q8N6C8;Q8N6C8-3;Q8NHL6;Q8NHL6-2;Q8NHL6-3;Q8NHL6-4;Q8NHL6-5	0	0	0	0	0	0	1	0	0	0	0	0	0	0
A0A087WSW7;A0A0B4J1V9;F6XU50;Q9NRZ9;Q9NRZ9-2;Q9NRZ9-3;Q9NRZ9-4;Q9NRZ9-5;Q9NRZ9-6	0	0	0	0	0	0	1	0.602921	0	0.277998	0	0	0	0
A0A087WSW9;A0A087WSY9;Q16881;Q16881-3;Q16881-4	0.560132	1	0.73323	0.496317	0.393401	0.272523	0.211104	0.14378	0.0949283	0.0917267	0.040296	0.00262806	0.0337362	0
A0A087WSY1;O15146;O15146-2;O15146-3;Q5T0B5
A0A087WSY5;Q96IY4	0.106128	0	0.00210232	0.182312	0.35822	0.778195	0.720982	1	0.974776	0.734033	0.54854	0.428153	0.342428	0.43019
A0A087WT18;Q96A73;Q96A73-2
A0A087WT20;Q9NV06	0	0	0	0	0	0	0	0	0	0.078541	0	0.0911184	0	1
A0A087WT23;A0A087WV67;O00124;O00124-3	0	0	0	0	0	0	0	1	0	0	0	0	0	0
A0A087WT30;J3KN91;Q8N5I9
A0A087WT34	1	0	0	0	0	0	0	0	0	0	0	0	0	0
A0A087WT44	0.0583177	0	0.0378585	0.0614172	0.145836	0.558821	1	0.863569	0.766448	0.712586	0.535475	0.82664	0.449472	0.399103
A0A087WT58;A6NES4
A0A087WT59;P02766	0.0608184	0	0.0102003	0.0638557	0.0700076	0.286516	0.591846	0.40228	0.559994	0.593763	0.595612	1	0.937444	0.642973
A0A087WT84;Q9H9V9;Q9H9V9-2	0	0.922151	0	0	0	0.225467	0	0	0	0.73615	1	0	0	0
A0A087WT87;P43003;P43003-2
A0A087WT91;A0A087WVF3;A0A087WXS9;A0A087X179;A0A087X1G2;A0A0G2JLM6;A0A0G2JMF6;A0A0G2JP35;A0A0G2JPY0;A6NDS4;A6NER0;B9A6J9;P0C7X1;Q6DHY5;Q6IPX1;Q8IZP1
A0A087WT95;P49753	0.207161	0.144304	0.0523316	0.0717996	0.0417434	0.00130144	0.00734105	0.00357315	0	0.0168674	0.154913	0.466214	0.429989	1
A0A087WTA5;E7ERK9;Q9UI10;Q9UI10-2;Q9UI10-3	0.0847916	0.383968	1	0.406519	0.346941	0	0.132513	0.148676	0.391856	0.490235	0.109281	0.388554	0.172837	0.16796
A0A087WTA8;P08123	0.0068262	0.000535234	0	0.00119447	0.00103031	0.00302633	0.00569899	0.0103671	0.0330568	0.0802815	0.0793898	0.234517	0.166852	1
A0A087WTF0;A2A3K4;A2A3K4-2	0	0	0	0	0	0	0	0	1	0	0	0	0	0
A0A087WTJ6;O14627;P47902;P47902-2;Q99626	0	0	0	1	0	0	0	0	0	0	0	0	0	0
A0A087WTK0;A0A087WVC6;Q12913	0	0	0	0	0.159322	0.266324	0.340481	0.259634	0.667471	0.896912	0.634048	0.819703	0.46287	1
A0A087WTM1;Q9Y6N7;Q9Y6N7-2;Q9Y6N7-3;Q9Y6N7-4;Q9Y6N7-5;Q9Y6N7-6	0.0387179	0.489745	0.00850843	0	0.135411	0.28789	0.329628	0.257565	1	0.982888	0.693425	0.701607	0.487881	0.85966
A0A087WTP3;Q92945	0.48903	0.76124	1	0.871107	0.690165	0.663272	0.365481	0.419884	0.168277	0.053364	0.16906	0	0.153239	0.765841
A0A087WTQ2;A0A3B3IT47;C9JGR9;E7EQ49;Q9Y2I8;Q9Y2I8-2;Q9Y2I8-3	0.458192	0	0.915542	0.621552	0.649095	0.271047	0.757052	0.797913	0.600346	0.190404	0.249438	0.309645	1	0.739237
A0A087WTS0;H0YJK8;P18283	0.658849	1	0.682842	0.493289	0.396181	0.374082	0.179938	0.146653	0.14777	0	0.0416215	0	0	0
A0A087WTT2;Q5JWB9;Q96A57;Q96A57-2	0	0	0	0	0	0.310345	1	0.973907	0.362654	0	0	0	0	0
A0A087WTU3;Q9Y6I9	0.226207	0	0	0.222041	0.284451	0.513866	1	0.909406	0.688535	0.660142	0.431639	0.547963	0.71906	0.412715
A0A087WTV6;A0A087WZR9;Q96C36	0	0	0	0	0	0	0	0	0	0	1	0	0	0
A0A087WTY4;P49454	0	0	0	0	0	0	0	0	0.0496006	0	0	0	0	1
A0A087WTY7;Q9H227	0.595426	1	0.526292	0.432708	0.380551	0.205018	0.162668	0.136233	0.0879755	0.088123	0.032586	0.0178988	0.00959337	0
A0A087WTZ8;E5RFJ1;E5RHW9;E5RIM1;Q96MF7	0	0	0	0	0	0	0.0802173	0.120861	0.195355	0.412083	0.737892	1	0.816662	0.403596
A0A087WU02;Q96RQ1	0.371789	0	0	0.29428	0.297555	0.793009	1	0.742659	0.651563	0.59812	0.683939	0.570874	0	0.417953
A0A087WU05;A0A087WY48;Q8IY22;Q8IY22-2;Q8IY22-3
A0A087WU07;Q5TGZ0;Q5TGZ0-2	0	0	0	0	0	0	0	0	0.0725953	0.233264	0.489089	1	0.95059	0.51609
A0A087WU25	0	0	0	0	0	0	0	0	0.0501624	0	0.459966	1	0.812894	0.494147
A0A087WU31;A0A0A0MTB7;E9PE15;P51790;P51790-2;P51790-4;P51790-5	0	0	0	0.211634	0.522357	0.43922	1	0.587469	0.660725	0.559748	0.353879	0.378256	0.188163	0.525777
A0A087WU37;A0A087WWG3;A0A087X140;A0A0A0MRU4;A0A0A6YYH9;C9J3G2;H0Y857;Q5JTY5;Q5JTY5-2;Q5RIA9;Q5RIA9-3;Q5RIB0;Q5RIB3;Q8IUF1;Q9BRT8;Q9BRT8-2;Q9BRT8-3	0.717006	0.913336	0	1	0.562246	0.664577	0	0	0.326098	0	0	0	0	0.603865
A0A087WU51
A0A087WU53;Q9H0U3	0.0981282	0	0.020789	0.0478846	0.0669174	0.230252	0.59167	0.689686	0.705062	0.58174	0.588266	1	0.825104	0.529255
A0A087WUB9;Q8WYA6;Q8WYA6-4	0.0764357	0.198191	0.195184	0.107075	0.116802	0	0.0947648	0.123009	0.0622758	0.142205	0.0455381	0.288479	0.637346	1
A0A087WUC6;E9PI68;Q15005	0.0622651	0	0.0111453	0.0292518	0.08824	0.151917	0.482206	0.455412	0.434578	0.505121	0.570921	1	0.789599	0.551577
A0A087WUD3;Q9NRP0;Q9NRP0-2	0	0	0	0	0.0390204	0.098013	0.203906	0.400562	0.499318	0.419835	0.608755	1	0.738	0.0768645
A0A087WUE2	1	0	0	0	0.338067	0	0	0	0	0	0	0	0	0
A0A087WUE4;A0A0G2JNN3;C9JMY0;Q96PV6;Q96PV6-1	0	0	0	0	0	0	0.131951	0	0	0.0141422	0	0	0	1
A0A087WUE6;A4PB68;Q3T8J9;Q3T8J9-2;Q3T8J9-3;Q9H869;Q9H869-2;Q9H869-3;Q9H869-4;Q9H869-5;Q9H869-6;Q9H869-7;Q9H869-8;Q9H869-9
A0A087WUI6;Q8WXW3	0	0	0	0	0.249427	0.220817	0.233078	0.502861	0.231781	1	0	0.706371	0.195088	0.0227811
A0A087WUJ1;Q9H400;Q9H400-2	0.122603	0.257169	0	0.0594477	0.235845	0.138484	0.10097	0.3208	0.34942	0.545574	0.272282	1	0.335686	0.285602
A0A087WUK2;O14979;O14979-2;O14979-3	0.0750773	0	0.077386	0.126124	0.150925	0.133038	0.182623	0.190457	0.216209	0.242861	0.33406	0.25514	0.316526	1
A0A087WUL2	0	0	1	0.153886	0.416518	0	0	0	0	0	0	0	0	0
A0A087WUL4;A0A087WX23;A0A087WZG9;B4DSP0	0	0	1	0.667616	0.796943	0.629993	0.557669	0.268693	0.296013	0.287962	0	0.393742	0.513207	0
A0A087WUM5;Q5VZR0;Q9H4G4	0.251318	0	0	0	0	0	0	0.467361	0.751759	0.588639	0.472088	0	0	1
A0A087WUQ6;P07203	0.670881	1	0.614263	0.361474	0.308366	0.275846	0.02998	0.0447453	0.0242405	0	0.284328	0.566977	0.797165	0.364158
A0A087WUT0;A0A0A0MR39	0	0	0	0	0	0.0998684	0.0710924	0.0711733	0.0877168	0.104795	0.0808085	0.181918	0.195866	1
A0A087WUT6;O60841	0	0.0910798	0.277357	0.795032	0.824332	0.579661	0.518004	0.440382	0.484937	0.570683	0.479162	0.759677	0.737135	1
A0A087WUU8;M0R3J2
A0A087WUV7;A0A3B3IS76;A0A3B3ISL9;A0A3B3ISM6;A0A3B3ISX6;A0A3B3ITJ2;A0A3B3IUC8;P10746;Q5T3L9	0	1	0.762443	0.492739	0.534053	0.425552	0.1922	0.247264	0.119647	0	0	0	0	0
A0A087WUW6;A0A087X0G7;A0A087X1B1;Q9Y6K9;Q9Y6K9-2;Q9Y6K9-3	1	0	0	0.729574	0	0	0	0	0	0	0	0	0	0
A0A087WUW9;Q9NXU5	1	0.505671	0.374713	0.362467	0.430432	0.461936	0.0764221	0.158941	0.264135	0	0.247108	0	0	0
A0A087WUZ7;Q9Y5W8;Q9Y5W8-2	0	0	0	0	0	0.0722222	0.801726	1	0.799095	0.809063	0.807613	0.810244	0.284657	0.400393
A0A087WV01	0.394124	0.44131	0	0	0	0	0	0	0	0.191545	0.572385	1	0.797205	0.958721
A0A087WV05;Q99417	0.607815	0.231184	0.829753	1	0.632577	0.945744	0.205085	0.18648	0.0547101	0.120758	0.13821	0	0.0475392	0.311818
A0A087WV24;P20711;P20711-3	0.685188	1	0.642704	0.347933	0.355536	0.210548	0.142776	0.121875	0.0790967	0.0576274	0.0510798	0	0	0.04515
A0A087WV25;O95684;O95684-2	0.451862	1	0	0.349583	0.354494	0.165563	0	0	0	0	0	0	0	0
A0A087WV39;Q92698;V9GYD3	0	1	0	0	0	0	0	0	0	0	0	0	0	0
A0A087WV61;G3V112;H0YBV2;Q8NE09;Q8NE09-3	0	0	0	1	0	0.675314	0	0	0	0	0	0	0	0
A0A087WV97;Q8WU79;Q8WU79-2;Q8WU79-3	0.745989	1	0.57612	0.513693	0.414103	0.422648	0.501265	0.34705	0.371038	0.342037	0.249416	0.135695	0	0.185138
A0A087WVA1;P62341	0.110137	0	0.0511584	0.0695754	0.12355	0.298789	0.846713	0.875266	0.581334	0.611297	0.460196	0.751567	1	0.41433
A0A087WVA8;Q8IWB9;Q8IWB9-2	0.106368	1	0.317981	0	0.0584485	0.205971	0.694792	0.452182	0.344345	0.103312	0.404296	0.295646	0.0654306	0.315658
A0A087WVC1;Q9BQ39	0	0	0	0	0	0	0.144722	0.131328	0.272804	0.228482	0.223585	0.230954	0.173129	1
A0A087WVE2;O00602
A0A087WVF1;K7EQH1;Q96B23;Q96B23-2	0	0	0	0	0	0	0	0	0	0	1	0	0	0
A0A087WVF7;Q9NZM3;Q9NZM3-2	0.326183	0	0.312638	0.296162	0.255498	0.409451	0.367142	0.544532	0.887006	0.743742	1	0.614604	0.507307	0.790885
A0A087WVI0;E9PBL8;Q8WTW3	0.67305	0.788344	1	0.914006	0.658709	0.370431	0.592371	0.346345	0.288026	0.433924	0.232249	0.378797	0.243451	0
A0A087WVM1;P78382;P78382-2;Q5W1L7	0	0	0	0	0.30471	1	0	0.293679	0	0	0	0	0	0
A0A087WVM4;B7ZM99	0.187917	0	0	0	0.0924398	0	0.234901	0.0665881	0.121356	0.121668	0.242587	1	0.50646	0.315311
A0A087WVP7;P0C024;P0C024-2	0.905303	0.842909	0.456423	0.381828	0.146601	0.181928	0.101065	0.0101837	0.154187	0.706644	0.806401	0.893139	1	0
A0A087WVQ6;Q00610;Q00610-2	0.163211	0	0.267105	0.428342	0.433376	0.568236	0.845849	0.619496	0.688637	1	0.478063	0.428541	0.4172	0.600379
A0A087WVS8;Q70IA6;Q70IA6-3	0.844421	1	0.591862	0.433735	0.779136	0.208777	0.160278	0.101464	0.135762	0	0	0	0	0
A0A087WVT6;A0A087X159;D6RAC5;P81877;P81877-2;P81877-3;P81877-4;P81877-5;Q9BWW4;Q9BWW4-2;Q9BWW4-3	0	0	0	0.91286	1	0	0	0	0	0	0	0	0	0
A0A087WVT8;A0A087X1L3;Q6ZWJ8	0	0	0	0	0	0	0	0	1	0.723448	0	0.464455	0	0
A0A087WVX4;P49895;P49895-2;P49895-4	0.587487	0	0.000708987	0.0464956	0.117453	0.374861	0.597828	1	0.846368	0.599408	0.377927	0.476773	0.308855	0.332221
A0A087WVX5;A0A1B0GTA9;A0A1B0GTF6;A0A1B0GTN8;A0A1B0GTP5;A0A1B0GTS4;A0A1B0GTX2;A0A1B0GU53;A0A1B0GUI8;A0A1B0GUK4;A0A1B0GVB2;A0A1B0GWF9;A0A1C7CYX2;A0A2R8Y555;A0A2U3TZM7;A0A494C0B2;A0A494C0Z9;A0A494C184;E7EN11;F8VNV8;F8VU10;F8VUW8;H0Y476;O00305;O00305-2;O00305-3;O00305-4;P54284;P54284-2;P54284-3;P54284-4;P54284-5;Q02641;Q02641-2;Q02641-3;Q08289;Q08289-10;Q08289-2;Q08289-3;Q08289-4;Q08289-5;Q08289-6;Q0…	0.186316	0.114697	0	0.188741	0	0.320096	1	0.408417	0.895077	0.580805	0.623764	0	0	0.716589
A0A087WVZ7;A0A087X068;Q9UJW7;Q9UJW7-2	0	0	0.154869	0.593085	0	0	0.42921	0.367737	0	1	0	0.872929	0.659668	0
A0A087WVZ9;A0A0A0MQR7;P19388	0	0	0	0.618112	0	0.484073	0.350699	0.657774	0.425724	0.594025	0	0	0	1
A0A087WW00;C9J9H9;P51668;Q9Y2X8	1	0.563141	0.676117	0	0.289042	0.184109	0	0	0	0	0	0	0	0
A0A087WW06;B0QYP5;Q96AY4	0	0	0	0.766123	1	0.127336	0	0.322295	0.339952	0	0	0	0	0.0558172
A0A087WW23;P20292	0	0	0	0	0	0	0	0	0.680444	0	0.305059	0	0	1
A0A087WW28	0	0.511599	0.641652	1	0.732573	0	0	0.358333	0	0	0	0	0	0
A0A087WW48;E7ET14;H0Y3N9;H0Y589;O75151;Q9UPP1;Q9UPP1-2;Q9UPP1-3;Q9UPP1-4;Q9UPP1-5
A0A087WW58;Q9C0D9	0	0	0	0	0	0.332498	1	0.856724	0.728363	0.61437	0	0.56563	0.394721	0
A0A087WW59;Q7Z7L8	0.278126	1	0.603057	0.984115	0.677699	0.755934	0	0	0	0	0	0	0	0
A0A087WW66;Q99460;Q99460-2	0.245793	0.362103	1	0.800294	0.536051	0.329642	0.304913	0.172796	0.0915831	0.154167	0.0381876	0	0.0297415	0.0480308
A0A087WW76;A0A1B0GTZ9;A0A1B0GV73;A0A452Q6Z5;H0Y468;Q5T5U3
A0A087WW77;Q15334	0	0	1	0.677832	0.864048	0.0902898	0.680816	0.699515	0.61202	0.600374	0.360696	0.648714	0.370363	0.390551
A0A087WWA3;O60333;O60333-2;O60333-4;Q4R9M9	0.4602	1	0.919729	0.650875	0.657689	0.333962	0.390209	0.340851	0.241221	0.198376	0.246422	0	0.290489	0.126088
A0A087WWA7;O14640;O14640-2;P54792;P54792-2	0	0	0	0.205364	0.964019	1	0.151847	0.632066	0.664507	0.130499	0	0	0	0
A0A087WWF6;F8W8R3;P49005	0	1	0.436056	0.471176	0.69606	0.447799	0.395133	0.439888	0.693338	0.795757	0.545573	0.276211	0	0.546573
A0A087WWG5	0	0	0	0	0.123254	0.112757	0.92705	0.708862	0.619625	1	0.116783	0.364534	0.184518	0.289536
A0A087WWH3;Q9NZM4;Q9NZM4-2	0	0	0	0	0	0	0	0	0	0	0	0	0	1
A0A087WWI0	0.502092	1	0.623538	0.480665	0.763552	0.399269	0.362723	0.299726	0.249022	0.123752	0.183206	0	0	0.100248
A0A087WWM0;O43617	0.927862	0.555077	0.943807	0.756845	1	0.741072	0.371847	0.351393	0.184687	0.142702	0.114399	0.0329224	0.0902863	0
A0A087WWM4;H0YNJ6;Q9P2T1;Q9P2T1-2	0.558252	1	0.916893	0.540923	0.490634	0.34745	0.319101	0.142407	0.105968	0.101127	0.0715879	0.047272	0.033505	0
A0A087WWM6;E7EQL6;O43272;O43272-1;O43272-2	0	0	0	0	0	0.246172	0	0.0856528	0.218751	0.305593	0.76755	1	0.551055	0.326934
A0A087WWP4;A0A494C001;A0A499FJY3;Q96T37;Q96T37-2;Q96T37-3;Q96T37-4	0.119039	0	0.245619	0.0109214	0.0189308	0.0681071	0.106924	0.0996339	0.166968	0.207966	0.279967	0.314085	0.390818	1
A0A087WWP5;Q12962
A0A087WWP8;A0A0C4DGT8;A0A0C4DH79;Q5VWQ0;Q5VWQ0-4	0	0	0	0	0.0296375	0.0370062	0	0.0549273	0	0.169279	0	1	0	0.227892
A0A087WWQ2;Q92979;V9GYP5	0	0	0	0	0	0	0	0	0.0887961	0	0	0	0	1
A0A087WWR2;H3BQI4;H3BQS2;I3L2Z5;P56270;P56270-2;P56270-3;P56270-4	0	0.511151	0	0	0	0	1	0	0.885096	0	0	0	0.540106	0.537649
A0A087WWS1;Q96FV9	0.259762	0	0	0	0	0	0.212671	0	0.183239	0.332341	0	0.440494	0.407505	1
A0A087WWT7;A0A1W2PRP3;Q7Z7M1	0	0	0	0	0	1	0	0	0	0	0	0	0	0
A0A087WWU8	0.226008	0.481799	0.33892	0.313959	0.324854	0.203148	0.0158803	0.126374	0.32064	0.105749	0.549769	0.571181	1	0
A0A087WWW9;O95999	1	0.811701	0.864914	0.601835	0.666919	0.466228	0.234326	0.325275	0.320048	0	0	0	0	0
A0A087WWY0;P08519	0.63793	0	0	0	0.338375	0.336893	0.529955	1	0.858345	0.484399	0.615462	0.627958	0.751421	0.485938
A0A087WX02;F8WB74;M0QYX1;P63302	1	0.804757	0	0	0	0	0	0	0	0	0	0	0	0
A0A087WX10;G3V4M2;G3V5E8;P54803	0	0	0	0	0	0	0.548669	1	0.465851	0.456607	0.469315	0	0	0.313311
A0A087WX11;J3KNG8;Q8TF40;Q8TF40-3	0.489812	0.304216	1	0	0	0	0	0	0	0	0	0	0	0
A0A087WX19;A0A087WX45;C9J5R6	0	0	0	0.0396882	0.0699686	0.0792083	0.131917	0.105996	0.121014	0.243086	0.383339	1	0.849436	0.615248
A0A087WX22;H3BVG2;Q2M296-3;Q2M296-4	0	0	0	0	0	0	1	0	0	0	0	0	0	0
A0A087WX80;A0A087WYF1;P24043	0.0964596	0.0048247	0.0355911	0.0469984	0	0.0017807	0.0415255	0.0571718	0.189722	0.334705	0.397769	0.739676	0.327559	1
A0A087WX97;Q9BXK5	0.582012	0.715626	0.209478	0.303189	0.656978	0.11556	0	0.0107979	0.130302	0.0160413	0.556769	0.808083	1	0.386844
A0A087WX99;A0A0G2JRA4;P55283;P55283-2	0	0	0	0	0	0	0	0	0	0	0	0	0	1
A0A087WXB0;O15126	0.427221	0	0.304193	0.765198	0.642958	0.706979	1	0.703567	0.633347	0.798998	0.466448	0.725142	0.287463	0.828945
A0A087WXC5;E7ESZ7;O95299	0.0835684	0	0	0.0381986	0.0405046	0.0633899	0.125072	0.16387	0.22575	0.28549	0.483251	1	0.587346	0.62495
A0A087WXD1;Q96T83	0	0	0	0.0674524	0.471404	0.680269	1	0.79634	0.7128	0.589864	0.481928	0	0	0
A0A087WXF8;A0A087WYV3;A0A0D9SEW3;Q9NP64;Q9NP64-2;Q9NP64-3	0	0	0	0	0	0	0	0	1	0	0	0	0	0
A0A087WXI2;Q9Y6R7	0	0	0	0	0	0	0	0	0	0	0	0	0	1
A0A087WXI5;P12830;P12830-2	0.158312	0.0134378	0	0.0153376	0.0126612	0.00221523	0.048539	0.140081	0.328106	0.541347	0.697052	0.807706	0.508393	1
A0A087WXL0;A0A087X1G7;A0A0J9YX89;A0A3B3IT39;A8MZD0;O60613;O60613-2	0	0	0	0	0	0.209835	0.58834	1	0.861375	0.397777	0.379384	0.21749	0.29736	0
A0A087WXL6;B7Z879;Q9H270	0.326211	0	0.123712	0.341162	0.362728	0.264691	0.901931	0.63509	0.584728	1	0.430282	0.386268	0.463318	0.312025
A0A087WXM6;A0A0A6YYL6;J3KRX5;J3QQT2;P18621;P18621-3	0.0664732	0	0.0876737	0.106328	0.209152	0.226995	0.291393	0.372471	0.63185	0.499953	0.573927	1	0.923353	0.755272
A0A087WXN9;Q765P7	0.506998	1	0.719694	0.928815	0.585607	0.486561	0.454553	0.398992	0.326944	0.273209	0	0	0	0
A0A087WXP0	0	0	0	1	0	0	0	0	0	0	0	0	0	0
A0A087WXS6;C9JBF1	1	0	0	0	0	0	0	0	0	0	0	0	0	0
A0A087WXU0;A0A2R8Y4J4;Q9NWS8;Q9NWS8-2	0.0624685	0	0	0.0061092	0.0162197	0.0365398	0.131746	0.144667	0.207999	0.301058	0.454066	1	0.748793	0.753008
A0A087WXV4;P41235;P41235-2;P41235-4;P41235-5;P41235-6	0	0	0	0	0	0	0	0	0	0.445596	0	0	0	1
A0A087WXW3;Q9Y3P8	0.183906	0	0.213845	0	0	0	0	0	0	0	1	0	0	0
A0A087WXW6;A0A140TA70;A0A140TA74;A9JR48;Q9BXA9;Q9BXA9-2;Q9BXA9-3;Q9BXA9-4	0.494661	1	0	0.887696	0	0.286828	0	0.377696	0.039071	0.0378703	0	0	0.38045	0.237008
A0A087WXX8	0	0	0	0	0	0	0	0	0.539338	0.199619	0.585595	0.618144	1	0
A0A087WY00;F8W6H6;F8WE88;G3V394;Q9Y4I1;Q9Y4I1-2;Q9Y4I1-3
A0A087WY55;Q9NP79	0.684769	1	0.63552	0.447702	0.392023	0.227271	0.178108	0.183778	0.107686	0.0956885	0.00859291	0	0.0314781	0.0290572
A0A087WY67;P0CG29;P0CG30;Q6ICJ4	0.712348	1	0.552827	0.328487	0.257252	0.169656	0.10577	0.0754736	0.0218665	0	0	0	0	0
A0A087WY71;Q96CW1;Q96CW1-2	0.22626	0	0.0301748	0.0108644	0.0206914	0.0417654	0.259925	0.385648	0.668507	1	0.791956	0.553455	0.541297	0.664873
A0A087WY85;A0A0A0MQU3;D6RAH7;D6RFM0;H9KV45;P61077;P61077-2;P61077-3;P62837;P62837-2	0.622429	0.948561	0.862613	0.627338	1	0.565521	0.364741	0.451949	0.278474	0.200434	0.0723365	0.103258	0.121865	0
A0A087WYA1;Q9UKN7	0	0	0	0	0	0	0	0	0	0	0	0.555717	0	1
A0A087WYD6;A0A0G2JLV0;Q03519;X5CMH5	0	0	0	0	0.0982032	0.151754	0.983408	1	0.736161	0.72913	0.386455	0.246061	0.86414	0.304519
A0A087WYF2;F5H2F2;P54687;P54687-2;P54687-3;P54687-4;P54687-5	0	0	0	0	0	0	1	0	0.179762	0.80946	0	0	0	0
A0A087WYF7;Q6UXV4	0.0451434	0	0	0.0210728	0.038812	0.0447513	0.107645	0.120192	0.150819	0.309517	0.401916	0.583228	0.835706	1
A0A087WYJ2;M0QZR8;M0R2B7;P28340	0	0	0	0.881221	0	0	0	0.45468	1	0.543951	0.592198	0	0	0.546061
A0A087WYL3;Q17R60
A0A087WYL6;A0A087WZG6;A0A087X1S9;Q8TEW8;Q8TEW8-2;Q8TEW8-3;Q8TEW8-5;Q8TEW8-6;R4GN62
A0A087WYM3;A0A0A0MRF5;E7EWX6;Q8IXJ6;Q8IXJ6-2;Q8IXJ6-3;Q8IXJ6-4	1	0.82303	0.472495	0.594367	0.622538	0.382002	0.521496	0.467889	0.382317	0.950277	0.458758	0	0.977898	0.258213
A0A087WYN9;Q7Z478	0.120477	0	0	0	0.106191	0.229627	0.420916	0.552049	0.62744	0.854795	0.862575	0.947194	1	0.754731
A0A087WYP2;Q8IZQ5	1	0.773111	0.199396	0.556334	0.47154	0.302499	0.257719	0.196914	0	0.0574898	0.167051	0.419359	0.215923	0.475026
A0A087WYR0;P09132	0.113028	0	0	0.132018	0.482498	0.59133	0.537097	1	0.688272	0.803151	0.648395	0.613501	0.846777	0.227484
A0A087WYS3;Q9ULU4;Q9ULU4-10;Q9ULU4-11;Q9ULU4-12;Q9ULU4-13;Q9ULU4-19;Q9ULU4-22;Q9ULU4-7;Q9ULU4-8;Q9ULU4-9	0.657514	1	0.487703	0.683355	0.155777	0.0664063	0.0457647	0.0196781	0.0419621	0.0363027	0.055857	0	0	0.109761
A0A087WYT3;Q15185;Q15185-4	1	0.625879	0.882552	0.75462	0.725313	0.652769	0.491674	0.320951	0.258323	0.185341	0.151472	0.105855	0.145847	0
A0A087WYV9;A0A087X1F5;P57105	0.0565398	0	0.0541138	0.0590726	0.0731553	0.0715375	0.10893	0.0952472	0.194294	0.309228	0.735619	0.982519	1	0.550744
A0A087WYX8;A0A1W2PQW0;A0A590UJL7;A0A5F9ZH12;A0A5F9ZHT2;A0A6Q8PH73;Q14CM0	0	0	0	0	0	0	0	0	0	0	0	1	0	0.482718
A0A087WYY0;A0A087X260;B1AKP7;G3V162;Q13148	0.0369543	0	0.0214397	0.109678	0.158967	0.154914	0.230583	0.195623	0.179986	0.195929	0.132623	0.232985	0.465527	1
A0A087WZ13;E9PAU2;Q8IY67;Q8IY67-2	1	0.534971	0.433952	0.464282	0.570663	0.238322	0.252379	0.150879	0.16325	0.147791	0	0	0	0
A0A087WZ32;A8K727;Q9HB19	0.650473	1	0.271902	0	0.353565	0	0.100891	0	0.03645	0	0	0	0	0
A0A087WZ40;Q14244;Q14244-6;Q14244-7	0.457926	1	0.76711	0.589557	0.744798	0.555641	0.287992	0.233716	0.240833	0.151197	0.139163	0	0.151929	0.000680792
A0A087WZ62;Q9H6U8;Q9H6U8-3	0.0633326	0	0	0	0.101642	0.291288	0.651445	0.95336	0.899231	0.651704	0.722207	1	0.804986	0.481439
A0A087WZ97;A0A087WZK6;A0A087X2C2;Q5T7M9	0	0	0	0	0	1	0.964863	0	0.201131	0	0	0	0	0
A0A087WZB5	0.23832	0	0.0577318	0.159964	0.274963	0.373039	0.179386	0.441409	0.855517	0.824107	0.875841	0.746309	0.793147	1
A0A087WZC1;Q6IN84;Q6IN84-2	0	0	0	0	0	0	0	0	0	0	0	0.908821	0.48	1
A0A087WZC2;A0A0C4DGS8;E0YMJ8;P35680;P35680-2;P35680-3;P35680-4	0	0	0	0	0	0	0.22593	0	0.241596	0	0	0	0.332359	1
A0A087WZE9	0	0	0	0	0	0	0	0	0	0	0	0	0	1
A0A087WZG4;A0A3B3IPE9;A0A590UK10;Q6ZSZ5;Q6ZSZ5-1;Q6ZSZ5-2;Q6ZSZ5-5;Q6ZSZ5-6	0.901322	1	0.932288	0.636833	0.692275	0.359682	0.426938	0.450409	0.228402	0.336073	0.484234	0	0	0
A0A087WZJ5	0	0	0	0	0	0	0	0	0	0	0	0	1	0
A0A087WZK0;M0R1T4;P49366;P49366-2;P49366-3
A0A087WZK9;B3KS98;O15372	0	0.017464	1	0.90694	0.855742	0.929387	0.879081	0.802209	0.729706	0.681011	0.650307	0.660791	0.535713	0.583725
A0A087WZM2;D6REQ6;D6RHI9;O00584	0	0	0	0	0.101752	0.308973	0.355593	0.37875	0.463209	0.407061	0.511686	0.785826	1	0
A0A087WZM8;Q8TBM7;Q8TBM7-2;Q8TBM7-3	0	0	0	0	0	0.332551	0.376375	1	0.809191	0.239385	0	0	0	0
A0A087WZN1;O43837	0.0379067	0.110597	0.0588343	0.0347695	0.0131053	0.0115091	0	0.0228397	0.0481276	0.133522	0.37508	0.766316	1	0.47869
A0A087WZP9	0	0	0	0	0.235867	0.36491	0.388143	0.873799	0.452889	0.242608	0.560802	0.223274	0.422998	1
A0A087WZQ7;Q9H115	0	0	0	0	0.386506	0.733599	1	0.439239	0.58113	0.446957	0	0	0	0
A0A087WZT0;M0QY61;M0QZ22;M0R0X3;Q5PRF9	0	0	0.36942	0.620683	1	0.836508	0.52455	0.662284	0.507014	0.565834	0.450412	0.200125	0.301933	0
A0A087WZT2;Q6UX53	1	0	0.00247413	0.00196226	0.079082	0.140216	0.413305	0.968917	0.5057	0.473133	0.220112	0.257848	0.159794	0.0833393
A0A087WZT3;Q9H3K6	1	0.814773	0.920214	0.824651	0.55717	0.64272	0.374471	0.492022	0.373977	0.278345	0	0	0	0
A0A087WZU2;E5RGN0;Q00536;Q00536-2;Q00536-3	0.951898	1	0.711979	0.389723	0.468337	0.328699	0.388426	0.220583	0.0954939	0.238563	0.11614	0	0	0
A0A087WZU5;O43657	0	0	0.507756	0.541722	0.992466	1	0.86053	0.957294	0.977864	0.797387	0.475386	0.431615	0.460747	0.0821958
A0A087WZV0;O43314	0.370274	1	0.582188	0.809963	0.465711	0	0.35083	0.0805729	0.185859	0.043321	0.434382	0.0712504	0.182686	0.129035
A0A087WZY2;A6NIV2;Q9P0U1
A0A087WZY5;A8MXH5;F5H3Q5;F5H851;Q14031;Q14031-2	0	0	0	0	0	0	0.527558	0.336448	0.318467	1	0.750567	0.979791	0.693085	0.00910622
A0A087X011;E9PES4;J3KPF9;Q9Y496	0.812862	1	0.875249	0.54388	0.67167	0.42814	0.440218	0.336053	0.784733	0.952563	0.439291	0	0	0
A0A087X020;Q9Y3A5	0.120327	0.218393	0.664141	0.503715	0.939837	0.759336	0.904125	1	0.739239	0.545146	0.630584	0.0926412	0.367923	0
A0A087X080;A0A0U1RRH1;A0A0X1KG73;Q15413;Q15413-2;Q15413-3	0	0.680281	1	0.374505	0.589437	0.526161	0.615193	0	0	0	0	0	0	0
A0A087X091	0.313377	0.639687	1	0.976278	0.682606	0.632625	0.249969	0.353615	0	0	0	0	0	0
A0A087X0D5;P09668	0.148942	0	0.170964	0.0173205	0.0542259	0.631785	0.882799	0.926634	1	0.709361	0.57575	0.564434	0.466943	0.92928
A0A087X0F1;Q9UK61;Q9UK61-2;Q9UK61-3;Q9UK61-4	0	0	0	0	0	0	0	0	0	0	0	0	0	1
A0A087X0H5;P10912;P10912-4	0	0	0	0	0	0	0.150809	0.51283	1	0	0	0	0	0
A0A087X0H8;Q15714;Q15714-2;Q15714-3	0.261222	0.696809	1	0.387895	0	0.0601292	0	0	0	0	0	0	0	0
A0A087X0H9;Q5T8P6	0	0	0.0867604	0.188918	0.246125	0.192529	0.17477	0.133042	0.155493	0.185387	0.277067	0.3494	0.402505	1
A0A087X0K0;P39059	0	0	0	0	0	0	0.937171	0	0	0	1	0	0	0
A0A087X0K4;Q7Z408;Q7Z408-2;Q7Z408-4
A0A087X0K9	0.281686	0	0	0	0	0	0	0.348691	0.694132	0.437299	0.503767	0.261833	0.333353	1
A0A087X0L7;E7EVY0;J3KNA0;Q15070;Q15070-2	0.0522568	0	0	0	0	0	0.0743296	0.120819	0.144747	0.246066	0.357267	1	0.699972	0.679638
A0A087X0M4;Q9BWU0	0.612813	1	0.853076	0.918684	0.494767	0.48543	0.451414	0.369097	0.21398	0.104633	0.0815424	0	0.0063449	0.284241
A0A087X0N2;A0A3B3ISI6;O15243	0	0	0	0	0	0	0	1	0.732017	0	0	0	0	0
A0A087X0P0	0	0	0	0	0	0	0	0	0	0	0	0	0	1
A0A087X0Q9;Q9BVL4	0.702289	1	0.763583	0.383498	0.281094	0.13343	0.0831244	0.0764375	0	0.05299	0.121077	0.434571	0.502965	0.250641
A0A087X0R6;Q9UMY4;Q9UMY4-1	0.71175	1	0.503883	0.43608	0.270699	0.22754	0.123005	0.0688531	0.0334997	0.0740481	0.068454	0.0723847	0.0616967	0
A0A087X0R7;Q9H4L4	0	0	0	0	0	0	0	0	0	0	0	0	0	1
A0A087X0R9;B8ZZK1;Q07837;Q07837-2;Q07837-5;Q07837-6;Q07837-7	0	0	0	0	0	0	0.957567	0	1	0.777427	0	0	0	0
A0A087X0S5;P12109	0.00607873	1	0.547545	0.414495	0.123121	0.0297172	0.112844	0	0.0454569	0.00576655	0.143265	0.410941	0.181553	0.622117
A0A087X0T5;Q96AB6	1	0	0	0.893274	0	0	0	0	0	0	0	0	0	0
A0A087X0V5;P29728;P29728-2	0.65074	0.53574	0.0482218	0.0561489	0	0.130862	0.706703	0.698221	0.870123	0.93454	0.584792	0.561529	0.666979	1
A0A087X0W8;Q04206;Q04206-2;Q04206-3;Q04206-4;Q2TAM5	0.74764	1	0.700884	0.714988	0.353585	0.270439	0.267999	0.180383	0.175932	0.169459	0.114026	0.13802	0.0344073	0
A0A087X0W9;Q8N6M0	0.280088	0.809718	0.859583	1	0.66515	0.566146	0.284471	0.366187	0.2935	0.199876	0.0943553	0.0169878	0.0409824	0
A0A087X0X3;P52272;P52272-2	0.0420935	0	0.0104586	0.02437	0.050799	0.057395	0.108655	0.131204	0.112882	0.154874	0.166472	0.21531	0.250262	1
A0A087X0Y2;A0A087X248;A0A087X2I9;A0A096LPD8;F5GWV3;F5H3N7;F5H8B4;O14607;O14607-2;O14607-3;O14607-4;O14607-5	0	0	0	0	0	0	0	0	0	1	0	0	0	0
A0A087X108	0.728655	1	0.753834	0.474859	0.394416	0.255122	0.208896	0.232649	0.137006	0.11061	0.0338883	0	0.016964	0.00983764
A0A087X117;A0A0G2JN29;Q15155	0	0	0	0	0	0	0	0	0.395256	0.213781	0	0	1	0
A0A087X138;Q8TF71	0.297253	0	0	0	0	0	0	0.406785	1	0.631629	0	0	0	0
A0A087X1A8;A0A2R8Y3X7;D3VVH9;F5H211;G3V3R7;P54252;P54252-1;P54252-4	0.581482	1	0.573999	0.438403	0.479131	0.201163	0.130229	0.101837	0.0719759	0.138607	0	0	0	0
A0A087X1B2	0.110456	0.0809825	0.00853013	0.134491	0.103458	0	0.208779	0.117464	0.200036	0.170272	0.161738	0.263603	0.27227	1
A0A087X1B6;E9PEG3;F5GZG9;P10275;P10275-3;P10275-4	0	0.504199	1	0	0	0	0	0	0	0	0	0	0	0
A0A087X1E4;P53365;P53365-3	0.278473	0.125616	0.14313	1	0.320318	0.240482	0.108332	0.0383669	0.022648	0.0432443	0.00232869	0	0.0255203	0.0198576
A0A087X1G1;H7BYD0;Q16718;Q16718-2	0.0516997	0	0.0113553	0.0108872	0.00889735	0.0322865	0.0664431	0.0934182	0.157216	0.200253	0.608938	0.944967	1	0.640728
A0A087X1G4	0	0	0	0	0	0	0	1	0	0	0	0	0	0
A0A087X1J2	0	0	0	0	0	0	0	0	0	0	0.583328	0.750653	1	0.258438
A0A087X1J7;P22352	0.0737908	0.0761882	0.15077	0	0.0652131	0.231277	0.125789	0.0198119	0.164621	0.541068	0.824534	0.273397	0.491197	1
A0A087X1K1;Q96C00	0	0	0	0	0	0.120699	1	0	0.55051	0	0	0	0	0
A0A087X1N0;Q9H3C7	0	0	0	0	0	0	0	0	1	0.492491	0	0	0	0
A0A087X1N3;F8WC38;O75818;O75818-2	0	0	0	0	0.40239	0.293009	0.532021	0.372026	0.323934	0.78646	0	0.415919	1	0
A0A087X1N7;P20929;P20929-2;P20929-3;P20929-4
A0A087X1P3;C9IYE1;F8W8P5;H7BYR4;Q86UW7;Q86UW7-2;Q86UW7-3	0.239444	1	0.315993	0	0	0.30018	0	0	0	0	0	0	0	0
A0A087X1P5;J3KQ41;J3QT95;Q9H9Q2;Q9H9Q2-3	0.829676	1	0.737931	0.580853	0.886942	0.572107	0.248607	0.557063	0.390374	0.0852884	0.25216	0	0	0
A0A087X1R3;A0A0C4DGX0;A6QL64;Q8N2N9	0.495542	1	0.583368	0.686517	0.316784	0.0758438	0.40217	0.393816	0.278625	0.45127	0.252331	0	0	0
A0A087X1S3
A0A087X1T7;A0A5K1VW97;H0YMF1;P16112;P16112-2;P16112-3
A0A087X1U5;F5H7T0;F6RJM5;Q96S38;Q96S38-2	0	0	0	0.999803	1	0	0	0	0	0	0	0	0	0
A0A087X1W8;A0A0A0MTJ8;Q9BY67;Q9BY67-3;Q9BY67-4;Q9BY67-5;X5DQS5	0.458952	0	0.1624	0.134682	0.416976	0.156642	0.345277	0.402859	0.67628	0.686274	0.864596	1	0.985493	0.72599
A0A087X1Z1;A0A0G2JPW5;A0A0G2JQX1;A0A0G2JSA7;Q96RT8;Q96RT8-2
A0A087X1Z3;Q9UL46	0.561787	0.646946	1	0.696096	0.511698	0.330192	0.244533	0.165309	0.121579	0.124662	0.0548499	0.0422627	0.0589659	0
A0A087X241;Q2NKQ1;Q2NKQ1-3;Q2NKQ1-4	0	0	0	0	0	0	0	0	0	1	0	0	0	0
A0A087X256;Q2M389	0	0.0526172	0.135211	0.468021	0.619081	0.687569	0.929331	0.684179	0.491178	1	0.544221	0.617471	0.846059	0.88804
A0A087X266;Q9BXJ8	0	0	0	0.477024	0.229974	0.441784	1	0.909419	0.674839	0.493052	0.641512	0.711688	0.801175	0.55784
A0A087X279;P09913	0.663227	1	0.792919	0.533294	0.580092	0.528649	0.537158	0.31621	0.307937	0.337493	0.12468	0.392703	0	0
A0A087X283;A0A1B0GX65;B7Z306;C9J180;C9J2P0;H7C061;P51965;P51965-2;P51965-3;Q969T4;Q96LR5;R4GN77;R4GND1	0.529751	1	0.661526	0.61135	0.584928	0.31587	0.48577	0.435669	0.228297	0.292438	0	0	0.151341	0
A0A087X294;O75914;O75914-2;O75914-3;O75914-4	0.531398	1	0.586143	0.619634	0.475817	0.348663	0.205445	0.141155	0.109365	0.0852	0.0424593	0.0370373	0	0.025303
A0A087X295;E9PDU5;Q9NNW5	0.39827	0	1	0.494438	0.360439	0	0.213833	0.138935	0	0	0	0	0	0
A0A087X296;P23219;P23219-2;P23219-3;P23219-4;P23219-5;P23219-6	0.11121	0	0	0.0708029	0.0430489	0.0408969	0.208932	0.243959	0.448635	0.446695	0.556455	1	0.581076	0.967542
A0A087X2A7;H0YBA5;H7BY63;Q8NB25;Q8NB25-2;Q8NB25-3;Q8NB25-4
A0A087X2B2;E9PMH5;Q13490;Q13490-2	0	0	0.295376	0.43539	1	0.583852	0.438802	0.264549	0.720187	0.329849	0	0	0	0
A0A087X2B5;P35613;P35613-2	0.243198	0	0.0199359	0.0384241	0.0558997	0.230813	0.24863	0.523598	1	0.706356	0.914341	0.665082	0.370847	0.736258
A0A087X2B6
A0A087X2D5;Q9BRJ2	0.0352201	0	0.0191624	0.0349399	0.0353444	0.0870057	0.135043	0.0560262	0.110582	0.140492	0.449796	0.600587	0.535395	1
A0A087X2D8;O60271-2;O60271-4	0	0	0	0	0	1	0	0	0	0	0	0	0	0
A0A087X2G6;A0A0C4DGU5;D6RIC3;Q9Y3C1;Q9Y3C1-2;Q9Y3C1-3	0.155901	0	0.0086188	0.0255872	0.16143	0.260477	0.208917	0.196727	0.226234	0.7078	0.520107	0.516458	0.723968	1
A0A087X2I1;P62333	0.288164	0.557696	1	0.799322	0.846806	0.407987	0.25558	0.168485	0.103903	0.0799759	0.0386481	0.0549794	0	0.0160989
A0A088AWN3;A0A0A0MSY4;Q9BZ29;Q9BZ29-3;Q9BZ29-4;Q9BZ29-5	0	0	0	0.02464	0.0128854	0.0134869	0.0249246	0.0135232	0.0353591	0.0536835	0.303958	1	0.642196	0.243187
A0A088AWN8;E7EP87;E9PH27;J3KS48;J3KT43;J3QRB0;Q9UHQ1;Q9UHQ1-2;Q9UHQ1-3;Q9UHQ1-4	0	1	0.414436	0	0.493868	0	0	0	0	0	0	0	0	0
A0A088AWP2;A0A0C4DG41;A8MX39;A8MZ24;B5MDW0;P11308;P11308-1;P11308-2;P11308-3;P11308-5;P11308-6	0	0	1	0.907395	0.802942	0	0	0	0	0	0	0	0	0
A0A088AWP5;E9PDC2;H7BZH9;Q8WUY3;Q8WUY3-2;Q8WUY3-3;Q8WUY3-4	0	0	0	0	0	0	0	0	1	0	0	0	0	0
A0A090HNM7;A0A1W2PS85;P28715;R4GMW8	0.314	0.423617	0.496961	0.592917	0.465045	0.315558	0	0.0380703	0.147434	0.0978446	0.344661	0.29419	0.269114	1
A0A096LNH6;Q14185	0.269474	0.396075	0.5161	0.449583	0.477759	0	0.364871	0.40122	0.330918	0.487205	0.290283	0.640231	0.458518	1
A0A096LNV3;A0A096LP02;Q9Y508;Q9Y508-2	0	0.529189	1	0.797331	0.936825	0.85499	0.973109	0.718872	0.576251	0.454344	0.32917	0.365177	0.404736	0
A0A096LP22;A0A096LP34;C9J7Z1;Q86Y79	0	0	0	0	0	0	0	0	0	0	0.457642	1	0.617512	0.72532
A0A096LP69	0	0	0	0	0	0.674494	0	0	1	0	0	0	0	0
A0A096LPC5;A0A0A0MR88;Q9Y4E1;Q9Y4E1-1;Q9Y4E1-2;Q9Y4E1-6	0	0	0	0.326569	0.475791	1	0.312484	0.327946	0	0	0	0	0	0
A0A096LPE2	1	0.0657497	0	0.113366	0.153344	0.194414	0.365326	0.300063	0.347294	0.236304	0.176145	0.334985	0.204453	0.224295
A0A096LPI6	0.0867773	0.119414	0.0846545	0.0490363	0.0472901	0.0272092	0	0.00175902	0.0419752	0.0811588	0.504688	1	0.973004	0.461455
A0A096LPJ4;P05161	0.626351	1	0.54093	0.422059	0.295787	0.168474	0.146559	0	0.0495551	0.059838	0.0519202	0.274308	0.403748	0.0279747
A0A096LPJ9;A0A140G945;A0A140G945-2;E7EWH7;P02489	0	0	0	1	0.686598	0.602913	0	0	0	0	0	0	0	0
A0A0A0MQR2;Q9BY42	0.595885	1	0.429435	0.408657	0.749909	0.39586	0.297357	0.287751	0.174386	0	0.336409	0	0	0
A0A0A0MQR4;I3L2J0;Q96RK0	0.664502	1	0.796767	0.799346	0.507591	0.352807	0.262141	0.16746	0.336829	0	0.238802	0	0.794003	0.356936
A0A0A0MQS1;Q53H96;Q53H96-2	0.253516	1	0.503914	0.49439	0.47876	0.360995	0.364212	0.297717	0.122503	0.194008	0.0854195	0.159375	0	0.0850108
A0A0A0MQS9;A0A0A0MTC7;Q16363;Q16363-2	0	0	0	0	0	0	0	0	0.526686	0.840781	0	0	0	1
A0A0A0MQT0;P09455	0.678778	1	0.435526	0.424839	0.443148	0.219066	0.120752	0.0917523	0.0689804	0.0283221	0.027111	0.0320193	0.0417478	0
A0A0A0MQU0;Q9BV38;U3KQC1	0.0979176	0.0459481	0.0246872	0	0.0572461	0.00750115	0.0874273	0.00601277	0.0166205	0.14817	0.125516	0.230032	0.174915	1
A0A0A0MQU4;Q96I15	0.61519	1	0.617181	0.622504	0.466922	0.413424	0.17307	0.193765	0.103739	0.0825739	0.0326363	0	0.0328478	0.00353484
A0A0A0MQU7;A0A0A0MTK8;F5H0K0;P20823;P20823-2;P20823-3;P20823-7;U3KQS6	0	0.115764	0.0240741	0.188902	0.223998	0.093485	0.10128	0.0409454	0.0824649	0.180201	0.272428	0.276449	0.435235	1
A0A0A0MQV6;P09038;P09038-1;P09038-2;P09038-3
A0A0A0MQX1;D6RGD1;Q9HD67	0	0	0	0	0	0	0	0.562251	0.851589	1	0	0	0	0
A0A0A0MQX8;C9JP00;Q9NR56;Q9NR56-2;Q9NR56-5;Q9NR56-6;Q9NR56-7	0	0.162457	0.00734909	0.162191	0.206388	0.715429	0.323139	0.255558	0.23906	0.370046	0.612169	0.452013	1	0.718296
A0A0A0MQY7;A0A3B3ISH2;Q5VU97	0.406705	1	0.207702	0.433088	0.177476	0.0803532	0.232805	0.236586	0.372935	0.199637	0.168717	0	0	0
A0A0A0MQZ4;Q8N3J5;V9GY69	0	0	0	0	0	0	0	0	0	0	0	0.877086	1	0
A0A0A0MR02;P45880;P45880-1;P45880-2	0.0653779	0	0.0374514	0.0515739	0.0762315	0.0997758	0.147645	0.239194	0.340459	0.425919	0.591193	1	0.827342	0.604831
A0A0A0MR03;A0A0J9YWB6;A0A0J9YWJ4;K7EJD2;Q9Y5B0;Q9Y5B0-4	0.098476	1	0.312151	0.460606	0.473926	0.272377	0	0	0	0	0	0	0	0
A0A0A0MR05;H3BM50;H3BN58;H3BPT1;H3BPU5;Q9BVC4;Q9BVC4-4;Q9BVC4-5	0	0.100606	0.237065	0.599528	0.71274	1	0.765846	0.866926	0.832941	0.648401	0.583625	0.456837	0.25207	0
A0A0A0MR07;F5H5P4;P15498;P15498-2;Q96D37	0	0	0	0	1	0	0	0	0	0	0	0	0	0
A0A0A0MR09;P43378	1	0	0.09295	0.234129	0.337233	0.282463	0.518991	0.296997	0.240879	0.0591017	0.149675	0.25378	0.356334	0.90169
A0A0A0MR11;A0A0A0MRS1;Q06730;Q06730-2;Q06730-3	1	0	0	0	0	0.522791	0	0.404348	0	0	0	0	0	0
A0A0A0MR25;A0A5S6RJB7;D2CGD1;E7EVR7;H7BXU9;H7C265;P21802;P21802-15;P21802-16;P21802-17;P21802-18;P21802-2;P21802-20;P21802-21;P21802-22;P21802-23;P21802-3;P21802-4;P21802-5;P21802-6;P21802-8;S4R381
A0A0A0MR36;Q9ULV0-2	0	0	0	0	0	0.180825	0.531805	0.337221	0.7275	1	0.720625	0.899185	0.723741	0
A0A0A0MR51;H7C2V0;O60427	0	0	0	0	0	0	0.475155	0.279402	0.450553	1	0	0	0	0
A0A0A0MR67;A0A0A0MSA1;E9PDI6;F5GY28;F5H522;Q13936;Q13936-10;Q13936-11;Q13936-12;Q13936-13;Q13936-14;Q13936-15;Q13936-16;Q13936-17;Q13936-18;Q13936-19;Q13936-2;Q13936-20;Q13936-21;Q13936-22;Q13936-23;Q13936-24;Q13936-25;Q13936-26;Q13936-27;Q13936-28;Q13936-29;Q13936-3;Q13936-30;Q13936-31;Q13936-32;Q13936-33;Q13936-34;Q13936-35;Q13936-36;Q13936-37;Q13936-4;Q13936-5;Q13936-6;Q13936-7;Q13936-8;Q13936…	0	0	0	0.982765	1	0	0	0.227923	0.145663	0	0	0	0	0
A0A0A0MR74;O75907	0	0	0	0	0	0	0.232496	0.342513	0.362228	0.917973	0.195615	0.418563	1	0
A0A0A0MR93;A0A0C4DH11;K7ELZ7;K7ES91;Q53F39;Q53F39-2;Q53F39-3	0	0	0	0	0	0	1	0	0.507129	0	0	0	0	0
A0A0A0MRA5;B7Z4B8;M0R3F1;Q9BUJ2;Q9BUJ2-2;Q9BUJ2-4	0.352456	0.633285	0.646656	0.387426	0.308415	0.312099	0.0580407	0.0677612	0.0296109	0.0182947	0	0.00763731	0.0582806	1
A0A0A0MRA8;A8K968;Q9Y2J2;Q9Y2J2-2	0.34181	0.109988	0	0.00861302	0.0158518	0.062138	0.169911	0.333278	0.991699	0.895681	0.881185	0.755984	0.69007	1
A0A0A0MRB5;Q8WXG6;Q8WXG6-2;Q8WXG6-3;Q8WXG6-4;Q8WXG6-5;Q8WXG6-6;Q8WXG6-7;Q8WXG6-8	0.107357	0	0.176689	0.766212	1	0.443965	0	0	0	0	0	0	0	0
A0A0A0MRD0;A0A2R8YCE3;F5H4B4;F5H4B4-2	0	1	0	0	0	0.303419	0.221852	0.308676	0.760649	0	0	0.0588278	0	0
A0A0A0MRE5;Q9ULH1;Q9ULH1-2	0.231052	0.452934	0.224137	0.923743	0.478615	0	0.875661	0.269754	0.62358	0.60452	1	0.615698	0.515047	0.626384
A0A0A0MRF6;Q99996;Q99996-1;Q99996-3;Q99996-5;Q99996-6	0.270135	0.73245	1	0.757566	0.58091	0.233112	0.143294	0.0847603	0.0470362	0.196397	0.314296	0.164805	0	0.0495699
A0A0A0MRF9;P16885	0.659681	1	0.815871	0.588371	0.539366	0.36334	0.474176	0.244553	0.195496	0.234289	0.112667	0	0.0784163	0
A0A0A0MRG8;Q16611	0	0	0	0	0	0	0	0	0.289378	0.283347	0.767908	1	0.610923	0.226652
A0A0A0MRH3;Q9Y2W7;Q9Y2W7-2;Q9Y2W7-3	0.155545	0	0.199158	0.709518	0.412779	0.451208	0	0	0.417429	0	0	1	0	0
A0A0A0MRI1;Q8IXQ4	0.332064	1	0.557179	0.264935	0.229472	0.227785	0.116857	0	0.0315796	0.131515	0.0994136	0	0.167196	0.105138
A0A0A0MRI2;Q9UNH7	0.987735	1	0.731286	0.646782	0.896508	0.762083	0.482057	0.568447	0.411391	0.272797	0.0749047	0.0977309	0.134298	0
A0A0A0MRJ0;Q5VT25;Q5VT25-2;Q5VT25-3;Q5VT25-4;Q5VT25-5;Q5VT25-6
A0A0A0MRJ6	0.585815	1	0.622607	0.524617	0.486025	0.313938	0.0905273	0.147723	0.102201	0.0278425	0.0707503	0.0503369	0.0561043	0
A0A0A0MRJ7;P12259	0.281525	0.525475	0	0.139117	0.316504	0.434324	0.711458	1	0.753585	0.679129	0.38119	0.29689	0.399275	0.417677
A0A0A0MRM2;Q86VF7;Q86VF7-2;Q86VF7-3;Q86VF7-4	0	0	1	0	0	0	0	0	0	0	0	0	0	0
A0A0A0MRM9;Q14978;Q14978-2;Q14978-3	0.0585754	0.0666314	0.0227385	0.0194852	0.0211172	0.014637	0.00873394	0	0.033	0.0280022	0.0579812	0.165997	0.191572	1
A0A0A0MRP6;B7ZLQ5;P28370;P28370-2	0	0	0	0	0	0	0.0723301	0.276507	0.141167	0.262124	0	0.418861	0.304084	1
A0A0A0MRR1;Q5VV50;Q5VV51;Q5VV52;Q5VV52-3	0	0	0	0	0	0	0	0	0	0	0	0	0	1
A0A0A0MRR7;P09234	0.0339179	0	0.00504555	0.0294715	0.0571978	0.102022	0.0557989	0.0742584	0.0864503	0.125871	0.169969	0.197763	0.232687	1
A0A0A0MRS8;Q9P2E2;Q9P2E2-3
A0A0A0MRT2;Q9BTA9;Q9BTA9-2;Q9BTA9-5	0.138537	0	0	0.862164	0	1	0.677872	0.879245	0	0.730319	0.502745	0	0.73654	0
A0A0A0MRT6;Q8IZP0;Q8IZP0-2;Q8IZP0-3;Q8IZP0-4;Q8IZP0-5;Q8IZP0-6;Q8IZP0-9	0.00228767	0.328484	0.0328048	0.856252	0.333283	0.85323	0.966333	0.435072	1	0.737838	0.375509	0.661459	0.0501581	0
A0A0A0MRW6;Q9H6R4;Q9H6R4-2;Q9H6R4-4	0	0	0	0	0	0	0	0	0	0	0	0	0	1
A0A0A0MRX1;A0A0R4J2E6;A0A494C0F8;A0A494C147;A0A494C1D9;B1APY9;P26378;P26378-1;P26378-2;P26378-3;P26378-4;P26378-5;Q12926;Q12926-2
A0A0A0MRX8;A0A1B0GWI9;A0A1B0GWJ4;A0A2R8Y7V8;O00712;O00712-4;O00712-5;Q5VW26;Q5VW27;Q5VW30;U3KQE8	0.026687	0	0.0511418	0.206931	0.258238	0.060346	0.0917792	0.239917	0.213412	0.135715	0.187289	0.224802	0.183015	1
A0A0A0MRY0;B0QYI1;Q8WUA7;Q8WUA7-2;Q8WUA7-3;Q8WUA7-4	0.595812	1	0.840135	0.456497	0.664254	0.365091	0.31197	0.216991	0.141588	0.119366	0	0	0	0
A0A0A0MRZ1;Q9H9P5-1;Q9H9P5-3	0.46843	0.814242	0.509367	1	0	0.0255949	0.402014	0	0	0	0	0	0	0
A0A0A0MRZ4;E7EMV7;Q15025;Q15025-2;Q15025-3;Q15025-4;Q15025-5;Q15025-6;Q15025-7;Q15025-8	0.164457	1	0.920989	0.889422	0.724158	0.632153	0.417497	0	0.355666	0	0	0	0	0
A0A0A0MS59;A0A0C4DFX4;Q6ZRS2;Q6ZRS2-2;Q6ZRS2-3	0	0	0	0	0	0	0	0	0	0	0	0	0	1
A0A0A0MS79;O14513	0.409238	0	0	0	0	0	0	0.100011	0	0.0942798	0	0.134202	0	1
A0A0A0MS87	0.56387	1	0.435558	0.428394	0.383134	0.17775	0.0990155	0.0657805	0.0430109	0.033722	0.0255591	0.0163581	0	0.00114929
A0A0A0MS98;P02730;P02730-2	0	0	0	0	0	0	0	0.52583	1	0.347352	0	0	0	0
A0A0A0MS99;I3L4X2;P33527;P33527-2;P33527-3;P33527-5;P33527-9	0	0	0	0	0	0.0833363	0.207916	0.479562	0.632587	1	0.787639	0.463403	0.456581	0.478391
A0A0A0MSA9;A0A0C4DG49;P15151;P15151-2;P15151-3;P15151-4	0	0	0	0	0	0	0	0	0	0	1	0	0	0
A0A0A0MSB4;Q6ZN50;Q969R2;Q969R2-2;Q969R2-3;Q969R2-6	0.820013	1	0.68589	0.649711	0.820352	0.858348	0	0.43512	0.578639	0	0	0	0	0
A0A0A0MSB8;Q9UPT5;Q9UPT5-1;Q9UPT5-2;Q9UPT5-5;Q9UPT5-6	0	1	0.283721	0.322766	0.693637	0.11655	0.494197	0.489432	0.694868	0.736899	0.899598	0.658885	0.716206	0.472609
A0A0A0MSD0;Q4LDE5;Q4LDE5-3
A0A0A0MSE3;D3DNG8;P30556	0	0	0	0	0	0	0.392395	0.688458	0.911398	1	0.579554	0.585063	0	0.906337
A0A0A0MSG0;A6NGB9	0.474862	0.883382	0.451367	0.71157	1	0.407959	0	0	0	0	0	0	0	0
A0A0A0MSH9;A0A494C1F7;A0A494C1P7;Q86WJ1;Q86WJ1-2;Q86WJ1-4	0	0	0	0.295394	0.667714	0.239998	0.543238	0.438084	0.420537	1	0	0	0	0.821329
A0A0A0MSI2;B3KPJ4;Q8IXK0;Q8IXK0-2;Q8IXK0-3;Q8IXK0-4;Q8IXK0-5	0.137802	0.579717	1	0.474937	0.295029	0.347945	0.0732747	0.0575266	0.0363119	0.0166548	0.0470201	0.0152684	0.0450797	0
A0A0A0MSI6;B7Z1P2;Q9H4M3;Q9H4M3-2	0	0	0	0	1	0.880997	0.649225	0	0	0	0	0	0	0
A0A0A0MSI8;O00471	0.515812	0.52562	0.58285	0.603957	0.419729	0	0.0733449	0.403973	0.259661	0.5295	0.203455	1	0.364264	0.572735
A0A0A0MSJ9;Q15283;Q15283-2	0	0.396075	0	0	0.482273	0	0.490467	0.78574	0.635153	1	0	0	0	0
A0A0A0MSK3;A0A0C4DH47;A0A498U6I9;C9JS68;P24557;P24557-2;P24557-3;P24557-4;Q53F23	0	0	0	0	1	0	0	0	0	0	0	0	0	0
A0A0A0MSK6;Q13017;Q13017-2	0.708835	0.740119	0.526092	0.489374	0.30525	0	0.430232	0.464283	0.840962	1	0.484688	0.484542	0.470714	0.538561
A0A0A0MSL1;Q8TDM6;Q8TDM6-2;Q8TDM6-3;Q8TDM6-4	0	0	0	0	0	0	0.339871	0	1	0.410033	0	0	0.278797	0
A0A0A0MSM0	0.274962	0	0.411465	0.500125	0.196577	0.255497	0.996895	0.681062	0	0.695699	0	0	0.210661	1
A0A0A0MSP4;Q86WC4	0	0	0	0	0	0.538353	0.783409	0.93326	1	0.411788	0.33921	0	0	0.12241
A0A0A0MSQ0;P13797;P13797-2	0.650001	1	0.624664	0.435204	0.388328	0.106437	0.11258	0.249833	0.271231	0.30667	0.162077	0.12333	0.163285	0
A0A0A0MSS0;P60880	0	0	0	0	0	0.262308	0	0	1	0.595545	0.582751	0	0	0.241333
A0A0A0MSS7	0	0	0	0	0	0	0	0	0.182926	0	0	1	0	0
A0A0A0MSS8;P42330	0.767196	1	0.638398	0.399504	0.310307	0.208121	0.166817	0.0856844	0.0531042	0.062154	0.0245517	0	0.00428314	0.00196602
A0A0A0MST8;C9JRP1;E9PFN4;Q9Y6M7;Q9Y6M7-12;Q9Y6M7-13;Q9Y6M7-2;Q9Y6M7-6;Q9Y6M7-7;Q9Y6M7-8;Q9Y6M7-9	0	0	0	0	0	0	0.870808	0.930457	0	0	0.196349	0	0.853248	1
A0A0A0MSU4;O94911-3	0.476789	0	0	0.259702	0.370346	0.371251	0.497891	0.418482	0.697763	0.892103	0.758492	0.601187	0.620428	1
A0A0A0MSV9;A0A0G2JH37;A0A0G2JKZ1;A2AB90;O15533;O15533-2;O15533-3	0.0332245	0	0	0.0153357	0.0442355	0.34034	0.813522	0.750864	1	0.664692	0.533035	0.63313	0.621524	0.43358
A0A0A0MSX9;P41252	0.160631	0.205437	1	0.765027	0.488961	0.385513	0.246655	0.175667	0.105116	0.144563	0.0692813	0.0247775	0.0428131	0
A0A0A0MSY7;O00142;O00142-4;O00142-6	0.130946	0.0738346	0.0560414	0.058581	0.0399271	0	0.02458	0.126369	0.0476511	0.102418	0.276261	1	0.733924	0.444344
A0A0A0MSZ9;Q05048	0	0.0686466	0.0317654	0.0450855	0.00937249	0.062315	0.0158162	0.0116105	0.0568778	0.0900687	0.132626	0.19646	0.197932	1
A0A0A0MT02;A2ABK4;P18615;P18615-3	0.0848906	0.182373	0.21175	0.346968	0.371289	0.549627	0.354193	0.26355	0.273304	0.283372	0.358215	0	1	0.602522
A0A0A0MT16;Q86UQ4;Q86UQ4-3;Q86UQ4-4	0	0	0	0	0	0	0.70331	0	0.231594	0	0.806501	0.752556	0.824273	1
A0A0A0MT32;P38571;P38571-2	0.284894	0.411557	0	0.0449518	0.262131	0.44748	0.308301	0.300492	0.350951	0.607563	0.531539	0.562984	0.528912	1
A0A0A0MT35;A0A2P0CTB1;Q8TBF2;Q8TBF2-3	0.865192	1	0.235685	0.374135	0.429932	0.228775	0.0996927	0.112083	0	0.0821613	0.226954	0.598414	0.481891	0.0961557
A0A0A0MT61;G5E979;H7BYM2;Q8WYN0;Q8WYN0-3;Q8WYN0-5	0.306809	0.634045	0.144634	0.129422	0.0701112	0.0128694	0.10353	0.0892658	0.138553	0.075652	0.474115	0	1	0.0760799
A0A0A0MT72;C9JUH3;Q9BSQ5;Q9BSQ5-2;Q9BSQ5-3	0.763922	0	0.819676	0.612651	0.505662	0.478545	1	0.477496	0.558831	0.544385	0	0	0	0
A0A0A0MT83;P26440	0.0630536	0.0820169	0.0519929	0.0428447	0.012585	0.0206457	0.00524462	0	0.0266158	0.0700142	0.349512	1	0.815192	0.534255
A0A0A0MT93	0	0	0	0	0	0	0	0	0.0228766	0	0	0	0	1
A0A0A0MTC2;D6RA37;D6RDV0;D6RIY7;Q13454;Q13454-2	0	0	0	0	0	0	0.3056	0.326815	0.490022	0.603939	0.424228	0.835544	0.832597	1
A0A0A0MTG5;P13232;P13232-2;Q5FBX5	0	0	0	0	0	0	0	0	0.583876	0	0	0	1	0
A0A0A0MTH3	0.0676466	0.0789109	0	0.113175	0.175783	0.203994	0.406278	0.39753	0.624956	1	0.868125	0.841207	0.968047	0.997688
A0A0A0MTH9;O14981	0.730231	0.978844	0.644854	0.553732	0.415358	0.252974	0.504759	0.429097	0.21798	0.198979	0	0.176898	0	1
A0A0A0MTJ9;Q6PIU2;Q6PIU2-2	0	0	0	0	0.12351	0.460125	0.915159	0.720499	0.716295	0.929923	0.652115	0.951491	1	0.542025
A0A0A0MTK0;A0A0A0MTP0;F5GWB1;Q7Z6B0;Q7Z6B0-2	0.539619	1	0.686838	0	0.186733	0.132711	0	0	0	0	0	0	0	0
A0A0A0MTK4;A0A1B0GTZ1;Q8NB59;Q8NB59-2;Q8NB59-3;Q8NB59-5;Q8NB59-6;Q8NB59-7
A0A0A0MTL6;Q6ZS17;Q6ZS17-2;Q6ZS17-3;Q6ZS17-4	1	0.601183	0.284178	0.596172	0.663227	0.505816	0.625189	0.589367	0.852451	0.693165	0	0	0.119786	0
A0A0A0MTL7;A0A0D9SGH8;C6ZRJ6;C6ZRJ7;C6ZRK5;E2GH26;Q5JRY3;Q5JRY4;Q5JRY5;Q5VVR7;Q9NQB0;Q9NQB0-10;Q9NQB0-11;Q9NQB0-12;Q9NQB0-13;Q9NQB0-14;Q9NQB0-15;Q9NQB0-16;Q9NQB0-17;Q9NQB0-2;Q9NQB0-3;Q9NQB0-4;Q9NQB0-5;Q9NQB0-6;Q9NQB0-7;Q9NQB0-8;Q9NQB0-9	0	0	0	0	0	0	0	0	0	0.0586521	0	0	0	1
A0A0A0MTN0;Q13617;Q13617-2	0.452897	1	0.74063	0.469398	0.334799	0.240626	0.185325	0.119536	0.0562162	0.139848	0.0734106	0.108534	0.066911	0
A0A0A0MTN3	1	0.339573	0.111517	0	0.145929	0	0	0	0	0	0	0	0	0
A0A0A0MTP7;F8VXG7;Q99590;Q99590-2	0	0.0647467	0.525816	0.642149	0.143194	0.182224	0.253567	0.0668428	0.199644	0.129742	0.439007	0.664841	0.506389	1
A0A0A0MTQ3;Q96N23;Q96N23-2	0	0	0	0	0	0	0	0	0	0.397032	0.43952	0.428077	1	0.260284
A0A0A0MTQ8;P0C221
A0A0A0MTR7;Q63HN8	0.106864	0	0.336339	0.994129	1	0.604743	0.762093	0.539395	0.349071	0.473557	0.164751	0.230032	0.122518	0.13977
A0A0A0MTS7;Q8WZ42;Q8WZ42-12;Q8WZ42-13;Q8WZ42-2;Q8WZ42-8	0.200875	0.148829	0.104151	0.0545585	0.0541666	0.0401416	0.0667292	0	0.0557853	0.0658292	0.762747	0.728372	0.970775	1
A0A0A0MTS9;K7EKZ0;K7EP24;K7ER94;Q2V2M9;Q2V2M9-2;Q2V2M9-3;Q2V2M9-4
A0A0A0MTU3;Q4ZIN3;Q4ZIN3-2	0	0	0	0	0.131078	0.298503	1	0.84748	0.838498	0.692008	0.440754	0.392571	0.433725	0.176707
A0A0A6YYA0;Q86XR7-2;Q9Y3B3;Q9Y3B3-2	0.176473	0	0.0852964	0.18492	0.280751	0.809106	1	0.645084	0.328296	0.419537	0.254731	0.42623	0.243419	0.278308
A0A0A6YYC0;E9PJN1;O75676;O75676-2	0	0.922841	0	1	0	0	0	0	0	0	0	0	0	0
A0A0A6YYC7;Q96JP5;Q96JP5-2	0.720937	1	0.78914	0.858378	0.518866	0.55632	0.307233	0.329013	0.0586632	0.163644	0.255804	0.0515609	0	0.264607
A0A0A6YYG9;F8WCF6;F8WDD7;P59998;P59998-2;P59998-3	0.624528	1	0.949162	0.400752	0.422364	0.163156	0.209622	0.24676	0.214222	0.250736	0.0817037	0.00935124	0	0.0405088
A0A0A6YYH1;Q7Z6K5;Q7Z6K5-2	0.466259	1	0.775411	0.582858	0.689244	0.336446	0.19288	0.152908	0.135374	0.0930958	0.0914676	0	0	0
A0A0A6YYI3;A0A0B4J1V8;A8MV53;Q9NQ55;Q9NQ55-2;Q9NQ55-3	0	0	0	0	0	0	0	0	0	0.215923	0	0.0777243	0	1
A0A0A6YYL2;P0DMM9;P0DMM9-3;P0DMN0	0.700658	1	0.59785	0.413997	0.422906	0.305517	0.161757	0.123797	0.0995049	0.0966974	0.076399	0.115227	0.037423	0
A0A0A6YYL4;P57737-3	0.0924268	0.383372	0.125374	0.0745365	0.0334482	0.0357424	0	0.0523138	0.0481608	0.121083	0.717741	1	0.67136	0.455496
A0A0B4J1R2;Q9H6R3	0.0605042	0.0860371	0.0459927	0.0298182	0.014009	0	0.0409279	0.0200636	0.0529178	0.0981926	0.326779	1	0.968854	0.600756
A0A0B4J1R4;P32754	0.624134	1	0.638425	0.428438	0.352401	0.259788	0.175127	0.112656	0.0776047	0.0702499	0.0296345	0.0132055	0.00898906	0
A0A0B4J1R7;Q96B45	0.955904	0.661975	0.887164	0.644384	0.907339	0.942836	0.507773	0.565998	0.548317	1	0.908983	0.328401	0.516141	0
A0A0B4J1S8;Q9UBF8;Q9UBF8-2;Q9UBF8-3	0.445303	0.60691	0.609091	1	0.754067	0.337728	0.402013	0.322129	0.196687	0.396225	0.167593	0.163335	0.175863	0
A0A0B4J1W0;B9TX62;F5GY88;H0YEG1;O75448;O75448-2	0	0	0	0	0	0	0	0	0	0	0	0	0	1
A0A0B4J1Y2;Q8NDW8;Q8NDW8-3;Q8NDW8-5;Q8NDW8-6;Q8NDW8-7	0	0	0	0	0	0	0.441683	0.44208	0.689386	0.647515	0.528849	1	0.911101	0.619665
A0A0B4J1Z1;C9JAB2;Q16629;Q16629-2;Q16629-3;Q16629-4	0.049743	0.0519719	0.0662709	0	0.00555065	0.0346014	0.0448528	0.081133	0.11326	0.156894	0.160012	0.261369	0.349005	1
A0A0B4J221;E9PR99;Q96LU5	0	0	0	0	0	0	0	0	0	0	0	1	0	0.5083
A0A0B4J269	0.0272947	1	0.183905	0.427553	0.285817	0.70958	0.191157	0	0	0.0898038	0	0.152006	0	0
A0A0B4J291;Q8N8U2	1	0	0	0.374363	0.379299	0	0.186917	0	0	0	0	0	0	0
A0A0B4J294;H3BP13;Q9UL33;Q9UL33-2	1	0.632238	0.596965	0.450115	0.713611	0.504651	0.43267	0.348831	0.354902	0.142309	0.153696	0	0	0.237191
A0A0B4J297;I3L4V0;Q9BRA0;Q9BRA0-2	0	0.00376432	0.0438282	0.200369	0.326267	0.463294	0.529907	0.492363	0.927968	0.694956	0.969433	0.833127	1	0.270372
A0A0B4J2A0	0.657188	1	0.586311	0.567257	0.395263	0.226946	0.155303	0.11465	0.0651936	0.0862704	0.0136268	0.0402204	0.0823498	0
A0A0B4J2C2;F8WF49;Q9Y2H0;Q9Y2H0-1;Q9Y2H0-3	0.453402	1	0.570004	0.462315	0.430553	0.247658	0.116975	0.164257	0.0944084	0.0732411	0.067651	0	0	0
A0A0B4J2C3;J3KPG2;P13693;Q5W0H4	0.238749	1	0.629096	0.882616	0.696962	0.598813	0.489625	0.251169	0.226559	0.136604	0.161981	0.179261	0.244262	0
A0A0B4J2D5;P0DPI2	0	0	0	0	0	0	0	0.0989415	0	0.188943	0.506032	1	0.851594	0.269
A0A0B4J2E5;Q15269	0	0	0	0	0	0	0	0	0	0.0124754	0	0.0510523	0	1
A0A0B4J2F0	0	0	0	0	0	0	0	0	0.0722937	0.0542519	0.580092	1	0.746242	0.322264
A0A0B4J2F8;E2QRJ6;F6S314;P52435	0.144872	0.288181	0.525872	0.283185	0.325021	0.192558	0.176267	0.0790358	0.148568	0	0.191566	0.214007	0.236848	1
A0A0B4J2G4;Q15345;Q15345-3	0.406824	1	0.49652	0.54444	0.446685	0.340421	0.299705	0.494885	0.288851	0.151452	0.0533575	0.951683	0	0.662783
A0A0C3SFZ9;M0QXD1;M0QY09;M0QZE1;M0QZI3;M0R1K4;M0R3E5;O14526;O14526-2;O14526-3	0	0	0	0	0	0	1	0	0	0.0775641	0	0	0	0
A0A0C4DFL7;Q16850	0.10839	0	0.041581	0.114789	0.246121	0.403877	1	0.820974	0.912182	0.637016	0.397376	0.455025	0.4115	0.415684
A0A0C4DFL8;F5GX28;O94953	0	0	0	0	0	0	0	0	0	0	0	0	0	1
A0A0C4DFM1;Q92544	0.292901	0	0.120153	0.26104	0.461656	1	0.91251	0.484589	0.229107	0.267269	0.167753	0.163556	0.100832	0.293327
A0A0C4DFM7;Q5TAX3	0	0.861752	0.517496	0.881368	0.911787	0.352428	0.662932	0.75461	1	0.735682	0.494402	0.58245	0	0.514159
A0A0C4DFP6;Q5T4F6;Q9NQ79;Q9NQ79-2;Q9NQ79-3	0.0578331	0.0821363	0.0368683	0.0284609	0	0.0120162	0.0135393	0.0137516	0.0569886	0.203339	0.492654	1	0.734496	0.24991
A0A0C4DFR1;O75069;O75069-2;O75069-3;O75069-5
A0A0C4DFU4;Q9HBG7-4	0.546226	0	1	0.830235	0	0.314299	0.536822	0.409734	0.0882937	0.0784297	0	0	0	0
A0A0C4DFV0;Q9H469	0.430359	1	0.850475	0.706685	0.78694	0.512386	0.36689	0.336283	0.216275	0.174249	0.078399	0	0.190134	0
A0A0C4DFW4;Q5JUR7	0	0	0	0	0	0	0.161193	0.0562108	0	0.170435	1	0.138052	0	0.273637
A0A0C4DFX9;Q9H3P2	0.00645922	0.0235827	0	0.11126	0.0767371	0.112745	0.200338	0.0660057	0.112778	0.252827	0.45355	0.472733	0.878491	1
A0A0C4DFY5;A8MXZ4;J9JIE0;Q9NQ84;Q9NQ84-2	0	0	0	0	0.371483	0.30361	0.420502	0.552855	0.533716	0.652168	0.471687	0	0	1
A0A0C4DFY7;Q6UWW8;Q6UWW8-2	0	0	0	0	0	0	0	0	1	0	0	0	0	0
A0A0C4DFZ2;P15289;P15289-2	0.0557885	0	0.164406	0.163837	0.189073	0.332845	0.54687	0.539931	0.587522	0.731109	0.765338	1	0.824469	0.537944
A0A0C4DG02;F8WE91;Q9Y6K1;Q9Y6K1-2	0	0	0	0	0	0	0	0	0	0	0	0	0	1
A0A0C4DG17;C9J9K3;P08865	0.0460326	0	0.120786	0.19592	0.254263	0.32522	0.351204	0.45675	0.606364	0.533934	0.834245	0.983223	1	0.602443
A0A0C4DG26;Q9NP71;Q9NP71-2;Q9NP71-3;Q9NP71-4;Q9NP71-6	0.562711	0.599299	1	0.725899	0.931193	0.481788	0.547425	0.479126	0.429005	0.283949	0.187242	0	0	0
A0A0C4DG40;Q8NF91;Q8NF91-4	0.193796	0.210313	0.142179	0.358027	0.395227	0	0.187241	0.129331	0.273473	0.278827	0.310327	0.841623	0.607013	1
A0A0C4DG51;Q9NP80;Q9NP80-3	0.0766347	0	0.911112	0	0	0.0821146	0.0833684	0.147423	0.319904	0.329114	0.570681	1	0.693132	0.456024
A0A0C4DG60;F8W7P9;Q9H903;Q9H903-1;Q9H903-3;Q9H903-5
A0A0C4DG62;F5GYV5;F8WCT1;H7BZV4;Q66PJ3;Q66PJ3-2;Q66PJ3-3;Q66PJ3-4;Q66PJ3-7	0.423015	0.243819	0.147432	0.273977	0	0.144307	0.103775	0.271976	0.417424	0.440411	0.290022	0.538339	0.370838	1
A0A0C4DG80;Q9P2N7;Q9P2N7-2;Q9P2N7-3;Q9P2N7-4;Q9P2N7-5	0.237291	0	0	0.097906	1	0.400416	0.504428	0.145794	0.268277	0	0.29376	0	0	0
A0A0C4DG85;P40394;P40394-2	0.642318	1	0.561042	0.299971	0.246167	0.169306	0.109797	0.0844781	0.0451559	0.0473596	0.0274396	0.00392814	0.00398198	0
A0A0C4DG88;P14859;P14859-2;P14859-3;P14859-4;P14859-5;P14859-6	0.217383	0	0	0.17561	0	0.552272	0	0.165701	0	0	0	0	0	1
A0A0C4DG89;Q7L014	0.00460474	0.00594057	0.0362128	0.0257905	0.0337729	0	0.0569988	0.0302025	0.054002	0.193777	0.204604	0.344962	0.4553	1
A0A0C4DG90;A4D0S4;A4D0S4-3	0	0	0	0	0	0	0	0	0.150036	1	0	0	0	0
A0A0C4DG91;A0A2R8Y7V2;C9J9V6;C9JQB1;O75414	0.0505027	0.00275381	0	0	0.0304012	0.0110567	0.0444966	0.0498924	0.0460197	0.133313	0.343572	1	0.734341	0.51991
A0A0C4DG94	0	0	0	0	0	0.279524	0	0.472703	0	0	0	1	0	0
A0A0C4DG95;C9IYJ2;E9PD56;F8WDF7;H7BYG4;Q7Z7A4;Q7Z7A4-2;Q7Z7A4-4;Q7Z7A4-6;W5RWE6	0	0	0	0	0	0	0.271876	0	0.413054	1	0	0	0	0
A0A0C4DGA2;O75521;O75521-2	0.0843739	0.097932	0.0467079	0	0.0120945	0.0122058	0.0021221	0.0755155	0.262151	0.228238	0.548876	0.96565	1	0.643953
A0A0C4DGA6;Q14527;Q14527-2	0	0	0	0.172312	0	0.0963216	0.310201	0.147294	0.310804	0.317481	0.111031	0.638924	0.730433	1
A0A0C4DGA7;O94929;O94929-3	0	0	0	0	0	0	0.0530466	0.0886135	0.225026	0.538577	0.405155	0.301151	0.111789	1
A0A0C4DGB0;Q9UIL1;Q9UIL1-2;Q9UIL1-3	0.554681	1	0.554642	0.686256	0.404969	0.25606	0.149482	0.149126	0	0.182625	0.306766	0.18895	0	0.38447
A0A0C4DGB9	0.057592	0.12722	0.0522	0.0376627	0.033055	0.00876633	0	0.0129653	0.0511405	0.0669698	0.341839	0.991836	1	0.386498
A0A0C4DGE4;A0A0J9YW33;A0A286YF28;Q13277;Q13277-2;Q13277-3	0	0	0	0	0	0.316021	0.846822	0.834365	1	0	0	0	0	0
A0A0C4DGE6;A0A0G2JNY3;A0A0G2JRG8;E9PIR1;E9PNT2;Q6ZUM4;Q6ZUM4-2;Q6ZUM4-3	0	0	0	0	0	0	0	1	0	0	0	0	0	0
A0A0C4DGE7;Q86UK5;Q86UK5-2;Q86UK5-3	0.496347	0.996558	1	0.769423	0.504308	0	0	0	0	0	0	0	0	0
A0A0C4DGF7;Q6UXC1;Q6UXC1-2;Q6UXC1-3	0.0878342	0.093189	0.0594717	0.0938934	0.0632829	0.0400782	0	0.0426844	0	0	0.163185	0.893917	1	0.451085
A0A0C4DGG1;Q9UKS6	0.156668	0	0.0484166	0.233407	0.154033	0.256681	0.371931	0.366141	0.61929	0.765446	0.829084	0.916917	0.467804	1
A0A0C4DGG9;A0A2R8Y212;A0A2R8Y425;A0A2R8Y521;A0A2R8Y5J0;A0A2R8YFK9;A0A2U3TZM0;F5GWX5;Q14839;Q14839-2	0.0187951	0.0434238	0.0491475	0.0144156	0.040177	0.0285227	0.0108981	0.0216854	0	0.0556291	0.0816887	0.112565	0.179079	1
A0A0C4DGH0;Q5ZPR3;Q5ZPR3-3;Q5ZPR3-4	0.14815	0	0	0	0.0801683	0.136922	0.316478	0.507676	0.815513	0.679735	1	0.946474	0.660925	0.72704
A0A0C4DGH6;A0JNW5	0	0.111924	0.632791	1	0.772092	0.583968	0.360475	0.398679	0.288722	0	0	0	0	0
A0A0C4DGI4	0	0	0	0	0	0	0	0	1	0.732923	0.256522	0	0	0
A0A0C4DGM9;B7Z896;F5H3M2;Q9BVG8;Q9BVG8-2;Q9BVG8-4;Q9BVG8-5;Q9BVG8-6	0	0	0	0	0	0	0	0	0	0.804766	1	0.508232	0	0.990999
A0A0C4DGN6;J3QRU8;Q9Y2X7;Q9Y2X7-3	0	0.00302099	0.160884	0.110161	0.298357	0.1357	0.128948	0.0765776	0.12334	0.223922	0.674314	1	0.662609	0.260516
A0A0C4DGP0;E7EU35;Q9UKF7-2	1	0.28888	0.297775	0.424125	0.395092	0.235696	0.179084	0.142563	0	0.0736762	0	0	0	0
A0A0C4DGQ4;Q86W25	1	0	0	0.883959	0	0.481912	0.560411	0.227063	0	0	0.220324	0	0	0
A0A0C4DGQ5;P04632	0.513239	1	0.74533	0.606222	0.765182	0.315248	0.173205	0.153247	0.083173	0.0768558	0.0633718	0.0232047	0.0312313	0
A0A0C4DGQ8;Q6IAN0	0.191098	0	0	0	0.149183	0.305963	0.65681	0.875862	0.836491	0.961552	0.907381	1	0.970623	0.687103
A0A0C4DGR2;M0QY25;M0QYH7;M0QYQ4;M0QZQ2;Q71SY5;Q71SY5-4;Q71SY5-5;Q71SY5-6;Q86YD1;Q86YD1-2	0	0	0	0	0	0	0	0	0	0	0	0	0	1
A0A0C4DGR5
A0A0C4DGS1;P39656;P39656-3	0.0607812	0	0.00717082	0.0209497	0.0498477	0.114528	0.32175	0.476974	0.512257	0.501708	0.604508	1	0.899375	0.552874
A0A0C4DGV4;E9PLX3;O43504;R4GMU8	0.169702	0.151176	0.0467808	0.206518	0.115116	0.377237	1	0.61562	0.744844	0.460252	0.444307	0.346779	0.239272	0
A0A0C4DGZ4;Q9Y5U4	0	0	0	0	0	0	1	0.982605	0.570303	0.487009	0	0	0	0
A0A0C4DH01;Q9NVU0;Q9NVU0-2;Q9NVU0-3;Q9NVU0-4;Q9NVU0-5	1	0	0.704119	0.854112	0.533346	0.453269	0.506846	0.373393	0.0548786	0.0785994	0.0577185	0.0434092	0	0.252113
A0A0C4DH07;Q8N2S1;Q8N2S1-2;Q8N2S1-3	0	0	0	0	0	0.601852	0.460886	0.458539	0.677432	0.775562	0.777398	0.836856	0.247224	1
A0A0C4DH13;E5RG96;J3KQJ9;Q8N2E2
A0A0C4DH16;B8ZZS0;H7BXT7;Q9NYM9	0	0	0	0	0.0324904	0.635997	1	0.239587	0	0	0	0	0	0
A0A0C4DH36	0	0	0.91007	1	0.672695	0.224991	0.230033	0.0866947	0	0.131773	0.168391	0.420318	0	0
A0A0D2X7Z3;Q49AN0;Q49AN0-2	0.183377	1	0	0	0.670531	0	0.359381	0.693405	0	0	0	0	0	0
A0A0D5XQ77;A0A0U5Q247;A0A140T8Z5;A0A140T981;A0A140T9R6;A0A140T9Y4;A0A140T9Z9;A0A140TA15;P01920;Q29967	0	0	0	0	0.232222	0.436179	0.545058	0.635747	1	0.989136	0.519627	0.451281	0.467661	0
A0A0D9SEI0;Q9P0P8	0	0	0	0	0	0.113936	0	0.0553264	0.160514	0	0.601733	1	0.959257	0.583025
A0A0D9SEI3;A0A0D9SEN2;A0A0D9SER5;P21127;P21127-2;P21127-3;P21127-8	0.187557	0.460098	0.485382	0.301098	0.247067	0.172367	0.0810124	0	0.121854	0.222195	0.0825953	0.686837	0.329365	1
A0A0D9SEJ5;F5GY05;Q96EK7;Q96EK7-2	0	0	0	0.903378	1	0.43082	0.943371	0.92896	0.827709	0.790734	0	0	0	0
A0A0D9SEK1
A0A0D9SEN7;A0A2R8Y7Z3;I3L0L0;Q13950;Q13950-2;Q13950-3	0.0608513	0	0.102192	0.110997	0.118294	0.217977	0.273507	0.309259	0.410254	0.478165	0.583722	0.740748	0.533457	1
A0A0D9SES8;H0YKN8;H0YKT5;H0YL70;H0YNI7;H0YNT2;Q04724;Q04726;Q04726-2;Q04726-3;Q04726-4;Q04726-5;Q04726-6;Q04726-7;Q04727;Q04727-2;Q04727-3;Q04727-4	0.720872	1	0.779326	0.624379	0.644719	0.499032	0.377023	0.398041	0	0.382827	0	0	0.257939	0.189269
A0A0D9SET2;A0A0D9SFD0;A0A0D9SGI5;A0A0R4J2G5;A0A1B0GTW4;A0A1B0GV32;D6R942;D6RB91;D6RC63;D6RCM6;D6RG14;D6RG21;D6RJA7;D6RJG6;D8L7E9;H0YM62;Q02078;Q02078-2;Q02078-3;Q02078-4;Q02078-5;Q02078-6;Q05BX2;Q06413;Q06413-2;Q06413-3;Q06413-4;Q06413-5;Q06413-6;Q14814;Q14814-2;Q14814-3;Q14814-4;Q14814-5;Q14814-6	0.110046	0	0	0	0.00144308	0	0.224199	0.0905208	0.207117	0.188181	0.123238	0	0	1
A0A0D9SEU5;Q6VN20;Q6VN20-3;R4GMX8	0.443601	0.603506	1	0.657997	0.545202	0.330447	0.183149	0.264778	0.180264	0.227948	0.0101466	0	0.0726417	0.0733782
A0A0D9SEX5;Q9H6R6;Q9H6R6-2	0	0	0	0	0	0	0	1	0	0.353801	0	0	0	0
A0A0D9SEY1;E7EN19;E7ENQ1;G3XAA2;G5E948;H7C360;O95819;O95819-2;O95819-3;O95819-4;O95819-5;O95819-6	0.212519	1	0	0.251571	0.0535266	0.255143	0.0124371	0.0290828	0.0363654	0.0740755	0.0360807	0.0211802	0.0193302	0.0580735
A0A0D9SF07	0	0	0	0	0	0	0	0	1	0	0	0	0	0
A0A0D9SF44;A0A0R4J2E2;Q9Y3T6;Q9Y3T6-3	0	0	1	0.339061	0.512494	0.356766	0.454401	0	0.604008	0	0	0	0	0
A0A0D9SF53;A0A0D9SFB3;A0A0D9SG12;A0A2R8Y4A4;A0A2R8Y645;A0A2R8YCW1;A0A2R8YF78;A0A2R8YFR4;A0A2R8YFS5;A0A2U3TZJ9;O00571	0.227481	0	0.183266	0.383761	0.653158	0.781568	0.72393	0.823795	0.883806	1	0.673108	0.814831	0.890813	0.911356
A0A0D9SF60;Q99569;Q99569-2	0.313576	0	0.110741	0	0	0.0126729	0.158385	0.313871	0.518141	0.638927	0.641589	0.748575	0.508034	1
A0A0D9SF63;Q9BZK7	0.434653	0.92289	0.848842	0.545885	0.166764	0.184735	0.228726	0.193258	0.076662	0.196237	0	0.223246	0.429158	1
A0A0D9SFB1	0	0	0	0	0	0	0.196199	0.157558	0.276166	1	0.547594	0.485529	0.312595	0.292584
A0A0D9SFB5;P08319;P08319-2	0.634577	1	0.676022	0.46265	0.419847	0.289472	0.19122	0.156012	0.103583	0.107442	0.0388597	0.0143767	0.022219	0
A0A0D9SFE1;Q9H936	0.0288689	0	0.0055475	0.00646625	0.0217793	0.0502271	0.0861774	0.21553	0.217807	0.343812	0.62739	1	0.887905	0.494278
A0A0D9SFG6;O43739;O43739-2;Q15438;Q15438-2;Q15438-3;Q99418;Q99418-2	1	0.600052	0.854541	0.778766	0.451177	0.290149	0.482299	0	0.403269	0.553542	0.157068	0	0.329686	0.797079
A0A0D9SFJ2;A0A1B0GWF1;A0A2R8Y5Y4;A0A2R8Y6P1;Q6ZU35	0	0	0	0	0	0	0	0	0.274736	0.255914	0.37309	0.48704	1	0.263698
A0A0D9SFK2;Q92614;Q92614-3;Q92614-4	0.289848	0.38506	0.585578	0.483737	0.375825	0	0.459773	0.203844	0.321307	0.770944	0.41255	0.598593	0.260347	1
A0A0D9SFM0;Q149N8;Q149N8-4	0	0	0	0	0	0	1	0	0	0	0	0	0	0
A0A0D9SFR6;Q16760;Q16760-2;Q86XP1;Q86XP1-2;Q86XP1-3;Q86XP1-5	0.318916	0	1	0	0.686062	0.788917	0	0.460476	0	0.186405	0	0	0	0
A0A0D9SFT8
A0A0D9SG52;Q6ZWI9	0	0	0	0	0	0	1	0	0.71584	0.555809	0	0	0	0
A0A0D9SG71;P49459;P49459-3	0.357576	0.659083	0.38792	1	0.54937	0.519521	0.240193	0.241295	0.17206	0.122816	0.114817	0	0.125773	0
A0A0D9SG72;A0A1B0GTP9;A0A1B0GVQ5;A0A1B0GWF2;A0A2R8Y5D4;P61764;P61764-2	0.27653	0	0.153531	0.147034	0.185614	0.213936	0.467242	0.65447	1	0.8659	0.857214	0.563012	0.767066	0.794181
A0A0D9SG79;Q9NZ09;Q9NZ09-3;Q9NZ09-4	0	0	0.417553	0	1	0.124589	0.41354	0	0	0	0	0	0	0
A0A0D9SG96;Q9ULB1-3	0	0	0.885698	1	0.991659	0.458797	0.623673	0.687351	0.599069	0.274306	0	0	0	0
A0A0D9SGD6;B0QZE2;B7Z2J6;E7ENI9;E7EV75;Q15326;Q15326-2;Q15326-5	0	0	0	0	0	0.911288	0	0	0.0379066	0.0322406	0.244869	0.0753346	0	1
A0A0D9SGE8;Q5JRC6;Q8IWS0;Q8IWS0-2;Q8IWS0-3;Q8IWS0-4;Q8IWS0-5	0	0	0	0	0	0.534969	0.150689	0	1	0	0	0	0	0
A0A0D9SGF6;Q13813;Q13813-2	0.341923	0.0545217	0.0591103	0.0521419	0.0521966	0	0.1254	0.183003	0.56774	0.708508	0.716387	0.584035	0.558509	1
A0A0D9SGH0;A0A1B0GV11;Q92581;Q92581-2;Q92581-3	0	0	0.128871	0.46159	0.738074	0.670337	1	0.804799	0.456904	0.391674	0.17345	0	0	0.0981307
A0A0D9SGJ6;C9JFZ1;J3KPK1;J3KQV8;O43426;O43426-2;O43426-4	0	1	0.808446	0.372548	0.457455	0.446397	0.0636734	0.311795	0.699009	0.625544	0.610716	0.330682	0.777252	0.25378
A0A0G2JH30;A0A0G2JPX0;A0A2R8YFP9;A6NK88;P49918;P49918-2	0	0	0	0	1	0	0	0	0	0	0	0	0	0
A0A0G2JH50;A0A0G2JIF0;A0A1W2PS56;A2BF26;Q5RIP0	0	0	0	0	0	0	0	0	1	0	0	0	0	0
A0A0G2JH68;O60610	0.529902	1	0.731252	0.56888	0.442326	0.275329	0.204243	0.147315	0.124008	0.135951	0.0769085	0.0548666	0.0347016	0
A0A0G2JHC2;Q6NYC8	0.277963	0	0	0	0	0	0	0.228126	1	0.318644	0.808452	0	0.280285	0.41725
A0A0G2JHJ2;Q92759;Q92759-2	0	0	0	0	0	0	0	0	0	0	0	0	0	1
A0A0G2JHL0;A0A0G2JK44;A0A140T9E9;A0A140T9F7;A0A140T9V2;H0Y6K2;P25440;P25440-2;P25440-3;U3KQA6	0	0	0	0	0	0	0	0	0	0	0.15956	0	0	1
A0A0G2JI43;A0A0G2JIJ2;A0A140T926;A0A140T9C9;A0A140T9I2;A0A140T9R0;A0A140T9R2;A0A140T9T8;A0A140T9U6;F6UB75;P28068	0	0	0	0	0	0	0	0	0	0	0	0	0	1
A0A0G2JIR1;A0A0G2JIS2;A0A0G2JK64;A0A0G2JRN8;A0A0G2JRR0;A2ABF8;A2ABF9;Q96KQ7;Q96KQ7-2	0	0	0	0	0	0	0	0	0	0	0	0	0.146499	1
A0A0G2JIW1;P0DMV8;P0DMV9	0.424322	1	0.832812	0.625462	0.597925	0.306309	0.196551	0.166575	0.14533	0.0844842	0.014946	0	0.0588867	0.0563663
A0A0G2JJD3;O95870	0.0864113	0	0.0509545	0.0859028	0.176311	0.346956	0.667311	0.957125	0.918234	0.754796	0.771926	1	0.92376	0.706079
A0A0G2JJP1;Q9C019	0.0261056	0	0.101303	1	0.662621	0.780959	0.388898	0.482505	0.738666	0.227259	0.598737	0.566292	0.677588	0.203709
A0A0G2JL52;A0A140T8Y0;A0A140TA35;B4E0K6;Q5ST30;Q5ST30-4	0.0795847	0.0621099	0.0438339	0.0364909	0	0.0241701	0.0157759	0.0256912	0.0504098	0.141942	0.502939	1	0.803401	0.503151
A0A0G2JLC7	0	0	0	0.212635	1	0.723347	0.213444	0.339671	0.106287	0	0	0	0	0
A0A0G2JLK7	0	0	0	0	0.0856763	0.184287	0.925535	0.916925	0.941491	1	0.331045	0.18322	0.74739	0
A0A0G2JLQ8;A0A0G2JLX3;A0A0G2JNC8;A0A0G2JP37;A0A0G2JPB6;A0A0G2JPQ2;F5H5B1;F5H7Q5;J3KN39;K7EJ90;K7ELX1;Q9NX02;Q9NX02-2;Q9NX02-3;Q9NX02-4	0	0	0	0	0	0	0	0.671447	0.0692367	0	1	0	0	0.84065
A0A0G2JM39;A0A0G2JN91;A0A0G2JNH1;M0QYD1	0.0755837	0	0	0	0	0	0.0639551	0.0725344	0	0	0	0	1	0.672784
A0A0G2JM63;A0A0G2JNK3;A0A0G2JPH3;Q8WX94-2;Q8WX94-3
A0A0G2JM70;Q9NV79;Q9NV79-2;Q9NV79-3;V9GZ41	0.927237	0	0	1	0	0	0	0	0	0	0	0	0	0
A0A0G2JMD2;A0A2R9YJI8	0.0399718	0	0.0666124	0.083504	0.21499	0.334873	0.85744	1	0.727511	0.559262	0.351487	0.376451	0.305147	0.239303
A0A0G2JMW3;A0A0G2JP44;Q9HBB8;Q9HBB8-2;Q9HBB8-4	0	0	0	0	0.0476554	1	0.289973	0.245993	0.423833	0.387853	0.509485	0	0	0.338647
A0A0G2JMX7;A0A0G2JPD5;A0A0G2JQJ7;A0A0G2JS76;P10636;P10636-6;P10636-7;P10636-8;P10636-9	0.174231	0.246284	0.397948	0.807556	0.588137	1	0.43404	0.844746	0.874294	0.964831	0.128684	0	0	0.475307
A0A0G2JMZ6;O60282	0	0	0	0	0	0	0	0	0.492811	0	0	1	0.313373	0
A0A0G2JMZ8;Q16625	0.582041	0.0449171	0	0.100098	0.30361	0.284123	0.328776	0.397203	0.567825	0.551831	0.74323	0.40056	0.398242	1
A0A0G2JN23;A0A0G2JQ38	0	0	0	0	0	0.0715254	0.112177	0.13079	0.342273	0.486956	0.397762	0.386851	0.335556	1
A0A0G2JN42;A0A0G2JNJ8;Q6W4X9	0	0	0	0	0	0	1	0	0	0	0	0	0	0
A0A0G2JN53	0	0	0	0	0	0	0	0	0	0.216988	0.282219	1	0.701893	0.167788
A0A0G2JN84;P59817	0	0	1	0.903272	0.790097	0.693845	0.430434	0.253688	0.21466	0.0870815	0	0.115218	0	0
A0A0G2JNW7;Q9Y666	0.246048	0	0	0	0.122205	0.190613	0.561109	0.510517	0.699279	1	0.535241	0.526242	0.37336	0.967762
A0A0G2JNZ2;A0A669KB89;Q14160	0.394319	0.00337679	0.047748	0	0.0208892	0.00264959	0.0970705	0.212056	0.564231	0.672349	1	0.579799	0.591267	0.921464
A0A0G2JPC8;B4DTC2;E7EPX8;E7ER82;Q8TC27	0	0	1	0	0.577928	0.28985	0.243785	0.297151	0.17356	0	0	0	0	0
A0A0G2JPQ3;P17693;P17693-5;Q5RJ85;Q8MH48	0	0	0	0	0	0	0.353354	0.413272	1	0.46348	0	0	0	0
A0A0G2JPZ6;A0A0J9YWU2;Q9H3Q3	0	0	0	0	0.0145692	0.151087	0.256513	0.195619	0.365979	0.297005	0.70959	1	0.731002	0.335083
A0A0G2JQC6;A0A0G2JQK9;A0A0G2JRT1;E7EWN1;Q99102-3	0	0	0.471826	0	0.44902	0.429792	0	0.433047	0.20896	0.911639	0	1	0	0
A0A0G2JQT1;A0A0G2JR96	0	0	0	0	0	0	0	0.19421	1	0	0	0	0	0
A0A0G2JRG1	0	0	0	0	0	0	0.0700421	0	0	0.507236	0.912443	0.665065	1	0.482202
A0A0G2JS52;Q01538;Q01538-2
A0A0J9YVP6;Q9UHX1-2	0.329569	0.512471	0.237547	0.0749981	0	0.0267168	0.000768017	0.0245377	0.114433	0.312573	0.204065	0.533229	0.763176	1
A0A0J9YVW4	0.544075	0.520199	0.135096	1	0	0.426279	0	0	0	0.458071	0	0	0	0.112432
A0A0J9YW18;F6RP06;Q12983	0	0	0.0635997	0.0794099	0.0717983	0.116486	0.273696	0.269869	0.278972	0.334285	0.925156	1	0.964992	0.526449
A0A0J9YW36;A0A0J9YXY4;Q9NZ72;Q9NZ72-2
A0A0J9YW63
A0A0J9YWD2;A0A0J9YX19;A0A0J9YXY6;A0A0J9YYK8;A0A1B0GTJ5;A0A1B0GU79;A0A1B0GUR8;A0A1B0GVR1;Q9UBY8	0	0	0	0	0.225683	0.4924	0.693168	0.628898	1	0	0.364152	0.814495	0.697332	0.45515
A0A0J9YWD5;A0A0J9YX88;A0A0J9YYB5;B7ZM65;E9PJ24;F8WEF5;Q9P1Y6;Q9P1Y6-2;Q9P1Y6-3	0	0	0	0.135116	0.171579	0.181172	0.212566	0.148741	0.0708317	0.146272	0.0817209	0	0.206015	1
A0A0J9YWE1;A0A0J9YWN0	0	0	0	0	0	1	0	0	0	0	0	0	0	0
A0A0J9YWL0;Q9Y4K1	0	0	0	0	0	0	0	0	0.431187	0.515803	0.721904	0	0	1
A0A0J9YWR7;A0A0J9YXE4;Q8N2F6;Q8N2F6-2;Q8N2F6-3;Q8N2F6-4	0	0	0	0	0.0696665	0.0869404	0.203559	0.160173	0.178137	0.275954	0.552096	1	0.589465	0.409157
A0A0J9YWV4;O75154;O75154-2;O75154-3;X6RFI8	0.665259	1	0.86771	0.704248	0.95961	0.404071	0.31399	0	0	0	0	0	0	0
A0A0J9YX34;A0A6Q8PEY7;A0A6Q8PF18;A0A6Q8PF63;A0A6Q8PF74;A0A6Q8PFB0;A0A6Q8PFI4;A0A6Q8PFM2;A0A6Q8PFS5;A0A6Q8PFV0;A0A6Q8PFX3;A0A6Q8PG16;A0A6Q8PGE9;A0A6Q8PGG4;A0A6Q8PGL5;A0A6Q8PH06;A0A6Q8PHE9;A0A6Q8PHG4;A0A6Q8PHP4;A0A6Q8PHR6;C9J084;Q9C040;Q9C040-2
A0A0J9YX62;C9J2C4;O75190;O75190-2;O75190-3	0.456366	1	0.829271	0.52233	0.419132	0.416757	0.0866403	0.251006	0.021309	0	0.211412	0.0525869	0.0195411	0.421954
A0A0J9YX66;A0A0J9YXJ0;A0A1B0GU44;A0A1B0GUN8;E9PC62;O95319;O95319-2;O95319-3;O95319-4;O95319-5;Q5VZZ6;V9GYD9	0	0	0	0	0	0	0	0	0	0	0	0	0	1
A0A0J9YXF2;Q15165;Q15165-1	0.140623	0	0.0388222	0.0943763	0.15335	0.329408	0.989436	1	0.860156	0.715589	0.598982	0.78367	0.641603	0.494082
A0A0J9YXM6;Q562E7	0.464279	0.521938	1	0.662203	0.638647	0.532842	0.417097	0.567149	0.355047	0.362108	0.0843792	0.0178575	0	0.0636047
A0A0J9YXN7	1	0.125067	0.0769363	0.0202884	0.0407765	0.0222527	0.00916307	0	0.0225516	0.0666355	0.0596139	0.0111982	0.0356818	0.0299044
A0A0J9YXT0;H7C5H6;Q9H0F7;Q9H0F7-2	0.422456	1	0	0.512172	0.369726	0.316532	0.30579	0.264973	0	0	0.160478	0.43802	0	0
A0A0J9YY17;A0A1C7CYW8;A0A669KB38;Q8IVF4	0	0	0.31414	0.198837	0	0	0	0.433939	0	0.491091	1	0.793766	0	0
A0A0J9YY72;A0A1W2PQQ1;Q5HYW2	0	0	0	0	0	0	0	0	1	0	0	0	0	0
A0A0J9YYF0	0	0	0	0	0	0	0	0	0	0	0	0	0	1
A0A0J9YYF7;Q86T65;Q86T65-4	0	0	0	0	0.224656	0.353107	0.564069	0.801272	0.711881	0.652514	0.826984	0	0.879803	1
A0A0K0K1A5	0.245051	0.35214	0.138709	1	0.0778021	0.0223175	0.469926	0.0164432	0.0324388	0.0870252	0.138753	0	0	0
A0A0R4J2E8;D6REM6;P43243	0.06664	0	0.0429521	0.0334088	0.0386523	0.0928498	0.121218	0.117065	0.139183	0.219837	0.268448	0.314895	0.416612	1
A0A0R4J2F3;P0DPB6	0	1	0.532155	0.825908	0.751943	0.735161	0.0933177	0.199756	0.340891	0	0.17246	0	0	0.839616
A0A0R4J2F6;Q12894;Q12894-2	0.228661	0	0.458154	0.585996	0.840694	1	0.659967	0.880216	0.818795	0.590626	0.625369	0.497386	0.480724	0.428269
A0A0S2Z4L3;A0A3B3ISJ1;G5E9F8;P07225	0.226105	0	0	0	0	0.162914	0.666154	1	0.834677	0.616859	0.485336	0.408229	0.265868	0.289608
A0A0S2Z4L7;O60603	0	0	0	0	0	0	0	0	0.957691	1	0	0	0	0
A0A0S2Z4Q7;A0A1W2PQQ6;A0A1W2PQR0;A0A1W2PR45;A0A1W2PRC6;A0A1W2PRD9;A0A1W2PRY1;A0A1X7SBT2;C9JYS9;Q9UNP4;Q9UNP4-2;Q9UNP4-3	0	0	0	0	0	1	0.706469	0.614957	0.324857	0.331006	0.239744	0	0	0.304905
A0A0S2Z5D0;A0A1B0GTU6;H3BUV4;Q9NWW5;Q9NWW5-2	0	0	0	0	0	0	0.85231	0.682237	1	0.629364	0	0	0	0.741687
A0A0U1RQC7	0	1	0	0	0.0274196	0.103097	0.0835206	0.102963	0.068216	0	0	0	0	0
A0A0U1RQE4;A0A494C1M0;Q5HYK7;Q5HYK7-2;Q5HYK7-3	1	0.879281	0.751041	0.574895	0.418235	0.547621	0.219444	0.199664	0.142112	0.125188	0.0077568	0	0.0970568	0.107217
A0A0U1RQK7	0.507515	1	0.578228	0.585049	0.566654	0.411473	0.652594	0.423474	0.580547	0.654217	0.381934	0.815568	0.62154	0
A0A0U1RQK9	0	0	0	0	0	0	0	0	0	0	0.21782	0	1	0.0605316
A0A0U1RQQ9;Q6P3W7	0.80988	1	0.168841	0.188637	0.4036	0.985902	0.947994	0.594	0.55014	0.474703	0	0.0308434	0.422621	0.432545
A0A0U1RQS4;A0A0U1RR93;Q9BYB0;Q9BYB0-3	0	0	0	0	0	0	0	0	1	0.269375	0	0	0	0
A0A0U1RQT8;Q8TCZ2;Q8TCZ2-2;Q8TCZ2-3;Q8TCZ2-5	0	0	0	0	0	0.370407	0	0	1	0.159624	0.57261	0	0	0
A0A0U1RQW3;Q8WXE1;Q8WXE1-2
A0A0U1RQW6;E7EPU2;Q9Y2E4	0.859166	0.0596952	0.154648	0.0647893	0.210549	0	0.35342	0.310798	0.393182	1	0.375398	0.718809	0.416746	0.362906
A0A0U1RQY4	0	0	0	0	0.319271	0.682003	0.620509	0.827279	1	0.549123	0	0.927045	0	0
A0A0U1RR06;Q9Y484;Q9Y484-2;Q9Y484-3	1	0.642216	0.483695	0.424836	0.298718	0.303034	0.243228	0.166937	0.122229	0.0956691	0.303711	0.0370896	0.0254862	0
A0A0U1RR16;A0A3B3IRZ7;Q8NEY4;Q8NEY4-2	0.642383	1	0.633387	0.837846	0.646682	0.43895	0.337186	0.613171	0.405317	0.481979	0.560695	0.302917	0	0.0632122
A0A0U1RR25	0	1	0	0.175125	0	0	0	0	0	0.0326189	0	0	0	0
A0A0U1RR27;H3BTW5;Q7Z401;Q7Z401-2	0.308089	0.503656	1	0.738972	0.962618	0	0	0	0.186309	0	0	0	0	0
A0A0U1RR32;A0A0U1RRH7;P0C0S8;P20671;Q96KK5;Q99878;Q9BTM1	0.0560657	0.000432071	0	0.00172742	0.00425848	0.00753021	0.0219607	0.0343206	0.0560811	0.169844	0.198417	0.193159	0.159203	1
A0A0U1RR76;A6NJ78;A6NJ78-2;A6NJ78-4;P0C7V9	0	0	0	0	0	0	0	0	0	0	0.638806	0.904914	1	0.379635
A0A0U1RRA6;B5MCG9;B5MCU0;H7C0E9;Q9Y2K5	0.417718	1	0.60732	0.443648	0.654573	0.265144	0.167181	0.122488	0	0	0	0	0	0
A0A0U1RRB6;J3QT38;Q9Y2D4;Q9Y2D4-2	0.278965	0	0.222628	0.52359	0.253132	0.176496	0.272844	0.329822	0.646655	1	0.568829	0.677281	0.583493	0.836083
A0A0U1RRB9;F2Z2V1;Q96C11;Q96C11-3	0.777323	1	0.619861	0.42264	0.403106	0.194131	0.22876	0.150662	0.102779	0.140318	0.0433605	0.0371077	0.0804111	0
A0A0U1RRK1;A0A286YF11;F6XEV2;Q9BPX6;Q9BPX6-3	0	0	0	0	0	0	0.0865902	0.127012	0.356358	0.232412	0.524436	1	0.761419	0.610806
A0A0U1RRL7	0	0	0	0	0	0	0	0	0	0	0.288254	0.856014	1	0.795601
A0A0U1RRL8;Q8TB22;Q8TB22-2;Q8TB22-3	0.0299378	0.0754489	0.0810297	0.154506	0.11337	0.0484136	0.181411	0	0.131316	0.303788	0.364427	0.824773	1	0.628082
A0A0U1RRM1;Q8WXI9	0	0	0	0	0	0	0	0	0	0	0	0	0	1
A0A126GWB3;P47888
A0A126GWF9;A0A2C9F2Y1;B2RN74;Q8NG94;Q8NH07;Q8NH93	0	0	0	0	0	0	0	0	1	0.819266	0	0	0	0
A0A140LJL2;Q8N350	0	0	0	0	0	0	0	0	1	0	0	0	0	0
A0A140T8Y3;A0A140T902;A0A140T9C0;A0A140TA33;A0A140TA41;A0A140TA52;A0A3B3ISX9;P22105;P22105-1;P22105-4	0.0261503	0.040964	0.0940596	0.0642421	0.139244	0	0.102732	0.0902462	0.113825	0.112284	0.159475	0.269868	0.334031	1
A0A140T913;A0A140T933;A0A140T955;A0A140T9I0;A0A140T9X5;A0A1W2PRT9;Q53Z42	0.258388	0	0.0118799	0.0921105	0.16914	0.40511	0.618906	0.741898	1	0.91499	0.968825	0.707936	0.544667	0.869356
A0A140T951	0.207468	0	0	0	0.112038	0.199415	0.187863	0.332522	1	0.738989	0.346899	0.0469697	0	0.657115
A0A140T962;A0A140T9B3;A0A140T9J9;A0A1W2PR11;Q5QT33	0.146991	0	0	0.178997	0.282128	0.553825	0.498369	0.665431	0.803266	0.913114	1	0.87234	0.751633	0.773975
A0A140T9G8;Q0P5T2;Q5SQH8;Q5SQH8-2;Q5SQH8-4	0	0	0	0	0	0	0	0.0274574	0.0283646	0.168309	0.243522	1	0.598837	0.556138
A0A140T9T7;Q03518	0.106335	0	0	0	0.168256	0.162946	1	0.806794	0.86867	0.697806	0.743502	0.414275	0.454652	0.3185
A0A140TA01;E9PQT8;E9PQZ5;O43189;O43189-2	0	0	0	1	0.695922	0	0	0.488648	0.0539298	0	0	0	0	0.285511
A0A140TA09;Q99942	1	0.091765	0.496897	0.37817	0.490304	0.643038	0.68292	0.999263	0.251754	0.593044	0.352654	0	0.153996	0.237443
A0A140TA86;Q5XKP0	0	0	0	0	0	0	0	0.12852	0.18039	0.27956	0	0	1	0.556864
A0A182DWF2;A0A182DWF3;Q9NNW7;Q9NNW7-2	0.0872068	0.0858184	0.0720865	0.0376359	0.0140955	0.00670942	0	0.00480144	0.0263373	0.0745229	0.345324	0.904864	1	0.510588
A0A182DWH7;P49908	0	0.168568	0.106153	0.450968	0.309539	0.743628	0.556564	0.358287	0.768404	0.924117	0.660137	1	0.63927	0.39927
A0A182DWI4;E9PN30;Q9BQE4	0	0	0	0	0	0	0.516909	1	0.522981	0	0	0	0	0
A0A1B0GTB0;A0A1B0GTU8;A0A1B0GU12;A0A1B0GUT7;A0A1B0GVB9;A0A1B0GVC7;A0A1B0GVW0;A0A1B0GWJ8;A0A1C7CYW4;B7Z413;H7C3E1;O75787;O75787-2	0	0	0	0	0	0	0.354767	0.963207	1	0.743656	0	0	0	0
A0A1B0GTF3;A0A6I8PIT5;A0A6I8PIW1;A0A6I8PLB1;O43301	0	0	0	0	0	0	0	0	1	0	0	0	0	0
A0A1B0GTG2;A0A1B0GW77;P49419;P49419-2	0.180992	0.470002	0.457465	0.278033	0.379258	0.214903	0.0100342	0.0264233	0	0.0479054	0.344974	0.894657	1	0.659158
A0A1B0GTH8;A0A1B0GUV4	0	0	0	0	0	0	0	0	0	0.477719	0	1	0	0
A0A1B0GTJ7;A0A1B0GWJ0;P30566	0.697115	1	0.870563	0.441045	0.423971	0.316183	0.215604	0.144162	0.118219	0.0936328	0.0571117	0.0248072	0.0180266	0
A0A1B0GTJ8;A0A1B0GV63;A0A1B0GVK1;A0A1B0GWJ2;A0A3F2YNW7;A0A6Q8NVI4;H0Y7H8;Q8NFD5;Q8NFD5-2;Q8NFD5-3;Q8NFD5-4	0	0	0	0	0	0	0	0	0	0	0	0	0	1
A0A1B0GTK6	0.549511	0	0.926272	0.528848	1	0.429531	0.586953	0.464053	0	0	0	0	0	0
A0A1B0GTL7;A0A1W2PQ11;A0A1W2PQ86;A0A1W2PQJ4;Q02246	0	0	0	0.0685798	1	0	0	0	0.269768	0	0	0	0	0
A0A1B0GTM1;A0A1B0GUM5;E7ETX0;Q8NHX9
A0A1B0GTM3;A0A1B0GUA4;A0A1B0GUH5;A0A1B0GW68;Q13510;Q13510-2	0.219841	0	0.121212	0.100473	0.189799	0.30308	0.302646	0.617175	0.592616	0.468297	0.466828	0.448533	0.375363	1
A0A1B0GTT2	0	0	0	0	0	1	0	0	0.158093	0	0	0	0	0
A0A1B0GTU4	0.916306	1	0.244942	0.465209	0	0.148833	0.501055	0.136671	0.705547	0.785577	0.540257	0.697248	0.360952	0.136548
A0A1B0GTU5;H0Y488;O14497;O14497-2;O14497-3	0	0	0	0.367878	0.079572	0.590326	0.200731	0.0721661	0.0750197	0.0877346	0.181802	0.559205	0.237436	1
A0A1B0GTU7;H0YD36;P54098	0	0	0	0	0	0	0	0	0.0719991	0.248511	0.439721	1	0.689105	0.790124
A0A1B0GTV6	0	0	0	0	0	0	0	0	0.0837417	0	0	0	0	1
A0A1B0GTW1;A0A2R8YDH4;A0A3B3ITE1;Q9UDY2;Q9UDY2-3;Q9UDY2-7	0.365077	0.0647733	0	0.05877	0.043204	0.0365717	0.157259	0.252293	0.563742	0.57901	0.873734	0.658427	0.665984	1
A0A1B0GTX1;A0A1C7CYY6;Q6XZF7;Q6XZF7-2
A0A1B0GUA3;A0A6Q8PGG2;A0A6Q8PH45;A0A6Q8PHL8;Q96EK5	0	1	0	0	0	0	0	0	0	0	0	0	0	0
A0A1B0GUC2;A0A1W2PP33;C9J7I0	0.526551	0	0	0.759647	1	0	0	0	0	0	0	0	0	0
A0A1B0GUF4	0	0	0	0	0	0	0.729593	0.731421	1	0.679533	0	0	0	0.569082
A0A1B0GUG6;Q86WH2	0	0	0.877269	1	0	0.830329	0.437511	0	0	0	0	0	0	0
A0A1B0GUI1;Q6GYQ0;Q6GYQ0-2;Q6GYQ0-3;Q6GYQ0-4;Q6GYQ0-5;Q6GYQ0-6;Q6GYQ0-7
A0A1B0GUL3	0	0	0	0	0	0	0	0	0.584118	1	0	0	0	0
A0A1B0GUN5	0.312283	0.0444665	0.0175523	0	0.0253584	0.0467601	0.0294889	0.142253	0.469606	0.660509	0.732346	0.645307	0.392149	1
A0A1B0GUN9	0	0.685803	0.292275	0.25963	1	0.0239986	0	0.0226132	0.330772	0.0866449	0.135143	0.106244	0.135896	0.227531
A0A1B0GUS7	0.146483	0	0.33267	1	0	0.137642	0.172046	0.0547253	0.502761	0.0160137	0	0	0	0
A0A1B0GUZ2;P00797;P00797-2
A0A1B0GUZ7;Q14156;Q14156-2	0.0753322	0	0	0.0831123	0	0.0280599	0.227569	0.323793	0.578255	0.941497	0.790218	0.504736	0.412023	1
A0A1B0GV26;Q8WWZ3;Q8WWZ3-2	0	0.30349	1	0	0	0	0.222836	0.358118	0	0	0	0	0	0
A0A1B0GV47;Q7Z4S6;Q7Z4S6-2;Q7Z4S6-4;Q7Z4S6-5;Q7Z4S6-6	0.72995	1	0.825749	0.755782	0.472324	0.273975	0.566922	0.353314	0.212989	0.379812	0.507914	0.321596	0	0.325902
A0A1B0GV57;Q9NYJ8	0	0	0	1	0	0	0	0	0	0	0	0	0	0
A0A1B0GV71;A0A1B0GW34;A0A1B0GWD3;B4DFF3;H3BNK7;H3BR00;O95086;Q13286;Q13286-2;Q13286-3;Q13286-4;Q13286-5;Q13286-7;Q2TA70;Q9UBD8	0	0	0	0	0	0	1	0	0.407105	0.412795	0.132059	0.0627749	0	0.376444
A0A1B0GVD5;A0A1B0GVP3;A0A1B0GW44;A0A1B0GWE8;P07339	0.193805	0	0.139421	0.132722	0.303934	0.62085	0.72681	1	0.735862	0.520435	0.360199	0.349184	0.252635	0.361342
A0A1B0GVG4	0	0	0	0	1	0	0	0	0	0	0	0	0	0
A0A1B0GVI7;A0A2R8Y7G1;P35869	0.894844	1	0.686016	0.616218	0.978762	0.546682	0.413302	0.361333	0.241223	0.649099	0.285145	0	0	0.608757
A0A1B0GVL3;Q05086;Q05086-2;Q05086-3	0.47946	0.586526	1	0.759925	0.626511	0.330813	0.315604	0.166021	0.105252	0.113139	0.0490861	0.0947697	0	0.0124323
A0A1B0GVV3;Q5EBL4	0.601115	1	0.690998	0.600499	0.443394	0.408275	0.13286	0.310907	0.225622	0.126497	0	0	0	0
A0A1B0GVV8	0	0.747878	0	1	0	0.649487	0.77243	0.78248	0.800712	0.356831	0	0.159958	0.291051	0.0620976
A0A1B0GW05	0.503129	0	0.871133	0	0.0794075	1	0.187104	0.344683	0.477385	0.204692	0.255444	0.217781	0.230213	0.211956
A0A1B0GW23;Q03154	0.594477	1	0.74076	0.615381	0.682101	0.339519	0.192756	0.14267	0.0891294	0.085173	0.0566041	0.0239026	0.0265051	0
A0A1B0GW38	1	0.700298	0.521512	0.543443	0.687365	0.816596	0.301871	0.599617	0	0	0.393006	0	0	0
A0A1B0GW41;E9PEN0;Q8WYH8;Q8WYH8-2	0	0	0	0	0	0	0	0	0	0	0	0	0	1
A0A1B0GWB2
A0A1B0GWD8;Q9C093-4	0	0	0	0	0	0	1	0	0	0	0	0	0	0
A0A1B0GWI2;O75503	0.138448	0	0	0.0692302	0.0645937	0.291597	0.261291	0.223419	0.272759	0.294883	0.672844	1	0.515533	0.854587
A0A1B0GXA9;C9JHJ7;Q04771	0	0	0	0	0	0	0	0	1	0	0	0	0	0
A0A1B1UZQ1;A0A3B3IRU7;A0A3B3ISJ6;A0A3F2YP58;A0A5F9ZHF9;A0A5F9ZI67;Q9Y233;Q9Y233-2	0	0	1	0	0	0	0	0	0.194983	0	0	0	0	0
A0A1C7CYW7
A0A1C7CYX0	0	0	0	0.170342	0	0	0.467124	0.550314	1	0.668239	0.496429	0.402182	0.631408	0.617477
A0A1C7CYX8	0	0	0	1	0	0	0	0	0	0	0	0	0	0
A0A1C7CYX9	0.591393	1	0.788974	0.661824	0.495538	0.367619	0.218033	0.191205	0.165745	0.161983	0.0518692	0.0556731	0.0150615	0
A0A1C7CYY4;I3L1K6;I3L532;P12829
A0A1D5RMN4;P23945;P23945-2;P23945-4	0	0	0	0.0984161	0.0850787	0.295262	0.422158	0.48677	0.54191	0.577914	0.385092	0.666498	1	0
A0A1P0AYU5;Q9BWM7	0	0	0	0	0	0	0.224728	0.167829	0.223676	0.364385	0.418301	0.669019	1	0.604844
A0A1W2PNF0;A0A1W2PNY6;A0A1W2PPE6;A0A1W2PPG9;A0A1W2PPH4;A0A1W2PQ13;A0A1W2PQ60;A0A1W2PQD6;A0A1W2PQH2;A0A1W2PQL8;A0A1W2PR66;A0A1W2PRN3;A0A1W2PRT7;A0A1W2PS45;A0A1W2PS77;A0A1W2PSA9;A0A1W2PSD1;Q9Y2D2;Q9Y2D2-2;Q9Y2D2-3	0.162316	0	0	0.0830133	0.095881	0.179493	0.315192	0.336013	0.418301	0.380029	0.313533	0.957188	1	0.634261
A0A1W2PNH8;A0A1W2PNQ8;A0A1W2PNR0;A0A1W2PNW5;A0A1W2PPB6;A0A1W2PPR7;A0A1W2PQA9;A0A1W2PQP4;A0A1W2PQZ1;A0A1W2PS19;K7ELE1;K7EPJ2;O95427	0	0	0	0	0	0	0	0	1	0.0948165	0	0	0	0
A0A1W2PNP0;Q969N2;Q969N2-5	0.080558	0	0	0.153801	0.387477	0.25769	0.99168	1	0.84248	0.830507	0.648476	0.893538	0.892872	0.759923
A0A1W2PNR9;Q9Y5U9	0	0	0	0.0303887	0.298464	0.453229	0.729666	1	0.662925	0.502021	0.378583	0.384667	0.380884	0.384086
A0A1W2PNT1	0	0	0	0	0	0	1	0	0	0	0	0	0	0
A0A1W2PNU4;A0A286YES2;F8VYC4;P0DJD0;P0DJD1	0	0	0	0	0	0	0	0	0	1	0	0	0	0
A0A1W2PNV4	0.572115	1	0.73444	0.684509	0.344299	0.226502	0.344346	0.219747	0.298208	0.289195	0.0701047	0.112378	0.0977321	0
A0A1W2PNW1;A0A494C0T4;H0YJH6;P42226;P42226-3	0.699484	1	0.903428	0.536187	0.460226	0.375638	0.286033	0.288573	0.242602	0.19717	0	0	0	0.600499
A0A1W2PNX8;Q9H3U1;Q9H3U1-2	0.410288	1	0.728224	0.309071	0.316152	0.162472	0.130568	0.14914	0	0.0858155	0.0497352	0.0108844	0.0212315	0.0365509
A0A1W2PNY5;A0A1W2PPP6;A0A1W2PQA7;A0A1W2PQZ6;A0A1W2PR08;A0A1W2PRF0;A0A1W2PRF5;A0A1W2PRJ0;A0A1W2PS93;A0A1X7SBS0;G5E9D4;Q96EB1;Q96EB1-2;Q96EB1-3	0	0	0.743467	1	0.689954	0.564293	0.679443	0.234555	0	0	0	0	0	0
A0A1W2PP04;Q5JY83;Q9Y388	0	0	0	0	0	0	0	0	0	0	0	0	0	1
A0A1W2PP11;Q9H300	0	0	0.320063	0	0	0	0.0768675	0.201332	0.142663	0.449914	0.530312	1	0.904347	0.56467
A0A1W2PPB5;Q13873;Q13873-2	0	0	0	0	0	0	0	1	0	0	0	0	0	0
A0A1W2PPB7;E9PH70;H0Y8E4;Q9ULH0;Q9ULH0-2;Q9ULH0-4	0	0	0	0	0	0	0.493801	0.682851	0.663358	1	0.641093	0.924906	0	0.708583
A0A1W2PPC6;Q9H3H5;Q9H3H5-2	0.219423	0	0	0.0757053	0.155644	0.202626	0.677625	1	0.482678	0.520288	0.494844	0.732013	0.685191	0.240352
A0A1W2PPD8
A0A1W2PPH1;P23368	0.104182	0.115665	0.0818714	0.0551536	0.0357019	0.0143474	0.0153642	0	0.0911148	0.116755	0.396575	1	0.956701	0.638046
A0A1W2PPH6	0.231649	0	0	0	0	0	0	0.107093	0	0	0	0.503316	0	1
A0A1W2PPI5;Q5JSJ4	0	0	0	0	0	0	1	0.876605	0.893536	0.747584	0	0	0	0
A0A1W2PPJ5;J3QT51;J3QT87;Q96SW2;Q96SW2-2	0	0.336746	1	0	0.0209798	0.282584	0	0	0	0	0	0	0	0
A0A1W2PPS1;Q00839;Q00839-2	0	0.205624	0.329942	0.135137	0.294523	0.19419	0.101661	0.259307	0.0888755	0.120607	0.0121617	0.159744	0.329553	1
A0A1W2PPT3;P52740;P52740-2
A0A1W2PPV0;A0A1W2PQG5;Q9Y5P2;Q9Y5P2-2	0.527056	0	0	0	0	0	0.849918	1	0.419426	0	0	0	0	0
A0A1W2PPZ5;P23193	0.505145	1	0.603008	0.380499	0.292391	0.394682	0.0897017	0.252713	0.0896866	0.173468	0.0997191	0	0.0898273	0.12349
A0A1W2PQ75;O15488;O15488-2;O15488-3;O15488-4;O15488-6	0.0159638	0	0	0.0554982	0	0.0451013	0.100127	0.065019	0.105817	0.146386	0.138047	0.224709	0.390136	1
A0A1W2PQD2;Q9UBB4	0.875038	1	0.649824	0.519529	0.62671	0.553349	0.326585	0.381444	0.453187	0.0984676	0	0.669388	0	0
A0A1W2PQE7	0	0	0	0	0	0	0	0	0	0.59437	0	0	1	0
A0A1W2PQM2	0.139697	0.482298	1	0.507868	0.908291	0.588234	0.480617	0.287443	0.181596	0.258751	0.157328	0.103532	0.127731	0
A0A1W2PQM3	0.134352	0	0.041771	0.12109	0.232692	0.709199	1	0.62548	0.586979	0.436094	0.35891	0.394837	0.345454	0.371852
A0A1W2PQM5;A0A1W2PR19;A0A1W2PRG0	0	0	0	0	0	0	0	0	0.73186	1	0	0.305752	0	0
A0A1W2PQN4	0	0	0	0	0	0	0	0	0	1	0	0	0	0
A0A1W2PQP6;Q9BWL3;Q9BWL3-2;Q9BWL3-3;Q9BWL3-4;Q9BWL3-5;X6R6F3;X6R6S3	0	0	0	0	0	0	0.375314	0.987967	1	0.705509	0.981359	0	0	0
A0A1W2PQQ5
A0A1W2PQS6	0.00925894	0	0.0665592	0.101704	0.0954476	0.168475	0.233742	0.218711	0.265986	0.48279	0.404395	1	0.952691	0.52884
A0A1W2PR09;A0A1W2PRL5;A0A1W2PRM0;F5GYH1;Q8NC96	0.475118	0.376477	0.496229	0.559966	0.440931	1	0.921765	0.514721	0.808289	0.352666	0.18507	0.0331761	0	0
A0A1W2PR17;F2Z2I2;Q16875;Q16875-2;Q16875-3;Q16875-4;Q5VX20;Q5W015	0.572727	1	0.580035	0.413759	0.392457	0.201137	0	0	0	0	0	0	0	0
A0A1W2PR28;A0A1W2PRJ5;A0A6Q8PFR7;Q5JU85;Q5JU85-3	0	0	1	0.940618	0	0	0	0	0	0	0	0	0	0
A0A1W2PR41;Q9Y6Q6;Q9Y6Q6-2;Q9Y6Q6-3;Q9Y6Q6-4;Q9Y6Q6-5	0	0.767471	0.985994	0.324934	1	0.730069	0	0.730757	0.647776	0.874431	0.875477	0	0	0
A0A1W2PR46;A0A1X7SBR3;P14136;P14136-2;P14136-3	0	0	0.361699	0	0	0	0.3243	0	0.0374405	0	0.0380552	0.379302	0.200878	1
A0A1W2PRB8	0	0	0	0	0	0	0	0	0	0	0.178493	0	0	1
A0A1W2PRI9;E9PNW5	0	0	0	0	0	0	0.751931	0.708605	0.652765	0.556205	0.283629	1	0.48226	0.355404
A0A1W2PRV5;E7EQZ4;Q16637;Q16637-2;Q16637-3;Q16637-4	0	0	0	0	0	0	0	0	1	0	0	0	0	0
A0A1W2PRW4;P53816	0.885019	1	0.607247	0.717453	0.613926	0.318682	0.258405	0.520778	0.578767	0.535041	0.93179	0	0	0
A0A1W2PS02	1	0	0	0	0	0	0	0	0	0	0	0	0	0
A0A1W2PS05;Q8NEB9	0.495499	1	0.877863	0.803308	0.828753	0.554612	0.238165	0.317708	0.34193	0.592432	0	0.0524536	0.0813406	0.0453181
A0A1W2PS43;Q14108	0.222466	0	0.156383	0.347368	0.408441	0.608513	0.801746	1	0.68327	0.524159	0.317697	0.222461	0.138549	0.272088
A0A1W2PS52
A0A1X7SBT1;Q9H1D0;Q9H1D0-2	1	0.429693	0.283341	0	0	0	0	0	0	0	0.0902156	0	0.335371	0.82605
A0A1X7SBT7;O95502	0	0	0	0	0	1	0	0	0	0	0	0	0	0
A0A1X7SBY3;H0Y860;Q9P246;Q9P246-2	0	0	0	0	0	0	0.654166	0	0	1	0	0	0	0
A0A1X7SBZ2;A0A5H1ZRQ2;Q92841	0.0218	0	0.0503126	0.126745	0.159777	0.220492	0.239744	0.286132	0.313283	0.401511	0.387188	0.548356	0.49386	1
A0A1Y0BRN3;A0A590UJ40	0.66604	1	0.423488	0.27566	0.20577	0.0918574	0.298134	0.342411	0.425841	0.407685	0.3618	0.303274	0	0.465065
A0A286YEV4;A0A286YEV9;A0A286YEW8;A0A286YEX1;A0A286YF00;A0A286YF45;A0A286YF51;A0A286YF73;A0A286YFC6;A0A286YFE7;A0A286YFF5;A0A286YFH9;A0A286YFM2;B7Z2B2;E7ERQ4;Q8NHS3	0	0	0	0	0	0	1	0	0	0	0	0	0	0
A0A286YEX4;P08651;P08651-5;P08651-6	0.100358	0	0.00682568	0.0464139	0.0472491	0.0419835	0.0939492	0.161601	0.279071	0.253564	0.25662	0.250599	0.310751	1
A0A286YF17;A0A286YFD0;P42898;P42898-2;Q5SNW7	0.650675	1	0.727342	0.454899	0.358451	0.120358	0	0	0	0	0	0	0	0
A0A286YF22;O43175	0.571255	1	0.790389	0.585358	0.478556	0.362278	0.214711	0.180066	0.121411	0.0961816	0.0618089	0.0187532	0.0174886	0
A0A286YF37;Q9UK22	0.390592	0.584478	1	0.649287	0.815824	0.614487	0.199332	0.0843716	0.12652	0.054614	0.00377143	0.00882441	0	0.235721
A0A286YF93	0	0	0	0	0	0	0	0	0	0	0.451958	1	0.617389	0.0735473
A0A286YFA5;Q8NGQ1	0	0	0	0	0	0	0	1	0	0.790052	0	0	0	0
A0A286YFE3;A0A286YFF7;A0A286YFL8;A0A2C9F2P4;P50897;Q5T0S4	0.331354	0	0.2629	0.197252	0.231784	0.656408	0.927969	0.999027	1	0.580562	0.639394	0.385467	0.354148	0.657602
A0A286YFF8;Q7Z3U7;Q7Z3U7-2;Q7Z3U7-5;Q7Z3U7-6	0.510496	1	0.673807	0.580925	0.454467	0.347186	0.267527	0.194545	0.105312	0.200095	0.00928726	0.0225427	0.0847046	0
A0A2Q2TTZ9;P01593;P01594	0	0	0	0	0	0	0	0	0	0	0	0	0	1
A0A2Q3DQE3;Q13555;Q13555-10;Q13555-11;Q13555-2;Q13555-3;Q13555-4;Q13555-5;Q13555-6;Q13555-7;Q13555-8;Q13555-9;Q5SWX3;Q8WU40	0	0	0	0	0	0	1	0.727654	0.779906	0.577614	0.3104	0	0	0.710143
A0A2R8Y2A8	0.749029	1	0.504994	0.249348	0.364572	0.396962	0.12827	0.0471538	0	0.0971887	0.186577	0	0.665942	0.0921507
A0A2R8Y2F6;P42336	1	0.709854	0.49791	0.285312	0.318437	0.233129	0	0.00951604	0.113269	0.0541695	0.908947	0.0372266	0.0980347	0.348876
A0A2R8Y3M9	0.202468	0	0.0817902	0.127278	0.236826	0.469691	0.76847	1	0.842242	0.508414	0.432035	0.286659	0.490892	0.224473
A0A2R8Y3N3;A0A2R8Y5P7;A0A2R8Y6I1;P49590;P49590-2	0	0	0.137736	0	0	0.284837	0	0	0.239402	0.118319	0.502711	0.928806	1	0.732737
A0A2R8Y3S0;A0A2R8Y511;A0A2R8YCL0;Q96JX3	0	0	0	0	0	0	0	0.0253585	0.123003	0.226192	0.393787	0.81707	1	0.57835
A0A2R8Y440;A0A2R8Y4P4;A0A2R8Y7S2;A0A2R8YG32;A0A2R8YGG3;P51532;P51532-2;P51532-3;P51532-4;P51532-5;Q9HBD4	0.0803879	0.0061423	0.0209279	0.0308015	0	0.000537217	0.0272971	0.0189468	0.0505431	0.0924226	0.099497	0.196235	0.115989	1
A0A2R8Y455;A0A2R8Y600;A0A2R8Y620;A0A2R8Y7U2;Q86VX2;Q86VX2-2	0.715276	0.428534	0.996156	0.710749	0.803149	1	0.734162	0.785522	0.477639	0.470617	0.0448164	0	0	0.273183
A0A2R8Y471;Q12967;Q12967-2;Q12967-3;Q12967-4;Q12967-5;Q12967-6;Q5T7U6	0	0	0	0	0	0.0151583	0.0888626	0.433076	0.597589	0.18812	0.756318	1	0.631707	0.694483
A0A2R8Y478;A6NNI4;G8JLH6;P21926	0	0	0	0	0	0	0.154952	0.302437	0.677516	1	0	0.191425	0	0
A0A2R8Y484;Q08722;Q08722-2;Q08722-3;Q08722-4	0	0	0	0	0	0	0	0	1	0	0	0	0	0
A0A2R8Y491;E7EWD9;O95718;O95718-1;O95718-2	0.351426	0.244354	0.429458	0	0	0	0	0.0279632	0.0980025	0.0977804	0.103342	0	0.121364	1
A0A2R8Y4C2;A0A2R8Y596;A0A2R8Y5C9;A0A2R8Y5E4;A0A2R8Y6M6;A0A2R8Y8C4;A0A2R8YFK2;A0A2R8YFS8;P56945;P56945-2;P56945-3;P56945-4;P56945-5;P56945-6;P56945-7;P56945-8	0.296125	0.711217	0.487016	0.318084	1	0	0	0	0	0	0	0	0	0
A0A2R8Y4F5	0.101309	0	1	0	0	0	0	0.126695	0.59384	0.713577	0	0	0	0
A0A2R8Y4I8;A0A2R8Y7K2;A0A2U3TZR0;Q9UBP0;Q9UBP0-2;Q9UBP0-3;Q9UBP0-4	0	0.661596	0.768535	0.36409	0.596739	0.842421	0.553307	0.658468	0.808382	0.699708	0.990044	0.940092	1	0.380205
A0A2R8Y4K2;Q9Y2S2	0.62503	1	0.544094	0.338357	0.338434	0.163992	0.137776	0.106228	0.0610726	0.0438752	0.0180342	0.00730583	0.00812184	0
A0A2R8Y4M1;A0A2R8Y615;A0A2R8YGW2;A0A5F9ZHK1;Q9NZA1;Q9NZA1-2;Q9NZA1-3	0	0	0	0	0	0	0	0	0.708554	0	0	0	0	1
A0A2R8Y4T1	0.305954	0.147708	0.0572981	0	0.0449434	0.036193	0.179936	0.237864	0.546352	0.896862	0.859968	0.591639	0.586722	1
A0A2R8Y4U1;A0A2R8YDF7;O75164	0	0	0	0	0	0	0	0	0	0	0	0	0	1
A0A2R8Y4U4	0	0	0	0	0	0	0	0	0	1	0	0	0	0
A0A2R8Y4V0;A0A2R8Y4Z4;A0A2R8Y5D8;A0A2R8Y6Q0;A0A2R8YDG0;Q09428;Q09428-2	0	0	0	0	0	0	0.115569	0	0.213776	0.318978	0.448776	1	0.808612	0.469367
A0A2R8Y4W0	0	0	0	0	0	0	0	0	0.72622	1	0.596644	0.0573336	0	0
A0A2R8Y4W1;A0A2R8Y860;A0A2R8YD46;A0A2R8YFE3;A0A2U3TZS7;P43004;P43004-2	0.339179	0	0.0457245	0.0717535	0.128317	0.258342	0.474855	0.780459	1	0.972393	0.778365	0.841387	0.536766	0.857758
A0A2R8Y4W2;A0A2R8YE63;Q12929	0.541856	0	0.405504	0.431934	0.186555	0.173709	0.276566	0.19327	0.450974	0.441564	0.284287	1	0.274135	0.922463
A0A2R8Y4Y7;A0A2R8YFW4;Q9UQ90	0.0508321	0	0.165378	0	0	0.0555405	0.0960806	0.144238	0.147202	0.297616	0.496811	1	0.823	0.541533
A0A2R8Y4Z0;A0A2R8Y7W5;A0A2R8YF61;Q14004;Q14004-2	0.423941	0.876175	0.421403	0.67078	0.561358	0.491634	0.346777	0.395586	0.303973	0.20644	0.21293	0	0.374082	1
A0A2R8Y4Z6;J3KMZ7;Q9H0H0	0	0	0	0	0	0.281092	0	0	0	0	0	0	0.408401	1
A0A2R8Y4Z8	0.386824	0.519432	0.677401	0.947276	0.35736	0.877159	0.83519	0.0794762	0.136925	0.236199	0.126276	0	0.102395	1
A0A2R8Y500;A0A2R8YFP1;A0A2U3TZI0;Q9BZR9;R4GN03	0	0	0	0	0	0	0	0	0.150366	0	0	0	0	1
A0A2R8Y524;A0A2R8YEC9;E9PFW2;O00462	0.386236	0	0.152549	0	0.257794	0.507965	0.418929	0.583433	0.635769	0.640764	0.653939	0.71915	0.660142	1
A0A2R8Y543;A0A2R8Y5A3;A0A2R8Y804;A0A2R8YCH5;B4DGU4;P35222	0.215971	0.010469	0.00494461	0	0.0316168	0.0486864	0.169811	0.252771	0.63161	0.865608	0.703976	0.531875	0.503172	1
A0A2R8Y544;Q9BR61	0.951681	1	0.448557	0.433952	0.822659	0	0	0	0	0	0	0	0	0
A0A2R8Y549;Q8NI35;Q8NI35-2;Q8NI35-3;Q8NI35-4	0.500728	1	0.247589	0.123371	0.159544	0.159435	0.104624	0.0263673	0.15302	0	0.139745	0.0951151	0.354681	0.553406
A0A2R8Y566;Q9P260-2	0.573504	1	0.831139	0.786454	0.450437	0.42012	0.342062	0.308967	0.150724	0.334258	0.160594	0.0332905	0.152175	0
A0A2R8Y595;A0A2R8YFL0;P49711	0	0	0	0	0	0	0	0.0263046	0.0169098	0.103309	0.0739107	0.15225	0.0774135	1
A0A2R8Y5A0;A0A2R8YD58;E7EU96;P68400	0.214908	0.552206	0.674196	0.61043	0.110743	0.169971	0.0680708	0.00105645	0.0717382	0.193347	0	0.321763	0.184821	1
A0A2R8Y5D3;A0A2R8YEZ4;O15160;O15160-2	0.442141	0.480014	0.513536	0.512779	0.40056	0.426106	0.370701	0.276662	0.366973	0	0.199281	0	0	1
A0A2R8Y5F1;A0A2R8Y7C8;A0A2R8Y7X5;A0A2R8YDR3;A0A2R8YDZ2;A0A2R8YGD6;A0A2R8YGU4;H3BMQ0;P49815;P49815-2;P49815-3;P49815-4;P49815-5;P49815-6;P49815-7;X5D2U8	0.354399	0.421933	0.628786	0.52819	0.400501	0.249096	0.205706	0.211788	0.199375	0.155548	0.0766997	0	0	1
A0A2R8Y5J4;Q9BYG8
A0A2R8Y5K2;Q96LT7	0	0	1	0	0	0	0.634993	0.822535	0.736748	0	0	0.578855	0	0
A0A2R8Y5N2;A0A2R8Y5S3;A0A2R8YFV7;Q92574;Q92574-2	0.389665	0	0.944426	1	0.689677	0.883792	0.441491	0.445122	0.395514	0.463593	0	0	0	0.819139
A0A2R8Y5P9;Q8TF72	0	0	0	0.388193	0.416319	0.132688	0	0	0.298349	1	0	0	0	0
A0A2R8Y5Q1;A0A2R8Y7P3;A0A590UJ80;F5GWL1;F5H0I3;F5H876;G3V0H1;I3L0A5;P35711;P35711-2;P35711-4;P35711-5	0	0	0	0	0	0	0	0	0	0	1	0	0	0
A0A2R8Y5Q8;A0A2R8YHI9;Q15813;Q15813-2	0.767941	1	0.630579	0.574895	0.304115	0.279064	0.0834518	0.16442	0.0709523	0.0126305	0.0896358	0.0783297	0.123529	0
A0A2R8Y5Y7;D6RAN4;P32969	0.0727411	0	0.112019	0.180907	0.11358	0.252153	0.309189	0.368756	0.537803	0.54946	0.549404	1	0.855251	0.606748
A0A2R8Y605	1	0.640743	0.148367	0.0611547	0	0.50095	0.45073	0.206798	0	0	0	0	0	0
A0A2R8Y635;A0A2R8YDN7;Q9H7F0;Q9H7F0-2	0	0	0	0	0	0	0	0.511448	1	0	0	0	0	0
A0A2R8Y640	0	0	0	0	0	0.140773	0.184829	0	0.414771	0.382742	0	0	0	1
A0A2R8Y648	1	0.697974	0.714678	0.416321	0.497332	0.175232	0	0.0374485	0	0	0	0	0	0
A0A2R8Y651;Q8TF64	0	1	0.53815	0.794988	0.0670048	0.133263	0	0	0	0	0	0	0	0
A0A2R8Y653;Q9BZX2	0.684547	1	0.461684	0.266438	0.42013	0	0.0711826	0.251075	0.299943	0.040643	0.595168	0.277352	0.0551985	0.616143
A0A2R8Y661;A0A2R8YGD3;Q9Y4G8	0.367537	1	0.524958	0.503408	0.319167	0.326115	0.12254	0.214754	0.206541	0.24401	0	0	0	0
A0A2R8Y6D0	0	0	0	0	0	0	0	0.600042	0.600511	0.902981	0.235876	0	0	1
A0A2R8Y6I6;A0A2R8Y6L5;A0A2R8YDF3;Q13627;Q13627-2;Q13627-3;Q13627-4;Q13627-5	0	0.356273	0.263365	0.47451	0.418211	0.653751	0.324524	0.531839	0.524015	0.547989	0	0.233003	0.491928	1
A0A2R8Y6K8;Q7Z5P9;Q7Z5P9-2
A0A2R8Y6P2;A0A2R8YDC4;A6NFE3;C9J654;J3KR48;J3KR52	0	1	0	0.990669	0	0.883874	0.798286	0.729734	0	0	0	0	0	0
A0A2R8Y6W8;P19447	0	0	0	0	0	0	0	0.0274774	0.203832	0.26837	0.240493	0	0	1
A0A2R8Y6Y7;A0A2R8YDQ9;Q9P2R7;Q9P2R7-2	0.161177	0.102781	0.0688393	0.0286408	0.00823287	0.00785517	0	0.00869971	0.043935	0.108909	0.452039	0.969882	1	0.551841
A0A2R8Y783	0.166703	0	0	0	0.19739	0	0.0618006	0.204056	0.376328	0.271651	0.235432	0	0.110731	1
A0A2R8Y7B4	1	0	0	0	0	0	0	0	0	0	0	0	0	0.527307
A0A2R8Y7D5
A0A2R8Y7E6;A0A5F9ZHX3;A0A5F9ZI57	0	0	0	0	0	0.652696	0.450944	0.483981	0.232148	0.783909	0.345205	0.82419	1	0
A0A2R8Y7I9;A0A2R8Y855;A0A2U3TZQ7;B4DGM3;J3QKS7;Q969G3;Q969G3-2;Q969G3-4;Q969G3-5	0.0426549	0.0541243	0.0369933	0.0702226	0.0837907	0.0245442	0	0.0126405	0.0160166	0.0376573	0.0877943	0.125458	0.114294	1
A0A2R8Y7P6;A0A5F9ZHW5;F8VQP2;Q99700;Q99700-4;V9GY86	0	0.504017	0.641204	0.369777	0.399183	0.57256	0.500829	0.503106	0.774517	0.670086	0.8498	1	0.829115	0.395986
A0A2R8Y7Q1;E7ETD6;E9PE19;F5GXF5;Q12830;Q12830-2;Q12830-4	0	0	0	0	0	0	0	0	0	0	0	0	0	1
A0A2R8Y7R4;B2RUZ4;H3BS66	0.219161	0	0.273116	0.416245	0.546715	1	0.589216	0.407721	0.428369	0.549228	0.671298	0.565913	0.410444	0.984503
A0A2R8Y7T6;A0A3B3IRZ4;Q6DN90;Q6DN90-3	0.733538	1	0.692648	0.568749	0.596533	0.449308	0.255616	0.235892	0.257828	0.298776	0.0541962	0.242042	0	0.294949
A0A2R8Y7U0;H0Y770;O75140;O75140-1;O75140-4;O75140-9	0	0	0	0.249922	0.306365	0.363733	0.483149	0.490484	0.559017	0.851807	0.44093	0.644251	1	0.210175
A0A2R8Y7V5;H0Y850;P38398;P38398-4;P38398-7;P38398-8;Q5YLB2
A0A2R8Y7X9;P69891;P69892	0	0	0	0	0	0	0	0	1	0	0	0	0	0
A0A2R8Y7Y4;Q8N8A2;Q8N8A2-2;Q8N8A2-4	0.693108	1	0.785929	0.719086	0.52212	0.327384	0.382712	0.146972	0.376347	0.185282	0	0	0	0
A0A2R8Y811;P62263	0.0648232	0	0.152715	0.225908	0.16113	0.274979	0.385611	0.431567	0.539806	0.641988	0.63651	1	0.911286	0.640226
A0A2R8Y840;Q9HCK8;Q9HCK8-2	0	0	0	0	0	0	0	0	0.0987962	0.0734569	0.152165	0	0.0678871	1
A0A2R8Y849;A0A2R8Y8A0;A0A2R8YD14;E7ETK0;P62847;P62847-2;P62847-3;P62847-4	0	0	0.140049	0.208127	0.312202	0.350929	0.356016	0.740186	0.756459	1	0.868288	0.942532	0.927409	0.806846
A0A2R8Y851;P62273;P62273-2	0	0	0.0586036	0.0908595	0.0427807	0.105138	0.220697	0.217102	0.321675	0.415163	0.497476	1	0.758495	0.473962
A0A2R8Y852;A0A2R8YDI1;P39880;P39880-2;P39880-3;P39880-4;P39880-5;P39880-6	1	0.789525	0.278937	0	0.623574	0.280584	0	0	0	0	0	0	0	0
A0A2R8Y880;Q7Z6E9;Q7Z6E9-2	0	0	0	0	0	0	0	0	0.112917	0.145368	0	0	0	1
A0A2R8Y8E0;A0A2U3TZI2;H7C560;P15056	0.599051	1	0.656147	0.559792	0.658908	0.360355	0.192088	0.178789	0	0	0	0	0	0
A0A2R8YCJ8;Q5T2H3;Q9NVV5;Q9NVV5-1;Q9NVV5-3	0.0607559	0	0.0422053	0.121734	0.226797	0.416996	0.794547	1	0.652468	0.641803	0.445565	0.486818	0.50492	0.287403
A0A2R8YCL1;Q13322;Q13322-3;Q13322-4	0.427517	0.684192	0.0678878	0.59654	0.283671	0	0.393263	0.428941	0.1929	0.429924	0.22479	0.205464	1	0.535112
A0A2R8YCS7;Q9Y3Z3	0.419762	1	0.550353	0.611654	0.419038	0.181532	0.270164	0.268571	0.130977	0.196043	0	0.01803	0.0578317	0.0274809
A0A2R8YD30;P11171;P11171-2;P11171-3;P11171-4;Q4VB86	0.623324	0.236363	0.0755749	0.0398393	0.144223	0	0.0737252	0.415032	1	0.654666	0.941197	0.597546	0.51481	0.782197
A0A2R8YD49;A0A2R8YDU7;A0A2R8YEX0;Q9H1P3;Q9H1P3-2	0	0	0	0	0	0	1	0	0	0.359834	0	0	0	0
A0A2R8YD63;Q92547	0.48312	1	0	0.517971	0.635875	0	0.161182	0.145207	0.153452	0	0	0	0	0
A0A2R8YDB8;H7BXF5;Q9H0E3;Q9H0E3-3	0.214156	0.271002	0	0.350329	0.201509	0.227891	0.388935	0.181369	0.433152	0.0836993	0	0.192875	1	0.981477
A0A2R8YDC7;A0A2R8YE40;A0A2R8YF99;A0A2R8YFQ8;A0A2R8YGK2;F8W7S1;Q8NAN2;Q8NAN2-2	0	0	0	0	0	0.318901	1	0	0	0	0	0	0.568911	0
A0A2R8YDD5;P30531	0.282848	0	0	0.160495	0.143163	0.226705	0.375744	0.565252	1	0.669709	0.509327	0.421994	0.321055	0.712689
A0A2R8YDL0;O75443
A0A2R8YDQ0;Q9H267	0.542606	1	0.430415	0.772324	0.497623	0.762465	0.52785	0.522738	0.320587	0.447406	0.343167	0	0.120178	0.238971
A0A2R8YDT1;P15104	0.39262	0.63227	1	0.70243	0.648351	0.473883	0.262839	0.217305	0.180295	0.1213	0.0930222	0.0527761	0.0414669	0
A0A2R8YE10;Q9NRW7	0.175532	0.0170766	0	0.126533	0.38454	0.48537	1	0.675508	0.463731	0.717647	0.266511	0.273219	0.175812	0.278954
A0A2R8YE69;P0CG41;Q8IX94	0.462665	0	0	1	0	0	0.511229	0.366539	0	0	0	0.258043	0	0.20022
A0A2R8YE77;A0A2U3TZM1;O14936;O14936-3	0.321676	0.0583267	0.0890991	0.0351049	0	0.0620482	0.283653	0.369338	0.808459	1	0.790966	0.940033	0.647236	0.919581
A0A2R8YEA1;B5MCJ9;O15016;O15016-2	0	0	0	1	0	0	0	0	0	0	0	0	0	0
A0A2R8YEH1	1	0.368146	0.519774	0.448949	0.407218	0.0988734	0	0	0	0	0	0	0	0
A0A2R8YEI5;P52757;P52757-9	0.463166	1	0.623145	0.753677	0.654257	0.641133	0.612671	0.345217	0.279597	0.333572	0.260787	0	0	0
A0A2R8YEL6
A0A2R8YEM2;D6RG18;D6RHI7;P51946	0	0	0	0	0	0	0.0454873	0	0	0	0.0597039	0	0.660654	1
A0A2R8YEM9;O15050	1	0.912386	0.31854	0	0.77389	0.562291	0.130181	0	0	0	0	0	0	0
A0A2R8YEZ0;B7WP89;Q0P651;Q0P651-2;Q0P651-3;Q0P651-4	0	0	0	0	0	0	0	0	0	0	0.450074	1	0.665471	0
A0A2R8YF49	0.395878	1	0.481061	0.610884	0.648811	0.319035	0.397203	0.00388579	0.265138	0.135959	0.120167	0.355658	0	0.22315
A0A2R8YF72;A0A3B3IRF0;A0A3B3IRT9;A0A3B3IRX5;A0A3B3ISI4;A0A3B3ISW5;A0A3B3ITJ8;A0A3B3ITL3;A0A3B3ITS6;A0A3B3IUE2;H7BYU4;Q9UL68;Q9UL68-4	0	0	0	0	0	0	0.0294838	0.0729936	0.178872	0.250644	0.784217	1	0.732348	0.307207
A0A2R8YFF1;Q8N302	0	1	0	0.789703	0	0.661716	0.536881	0	0	0	0	0	0.0533955	0
A0A2R8YFG2;Q96T66	0	0	0	0	0	0	0	0	0.162268	0.275355	0.350907	1	0.978831	0.581625
A0A2R8YFH5;Q15437	0.516628	0.841395	0.777414	1	0.700815	0.765464	0.799837	0.453027	0.327804	0.360097	0.124966	0.0237644	0.149381	0
A0A2R8YFL3
A0A2R8YFN3;A1Z1Q3;A1Z1Q3-1	0.737184	1	0.597823	0.315504	0.259992	0.220178	0.110545	0.100893	0.117773	0	0	0	0	0
A0A2R8YFW3;O60907;O60907-2	0.275607	1	0.441199	0.291834	0.237786	0.0930729	0.0485065	0	0.0587163	0.0627782	0.0596318	0.236567	0.760627	0.852285
A0A2R8YFX0;Q969X2;Q969X2-2	0	0	0	0.0672434	0.125603	0.66241	1	0.395833	0.259096	0.176859	0	0	0	0
A0A2R8YG42;B1ALK7;Q14155-1;Q14155-5	0.0504397	0.362854	1	0.984582	0.912852	0.506071	0.34814	0.398781	0.393961	0.448199	0.234236	0.191788	0	0.0328437
A0A2R8YGH5;H7C1E4;P61966	0.00422914	0.00598182	0.0426363	0.236538	0.870974	0.528602	1	0.858379	0.444112	0.301975	0.320001	0	0.00251803	0.0622636
A0A2R8YGW0;P51795;P51795-1	0	0	0	0	0	1	0	0	0.654173	0	0	0	0	0
A0A2R8YHG5;Q9BZV2	0.137212	0	0.634175	0	1	0.088191	0.2403	0.180492	0.335198	0.499173	0.345788	0.357228	0.191238	0.207949
A0A2U3TZH3;Q05639	0	0	0	0	0	0	1	0	0	0	0	0	0	0
A0A2U3TZK7	0.173685	0.154763	0.10552	0.146426	0.0463435	0.0449204	0.0542378	0.0675282	0.0858248	0.173537	0	0	1	0
A0A2U3TZL5;E9PNW4;P13987;P13987-2	0.498407	0	0.11815	0.214512	0.25468	0.258503	0.462176	0.516291	0.92768	0.541242	1	0.612736	0.522377	0.453013
A0A2U3TZN6	0	0	0	0	0	0	0.289636	0.878588	0.863754	1	0.581185	0.317499	0	0.224933
A0A2U3TZT9	0	0	0	0	0	0	0	0.791467	0	1	0	0	0	0
A0A2U3TZU2;P06744	0.549839	1	0.65057	0.538397	0.406414	0.286743	0.220013	0.156841	0.0937892	0.119612	0.0340983	0.0214546	0.0284719	0
A0A2U3TZV8;Q4KWH8;Q4KWH8-2;Q4KWH8-3;Q4KWH8-4	0	0	0	0	0.358515	0.441324	0.966293	0.756635	1	0.69277	0.692847	0.491898	0.350541	0.416936
A0A2Y9D025;P56556;R4GN43	0	0	0	0	0	0.0228613	0.147439	0.177113	0.26377	0.326192	0.47182	1	0.804759	0.633666
A0A384DVU0;Q8IY17;Q8IY17-2;Q8IY17-3	0.258014	0.124808	0	0.0334446	0.0799818	0.154315	1	0.762496	0.844735	0.805839	0.475922	0.484911	0.356528	0.398578
A0A3B3IQ51;P36980;P36980-2;V9GYE7	0	0	0	0	0	0.383975	0.602482	1	0.674128	0.443857	0.404385	0.461434	0.386527	0
A0A3B3IRE4;Q8TCE6;Q8TCE6-2	0	0	0.287873	0.354109	0.569094	0.593549	1	0.774979	0.452495	0.846555	0.204558	0	0	0.162804
A0A3B3IRH7;H7C083;Q8TDX9;Q8TDX9-2	0	0	0	0	0	0	0	1	0	0.630685	0	0	0	0
A0A3B3IRI9;A0A3B3IRJ3;A0A3B3IRV1;A0A3B3IRZ0;A0A3B3IS37;A0A3B3IS68;A0A3B3ISJ4;A0A3B3IT04;A0A3B3IT30;A0A3B3ITZ3;A0A3B3IU52;A6NFW1;A6NGJ7;Q9BY41;Q9BY41-4
A0A3B3IRJ9;Q9Y2H2	0.436122	0	0.629992	0.353379	0.576524	1	0.33261	0.628376	0.548439	0.319484	0.307028	0	0	0.91225
A0A3B3IRK5;Q9H2D1	0	0	0	0	0	0	0	0	0	0	0.363096	1	0	0.304352
A0A3B3IRL2;O75629	0.0523381	0	0.117023	0.229501	0.16054	0.590943	1	0.631251	0.7567	0.608646	0.466386	0.52045	0.371102	0.531834
A0A3B3IRL5;C9J381;P20839;P20839-2;P20839-3;P20839-4;P20839-5;P20839-6;P20839-7	0	0	0	0	1	0.865346	0	0	0	0	0	0	0	0
A0A3B3IRM7
A0A3B3IRN8;A0A3B3ITX0;P24311	0.0326169	0	0	0.00978868	0.00828774	0.0254776	0.0904684	0.103124	0.123534	0.224426	0.438532	1	0.770694	0.525468
A0A3B3IRQ7	0	0	0	0	0	0	0	0	0	0	0	0.358354	1	0
A0A3B3IRQ9;P55265-2;P55265-3	0	0	0	0	0	0	0	0	0	0	0	0	0.119293	1
A0A3B3IRR1;A0A3F2YNY7;P08397;P08397-2	0.78878	1	0.47684	0.477689	0.197996	0.192991	0.142497	0.144483	0.0792968	0.0866119	0.0245537	0	0.0274102	0
A0A3B3IRS4;A0A3B3IRX3;A0A3B3IS46;H0YHC1;Q71F56	1	0	0	0	0	0	0	0	0	0	0	0	0	0
A0A3B3IRT8;C9IZQ1;C9J3L8;C9J5W0;E9PAL7;P43307	0.0311938	0	0.0023053	0.0129114	0.0237826	0.0657786	0.17209	0.237054	0.37105	0.327483	0.833668	1	0.930647	0.498738
A0A3B3IRU6;A0A3B3ISL2;Q9GZU2;Q9GZU2-2;Q9GZU2-4
A0A3B3IRY8	0	0	0	0	0	0	0	0	0	0	0	0	1	0
A0A3B3IRZ5;Q8IYE1	0.128128	0	0	0	0	0	0	0	0	0.108916	0	1	0.868719	0.447313
A0A3B3IS06;E7ETY2;Q13428-3;Q13428-7;Q13428-8	0.533168	0.513941	0.414807	0.264441	0.287629	0.21389	0.124583	0.119193	0	0.0598131	0.246922	0.372486	0.361913	1
A0A3B3IS13	0.730483	0	1	0	0	0.464986	0	0	0	0	0	0	0	0
A0A3B3IS24;C9JIR6;O75688;O75688-2;O75688-4	1	0.656845	0.442676	0.360362	0.531216	0.371071	0.288993	0.100909	0.10477	0.135692	0.0936449	0.0541216	0.040532	0
A0A3B3IS40;A0A3B3ISE6;A0A3B3IT25;A0A3B3ITA8;A0A3B3ITA9;A0A3B3ITE7;A0A3B3ITJ7;B3KV94;Q9UGL1;Q9UGL1-2	0	1	0.310263	0.319105	0.158117	0	0.20381	0	0	0.585622	0	0	0	0
A0A3B3IS62;A0A3B3ITD6;A0A3B3ITI5;Q9Y672;S4R350	0	0	0	0	0	0.108462	0.323588	0.36424	0.36666	0.442108	0.484084	1	0.704899	0.473467
A0A3B3IS71;P06400	0	0	0	0	0	0	0.0672731	0	0.107663	0.191523	0	0.0482094	0	1
A0A3B3IS75;K7EIP0;K7EJD9;K7ESF2;P13686	0	0	0	0	0.0662533	0.30333	0.292437	0.272039	0.431962	0.708999	0.580899	0.729426	0.696531	1
A0A3B3ISF0;Q659C4;Q659C4-2	0	0	0	0.340474	0.26169	0.613235	0.888329	0.590231	0.824399	1	0.997515	0.95969	0.88782	0
A0A3B3ISF6;Q96G42
A0A3B3ISF9;P42892;P42892-2;P42892-3;P42892-4	0	0.0204142	0.232956	0.52333	0.793783	0.941892	1	0.693885	0.686738	0.404706	0.561317	0.362723	0.33503	0.544313
A0A3B3ISG5;P14735	0.565495	1	0.6877	0.424045	0.357509	0.16003	0.191145	0.0425738	0	0.12043	0.0807226	0.195239	0.269317	0.0625542
A0A3B3ISG8	0.0351476	0	0.388946	0.00769892	0.0050576	0.0246158	0.138055	0.127102	0.195607	0.370477	0.691193	1	0.966462	0.567488
A0A3B3ISH6;Q86U38;Q86U38-2	0	0	0	0	0	0	0	0.0477364	0.0239568	0.392542	0	0.00162812	0.111876	1
A0A3B3ISJ2;Q96KQ4	0.393255	0	0.394443	0.342115	0.0522605	0.235288	0.179838	0.267262	0.457051	0.436001	0.670781	0.486054	0.646885	1
A0A3B3ISK7;Q6PI48	0.0161688	0.106893	0.103875	0.0126719	0.0200281	0.00257195	0	0.009344	0.0291556	0.0572138	0.248672	1	0.914982	0.506945
A0A3B3ISP1;A0A3B3ITU5;Q92625;Q92625-2	0	0	0	1	0	0	0	0	0	0	0	0	0	0
A0A3B3ISQ4;Q9H6S3	0.705333	1	0.632568	0.691878	0.624122	0.511524	0.369889	0.400199	0.36805	0.556786	0.177198	0.30314	0.0376607	0
A0A3B3ISR2;B4DPQ0;P00736	0.340948	0.224464	0.228143	0.0513592	0.412022	0.527038	0.87683	1	0.808243	0.588095	0.299341	0.197539	0.111259	0
A0A3B3ISR7;E9PIF2;Q13206	0	0	0	0	0	0	0	0	0	0	0.268796	0	0	1
A0A3B3ISS6	0	0	0	0	0	0	0	0.239984	0.441948	0.369944	1	0.301724	0.0307322	0.526337
A0A3B3IST1;B5MD23;O75954	0	0	0	0	0	0.101737	0.203256	0.415604	0.5857	0.622052	0.569114	0.588801	0.475758	1
A0A3B3ISU0;Q02487	0.543413	0	0	0	0.0334369	0.057417	0.240436	0.0914771	0.64161	0.645078	0.636615	0.41627	0.360644	1
A0A3B3ISV3;P02462	0.170807	0	0	0	0.0046669	0.0128807	0.0508327	0.0875409	0.347963	0.718812	0.698631	0.955179	0.514934	1
A0A3B3ISV4	0.308425	0	0	0	0.2129	0.364876	0.400774	1	0.63387	0.592503	0.351246	0.473197	0.490342	0.263426
A0A3B3ISV5;Q8N9N7	0.78103	0	0.497778	0.448055	0.561442	0.5093	0.357123	1	0.808431	0.685535	0.484307	0.49644	0.114272	0.246953
A0A3B3ISV8;A0A6Q8PF19;A0A6Q8PFS9;A0A6Q8PHH0;Q8IZF0	0	0	0	0	0	0	0.757249	0.817009	1	0.770743	0	0.721275	0.271959	0.324861
A0A3B3ISV9;O43414	0.762948	1	0.5908	0.356558	0.416447	0.319015	0.161517	0.321017	0.256032	0.205592	0.192045	0	0	0
A0A3B3IT21	0	0	0	0	0	0	0	0	0	0	0	0	0	1
A0A3B3IT28;A0A3B3ITE5;A0A3B3ITF7;A0A3B3ITW6;A0A3B3IU40;A0A3B3IUA1;A0A3F2YNW9;Q12756;Q12756-2;Q12756-3	1	0	0.526007	0	0.65479	0.121609	0	0	0	0.0751006	0	0	0	0
A0A3B3IT31;Q9NUN5;Q9NUN5-3	0.953336	0	0	0.8657	0.894722	1	0.865626	0.960341	0.99317	0.862831	0.221859	0	0	0.291851
A0A3B3IT82;H0YNU5;P54132	0	0	0	0	0	0	0	0	0	0	0	0.759341	1	0.216769
A0A3B3IT92;P33991	0.31549	1	0.866586	0.458846	0.511951	0.50081	0.245402	0	0.0935327	0.189098	0.191012	0.376693	0.380594	0.625554
A0A3B3ITH3;Q9P2X3	0.750021	1	0.572626	0.546634	0.424138	0.360955	0.150096	0.220284	0.12573	0.10154	0	0	0	0
A0A3B3ITJ4	0	0	0	0	0	0	0.123879	0.0906758	0.122533	0.0252939	0.131039	0	0.266685	1
A0A3B3ITK0;P35442	0.384005	1	0.480891	0.519807	0.392227	0.200739	0	0.0464426	0.0335134	0	0	0	0	0
A0A3B3ITN0;Q86TP1	0.956218	1	0.433622	0.409277	0.293362	0.167256	0.15819	0.104299	0.0693134	0.0736255	0	0	0	0
A0A3B3ITN6;D6RBB0;O60683;O60683-2	0	0	0	0	0	0	0.166445	0.0596923	0.238531	0.526663	0.601806	1	0.934641	0.43303
A0A3B3ITP4;Q495G5;Q8IVH4	0.0607613	0.0368536	0	0.0255171	0.0283807	0.0212454	0.0352617	0.0487055	0.09527	0.127632	0.451639	1	0.9977	0.933702
A0A3B3ITT1	0.971339	0.600965	0.157051	0.0678334	0.191	0.303815	0	0.286299	0.490883	0.484063	0.382984	1	0.127291	0.528676
A0A3B3ITT5;P47914	0	0	0.02617	0.0582566	0.0527435	0.100778	0.224252	0.17802	0.248406	0.451613	0.623184	1	0.73549	0.482489
A0A3B3ITU8;A0A3B3IU04;A0A3F2YNW8;Q14643;Q14643-2;Q14643-3;Q14643-4;Q14643-5;Q14643-6;Q14643-7;Q14643-8	0.267602	0	0.0464452	0.0706108	0.0686252	0.170113	0.569891	0.514994	0.620115	0.800995	0.70703	1	0.885518	0.699351
A0A3B3ITW1;P49841;P49841-2	0.706844	1	0.547792	0.326586	0.270494	0.0974812	0.174813	0.354686	0.249863	0.209323	0.0718005	0.0756213	0	0.0854232
A0A3B3ITZ6	0	0	0	0	1	0	0	0	0	0	0	0	0	0
A0A3B3IU24;Q92743	0	0	0	0	0	0	0	0	0	1	0	0	0	0
A0A3B3IU42;G5EA29;H0YDP6;H0YEL0;O14893;O14893-2;O14893-3	0	0	0	1	0.711226	0.857319	0	0.580421	0.60835	0.529496	0.512896	0	0	0
A0A3B3IU65;A9UHW6;A9UHW6-2;A9UHW6-3;J3KSU6;J3QLD1;J3QLJ5;J3QRZ6	0	0	1	0.840958	0.722634	0.497609	0.242699	0.244548	0	0	0	0	0	0.143034
A0A3B3IU69;F8W717;O00423;O00423-3	0.412134	0	0.304324	0.429019	0.425651	0.937183	0.781895	1	0.710966	0.836071	0	0	0	0
A0A3B3IUA2;B1AHD1;P55769	0.0210128	0.00677268	0	0.00572952	0.0110127	0.0114987	0.01682	0.00682359	0.0370858	0.0477836	0.102031	0.0988055	0.0862623	1
A0A3B3IUB1;Q13144	0.598118	0.710935	1	0.457177	0.398726	0.0606803	0.13349	0.206469	0.337671	0.253266	0.118493	0.0363227	0.118743	0
A0A3B3IUB5;Q8TCT9;Q8TCT9-5	0.068369	0	0.0359808	0.0600754	0.173014	0.32361	0.891852	1	0.824265	0.533042	0.474684	0.409926	0.388932	0.470867
A0A3B3IUC4;A0A6Q8PFA9;P06280	0	0	0.155431	0.0256303	0.153693	0.153632	0.153929	0.335159	0.49951	0.366223	0.517152	0.703219	0.644766	1
A0A3B3IUD2;Q9BUK6;Q9BUK6-2;Q9BUK6-3;Q9BUK6-7	0.0511763	1	0.681297	0.587205	0.469446	0.327431	0.252093	0.1608	0.108513	0.151637	0.0401688	0	0.0203037	0
A0A3B3IUD4;P21453	0	0	0	0	0	0	0	0	0.999934	0.614868	0.547703	0	0	1
A0A3B3IUD7;Q14690	0.232884	0.0894449	0	0	0	0	0.0211059	0.107824	0.110951	0.165566	0.153935	0.128486	0.133308	1
A0A3Q5ACI7	0	0	0	0	1	0	0	0	0	0	0	0	0	0
A0A494BXY3;E9PLD3;E9PRG8	0	0	0	0	0	0	0	0	0	0	0	0	0	1
A0A494BZU6;A0A494BZW7;A0A494C002;A0A494C0P9;A0A494C0Q2;A0A494C0Q6;A0A494C0W0;A0A494C156;A0A494C1K5;A0A494C1N1;O95453;O95453-2	0	0	0	0	0	0	0	0	0	0	0	0	0	1
A0A494BZV4;A0A494C069;Q08AG5	0	0	0	0	0	0	0	0	0	1	0	0.916199	0	0
A0A494BZZ6;P78549;P78549-2;P78549-3	0	0	0	0	0	0	0	0	0	0	0	0	0	1
A0A494C004;A0A494C0C5;A0A494C0D2;A0A494C0V5;A0A494C141;A0A494C1C6;A0A499FJ53;A6XNE1;F6Y2X3;Q16635;Q16635-2;Q16635-3;Q16635-4;Q16635-5;Q16635-6;Q16635-7;Q16635-8;Q16635-9	0	0	0	0	0	0	0	0	0	0	0	1	0	0
A0A494C028;H0Y993;P35659	0.0814471	0.071125	3.92511e-05	0.0182642	0.00701042	0	0.021098	0.0122283	0.0417224	0.0600385	0.176829	0.184255	0.214645	1
A0A494C039	0	0	0	0	0	0	0	1	0.859488	0	0	0	0	0
A0A494C066;B7Z4W5;Q16773	0.929272	1	0.855358	0.416308	0.417865	0.233618	0.0896972	0.0561702	0	0.0314795	0.0635058	0.0462512	0.0829615	0.000219776
A0A494C068;A0A494C1K7;E9PGP6;Q9UGJ0;Q9UGJ0-2;Q9UGJ0-3	1	0.869231	0.686923	0.790634	0.684755	0.312281	0.543513	0.668342	0.517511	0.340389	0	0	0	0
A0A494C0C1	0	0	0	0.982443	0	1	0	0	0	0	0	0	0	0
A0A494C0J7;Q08188	0	0	0	0	0	0	0	0	0	0	0	0.830115	1	0.455097
A0A494C0K7;A0A494C0P0;Q6P2C8;Q6P2C8-2	0	0	0	0	0	0	0	0	0	0	0.143501	0	0	1
A0A494C0M1;P52701	0.550625	0.511607	0.31603	0.175314	0.348751	0.351416	0.0793901	0.111876	0.0221642	0.0592716	0.0296535	0.133205	0	1
A0A494C0M2;O95925-3;Q9BQY6;Q9BQY6-2
A0A494C0N4;H9KV93;Q7Z4L5
A0A494C0P1;P04150;P04150-10;P04150-2;P04150-3;P04150-6;P04150-8;P04150-9	0.618411	1	0.905223	0.647748	0.9954	0.293585	0.180195	0.111045	0.0124569	0.104993	0.0582002	0	0.157063	0.160604
A0A494C0R8	0.0342575	0.10637	0.893965	1	0.766588	0.568305	0.53461	0.367502	0.32017	0.410285	0.14487	0.163018	0.131738	0
A0A494C0X7;D3DSM0;P05107	0	0	0	0.232179	0.286648	0.341261	0.409357	0.712737	1	0.609534	0.450583	0.29513	0.369247	0.415652
A0A494C0Z5;Q9H082	0.746928	0	0.185692	0.47779	0.34482	0.380354	0.384845	0.351895	0.451997	0.358524	0.331536	0.646781	1	0.523194
A0A494C100;Q9UJA2;Q9UJA2-2	0	0	0	0	0	0	0.185467	0.247419	0.420333	0.321989	0.531223	0.985447	1	0.191104
A0A494C105;Q9H3U5;Q9H3U5-3;Q9H3U5-5;Q9H3U5-6	0.32811	0	0.196083	0.183328	0.437946	0.651139	0.522181	1	0.641528	0.338819	0.174693	0	0	0.0532401
A0A494C108;Q8N9T8	0	0	0	0	0	0	0	0	0	0	0	0	0	1
A0A494C115;A0A494C1U4;K7N7A8;P29972;P29972-2;P29972-3;P29972-4	0.231653	0	0	0	0.107208	0.184689	0.359938	0.682437	0.876297	1	0.544764	0.324582	0	0.704379
A0A494C120;C9J8H5;Q9HA38;Q9HA38-2	0	0	0	0	0	0	0	0	1	0	0	0	0	0
A0A494C143;Q14689;Q14689-6	0.178476	1	0.461226	0	0.68213	0.250596	0.323778	0.222406	0.298179	0.259656	0.115693	0	0	0.202117
A0A494C146;P50336	0.158797	0	0.0274488	0	0.0478479	0.0216089	0.0653863	0.0794746	0.105532	0.141687	0.363425	0.99248	1	0.788004
A0A494C164;P52630;P52630-4	0.540453	1	0.702005	0.598063	0.581709	0.207314	0.326085	0.281905	0.126181	0.163322	0.023435	0	0.143331	0.051413
A0A494C165;K7ES25;P12955	0.848614	1	0.84339	0.630195	0.502649	0.459444	0.196094	0.159725	0.103893	0.117279	0.045991	0.0210697	0.0281482	0
A0A494C167;Q9UHD2	0.609693	1	0.625736	0.795295	0.553275	0.214866	0.422035	0.31204	0.143782	0.182546	0	0.00951442	0.113467	0.222945
A0A494C172
A0A494C193;Q08E93	0	0	0	0	0	0	0	0	0.129021	1	0	0	0	0.481622
A0A494C1F2;P35658;P35658-2;P35658-3;P35658-4;P35658-5	0.0500786	0	0.04981	0.209406	0.22461	0.323312	0.00332391	0.0216154	0.0712784	0.286167	0.0321865	0.497129	0.541155	1
A0A494C1J1;Q69YQ0;Q69YQ0-2	0.153989	0	0	0.0566488	0.0311977	0.090828	0.219207	0.145382	0.457439	0.507159	0.666261	0.710144	0.617739	1
A0A494C1J8	0	0	0	0	0	0	0	0	0	0	0	0.456043	1	0.180873
A0A494C1L5;P50851-2	0.562533	1	0.874492	0.679124	0.557855	0.378131	0.298834	0.19658	0.171713	0.165606	0.0379724	0.0624499	0	0.0281199
A0A494C1M4;Q3SY69	0.278166	0.840435	1	0.517266	0.692234	0.426126	0.275775	0.25867	0.105548	0	0	0	0	0
A0A494C1N0;P26885	0.0785694	0.0152361	0	0.0464402	0.0718946	0.527665	0.839793	0.780254	0.713015	1	0.847542	0.970897	0.912511	0.485324
A0A494C1S7;Q9Y5Q9	0.0741824	0.188049	0.447199	0.0574997	0.0202753	0.0741739	0.0134278	0.00330334	0	0.141083	0.0713816	0.115645	0.103952	1
A0A494C1T9;Q6ZRV2	0.235252	0.126092	0.116549	0.233256	0	0.060359	0.127638	0.0078962	0.41375	0.619818	0.628362	0.617631	0.671697	1
A0A494C1V1;Q6ZNJ1;Q6ZNJ1-2;Q6ZNJ1-3	0	0	0.320307	0.316662	1	0.615191	0.711131	0.57353	0.562047	0.503441	0.248497	0	0	0
A0A499FI31;Q15020;Q15020-4	0.173471	0.646827	1	0.74283	0.437613	0.268131	0.225008	0.186956	0.181454	0	0.21566	0.213067	0.270316	0.430453
A0A499FI48;P13667	0.0599946	0.0100634	0	0.0165895	0.0704621	0.26371	0.754548	0.973546	1	0.680922	0.718251	0.644782	0.788315	0.421339
A0A499FIS5;A0A499FJN1;A0A499FJS1;Q9BUB5;Q9BUB5-2;Q9BUB5-3	1	0	0.769353	0.764729	0.230528	0	0	0	0	0	0	0	0	0
A0A499FIX8;A0FGR8-2;H7BXI1	0.253453	0	0.0920968	0.133211	0.213893	0.431684	0.847538	1	0.983353	0.784018	0.693682	0.723543	0.76494	0.721901
A0A499FIY8;C9JC07;C9JZL8;Q96S97	0	0	0	0	0	0	0	0	0.850266	0.904217	1	0	0	0.847765
A0A499FIZ0	0.410232	0.783968	1	0.847546	0.401762	0.0882368	0.195005	0.276845	0.205778	0.258977	0.047025	0.217444	0	0.0581988
A0A499FJ41;K7ES72;Q13938;Q13938-3;Q13938-4	0	1	0	0	0.176918	0	0	0	0	0	0	0	0	0
A0A499FJI4;O75592;O75592-2	0	0	0	0.987904	0.445943	0.342604	0.486908	0.5945	1	0.818306	0.429749	0	0	0.73411
A0A499FJM4;P08684	0.104941	0	0.0600324	0.0896928	0.182752	0.460499	1	0.975171	0.691657	0.561461	0.41432	0.328397	0.343846	0.299088
A0A4V7I447;Q0VD83;Q0VD83-2
A0A539;A0A589
A0A590PXD8;Q53SF7-3	0.213231	1	0.834882	0.72197	0.479567	0.324994	0.27651	0.268758	0.556571	0.41897	0.270488	0.0329401	0.105916	0
A0A590UIU4;A0A590UJ09;A0A590UJ61;A0A590UJC8;A0A590UJF4;A0A590UJG1;A0A590UJH1;A0A590UJS0;A0A590UJT1;A0A590UK11;A0A590UK42;A0A590UK98;Q5VZ66	1	0	0	0	0	0	0.0657598	0	0.21515	0.432491	0.911059	0.84583	0	0
A0A590UJ36;A6NDB9	0.803599	0.46186	0.253248	0.0828995	0.26081	0.0930589	0	0.394518	1	0.525384	0.547005	0.283306	0.279066	0.578228
A0A590UJ43;P48729;P48729-3;U3KPX3	0.249609	0.422996	0.448438	0.181853	0.0927652	0	0.139122	0.297826	0.349995	0.363393	0.327458	0.242102	0.280913	1
A0A590UJ46	0	0	0	0.979032	0.615504	0.563899	0.735031	0.538628	0.585836	1	0.541631	0.578826	0.377563	0.443476
A0A590UJ50;A0A590UJR3;Q13616	0.542896	0.936718	1	0.640099	0.523993	0.295061	0.212083	0.216381	0.124425	0.164754	0.0222437	0.0761923	0	0.184688
A0A590UJ62;E7ETH1;Q14003	0	0	1	0.554909	0	0	0	0	0	0	0	0	0	0
A0A590UJ68;A0A590UJR5;A0A590UJS9;A0A590UKA8;Q12959;Q12959-3;Q12959-5;Q12959-6;Q12959-7	0.246261	0.0284422	0	0.059077	0.051432	0.063037	0.239805	0.277896	0.671583	0.799973	1	0.700102	0.745567	0.882514
A0A590UJ73;A0A590UJW4;E7EQB3;Q9BSV6	0	1	0.69385	0.68337	0	0.603966	0.417952	0	0	0	0	0	0	0
A0A590UJA9;C9JCW7;C9JE12;Q9BVT8	0.126361	0	0	0.0427711	0.143865	0.326347	0.685281	1	0.69348	0.565717	0.429758	0.479344	0.424117	0.51802
A0A590UJB6	0	0	0	0	0	0	0	0	0	0	1	0	0	0
A0A590UJC7;A0A590UK51;O60733;O60733-2	0.523134	1	0.562874	0.453036	0.584929	0.226157	0.285267	0.232932	0.00849258	0.109479	0	0.351129	0.018271	0.139307
A0A590UJF0;P63092-3	0.645983	0	0.125285	0.037064	0.148667	0.344724	0.408617	0.754357	0.988803	0.91657	0.930849	0.688181	0.591779	1
A0A590UJG2;Q9UPN3-2;Q9UPN3-3	0.751281	1	0.668147	0.540169	0.624848	0.552937	0.703724	0.474045	0.536581	0.364176	0.311009	0.00614318	0	0.0505631
A0A590UJK3;Q14BN4;Q14BN4-2;Q14BN4-3	0	0	0	0	0.698101	0.374199	0.752127	0.658404	0.90653	0.7414	0.847306	1	0.812684	0.92007
A0A590UJK4;A0A590UJP7;A0A590UK01;A0A590UK80;Q13247;Q13247-3	0.00126684	0	0.0578525	0.163319	0.0788786	0.249703	0.246938	0.247518	0.241879	0.442111	0.389011	0.703715	0.837868	1
A0A590UJL0;P08842	0.0451846	1	0.163431	0.0772093	0	0.0488277	0.0254221	0.0792972	0.0129378	0.0284057	0.0361633	0.0126298	0.00803621	0.00415333
A0A590UJN0;E7ETK1;E9PBA8;Q52LR7;Q9H2F5;Q9H2F5-2	0	0	0	0	0	0	0	0	0	0	0	0	0	1
A0A590UJS8;A0A5F9ZA98;B4DGL8;O75027;O75027-2	0.0276971	0	0	0	0.0196672	0.0289281	0.0992181	0.108398	0.152834	0.337987	0.537013	1	0.728514	0.497662
A0A590UJW0;A0A590UKC9;P20585	0.522205	0.498626	0.121979	0.444872	0.278686	0.0887908	0.398682	0.448013	0.452248	0.440024	0.869035	0	0.393857	1
A0A590UJW8;Q96J02;Q96J02-2	0.201451	0	0.102534	0.165731	0.161407	0.105518	0.414284	0.365326	0.529834	0.792048	0.456894	0.512588	0.161087	1
A0A590UJY5	0.554815	1	0	0.56799	0	0	0.130043	0	0	0	0	0	0	0
A0A590UK09;A0A590UK73;B1AKN5;B1AKN7;B1AKN8;Q12857;Q12857-2;Q12857-4	0.0272779	0.0364582	0.0156004	0.0695662	0	0.0701126	0.0124644	0.0702009	0.148934	0.0843063	0.041666	0.0805109	0.105122	1
A0A590UK87	1	0	0.14394	0	0.191876	0	0	0	0	0	0	0	0	0
A0A590UKC3;Q9UF12	0.0886638	0.0258359	0.0184781	0	0.0141353	0.0545347	0.0819129	0.11743	0.214708	0.292084	0.322796	0.947948	1	0.431494
A0A5E8;Q99501;Q99501-2;Q99501-3;Q99501-4	1	0	0	0.27098	0.181426	0.220383	0.512705	0.378953	0.608685	0.5477	0.35007	0.340778	0.71475	0.890746
A0A5F9UK94;H0Y360;Q01433;Q01433-2	0.583512	1	0.91728	0.594487	0.444548	0.338053	0.24266	0.171264	0.112778	0.12104	0.0240131	0.0427594	0.0309518	0
A0A5F9UP49;Q9BRK5	0.0492377	0	0.0423994	0.307293	0.702718	1	0.677885	0.373426	0.1496	0.163204	0.214494	0.141307	0.0955259	0.16064
A0A5F9UY30;A0A5H1ZRP2;O43493;O43493-3;O43493-5;O43493-7	0.254705	0	0.154253	0.407908	0.678556	1	0.558635	0.680111	0.347948	0.209144	0.140841	0.0196417	0.0377472	0.0824617
A0A5F9YFS9;C9JBL1;Q9Y6A9	0	0	0	0	0.0922657	0.304884	0.793186	1	0.495023	0.523326	0.748332	0.796972	0.673811	0.627095
A0A5F9YLF9
A0A5F9ZGN6
A0A5F9ZGW5;C9J8U3;Q7Z2E3-13;Q7Z2E3-5;Q7Z2E3-7;Q7Z2E3-9	0.054595	0.128536	0	0.233905	0.181376	0.197732	0.447707	0.372455	0.252877	0.543448	0.433621	0.809307	0.706485	1
A0A5F9ZGX0	0	0	0	0	0	1	0.356445	0	0.808743	0	0	0	0	0
A0A5F9ZGX3;A0A5F9ZGY3;A0A5F9ZGY4;A0A5F9ZGZ5;A0A5F9ZH19;A0A5F9ZH30;A0A5F9ZHD2;A0A5F9ZHE4;A0A5F9ZHN5;A0A5F9ZHR8;A0A5F9ZHS1;A0A5F9ZI30;A0A5F9ZI40;A0A5F9ZI65;D6RHE1;I6L894;Q01484	0.036646	0	0.10406	0.155468	0.0479993	0.0593021	0.10825	0.148811	0.165003	0.18095	0.520096	0.811331	1	0.337121
A0A5F9ZGY7	0.901491	1	0.737512	0.407489	0.468058	0.40614	0.327796	0.135978	0.103548	0	0	0	0	0
A0A5F9ZH13;E9PR06;Q9NQC8;Q9NQC8-2	0	0	0.0832873	0	0	0	1	0	0	0	0	0	0	0
A0A5F9ZH20;A0A5F9ZH60;A0A5F9ZH84;Q5TF39
A0A5F9ZH93;A0A5F9ZHX9;Q9UHN1	0	0	0	0	0.0780929	0	0	0	0.164781	0.225394	0.613069	1	0.831867	0.91356
A0A5F9ZHE0;C9JQD1;P35557	0.980263	1	0.645377	0.461549	0.565166	0.365391	0.199283	0.157614	0.129817	0.160098	0.0929004	0	0	0
A0A5F9ZHH6;P19793;P19793-2	0.135835	0	0	0.11329	0.196348	0.227138	0.238801	0.306025	0.199475	0.257646	0.283093	0.331279	0.481923	1
A0A5F9ZHJ0	0.0266759	0.103477	0.0571262	0.0190803	0.0456195	0.00623356	0	0.0698385	0.107492	0.124454	0.377437	0.939758	1	0.746161
A0A5F9ZHM4;P07195	0.530102	1	0.663053	0.478893	0.432319	0.253305	0.175502	0.14915	0.087535	0.0776114	0.0344331	0.0095781	0.0132856	0
A0A5F9ZHN2;E7EWD6;Q76L83;Q76L83-2	0	0	0	0	0	0	0	0	0	0	0	0	0	1
A0A5F9ZHN7;Q9NTJ5	0.155137	0	0.0536047	0.0929876	0.156898	0.425056	1	0.946822	0.748115	0.690029	0.502142	0.641968	0.514973	0.405273
A0A5F9ZHN9;P51648;P51648-2	0.14089	0	0.0428372	0.0856569	0.149284	0.364667	0.888165	1	0.920901	0.742059	0.619195	0.652266	0.644438	0.491042
A0A5F9ZHP1;Q8N9N2-2	0.193432	0	0.147704	0.264414	0.247855	0.174505	0.504203	0.430102	0.621269	1	0.588319	0.855802	0.53711	0.794967
A0A5F9ZHX8;A0A5F9ZHZ5;F5GYY5;F5H324;P51690	0.0668712	0	0.0290331	0.0766312	0.164587	0.337924	0.592457	1	0.807427	0.602213	0.402658	0.512533	0.378397	0.396943
A0A5F9ZI21;Q92974;Q92974-2;Q92974-3;V9GYF0;V9GYM8	0	0	0	0	1	0.54273	0	0	0.29646	0	0.144867	0	0	0
A0A5F9ZI33	0	0	0	0	0	0.281859	0.681015	1	0.78817	0.616902	0.44482	0.510956	0.70021	0.236333
A0A5F9ZI63;O75530;O75530-2;O75530-3	0	0	0	0	0	0.328588	0	0.403742	0	0.120311	0.22826	0	0	1
A0A5F9ZI76;Q32ZL2;Q32ZL2-2	0	0	0	0	0	0	0	0	0	0	1	0	0	0
A0A5H1ZRP4;Q8WX92;Q8WX92-2	0.486265	1	0.473834	0.513139	0.473206	0	0.307832	0.329279	0.133659	0.546685	0.435379	0.504641	0.880048	0.670202
A0A5H1ZRR2;G9CGD6;G9CGD6-2;G9CGD6-3;Q6P9H4	0	0	0	0.259872	0.246323	0.372172	0.51459	0.740284	0.851676	0.612717	1	0.663851	0.981497	0.791925
A0A5H1ZRS1	0.466304	0	1	0.29964	0.416386	0.293933	0.537349	0.467506	0.704632	0.697659	0.649016	0.813885	0.759883	0.788562
A0A5K1VW60;Q99766	0.171923	0.0303559	0.123968	0.128269	0	0	0.0739788	0.0845188	0.116088	0.127847	0.502033	1	0.895063	0.716822
A0A5K1VW61;A0A5K1VW71;A0A5K1VW79;A0A5K1VW93;H0Y9D9;Q7Z5Q1;Q7Z5Q1-3;Q7Z5Q1-4;Q7Z5Q1-5;Q7Z5Q1-6;Q7Z5Q1-7;Q7Z5Q1-8;Q7Z5Q1-9;Q8NE35;Q8NE35-2	0	0	0	0	0	0.605228	0.451388	0	1	0	0	0	0	0
A0A5K1VW66;P35240;P35240-2;P35240-3;P35240-4;P35240-5;P35240-6;P35240-8	0	0	0	0	0	0	0.568395	0.37828	0.720919	1	0.46854	0.80636	0.380769	0.832147
A0A5K1VW95;P40925;P40925-3	0.625528	1	0.704887	0.471991	0.379851	0.292081	0.180883	0.132584	0.0907926	0.106248	0.0358479	0.0220449	0.0241932	0
A0A669KA36;A0A669KB88;B7ZLR4;E7ET55;F5H748;P35670;P35670-2;P35670-4	0.171441	0	0	0.124111	0.27666	0.573738	1	0.753441	0.820315	0.845418	0.550505	0.710401	0.36013	0.463283
A0A669KAV7;A0A669KBH9;M0QXA7;O95785-3	0	0	0	0	0	0	0	0	0	0	0	0.116503	0	1
A0A669KAW1;G3XAD2;Q9BYC5;Q9BYC5-2;Q9BYC5-3	0	0	0	0	0	0	1	0	0	0	0	0	0	0
A0A669KAX3;O76024	0.122102	0.48889	0	0.167109	0.104454	0.19299	0.284822	1	0.533709	0.187445	0.211395	0.0913138	0.165618	0.121603
A0A669KAX4;K4DI93;Q13620;Q13620-1;Q13620-3	0.618943	1	0.845765	0.410365	0.392267	0.352992	0.280889	0.136986	0.0565227	0.116692	0.12462	0	0.0144476	0.153064
A0A669KAX9;Q5T653	0	0	0	0.0511202	0	0.0894204	0.0586255	0.163407	0.25965	0.261044	0.555345	1	0.97188	0.604708
A0A669KAY5;A0A669KB27;A0A669KBH7;C9JTE9;Q9UHQ4;Q9UHQ4-2	0	0	0.113894	0.0764454	0.194438	0.335656	1	0.768344	0.662834	0.48773	0.257467	0.357125	0.249583	0.194936
A0A669KB10;A0A669KBG8;Q92538;Q92538-2;Q92538-3	0.28269	0.150652	0.0946903	0.352095	0.442383	1	0.89832	0.472791	0.128316	0.33848	0.00749562	0.0252294	0	0.0528852
A0A669KB12;Q09472	0	0	0	0.223807	0.164716	0.0213022	0.118698	0	0.03191	0.303798	0.264659	0.0267503	0.263826	1
A0A669KB29;K7EQ21;K7EQZ1;Q9P0U4;Q9P0U4-2
A0A669KB41;A0A669KBH5;D6RA31;E7EPV7;P37840;P37840-2;Q16143	0.370919	1	0	0	0	0	0	0	0	0	0	0	0	0
A0A669KB53;A0A669KB56;A0A669KB68;A0A669KBA4;A0A669KBI6;J3KPM9;P42224;P42224-2	0.644192	1	0.76709	0.504091	0.417972	0.231958	0.156172	0.135198	0.0646377	0.0602579	0.0408835	0.0435049	0.0347228	0
A0A669KB69;Q6Q788	0.645047	0	0	0.420141	0.504234	1	0.761258	0.48631	0.443066	0.44451	0.27422	0.335478	0.315329	0.311572
A0A669KB71;O94842;O94842-2;O94842-3	0	0	0	0.0713375	0	0.0509442	0	0.0669129	0.116057	0	0	0.193653	0.528298	1
A0A669KB81	0	0	0	0	0	0	0	1	0	0	0	0	0	0
A0A669KBE6;A0A669KBF5;Q9NV96;Q9NV96-2;Q9NV96-3	0.294184	0	0	0.205838	0.351103	0.334919	0.470568	0.420778	0.645163	0.635576	0.71537	1	0.403551	0.833596
A0A669KBF4;O00327;O00327-1;O00327-6;O00327-7;O00327-8;O00327-9	0	0	0	0	0	0	0	0	0	0	0	0	0	1
A0A669KBG1	1	0	0	0	0	0.795512	0	0	0	0	0	0	0	0
A0A669KBH1	0	0	0	0.295472	0	0.160521	0	0.389735	0.302313	0	0.285734	0	1	0
A0A669KBH4;Q14999;Q14999-2	0.318134	0.197339	1	0.651895	0.383186	0.33471	0.364515	0.330797	0.308669	0.343774	0.246125	0	0	0
A0A669KBJ1;Q9P202;Q9P202-3;Q9P202-4	0	0	0	0	0	0	0.566111	1	0	0	0	0	0	0
A0A669KBJ4;E7ERL6;Q6P0Q8;Q6P0Q8-2	0	0	0	0	0	0	0	0	0	0	0	0	1	0
A0A669KBJ7;Q9H2P0	0.131457	0	0.138826	0.0561906	0.199732	0.138014	0.128785	0.0806186	0.0683144	0.123262	0.278216	0.362368	0.432533	1
A0A669KBL1;Q93009;Q93009-3	0.640162	1	0.844725	0.614924	0.374111	0	0.270566	0.232047	0.358781	0.397299	0.269134	0.308738	0.234289	0.372838
A0A6E1WB48;Q14541;Q14541-2	0	0	0	0	0	0	0	0	0	0	1	0	0.770361	0
A0A6I8PIT3;A0A6I8PIV1;Q9P2J5	0.210826	0.340407	1	0.649466	0.494192	0.355889	0.237552	0.16422	0.0733814	0.11027	0.0379246	0	0.015045	0.00408432
A0A6I8PRM6;B1ALU3;O95490-2;O95490-5	0.44992	0	0	0	0	0	0.338274	0.56562	1	0.760714	0.788056	0.553275	0.581862	0.781116
A0A6I8PS32;Q99615	0.437388	1	0.739416	0.443499	0.48732	0.290695	0.149505	0.192421	0.0860521	0.075929	0.00305532	0	0.111978	0.00294497
A0A6I8PTZ8;Q9UL18	0.0361018	0	0.0582002	0.0884251	0.0718491	0.153944	0.379485	0.405806	0.570791	0.769236	0.625163	1	0.923327	0.502727
A0A6I8PU65;Q9NUD9	0	0	0	0	0	0	0	1	0.57404	0.850761	0	0	0	0
A0A6Q8JGF9;I3L1H5;I3L3X9;Q9BZG8;Q9BZG8-2;Q9BZG8-3	0.596551	1	0.56911	0.612238	0.454421	0.452876	0.35344	0.334371	0.19286	0.243156	0	0.335716	0	0.131369
A0A6Q8JH89;A0A6Q8LYX2;Q86WD7;Q86WD7-2;Q86WD7-4;Q86WD7-5;Q86WD7-6;Q86WD7-7
A0A6Q8JR05;Q6V0I7;Q6V0I7-3	1	0	0	0	0	0.716547	0	0	0	0	0	0	0	0
A0A6Q8KRG2;Q08379	0.188185	0	0.196796	0.376985	0.725508	1	0.504553	0.257976	0.174172	0.103869	0.114753	0.0980816	0.185548	0.134788
A0A6Q8PEX6;A0A6Q8PFB7;A0A6Q8PG86;A0A6Q8PHF4;O95163	0.487276	0.746263	1	0.64263	0.560194	0.297644	0.244796	0.189228	0.140464	0.148029	0.0130843	0.0508443	0.0289375	0
A0A6Q8PEY3;A0A6Q8PGV6;I3L3G9;I3L522;Q9NXR1;Q9NXR1-1	0	0	0	0.685142	0	1	0	0	0	0	0	0	0	0
A0A6Q8PEZ4;A0A6Q8PFG4;A0A6Q8PGL3;A0A6Q8PGS2;A0A6Q8PGU0;A0A6Q8PH79;B4DIH2;Q8TB36;Q8TB36-2	0	0	0	0	0	0	0	0	0	0.850322	0.340735	1	0.475257	0.671791
A0A6Q8PEZ7;A0A6Q8PG30;A0A6Q8PHQ1;Q96S66	0.0844577	0	0	0.0679098	0.114602	0.252832	1	0.889015	0.719716	0.683175	0.531772	0.686145	0.49446	0.374758
A0A6Q8PF03	0	0	1	0.74249	0.582634	0	0	0	0	0	0	0	0	0
A0A6Q8PF05;B4DHE8;J3KTC1;Q96DH6;Q96DH6-2	0.108949	0	0.238847	0.250634	0.348291	0.585957	0.47342	0.431726	0.806467	0.750668	0.865503	0.899921	0.964033	1
A0A6Q8PF10;A0A6Q8PF85;A0A6Q8PFT0;A0A6Q8PFW0;A0A6Q8PFY8;A0A6Q8PG57;A0A6Q8PHF1;B0QYZ8;B0QYZ9;O95461;O95461-2;V9GY39;V9GY56;V9GYK8;X5DRG1
A0A6Q8PF14	0	0	0	0	0	0	0	0	0	0	0	0	1	0
A0A6Q8PF33;A0A6Q8PGE8;A0A6Q8PGN5;H3BPK7;P49588	0.515332	1	0.705081	0.444667	0.38523	0.20944	0.140037	0.113759	0.0846872	0.055973	0.030736	0.0193477	0.0199868	0
A0A6Q8PF40;A0A6Q8PFC4;A0A6Q8PFY7;A0A6Q8PG00;A0A6Q8PG04;A0A6Q8PGS4;A0A6Q8PH27;A0A6Q8PH89;Q92734;Q92734-2;Q92734-3;Q92734-4	0.605048	1	0.761861	0.598925	0.617673	0.299958	0.135354	0.143775	0.116433	0.0585407	0.0680304	0.011516	0.0328538	0
A0A6Q8PF44;A0A6Q8PH71;A0A6Q8PHA2;A0A6Q8PHG2;Q27J81;Q27J81-2	0.618696	0.896224	0.7471	0.564591	0.685459	0.628136	0.835324	1	0.376584	0.552729	0.105238	0.180178	0.29588	0
A0A6Q8PF62;A0A6Q8PF70;A0A6Q8PF86;A0A6Q8PFJ3;A0A6Q8PG59;A0A6Q8PGB4;A0A6Q8PGP4;A0A6Q8PGY4;A0A6Q8PGY7;A0A6Q8PHA1;A0A6Q8PHC7;A0A6Q8PHH5;A0A6Q8PHK3;A0A6Q8PHP5;Q92562	0	0.235847	0.571895	1	0.714427	0.783162	0.741154	0.734757	0.575076	0.974945	0.380977	0.530163	0.465975	0.492984
A0A6Q8PF83;A0A6Q8PGD1;A0A6Q8PH95;D6REX9;Q8N960;Q8N960-2	0	0	0	0	0	0	0	0	0	0	0	0	0	1
A0A6Q8PF94;O15344	0	0	0.0405123	0.307439	0.405884	0.131624	0.640274	0.555743	0.536905	0.658359	0.762017	0.767205	0.61505	1
A0A6Q8PFA4;A0A6Q8PFD4;A0A6Q8PFI6;A0A6Q8PFL5;A0A6Q8PFT9;A0A6Q8PFW1;A0A6Q8PG02;A0A6Q8PG22;A0A6Q8PGB2;A0A6Q8PGF7;A0A6Q8PGH6;A0A6Q8PGT8;A0A6Q8PGW1;A0A6Q8PGY0;A0A6Q8PH15;A0A6Q8PH70;A0A6Q8PH85;Q6UWE0;Q6UWE0-2	0.59735	1	0.684225	0.608149	0.384364	0.355626	0.17822	0.193215	0.157861	0.1412	0.0821418	0	0.0184583	0
A0A6Q8PFA6;A0A6Q8PG37;A0A6Q8PGH7;A0A6Q8PH57;O00139;O00139-1;O00139-2;O00139-4;O00139-5	0	0.0796374	0.0651285	0.0199764	0.0841773	0.223048	0.236221	0.297289	0.447649	0.433662	0.334681	0.309745	0.302364	1
A0A6Q8PFE6;Q9UKA9;Q9UKA9-2;Q9UKA9-3;Q9UKA9-4	0	0	0	0.0823824	0	0.111821	0.0824322	0.122593	0.21801	0.340097	0.391817	0.531272	0.409938	1
A0A6Q8PFG0;A0A6Q8PGT4;A0A6Q8PH04;A0A6Q8PHN3;A0A6Q8PHP9;Q9P212;Q9P212-2	0	0	0	1	0	0	0	0.362984	0	0	0	0	0	0
A0A6Q8PFI8;P11166	0.367585	0	0	0.313235	0.740371	0.941122	0.851204	1	0.800041	0.618593	0.606229	0	0	0.806007
A0A6Q8PFJ0;P02545	0.0497303	0	0.00169835	0.0032526	0.00646828	0.0162649	0.0217426	0.0210917	0.0440746	0.0555564	0.140954	0.147348	0.135683	1
A0A6Q8PFJ4;A0A6Q8PGV8;O95140	0	0	0	0.0645264	0.0774891	0.0854714	0.24857	0.165124	0.252475	0.352678	0.544574	1	0.684241	0.464735
A0A6Q8PFK4;P50747	0.632987	1	0.548094	0.468901	0.306334	0.144485	0.113561	0.164691	0.247501	0.175033	0.155648	0.698413	0.260917	0
A0A6Q8PFM5;O95831;O95831-3	0.0700644	0.018704	0.00708499	0	0.0050481	0.022231	0.0787544	0.137149	0.229096	0.296821	0.467149	1	0.871109	0.631263
A0A6Q8PFU3;P43034	0.607323	1	0.872783	0.74261	0.58783	0.448202	0.3046	0.172408	0.115447	0.219694	0.0873126	0.133644	0.165054	0
A0A6Q8PFY3;Q9BXW9;Q9BXW9-1;Q9BXW9-3	0	0	0	0	0	1	0	0	0	0	0	0	0	0
A0A6Q8PG17
A0A6Q8PG52;A0A6Q8PH84;P51149	0.918785	0.140467	0.020694	0	0.164473	0.517144	0.50496	1	0.803931	0.371048	0.23009	0.146178	0.180419	0.312636
A0A6Q8PG54;G3XAG5;P51793;P51793-2	0	0	0	0	0	0.532469	1	0.791606	0.719593	0.630663	0	0	0	0.436098
A0A6Q8PG85;Q9HD42	1	0.748794	0.546508	0.424266	0.344175	0.4008	0.199999	0.265986	0.259342	0.0115679	0.201701	0	0.0205189	0.178766
A0A6Q8PGA8;A0A6Q8PGI6;A0A6Q8PGZ8;A0A6Q8PHH9;P41250	0.538908	1	0.813875	0.401797	0.366905	0.150863	0.0828472	0.0541099	0.0252238	0	0.0122347	0.137425	0.0848335	0.00274595
A0A6Q8PGB0;P24928	0	0.147985	0.181034	0.104742	0.106319	0.0668387	0.0809231	0.0790261	0.0719991	0.143095	0.103816	0.223784	0.103649	1
A0A6Q8PGM6;Q9UJY1	0.110567	0.307496	0.20881	0.231664	0.219049	0.193392	0.160873	0	0.164335	0.1567	0.252704	0.304518	0.142078	1
A0A6Q8PGS5;A0A6Q8PHS7;C9JEX3;Q13614;Q13614-2	0.450684	0.438211	0.205191	0.3609	0.311526	0.13157	0.627506	0.67716	0.53089	1	0.432536	0.489498	0	0.511143
A0A6Q8PGU6;Q8NB90	0	0.242714	0.425517	0.392069	0.314947	0.164001	0.185264	0.178439	0.200485	0.193913	0.088843	0.152351	0.00130974	1
A0A6Q8PH13;A0A6Q8PH87;Q86WG5;Q86WG5-3	0.990006	0	0	0	0	0	0	0.708559	0.560519	1	0	0	0	0
A0A6Q8PH21;Q9UHW9;Q9UHW9-2;Q9UHW9-3;Q9UHW9-4;Q9UHW9-5;Q9UHW9-6	0	0	0	0	0	0.510356	1	0.591596	0.51319	0.809939	0	0	0	0
A0A6Q8PH82
A0A6Q8PHA5;E7ETE2;P12081;P12081-4	0.650199	1	0.698845	0.409751	0.384955	0.229267	0.215837	0.158168	0.116648	0.117508	0.0317496	0.055845	0.032304	0
A0A6Q8PHC6;P50440	0.0399217	0.0644516	0.069674	0.0459536	0.00619576	0	0.041816	0.0292285	0.0425068	0.10465	0.325373	0.930376	1	0.598186
A0A6Q8PHH2;O95251;O95251-2;O95251-4	0	0	0	0	0	0	0	0	0	0	0	0	0	1
A0A6Q8PHK0;Q14669-2	0.0913066	0.477195	0	0.091955	0.0519357	0.110941	0.111448	0.0839697	0.0768552	0.282806	0.15076	0.238387	0.166452	1
A0A6Q8PHP0;P49902;P49902-2	0.597351	0.939467	1	0.659207	0.617121	0.377675	0.324802	0.408572	0.23784	0.188913	0.155675	0.0105487	0.196894	0
A0AV96-2	0	0.0385219	0.0611289	0.111924	0.134254	0.0449965	0.33169	0.367303	0.528929	0.706582	0.696384	1	0.859569	0.415983
A0AVL1;F8WC54;Q13443;Q13443-2	0	0	1	0	0	0	0.704363	0	0.179567	0.265239	0.260301	0	0	0
A0AVT1	0.607721	1	0.612824	0.439148	0.363177	0.272382	0.176516	0.143241	0.0673064	0.0634748	0.0179789	0.0243042	0.0191609	0
A0JLT2;A0JLT2-2;J3KR33	0	0	0	0	0	0	0	0	0	0	0	0	0	1
A0MZ66	0.544284	1	0.630281	0.60717	0.400924	0.283867	0.1679	0.140264	0.0779972	0.0545052	0.0275361	0.00945296	0.0314664	0
A0PJW6	0	0	0	0	0	0	0	0.172317	0	0.418975	0.472376	1	0.995186	0.844593
A0PJX8	0.300927	0	0	0.122355	0.100926	0.26056	1	0.631029	0.552616	0.493691	0.246673	0.318716	0.149146	0.189072
A0PJZ3;C9JND4	0	0	0	0	0	0	0	1	0.858699	0	0	0	0	0
A0RZB6	1	0	0.254925	0.314002	0.91325	0	0.204986	0.327123	0.231285	0	0	0	0	0
A1A4S6;H0Y8W5
A1A519;A1A519-2;A1A519-3;D6RIE9	0	0	0	0	0	0	0	1	0	0	0	0	0	0
A1A5C7;A1A5C7-2;A1A5C7-3;C9J4Z0
A1IGU5	0.466291	0.402676	0	0.193198	0.237136	0.237586	0.517877	0.292441	0.413685	0.726006	0.573077	1	0.540501	0.732703
A1L0T0	0.040653	0	0.0262348	0.0712255	0.177489	0.339102	1	0.933748	0.808543	0.677117	0.371364	0.497791	0.415095	0.20229
A1L188	0	0	0	0	0	0	0	0	0	0	0.510476	0.741533	1	0
A1L390;A1L390-3	0.345541	1	0.682001	0.464896	0.42329	0.243842	0.155573	0.0172764	0	0.152542	0.346514	0.0738793	0.142546	0.527774
A1X283	1	0.904352	0.609986	0.509494	0.521668	0.156098	0.152815	0.0926639	0.10681	0.131145	0.023318	0.0629824	0.0807481	0
A2A274;Q99798	0.0740714	0.0904375	0.038646	0.0209859	0.0180994	0.00463465	0.00174638	0	0.0483153	0.132594	0.488764	0.885971	1	0.519325
A2A2L4;Q5JX74;Q9NUS5	0	0	0	0	0	0	0	0	1	0	0	0	0	0
A2A2N0;O60676	0	0	0	0	0	0	0	0	0	0	0	0	0	1
A2A2Q9;Q9Y312	0.736251	1	0.770191	0.507323	0.409483	0.335122	0.202024	0.248446	0.141787	0.203114	0.0605922	0	0.0574759	0.125326
A2A2V1;P04156
A2A2V2;P42696;P42696-2;Q5TCT4	0	0	0	0	0	0	0	0	0	0	0	0	0	1
A2A369;Q8NF50;Q8NF50-2;Q8NF50-3;Q8NF50-4	0	0	0	0.0880951	0.143624	0.320811	0.452448	0.436216	0.820734	1	0.678202	0.801623	0.570216	0.821976
A2A3G7	0.210804	0	0	0	0.427162	0	1	0	0	0.255665	0	0	0	0.328566
A2IDC6;Q13084	0	0	0	0	0.132933	0.0448395	0.0621336	0.0304374	0.121246	0.212164	0.627867	1	0.872745	0.486066
A2RRP1	0.411795	0	0.117288	0.144061	0.225043	0.418036	1	0.879759	0.720787	0.75161	0.469044	0.576339	0.581608	0.503184
A2RTX5;B7ZLP8	0	0.226949	1	0.796367	0.539469	0.314829	0.779401	0.653461	0.505946	0.982938	0.72745	0.663858	0.867624	0.22562
A2RU37	0	0	0	0	0.741057	0.312374	0.185815	1	0	0.343973	0	0	0.0660229	0.0339745
A2RU49	0.590236	1	0.623798	0.488223	0.287097	0.218953	0.120395	0.144763	0.105246	0.137641	0	0	0	0.0433197
A2RUC4	0	1	0.501385	0.649033	0.481284	0.259387	0	0.171899	0	0	0	0	0	0
A2RUS2;A2RUS2-2;A2RUS2-4;E5RHH2;E5RI43;E5RIR7;E5RJ42;E9PF32;H0YAY3	0	0.0248299	0.0292551	0.0330222	0.0377772	0.0325329	0.0506544	0.0470139	0.0686479	0.20431	0.369691	1	0.997559	0.176946
A2VCT4	0	0	0	0	0	0	0	0	0	0	0	1	0	0
A2VDF0	0.594504	0.777557	1	0.34675	0.271263	0.242275	0.0900884	0.115407	0.0552033	0.128431	0	0	0	0
A2VDJ0;A2VDJ0-3;A2VDJ0-5	0	1	0.973863	0.467207	0.537095	0.337787	0.147437	0	0	0	0	0	0	0
A3KFL2;Q13868;Q13868-2;Q13868-3	0.693968	0	1	0	0.694334	0	0.164006	0	0.0869067	0	0	0	0	0
A3KMH1;A3KMH1-3	0.00110781	0.028601	0.00243546	0.00631804	0.0150041	0	0.0331026	0.0150516	0.065163	0.151748	0.386764	0.928358	1	0.585516
A3KN83;A3KN83-2;A3KN83-3	0.946948	1	0.713153	0.447467	0.507233	0	0.300497	0	0.342578	0.141389	0	0	0.260795	0.725329
A4D1E9	0	0	0	0	0	0.139886	0	0	0	0.250504	0.469591	0.514603	1	0.832728
A4D1P6	0.223635	0.609524	1	0.80728	0.580023	0	0.216608	0.287103	0.0645858	0.25997	0.188414	0.245235	0.429146	0.00465335
A4D1U4;C9J7X6	0.617933	0	0.351992	0.418189	0.337036	0.524943	1	0.543793	0.214181	0.548518	0.373175	0.338453	0	0.490178
A4D2B0	0.60825	1	0.734817	0.604867	0.458452	0.220873	0.0740024	0.146783	0	0	0	0	0	0
A5D8V6;F5H4Q5	0	0	0.678942	1	0	0.740699	0	0.294664	0	0	0	0	0	0
A5D8V7;A5D8V7-2;K7EN59;K7EPK8	0	0	0	0	0	0	0	0	0.204042	0.208158	0.92109	1	0.870945	0.310905
A5PLN9;A5PLN9-2;A5PLN9-4;A5PLN9-5	1	0.69327	0.696655	0.717509	0.927157	0.642999	0.497366	0.544273	0.344672	0.314498	0.169056	0	0.0343043	0
A5YKK6;A5YKK6-2	0	0.152137	0.043687	0.215691	0.258045	0.0828377	0.496508	0.444286	0.643121	0.996222	0.696763	0.871955	1	0.37609
A6NC78	0.0376834	0	0	0	0.0128191	0.0371719	0.11399	0.246182	0.325774	0.284439	0.425556	0.985503	1	0.749529
A6NCC9;C9JHT9;C9JJV1;E9PME3;Q9Y5U2;Q9Y5U2-2	0.362268	1	0.647397	0.477979	0.324353	0.32487	0.170489	0.14721	0	0	0.142145	0	0.0640918	0.058584
A6NCE7;H3BTL1;Q9GZQ8	0	0	0	0	1	0	0.718835	0	0.301354	0.076534	0	0	0	0
A6NCS6	0.369664	0	0.0501006	0.0387543	0.08111	0.179139	0.266961	0.607311	1	0.709155	0.696923	0.456523	0.433478	0.910887
A6ND36	0.814109	1	0.770072	0.536839	0.68571	0.582023	0.435048	0.494497	0.409956	0.319022	0	0	0	0
A6ND91	0.623529	1	0.666228	0.528214	0.35206	0.245428	0.134515	0.102962	0.0785828	0.136359	0.0702899	0.041476	0.046275	0
A6NDG6	0.557393	1	0.611219	0.421551	0.35909	0.275514	0.12106	0.0999407	0.0519553	0.045275	0.0214209	0.00910709	0.00414626	0
A6NDL8	0	0	0	0	0	0	0	0	0	0	1	0	0	0
A6NDR6
A6NDU8	0	0	0.885386	0	1	0	0	0	0	0	0	0	0	0
A6NE01;F5GYN0;F5H8C1	0	0	0	0	0	0	0	0	1	0	0	0	0	0
A6NED2;G3V2I3	0.62588	0	1	0	0	0	0	0	0	0	0	0	0	0
A6NEE1
A6NEL0;A6NL93;P05114	0.0569282	0	0.0432737	0.0437747	0	0.0988291	0	0.0207443	0.04036	0.00816041	0.0793208	0.150408	0.26707	1
A6NEL2	0.291473	0	0	0	0	0.142279	0.190623	0.30025	0.460783	0.552916	0.419326	0.618996	0.337259	1
A6NEM2;P51610;P51610-2;P51610-4	0.121326	0.225368	0.0763712	0.0218996	0.0787051	0.0160268	0	0.00221074	0.0303714	0.0338323	0.0886181	0.0998093	0.132575	1
A6NEY8	0.467369	1	0.515932	0.532596	0.498986	0.311811	0.11775	0.0755488	0.0143345	0.0545228	0.0508297	0.0350957	0.0190592	0
A6NF36	0	0	0	0	0	0.00694528	0	0	0	0.165419	0.357281	1	0.525408	0.581187
A6NFQ9;F8W8I8	0	0	0	0	0	0	0.26414	0	0	0	1	0	0	0
A6NFS0;Q9NSD4;Q9NSD4-2	0	0	0	0	0	0	0.321946	0.147264	0	0.399803	0	0	0	1
A6NFV8;D6RCT8
A6NFX8;Q9UKK9	0.651531	1	0.542327	0.508994	0.403228	0.330991	0.120305	0.15574	0.104764	0.0686404	0.0320051	0.00892981	0.0310907	0
A6NFY7	0	0	0	0	0.0181365	0.0239916	0.0124537	0.0225072	0.0554579	0.050445	0.384733	0.788449	1	0.667881
A6NG10;K7EIJ0;K7EMC9;K7ENL2;Q969T9	0.632369	1	0.797193	0.531234	0.889508	0.272061	0.0857992	0.147315	0.179036	0.0983802	0.0898037	0	0.0159991	0.0719151
A6NG31
A6NGA6;Q5H9D4;Q9Y5S8;Q9Y5S8-2;Q9Y5S8-3	0	0	0	0	0	0	1	0	0	0	0	0	0	0
A6NGJ0;P51808	0	0	0.375541	0	0.48816	0.647102	1	0.469321	0.834715	0.991153	0.254016	0.12469	0.307601	0
A6NGL4;P0CW00	0	0	0	1	0.128404	0	0	0	0.759367	0	0	0	0	0
A6NGN6;B1AJZ5;Q9NR34	0	0	0	0	0	0	0	0	0	0	0	1	0	0
A6NGQ3;Q5VST9;Q5VST9-2;Q5VST9-6	0.145112	0.041602	0.0309989	0	0.0580488	0.0436479	0.429184	0.393552	0.670985	0.895162	0.752004	1	0.760927	0.409433
A6NGU5;B5MCK8;P19440	0.16761	0	0.0313886	0.0763722	0.117669	0.155196	0.266768	0.391961	0.640052	0.594812	0.594644	0.43348	0.432284	1
A6NGW1;O95070	0.268562	0	0	0.114935	0.422936	0.554255	0.915733	1	0.752885	0.422573	0.210135	0	0	0
A6NH11	0	0	0.222154	0.308218	0.614946	1	0.917279	0.583198	0.364721	0.344954	0.269146	0.17386	0.17605	0.34251
A6NHG8;Q13114	0	0	0	0	0.332096	0.25107	0.708169	0.31258	0.482061	0.823224	0.472454	0	0	1
A6NHJ8;A6NND8;C9JAL0;C9K0F7;H7C3I5;O95825;O95825-2	0.434294	0.516311	0.868898	1	0.390377	0.681794	0.269473	0.368358	0.345118	0.522459	0	0	0.409403	0
A6NHR9;A6NHR9-2	0	0	0.876697	0.522237	0	0	0.0656969	0	0.15972	0.10124	0	0	0.256208	1
A6NI28;E9PJK4	0.569843	0	0	0	0.604353	0.592058	0.768748	0.743199	1	0.982534	0.532046	0	0.838727	0.532357
A6NI72;A8MVU1;C9J155;P14598;P14598-2
A6NIH7	0.845518	1	0.531709	0.337176	0.403518	0.441873	0.129451	0.122204	0.511476	0	0	0	0	0
A6NIT2;A6NMN0;P46020;P46020-2;P46020-3	0.382077	0.909707	1	0.521951	0.569318	0.487639	0.356763	0.220151	0	0.305788	0	0	0	0
A6NIV6	0.0596376	0	0	0.00235277	0	0.104555	0.876366	0.00728942	1	0	0	0	0	0
A6NIZ0;Q9GZM8;Q9GZM8-2;Q9GZM8-3	0	0.3731	0.93653	0.742403	0.902419	1	0.473358	0.476762	0.61132	0.332106	0.395132	0	0	0.233457
A6NJA2;P54578;P54578-2;P54578-3	0.459292	0.727581	1	0.741001	0.614756	0.331634	0.181758	0.181709	0.0479721	0.0872755	0.0590743	0.0450914	0.0848977	0
A6NK44;H7C348	0	0	0.284905	0.0786412	0.437509	0.167741	0.46785	0	0.430242	0.319135	0.374905	1	0.847697	0.210377
A6NKD9	1	0	0.429628	0.302369	0.269638	0.313468	0.249391	0.224248	0.400535	0.315324	0.57914	0.433097	0.413091	0.829398
A6NKN8	1	0.814945	0.74229	0.822972	0.549914	0.139369	0.0465379	0	0	0	0	0	0	0
A6NKZ2;P51606	0	0.445126	0	1	0	0	0	0.266726	0	0	0	0	0	0
A6NLH6;Q9P003	0.0873072	0	0.0688527	0.172587	0.250691	0.555869	1	0.838926	0.611355	0.545636	0.460068	0.525394	0.450535	0.437953
A6NLN1;P26599;P26599-2;P26599-3	0.0385933	0	0.0315739	0.0543999	0.0625218	0.101339	0.193616	0.204571	0.270414	0.316172	0.380615	0.357685	0.476773	1
A6NLP5	0.594619	1	0.719253	0.708854	0.434631	0.380534	0.159081	0.179682	0.085113	0.105158	0.112077	0.0259307	0.0269149	0
A6NMH6;Q92599;Q92599-2;Q92599-4	0.100954	0.210166	0.155014	0	0.147809	0.125283	0.219739	0.288045	0.470644	0.460397	0.292848	1	0.942773	0.526839
A6NMH8;E9PIF1;E9PJK1;E9PRJ8;H0YDJ9;H0YDL9;P60033	0	0	0	0	0	0.0491977	0.152412	0.138734	0.851658	1	0.269904	0.429873	0.284375	0
A6NML8;C9J6U3;O60879-2	0.716586	1	0.697063	0.694583	0.709783	0.464342	0.436111	0.352935	0.273098	0.324563	0.0850635	0	0.151096	0.00484266
A6NMQ3;O43768;O43768-2;O43768-3;O43768-4;O43768-9;Q5T5H1	0.681281	1	0.628113	0.478921	0.273099	0.300439	0.0903211	0.046165	0.0217691	0.0141682	0	0	0	0.0115876
A6NMV7	0.0299055	0	1	0.0169785	0.159834	0.236607	0	0.0853144	0	0	0	0	0	0
A6NMZ5	0	0	0	0	1	0	0	0.334099	0	0	0	0	0	0.71934
A6NMZ7;A6NMZ7-2	0	0	0	0	0	0	0	0	0	0	0	0	0	1
A6NN50;O75147;O75147-1;O75147-2;O75147-4	0	0	0	0.376311	1	0.218909	0.958182	0.699843	0.183907	0.313915	0	0	0	0
A6NNK5;Q12888;Q12888-2;Q12888-3	0	0	0	0	0	0	0	0	0	0	0	0.30723	0	1
A6NP16;E7ERM3;Q4VCS5;Q4VCS5-2	0	0	0	0	0.0693679	0	0.288465	0	0.725088	0.827406	0.788918	0	0	1
A6NP52;O60831	0.0763366	0	0.0877162	0.0946486	0.223535	0.465886	0.959462	1	0.766789	0.670513	0.447046	0.31996	0.262903	0.358498
A6PVD3;P48436;P56693;P56693-2;P57073
A6PVK5	0	0	0.809091	0	1	0	0.70453	0.106743	0.397468	0.127399	0.342693	0	0	0
A6PVP4;B7ZBQ1;B7ZBQ3;Q9H944;Q9H944-2
A6PVU8;Q6UWW7;Q9NNX1;Q9NNX1-2;Q9NNX1-3
A6PVY1;A6PVY2;A6PVY3;A6PVY3-2
A6PW57;Q99755;Q99755-3;Q99755-4	0	0	0	0	0	0	0	0	0	1	0.350239	0	0	0
A6PWM2;Q6UXH1;Q6UXH1-2;Q6UXH1-3;Q6UXH1-4;Q6UXH1-5;Q6UXH1-6	0	0	0	0.0460592	0.0979678	0.328463	0.768348	1	0.743827	0.366089	0.502988	0.31373	0.564715	0.246751
A6QRJ0;P49184
A6XND0;A6XND1;B3KWK7;C9JMX4;H0Y5K2;P17936;P17936-2	0	0	0	0	0.116344	0.656014	0.428423	1	0.76874	0.721876	0.645433	0.755076	0.0969116	0.694547
A7E2V4;A7E2V4-3;A7E2V4-4;A7E2V4-5;S4R393;S4R410	0	0.529113	1	0.595182	0.667059	0.58552	0.548413	0.434504	0.506773	0.664124	0	0	0	0
A7KAX9;A7KAX9-2	0.487088	0.511552	0.570302	0	0.550533	0.830233	0.627445	0.218333	0.386194	1	0	0	0	0.50823
A7MCY6	0	0	0	0	0	0	0	0	0	0	1	0	0.874889	0
A7XZE4;Q3SX28
A8CG34;A8CG34-2	0	0	0	0	0	0	0	0	0	0	0	0	0	1
A8DPD7;Q9C0D3	0	0	0	0	1	0.940808	0	0	0.765364	0	0	0	0	0
A8K7Q2
A8MPP7;A8MPY5;E7ETV6;Q9UPE1;Q9UPE1-2;Q9UPE1-3;Q9UPE1-4	1	0	0	0	0	0	0	0	0	0	0	0.324196	0	0.0731579
A8MQ02	0.187852	0	0.151719	0.120054	0.215933	0.170094	0.241517	0.208257	0.500591	0.659263	0.586847	0.598011	0.834361	1
A8MQB8;G3V0J0;Q06787-2	0	0	0	0	0.150751	0	1	0.369282	0.83471	0	0	0	0.967701	0
A8MSI8;D6RAR2;D6RFL2;J3KTA2	0	0	0	0	0	0	0	0	0	0	0	0	1	0
A8MSY1;C9JYJ2;Q8IVN3	1	0	0	0	0	0	0	0	0	0	0	0	0	0
A8MT69;A8MT69-2;A8MT69-3;J3QR01;J3QRS1
A8MTT3	0	0	0	0	0	0	0.251682	0	0	0.458346	1	0.955392	0.902786	0.687391
A8MU21;Q9BVK8;Q9BVK8-2
A8MUM1;Q53HC9	0.95533	0.807914	0.845952	0.963943	1	0.903708	0.459337	0.610784	0.389089	0.519522	0.652932	0	0.36339	0.205116
A8MV81	0	0	0	0	0	0	0	0	0	1	0	0	0	0
A8MVV6;E9PN41;E9PPX8;E9PSH3;J3KQ42;O14817	0	0	0	0	0	0	0.378936	0.377815	0.530493	0.675681	0.373615	0.273124	0.519477	1
A8MVZ6;Q96G01;Q96G01-3;Q96G01-4	0	0	0	0	0	0	0	0	1	0	0	0	0	0
A8MWD9;F5H013;P62308;Q49AN9	0.0595045	0	0.0873885	0.0890655	0.151289	0.170545	0.0605522	0.0924746	0.123573	0.107729	0.163287	0.144169	0.221414	1
A8MXB7	0.61163	1	0.916971	0.683213	0.612673	0.475268	0.515034	0.227111	0.38028	0.120719	0.187821	0	0.160389	0.108013
A8MXP9	0	0	0	0	0	0	0	0	0	0	0	0	0	1
A8MXV4	0.104143	0.088509	0.0536172	0.0392406	0.0173701	0	0.0284283	0.0123607	0.0946846	0.160229	0.453734	1	0.779094	0.422116
A8MYA3;J3KQ25;Q8N6M9	1	0	0.360893	0.346162	0.716128	0	0	0	0	0	0	0	0	0
A8MYU2;E5RHP1
A8MYZ0
A8TX70;A8TX70-2;E9PAL5	0	0	0	0	0	0	0	0	0	1	0	0	0	0
A9X3U0;Q96GF1	0.548431	0.566067	0.454886	0.31588	0.447081	0.52043	0.680831	1	0.415366	0.7463	0.8405	0	0.401667	0.613262
A9Z1X7;E9PCT1;Q8IYB3;Q8IYB3-2	0.0836881	0	0.0587995	0.288641	0.134296	0.200075	0.169518	0.109504	0.155628	0.188918	0.211177	0.253543	0.326772	1
B0QY89;Q9Y262	0.020872	0	1	0.982528	0.832112	0.601346	0.767912	0.656241	0.561763	0.457072	0.445502	0.360887	0.379789	0.311799
B0QY95;Q9NQG6	0	0	0	0	0.30932	0.184183	0.313675	0.430477	0.436734	0.692171	0.522723	1	0.868655	0.460622
B0QYF8;P02144	0	1	0.426565	0.402746	0.260068	0	0	0	0	0	0	0	0	0
B0QYK0;Q01844;Q01844-3;Q01844-5;Q01844-6	0	1	0.607167	0.805093	0.323647	0.406408	0.351642	0.280539	0.256046	0.103978	0.181069	0.123956	0.431591	0.69389
B0QYN7;H3BQQ9;P63279	0.704504	1	0.402599	0.385121	0.257501	0.561405	0.248539	0.172985	0.122433	0.0610826	0.0388312	0.00601513	0	0.147756
B0QYP2;O95931	0	0	0	0	0	0	0	0	0	0	0	0	0	1
B0QYW5;F6RTR7;O43808	0	0	0	0	0	0	0.0563531	0.0872914	0.181575	0.663465	0.736317	0.737428	1	0.278324
B0QZ18;F2Z2V0;Q99829	0.660728	1	0.560207	0.340848	0.304765	0.237024	0.129264	0.11444	0.0715457	0.0751486	0.0288782	0	0.000506454	0.0111398
B0QZA9;Q6QHF9;Q6QHF9-4
B0YIW2;P02656	0.244349	0	0.0388389	0.404324	0.665639	0.920392	1	0.974843	0.396768	0.432491	0.231298	0.361224	0.487273	0.104731
B1AH77;B1AH80;P15153	0	0	0	0	0	0.183169	0.36817	0.545015	0.747225	0.378546	0	1	0	0
B1AH87;P30536	0	0	0	0	0.0269867	0.0492942	0.0809763	0	0.0983909	0.232794	0	1	0.557005	0.411779
B1AHA8;P09601	0.0726049	0.0376752	0	0.210566	0.309977	0.559935	0.895288	1	0.995025	0.789963	0.795235	0.87007	0.674515	0.379901
B1AHB1	1	0.140007	0	0	0.116365	0.117461	0	0.111592	0	0	0	0	0.0091142	0
B1AHL2;P23142;P23142-2;P23142-3;P23142-4	0.532262	1	0.650296	0.558712	0.291686	0.253702	0.174173	0.0744516	0.0454605	0.109925	0.0691284	0.137134	0	0.0533747
B1AHR2	0.867488	0.585393	0.552457	1	0.443817	0.314579	0.114488	0.222878	0.286664	0.336148	0	0.361428	0.215664	0.337182
B1AJQ6;Q86Y82	0.190781	0	0.0950965	0.317692	0.605365	0.823582	1	0.763892	0.642069	0.458769	0.640071	0.200906	0.156429	0.423749
B1AJS1;O14525;O14525-2;O14525-3	0	0	0	0	0	0	0	0	0	0	0	0	0	1
B1AK53	0.931497	1	0.647919	0.464084	0.323838	0.350236	0.337084	0.229112	0.613075	0.554195	0.154163	0.358725	0	0.40179
B1AK61;Q5VTY9;Q5VTY9-2;Q5VTY9-3;Q5VTY9-5;Q5VTY9-6;Q5VTY9-7	0	0	0	0	0	0.697951	0	0	0	1	0	0	0	0
B1AK88;P47756-2	0.782	1	0.783457	0.422517	0.380739	0.376738	0.10225	0.28102	0.237673	0.235165	0.157225	0.0657203	0	0.118656
B1AKC9;P29323;P29323-2;P29323-3	1	0.791038	0.264748	0.371913	0	0	0	0	0	0	0	0	0	0
B1AKG0;Q03591	0	0	0	0	0.221135	0.653558	0.88211	0.746106	1	0.623604	0.399028	0.567655	0.471729	0
B1AKI6;Q9NUK0;Q9NUK0-2	0.712173	0.389784	0.468164	1	0.398399	0.87993	0	0	0	0	0	0	0	0
B1AKL4;Q9NRA8;Q9NRA8-2;Q9NRA8-3	0	0	0	0	0	0	0.907914	1	0	0	0	0	0	0
B1AKR6;Q9NP97	0.0856017	0.289489	0.794985	1	0.890547	0.614476	0.185501	0.174372	0.129118	0.0664173	0.080162	0.0615827	0.159348	0
B1AL05;H0Y6Y8;Q8N983;Q8N983-2;Q8N983-3;Q8N983-4;Q8N983-6;Q8N983-7	0.0314031	0	0.0589573	0.0398683	0.0810958	0.131449	0.0431937	0.124624	0.237986	0.199777	0.86442	0.867412	1	0.604302
B1AL69;Q7L3B6	0.472532	1	0.776571	0.646356	0.721344	0.336255	0.166175	0.152491	0.112157	0.0685727	0.0224062	0	0	0
B1ALA9;P60891	0.207971	0.310056	1	0.714783	0.585309	0.366996	0.233214	0.15057	0.0787255	0.0570584	0.0368024	0	0.0416966	0.00548401
B1ALD1;Q9Y6B7	0	0	0	0.340151	1	0.548862	0.517095	0.602654	0	0	0	0	0	0
B1ALM5;Q9P0T7	0.155164	0	0	0.303141	0.448107	0.94891	0.693337	1	0.314971	0.35882	0.321489	0.200495	0.163996	0.362583
B1ALY0;Q8IXS6-2	0.426124	1	0.507723	0.539953	0.471499	0.179004	0.118886	0.0675188	0.0645216	0.0717608	0.0427655	0.00286073	0.0453548	0
B1AM21	0.041066	0.1057	0.146106	0	0	0	0.0187863	0	0	0.0817869	0	0.347287	1	0.335752
B1AM27;O14795;O14795-2	0.355069	1	0.823632	0.897562	0.892678	0.388855	0.332139	0.394221	0.276904	0.332544	0.0341257	0.112805	0	0.0094933
B1AMI2	0	0	0	0	0	0	0	0	0	0	0.440445	0.443704	1	0.406691
B1AMN7;Q9P2B4	0	0	0.190627	0.126294	0.246763	0.205169	0.289232	0.289608	0.643468	0.457396	0.731376	0.643417	0.776778	1
B1AMS2;Q14141;Q14141-2;Q14141-4	0.0192624	0.339592	0.00540837	0	0.0260662	0.226478	0.272135	0.307145	0.331666	0.368128	0.35687	0.625945	1	0.729701
B1AMT9;B1AMU0;B1AMU5;Q969W1;Q969W1-2;Q969W1-3;Q969W1-4
B1AMW1;H0YDI1;P19256;P19256-2;P19256-3	0	0	0	0	0	0.231987	0	0	0.700885	0.67391	0	0	0	1
B1ANE6	1	0.333941	0	0	0	0	0	0	0	0	0	0	0	0
B1ANH0;B1ANH2;Q16774;Q16774-2	1	0.766683	0.693928	0.613229	0.449683	0.194056	0.148613	0.038525	0	0.00948386	0.200432	0.425083	0.672463	0.415178
B1APN9;O75335	0	0	0	0	0	0	0	1	0	0	0	0	0	0
B1APR7;Q99504;Q99504-2;Q99504-3;Q99504-4;Q99504-5	0	1	0	0	0	0	0	0	0	0	0	0	0	0
B1AQK6;B1AQK7;E9PDR3;F6RH32;Q00975;Q00975-2	0	0	0	0	0	0	0	0	0	0	0	0	0	1
B1AQP5;O75618;O75618-2;V9GY27	0	0	0	0	0	0	0	0	0	0	0	0	0	1
B1AVT0;P49760;P49760-3	0	0	0	0	0	0	0	0	0	0	0	0	1	0
B1AXG1;B4DG22;B7ZB17;P51812	0.558251	1	0.594376	0.425541	0.3456	0.159976	0.199013	0.123063	0.0702996	0.0878131	0.032242	0.0410532	0	0.0515206
B1B0D4;Q86TH1	0	0	0	0	0	0	0	0	1	0	0	0	0	0
B2RC85;B2RC85-2;H0YFY2;P0C881	1	0	0	0	0	0	0	0.220881	0	0	0	0	0	0
B2WTI3;B2WTI4;K7EJU9;Q6NYC1;Q6NYC1-2;Q6NYC1-3	0.524004	1	0.600186	0.306168	0.6369	0.36987	0.200093	0	0	0	0	0	0	0
B3EWG3;B3EWG5;B3EWG6	1	0.788214	0.470754	0.402533	0.103051	0	0.064889	0	0	0	0	0	0	0
B3KP42	0.769703	0	0	0	0	0	0	0	0	0	0	0	0	1
B3KP96;H0Y626;J3QKY5;K7EL43;K7ENN8;O95361;O95361-2	0	0	0	0	0	0.416375	1	0	0.532552	0	0.703858	0	0	0.00855146
B3KS81	0	0	0	0	0	0	0	1	0.580533	0	0	0	0	0
B3KT41;Q496J9	0.34506	0	0.607246	0	1	0.416664	0.787099	0	0	0	0.49599	0	0	0
B3KTM8;H0YLJ3;Q9UBU8-2	0.095718	0	0	0.16545	0.114196	0	0	0.0734767	0.256991	0.172901	0.512684	0.255493	0.536673	1
B3KUS5;Q70CQ3	0	0	0	0	0	0	0.0463826	0.0408588	0.248178	0.266427	0.645896	1	0.342331	0
B3KVY5;F5GWA4;F5GWK6;F5H268;Q9H3F6;Q9H3F6-2;Q9H3F6-3	0	0	0.043806	0	0.0909391	0.150413	0.31421	0.263508	0.523671	1	0.47116	0.430852	0.616374	0.720406
B3KY94;O14735;O14735-3	0.0981694	0	0	0.135136	0.25984	0.397065	0.601903	1	0.506098	0.448361	0.501468	0.301194	0.254375	0.378156
B4DDD6	0.759625	1	0.607436	0.640431	0.614248	0.220972	0.146834	0.139424	0.256236	0.140765	0.123518	0	0.124728	0
B4DDF4;B4DUT8;Q99439	1	0.427543	0.340097	0.146178	0.718064	0.165081	0.159601	0.132784	0.160166	0.00175955	0.146939	0	0	0
B4DEE8;P16455	0	0.6856	0.139866	0.39096	0.404093	0.390757	0.820454	0.486107	0.642685	0.682697	0.195105	0.282077	0.537572	1
B4DEN4;B8ZZ56;E7EV05;E9PFU9;Q8WV99;Q8WV99-2	0	0	0	0	0	0.774883	0.510324	0.188109	1	0.793369	0	0	0	0
B4DFC0;E9PMV6;E9PR50;G3V1B4;H0YD20;H0YE53;H0YEL8;Q9UGK8;Q9UGK8-2	1	0.464994	0	0.309475	0	0.27084	0	0	0	0	0	0	0	0
B4DFG5;K7EMR4;K7EMW3;Q9BZJ4;Q9BZJ4-2
B4DI03;K7EJQ7;Q9BY50	0	0	0	0	0.792002	0.324603	0.511999	1	0.88429	0.470377	0.383135	0.551616	0.436536	0.581723
B4DJ07	0	0	0	0	1	0	0	0	0	0	0	0	0	0
B4DJC3	0	0	0	0	0	0	0	0	0	0	1	0	0	0
B4DJV2;O75390	0.0495628	0.0808371	0.0426031	0.0242967	0.0163184	0	0.0134973	0.0306902	0.054958	0.132825	0.424837	1	0.861582	0.495622
B4DJV5;Q13610	0.420082	0.653748	1	0.795655	0.799147	0.622445	0.36202	0.360735	0.369606	0.360926	0.212141	0	0	0
B4DK77;Q9H6K4	0	0	0	0	0	0	0.119846	0.0902852	0.153886	0.232877	0.451059	1	0.638509	0.627353
B4DL54	0.62323	1	0.513133	0.21666	0.444633	0.205416	0.352092	0.314574	0.211595	0.0677022	0	0	0	0
B4DLJ1	0.129092	0	0	0	0.120358	0.0784932	0.088104	0	0	0	0	0.31021	0	1
B4DLN1	0	0	0	0	0	0	0.11687	0.086041	0.0597189	0.0618735	0.414396	1	0.570645	0.369262
B4DLP0;B8ZZF7;O00338;O00338-2	0.740107	1	0.355486	0.349321	0.237361	0.224491	0.11085	0.04198	0.0621754	0	0.949655	0.70644	0.151529	0.168043
B4DR61;P61619	0.0360748	0.0033239	0	0.0115416	0.0375628	0.0746053	0.12377	0.225912	0.276817	0.394109	0.506475	0.914626	1	0.682018
B4DR80;Q9Y6E0;Q9Y6E0-2	0.797729	1	0.383876	0.6269	0.67776	0.55215	0.370982	0.597888	0.885248	0.596703	0.431915	0	0.167605	0.163613
B4DUC8;Q13126	0.66765	1	0.706772	0.472841	0.457534	0.334244	0.148365	0.137464	0.0748451	0.0990492	0.0270637	0	0	0
B4DUJ5;Q8IWP9	0	0	0	0	0	0.259701	0.653477	0.629707	0.766865	1	0.45106	0.642486	0.282021	0.364969
B4DVL7;Q9NQ25-3;Q9NQ25-4;Q9NQ25-5	0	0	0	0	0	0	0	1	0	0.114906	0	0	0	0
B4DVN3;E7ESC7;Q7L5Y9;Q7L5Y9-3	0.180673	0.531217	1	0.622179	0.443111	0	0.344998	0.0790807	0.036016	0.351783	0.106929	0.660037	0.641312	0.578152
B4DVT3;Q96SY0	0.175981	0	0	0.21282	0.36661	0.166871	0.202252	0.161081	0.248929	0.130831	0.246377	0.394615	0.265718	1
B4DXU5;B5MBY7;E9PID2;E9PLL4;M0R0K3;M0R2F9;P55055;P55055-2;Q13133;Q13133-2;Q13133-3	0	0	0	0	0	0	0	0	0.058328	0	0	0	0	1
B4DXZ6;P51114	0.0715038	0	0	0.0893019	0.142165	0.306046	0.495066	0.479561	0.834906	1	0.936122	0.623172	0.756807	0.577904
B4DYU2;H3BQV3;Q96MW5	0.800669	1	0.830256	0.653826	0.739321	0.580334	0.480787	0.362791	0.254277	0.370039	0.18323	0	0	0
B4DYY6;Q75T13;Q75T13-2;Q75T13-3	0	0	0	0	0	0	0	0	1	0	0	0	0	0
B4E0E3;G3V1M5;Q9H6X4;Q9H6X4-2;Q9H6X4-3	0.0107368	0	0.0580545	0.150755	0.583279	0.744934	0.823965	0.444514	0.318009	0.783481	0.640525	0.459233	0.41389	1
B4E0T2;P50542;P50542-4	0.673889	1	0.696386	0.512075	0.701078	0.19215	0	0.155158	0.466758	0.505104	0.850068	0.701205	0.504351	0.271696
B4E0Y9;Q8NBY1;Q9P289	0.810081	1	0	0	0.353473	0.485653	0	0	0	0	0	0	0	0
B4E107;F5GXE4;O95260-2	0.653164	1	0.574798	0.496462	0.44914	0.211997	0.107141	0.175728	0.0536169	0.0927439	0	0.0558226	0	0
B4E1G1;Q9BUN8;Q9BUN8-2	0.0615898	0	0.0435378	0.0650117	0.16617	0.357463	1	0.940863	0.461835	0.502223	0.246221	0.199035	0.184888	0.358697
B4E1Q4;O14730	0.256394	0.4634	1	0.832459	0.797654	0.59642	0.386295	0.141437	0.157526	0.200888	0.0150832	0.142277	0.143987	0
B4E1Z4	0	0.192681	0.0188172	0.0683503	0.264318	0.459283	0.935255	0.75793	1	0.69948	0.444002	0.854418	0.427878	0.362422
B4E2Q0;P98194;P98194-4	0	0	0	0.374976	0.443732	0.983729	1	0.411279	0.46923	0.504339	0	0	0	0
B4E3T4;Q93062;Q93062-2;Q93062-3;Q93062-4;Q93062-5	0.435927	0.0827085	0.879178	0.74036	0.588752	1	0.249287	0.3556	0.46614	0	0.729897	0.242338	0.41889	0.872135
B5MBZ0	0	0	0	0	0.984947	0.564874	0.622136	1	0.944917	0	0	0	0	0
B5MC20;P0C870	0	1	0	0	0	0	0	0	0	0	0	0	0	0
B5MC22;Q9UDX5	0	0	0	0	0	0.0320213	0.119019	0.0924636	0.128967	0.26845	0.373307	1	0.808938	0.747117
B5MC35;B5MCA1;B5MD16;Q96G28;Q96G28-2	0.375244	0	0.514676	0.472971	0.436087	0.398517	0.323339	0.319774	0.163867	0.0853057	0.0109584	0.215619	0.189234	1
B5MC53;B5MCF8;E7EX18;G5E9F5;P39210	0	0	0	0	0	0	0	0.0361742	0.16302	0.281651	0.58774	1	0.782561	0.279449
B5MCF4;C9JDC5;P05230;P05230-2	0.556271	1	0.375766	0.313173	0.326244	0	0	0	0	0	0	0	0	0
B5MCF9;O00541;O00541-2	0.0747978	0	0	0	0.0731623	0.0652224	0.0771706	0.0639925	0.0779377	0.11145	0.0486502	0.162954	0	1
B5MCN7;Q15788;Q15788-2;Q15788-3	0	0	0	1	0	0	0	0	0	0	0	0	0	0
B5MCQ6;B5MCU6;B5MCV5;E7ETT9;Q96DB2;Q96DB2-2	1	0	0	0	0	0	0	0.375334	0.254812	0.383371	0	0.473091	0.278378	0.308242
B5MCX7;C9JX82;D3YTC9;F8WB76;H7C3L3;Q6NXT1;Q6NXT1-2	1	0	0.279725	0	0	0.454425	0	0	0	0	0	0	0	0
B5MDF5;J3KQE5;P62826	0.698224	1	0.527784	0.315856	0.176046	0.162607	0.0838383	0.0697497	0.0407619	0.0507246	0.0154579	0	0.0435157	0.0130374
B5MDL5;P53778;P53778-2	0.764944	1	0.599836	0	0	0	0	0	0	0	0	0	0	0
B5MDU6;Q9H6V9;Q9H6V9-2	1	0.0312186	0	0.0327222	0.0849858	0.298762	0.642143	0.786041	0.723996	0.492867	0.351252	0.413406	0.503178	0.334671
B5ME97;E7EW69;E7EX04;Q9P0V9;Q9P0V9-2;Q9P0V9-3	0.179736	0.196924	0	0.0463747	0.107587	0.111174	0.228087	0.213649	0.331087	0.445604	0.672436	1	0.935947	0.922505
B5MEF5;Q8TER0;Q8TER0-3;Q8TER0-4;Q8TER0-5	0	0	0	0	0	0.15392	0.282268	0.70716	1	0.690451	0.460922	0.413018	0.300628	0.731087
B7WNH4;E9PLH2;E9PNA8;E9PP42;M0QYU9;M0R0R3;M0R2G5;Q9BQ49	0	0	0	0	0	1	0	0	0	0	0	0	0	0
B7WNR7;Q5HYL7-4	0.615054	1	0.585041	0	0.319178	0.116494	0.27935	0	0.0152931	0.523902	0.471605	0.321779	0.752987	0.219747
B7WP74;Q9HCG8	0.122284	0	0.122957	0.15428	0.0790373	0.0720159	0.132789	0.126813	0.166768	0.225917	0.177732	0.225936	0.287361	1
B7WPE2;Q32P44	0.674651	0.993578	1	0.859171	0.628685	0.518622	0.383329	0.355685	0.368098	0.36874	0.25849	0.392594	0.363634	0
B7WPG3;C9IYN3;Q8WVV9;Q8WVV9-4;Q8WVV9-5;V9GYK2	0.249259	0.386883	0.0669375	0.166506	0	0.0134156	0.0533838	0.0791856	0.2024	0.275321	0.195783	0.300635	0.550483	1
B7WPL0;Q9NVN3;Q9NVN3-1;Q9NVN3-3	0	0.501724	1	0.472424	0.919281	0.618925	0.432874	0.47674	0.259677	0.254695	0.178965	0	0	0
B7WPL9;F8W9A8;Q6PFW1;Q6PFW1-2;Q6PFW1-3;Q6PFW1-4;Q6PFW1-5;Q6PFW1-6;Q6PFW1-7
B7Z1G8
B7Z278;Q8WZA2;Q8WZA2-2;Q8WZA2-3;Q8WZA2-4;Q8WZA2-5	0.200879	1	0.293071	0.507288	0.324426	0	0.230612	0.179914	0.140867	0.356152	0.176903	0.23575	0.28921	0.184056
B7Z2D2;H7C4Y6;Q8NHQ1;Q8NHQ1-4;Q8NHQ1-5	0	0	0	0	0	0	0	0	0	0	0	0	1	0
B7Z2R2;P14927;P14927-2	0.0317672	0	0.0109531	0.0167145	0.0213117	0.0361289	0.0839143	0.0940716	0.174829	0.185498	0.700935	0.881721	1	0.530542
B7Z2R7;Q5T8D3;Q5T8D3-2;Q5T8D3-3	0.0716322	0.000474576	0.028047	0.0169926	0.0855954	0	0.0665697	0.136876	0.262947	0.479944	1	0.763766	0.640773	0.370833
B7Z493;E9PJX4;F8VWL3	0.858848	1	0.629428	0.271544	0.344243	0.0125185	0	0.0866765	0.310547	0.370895	0.168412	0.157529	0.388497	0.130635
B7Z4L1;B7Z4U3;E7EPD9;E7EPW5;E9PCV1;G3XAH9;H7BXS2;Q9NRC1-2;Q9NRC1-3;Q9NRC1-4;Q9NRC1-5;Q9NRC1-6	0	0	0	0	0	0.153005	0.307199	0.471707	0.49152	0.672273	0.593312	1	0.858356	0.59744
B7Z4S1	0.431637	0.304584	1	0.842693	0.692985	0.0928414	0.321364	0.242645	0.198391	0.0214128	0.0542717	0.0228353	0	0
B7Z4W8;E9PD09;Q96HH9;Q96HH9-2;Q96HH9-3;Q96HH9-4;Q96HH9-5	0	0	0	0	0	0	0.920866	1	0.306415	0.799678	0	0	0	0.432362
B7Z5P7;O60711;O60711-2	0	0	0	0	0	0	0	0	1	0	0	0	0	0
B7Z5R6;Q14596;Q14596-2
B7Z6D5;Q96GQ7	0.0360783	0	0	0	0	0	0.0329568	0.0502655	0.0438132	0.058661	0	0	0	1
B7Z6J7;H7C148;O75175	0.00531532	0.275171	0.450642	0.644097	1	0.811002	0.680649	0.561825	0.526539	0.806199	0.687293	0.586188	0.750769	0
B7Z6Q0;Q12980	0	0	0	0.669492	0.182529	0	1	0.385183	0.682854	0.702117	0	0	0	0
B7Z7D2;E9PQY3;P11117	0.153954	0	0.119081	0.0751856	0.246899	0.583596	0.869172	1	0.919943	0.338307	0.349009	0.0673635	0.156462	0.142926
B7Z7P8;P62495;P62495-2	0.533062	1	0.510982	0.252969	0.293327	0	0.0598121	0.0694573	0.260955	0.0671746	0.170028	0.386874	0.311836	0.221965
B7Z8H2;O14717;O14717-2;O14717-3;O14717-4;O14717-5;O14717-6;Q7Z3E4	0.374357	0	0	0	1	0.336478	0.262279	0	0	0	0	0	0	0
B7Z8Q8;Q6NUS8	0.224017	0	0	0.0263136	0.139234	0.384965	1	0.986406	0.833885	0.816919	0.886392	0.979058	0.847484	0.618665
B7Z8V7	0	0	0	0	0	0	0	0	0	0	0	1	0	0.641659
B7Z9C2;F5H4R6;F8VV59;F8VY35;F8W020;F8W0J6;F8W118;F8W543;H0YH88;H0YHC3;H0YIV4;P55209;P55209-2	0.388485	1	0.767618	0.944285	0.732407	0.5079	0.113452	0.224439	0.189927	0.0469542	0	0.0909948	0	0.0349865
B7Z9I1;P11310;P11310-2;Q5T4U5	0.164728	0.155457	0.09775	0.0474046	0.0453545	0.0245378	0	0.00517812	0.0435021	0.063596	0.369311	0.922007	1	0.868892
B7ZAP0;F5H8L0;Q5R372-5;Q5R372-6;Q5R372-7;Q5R372-8	0.384506	1	0.532509	0.473726	0.28575	0.203072	0.220087	0.203548	0.139588	0.170075	0	0	0	0.0793274
B7ZAQ6;B7ZAQ6-2;B7ZAQ6-3;P0CG08	0.299719	0	0.017947	0.669305	0.382606	0.596198	0.723231	1	0.523531	0.37016	0.32873	0	0	0
B7ZBB8	1	0.334534	0.493933	0.45536	0.423964	0.150676	0.144946	0.108483	0.161835	0	0	0	0	0
B7ZBC8;B7ZBC9;O75449
B7ZC38;Q9NR46	1	0.795449	0.545371	0.679908	0.455769	0.496377	0.385745	0.305786	0.291733	0.238754	0.152396	0.0928566	0.122714	0
B7ZKP5;H0Y3A8;O75129;O75129-2;O75129-3;O75129-4;O75129-6	0	0	0	0	0	1	0	0	0	0	0	0	0	0
B7ZKQ9;Q8WTV0-2;Q8WTV0-4	0.278251	0	0.0366858	0.0650973	0.101695	0.204734	0.295537	0.607371	1	0.848371	0.733549	0.453423	0.389415	0.901878
B7ZL48;C9J7L3;Q460N3;Q460N3-2	0	0	0	0	0	0	0.798964	1	0	0.371024	0	0	0	0.236415
B7ZL88;Q8N8Q8	0.0177342	0	0	0	0	0.0250208	0.108287	0.131638	0.149289	0.200186	0.483515	1	0.719453	0.540087
B7ZLQ8;E5RJM0;Q17RY0;Q17RY0-2	0	0	0	0.121411	0.361351	0.428622	0.731899	0.510888	0.132104	0.896155	1	0.352364	0.201966	0.597439
B8ZZ19;H0Y3U0;P20472	0.57804	1	0.539911	0.495674	0.150823	0.14104	0.0710651	0.0390621	0	0	0	0	0	0
B8ZZ47;H0Y714;Q96G21	0	0	0	0	0	0	0	0	0	0	0	0	0	1
B8ZZ50;B9A044;C9JEL3;O60573;O60573-2	0	0	0	0	0.610926	0	0.751509	0.604375	0.801159	0.865076	0.510896	1	0.805629	0.816401
B8ZZ98;Q8WVK2	0	0	0	0	0	0.183046	0	0	0	0	0	0	0.218856	1
B8ZZ99;F8WCZ3;Q96NT0;Q96NT0-2	0	0	0	0	0	0.471533	1	0.422039	0.27109	0.551902	0.392933	0.282384	0.175706	0.328826
B8ZZD4;Q86VP1;Q86VP1-2;Q86VP1-3;Q86VP1-4	0.462722	0	0	0.0554023	0	0.100222	0.170679	0.164267	0.292638	0.35049	0.895392	1	0.69217	0.619201
B8ZZF5;C9J5M4;Q9H8M9	0.308468	0	0.0232883	0.0419795	0.0847029	0.136255	0.333431	0.3534	0.582838	0.604327	0.687268	0.617804	0.364719	1
B8ZZJ6;H7C1S9;Q8TD22	0.0518667	0	0.0215493	0.0235015	0.0210371	0.0483749	0.111574	0.1547	0.230607	0.258471	0.518032	1	0.850966	0.617432
B8ZZK5;O43924	0.581429	1	0.776895	0.590371	0.3321	0.363911	0.20378	0.166084	0	0	0	0	0	0
B8ZZQ6;P06454;P06454-2	0.403399	1	0.15621	0.101705	0.0866132	0.0391233	0.01964	0.0284884	0.0165001	0.00996293	0.00379953	0	0	0
B8ZZU8;Q15370;Q15370-2	0.450463	1	0.63546	0.425513	0.594238	0.350971	0.0995493	0.162194	0.150069	0.063669	0.0911922	0	0.0306805	0.0123742
B8ZZV9;B8ZZX2;Q9H8M1;Q9H8M1-2	0	0	0	0	0	0	0	0	0	0	0.397716	1	0.773373	0.592526
B8ZZY8
B8ZZZ1;F8W8K9;G5E966;Q96PC3;Q96PC3-2;Q96PC3-3;Q96PC3-4	0	0	0	0	0	0	1	0.499997	0.383994	0	0	0	0	0
B9A057;Q86WW8	0	0	0	0	0.129238	0.383293	0.238483	0.407632	0.232159	0.164538	0.938073	0.542943	1	0
B9EGA3;J3KMX2;Q92925;Q92925-2;Q92925-3	0	0	0.0634089	0.0221097	0	0.0253471	0.0590871	0.0461103	0.110944	0.146534	0.166512	0.263455	0.220525	1
B9EJG8;B9EJG8-2;D6RAQ9;D6RDW6	0.96422	0	0	0	0.733848	0.900964	0.839611	0.977833	1	0.875348	0	0	0	0.513024
B9TWZ6;K7EKS6;Q9Y2X0;Q9Y2X0-2;Q9Y2X0-3;Q9Y2X0-4;Q9Y2X0-5;U3KQ43;U3KQB4	0	0	0	0	0	0	0	0	0	0	0	0	0	1
B9ZVN9;O95602	0	0	0.109128	0	0.257395	0	0	1	0.63504	0.295479	0.360998	0.259771	0	0.886489
C4AMC7;Q6VEQ5	0.308806	0.251127	0.280925	0.640839	0.694975	1	0.92291	0.450698	0.163566	0.234939	0.0628281	0	0.0696199	0.149155
C4B7M2;Q96JI7;Q96JI7-2;Q96JI7-3	0.979786	0.441616	0.104644	0.153123	0.357398	1	0.297502	0.577979	0.206418	0.245787	0.0378813	0	0.119699	0.0922583
C4P0D6;C4P0D8;Q99598	0.555404	1	0.777049	0.539529	0.484706	0.336473	0.191532	0.163349	0.0857991	0.0747248	0.0540772	0	0	0
C9IYN7;C9J2D6;C9J9N8;C9JA82;C9JEX8;C9JLH5;Q0PNE2;Q0PNE2-2	0.362687	0.895093	0.627565	1	0.56631	0.523173	0.493274	0.600875	0.281545	0.714904	0	0	0.352363	0
C9IYT0	0	0	0	0	0	0	1	0	0	0	0	0	0	0
C9IZ93;C9J9P8;C9JF62;Q969M7;Q969M7-2;Q969M7-3;Q969M7-7	0.797561	1	0.555439	0.679995	0.503688	0.485644	0.358655	0.22514	0.230654	0.179966	0.160171	0.0764178	0.0532081	0
C9IZF6;P41247	0	0	0	0	0	0	0	0	0	0.0534858	0.126548	1	0.525488	0.415104
C9IZL5;C9JC87;C9JMG3;C9JWL4;F8WCR6;H0Y6K1;O00189
C9IZN0;Q9NRM6;Q9NRM6-2	0	0	0	0	0	0	0.883676	0.476252	1	0	0.499673	0	0	0
C9IZU8;C9J9T0;Q96AT9	0.301894	1	0.612184	0.518177	0.400024	0.267604	0.0890868	0.0929523	0.0369309	0.0489743	0.0373287	0	0	0
C9J050;C9JEJ2;P49585	1	0.113943	0.0883794	0.321534	0.0836545	0.195264	0.0826488	0.221615	0.118924	0	0.170484	0.0863375	0.213203	0.394789
C9J066;E9PN67;Q8N4C6;Q8N4C6-10;Q8N4C6-11;Q8N4C6-2;Q8N4C6-4;Q8N4C6-5;Q8N4C6-6;Q8N4C6-7;Q8N4C6-9	0	0	0	0	0	0	0.0852894	0.0739858	1	0.583548	0.374113	0	0.65946	0.961996
C9J0A4;P57723;P57723-2
C9J0A7;Q9UQN3;Q9UQN3-2	0.997905	0.921801	0.693327	0.454369	1	0.39775	0.211471	0.251306	0.0904119	0.10497	0.073456	0	0.0179469	0.135782
C9J0I9;Q86WB0;Q86WB0-2;Q86WB0-3	0.333609	0.525971	0.137843	0.125047	0.094485	0.0411775	0.0125894	0	0.0493595	0.244008	0.35585	0.836197	0.925821	1
C9J0J0;Q96EE4	0	0	0	0	0	1	0.394819	0	0	0	0	0	0	0
C9J0J7;G5E9Q6;P35080-2	0.689697	1	0.526364	0.296481	0.302433	0.223043	0.0885442	0.0937341	0.0664499	0.0617636	0.0402426	0	0.00573108	0
C9J0K6;P30626;P30626-2;P30626-3	0.630992	1	0.699912	0.649619	0.583642	0.264659	0.136923	0.0881099	0.0637887	0.0431824	0.0577041	0.0174191	0.0353134	0
C9J159;F5H6W4;Q9H992
C9J165	0	0	0	1	0	0.628523	0	0	0	0	0	0	0	0
C9J1C6;Q9P0P0	0.712551	0.987891	1	0.803018	0.874757	0.386872	0.178301	0.179989	0.107278	0.105087	0.105955	0.135918	0	0
C9J2C0;Q9NY65;Q9NY65-2	0.282101	1	0.617919	0.596003	0.323855	0.172055	0.151712	0.149634	0.0826614	0.0718965	0.051454	0	0	0
C9J2P9;Q75N03;Q75N03-2	0	0	0	0	0	0	0.139692	0	0.280093	0	0	0.195162	1	0.584579
C9J2Y9;P30876	0.172365	0.243207	0.180075	0.160573	0.179461	0	0.123116	0.0564129	0.0463083	0.110437	0.0614213	0.139896	0.121385	1
C9J365;C9JA28;Q9UNL2;Q9UNL2-2	0	0	0	0	0	0	0.138186	0.215716	0.0870976	0.773924	0.700151	0.180253	1	0.143736
C9J384;Q9BQ75;Q9BQ75-2	0	0	0	0	0	0	0	0	0	0.21873	0	0	0	1
C9J3D7;Q9UKG9;Q9UKG9-3	0.716873	1	0.438048	0.277042	0.230243	0.00449152	0.0371877	0.128537	0.333906	0.577227	0.76342	0.986977	0.842308	0
C9J3R8;E7ETS9;O60513	0	0	0	0	0	1	0.47939	0	0	0	0	0	0	0
C9J406	0.0464348	0	0	0.00832014	0.0159494	0.0272377	0.0717779	0.132576	0.20304	0.307889	0.668342	1	0.817847	0.552213
C9J494;Q9H000;Q9H000-2	0.294777	0.492964	0.433098	0.676452	1	0.569181	0.744269	0.119774	0.0279853	0.11332	0.156126	0.83673	0.979947	0
C9J4X5;Q96EU6;Q96EU6-2;Q9H160;Q9H160-2	0	0	0	0	0	0	0	0	0	0	0	0	0	1
C9J4Z3;P61513	0.0531584	0	0.0649428	0.088975	0.104006	0.183017	0.381955	0.348533	0.528783	0.47527	0.643918	1	0.987864	0.426267
C9J555;J3QLM1;J3QLS1;Q14849	0	0	0	0	0	0	0	0	0	0	1	0	0	0
C9J597;C9JF31;Q9BV87	1	0	0.639968	0	0	0.193168	0.739209	0.422559	0.316298	0.226375	0	0	0	0
C9J5D1;E7EQ69;Q9GZZ1	0	0.170077	0.229492	1	0.859007	0.926365	0.813943	0.846656	0.501881	0.559455	0.286996	0.212491	0.203245	0.0373559
C9J5N1;Q9BTE6;Q9BTE6-2;Q9BTE6-3	0.67508	1	0.621876	0.53515	0.478119	0.453728	0.328353	0.188319	0.145338	0.158678	0.106755	0.00290983	0.0524691	0
C9J6G3;C9J7M1;O95749	0.795205	1	0.84767	0.505421	0.469451	0.384489	0.138548	0.177162	0.149262	0.0746632	0	0	0	0
C9J6K0;Q13103
C9J6K3;C9JM54;Q9HC52	0	0	0	0	0	0	0	0	0	0	0	0	0	1
C9J6P4;Q7Z2W4	0.0594124	0.00321705	0	0.0309338	0.065483	0.152292	0.282988	0.282362	0.363457	0.520756	0.565759	1	0.916648	0.600862
C9J6W0
C9J712;P35080	0.566095	1	0.818847	0.330361	0.33541	0.225903	0.124272	0.0594094	0.0868277	0.0667627	0	0	0	0
C9J758;Q969T7;Q969T7-2	0.891279	1	0.539882	0.520356	0.398221	0.307067	0.18858	0.129656	0.0925785	0.102542	0.0569233	0	0	0
C9J798;E5RK78;E7ERK1;F5GXT2;F8W6L0;O43374;O43374-2	0	0	0.086513	0.12743	0.133419	0	0	0	0	0	0.969351	0.960585	0.407291	1
C9J7E5;Q9Y5L0;Q9Y5L0-1	0.593347	1	0.654206	0.412006	0.325964	0.252646	0.206217	0.114103	0.0523019	0.0973867	0	0.067891	0.0445989	0.0489684
C9J7E8;Q9UL63;Q9UL63-2
C9J7K9;C9J9P4;H7C5I5;O15162;O15162-2	0	0	0	0	0.0404589	0.304006	0.49858	0.644977	0.850485	1	0.847466	0.917993	0.938306	0.849873
C9J813	0.534446	0.258438	0.161973	0.0834559	0.27727	0.0199064	0	0.0265993	0.133312	0.335366	0.340193	0.031972	1	0.324742
C9J826
C9J8B8;Q969S8;Q969S8-2	0.289753	1	0	0	0	0	0.154075	0.0950652	0	0	0	0	0	0
C9J8S2;Q99969	0.366881	0	0.126932	0.190746	0.303483	0.967689	1	0.697284	0.71971	0.987102	0.754537	0.740213	0.606726	0.706011
C9J8T4;C9JYN7;O43567	0	0	0	0	0.341967	1	0.757841	0.769426	0.601713	0.843113	0.815337	0.494012	0.669354	0.461929
C9J8W4;E9PBQ4;F5GXF0;F8W6I3;H7BZ00;P22736;P22736-2;P43354;P43354-2	0	0	0	0	0	0	0.256226	0	0	0	0	1	0	0
C9J975;E7ESL9;Q96P47;Q96P47-2;Q96P47-3;Q96P47-4;Q96P47-6	0	0.520168	0.600712	0.437271	0.666473	0	0	0.23781	0.57428	1	0	0	0	0
C9JA08;Q96D46	0.256601	0	0.891402	0.848974	0.665963	0.395452	1	0.764672	0.432913	0.726169	0.341211	0	0.663435	0.591045
C9JA90	0	0	0	0	0	1	0.883826	0	0	0.72217	0	0	0	0
C9JAX1;Q16595	0.287387	0.255704	0.125285	0.124777	0.147578	0.0300125	0	0.0205505	0.0623646	0.0908895	0.721293	1	0.985683	0.528166
C9JB28;C9JPS5;Q6ZMH5	0.0678411	0	0	0.0961008	0.151769	0.346111	1	0.59796	0.724196	0.708804	0.623346	0.656963	0.167848	0.775304
C9JB30;Q9UPY8	0.770228	1	0.49401	0.660278	0.739707	0.608163	0.331065	0.281187	0.237531	0.179098	0.0757791	0.0946623	0	0.0256751
C9JBG5;E9PMC3;F5H8L4;Q8NBJ9;Q8NBJ9-2	0.246826	0	0.277598	0.414584	0.762803	0.858075	0.901464	1	0.642018	0.580199	0.508462	0.425068	0	0.813925
C9JBI3;P78330	0.661749	1	0.535883	0.394893	0.348947	0.255187	0.103316	0.125821	0.0732772	0.0602816	0.025881	0.0103478	0.0144707	0
C9JBY7;Q9Y291	0	0	0	0	0	0	0	0	0	0.143351	0.339424	1	0.792	0.393551
C9JC47;P0CG42;P0CG43
C9JCC6;E9PQX9;Q14919;Q14919-2	0.525595	0	0.284039	0.285701	0.509744	1	0.117354	0.0514476	0.375009	0.228243	0.460128	0.255778	0.202275	0.532793
C9JCU6;F2Z2B3;F8WCP4;Q12851;Q12851-2	0	0	1	0.827793	0.61423	0	0	0	0	0	0	0	0	0
C9JEG3;Q9UBQ6	0	0	0	0	0.215267	1	0.5815	0.242033	0	0	0	0	0	0
C9JEH3;C9JG97;Q13685	0.704193	1	0.700126	0.485414	0.507392	0.331201	0.165155	0.178208	0.164362	0.183525	0.0485345	0	0.0841987	0
C9JEK0;C9JP86;Q08AI8	0	1	0	0	0	0.17276	0	0.171764	0	0	0	0	0	0
C9JER6;P61366	0	0	0	0	0	0	0	0	1	0	0	0	0	0
C9JF50;E9PLU1;E9PRK5;E9PRW1;E9PSD6;Q9H019;Q9H019-2;Q9H019-3	0	0	0	0	0	0	0	0	0	0.289232	0.949568	0.620556	1	0
C9JFE4;Q13098;Q13098-5;Q13098-7	0.622426	1	0.822596	0.477511	0.481468	0.270301	0.198327	0.154418	0.0919982	0.0915939	0.0140849	0.00684588	0	0.00412763
C9JFR7;P99999	0.132295	0.114203	0.0147321	0.0141879	0	0.0934821	0.0884671	0.0539053	0.144456	0.285807	0.732653	1	0.735285	0.402881
C9JFV4;Q8IZL8	0	0	0.203454	0.113801	0.167644	0.123388	0.166008	0.136948	0.181618	0.300763	0.409272	0.586313	0.436341	1
C9JFX4;E9PLG6;E9PSD9;Q6IA17;Q6IA17-2	0.132187	0	0	0.0979625	0.767753	1	0.482339	0.644272	0.528748	0.284982	0.506957	0	0	0
C9JG87;Q9NYK5;Q9NYK5-2	0	0	0	0	0	0	0	0.0852804	0.102959	0.170987	0.59419	1	0.892052	0.548993
C9JGT3;G5E9C5
C9JHD7;C9JJK9;Q86YP4;Q86YP4-2;Q86YP4-3	0	0	0	0	0	0	0	0	0	0	0	0	0	1
C9JI98	0	0	0	0	0	0.327553	0.562539	0.971863	0.516486	0.847131	0.33098	0	0.431228	1
C9JIF9;P13798	0.455883	1	0.890757	0.639293	0.446397	0.320317	0.217057	0.144883	0.0834638	0.0988995	0.0362713	0.0172039	0.0551315	0
C9JIT1	0.414603	0	1	0.723452	0.154987	0.339472	0	0	0.0993715	0	0	0.537288	0.0767536	0.157345
C9JIZ6;P07602;P07602-2;P07602-3	0.26862	0	0.183543	0.482382	0.476398	0.802126	1	0.831072	0.815329	0.655515	0.654827	0.603788	0.647525	0.493668
C9JJ19;P82930	0	0	0.0238639	0.0229512	0.0135917	0.0325695	0.0673322	0.0702344	0.128335	0.205977	0.372808	1	0.874346	0.537458
C9JJM2;Q96MV1;S4R434	0	0	0	0	0	0	0	1	0	0	0	0	0	0
C9JJN9;Q8N3P4;Q8N3P4-2;Q8N3P4-3	0	0	0.801676	0.804731	0.848326	1	0.564357	0	0	0	0	0	0	0
C9JJT5;G3V325;P56134-2;P56134-4	0	0	0	0	0	0	0.215545	0.464791	0.254757	0.334214	0.534191	0.699313	0.70632	1
C9JJX6;E9PDC3;O00192;O00192-2	0.167248	0	0	0.0135214	0.0143513	0.0649812	0.150708	0.22004	0.624598	0.742962	0.648512	0.566261	0.541795	1
C9JK83;O95630;O95630-2	0.393533	1	0.740422	0.488214	0	0.327858	0.289824	0.234435	0.226586	0	0	0	0	0
C9JKL2;C9JPX5;O95772;O95772-2	0	0	0	0	0	0.545114	0.741959	0.788531	1	0.685933	0.377593	0	0	0
C9JLB7;Q96HP4;U3KQU8	0.117505	0.250449	0.200431	0	0.0702602	0	0.0525311	0.0746401	0.182092	0.0336941	0.452795	0.982803	1	0.961114
C9JLU1;P52434;P52434-4	0.840205	1	0.57957	0.382633	0.350546	0.26997	0.192394	0.124803	0.10871	0.109892	0.0774294	0	0.0432129	0.514122
C9JLW8;I3L2L5;I3L4Q0	0	0.660246	0.911737	0.635191	1	0.792499	0.550489	0.547107	0.6208	0.511786	0.510221	0.38211	0.683963	0
C9JNE2;Q9Y530	0.0962261	0.863949	0.823845	0.498925	1	0.675056	0.717926	0.455855	0.479939	0.910042	0.185582	0.790083	0.672819	0
C9JNI1	0	0	0	0	0	0	1	0	0	0	0	0	0	0
C9JNW5;C9JXB8;P83731	0.0540762	0	0.0520897	0.0920062	0.17941	0.169132	0.297702	0.443301	0.574673	0.537136	0.820584	0.883566	1	0.747593
C9JNZ0;C9JRY4;Q96IW7	0	0	0	0	0	0	1	0.597674	0.169745	0.251962	0	0	0	0
C9JP16;O75718	0.117633	0	0.0349133	0.0964646	0.139541	0.285323	0.823331	1	0.824415	0.608332	0.649409	0.581935	0.552613	0.358898
C9JP85;Q16656;Q16656-2;Q16656-4	0	0	0	0	0.0422202	0	0	0.0293037	0.070584	0.0661323	0.0739076	0	0.0774685	1
C9JPG5;Q13275;Q13275-2	0.946044	1	0	0	0.00126294	0.00906755	0	0.127821	0	0	0	0	0	0
C9JPI6	0	0	0	1	0	0	0	0	0	0	0	0	0	0
C9JPQ6;Q9BYB4;Q9BYB4-2	0	0	0	0	0	1	0	0	0	0	0	0	0	0
C9JPU9;H3BS93;H3BSZ1;P05108-2	0	0	0	0	1	0.178426	0	0	0	0	0	0	0	0
C9JQ41;H7C525;Q4VC31	0.0731208	0.571146	0.184895	0.231986	0	0.241462	0.0351618	0.0491197	0.0866641	0.0884151	0.691988	0.819409	1	0.0890883
C9JQ60	0	1	0.515378	0.761353	0.463311	0.426443	0	0.139255	0	0	0	0	0	0
C9JQD4;O43447	0.375915	0.536497	0.417274	0.357851	0.304754	0.176178	0.0906962	0.176784	0.0639822	0.105588	0.110737	0.109293	0	1
C9JQH3;J3KQW6;Q86UV6;Q86UV7	0	0	0	0	0	0	0	0	0	0	1	0.352752	0.774216	0
C9JQI7;C9JQI7-2;D6RC30	0	0	0	0	0	0.542301	0.537628	1	0.981747	0.831863	0.839945	0	0	0
C9JQS9;E7ETT1;E7ETT4;E7EX59;E9PDR0;P05166;P05166-2	0.0381276	0	0.0714845	0.0450742	0.0383913	0.0266402	0.00440243	0.00537528	0.0326268	0.115481	0.379978	1	0.944092	0.702405
C9JQV0;H7C0T1;H7C2R9;Q9BRJ6	0	0	0	0.248848	0.333193	1	0.589911	0.425305	0.480659	0.305861	0.993874	0.868682	0.995155	0.902903
C9JQX2;Q86VD9
C9JQZ3;C9JS61;C9K022;Q9H8Y5	0	0	0	0	0	0.641488	1	0.615576	0.695745	0.50787	0	0	0	0
C9JR56	0	0	0	0	0	0	0	0	0.137818	0	0.675127	1	0.39979	0.209721
C9JRD2;P25686;P25686-2	1	0.973078	0.594276	0.500953	0.559794	0.299587	0.128624	0.110355	0.11001	0	0.0728233	0.0161725	0.0903816	0.129719
C9JRZ6;Q9NX63	0.0599478	0	0	0.0144792	0.019954	0.0459799	0.0930952	0.140683	0.25549	0.277822	0.84445	0.919746	1	0.531261
C9JS50;Q687X5	0	0	0	0	0	0.0474133	0.220937	0.664986	1	0.782866	0.601788	0.456216	0.391598	0
C9JSU1;Q9Y608;Q9Y608-2;Q9Y608-4;Q9Y608-5	0.380483	0	0.175951	0.0866995	0.11678	0.361172	0.505156	0.182948	0.380917	0.860029	0.872332	0.551605	0.707206	1
C9JUQ8	0	1	0	0.336501	0	0	0.034202	0.147608	0	0	0.00838802	0	0.0107004	0
C9JW74;C9JWU9;Q5EB52;Q5EB52-2;Q5EB52-3	0	0	0	0	0	0	0	0.887411	0.394591	1	0	0.532801	0	0.407743
C9JXB2;Q9NS98	0	0	0	0	0	0	0	1	0.965198	0	0	0	0	0
C9JXF9;P08833	0	0	0	0	0	1	0.755209	0.960445	0.870113	0.13167	0	0	0	0
C9JXM5;G5E9W1;Q7Z3E1	0	0	0	0	0	0.195028	0	0	0	0.171559	0.484471	0.193924	0	1
C9JY79;M0QZQ3;Q9H254;Q9H254-4	0	0	1	0.413975	0	0.39294	0.194914	0.190501	0.439868	0.728876	0.298202	0.0589968	0	0
C9JYJ6;Q4L180-3;Q4L180-5;Q4L180-7	0.290998	0.251522	0.130755	0.0869618	0.14427	0.0720772	0	0	0.13848	0	0.2041	0.650428	1	0.443276
C9JYM0;O75817	0	0	0.130118	0	0	0.25504	0.511144	0.450428	0.666691	1	0.799917	0.953199	0.998146	0.986633
C9JYS5;J3KS67;J3QL47;J3QL63;K7ENL4;Q96ET8-3;Q9NYZ1	0	0	0	0.139601	0.541734	0.678623	1	0.822576	0.48067	0.666068	0.400859	0.407914	0.451706	0.43263
C9JZ38	0	0	1	0	0	0	0	0	0	0	0	0	0	0
C9JZB3;Q16821	0	0	0	0	0	0	0	0	0	0.0195539	1	0	0	0
C9JZF7;G5E9W2;Q9P2E5;Q9P2E5-2	0	0	0	0	0	0.711632	1	0.845672	0.466381	0.238072	0	0.675036	0	0
C9JZG9;C9JZY6;P62256	0.522621	1	0.831408	0.809252	0.410697	0.322473	0.192726	0.18547	0.0820563	0.104245	0.0712035	0.0426521	0.0152878	0
C9JZI1;P35249;P35249-2	0.175801	0	0	0	0.113282	0.0812128	0.21859	0.189436	0.228149	0.226092	0.215237	0.214278	0.277306	1
C9JZI7	0.369711	1	0.577621	0.516242	0.571005	0.371973	0.144653	0.101119	0.079734	0.0153182	0.0261534	0	0.0323832	0.00137471
C9JZR2;O60716;O60716-10;O60716-11;O60716-13;O60716-2;O60716-3;O60716-5;O60716-9	0.287622	0.0216815	0	0.0205574	0.0298144	0.0668117	0.188139	0.262431	0.596107	0.881252	0.670013	0.588699	0.504545	1
C9K058;Q9H2H8	0.398999	1	0.675581	0.402896	0.331132	0.287013	0.166505	0.13298	0.0999154	0.0250121	0.0396488	0	0	0.0739924
C9K0C8;Q9NS00;Q9NS00-2	0	0	0	0	0	1	0	0	0	0	0	0	0	0
C9K0I9	0	0	0	0	0	0	0	0	0.838145	1	0	0	0	0
D1MQ08;M0R1J0;O15554	0.515587	1	0.427522	0.328479	0.134395	0.168265	0.0997179	0.0748117	0	0	0	0	0	0
D3DQV9;H0Y3P2;P78344;P78344-2	0	0.358282	0.729057	0.923558	1	0.661529	0.826995	0.695647	0.743883	0.746114	0.537186	0.47632	0.382394	0.121045
D3DRR9;Q86WR7;Q86WR7-2	0	0	0	0	0	0	0	0	1	0.488803	0	0	0	0
D3DUJ3;K7EIE9;K7EQG9;P17706;P17706-2;P17706-3;P17706-4	0	0	0	0	0.49667	0	1	0.987879	0.752325	0	0	0	0	0
D3DWX8;P98173;P98173-2;P98173-3;Q5HY75	0	0	0	0.398405	0.169897	1	0.375879	0.465851	0.309926	0.304317	0	0	0	0.287801
D3K2X1	0	0	0	0	0.498338	1	0.607046	0.448555	0.560025	0.143156	0	0	0	0
D3YTA9;F6U1T9;P63098	0.754907	1	0.893016	0.54275	0.265119	0.422247	0.246254	0.2251	0.230206	0.237182	0.0645967	0.0276173	0.158047	0
D3YTC7;Q9UBM1;Q9UBM1-2;Q9UBM1-3	0	0	0.0314993	0	0.115247	0.407348	1	0.693862	0.659354	0.664607	0.51872	0.53381	0.74364	0
D5H3J5;Q2L6G2	0	0	0	0	0.150494	0.261291	0.161001	0.714445	1	0.354741	0	0	0	0.505168
D6R927;D6R946;D6R9K5;D6R9X3;D6RA45;D6RAT2;D6RB37;D6RBQ8;D6RCM1;D6REC2;D6REP3;D6RF98;D6RIV8;D6RIZ8;Q06330;Q06330-4;Q06330-5;Q06330-6;Q06330-7	0	0	0	0	0	0	0	0	0	0	0	0	0	1
D6R938;Q13557;Q13557-10;Q13557-11;Q13557-12;Q13557-3;Q13557-4;Q13557-5;Q13557-6;Q13557-8;Q13557-9	0.404781	0.501479	1	0.683536	0.581099	0.322811	0.219684	0.156445	0.210857	0.1646	0.186929	0.0572808	0	0.100355
D6R9C7	0.105083	0	0	0	0	0	0.0818611	0.199642	0.662262	0	1	0	0	0
D6R9P3	0.0118876	0	0.0295653	0.119829	0.124469	0.0958667	0.127901	0.0830986	0.172133	0.0991502	0.241378	0.235527	0.351314	1
D6R9P8;Q6AWC2;Q6AWC2-4;Q6AWC2-6	0	0	1	0.773757	0.473834	0.572661	0.703413	0.624343	0.425053	0.665507	0.167603	0.710848	0	0
D6R9R5	0	0	0	0	0.673476	0.492671	0.539309	1	0.586722	0.49617	0	0.512593	0	0
D6R9S2;D6RIC1;H0Y8L2;H0YEZ3;H0YJP6;P59282	1	0	0	0	0	0.219674	0	0	0	0	0	0	0	0
D6R9S7;D6RDB0;D6RHE3;Q96GZ6;Q96GZ6-2;Q96GZ6-5;Q96GZ6-6;Q96GZ6-7;Q96GZ6-9	0	0	0	0	0	0.531823	0.627469	0.718695	1	0.596973	0.285276	0	0	0
D6R9Z7;P15954	0.0387623	0	0	0.0167454	0.034716	0.0605361	0.0602253	0.131047	0.210332	0.199087	0.586599	0.756425	1	0.635555
D6RA25	0	0	1	0	0	0	0	0	0	0	0	0	0	0
D6RA47;D6RE79;D6RIZ4;Q14728	0	0	0	0	0	0.262017	1	0.914784	0.625351	0	0	0	0.347692	0.388224
D6RA57;D6RC31;D6RE67;H0Y9X1;Q96EY4	0	0	0	0	0	0	0	0	0.0882781	0.175149	0	0	0.290306	1
D6RA82;P12429	0.540894	1	0.487286	0.46694	0.491628	0.207098	0.139143	0.0961042	0.09158	0.0465194	0.049314	0	0	0.0191311
D6RA96;Q9NZ71;Q9NZ71-2;Q9NZ71-4;Q9NZ71-6;Q9NZ71-7;Q9NZ71-8;X6R5I7	0	0	0	0	0.926953	0	0	0	0	0	1	0	0	0
D6RAD4;P50613	0.397496	0.306829	0.26575	0.473751	0	0.275445	0.374345	0.282367	0.360876	0.295878	0.291643	0.640927	0.708247	1
D6RAD5	0	0	0	0	0	0	0	0	0	1	0	0	0	0
D6RAJ6;Q9UKT5;Q9UKT5-2	0.528632	0	0	0.536058	1	0	0	0	0	0	0	0	0	0
D6RAN1;D6RF83;D6RH06;H7BYK4;Q9NR12;Q9NR12-2;Q9NR12-3;Q9NR12-4;Q9NR12-5;Q9NR12-6	0.355298	0	0	0	0	0.208616	0.252096	0.288142	0.424403	0.440737	0.636674	0.56052	0.576992	1
D6RAN8;H7C5U8;Q9P0M9	0	0	0	0	0	0	0	0	0.0950492	0.0406949	0.665494	1	0.382718	0.65265
D6RAR4;Q04756	0	0	0	0	0	0	0.369504	0.693615	0.796117	1	0.270399	0.362474	0	0
D6RAZ0;E9PD12;F2Z2L2;H0YAM8;Q96AX9;Q96AX9-11;Q96AX9-13;Q96AX9-14;Q96AX9-2;Q96AX9-3;Q96AX9-5;Q96AX9-6;Q96AX9-7;Q96AX9-8	0	0	0	0	0.822889	0	0	0	1	0	0	0	0	0
D6RAZ3;E7EMP6;Q96FZ2	0	0	0	0.748486	1	0.276634	0.294658	0	0.186518	0	0	0	0.808739	0
D6RB81;Q9UHK6;Q9UHK6-5	0.39494	0.451394	0.257016	0.170478	0.00955505	0.00546193	0	0.000939318	0.10296	0.264034	0.58371	1	0.85983	0.305359
D6RB89;P50120	0.917987	1	0.478774	0.240378	0.265961	0.2294	0.0718243	0.111711	0.0654837	0.0684156	0	0	0	0
D6RBN6	0	0	0	0	1	0	0	0	0	0	0	0	0	0
D6RBR7;Q9Y3S2	0.500282	0.83702	0.602904	0.853205	0.289073	1	0.936421	0.582533	0.432379	0.512053	0.238942	0.187366	0.0701485	0
D6RBW1;P06730;P06730-2;P06730-3	0.466773	1	0.740729	0.632683	0.681313	0.653027	0.442048	0.314712	0.265964	0.246383	0.0999669	0.107395	0.0394975	0
D6RC47;D6REW1;Q9Y255;Q9Y255-2	0	0	0	0	0	0	0	0	0	0	0	0	1	0
D6RCC4;D6RCC9;Q8NEC7	0.414449	1	0	0	0	0	0	0	0	0	0	0	0	0
D6RCM8;O95379;O95379-2;O95379-3;O95379-4	0.70132	1	0	0.188514	0.533139	0	0	0	0	0	0	0	0	0
D6RCP5;Q8N264;Q8N264-2;Q8N264-3	0.0419949	0.0397634	0.0483644	0.0476274	0.0197232	0.00287317	0	0.0419867	0.0485129	0.101043	0.459067	0.965537	1	0.767896
D6RDG3	0	0	0	0	0	0.0884281	0	0.491004	0.799733	0.556057	0.707766	1	0.168464	0.676527
D6RDG8;D6RGZ4;O43791
D6RDK6	0	0	0	0	0	0	0	0	0	0	0	0	1	0.677502
D6RE84	0.843508	1	0.417688	0.199046	0.626251	0.399343	0.661826	0.639192	0.573043	0.401507	0.17218	0.202674	0	0.0832002
D6REA0;O75879	0.12196	0.141206	0.0881176	0.0563376	0.0354422	0.00288507	0.0482633	0	0.0449635	0.128249	0.387577	1	0.757598	0.491938
D6REK2;H0Y9T3;Q8WV44;Q8WV44-2;Q8WV44-4	0	0	0	0	0.235057	0	0.436244	0.460821	0.533925	0.229468	0.193841	0	0	1
D6RER5;D6RGI3;Q9NVA2	0.094631	0.144367	0.000966884	0	0.0705801	0.116685	0.133229	0.174076	0.386363	0.437369	0.546749	0.877858	1	0.494465
D6REX3	0.520511	0.854475	0.733112	0.98078	1	0.785545	0.565537	0.424421	0.299194	0.250781	0.108028	0.129033	0.125464	0
D6REY2;P23508;P23508-2	0.44995	0.0665525	1	0.84966	0.83812	0.232434	0.0695413	0.305526	0.27077	0.417193	0	0	0.712402	0
D6RF35;P02774;P02774-3	0.138251	0.0754911	0.0108774	0	0.0893571	0.426979	0.993302	1	0.882532	0.6788	0.490215	0.517817	0.407521	0.35952
D6RF43	0	0	0	0	0	0	1	0	0	0	0	0	0	0
D6RF44
D6RF47;D6RF94;Q9H1J5;Q9H1J5-2	0	0	0	0	0	0	0	0	0	0	1	0	0	0
D6RF48;Q9P2W9	0.143523	0	0	0.395035	0.196873	0.408658	0.81277	1	0.707665	0.794364	0.606721	0.757267	0.728767	0.460678
D6RFG8;P27707	0	0	0	0	0	0	0	0	0	0	1	0	0	0
D6RFI1	0	0	0	1	0.443155	0	0.386817	0	0	0	0.332085	0	0	0
D6RFI3;E7EQR8;Q9GZM5	0.371504	0	0.33721	0.332948	0.52573	1	0.696921	0.585585	0.320626	0.387589	0.36455	0.230521	0.253807	0.423231
D6RGG3;Q99715;Q99715-4	0	0	0	0	0	0	0	0	0	0	0	0	0	1
D6RGK3;D6RHW1;D6RIE8;D6RIV9;D6RIY1;Q16594;Q9HBM6	0.156312	0	0.140327	0.105079	0.109188	0.10761	0	0.0730652	0.157392	0	0	0.165602	0.167418	1
D6RGK9;H0Y9C1;H0Y9Z5;Q96LI5	0	0	0	0	0	0	0	0.660611	1	0.889625	0	0	0	0
D6RGZ3;Q8N1W1;Q8N1W1-3;Q8N1W1-4;Q8N1W1-5;Q8N1W1-6	0.59266	0	0	1	0	0.393118	0	0	0	0	0	0	0	0
D6RH21	0	0	0	0	0	1	0	0	0	0	0	0	0	0
D6RHG0;P78383	0.434804	0	0	0.157407	0.381209	0.441929	0.885941	1	0.48114	0.546379	0.336686	0.388354	0.405833	0.227421
D6RHH9;Q8TCT1;Q8TCT1-2;Q8TCT1-3	0.946384	0	0	0	0	0	0	1	0	0	0	0	0	0
D6RHX8;F8W9W2;P43250;P43250-2;P43250-3	0	0	0	0	0.101414	0.140317	0.455437	0.442077	0.787134	0.609546	0.343151	0.933299	0.837585	1
D6RIA8	0	0	0.467463	0	1	0.265295	0	0	0.293534	0	0	0	0	0
D6RID8;Q13888;Q6P1K8	0.123006	0	0	0	0.0870756	0.075858	0.162573	0.191504	0.216448	0.336151	0.245213	0	0.26316	1
D6RIE3	0.101341	0	0.00478329	0.00901583	0.0271896	0.0774163	0.184034	0.278959	0.397902	0.299317	0.75107	1	0.88642	0.603002
D6RIG4;Q9HCL0;Q9HCL0-2	0.44845	1	0.818966	0.743666	0.690221	0.483198	0.0248647	0	0.345363	0.466106	0.290219	0.573181	0.493075	0.030188
D6RIT3;Q8N1A6	0.962673	1	0.614801	0.50491	0.292239	0.221182	0.239075	0.130446	0.0904605	0.115327	0.0401472	0	0	0
D6RIY6;Q06265;Q06265-2	0.0299149	0	0.0915236	0.137301	0.0900576	0.17202	0.155232	0.157734	0.197178	0.301024	0.257675	0.385634	0.202539	1
D6RJ90;Q9Y6G5	0	0.157766	0.0742749	0.28758	0.394369	0.696764	1	0.477791	0.320911	0.248529	0.234205	0.0402524	0.105213	0.218698
D6RJC3;E7EQN9;E9PCZ3;E9PG59;E9PHC0;O15327	0	0	0	0	0	0	0.494754	0.800477	0	1	0	0	0	0
D6RJG9;Q9Y5W7;Q9Y5W7-2;Q9Y5W7-3;Q9Y5W7-4	0	0.625704	0	0	0	0	0.615143	1	0.468132	0.464864	0.65457	0.3171	0	0
D6W5U7;Q8TBR4;Q9UJ98;Q9UJ98-2;Q9UJ98-3	0	0	1	0	0	0	0	0	0	0	0	0	0	0
E0CX11
E1CKY7;O60237;O60237-4;O60237-6	0	0	0	0	0	0	0	0	0	0.237036	0.609386	1	0	0.208335
E2QRG8	0	0	0	1	0	0.878495	0.781989	0	0.387661	0	0	0	0	0
E2QRK7;Q5JTD0;Q5JTD0-2	0	0	0.665567	0.849528	1	0.808643	0.763425	0.733349	0.884058	0.560506	0	0	0	0
E3W980;E3W982;Q8TDG4	0	0	1	0.711397	0	0	0.249491	0.175568	0	0.188817	0	0	0	0.0449064
E5KLJ9;O60313-10;O60313-2;O60313-9	0.0762005	0	0.0168972	0.0386113	0.0701548	0.0734284	0.156992	0.169134	0.215571	0.412727	0.760773	1	0.819879	0.404329
E5RFE0;E5RGT8;Q9UQ10	0.595848	1	0.535882	0.25927	0.222412	0.213096	0.140567	0.0973483	0.116751	0.083027	0.076948	0	0.0623194	0
E5RFF8;J3KNU2;Q8IX29;Q8IX29-2	0.270023	0.00678232	0.165169	0.0822926	0.130098	0.0558899	0	0.0196615	0.0186921	0.0662169	0.43132	0.878139	1	0.479874
E5RFP0	0	0	0	0	0	0.777469	1	0	0	0	0	0	0	0
E5RFT4;Q8N4L2	0	0	0.28992	0	0	0.717715	0.585975	1	0.793156	0.307087	0	0	0	0.256366
E5RFV7;O00300	0	0	0	0	0	0	0	0	0	0	0.575909	0	1	0
E5RFX7	0	0	0	0	0	0	0	0.259586	0.244439	0.69335	0	0	1	0
E5RG15;E5RHB3;Q8NBP0;Q8NBP0-2	0	0	0	0	0	0.131455	0.152866	0.246504	0.278361	0.566353	0.742959	0.669324	0.358244	1
E5RG17;G5EA19;H0YBX2;Q6P1N9;U3KQS5	0.441382	1	0.715583	0.464669	0.410537	0.28795	0.162486	0.138165	0.0726353	0	0.160685	0.161972	0.160542	0.0103807
E5RG29	0	0	0	0	0	0.253491	0.349244	0.436171	0.617263	0.65962	0.494825	1	0.949874	0.280568
E5RG44;E5RGJ1;E5RIT1;Q629K1	0.244457	0	0.0299896	0.116351	0.107413	0.812153	0.631773	0.85511	0.442683	0.849244	0.899065	0.458932	0.729235	1
[truncated: 6,639 more rows]

## Sheet: E04_B_left
class	fed_median_Fr.1	fed_median_Fr.2	fed_median_Fr.3	fed_median_Fr.4	fed_median_Fr.5	fed_median_Fr.6	fed_median_Fr.7	fed_median_Fr.8	fed_median_Fr.9	fed_median_Fr.10	fed_median_Fr.11	fed_median_Fr.12	fed_median_Fr.13	fed_median_Fr.14
[truncated: 11 more rows]

[truncated: 4 more sheets: E04_B_right, E04_C, E04_D, E04_E]
