# Supplementary material for: C-COMPASS: a user-friendly neural network tool profiles cell compartments at protein and lipid levels
Source: Nat Methods. 2025 Dec 4;23(1):118–30. doi: 10.1038/s41592-025-02880-3 (PMC12791020; doi:10.1038/s41592-025-02880-3)
Supplement: Supplementary file 26 — Humanized liver spatial proteomic localization. [file 41592_2025_2880_MOESM26_ESM.xlsx]

## Sheet: E05_A_left
HFHF-fed
Identifier	CC_PROTEIN-COMPLEX	CC_NUCLEUS	CC_LD	CC_PEROXISOME	CC_ER	CC_ENDOSOME	CC_CYTOSOL	CC_MITOCHONDRIA	CC_GOLGI	CC_LYSOSOME	CC_PM
A0A024QZ33;K7EK40;K7EMD8;K7ERM9;Q9H0G5	1	0	0	0	0	0	0	0	0	0	0
A0A024QZW4;Q9H1N7	0	0	0	0	0	0	0	0	1	0	0
A0A024QZX5;A0A087X1N8;A0A2R8YD12;P35237	0	0	0	0	0	0	1	0	0	0	0
A0A024R3B9;E9PJL7;E9PNH7;E9PRA8;P02511	0	0	0	0	0	0.276122	0.723878	0	0	0	0
A0A024R3M2;A0A1B0GUD6;A0A1B0GWG7;A0A2R8Y5X2;J3KNL5;Q3KR37;Q3KR37-2;Q3KR37-3;Q3KR37-4	0	0	0	0	0	0	0	0	1	0	0
A0A024R4E5;Q00341	0	0	0	0	0	0	0	1	0	0	0
A0A024R571;Q9H4M9
A0A024R5I4;O94956	0	0	0	0	0.630009	0	0	0	0	0	0.369991
A0A024R6I7;P01009
A0A024R7E8;K7EMV4;K7EN05;K7EPC8;K7EQ44;P60002	0	0	0	0	0.616418	0	0	0	0.383582	0	0
A0A024R7W5;A0A087WY31;A0A087X0Q1;Q7Z739	0	0	0	0	1	0	0	0	0	0	0
A0A024RA52;P25787	1	0	0	0	0	0	0	0	0	0	0
A0A024RAC6;Q14241	0	0	0	0	0	0	0	0	1	0	0
A0A024RBG1;Q9NZJ9-2	0	0	0	0	0	0	1	0	0	0	0
A0A024RCG2;Q96BI1	0	0	0	0	1	0	0	0	0	0	0
A0A024RCN4;A0A087X2F1;B4DMT1;Q16670;Q16670-2	0	0.300155	0	0	0	0	0	0	0	0.312835	0.38701
A0A024RCQ8;A0A0G2JH76;A0A0G2JHB6;A0A0G2JIU6;A0A0G2JK02;A0A0G2JKR3;A0A0G2JLA3;A0A0G2JLL3;A0A140T8X7;A0A140T9Y1;G8JLL2;Q9UMR5;Q9UMR5-2;Q9UMR5-3	0	0	0	0	1	0	0	0	0	0	0
A0A024RCR6;A0A0G2JK23;P46379;P46379-2;P46379-3	0	0	0	0	0	0	1	0	0	0	0
A0A044PY82	0	0.432546	0	0	0	0	0	0	0	0	0.567454
A0A067XG54;Q8NB49;Q8NB49-2;Q8NB49-3;Q8NB49-4
A0A075B6F0;H7BXG6;M0R167;Q9H0D2;Q9H0D2-2	0	0	0	0	0	0.250432	0	0	0.320211	0.429357	0
A0A075B6F9;Q9Y314	0	0	0	0	0	0	1	0	0	0	0
A0A075B6G3;A0A087WTU7;A0A087WV90;A0A5H1ZRP8;P11532;P11532-11;P11532-4	0	0	0	1	0	0	0	0	0	0	0
A0A075B6U9
A0A075B6W5	0	0	0.622563	0	0	0	0	0	0.377437	0	0
A0A075B727;A0A075B728;P16284;P16284-2;P16284-3;P16284-4;P16284-5;P16284-6	0.630057	0	0	0	0	0	0	0	0.369943	0	0
A0A075B730;P58107	0	0.455464	0	0	0	0	0	0.262507	0	0	0.282029
A0A075B749;A0A087WX83;Q5VU43;Q5VU43-3;Q5VU43-4	0	1	0	0	0	0	0	0	0	0	0
A0A075B754;Q96QE3;Q96QE3-2	0	1	0	0	0	0	0	0	0	0	0
A0A075B773;K7ELY8;O00623	0	0	0.563349	0	0	0	0	0	0	0	0.436651
A0A075B784;E9PEW0;K7ELR5;Q8IXW9;Q9P275	0	1	0	0	0	0	0	0	0	0	0
A0A075B7B1;C9JIE4;O15061;O15061-2;O15061-3	0	0	1	0	0	0	0	0	0	0	0
A0A075B7B5;B7ZM87;O75044
A0A075B7F1;S4R3C0	0	0	0.317854	0.341454	0	0	0	0.340691	0	0	0
A0A087WSV6;A0A087WSX8;A0A0B4J1W1;A0A0G2JLS4;A0A0G2JM99;A0A0G2JMY9;A0A0G2JNK9;A0A0G2JNM2;A0A0G2JNQ6;A0A0G2JNR3;A0A0G2JP64;A0A0G2JP80;A0A0G2JP96;A0A0G2JQ15;A0A0G2JQ44;A0A0G2JQ46;A8MVE2;D9IDM5;D9IDM6;F6RVM3;F6TER3;O75019;O75019-2;Q8N6C8;Q8N6C8-3;Q8NHL6;Q8NHL6-2;Q8NHL6-3;Q8NHL6-4;Q8NHL6-5	0	0	0	0	0	0	0	0	1	0	0
A0A087WSW7;A0A0B4J1V9;F6XU50;Q9NRZ9;Q9NRZ9-2;Q9NRZ9-3;Q9NRZ9-4;Q9NRZ9-5;Q9NRZ9-6	1	0	0	0	0	0	0	0	0	0	0
A0A087WSW9;A0A087WSY9;Q16881;Q16881-3;Q16881-4	0	0	0	0	0	0	1	0	0	0	0
A0A087WSY5;Q96IY4	0	0	0	0	0	0	0	0	0	1	0
A0A087WSZ7;A0A1B0GW84;D6RHE0;Q08493;Q08493-2;Q08493-3;Q08499;Q08499-10;Q08499-11;Q08499-2;Q08499-3;Q08499-4;Q08499-5;Q08499-6;Q08499-8;Q08499-9;Q32MM7	0	0	0.295308	0	0	0.2915	0	0	0.413192	0	0
A0A087WT18;Q96A73;Q96A73-2	0	0	0.214904	0.42079	0	0	0	0.364306	0	0	0
A0A087WT20;Q9NV06	0	1	0	0	0	0	0	0	0	0	0
A0A087WT23;A0A087WV67;O00124;O00124-3	0	0	0	0	0.407987	0	0	0	0.248503	0	0.343511
A0A087WT30;J3KN91;Q8N5I9	0	0	0	0	0	0	1	0	0	0	0
A0A087WT34	0	0	0.234819	0	0	0.352926	0	0	0.412255	0	0
A0A087WT44	0	0	0	0	1	0	0	0	0	0	0
A0A087WT58;A6NES4	0.397253	0	0	0	0	0	0.602747	0	0	0	0
A0A087WT59;P02766
A0A087WT84;Q9H9V9;Q9H9V9-2
A0A087WT87;P43003;P43003-2	0	0	0	0	0	0.449551	0	0	0.249624	0	0.300825
A0A087WT95;P49753	0	0	0	0	0	0	0	1	0	0	0
A0A087WTA5;E7ERK9;Q9UI10;Q9UI10-2;Q9UI10-3	1	0	0	0	0	0	0	0	0	0	0
A0A087WTA8;P08123	0	0.681038	0	0	0	0	0	0.318962	0	0	0
A0A087WTE4;A0A087WTF6;A0A087WV75;A0A087WVU1;A0A087WWD4;A0A087WWJ5;A0A087WX77;A0A087WZS4;A0A087X1V2;A0A0D9SF98;H7BYX6;P13591;P13591-1;P13591-3;P13591-4	0	0	0.182545	0	0	0	0	0.281818	0.242148	0	0.293488
A0A087WTF0;A2A3K4;A2A3K4-2	0	0	0	0	0	0.489342	0	0	0.510658	0	0
A0A087WTG8	0	0	0	0	0	0	0	1	0	0	0
A0A087WTJ6;O14627;P47902;P47902-2;Q99626	0	0	0	0	0	0	0	0	1	0	0
A0A087WTK0;A0A087WVC6;Q12913	0	0	0	0	0.473443	0	0	0	0	0	0.526557
A0A087WTM1;Q9Y6N7;Q9Y6N7-2;Q9Y6N7-3;Q9Y6N7-4;Q9Y6N7-5;Q9Y6N7-6	0	0	0	0	0.534334	0	0	0	0	0	0.465666
A0A087WTP3;Q92945
A0A087WTQ2;A0A3B3IT47;C9JGR9;E7EQ49;Q9Y2I8;Q9Y2I8-2;Q9Y2I8-3	1	0	0	0	0	0	0	0	0	0	0
A0A087WTS0;H0YJK8;P18283	0	0	0	0	0	0	1	0	0	0	0
A0A087WTT2;Q5JWB9;Q96A57;Q96A57-2	0	0	0	0	0	0	0	0	1	0	0
A0A087WTU3;Q9Y6I9	0	0	0	0	1	0	0	0	0	0	0
A0A087WTV6;A0A087WZR9;Q96C36	0	0	0	0	0	0.459496	0	0	0	0	0.540504
A0A087WTY4;P49454	0	0.26936	0	0	0	0	0	0	0.416849	0	0.313791
A0A087WTY7;Q9H227	0	0	0	0	0	0	1	0	0	0	0
A0A087WTZ8;E5RFJ1;E5RHW9;E5RIM1;Q96MF7	0	0	0	0	0	0	0	1	0	0	0
A0A087WU02;Q96RQ1	0	0	0	0	0	0.364235	0	0	0.635765	0	0
A0A087WU05;A0A087WY48;Q8IY22;Q8IY22-2;Q8IY22-3	0	0	0.330624	0	0	0.356261	0	0	0.313115	0	0
A0A087WU07;Q5TGZ0;Q5TGZ0-2	0	0	0	0	0	0	0	1	0	0	0
A0A087WU25	0	0.188572	0	0	0	0	0	0.811428	0	0	0
A0A087WU31;A0A0A0MTB7;E9PE15;P51790;P51790-2;P51790-4;P51790-5	0	0	0	0	0	0.244947	0	0	0.755053	0	0
A0A087WU37;A0A087WWG3;A0A087X140;A0A0A0MRU4;A0A0A6YYH9;C9J3G2;H0Y857;Q5JTY5;Q5JTY5-2;Q5RIA9;Q5RIA9-3;Q5RIB0;Q5RIB3;Q8IUF1;Q9BRT8;Q9BRT8-2;Q9BRT8-3
A0A087WU46;A0A0A0MSL2;A0A0C4DGN9;B4DWF2;Q13422;Q13422-2;Q9UKS7;Q9UKS7-2;Q9UKS7-4;Q9UKS7-6;Q9UKT9;Q9UKT9-10;Q9UKT9-14;Q9UKT9-15;Q9UKT9-2;Q9UKT9-4;Q9UKT9-7;Q9UKT9-9	0	1	0	0	0	0	0	0	0	0	0
A0A087WU51	0.584503	0	0	0	0	0.415497	0	0	0	0	0
A0A087WU53;Q9H0U3	0	0	0	0	1	0	0	0	0	0	0
A0A087WUB9;Q8WYA6;Q8WYA6-4	0	1	0	0	0	0	0	0	0	0	0
A0A087WUC6;E9PI68;Q15005	0	0	0	0	1	0	0	0	0	0	0
A0A087WUD3;Q9NRP0;Q9NRP0-2	0	0	0	0.45894	0.323043	0	0	0.218018	0	0	0
A0A087WUE2	0.462785	0	0	0	0	0.216116	0	0	0.321099	0	0
A0A087WUE4;A0A0G2JNN3;C9JMY0;Q96PV6;Q96PV6-1	0	1	0	0	0	0	0	0	0	0	0
A0A087WUE6;A4PB68;Q3T8J9;Q3T8J9-2;Q3T8J9-3;Q9H869;Q9H869-2;Q9H869-3;Q9H869-4;Q9H869-5;Q9H869-6;Q9H869-7;Q9H869-8;Q9H869-9	0	0	0.198414	0.464737	0	0	0	0	0	0	0.336849
A0A087WUI6;Q8WXW3	0	0	0	0	0.466566	0	0	0	0.285115	0	0.248319
A0A087WUJ1;Q9H400;Q9H400-2	0	0	0	0	0	0	0	0	0	0	1
A0A087WUJ4;Q92618	0	0	0	0	0	0.487636	0	0	0.512364	0	0
A0A087WUK2;O14979;O14979-2;O14979-3	0	1	0	0	0	0	0	0	0	0	0
A0A087WUL2	1	0	0	0	0	0	0	0	0	0	0
A0A087WUL4;A0A087WX23;A0A087WZG9;B4DSP0	0	0	0	0	0	0.566595	0	0	0.433405	0	0
A0A087WUM5;Q5VZR0;Q9H4G4	0	0	0	0	0	0	0	0	0	0	1
A0A087WUQ6;P07203	0	0	0	0	0	0	0	1	0	0	0
A0A087WUT0;A0A0A0MR39	0	1	0	0	0	0	0	0	0	0	0
A0A087WUT6;O60841
A0A087WUU8;M0R3J2	0	0	0	0.571486	0	0	0	0.428514	0	0	0
A0A087WUV7;A0A3B3IS76;A0A3B3ISL9;A0A3B3ISM6;A0A3B3ISX6;A0A3B3ITJ2;A0A3B3IUC8;P10746;Q5T3L9	1	0	0	0	0	0	0	0	0	0	0
A0A087WUV9	0	0	0	0	0	0	0	0	1	0	0
A0A087WUW6;A0A087X0G7;A0A087X1B1;Q9Y6K9;Q9Y6K9-2;Q9Y6K9-3	0	0	0	0	0	0	0.749053	0	0	0.250947	0
A0A087WUW9;Q9NXU5	0	0	0	0	0	0	1	0	0	0	0
A0A087WUZ7;Q9Y5W8;Q9Y5W8-2	0	0	0	0	0.6827	0	0	0	0.3173	0	0
A0A087WV01	0	0	0	0	0	0	0	1	0	0	0
A0A087WV05;Q99417	0	0	0	0	0	0	1	0	0	0	0
A0A087WV24;P20711;P20711-3	0	0	0	0	0	0	1	0	0	0	0
A0A087WV25;O95684;O95684-2	0	0	0	0	0	0	1	0	0	0	0
A0A087WV39;Q92698;V9GYD3	0	0	0	0	0	0	0	1	0	0	0
A0A087WV96	0	0	0	0	0	0	0	0	0.290708	0.39152	0.317772
A0A087WV97;Q8WU79;Q8WU79-2;Q8WU79-3	0	0	0	0	0	0	1	0	0	0	0
A0A087WVA1;P62341	0	0	0	0	1	0	0	0	0	0	0
A0A087WVA8;Q8IWB9;Q8IWB9-2
A0A087WVC1;Q9BQ39	0	1	0	0	0	0	0	0	0	0	0
A0A087WVE2;O00602	0	0	0	0	0	0	0	0	1	0	0
A0A087WVF1;K7EQH1;Q96B23;Q96B23-2	0	0.436456	0	0	0	0	0	0.563544	0	0	0
A0A087WVF7;Q9NZM3;Q9NZM3-2
A0A087WVI0;E9PBL8;Q8WTW3	0.650521	0	0	0	0	0.349479	0	0	0	0	0
A0A087WVM1;P78382;P78382-2;Q5W1L7	0	0	0	0	0	0	0	0	1	0	0
A0A087WVM4;B7ZM99	0	0	0.228848	0	0	0	0	0.771152	0	0	0
A0A087WVP7;P0C024;P0C024-2	0	0	0	1	0	0	0	0	0	0	0
A0A087WVQ6;Q00610;Q00610-2	0	0	0	0	0	1	0	0	0	0	0
A0A087WVS8;Q70IA6;Q70IA6-3	0	0	0	0	0	0	1	0	0	0	0
A0A087WVT6;A0A087X159;D6RAC5;P81877;P81877-2;P81877-3;P81877-4;P81877-5;Q9BWW4;Q9BWW4-2;Q9BWW4-3	0	0	0	0	0	0	0	0	1	0	0
A0A087WVT8;A0A087X1L3;Q6ZWJ8	0	0.299473	0.284531	0	0	0	0	0	0	0	0.415996
A0A087WVX4;P49895;P49895-2;P49895-4	0	0	0.41428	0	0.58572	0	0	0	0	0	0
A0A087WVX5;A0A1B0GTA9;A0A1B0GTF6;A0A1B0GTN8;A0A1B0GTP5;A0A1B0GTS4;A0A1B0GTX2;A0A1B0GU53;A0A1B0GUI8;A0A1B0GUK4;A0A1B0GVB2;A0A1B0GWF9;A0A1C7CYX2;A0A2R8Y555;A0A2U3TZM7;A0A494C0B2;A0A494C0Z9;A0A494C184;E7EN11;F8VNV8;F8VU10;F8VUW8;H0Y476;O00305;O00305-2;O00305-3;O00305-4;P54284;P54284-2;P54284-3;P54284-4;P54284-5;Q02641;Q02641-2;Q02641-3;Q08289;Q08289-10;Q08289-2;Q08289-3;Q08289-4;Q08289-5;Q08289-6;Q0…	0	0	0	0	1	0	0	0	0	0	0
A0A087WVZ7;A0A087X068;Q9UJW7;Q9UJW7-2	0	0	0	0	0.557369	0	0	0	0	0	0.442631
A0A087WVZ9;A0A0A0MQR7;P19388	0	1	0	0	0	0	0	0	0	0	0
A0A087WW00;C9J9H9;P51668;Q9Y2X8	0	0	0	0	0	0	0	0	1	0	0
A0A087WW06;B0QYP5;Q96AY4	0	0	0.408792	0	0	0.300333	0	0	0.290875	0	0
A0A087WW23;P20292	0	0.596337	0	0	0	0	0	0	0	0	0.403663
A0A087WW28	0.722206	0	0	0	0	0.277794	0	0	0	0	0
A0A087WW48;E7ET14;H0Y3N9;H0Y589;O75151;Q9UPP1;Q9UPP1-2;Q9UPP1-3;Q9UPP1-4;Q9UPP1-5	0	0	0	0	0	0	0	0	1	0	0
A0A087WW58;Q9C0D9	0	0	0	0	0.603311	0	0	0	0	0	0.396689
A0A087WW59;Q7Z7L8	0	0	0	0	0	0	1	0	0	0	0
A0A087WW66;Q99460;Q99460-2	0.780436	0	0	0	0	0.219564	0	0	0	0	0
A0A087WW76;A0A1B0GTZ9;A0A1B0GV73;A0A452Q6Z5;H0Y468;Q5T5U3	0	0	0	0	0	0	0	0	0	0	1
A0A087WW77;Q15334	0.68929	0	0	0	0	0.31071	0	0	0	0	0
A0A087WW83;A0A087X0K8;Q6PRD1	0	0	0.240714	0	0	0	0	0	0.759286	0	0
A0A087WWA3;O60333;O60333-2;O60333-4;Q4R9M9	0.384224	0	0	0	0	0	0.615776	0	0	0	0
A0A087WWA7;O14640;O14640-2;P54792;P54792-2	0	0	0	0	0	0.404566	0	0	0.595434	0	0
A0A087WWF6;F8W8R3;P49005	0	1	0	0	0	0	0	0	0	0	0
A0A087WWG5	0	0	0	0	1	0	0	0	0	0	0
A0A087WWH3;Q9NZM4;Q9NZM4-2	0	1	0	0	0	0	0	0	0	0	0
A0A087WWI0	0	0	0	0	0	0	1	0	0	0	0
A0A087WWM0;O43617	0	0	0	0	0	0	1	0	0	0	0
A0A087WWM4;H0YNJ6;Q9P2T1;Q9P2T1-2	0.30383	0	0	0	0	0	0.69617	0	0	0	0
A0A087WWM6;E7EQL6;O43272;O43272-1;O43272-2	0	0	0.176133	0	0	0	0	0.823867	0	0	0
A0A087WWP4;A0A494C001;A0A499FJY3;Q96T37;Q96T37-2;Q96T37-3;Q96T37-4	0	1	0	0	0	0	0	0	0	0	0
A0A087WWP5;Q12962	0	1	0	0	0	0	0	0	0	0	0
A0A087WWP8;A0A0C4DGT8;A0A0C4DH79;Q5VWQ0;Q5VWQ0-4	0	0	0	0	0	0	0	0	0.501306	0	0.498694
A0A087WWQ2;Q92979;V9GYP5	0	1	0	0	0	0	0	0	0	0	0
A0A087WWR2;H3BQI4;H3BQS2;I3L2Z5;P56270;P56270-2;P56270-3;P56270-4	0	1	0	0	0	0	0	0	0	0	0
A0A087WWS1;Q96FV9	0	1	0	0	0	0	0	0	0	0	0
A0A087WWT7;A0A1W2PRP3;Q7Z7M1	0	0	0	0.536383	0	0	0	0	0.463617	0	0
A0A087WWU8	0	0.563533	0.436467	0	0	0	0	0	0	0	0
A0A087WWW9;O95999	0	0	0	0	0	0	1	0	0	0	0
A0A087WWY0;P08519	0	0	0	0	1	0	0	0	0	0	0
A0A087WX02;F8WB74;M0QYX1;P63302	0	0	0	0	0	0	0	0	1	0	0
A0A087WX10;G3V4M2;G3V5E8;P54803	0	1	0	0	0	0	0	0	0	0	0
A0A087WX11;J3KNG8;Q8TF40;Q8TF40-3	0	0	1	0	0	0	0	0	0	0	0
A0A087WX19;A0A087WX45;C9J5R6	0	0.210378	0	0	0	0	0	0.789622	0	0	0
A0A087WX22;H3BVG2;Q2M296-3;Q2M296-4	0	0	0	0	0.714101	0	0	0	0	0	0.285899
A0A087WX80;A0A087WYF1;P24043	0	0.521546	0	0	0	0	0	0.478454	0	0	0
A0A087WX97;Q9BXK5	0	0	0	0	0	0	0	1	0	0	0
A0A087WX99;A0A0G2JRA4;P55283;P55283-2	0	0	0	0	0.513463	0	0	0	0	0	0.486537
A0A087WXB0;O15126	0	0	0	0	0	0.520668	0	0	0.479332	0	0
A0A087WXB8;C9J0E2;C9J480;C9JWJ3;C9JXM2;Q9Y274	0	0	0	0	0	0	0	0	1	0	0
A0A087WXC5;E7ESZ7;O95299	0	0	0	0	0	0	0	1	0	0	0
A0A087WXD1;Q96T83	0	0	0	0	0	0	0	0	1	0	0
A0A087WXF8;A0A087WYV3;A0A0D9SEW3;Q9NP64;Q9NP64-2;Q9NP64-3	0	0	0	0.542424	0	0	0	0	0	0	0.457576
A0A087WXI2;Q9Y6R7	0	0.622989	0.377011	0	0	0	0	0	0	0	0
A0A087WXI5;P12830;P12830-2
A0A087WXK4;Q7Z3F1	0	0	0	0	0	0	0	0	1	0	0
A0A087WXL0;A0A087X1G7;A0A0J9YX89;A0A3B3IT39;A8MZD0;O60613;O60613-2	0	0	0	0	0.724485	0	0	0	0	0	0.275515
A0A087WXL6;B7Z879;Q9H270	0	0	0	0	0	1	0	0	0	0	0
A0A087WXM6;A0A0A6YYL6;J3KRX5;J3QQT2;P18621;P18621-3	0	0	0	0.284517	0.452736	0	0	0.262748	0	0	0
A0A087WXN9;Q765P7	0	0	0	0	0	0	1	0	0	0	0
A0A087WXP0	0	0	0	0	0	0	0	0	1	0	0
A0A087WXS6;C9JBF1	0.69608	0	0.30392	0	0	0	0	0	0	0	0
A0A087WXU0;A0A2R8Y4J4;Q9NWS8;Q9NWS8-2	0	0	0	0	0	0	0	1	0	0	0
A0A087WXV4;P41235;P41235-2;P41235-4;P41235-5;P41235-6	0	0.511953	0	0	0	0	0	0	0.203732	0	0.284315
A0A087WXW3;Q9Y3P8	0	1	0	0	0	0	0	0	0	0	0
A0A087WXW6;A0A140TA70;A0A140TA74;A9JR48;Q9BXA9;Q9BXA9-2;Q9BXA9-3;Q9BXA9-4	0	0.282593	0	0	0	0.383745	0	0	0.333662	0	0
A0A087WXX8	0	0	0.18514	0.370758	0	0	0	0.444102	0	0	0
A0A087WY00;F8W6H6;F8WE88;G3V394;Q9Y4I1;Q9Y4I1-2;Q9Y4I1-3	0	0.669034	0	0	0	0	0	0	0	0	0.330966
A0A087WY55;Q9NP79	0	0	0	0	0	0	1	0	0	0	0
A0A087WY67;P0CG29;P0CG30;Q6ICJ4	0	0	0	0	0	0	1	0	0	0	0
A0A087WY71;Q96CW1;Q96CW1-2	0	0	0	0.460255	0.539745	0	0	0	0	0	0
A0A087WY85;A0A0A0MQU3;D6RAH7;D6RFM0;H9KV45;P61077;P61077-2;P61077-3;P62837;P62837-2	0	0	0	0	0	0	1	0	0	0	0
A0A087WYA1;Q9UKN7	0	0	0.177035	0	0	0	0	0.822965	0	0	0
A0A087WYD6;A0A0G2JLV0;Q03519;X5CMH5	0	0	0	0	1	0	0	0	0	0	0
A0A087WYF2;F5H2F2;P54687;P54687-2;P54687-3;P54687-4;P54687-5	0	0	0	0	0.39776	0.253212	0	0	0	0	0.349028
A0A087WYF7;Q6UXV4	0	0.148583	0	0	0	0	0	0.851417	0	0	0
A0A087WYJ2;M0QZR8;M0R2B7;P28340	0	1	0	0	0	0	0	0	0	0	0
A0A087WYL6;A0A087WZG6;A0A087X1S9;Q8TEW8;Q8TEW8-2;Q8TEW8-3;Q8TEW8-5;Q8TEW8-6;R4GN62
A0A087WYM1;C9JRR9;P42575;P42575-2;P42575-3	0	0	1	0	0	0	0	0	0	0	0
A0A087WYM3;A0A0A0MRF5;E7EWX6;Q8IXJ6;Q8IXJ6-2;Q8IXJ6-3;Q8IXJ6-4
A0A087WYM5;A0A494C058;A0A494C075;A0A494C0M8;A0A494C171;A0A494C1C3;Q9BVV6;Q9BVV6-2;Q9BVV6-3;Q9BVV6-4	0	0	0	0	0	0	0	1	0	0	0
A0A087WYN9;Q7Z478	0	0	0	1	0	0	0	0	0	0	0
A0A087WYP2;Q8IZQ5	0	0	0	0	0	0	1	0	0	0	0
A0A087WYR0;P09132	0	0	0	0	1	0	0	0	0	0	0
A0A087WYS3;Q9ULU4;Q9ULU4-10;Q9ULU4-11;Q9ULU4-12;Q9ULU4-13;Q9ULU4-19;Q9ULU4-22;Q9ULU4-7;Q9ULU4-8;Q9ULU4-9	0	0	0	0	0	0	1	0	0	0	0
A0A087WYT3;Q15185;Q15185-4	0	0	0	0	0	0	1	0	0	0	0
A0A087WYV9;A0A087X1F5;P57105	0	0	0	0	0	0	0	1	0	0	0
A0A087WYX8;A0A1W2PQW0;A0A590UJL7;A0A5F9ZH12;A0A5F9ZHT2;A0A6Q8PH73;Q14CM0	0	0	0.553732	0	0	0.446268	0	0	0	0	0
A0A087WYY0;A0A087X260;B1AKP7;G3V162;Q13148	0	1	0	0	0	0	0	0	0	0	0
A0A087WZ13;E9PAU2;Q8IY67;Q8IY67-2	0	0	0	0	0	0	1	0	0	0	0
A0A087WZ32;A8K727;Q9HB19	0	0	0	0	0	0	1	0	0	0	0
A0A087WZ40;Q14244;Q14244-6;Q14244-7	0	0	0	0	0	0	1	0	0	0	0
A0A087WZ50;Q8TCT7;Q8TCT7-2;Q8TCT7-4	0	0	0	0	0	0	1	0	0	0	0
A0A087WZ62;Q9H6U8;Q9H6U8-3	0	0	0	0	1	0	0	0	0	0	0
A0A087WZ97;A0A087WZK6;A0A087X2C2;Q5T7M9	0	0	0	0	0	0	0	0	1	0	0
A0A087WZB5
A0A087WZC1;Q6IN84;Q6IN84-2	0	0.419462	0	0	0	0	0	0.580538	0	0	0
A0A087WZC2;A0A0C4DGS8;E0YMJ8;P35680;P35680-2;P35680-3;P35680-4	0	1	0	0	0	0	0	0	0	0	0
A0A087WZE9	0	1	0	0	0	0	0	0	0	0	0
A0A087WZG4;A0A3B3IPE9;A0A590UK10;Q6ZSZ5;Q6ZSZ5-1;Q6ZSZ5-2;Q6ZSZ5-5;Q6ZSZ5-6	0	0	0	0	0	0	1	0	0	0	0
A0A087WZJ5	0	0	0	0.473314	0	0	0	0.288709	0	0	0.237977
A0A087WZK0;M0R1T4;P49366;P49366-2;P49366-3	0	0	0	0	0	0	0	0	0	0.441074	0.558926
A0A087WZK9;B3KS98;O15372	0.640709	0	0	0	0	0.359291	0	0	0	0	0
A0A087WZM2;D6REQ6;D6RHI9;O00584	0	0.494438	0	0	0	0	0	0	0	0.505562	0
A0A087WZM8;Q8TBM7;Q8TBM7-2;Q8TBM7-3	0	0	0	0	0.502797	0	0	0	0	0	0.497203
A0A087WZN1;O43837	0	0	0	0	0	0	0	1	0	0	0
A0A087WZP9	0	0	0	0	0.643989	0	0	0	0	0	0.356011
A0A087WZQ7;Q9H115	0	0	0	0	0	0	0	0	0.455859	0	0.544141
A0A087WZT0;M0QY61;M0QZ22;M0R0X3;Q5PRF9	0	0	0	0	0	0.428806	0	0	0.571194	0	0
A0A087WZT2;Q6UX53	0	0	0.547721	0	0	0	0	0	0	0.452279	0
A0A087WZT3;Q9H3K6	0	0	0	0	0	0	1	0	0	0	0
A0A087WZU2;E5RGN0;Q00536;Q00536-2;Q00536-3	0	0	0	0	0	0	1	0	0	0	0
A0A087WZU5;O43657	0	0	0	0	0	1	0	0	0	0	0
A0A087WZV0;O43314	0	1	0	0	0	0	0	0	0	0	0
A0A087WZY2;A6NIV2;Q9P0U1
A0A087WZY5;A8MXH5;F5H3Q5;F5H851;Q14031;Q14031-2	0	0	0	0	0	0	0	0	1	0	0
A0A087X011;E9PES4;J3KPF9;Q9Y496	1	0	0	0	0	0	0	0	0	0	0
A0A087X020;Q9Y3A5
A0A087X080;A0A0U1RRH1;A0A0X1KG73;Q15413;Q15413-2;Q15413-3	0	0	1	0	0	0	0	0	0	0	0
A0A087X091	0	0	0	0	0	0.330395	0	0	0.669605	0	0
A0A087X0D5;P09668	0	0	0	0	0	0	0	0	0	1	0
A0A087X0F1;Q9UK61;Q9UK61-2;Q9UK61-3;Q9UK61-4	0	1	0	0	0	0	0	0	0	0	0
A0A087X0H7;A0A669KAW5;A0A669KB51;A0A6E1W401;Q8NEL9;Q8NEL9-2;Q8NEL9-3;Q8NEL9-4	0	0	1	0	0	0	0	0	0	0	0
A0A087X0H8;Q15714;Q15714-2;Q15714-3	0	0	0	0	0	0	1	0	0	0	0
A0A087X0H9;Q5T8P6	0	1	0	0	0	0	0	0	0	0	0
A0A087X0K0;P39059	0	0.586703	0	0	0	0	0	0.413297	0	0	0
A0A087X0K4;Q7Z408;Q7Z408-2;Q7Z408-4	0	0.654594	0	0	0	0	0	0	0	0	0.345406
A0A087X0K9	0	0	0	0	0.430075	0	0	0	0	0	0.569925
A0A087X0L7;E7EVY0;J3KNA0;Q15070;Q15070-2	0	0	0	0	0	0	0	1	0	0	0
A0A087X0M4;Q9BWU0	0	0	0	0	0	0	1	0	0	0	0
A0A087X0P0	0	0.426851	0	0	0	0	0	0	0.573149	0	0
A0A087X0Q9;Q9BVL4	0	0	0	0	0	0	1	0	0	0	0
A0A087X0R6;Q9UMY4;Q9UMY4-1	0	0	0	0	0	0	1	0	0	0	0
A0A087X0R7;Q9H4L4	0	1	0	0	0	0	0	0	0	0	0
A0A087X0R9;B8ZZK1;Q07837;Q07837-2;Q07837-5;Q07837-6;Q07837-7	0	0	0	0	0.559385	0	0	0	0	0	0.440615
A0A087X0S5;P12109	0	0.583089	0	0	0	0	0	0.416911	0	0	0
A0A087X0T5;Q96AB6
A0A087X0V5;P29728;P29728-2
A0A087X0W8;Q04206;Q04206-2;Q04206-3;Q04206-4;Q2TAM5	0	0	0	0	0	0	1	0	0	0	0
A0A087X0W9;Q8N6M0	1	0	0	0	0	0	0	0	0	0	0
A0A087X0X3;P52272;P52272-2	0	1	0	0	0	0	0	0	0	0	0
A0A087X0Y2;A0A087X248;A0A087X2I9;A0A096LPD8;F5GWV3;F5H3N7;F5H8B4;O14607;O14607-2;O14607-3;O14607-4;O14607-5	0	0.249571	0.482848	0	0	0	0	0	0.267582	0	0
A0A087X108	0	0	0	0	0	0	1	0	0	0	0
A0A087X117;A0A0G2JN29;Q15155	0	0	0	0.635215	0	0	0	0.364785	0	0	0
A0A087X127	0	0	0	0	0	0	0	0.387638	0.612362	0	0
A0A087X138;Q8TF71	0	0	0	0	0	0	0	0	0	0	1
A0A087X1A8;A0A2R8Y3X7;D3VVH9;F5H211;G3V3R7;P54252;P54252-1;P54252-4	0	0	0	0	0	0	1	0	0	0	0
A0A087X1B2	0	1	0	0	0	0	0	0	0	0	0
A0A087X1B6;E9PEG3;F5GZG9;P10275;P10275-3;P10275-4	0	0	0	0	0	1	0	0	0	0	0
A0A087X1D0	0	0.410035	0.269274	0	0	0	0	0	0.320691	0	0
A0A087X1E4;P53365;P53365-3	0	0	0.592961	0	0	0	0	0	0.407039	0	0
A0A087X1G1;H7BYD0;Q16718;Q16718-2	0	0	0	0	0	0	0	1	0	0	0
A0A087X1G4	0	0.251878	0.297011	0	0	0	0	0.451111	0	0	0
A0A087X1J2	0	0	0	0	0	0	0	1	0	0	0
A0A087X1J7;P22352	0	0	0	1	0	0	0	0	0	0	0
A0A087X1K1;Q96C00	0	1	0	0	0	0	0	0	0	0	0
A0A087X1N0;Q9H3C7	0	0	0.255392	0	0	0	0	0	0.275558	0	0.46905
A0A087X1N3;F8WC38;O75818;O75818-2	0.540306	0	0	0	0	0	0	0.459694	0	0	0
A0A087X1N7;P20929;P20929-2;P20929-3;P20929-4
A0A087X1P3;C9IYE1;F8W8P5;H7BYR4;Q86UW7;Q86UW7-2;Q86UW7-3	1	0	0	0	0	0	0	0	0	0	0
A0A087X1P5;J3KQ41;J3QT95;Q9H9Q2;Q9H9Q2-3	0.374074	0	0	0	0	0	0.625926	0	0	0	0
A0A087X1R3;A0A0C4DGX0;A6QL64;Q8N2N9	1	0	0	0	0	0	0	0	0	0	0
A0A087X1S3	0	0	0	0	0	0	0	0	0.467379	0	0.532621
A0A087X1U5;F5H7T0;F6RJM5;Q96S38;Q96S38-2	0	0	0	0	0	0.236356	0	0	0.535479	0.228165	0
A0A087X1W8;A0A0A0MTJ8;Q9BY67;Q9BY67-3;Q9BY67-4;Q9BY67-5;X5DQS5	0	0	0	0	0	0	0	0.561778	0	0	0.438222
A0A087X1Z1;A0A0G2JPW5;A0A0G2JQX1;A0A0G2JSA7;Q96RT8;Q96RT8-2	0	0	0	0	0	0	0	0	0.43317	0.263571	0.303259
A0A087X1Z3;Q9UL46	0.436295	0	0	0	0	0	0.563705	0	0	0	0
A0A087X236;A0A0A0MRE2;C9J2A8;Q9NVP4;Q9NVP4-2;Q9NVP4-3;Q9NVP4-4;Q9NVP4-5	0	0	0	0.346844	0	0	0	0.396783	0	0	0.256373
A0A087X241;Q2NKQ1;Q2NKQ1-3;Q2NKQ1-4	0	0	0.276877	0	0	0	0	0	0.723123	0	0
A0A087X256;Q2M389	0	0	0	0	0	1	0	0	0	0	0
A0A087X266;Q9BXJ8	0	0	0	0	1	0	0	0	0	0	0
A0A087X279;P09913	0.381122	0	0	0	0	0	0.618878	0	0	0	0
A0A087X283;A0A1B0GX65;B7Z306;C9J180;C9J2P0;H7C061;P51965;P51965-2;P51965-3;Q969T4;Q96LR5;R4GN77;R4GND1	0	0	0	0	0	0.379496	0	0	0.620504	0	0
A0A087X294;O75914;O75914-2;O75914-3;O75914-4	0	0	0	0	0	0	1	0	0	0	0
A0A087X295;E9PDU5;Q9NNW5	1	0	0	0	0	0	0	0	0	0	0
A0A087X296;P23219;P23219-2;P23219-3;P23219-4;P23219-5;P23219-6	0	0.270465	0	0	0	0	0	0.729535	0	0	0
A0A087X2A7;H0YBA5;H7BY63;Q8NB25;Q8NB25-2;Q8NB25-3;Q8NB25-4	0	0	1	0	0	0	0	0	0	0	0
A0A087X2B2;E9PMH5;Q13490;Q13490-2	0	0	0	0	0	0	0	1	0	0	0
A0A087X2B5;P35613;P35613-2	0	0	0	0	0.493607	0	0	0	0	0	0.506393
A0A087X2D5;Q9BRJ2	0	0.311631	0	0	0	0	0	0.688369	0	0	0
A0A087X2D8;O60271-2;O60271-4	0	0	0.442704	0	0	0	0	0	0.557296	0	0
A0A087X2G6;A0A0C4DGU5;D6RIC3;Q9Y3C1;Q9Y3C1-2;Q9Y3C1-3	0	0.663686	0	0	0	0	0	0.336314	0	0	0
A0A087X2I1;P62333	1	0	0	0	0	0	0	0	0	0	0
A0A088AWN3;A0A0A0MSY4;Q9BZ29;Q9BZ29-3;Q9BZ29-4;Q9BZ29-5	0	0	0	0	0	0	0	1	0	0	0
A0A088AWN8;E7EP87;E9PH27;J3KS48;J3KT43;J3QRB0;Q9UHQ1;Q9UHQ1-2;Q9UHQ1-3;Q9UHQ1-4	0	0	0	0	0	0.515642	0	0	0.484358	0	0
A0A088AWP2;A0A0C4DG41;A8MX39;A8MZ24;B5MDW0;P11308;P11308-1;P11308-2;P11308-3;P11308-5;P11308-6	0	0.690144	0.309856	0	0	0	0	0	0	0	0
A0A088AWP5;E9PDC2;H7BZH9;Q8WUY3;Q8WUY3-2;Q8WUY3-3;Q8WUY3-4	0.707156	0	0	0	0	0.292844	0	0	0	0	0
A0A090HNM7;A0A1W2PS85;P28715;R4GMW8
A0A096LNH6;Q14185	0	1	0	0	0	0	0	0	0	0	0
A0A096LNV3;A0A096LP02;Q9Y508;Q9Y508-2	0.634039	0	0	0	0	0.365961	0	0	0	0	0
A0A096LP07;A0A096LPJ3;A8K070	0	0	0	0.315629	0	0	0	0.373012	0	0	0.311359
A0A096LP22;A0A096LP34;C9J7Z1;Q86Y79	0	0	0	0	0	0	0	1	0	0	0
A0A096LP69	0	0	0.448056	0	0	0	0	0	0	0	0.551944
A0A096LPC5;A0A0A0MR88;Q9Y4E1;Q9Y4E1-1;Q9Y4E1-2;Q9Y4E1-6	0	0	0	0	0	0	0	0	1	0	0
A0A096LPE2	0	0	0.562647	0	0	0	0	0	0	0.437353	0
A0A096LPI6	0	0	0	0	0	0	0	1	0	0	0
A0A096LPJ4;P05161	0	0	0	0	0	0	1	0	0	0	0
A0A096LPJ9;A0A140G945;A0A140G945-2;E7EWH7;P02489
A0A0A0MQR2;Q9BY42	0	0	0	0	0	0	1	0	0	0	0
A0A0A0MQR4;I3L2J0;Q96RK0	0	0	0	0	0	0	1	0	0	0	0
A0A0A0MQS1;Q53H96;Q53H96-2	0.462613	0	0	0	0	0	0.537387	0	0	0	0
A0A0A0MQS9;A0A0A0MTC7;Q16363;Q16363-2	0	0.493732	0	0	0	0	0	0.506268	0	0	0
A0A0A0MQT0;P09455	0	0	0	0	0	0	1	0	0	0	0
A0A0A0MQU0;Q9BV38;U3KQC1	0	1	0	0	0	0	0	0	0	0	0
A0A0A0MQU4;Q96I15	0	0	0	0	0	0	1	0	0	0	0
A0A0A0MQU7;A0A0A0MTK8;F5H0K0;P20823;P20823-2;P20823-3;P20823-7;U3KQS6	0	1	0	0	0	0	0	0	0	0	0
A0A0A0MQV6;P09038;P09038-1;P09038-2;P09038-3	0	0.561573	0	0	0	0	0	0	0	0	0.438427
A0A0A0MQV8	0	0	0	0	0	0	0	0	0	0.290576	0.709424
A0A0A0MQX1;D6RGD1;Q9HD67	0	0	0	0	0	0	0	0	0	0	1
A0A0A0MQX8;C9JP00;Q9NR56;Q9NR56-2;Q9NR56-5;Q9NR56-6;Q9NR56-7	0	0.558242	0	0	0	0	0	0	0	0.441758	0
A0A0A0MQY7;A0A3B3ISH2;Q5VU97
A0A0A0MR02;P45880;P45880-1;P45880-2	0	0	0	0	0	0	0	1	0	0	0
A0A0A0MR03;A0A0J9YWB6;A0A0J9YWJ4;K7EJD2;Q9Y5B0;Q9Y5B0-4	0	0	0	0	0	0	0.647248	0	0.352752	0	0
A0A0A0MR05;H3BM50;H3BN58;H3BPT1;H3BPU5;Q9BVC4;Q9BVC4-4;Q9BVC4-5	0.368608	0	0	0	0	0.307601	0	0	0.323791	0	0
A0A0A0MR07;F5H5P4;P15498;P15498-2;Q96D37	1	0	0	0	0	0	0	0	0	0	0
A0A0A0MR09;P43378	0	0	1	0	0	0	0	0	0	0	0
A0A0A0MR11;A0A0A0MRS1;Q06730;Q06730-2;Q06730-3	0.714719	0	0	0	0	0	0	0	0.285281	0	0
A0A0A0MR25;A0A5S6RJB7;D2CGD1;E7EVR7;H7BXU9;H7C265;P21802;P21802-15;P21802-16;P21802-17;P21802-18;P21802-2;P21802-20;P21802-21;P21802-22;P21802-23;P21802-3;P21802-4;P21802-5;P21802-6;P21802-8;S4R381	0	0.269072	0.23659	0	0	0	0	0	0	0	0.494337
A0A0A0MR36;Q9ULV0-2	0	0	0	0	0	0	0	0	0.410559	0	0.589441
A0A0A0MR51;H7C2V0;O60427	0	0	0	0	0.523701	0	0	0	0	0	0.476299
A0A0A0MR67;A0A0A0MSA1;E9PDI6;F5GY28;F5H522;Q13936;Q13936-10;Q13936-11;Q13936-12;Q13936-13;Q13936-14;Q13936-15;Q13936-16;Q13936-17;Q13936-18;Q13936-19;Q13936-2;Q13936-20;Q13936-21;Q13936-22;Q13936-23;Q13936-24;Q13936-25;Q13936-26;Q13936-27;Q13936-28;Q13936-29;Q13936-3;Q13936-30;Q13936-31;Q13936-32;Q13936-33;Q13936-34;Q13936-35;Q13936-36;Q13936-37;Q13936-4;Q13936-5;Q13936-6;Q13936-7;Q13936-8;Q13936…	0.578141	0	0	0	0	0	0	0	0.421859	0	0
A0A0A0MR74;O75907	0	0	0	0	0.446022	0	0	0.312553	0.241425	0	0
A0A0A0MR93;A0A0C4DH11;K7ELZ7;K7ES91;Q53F39;Q53F39-2;Q53F39-3	0	0	0	0	0	0	0	0	0.479496	0	0.520504
A0A0A0MRA5;B7Z4B8;M0R3F1;Q9BUJ2;Q9BUJ2-2;Q9BUJ2-4	0	1	0	0	0	0	0	0	0	0	0
A0A0A0MRA8;A8K968;Q9Y2J2;Q9Y2J2-2	0	0	0	0.529343	0	0	0	0	0	0	0.470657
A0A0A0MRB5;Q8WXG6;Q8WXG6-2;Q8WXG6-3;Q8WXG6-4;Q8WXG6-5;Q8WXG6-6;Q8WXG6-7;Q8WXG6-8	0	0	0	0	0	0	0.752484	0	0.247516	0	0
A0A0A0MRD0;A0A2R8YCE3;F5H4B4;F5H4B4-2
A0A0A0MRE5;Q9ULH1;Q9ULH1-2	0	1	0	0	0	0	0	0	0	0	0
A0A0A0MRF6;Q99996;Q99996-1;Q99996-3;Q99996-5;Q99996-6	0	0	0	0	0	0	1	0	0	0	0
A0A0A0MRF9;P16885	0.425089	0	0	0	0	0	0.574911	0	0	0	0
A0A0A0MRG8;Q16611	0	0	0	0	0	0	0	1	0	0	0
A0A0A0MRG9;B1AMJ5;Q5JTU8;Q96SN8;Q96SN8-2;Q96SN8-3;Q96SN8-4	0	0	0	0	0	0	0	0	0	0	1
A0A0A0MRH3;Q9Y2W7;Q9Y2W7-2;Q9Y2W7-3	0	0.320742	0	0	0	0	0	0	0.302799	0.37646	0
A0A0A0MRI1;Q8IXQ4
A0A0A0MRI2;Q9UNH7	0	0	0	0	0	0	1	0	0	0	0
A0A0A0MRJ0;Q5VT25;Q5VT25-2;Q5VT25-3;Q5VT25-4;Q5VT25-5;Q5VT25-6	0	0	0.354821	0.357404	0	0	0	0	0	0	0.287775
A0A0A0MRJ6	0	0	0	0	0	0	1	0	0	0	0
A0A0A0MRJ7;P12259	0	0	0	0	0.586972	0	0	0	0	0.413028	0
A0A0A0MRJ8;Q7Z6I6;Q7Z6I6-3	0	0	0.476539	0	0	0.227086	0	0	0	0	0.296375
A0A0A0MRM2;Q86VF7;Q86VF7-2;Q86VF7-3;Q86VF7-4	0	0	0.580257	0	0	0.419743	0	0	0	0	0
A0A0A0MRM9;Q14978;Q14978-2;Q14978-3	0	1	0	0	0	0	0	0	0	0	0
A0A0A0MRP6;B7ZLQ5;P28370;P28370-2	0	1	0	0	0	0	0	0	0	0	0
A0A0A0MRR7;P09234	0	1	0	0	0	0	0	0	0	0	0
A0A0A0MRT2;Q9BTA9;Q9BTA9-2;Q9BTA9-5	0.624868	0.375132	0	0	0	0	0	0	0	0	0
A0A0A0MRT6;Q8IZP0;Q8IZP0-2;Q8IZP0-3;Q8IZP0-4;Q8IZP0-5;Q8IZP0-6;Q8IZP0-9
A0A0A0MRW6;Q9H6R4;Q9H6R4-2;Q9H6R4-4	0	1	0	0	0	0	0	0	0	0	0
A0A0A0MRX1;A0A0R4J2E6;A0A494C0F8;A0A494C147;A0A494C1D9;B1APY9;P26378;P26378-1;P26378-2;P26378-3;P26378-4;P26378-5;Q12926;Q12926-2	0	0	1	0	0	0	0	0	0	0	0
A0A0A0MRX8;A0A1B0GWI9;A0A1B0GWJ4;A0A2R8Y7V8;O00712;O00712-4;O00712-5;Q5VW26;Q5VW27;Q5VW30;U3KQE8	0	1	0	0	0	0	0	0	0	0	0
A0A0A0MRY0;B0QYI1;Q8WUA7;Q8WUA7-2;Q8WUA7-3;Q8WUA7-4	0.44309	0	0	0	0	0	0.55691	0	0	0	0
A0A0A0MRZ1;Q9H9P5-1;Q9H9P5-3	0	0	1	0	0	0	0	0	0	0	0
A0A0A0MRZ4;E7EMV7;Q15025;Q15025-2;Q15025-3;Q15025-4;Q15025-5;Q15025-6;Q15025-7;Q15025-8	0	0	0	0	0	0	0	0	1	0	0
A0A0A0MS14	0.29514	0	0	0	0	0	0.70486	0	0	0	0
A0A0A0MS59;A0A0C4DFX4;Q6ZRS2;Q6ZRS2-2;Q6ZRS2-3	0	1	0	0	0	0	0	0	0	0	0
A0A0A0MS79;O14513	0	0.669968	0.330032	0	0	0	0	0	0	0	0
A0A0A0MS87	0	0	0	0	0	0	1	0	0	0	0
A0A0A0MS99;I3L4X2;P33527;P33527-2;P33527-3;P33527-5;P33527-9	0	0.344296	0	0	0	0	0	0	0	0	0.655704
A0A0A0MSA9;A0A0C4DG49;P15151;P15151-2;P15151-3;P15151-4	0	0	0	0	0	0	0	0	0	0	1
A0A0A0MSB4;Q6ZN50;Q969R2;Q969R2-2;Q969R2-3;Q969R2-6	0	0	1	0	0	0	0	0	0	0	0
A0A0A0MSB8;Q9UPT5;Q9UPT5-1;Q9UPT5-2;Q9UPT5-5;Q9UPT5-6
A0A0A0MSD0;Q4LDE5;Q4LDE5-3	0	0	0	0	0.545339	0	0	0	0.454661	0	0
A0A0A0MSE3;D3DNG8;P30556	0	0	0	0	0.55656	0	0	0	0	0	0.44344
A0A0A0MSG0;A6NGB9	0	0	0	0	0	0	1	0	0	0	0
A0A0A0MSH9;A0A494C1F7;A0A494C1P7;Q86WJ1;Q86WJ1-2;Q86WJ1-4	0	0.660925	0	0	0	0	0	0	0.339075	0	0
A0A0A0MSI2;B3KPJ4;Q8IXK0;Q8IXK0-2;Q8IXK0-3;Q8IXK0-4;Q8IXK0-5	0	0	0	0	0	0	1	0	0	0	0
A0A0A0MSI6;B7Z1P2;Q9H4M3;Q9H4M3-2	0.38965	0	0	0	0	0.200001	0	0	0.41035	0	0
A0A0A0MSI8;O00471	0	0	0	1	0	0	0	0	0	0	0
A0A0A0MSJ9;Q15283;Q15283-2	0	0	0	0	0	0	0	0	0	1	0
A0A0A0MSK3;A0A0C4DH47;A0A498U6I9;C9JS68;P24557;P24557-2;P24557-3;P24557-4;Q53F23	0	1	0	0	0	0	0	0	0	0	0
A0A0A0MSK6;Q13017;Q13017-2
A0A0A0MSL1;Q8TDM6;Q8TDM6-2;Q8TDM6-3;Q8TDM6-4
A0A0A0MSM0
A0A0A0MSP4;Q86WC4	0	0	0	0	0	0	0	0	0.522972	0.477028	0
A0A0A0MSQ0;P13797;P13797-2	0	0	0	0	0	0	1	0	0	0	0
A0A0A0MSS0;P60880	0	0	0	0	0.556257	0	0	0	0	0	0.443743
A0A0A0MSS7	0	0	0	0.381913	0	0	0	0.352654	0	0	0.265434
A0A0A0MSS8;P42330	0	0	0	0	0	0	1	0	0	0	0
A0A0A0MST8;C9JRP1;E9PFN4;Q9Y6M7;Q9Y6M7-12;Q9Y6M7-13;Q9Y6M7-2;Q9Y6M7-6;Q9Y6M7-7;Q9Y6M7-8;Q9Y6M7-9	0	0	0	0	0	0	0	0	0	0	1
A0A0A0MSU4;O94911-3	0	0	0	0	1	0	0	0	0	0	0
A0A0A0MSV9;A0A0G2JH37;A0A0G2JKZ1;A2AB90;O15533;O15533-2;O15533-3	0	0	0	0	0.738432	0	0	0	0	0	0.261568
A0A0A0MSW2;E9PEI2;Q9BQW3;Q9BQW3-1	0	0	0.334059	0	0	0	0	0	0.665941	0	0
A0A0A0MSX9;P41252	0.779353	0	0	0	0	0.220647	0	0	0	0	0
A0A0A0MSY7;O00142;O00142-4;O00142-6	0	0	0	0	0	0	0	1	0	0	0
A0A0A0MSZ9;Q05048	0	1	0	0	0	0	0	0	0	0	0
A0A0A0MT02;A2ABK4;P18615;P18615-3	0	1	0	0	0	0	0	0	0	0	0
A0A0A0MT16;Q86UQ4;Q86UQ4-3;Q86UQ4-4	0	0	0	0	0	0	0	0	0	0	1
A0A0A0MT32;P38571;P38571-2	0	1	0	0	0	0	0	0	0	0	0
A0A0A0MT35;A0A2P0CTB1;Q8TBF2;Q8TBF2-3
A0A0A0MT61;G5E979;H7BYM2;Q8WYN0;Q8WYN0-3;Q8WYN0-5	0	0	0.2507	0.7493	0	0	0	0	0	0	0
A0A0A0MT72;C9JUH3;Q9BSQ5;Q9BSQ5-2;Q9BSQ5-3	0	0	0	0	0	0.433321	0	0	0.566679	0	0
A0A0A0MT83;P26440	0	0	0	0	0	0	0	1	0	0	0
A0A0A0MT93	0	0.324926	0	0	0	0	0	0	0.675074	0	0
A0A0A0MTC2;D6RA37;D6RDV0;D6RIY7;Q13454;Q13454-2	0	0.190287	0	0	0.527561	0	0	0.282152	0	0	0
A0A0A0MTG5;P13232;P13232-2;Q5FBX5	0	0.540927	0	0.459073	0	0	0	0	0	0	0
A0A0A0MTH2;A0A0A0MTK6	0	0	0	0	0	0.365458	0	0	0.634542	0	0
A0A0A0MTH3	0	0	0	0.448767	0.551233	0	0	0	0	0	0
A0A0A0MTH9;O14981	0.521818	0	0	0	0	0.269178	0	0	0.209004	0	0
A0A0A0MTJ9;Q6PIU2;Q6PIU2-2	0	0	0	0	1	0	0	0	0	0	0
A0A0A0MTK0;A0A0A0MTP0;F5GWB1;Q7Z6B0;Q7Z6B0-2	0	0	0	0	0	0	1	0	0	0	0
A0A0A0MTK4;A0A1B0GTZ1;Q8NB59;Q8NB59-2;Q8NB59-3;Q8NB59-5;Q8NB59-6;Q8NB59-7	0	0	0	0	0	0	0	0.305039	0.694961	0	0
A0A0A0MTL6;Q6ZS17;Q6ZS17-2;Q6ZS17-3;Q6ZS17-4	0.680449	0	0	0	0	0.319551	0	0	0	0	0
A0A0A0MTL7;A0A0D9SGH8;C6ZRJ6;C6ZRJ7;C6ZRK5;E2GH26;Q5JRY3;Q5JRY4;Q5JRY5;Q5VVR7;Q9NQB0;Q9NQB0-10;Q9NQB0-11;Q9NQB0-12;Q9NQB0-13;Q9NQB0-14;Q9NQB0-15;Q9NQB0-16;Q9NQB0-17;Q9NQB0-2;Q9NQB0-3;Q9NQB0-4;Q9NQB0-5;Q9NQB0-6;Q9NQB0-7;Q9NQB0-8;Q9NQB0-9	0	0.338944	0	0	0	0	0	0.403874	0	0	0.257181
A0A0A0MTN0;Q13617;Q13617-2	0.403163	0	0	0	0	0	0.596837	0	0	0	0
A0A0A0MTN3	0	0	0.208749	0	0	0	0.791251	0	0	0	0
A0A0A0MTP7;F8VXG7;Q99590;Q99590-2	0	1	0	0	0	0	0	0	0	0	0
A0A0A0MTQ3;Q96N23;Q96N23-2	0	0.571335	0	0	0	0	0	0.428665	0	0	0
A0A0A0MTQ8;P0C221	0	0	0	0	0	0	0	0.664737	0.335263	0	0
A0A0A0MTR7;Q63HN8	0.612566	0	0	0	0	0.387434	0	0	0	0	0
A0A0A0MTS7;Q8WZ42;Q8WZ42-12;Q8WZ42-13;Q8WZ42-2;Q8WZ42-8	0	0.203916	0	0	0	0	0	0.796084	0	0	0
A0A0A0MTS9;K7EKZ0;K7EP24;K7ER94;Q2V2M9;Q2V2M9-2;Q2V2M9-3;Q2V2M9-4	0	0.484542	0	0	0	0	0	0	0	0	0.515458
A0A0A0MTU3;Q4ZIN3;Q4ZIN3-2	0	0	0	0	0.760299	0	0	0	0.239701	0	0
A0A0A6YYA0;Q86XR7-2;Q9Y3B3;Q9Y3B3-2	0	0	0	0	0	0	0	0	1	0	0
A0A0A6YYC0;E9PJN1;O75676;O75676-2	1	0	0	0	0	0	0	0	0	0	0
A0A0A6YYC7;Q96JP5;Q96JP5-2	0	0	0	0	0	0	1	0	0	0	0
A0A0A6YYG9;F8WCF6;F8WDD7;P59998;P59998-2;P59998-3	0.348463	0	0	0	0	0	0.651537	0	0	0	0
A0A0A6YYH1;Q7Z6K5;Q7Z6K5-2	0	0	0	0	0	0	1	0	0	0	0
A0A0A6YYI3;A0A0B4J1V8;A8MV53;Q9NQ55;Q9NQ55-2;Q9NQ55-3	0	1	0	0	0	0	0	0	0	0	0
A0A0A6YYL2;P0DMM9;P0DMM9-3;P0DMN0	0	0	0	0	0	0	1	0	0	0	0
A0A0A6YYL4;P57737-3	0	0	0	0.417239	0	0	0	0.582761	0	0	0
A0A0B4J1R2;Q9H6R3	0	0	0	0	0	0	0	1	0	0	0
A0A0B4J1R4;P32754	0	0	0	0	0	0	1	0	0	0	0
A0A0B4J1R7;Q96B45
A0A0B4J1S8;Q9UBF8;Q9UBF8-2;Q9UBF8-3	0	0	0	0	0	1	0	0	0	0	0
A0A0B4J1W0;B9TX62;F5GY88;H0YEG1;O75448;O75448-2	0	1	0	0	0	0	0	0	0	0	0
A0A0B4J1Y2;Q8NDW8;Q8NDW8-3;Q8NDW8-5;Q8NDW8-6;Q8NDW8-7	0	0	0	0.515965	0.484035	0	0	0	0	0	0
A0A0B4J1Z1;C9JAB2;Q16629;Q16629-2;Q16629-3;Q16629-4	0	1	0	0	0	0	0	0	0	0	0
A0A0B4J221;E9PR99;Q96LU5	0	0	0.517076	0	0	0	0	0.482924	0	0	0
A0A0B4J269	1	0	0	0	0	0	0	0	0	0	0
A0A0B4J291;Q8N8U2	0	0	0	0	0	0	0	0	1	0	0
A0A0B4J294;H3BP13;Q9UL33;Q9UL33-2	0	0	0	0	0	1	0	0	0	0	0
A0A0B4J297;I3L4V0;Q9BRA0;Q9BRA0-2	0	0	0	0	1	0	0	0	0	0	0
A0A0B4J2A0	0	0	0	0	0	0	1	0	0	0	0
A0A0B4J2C2;F8WF49;Q9Y2H0;Q9Y2H0-1;Q9Y2H0-3	0	0	0	0	0	0	1	0	0	0	0
A0A0B4J2C3;J3KPG2;P13693;Q5W0H4	0	0	0	0	0	0	1	0	0	0	0
A0A0B4J2D5;P0DPI2	0	0	0	0	0	0	0	1	0	0	0
A0A0B4J2E5;Q15269	0	1	0	0	0	0	0	0	0	0	0
A0A0B4J2F0	0	0	0	0	0	0	0	1	0	0	0
A0A0B4J2F8;E2QRJ6;F6S314;P52435	0	1	0	0	0	0	0	0	0	0	0
A0A0B4J2G4;Q15345;Q15345-3	0	0.486636	0	0	0	0.513364	0	0	0	0	0
A0A0C3SFZ9;M0QXD1;M0QY09;M0QZE1;M0QZI3;M0R1K4;M0R3E5;O14526;O14526-2;O14526-3	0	0	0	0	0	0.468546	0	0	0.531454	0	0
A0A0C4DFL7;Q16850	0	0	0	0	1	0	0	0	0	0	0
A0A0C4DFL8;F5GX28;O94953	0	1	0	0	0	0	0	0	0	0	0
A0A0C4DFM1;Q92544	0	0	0	0	0	0.265721	0	0	0.734279	0	0
A0A0C4DFM7;Q5TAX3	0.618037	0	0	0	0	0.381963	0	0	0	0	0
A0A0C4DFP6;Q5T4F6;Q9NQ79;Q9NQ79-2;Q9NQ79-3	0	0	0	0	0	0	0	1	0	0	0
A0A0C4DFP7;Q9BXJ1;Q9BXJ1-2	0	0	0	0.408518	0	0.257626	0	0	0	0	0.333856
A0A0C4DFR1;O75069;O75069-2;O75069-3;O75069-5	1	0	0	0	0	0	0	0	0	0	0
A0A0C4DFU4;Q9HBG7-4	1	0	0	0	0	0	0	0	0	0	0
A0A0C4DFV0;Q9H469	0	0	0	0	0	0	1	0	0	0	0
A0A0C4DFW4;Q5JUR7	0	1	0	0	0	0	0	0	0	0	0
A0A0C4DFX2;A0A286YFA9;A0A2R8Y5V8;A0A2R8YCY2;Q5TBA9	1	0	0	0	0	0	0	0	0	0	0
A0A0C4DFX9;Q9H3P2	0	1	0	0	0	0	0	0	0	0	0
A0A0C4DFY5;A8MXZ4;J9JIE0;Q9NQ84;Q9NQ84-2	0	0.330029	0	0	0	0	0	0	0	0	0.669971
A0A0C4DFY7;Q6UWW8;Q6UWW8-2	0	0.432662	0	0	0	0	0	0	0.254427	0	0.312911
A0A0C4DFZ2;P15289;P15289-2	0	0	0	0	0	0	0	0	0	1	0
A0A0C4DG02;F8WE91;Q9Y6K1;Q9Y6K1-2	0	1	0	0	0	0	0	0	0	0	0
A0A0C4DG17;C9J9K3;P08865	0	0	0	0.430556	0.569444	0	0	0	0	0	0
A0A0C4DG21;A0A7D9NKC8;E7EP65;E7EW77;E9PEZ7;F8WAL6;Q9NYB9;Q9NYB9-2;Q9NYB9-4	0	0	0.322417	0	0	0	0	0	0.291285	0	0.386298
A0A0C4DG26;Q9NP71;Q9NP71-2;Q9NP71-3;Q9NP71-4;Q9NP71-6	0	0	0	0	0	0	0	0	1	0	0
A0A0C4DG40;Q8NF91;Q8NF91-4
A0A0C4DG51;Q9NP80;Q9NP80-3	0	0	0	0.450193	0	0	0	0.549807	0	0	0
A0A0C4DG60;F8W7P9;Q9H903;Q9H903-1;Q9H903-3;Q9H903-5	0	0.39024	0	0.60976	0	0	0	0	0	0	0
A0A0C4DG62;F5GYV5;F8WCT1;H7BZV4;Q66PJ3;Q66PJ3-2;Q66PJ3-3;Q66PJ3-4;Q66PJ3-7	0	1	0	0	0	0	0	0	0	0	0
A0A0C4DG80;Q9P2N7;Q9P2N7-2;Q9P2N7-3;Q9P2N7-4;Q9P2N7-5	0.639485	0	0	0	0	0	0	0	0.360515	0	0
A0A0C4DG85;P40394;P40394-2	0	0	0	0	0	0	1	0	0	0	0
A0A0C4DG88;P14859;P14859-2;P14859-3;P14859-4;P14859-5;P14859-6	0	1	0	0	0	0	0	0	0	0	0
A0A0C4DG89;Q7L014	0	1	0	0	0	0	0	0	0	0	0
A0A0C4DG90;A4D0S4;A4D0S4-3	0	0.377529	0	0.622471	0	0	0	0	0	0	0
A0A0C4DG91;A0A2R8Y7V2;C9J9V6;C9JQB1;O75414	0	0	0	0	0	0	0	1	0	0	0
A0A0C4DG94	0	0	0	0	0.586722	0	0	0	0	0	0.413278
A0A0C4DG95;C9IYJ2;E9PD56;F8WDF7;H7BYG4;Q7Z7A4;Q7Z7A4-2;Q7Z7A4-4;Q7Z7A4-6;W5RWE6	0	0.438976	0	0	0	0	0	0	0.561024	0	0
A0A0C4DGA2;O75521;O75521-2	0	0	0	0	0	0	0	1	0	0	0
A0A0C4DGA6;Q14527;Q14527-2	0	1	0	0	0	0	0	0	0	0	0
A0A0C4DGA7;O94929;O94929-3	0	0.515322	0	0	0	0	0	0	0	0	0.484678
A0A0C4DGB0;Q9UIL1;Q9UIL1-2;Q9UIL1-3	0	0	0	0	0	0	1	0	0	0	0
A0A0C4DGB9	0	0	0	0	0	0	0	1	0	0	0
A0A0C4DGE4;A0A0J9YW33;A0A286YF28;Q13277;Q13277-2;Q13277-3	0	0	0	0	0.337857	0	0	0	0	0.306849	0.355293
A0A0C4DGE7;Q86UK5;Q86UK5-2;Q86UK5-3	0	0	0	0	0	0	1	0	0	0	0
A0A0C4DGF7;Q6UXC1;Q6UXC1-2;Q6UXC1-3	0	0.336226	0.345392	0	0	0	0	0.318382	0	0	0
A0A0C4DGG1;Q9UKS6	0	0	0	0	0.621478	0	0	0	0	0	0.378522
A0A0C4DGG9;A0A2R8Y212;A0A2R8Y425;A0A2R8Y521;A0A2R8Y5J0;A0A2R8YFK9;A0A2U3TZM0;F5GWX5;Q14839;Q14839-2	0	1	0	0	0	0	0	0	0	0	0
A0A0C4DGH0;Q5ZPR3;Q5ZPR3-3;Q5ZPR3-4	0	0	0	0	0.571792	0	0	0	0	0	0.428208
A0A0C4DGH6;A0JNW5	1	0	0	0	0	0	0	0	0	0	0
A0A0C4DGI4	0	1	0	0	0	0	0	0	0	0	0
A0A0C4DGM9;B7Z896;F5H3M2;Q9BVG8;Q9BVG8-2;Q9BVG8-4;Q9BVG8-5;Q9BVG8-6	0	0.326664	0	0	0	0	0	0.424972	0	0	0.248364
A0A0C4DGN6;J3QRU8;Q9Y2X7;Q9Y2X7-3	0	0	0	0	0	0	0	1	0	0	0
A0A0C4DGP0;E7EU35;Q9UKF7-2	0	0	0.426376	0	0	0	0.573624	0	0	0	0
A0A0C4DGQ4;Q86W25	0	0	0	0	0	0	1	0	0	0	0
A0A0C4DGQ5;P04632	0	0	0	0	0	0	1	0	0	0	0
A0A0C4DGQ8;Q6IAN0	0	0	0	0.314887	0.685113	0	0	0	0	0	0
A0A0C4DGR2;M0QY25;M0QYH7;M0QYQ4;M0QZQ2;Q71SY5;Q71SY5-4;Q71SY5-5;Q71SY5-6;Q86YD1;Q86YD1-2	0	0.581423	0	0	0	0	0	0	0.418577	0	0
A0A0C4DGR5	0	1	0	0	0	0	0	0	0	0	0
A0A0C4DGS1;P39656;P39656-3	0	0	0	0	0.392047	0	0	0.607953	0	0	0
A0A0C4DGV4;E9PLX3;O43504;R4GMU8	0	0	0	0	0	0	0	0	0	1	0
A0A0C4DGZ4;Q9Y5U4	0	0	0	0	0.509281	0	0	0	0	0	0.490719
A0A0C4DH01;Q9NVU0;Q9NVU0-2;Q9NVU0-3;Q9NVU0-4;Q9NVU0-5	0.725294	0	0	0	0	0.274706	0	0	0	0	0
A0A0C4DH07;Q8N2S1;Q8N2S1-2;Q8N2S1-3	0	0	0	0	0	0	0	0.452072	0.547928	0	0
A0A0C4DH13;E5RG96;J3KQJ9;Q8N2E2	0	0	0	0	0	0	0	0	0.443668	0	0.556332
A0A0C4DH16;B8ZZS0;H7BXT7;Q9NYM9	0	0	0	0	0	0	0	0	1	0	0
A0A0C4DH36	0	0.635869	0	0	0	0	0	0	0.364131	0	0
A0A0C4DH65	0.689666	0	0	0	0	0.310334	0	0	0	0	0
A0A0D2X7Z3;Q49AN0;Q49AN0-2	0	0	0	0	0	0	0	0	1	0	0
A0A0D5XQ77;A0A0U5Q247;A0A140T8Z5;A0A140T981;A0A140T9R6;A0A140T9Y4;A0A140T9Z9;A0A140TA15;P01920;Q29967	0	0	0.177543	0	0.42161	0	0	0	0	0	0.400847
A0A0D9SEI0;Q9P0P8	0	0	0	0	0	0	0	1	0	0	0
A0A0D9SEI3;A0A0D9SEN2;A0A0D9SER5;P21127;P21127-2;P21127-3;P21127-8	0	1	0	0	0	0	0	0	0	0	0
A0A0D9SEJ5;F5GY05;Q96EK7;Q96EK7-2	0.577312	0	0	0	0	0.422688	0	0	0	0	0
A0A0D9SEK1	0	0	0	1	0	0	0	0	0	0	0
A0A0D9SEN7;A0A2R8Y7Z3;I3L0L0;Q13950;Q13950-2;Q13950-3	0	0.457097	0	0	0	0	0	0.542903	0	0	0
A0A0D9SES8;H0YKN8;H0YKT5;H0YL70;H0YNI7;H0YNT2;Q04724;Q04726;Q04726-2;Q04726-3;Q04726-4;Q04726-5;Q04726-6;Q04726-7;Q04727;Q04727-2;Q04727-3;Q04727-4	1	0	0	0	0	0	0	0	0	0	0
A0A0D9SET2;A0A0D9SFD0;A0A0D9SGI5;A0A0R4J2G5;A0A1B0GTW4;A0A1B0GV32;D6R942;D6RB91;D6RC63;D6RCM6;D6RG14;D6RG21;D6RJA7;D6RJG6;D8L7E9;H0YM62;Q02078;Q02078-2;Q02078-3;Q02078-4;Q02078-5;Q02078-6;Q05BX2;Q06413;Q06413-2;Q06413-3;Q06413-4;Q06413-5;Q06413-6;Q14814;Q14814-2;Q14814-3;Q14814-4;Q14814-5;Q14814-6	0	1	0	0	0	0	0	0	0	0	0
A0A0D9SEU5;Q6VN20;Q6VN20-3;R4GMX8	1	0	0	0	0	0	0	0	0	0	0
A0A0D9SEX5;Q9H6R6;Q9H6R6-2	0	0	0.180317	0	0.326605	0	0	0	0.256248	0	0.236829
A0A0D9SEY1;E7EN19;E7ENQ1;G3XAA2;G5E948;H7C360;O95819;O95819-2;O95819-3;O95819-4;O95819-5;O95819-6	0	0	0.666961	0	0	0	0	0	0.333039	0	0
A0A0D9SF07	0	0	1	0	0	0	0	0	0	0	0
A0A0D9SF44;A0A0R4J2E2;Q9Y3T6;Q9Y3T6-3	0	0	0	0	0	0	1	0	0	0	0
A0A0D9SF53;A0A0D9SFB3;A0A0D9SG12;A0A2R8Y4A4;A0A2R8Y645;A0A2R8YCW1;A0A2R8YF78;A0A2R8YFR4;A0A2R8YFS5;A0A2U3TZJ9;O00571
A0A0D9SF60;Q99569;Q99569-2	0	0.407455	0	0	0	0	0	0	0	0	0.592545
A0A0D9SF63;Q9BZK7	0	0.52731	0.47269	0	0	0	0	0	0	0	0
A0A0D9SFB1	0	0	0	1	0	0	0	0	0	0	0
A0A0D9SFB5;P08319;P08319-2	0	0	0	0	0	0	1	0	0	0	0
A0A0D9SFE1;Q9H936	0	0	0	0	0	0	0	1	0	0	0
A0A0D9SFG6;O43739;O43739-2;Q15438;Q15438-2;Q15438-3;Q99418;Q99418-2
A0A0D9SFJ2;A0A1B0GWF1;A0A2R8Y5Y4;A0A2R8Y6P1;Q6ZU35	0	0	0	0	0.562609	0	0	0	0	0	0.437391
A0A0D9SFK2;Q92614;Q92614-3;Q92614-4	0	1	0	0	0	0	0	0	0	0	0
A0A0D9SFM0;Q149N8;Q149N8-4	0	0	0.227066	0.437905	0	0	0	0	0	0	0.335029
A0A0D9SFR6;Q16760;Q16760-2;Q86XP1;Q86XP1-2;Q86XP1-3;Q86XP1-5	0	0	0	0	0	0	0	0	1	0	0
A0A0D9SFT8	0	0	0	0	0	0	0	0	1	0	0
A0A0D9SG52;Q6ZWI9	0	0	0	0	0	0	0	0	0.597588	0.402412	0
A0A0D9SG71;P49459;P49459-3	0	0	1	0	0	0	0	0	0	0	0
A0A0D9SG72;A0A1B0GTP9;A0A1B0GVQ5;A0A1B0GWF2;A0A2R8Y5D4;P61764;P61764-2	0	0	0	0	0.644566	0	0	0	0	0	0.355434
A0A0D9SG79;Q9NZ09;Q9NZ09-3;Q9NZ09-4	0	0	0	0	0	0	0	0	1	0	0
A0A0D9SG96;Q9ULB1-3	0.661645	0	0.338355	0	0	0	0	0	0	0	0
A0A0D9SGD6;B0QZE2;B7Z2J6;E7ENI9;E7EV75;Q15326;Q15326-2;Q15326-5	0	1	0	0	0	0	0	0	0	0	0
A0A0D9SGE8;Q5JRC6;Q8IWS0;Q8IWS0-2;Q8IWS0-3;Q8IWS0-4;Q8IWS0-5	0	0	0	0	0.477804	0	0	0	0.2741	0	0.248096
A0A0D9SGF6;Q13813;Q13813-2	0	0	0	1	0	0	0	0	0	0	0
A0A0D9SGH0;A0A1B0GV11;Q92581;Q92581-2;Q92581-3	0	0	0	0	0	0.435951	0	0	0.564049	0	0
A0A0D9SGJ6;C9JFZ1;J3KPK1;J3KQV8;O43426;O43426-2;O43426-4	0	0	0	0	0	0	1	0	0	0	0
A0A0G2JH30;A0A0G2JPX0;A0A2R8YFP9;A6NK88;P49918;P49918-2
A0A0G2JH50;A0A0G2JIF0;A0A1W2PS56;A2BF26;Q5RIP0
A0A0G2JH68;O60610	0.310122	0	0	0	0	0	0.689878	0	0	0	0
A0A0G2JHC2;Q6NYC8	0	0	0	0	0	0	0	0	0	0	1
A0A0G2JHL0;A0A0G2JK44;A0A140T9E9;A0A140T9F7;A0A140T9V2;H0Y6K2;P25440;P25440-2;P25440-3;U3KQA6	0	1	0	0	0	0	0	0	0	0	0
A0A0G2JI43;A0A0G2JIJ2;A0A140T926;A0A140T9C9;A0A140T9I2;A0A140T9R0;A0A140T9R2;A0A140T9T8;A0A140T9U6;F6UB75;P28068	0	0	1	0	0	0	0	0	0	0	0
A0A0G2JIR1;A0A0G2JIS2;A0A0G2JK64;A0A0G2JRN8;A0A0G2JRR0;A2ABF8;A2ABF9;Q96KQ7;Q96KQ7-2	0	1	0	0	0	0	0	0	0	0	0
A0A0G2JIW1;P0DMV8;P0DMV9	0	0	0	0	0	0	1	0	0	0	0
A0A0G2JJD3;O95870	0	0	0	0	1	0	0	0	0	0	0
A0A0G2JJP1;Q9C019	0	0	0	0	0	0	0	0	0	1	0
A0A0G2JL52;A0A140T8Y0;A0A140TA35;B4E0K6;Q5ST30;Q5ST30-4	0	0	0	0	0	0	0	1	0	0	0
A0A0G2JLC7	0.633331	0	0	0	0	0.366669	0	0	0	0	0
A0A0G2JLK7	0	0	0	0	0.470064	0	0	0	0.529936	0	0
A0A0G2JLQ8;A0A0G2JLX3;A0A0G2JNC8;A0A0G2JP37;A0A0G2JPB6;A0A0G2JPQ2;F5H5B1;F5H7Q5;J3KN39;K7EJ90;K7ELX1;Q9NX02;Q9NX02-2;Q9NX02-3;Q9NX02-4	0	0	0	0	0	0	0	0	0	0	1
A0A0G2JM39;A0A0G2JN91;A0A0G2JNH1;M0QYD1	0	0.262603	0	0	0	0	0	0.737397	0	0	0
A0A0G2JM63;A0A0G2JNK3;A0A0G2JPH3;Q8WX94-2;Q8WX94-3	0	0	0	0.699084	0	0	0	0	0	0	0.300916
A0A0G2JM70;Q9NV79;Q9NV79-2;Q9NV79-3;V9GZ41	0	0	1	0	0	0	0	0	0	0	0
A0A0G2JMD2;A0A2R9YJI8	0	0	0	0	0.707094	0	0	0	0.292906	0	0
A0A0G2JMW3;A0A0G2JP44;Q9HBB8;Q9HBB8-2;Q9HBB8-4	0	0	0	0	0	0	0	0	0.59399	0.40601	0
A0A0G2JMX7;A0A0G2JPD5;A0A0G2JQJ7;A0A0G2JS76;P10636;P10636-6;P10636-7;P10636-8;P10636-9	0	0	0	0	0	0	0	0	0.452921	0.547079	0
A0A0G2JMZ6;O60282	0	0.550695	0	0	0	0	0	0	0.449305	0	0
A0A0G2JMZ8;Q16625	0	0.381699	0	0	0	0	0	0	0	0	0.618301
A0A0G2JN23;A0A0G2JQ38	0	0.680954	0	0	0	0	0	0	0	0	0.319046
A0A0G2JN42;A0A0G2JNJ8;Q6W4X9	0	0	0.634685	0	0	0	0	0	0.365315	0	0
A0A0G2JN53	0	0	0	0	0	0	0	1	0	0	0
A0A0G2JN84;P59817	0	0	0	0	0	0.396124	0	0	0.603876	0	0
A0A0G2JNW7;Q9Y666	0	0	0	0	0.62355	0	0	0	0	0	0.37645
A0A0G2JNZ2;A0A669KB89;Q14160	0	0	0	0.500347	0	0	0	0	0	0	0.499653
A0A0G2JPC8;B4DTC2;E7EPX8;E7ER82;Q8TC27	0.694591	0	0	0	0	0.305409	0	0	0	0	0
A0A0G2JPQ3;P17693;P17693-5;Q5RJ85;Q8MH48	0	0	0.630257	0	0	0	0	0	0	0	0.369743
A0A0G2JPZ6;A0A0J9YWU2;Q9H3Q3	0	0	0	0	0.48941	0	0	0.51059	0	0	0
A0A0G2JQ41;A0A1C7CYZ0;B7Z683;Q12979;Q12979-2;Q12979-4	0	0	0.473868	0	0	0	0	0	0.526132	0	0
A0A0G2JQC6;A0A0G2JQK9;A0A0G2JRT1;E7EWN1;Q99102-3	0	1	0	0	0	0	0	0	0	0	0
A0A0G2JRG1	0	0	0	0	0	0	0	1	0	0	0
A0A0G2JS52;Q01538;Q01538-2	0.595219	0	0	0	0	0	0	0.404781	0	0	0
A0A0J9YVP6;Q9UHX1-2	0	1	0	0	0	0	0	0	0	0	0
A0A0J9YVW4	0	0	0.33789	0	0	0	0.66211	0	0	0	0
A0A0J9YW18;F6RP06;Q12983	0	0	0	0	0	0	0	1	0	0	0
A0A0J9YW63	0	1	0	0	0	0	0	0	0	0	0
A0A0J9YW64;A6NIW2;Q5JSL3	0	0	0	0	0	0.455656	0	0	0.248675	0	0.295669
A0A0J9YWD2;A0A0J9YX19;A0A0J9YXY6;A0A0J9YYK8;A0A1B0GTJ5;A0A1B0GU79;A0A1B0GUR8;A0A1B0GVR1;Q9UBY8	0	0	0	0	0	0	0	0	0.407752	0	0.592248
A0A0J9YWD5;A0A0J9YX88;A0A0J9YYB5;B7ZM65;E9PJ24;F8WEF5;Q9P1Y6;Q9P1Y6-2;Q9P1Y6-3	0	1	0	0	0	0	0	0	0	0	0
A0A0J9YWE1;A0A0J9YWN0	0	0	0	0	0	0	0	0	0.517531	0	0.482469
A0A0J9YWL0;Q9Y4K1	0	0	0	0	0	0	0	0	0	0	1
A0A0J9YWR7;A0A0J9YXE4;Q8N2F6;Q8N2F6-2;Q8N2F6-3;Q8N2F6-4	0	0	0	0	0	0	0	1	0	0	0
A0A0J9YWV4;O75154;O75154-2;O75154-3;X6RFI8	0	0	0	0	0	0	1	0	0	0	0
A0A0J9YX34;A0A6Q8PEY7;A0A6Q8PF18;A0A6Q8PF63;A0A6Q8PF74;A0A6Q8PFB0;A0A6Q8PFI4;A0A6Q8PFM2;A0A6Q8PFS5;A0A6Q8PFV0;A0A6Q8PFX3;A0A6Q8PG16;A0A6Q8PGE9;A0A6Q8PGG4;A0A6Q8PGL5;A0A6Q8PH06;A0A6Q8PHE9;A0A6Q8PHG4;A0A6Q8PHP4;A0A6Q8PHR6;C9J084;Q9C040;Q9C040-2	0	0.622905	0	0.377095	0	0	0	0	0	0	0
A0A0J9YX62;C9J2C4;O75190;O75190-2;O75190-3
A0A0J9YX66;A0A0J9YXJ0;A0A1B0GU44;A0A1B0GUN8;E9PC62;O95319;O95319-2;O95319-3;O95319-4;O95319-5;Q5VZZ6;V9GYD9	0	0.318211	0.258911	0	0	0	0	0	0	0	0.422877
A0A0J9YXF2;Q15165;Q15165-1	0	0	0	0	1	0	0	0	0	0	0
A0A0J9YXM6;Q562E7	0.689482	0	0	0	0	0.310518	0	0	0	0	0
A0A0J9YXN7	0	0	1	0	0	0	0	0	0	0	0
A0A0J9YXT0;H7C5H6;Q9H0F7;Q9H0F7-2	0.614605	0	0	0	0	0.385395	0	0	0	0	0
A0A0J9YY17;A0A1C7CYW8;A0A669KB38;Q8IVF4	0	0	0	0.575894	0.424106	0	0	0	0	0	0
A0A0J9YY72;A0A1W2PQQ1;Q5HYW2	0	0	1	0	0	0	0	0	0	0	0
A0A0J9YYF0	0	0.580689	0	0	0	0	0	0.419311	0	0	0
A0A0J9YYF7;Q86T65;Q86T65-4	0	0	0	0	0.428005	0	0	0.571995	0	0	0
A0A0K0K1A5	0.66329	0	0	0	0	0.33671	0	0	0	0	0
A0A0R4J2E8;D6REM6;P43243	0	1	0	0	0	0	0	0	0	0	0
A0A0R4J2F3;P0DPB6	0	1	0	0	0	0	0	0	0	0	0
A0A0R4J2F6;Q12894;Q12894-2	0	0	0	0	0	1	0	0	0	0	0
A0A0S2Z4L3;A0A3B3ISJ1;G5E9F8;P07225	0	0	0	0	0.71457	0	0	0	0	0	0.28543
A0A0S2Z4L7;O60603	0	0	0	0	0.400038	0	0	0	0.225672	0	0.374289
A0A0S2Z4Q7;A0A1W2PQQ6;A0A1W2PQR0;A0A1W2PR45;A0A1W2PRC6;A0A1W2PRD9;A0A1W2PRY1;A0A1X7SBT2;C9JYS9;Q9UNP4;Q9UNP4-2;Q9UNP4-3	0	0	0	0	0	0	0	0	1	0	0
A0A0S2Z5D0;A0A1B0GTU6;H3BUV4;Q9NWW5;Q9NWW5-2	0	0	0	0	0.711366	0	0	0	0	0	0.288634
A0A0U1RQC7	0	0	1	0	0	0	0	0	0	0	0
A0A0U1RQE4;A0A494C1M0;Q5HYK7;Q5HYK7-2;Q5HYK7-3	0	0	0	0	0	0	1	0	0	0	0
A0A0U1RQK7
A0A0U1RQK9	0	0.559209	0	0	0	0	0	0	0.440791	0	0
A0A0U1RQM0;H0YKX3;H0YMA4;Q15004	0	0	0.217489	0	0	0	0	0	0.171715	0.281976	0.32882
A0A0U1RQQ9;Q6P3W7	0	0	0	0	0	1	0	0	0	0	0
A0A0U1RQS4;A0A0U1RR93;Q9BYB0;Q9BYB0-3	0	0	0.276956	0	0	0	0	0	0	0.265158	0.457886
A0A0U1RQT8;Q8TCZ2;Q8TCZ2-2;Q8TCZ2-3;Q8TCZ2-5	0	0	0.17066	0	0.41719	0	0	0	0	0	0.41215
A0A0U1RQW6;E7EPU2;Q9Y2E4
A0A0U1RQY4	0	0.326915	0.270115	0	0	0	0	0	0	0	0.40297
A0A0U1RR06;Q9Y484;Q9Y484-2;Q9Y484-3	0	0	0	0	0	0	1	0	0	0	0
A0A0U1RR16;A0A3B3IRZ7;Q8NEY4;Q8NEY4-2
A0A0U1RR25	0.411029	0	0	0	0	0.247938	0	0	0.341032	0	0
A0A0U1RR27;H3BTW5;Q7Z401;Q7Z401-2	1	0	0	0	0	0	0	0	0	0	0
A0A0U1RR32;A0A0U1RRH7;P0C0S8;P20671;Q96KK5;Q99878;Q9BTM1	0	1	0	0	0	0	0	0	0	0	0
A0A0U1RR76;A6NJ78;A6NJ78-2;A6NJ78-4;P0C7V9	0	0	0	0	0	0	0	1	0	0	0
A0A0U1RRA6;B5MCG9;B5MCU0;H7C0E9;Q9Y2K5	0	0	0	0	0	0	1	0	0	0	0
A0A0U1RRB6;J3QT38;Q9Y2D4;Q9Y2D4-2	0	1	0	0	0	0	0	0	0	0	0
A0A0U1RRB9;F2Z2V1;Q96C11;Q96C11-3	0	0	0	0	0	0	1	0	0	0	0
A0A0U1RRK1;A0A286YF11;F6XEV2;Q9BPX6;Q9BPX6-3	0	0	0	0	0	0	0	1	0	0	0
A0A0U1RRL7	0	0	0	0	0	0	0	1	0	0	0
A0A0U1RRL8;Q8TB22;Q8TB22-2;Q8TB22-3	0	0	0	0	0	0	0	1	0	0	0
A0A0U1RRM1;Q8WXI9	0	0.643475	0	0	0	0	0	0	0	0	0.356525
A0A126GWB3;P47888	0	0	0.62942	0	0	0	0	0	0	0	0.37058
A0A140LJL2;Q8N350	0.644627	0	0.355373	0	0	0	0	0	0	0	0
A0A140T8Y3;A0A140T902;A0A140T9C0;A0A140TA33;A0A140TA41;A0A140TA52;A0A3B3ISX9;P22105;P22105-1;P22105-4	0	1	0	0	0	0	0	0	0	0	0
A0A140T913;A0A140T933;A0A140T955;A0A140T9I0;A0A140T9X5;A0A1W2PRT9;Q53Z42	0	0	0	0	0.678261	0	0	0	0	0	0.321739
A0A140T951	0	0	0	0	0.58949	0	0	0	0	0	0.41051
A0A140T962;A0A140T9B3;A0A140T9J9;A0A1W2PR11;Q5QT33	0	0	0.276809	0	0.723191	0	0	0	0	0	0
A0A140T9B9;A0A140T9N6;A0A140T9V9;H0Y551;P14373	0	0	0	0	0	0	0	0	0.485403	0.255218	0.259379
A0A140T9G8;Q0P5T2;Q5SQH8;Q5SQH8-2;Q5SQH8-4	0	0.385363	0	0	0	0	0	0.614637	0	0	0
A0A140T9T7;Q03518	0	0	0	0	0.721972	0	0	0	0	0	0.278028
A0A140TA01;E9PQT8;E9PQZ5;O43189;O43189-2	0	0	0.507754	0	0	0.492246	0	0	0	0	0
A0A140TA09;Q99942	0	0	0	0	0	0	0	0	0	1	0
A0A140TA86;Q5XKP0	0	0	0	0	0	0	0	1	0	0	0
A0A140VK87;H0Y7R1;Q8TBZ2	0	0.565303	0	0	0	0	0	0	0.434697	0	0
A0A182DWF2;A0A182DWF3;Q9NNW7;Q9NNW7-2	0	0	0	0	0	0	0	1	0	0	0
A0A182DWH7;P49908	0	0	0	0	0	0	0	0	0	1	0
A0A182DWI4;E9PN30;Q9BQE4	0	0	0	0	0.517395	0	0	0	0	0	0.482605
A0A1B0GTB0;A0A1B0GTU8;A0A1B0GU12;A0A1B0GUT7;A0A1B0GVB9;A0A1B0GVC7;A0A1B0GVW0;A0A1B0GWJ8;A0A1C7CYW4;B7Z413;H7C3E1;O75787;O75787-2	0	0	0	0	0.568104	0	0	0	0	0	0.431896
A0A1B0GTF3;A0A6I8PIT5;A0A6I8PIW1;A0A6I8PLB1;O43301	0	0.463008	0	0	0	0	0	0	0	0	0.536992
A0A1B0GTG2;A0A1B0GW77;P49419;P49419-2	0	0	0	0.394083	0	0	0	0.605917	0	0	0
A0A1B0GTH8;A0A1B0GUV4	0	0	0.401959	0.598041	0	0	0	0	0	0	0
A0A1B0GTJ7;A0A1B0GWJ0;P30566	0.334798	0	0	0	0	0	0.665202	0	0	0	0
A0A1B0GTJ8;A0A1B0GV63;A0A1B0GVK1;A0A1B0GWJ2;A0A3F2YNW7;A0A6Q8NVI4;H0Y7H8;Q8NFD5;Q8NFD5-2;Q8NFD5-3;Q8NFD5-4	0	1	0	0	0	0	0	0	0	0	0
A0A1B0GTK6
A0A1B0GTL7;A0A1W2PQ11;A0A1W2PQ86;A0A1W2PQJ4;Q02246	1	0	0	0	0	0	0	0	0	0	0
A0A1B0GTM1;A0A1B0GUM5;E7ETX0;Q8NHX9	0	0	0	0	0	0	0	0	1	0	0
A0A1B0GTM3;A0A1B0GUA4;A0A1B0GUH5;A0A1B0GW68;Q13510;Q13510-2	0	0	0	0	0	0	0	0	0	1	0
A0A1B0GTT2	0	0	0	0	0	0.46858	0	0.53142	0	0	0
A0A1B0GTU3;Q96L93;Q96L93-2;Q96L93-4;Q96L93-5;Q96L93-6	0	0	0.205503	0	0	0	0	0	0.390618	0	0.403879
A0A1B0GTU4
A0A1B0GTU5;H0Y488;O14497;O14497-2;O14497-3	0	1	0	0	0	0	0	0	0	0	0
A0A1B0GTU7;H0YD36;P54098	0	0	0	0	0	0	0	1	0	0	0
A0A1B0GTV6	0	0	0	0	0	0	0	1	0	0	0
A0A1B0GTW1;A0A2R8YDH4;A0A3B3ITE1;Q9UDY2;Q9UDY2-3;Q9UDY2-7	0	0	0	1	0	0	0	0	0	0	0
A0A1B0GTX1;A0A1C7CYY6;Q6XZF7;Q6XZF7-2	0	0	1	0	0	0	0	0	0	0	0
A0A1B0GU24;Q9HCJ0;Q9HCJ0-2	0	0.719408	0	0	0	0	0	0	0	0	0.280592
A0A1B0GUA3;A0A6Q8PGG2;A0A6Q8PH45;A0A6Q8PHL8;Q96EK5	1	0	0	0	0	0	0	0	0	0	0
A0A1B0GUC2;A0A1W2PP33;C9J7I0	0	0	0	0	0	0	0	0	1	0	0
A0A1B0GUF4	0	0	1	0	0	0	0	0	0	0	0
A0A1B0GUG6;Q86WH2	0	0	0.522049	0	0	0	0	0	0.477951	0	0
A0A1B0GUL3	0	0	0.562595	0	0	0	0	0	0.437405	0	0
A0A1B0GUL6;E9PEZ5;Q9UPP5;Q9UPP5-2
A0A1B0GUN5	0	0.444291	0.555709	0	0	0	0	0	0	0	0
A0A1B0GUN9	0	0	0	0	0	0	0	0	0	1	0
A0A1B0GUS7	0	0	0.426058	0.573942	0	0	0	0	0	0	0
A0A1B0GUZ2;P00797;P00797-2	0	0	1	0	0	0	0	0	0	0	0
A0A1B0GUZ7;Q14156;Q14156-2	0	0	0	0	0.588043	0	0	0	0	0	0.411957
A0A1B0GV26;Q8WWZ3;Q8WWZ3-2	0	0	1	0	0	0	0	0	0	0	0
A0A1B0GV47;Q7Z4S6;Q7Z4S6-2;Q7Z4S6-4;Q7Z4S6-5;Q7Z4S6-6	1	0	0	0	0	0	0	0	0	0	0
A0A1B0GV48;D6RBC4;Q8NAP3	0	0	0	0	0	0	0	0	0.519811	0	0.480189
A0A1B0GV57;Q9NYJ8	1	0	0	0	0	0	0	0	0	0	0
A0A1B0GV71;A0A1B0GW34;A0A1B0GWD3;B4DFF3;H3BNK7;H3BR00;O95086;Q13286;Q13286-2;Q13286-3;Q13286-4;Q13286-5;Q13286-7;Q2TA70;Q9UBD8	0	0	0	0	0	0.328025	0	0	0.671975	0	0
A0A1B0GVD5;A0A1B0GVP3;A0A1B0GW44;A0A1B0GWE8;P07339	0	0	0	0	0	0	0	0	0	1	0
A0A1B0GVG4
A0A1B0GVI7;A0A2R8Y7G1;P35869	0	0	0	0	0	0	1	0	0	0	0
A0A1B0GVL3;Q05086;Q05086-2;Q05086-3	1	0	0	0	0	0	0	0	0	0	0
A0A1B0GVV3;Q5EBL4	0	0	0	0	0	0	1	0	0	0	0
A0A1B0GVV8
A0A1B0GW05	0	0	0	0	0.5628	0	0	0.4372	0	0	0
A0A1B0GW23;Q03154	0	0	0	0	0	0	1	0	0	0	0
A0A1B0GW38
A0A1B0GW41;E9PEN0;Q8WYH8;Q8WYH8-2	0	1	0	0	0	0	0	0	0	0	0
A0A1B0GWB2	0	0.402911	0.164962	0	0	0	0	0	0	0	0.432127
A0A1B0GWD8;Q9C093-4	0	0	1	0	0	0	0	0	0	0	0
A0A1B0GWI2;O75503	0	1	0	0	0	0	0	0	0	0	0
A0A1B0GXA9;C9JHJ7;Q04771	0	0	0.483702	0.516298	0	0	0	0	0	0	0
A0A1B1UZQ1;A0A3B3IRU7;A0A3B3ISJ6;A0A3F2YP58;A0A5F9ZHF9;A0A5F9ZI67;Q9Y233;Q9Y233-2	0	0	0.521147	0.478853	0	0	0	0	0	0	0
A0A1C7CYW7	0	0	0.45621	0	0	0	0	0	0.54379	0	0
A0A1C7CYX0	0	0	0	0	0.564328	0	0	0	0	0	0.435672
A0A1C7CYX8	0	0	0	0	0	0	1	0	0	0	0
A0A1C7CYX9	0	0	0	0	0	0	1	0	0	0	0
A0A1C7CYY4;I3L1K6;I3L532;P12829
A0A1D5RMN4;P23945;P23945-2;P23945-4	0	0.429648	0	0	0	0	0	0	0	0	0.570352
A0A1P0AYU5;Q9BWM7	0	0	0	0	0	0	0	1	0	0	0
A0A1W2PNF0;A0A1W2PNY6;A0A1W2PPE6;A0A1W2PPG9;A0A1W2PPH4;A0A1W2PQ13;A0A1W2PQ60;A0A1W2PQD6;A0A1W2PQH2;A0A1W2PQL8;A0A1W2PR66;A0A1W2PRN3;A0A1W2PRT7;A0A1W2PS45;A0A1W2PS77;A0A1W2PSA9;A0A1W2PSD1;Q9Y2D2;Q9Y2D2-2;Q9Y2D2-3	0	0	0	0	0.546769	0	0	0.453231	0	0	0
A0A1W2PNH8;A0A1W2PNQ8;A0A1W2PNR0;A0A1W2PNW5;A0A1W2PPB6;A0A1W2PPR7;A0A1W2PQA9;A0A1W2PQP4;A0A1W2PQZ1;A0A1W2PS19;K7ELE1;K7EPJ2;O95427	0	0	0	0.542629	0	0	0	0	0	0	0.457371
A0A1W2PNP0;Q969N2;Q969N2-5	0	0	0	0	0.770705	0	0	0	0	0	0.229295
A0A1W2PNR9;Q9Y5U9	0	0	0	0	0	0	0	0	0.514261	0	0.485739
A0A1W2PNT1	0.382182	0	0	0	0	0.22493	0	0	0.392888	0	0
A0A1W2PNU4;A0A286YES2;F8VYC4;P0DJD0;P0DJD1	0	0.501765	0	0	0	0	0	0.498235	0	0	0
A0A1W2PNV4	0	0	0	0	0	0	1	0	0	0	0
A0A1W2PNW1;A0A494C0T4;H0YJH6;P42226;P42226-3	0	0	0	0	0	0	1	0	0	0	0
A0A1W2PNX8;Q9H3U1;Q9H3U1-2	0	0	0	0	0	0	1	0	0	0	0
A0A1W2PNY5;A0A1W2PPP6;A0A1W2PQA7;A0A1W2PQZ6;A0A1W2PR08;A0A1W2PRF0;A0A1W2PRF5;A0A1W2PRJ0;A0A1W2PS93;A0A1X7SBS0;G5E9D4;Q96EB1;Q96EB1-2;Q96EB1-3	0	0	0.366479	0	0	0	0	0	0.633521	0	0
A0A1W2PNZ9;H7BXU7;Q15652;Q15652-3	0	0	0.409064	0.590936	0	0	0	0	0	0	0
A0A1W2PP04;Q5JY83;Q9Y388	0	0.625999	0	0	0	0	0	0	0	0	0.374001
A0A1W2PP11;Q9H300	0	0	0	0.370219	0	0	0	0.629781	0	0	0
A0A1W2PPB7;E9PH70;H0Y8E4;Q9ULH0;Q9ULH0-2;Q9ULH0-4	0	0	0	0	0.603506	0	0	0	0	0	0.396494
A0A1W2PPC6;Q9H3H5;Q9H3H5-2	0	0	0	0	1	0	0	0	0	0	0
A0A1W2PPD8	0	0	1	0	0	0	0	0	0	0	0
A0A1W2PPH1;P23368	0	0	0	0	0	0	0	1	0	0	0
A0A1W2PPH6	0	0.206976	0	0	0	0	0	0.793024	0	0	0
A0A1W2PPI5;Q5JSJ4	0	0	0	0	0	0	0	0	0.587416	0	0.412584
A0A1W2PPJ5;J3QT51;J3QT87;Q96SW2;Q96SW2-2	0.723293	0	0	0	0	0.276707	0	0	0	0	0
A0A1W2PPS1;Q00839;Q00839-2	0	1	0	0	0	0	0	0	0	0	0
A0A1W2PPT3;P52740;P52740-2	0	0	0	0.414714	0	0	0	0.585286	0	0	0
A0A1W2PPV0;A0A1W2PQG5;Q9Y5P2;Q9Y5P2-2	0	0	0.329615	0	0	0	0	0	0.670385	0	0
A0A1W2PPZ5;P23193	0	0	0	0	0	0	1	0	0	0	0
A0A1W2PQ75;O15488;O15488-2;O15488-3;O15488-4;O15488-6	0	1	0	0	0	0	0	0	0	0	0
A0A1W2PQD2;Q9UBB4	0	0	0	0	0	0	1	0	0	0	0
A0A1W2PQE7	0	0	0.193732	0.428973	0	0	0	0	0	0	0.377294
A0A1W2PQM2	0	0	1	0	0	0	0	0	0	0	0
A0A1W2PQM3	0	0	0	0	0.455214	0	0	0	0.281975	0.262812	0
A0A1W2PQM5;A0A1W2PR19;A0A1W2PRG0	0	0	0	0	0	0	0	0	1	0	0
A0A1W2PQN4	0	0	0	0	0	0	0	0	0.618616	0	0.381384
A0A1W2PQP6;Q9BWL3;Q9BWL3-2;Q9BWL3-3;Q9BWL3-4;Q9BWL3-5;X6R6F3;X6R6S3	0	0	0	0	0	0	0	0	0	0	1
A0A1W2PQQ5	0	0	0.374841	0	0	0	0	0.334502	0	0	0.290658
A0A1W2PQS6	0	0	0	0.302985	0.378195	0	0	0.31882	0	0	0
A0A1W2PR09;A0A1W2PRL5;A0A1W2PRM0;F5GYH1;Q8NC96
A0A1W2PR17;F2Z2I2;Q16875;Q16875-2;Q16875-3;Q16875-4;Q5VX20;Q5W015	0.340964	0	0	0	0	0	0.659036	0	0	0	0
A0A1W2PR28;A0A1W2PRJ5;A0A6Q8PFR7;Q5JU85;Q5JU85-3	0.729479	0	0	0	0	0.270521	0	0	0	0	0
A0A1W2PR41;Q9Y6Q6;Q9Y6Q6-2;Q9Y6Q6-3;Q9Y6Q6-4;Q9Y6Q6-5	0	0	0.296923	0.401061	0	0	0	0	0	0	0.302016
A0A1W2PR46;A0A1X7SBR3;P14136;P14136-2;P14136-3	0	0.28695	0	0	0	0	0	0.292907	0	0	0.420144
A0A1W2PRB8	0	1	0	0	0	0	0	0	0	0	0
A0A1W2PRI9;E9PNW5	0	0	0.203368	0	0.554442	0	0	0	0.24219	0	0
A0A1W2PRV5;E7EQZ4;Q16637;Q16637-2;Q16637-3;Q16637-4	0	0	0	0	0.462963	0	0	0	0.277393	0	0.259644
A0A1W2PRW4;P53816
A0A1W2PS05;Q8NEB9	0.705986	0	0	0	0	0.294014	0	0	0	0	0
A0A1W2PS43;Q14108	0	0	0	0	0	0	0	0	0	1	0
A0A1W2PS52	0	0	0.600535	0	0	0	0	0	0	0.399465	0
A0A1W2PS94;A0A2R8Y358;Q9BXT5	0.619901	0	0	0	0	0.380099	0	0	0	0	0
A0A1X7SBT1;Q9H1D0;Q9H1D0-2	0	0.392025	0	0	0	0	0	0.607975	0	0	0
A0A1X7SBT7;O95502	0	0	0.264653	0	0	0	0	0	0.735347	0	0
A0A1X7SBY3;H0Y860;Q9P246;Q9P246-2	0	0.299789	0	0	0	0	0	0	0.347228	0	0.352983
A0A1X7SBZ2;A0A5H1ZRQ2;Q92841	0	0.512142	0	0	0.487858	0	0	0	0	0	0
A0A1Y0BRN3;A0A590UJ40
A0A286YEV4;A0A286YEV9;A0A286YEW8;A0A286YEX1;A0A286YF00;A0A286YF45;A0A286YF51;A0A286YF73;A0A286YFC6;A0A286YFE7;A0A286YFF5;A0A286YFH9;A0A286YFM2;B7Z2B2;E7ERQ4;Q8NHS3	0	0	0	0	0	0.288356	0	0	0.711644	0	0
A0A286YEX4;P08651;P08651-5;P08651-6	0	1	0	0	0	0	0	0	0	0	0
A0A286YF17;A0A286YFD0;P42898;P42898-2;Q5SNW7	0	0	0	0	0	0	1	0	0	0	0
A0A286YF22;O43175	0	0	0	0	0	0	1	0	0	0	0
A0A286YF37;Q9UK22	0	0	0	0	0	0	1	0	0	0	0
A0A286YF93	0	0	0.348005	0	0	0	0	0.651995	0	0	0
A0A286YFA5;Q8NGQ1	0	0	0.348685	0	0	0	0	0	0	0	0.651315
A0A286YFE3;A0A286YFF7;A0A286YFL8;A0A2C9F2P4;P50897;Q5T0S4	0	0	0	0	0	0	0	0	0	1	0
A0A286YFF8;Q7Z3U7;Q7Z3U7-2;Q7Z3U7-5;Q7Z3U7-6	0.35569	0	0	0	0	0	0.64431	0	0	0	0
A0A2Q2TTZ9;P01593;P01594	0	0.73742	0	0	0	0	0	0	0	0	0.26258
A0A2Q3DQE3;Q13555;Q13555-10;Q13555-11;Q13555-2;Q13555-3;Q13555-4;Q13555-5;Q13555-6;Q13555-7;Q13555-8;Q13555-9;Q5SWX3;Q8WU40	0	1	0	0	0	0	0	0	0	0	0
A0A2R8Y2A8
A0A2R8Y2F6;P42336	0	0	0	0.566367	0	0	0	0.433633	0	0	0
A0A2R8Y3M9	0	0	0	0	0.677023	0	0	0	0	0.322977	0
A0A2R8Y3N3;A0A2R8Y5P7;A0A2R8Y6I1;P49590;P49590-2	0	0	0	0	0	0	0	1	0	0	0
A0A2R8Y3S0;A0A2R8Y511;A0A2R8YCL0;Q96JX3	0	0.383883	0	0	0	0	0	0.616117	0	0	0
A0A2R8Y440;A0A2R8Y4P4;A0A2R8Y7S2;A0A2R8YG32;A0A2R8YGG3;P51532;P51532-2;P51532-3;P51532-4;P51532-5;Q9HBD4	0	1	0	0	0	0	0	0	0	0	0
A0A2R8Y455;A0A2R8Y600;A0A2R8Y620;A0A2R8Y7U2;Q86VX2;Q86VX2-2	0	0	0	0	0	0.536081	0	0	0.463919	0	0
A0A2R8Y471;Q12967;Q12967-2;Q12967-3;Q12967-4;Q12967-5;Q12967-6;Q5T7U6	0	0	0	0	0	0	0	1	0	0	0
A0A2R8Y478;A6NNI4;G8JLH6;P21926	0	0	0	0	0	0	0	0	1	0	0
A0A2R8Y484;Q08722;Q08722-2;Q08722-3;Q08722-4	0	0	0	0	0.479964	0	0	0	0.20918	0	0.310856
A0A2R8Y491;E7EWD9;O95718;O95718-1;O95718-2	0	1	0	0	0	0	0	0	0	0	0
A0A2R8Y4C2;A0A2R8Y596;A0A2R8Y5C9;A0A2R8Y5E4;A0A2R8Y6M6;A0A2R8Y8C4;A0A2R8YFK2;A0A2R8YFS8;P56945;P56945-2;P56945-3;P56945-4;P56945-5;P56945-6;P56945-7;P56945-8	0	0	0	0	0	0	1	0	0	0	0
A0A2R8Y4F5	0	0	1	0	0	0	0	0	0	0	0
A0A2R8Y4I8;A0A2R8Y7K2;A0A2U3TZR0;Q9UBP0;Q9UBP0-2;Q9UBP0-3;Q9UBP0-4
A0A2R8Y4K2;Q9Y2S2	0	0	0	0	0	0	1	0	0	0	0
A0A2R8Y4M1;A0A2R8Y615;A0A2R8YGW2;A0A5F9ZHK1;Q9NZA1;Q9NZA1-2;Q9NZA1-3	0	0	0.16399	0	0.369978	0	0	0	0	0	0.466033
A0A2R8Y4T1	0	0.357857	0	0.642143	0	0	0	0	0	0	0
A0A2R8Y4U1;A0A2R8YDF7;O75164	0	1	0	0	0	0	0	0	0	0	0
A0A2R8Y4U4	0	0.286939	0	0	0	0	0	0	0.311723	0	0.401338
A0A2R8Y4V0;A0A2R8Y4Z4;A0A2R8Y5D8;A0A2R8Y6Q0;A0A2R8YDG0;Q09428;Q09428-2	0	0	0	0.671594	0	0	0	0	0	0	0.328406
A0A2R8Y4W0	0	0	0	0.300591	0	0	0	0.366261	0	0	0.333148
A0A2R8Y4W1;A0A2R8Y860;A0A2R8YD46;A0A2R8YFE3;A0A2U3TZS7;P43004;P43004-2	0	0	0	0.249199	0.431265	0	0	0	0	0	0.319535
A0A2R8Y4W2;A0A2R8YE63;Q12929	0	1	0	0	0	0	0	0	0	0	0
A0A2R8Y4Y7;A0A2R8YFW4;Q9UQ90	0	0	0	0	0	0	0	1	0	0	0
A0A2R8Y4Z0;A0A2R8Y7W5;A0A2R8YF61;Q14004;Q14004-2	0	0	0	0	0	0	1	0	0	0	0
A0A2R8Y4Z6;J3KMZ7;Q9H0H0	1	0	0	0	0	0	0	0	0	0	0
A0A2R8Y4Z8	0	0.495682	0	0	0	0	0	0	0	0.504318	0
A0A2R8Y524;A0A2R8YEC9;E9PFW2;O00462	0	0.399903	0	0	0	0	0	0	0	0.600097	0
A0A2R8Y543;A0A2R8Y5A3;A0A2R8Y804;A0A2R8YCH5;B4DGU4;P35222	0	0.42935	0	0	0	0	0	0	0	0	0.57065
A0A2R8Y544;Q9BR61	0	0	0	0	0	0	1	0	0	0	0
A0A2R8Y549;Q8NI35;Q8NI35-2;Q8NI35-3;Q8NI35-4
A0A2R8Y566;Q9P260-2	0	0	0	0	0	0	1	0	0	0	0
A0A2R8Y595;A0A2R8YFL0;P49711	0	1	0	0	0	0	0	0	0	0	0
A0A2R8Y5A0;A0A2R8YD58;E7EU96;P68400	0	1	0	0	0	0	0	0	0	0	0
A0A2R8Y5D3;A0A2R8YEZ4;O15160;O15160-2	0	1	0	0	0	0	0	0	0	0	0
A0A2R8Y5F1;A0A2R8Y7C8;A0A2R8Y7X5;A0A2R8YDR3;A0A2R8YDZ2;A0A2R8YGD6;A0A2R8YGU4;H3BMQ0;P49815;P49815-2;P49815-3;P49815-4;P49815-5;P49815-6;P49815-7;X5D2U8
A0A2R8Y5J4;Q9BYG8	0	0.348917	0	0	0	0.320445	0	0	0.330639	0	0
A0A2R8Y5K2;Q96LT7	0	0	0	0	0	0	0	0	0	1	0
A0A2R8Y5N2;A0A2R8Y5S3;A0A2R8YFV7;Q92574;Q92574-2	0	1	0	0	0	0	0	0	0	0	0
A0A2R8Y5P9;Q8TF72	0	0.37616	0.62384	0	0	0	0	0	0	0	0
A0A2R8Y5Q8;A0A2R8YHI9;Q15813;Q15813-2
A0A2R8Y5Y7;D6RAN4;P32969	0	0	0	0	0.60591	0	0	0.39409	0	0	0
A0A2R8Y605	0	0	0	0	0	0	0	0	1	0	0
A0A2R8Y635;A0A2R8YDN7;Q9H7F0;Q9H7F0-2	0	0.271829	0.190243	0	0	0	0	0	0.537929	0	0
A0A2R8Y640	0	1	0	0	0	0	0	0	0	0	0
A0A2R8Y648	0	0	0	0	0	0	1	0	0	0	0
A0A2R8Y651;Q8TF64	1	0	0	0	0	0	0	0	0	0	0
A0A2R8Y653;Q9BZX2	0	0	0	0	0	0	1	0	0	0	0
A0A2R8Y661;A0A2R8YGD3;Q9Y4G8
A0A2R8Y6D0	0	0	0	0.314789	0	0	0	0	0	0	0.685211
A0A2R8Y6I6;A0A2R8Y6L5;A0A2R8YDF3;Q13627;Q13627-2;Q13627-3;Q13627-4;Q13627-5	1	0	0	0	0	0	0	0	0	0	0
A0A2R8Y6P2;A0A2R8YDC4;A6NFE3;C9J654;J3KR48;J3KR52	0.621459	0	0	0	0	0	0	0	0.378541	0	0
A0A2R8Y6W8;P19447	0	0.684293	0	0	0	0	0	0	0	0	0.315707
A0A2R8Y6Y7;A0A2R8YDQ9;Q9P2R7;Q9P2R7-2	0	0	0	0	0	0	0	1	0	0	0
A0A2R8Y783	0	0	0.446211	0	0	0	0	0	0	0	0.553789
A0A2R8Y7B4	0.641836	0	0	0	0	0	0	0	0.358164	0	0
A0A2R8Y7D5	0	0.26237	0.163203	0	0	0	0	0.574427	0	0	0
A0A2R8Y7E6;A0A5F9ZHX3;A0A5F9ZI57	0	0	0	0	0.548541	0	0	0	0	0	0.451459
A0A2R8Y7I9;A0A2R8Y855;A0A2U3TZQ7;B4DGM3;J3QKS7;Q969G3;Q969G3-2;Q969G3-4;Q969G3-5	0	1	0	0	0	0	0	0	0	0	0
A0A2R8Y7J6;A0A2R8YD89;A0A2R8YEZ2;H3BNF9;H3BS01;Q9Y2V0;Q9Y2V0-2	0	0	0	0	0	0.297939	0	0	0.375954	0.326107	0
A0A2R8Y7P6;A0A5F9ZHW5;F8VQP2;Q99700;Q99700-4;V9GY86	0	0	0	1	0	0	0	0	0	0	0
A0A2R8Y7Q1;E7ETD6;E9PE19;F5GXF5;Q12830;Q12830-2;Q12830-4	0	1	0	0	0	0	0	0	0	0	0
A0A2R8Y7Q6;Q04864;Q04864-2	1	0	0	0	0	0	0	0	0	0	0
A0A2R8Y7R4;B2RUZ4;H3BS66	0	0.442762	0	0	0	0	0	0	0	0.557238	0
A0A2R8Y7T6;A0A3B3IRZ4;Q6DN90;Q6DN90-3	0	0	0	0	0	0	1	0	0	0	0
A0A2R8Y7U0;H0Y770;O75140;O75140-1;O75140-4;O75140-9
A0A2R8Y7V5;H0Y850;P38398;P38398-4;P38398-7;P38398-8;Q5YLB2	0	0	0.416025	0	0	0	0	0	0	0	0.583975
A0A2R8Y7X9;P69891;P69892	0	0	0.374372	0	0	0	0	0	0.304675	0	0.320953
A0A2R8Y7Y4;Q8N8A2;Q8N8A2-2;Q8N8A2-4	0.487774	0	0	0	0	0	0.512226	0	0	0	0
A0A2R8Y811;P62263	0	0	0	0.398047	0.601953	0	0	0	0	0	0
A0A2R8Y840;Q9HCK8;Q9HCK8-2	0	1	0	0	0	0	0	0	0	0	0
A0A2R8Y849;A0A2R8Y8A0;A0A2R8YD14;E7ETK0;P62847;P62847-2;P62847-3;P62847-4	0	0	0	0.374574	0.356976	0	0	0.26845	0	0	0
A0A2R8Y851;P62273;P62273-2	0	0	0	0	0.44944	0	0	0.55056	0	0	0
A0A2R8Y852;A0A2R8YDI1;P39880;P39880-2;P39880-3;P39880-4;P39880-5;P39880-6	0	0	0	0	0	0	0	0	1	0	0
A0A2R8Y880;Q7Z6E9;Q7Z6E9-2	0	0.482127	0	0	0	0	0	0	0.228012	0	0.289861
A0A2R8Y8E0;A0A2U3TZI2;H7C560;P15056	0	0	0	0	0	0	1	0	0	0	0
A0A2R8YCJ8;Q5T2H3;Q9NVV5;Q9NVV5-1;Q9NVV5-3	0	0	0	0	1	0	0	0	0	0	0
A0A2R8YCL1;Q13322;Q13322-3;Q13322-4
A0A2R8YCS7;Q9Y3Z3	1	0	0	0	0	0	0	0	0	0	0
A0A2R8YD30;P11171;P11171-2;P11171-3;P11171-4;Q4VB86	0	0	0	1	0	0	0	0	0	0	0
A0A2R8YD63;Q92547
A0A2R8YD85;Q96BY6;Q96BY6-3	0	0	0	0	0	0	0	0	1	0	0
A0A2R8YDB8;H7BXF5;Q9H0E3;Q9H0E3-3	0	1	0	0	0	0	0	0	0	0	0
A0A2R8YDC7;A0A2R8YE40;A0A2R8YF99;A0A2R8YFQ8;A0A2R8YGK2;F8W7S1;Q8NAN2;Q8NAN2-2	0	0	0.45148	0	0	0	0	0	0.54852	0	0
A0A2R8YDD5;P30531	0	0	0	0	0.60518	0	0	0	0	0	0.39482
A0A2R8YDI5;O94823;O94823-2;O94823-3	0	0	0.18305	0	0	0	0	0.81695	0	0	0
A0A2R8YDL0;O75443
A0A2R8YDQ0;Q9H267
A0A2R8YDR8;Q9BZD2;Q9BZD2-2	0	0.337899	0	0	0	0.230617	0	0	0.431484	0	0
A0A2R8YDT1;P15104	0.419705	0	0	0	0	0	0.580295	0	0	0	0
A0A2R8YE10;Q9NRW7	0	0	0	0	0	0.354632	0	0	0.292042	0.353326	0
A0A2R8YE69;P0CG41;Q8IX94	0	0.42083	0.57917	0	0	0	0	0	0	0	0
A0A2R8YE77;A0A2U3TZM1;O14936;O14936-3	0	0	0	0.320768	0.37692	0	0	0	0	0	0.302312
A0A2R8YEA1;B5MCJ9;O15016;O15016-2	0	0	0	0	0	0	0	1	0	0	0
A0A2R8YEH1	0	0	1	0	0	0	0	0	0	0	0
A0A2R8YEI5;P52757;P52757-9	0.375572	0	0	0	0	0	0.624428	0	0	0	0
A0A2R8YEL6
A0A2R8YEM2;D6RG18;D6RHI7;P51946	0	0	0	0	0	0	0	0	0.671754	0	0.328246
A0A2R8YEM9;O15050	0	0	1	0	0	0	0	0	0	0	0
A0A2R8YEZ0;B7WP89;Q0P651;Q0P651-2;Q0P651-3;Q0P651-4	0	0	0	0	0	0	0	1	0	0	0
A0A2R8YF49
A0A2R8YF72;A0A3B3IRF0;A0A3B3IRT9;A0A3B3IRX5;A0A3B3ISI4;A0A3B3ISW5;A0A3B3ITJ8;A0A3B3ITL3;A0A3B3ITS6;A0A3B3IUE2;H7BYU4;Q9UL68;Q9UL68-4	0	0	0	0	0	0	0	1	0	0	0
A0A2R8YFF1;Q8N302	0	0	0	0	0	0.464634	0	0	0.535366	0	0
A0A2R8YFG2;Q96T66	0	0	0	0	0	0	0	1	0	0	0
A0A2R8YFH5;Q15437	0.661067	0	0	0	0	0.338933	0	0	0	0	0
A0A2R8YFL3	0.345619	0	0	0	0	0.225216	0	0	0.429164	0	0
A0A2R8YFN3;A1Z1Q3;A1Z1Q3-1	0	0	0.173387	0	0	0	0.826613	0	0	0	0
A0A2R8YFN7	0	0	0	0	0	0	0	0	0.652172	0.347828	0
A0A2R8YFW3;O60907;O60907-2	0	1	0	0	0	0	0	0	0	0	0
A0A2R8YFX0;Q969X2;Q969X2-2	0	0	0	0	0	0	0	0	1	0	0
A0A2R8YG42;B1ALK7;Q14155-1;Q14155-5	0.666946	0	0	0	0	0.333054	0	0	0	0	0
A0A2R8YGH5;H7C1E4;P61966	0	0	0	0	0	0	0	0	0.584969	0.415031	0
A0A2R8YGW0;P51795;P51795-1	0	0	0	0	0	0.270736	0	0	0.729264	0	0
A0A2R8YHG5;Q9BZV2	0	0	0	0	0	0	0	0	0.396206	0	0.603794
A0A2U3TZH3;Q05639	0	0.525584	0	0	0	0	0	0	0.474416	0	0
A0A2U3TZK7	0	0	0	0	0	0	0	1	0	0	0
A0A2U3TZL5;E9PNW4;P13987;P13987-2	0	0	0	0	0.419879	0	0	0	0	0.25993	0.320192
A0A2U3TZN6	0	0	0.391558	0	0	0	0	0	0	0	0.608442
A0A2U3TZT9	0	0	1	0	0	0	0	0	0	0	0
A0A2U3TZU2;P06744	0	0	0	0	0	0	1	0	0	0	0
A0A2U3TZV8;Q4KWH8;Q4KWH8-2;Q4KWH8-3;Q4KWH8-4	0	0	0	0	1	0	0	0	0	0	0
A0A2Y9D025;P56556;R4GN43	0	0	0	0	0	0	0	1	0	0	0
A0A384DVU0;Q8IY17;Q8IY17-2;Q8IY17-3	0	0	0.316506	0	0.683494	0	0	0	0	0	0
A0A3B3IQ51;P36980;P36980-2;V9GYE7	0	0	0	0	0	0	0	0	1	0	0
A0A3B3IRE4;Q8TCE6;Q8TCE6-2	0	0	0	0	0	0.219504	0	0	0.780496	0	0
A0A3B3IRI9;A0A3B3IRJ3;A0A3B3IRV1;A0A3B3IRZ0;A0A3B3IS37;A0A3B3IS68;A0A3B3ISJ4;A0A3B3IT04;A0A3B3IT30;A0A3B3ITZ3;A0A3B3IU52;A6NFW1;A6NGJ7;Q9BY41;Q9BY41-4	0.553562	0	0	0.446438	0	0	0	0	0	0	0
A0A3B3IRJ9;Q9Y2H2	0.647676	0	0	0	0	0.352324	0	0	0	0	0
A0A3B3IRK5;Q9H2D1	0	0.458973	0	0	0	0	0	0.309631	0.231396	0	0
A0A3B3IRL2;O75629	0	0	0	0	0	0	0	0	0	1	0
A0A3B3IRL5;C9J381;P20839;P20839-2;P20839-3;P20839-4;P20839-5;P20839-6;P20839-7	0.626767	0	0	0	0	0.373233	0	0	0	0	0
A0A3B3IRN8;A0A3B3ITX0;P24311	0	0	0	0	0	0	0	1	0	0	0
A0A3B3IRP9	0	0	0	0	0	0	0	0	1	0	0
A0A3B3IRQ5	0	0	1	0	0	0	0	0	0	0	0
A0A3B3IRQ7	0	0	0	0	0	0	0	1	0	0	0
A0A3B3IRR1;A0A3F2YNY7;P08397;P08397-2	0	0	0	0	0	0	1	0	0	0	0
A0A3B3IRS4;A0A3B3IRX3;A0A3B3IS46;H0YHC1;Q71F56	0	0	0.208694	0	0	0.260435	0	0	0.530871	0	0
A0A3B3IRT8;C9IZQ1;C9J3L8;C9J5W0;E9PAL7;P43307	0	0	0	0	0	0	0	1	0	0	0
A0A3B3IRU6;A0A3B3ISL2;Q9GZU2;Q9GZU2-2;Q9GZU2-4	0	0.66237	0	0	0	0	0	0	0.33763	0	0
A0A3B3IRY8	0	0	0	0.46086	0	0	0	0.292636	0	0	0.246504
A0A3B3IRZ5;Q8IYE1	0	0.340531	0	0	0	0	0	0.659469	0	0	0
A0A3B3IS06;E7ETY2;Q13428-3;Q13428-7;Q13428-8	0	1	0	0	0	0	0	0	0	0	0
A0A3B3IS13
A0A3B3IS24;C9JIR6;O75688;O75688-2;O75688-4	0	0.20244	0	0	0	0	0.79756	0	0	0	0
A0A3B3IS40;A0A3B3ISE6;A0A3B3IT25;A0A3B3ITA8;A0A3B3ITA9;A0A3B3ITE7;A0A3B3ITJ7;B3KV94;Q9UGL1;Q9UGL1-2	0	1	0	0	0	0	0	0	0	0	0
A0A3B3IS62;A0A3B3ITD6;A0A3B3ITI5;Q9Y672;S4R350	0	0	0	0	0.695977	0	0	0.304023	0	0	0
A0A3B3IS66	0	0	0	0.521503	0	0	0	0	0.478497	0	0
A0A3B3IS71;P06400	0	1	0	0	0	0	0	0	0	0	0
A0A3B3IS75;K7EIP0;K7EJD9;K7ESF2;P13686	0	0	0	0	1	0	0	0	0	0	0
A0A3B3ISA5	0	0	0.605681	0	0	0	0	0	0.394319	0	0
A0A3B3ISF0;Q659C4;Q659C4-2	0	0	0	0	1	0	0	0	0	0	0
A0A3B3ISF9;P42892;P42892-2;P42892-3;P42892-4	0	0	0	0	0	0	0	0	0	1	0
A0A3B3ISG5;P14735	0	0	0	0	0	0	1	0	0	0	0
A0A3B3ISG8	0	0	0	0	0	0	0	1	0	0	0
A0A3B3ISH6;Q86U38;Q86U38-2	0	1	0	0	0	0	0	0	0	0	0
A0A3B3ISJ2;Q96KQ4	0	0	0	1	0	0	0	0	0	0	0
A0A3B3ISK7;Q6PI48	0	0	0	0	0	0	0	1	0	0	0
A0A3B3ISP1;A0A3B3ITU5;Q92625;Q92625-2
A0A3B3ISQ4;Q9H6S3	0	0	0	0	0	0	1	0	0	0	0
A0A3B3ISR2;B4DPQ0;P00736
A0A3B3ISR7;E9PIF2;Q13206	0	1	0	0	0	0	0	0	0	0	0
A0A3B3ISS6	0	0	0	0	0	0	0	0	0	0	1
A0A3B3IST1;B5MD23;O75954	0	0	0	0	0.477577	0	0	0	0	0	0.522423
A0A3B3IST8;B9ZVM7;E7ENI6;E9PDL4;F8WBQ1;Q05084;Q05084-2;Q05084-3;Q6LCR0;Q8NDH6	1	0	0	0	0	0	0	0	0	0	0
A0A3B3ISU0;Q02487	0	0.284561	0	0	0	0	0	0	0	0	0.715439
A0A3B3ISV3;P02462	0	0.593905	0	0	0	0	0	0.406095	0	0	0
A0A3B3ISV4	0	0	0	0	1	0	0	0	0	0	0
A0A3B3ISV5;Q8N9N7
A0A3B3ISV8;A0A6Q8PF19;A0A6Q8PFS9;A0A6Q8PHH0;Q8IZF0	0	1	0	0	0	0	0	0	0	0	0
A0A3B3ISV9;O43414
A0A3B3IT21	0	0.726421	0	0	0	0	0	0	0	0	0.273579
A0A3B3IT28;A0A3B3ITE5;A0A3B3ITF7;A0A3B3ITW6;A0A3B3IU40;A0A3B3IUA1;A0A3F2YNW9;Q12756;Q12756-2;Q12756-3	0.629475	0	0	0	0	0	0	0.370525	0	0	0
A0A3B3IT31;Q9NUN5;Q9NUN5-3	0	0	0	0	0	0.294402	0	0	0.375777	0.329821	0
A0A3B3IT37;Q5SXQ3;Q5SXQ5;Q8IYK4	0	0	0.637813	0	0	0	0	0	0	0	0.362187
A0A3B3IT92;P33991
A0A3B3ITH3;Q9P2X3	0	0	0	0	0	0	1	0	0	0	0
A0A3B3ITJ4	0	0.702073	0	0	0	0	0	0	0	0	0.297927
A0A3B3ITK0;P35442	0	0	0	0	0	0	1	0	0	0	0
A0A3B3ITN0;Q86TP1	0	0	0	0	0	0	1	0	0	0	0
A0A3B3ITN6;D6RBB0;O60683;O60683-2	0	0	0	0.282227	0	0	0	0.453204	0	0	0.264569
A0A3B3ITP4;Q495G5;Q8IVH4	0	0	0	0	0	0	0	1	0	0	0
A0A3B3ITT1
A0A3B3ITT5;P47914	0	0	0	0	0.344942	0	0	0.655058	0	0	0
A0A3B3ITU8;A0A3B3IU04;A0A3F2YNW8;Q14643;Q14643-2;Q14643-3;Q14643-4;Q14643-5;Q14643-6;Q14643-7;Q14643-8	0	0	0	0	1	0	0	0	0	0	0
A0A3B3ITW1;P49841;P49841-2	0	0	0	0	0	0	1	0	0	0	0
A0A3B3IU24;Q92743	0	0	0	0	0	0	0	0	0.64299	0	0.35701
A0A3B3IU42;G5EA29;H0YDP6;H0YEL0;O14893;O14893-2;O14893-3	0	0	0	0	0	1	0	0	0	0	0
A0A3B3IU65;A9UHW6;A9UHW6-2;A9UHW6-3;J3KSU6;J3QLD1;J3QLJ5;J3QRZ6	0.693011	0	0	0	0	0.306989	0	0	0	0	0
A0A3B3IU69;F8W717;O00423;O00423-3	0.57579	0	0	0	0	0.42421	0	0	0	0	0
A0A3B3IUA2;B1AHD1;P55769	0	1	0	0	0	0	0	0	0	0	0
A0A3B3IUB1;Q13144	1	0	0	0	0	0	0	0	0	0	0
A0A3B3IUB5;Q8TCT9;Q8TCT9-5	0	0	0	0	1	0	0	0	0	0	0
A0A3B3IUC4;A0A6Q8PFA9;P06280	0	1	0	0	0	0	0	0	0	0	0
A0A3B3IUD2;Q9BUK6;Q9BUK6-2;Q9BUK6-3;Q9BUK6-7	0	0	0	0	0	0	1	0	0	0	0
A0A3B3IUD4;P21453	0	0	0.40927	0	0	0	0	0	0	0	0.59073
A0A3B3IUD7;Q14690	0	1	0	0	0	0	0	0	0	0	0
A0A494BWY4;Q6IEE7	0	0	0.387017	0	0	0	0	0	0	0	0.612983
A0A494BXY3;E9PLD3;E9PRG8	0	0.368429	0	0	0	0	0	0	0	0	0.631571
A0A494BZU6;A0A494BZW7;A0A494C002;A0A494C0P9;A0A494C0Q2;A0A494C0Q6;A0A494C0W0;A0A494C156;A0A494C1K5;A0A494C1N1;O95453;O95453-2	0.582942	0.417058	0	0	0	0	0	0	0	0	0
A0A494BZV4;A0A494C069;Q08AG5	0	0	0	0	0	0	0	1	0	0	0
A0A494BZZ6;P78549;P78549-2;P78549-3	0	1	0	0	0	0	0	0	0	0	0
A0A494C028;H0Y993;P35659	0	1	0	0	0	0	0	0	0	0	0
A0A494C039	0	0	0	0	0	0	0	0	0	0	1
A0A494C066;B7Z4W5;Q16773	0	0	0	0	0	0	1	0	0	0	0
A0A494C068;A0A494C1K7;E9PGP6;Q9UGJ0;Q9UGJ0-2;Q9UGJ0-3	0.660965	0	0	0	0	0.339035	0	0	0	0	0
A0A494C0C1	0	0	0	0	0	0	0	0	1	0	0
A0A494C0J7;Q08188	0	0.643478	0	0	0	0	0	0.356522	0	0	0
A0A494C0K7;A0A494C0P0;Q6P2C8;Q6P2C8-2	0	1	0	0	0	0	0	0	0	0	0
A0A494C0M1;P52701	0	1	0	0	0	0	0	0	0	0	0
A0A494C0M2;O95925-3;Q9BQY6;Q9BQY6-2	0	0	0.642211	0	0	0.357789	0	0	0	0	0
A0A494C0N4;H9KV93;Q7Z4L5	0	0	0	0	0	0	0	0	1	0	0
A0A494C0P1;P04150;P04150-10;P04150-2;P04150-3;P04150-6;P04150-8;P04150-9	0	0	0	0	0	0	1	0	0	0	0
A0A494C0Q3	0	0	0.453083	0	0	0	0	0	0.546917	0	0
A0A494C0R8	0.670643	0	0	0	0	0.329357	0	0	0	0	0
A0A494C0X7;D3DSM0;P05107	0	0	0	0	0.701324	0	0	0	0	0	0.298676
A0A494C0Z5;Q9H082	0	0.556415	0.443585	0	0	0	0	0	0	0	0
A0A494C100;Q9UJA2;Q9UJA2-2	0	0	0	0.362535	0	0	0	0.637465	0	0	0
A0A494C105;Q9H3U5;Q9H3U5-3;Q9H3U5-5;Q9H3U5-6	0	0	0	0	0	0.327764	0	0	0.32204	0.350196	0
A0A494C108;Q8N9T8	0	1	0	0	0	0	0	0	0	0	0
A0A494C115;A0A494C1U4;K7N7A8;P29972;P29972-2;P29972-3;P29972-4	0	0	0	0	0.680184	0	0	0	0	0	0.319816
A0A494C143;Q14689;Q14689-6	0	0	1	0	0	0	0	0	0	0	0
A0A494C146;P50336	0	0	0	0	0	0	0	1	0	0	0
A0A494C151;Q4UJ75;Q5CZ79;Q5CZ79-2;Q5SQ80;Q5TYW2;Q5VUR7	0	0.619861	0.380139	0	0	0	0	0	0	0	0
A0A494C164;P52630;P52630-4	0.39171	0	0	0	0	0	0.60829	0	0	0	0
A0A494C165;K7ES25;P12955	0	0	0	0	0	0	1	0	0	0	0
A0A494C167;Q9UHD2	1	0	0	0	0	0	0	0	0	0	0
A0A494C172	1	0	0	0	0	0	0	0	0	0	0
A0A494C193;Q08E93	0	0	0	0	0.59334	0	0	0	0	0	0.40666
A0A494C1C4;P78552;P78552-2	0	0	0	0	0	0	0	0	1	0	0
A0A494C1F2;P35658;P35658-2;P35658-3;P35658-4;P35658-5	0	1	0	0	0	0	0	0	0	0	0
A0A494C1J1;Q69YQ0;Q69YQ0-2	0	0.372457	0	0	0	0	0	0	0	0	0.627543
A0A494C1J8	0	1	0	0	0	0	0	0	0	0	0
A0A494C1L5;P50851-2	0.407686	0	0	0	0	0	0.592314	0	0	0	0
A0A494C1M4;Q3SY69	1	0	0	0	0	0	0	0	0	0	0
A0A494C1N0;P26885	0	0	0	0	1	0	0	0	0	0	0
A0A494C1S7;Q9Y5Q9	0	1	0	0	0	0	0	0	0	0	0
A0A494C1T9;Q6ZRV2	0	1	0	0	0	0	0	0	0	0	0
A0A494C1V1;Q6ZNJ1;Q6ZNJ1-2;Q6ZNJ1-3	1	0	0	0	0	0	0	0	0	0	0
A0A499FI31;Q15020;Q15020-4	0.681201	0.318799	0	0	0	0	0	0	0	0	0
A0A499FI48;P13667	0	0	0	0	0.758651	0	0	0	0	0	0.241349
A0A499FIS5;A0A499FJN1;A0A499FJS1;Q9BUB5;Q9BUB5-2;Q9BUB5-3	0	0	0	0	0	0.369556	0	0	0.630444	0	0
A0A499FIX8;A0FGR8-2;H7BXI1	0	0	0	0	1	0	0	0	0	0	0
A0A499FIY8;C9JC07;C9JZL8;Q96S97	0	0	0	0	0	0	0	0	0	0	1
A0A499FIZ0	1	0	0	0	0	0	0	0	0	0	0
A0A499FJ41;K7ES72;Q13938;Q13938-3;Q13938-4	0	0	0	0.340798	0	0	0.659202	0	0	0	0
A0A499FJI4;O75592;O75592-2	0	0	1	0	0	0	0	0	0	0	0
A0A499FJM4;P08684	0	0	0	0	1	0	0	0	0	0	0
A0A4V7I447;Q0VD83;Q0VD83-2	0	0	0.25141	0	0	0	0	0	0	0.25618	0.492409
A0A4W8VYG7;A0A4W8W4R1;Q99674	0	0	0.48004	0	0	0	0	0	0	0.51996	0
A0A539;A0A589	0.686792	0	0.313208	0	0	0	0	0	0	0	0
A0A590PXD8;Q53SF7-3	0	0	0	0	0	0	1	0	0	0	0
A0A590UIU4;A0A590UJ09;A0A590UJ61;A0A590UJC8;A0A590UJF4;A0A590UJG1;A0A590UJH1;A0A590UJS0;A0A590UJT1;A0A590UK11;A0A590UK42;A0A590UK98;Q5VZ66
A0A590UJ36;A6NDB9	0	0	0	1	0	0	0	0	0	0	0
A0A590UJ43;P48729;P48729-3;U3KPX3	0	1	0	0	0	0	0	0	0	0	0
A0A590UJ46
A0A590UJ50;A0A590UJR3;Q13616	1	0	0	0	0	0	0	0	0	0	0
A0A590UJ62;E7ETH1;Q14003	0	0	0	0	0	1	0	0	0	0	0
A0A590UJ68;A0A590UJR5;A0A590UJS9;A0A590UKA8;Q12959;Q12959-3;Q12959-5;Q12959-6;Q12959-7	0	0	0	0.325324	0.376604	0	0	0	0	0	0.298072
A0A590UJ73;A0A590UJW4;E7EQB3;Q9BSV6	0	0	0	0	0	0	1	0	0	0	0
A0A590UJA9;C9JCW7;C9JE12;Q9BVT8	0	0	0	0	0.752447	0	0	0	0	0	0.247553
A0A590UJB6
A0A590UJC7;A0A590UK51;O60733;O60733-2	0	0	1	0	0	0	0	0	0	0	0
A0A590UJF0;P63092-3	0	0	0	0.426905	0.573095	0	0	0	0	0	0
A0A590UJG2;Q9UPN3-2;Q9UPN3-3
A0A590UJK3;Q14BN4;Q14BN4-2;Q14BN4-3	0	0	0	0	1	0	0	0	0	0	0
A0A590UJK4;A0A590UJP7;A0A590UK01;A0A590UK80;Q13247;Q13247-3	0	1	0	0	0	0	0	0	0	0	0
A0A590UJL0;P08842	0	0	0	0	0	0	1	0	0	0	0
A0A590UJN0;E7ETK1;E9PBA8;Q52LR7;Q9H2F5;Q9H2F5-2	0	1	0	0	0	0	0	0	0	0	0
A0A590UJS8;A0A5F9ZA98;B4DGL8;O75027;O75027-2	0	0	0	0	0	0	0	1	0	0	0
A0A590UJW0;A0A590UKC9;P20585	0	1	0	0	0	0	0	0	0	0	0
A0A590UJW8;Q96J02;Q96J02-2	0	1	0	0	0	0	0	0	0	0	0
A0A590UJY5	0	0	0.549654	0	0	0.450346	0	0	0	0	0
A0A590UK09;A0A590UK73;B1AKN5;B1AKN7;B1AKN8;Q12857;Q12857-2;Q12857-4	0	1	0	0	0	0	0	0	0	0	0
A0A590UK87	0	0	0	0	0	0	0	0	1	0	0
A0A590UKC3;Q9UF12	0	0	0	0	0	0	0	1	0	0	0
A0A5E8;Q99501;Q99501-2;Q99501-3;Q99501-4	0	0.347898	0	0	0	0	0	0.652102	0	0	0
A0A5F9UK94;H0Y360;Q01433;Q01433-2	0.329897	0	0	0	0	0	0.670103	0	0	0	0
A0A5F9UP49;Q9BRK5	0	0	0	0	0	0	0	0	0.723817	0.276183	0
A0A5F9UY30;A0A5H1ZRP2;O43493;O43493-3;O43493-5;O43493-7	0	0	0	0	0	0	0	0	0.594783	0.405217	0
A0A5F9YFS9;C9JBL1;Q9Y6A9	0	0	0	0	0.68889	0	0	0.31111	0	0	0
A0A5F9YLF9	0	0.412272	0.587728	0	0	0	0	0	0	0	0
A0A5F9ZGN6	0	0	0	0	1	0	0	0	0	0	0
A0A5F9ZGW5;C9J8U3;Q7Z2E3-13;Q7Z2E3-5;Q7Z2E3-7;Q7Z2E3-9	0	1	0	0	0	0	0	0	0	0	0
A0A5F9ZGX0	0	0	0	0	0	0	0	0	1	0	0
A0A5F9ZGX3;A0A5F9ZGY3;A0A5F9ZGY4;A0A5F9ZGZ5;A0A5F9ZH19;A0A5F9ZH30;A0A5F9ZHD2;A0A5F9ZHE4;A0A5F9ZHN5;A0A5F9ZHR8;A0A5F9ZHS1;A0A5F9ZI30;A0A5F9ZI40;A0A5F9ZI65;D6RHE1;I6L894;Q01484	0	0	0	0.388217	0	0	0	0.611783	0	0	0
A0A5F9ZGY7	0	0	0	0	0	0	1	0	0	0	0
A0A5F9ZH13;E9PR06;Q9NQC8;Q9NQC8-2	0	0.60036	0	0	0	0	0	0	0.39964	0	0
A0A5F9ZH20;A0A5F9ZH60;A0A5F9ZH84;Q5TF39
A0A5F9ZH43;A0A5F9ZHW6;A4UGR9-4;A4UGR9-5;A4UGR9-6;A4UGR9-7	0	0.673055	0	0	0	0	0	0	0	0	0.326945
A0A5F9ZH85	0	0.515283	0	0	0	0	0	0	0.484717	0	0
A0A5F9ZH93;A0A5F9ZHX9;Q9UHN1	0	0	0	0	0	0	0	1	0	0	0
A0A5F9ZHE0;C9JQD1;P35557	0	0	0	0	0	0	1	0	0	0	0
A0A5F9ZHH6;P19793;P19793-2	0	1	0	0	0	0	0	0	0	0	0
A0A5F9ZHJ0	0	0	0	0	0	0	0	1	0	0	0
A0A5F9ZHM4;P07195	0	0	0	0	0	0	1	0	0	0	0
A0A5F9ZHN2;E7EWD6;Q76L83;Q76L83-2	0	1	0	0	0	0	0	0	0	0	0
A0A5F9ZHN7;Q9NTJ5	0	0	0	0	1	0	0	0	0	0	0
A0A5F9ZHN9;P51648;P51648-2	0	0	0	0	1	0	0	0	0	0	0
A0A5F9ZHP1;Q8N9N2-2	0	0	0	0	1	0	0	0	0	0	0
A0A5F9ZHQ6;A0A6I8PIF8;A0A6I8PIP2;A0A6I8PU78;O75071;S4R3Q1	1	0	0	0	0	0	0	0	0	0	0
A0A5F9ZHX8;A0A5F9ZHZ5;F5GYY5;F5H324;P51690	0	0	0	0	1	0	0	0	0	0	0
A0A5F9ZI21;Q92974;Q92974-2;Q92974-3;V9GYF0;V9GYM8	0	0	0	0	0	0	0	0	0	0.42714	0.57286
A0A5F9ZI33	0	0	0	0	0.513619	0	0	0	0.227161	0	0.25922
A0A5F9ZI63;O75530;O75530-2;O75530-3	0	0.654999	0	0	0	0	0	0	0.345001	0	0
A0A5F9ZI76;Q32ZL2;Q32ZL2-2	0	1	0	0	0	0	0	0	0	0	0
A0A5H1ZRP4;Q8WX92;Q8WX92-2	0	1	0	0	0	0	0	0	0	0	0
A0A5H1ZRR2;G9CGD6;G9CGD6-2;G9CGD6-3;Q6P9H4	0	0	0.525403	0	0	0	0	0	0	0	0.474597
A0A5H1ZRS1	0	1	0	0	0	0	0	0	0	0	0
A0A5K1VW60;Q99766	0	0	0	0	0	0	0	1	0	0	0
A0A5K1VW66;P35240;P35240-2;P35240-3;P35240-4;P35240-5;P35240-6;P35240-8	0	0	0	0	0.558628	0	0	0	0	0	0.441372
A0A5K1VW70;P98198;P98198-3	0.645036	0	0	0	0	0	0	0	0	0	0.354964
A0A5K1VW95;P40925;P40925-3	0	0	0	0	0	0	1	0	0	0	0
A0A669KA36;A0A669KB88;B7ZLR4;E7ET55;F5H748;P35670;P35670-2;P35670-4	0	0	0	0	0.393922	0	0	0	0.301572	0.304506	0
A0A669KAV7;A0A669KBH9;M0QXA7;O95785-3	0	1	0	0	0	0	0	0	0	0	0
A0A669KAW1;G3XAD2;Q9BYC5;Q9BYC5-2;Q9BYC5-3	0	0	0	0	0	0	0	0	1	0	0
A0A669KAX3;O76024	0	0	0.256203	0	0.743797	0	0	0	0	0	0
A0A669KAX4;K4DI93;Q13620;Q13620-1;Q13620-3	1	0	0	0	0	0	0	0	0	0	0
A0A669KAX9;Q5T653	0	0	0	0	0	0	0	1	0	0	0
A0A669KAY5;A0A669KB27;A0A669KBH7;C9JTE9;Q9UHQ4;Q9UHQ4-2
A0A669KB10;A0A669KBG8;Q92538;Q92538-2;Q92538-3	0	0	0	0	0	0.476158	0	0	0.523842	0	0
A0A669KB12;Q09472	0	1	0	0	0	0	0	0	0	0	0
A0A669KB29;K7EQ21;K7EQZ1;Q9P0U4;Q9P0U4-2	0	1	0	0	0	0	0	0	0	0	0
A0A669KB41;A0A669KBH5;D6RA31;E7EPV7;P37840;P37840-2;Q16143	0	0	0	0	0	0	0	1	0	0	0
A0A669KB53;A0A669KB56;A0A669KB68;A0A669KBA4;A0A669KBI6;J3KPM9;P42224;P42224-2	0.301037	0	0	0	0	0	0.698963	0	0	0	0
A0A669KB62;O60716-20;O60716-22;O60716-23;O60716-24	0	0	0	0	0	0	0	0	0	0	1
A0A669KB69;Q6Q788	0	0	0	0	0	0	0	0	0.48054	0.51946	0
A0A669KB71;O94842;O94842-2;O94842-3	0	1	0	0	0	0	0	0	0	0	0
A0A669KB81	0	0	0.405119	0	0	0	0	0	0.594881	0	0
A0A669KBD5;A0A669KBI7;Q9UMN6	0	1	0	0	0	0	0	0	0	0	0
A0A669KBE6;A0A669KBF5;Q9NV96;Q9NV96-2;Q9NV96-3	0	0	0	0	0.588488	0	0	0	0	0.411512	0
A0A669KBF4;O00327;O00327-1;O00327-6;O00327-7;O00327-8;O00327-9	0	1	0	0	0	0	0	0	0	0	0
A0A669KBG1	0	0	0	0	0	0	0	0	1	0	0
A0A669KBH1	0	0	0	0	0	0	0	0.306347	0.296793	0	0.396859
A0A669KBH4;Q14999;Q14999-2	0.741385	0	0	0	0	0.258615	0	0	0	0	0
A0A669KBJ1;Q9P202;Q9P202-3;Q9P202-4	0	0	0.379575	0	0	0	0	0	0	0	0.620425
A0A669KBJ4;E7ERL6;Q6P0Q8;Q6P0Q8-2	0	0	0	0	0	0	0	0	0	1	0
A0A669KBJ7;Q9H2P0	0	1	0	0	0	0	0	0	0	0	0
A0A669KBL1;Q93009;Q93009-3	1	0	0	0	0	0	0	0	0	0	0
A0A6E1WB48;Q14541;Q14541-2	0	0	0	1	0	0	0	0	0	0	0
A0A6I8PIT3;A0A6I8PIV1;Q9P2J5	0.784262	0	0	0	0	0.215738	0	0	0	0	0
A0A6I8PR89	0	0	0	0.357816	0	0	0	0	0.642184	0	0
A0A6I8PRM6;B1ALU3;O95490-2;O95490-5	0	0	0	0	0.518537	0	0	0	0	0	0.481463
A0A6I8PS32;Q99615	0	0	0	0	0	0	1	0	0	0	0
A0A6I8PTZ8;Q9UL18	0	0	0	0.386489	0.613511	0	0	0	0	0	0
A0A6I8PU65;Q9NUD9	0	0	0	0	0.511559	0	0	0	0	0	0.488441
A0A6Q8JGF9;I3L1H5;I3L3X9;Q9BZG8;Q9BZG8-2;Q9BZG8-3	0	0	0	0	0	0	1	0	0	0	0
A0A6Q8JH89;A0A6Q8LYX2;Q86WD7;Q86WD7-2;Q86WD7-4;Q86WD7-5;Q86WD7-6;Q86WD7-7	0	0	0	0	0.582234	0	0	0	0	0	0.417766
A0A6Q8JR05;Q6V0I7;Q6V0I7-3	0.658366	0	0.341634	0	0	0	0	0	0	0	0
A0A6Q8KRG2;Q08379	0	0	0	0	0	0.336651	0	0	0.663349	0	0
A0A6Q8PEX6;A0A6Q8PFB7;A0A6Q8PG86;A0A6Q8PHF4;O95163	1	0	0	0	0	0	0	0	0	0	0
A0A6Q8PEY3;A0A6Q8PGV6;I3L3G9;I3L522;Q9NXR1;Q9NXR1-1
A0A6Q8PEZ4;A0A6Q8PFG4;A0A6Q8PGL3;A0A6Q8PGS2;A0A6Q8PGU0;A0A6Q8PH79;B4DIH2;Q8TB36;Q8TB36-2	0	0	0	0.270885	0	0	0	0.729115	0	0	0
A0A6Q8PEZ7;A0A6Q8PG30;A0A6Q8PHQ1;Q96S66	0	0	0	0	0.74305	0	0	0	0	0	0.25695
A0A6Q8PF03	1	0	0	0	0	0	0	0	0	0	0
A0A6Q8PF05;B4DHE8;J3KTC1;Q96DH6;Q96DH6-2	0	0	0	0	1	0	0	0	0	0	0
A0A6Q8PF10;A0A6Q8PF85;A0A6Q8PFT0;A0A6Q8PFW0;A0A6Q8PFY8;A0A6Q8PG57;A0A6Q8PHF1;B0QYZ8;B0QYZ9;O95461;O95461-2;V9GY39;V9GY56;V9GYK8;X5DRG1	0	0	0	0	0	0	0	0.357831	0.642169	0	0
A0A6Q8PF14	0	0	0	0	0	0	0	0	1	0	0
A0A6Q8PF33;A0A6Q8PGE8;A0A6Q8PGN5;H3BPK7;P49588	0	0	0	0	0	0	1	0	0	0	0
A0A6Q8PF40;A0A6Q8PFC4;A0A6Q8PFY7;A0A6Q8PG00;A0A6Q8PG04;A0A6Q8PGS4;A0A6Q8PH27;A0A6Q8PH89;Q92734;Q92734-2;Q92734-3;Q92734-4	0	0	0	0	0	0	1	0	0	0	0
A0A6Q8PF44;A0A6Q8PH71;A0A6Q8PHA2;A0A6Q8PHG2;Q27J81;Q27J81-2
A0A6Q8PF62;A0A6Q8PF70;A0A6Q8PF86;A0A6Q8PFJ3;A0A6Q8PG59;A0A6Q8PGB4;A0A6Q8PGP4;A0A6Q8PGY4;A0A6Q8PGY7;A0A6Q8PHA1;A0A6Q8PHC7;A0A6Q8PHH5;A0A6Q8PHK3;A0A6Q8PHP5;Q92562	0.614915	0	0	0	0	0.385085	0	0	0	0	0
A0A6Q8PF94;O15344	0	0	0	0	1	0	0	0	0	0	0
A0A6Q8PFA4;A0A6Q8PFD4;A0A6Q8PFI6;A0A6Q8PFL5;A0A6Q8PFT9;A0A6Q8PFW1;A0A6Q8PG02;A0A6Q8PG22;A0A6Q8PGB2;A0A6Q8PGF7;A0A6Q8PGH6;A0A6Q8PGT8;A0A6Q8PGW1;A0A6Q8PGY0;A0A6Q8PH15;A0A6Q8PH70;A0A6Q8PH85;Q6UWE0;Q6UWE0-2	0	0	0	0	0	0	1	0	0	0	0
A0A6Q8PFA6;A0A6Q8PG37;A0A6Q8PGH7;A0A6Q8PH57;O00139;O00139-1;O00139-2;O00139-4;O00139-5	0	1	0	0	0	0	0	0	0	0	0
A0A6Q8PFE6;Q9UKA9;Q9UKA9-2;Q9UKA9-3;Q9UKA9-4	0	1	0	0	0	0	0	0	0	0	0
A0A6Q8PFG0;A0A6Q8PGT4;A0A6Q8PH04;A0A6Q8PHN3;A0A6Q8PHP9;Q9P212;Q9P212-2	0	0	0.548828	0	0	0	0	0	0.451172	0	0
A0A6Q8PFI8;P11166	0	0	0	0	0	0.302329	0	0	0.351466	0.346205	0
A0A6Q8PFJ0;P02545	0	1	0	0	0	0	0	0	0	0	0
A0A6Q8PFJ4;A0A6Q8PGV8;O95140	0	0	0	0.328865	0	0	0	0.671135	0	0	0
A0A6Q8PFK4;P50747	0	0	0	0	0	0	1	0	0	0	0
A0A6Q8PFM5;O95831;O95831-3	0	0	0	0	0	0	0	1	0	0	0
A0A6Q8PFM9;A0A6Q8PFQ9;A0A6Q8PG83;A0A6Q8PGL8;A0A6Q8PGP3;A0A6Q8PGR8;A0A6Q8PH28;Q96JN0;Q96JN0-2;Q96JN0-3	0	0	0	0.324766	0	0.254641	0	0	0	0	0.420593
A0A6Q8PFU3;P43034	0.356963	0	0	0	0	0	0.643037	0	0	0	0
A0A6Q8PG52;A0A6Q8PH84;P51149	0	0	0.398644	0	0	0	0	0	0	0.601356	0
A0A6Q8PG54;G3XAG5;P51793;P51793-2	0	0	0	0	0	0.402764	0	0	0.597236	0	0
A0A6Q8PG85;Q9HD42	0	0	0	0	0	0	1	0	0	0	0
A0A6Q8PGA8;A0A6Q8PGI6;A0A6Q8PGZ8;A0A6Q8PHH9;P41250	0.308052	0	0	0	0	0	0.691948	0	0	0	0
A0A6Q8PGB0;P24928	0	1	0	0	0	0	0	0	0	0	0
A0A6Q8PGM6;Q9UJY1
A0A6Q8PGS5;A0A6Q8PHS7;C9JEX3;Q13614;Q13614-2	0	1	0	0	0	0	0	0	0	0	0
A0A6Q8PGU6;Q8NB90	1	0	0	0	0	0	0	0	0	0	0
A0A6Q8PH13;A0A6Q8PH87;Q86WG5;Q86WG5-3	0	0.533628	0	0	0	0	0	0	0	0	0.466372
A0A6Q8PH21;Q9UHW9;Q9UHW9-2;Q9UHW9-3;Q9UHW9-4;Q9UHW9-5;Q9UHW9-6	0	0	0	0	0	0	0	1	0	0	0
A0A6Q8PH68;Q9UGU0;Q9UGU0-2	0	0.453451	0	0	0	0	0	0	0.546549	0	0
A0A6Q8PH82	0	0	0	0	0	0	0	0	0.38366	0	0.61634
A0A6Q8PHA5;E7ETE2;P12081;P12081-4	0	0	0	0	0	0	1	0	0	0	0
A0A6Q8PHC6;P50440	0	0	0	0	0	0	0	1	0	0	0
A0A6Q8PHH2;O95251;O95251-2;O95251-4	0	1	0	0	0	0	0	0	0	0	0
A0A6Q8PHK0;Q14669-2	0	1	0	0	0	0	0	0	0	0	0
A0A6Q8PHM5	0	0.447023	0	0	0	0	0	0.552977	0	0	0
A0A6Q8PHP0;P49902;P49902-2	1	0	0	0	0	0	0	0	0	0	0
A0AV96-2	0	1	0	0	0	0	0	0	0	0	0
A0AVL1;F8WC54;Q13443;Q13443-2	0	0	1	0	0	0	0	0	0	0	0
A0AVT1	0	0	0	0	0	0	1	0	0	0	0
A0JLT2;A0JLT2-2;J3KR33	0	1	0	0	0	0	0	0	0	0	0
A0MZ66	0	0	0	0	0	0	1	0	0	0	0
A0PJW6	0	0.203013	0	0	0	0	0	0.796987	0	0	0
A0PJX8	0	0	0	0	0.591705	0	0	0	0	0.408295	0
A0PJZ3;C9JND4	0	0	0.357265	0	0	0	0	0	0.302124	0	0.340611
A0RZB6	0.393896	0	0	0	0	0	0.606104	0	0	0	0
A1A4S6;H0Y8W5	0	0.517807	0.212116	0	0	0	0	0	0	0	0.270077
A1A519;A1A519-2;A1A519-3;D6RIE9
A1A5C7;A1A5C7-2;A1A5C7-3;C9J4Z0	0	0	0	0	0	0	0	0	0	0	1
A1IGU5	0	1	0	0	0	0	0	0	0	0	0
A1KZ92;A1KZ92-2;A1KZ92-3;H0YAV0;K4DIA6	0	0.592496	0	0	0	0	0	0	0.407504	0	0
A1L0T0	0	0	0	0	1	0	0	0	0	0	0
A1L188	0	0	0	0	0	0	0	1	0	0	0
A1L390;A1L390-3
A1L3X0;D6RBM2;D6RHD0
A1X283	0	0	0.332774	0	0	0	0.667226	0	0	0	0
A2A274;Q99798	0	0	0	0	0	0	0	1	0	0	0
A2A2L4;Q5JX74;Q9NUS5	0	0	0	0	0	0	0	0	1	0	0
A2A2N0;O60676	0	0	0.293096	0	0	0	0	0.706904	0	0	0
A2A2Q9;Q9Y312	0.324802	0	0	0	0	0	0.675198	0	0	0	0
A2A2V1;P04156	0	0	0	0	0	0	0	0	0.269595	0.219768	0.510638
A2A2V2;P42696;P42696-2;Q5TCT4	0	1	0	0	0	0	0	0	0	0	0
A2A369;Q8NF50;Q8NF50-2;Q8NF50-3;Q8NF50-4	0	0	0	0	0.644314	0	0	0	0	0	0.355686
A2A3G7	0	0	0	0	0	0	0	0	1	0	0
A2AJT9;A2AJT9-2;A2AJT9-3;F2Z385;H7BXX2	0	0.537002	0	0	0	0	0	0	0.462998	0	0
A2IDC6;Q13084	0	0	0	0	0	0	0	1	0	0	0
A2RRP1	0	0	0	0	0.565326	0	0	0	0	0.434674	0
A2RTX5;B7ZLP8	0.716088	0	0	0	0	0.283912	0	0	0	0	0
A2RU37	0	0	0	0	0	0	0	0	1	0	0
A2RU49	0	0	0	0	0	0	1	0	0	0	0
A2RUC4	0.486202	0	0	0	0	0	0.513798	0	0	0	0
A2RUS2;A2RUS2-2;A2RUS2-4;E5RHH2;E5RI43;E5RIR7;E5RJ42;E9PF32;H0YAY3	0	0	0	0	0	0	0	1	0	0	0
A2VDF0	0	0	0	0	0	0	1	0	0	0	0
A2VDJ0;A2VDJ0-3;A2VDJ0-5	0	1	0	0	0	0	0	0	0	0	0
A3KFL2;Q13868;Q13868-2;Q13868-3	0	1	0	0	0	0	0	0	0	0	0
A3KMH1;A3KMH1-3	0	0	0	0	0	0	0	1	0	0	0
A3KN83;A3KN83-2;A3KN83-3
A4D1E9	0	0	0	0	0	0	0	1	0	0	0
A4D1P6	1	0	0	0	0	0	0	0	0	0	0
A4D1U4;C9J7X6	0	0	0	0	0	0.472412	0	0	0.527588	0	0
A4D2B0	0	0	0	0	0	0	1	0	0	0	0
A5D8V6;F5H4Q5
A5D8V7;A5D8V7-2;K7EN59;K7EPK8	0	0	0	0	0	0	0	1	0	0	0
A5PLN9;A5PLN9-2;A5PLN9-4;A5PLN9-5	0.628334	0	0	0	0	0.371666	0	0	0	0	0
A5YKK6;A5YKK6-2	0	0	0	1	0	0	0	0	0	0	0
A6H8Y7;Q6ZRK6;Q6ZRK6-2	0	0	0	0	0	0	0	0	0.634531	0	0.365469
A6NC78	0	0	0	0	0	0	0	1	0	0	0
A6NC98;A6NC98-4;A6NC98-6	0.729381	0	0	0	0	0.270619	0	0	0	0	0
A6NCC9;C9JHT9;C9JJV1;E9PME3;Q9Y5U2;Q9Y5U2-2	0	0	0	0	0	0	1	0	0	0	0
A6NCE7;H3BTL1;Q9GZQ8	0	0	0.371719	0	0	0	0	0	0	0.628281	0
A6NCS6	0	0	0	0.237696	0.374844	0	0	0	0	0	0.38746
A6ND36
A6ND91	0	0	0	0	0	0	1	0	0	0	0
A6NDG6	0	0	0	0	0	0	1	0	0	0	0
A6NDL8	0	0	0	0	0	0	0	1	0	0	0
A6NDR6	0.449522	0.279082	0	0.271396	0	0	0	0	0	0	0
A6NDU8	0	0	0	0	0	1	0	0	0	0	0
A6NE01;F5GYN0;F5H8C1	0.486218	0	0	0	0	0.275842	0	0	0.23794	0	0
A6NED2;G3V2I3	0.342598	0	0	0	0	0	0.657402	0	0	0	0
A6NEE1	0.650001	0	0	0	0	0.349999	0	0	0	0	0
A6NEL0;A6NL93;P05114	0	1	0	0	0	0	0	0	0	0	0
A6NEL2	0	0.569015	0	0	0	0	0	0	0	0	0.430985
A6NEM2;P51610;P51610-2;P51610-4	0	1	0	0	0	0	0	0	0	0	0
A6NEY8	0	0	0	0	0	0	1	0	0	0	0
A6NF36	0	0	0	0	0	0	0	1	0	0	0
A6NFQ9;F8W8I8
A6NFS0;Q9NSD4;Q9NSD4-2	0	0	0	0	0	0	0	0	0.47125	0	0.52875
A6NFV8;D6RCT8	0	1	0	0	0	0	0	0	0	0	0
A6NFX8;Q9UKK9	0	0	0	0	0	0	1	0	0	0	0
A6NFY7	0	0	0	0	0	0	0	1	0	0	0
A6NG10;K7EIJ0;K7EMC9;K7ENL2;Q969T9	0	0	0	0	0	0	1	0	0	0	0
A6NGA6;Q5H9D4;Q9Y5S8;Q9Y5S8-2;Q9Y5S8-3	0	0	1	0	0	0	0	0	0	0	0
A6NGJ0;P51808	0	0	0	0	0	0.440476	0	0	0.559524	0	0
A6NGL4;P0CW00	0.495977	0.270474	0.233548	0	0	0	0	0	0	0	0
A6NGN6;B1AJZ5;Q9NR34	0	0	0	0	0	0.306933	0	0	0.277878	0.415188	0
A6NGQ3;Q5VST9;Q5VST9-2;Q5VST9-6	0	0	0	0.454596	0.545404	0	0	0	0	0	0
A6NGU5;B5MCK8;P19440	0	0	0	0	0.54805	0	0	0	0	0	0.45195
A6NGW1;O95070	0	0	0	0	0	0	0	0	1	0	0
A6NGY7;Q9H694-2	0	0	0	0	0.631126	0	0	0	0	0	0.368874
A6NH11	0	0	0	0	0	0.246662	0	0	0.753338	0	0
A6NHB5;A6NHN7;A6NL54;Q14202;Q14202-2;Q14202-3	0	0	1	0	0	0	0	0	0	0	0
A6NHG8;Q13114	0	0	0	0	0.644237	0	0	0	0	0	0.355763
A6NHJ8;A6NND8;C9JAL0;C9K0F7;H7C3I5;O95825;O95825-2	0	0	0	0	0	0.495621	0	0	0.504379	0	0
A6NHR9;A6NHR9-2	0	0.770263	0.229737	0	0	0	0	0	0	0	0
A6NI28;E9PJK4	0	0	0	0	0.575821	0	0	0	0	0	0.424179
A6NI72;A8MVU1;C9J155;P14598;P14598-2	0	0	0	0	0	0	0	0	1	0	0
A6NIH7	0.356275	0	0	0	0	0	0.643725	0	0	0	0
A6NIT2;A6NMN0;P46020;P46020-2;P46020-3	0.765308	0	0	0	0	0.234692	0	0	0	0	0
A6NIV6	0	0	0	0	0	0	0	0	1	0	0
A6NIZ0;Q9GZM8;Q9GZM8-2;Q9GZM8-3
A6NJA2;P54578;P54578-2;P54578-3	1	0	0	0	0	0	0	0	0	0	0
A6NK44;H7C348	0	0	0	0	0	0.298574	0	0.354302	0.347124	0	0
A6NKB5-2	0	0.449756	0.550244	0	0	0	0	0	0	0	0
A6NKD9	0	0	0	0	0	0	0	0	0	0	1
A6NKN8	0	0	0	0	0	0	1	0	0	0	0
A6NKZ2;P51606	1	0	0	0	0	0	0	0	0	0	0
A6NLH6;Q9P003	0	0	0	0	0.482675	0	0	0	0.254479	0.262846	0
A6NLN1;P26599;P26599-2;P26599-3	0	1	0	0	0	0	0	0	0	0	0
A6NLP5	0	0	0	0	0	0	1	0	0	0	0
A6NMH6;Q92599;Q92599-2;Q92599-4	0	0	0	1	0	0	0	0	0	0	0
A6NMH8;E9PIF1;E9PJK1;E9PRJ8;H0YDJ9;H0YDL9;P60033	0	0	0	0.273936	0.355921	0	0	0	0	0	0.370143
A6NML8;C9J6U3;O60879-2	0.429077	0	0	0	0	0	0.570923	0	0	0	0
A6NMQ3;O43768;O43768-2;O43768-3;O43768-4;O43768-9;Q5T5H1	0	0	0	0	0	0	1	0	0	0	0
A6NMV7	0	0	1	0	0	0	0	0	0	0	0
A6NMZ5	0	0	0	0	0	0	0	0	0.420272	0	0.579728
A6NMZ7;A6NMZ7-2	0	0.608786	0	0	0	0	0	0.391214	0	0	0
A6NN50;O75147;O75147-1;O75147-2;O75147-4	1	0	0	0	0	0	0	0	0	0	0
A6NN73
A6NNK5;Q12888;Q12888-2;Q12888-3	0	1	0	0	0	0	0	0	0	0	0
A6NP16;E7ERM3;Q4VCS5;Q4VCS5-2	0	0.46155	0	0	0	0	0	0	0	0	0.53845
A6NP52;O60831	0	0	0	0	1	0	0	0	0	0	0
A6PVD3;P48436;P56693;P56693-2;P57073	0	0	0.415995	0	0	0	0	0	0.584005	0	0
A6PVK5	0	0	0	0	0	0.497132	0	0	0.502868	0	0
A6PVP4;B7ZBQ1;B7ZBQ3;Q9H944;Q9H944-2	0	1	0	0	0	0	0	0	0	0	0
A6PVU8;Q6UWW7;Q9NNX1;Q9NNX1-2;Q9NNX1-3	0	0	0	0	0	0	0	0	0	0	1
A6PVY1;A6PVY2;A6PVY3;A6PVY3-2
A6PW57;Q99755;Q99755-3;Q99755-4	0	0.542837	0	0	0	0	0	0	0	0	0.457163
A6PWM2;Q6UXH1;Q6UXH1-2;Q6UXH1-3;Q6UXH1-4;Q6UXH1-5;Q6UXH1-6	0	0	0	0	0.728609	0	0	0	0	0	0.271391
A6QRJ0;P49184	0.419375	0	0	0	0	0.222158	0	0	0.358467	0	0
A6XND0;A6XND1;B3KWK7;C9JMX4;H0Y5K2;P17936;P17936-2	0	0	0	0	0	0	0	0	0	0.437409	0.562591
A7E2V4;A7E2V4-3;A7E2V4-4;A7E2V4-5;S4R393;S4R410	0.672391	0	0	0	0	0.327609	0	0	0	0	0
A7KAX9;A7KAX9-2	0	0	0.354194	0	0	0	0.645806	0	0	0	0
A7MCY6	0	0	0	0	0	0.309892	0	0.690108	0	0	0
A7XZE4;Q3SX28	0	0	0	1	0	0	0	0	0	0	0
A8CG34;A8CG34-2	0	1	0	0	0	0	0	0	0	0	0
A8DPD7;Q9C0D3	0.76061	0	0	0	0	0.23939	0	0	0	0	0
A8K7Q2	1	0	0	0	0	0	0	0	0	0	0
A8K979;A8K979-2	0	0	0.315857	0	0	0	0	0	0.684143	0	0
A8MPP7;A8MPY5;E7ETV6;Q9UPE1;Q9UPE1-2;Q9UPE1-3;Q9UPE1-4	0	0.470826	0	0.529174	0	0	0	0	0	0	0
A8MQ02	0	0.447158	0	0	0	0	0	0	0	0	0.552842
A8MQB8;G3V0J0;Q06787-2	0	0	0.223501	0	0.366383	0	0	0	0	0	0.410116
A8MSI8;D6RAR2;D6RFL2;J3KTA2	0	0	0.505816	0	0	0	0	0.494184	0	0	0
A8MSY1;C9JYJ2;Q8IVN3	0	0	0.189236	0	0	0	0.810764	0	0	0	0
A8MTF7;Q96EV2;Q96EV2-2	0	0	0.285583	0.354929	0	0	0	0.359488	0	0	0
A8MTT3	0	0	0	0	0	0	0	1	0	0	0
A8MU21;Q9BVK8;Q9BVK8-2	0	0	0	0.366428	0	0	0	0.42021	0	0	0.213362
A8MUM1;Q53HC9	0	1	0	0	0	0	0	0	0	0	0
A8MV81	0	0	0	0	0	0	0	0	0.413753	0	0.586247
A8MVV6;E9PN41;E9PPX8;E9PSH3;J3KQ42;O14817	0	0	0	0	0	0	0	0	0	0	1
A8MVZ6;Q96G01;Q96G01-3;Q96G01-4	0	0.737176	0	0	0	0	0	0	0.262824	0	0
A8MWD9;F5H013;P62308;Q49AN9	0	1	0	0	0	0	0	0	0	0	0
A8MXB7	0.363384	0	0	0	0	0	0.636616	0	0	0	0
A8MXP9	0	1	0	0	0	0	0	0	0	0	0
A8MXV4	0	0	0	0	0	0	0	1	0	0	0
A8MYA3;J3KQ25;Q8N6M9	0	0	0.634623	0	0	0	0	0	0.365377	0	0
A8MYU2;E5RHP1
A8MYZ0	0	0.408061	0	0	0	0	0	0	0	0	0.591939
A8TX70;A8TX70-2;E9PAL5	0	0.4341	0.210084	0	0	0	0	0.355816	0	0	0
A9J4F5;O00488	0	0	0.369483	0.630517	0	0	0	0	0	0	0
A9X3U0;Q96GF1
A9Z1X7;E9PCT1;Q8IYB3;Q8IYB3-2	0	1	0	0	0	0	0	0	0	0	0
B0QY89;Q9Y262	0.664826	0	0	0	0	0.335174	0	0	0	0	0
B0QY95;Q9NQG6	0	0	0	0	0	0	0	0	1	0	0
B0QYF8;P02144	0	0	0.181502	0	0	0	0.818498	0	0	0	0
B0QYK0;Q01844;Q01844-3;Q01844-5;Q01844-6
B0QYN7;H3BQQ9;P63279	0	0	0	0	0	0	1	0	0	0	0
B0QYP2;O95931	0	1	0	0	0	0	0	0	0	0	0
B0QYW5;F6RTR7;O43808	0	0	0	0.387091	0	0	0	0.612909	0	0	0
B0QZ18;F2Z2V0;Q99829	0	0	0	0	0	0	1	0	0	0	0
B0YIW2;P02656	0	0	0	0	0.631224	0	0	0	0	0.368776	0
B1AH77;B1AH80;P15153	0	0	0	0	0.536193	0	0	0.463807	0	0	0
B1AH87;P30536	0	0.231901	0	0	0	0	0	0.768099	0	0	0
B1AHA8;P09601	0	0	0	0	0.584733	0	0	0	0	0.415267	0
B1AHB1	0	0	0.428845	0	0	0.571155	0	0	0	0	0
B1AHL2;P23142;P23142-2;P23142-3;P23142-4	0	0	0	0	0	0	1	0	0	0	0
B1AHR2	0	0	0.169625	0	0	0	0.830375	0	0	0	0
B1AJQ6;Q86Y82	0	0	0	0	0	0	0	0	0.50035	0.49965	0
B1AJS1;O14525;O14525-2;O14525-3	0.448289	0.551711	0	0	0	0	0	0	0	0	0
B1AK53	0	0	0	0	0	0	0	0	0	0.427391	0.572609
B1AK61;Q5VTY9;Q5VTY9-2;Q5VTY9-3;Q5VTY9-5;Q5VTY9-6;Q5VTY9-7	0	0	0	0	0	0	0	0	1	0	0
B1AK88;P47756-2
B1AKC9;P29323;P29323-2;P29323-3	0.456251	0	0.225196	0	0	0.318554	0	0	0	0	0
B1AKG0;Q03591	0	0	0	0	0.455227	0	0	0	0.26397	0	0.280803
B1AKI6;Q9NUK0;Q9NUK0-2
B1AKL4;Q9NRA8;Q9NRA8-2;Q9NRA8-3	0	0	0	0	0	0.500934	0	0	0.499066	0	0
B1AKR6;Q9NP97	1	0	0	0	0	0	0	0	0	0	0
B1AL05;H0Y6Y8;Q8N983;Q8N983-2;Q8N983-3;Q8N983-4;Q8N983-6;Q8N983-7	0	0	0	0	0	0	0	1	0	0	0
B1AL69;Q7L3B6	0	0	0	0	0	0	1	0	0	0	0
B1ALA9;P60891	1	0	0	0	0	0	0	0	0	0	0
B1ALD1;Q9Y6B7	0	0	0	0	0	0.45213	0	0	0.54787	0	0
B1ALM5;Q9P0T7	0	0	0	0	0	0	0	0	0.563499	0.436501	0
B1ALY0;Q8IXS6-2	0	0	0	0	0	0	1	0	0	0	0
B1AM21	0	0	0	0.398447	0	0	0	0.601553	0	0	0
B1AM27;O14795;O14795-2	0.658703	0	0	0	0	0.341297	0	0	0	0	0
B1AMI2	0	0	0.254091	0.39265	0	0	0	0	0	0	0.353259
B1AMN7;Q9P2B4
B1AMS2;Q14141;Q14141-2;Q14141-4	0	0	0	1	0	0	0	0	0	0	0
B1AMW1;H0YDI1;P19256;P19256-2;P19256-3	0	0	0	0	0.411096	0	0	0	0	0	0.588904
B1ANE6	0	0	0.611626	0	0	0	0	0	0	0.388374	0
B1ANH0;B1ANH2;Q16774;Q16774-2	0	0	0	0	0	0	1	0	0	0	0
B1APN9;O75335	0	0	1	0	0	0	0	0	0	0	0
B1APR7;Q99504;Q99504-2;Q99504-3;Q99504-4;Q99504-5	0.697191	0	0	0	0	0.302809	0	0	0	0	0
B1AQK6;B1AQK7;E9PDR3;F6RH32;Q00975;Q00975-2	0	0.597124	0	0	0	0	0	0.402876	0	0	0
B1AQP5;O75618;O75618-2;V9GY27	0	1	0	0	0	0	0	0	0	0	0
B1AVT0;P49760;P49760-3	0	1	0	0	0	0	0	0	0	0	0
B1AXG1;B4DG22;B7ZB17;P51812	0	0	0	0	0	0	1	0	0	0	0
B2RC85;B2RC85-2;H0YFY2;P0C881	0	0	0.295545	0	0	0	0	0	0.704455	0	0
B2WTI3;B2WTI4;K7EJU9;Q6NYC1;Q6NYC1-2;Q6NYC1-3	0	0	0	0	0	0	0	0	1	0	0
B3EWG3;B3EWG5;B3EWG6	0	0	0	0	0	0	1	0	0	0	0
B3KP42	0	0.563917	0	0	0	0	0	0.436083	0	0	0
B3KP96;H0Y626;J3QKY5;K7EL43;K7ENN8;O95361;O95361-2	0	0	0	0	0	0	0	0	1	0	0
B3KS81	0	0	0	0	0	0.448522	0	0	0.551478	0	0
B3KT41;Q496J9	1	0	0	0	0	0	0	0	0	0	0
B3KTM8;H0YLJ3;Q9UBU8-2	0	1	0	0	0	0	0	0	0	0	0
B3KUS5;Q70CQ3	0	0.429645	0	0	0	0	0	0.570355	0	0	0
B3KVY5;F5GWA4;F5GWK6;F5H268;Q9H3F6;Q9H3F6-2;Q9H3F6-3	0	0	0	0	0	0	0	1	0	0	0
B3KWA8;F8VZJ5;O43306;O43306-2;O95622;O95622-2	0	0	0.249893	0	0	0	0	0	0	0	0.750107
B3KY94;O14735;O14735-3	0	0	0	0	1	0	0	0	0	0	0
B4DDD6	0	0	0	0	0	0	1	0	0	0	0
B4DDF4;B4DUT8;Q99439	0	0	0	0	0	0	1	0	0	0	0
B4DDX3;H7C1L4;Q8TCB7	0.746505	0	0.253495	0	0	0	0	0	0	0	0
B4DEE8;P16455
B4DEN4;B8ZZ56;E7EV05;E9PFU9;Q8WV99;Q8WV99-2	0	0	0	0	0	0	0	0	0.725542	0.274458	0
B4DFC0;E9PMV6;E9PR50;G3V1B4;H0YD20;H0YE53;H0YEL8;Q9UGK8;Q9UGK8-2	0.595	0	0.405	0	0	0	0	0	0	0	0
B4DFG5;K7EMR4;K7EMW3;Q9BZJ4;Q9BZJ4-2	0	0	0.225562	0	0	0	0	0.447482	0	0	0.326956
B4DI03;K7EJQ7;Q9BY50	0	0	0	0	1	0	0	0	0	0	0
B4DJ07	0	0	0.398357	0	0	0	0	0	0.601643	0	0
B4DJ62;C9JM82;E7EPG2;E7EQM7;E7EX32;F8W9E5;G3XAH0;Q99719;Q99719-2	0	0.554366	0	0	0	0	0	0.445634	0	0	0
B4DJC3	0	0	0	0	0	0	0	0	1	0	0
B4DJV2;O75390	0	0	0	0	0	0	0	1	0	0	0
B4DJV5;Q13610	0.36636	0	0	0	0	0	0.63364	0	0	0	0
B4DK73	0	0	0	0	0	0	0	0	0.657971	0.342029	0
B4DK77;Q9H6K4	0	0	0	0	0	0	0	1	0	0	0
B4DL54	0	0	0	0	0	0	1	0	0	0	0
B4DLJ1	0	1	0	0	0	0	0	0	0	0	0
B4DLN1	0	0	0.21929	0	0	0	0	0.423628	0	0	0.357082
B4DLP0;B8ZZF7;O00338;O00338-2	0	0	0	0	0	0	1	0	0	0	0
B4DR61;P61619	0	0	0	0	0	0	0	1	0	0	0
B4DR80;Q9Y6E0;Q9Y6E0-2
B4DUC8;Q13126	0	0	0	0	0	0	1	0	0	0	0
B4DUJ5;Q8IWP9	0	0	0	0	0	0	0	0	0	0	1
B4DVL7;Q9NQ25-3;Q9NQ25-4;Q9NQ25-5	0	0	0	0	0	0	0	0	0.4656	0	0.5344
B4DVN3;E7ESC7;Q7L5Y9;Q7L5Y9-3	1	0	0	0	0	0	0	0	0	0	0
B4DVT3;Q96SY0	0	0.305217	0	0	0	0.346949	0	0	0	0.347833	0
B4DWG0;B4E372;O95199;O95199-2	0	0.608428	0	0	0	0	0	0	0	0	0.391572
B4DXZ6;P51114	0	0	0	0	0.70429	0	0	0	0	0	0.29571
B4DYU2;H3BQV3;Q96MW5	0.678161	0	0	0	0	0.321839	0	0	0	0	0
B4DYY6;Q75T13;Q75T13-2;Q75T13-3	0	0	0	0	0.630263	0	0	0	0	0	0.369737
B4DZK5;Q9HAQ2;Q9HAQ2-2	0	0	0	0	0	0	0	0	0.517744	0	0.482256
B4E0E3;G3V1M5;Q9H6X4;Q9H6X4-2;Q9H6X4-3	0	1	0	0	0	0	0	0	0	0	0
B4E0T2;P50542;P50542-4	0	0	0	1	0	0	0	0	0	0	0
B4E0Y9;Q8NBY1;Q9P289	0	0	0	0	0	0.28417	0	0	0.402976	0.312854	0
B4E107;F5GXE4;O95260-2	0	0	0	0	0	0	1	0	0	0	0
B4E1G1;Q9BUN8;Q9BUN8-2	0	0	0	0	0.715251	0	0	0	0.284749	0	0
B4E1Q4;O14730	1	0	0	0	0	0	0	0	0	0	0
B4E1Z4
B4E2Q0;P98194;P98194-4	0	0	0	0	0	0.346847	0	0	0.653153	0	0
B4E3T4;Q93062;Q93062-2;Q93062-3;Q93062-4;Q93062-5
B5MBZ0	0	0	0	0	0	0.40324	0	0	0.59676	0	0
B5MC20;P0C870	0	0	0.206347	0	0	0	0.793653	0	0	0	0
B5MC22;Q9UDX5	0	0	0	0	0	0	0	1	0	0	0
B5MC35;B5MCA1;B5MD16;Q96G28;Q96G28-2	0	1	0	0	0	0	0	0	0	0	0
B5MC51;P53671-3	0	0	0	0	0	0	0	0	0.3403	0	0.6597
B5MC53;B5MCF8;E7EX18;G5E9F5;P39210	0	0.568124	0	0	0	0	0	0.431876	0	0	0
B5MCA4;P16422	0	0	0.235147	0.365821	0	0	0	0	0	0	0.399032
B5MCF4;C9JDC5;P05230;P05230-2	0	0	0	0	0	0	1	0	0	0	0
B5MCF9;O00541;O00541-2	0	1	0	0	0	0	0	0	0	0	0
B5MCQ6;B5MCU6;B5MCV5;E7ETT9;Q96DB2;Q96DB2-2	0	0	0.585023	0	0	0	0	0	0	0	0.414977
B5MCX7;C9JX82;D3YTC9;F8WB76;H7C3L3;Q6NXT1;Q6NXT1-2	0	0	0	0	0	0	1	0	0	0	0
B5MD46;F8W9Y7;F8WCD1;H0Y2U5;H0Y5R9;H7C1Q1;H7C471;Q9BXI6;Q9BXI6-2	0	0	0	0	0	0	0	0	0.342895	0.27298	0.384125
B5MDF5;J3KQE5;P62826	0	0	0	0	0	0	1	0	0	0	0
B5MDL5;P53778;P53778-2	0	0	1	0	0	0	0	0	0	0	0
B5MDU6;Q9H6V9;Q9H6V9-2	0	0	0.626947	0	0	0	0	0	0	0.373053	0
B5ME97;E7EW69;E7EX04;Q9P0V9;Q9P0V9-2;Q9P0V9-3	0	0.531938	0	0.468062	0	0	0	0	0	0	0
B5MEF5;Q8TER0;Q8TER0-3;Q8TER0-4;Q8TER0-5	0	0	0	0	0.609827	0	0	0	0	0	0.390173
B7WNH4;E9PLH2;E9PNA8;E9PP42;M0QYU9;M0R0R3;M0R2G5;Q9BQ49	0	0	0	0	0	0	0	0	1	0	0
B7WNR7;Q5HYL7-4	0	0	1	0	0	0	0	0	0	0	0
B7WP74;Q9HCG8	0	1	0	0	0	0	0	0	0	0	0
B7WPE2;Q32P44	0.427168	0	0	0	0	0	0.572832	0	0	0	0
B7WPG3;C9IYN3;Q8WVV9;Q8WVV9-4;Q8WVV9-5;V9GYK2	0	1	0	0	0	0	0	0	0	0	0
B7WPL0;Q9NVN3;Q9NVN3-1;Q9NVN3-3	0	0	1	0	0	0	0	0	0	0	0
B7WPL9;F8W9A8;Q6PFW1;Q6PFW1-2;Q6PFW1-3;Q6PFW1-4;Q6PFW1-5;Q6PFW1-6;Q6PFW1-7	0	0	0.338663	0	0	0	0.661337	0	0	0	0
B7Z1G8
B7Z278;Q8WZA2;Q8WZA2-2;Q8WZA2-3;Q8WZA2-4;Q8WZA2-5
B7Z2D2;H7C4Y6;Q8NHQ1;Q8NHQ1-4;Q8NHQ1-5	0	0	0	0	0	0	0	1	0	0	0
B7Z2R2;P14927;P14927-2	0	0	0	0	0	0	0	1	0	0	0
B7Z2R7;Q5T8D3;Q5T8D3-2;Q5T8D3-3	0	0	0	1	0	0	0	0	0	0	0
B7Z2X5;H0YDC6	0	0.608048	0	0	0	0	0	0	0	0	0.391952
B7Z493;E9PJX4;F8VWL3
B7Z4L1;B7Z4U3;E7EPD9;E7EPW5;E9PCV1;G3XAH9;H7BXS2;Q9NRC1-2;Q9NRC1-3;Q9NRC1-4;Q9NRC1-5;Q9NRC1-6	0	0	0	0	1	0	0	0	0	0	0
B7Z4S1	0	0	1	0	0	0	0	0	0	0	0
B7Z4W8;E9PD09;Q96HH9;Q96HH9-2;Q96HH9-3;Q96HH9-4;Q96HH9-5	0	0	0	0	0.519059	0	0	0	0	0	0.480941
B7Z5P7;O60711;O60711-2	0	0	0	0.584188	0	0	0	0	0	0	0.415812
B7Z6D5;Q96GQ7	0	1	0	0	0	0	0	0	0	0	0
B7Z6J7;H7C148;O75175
B7Z6Q0;Q12980	0	0	0	0	0	0	0	0	1	0	0
B7Z7D2;E9PQY3;P11117	0	0	0	0	0	0	0	0	0	1	0
B7Z7P8;P62495;P62495-2
B7Z8H2;O14717;O14717-2;O14717-3;O14717-4;O14717-5;O14717-6;Q7Z3E4
B7Z8Q8;Q6NUS8	0	0	0	0	0.738434	0	0	0	0	0	0.261566
B7Z9C2;F5H4R6;F8VV59;F8VY35;F8W020;F8W0J6;F8W118;F8W543;H0YH88;H0YHC3;H0YIV4;P55209;P55209-2	0	0	0.229897	0	0	0	0.770103	0	0	0	0
B7Z9I1;P11310;P11310-2;Q5T4U5	0	0	0	0	0	0	0	1	0	0	0
B7ZAP0;F5H8L0;Q5R372-5;Q5R372-6;Q5R372-7;Q5R372-8	0	0	0	0	0	0	1	0	0	0	0
B7ZAQ6;B7ZAQ6-2;B7ZAQ6-3;P0CG08	0	0	0	0	0	0	0	0	1	0	0
B7ZBB8	0.614744	0	0	0	0	0.385256	0	0	0	0	0
B7ZBC8;B7ZBC9;O75449	0	0	0.568493	0	0	0	0	0	0	0	0.431507
B7ZC38;Q9NR46	0	0	0	0	0	0	1	0	0	0	0
B7ZKQ9;Q8WTV0-2;Q8WTV0-4	0	0	0	0	0.561093	0	0	0	0	0	0.438907
B7ZL48;C9J7L3;Q460N3;Q460N3-2	0.524652	0	0.475348	0	0	0	0	0	0	0	0
B7ZL88;Q8N8Q8	0	0	0	0	0	0	0	1	0	0	0
B7ZLQ8;E5RJM0;Q17RY0;Q17RY0-2	0	0	0	0	0	0	0	0	1	0	0
B7ZM68;Q6ZNL6;Q6ZNL6-2	0	0	0	0	0	0	0	0	0.37174	0	0.62826
B8ZZ19;H0Y3U0;P20472	0	0	0	0	0	0	1	0	0	0	0
B8ZZ47;H0Y714;Q96G21	0	1	0	0	0	0	0	0	0	0	0
B8ZZ50;B9A044;C9JEL3;O60573;O60573-2	0	0	0	0	0.621781	0	0	0	0	0	0.378219
B8ZZ98;Q8WVK2	0	1	0	0	0	0	0	0	0	0	0
B8ZZ99;F8WCZ3;Q96NT0;Q96NT0-2	0	0	0	0	0.600059	0	0	0	0	0.399941	0
B8ZZD4;Q86VP1;Q86VP1-2;Q86VP1-3;Q86VP1-4	0	0	1	0	0	0	0	0	0	0	0
B8ZZF5;C9J5M4;Q9H8M9	0	0	0	0	0.517793	0	0	0	0	0	0.482207
B8ZZJ6;H7C1S9;Q8TD22	0	0	0	0	0	0	0	1	0	0	0
B8ZZK5;O43924	0	0	0	0	0	0	0.720417	0	0.279583	0	0
B8ZZQ6;P06454;P06454-2	0	0	0	0	0	0	1	0	0	0	0
B8ZZU8;Q15370;Q15370-2	0	0	0	0	0	0	1	0	0	0	0
B8ZZV9;B8ZZX2;Q9H8M1;Q9H8M1-2	0	0.243631	0	0	0	0	0	0.756369	0	0	0
B8ZZY8	0.665436	0	0.334564	0	0	0	0	0	0	0	0
B8ZZZ1;F8W8K9;G5E966;Q96PC3;Q96PC3-2;Q96PC3-3;Q96PC3-4	0	0	0	0	0	0.300662	0	0	0.699338	0	0
B9A057;Q86WW8	0	0	0	0.5223	0	0	0	0.4777	0	0	0
B9A063;Q6PIF6	0	1	0	0	0	0	0	0	0	0	0
B9EGA3;J3KMX2;Q92925;Q92925-2;Q92925-3	0	1	0	0	0	0	0	0	0	0	0
B9EJG8;B9EJG8-2;D6RAQ9;D6RDW6	0	0	0	0	0	0.423517	0	0	0.576483	0	0
B9TWZ6;K7EKS6;Q9Y2X0;Q9Y2X0-2;Q9Y2X0-3;Q9Y2X0-4;Q9Y2X0-5;U3KQ43;U3KQB4	0	0.439957	0	0	0	0	0	0	0.235958	0.324085	0
B9ZVN9;O95602	0	0.427395	0	0	0	0	0	0	0	0	0.572605
C4AMC7;Q6VEQ5	0	0	0	0	0	0.454219	0	0	0	0.545781	0
C4B7M2;Q96JI7;Q96JI7-2;Q96JI7-3	0	0	0.492236	0	0	0	0	0	0.507764	0	0
C4P0D6;C4P0D8;Q99598	0	0	0	0	0	0	1	0	0	0	0
C9IYN7;C9J2D6;C9J9N8;C9JA82;C9JEX8;C9JLH5;Q0PNE2;Q0PNE2-2	0.784901	0	0	0	0	0.215099	0	0	0	0	0
C9IYT0	0	1	0	0	0	0	0	0	0	0	0
C9IZ93;C9J9P8;C9JF62;Q969M7;Q969M7-2;Q969M7-3;Q969M7-7	0	0	0.273107	0	0	0	0.726893	0	0	0	0
C9IZF6;P41247	0	0	0	0	0	0	0	1	0	0	0
C9IZL5;C9JC87;C9JMG3;C9JWL4;F8WCR6;H0Y6K1;O00189	0.626512	0	0	0	0	0	0	0	0	0.373488	0
C9IZN0;Q9NRM6;Q9NRM6-2	0	0	0	0	0.491319	0	0	0	0	0	0.508681
C9IZU8;C9J9T0;Q96AT9	0	0	0	0	0	0	1	0	0	0	0
C9J050;C9JEJ2;P49585	0	0	1	0	0	0	0	0	0	0	0
C9J066;E9PN67;Q8N4C6;Q8N4C6-10;Q8N4C6-11;Q8N4C6-2;Q8N4C6-4;Q8N4C6-5;Q8N4C6-6;Q8N4C6-7;Q8N4C6-9	0	1	0	0	0	0	0	0	0	0	0
C9J0A4;P57723;P57723-2	0	0	0	0	0	0.362687	0	0	0.637313	0	0
C9J0A7;Q9UQN3;Q9UQN3-2	0	0	0	0	0	0	1	0	0	0	0
C9J0I9;Q86WB0;Q86WB0-2;Q86WB0-3	0	1	0	0	0	0	0	0	0	0	0
C9J0J0;Q96EE4	0	0	0	0	0	0	0	0	1	0	0
C9J0J7;G5E9Q6;P35080-2	0	0	0	0	0	0	1	0	0	0	0
C9J0K6;P30626;P30626-2;P30626-3	0	0	0	0	0	0	1	0	0	0	0
C9J159;F5H6W4;Q9H992	0.358122	0	0	0	0	0	0.641878	0	0	0	0
C9J165	0.763381	0	0	0	0	0.236619	0	0	0	0	0
C9J1C6;Q9P0P0	0	0	0	0	0	0	1	0	0	0	0
C9J2C0;Q9NY65;Q9NY65-2	0	0	0	0	0	0	1	0	0	0	0
C9J2P9;Q75N03;Q75N03-2	0	1	0	0	0	0	0	0	0	0	0
C9J2Y9;P30876	0	1	0	0	0	0	0	0	0	0	0
C9J365;C9JA28;Q9UNL2;Q9UNL2-2	0	0.344878	0	0	0	0	0	0	0.215973	0	0.439149
C9J384;Q9BQ75;Q9BQ75-2	0	1	0	0	0	0	0	0	0	0	0
C9J3D7;Q9UKG9;Q9UKG9-3	0	0	0	1	0	0	0	0	0	0	0
C9J3R8;E7ETS9;O60513	0	0	0	0	0	0	0	0	1	0	0
C9J406	0	0	0	0	0	0	0	1	0	0	0
C9J494;Q9H000;Q9H000-2	0	0	0	0	0	1	0	0	0	0	0
C9J4X5;Q96EU6;Q96EU6-2;Q9H160;Q9H160-2	0	0.78254	0	0	0	0	0	0	0.21746	0	0
C9J4Z3;P61513	0	0	0	0	0.506652	0	0	0.493348	0	0	0
C9J555;J3QLM1;J3QLS1;Q14849	0	0	0	0	0	0	0	0	1	0	0
C9J597;C9JF31;Q9BV87	0	0	0.354428	0	0	0	0	0	0.645572	0	0
C9J5D1;E7EQ69;Q9GZZ1	0	0	0	0	0	1	0	0	0	0	0
C9J5N1;Q9BTE6;Q9BTE6-2;Q9BTE6-3	0	0	0	0	0	0	1	0	0	0	0
C9J6G3;C9J7M1;O95749	0	0	0	0	0	0	1	0	0	0	0
C9J6K0;Q13103	0	0	0.408922	0	0	0	0	0.591078	0	0	0
C9J6K3;C9JM54;Q9HC52	0	1	0	0	0	0	0	0	0	0	0
C9J6P4;Q7Z2W4	0	0	0	1	0	0	0	0	0	0	0
C9J6W0	0	0	0.418078	0.581922	0	0	0	0	0	0	0
C9J712;P35080	0.470023	0	0	0	0	0	0.529977	0	0	0	0
C9J758;Q969T7;Q969T7-2	0	0	0	0	0	0	1	0	0	0	0
C9J798;E5RK78;E7ERK1;F5GXT2;F8W6L0;O43374;O43374-2	0	0.622965	0	0	0	0	0	0.377035	0	0	0
C9J7E5;Q9Y5L0;Q9Y5L0-1	0	0	0	0	0	0	1	0	0	0	0
C9J7E8;Q9UL63;Q9UL63-2	0.701871	0	0	0	0	0.298129	0	0	0	0	0
C9J7K9;C9J9P4;H7C5I5;O15162;O15162-2	0	0	0	0	0.603005	0	0	0	0	0	0.396995
C9J813
C9J826	0	0	0	0	0	0.453471	0	0	0	0	0.546529
C9J8B8;Q969S8;Q969S8-2	0	0	0.474679	0	0	0	0	0	0	0	0.525321
C9J8I8;F5H364;F5H7Q6;P41221;P41221-2;Q9H1J7	0	0	0	0	0	0	0	1	0	0	0
C9J8S2;Q99969	0	0	0	0	0.707543	0	0	0	0.292457	0	0
C9J8T4;C9JYN7;O43567	0	0	0	0	0	0	0	0	0.56939	0.43061	0
C9J8W4;E9PBQ4;F5GXF0;F8W6I3;H7BZ00;P22736;P22736-2;P43354;P43354-2	0	0.207199	0.222489	0.273766	0	0	0	0	0	0	0.296546
C9J975;E7ESL9;Q96P47;Q96P47-2;Q96P47-3;Q96P47-4;Q96P47-6	0.598022	0	0.401978	0	0	0	0	0	0	0	0
C9JA08;Q96D46	0.597516	0	0	0	0	0.402484	0	0	0	0	0
C9JA90	0	0	0.463652	0	0	0	0	0	0	0	0.536348
C9JAX1;Q16595	0	0	0	0	0	0	0	1	0	0	0
C9JB28;C9JPS5;Q6ZMH5	0	0	0	0	0.618661	0	0	0	0	0	0.381339
C9JB30;Q9UPY8	0	0	0	0	0	0	1	0	0	0	0
C9JB56;H7C4P1;P42331;P42331-3;P42331-4;P42331-5;P42331-6	0	0	0	0	0	0	0	0	1	0	0
C9JBG5;E9PMC3;F5H8L4;Q8NBJ9;Q8NBJ9-2	0	0	0	0	0	0.320116	0	0	0.358267	0.321617	0
C9JBI3;P78330	0	0	0	0	0	0	1	0	0	0	0
C9JBY7;Q9Y291	0	0.257028	0	0	0	0	0	0.742972	0	0	0
C9JCC6;E9PQX9;Q14919;Q14919-2
C9JCU6;F2Z2B3;F8WCP4;Q12851;Q12851-2	0.681576	0	0	0	0	0	0	0	0.318424	0	0
C9JD37	0	0	0	0	0	0	0	1	0	0	0
C9JDZ2;Q9NVQ4;Q9NVQ4-2;Q9NVQ4-3	0	0	0.475068	0	0	0	0.524932	0	0	0	0
C9JEG3;Q9UBQ6	0	0	0	0	0	0	0	0	1	0	0
C9JEH3;C9JG97;Q13685	0	0	0	0	0	0	1	0	0	0	0
C9JEK0;C9JP86;Q08AI8	0.678154	0	0.321846	0	0	0	0	0	0	0	0
C9JER6;P61366	0.638936	0	0	0	0	0	0	0	0	0	0.361064
C9JF50;E9PLU1;E9PRK5;E9PRW1;E9PSD6;Q9H019;Q9H019-2;Q9H019-3	0	0	0	0.372119	0	0	0	0.413905	0	0	0.213975
C9JFE4;Q13098;Q13098-5;Q13098-7	0.407428	0	0	0	0	0	0.592572	0	0	0	0
C9JFR7;P99999	0	0	0	0.301775	0	0	0	0.698225	0	0	0
C9JFV4;Q8IZL8	0	1	0	0	0	0	0	0	0	0	0
C9JFX4;E9PLG6;E9PSD9;Q6IA17;Q6IA17-2	0	0	0	0	0	0.262027	0	0	0.487417	0.250556	0
C9JG87;Q9NYK5;Q9NYK5-2	0	0	0	0	0	0	0	1	0	0	0
C9JGT3;G5E9C5	0	0	0	0	0	0	0	0	0.669631	0	0.330369
C9JH00;O75155;O75155-2	1	0	0	0	0	0	0	0	0	0	0
C9JHD7;C9JJK9;Q86YP4;Q86YP4-2;Q86YP4-3	0	1	0	0	0	0	0	0	0	0	0
C9JI98	0	0	0	0	0	0	0	0	0	0	1
C9JIF9;P13798	0.350834	0	0	0	0	0	0.649166	0	0	0	0
C9JIT1	0	0	0.64841	0	0	0	0	0	0.35159	0	0
C9JIZ6;P07602;P07602-2;P07602-3	0	0	0	0	0	0	0	0	0	1	0
C9JJ19;P82930	0	0	0	0	0	0	0	1	0	0	0
C9JJM2;Q96MV1;S4R434	0	0	0.264721	0	0	0	0	0	0.422512	0	0.312767
C9JJN9;Q8N3P4;Q8N3P4-2;Q8N3P4-3	0.621653	0	0	0	0	0.378347	0	0	0	0	0
C9JJT5;G3V325;P56134-2;P56134-4	0	0	0	0	0	0	0	1	0	0	0
C9JJX6;E9PDC3;O00192;O00192-2	0	0.234379	0	0	0.378716	0	0	0	0	0	0.386904
C9JK83;O95630;O95630-2	0	0	0	0	0	0	1	0	0	0	0
C9JKL2;C9JPX5;O95772;O95772-2	0	0	0	0	0	0	0	0	1	0	0
C9JLB7;Q96HP4;U3KQU8	0	0	0	0	0	0	0	1	0	0	0
C9JLU1;P52434;P52434-4	0	0.216625	0	0	0	0	0.783375	0	0	0	0
C9JLW8;I3L2L5;I3L4Q0	0	0.427416	0.572584	0	0	0	0	0	0	0	0
C9JNE2;Q9Y530	0	0	0.357083	0	0	0	0	0	0.642917	0	0
C9JNI1
C9JNW5;C9JXB8;P83731	0	0	0	0.372719	0.408433	0	0	0.218847	0	0	0
C9JNZ0;C9JRY4;Q96IW7	0	0.434781	0	0	0	0	0	0	0.565219	0	0
C9JP16;O75718	0	0	0	0	1	0	0	0	0	0	0
C9JP85;Q16656;Q16656-2;Q16656-4	0	1	0	0	0	0	0	0	0	0	0
C9JPG5;Q13275;Q13275-2	0.380131	0	0	0	0	0	0.619869	0	0	0	0
C9JPI6	0	0	0.230164	0	0	0.38135	0	0	0.388486	0	0
C9JPQ6;Q9BYB4;Q9BYB4-2	0.648674	0	0.351326	0	0	0	0	0	0	0	0
C9JPU9;H3BS93;H3BSZ1;P05108-2	0	0	1	0	0	0	0	0	0	0	0
C9JQ41;H7C525;Q4VC31	0	0	0	0	0	0	0	1	0	0	0
C9JQ60	0.625003	0	0.374997	0	0	0	0	0	0	0	0
C9JQD4;O43447	0	1	0	0	0	0	0	0	0	0	0
C9JQH3;J3KQW6;Q86UV6;Q86UV7	0	0	0.55024	0	0	0.44976	0	0	0	0	0
C9JQI7;C9JQI7-2;D6RC30	0	0	0	0	0.397039	0	0	0	0	0.219759	0.383202
C9JQS9;E7ETT1;E7ETT4;E7EX59;E9PDR0;P05166;P05166-2	0	0	0	0	0	0	0	1	0	0	0
C9JQV0;H7C0T1;H7C2R9;Q9BRJ6	0	0	0	0	1	0	0	0	0	0	0
C9JQX2;Q86VD9	0	0	0	0	0	0	0	0	1	0	0
C9JR56	0	0	0	0	0	0	0	1	0	0	0
C9JRD2;P25686;P25686-2	0	0	0	0	0	0	1	0	0	0	0
C9JRZ6;Q9NX63	0	0	0	0	0	0	0	1	0	0	0
C9JRZ8	1	0	0	0	0	0	0	0	0	0	0
C9JS50;Q687X5	0	0	0	0.340562	0.397048	0	0	0	0	0	0.26239
C9JSU1;Q9Y608;Q9Y608-2;Q9Y608-4;Q9Y608-5
C9JUQ8	0.686365	0	0	0	0	0.313635	0	0	0	0	0
C9JW74;C9JWU9;Q5EB52;Q5EB52-2;Q5EB52-3	0	0	0	0	0	0	0	1	0	0	0
C9JXB2;Q9NS98	0	0	0	0	0	0	0	0	0.593243	0	0.406757
C9JXF9;P08833	0	0	0	0	0	0	0	0	0.531438	0.468562	0
C9JXM5;G5E9W1;Q7Z3E1
C9JY79;M0QZQ3;Q9H254;Q9H254-4	0	0	0	0	0	0	0	1	0	0	0
C9JYJ6;Q4L180-3;Q4L180-5;Q4L180-7	0	0	0	0	0	0	0	1	0	0	0
C9JYM0;O75817	0	1	0	0	0	0	0	0	0	0	0
C9JYS5;J3KS67;J3QL47;J3QL63;K7ENL4;Q96ET8-3;Q9NYZ1	0	0	0	0	0	0	0	0	1	0	0
C9JZ38	0	0	1	0	0	0	0	0	0	0	0
C9JZB3;Q16821	0	0	0	0	0	0	0	0.493671	0	0	0.506329
C9JZF7;G5E9W2;Q9P2E5;Q9P2E5-2	0	0	0	0	0	0	0	0	1	0	0
C9JZG9;C9JZY6;P62256	0	0	0	0	0	0	1	0	0	0	0
C9JZI1;P35249;P35249-2	0	1	0	0	0	0	0	0	0	0	0
C9JZI7	0	0	0	0	0	0	1	0	0	0	0
C9JZR2;O60716;O60716-10;O60716-11;O60716-13;O60716-2;O60716-3;O60716-5;O60716-9	0	0.22029	0	0	0.34238	0	0	0	0	0	0.437331
C9K058;Q9H2H8	0	0	0	0	0	0	1	0	0	0	0
C9K0C8;Q9NS00;Q9NS00-2	0	0	0	0	0	0	0	0	1	0	0
C9K0E5	0	1	0	0	0	0	0	0	0	0	0
C9K0I9	0	0	0	0.378124	0	0	0	0	0	0	0.621876
D1MQ08;M0R1J0;O15554	0	0	1	0	0	0	0	0	0	0	0
D3DQV9;H0Y3P2;P78344;P78344-2
D3DRR9;Q86WR7;Q86WR7-2	0	0	0.301162	0	0	0	0	0	0	0	0.698838
D3DUJ3;K7EIE9;K7EQG9;P17706;P17706-2;P17706-3;P17706-4	0	0	0	0	0.40268	0	0	0	0.237646	0	0.359674
D3DWX8;P98173;P98173-2;P98173-3;Q5HY75	0	0	0	0	0	0	0	0	1	0	0
D3K2X1	0	0	0	0	0	0	0	0	0.630979	0.369021	0
D3YTA9;F6U1T9;P63098	0	0	0	0	0	0	1	0	0	0	0
D3YTC7;Q9UBM1;Q9UBM1-2;Q9UBM1-3	0	0	0.505962	0	0	0	0	0	0.494038	0	0
D5H3J5;Q2L6G2	0	0	0	0.346087	0	0	0	0.293378	0	0	0.360534
D6R927;D6R946;D6R9K5;D6R9X3;D6RA45;D6RAT2;D6RB37;D6RBQ8;D6RCM1;D6REC2;D6REP3;D6RF98;D6RIV8;D6RIZ8;Q06330;Q06330-4;Q06330-5;Q06330-6;Q06330-7	0	1	0	0	0	0	0	0	0	0	0
D6R938;Q13557;Q13557-10;Q13557-11;Q13557-12;Q13557-3;Q13557-4;Q13557-5;Q13557-6;Q13557-8;Q13557-9
D6R9C7	0	0	0.385172	0	0	0	0	0	0.614828	0	0
D6R9P3	0	1	0	0	0	0	0	0	0	0	0
D6R9P8;Q6AWC2;Q6AWC2-4;Q6AWC2-6	0.644497	0	0	0	0	0.355503	0	0	0	0	0
D6R9R5	0	0	0.560476	0	0	0	0	0	0.439524	0	0
D6R9S2;D6RIC1;H0Y8L2;H0YEZ3;H0YJP6;P59282	0	0	1	0	0	0	0	0	0	0	0
D6R9S7;D6RDB0;D6RHE3;Q96GZ6;Q96GZ6-2;Q96GZ6-5;Q96GZ6-6;Q96GZ6-7;Q96GZ6-9	0	0	0	0	0.496394	0	0	0	0.221444	0	0.282162
D6R9Z7;P15954	0	0	0	0	0	0	0	1	0	0	0
D6RA25	0	0	1	0	0	0	0	0	0	0	0
D6RA47;D6RE79;D6RIZ4;Q14728	0	0	0	0	0	0	0	0	0	0	1
D6RA57;D6RC31;D6RE67;H0Y9X1;Q96EY4	0	1	0	0	0	0	0	0	0	0	0
D6RA82;P12429	0	0	0	0	0	0	1	0	0	0	0
D6RA96;Q9NZ71;Q9NZ71-2;Q9NZ71-4;Q9NZ71-6;Q9NZ71-7;Q9NZ71-8;X6R5I7	0	0.593218	0	0	0	0	0	0	0.406782	0	0
D6RAD4;P50613	0	1	0	0	0	0	0	0	0	0	0
D6RAD5	0	0	0	0	0	0	0	1	0	0	0
D6RAJ6;Q9UKT5;Q9UKT5-2	0	0	0.450916	0	0	0	0	0	0.549084	0	0
D6RAN1;D6RF83;D6RH06;H7BYK4;Q9NR12;Q9NR12-2;Q9NR12-3;Q9NR12-4;Q9NR12-5;Q9NR12-6	0	0	0	0.482376	0	0	0	0.517624	0	0	0
D6RAN8;H7C5U8;Q9P0M9	0	0	0	0	0	0	0	1	0	0	0
D6RAR4;Q04756	0	0	0	0	0	0	0	0	1	0	0
D6RAZ0;E9PD12;F2Z2L2;H0YAM8;Q96AX9;Q96AX9-11;Q96AX9-13;Q96AX9-14;Q96AX9-2;Q96AX9-3;Q96AX9-5;Q96AX9-6;Q96AX9-7;Q96AX9-8	0	0.448933	0	0	0	0	0	0.551067	0	0	0
D6RAZ3;E7EMP6;Q96FZ2
D6RB81;Q9UHK6;Q9UHK6-5	0	0	0	0.579805	0	0	0	0.420195	0	0	0
D6RB89;P50120	0	0	0	0	0	0	1	0	0	0	0
D6RBM8	0	0	1	0	0	0	0	0	0	0	0
D6RBN6	0	0	0.429587	0	0	0	0	0	0.312003	0.25841	0
D6RBR7;Q9Y3S2	0.711232	0	0	0	0	0.288768	0	0	0	0	0
D6RBW1;P06730;P06730-2;P06730-3	0	0	0	0	0	0	1	0	0	0	0
D6RBY0;D6RJG8;Q8TAC1;Q8TAC1-2	0	0	1	0	0	0	0	0	0	0	0
D6RC47;D6REW1;Q9Y255;Q9Y255-2	0	0	0	0	0	0	0	1	0	0	0
D6RCC4;D6RCC9;Q8NEC7	0	0	0.229797	0	0	0	0.770203	0	0	0	0
D6RCE7	0	1	0	0	0	0	0	0	0	0	0
D6RCM8;O95379;O95379-2;O95379-3;O95379-4	0	0	0.348704	0	0	0	0.651296	0	0	0	0
D6RCP5;Q8N264;Q8N264-2;Q8N264-3	0	0	0	0	0	0	0	1	0	0	0
D6RDG3	0	0	0	0	0.562068	0	0	0	0	0	0.437932
D6RDG8;D6RGZ4;O43791
D6RDK6	0	0	0.302581	0.262829	0	0	0	0.43459	0	0	0
D6RE84
D6REA0;O75879	0	0	0	0	0	0	0	1	0	0	0
D6REK2;H0Y9T3;Q8WV44;Q8WV44-2;Q8WV44-4	0	0.57224	0	0	0	0	0	0	0.42776	0	0
D6RER5;D6RGI3;Q9NVA2	0	0	0	1	0	0	0	0	0	0	0
D6REX3	0.686968	0	0	0	0	0.313032	0	0	0	0	0
D6REY2;P23508;P23508-2	0	0	0	0	0	0	1	0	0	0	0
D6RF35;P02774;P02774-3	0	0	0	0	0	0	0	0	0	1	0
D6RF43	0	0.387383	0.612617	0	0	0	0	0	0	0	0
D6RF44	0	0.467509	0	0	0	0	0	0	0.532491	0	0
D6RF47;D6RF94;Q9H1J5;Q9H1J5-2	0	0	0	0	0	0	0	1	0	0	0
D6RF48;Q9P2W9	0	0	0	0	1	0	0	0	0	0	0
D6RF86;P55285;P55285-2	0	0	0	0	0	0	0	0	1	0	0
D6RFG8;P27707	0	1	0	0	0	0	0	0	0	0	0
D6RFI1	0	0.384894	0	0	0	0	0	0	0.615106	0	0
D6RFI3;E7EQR8;Q9GZM5	0	0	0	0	0	0.306252	0	0	0.693748	0	0
D6RGG3;Q99715;Q99715-4	0	0.769203	0	0	0	0	0	0	0	0	0.230797
D6RGK3;D6RHW1;D6RIE8;D6RIV9;D6RIY1;Q16594;Q9HBM6	0	1	0	0	0	0	0	0	0	0	0
D6RGK9;H0Y9C1;H0Y9Z5;Q96LI5
D6RGZ3;Q8N1W1;Q8N1W1-3;Q8N1W1-4;Q8N1W1-5;Q8N1W1-6	0	0	0.516697	0	0	0	0	0.483303	0	0	0
D6RH21	0	1	0	0	0	0	0	0	0	0	0
D6RHG0;P78383	0	0	0	0	0	0	0	0	0	1	0
D6RHH9;Q8TCT1;Q8TCT1-2;Q8TCT1-3	0	0	0	0	0	0	1	0	0	0	0
D6RHX8;F8W9W2;P43250;P43250-2;P43250-3	0	0.20671	0	0	0.4434	0	0	0	0	0	0.34989
D6RIA8	0	0	0	0	0	0.278525	0	0	0.721475	0	0
D6RID8;Q13888;Q6P1K8	0	1	0	0	0	0	0	0	0	0	0
D6RIE3	0	0	0	0	0	0	0	1	0	0	0
D6RIG4;Q9HCL0;Q9HCL0-2	0	0	0	1	0	0	0	0	0	0	0
D6RIT3;Q8N1A6	0	0	0	0	0	0	1	0	0	0	0
D6RIY6;Q06265;Q06265-2	0	1	0	0	0	0	0	0	0	0	0
D6RJ90;Q9Y6G5	0	0	0	0	0	0.293577	0	0	0.320936	0.385487	0
D6RJG9;Q9Y5W7;Q9Y5W7-2;Q9Y5W7-3;Q9Y5W7-4	0	0	0	0	1	0	0	0	0	0	0
D6W5U7;Q8TBR4;Q9UJ98;Q9UJ98-2;Q9UJ98-3	0	0	1	0	0	0	0	0	0	0	0
E0CX11
E1CKY7;O60237;O60237-4;O60237-6	0	0	0	0	0	0	0	1	0	0	0
E2QRG8	0	0	0	0	0	0.496751	0	0	0.503249	0	0
E2QRK7;Q5JTD0;Q5JTD0-2
E3W980;E3W982;Q8TDG4	0	0	1	0	0	0	0	0	0	0	0
E5KLJ9;O60313-10;O60313-2;O60313-9	0	0	0	0	0	0	0	1	0	0	0
E5RFE0;E5RGT8;Q9UQ10	0	0	0	0	0	0	1	0	0	0	0
E5RFF8;J3KNU2;Q8IX29;Q8IX29-2	0	0	0	0	0	0	0	1	0	0	0
E5RFP0	0	0	0	0	0	0	0	0	1	0	0
E5RFT4;Q8N4L2	0	0	0	0	0	0.504564	0	0	0	0.495436	0
E5RFV7;O00300	0	0.378263	0	0	0	0	0	0.621737	0	0	0
E5RG15;E5RHB3;Q8NBP0;Q8NBP0-2	0	0.601005	0	0.398995	0	0	0	0	0	0	0
E5RG17;G5EA19;H0YBX2;Q6P1N9;U3KQS5	0	0	0	0	0	0	1	0	0	0	0
E5RG29	0	0	0	0	0.716004	0	0	0	0	0	0.283996
E5RG44;E5RGJ1;E5RIT1;Q629K1	0	0	0	0	0.61478	0	0	0.38522	0	0	0
E5RGB7;E5RGH1;H0YBV9;Q7Z388	0	0	0.172453	0	0.393706	0	0	0	0.186885	0	0.246956
E5RGT2	0	0	0	0	0	0	0	1	0	0	0
E5RGU4	0	0.693587	0	0	0	0	0	0.306413	0	0	0
E5RGZ2;H0YKJ1;Q6NT76;Q6NT76-2;Q6NT76-3;Q6NT76-5	0	0.337791	0	0.321742	0	0	0	0	0	0	0.340467
E5RHC5;Q8N6T3;Q8N6T3-3	0	0	1	0	0	0	0	0	0	0	0
E5RHG8;Q15369	0	0	0	0	0	0	1	0	0	0	0
E5RHG9	0	0	0	0	0	0	0	1	0	0	0
E5RHW4;O94905	0	0	0	0	1	0	0	0	0	0	0
E5RIA2;E7EUF1;Q13822;Q13822-2;Q13822-3	0	0	0.358111	0	0	0.321252	0	0	0	0	0.320637
E5RIA9;Q9UJ68;Q9UJ68-5	0	0	0	0	0	0	1	0	0	0	0
E5RIH5;Q6NXR4	0.526149	0	0	0	0	0.293316	0	0	0.180536	0	0
E5RIK6	0	0.252864	0	0	0	0	0	0	0.747136	0	0
E5RIT6;Q9UNX3	0	0	0	0	0.579609	0	0	0.420391	0	0	0
E5RIW3;E5RJD8;O75347	0	0	0	0	0	0	1	0	0	0	0
E5RIW9;P28328	0	0	0	0.651618	0	0	0	0	0	0	0.348382
E5RJ29;Q9NYI0;Q9NYI0-2	0	0	0	0	0	0	0	0	0	0	1
E5RJ36;H0YAX6;Q14CS0	0.359675	0	0	0	0	0	0.640325	0	0	0	0
E5RJF8;E5RK82;O15182	0	1	0	0	0	0	0	0	0	0	0
E5RJM6;E5RJM6-2;E5RJM6-3	0	0	0.32787	0	0	0.326971	0	0	0.345159	0	0
E5RJN7;E7EPX0;E7EVI1;E7EVJ4;Q9NUL3;Q9NUL3-2;Q9NUL3-3;Q9NUL3-6;Q9NUL3-7;Q9NUL3-8	0	0	0	0.374403	0.625597	0	0	0	0	0	0
E5RK69	0	0	1	0	0	0	0	0	0	0	0
E7EM64;Q7L5N1	0.327882	0	0	0	0	0	0.672118	0	0	0	0
E7EM72;E7EWQ4;O75912
E7EMB1;Q9UH65	0	0	0	0	0	0	1	0	0	0	0
E7EMC7;Q13501	0	1	0	0	0	0	0	0	0	0	0
E7EMD6;O43572	1	0	0	0	0	0	0	0	0	0	0
E7EMK3;J3QLD9;Q14254	0	0.243624	0	0	0.402686	0	0	0	0	0	0.35369
E7EMS2;G3V3D1;G3V3E8;J3KMY5;P61916	0	0	0	0	0	0	0	0	0.401175	0.598825	0
E7EMT5;P04798	0	0	0	0	0.524368	0	0	0	0.202768	0	0.272865
E7EMT6;E7ENY2;E7EQA9;E7EV32;E7EVA2;E7EW82;H7C3L4;Q92844
E7EMZ9;E9PBC6;O95359;O95359-3	0	0	0	0	0	0	1	0	0	0	0
E7EN24;Q12864	0	0	0.285592	0	0	0	0	0	0.324308	0	0.3901
E7EN73;Q8IZA0;Q8IZA0-2	0	0	0	0	0	0	0	0	0.641784	0.358216	0
E7EN91;Q9BWF2	1	0	0	0	0	0	0	0	0	0	0
E7END6;P04070;P04070-2	0	0	0	0	1	0	0	0	0	0	0
E7ENL6;P12111;P12111-2;P12111-4	0	0.538515	0	0	0	0	0	0.461485	0	0	0
E7ENT5;E7EV45;Q9ULF5	0	0	0	0	0	0	0	0	0	0.367069	0.632931
E7ENV7	0	0	0	0	0.563672	0	0	0	0	0	0.436328
E7ENY0;E7EV99;P35611;P35611-2;P35611-3;P35611-6	0	0	0	1	0	0	0	0	0	0	0
E7EP17;Q9NYC9;Q9NYC9-2	0	0	0	0	0	0	1	0	0	0	0
E7EP72;Q9UFG5	0	0	0	0	0	0	0	0	0	1	0
E7EPB3;P50914	0	0	0	0.356695	0.643305	0	0	0	0	0	0
E7EPG1;Q13201	0	0	0	0	0	0	0	0.373503	0	0	0.626497
E7EPI0;Q9P2D0	0	0	0	0	1	0	0	0	0	0	0
E7EPK1;E7ES33;Q16181;Q16181-2	0	0	0	1	0	0	0	0	0	0	0
E7EPN9;Q9Y520;Q9Y520-4;Q9Y520-5;Q9Y520-6;Q9Y520-7
E7EPS8;P28827;P28827-2	0	0	0	0	0	0	0	0	0	0	1
E7EPT4;P19404	0	0	0	0	0	0	0	1	0	0	0
E7EQB2;E7ER44;P02788;P02788-2	0	0.262742	0	0.421497	0	0	0	0	0	0	0.315762
E7EQH1;E9PMB7;E9PR55;Q8NFJ9;Q8NFJ9-2;Q8NFJ9-3	0	0	0.202259	0	0	0	0	0.797741	0	0	0
E7EQM8;J3QRM6;J3QS93;P43146	0.596809	0	0	0	0	0.403191	0	0	0	0	0
E7EQQ5;Q9C035;Q9C035-2;Q9C035-3;Q9C035-4;Q9C035-5;Q9C035-6	1	0	0	0	0	0	0	0	0	0	0
E7EQT3;Q9BY07-5	0	0	0	0	0	0	1	0	0	0	0
E7EQT4;Q9UKV3;S4R3H4	0	1	0	0	0	0	0	0	0	0	0
E7EQU1;E7ES08;E9PES6;O15347	0	1	0	0	0	0	0	0	0	0	0
E7EQY1;Q96C01	0	0	0	0	0	0	0	1	0	0	0
E7ER45;O43451	0	0	0	0	0	0	0	0	0	0	1
E7ER77;Q7Z2K6	0	0	0	0.472837	0.527163	0	0	0	0	0	0
E7ERI8;E7EW49;O75122-3	0	0	0	0	0	0	1	0	0	0	0
E7ERS3;Q86VM9	0	0.47072	0	0	0	0	0	0.52928	0	0	0
E7ES96;P49768;P49768-2
E7ESA6;H0YBP1;Q05397;Q05397-7
E7ESA7;P29474	0	0	0	0	0.421644	0	0	0	0	0	0.578356
E7ESC6;Q9UIA9	0.339567	0	0	0	0	0	0.660433	0	0	0	0
E7ESD2;Q641Q2;Q641Q2-2	0	0	0	0	0	0	0	0	0	1	0
E7ESF6;Q13094	0	0.482409	0	0	0	0	0	0.517591	0	0	0
E7ESK6;E9PBI9;P34741	0	0	0	0	0	0	0	0	0.351824	0.312856	0.33532
E7ESL0;J3KQY1;Q9NWU5;Q9NWU5-2;Q9NWU5-3	0	0	0	0	0	0	0	1	0	0	0
E7ESP4;P17301	0	0	0	0	0.334395	0	0	0	0.413101	0	0.252505
E7ESS3;K7EKW3;Q71RG4;Q71RG4-2	0	0	0	0	0.75387	0	0	0	0	0	0.24613
E7ESU7	0	0	1	0	0	0	0	0	0	0	0
E7ESY4;H0Y4T7;Q13330;Q13330-3	0	1	0	0	0	0	0	0	0	0	0
E7ET49;Q8NCG7;Q8NCG7-2;Q8NCG7-4	0	0	0	0	0	0.471567	0	0	0.528433	0	0
E7ET87;E7EVI4;O75410;O75410-10;O75410-2;O75410-3;O75410-4;O75410-5;O75410-6;O75410-7;O75410-9
E7ETB3	1	0	0	0	0	0	0	0	0	0	0
E7ETH0;G3XAM2;P05156	0	0	0	0	1	0	0	0	0	0	0
E7ETM6;Q8N2H4	0	0	0	0	0	0	0	0	1	0	0
E7ETU5;F6Y5H0;P29558;P29558-2
E7ETU7;H0Y9G6;P09001	0	0	0	0	0	0	0	1	0	0	0
E7ETY4;E9PC69;Q7KZI7;Q7KZI7-10;Q7KZI7-11;Q7KZI7-12;Q7KZI7-13;Q7KZI7-14;Q7KZI7-15;Q7KZI7-16;Q7KZI7-2;Q7KZI7-3;Q7KZI7-4;Q7KZI7-5;Q7KZI7-6;Q7KZI7-7;Q7KZI7-8;Q7KZI7-9
E7ETZ4;Q9Y6E2
E7EU04;F5GXV3;F5GZ45;F5H3Z4;F5H4Z6;J3KQP4;J3KR13;P14207	0	0	0	0	0.58747	0	0	0	0	0	0.41253
E7EU05;E9PLT1;P16671;P16671-3	0	0	0	0	0.497006	0	0	0	0	0	0.502994
E7EU13;Q96P48;Q96P48-1;Q96P48-2;Q96P48-3;Q96P48-4	0.364659	0	0	0	0	0	0.635341	0	0	0	0
E7EU14	0.331329	0	0	0	0	0	0.668671	0	0	0	0
E7EU40;Q92959	0	0	0.259608	0	0	0	0	0	0	0	0.740392
E7EUH7;Q96PZ0;Q96PZ0-2	0	0	0	0	0	0	1	0	0	0	0
E7EUJ7;Q8TC20;Q8TC20-2;Q8TC20-3;Q8TC20-5	0	1	0	0	0	0	0	0	0	0	0
E7EUU4;Q04637-8
E7EUW0;H0YA74;Q9C0I3;Q9C0I3-2	0	0	0.405321	0	0	0	0	0	0.594679	0	0
E7EV01;O15484	0	0.429214	0	0	0	0	0	0	0	0	0.570786
E7EV71;Q14766;Q14766-2;Q14766-4;Q14766-5	0	0.421209	0	0	0	0	0	0.345108	0	0	0.233683
E7EVA0
E7EVC7;Q676U5;Q676U5-2	0	0	0	0	0	0	1	0	0	0	0
E7EVE9;P18074	0	0	0.571325	0	0	0	0	0.428675	0	0	0
E7EVH7;F8W6L3;G3V2E7;G3V3H3;G3V5R9;Q07866;Q07866-10;Q07866-2;Q07866-3;Q07866-4;Q07866-5;Q07866-6;Q07866-7;Q07866-8;Q07866-9	0	0	0	0	0	0	1	0	0	0	0
E7EVJ5;Q96F07;Q96F07-2	0	0	0	0	0	0	0	0	0.595386	0.404614	0
E7EVQ6;Q14534	0	0	0.45935	0	0.54065	0	0	0	0	0	0
E7EVX8;Q8WWY3	0	1	0	0	0	0	0	0	0	0	0
E7EW05;Q9NVU7;Q9NVU7-2	0	1	0	0	0	0	0	0	0	0	0
E7EWD3;O75077;O75077-2	0	0	0	0	0.629977	0	0	0	0	0	0.370023
E7EWM1;Q15596	0	0	0	0	0	0	0	0	1	0	0
E7EWP0;H0Y886;O43674;O43674-2	0	0	0	0	0	0	0	1	0	0	0
E7EWR4;P33240;P33240-2	0	1	0	0	0	0	0	0	0	0	0
E7EWW0;Q7Z3J2	0	0	0	0	0	1	0	0	0	0	0
E7EWX8	0	0	0	0	0	0	0	0	1	0	0
E7EX17;P23588	1	0	0	0	0	0	0	0	0	0	0
E7EX40;Q6WKZ4;Q6WKZ4-2;Q6WKZ4-3	0	0	0	0	0	0.465449	0	0	0.534551	0	0
E7EX44;Q05682-2;Q05682-3;Q05682-6	0	0	0	1	0	0	0	0	0	0	0
E7EX54	0	1	0	0	0	0	0	0	0	0	0
E7EX70;Q9GZS1	0	1	0	0	0	0	0	0	0	0	0
E7EX90;Q14203;Q14203-3;Q14203-4;Q14203-6	0.727421	0	0	0	0	0.272579	0	0	0	0	0
E9PAM5	0	0	0.421799	0.578201	0	0	0	0	0	0	0
E9PAV3;E9PAV3-2;F8VZJ2;F8W0W4;H0YHX9;Q13765	0	0	0	0	0	0	0	0	0	1	0
E9PB18;Q6UXG2;Q6UXG2-2;Q6UXG2-3;Q6UXG2-4	0	0	1	0	0	0	0	0	0	0	0
E9PB51;Q9BWF3	0	1	0	0	0	0	0	0	0	0	0
E9PB61;Q86V81	0	1	0	0	0	0	0	0	0	0	0
E9PB90;P52789	0.73005	0	0.26995	0	0	0	0	0	0	0	0
E9PBC1;F6PQP6;I3L2B2;I3L2H1;I3L356;O95208;O95208-2;O95208-3;O95208-5	0	0	0	0	0.452769	0	0	0	0	0	0.547231
E9PBF9;H7C2N6;P15336	0.594601	0	0.405399	0	0	0	0	0	0	0	0
E9PBP6	0	0	0	0	0	0	0	0	0	0	1
E9PBZ2;P15428;P15428-2;P15428-4	0	0	0	0	0	0	1	0	0	0	0
E9PC53;H7C3N0;Q8TBK2;Q8TBK2-2	1	0	0	0	0	0	0	0	0	0	0
E9PC54;Q03113;Q03113-2;Q03113-3	0	0	0	0	0	0	0	0	1	0	0
E9PC61;G4U4J3;Q8NDF8;Q8NDF8-2;Q8NDF8-3;Q8NDF8-5	0	0.312052	0	0	0	0	0	0	0	0.311159	0.376789
E9PC66;P17029	0	0	0	0	0	0.240562	0	0	0.759438	0	0
E9PC87;O94876;O94876-2	0	0	0	0	1	0	0	0	0	0	0
E9PC90;H0YA62;P14635;P14635-2	0	0	0	0	0	0	0	0	0	0	1
E9PCD7;H0YA68;Q9Y2E5;Q9Y2E5-2	0	0	0	0	0	0	0	0	0	1	0
E9PCJ7;G3V336;Q8N806	0	0	0	0	0	0	0	1	0	0	0
E9PCN2;Q02153;Q02153-2	0	0	0	0	0	0	1	0	0	0	0
E9PCP0;F5H0S8;F5H100;F5H8J8;P16520;P16520-2	0	0	0.152585	0.272576	0.34389	0	0	0	0	0	0.230949
E9PCQ7;F8WD67;F8WD87;O43709;O43709-2;O43709-3	0	0	0	0	0	0	0	0	0.604571	0	0.395429
E9PCW1;G5E9T8;K7EJC8;O95249	0	0	0	0	0	0	0	0	0.686515	0.313485	0
E9PCX2;P15121	0	0	0	0	0	0	1	0	0	0	0
E9PCX5	0	0	0	0	0	0	0	0	1	0	0
E9PD50;Q92540;Q92540-2;Q92540-4	0	0	0	0	0	1	0	0	0	0	0
E9PD53;Q9NTJ3;Q9NTJ3-2	0	0	0	0.417671	0	0	0	0.582329	0	0	0
E9PD68;Q14194;Q14194-2	0	0	0.390455	0	0	0	0	0	0.609545	0	0
E9PDE8	0	0	0.38237	0.61763	0	0	0	0	0	0	0
E9PDN4	0	0	1	0	0	0	0	0	0	0	0
E9PE17;I3L0E3;Q9Y2R5	0	0	0	0	0	0	0	1	0	0	0
E9PEF1;O00408;O00408-3;O00408-4	0	0	0	0	0	0	1	0	0	0	0
E9PEJ6;H0Y547;P98196	0	0	0	0	0.528397	0	0	0	0	0	0.471603
E9PEP6;O14786	0	0	0	0	0.538839	0	0	0	0	0	0.461161
E9PEP7;P08048;P08048-2;P08048-3;P17010;P17010-2;P17010-3	0	1	0	0	0	0	0	0	0	0	0
E9PEQ6	0	1	0	0	0	0	0	0	0	0	0
E9PER6;O15530;O15530-2;O15530-3	0	0	0	0	0	0	1	0	0	0	0
E9PEW8	0	0.410363	0.242	0	0	0	0	0.347636	0	0	0
E9PEX6;P09622	0	0	0	0	0	0	0	1	0	0	0
E9PF10;O75694	0	1	0	0	0	0	0	0	0	0	0
E9PF16;Q96CM8;Q96CM8-2;Q96CM8-3	0	0	0	0	0	0	0	1	0	0	0
E9PF19;Q96E41;Q9Y4P3	0	0	0	0	0	0	0	1	0	0	0
E9PFF8	0	0	0	0.547993	0	0	0	0	0.452007	0	0
E9PFK5;P78316;P78316-2	0	1	0	0	0	0	0	0	0	0	0
E9PFK9;Q9UJ41;Q9UJ41-3;Q9UJ41-4	0	0	0	0	0	0	1	0	0	0	0
E9PFR3;Q14738;Q14738-2;Q14738-3	0.338588	0	0	0	0	0	0.661412	0	0	0	0
E9PFR9;J3KQJ8;Q96N96;Q96N96-2;Q96N96-3;Q96N96-5;Q96N96-6	0	0	0	0	0	0	0	1	0	0	0
E9PG19;O94868;O94868-2
E9PG32;Q6ZR08	0	0	1	0	0	0	0	0	0	0	0
E9PG40;P05067;P05067-11;P05067-7;P05067-8;P05067-9	0	0	0	0	0.42393	0	0	0	0.273867	0.302202	0
E9PG71;P54764;P54764-2	0	0.720366	0.279634	0	0	0	0	0	0	0	0
E9PG73;Q13427	0	1	0	0	0	0	0	0	0	0	0
E9PGC0;P20936;P20936-2;P20936-4	0	0	0	0	0	0	1	0	0	0	0
E9PGM7;O94988;O94988-1;O94988-3;O94988-5;O94988-6	0	0	0	0	0	0	1	0	0	0	0
E9PGQ0;Q96H78	0	0	0	0	0	0	0	1	0	0	0
E9PGT3;Q15418;Q15418-2;Q15418-4	0	0	0	0	0	0	1	0	0	0	0
E9PGT6;Q99627	0	0	0	0	0	0	1	0	0	0	0
E9PHI4;O94901-9	0	0.331324	0	0	0	0	0	0.343694	0	0	0.324982
E9PHR9;Q9NRQ2;Q9NRQ2-2	0	0.34306	0	0	0	0	0	0	0.65694	0	0
E9PHT3;Q8IYS0;Q8IYS0-2	0	0	0	0	0.644785	0	0	0	0	0	0.355215
E9PHV5;P28290	0	0.539574	0	0.460426	0	0	0	0	0	0	0
E9PHX8;H7C3L9;Q12866	0	0	0.180034	0	0.447569	0	0	0	0	0	0.372398
E9PHY5;O43491-4	0	0	0	1	0	0	0	0	0	0	0
E9PHY8;Q8NDA8	0.576896	0	0	0	0	0.423104	0	0	0	0	0
E9PI41	0	1	0	0	0	0	0	0	0	0	0
E9PIC5;Q8N4M1-4;Q8N4M1-5;Q8N4M1-6
E9PIE3;Q969G5	0	0	0	0	0	0	0	0	0	0.347795	0.652205
E9PIF4;Q99519	0	0	0	0	0.642516	0	0	0	0	0.357484	0
E9PIG5;O00212	0	1	0	0	0	0	0	0	0	0	0
E9PIH9;F8WA39;H0YDX3;Q13613;Q13613-2;Q8NEC6	0	0	0.308982	0	0.691018	0	0	0	0	0	0
E9PIZ1	0	0	0	0	0	0	1	0	0	0	0
E9PIZ2;H0YDB8;Q8N3Y3	0	0	0	0	0	0.46225	0	0	0	0	0.53775
E9PJ20;E9PLF3;Q3MIX3	0	0.239115	0	0	0	0	0	0.760885	0	0	0
E9PJ55;Q9NUJ3	0	0	0	0	0	0	1	0	0	0	0
E9PJE4;Q9GZQ3	0	0	0	0	0	0	0	0	1	0	0
E9PJI1;Q92993;Q92993-2;Q92993-3;Q92993-4	0	1	0	0	0	0	0	0	0	0	0
E9PJJ5;E9PK99;E9PMS5;E9PRT1;Q4G0X4	0	0	0	0	0	0	1	0	0	0	0
E9PJN9	0	0	0	1	0	0	0	0	0	0	0
E9PJQ3;Q8N413;Q8N413-4	0	0	0	0	0	0	0	1	0	0	0
E9PJW8;E9PQA6;Q96EY5;Q96EY5-2;Q96EY5-3	0.425065	0	0	0	0	0	0.574935	0	0	0	0
E9PK14	0	0	0	0	0	0.272896	0	0	0.727104	0	0
E9PK25;G3V1A4;P23528	0	0	0	0	0	0	1	0	0	0	0
E9PK67;E9PNI7;Q53GL7	0	0	0	0	0	0	1	0	0	0	0
E9PK91;Q9NYF8;Q9NYF8-2;Q9NYF8-3	0	0.644185	0	0	0	0	0	0.355815	0	0	0
E9PKA8;E9PQL5;E9PSC8;Q6ZUT1;Q6ZUT1-2;Q6ZUT1-3	0	0.407191	0	0	0	0	0	0	0.31574	0	0.277069
E9PKC0;Q6IQ23;Q6IQ23-2	0	0.477778	0	0	0	0	0	0	0	0	0.522222
E9PKE9;G3V148;Q9H920;Q9H920-2	0	0	0	0	1	0	0	0	0	0	0
E9PKF6;H7BXH2;Q5H9R7;Q5H9R7-2;Q5H9R7-5;Q5H9R7-6	0	0	0	0	0	0	1	0	0	0	0
E9PKG1;Q99873;Q99873-2;Q99873-3	1	0	0	0	0	0	0	0	0	0	0
E9PKN0;E9PQ01;O94913	0	0.622164	0	0	0	0	0	0	0	0	0.377836
E9PKP7;P17480-2	0	1	0	0	0	0	0	0	0	0	0
E9PKP8;E9PS00;H0YCN1;H0YED5;Q9Y5Q0	0	0	0	0	0.450874	0	0	0	0.284167	0	0.264959
E9PKS9;E9PQE8;Q9Y296;Q9Y296-2	0.620979	0	0	0	0	0.379021	0	0	0	0	0
E9PKT4;Q8N131;Q8N131-2	0	0	0	0	0	0	0	0	1	0	0
E9PKT9;O96033	0	0	0	0	0	0	1	0	0	0	0
E9PKW7	1	0	0	0	0	0	0	0	0	0	0
E9PL17;Q92989;Q92989-2	0	0.58309	0	0	0	0.41691	0	0	0	0	0
E9PL57	0	0	0	0	0	0	1	0	0	0	0
E9PLD0;Q9H0U4	0	0	0	0	0	0.247091	0	0	0.752909	0	0
E9PLI6;E9PNH5;E9PS76;Q8N9N8	0	0	0	0	0	0.302812	0	0	0.697188	0	0
E9PLK3;P55786	0	0	0	0	0	0	1	0	0	0	0
E9PLN8;F8W9H0;I3L3B4;Q9BQB6;Q9BQB6-2;Q9BQB6-3	0	0	0.194407	0.348072	0.457522	0	0	0	0	0	0
E9PLP8;Q12996	0	1	0	0	0	0	0	0	0	0	0
E9PLS0;E9PNU3;E9PPL0;E9PQC8;E9PR23;E9PRA4;Q71H61	0	0.406003	0	0	0	0	0	0.593997	0	0	0
E9PLY5	0	0	0	0	0	0	1	0	0	0	0
E9PM19;P29597	0	0	0.430806	0	0	0	0	0	0	0	0.569194
E9PM62;Q5T9L3;Q5T9L3-2	0	0.314917	0	0	0.437122	0	0	0	0	0	0.247961
E9PM75;Q9NTG7	0	0	0	0	0	0	0	1	0	0	0
E9PM90;Q9UK41;Q9UK41-2	0	0	0	0	0	0	1	0	0	0	0
E9PMB9;Q16798	0	0.468442	0	0	0	0	0	0.531558	0	0	0
E9PMG5	0	0	0	0	0	0	0	1	0	0	0
E9PMI6;J3KN38;P54105	0	0	0	0	0	0	1	0	0	0	0
E9PMJ1;E9PS06;Q15771	0	0	0.357178	0	0.642822	0	0	0	0	0	0
E9PMJ5	0	0	0	0	0	0	0	1	0	0	0
E9PMQ6;Q00613;Q00613-2	0	0	0.37792	0	0	0	0.62208	0	0	0	0
E9PMR4;K4DIA7;P48509	0	0	0	0.289372	0.355044	0	0	0	0	0	0.355584
E9PMS6	0	0	0	0.324035	0	0	0	0.357614	0	0	0.318352
E9PN76;Q8ND24;Q8ND24-2
E9PN78;Q4KMG0;Q4KMG0-2	0.498138	0	0	0	0	0	0	0	0.501862	0	0
E9PN89	0	0	0	0	0	0	0	0	1	0	0
E9PNE5;Q9H1C4	0	0	0	0	0	0	0	0	1	0	0
E9PNL8;Q13574;Q13574-1;Q13574-3;Q13574-4;Q13574-5;Q13574-6;Q13574-7
E9PNP3;E9PR47;Q9H7C9	0	0	0	0	0	0	1	0	0	0	0
E9PPC1	0	0.677491	0	0	0	0	0	0	0	0	0.322509
E9PPF6	0	0	0	0	0	0	0	0	0	0	1
E9PPQ1;J3KNE7;Q16890;Q16890-5	0	0	0.229704	0	0	0	0.770296	0	0	0	0
E9PPZ9;O43292;O43292-2	0	0	0.527471	0	0	0	0	0	0.472529	0	0
E9PQ59;Q6P4R8;Q6P4R8-2;Q6P4R8-3	0	1	0	0	0	0	0	0	0	0	0
E9PQ73;Q8TDW7;Q8TDW7-1	0	0	0	0	0	0	1	0	0	0	0
E9PQC9	0	0	0	0.279625	0	0	0	0	0.229729	0	0.490646
E9PQD7;P15880	0	0	0	0.410561	0.356324	0	0	0.233115	0	0	0
E9PQM8;E9PRF4;Q15047;Q15047-3	0	0	0.208872	0	0	0	0.791128	0	0	0	0
E9PQY2;Q9NQP4	0	0	0	0	0	0	1	0	0	0	0
E9PQZ2;Q11206;Q11206-2;Q11206-3;Q11206-4;Q11206-5;Q11206-6;Q11206-7	0	0	0	0	0	0	0	0	1	0	0
E9PR30;P62861	0	0	0	0.329863	0.438826	0	0	0.23131	0	0	0
E9PR76;E9PSH4;Q9H063	0	0	0	0	0	1	0	0	0	0	0
E9PR92	0	1	0	0	0	0	0	0	0	0	0
E9PRP3	0	0	0	0	0	0	0	1	0	0	0
E9PRQ7;Q04323	0	0	0	0	0	0	1	0	0	0	0
E9PRR7
E9PRU1;O95967	0.406714	0	0	0	0	0	0.593286	0	0	0	0
E9PS41;Q6RFH5;Q6RFH5-2	0	1	0	0	0	0	0	0	0	0	0
E9PS44;Q01628	0	0	0	0	0	0	0	0	0.412343	0.587657	0
E9PS74;Q8NBI5;Q8NBI5-2	0	0	0.224285	0	0	0	0	0.285851	0	0	0.489865
E9PSA5;Q96Q83	0	0	0	0	0	0	0	0	0.651089	0.348911	0
E9PSH1	0	0	0	0	0	1	0	0	0	0	0
E9PSI1	0	0	0	0	0	0	1	0	0	0	0
ENSEMBL:ENSBTAP00000001528	0	0	0	0.327542	0.354232	0	0	0	0	0	0.318227
ENSEMBL:ENSBTAP00000007350	0	0	0	0	0	1	0	0	0	0	0
ENSEMBL:ENSBTAP00000011227	0	0	0.360825	0	0	0	0	0	0	0.253942	0.385233
ENSEMBL:ENSBTAP00000018229;Q3MHN5	0.468473	0	0.531527	0	0	0	0	0	0	0	0
ENSEMBL:ENSBTAP00000024146
ENSEMBL:ENSBTAP00000024462;ENSEMBL:ENSBTAP00000024466	0	0.467263	0	0	0	0	0	0.532737	0	0	0
ENSEMBL:ENSBTAP00000038329;REFSEQ:XP_001252647	0	0	0	0	0.467816	0	0	0	0.224209	0	0.307974
F2Z2D2;Q9NY99	0	0	0	1	0	0	0	0	0	0	0
F2Z2E2;Q86VI3	0	0.541675	0	0	0	0	0	0.458325	0	0	0
F2Z2H4;J3KPC0;Q5VVY4;Q86XD8	0	0.651302	0.348698	0	0	0	0	0	0	0	0
F2Z2J1;Q15349;Q15349-2;Q15349-3
F2Z2U4;H0Y4W2;Q9Y4A5;Q9Y4A5-2	0	0.715589	0.284411	0	0	0	0	0	0	0	0
F2Z2W7;Q8IZ69;Q8IZ69-2	1	0	0	0	0	0	0	0	0	0	0
F2Z2X4;Q9C0E2	1	0	0	0	0	0	0	0	0	0	0
F2Z2X9	0	0	0	0	0	0	0	0	0.585065	0.414935	0
F2Z357;J3KPC5;P47736;P47736-4	0	0	0	0	0	0	1	0	0	0	0
F2Z3K0	0	0	0	0	0	0.380707	0	0	0.619293	0	0
F2Z3N3;Q68BL8	0	0	0.429177	0	0	0	0	0	0	0	0.570823
F5GWB9;I3L1L5;I3L2B9;I3L4D7;I3L4R7;I3L517;Q8NHS9;Q8NHS9-2;Q8NHS9-3	0	0	0.370109	0	0	0	0	0.629891	0	0	0
F5GWD9;F5H227;F5H3B3;F6R851;Q8WVL7	0	0	0	0	0	1	0	0	0	0	0
[truncated: 6,435 more rows]

## Sheet: E05_A_right
HFHF-fasted
Identifier	CC_PROTEIN-COMPLEX	CC_NUCLEUS	CC_LD	CC_PEROXISOME	CC_ER	CC_ENDOSOME	CC_CYTOSOL	CC_MITOCHONDRIA	CC_GOLGI	CC_LYSOSOME	CC_PM
A0A024QZ33;K7EK40;K7EMD8;K7ERM9;Q9H0G5	0	0	1	0	0	0	0	0	0	0	0
A0A024QZW4;Q9H1N7	0	0	0	0	0	0	0	0	1	0	0
A0A024QZX5;A0A087X1N8;A0A2R8YD12;P35237	0	0	0	0	0	0	1	0	0	0	0
A0A024R3B9;E9PJL7;E9PNH7;E9PRA8;P02511	0	0	0	0	0	0	0.681421	0	0	0	0.318579
A0A024R3M2;A0A1B0GUD6;A0A1B0GWG7;A0A2R8Y5X2;J3KNL5;Q3KR37;Q3KR37-2;Q3KR37-3;Q3KR37-4	1	0	0	0	0	0	0	0	0	0	0
A0A024R4E5;Q00341	0	0	0	0	0	0	0	1	0	0	0
A0A024R571;Q9H4M9
A0A024R5I4;O94956	0	0	0	0	0.581505	0	0	0	0	0	0.418495
A0A024R6I7;P01009
A0A024R7E8;K7EMV4;K7EN05;K7EPC8;K7EQ44;P60002	0	0	0	0	0	0.29819	0	0	0.70181	0	0
A0A024R7W5;A0A087WY31;A0A087X0Q1;Q7Z739	0	0	0	1	0	0	0	0	0	0	0
A0A024RA52;P25787	1	0	0	0	0	0	0	0	0	0	0
A0A024RAC6;Q14241	0	0.389733	0	0	0	0.288238	0	0	0.322029	0	0
A0A024RBG1;Q9NZJ9-2	0	0	0	0	0	0	1	0	0	0	0
A0A024RCG2;Q96BI1	0	0	0	0	1	0	0	0	0	0	0
A0A024RCN4;A0A087X2F1;B4DMT1;Q16670;Q16670-2	0	0	0	0	0	0	0	0	1	0	0
A0A024RCQ8;A0A0G2JH76;A0A0G2JHB6;A0A0G2JIU6;A0A0G2JK02;A0A0G2JKR3;A0A0G2JLA3;A0A0G2JLL3;A0A140T8X7;A0A140T9Y1;G8JLL2;Q9UMR5;Q9UMR5-2;Q9UMR5-3	0	0	0	0	0.644072	0	0	0	0	0.355928	0
A0A024RCR6;A0A0G2JK23;P46379;P46379-2;P46379-3	0	0	0	0	0	0	1	0	0	0	0
A0A044PY82	0	0	0	0.61512	0	0	0	0	0	0	0.38488
A0A067XG54;Q8NB49;Q8NB49-2;Q8NB49-3;Q8NB49-4	0	0	0	0	0	0	0	0	0	0	1
A0A075B6F9;Q9Y314	0.688929	0	0	0	0	0.311071	0	0	0	0	0
A0A075B6G3;A0A087WTU7;A0A087WV90;A0A5H1ZRP8;P11532;P11532-11;P11532-4	0	0	0	0.528445	0	0	0	0	0	0	0.471555
A0A075B6U9	0	0.355986	0	0.265947	0	0	0	0.378067	0	0	0
A0A075B6W5
A0A075B727;A0A075B728;P16284;P16284-2;P16284-3;P16284-4;P16284-5;P16284-6	0	0	0	0	0	0.381877	0	0	0.618123	0	0
A0A075B730;P58107	0	0	0	0	0	0	0	0	0	0	1
A0A075B749;A0A087WX83;Q5VU43;Q5VU43-3;Q5VU43-4	1	0	0	0	0	0	0	0	0	0	0
A0A075B754;Q96QE3;Q96QE3-2	0	0	1	0	0	0	0	0	0	0	0
A0A075B757;A0A075B762;A0A087WTQ0;A0A087WUR2;A0A087WVU4;A0A087WYI5;A0A087WZJ2;A0A087X002	0	0	0	0	0	0	0	0	0.458869	0	0.541131
A0A075B773;K7ELY8;O00623	0	0	0	0.475034	0	0	0	0.524966	0	0	0
A0A075B784;E9PEW0;K7ELR5;Q8IXW9;Q9P275	0	0.756482	0	0	0	0	0	0	0	0	0.243518
A0A075B7B1;C9JIE4;O15061;O15061-2;O15061-3	0	0	0.652431	0	0	0	0	0	0	0.347569	0
A0A075B7B5;B7ZM87;O75044
A0A075B7F1;S4R3C0	0	0	0	0.3498	0	0	0	0	0.6502	0	0
A0A087WSV6;A0A087WSX8;A0A0B4J1W1;A0A0G2JLS4;A0A0G2JM99;A0A0G2JMY9;A0A0G2JNK9;A0A0G2JNM2;A0A0G2JNQ6;A0A0G2JNR3;A0A0G2JP64;A0A0G2JP80;A0A0G2JP96;A0A0G2JQ15;A0A0G2JQ44;A0A0G2JQ46;A8MVE2;D9IDM5;D9IDM6;F6RVM3;F6TER3;O75019;O75019-2;Q8N6C8;Q8N6C8-3;Q8NHL6;Q8NHL6-2;Q8NHL6-3;Q8NHL6-4;Q8NHL6-5	0	0	0	0	0	0	0	0	1	0	0
A0A087WSW7;A0A0B4J1V9;F6XU50;Q9NRZ9;Q9NRZ9-2;Q9NRZ9-3;Q9NRZ9-4;Q9NRZ9-5;Q9NRZ9-6	0	0	0	0	0	0	0	0	0.54412	0.45588	0
A0A087WSW9;A0A087WSY9;Q16881;Q16881-3;Q16881-4	0	0	0	0	0	0	1	0	0	0	0
A0A087WSY1;O15146;O15146-2;O15146-3;Q5T0B5	0	0	0	0.412436	0	0	0	0	0.587564	0	0
A0A087WSY5;Q96IY4	0	0	0	0	0.608024	0	0	0	0	0.391976	0
A0A087WT18;Q96A73;Q96A73-2	0	0	0.373163	0	0	0	0	0.365109	0.261728	0	0
A0A087WT20;Q9NV06	0	0.796045	0	0	0	0	0	0.203955	0	0	0
A0A087WT23;A0A087WV67;O00124;O00124-3	0	0	0.386284	0	0	0	0	0	0.323459	0	0.290257
A0A087WT30;J3KN91;Q8N5I9	0	0	0.457497	0	0	0	0	0	0.542503	0	0
A0A087WT34	0	0.297706	0.702294	0	0	0	0	0	0	0	0
A0A087WT44	0	0	0	0	0.69192	0	0	0	0	0.30808	0
A0A087WT58;A6NES4	0	0	0	0	0	0.240717	0	0	0.759283	0	0
A0A087WT59;P02766	0	0	0	0	0.57937	0	0	0	0	0.42063	0
A0A087WT84;Q9H9V9;Q9H9V9-2	0	0	0.440312	0.559688	0	0	0	0	0	0	0
A0A087WT87;P43003;P43003-2	0	0	0.398184	0	0	0.291783	0	0	0.310034	0	0
A0A087WT91;A0A087WVF3;A0A087WXS9;A0A087X179;A0A087X1G2;A0A0G2JLM6;A0A0G2JMF6;A0A0G2JP35;A0A0G2JPY0;A6NDS4;A6NER0;B9A6J9;P0C7X1;Q6DHY5;Q6IPX1;Q8IZP1	0	0	0	0	0	0	0	0	1	0	0
A0A087WT95;P49753	0	0.611452	0	0	0	0	0	0.388548	0	0	0
A0A087WTA5;E7ERK9;Q9UI10;Q9UI10-2;Q9UI10-3
A0A087WTA8;P08123	0	1	0	0	0	0	0	0	0	0	0
A0A087WTF0;A2A3K4;A2A3K4-2	0	0	0	0	0	0.350641	0	0	0.355405	0	0.293954
A0A087WTJ6;O14627;P47902;P47902-2;Q99626	0.608638	0	0	0	0	0	0	0.391362	0	0	0
A0A087WTK0;A0A087WVC6;Q12913	0	0	0	0	0.339253	0	0	0	0	0.248179	0.412568
A0A087WTM1;Q9Y6N7;Q9Y6N7-2;Q9Y6N7-3;Q9Y6N7-4;Q9Y6N7-5;Q9Y6N7-6	0	0	0	0	0	0	0	0	0	0.484048	0.515952
A0A087WTP3;Q92945	0	1	0	0	0	0	0	0	0	0	0
A0A087WTQ2;A0A3B3IT47;C9JGR9;E7EQ49;Q9Y2I8;Q9Y2I8-2;Q9Y2I8-3
A0A087WTS0;H0YJK8;P18283	0	0	0	0	0	0	1	0	0	0	0
A0A087WTT2;Q5JWB9;Q96A57;Q96A57-2	0	0	0	0	0.465496	0	0	0	0.534504	0	0
A0A087WTU3;Q9Y6I9	0	0	0	0	1	0	0	0	0	0	0
A0A087WTV6;A0A087WZR9;Q96C36	0	0	0	0	0	0	0	1	0	0	0
A0A087WTY4;P49454	0	1	0	0	0	0	0	0	0	0	0
A0A087WTY7;Q9H227	0	0	0	0	0	0	1	0	0	0	0
A0A087WTZ8;E5RFJ1;E5RHW9;E5RIM1;Q96MF7	0	0	0	0	0	0	0	1	0	0	0
A0A087WU02;Q96RQ1	0	0	0	0	1	0	0	0	0	0	0
A0A087WU05;A0A087WY48;Q8IY22;Q8IY22-2;Q8IY22-3	0	0	0	0	0	0	0	0	1	0	0
A0A087WU07;Q5TGZ0;Q5TGZ0-2	0	0	0	0	0	0	0	1	0	0	0
A0A087WU25	0	0	0	0	0	0	0	1	0	0	0
A0A087WU31;A0A0A0MTB7;E9PE15;P51790;P51790-2;P51790-4;P51790-5	0	0	0	0	0	0.469584	0	0	0.530416	0	0
A0A087WU37;A0A087WWG3;A0A087X140;A0A0A0MRU4;A0A0A6YYH9;C9J3G2;H0Y857;Q5JTY5;Q5JTY5-2;Q5RIA9;Q5RIA9-3;Q5RIB0;Q5RIB3;Q8IUF1;Q9BRT8;Q9BRT8-2;Q9BRT8-3
A0A087WU51	0.432724	0	0	0	0	0.200193	0	0	0.367083	0	0
A0A087WU53;Q9H0U3	0	0	0	0	1	0	0	0	0	0	0
A0A087WUB9;Q8WYA6;Q8WYA6-4	0	1	0	0	0	0	0	0	0	0	0
A0A087WUC6;E9PI68;Q15005	0	0	0	0	0.710977	0	0	0.289023	0	0	0
A0A087WUD3;Q9NRP0;Q9NRP0-2	0	0	0	0.206966	0.36862	0	0	0.424414	0	0	0
A0A087WUE2	0	0	0.640951	0	0	0	0	0	0.359049	0	0
A0A087WUE4;A0A0G2JNN3;C9JMY0;Q96PV6;Q96PV6-1	0	1	0	0	0	0	0	0	0	0	0
A0A087WUE6;A4PB68;Q3T8J9;Q3T8J9-2;Q3T8J9-3;Q9H869;Q9H869-2;Q9H869-3;Q9H869-4;Q9H869-5;Q9H869-6;Q9H869-7;Q9H869-8;Q9H869-9	0	0	0	0.280957	0	0	0	0.390524	0	0	0.328519
A0A087WUI6;Q8WXW3	0	0	0	0	1	0	0	0	0	0	0
A0A087WUJ1;Q9H400;Q9H400-2	0	0	0	0.440527	0	0	0	0	0	0.30975	0.249723
A0A087WUK2;O14979;O14979-2;O14979-3	0	1	0	0	0	0	0	0	0	0	0
A0A087WUL2	1	0	0	0	0	0	0	0	0	0	0
A0A087WUL4;A0A087WX23;A0A087WZG9;B4DSP0	0.660793	0	0	0	0	0.339207	0	0	0	0	0
A0A087WUM5;Q5VZR0;Q9H4G4	0	0	0	0	0	0	0	0	0	0.39658	0.60342
A0A087WUQ6;P07203	0	0	0	0	0	0	0	1	0	0	0
A0A087WUT0;A0A0A0MR39	0	1	0	0	0	0	0	0	0	0	0
A0A087WUT6;O60841	0	1	0	0	0	0	0	0	0	0	0
A0A087WUU8;M0R3J2	0	0.333294	0	0	0	0	0	0.234286	0	0	0.43242
A0A087WUV7;A0A3B3IS76;A0A3B3ISL9;A0A3B3ISM6;A0A3B3ISX6;A0A3B3ITJ2;A0A3B3IUC8;P10746;Q5T3L9	1	0	0	0	0	0	0	0	0	0	0
A0A087WUW6;A0A087X0G7;A0A087X1B1;Q9Y6K9;Q9Y6K9-2;Q9Y6K9-3	0	0	1	0	0	0	0	0	0	0	0
A0A087WUW9;Q9NXU5	0	0	1	0	0	0	0	0	0	0	0
A0A087WUZ7;Q9Y5W8;Q9Y5W8-2	0	0	0	0	1	0	0	0	0	0	0
A0A087WV01	0	0	0	0	0	0	0	1	0	0	0
A0A087WV05;Q99417
A0A087WV24;P20711;P20711-3	0	0	0	0	0	0	1	0	0	0	0
A0A087WV25;O95684;O95684-2	0	0	0	0	0	0	0.752651	0	0.247349	0	0
A0A087WV39;Q92698;V9GYD3	0	0	0	0	0	0	0	0	1	0	0
A0A087WV61;G3V112;H0YBV2;Q8NE09;Q8NE09-3	0.387066	0	0	0	0	0	0	0	0.612934	0	0
A0A087WV97;Q8WU79;Q8WU79-2;Q8WU79-3
A0A087WVA1;P62341	0	0	0	0	1	0	0	0	0	0	0
A0A087WVA8;Q8IWB9;Q8IWB9-2
A0A087WVC1;Q9BQ39	0	1	0	0	0	0	0	0	0	0	0
A0A087WVE2;O00602	0	0.37163	0	0	0	0	0	0	0.62837	0	0
A0A087WVF1;K7EQH1;Q96B23;Q96B23-2	0	0	0	0.315468	0	0	0	0.263103	0	0	0.421429
A0A087WVF7;Q9NZM3;Q9NZM3-2	0	0	0	0.377364	0	0	0	0	0	0.317476	0.30516
A0A087WVI0;E9PBL8;Q8WTW3	1	0	0	0	0	0	0	0	0	0	0
A0A087WVM1;P78382;P78382-2;Q5W1L7	0	0	0	0	0	0.254977	0	0	0.745023	0	0
A0A087WVM4;B7ZM99	0	0	0.317631	0	0	0	0	0.682369	0	0	0
A0A087WVP7;P0C024;P0C024-2	0	0	0	1	0	0	0	0	0	0	0
A0A087WVQ6;Q00610;Q00610-2
A0A087WVS8;Q70IA6;Q70IA6-3	0.299131	0	0	0	0	0	0.700869	0	0	0	0
A0A087WVT6;A0A087X159;D6RAC5;P81877;P81877-2;P81877-3;P81877-4;P81877-5;Q9BWW4;Q9BWW4-2;Q9BWW4-3	0	0.517792	0	0	0	0	0	0	0.482208	0	0
A0A087WVT8;A0A087X1L3;Q6ZWJ8	0	0	0	0.381846	0	0	0	0	0	0	0.618154
A0A087WVX4;P49895;P49895-2;P49895-4	0	0	0.419636	0	0.580364	0	0	0	0	0	0
A0A087WVX5;A0A1B0GTA9;A0A1B0GTF6;A0A1B0GTN8;A0A1B0GTP5;A0A1B0GTS4;A0A1B0GTX2;A0A1B0GU53;A0A1B0GUI8;A0A1B0GUK4;A0A1B0GVB2;A0A1B0GWF9;A0A1C7CYX2;A0A2R8Y555;A0A2U3TZM7;A0A494C0B2;A0A494C0Z9;A0A494C184;E7EN11;F8VNV8;F8VU10;F8VUW8;H0Y476;O00305;O00305-2;O00305-3;O00305-4;P54284;P54284-2;P54284-3;P54284-4;P54284-5;Q02641;Q02641-2;Q02641-3;Q08289;Q08289-10;Q08289-2;Q08289-3;Q08289-4;Q08289-5;Q08289-6;Q0…	0	0	0	0	0	0	0	0	0	0	1
A0A087WVZ7;A0A087X068;Q9UJW7;Q9UJW7-2	0	0	0.495781	0	0	0	0	0.504219	0	0	0
A0A087WVZ9;A0A0A0MQR7;P19388	0	0	0	0	0	0.312889	0	0	0.342199	0	0.344912
A0A087WW00;C9J9H9;P51668;Q9Y2X8	0	0	0	0	0	0	1	0	0	0	0
A0A087WW06;B0QYP5;Q96AY4	0	0	0	0	0	0	0	0	1	0	0
A0A087WW23;P20292	0	0.548471	0	0	0	0	0	0	0	0	0.451529
A0A087WW28	1	0	0	0	0	0	0	0	0	0	0
A0A087WW48;E7ET14;H0Y3N9;H0Y589;O75151;Q9UPP1;Q9UPP1-2;Q9UPP1-3;Q9UPP1-4;Q9UPP1-5	0.458525	0	0.541475	0	0	0	0	0	0	0	0
A0A087WW58;Q9C0D9	0	0	0	0	0.624584	0	0	0	0.375416	0	0
A0A087WW59;Q7Z7L8	0	0	0	0	0	0	1	0	0	0	0
A0A087WW66;Q99460;Q99460-2	1	0	0	0	0	0	0	0	0	0	0
A0A087WW76;A0A1B0GTZ9;A0A1B0GV73;A0A452Q6Z5;H0Y468;Q5T5U3	0	0	0	0	0	0	0	0	1	0	0
A0A087WW77;Q15334
A0A087WWA3;O60333;O60333-2;O60333-4;Q4R9M9	0.385168	0	0	0	0	0	0.614832	0	0	0	0
A0A087WWA7;O14640;O14640-2;P54792;P54792-2	0	0	0	0	0	0.318577	0	0	0.681423	0	0
A0A087WWF6;F8W8R3;P49005	0	0	0	0	0	1	0	0	0	0	0
A0A087WWG5	0	0	0.306806	0	0.693194	0	0	0	0	0	0
A0A087WWH3;Q9NZM4;Q9NZM4-2	0	1	0	0	0	0	0	0	0	0	0
A0A087WWI0	0	0	0	0	0	0	1	0	0	0	0
A0A087WWM0;O43617	0.385289	0	0	0	0	0	0.614711	0	0	0	0
A0A087WWM4;H0YNJ6;Q9P2T1;Q9P2T1-2	0	0	0	0	0	0	1	0	0	0	0
A0A087WWM6;E7EQL6;O43272;O43272-1;O43272-2	0	0	0	0	0	0	0	1	0	0	0
A0A087WWP4;A0A494C001;A0A499FJY3;Q96T37;Q96T37-2;Q96T37-3;Q96T37-4	0	1	0	0	0	0	0	0	0	0	0
A0A087WWP5;Q12962	0	0.62773	0	0	0	0	0	0	0.37227	0	0
A0A087WWP8;A0A0C4DGT8;A0A0C4DH79;Q5VWQ0;Q5VWQ0-4	0	0	0	0	0	0	0	0.751341	0	0	0.248659
A0A087WWQ2;Q92979;V9GYP5	0	1	0	0	0	0	0	0	0	0	0
A0A087WWR2;H3BQI4;H3BQS2;I3L2Z5;P56270;P56270-2;P56270-3;P56270-4	0	1	0	0	0	0	0	0	0	0	0
A0A087WWS1;Q96FV9	0	1	0	0	0	0	0	0	0	0	0
A0A087WWT7;A0A1W2PRP3;Q7Z7M1	0.424226	0	0	0	0	0.265612	0	0	0.310162	0	0
A0A087WWU8	0	0	0	1	0	0	0	0	0	0	0
A0A087WWW9;O95999	0	0	0	0	0	0	1	0	0	0	0
A0A087WWY0;P08519	0	0	0.314416	0	0.685584	0	0	0	0	0	0
A0A087WX02;F8WB74;M0QYX1;P63302	0	0	0.668082	0	0	0	0	0	0.331918	0	0
A0A087WX10;G3V4M2;G3V5E8;P54803	0	0	0	0	0.435153	0	0	0	0	0.259847	0.305
A0A087WX11;J3KNG8;Q8TF40;Q8TF40-3	0.596947	0	0.403053	0	0	0	0	0	0	0	0
A0A087WX19;A0A087WX45;C9J5R6	0	0	0	0	0	0	0	1	0	0	0
A0A087WX22;H3BVG2;Q2M296-3;Q2M296-4	0	0	0	0	0	0	0	0	0	0	1
A0A087WX80;A0A087WYF1;P24043	0	0.42405	0	0.290503	0	0	0	0	0	0	0.285446
A0A087WX97;Q9BXK5	0	0	0	0.508784	0	0	0	0.491216	0	0	0
A0A087WX99;A0A0G2JRA4;P55283;P55283-2	0	0	0.472379	0	0	0	0	0	0.527621	0	0
A0A087WXB0;O15126
A0A087WXC5;E7ESZ7;O95299	0	0	0	0	0	0	0	1	0	0	0
A0A087WXD1;Q96T83	0	0	0	0	0.46421	0	0	0	0.261217	0.274574	0
A0A087WXF8;A0A087WYV3;A0A0D9SEW3;Q9NP64;Q9NP64-2;Q9NP64-3	0	0	0	0	0	0	0	0	0	0	1
A0A087WXI2;Q9Y6R7	0	1	0	0	0	0	0	0	0	0	0
A0A087WXI5;P12830;P12830-2	0	0	0	0.53697	0	0	0	0	0	0	0.46303
A0A087WXL0;A0A087X1G7;A0A0J9YX89;A0A3B3IT39;A8MZD0;O60613;O60613-2	0	0	0	0	1	0	0	0	0	0	0
A0A087WXL6;B7Z879;Q9H270
A0A087WXM6;A0A0A6YYL6;J3KRX5;J3QQT2;P18621;P18621-3	0	0	0	0	0.496407	0	0	0.503593	0	0	0
A0A087WXN9;Q765P7	0	0	0	0	0	0	1	0	0	0	0
A0A087WXP0	0	0.407032	0	0	0	0	0	0	0.317375	0	0.275593
A0A087WXS6;C9JBF1	0.417811	0	0.582189	0	0	0	0	0	0	0	0
A0A087WXU0;A0A2R8Y4J4;Q9NWS8;Q9NWS8-2	0	0	0	0	0	0	0	1	0	0	0
A0A087WXV4;P41235;P41235-2;P41235-4;P41235-5;P41235-6	0	0.747874	0	0	0	0	0	0	0	0	0.252126
A0A087WXW3;Q9Y3P8	0	0.586118	0	0	0	0	0	0.413882	0	0	0
A0A087WXW6;A0A140TA70;A0A140TA74;A9JR48;Q9BXA9;Q9BXA9-2;Q9BXA9-3;Q9BXA9-4	0	0	1	0	0	0	0	0	0	0	0
A0A087WXX8	0	0	0	0.430278	0	0	0	0.569722	0	0	0
A0A087WY00;F8W6H6;F8WE88;G3V394;Q9Y4I1;Q9Y4I1-2;Q9Y4I1-3	0	0	0	0	0	0	0	0	0.528146	0	0.471854
A0A087WY55;Q9NP79	0	0	0	0	0	0	1	0	0	0	0
A0A087WY67;P0CG29;P0CG30;Q6ICJ4	0	0	0	0	0	0	1	0	0	0	0
A0A087WY71;Q96CW1;Q96CW1-2	0	0	0	0.504898	0	0	0	0	0	0	0.495102
A0A087WY85;A0A0A0MQU3;D6RAH7;D6RFM0;H9KV45;P61077;P61077-2;P61077-3;P62837;P62837-2	0.393178	0	0	0	0	0	0.606822	0	0	0	0
A0A087WYA1;Q9UKN7	0	0.459255	0	0	0	0	0	0.540745	0	0	0
A0A087WYD6;A0A0G2JLV0;Q03519;X5CMH5	0	0	0	0	1	0	0	0	0	0	0
A0A087WYF2;F5H2F2;P54687;P54687-2;P54687-3;P54687-4;P54687-5	0	0	0.326941	0	0	0.271499	0	0	0.40156	0	0
A0A087WYF7;Q6UXV4	0	0.271877	0	0	0	0	0	0.728123	0	0	0
A0A087WYJ2;M0QZR8;M0R2B7;P28340	0	0	0.481042	0	0	0	0	0	0	0	0.518958
A0A087WYL3;Q17R60	0	0	0	0	0	0	0	0	1	0	0
A0A087WYL6;A0A087WZG6;A0A087X1S9;Q8TEW8;Q8TEW8-2;Q8TEW8-3;Q8TEW8-5;Q8TEW8-6;R4GN62
A0A087WYM3;A0A0A0MRF5;E7EWX6;Q8IXJ6;Q8IXJ6-2;Q8IXJ6-3;Q8IXJ6-4
A0A087WYN9;Q7Z478	0	0	0	0.303628	0.406975	0	0	0.289397	0	0	0
A0A087WYP2;Q8IZQ5	0	1	0	0	0	0	0	0	0	0	0
A0A087WYR0;P09132	0	0	0	0	1	0	0	0	0	0	0
A0A087WYS3;Q9ULU4;Q9ULU4-10;Q9ULU4-11;Q9ULU4-12;Q9ULU4-13;Q9ULU4-19;Q9ULU4-22;Q9ULU4-7;Q9ULU4-8;Q9ULU4-9	0	0	0	0	0	0	1	0	0	0	0
A0A087WYT3;Q15185;Q15185-4	0.398631	0	0	0	0	0	0.601369	0	0	0	0
A0A087WYV9;A0A087X1F5;P57105	0	0	0	0	0	0	0	1	0	0	0
A0A087WYX8;A0A1W2PQW0;A0A590UJL7;A0A5F9ZH12;A0A5F9ZHT2;A0A6Q8PH73;Q14CM0	0	0.436738	0	0	0	0	0	0.563262	0	0	0
A0A087WYY0;A0A087X260;B1AKP7;G3V162;Q13148	0	1	0	0	0	0	0	0	0	0	0
A0A087WZ13;E9PAU2;Q8IY67;Q8IY67-2	0	0	0	0	0	0	1	0	0	0	0
A0A087WZ32;A8K727;Q9HB19	0	0	0	0	0	0	1	0	0	0	0
A0A087WZ40;Q14244;Q14244-6;Q14244-7	0	0	0	0	0	0	1	0	0	0	0
A0A087WZ62;Q9H6U8;Q9H6U8-3	0	0	0	0	1	0	0	0	0	0	0
A0A087WZ97;A0A087WZK6;A0A087X2C2;Q5T7M9	0	0	0	0	0	0.204665	0	0	0.795335	0	0
A0A087WZB5
A0A087WZC1;Q6IN84;Q6IN84-2	0	0.378734	0	0	0	0	0	0.621266	0	0	0
A0A087WZC2;A0A0C4DGS8;E0YMJ8;P35680;P35680-2;P35680-3;P35680-4	0	1	0	0	0	0	0	0	0	0	0
A0A087WZE9	0	1	0	0	0	0	0	0	0	0	0
A0A087WZG4;A0A3B3IPE9;A0A590UK10;Q6ZSZ5;Q6ZSZ5-1;Q6ZSZ5-2;Q6ZSZ5-5;Q6ZSZ5-6	0	0	0	0	0	0	1	0	0	0	0
A0A087WZJ5	0	0	0	0	0	0	0	1	0	0	0
A0A087WZK0;M0R1T4;P49366;P49366-2;P49366-3	0	1	0	0	0	0	0	0	0	0	0
A0A087WZK9;B3KS98;O15372	0.616387	0	0	0	0	0.383613	0	0	0	0	0
A0A087WZM2;D6REQ6;D6RHI9;O00584	0	0	0	0	0.664124	0	0	0.335876	0	0	0
A0A087WZM8;Q8TBM7;Q8TBM7-2;Q8TBM7-3	0	0	0	0	0.625001	0	0	0	0	0	0.374999
A0A087WZN1;O43837	0	0	0	0	0	0	0	1	0	0	0
A0A087WZP9	0	0.195233	0	0	0.36562	0	0	0	0	0.241927	0.197221
A0A087WZQ7;Q9H115	0	0	0	0	0	0.263744	0	0	0.736256	0	0
A0A087WZT0;M0QY61;M0QZ22;M0R0X3;Q5PRF9	0	0	0	0	0	0.53548	0	0	0.46452	0	0
A0A087WZT2;Q6UX53	0	0	0.540205	0	0.459795	0	0	0	0	0	0
A0A087WZT3;Q9H3K6	0	0	0	0	0	0	1	0	0	0	0
A0A087WZU2;E5RGN0;Q00536;Q00536-2;Q00536-3	0	0	0	0	0	0	1	0	0	0	0
A0A087WZU5;O43657	0	0	0	0	0	0	0	0	1	0	0
A0A087WZV0;O43314
A0A087WZY2;A6NIV2;Q9P0U1
A0A087WZY5;A8MXH5;F5H3Q5;F5H851;Q14031;Q14031-2	0	0	0	0.266363	0.529149	0	0	0	0	0	0.204488
A0A087X011;E9PES4;J3KPF9;Q9Y496
A0A087X020;Q9Y3A5	0	0	0	0	0	1	0	0	0	0	0
A0A087X080;A0A0U1RRH1;A0A0X1KG73;Q15413;Q15413-2;Q15413-3	1	0	0	0	0	0	0	0	0	0	0
A0A087X091	0.449049	0	0	0	0	0	0.550951	0	0	0	0
A0A087X0D5;P09668	0	0	0	0	0.55238	0	0	0	0	0.44762	0
A0A087X0F1;Q9UK61;Q9UK61-2;Q9UK61-3;Q9UK61-4	0	0.698662	0	0	0	0	0	0.301338	0	0	0
A0A087X0H5;P10912;P10912-4	0	0	0	0	0	0	0	0	0	0	1
A0A087X0H8;Q15714;Q15714-2;Q15714-3	0	0	0.242352	0	0	0	0.757648	0	0	0	0
A0A087X0H9;Q5T8P6	0	1	0	0	0	0	0	0	0	0	0
A0A087X0K0;P39059	0	0.279523	0.372781	0	0	0	0	0	0	0	0.347696
A0A087X0K4;Q7Z408;Q7Z408-2;Q7Z408-4	0	0.585269	0	0	0	0	0	0.414731	0	0	0
A0A087X0K9	0	0.354915	0	0	0	0	0	0	0	0	0.645085
A0A087X0L7;E7EVY0;J3KNA0;Q15070;Q15070-2	0	0	0	0	0	0	0	1	0	0	0
A0A087X0M4;Q9BWU0	0.352152	0	0	0	0	0	0.647848	0	0	0	0
A0A087X0N2;A0A3B3ISI6;O15243	0	0	0	0	0.372959	0	0	0	0.243983	0	0.383058
A0A087X0P0	0	0	0	0	0	0	0	0	1	0	0
A0A087X0Q9;Q9BVL4	0	0	0	0	0	0	1	0	0	0	0
A0A087X0R6;Q9UMY4;Q9UMY4-1	0	0	0	0	0	0	1	0	0	0	0
A0A087X0R7;Q9H4L4	0	1	0	0	0	0	0	0	0	0	0
A0A087X0R9;B8ZZK1;Q07837;Q07837-2;Q07837-5;Q07837-6;Q07837-7	0	0	0	0	0.447508	0	0	0	0	0	0.552492
A0A087X0S5;P12109	0	1	0	0	0	0	0	0	0	0	0
A0A087X0T5;Q96AB6	0.674325	0	0	0	0	0.325675	0	0	0	0	0
A0A087X0V5;P29728;P29728-2
A0A087X0W8;Q04206;Q04206-2;Q04206-3;Q04206-4;Q2TAM5	0	0	0	0	0	0	1	0	0	0	0
A0A087X0W9;Q8N6M0	0.511547	0	0	0	0	0	0.488453	0	0	0	0
A0A087X0X3;P52272;P52272-2	0	1	0	0	0	0	0	0	0	0	0
A0A087X0Y2;A0A087X248;A0A087X2I9;A0A096LPD8;F5GWV3;F5H3N7;F5H8B4;O14607;O14607-2;O14607-3;O14607-4;O14607-5	0	0.353723	0	0	0	0	0	0	0.646277	0	0
A0A087X108	0	0	0	0	0	0	1	0	0	0	0
A0A087X117;A0A0G2JN29;Q15155	0	0	0	0	0	0	0	0.757036	0	0	0.242964
A0A087X138;Q8TF71	0	0	0.532913	0	0	0	0	0	0	0	0.467087
A0A087X1A8;A0A2R8Y3X7;D3VVH9;F5H211;G3V3R7;P54252;P54252-1;P54252-4	0	0	0	0	0	0	1	0	0	0	0
A0A087X1B2	0	1	0	0	0	0	0	0	0	0	0
A0A087X1B6;E9PEG3;F5GZG9;P10275;P10275-3;P10275-4	0.60811	0	0	0	0	0	0	0	0.39189	0	0
A0A087X1E4;P53365;P53365-3	0.425861	0	0	0	0	0.271544	0	0	0.302595	0	0
A0A087X1G1;H7BYD0;Q16718;Q16718-2	0	0	0	0	0	0	0	1	0	0	0
A0A087X1G4	0	0	0.292556	0	0	0	0	0	0.363583	0	0.343862
A0A087X1J2	0	0	0	0	0	0	0	1	0	0	0
A0A087X1J7;P22352	0	0.530859	0	0.469141	0	0	0	0	0	0	0
A0A087X1K1;Q96C00	0	0	0	0	0	0.342114	0	0	0.657886	0	0
A0A087X1N0;Q9H3C7	0	0	0	0	0	0	0	0	0.445435	0	0.554565
A0A087X1N3;F8WC38;O75818;O75818-2
A0A087X1N7;P20929;P20929-2;P20929-3;P20929-4	0	0	0	0	0	0.301173	0	0	0.698827	0	0
A0A087X1P3;C9IYE1;F8W8P5;H7BYR4;Q86UW7;Q86UW7-2;Q86UW7-3	0	0	0.426759	0	0	0	0	0	0.573241	0	0
A0A087X1P5;J3KQ41;J3QT95;Q9H9Q2;Q9H9Q2-3	0.321499	0	0	0	0	0	0.678501	0	0	0	0
A0A087X1R3;A0A0C4DGX0;A6QL64;Q8N2N9	0.38789	0	0	0	0	0	0.61211	0	0	0	0
A0A087X1S3	0	0	0	0	0	0	0	0	0.554842	0	0.445158
A0A087X1T7;A0A5K1VW97;H0YMF1;P16112;P16112-2;P16112-3	0	0	0	0	0	0	0	0	0.586084	0	0.413916
A0A087X1U5;F5H7T0;F6RJM5;Q96S38;Q96S38-2	0.60284	0	0	0	0	0	0	0	0.39716	0	0
A0A087X1W8;A0A0A0MTJ8;Q9BY67;Q9BY67-3;Q9BY67-4;Q9BY67-5;X5DQS5	0	0	0.279461	0.433532	0	0	0	0	0	0	0.287006
A0A087X1Z1;A0A0G2JPW5;A0A0G2JQX1;A0A0G2JSA7;Q96RT8;Q96RT8-2	0.627871	0	0	0.372129	0	0	0	0	0	0	0
A0A087X1Z3;Q9UL46	0.502965	0	0	0	0	0	0.497035	0	0	0	0
A0A087X241;Q2NKQ1;Q2NKQ1-3;Q2NKQ1-4	0	0.620373	0.379627	0	0	0	0	0	0	0	0
A0A087X256;Q2M389
A0A087X266;Q9BXJ8	0	0	0	0	1	0	0	0	0	0	0
A0A087X279;P09913	0	0	0	0	0	0	1	0	0	0	0
A0A087X283;A0A1B0GX65;B7Z306;C9J180;C9J2P0;H7C061;P51965;P51965-2;P51965-3;Q969T4;Q96LR5;R4GN77;R4GND1	0	0	0	0	0	0	1	0	0	0	0
A0A087X294;O75914;O75914-2;O75914-3;O75914-4	0	0	0	0	0	0	1	0	0	0	0
A0A087X295;E9PDU5;Q9NNW5	1	0	0	0	0	0	0	0	0	0	0
A0A087X296;P23219;P23219-2;P23219-3;P23219-4;P23219-5;P23219-6	0	0	0	0.388077	0	0	0	0.349279	0	0	0.262644
A0A087X2A7;H0YBA5;H7BY63;Q8NB25;Q8NB25-2;Q8NB25-3;Q8NB25-4	0	0	0	0	0	0.504206	0	0	0.495794	0	0
A0A087X2B2;E9PMH5;Q13490;Q13490-2	0.476853	0	0	0	0	0.229485	0	0	0.293662	0	0
A0A087X2B5;P35613;P35613-2	0	0	0	0	0	0	0	0	0	0.403331	0.596669
A0A087X2B6	1	0	0	0	0	0	0	0	0	0	0
A0A087X2D5;Q9BRJ2	0	0.465802	0	0	0	0	0	0.534198	0	0	0
A0A087X2D8;O60271-2;O60271-4	0	0	0	0	0	0	0.650743	0	0.349257	0	0
A0A087X2G6;A0A0C4DGU5;D6RIC3;Q9Y3C1;Q9Y3C1-2;Q9Y3C1-3	0	0.457142	0	0	0	0	0	0	0	0.274809	0.268049
A0A087X2I1;P62333	1	0	0	0	0	0	0	0	0	0	0
A0A088AWN3;A0A0A0MSY4;Q9BZ29;Q9BZ29-3;Q9BZ29-4;Q9BZ29-5	0	0	0	0	0	0	0	1	0	0	0
A0A088AWN8;E7EP87;E9PH27;J3KS48;J3KT43;J3QRB0;Q9UHQ1;Q9UHQ1-2;Q9UHQ1-3;Q9UHQ1-4	1	0	0	0	0	0	0	0	0	0	0
A0A088AWP2;A0A0C4DG41;A8MX39;A8MZ24;B5MDW0;P11308;P11308-1;P11308-2;P11308-3;P11308-5;P11308-6	1	0	0	0	0	0	0	0	0	0	0
A0A088AWP5;E9PDC2;H7BZH9;Q8WUY3;Q8WUY3-2;Q8WUY3-3;Q8WUY3-4	0	0	0	0.326755	0	0	0	0	0	0	0.673245
A0A090HNM7;A0A1W2PS85;P28715;R4GMW8	0	1	0	0	0	0	0	0	0	0	0
A0A096LNH6;Q14185	0	1	0	0	0	0	0	0	0	0	0
A0A096LNV3;A0A096LP02;Q9Y508;Q9Y508-2	0	0	0	0	0	0.459723	0	0	0.540277	0	0
A0A096LP22;A0A096LP34;C9J7Z1;Q86Y79	0	0	0	0	0	0	0	1	0	0	0
A0A096LP69	0	0	0	0	0	0.305579	0	0	0.365755	0	0.328666
A0A096LPC5;A0A0A0MR88;Q9Y4E1;Q9Y4E1-1;Q9Y4E1-2;Q9Y4E1-6	0	0	0	0	0	0.369867	0	0	0.630133	0	0
A0A096LPE2	0	0	1	0	0	0	0	0	0	0	0
A0A096LPI6	0	0	0	0	0	0	0	1	0	0	0
A0A096LPJ4;P05161	0	0	0	0	0	0	1	0	0	0	0
A0A096LPJ9;A0A140G945;A0A140G945-2;E7EWH7;P02489	0.611277	0	0	0	0	0	0	0	0.388723	0	0
A0A0A0MQR2;Q9BY42	0	0	0	0	0	0	1	0	0	0	0
A0A0A0MQR4;I3L2J0;Q96RK0	0	1	0	0	0	0	0	0	0	0	0
A0A0A0MQS1;Q53H96;Q53H96-2	1	0	0	0	0	0	0	0	0	0	0
A0A0A0MQS9;A0A0A0MTC7;Q16363;Q16363-2	0	0.498113	0	0	0	0	0	0	0	0	0.501887
A0A0A0MQT0;P09455	0	0	0	0	0	0	1	0	0	0	0
A0A0A0MQU0;Q9BV38;U3KQC1	0	1	0	0	0	0	0	0	0	0	0
A0A0A0MQU4;Q96I15	0	0	0	0	0	0	1	0	0	0	0
A0A0A0MQU7;A0A0A0MTK8;F5H0K0;P20823;P20823-2;P20823-3;P20823-7;U3KQS6	0	1	0	0	0	0	0	0	0	0	0
A0A0A0MQV6;P09038;P09038-1;P09038-2;P09038-3	0	0.372492	0.313344	0	0	0	0	0	0	0	0.314163
A0A0A0MQX1;D6RGD1;Q9HD67	0	0	0	0	0	0.322351	0	0	0.38014	0	0.297508
A0A0A0MQX8;C9JP00;Q9NR56;Q9NR56-2;Q9NR56-5;Q9NR56-6;Q9NR56-7	0	1	0	0	0	0	0	0	0	0	0
A0A0A0MQY7;A0A3B3ISH2;Q5VU97	0	0	0.457439	0	0	0.542561	0	0	0	0	0
A0A0A0MQZ4;Q8N3J5;V9GY69	0	0	0	0	0	0	0	1	0	0	0
A0A0A0MR02;P45880;P45880-1;P45880-2	0	0	0	0	0	0	0	1	0	0	0
A0A0A0MR03;A0A0J9YWB6;A0A0J9YWJ4;K7EJD2;Q9Y5B0;Q9Y5B0-4	0	0	0	0	0	0	0.756506	0	0.243494	0	0
A0A0A0MR05;H3BM50;H3BN58;H3BPT1;H3BPU5;Q9BVC4;Q9BVC4-4;Q9BVC4-5	0	0	0	0	0	0	0	0	1	0	0
A0A0A0MR07;F5H5P4;P15498;P15498-2;Q96D37	0.587867	0	0	0	0	0	0	0	0	0	0.412133
A0A0A0MR09;P43378	0	0	1	0	0	0	0	0	0	0	0
A0A0A0MR11;A0A0A0MRS1;Q06730;Q06730-2;Q06730-3	0	0	0.422344	0	0	0	0	0	0.577656	0	0
A0A0A0MR25;A0A5S6RJB7;D2CGD1;E7EVR7;H7BXU9;H7C265;P21802;P21802-15;P21802-16;P21802-17;P21802-18;P21802-2;P21802-20;P21802-21;P21802-22;P21802-23;P21802-3;P21802-4;P21802-5;P21802-6;P21802-8;S4R381	0.469959	0	0.530041	0	0	0	0	0	0	0	0
A0A0A0MR36;Q9ULV0-2	0	0	0	0	0.749093	0	0	0	0	0	0.250907
A0A0A0MR51;H7C2V0;O60427	0	0	0	0	1	0	0	0	0	0	0
A0A0A0MR67;A0A0A0MSA1;E9PDI6;F5GY28;F5H522;Q13936;Q13936-10;Q13936-11;Q13936-12;Q13936-13;Q13936-14;Q13936-15;Q13936-16;Q13936-17;Q13936-18;Q13936-19;Q13936-2;Q13936-20;Q13936-21;Q13936-22;Q13936-23;Q13936-24;Q13936-25;Q13936-26;Q13936-27;Q13936-28;Q13936-29;Q13936-3;Q13936-30;Q13936-31;Q13936-32;Q13936-33;Q13936-34;Q13936-35;Q13936-36;Q13936-37;Q13936-4;Q13936-5;Q13936-6;Q13936-7;Q13936-8;Q13936…	1	0	0	0	0	0	0	0	0	0	0
A0A0A0MR74;O75907	0	0	0	0	0.516817	0	0	0.483183	0	0	0
A0A0A0MR93;A0A0C4DH11;K7ELZ7;K7ES91;Q53F39;Q53F39-2;Q53F39-3	0	0	0	0	0.535109	0	0	0	0.464891	0	0
A0A0A0MRA5;B7Z4B8;M0R3F1;Q9BUJ2;Q9BUJ2-2;Q9BUJ2-4	0	1	0	0	0	0	0	0	0	0	0
A0A0A0MRA8;A8K968;Q9Y2J2;Q9Y2J2-2	0	0	0	0.478672	0	0	0	0	0	0	0.521328
A0A0A0MRB5;Q8WXG6;Q8WXG6-2;Q8WXG6-3;Q8WXG6-4;Q8WXG6-5;Q8WXG6-6;Q8WXG6-7;Q8WXG6-8	0.470967	0	0	0	0	0.259251	0	0	0.269781	0	0
A0A0A0MRD0;A0A2R8YCE3;F5H4B4;F5H4B4-2	0	1	0	0	0	0	0	0	0	0	0
A0A0A0MRE5;Q9ULH1;Q9ULH1-2
A0A0A0MRF6;Q99996;Q99996-1;Q99996-3;Q99996-5;Q99996-6	1	0	0	0	0	0	0	0	0	0	0
A0A0A0MRF9;P16885	0	0	0	0	0	0	1	0	0	0	0
A0A0A0MRG8;Q16611	0	0	0	0.281224	0	0	0	0.718776	0	0	0
A0A0A0MRH3;Q9Y2W7;Q9Y2W7-2;Q9Y2W7-3	0	1	0	0	0	0	0	0	0	0	0
A0A0A0MRI1;Q8IXQ4	0	0	0	0	0	0	1	0	0	0	0
A0A0A0MRI2;Q9UNH7	0.389979	0	0	0	0	0	0.610021	0	0	0	0
A0A0A0MRJ0;Q5VT25;Q5VT25-2;Q5VT25-3;Q5VT25-4;Q5VT25-5;Q5VT25-6	0	0	0	0	0	0	0	0	0	0	1
A0A0A0MRJ6	0	0	0	0	0	0	1	0	0	0	0
A0A0A0MRJ7;P12259	0	0	0	0	1	0	0	0	0	0	0
A0A0A0MRM2;Q86VF7;Q86VF7-2;Q86VF7-3;Q86VF7-4	0.609966	0	0	0	0	0	0	0	0.390034	0	0
A0A0A0MRM9;Q14978;Q14978-2;Q14978-3	0	1	0	0	0	0	0	0	0	0	0
A0A0A0MRP6;B7ZLQ5;P28370;P28370-2	0	0.76031	0	0	0	0	0	0	0	0	0.23969
A0A0A0MRR1;Q5VV50;Q5VV51;Q5VV52;Q5VV52-3	0	1	0	0	0	0	0	0	0	0	0
A0A0A0MRR7;P09234	0	1	0	0	0	0	0	0	0	0	0
A0A0A0MRS8;Q9P2E2;Q9P2E2-3	0.387744	0	0	0	0	0.368657	0	0	0.243599	0	0
A0A0A0MRT2;Q9BTA9;Q9BTA9-2;Q9BTA9-5	0	0	0	1	0	0	0	0	0	0	0
A0A0A0MRT6;Q8IZP0;Q8IZP0-2;Q8IZP0-3;Q8IZP0-4;Q8IZP0-5;Q8IZP0-6;Q8IZP0-9
A0A0A0MRW6;Q9H6R4;Q9H6R4-2;Q9H6R4-4	0	1	0	0	0	0	0	0	0	0	0
A0A0A0MRX1;A0A0R4J2E6;A0A494C0F8;A0A494C147;A0A494C1D9;B1APY9;P26378;P26378-1;P26378-2;P26378-3;P26378-4;P26378-5;Q12926;Q12926-2	0	0.258368	0.395949	0	0	0	0	0	0.345684	0	0
A0A0A0MRX8;A0A1B0GWI9;A0A1B0GWJ4;A0A2R8Y7V8;O00712;O00712-4;O00712-5;Q5VW26;Q5VW27;Q5VW30;U3KQE8	0	1	0	0	0	0	0	0	0	0	0
A0A0A0MRY0;B0QYI1;Q8WUA7;Q8WUA7-2;Q8WUA7-3;Q8WUA7-4	0	0	0	0	0	0	1	0	0	0	0
A0A0A0MRZ1;Q9H9P5-1;Q9H9P5-3	1	0	0	0	0	0	0	0	0	0	0
A0A0A0MRZ4;E7EMV7;Q15025;Q15025-2;Q15025-3;Q15025-4;Q15025-5;Q15025-6;Q15025-7;Q15025-8	1	0	0	0	0	0	0	0	0	0	0
A0A0A0MS59;A0A0C4DFX4;Q6ZRS2;Q6ZRS2-2;Q6ZRS2-3	0	1	0	0	0	0	0	0	0	0	0
A0A0A0MS79;O14513	0	1	0	0	0	0	0	0	0	0	0
A0A0A0MS87	0	0	0	0	0	0	1	0	0	0	0
A0A0A0MS98;P02730;P02730-2	0	0	0	0	0.406382	0	0	0	0	0	0.593618
A0A0A0MS99;I3L4X2;P33527;P33527-2;P33527-3;P33527-5;P33527-9	0	0	0	0	0.531137	0	0	0	0	0	0.468863
A0A0A0MSA9;A0A0C4DG49;P15151;P15151-2;P15151-3;P15151-4	0	0	0	0	0	0	0	0	0	0.433301	0.566699
A0A0A0MSB4;Q6ZN50;Q969R2;Q969R2-2;Q969R2-3;Q969R2-6	0	0	0	0	0	0	0	0	0	0	1
A0A0A0MSB8;Q9UPT5;Q9UPT5-1;Q9UPT5-2;Q9UPT5-5;Q9UPT5-6	0	0	0	1	0	0	0	0	0	0	0
A0A0A0MSD0;Q4LDE5;Q4LDE5-3	0	0	0	0	0	0	0	0	1	0	0
A0A0A0MSE3;D3DNG8;P30556	0	0	0	0	0.48033	0	0	0	0	0	0.51967
A0A0A0MSG0;A6NGB9	0	0	0	0	0	0	0.721067	0	0.278933	0	0
A0A0A0MSH9;A0A494C1F7;A0A494C1P7;Q86WJ1;Q86WJ1-2;Q86WJ1-4	0	0.475232	0	0	0	0.524768	0	0	0	0	0
A0A0A0MSI2;B3KPJ4;Q8IXK0;Q8IXK0-2;Q8IXK0-3;Q8IXK0-4;Q8IXK0-5	0.378686	0	0	0	0	0	0.621314	0	0	0	0
A0A0A0MSI6;B7Z1P2;Q9H4M3;Q9H4M3-2	0	0	0	0	0	0.263272	0	0	0.736728	0	0
A0A0A0MSI8;O00471
A0A0A0MSJ9;Q15283;Q15283-2	0	0	0	0	0	0	0	0	0.472915	0	0.527085
A0A0A0MSK3;A0A0C4DH47;A0A498U6I9;C9JS68;P24557;P24557-2;P24557-3;P24557-4;Q53F23	0	0	0	0	0	0	0	0	0	0	1
A0A0A0MSK6;Q13017;Q13017-2
A0A0A0MSL1;Q8TDM6;Q8TDM6-2;Q8TDM6-3;Q8TDM6-4	0	0	0	0	0.695343	0	0	0	0	0	0.304657
A0A0A0MSM0	0	0.250286	0	0	0	0.380052	0	0	0.369662	0	0
A0A0A0MSP4;Q86WC4	0	0	0	0	0	0	0	0	0	0.591623	0.408377
A0A0A0MSQ0;P13797;P13797-2	0	0	0	0	0	0	1	0	0	0	0
A0A0A0MSS0;P60880	0	0	0	0	0	0	0	0	0	0	1
A0A0A0MSS7	0	0.22166	0	0	0	0	0	0.535213	0	0	0.243127
A0A0A0MSS8;P42330	0	0	0	0	0	0	1	0	0	0	0
A0A0A0MST8;C9JRP1;E9PFN4;Q9Y6M7;Q9Y6M7-12;Q9Y6M7-13;Q9Y6M7-2;Q9Y6M7-6;Q9Y6M7-7;Q9Y6M7-8;Q9Y6M7-9	0	0	0	0	0	0	0	0	1	0	0
A0A0A0MSU4;O94911-3	0	0	0	0	0	0	0	0	0	0.501113	0.498887
A0A0A0MSV9;A0A0G2JH37;A0A0G2JKZ1;A2AB90;O15533;O15533-2;O15533-3	0	0	0	0	1	0	0	0	0	0	0
A0A0A0MSX9;P41252	1	0	0	0	0	0	0	0	0	0	0
A0A0A0MSY7;O00142;O00142-4;O00142-6	0	0	0	0	0	0	0	1	0	0	0
A0A0A0MSZ9;Q05048	0	1	0	0	0	0	0	0	0	0	0
A0A0A0MT02;A2ABK4;P18615;P18615-3	0	1	0	0	0	0	0	0	0	0	0
A0A0A0MT16;Q86UQ4;Q86UQ4-3;Q86UQ4-4	0	0.213149	0	0	0	0	0	0.394098	0	0	0.392753
A0A0A0MT32;P38571;P38571-2
A0A0A0MT35;A0A2P0CTB1;Q8TBF2;Q8TBF2-3
A0A0A0MT61;G5E979;H7BYM2;Q8WYN0;Q8WYN0-3;Q8WYN0-5	0	0	0	1	0	0	0	0	0	0	0
A0A0A0MT72;C9JUH3;Q9BSQ5;Q9BSQ5-2;Q9BSQ5-3	0.393752	0	0.166389	0	0	0.216142	0	0	0.223718	0	0
A0A0A0MT83;P26440	0	0	0	0	0	0	0	1	0	0	0
A0A0A0MT93	0	0.776812	0	0	0	0	0	0	0	0	0.223188
A0A0A0MTC2;D6RA37;D6RDV0;D6RIY7;Q13454;Q13454-2	0	0	0	0	0.459791	0	0	0.334551	0	0	0.205658
A0A0A0MTG5;P13232;P13232-2;Q5FBX5	0	0.235239	0	0.285935	0	0	0	0	0	0	0.478825
A0A0A0MTH3	0	0	0	1	0	0	0	0	0	0	0
A0A0A0MTH9;O14981	0	1	0	0	0	0	0	0	0	0	0
A0A0A0MTJ9;Q6PIU2;Q6PIU2-2	0	0	0	0	1	0	0	0	0	0	0
A0A0A0MTK0;A0A0A0MTP0;F5GWB1;Q7Z6B0;Q7Z6B0-2	0	0	0	0	0	0	1	0	0	0	0
A0A0A0MTK4;A0A1B0GTZ1;Q8NB59;Q8NB59-2;Q8NB59-3;Q8NB59-5;Q8NB59-6;Q8NB59-7	0	0	0	0	0	0	0	0.419662	0.580338	0	0
A0A0A0MTL6;Q6ZS17;Q6ZS17-2;Q6ZS17-3;Q6ZS17-4	0	0	0	0	0	1	0	0	0	0	0
A0A0A0MTL7;A0A0D9SGH8;C6ZRJ6;C6ZRJ7;C6ZRK5;E2GH26;Q5JRY3;Q5JRY4;Q5JRY5;Q5VVR7;Q9NQB0;Q9NQB0-10;Q9NQB0-11;Q9NQB0-12;Q9NQB0-13;Q9NQB0-14;Q9NQB0-15;Q9NQB0-16;Q9NQB0-17;Q9NQB0-2;Q9NQB0-3;Q9NQB0-4;Q9NQB0-5;Q9NQB0-6;Q9NQB0-7;Q9NQB0-8;Q9NQB0-9	0	1	0	0	0	0	0	0	0	0	0
A0A0A0MTN0;Q13617;Q13617-2	0.302165	0	0	0	0	0	0.697835	0	0	0	0
A0A0A0MTN3	0.55019	0	0.44981	0	0	0	0	0	0	0	0
A0A0A0MTP7;F8VXG7;Q99590;Q99590-2	0	1	0	0	0	0	0	0	0	0	0
A0A0A0MTQ3;Q96N23;Q96N23-2	0	0	0	0	0	0	0	0.697791	0	0	0.302209
A0A0A0MTQ8;P0C221	0	0	0	0.37287	0	0	0	0.251554	0.375577	0	0
A0A0A0MTR7;Q63HN8	0.414466	0	0	0	0	0.301659	0	0	0.283875	0	0
A0A0A0MTS7;Q8WZ42;Q8WZ42-12;Q8WZ42-13;Q8WZ42-2;Q8WZ42-8	0	0.293145	0	0	0	0	0	0.706855	0	0	0
A0A0A0MTS9;K7EKZ0;K7EP24;K7ER94;Q2V2M9;Q2V2M9-2;Q2V2M9-3;Q2V2M9-4	0.504695	0	0	0	0	0	0	0	0	0	0.495305
A0A0A0MTU3;Q4ZIN3;Q4ZIN3-2	0	0	0	0	1	0	0	0	0	0	0
A0A0A6YYA0;Q86XR7-2;Q9Y3B3;Q9Y3B3-2	0	0	0	0	0.555285	0	0	0	0.444715	0	0
A0A0A6YYC0;E9PJN1;O75676;O75676-2	0.646553	0	0	0	0	0	0	0	0.353447	0	0
A0A0A6YYC7;Q96JP5;Q96JP5-2	0	0	0	0	0	0	1	0	0	0	0
A0A0A6YYG9;F8WCF6;F8WDD7;P59998;P59998-2;P59998-3	0	0	0	0	0	0	1	0	0	0	0
A0A0A6YYH1;Q7Z6K5;Q7Z6K5-2	0	0	0	0	0	0	1	0	0	0	0
A0A0A6YYI3;A0A0B4J1V8;A8MV53;Q9NQ55;Q9NQ55-2;Q9NQ55-3	0	0.738779	0	0	0	0	0	0	0	0	0.261221
A0A0A6YYL2;P0DMM9;P0DMM9-3;P0DMN0	0	0	0	0	0	0	1	0	0	0	0
A0A0A6YYL4;P57737-3	0	0	0	0.317776	0	0	0	0.682224	0	0	0
A0A0B4J1R2;Q9H6R3	0	0	0	0	0	0	0	1	0	0	0
A0A0B4J1R4;P32754	0	0	0	0	0	0	1	0	0	0	0
A0A0B4J1R7;Q96B45
A0A0B4J1S8;Q9UBF8;Q9UBF8-2;Q9UBF8-3	0.585324	0	0	0	0	0.414676	0	0	0	0	0
A0A0B4J1W0;B9TX62;F5GY88;H0YEG1;O75448;O75448-2	0	0.820959	0	0	0	0	0	0	0	0	0.179041
A0A0B4J1Y2;Q8NDW8;Q8NDW8-3;Q8NDW8-5;Q8NDW8-6;Q8NDW8-7	0	0	0	0	0.666815	0	0	0.333185	0	0	0
A0A0B4J1Z1;C9JAB2;Q16629;Q16629-2;Q16629-3;Q16629-4	0	1	0	0	0	0	0	0	0	0	0
A0A0B4J221;E9PR99;Q96LU5	0	0	0	0	0	0	0	1	0	0	0
A0A0B4J269
A0A0B4J291;Q8N8U2	0	0	0	0	0	0	0	0	1	0	0
A0A0B4J294;H3BP13;Q9UL33;Q9UL33-2	0.381709	0	0	0	0	0	0.618291	0	0	0	0
A0A0B4J297;I3L4V0;Q9BRA0;Q9BRA0-2	0	0	0	0	1	0	0	0	0	0	0
A0A0B4J2A0	0	0	0	0	0	0	1	0	0	0	0
A0A0B4J2C2;F8WF49;Q9Y2H0;Q9Y2H0-1;Q9Y2H0-3	0	0	0	0	0	0	1	0	0	0	0
A0A0B4J2C3;J3KPG2;P13693;Q5W0H4	0	0	0	0	0	0	1	0	0	0	0
A0A0B4J2D5;P0DPI2	0	0	0	0	0	0	0	1	0	0	0
A0A0B4J2E5;Q15269	0	0.763448	0	0	0	0	0	0	0.236552	0	0
A0A0B4J2F0	0	0	0	0	0	0	0	1	0	0	0
A0A0B4J2F8;E2QRJ6;F6S314;P52435	0	1	0	0	0	0	0	0	0	0	0
A0A0B4J2G4;Q15345;Q15345-3	0	1	0	0	0	0	0	0	0	0	0
A0A0C3SFZ9;M0QXD1;M0QY09;M0QZE1;M0QZI3;M0R1K4;M0R3E5;O14526;O14526-2;O14526-3	0	0	0	0	0	0	0	0	1	0	0
A0A0C4DFL7;Q16850	0	0	0	0	1	0	0	0	0	0	0
A0A0C4DFL8;F5GX28;O94953	0	1	0	0	0	0	0	0	0	0	0
A0A0C4DFM1;Q92544	0	0	0	0	0	0.339539	0	0	0.660461	0	0
A0A0C4DFM7;Q5TAX3
A0A0C4DFP6;Q5T4F6;Q9NQ79;Q9NQ79-2;Q9NQ79-3	0	0	0	0	0	0	0	1	0	0	0
A0A0C4DFR1;O75069;O75069-2;O75069-3;O75069-5	0.691089	0.308911	0	0	0	0	0	0	0	0	0
A0A0C4DFU4;Q9HBG7-4	1	0	0	0	0	0	0	0	0	0	0
A0A0C4DFV0;Q9H469	0.458348	0	0	0	0	0	0.541652	0	0	0	0
A0A0C4DFW4;Q5JUR7	0	0.413791	0	0.310415	0	0	0	0	0	0	0.275794
A0A0C4DFX9;Q9H3P2	0	0.514088	0	0	0	0	0	0.485912	0	0	0
A0A0C4DFY5;A8MXZ4;J9JIE0;Q9NQ84;Q9NQ84-2	0	0	0	0	0	0	0	0	0	0.408962	0.591038
A0A0C4DFY7;Q6UWW8;Q6UWW8-2	0	0	0	0	0.412873	0	0	0	0	0	0.587127
A0A0C4DFZ2;P15289;P15289-2
A0A0C4DG02;F8WE91;Q9Y6K1;Q9Y6K1-2	0	1	0	0	0	0	0	0	0	0	0
A0A0C4DG17;C9J9K3;P08865	0	0	0	0.286505	0.3887	0	0	0.324795	0	0	0
A0A0C4DG26;Q9NP71;Q9NP71-2;Q9NP71-3;Q9NP71-4;Q9NP71-6	0.673812	0	0	0	0	0.326188	0	0	0	0	0
A0A0C4DG40;Q8NF91;Q8NF91-4	0	1	0	0	0	0	0	0	0	0	0
A0A0C4DG51;Q9NP80;Q9NP80-3	0	0	0	0.39555	0	0	0	0.60445	0	0	0
A0A0C4DG60;F8W7P9;Q9H903;Q9H903-1;Q9H903-3;Q9H903-5	0	0.355341	0.644659	0	0	0	0	0	0	0	0
A0A0C4DG62;F5GYV5;F8WCT1;H7BZV4;Q66PJ3;Q66PJ3-2;Q66PJ3-3;Q66PJ3-4;Q66PJ3-7	0	1	0	0	0	0	0	0	0	0	0
A0A0C4DG80;Q9P2N7;Q9P2N7-2;Q9P2N7-3;Q9P2N7-4;Q9P2N7-5	0	0	0	0	0	0	0	0	1	0	0
A0A0C4DG85;P40394;P40394-2	0	0	0	0	0	0	1	0	0	0	0
A0A0C4DG88;P14859;P14859-2;P14859-3;P14859-4;P14859-5;P14859-6	0	0.616442	0	0	0	0	0	0	0.383558	0	0
A0A0C4DG89;Q7L014	0	1	0	0	0	0	0	0	0	0	0
A0A0C4DG90;A4D0S4;A4D0S4-3	0	0.720038	0	0	0	0	0	0	0	0	0.279962
A0A0C4DG91;A0A2R8Y7V2;C9J9V6;C9JQB1;O75414	0	0	0	0	0	0	0	1	0	0	0
A0A0C4DG94	0	0	0.384815	0	0.615185	0	0	0	0	0	0
A0A0C4DG95;C9IYJ2;E9PD56;F8WDF7;H7BYG4;Q7Z7A4;Q7Z7A4-2;Q7Z7A4-4;Q7Z7A4-6;W5RWE6	0	0.4883	0	0	0	0	0	0	0.238216	0	0.273483
A0A0C4DGA2;O75521;O75521-2	0	0	0	0	0	0	0	1	0	0	0
A0A0C4DGA6;Q14527;Q14527-2	0	0.680787	0	0	0	0	0	0	0	0	0.319213
A0A0C4DGA7;O94929;O94929-3	0	0.577273	0	0	0	0	0	0	0	0	0.422727
A0A0C4DGB0;Q9UIL1;Q9UIL1-2;Q9UIL1-3	0	0	0	0	0	0	1	0	0	0	0
A0A0C4DGB9	0	0	0	0	0	0	0	1	0	0	0
A0A0C4DGE4;A0A0J9YW33;A0A286YF28;Q13277;Q13277-2;Q13277-3	0	0.237586	0	0	0	0	0	0	0	0.32985	0.432564
A0A0C4DGE6;A0A0G2JNY3;A0A0G2JRG8;E9PIR1;E9PNT2;Q6ZUM4;Q6ZUM4-2;Q6ZUM4-3	0	0	0	0	0	0	0	0	0.626381	0	0.373619
A0A0C4DGE7;Q86UK5;Q86UK5-2;Q86UK5-3	0	0.371192	0	0	0	0	0.628808	0	0	0	0
A0A0C4DGF7;Q6UXC1;Q6UXC1-2;Q6UXC1-3	0	0	0	0.314189	0	0	0	0.685811	0	0	0
A0A0C4DGG1;Q9UKS6	0	0	0	0	0	0	0	0	0	0.491444	0.508556
A0A0C4DGG9;A0A2R8Y212;A0A2R8Y425;A0A2R8Y521;A0A2R8Y5J0;A0A2R8YFK9;A0A2U3TZM0;F5GWX5;Q14839;Q14839-2	0	1	0	0	0	0	0	0	0	0	0
A0A0C4DGH0;Q5ZPR3;Q5ZPR3-3;Q5ZPR3-4	0	0	0	0	0.40916	0	0	0	0	0.24257	0.34827
A0A0C4DGH6;A0JNW5	0.448143	0	0	0	0	0.214848	0	0	0.337009	0	0
A0A0C4DGI4	0	0	0	0.377519	0	0	0	0	0	0	0.622481
A0A0C4DGM9;B7Z896;F5H3M2;Q9BVG8;Q9BVG8-2;Q9BVG8-4;Q9BVG8-5;Q9BVG8-6	0	0	0	0	0	0	0	0.298301	0	0.34788	0.353819
A0A0C4DGN6;J3QRU8;Q9Y2X7;Q9Y2X7-3	0	0	0	0.260427	0	0	0	0.739573	0	0	0
A0A0C4DGP0;E7EU35;Q9UKF7-2	0	0	1	0	0	0	0	0	0	0	0
A0A0C4DGQ4;Q86W25	0	0	1	0	0	0	0	0	0	0	0
A0A0C4DGQ5;P04632	0	0	0	0	0	0	1	0	0	0	0
A0A0C4DGQ8;Q6IAN0	0	0	0	0	1	0	0	0	0	0	0
A0A0C4DGR2;M0QY25;M0QYH7;M0QYQ4;M0QZQ2;Q71SY5;Q71SY5-4;Q71SY5-5;Q71SY5-6;Q86YD1;Q86YD1-2	0	1	0	0	0	0	0	0	0	0	0
A0A0C4DGR5	0	0	0	0	0	0	0	0	0.535179	0	0.464821
A0A0C4DGS1;P39656;P39656-3	0	0	0	0	0.436252	0	0	0.563748	0	0	0
A0A0C4DGV4;E9PLX3;O43504;R4GMU8
A0A0C4DGZ4;Q9Y5U4	0	0	0.214112	0	0.350504	0	0	0	0.232663	0	0.202721
A0A0C4DH01;Q9NVU0;Q9NVU0-2;Q9NVU0-3;Q9NVU0-4;Q9NVU0-5	0.422151	0	0.330564	0	0	0.247285	0	0	0	0	0
A0A0C4DH07;Q8N2S1;Q8N2S1-2;Q8N2S1-3	0	0	0	0	0.539772	0	0	0	0	0	0.460228
A0A0C4DH13;E5RG96;J3KQJ9;Q8N2E2	0	0	0	0	0	0	0	0	1	0	0
A0A0C4DH16;B8ZZS0;H7BXT7;Q9NYM9	0	0	0	0	0	0.241247	0	0	0.758753	0	0
A0A0C4DH36	0.536298	0	0	0	0	0	0	0.463702	0	0	0
A0A0D2X7Z3;Q49AN0;Q49AN0-2	0.469021	0	0	0	0	0	0	0	0.530979	0	0
A0A0D5XQ77;A0A0U5Q247;A0A140T8Z5;A0A140T981;A0A140T9R6;A0A140T9Y4;A0A140T9Z9;A0A140TA15;P01920;Q29967	0	0	0	0	0.666932	0	0	0	0	0	0.333068
A0A0D9SEI0;Q9P0P8	0	0	0	0	0	0	0	1	0	0	0
A0A0D9SEI3;A0A0D9SEN2;A0A0D9SER5;P21127;P21127-2;P21127-3;P21127-8	0	1	0	0	0	0	0	0	0	0	0
A0A0D9SEJ5;F5GY05;Q96EK7;Q96EK7-2	0	0	0	0	0	0	0	0.492405	0.507595	0	0
A0A0D9SEK1	0	0	0.428981	0	0	0	0	0.254456	0.316563	0	0
A0A0D9SEN7;A0A2R8Y7Z3;I3L0L0;Q13950;Q13950-2;Q13950-3	0	1	0	0	0	0	0	0	0	0	0
A0A0D9SES8;H0YKN8;H0YKT5;H0YL70;H0YNI7;H0YNT2;Q04724;Q04726;Q04726-2;Q04726-3;Q04726-4;Q04726-5;Q04726-6;Q04726-7;Q04727;Q04727-2;Q04727-3;Q04727-4	1	0	0	0	0	0	0	0	0	0	0
A0A0D9SET2;A0A0D9SFD0;A0A0D9SGI5;A0A0R4J2G5;A0A1B0GTW4;A0A1B0GV32;D6R942;D6RB91;D6RC63;D6RCM6;D6RG14;D6RG21;D6RJA7;D6RJG6;D8L7E9;H0YM62;Q02078;Q02078-2;Q02078-3;Q02078-4;Q02078-5;Q02078-6;Q05BX2;Q06413;Q06413-2;Q06413-3;Q06413-4;Q06413-5;Q06413-6;Q14814;Q14814-2;Q14814-3;Q14814-4;Q14814-5;Q14814-6	0	1	0	0	0	0	0	0	0	0	0
A0A0D9SEU5;Q6VN20;Q6VN20-3;R4GMX8	1	0	0	0	0	0	0	0	0	0	0
A0A0D9SEX5;Q9H6R6;Q9H6R6-2	0	0	0.230412	0	0.382417	0	0	0	0.387171	0	0
A0A0D9SEY1;E7EN19;E7ENQ1;G3XAA2;G5E948;H7C360;O95819;O95819-2;O95819-3;O95819-4;O95819-5;O95819-6
A0A0D9SF07	0	0	0	0	0	0	0	1	0	0	0
A0A0D9SF44;A0A0R4J2E2;Q9Y3T6;Q9Y3T6-3	0.56219	0	0	0	0	0	0	0	0.43781	0	0
A0A0D9SF53;A0A0D9SFB3;A0A0D9SG12;A0A2R8Y4A4;A0A2R8Y645;A0A2R8YCW1;A0A2R8YF78;A0A2R8YFR4;A0A2R8YFS5;A0A2U3TZJ9;O00571
A0A0D9SF60;Q99569;Q99569-2	0	0.238117	0	0.347546	0	0	0	0	0	0	0.414337
A0A0D9SF63;Q9BZK7	0	1	0	0	0	0	0	0	0	0	0
A0A0D9SFB1
A0A0D9SFB5;P08319;P08319-2	0	0	0	0	0	0	1	0	0	0	0
A0A0D9SFE1;Q9H936	0	0	0	0	0	0	0	1	0	0	0
A0A0D9SFG6;O43739;O43739-2;Q15438;Q15438-2;Q15438-3;Q99418;Q99418-2	1	0	0	0	0	0	0	0	0	0	0
A0A0D9SFJ2;A0A1B0GWF1;A0A2R8Y5Y4;A0A2R8Y6P1;Q6ZU35	0	0.315079	0	0.363796	0	0	0	0.321125	0	0	0
A0A0D9SFK2;Q92614;Q92614-3;Q92614-4
A0A0D9SFM0;Q149N8;Q149N8-4	0	0	0	0	0	0	0	0.470897	0.529103	0	0
A0A0D9SFR6;Q16760;Q16760-2;Q86XP1;Q86XP1-2;Q86XP1-3;Q86XP1-5	0.672118	0.327882	0	0	0	0	0	0	0	0	0
A0A0D9SFT8	0	0	0.395892	0	0	0.370051	0	0	0	0	0.234057
A0A0D9SG52;Q6ZWI9	0	0	0	0	0	0	0	0	0.5129	0	0.4871
A0A0D9SG71;P49459;P49459-3	0.430534	0	0	0	0	0	0.569466	0	0	0	0
A0A0D9SG72;A0A1B0GTP9;A0A1B0GVQ5;A0A1B0GWF2;A0A2R8Y5D4;P61764;P61764-2	0	0	0	0	0.568356	0	0	0	0	0	0.431644
A0A0D9SG79;Q9NZ09;Q9NZ09-3;Q9NZ09-4	0	0	0	0	0	0	0	0	1	0	0
A0A0D9SG96;Q9ULB1-3	0.646305	0	0	0	0	0	0	0	0.353695	0	0
A0A0D9SGD6;B0QZE2;B7Z2J6;E7ENI9;E7EV75;Q15326;Q15326-2;Q15326-5	0	1	0	0	0	0	0	0	0	0	0
A0A0D9SGE8;Q5JRC6;Q8IWS0;Q8IWS0-2;Q8IWS0-3;Q8IWS0-4;Q8IWS0-5	0	0	0	0	0	0.327126	0	0	0.672874	0	0
A0A0D9SGF6;Q13813;Q13813-2	0	0	0	0.568701	0	0	0	0	0	0	0.431299
A0A0D9SGH0;A0A1B0GV11;Q92581;Q92581-2;Q92581-3	0	0	0	0	0	0.392932	0	0	0.607068	0	0
A0A0D9SGJ6;C9JFZ1;J3KPK1;J3KQV8;O43426;O43426-2;O43426-4	0	0	0	1	0	0	0	0	0	0	0
A0A0G2JH30;A0A0G2JPX0;A0A2R8YFP9;A6NK88;P49918;P49918-2	0	0	0	0	0	0	0	0	1	0	0
A0A0G2JH50;A0A0G2JIF0;A0A1W2PS56;A2BF26;Q5RIP0	0	0	0	0	0	0	0	0	0	0	1
A0A0G2JH68;O60610	0	0	0	0	0	0	1	0	0	0	0
A0A0G2JHC2;Q6NYC8	0	0	0	0.233999	0	0	0	0	0	0.323414	0.442588
A0A0G2JHJ2;Q92759;Q92759-2	0	1	0	0	0	0	0	0	0	0	0
A0A0G2JHL0;A0A0G2JK44;A0A140T9E9;A0A140T9F7;A0A140T9V2;H0Y6K2;P25440;P25440-2;P25440-3;U3KQA6	0	1	0	0	0	0	0	0	0	0	0
A0A0G2JI43;A0A0G2JIJ2;A0A140T926;A0A140T9C9;A0A140T9I2;A0A140T9R0;A0A140T9R2;A0A140T9T8;A0A140T9U6;F6UB75;P28068	0	0	0.467297	0	0	0	0	0	0.532703	0	0
A0A0G2JIR1;A0A0G2JIS2;A0A0G2JK64;A0A0G2JRN8;A0A0G2JRR0;A2ABF8;A2ABF9;Q96KQ7;Q96KQ7-2	0	1	0	0	0	0	0	0	0	0	0
A0A0G2JIW1;P0DMV8;P0DMV9	0	0	0	0	0	0	1	0	0	0	0
A0A0G2JJD3;O95870	0	0	0	0	1	0	0	0	0	0	0
A0A0G2JJP1;Q9C019
A0A0G2JL52;A0A140T8Y0;A0A140TA35;B4E0K6;Q5ST30;Q5ST30-4	0	0	0	0	0	0	0	1	0	0	0
A0A0G2JLC7	0.298209	0	0	0	0	0.196246	0	0	0.505544	0	0
A0A0G2JLK7	0	0	0	0	1	0	0	0	0	0	0
A0A0G2JLQ8;A0A0G2JLX3;A0A0G2JNC8;A0A0G2JP37;A0A0G2JPB6;A0A0G2JPQ2;F5H5B1;F5H7Q5;J3KN39;K7EJ90;K7ELX1;Q9NX02;Q9NX02-2;Q9NX02-3;Q9NX02-4	0	0.386794	0	0	0	0	0	0	0	0	0.613206
A0A0G2JM39;A0A0G2JN91;A0A0G2JNH1;M0QYD1	0	0.435901	0	0	0	0	0	0.564099	0	0	0
A0A0G2JM63;A0A0G2JNK3;A0A0G2JPH3;Q8WX94-2;Q8WX94-3	0	0	0.363263	0	0	0	0	0	0.636737	0	0
A0A0G2JM70;Q9NV79;Q9NV79-2;Q9NV79-3;V9GZ41	0	0	1	0	0	0	0	0	0	0	0
A0A0G2JMD2;A0A2R9YJI8	0	0	0	0	1	0	0	0	0	0	0
A0A0G2JMW3;A0A0G2JP44;Q9HBB8;Q9HBB8-2;Q9HBB8-4	0	1	0	0	0	0	0	0	0	0	0
A0A0G2JMX7;A0A0G2JPD5;A0A0G2JQJ7;A0A0G2JS76;P10636;P10636-6;P10636-7;P10636-8;P10636-9
A0A0G2JMZ6;O60282	0	0	0	1	0	0	0	0	0	0	0
A0A0G2JMZ8;Q16625	0	0.237989	0	0	0	0	0	0	0	0.391773	0.370238
A0A0G2JN23;A0A0G2JQ38	0	0.569829	0	0	0	0	0	0	0	0	0.430171
A0A0G2JN42;A0A0G2JNJ8;Q6W4X9	0	0	0	0	0	0	0	0	1	0	0
A0A0G2JN53	0	0	0	0	0	0	0	1	0	0	0
A0A0G2JN84;P59817	0.745796	0	0	0	0	0	0	0	0.254204	0	0
A0A0G2JNW7;Q9Y666	0	0	0	0	0.501541	0	0	0	0	0	0.498459
A0A0G2JNZ2;A0A669KB89;Q14160	0	0	0	0.563094	0	0	0	0	0	0	0.436906
A0A0G2JPC8;B4DTC2;E7EPX8;E7ER82;Q8TC27	1	0	0	0	0	0	0	0	0	0	0
A0A0G2JPQ3;P17693;P17693-5;Q5RJ85;Q8MH48	0	0	0	0	0	0	0	0	0	0.405946	0.594054
A0A0G2JPZ6;A0A0J9YWU2;Q9H3Q3	0	0	0	0	0.443235	0	0	0.556765	0	0	0
A0A0G2JQC6;A0A0G2JQK9;A0A0G2JRT1;E7EWN1;Q99102-3	0	1	0	0	0	0	0	0	0	0	0
A0A0G2JQT1;A0A0G2JR96	0	0	0	0	0	0	0	0.341549	0.304502	0	0.353949
A0A0G2JRG1	0	0	0	0	0	0	0	1	0	0	0
A0A0G2JS52;Q01538;Q01538-2	0	0.664482	0	0	0	0	0	0	0.335518	0	0
A0A0J9YVP6;Q9UHX1-2	0	1	0	0	0	0	0	0	0	0	0
A0A0J9YVW4	0.575757	0	0.424243	0	0	0	0	0	0	0	0
A0A0J9YW18;F6RP06;Q12983	0	0	0	0	0	0	0	1	0	0	0
A0A0J9YW36;A0A0J9YXY4;Q9NZ72;Q9NZ72-2	0	0.606104	0	0	0	0	0	0.393896	0	0	0
A0A0J9YW63	0	0	0	0.372223	0	0	0	0	0.627777	0	0
A0A0J9YWD2;A0A0J9YX19;A0A0J9YXY6;A0A0J9YYK8;A0A1B0GTJ5;A0A1B0GU79;A0A1B0GUR8;A0A1B0GVR1;Q9UBY8	0	0	0	0	1	0	0	0	0	0	0
A0A0J9YWD5;A0A0J9YX88;A0A0J9YYB5;B7ZM65;E9PJ24;F8WEF5;Q9P1Y6;Q9P1Y6-2;Q9P1Y6-3	0	1	0	0	0	0	0	0	0	0	0
A0A0J9YWE1;A0A0J9YWN0	0	0	0.255799	0	0	0	0	0	0.455334	0	0.288867
A0A0J9YWL0;Q9Y4K1	0	0.222708	0	0	0	0	0	0.354179	0	0	0.423113
A0A0J9YWR7;A0A0J9YXE4;Q8N2F6;Q8N2F6-2;Q8N2F6-3;Q8N2F6-4	0	0	0	0	0	0	0	1	0	0	0
A0A0J9YWV4;O75154;O75154-2;O75154-3;X6RFI8	0	0	0	0	0	0	1	0	0	0	0
A0A0J9YX34;A0A6Q8PEY7;A0A6Q8PF18;A0A6Q8PF63;A0A6Q8PF74;A0A6Q8PFB0;A0A6Q8PFI4;A0A6Q8PFM2;A0A6Q8PFS5;A0A6Q8PFV0;A0A6Q8PFX3;A0A6Q8PG16;A0A6Q8PGE9;A0A6Q8PGG4;A0A6Q8PGL5;A0A6Q8PH06;A0A6Q8PHE9;A0A6Q8PHG4;A0A6Q8PHP4;A0A6Q8PHR6;C9J084;Q9C040;Q9C040-2	0	0	0	0	0	0	0	0	0	0	1
A0A0J9YX62;C9J2C4;O75190;O75190-2;O75190-3	0	1	0	0	0	0	0	0	0	0	0
A0A0J9YX66;A0A0J9YXJ0;A0A1B0GU44;A0A1B0GUN8;E9PC62;O95319;O95319-2;O95319-3;O95319-4;O95319-5;Q5VZZ6;V9GYD9	0	1	0	0	0	0	0	0	0	0	0
A0A0J9YXF2;Q15165;Q15165-1	0	0	0	0	1	0	0	0	0	0	0
A0A0J9YXM6;Q562E7	0.678818	0	0	0	0	0.321182	0	0	0	0	0
A0A0J9YXN7	0	0	1	0	0	0	0	0	0	0	0
A0A0J9YXT0;H7C5H6;Q9H0F7;Q9H0F7-2
A0A0J9YY17;A0A1C7CYW8;A0A669KB38;Q8IVF4	0	0	0	1	0	0	0	0	0	0	0
A0A0J9YY72;A0A1W2PQQ1;Q5HYW2	0	0	0	0	0	0	0	0	0	0	1
A0A0J9YYF0	0	1	0	0	0	0	0	0	0	0	0
A0A0J9YYF7;Q86T65;Q86T65-4	0	0	0	0	0.661545	0	0	0	0	0.338455	0
A0A0K0K1A5	0.696938	0	0	0	0	0	0	0	0.303062	0	0
A0A0R4J2E8;D6REM6;P43243	0	1	0	0	0	0	0	0	0	0	0
A0A0R4J2F3;P0DPB6	0	1	0	0	0	0	0	0	0	0	0
A0A0R4J2F6;Q12894;Q12894-2
A0A0S2Z4L3;A0A3B3ISJ1;G5E9F8;P07225	0	0	0.2173	0	0.7827	0	0	0	0	0	0
A0A0S2Z4L7;O60603	0	0	0	0	0	0	0	0	0.447589	0	0.552411
A0A0S2Z4Q7;A0A1W2PQQ6;A0A1W2PQR0;A0A1W2PR45;A0A1W2PRC6;A0A1W2PRD9;A0A1W2PRY1;A0A1X7SBT2;C9JYS9;Q9UNP4;Q9UNP4-2;Q9UNP4-3	0	0	0	0	0	0	0	0	1	0	0
A0A0S2Z5D0;A0A1B0GTU6;H3BUV4;Q9NWW5;Q9NWW5-2	0	0	0	0	0.66633	0	0	0	0	0	0.33367
A0A0U1RQC7	0	0	0	0	0	0	0	0	0	0	1
A0A0U1RQE4;A0A494C1M0;Q5HYK7;Q5HYK7-2;Q5HYK7-3	0	0	0	0	0	0	1	0	0	0	0
A0A0U1RQK7
A0A0U1RQK9	0	0	0	0	0	0	0	1	0	0	0
A0A0U1RQQ9;Q6P3W7
A0A0U1RQS4;A0A0U1RR93;Q9BYB0;Q9BYB0-3	0	0	0	0.535041	0	0	0	0	0	0	0.464959
A0A0U1RQT8;Q8TCZ2;Q8TCZ2-2;Q8TCZ2-3;Q8TCZ2-5	0	0	0	0	0	0	0	0	0	0.36072	0.63928
A0A0U1RQW3;Q8WXE1;Q8WXE1-2	0	0	0	0	0	0	0	0	0.562179	0	0.437821
A0A0U1RQW6;E7EPU2;Q9Y2E4	0	0	1	0	0	0	0	0	0	0	0
A0A0U1RQY4	0	0	0	0	0.49342	0	0	0	0.50658	0	0
A0A0U1RR06;Q9Y484;Q9Y484-2;Q9Y484-3	0	0	1	0	0	0	0	0	0	0	0
A0A0U1RR16;A0A3B3IRZ7;Q8NEY4;Q8NEY4-2
A0A0U1RR25	0	0	0.441227	0	0	0	0	0	0.558773	0	0
A0A0U1RR27;H3BTW5;Q7Z401;Q7Z401-2	1	0	0	0	0	0	0	0	0	0	0
A0A0U1RR32;A0A0U1RRH7;P0C0S8;P20671;Q96KK5;Q99878;Q9BTM1	0	1	0	0	0	0	0	0	0	0	0
A0A0U1RR76;A6NJ78;A6NJ78-2;A6NJ78-4;P0C7V9	0	0	0	0	0	0	0	1	0	0	0
A0A0U1RRA6;B5MCG9;B5MCU0;H7C0E9;Q9Y2K5	0	0	0	0	0	0	1	0	0	0	0
A0A0U1RRB6;J3QT38;Q9Y2D4;Q9Y2D4-2	0	0	0	0.595859	0	0	0	0	0	0	0.404141
A0A0U1RRB9;F2Z2V1;Q96C11;Q96C11-3	0	0	0	0	0	0	1	0	0	0	0
A0A0U1RRK1;A0A286YF11;F6XEV2;Q9BPX6;Q9BPX6-3	0	0	0	0.285804	0	0	0	0.714196	0	0	0
A0A0U1RRL7	0	0.288691	0	0	0	0	0	0.711309	0	0	0
A0A0U1RRL8;Q8TB22;Q8TB22-2;Q8TB22-3	0	0	0	0	0	0	0	1	0	0	0
A0A0U1RRM1;Q8WXI9	0	0.71258	0	0	0	0	0	0	0.28742	0	0
A0A126GWB3;P47888	0	0	0	0.302204	0	0	0	0	0.697796	0	0
A0A126GWF9;A0A2C9F2Y1;B2RN74;Q8NG94;Q8NH07;Q8NH93	0	0	0	0.362442	0	0	0	0	0	0	0.637558
A0A140LJL2;Q8N350	0	0	0	0	0	0	0	0	0	0	1
A0A140T8Y3;A0A140T902;A0A140T9C0;A0A140TA33;A0A140TA41;A0A140TA52;A0A3B3ISX9;P22105;P22105-1;P22105-4	0	1	0	0	0	0	0	0	0	0	0
A0A140T913;A0A140T933;A0A140T955;A0A140T9I0;A0A140T9X5;A0A1W2PRT9;Q53Z42	0	0	0	0	0.489045	0	0	0	0	0.257666	0.253289
A0A140T951	0	0	0	0	0	0	0	0	0	0.452484	0.547516
A0A140T962;A0A140T9B3;A0A140T9J9;A0A1W2PR11;Q5QT33	0	0	0	0	0.646725	0	0	0	0	0.353275	0
A0A140T9G8;Q0P5T2;Q5SQH8;Q5SQH8-2;Q5SQH8-4	0	0	0	0	0	0	0	1	0	0	0
A0A140T9T7;Q03518	0	0	0	0	1	0	0	0	0	0	0
A0A140TA01;E9PQT8;E9PQZ5;O43189;O43189-2	0	0	0	0	0	0	0	0	0	0	1
A0A140TA09;Q99942	0	0	0.482154	0	0	0.517846	0	0	0	0	0
A0A140TA86;Q5XKP0	0	0	0.366311	0	0	0	0	0.633689	0	0	0
A0A182DWF2;A0A182DWF3;Q9NNW7;Q9NNW7-2	0	0	0	0	0	0	0	1	0	0	0
A0A182DWH7;P49908
A0A182DWI4;E9PN30;Q9BQE4	0	0	0.347913	0	0.652087	0	0	0	0	0	0
A0A1B0GTB0;A0A1B0GTU8;A0A1B0GU12;A0A1B0GUT7;A0A1B0GVB9;A0A1B0GVC7;A0A1B0GVW0;A0A1B0GWJ8;A0A1C7CYW4;B7Z413;H7C3E1;O75787;O75787-2	0	0	0	0	0.416743	0	0	0	0	0	0.583257
A0A1B0GTF3;A0A6I8PIT5;A0A6I8PIW1;A0A6I8PLB1;O43301	0	0	0.300731	0	0	0	0	0	0	0	0.699269
A0A1B0GTG2;A0A1B0GW77;P49419;P49419-2	0	0.291627	0	0	0	0	0	0.708373	0	0	0
A0A1B0GTH8;A0A1B0GUV4	0	0	1	0	0	0	0	0	0	0	0
A0A1B0GTJ7;A0A1B0GWJ0;P30566	0.305684	0	0	0	0	0	0.694316	0	0	0	0
A0A1B0GTJ8;A0A1B0GV63;A0A1B0GVK1;A0A1B0GWJ2;A0A3F2YNW7;A0A6Q8NVI4;H0Y7H8;Q8NFD5;Q8NFD5-2;Q8NFD5-3;Q8NFD5-4	0	1	0	0	0	0	0	0	0	0	0
A0A1B0GTK6	0	0	0	0	0	0	0	0	1	0	0
A0A1B0GTL7;A0A1W2PQ11;A0A1W2PQ86;A0A1W2PQJ4;Q02246	0	0	0	0	0	0	0	0	1	0	0
A0A1B0GTM1;A0A1B0GUM5;E7ETX0;Q8NHX9	0	0	1	0	0	0	0	0	0	0	0
A0A1B0GTM3;A0A1B0GUA4;A0A1B0GUH5;A0A1B0GW68;Q13510;Q13510-2	0	0.389472	0	0	0	0	0	0	0	0.610528	0
A0A1B0GTT2	0	0	0	0	0	0.302001	0	0	0.354831	0.343169	0
A0A1B0GTU4	0	0	0	1	0	0	0	0	0	0	0
A0A1B0GTU5;H0Y488;O14497;O14497-2;O14497-3	0	1	0	0	0	0	0	0	0	0	0
A0A1B0GTU7;H0YD36;P54098	0	0	0	0	0	0	0	1	0	0	0
A0A1B0GTV6	0	0.464437	0	0	0	0	0	0.535563	0	0	0
A0A1B0GTW1;A0A2R8YDH4;A0A3B3ITE1;Q9UDY2;Q9UDY2-3;Q9UDY2-7	0	0	0	1	0	0	0	0	0	0	0
A0A1B0GTX1;A0A1C7CYY6;Q6XZF7;Q6XZF7-2	0.602785	0.397215	0	0	0	0	0	0	0	0	0
A0A1B0GUA3;A0A6Q8PGG2;A0A6Q8PH45;A0A6Q8PHL8;Q96EK5	0	0	0	0	0	0	1	0	0	0	0
A0A1B0GUC2;A0A1W2PP33;C9J7I0	0	0	1	0	0	0	0	0	0	0	0
A0A1B0GUF4	0	0	0	0	0.579678	0	0	0	0.420322	0	0
A0A1B0GUG6;Q86WH2	0.403598	0	0.314233	0	0	0	0	0	0.282169	0	0
A0A1B0GUI1;Q6GYQ0;Q6GYQ0-2;Q6GYQ0-3;Q6GYQ0-4;Q6GYQ0-5;Q6GYQ0-6;Q6GYQ0-7	0	0	0	0	0	0	0	0	0.28519	0	0.71481
A0A1B0GUL3	0.492765	0	0	0	0	0	0	0	0	0	0.507235
A0A1B0GUN5	0	0.220101	0	0.396778	0	0	0	0	0	0	0.383121
A0A1B0GUN9	1	0	0	0	0	0	0	0	0	0	0
A0A1B0GUS7	0.726255	0	0.273745	0	0	0	0	0	0	0	0
A0A1B0GUZ2;P00797;P00797-2	0	0	0	0	0	0.398158	0	0	0.601842	0	0
A0A1B0GUZ7;Q14156;Q14156-2	0	0	0	0	0	0	0	0	0	0	1
A0A1B0GV26;Q8WWZ3;Q8WWZ3-2	1	0	0	0	0	0	0	0	0	0	0
A0A1B0GV47;Q7Z4S6;Q7Z4S6-2;Q7Z4S6-4;Q7Z4S6-5;Q7Z4S6-6
A0A1B0GV57;Q9NYJ8	0.559728	0	0	0	0	0	0	0	0.440272	0	0
A0A1B0GV71;A0A1B0GW34;A0A1B0GWD3;B4DFF3;H3BNK7;H3BR00;O95086;Q13286;Q13286-2;Q13286-3;Q13286-4;Q13286-5;Q13286-7;Q2TA70;Q9UBD8	0	0	0	0	0	0	0	0	1	0	0
A0A1B0GVD5;A0A1B0GVP3;A0A1B0GW44;A0A1B0GWE8;P07339	0	0	0	0	0	0	0	0	0	1	0
A0A1B0GVG4	0.423373	0	0	0	0	0.318776	0	0	0.25785	0	0
A0A1B0GVI7;A0A2R8Y7G1;P35869	1	0	0	0	0	0	0	0	0	0	0
A0A1B0GVL3;Q05086;Q05086-2;Q05086-3	1	0	0	0	0	0	0	0	0	0	0
A0A1B0GVV3;Q5EBL4	0	0	0	0	0	0	1	0	0	0	0
A0A1B0GVV8	0	0	0	0	0	0.597294	0	0	0.402706	0	0
A0A1B0GW05	0	0	1	0	0	0	0	0	0	0	0
A0A1B0GW23;Q03154	0	0	0	0	0	0	1	0	0	0	0
A0A1B0GW38
A0A1B0GW41;E9PEN0;Q8WYH8;Q8WYH8-2	0	1	0	0	0	0	0	0	0	0	0
A0A1B0GWB2	0	0.489067	0	0.223743	0	0	0	0	0	0	0.287189
A0A1B0GWD8;Q9C093-4	0	0	0.527526	0	0	0.472474	0	0	0	0	0
A0A1B0GWI2;O75503	0	0.229746	0	0	0	0	0	0	0	0.346945	0.423309
A0A1B0GXA9;C9JHJ7;Q04771	0	0	0	0	0	0	0	0	0	0	1
A0A1B1UZQ1;A0A3B3IRU7;A0A3B3ISJ6;A0A3F2YP58;A0A5F9ZHF9;A0A5F9ZI67;Q9Y233;Q9Y233-2	0.631721	0	0	0	0	0	0	0.368279	0	0	0
A0A1C7CYW7	0	0	0	0	0	0	0	0	1	0	0
A0A1C7CYX0	0	0	0	0	0.56467	0	0	0	0	0	0.43533
A0A1C7CYX8	0.441061	0	0	0	0	0	0.558939	0	0	0	0
A0A1C7CYX9	0	0	0	0	0	0	1	0	0	0	0
A0A1C7CYY4;I3L1K6;I3L532;P12829	0	0.537336	0	0	0	0	0	0	0.462664	0	0
A0A1D5RMN4;P23945;P23945-2;P23945-4	0	0.417328	0	0	0.582672	0	0	0	0	0	0
A0A1P0AYU5;Q9BWM7	0	0	0	0	0	0	0	1	0	0	0
A0A1W2PNF0;A0A1W2PNY6;A0A1W2PPE6;A0A1W2PPG9;A0A1W2PPH4;A0A1W2PQ13;A0A1W2PQ60;A0A1W2PQD6;A0A1W2PQH2;A0A1W2PQL8;A0A1W2PR66;A0A1W2PRN3;A0A1W2PRT7;A0A1W2PS45;A0A1W2PS77;A0A1W2PSA9;A0A1W2PSD1;Q9Y2D2;Q9Y2D2-2;Q9Y2D2-3	0	0	0	0	0.551934	0	0	0.448066	0	0	0
A0A1W2PNH8;A0A1W2PNQ8;A0A1W2PNR0;A0A1W2PNW5;A0A1W2PPB6;A0A1W2PPR7;A0A1W2PQA9;A0A1W2PQP4;A0A1W2PQZ1;A0A1W2PS19;K7ELE1;K7EPJ2;O95427	0	0	0	0	0	0	0	0.442438	0	0	0.557562
A0A1W2PNP0;Q969N2;Q969N2-5	0	0	0	0	1	0	0	0	0	0	0
A0A1W2PNR9;Q9Y5U9	0	0	0	0	0.683095	0	0	0	0	0.316905	0
A0A1W2PNT1	0	0	0	0	0	0	0	0	1	0	0
A0A1W2PNU4;A0A286YES2;F8VYC4;P0DJD0;P0DJD1	0	0	0	0	1	0	0	0	0	0	0
A0A1W2PNV4	0.394901	0	0	0	0	0	0.605099	0	0	0	0
A0A1W2PNW1;A0A494C0T4;H0YJH6;P42226;P42226-3	1	0	0	0	0	0	0	0	0	0	0
A0A1W2PNX8;Q9H3U1;Q9H3U1-2	0	0	0	0	0	0	1	0	0	0	0
A0A1W2PNY5;A0A1W2PPP6;A0A1W2PQA7;A0A1W2PQZ6;A0A1W2PR08;A0A1W2PRF0;A0A1W2PRF5;A0A1W2PRJ0;A0A1W2PS93;A0A1X7SBS0;G5E9D4;Q96EB1;Q96EB1-2;Q96EB1-3	0.53151	0	0	0	0	0	0	0	0.46849	0	0
A0A1W2PP04;Q5JY83;Q9Y388	0	0.655778	0	0	0	0	0	0	0	0	0.344222
A0A1W2PP11;Q9H300	0	0	0	0	0	0	0	1	0	0	0
A0A1W2PPB5;Q13873;Q13873-2	0	0	0.424839	0	0	0	0	0	0	0	0.575161
A0A1W2PPB7;E9PH70;H0Y8E4;Q9ULH0;Q9ULH0-2;Q9ULH0-4	0	0	0	0	0.545691	0	0	0	0	0	0.454309
A0A1W2PPC6;Q9H3H5;Q9H3H5-2	0	0	0	0	1	0	0	0	0	0	0
A0A1W2PPD8	0	0.371899	0.388919	0	0	0	0	0	0.239182	0	0
A0A1W2PPH1;P23368	0	0	0	0	0	0	0	1	0	0	0
A0A1W2PPH6	0	0.760184	0	0	0	0	0	0.239816	0	0	0
A0A1W2PPI5;Q5JSJ4	0	0	0	0	0	0	0	0	1	0	0
A0A1W2PPJ5;J3QT51;J3QT87;Q96SW2;Q96SW2-2	1	0	0	0	0	0	0	0	0	0	0
A0A1W2PPS1;Q00839;Q00839-2	0	1	0	0	0	0	0	0	0	0	0
A0A1W2PPT3;P52740;P52740-2	0	0.69833	0	0	0	0	0	0	0.30167	0	0
A0A1W2PPV0;A0A1W2PQG5;Q9Y5P2;Q9Y5P2-2	0	0	0.228655	0	0	0	0	0	0.44316	0	0.328185
A0A1W2PPZ5;P23193	0	0	0	0	0	0	1	0	0	0	0
A0A1W2PQ75;O15488;O15488-2;O15488-3;O15488-4;O15488-6	0	0.624723	0	0	0	0	0	0.375277	0	0	0
A0A1W2PQD2;Q9UBB4	0	0	0	0	0	0	1	0	0	0	0
A0A1W2PQE7	0	0	0.387496	0	0	0	0	0.612504	0	0	0
A0A1W2PQM2	1	0	0	0	0	0	0	0	0	0	0
A0A1W2PQM3	0	0	0	0	1	0	0	0	0	0	0
A0A1W2PQM5;A0A1W2PR19;A0A1W2PRG0	0	0	0	0	0	0	0	0	1	0	0
A0A1W2PQN4	0	0	0	0.389531	0	0	0	0.301545	0.308924	0	0
A0A1W2PQP6;Q9BWL3;Q9BWL3-2;Q9BWL3-3;Q9BWL3-4;Q9BWL3-5;X6R6F3;X6R6S3	0	0	0	0	0.37907	0	0	0	0	0.246049	0.374881
A0A1W2PQQ5	0	0	0	0	0	0	0	0.485824	0	0	0.514176
A0A1W2PQS6	0	0	0	0	0	0	0	1	0	0	0
A0A1W2PR09;A0A1W2PRL5;A0A1W2PRM0;F5GYH1;Q8NC96
A0A1W2PR17;F2Z2I2;Q16875;Q16875-2;Q16875-3;Q16875-4;Q5VX20;Q5W015	0	0	0	0	0	0	1	0	0	0	0
A0A1W2PR28;A0A1W2PRJ5;A0A6Q8PFR7;Q5JU85;Q5JU85-3	0.768359	0.231641	0	0	0	0	0	0	0	0	0
A0A1W2PR41;Q9Y6Q6;Q9Y6Q6-2;Q9Y6Q6-3;Q9Y6Q6-4;Q9Y6Q6-5
A0A1W2PR46;A0A1X7SBR3;P14136;P14136-2;P14136-3	0	1	0	0	0	0	0	0	0	0	0
A0A1W2PRB8	0	0.623388	0	0	0	0	0	0.376612	0	0	0
A0A1W2PRI9;E9PNW5	0	0	0	0	1	0	0	0	0	0	0
A0A1W2PRV5;E7EQZ4;Q16637;Q16637-2;Q16637-3;Q16637-4	0	0.638723	0	0	0	0	0	0	0	0	0.361277
A0A1W2PRW4;P53816	0	0	0	0	0	0	1	0	0	0	0
A0A1W2PS02	0	0	1	0	0	0	0	0	0	0	0
A0A1W2PS05;Q8NEB9	1	0	0	0	0	0	0	0	0	0	0
A0A1W2PS43;Q14108	0	0	0	0	0	0	0	0	0	1	0
A0A1W2PS52	0	0	0	0	0	0	0	0.384443	0.376654	0	0.238902
A0A1X7SBT1;Q9H1D0;Q9H1D0-2	0	0.625181	0.374819	0	0	0	0	0	0	0	0
A0A1X7SBT7;O95502	0	0	0	0	0	0	0	0	0.440743	0	0.559257
A0A1X7SBY3;H0Y860;Q9P246;Q9P246-2	0	0	0	0	0.590177	0	0	0	0.409823	0	0
A0A1X7SBZ2;A0A5H1ZRQ2;Q92841	0	0.603829	0	0	0	0	0	0	0	0.396171	0
A0A1Y0BRN3;A0A590UJ40
A0A286YEV4;A0A286YEV9;A0A286YEW8;A0A286YEX1;A0A286YF00;A0A286YF45;A0A286YF51;A0A286YF73;A0A286YFC6;A0A286YFE7;A0A286YFF5;A0A286YFH9;A0A286YFM2;B7Z2B2;E7ERQ4;Q8NHS3	0	0	0.579863	0	0	0	0	0	0.420137	0	0
A0A286YEX4;P08651;P08651-5;P08651-6	0	0.789173	0	0	0	0	0	0	0	0	0.210827
A0A286YF17;A0A286YFD0;P42898;P42898-2;Q5SNW7	0	0	0	0	0	0	1	0	0	0	0
A0A286YF22;O43175	0	0	0	0	0	0	1	0	0	0	0
A0A286YF37;Q9UK22	0.359252	0	0	0	0	0	0.640748	0	0	0	0
A0A286YF93	0	0	0	0	0	0	0	1	0	0	0
A0A286YFA5;Q8NGQ1	0	0	0.453341	0	0	0	0	0	0	0	0.546659
A0A286YFE3;A0A286YFF7;A0A286YFL8;A0A2C9F2P4;P50897;Q5T0S4	0	0	0	0	0	0	0	0	0	1	0
A0A286YFF8;Q7Z3U7;Q7Z3U7-2;Q7Z3U7-5;Q7Z3U7-6	0.316915	0	0	0	0	0	0.683085	0	0	0	0
A0A2Q2TTZ9;P01593;P01594	0	0.736522	0	0	0	0.263478	0	0	0	0	0
A0A2Q3DQE3;Q13555;Q13555-10;Q13555-11;Q13555-2;Q13555-3;Q13555-4;Q13555-5;Q13555-6;Q13555-7;Q13555-8;Q13555-9;Q5SWX3;Q8WU40	0	0	0	0	0	0	0	0	1	0	0
A0A2R8Y2A8
A0A2R8Y2F6;P42336	0	1	0	0	0	0	0	0	0	0	0
A0A2R8Y3M9	0	0	0.197517	0	0.48215	0	0	0	0	0.320333	0
A0A2R8Y3N3;A0A2R8Y5P7;A0A2R8Y6I1;P49590;P49590-2	0	0	0	0	0	0	0	1	0	0	0
A0A2R8Y3S0;A0A2R8Y511;A0A2R8YCL0;Q96JX3	0	0	0	0	0	0	0	1	0	0	0
A0A2R8Y440;A0A2R8Y4P4;A0A2R8Y7S2;A0A2R8YG32;A0A2R8YGG3;P51532;P51532-2;P51532-3;P51532-4;P51532-5;Q9HBD4	0	1	0	0	0	0	0	0	0	0	0
A0A2R8Y455;A0A2R8Y600;A0A2R8Y620;A0A2R8Y7U2;Q86VX2;Q86VX2-2	0	0	0	0	0	1	0	0	0	0	0
A0A2R8Y471;Q12967;Q12967-2;Q12967-3;Q12967-4;Q12967-5;Q12967-6;Q5T7U6	0	0	0	0	0	0	0	1	0	0	0
A0A2R8Y478;A6NNI4;G8JLH6;P21926	0	0	1	0	0	0	0	0	0	0	0
A0A2R8Y484;Q08722;Q08722-2;Q08722-3;Q08722-4	0	0	0	0	0	0	0	0	0	0	1
A0A2R8Y491;E7EWD9;O95718;O95718-1;O95718-2	0	1	0	0	0	0	0	0	0	0	0
A0A2R8Y4C2;A0A2R8Y596;A0A2R8Y5C9;A0A2R8Y5E4;A0A2R8Y6M6;A0A2R8Y8C4;A0A2R8YFK2;A0A2R8YFS8;P56945;P56945-2;P56945-3;P56945-4;P56945-5;P56945-6;P56945-7;P56945-8	0.365089	0	0	0	0	0	0.634911	0	0	0	0
A0A2R8Y4F5	0	0	1	0	0	0	0	0	0	0	0
A0A2R8Y4I8;A0A2R8Y7K2;A0A2U3TZR0;Q9UBP0;Q9UBP0-2;Q9UBP0-3;Q9UBP0-4
A0A2R8Y4K2;Q9Y2S2	0	0	0	0	0	0	1	0	0	0	0
A0A2R8Y4M1;A0A2R8Y615;A0A2R8YGW2;A0A5F9ZHK1;Q9NZA1;Q9NZA1-2;Q9NZA1-3	0	0.345621	0	0	0	0	0	0	0	0	0.654379
A0A2R8Y4T1	0	0	0	0.579434	0	0	0	0	0	0	0.420566
A0A2R8Y4U1;A0A2R8YDF7;O75164	0	1	0	0	0	0	0	0	0	0	0
A0A2R8Y4U4	0	0.440501	0	0	0	0	0	0	0	0	0.559499
A0A2R8Y4V0;A0A2R8Y4Z4;A0A2R8Y5D8;A0A2R8Y6Q0;A0A2R8YDG0;Q09428;Q09428-2	0	0	0	0.318378	0	0	0	0.681622	0	0	0
A0A2R8Y4W0	0	0	0	0.581596	0	0	0	0	0	0	0.418404
A0A2R8Y4W1;A0A2R8Y860;A0A2R8YD46;A0A2R8YFE3;A0A2U3TZS7;P43004;P43004-2	0	0	0	0	0.606355	0	0	0	0	0	0.393645
A0A2R8Y4W2;A0A2R8YE63;Q12929	0	1	0	0	0	0	0	0	0	0	0
A0A2R8Y4Y7;A0A2R8YFW4;Q9UQ90	0	0	0	0	0	0	0	1	0	0	0
A0A2R8Y4Z0;A0A2R8Y7W5;A0A2R8YF61;Q14004;Q14004-2	0	1	0	0	0	0	0	0	0	0	0
A0A2R8Y4Z6;J3KMZ7;Q9H0H0	0	0.663029	0	0	0	0	0	0	0	0	0.336971
A0A2R8Y4Z8	0	1	0	0	0	0	0	0	0	0	0
A0A2R8Y500;A0A2R8YFP1;A0A2U3TZI0;Q9BZR9;R4GN03	0	0.655265	0	0	0	0	0	0	0	0	0.344735
A0A2R8Y524;A0A2R8YEC9;E9PFW2;O00462	0	0	0.209551	0	0.469462	0	0	0	0	0.320987	0
A0A2R8Y543;A0A2R8Y5A3;A0A2R8Y804;A0A2R8YCH5;B4DGU4;P35222	0	0	0	0.380909	0	0	0	0	0	0	0.619091
A0A2R8Y544;Q9BR61	0	0	0	0	0	0	1	0	0	0	0
A0A2R8Y549;Q8NI35;Q8NI35-2;Q8NI35-3;Q8NI35-4	0	0	1	0	0	0	0	0	0	0	0
A0A2R8Y566;Q9P260-2	0.321285	0	0	0	0	0	0.678715	0	0	0	0
A0A2R8Y595;A0A2R8YFL0;P49711	0	1	0	0	0	0	0	0	0	0	0
A0A2R8Y5A0;A0A2R8YD58;E7EU96;P68400	0	1	0	0	0	0	0	0	0	0	0
A0A2R8Y5D3;A0A2R8YEZ4;O15160;O15160-2	0	1	0	0	0	0	0	0	0	0	0
A0A2R8Y5F1;A0A2R8Y7C8;A0A2R8Y7X5;A0A2R8YDR3;A0A2R8YDZ2;A0A2R8YGD6;A0A2R8YGU4;H3BMQ0;P49815;P49815-2;P49815-3;P49815-4;P49815-5;P49815-6;P49815-7;X5D2U8	0	1	0	0	0	0	0	0	0	0	0
A0A2R8Y5J4;Q9BYG8	0	0	0.430518	0	0	0.224477	0	0	0.345005	0	0
A0A2R8Y5K2;Q96LT7
A0A2R8Y5N2;A0A2R8Y5S3;A0A2R8YFV7;Q92574;Q92574-2	0	0.542483	0	0	0	0.457517	0	0	0	0	0
A0A2R8Y5P9;Q8TF72	0	0	0	0	0	0.304747	0	0	0	0.411554	0.283699
A0A2R8Y5Q1;A0A2R8Y7P3;A0A590UJ80;F5GWL1;F5H0I3;F5H876;G3V0H1;I3L0A5;P35711;P35711-2;P35711-4;P35711-5	0	0	0	0.252683	0	0	0	0.747317	0	0	0
A0A2R8Y5Q8;A0A2R8YHI9;Q15813;Q15813-2	0	0	0	0	0	0	1	0	0	0	0
A0A2R8Y5Y7;D6RAN4;P32969	0	0	0	0	0.52182	0	0	0.47818	0	0	0
A0A2R8Y605	0	0	0	0	0	0	0	1	0	0	0
A0A2R8Y635;A0A2R8YDN7;Q9H7F0;Q9H7F0-2
A0A2R8Y640	0	0.498985	0	0	0	0	0	0	0	0	0.501015
A0A2R8Y648	0	0	0	0	0	0	1	0	0	0	0
A0A2R8Y651;Q8TF64	0.513787	0	0	0	0	0	0	0	0.486213	0	0
A0A2R8Y653;Q9BZX2	0	1	0	0	0	0	0	0	0	0	0
A0A2R8Y661;A0A2R8YGD3;Q9Y4G8	0	0	0	0	0	0	1	0	0	0	0
A0A2R8Y6D0	0	0	0.237458	0	0	0	0	0	0	0	0.762542
A0A2R8Y6I6;A0A2R8Y6L5;A0A2R8YDF3;Q13627;Q13627-2;Q13627-3;Q13627-4;Q13627-5
A0A2R8Y6K8;Q7Z5P9;Q7Z5P9-2	0	0.367368	0	0	0	0	0	0	0.285996	0.346636	0
A0A2R8Y6P2;A0A2R8YDC4;A6NFE3;C9J654;J3KR48;J3KR52	0	0	0	0	0	0.492687	0	0	0.507313	0	0
A0A2R8Y6W8;P19447	0	0.662265	0	0	0	0	0	0	0	0	0.337735
A0A2R8Y6Y7;A0A2R8YDQ9;Q9P2R7;Q9P2R7-2	0	0	0	0	0	0	0	1	0	0	0
A0A2R8Y783	0	0.435241	0	0	0	0	0	0	0	0.265375	0.299384
A0A2R8Y7B4	0	0.347178	0.652822	0	0	0	0	0	0	0	0
A0A2R8Y7D5	0	0.32264	0	0	0	0	0	0.343367	0	0	0.333993
A0A2R8Y7E6;A0A5F9ZHX3;A0A5F9ZI57	0	0	0	0	0.54957	0	0	0	0	0	0.45043
A0A2R8Y7I9;A0A2R8Y855;A0A2U3TZQ7;B4DGM3;J3QKS7;Q969G3;Q969G3-2;Q969G3-4;Q969G3-5	0	1	0	0	0	0	0	0	0	0	0
A0A2R8Y7P6;A0A5F9ZHW5;F8VQP2;Q99700;Q99700-4;V9GY86	0	0	0	1	0	0	0	0	0	0	0
A0A2R8Y7Q1;E7ETD6;E9PE19;F5GXF5;Q12830;Q12830-2;Q12830-4	0	1	0	0	0	0	0	0	0	0	0
A0A2R8Y7R4;B2RUZ4;H3BS66	0	0.408598	0	0	0	0	0	0	0	0.591402	0
A0A2R8Y7T6;A0A3B3IRZ4;Q6DN90;Q6DN90-3
A0A2R8Y7U0;H0Y770;O75140;O75140-1;O75140-4;O75140-9	0	0	0	0	1	0	0	0	0	0	0
A0A2R8Y7V5;H0Y850;P38398;P38398-4;P38398-7;P38398-8;Q5YLB2	0	0.412274	0.33357	0	0	0	0	0	0.254156	0	0
A0A2R8Y7X9;P69891;P69892	0	0	0.703991	0	0	0	0	0	0.296009	0	0
A0A2R8Y7Y4;Q8N8A2;Q8N8A2-2;Q8N8A2-4	0.353274	0	0	0	0	0	0.646726	0	0	0	0
A0A2R8Y811;P62263	0	0	0	0.26038	0.3896	0	0	0.35002	0	0	0
A0A2R8Y840;Q9HCK8;Q9HCK8-2	0	1	0	0	0	0	0	0	0	0	0
A0A2R8Y849;A0A2R8Y8A0;A0A2R8YD14;E7ETK0;P62847;P62847-2;P62847-3;P62847-4	0	0	0	0.403651	0.596349	0	0	0	0	0	0
A0A2R8Y851;P62273;P62273-2	0	0	0	0	0	0	0	1	0	0	0
A0A2R8Y852;A0A2R8YDI1;P39880;P39880-2;P39880-3;P39880-4;P39880-5;P39880-6	0	0	0	0	0	0	0.748355	0	0.251645	0	0
A0A2R8Y880;Q7Z6E9;Q7Z6E9-2	0	0.767382	0	0	0	0	0	0	0	0	0.232618
A0A2R8Y8E0;A0A2U3TZI2;H7C560;P15056	0	0	0	0	0	0	1	0	0	0	0
A0A2R8YCJ8;Q5T2H3;Q9NVV5;Q9NVV5-1;Q9NVV5-3	0	0	0	0	1	0	0	0	0	0	0
A0A2R8YCL1;Q13322;Q13322-3;Q13322-4	0	1	0	0	0	0	0	0	0	0	0
A0A2R8YCS7;Q9Y3Z3	0	0	0	0	0	0	1	0	0	0	0
A0A2R8YD30;P11171;P11171-2;P11171-3;P11171-4;Q4VB86	0	0	0	1	0	0	0	0	0	0	0
A0A2R8YD49;A0A2R8YDU7;A0A2R8YEX0;Q9H1P3;Q9H1P3-2	0	0	0	0	0.572186	0	0	0	0.427814	0	0
A0A2R8YD63;Q92547	1	0	0	0	0	0	0	0	0	0	0
A0A2R8YDB8;H7BXF5;Q9H0E3;Q9H0E3-3	0	1	0	0	0	0	0	0	0	0	0
A0A2R8YDC7;A0A2R8YE40;A0A2R8YF99;A0A2R8YFQ8;A0A2R8YGK2;F8W7S1;Q8NAN2;Q8NAN2-2	0	0	0	0	0.463552	0	0	0	0.536448	0	0
A0A2R8YDD5;P30531	0	0	0	0	0.415535	0	0	0	0	0.273157	0.311308
A0A2R8YDL0;O75443	0	0	0.205744	0	0	0	0	0	0.273854	0	0.520403
A0A2R8YDQ0;Q9H267
A0A2R8YDT1;P15104	0.537231	0	0	0	0	0	0.462769	0	0	0	0
A0A2R8YE10;Q9NRW7
A0A2R8YE69;P0CG41;Q8IX94	0.614238	0	0	0	0	0	0	0	0.385762	0	0
A0A2R8YE77;A0A2U3TZM1;O14936;O14936-3	0	0	0	0.494482	0	0	0	0	0	0	0.505518
A0A2R8YEA1;B5MCJ9;O15016;O15016-2	0.579541	0	0	0	0	0	0	0	0.420459	0	0
A0A2R8YEH1	0	0	0.340615	0	0	0	0.659385	0	0	0	0
A0A2R8YEI5;P52757;P52757-9	0.398154	0	0	0	0	0	0.601846	0	0	0	0
A0A2R8YEL6	0	0	0	0	0	0	0	0	1	0	0
A0A2R8YEM2;D6RG18;D6RHI7;P51946	0	0.704182	0	0	0	0	0	0.295818	0	0	0
A0A2R8YEM9;O15050	0	0	0	0	0	0.276841	0.496913	0	0.226246	0	0
A0A2R8YEZ0;B7WP89;Q0P651;Q0P651-2;Q0P651-3;Q0P651-4	0	0	0.244513	0	0	0	0	0.755487	0	0	0
A0A2R8YF49	0	1	0	0	0	0	0	0	0	0	0
A0A2R8YF72;A0A3B3IRF0;A0A3B3IRT9;A0A3B3IRX5;A0A3B3ISI4;A0A3B3ISW5;A0A3B3ITJ8;A0A3B3ITL3;A0A3B3ITS6;A0A3B3IUE2;H7BYU4;Q9UL68;Q9UL68-4	0	0	0	0	0	0	0	1	0	0	0
A0A2R8YFF1;Q8N302	0.433617	0	0	0	0	0	0	0	0.566383	0	0
A0A2R8YFG2;Q96T66	0	0	0	0	0	0	0	1	0	0	0
A0A2R8YFH5;Q15437	0.631577	0	0	0	0	0.368423	0	0	0	0	0
A0A2R8YFL3	0	0.598129	0	0	0	0.401871	0	0	0	0	0
A0A2R8YFN3;A1Z1Q3;A1Z1Q3-1	0	0	0	0	0	0	1	0	0	0	0
A0A2R8YFW3;O60907;O60907-2	0	1	0	0	0	0	0	0	0	0	0
A0A2R8YFX0;Q969X2;Q969X2-2	0	0	0	0	0	0.234009	0	0	0.765991	0	0
A0A2R8YG42;B1ALK7;Q14155-1;Q14155-5	0.652294	0	0	0	0	0.347706	0	0	0	0	0
A0A2R8YGH5;H7C1E4;P61966	0	0	0	0	0	0.430869	0	0	0.569131	0	0
A0A2R8YGW0;P51795;P51795-1	0	0	0	0	0	0	0	0	0.57633	0	0.42367
A0A2R8YHG5;Q9BZV2	0	0	0	0	0	0	0	0	0	1	0
A0A2U3TZH3;Q05639	0	0	0	0	0	0.299191	0	0	0.329409	0.3714	0
A0A2U3TZK7	0	0.272278	0	0.414478	0	0	0	0	0	0	0.313244
A0A2U3TZL5;E9PNW4;P13987;P13987-2	0	0	0	0	0	0	0	0	0	0.524486	0.475514
A0A2U3TZN6	0	0	0	0	0.400586	0	0	0	0	0	0.599414
A0A2U3TZT9	0	0	0.699898	0	0	0	0	0	0	0	0.300102
A0A2U3TZU2;P06744	0	0	0	0	0	0	1	0	0	0	0
A0A2U3TZV8;Q4KWH8;Q4KWH8-2;Q4KWH8-3;Q4KWH8-4	0	0	0	0	0.688023	0	0	0	0.311977	0	0
A0A2Y9D025;P56556;R4GN43	0	0	0	0	0	0	0	1	0	0	0
A0A384DVU0;Q8IY17;Q8IY17-2;Q8IY17-3	0	0	1	0	0	0	0	0	0	0	0
A0A3B3IQ51;P36980;P36980-2;V9GYE7	0	0	0	0	1	0	0	0	0	0	0
A0A3B3IRE4;Q8TCE6;Q8TCE6-2	0	0	0	0	0	0.362798	0	0	0.637202	0	0
A0A3B3IRH7;H7C083;Q8TDX9;Q8TDX9-2	0	0	0.247656	0	0	0.300956	0	0	0.451388	0	0
A0A3B3IRI9;A0A3B3IRJ3;A0A3B3IRV1;A0A3B3IRZ0;A0A3B3IS37;A0A3B3IS68;A0A3B3ISJ4;A0A3B3IT04;A0A3B3IT30;A0A3B3ITZ3;A0A3B3IU52;A6NFW1;A6NGJ7;Q9BY41;Q9BY41-4	0	0.410126	0	0	0	0.589874	0	0	0	0	0
A0A3B3IRJ9;Q9Y2H2
A0A3B3IRK5;Q9H2D1	0	0	0	0	0	0	0	1	0	0	0
A0A3B3IRL2;O75629	0	0	0	0	0	0	0	0	0	1	0
A0A3B3IRL5;C9J381;P20839;P20839-2;P20839-3;P20839-4;P20839-5;P20839-6;P20839-7	0	0	0	0	0	0.310488	0	0	0.689512	0	0
A0A3B3IRM7	0	0	0	0.511661	0	0	0	0	0.488339	0	0
A0A3B3IRN8;A0A3B3ITX0;P24311	0	0	0	0	0	0	0	1	0	0	0
A0A3B3IRQ7	0	0	0	0	0	0	0	0.702175	0	0	0.297825
A0A3B3IRQ9;P55265-2;P55265-3	0	1	0	0	0	0	0	0	0	0	0
A0A3B3IRR1;A0A3F2YNY7;P08397;P08397-2	0	0	0	0	0	0	1	0	0	0	0
A0A3B3IRS4;A0A3B3IRX3;A0A3B3IS46;H0YHC1;Q71F56	0	0	1	0	0	0	0	0	0	0	0
A0A3B3IRT8;C9IZQ1;C9J3L8;C9J5W0;E9PAL7;P43307	0	0	0	0	0	0	0	1	0	0	0
A0A3B3IRU6;A0A3B3ISL2;Q9GZU2;Q9GZU2-2;Q9GZU2-4	0	0	0.234855	0	0	0	0	0	0.406477	0	0.358668
A0A3B3IRY8	0	0.166956	0	0	0.29527	0	0	0.537774	0	0	0
A0A3B3IRZ5;Q8IYE1	0	0	0	0	0	0	0	1	0	0	0
A0A3B3IS06;E7ETY2;Q13428-3;Q13428-7;Q13428-8	0	1	0	0	0	0	0	0	0	0	0
A0A3B3IS13	0.648503	0	0	0	0	0	0	0	0.351497	0	0
A0A3B3IS24;C9JIR6;O75688;O75688-2;O75688-4	0	0	0	0	0	0	1	0	0	0	0
A0A3B3IS40;A0A3B3ISE6;A0A3B3IT25;A0A3B3ITA8;A0A3B3ITA9;A0A3B3ITE7;A0A3B3ITJ7;B3KV94;Q9UGL1;Q9UGL1-2	0	0.408158	0	0	0	0.299448	0	0.292394	0	0	0
A0A3B3IS62;A0A3B3ITD6;A0A3B3ITI5;Q9Y672;S4R350	0	0	0	0	0.472255	0	0	0.527745	0	0	0
A0A3B3IS71;P06400	0	1	0	0	0	0	0	0	0	0	0
A0A3B3IS75;K7EIP0;K7EJD9;K7ESF2;P13686	0	0	0	0	0.448757	0	0	0	0	0.274269	0.276974
A0A3B3ISF0;Q659C4;Q659C4-2	0	0	0	0	1	0	0	0	0	0	0
A0A3B3ISF6;Q96G42	0	0	1	0	0	0	0	0	0	0	0
A0A3B3ISF9;P42892;P42892-2;P42892-3;P42892-4	0	0	0	0	0	0	0	0	0	1	0
A0A3B3ISG5;P14735	0	0	0	0	0	0	1	0	0	0	0
A0A3B3ISG8	0	0	0	0	0	0	0	1	0	0	0
A0A3B3ISH6;Q86U38;Q86U38-2	0	0.708233	0	0	0	0	0	0	0	0	0.291767
A0A3B3ISJ2;Q96KQ4	0	0.528499	0	0.471501	0	0	0	0	0	0	0
A0A3B3ISK7;Q6PI48	0	0	0	0	0	0	0	1	0	0	0
A0A3B3ISP1;A0A3B3ITU5;Q92625;Q92625-2	0.395632	0	0.334116	0	0	0.270251	0	0	0	0	0
A0A3B3ISQ4;Q9H6S3	0	0	0	0	0	0	1	0	0	0	0
A0A3B3ISR2;B4DPQ0;P00736	0	0	1	0	0	0	0	0	0	0	0
A0A3B3ISR7;E9PIF2;Q13206	0	1	0	0	0	0	0	0	0	0	0
A0A3B3ISS6	0	0.295156	0	0.309848	0	0	0	0	0	0	0.394996
A0A3B3IST1;B5MD23;O75954	0	0	0	0	0	0	0	0	0	0	1
A0A3B3ISU0;Q02487	0	0	0	0	0	0	0	0	0	0.370828	0.629172
A0A3B3ISV3;P02462	0	0	0	0.272526	0	0	0	0.33987	0	0	0.387604
A0A3B3ISV4	0	0	0	0	0.72052	0	0	0	0	0	0.27948
A0A3B3ISV5;Q8N9N7
A0A3B3ISV8;A0A6Q8PF19;A0A6Q8PFS9;A0A6Q8PHH0;Q8IZF0	0	0	0	0	1	0	0	0	0	0	0
A0A3B3ISV9;O43414	0	0	0	0	0	0	1	0	0	0	0
A0A3B3IT21	0	0.459444	0	0	0	0	0	0.540556	0	0	0
A0A3B3IT28;A0A3B3ITE5;A0A3B3ITF7;A0A3B3ITW6;A0A3B3IU40;A0A3B3IUA1;A0A3F2YNW9;Q12756;Q12756-2;Q12756-3	0	0	1	0	0	0	0	0	0	0	0
A0A3B3IT31;Q9NUN5;Q9NUN5-3	0	0	0	0	0	0.518893	0	0	0.481107	0	0
A0A3B3IT82;H0YNU5;P54132	0	0.306767	0	0	0	0	0	0.693233	0	0	0
A0A3B3IT92;P33991	0	1	0	0	0	0	0	0	0	0	0
A0A3B3ITH3;Q9P2X3	0	0	0	0	0	0	1	0	0	0	0
A0A3B3ITJ4	0	1	0	0	0	0	0	0	0	0	0
A0A3B3ITK0;P35442	0	0	0	0	0	0	1	0	0	0	0
A0A3B3ITN0;Q86TP1	0	0	0	0	0	0	1	0	0	0	0
A0A3B3ITN6;D6RBB0;O60683;O60683-2	0	0	0	0.227892	0	0	0	0.772108	0	0	0
A0A3B3ITP4;Q495G5;Q8IVH4	0	0	0	0	0	0	0	1	0	0	0
A0A3B3ITT1	0	0	1	0	0	0	0	0	0	0	0
A0A3B3ITT5;P47914	0	0	0	0	0	0	0	1	0	0	0
A0A3B3ITU8;A0A3B3IU04;A0A3F2YNW8;Q14643;Q14643-2;Q14643-3;Q14643-4;Q14643-5;Q14643-6;Q14643-7;Q14643-8	0	0	0	0.314978	0.685022	0	0	0	0	0	0
A0A3B3ITW1;P49841;P49841-2	0	0	0	0	0	0	1	0	0	0	0
A0A3B3ITZ6	0	0	0	0	0	0.585428	0	0	0.414572	0	0
A0A3B3IU24;Q92743	0	0	0	0	0	0	0	0.665874	0	0	0.334126
A0A3B3IU42;G5EA29;H0YDP6;H0YEL0;O14893;O14893-2;O14893-3
A0A3B3IU65;A9UHW6;A9UHW6-2;A9UHW6-3;J3KSU6;J3QLD1;J3QLJ5;J3QRZ6	0.77423	0	0	0	0	0.22577	0	0	0	0	0
A0A3B3IU69;F8W717;O00423;O00423-3	0	0	0	0	0	0.448715	0	0	0.551285	0	0
A0A3B3IUA2;B1AHD1;P55769	0	1	0	0	0	0	0	0	0	0	0
A0A3B3IUB1;Q13144	1	0	0	0	0	0	0	0	0	0	0
A0A3B3IUB5;Q8TCT9;Q8TCT9-5	0	0	0	0	1	0	0	0	0	0	0
A0A3B3IUC4;A0A6Q8PFA9;P06280	0	0.552331	0	0	0	0	0	0	0	0.447669	0
A0A3B3IUD2;Q9BUK6;Q9BUK6-2;Q9BUK6-3;Q9BUK6-7	0.366497	0	0	0	0	0	0.633503	0	0	0	0
A0A3B3IUD4;P21453	0	0.261858	0	0	0	0	0	0	0	0	0.738142
A0A3B3IUD7;Q14690	0	1	0	0	0	0	0	0	0	0	0
A0A3Q5ACI7	0	0	0	0	0	0	0	0	1	0	0
A0A494BXY3;E9PLD3;E9PRG8	0	0.339127	0	0	0	0	0	0	0	0	0.660873
A0A494BZU6;A0A494BZW7;A0A494C002;A0A494C0P9;A0A494C0Q2;A0A494C0Q6;A0A494C0W0;A0A494C156;A0A494C1K5;A0A494C1N1;O95453;O95453-2	0	1	0	0	0	0	0	0	0	0	0
A0A494BZV4;A0A494C069;Q08AG5	0	0	0	0	0	0	0	1	0	0	0
A0A494BZZ6;P78549;P78549-2;P78549-3	0	1	0	0	0	0	0	0	0	0	0
A0A494C004;A0A494C0C5;A0A494C0D2;A0A494C0V5;A0A494C141;A0A494C1C6;A0A499FJ53;A6XNE1;F6Y2X3;Q16635;Q16635-2;Q16635-3;Q16635-4;Q16635-5;Q16635-6;Q16635-7;Q16635-8;Q16635-9	0	0	0	0	0	0	0	1	0	0	0
A0A494C028;H0Y993;P35659	0	1	0	0	0	0	0	0	0	0	0
A0A494C039	0	0	0.207907	0	0.392007	0	0	0	0	0	0.400086
A0A494C066;B7Z4W5;Q16773	0	0	0	0	0	0	1	0	0	0	0
A0A494C068;A0A494C1K7;E9PGP6;Q9UGJ0;Q9UGJ0-2;Q9UGJ0-3	0.632122	0	0	0	0	0.367878	0	0	0	0	0
A0A494C0C1	0	0.401416	0	0	0	0	0	0	0.598584	0	0
A0A494C0J7;Q08188	0	0	0	0	0	0	0	1	0	0	0
A0A494C0K7;A0A494C0P0;Q6P2C8;Q6P2C8-2	0	1	0	0	0	0	0	0	0	0	0
A0A494C0M1;P52701	0	1	0	0	0	0	0	0	0	0	0
A0A494C0M2;O95925-3;Q9BQY6;Q9BQY6-2	0.465264	0	0.534736	0	0	0	0	0	0	0	0
A0A494C0N4;H9KV93;Q7Z4L5	0	0	0.546138	0	0	0	0	0	0.453862	0	0
A0A494C0P1;P04150;P04150-10;P04150-2;P04150-3;P04150-6;P04150-8;P04150-9	0	0	0	0	0	0	1	0	0	0	0
A0A494C0R8	0.658325	0	0	0	0	0.341675	0	0	0	0	0
A0A494C0X7;D3DSM0;P05107	0	0	0	0	0.435932	0	0	0	0	0.2812	0.282868
A0A494C0Z5;Q9H082	0	0	1	0	0	0	0	0	0	0	0
A0A494C100;Q9UJA2;Q9UJA2-2	0	0	0	0.258986	0	0	0	0.741014	0	0	0
A0A494C105;Q9H3U5;Q9H3U5-3;Q9H3U5-5;Q9H3U5-6	0	0	0	0	0	0.512436	0	0	0.487564	0	0
A0A494C108;Q8N9T8	0	1	0	0	0	0	0	0	0	0	0
A0A494C115;A0A494C1U4;K7N7A8;P29972;P29972-2;P29972-3;P29972-4	0	0	0	0	0.534354	0	0	0	0	0	0.465646
A0A494C120;C9J8H5;Q9HA38;Q9HA38-2	0	0	0	0	0	0	0	0	0.443428	0	0.556572
A0A494C143;Q14689;Q14689-6
A0A494C146;P50336	0	0	0	0	0	0	0	1	0	0	0
A0A494C164;P52630;P52630-4	0	0	0	0	0	0	1	0	0	0	0
A0A494C165;K7ES25;P12955	0	0	0	0	0	0	1	0	0	0	0
A0A494C167;Q9UHD2	0.385621	0	0	0	0	0	0.614379	0	0	0	0
A0A494C172	0	0	0	0	0	0	0	0	1	0	0
A0A494C193;Q08E93	0	0	0	0	0	0	0	0	0	0	1
A0A494C1F2;P35658;P35658-2;P35658-3;P35658-4;P35658-5	0	0.502992	0	0	0	0	0	0.497008	0	0	0
A0A494C1J1;Q69YQ0;Q69YQ0-2	0	0.294281	0	0	0	0	0	0.324429	0	0	0.38129
A0A494C1J8	0	0	0	0	0	0	0	0.56134	0	0	0.43866
A0A494C1L5;P50851-2	0.381859	0	0	0	0	0	0.618141	0	0	0	0
A0A494C1M4;Q3SY69	0.481595	0	0	0	0	0	0.518405	0	0	0	0
A0A494C1N0;P26885	0	0	0	0	1	0	0	0	0	0	0
A0A494C1S7;Q9Y5Q9	0	1	0	0	0	0	0	0	0	0	0
A0A494C1T9;Q6ZRV2	0	0.487916	0	0.512084	0	0	0	0	0	0	0
A0A494C1V1;Q6ZNJ1;Q6ZNJ1-2;Q6ZNJ1-3	0	0	0	0	0	0.422491	0	0	0.577509	0	0
A0A499FI31;Q15020;Q15020-4	0.648512	0.351488	0	0	0	0	0	0	0	0	0
A0A499FI48;P13667	0	0	0	0	1	0	0	0	0	0	0
A0A499FIS5;A0A499FJN1;A0A499FJS1;Q9BUB5;Q9BUB5-2;Q9BUB5-3	0	0	1	0	0	0	0	0	0	0	0
A0A499FIX8;A0FGR8-2;H7BXI1	0	0	0	0	1	0	0	0	0	0	0
A0A499FIY8;C9JC07;C9JZL8;Q96S97	0	0	0	0	0	0	0	0	0	0	1
A0A499FIZ0	1	0	0	0	0	0	0	0	0	0	0
A0A499FJ41;K7ES72;Q13938;Q13938-3;Q13938-4	0	0	0	0	0	0	0.593866	0	0.406134	0	0
A0A499FJI4;O75592;O75592-2	0	0	0	0	0	0	0	0	0	0	1
A0A499FJM4;P08684	0	0	0	0	1	0	0	0	0	0	0
A0A4V7I447;Q0VD83;Q0VD83-2	0	0	0.202805	0.308997	0	0	0	0	0	0	0.488198
A0A539;A0A589	0	1	0	0	0	0	0	0	0	0	0
A0A590PXD8;Q53SF7-3	0	0	0	0	0	0	1	0	0	0	0
A0A590UIU4;A0A590UJ09;A0A590UJ61;A0A590UJC8;A0A590UJF4;A0A590UJG1;A0A590UJH1;A0A590UJS0;A0A590UJT1;A0A590UK11;A0A590UK42;A0A590UK98;Q5VZ66	0	0	0.545344	0.454656	0	0	0	0	0	0	0
A0A590UJ36;A6NDB9	0	0	0	1	0	0	0	0	0	0	0
A0A590UJ43;P48729;P48729-3;U3KPX3	0	1	0	0	0	0	0	0	0	0	0
A0A590UJ46	0	0	0	0	0	0.520195	0	0	0.479805	0	0
A0A590UJ50;A0A590UJR3;Q13616	1	0	0	0	0	0	0	0	0	0	0
A0A590UJ62;E7ETH1;Q14003	0.775659	0.224341	0	0	0	0	0	0	0	0	0
A0A590UJ68;A0A590UJR5;A0A590UJS9;A0A590UKA8;Q12959;Q12959-3;Q12959-5;Q12959-6;Q12959-7	0	0	0	0.512529	0	0	0	0	0	0	0.487471
A0A590UJ73;A0A590UJW4;E7EQB3;Q9BSV6	0.691759	0	0	0	0	0	0	0	0.308241	0	0
A0A590UJA9;C9JCW7;C9JE12;Q9BVT8	0	0	0	0	1	0	0	0	0	0	0
A0A590UJB6	0	0	0.174321	0.288616	0	0	0	0.252401	0	0	0.284661
A0A590UJC7;A0A590UK51;O60733;O60733-2
A0A590UJF0;P63092-3	0	0	0.255312	0	0	0	0	0	0	0.355069	0.389619
A0A590UJG2;Q9UPN3-2;Q9UPN3-3
A0A590UJK3;Q14BN4;Q14BN4-2;Q14BN4-3	0	0	0	0	0	0	0	0	0	0	1
A0A590UJK4;A0A590UJP7;A0A590UK01;A0A590UK80;Q13247;Q13247-3	0	0.660596	0	0	0	0	0	0.339404	0	0	0
A0A590UJL0;P08842	0	0	0	0	0	0	1	0	0	0	0
A0A590UJN0;E7ETK1;E9PBA8;Q52LR7;Q9H2F5;Q9H2F5-2	0	1	0	0	0	0	0	0	0	0	0
A0A590UJS8;A0A5F9ZA98;B4DGL8;O75027;O75027-2	0	0	0	0	0	0	0	1	0	0	0
A0A590UJW0;A0A590UKC9;P20585	0	1	0	0	0	0	0	0	0	0	0
A0A590UJW8;Q96J02;Q96J02-2
A0A590UJY5	0	0	0	0	0	0.243429	0.531831	0	0.22474	0	0
A0A590UK09;A0A590UK73;B1AKN5;B1AKN7;B1AKN8;Q12857;Q12857-2;Q12857-4	0	1	0	0	0	0	0	0	0	0	0
A0A590UK87	0.499805	0	0.500195	0	0	0	0	0	0	0	0
A0A590UKC3;Q9UF12	0	0	0	0	0	0	0	1	0	0	0
A0A5E8;Q99501;Q99501-2;Q99501-3;Q99501-4	0	0.445099	0.554901	0	0	0	0	0	0	0	0
A0A5F9UK94;H0Y360;Q01433;Q01433-2	0.321272	0	0	0	0	0	0.678728	0	0	0	0
A0A5F9UP49;Q9BRK5	0	0	0	0	0	0.355631	0	0	0.644369	0	0
A0A5F9UY30;A0A5H1ZRP2;O43493;O43493-3;O43493-5;O43493-7	0	0	0	0	0	0.45163	0	0	0.54837	0	0
A0A5F9YFS9;C9JBL1;Q9Y6A9	0	0	0	0	1	0	0	0	0	0	0
A0A5F9YLF9	0	0.674716	0	0	0	0	0	0	0.325284	0	0
A0A5F9ZGN6	0	0	0	0	0.461368	0	0	0	0	0	0.538632
A0A5F9ZGW5;C9J8U3;Q7Z2E3-13;Q7Z2E3-5;Q7Z2E3-7;Q7Z2E3-9	0	0.576168	0	0	0	0	0	0	0	0	0.423832
A0A5F9ZGX0	0	0	0	0	0	0.312871	0	0	0.687129	0	0
A0A5F9ZGX3;A0A5F9ZGY3;A0A5F9ZGY4;A0A5F9ZGZ5;A0A5F9ZH19;A0A5F9ZH30;A0A5F9ZHD2;A0A5F9ZHE4;A0A5F9ZHN5;A0A5F9ZHR8;A0A5F9ZHS1;A0A5F9ZI30;A0A5F9ZI40;A0A5F9ZI65;D6RHE1;I6L894;Q01484	0	0	0	0	0	0	0	1	0	0	0
A0A5F9ZGY7	0	0	0	0	0	0	1	0	0	0	0
A0A5F9ZH13;E9PR06;Q9NQC8;Q9NQC8-2	0	0	0.216473	0	0	0.284993	0	0	0.498534	0	0
A0A5F9ZH20;A0A5F9ZH60;A0A5F9ZH84;Q5TF39
A0A5F9ZH93;A0A5F9ZHX9;Q9UHN1	0	0	0	0.29312	0	0	0	0.70688	0	0	0
A0A5F9ZHE0;C9JQD1;P35557	0	0	0	0	0	0	1	0	0	0	0
A0A5F9ZHH6;P19793;P19793-2	0	1	0	0	0	0	0	0	0	0	0
A0A5F9ZHJ0	0	0	0	0	0	0	0	1	0	0	0
A0A5F9ZHM4;P07195	0	0	0	0	0	0	1	0	0	0	0
A0A5F9ZHN2;E7EWD6;Q76L83;Q76L83-2	0	1	0	0	0	0	0	0	0	0	0
A0A5F9ZHN7;Q9NTJ5	0	0	0	0	1	0	0	0	0	0	0
A0A5F9ZHN9;P51648;P51648-2	0	0	0	0	1	0	0	0	0	0	0
A0A5F9ZHP1;Q8N9N2-2	0	0	0	1	0	0	0	0	0	0	0
A0A5F9ZHX8;A0A5F9ZHZ5;F5GYY5;F5H324;P51690	0	0	0	0	1	0	0	0	0	0	0
A0A5F9ZI21;Q92974;Q92974-2;Q92974-3;V9GYF0;V9GYM8	0	0.339974	0	0	0	0	0	0	0.660026	0	0
A0A5F9ZI33	0	0	0	0	1	0	0	0	0	0	0
A0A5F9ZI63;O75530;O75530-2;O75530-3	0	1	0	0	0	0	0	0	0	0	0
A0A5F9ZI76;Q32ZL2;Q32ZL2-2	0	0	0	0	0	0.256333	0	0	0.393697	0.34997	0
A0A5H1ZRP4;Q8WX92;Q8WX92-2	0	1	0	0	0	0	0	0	0	0	0
A0A5H1ZRR2;G9CGD6;G9CGD6-2;G9CGD6-3;Q6P9H4	0	0	0	0	0	0	0	0	0	0	1
A0A5H1ZRS1	0	0	0	0.522202	0	0	0	0	0	0.477798	0
A0A5K1VW60;Q99766	0	0	0	0	0	0	0	1	0	0	0
A0A5K1VW61;A0A5K1VW71;A0A5K1VW79;A0A5K1VW93;H0Y9D9;Q7Z5Q1;Q7Z5Q1-3;Q7Z5Q1-4;Q7Z5Q1-5;Q7Z5Q1-6;Q7Z5Q1-7;Q7Z5Q1-8;Q7Z5Q1-9;Q8NE35;Q8NE35-2	0	0.487657	0	0	0	0	0	0	0.512343	0	0
A0A5K1VW66;P35240;P35240-2;P35240-3;P35240-4;P35240-5;P35240-6;P35240-8	0	0	0	0	0.514591	0	0	0	0	0	0.485409
A0A5K1VW95;P40925;P40925-3	0	0	0	0	0	0	1	0	0	0	0
A0A669KA36;A0A669KB88;B7ZLR4;E7ET55;F5H748;P35670;P35670-2;P35670-4	0	0	0	0	1	0	0	0	0	0	0
A0A669KAV7;A0A669KBH9;M0QXA7;O95785-3	0	0.664665	0	0	0	0	0	0	0	0	0.335335
A0A669KAW1;G3XAD2;Q9BYC5;Q9BYC5-2;Q9BYC5-3	0	0	0	0	0	0	0	0	1	0	0
A0A669KAX3;O76024	0	0	1	0	0	0	0	0	0	0	0
A0A669KAX4;K4DI93;Q13620;Q13620-1;Q13620-3	0	0	0	0	0	0	1	0	0	0	0
A0A669KAX9;Q5T653	0	0	0	0	0	0	0	1	0	0	0
A0A669KAY5;A0A669KB27;A0A669KBH7;C9JTE9;Q9UHQ4;Q9UHQ4-2	0	0	0	0	1	0	0	0	0	0	0
A0A669KB10;A0A669KBG8;Q92538;Q92538-2;Q92538-3	0	0	0	0	0	0.491734	0	0	0.508266	0	0
A0A669KB12;Q09472	0	1	0	0	0	0	0	0	0	0	0
A0A669KB29;K7EQ21;K7EQZ1;Q9P0U4;Q9P0U4-2
A0A669KB41;A0A669KBH5;D6RA31;E7EPV7;P37840;P37840-2;Q16143	0	0.171723	0	0	0	0.274568	0.553709	0	0	0	0
A0A669KB53;A0A669KB56;A0A669KB68;A0A669KBA4;A0A669KBI6;J3KPM9;P42224;P42224-2	0	0	0	0	0	0	1	0	0	0	0
A0A669KB69;Q6Q788
A0A669KB71;O94842;O94842-2;O94842-3	0	1	0	0	0	0	0	0	0	0	0
A0A669KB81	0	0	0.618176	0	0	0.381824	0	0	0	0	0
A0A669KBE6;A0A669KBF5;Q9NV96;Q9NV96-2;Q9NV96-3	0	0	0	0	0.55866	0	0	0	0	0	0.44134
A0A669KBF4;O00327;O00327-1;O00327-6;O00327-7;O00327-8;O00327-9	0	1	0	0	0	0	0	0	0	0	0
A0A669KBG1	0	0	0.619358	0	0	0	0	0	0.380642	0	0
A0A669KBH1	0	0	0	1	0	0	0	0	0	0	0
A0A669KBH4;Q14999;Q14999-2	0.760479	0	0	0	0	0.239521	0	0	0	0	0
A0A669KBJ1;Q9P202;Q9P202-3;Q9P202-4	0	0	0	0	0	0	0	0	1	0	0
A0A669KBJ4;E7ERL6;Q6P0Q8;Q6P0Q8-2	0	0.501135	0.498865	0	0	0	0	0	0	0	0
A0A669KBJ7;Q9H2P0	0	0.743497	0	0	0	0	0	0.256503	0	0	0
A0A669KBL1;Q93009;Q93009-3
A0A6E1WB48;Q14541;Q14541-2	0	0	0	0.596772	0	0.403228	0	0	0	0	0
A0A6I8PIT3;A0A6I8PIV1;Q9P2J5	1	0	0	0	0	0	0	0	0	0	0
A0A6I8PRM6;B1ALU3;O95490-2;O95490-5	0	0	0	0.349086	0	0	0	0	0	0	0.650914
A0A6I8PS32;Q99615	0	0	0	0	0	0	1	0	0	0	0
A0A6I8PTZ8;Q9UL18	0	0	0	0.282143	0.472465	0	0	0.245392	0	0	0
A0A6I8PU65;Q9NUD9	0	0	0.557222	0	0	0	0	0	0	0	0.442778
A0A6Q8JGF9;I3L1H5;I3L3X9;Q9BZG8;Q9BZG8-2;Q9BZG8-3	0	0	0	0	0	0	1	0	0	0	0
A0A6Q8JH89;A0A6Q8LYX2;Q86WD7;Q86WD7-2;Q86WD7-4;Q86WD7-5;Q86WD7-6;Q86WD7-7	0	1	0	0	0	0	0	0	0	0	0
A0A6Q8JR05;Q6V0I7;Q6V0I7-3	0.574036	0	0.425964	0	0	0	0	0	0	0	0
A0A6Q8KRG2;Q08379	0	0	0	0	0	0.365393	0	0	0.634607	0	0
A0A6Q8PEX6;A0A6Q8PFB7;A0A6Q8PG86;A0A6Q8PHF4;O95163	1	0	0	0	0	0	0	0	0	0	0
A0A6Q8PEY3;A0A6Q8PGV6;I3L3G9;I3L522;Q9NXR1;Q9NXR1-1	0	0	0	0	0	0	0	0	1	0	0
A0A6Q8PEZ4;A0A6Q8PFG4;A0A6Q8PGL3;A0A6Q8PGS2;A0A6Q8PGU0;A0A6Q8PH79;B4DIH2;Q8TB36;Q8TB36-2	0	0	0	0	0	0	0	1	0	0	0
A0A6Q8PEZ7;A0A6Q8PG30;A0A6Q8PHQ1;Q96S66	0	0	0	0	1	0	0	0	0	0	0
A0A6Q8PF03	1	0	0	0	0	0	0	0	0	0	0
A0A6Q8PF05;B4DHE8;J3KTC1;Q96DH6;Q96DH6-2	0	0	0	0	0	0	0	0	0	1	0
A0A6Q8PF10;A0A6Q8PF85;A0A6Q8PFT0;A0A6Q8PFW0;A0A6Q8PFY8;A0A6Q8PG57;A0A6Q8PHF1;B0QYZ8;B0QYZ9;O95461;O95461-2;V9GY39;V9GY56;V9GYK8;X5DRG1	0	0	0	0.312066	0	0	0	0	0	0	0.687934
A0A6Q8PF14	0	0	0	0	0	0	0	0.545609	0.454391	0	0
A0A6Q8PF33;A0A6Q8PGE8;A0A6Q8PGN5;H3BPK7;P49588	0	0	0	0	0	0	1	0	0	0	0
A0A6Q8PF40;A0A6Q8PFC4;A0A6Q8PFY7;A0A6Q8PG00;A0A6Q8PG04;A0A6Q8PGS4;A0A6Q8PH27;A0A6Q8PH89;Q92734;Q92734-2;Q92734-3;Q92734-4	0	0	0	0	0	0	1	0	0	0	0
A0A6Q8PF44;A0A6Q8PH71;A0A6Q8PHA2;A0A6Q8PHG2;Q27J81;Q27J81-2
A0A6Q8PF62;A0A6Q8PF70;A0A6Q8PF86;A0A6Q8PFJ3;A0A6Q8PG59;A0A6Q8PGB4;A0A6Q8PGP4;A0A6Q8PGY4;A0A6Q8PGY7;A0A6Q8PHA1;A0A6Q8PHC7;A0A6Q8PHH5;A0A6Q8PHK3;A0A6Q8PHP5;Q92562
A0A6Q8PF83;A0A6Q8PGD1;A0A6Q8PH95;D6REX9;Q8N960;Q8N960-2	0	1	0	0	0	0	0	0	0	0	0
A0A6Q8PF94;O15344	0	0	0	0	1	0	0	0	0	0	0
A0A6Q8PFA4;A0A6Q8PFD4;A0A6Q8PFI6;A0A6Q8PFL5;A0A6Q8PFT9;A0A6Q8PFW1;A0A6Q8PG02;A0A6Q8PG22;A0A6Q8PGB2;A0A6Q8PGF7;A0A6Q8PGH6;A0A6Q8PGT8;A0A6Q8PGW1;A0A6Q8PGY0;A0A6Q8PH15;A0A6Q8PH70;A0A6Q8PH85;Q6UWE0;Q6UWE0-2	0	0	0	0	0	0	1	0	0	0	0
A0A6Q8PFA6;A0A6Q8PG37;A0A6Q8PGH7;A0A6Q8PH57;O00139;O00139-1;O00139-2;O00139-4;O00139-5	0	1	0	0	0	0	0	0	0	0	0
A0A6Q8PFE6;Q9UKA9;Q9UKA9-2;Q9UKA9-3;Q9UKA9-4	0	0.661698	0	0	0	0	0	0.338302	0	0	0
A0A6Q8PFG0;A0A6Q8PGT4;A0A6Q8PH04;A0A6Q8PHN3;A0A6Q8PHP9;Q9P212;Q9P212-2
A0A6Q8PFI8;P11166	0	0	0	0	0	0.332193	0	0	0.332139	0.335667	0
A0A6Q8PFJ0;P02545	0	1	0	0	0	0	0	0	0	0	0
A0A6Q8PFJ4;A0A6Q8PGV8;O95140	0	0	0	0	0	0	0	1	0	0	0
A0A6Q8PFK4;P50747	0	0	0	0	0	0	1	0	0	0	0
A0A6Q8PFM5;O95831;O95831-3	0	0	0	0	0	0	0	1	0	0	0
A0A6Q8PFU3;P43034	0.353325	0	0	0	0	0	0.646675	0	0	0	0
A0A6Q8PFY3;Q9BXW9;Q9BXW9-1;Q9BXW9-3	0	0	0	0	0	0	0	0	0.597449	0.402551	0
A0A6Q8PG17	0.563991	0	0.436009	0	0	0	0	0	0	0	0
A0A6Q8PG52;A0A6Q8PH84;P51149	0	0	1	0	0	0	0	0	0	0	0
A0A6Q8PG54;G3XAG5;P51793;P51793-2	0	0	0	0	0.612123	0	0	0	0.387877	0	0
A0A6Q8PG85;Q9HD42	0	0	0	0	0	0	1	0	0	0	0
A0A6Q8PGA8;A0A6Q8PGI6;A0A6Q8PGZ8;A0A6Q8PHH9;P41250	0	0	0	0	0	0	1	0	0	0	0
A0A6Q8PGB0;P24928	0	1	0	0	0	0	0	0	0	0	0
A0A6Q8PGM6;Q9UJY1	0	1	0	0	0	0	0	0	0	0	0
A0A6Q8PGS5;A0A6Q8PHS7;C9JEX3;Q13614;Q13614-2
A0A6Q8PGU6;Q8NB90	0	0	0	0	0	1	0	0	0	0	0
A0A6Q8PH13;A0A6Q8PH87;Q86WG5;Q86WG5-3	0	0	0.644794	0	0	0	0	0	0	0	0.355206
A0A6Q8PH21;Q9UHW9;Q9UHW9-2;Q9UHW9-3;Q9UHW9-4;Q9UHW9-5;Q9UHW9-6	0	0	0.311796	0	0	0.300765	0	0	0.387439	0	0
A0A6Q8PH82	0	0	0	0	0	0	0	0	0.619657	0	0.380343
A0A6Q8PHA5;E7ETE2;P12081;P12081-4	0	0	0	0	0	0	1	0	0	0	0
A0A6Q8PHC6;P50440	0	0	0	0	0	0	0	1	0	0	0
A0A6Q8PHH2;O95251;O95251-2;O95251-4	0	1	0	0	0	0	0	0	0	0	0
A0A6Q8PHK0;Q14669-2	0	1	0	0	0	0	0	0	0	0	0
A0A6Q8PHP0;P49902;P49902-2	0.393017	0	0	0	0	0	0.606983	0	0	0	0
A0AV96-2	0	0	0	1	0	0	0	0	0	0	0
A0AVL1;F8WC54;Q13443;Q13443-2	0	0.697684	0.302316	0	0	0	0	0	0	0	0
A0AVT1	0	0	0	0	0	0	1	0	0	0	0
A0JLT2;A0JLT2-2;J3KR33	0	1	0	0	0	0	0	0	0	0	0
A0MZ66	0	0	0	0	0	0	1	0	0	0	0
A0PJW6	0	0	0	0	0	0	0	1	0	0	0
A0PJX8	0	0	0.230185	0	0.461858	0	0	0	0.307957	0	0
A0PJZ3;C9JND4	0	0	0.252577	0	0	0.437836	0	0	0	0	0.309587
A0RZB6	0.44103	0	0.302415	0	0	0.256555	0	0	0	0	0
A1A4S6;H0Y8W5	0	0.561044	0	0	0	0	0	0.438956	0	0	0
A1A519;A1A519-2;A1A519-3;D6RIE9	0	0	0	0	0	0	0	0	0.603142	0	0.396858
A1A5C7;A1A5C7-2;A1A5C7-3;C9J4Z0	0	0	0	0	0	0	0	0	0	0.56709	0.43291
A1IGU5	0	0	0	1	0	0	0	0	0	0	0
A1L0T0	0	0	0	0	1	0	0	0	0	0	0
A1L188	0	0	0	0	0	0	0	1	0	0	0
A1L390;A1L390-3	0	0	0	0	0	0	1	0	0	0	0
A1X283	0	0	0	0	0	0	1	0	0	0	0
A2A274;Q99798	0	0	0	0	0	0	0	1	0	0	0
A2A2L4;Q5JX74;Q9NUS5	0	0	0	0	0	0	0	0	1	0	0
A2A2N0;O60676	0	1	0	0	0	0	0	0	0	0	0
A2A2Q9;Q9Y312	0	0	0	0	0	0	1	0	0	0	0
A2A2V1;P04156	0	0	0.40568	0	0	0	0	0	0	0	0.59432
A2A2V2;P42696;P42696-2;Q5TCT4	0	1	0	0	0	0	0	0	0	0	0
A2A369;Q8NF50;Q8NF50-2;Q8NF50-3;Q8NF50-4	0	0	0	0	0.611122	0	0	0	0	0	0.388878
A2A3G7	0	0	0	0	0	0.328999	0	0	0.671001	0	0
A2IDC6;Q13084	0	0	0	0	0	0	0	1	0	0	0
A2RRP1	0	0	0.281254	0	0.718746	0	0	0	0	0	0
A2RTX5;B7ZLP8
A2RU37	0	0	0	0	0	0.356403	0	0	0.643597	0	0
A2RU49	0	0.204862	0	0	0	0	0.795138	0	0	0	0
A2RUC4	0.319473	0	0	0	0	0	0.680527	0	0	0	0
A2RUS2;A2RUS2-2;A2RUS2-4;E5RHH2;E5RI43;E5RIR7;E5RJ42;E9PF32;H0YAY3	0	0	0	0	0	0	0	1	0	0	0
A2VCT4	0	0	0	0	0	0	0	1	0	0	0
A2VDF0	0	0	0	0	0	0	1	0	0	0	0
A2VDJ0;A2VDJ0-3;A2VDJ0-5	0	0	0.239586	0	0	0	0.760414	0	0	0	0
A3KFL2;Q13868;Q13868-2;Q13868-3	0.569794	0.430206	0	0	0	0	0	0	0	0	0
A3KMH1;A3KMH1-3	0	0	0	0	0	0	0	1	0	0	0
A3KN83;A3KN83-2;A3KN83-3	0.718063	0.281937	0	0	0	0	0	0	0	0	0
A4D1E9	0	0.172611	0	0	0	0	0	0.827389	0	0	0
A4D1P6
A4D1U4;C9J7X6	0	0	0	0	0	0.535081	0	0	0.464919	0	0
A4D2B0	0	0	0	0	0	0	1	0	0	0	0
A5D8V6;F5H4Q5	0.578587	0	0	0	0	0	0	0	0.421413	0	0
A5D8V7;A5D8V7-2;K7EN59;K7EPK8	0	0	0	0	0	0	0	1	0	0	0
A5PLN9;A5PLN9-2;A5PLN9-4;A5PLN9-5	0.650064	0	0	0	0	0.349936	0	0	0	0	0
A5YKK6;A5YKK6-2	0	0	0	1	0	0	0	0	0	0	0
A6NC78	0	0	0	0	0	0	0	1	0	0	0
A6NCC9;C9JHT9;C9JJV1;E9PME3;Q9Y5U2;Q9Y5U2-2	0	0	0	0	0	0	1	0	0	0	0
A6NCE7;H3BTL1;Q9GZQ8	0	0	0	0	0	0	0	0	1	0	0
A6NCS6	0	0	0	0	0	0	0	0	0	0	1
A6ND36	0	0	0	0	0	0	1	0	0	0	0
A6ND91	0	0	0	0	0	0	1	0	0	0	0
A6NDG6	0	0	0	0	0	0	1	0	0	0	0
A6NDL8	0	0	0	0	0	0	0	1	0	0	0
A6NDR6	0	0	0.618591	0	0	0	0	0	0	0	0.381409
A6NDU8	0.702731	0	0	0	0	0	0	0	0.297269	0	0
A6NE01;F5GYN0;F5H8C1	0	0	0	0	0	0	0	0	0.496454	0	0.503546
A6NED2;G3V2I3	0.727927	0	0.272073	0	0	0	0	0	0	0	0
A6NEE1
A6NEL0;A6NL93;P05114	0	1	0	0	0	0	0	0	0	0	0
A6NEL2	0	0.476458	0	0	0	0	0	0	0	0	0.523542
A6NEM2;P51610;P51610-2;P51610-4	0	1	0	0	0	0	0	0	0	0	0
A6NEY8	0	0	0	0	0	0	1	0	0	0	0
A6NF36	0	0	0	0	0	0	0	1	0	0	0
A6NFQ9;F8W8I8	0	0	0	0.512288	0	0	0	0	0.487712	0	0
A6NFS0;Q9NSD4;Q9NSD4-2	0	0.649466	0	0	0	0	0	0	0	0	0.350534
A6NFV8;D6RCT8	0	0	0	0	0	0	0	0.523674	0.476326	0	0
A6NFX8;Q9UKK9	0	0	0	0	0	0	1	0	0	0	0
A6NFY7	0	0	0	0	0	0	0	1	0	0	0
A6NG10;K7EIJ0;K7EMC9;K7ENL2;Q969T9	0	0	0	0	0	0	1	0	0	0	0
A6NG31	0	0	0	0	0	0	0	0.413185	0	0.586815	0
A6NGA6;Q5H9D4;Q9Y5S8;Q9Y5S8-2;Q9Y5S8-3	0	0	0	0	0	0	0	0	1	0	0
A6NGJ0;P51808	0	0	0	0	0	0	0	0	1	0	0
A6NGL4;P0CW00	0	0	0	0	0	0.605604	0	0	0.394396	0	0
A6NGN6;B1AJZ5;Q9NR34	0	0	0	0	0	0	0	0.608708	0.391292	0	0
A6NGQ3;Q5VST9;Q5VST9-2;Q5VST9-6	0	0	0	0.54952	0.45048	0	0	0	0	0	0
A6NGU5;B5MCK8;P19440	0	0	0	0	0	0	0	0	0	0.462575	0.537425
A6NGW1;O95070	0	0	0	0	0	0.407373	0	0	0.592627	0	0
A6NH11	0	0	0	0	0	0.367843	0	0	0.632157	0	0
A6NHG8;Q13114	0	0	0	0	0	0	0	0	0	0	1
A6NHJ8;A6NND8;C9JAL0;C9K0F7;H7C3I5;O95825;O95825-2
A6NHR9;A6NHR9-2	0	0.623411	0.376589	0	0	0	0	0	0	0	0
A6NI28;E9PJK4	0	0.244164	0	0	0	0	0	0	0	0.347386	0.408449
A6NI72;A8MVU1;C9J155;P14598;P14598-2	0	0	0	0	0	0	0	0	1	0	0
A6NIH7	0	0	0	0	0	0	1	0	0	0	0
A6NIT2;A6NMN0;P46020;P46020-2;P46020-3	0.447819	0	0	0	0	0	0.552181	0	0	0	0
A6NIV6	0	0	0	0	0	0	0	0	0.668952	0	0.331048
A6NIZ0;Q9GZM8;Q9GZM8-2;Q9GZM8-3
A6NJA2;P54578;P54578-2;P54578-3	1	0	0	0	0	0	0	0	0	0	0
A6NK44;H7C348	0	0	0	0	0	0	0	1	0	0	0
A6NKD9	0	1	0	0	0	0	0	0	0	0	0
A6NKN8	0	0	0	0	0	0	1	0	0	0	0
A6NKZ2;P51606	1	0	0	0	0	0	0	0	0	0	0
A6NLH6;Q9P003	0	0	0	0	1	0	0	0	0	0	0
A6NLN1;P26599;P26599-2;P26599-3	0	0.741473	0	0	0	0	0	0	0	0	0.258527
A6NLP5	0	0	0	0	0	0	1	0	0	0	0
A6NMH6;Q92599;Q92599-2;Q92599-4	0	0	0	1	0	0	0	0	0	0	0
A6NMH8;E9PIF1;E9PJK1;E9PRJ8;H0YDJ9;H0YDL9;P60033	0	0	0	0.365503	0	0	0	0	0	0	0.634497
A6NML8;C9J6U3;O60879-2	0	0	0	0	0	0	1	0	0	0	0
A6NMQ3;O43768;O43768-2;O43768-3;O43768-4;O43768-9;Q5T5H1	0	0	0	0	0	0	1	0	0	0	0
A6NMV7	1	0	0	0	0	0	0	0	0	0	0
A6NMZ5	0	0.534156	0	0	0	0	0	0	0	0	0.465844
A6NMZ7;A6NMZ7-2	0	0.692266	0	0	0	0	0	0	0	0	0.307734
A6NN50;O75147;O75147-1;O75147-2;O75147-4	0	0	0	0	0	0.425401	0	0	0.574599	0	0
A6NNK5;Q12888;Q12888-2;Q12888-3	0	1	0	0	0	0	0	0	0	0	0
A6NP16;E7ERM3;Q4VCS5;Q4VCS5-2	0	0.25058	0	0	0	0	0	0	0	0.34664	0.402781
A6NP52;O60831	0	0	0	0	1	0	0	0	0	0	0
A6PVD3;P48436;P56693;P56693-2;P57073	0	0	0	0	0	0	0	0	1	0	0
A6PVK5	0.422384	0	0	0	0	0.287164	0	0	0.290452	0	0
A6PVP4;B7ZBQ1;B7ZBQ3;Q9H944;Q9H944-2	0	0	0.562332	0	0	0.437668	0	0	0	0	0
A6PVU8;Q6UWW7;Q9NNX1;Q9NNX1-2;Q9NNX1-3	0	0	0	0	0	0	0	0	1	0	0
A6PVY1;A6PVY2;A6PVY3;A6PVY3-2	0	0	0.54207	0	0	0	0	0	0.45793	0	0
A6PW57;Q99755;Q99755-3;Q99755-4	0	0	0.270237	0.399934	0	0	0	0	0	0	0.329828
A6PWM2;Q6UXH1;Q6UXH1-2;Q6UXH1-3;Q6UXH1-4;Q6UXH1-5;Q6UXH1-6	0	0	0	0	0.703671	0	0	0	0	0.296329	0
A6QRJ0;P49184	0	0	0.384545	0	0	0	0	0	0	0.615455	0
A6XND0;A6XND1;B3KWK7;C9JMX4;H0Y5K2;P17936;P17936-2	0	0	0	0	0.632129	0	0	0	0	0.367871	0
A7E2V4;A7E2V4-3;A7E2V4-4;A7E2V4-5;S4R393;S4R410	0.635361	0	0	0	0	0.364639	0	0	0	0	0
A7KAX9;A7KAX9-2
A7MCY6	0	0	0	0	0	0	0	0.616554	0.383446	0	0
A7XZE4;Q3SX28	0	0.31414	0	0	0	0.68586	0	0	0	0	0
A8CG34;A8CG34-2	0	1	0	0	0	0	0	0	0	0	0
A8DPD7;Q9C0D3	0	0	0	0	0	1	0	0	0	0	0
A8K7Q2	0	0	0	0	0	0.248599	0	0	0.751401	0	0
A8MPP7;A8MPY5;E7ETV6;Q9UPE1;Q9UPE1-2;Q9UPE1-3;Q9UPE1-4	0	0	1	0	0	0	0	0	0	0	0
A8MQ02	0	0.239733	0	0.225689	0	0	0	0	0	0.245851	0.288727
A8MQB8;G3V0J0;Q06787-2	0	0	0	0	0.464943	0	0	0	0.289291	0	0.245766
A8MSI8;D6RAR2;D6RFL2;J3KTA2	0	0.318481	0	0	0	0	0	0.681519	0	0	0
A8MSY1;C9JYJ2;Q8IVN3	0	0	0.545185	0	0	0	0	0	0.454815	0	0
A8MT69;A8MT69-2;A8MT69-3;J3QR01;J3QRS1	0	0.448996	0	0	0	0	0	0.206753	0	0	0.344251
A8MTT3	0	0	0	0	0	0	0	0.744333	0	0	0.255667
A8MU21;Q9BVK8;Q9BVK8-2	0	0	0	0	0	0	0	0.66461	0	0	0.33539
A8MUM1;Q53HC9
A8MV81	0	0	1	0	0	0	0	0	0	0	0
A8MVV6;E9PN41;E9PPX8;E9PSH3;J3KQ42;O14817	0	0	0	0	0.501786	0	0	0	0	0	0.498214
A8MVZ6;Q96G01;Q96G01-3;Q96G01-4	0	0	1	0	0	0	0	0	0	0	0
A8MWD9;F5H013;P62308;Q49AN9	0	1	0	0	0	0	0	0	0	0	0
A8MXB7	0.392777	0	0	0	0	0	0.607223	0	0	0	0
A8MXP9	0	1	0	0	0	0	0	0	0	0	0
A8MXV4	0	0	0	0	0	0	0	1	0	0	0
A8MYA3;J3KQ25;Q8N6M9	0.391142	0	0.35851	0	0	0	0	0	0.250348	0	0
A8MYU2;E5RHP1	0	0	0	0	0	0	0	0	1	0	0
A8MYZ0	0	0.618025	0.381975	0	0	0	0	0	0	0	0
A8TX70;A8TX70-2;E9PAL5	0	0	0	0	0.61034	0	0	0	0	0	0.38966
A9X3U0;Q96GF1	0	0	1	0	0	0	0	0	0	0	0
A9Z1X7;E9PCT1;Q8IYB3;Q8IYB3-2	0	1	0	0	0	0	0	0	0	0	0
B0QY89;Q9Y262	0.623728	0	0	0	0	0.376272	0	0	0	0	0
B0QY95;Q9NQG6	0	0	0	0.409027	0	0	0	0.326851	0	0	0.264122
B0QYF8;P02144	0.636183	0	0	0	0	0	0	0	0.363817	0	0
B0QYK0;Q01844;Q01844-3;Q01844-5;Q01844-6	0	1	0	0	0	0	0	0	0	0	0
B0QYN7;H3BQQ9;P63279	0	0	0	0	0	0	1	0	0	0	0
B0QYP2;O95931	0	0.659477	0	0	0	0	0	0	0	0	0.340523
B0QYW5;F6RTR7;O43808	0	0	0	0	0	0	0	0.7396	0	0	0.2604
B0QZ18;F2Z2V0;Q99829	0	0	0	0	0	0	1	0	0	0	0
B0QZA9;Q6QHF9;Q6QHF9-4	0	0	0	0	0	0	0	0	1	0	0
B0YIW2;P02656	0	0	0	0	0	0	0	0	0	1	0
B1AH77;B1AH80;P15153	0	0	0	0.398353	0.601647	0	0	0	0	0	0
B1AH87;P30536	0	0	0	0	0	0	0	1	0	0	0
B1AHA8;P09601	0	0	0	0	0.668116	0	0	0	0	0.331884	0
B1AHB1	0	0	1	0	0	0	0	0	0	0	0
B1AHL2;P23142;P23142-2;P23142-3;P23142-4	0	0	0	0	0	0	1	0	0	0	0
B1AHR2	0	0	0.22275	0	0	0	0.77725	0	0	0	0
B1AJQ6;Q86Y82	0	0	0	0	0	0	0	0	0	1	0
B1AJS1;O14525;O14525-2;O14525-3	0	0.615166	0	0	0	0	0	0.384834	0	0	0
B1AK53
B1AK61;Q5VTY9;Q5VTY9-2;Q5VTY9-3;Q5VTY9-5;Q5VTY9-6;Q5VTY9-7	0	0	0.297121	0.388953	0	0.313926	0	0	0	0	0
B1AK88;P47756-2
B1AKC9;P29323;P29323-2;P29323-3	0	0	0	0	0	0	1	0	0	0	0
B1AKG0;Q03591	0	0	0	0	0.642024	0	0	0	0	0.357976	0
B1AKI6;Q9NUK0;Q9NUK0-2	0	0	0	0	0	0	1	0	0	0	0
B1AKL4;Q9NRA8;Q9NRA8-2;Q9NRA8-3	0	0	0	0	0	0	0	0	0.541786	0.458214	0
B1AKR6;Q9NP97	1	0	0	0	0	0	0	0	0	0	0
B1AL05;H0Y6Y8;Q8N983;Q8N983-2;Q8N983-3;Q8N983-4;Q8N983-6;Q8N983-7	0	0	0	0	0	0	0	1	0	0	0
B1AL69;Q7L3B6	0	0	0	0	0	0	1	0	0	0	0
B1ALA9;P60891	1	0	0	0	0	0	0	0	0	0	0
B1ALD1;Q9Y6B7	0	0	0	0	0	0.331246	0	0	0.668754	0	0
B1ALM5;Q9P0T7	0	0	0	0	0	0	0	0	0.529084	0.470916	0
B1ALY0;Q8IXS6-2	0	0	0	0	0	0	1	0	0	0	0
B1AM21	0	0.208544	0	0	0	0	0	0.541363	0	0	0.250093
B1AM27;O14795;O14795-2
B1AMI2	0	0	0	0	0	0	0	1	0	0	0
B1AMN7;Q9P2B4	0	0.524516	0	0	0	0	0	0	0	0	0.475484
B1AMS2;Q14141;Q14141-2;Q14141-4	0	0	0	1	0	0	0	0	0	0	0
B1AMT9;B1AMU0;B1AMU5;Q969W1;Q969W1-2;Q969W1-3;Q969W1-4	0	0	0	0.497791	0	0	0	0	0	0	0.502209
B1AMW1;H0YDI1;P19256;P19256-2;P19256-3	0	0	0	0	0	0	0	0	0	0.364191	0.635809
B1ANE6	0	0	1	0	0	0	0	0	0	0	0
B1ANH0;B1ANH2;Q16774;Q16774-2
B1APN9;O75335	0.711887	0.288113	0	0	0	0	0	0	0	0	0
B1APR7;Q99504;Q99504-2;Q99504-3;Q99504-4;Q99504-5	0.620038	0	0	0	0	0	0	0	0.379962	0	0
B1AQK6;B1AQK7;E9PDR3;F6RH32;Q00975;Q00975-2	0	0.684018	0	0	0	0	0	0.315982	0	0	0
B1AQP5;O75618;O75618-2;V9GY27	0	1	0	0	0	0	0	0	0	0	0
B1AVT0;P49760;P49760-3	0	0.202001	0	0	0	0	0	0.797999	0	0	0
B1AXG1;B4DG22;B7ZB17;P51812	0	0	0	0	0	0	1	0	0	0	0
B1B0D4;Q86TH1	0	0	0	0	0	0	0	0	0	0	1
B2RC85;B2RC85-2;H0YFY2;P0C881	0	0	1	0	0	0	0	0	0	0	0
B2WTI3;B2WTI4;K7EJU9;Q6NYC1;Q6NYC1-2;Q6NYC1-3	0	0	0	0	0	0	0.705885	0	0.294115	0	0
B3EWG3;B3EWG5;B3EWG6	0	0	0.314641	0	0	0	0.685359	0	0	0	0
B3KP42	0	0.761415	0.238585	0	0	0	0	0	0	0	0
B3KP96;H0Y626;J3QKY5;K7EL43;K7ENN8;O95361;O95361-2	0	0	0	0	0	0	0	0	1	0	0
B3KS81	0.700747	0	0	0	0	0	0	0	0.299253	0	0
B3KT41;Q496J9	0	0	0	0	0	0	0	0	1	0	0
B3KTM8;H0YLJ3;Q9UBU8-2	0	0.667317	0	0	0	0	0	0.332683	0	0	0
B3KUS5;Q70CQ3	0	0	0	0.383921	0	0	0	0.616079	0	0	0
B3KVY5;F5GWA4;F5GWK6;F5H268;Q9H3F6;Q9H3F6-2;Q9H3F6-3	0	0	0	0.377348	0	0	0	0	0	0	0.622652
B3KY94;O14735;O14735-3	0	0	0	0	1	0	0	0	0	0	0
B4DDD6	0	0	0	0	0	0	1	0	0	0	0
B4DDF4;B4DUT8;Q99439	0	0	0	0	0	0	1	0	0	0	0
B4DEE8;P16455	0	1	0	0	0	0	0	0	0	0	0
B4DEN4;B8ZZ56;E7EV05;E9PFU9;Q8WV99;Q8WV99-2	0	0	0	0	0	0	0	0	1	0	0
B4DFC0;E9PMV6;E9PR50;G3V1B4;H0YD20;H0YE53;H0YEL8;Q9UGK8;Q9UGK8-2	0	0	1	0	0	0	0	0	0	0	0
B4DFG5;K7EMR4;K7EMW3;Q9BZJ4;Q9BZJ4-2	0	0	0	0	0	0	0	0.613787	0	0	0.386213
B4DI03;K7EJQ7;Q9BY50	0	0	0	0	1	0	0	0	0	0	0
B4DJ07	0	0	0	0	0	0	0	0	1	0	0
B4DJC3	0	0	0	1	0	0	0	0	0	0	0
B4DJV2;O75390	0	0	0	0	0	0	0	1	0	0	0
B4DJV5;Q13610	1	0	0	0	0	0	0	0	0	0	0
B4DK77;Q9H6K4	0	0	0	0	0	0	0	1	0	0	0
B4DL54	0	0	0	0	0	0	1	0	0	0	0
B4DLJ1	0	1	0	0	0	0	0	0	0	0	0
B4DLN1	0	0	0	0	0	0	0	1	0	0	0
B4DLP0;B8ZZF7;O00338;O00338-2	0	0	0	0.341992	0	0	0.658008	0	0	0	0
B4DR61;P61619	0	0	0	0	0	0	0	1	0	0	0
B4DR80;Q9Y6E0;Q9Y6E0-2
B4DUC8;Q13126	0	0	0	0	0	0	1	0	0	0	0
B4DUJ5;Q8IWP9	0	0	0	0	0.53908	0	0	0	0	0	0.46092
B4DVL7;Q9NQ25-3;Q9NQ25-4;Q9NQ25-5	0	0	0.445734	0	0	0	0	0	0	0	0.554266
B4DVN3;E7ESC7;Q7L5Y9;Q7L5Y9-3
B4DVT3;Q96SY0	0	1	0	0	0	0	0	0	0	0	0
B4DXU5;B5MBY7;E9PID2;E9PLL4;M0R0K3;M0R2F9;P55055;P55055-2;Q13133;Q13133-2;Q13133-3	0	0.808724	0	0	0	0	0	0	0	0	0.191276
B4DXZ6;P51114	0	0	0	0	0.653927	0	0	0	0	0	0.346073
B4DYU2;H3BQV3;Q96MW5	0.488964	0	0	0	0	0	0.511036	0	0	0	0
B4DYY6;Q75T13;Q75T13-2;Q75T13-3	0	0	0	0	0	0	0	0	0	0	1
B4E0E3;G3V1M5;Q9H6X4;Q9H6X4-2;Q9H6X4-3	0	0	0	0	0	0	0	0	0	1	0
B4E0T2;P50542;P50542-4	0	0	0	1	0	0	0	0	0	0	0
B4E0Y9;Q8NBY1;Q9P289	0	0	0	0	0	0	1	0	0	0	0
B4E107;F5GXE4;O95260-2	0	0	0	0	0	0	1	0	0	0	0
B4E1G1;Q9BUN8;Q9BUN8-2	0	0	0	0	1	0	0	0	0	0	0
B4E1Q4;O14730	1	0	0	0	0	0	0	0	0	0	0
B4E1Z4	0	0	0	0	1	0	0	0	0	0	0
B4E2Q0;P98194;P98194-4	0	0	0	0	0	0.367455	0	0	0.632545	0	0
B4E3T4;Q93062;Q93062-2;Q93062-3;Q93062-4;Q93062-5	0	1	0	0	0	0	0	0	0	0	0
B5MBZ0	0	0	0	0	0	0.349796	0	0	0.650204	0	0
B5MC20;P0C870	0.607859	0	0	0	0	0	0	0	0.392141	0	0
B5MC22;Q9UDX5	0	0	0	0	0	0	0	1	0	0	0
B5MC35;B5MCA1;B5MD16;Q96G28;Q96G28-2	0	1	0	0	0	0	0	0	0	0	0
B5MC53;B5MCF8;E7EX18;G5E9F5;P39210	0	0	0	0	0	0	0	1	0	0	0
B5MCF4;C9JDC5;P05230;P05230-2	0	0	0	0	0	0	1	0	0	0	0
B5MCF9;O00541;O00541-2	0	1	0	0	0	0	0	0	0	0	0
B5MCN7;Q15788;Q15788-2;Q15788-3	0.495671	0	0	0	0	0	0	0	0.504329	0	0
B5MCQ6;B5MCU6;B5MCV5;E7ETT9;Q96DB2;Q96DB2-2	0	0	0.691532	0	0	0	0	0	0	0	0.308468
B5MCX7;C9JX82;D3YTC9;F8WB76;H7C3L3;Q6NXT1;Q6NXT1-2	0	0	0.64525	0	0	0	0	0	0.35475	0	0
B5MDF5;J3KQE5;P62826	0	0	0	0	0	0	1	0	0	0	0
B5MDL5;P53778;P53778-2	0	0	0.239497	0	0	0	0.760503	0	0	0	0
B5MDU6;Q9H6V9;Q9H6V9-2	0	0	1	0	0	0	0	0	0	0	0
B5ME97;E7EW69;E7EX04;Q9P0V9;Q9P0V9-2;Q9P0V9-3	0	0	0	0	0	0	0	1	0	0	0
B5MEF5;Q8TER0;Q8TER0-3;Q8TER0-4;Q8TER0-5	0	0	0	0	0.603718	0	0	0	0	0	0.396282
B7WNH4;E9PLH2;E9PNA8;E9PP42;M0QYU9;M0R0R3;M0R2G5;Q9BQ49	0	0	0	0	0	0.264034	0	0	0.735966	0	0
B7WNR7;Q5HYL7-4	0	0	0.41252	0.58748	0	0	0	0	0	0	0
B7WP74;Q9HCG8	0	0.716895	0	0	0	0	0	0	0	0	0.283105
B7WPE2;Q32P44	0.447173	0	0	0	0	0	0.552827	0	0	0	0
B7WPG3;C9IYN3;Q8WVV9;Q8WVV9-4;Q8WVV9-5;V9GYK2	0	1	0	0	0	0	0	0	0	0	0
B7WPL0;Q9NVN3;Q9NVN3-1;Q9NVN3-3	0.536362	0	0	0	0	0.221577	0	0	0.24206	0	0
B7WPL9;F8W9A8;Q6PFW1;Q6PFW1-2;Q6PFW1-3;Q6PFW1-4;Q6PFW1-5;Q6PFW1-6;Q6PFW1-7	0	0	0	0	0	0	0	0	1	0	0
B7Z1G8
B7Z278;Q8WZA2;Q8WZA2-2;Q8WZA2-3;Q8WZA2-4;Q8WZA2-5
B7Z2D2;H7C4Y6;Q8NHQ1;Q8NHQ1-4;Q8NHQ1-5	0	0	0	0.224005	0	0	0	0.504232	0	0	0.271764
B7Z2R2;P14927;P14927-2	0	0	0	0	0	0	0	1	0	0	0
B7Z2R7;Q5T8D3;Q5T8D3-2;Q5T8D3-3	0	0	0	0.544177	0	0	0	0.455823	0	0	0
B7Z493;E9PJX4;F8VWL3
B7Z4L1;B7Z4U3;E7EPD9;E7EPW5;E9PCV1;G3XAH9;H7BXS2;Q9NRC1-2;Q9NRC1-3;Q9NRC1-4;Q9NRC1-5;Q9NRC1-6	0	0	0	0	0.735717	0	0	0	0	0	0.264283
B7Z4S1	1	0	0	0	0	0	0	0	0	0	0
B7Z4W8;E9PD09;Q96HH9;Q96HH9-2;Q96HH9-3;Q96HH9-4;Q96HH9-5	0	0	0	0	0.667686	0	0	0	0	0	0.332314
B7Z5P7;O60711;O60711-2	0	0.18137	0	0	0	0	0	0	0	0.29038	0.52825
B7Z5R6;Q14596;Q14596-2	0	0	0.510142	0	0	0	0	0	0	0	0.489858
B7Z6D5;Q96GQ7	0	1	0	0	0	0	0	0	0	0	0
B7Z6J7;H7C148;O75175
B7Z6Q0;Q12980	0	0	0	0	0	0.383533	0	0	0.616467	0	0
B7Z7D2;E9PQY3;P11117	0	0	0	0	0.587438	0	0	0	0	0.412562	0
B7Z7P8;P62495;P62495-2
B7Z8H2;O14717;O14717-2;O14717-3;O14717-4;O14717-5;O14717-6;Q7Z3E4	0.534552	0	0	0	0	0	0	0	0.465448	0	0
B7Z8Q8;Q6NUS8	0	0	0	0	1	0	0	0	0	0	0
B7Z8V7	0	0.322156	0	0	0	0	0	0.677844	0	0	0
B7Z9C2;F5H4R6;F8VV59;F8VY35;F8W020;F8W0J6;F8W118;F8W543;H0YH88;H0YHC3;H0YIV4;P55209;P55209-2	0	0	0	0	0	0	1	0	0	0	0
B7Z9I1;P11310;P11310-2;Q5T4U5	0	0	0	0	0	0	0	1	0	0	0
B7ZAP0;F5H8L0;Q5R372-5;Q5R372-6;Q5R372-7;Q5R372-8	0	0	0	0	0	0	1	0	0	0	0
B7ZAQ6;B7ZAQ6-2;B7ZAQ6-3;P0CG08	0	0	0	0	0	0.43921	0	0	0.56079	0	0
B7ZBB8
B7ZBC8;B7ZBC9;O75449	0.648382	0	0	0	0	0	0	0	0.351618	0	0
B7ZC38;Q9NR46	0	0	0	0	0	0	1	0	0	0	0
B7ZKP5;H0Y3A8;O75129;O75129-2;O75129-3;O75129-4;O75129-6	0	0	0	0	0	0	0	0	1	0	0
B7ZKQ9;Q8WTV0-2;Q8WTV0-4	0	0	0	0	0.335878	0	0	0	0	0.272133	0.391989
B7ZL48;C9J7L3;Q460N3;Q460N3-2	0	0	0	0	0	0	0	0	1	0	0
B7ZL88;Q8N8Q8	0	0	0	0	0	0	0	1	0	0	0
B7ZLQ8;E5RJM0;Q17RY0;Q17RY0-2	0	0	0	0	1	0	0	0	0	0	0
B8ZZ19;H0Y3U0;P20472	0	0	0	0	0	0	1	0	0	0	0
B8ZZ47;H0Y714;Q96G21	0	0.681999	0.318001	0	0	0	0	0	0	0	0
B8ZZ50;B9A044;C9JEL3;O60573;O60573-2
B8ZZ98;Q8WVK2	0	1	0	0	0	0	0	0	0	0	0
B8ZZ99;F8WCZ3;Q96NT0;Q96NT0-2	0	0	0	0	0.633958	0	0	0	0	0.366042	0
B8ZZD4;Q86VP1;Q86VP1-2;Q86VP1-3;Q86VP1-4	0	0	0	0	0	0	0	1	0	0	0
B8ZZF5;C9J5M4;Q9H8M9	0	0.234392	0	0	0	0	0	0	0	0.290806	0.474802
B8ZZJ6;H7C1S9;Q8TD22	0	0	0	0	0	0	0	1	0	0	0
B8ZZK5;O43924	0.366914	0	0	0	0	0	0.633086	0	0	0	0
B8ZZQ6;P06454;P06454-2	0	0	0	0	0	0	1	0	0	0	0
B8ZZU8;Q15370;Q15370-2	0	0	0	0	0	0	1	0	0	0	0
B8ZZV9;B8ZZX2;Q9H8M1;Q9H8M1-2	0	0	0	0	0	0	0	1	0	0	0
B8ZZY8	0	0	0	0	0	0	0	0	1	0	0
B8ZZZ1;F8W8K9;G5E966;Q96PC3;Q96PC3-2;Q96PC3-3;Q96PC3-4	0	0	0	0	0	0.293385	0	0	0.706615	0	0
B9A057;Q86WW8	0	0	0	0	0	0	0	1	0	0	0
B9EGA3;J3KMX2;Q92925;Q92925-2;Q92925-3	0	1	0	0	0	0	0	0	0	0	0
B9EJG8;B9EJG8-2;D6RAQ9;D6RDW6	0	0	0.300339	0	0	0.357792	0	0	0.341869	0	0
B9TWZ6;K7EKS6;Q9Y2X0;Q9Y2X0-2;Q9Y2X0-3;Q9Y2X0-4;Q9Y2X0-5;U3KQ43;U3KQB4	0	1	0	0	0	0	0	0	0	0	0
B9ZVN9;O95602	0	0.432715	0	0	0	0	0	0	0	0	0.567285
C4AMC7;Q6VEQ5	0	0	0	0	0	1	0	0	0	0	0
C4B7M2;Q96JI7;Q96JI7-2;Q96JI7-3	0	0	0.429883	0	0	0	0	0	0.570117	0	0
C4P0D6;C4P0D8;Q99598	0	0	0	0	0	0	1	0	0	0	0
C9IYN7;C9J2D6;C9J9N8;C9JA82;C9JEX8;C9JLH5;Q0PNE2;Q0PNE2-2	0.593696	0	0	0	0	0.406304	0	0	0	0	0
C9IYT0	0	0.500023	0	0	0	0	0	0	0	0	0.499977
C9IZ93;C9J9P8;C9JF62;Q969M7;Q969M7-2;Q969M7-3;Q969M7-7	0.326018	0	0	0	0	0	0.673982	0	0	0	0
C9IZF6;P41247	0	0	0	0	0	0	0	1	0	0	0
C9IZL5;C9JC87;C9JMG3;C9JWL4;F8WCR6;H0Y6K1;O00189	0.55723	0	0.44277	0	0	0	0	0	0	0	0
C9IZN0;Q9NRM6;Q9NRM6-2	0	0	0	0	0.537679	0	0	0	0	0	0.462321
C9IZU8;C9J9T0;Q96AT9	0	0	0	0	0	0	1	0	0	0	0
C9J050;C9JEJ2;P49585	0	0	1	0	0	0	0	0	0	0	0
C9J066;E9PN67;Q8N4C6;Q8N4C6-10;Q8N4C6-11;Q8N4C6-2;Q8N4C6-4;Q8N4C6-5;Q8N4C6-6;Q8N4C6-7;Q8N4C6-9	0	0	1	0	0	0	0	0	0	0	0
C9J0A4;P57723;P57723-2	0	0	0.45068	0	0	0	0	0	0.54932	0	0
C9J0A7;Q9UQN3;Q9UQN3-2	0	0	0	0	0	0	1	0	0	0	0
C9J0I9;Q86WB0;Q86WB0-2;Q86WB0-3	0	0.46056	0	0	0	0	0	0.53944	0	0	0
C9J0J0;Q96EE4	0	0	0	0	0	0	0	0	1	0	0
C9J0J7;G5E9Q6;P35080-2	0	0	0	0	0	0	1	0	0	0	0
C9J0K6;P30626;P30626-2;P30626-3	0	0	0	0	0	0	1	0	0	0	0
C9J159;F5H6W4;Q9H992	0.474555	0	0.233382	0	0	0	0	0	0.292063	0	0
C9J165	0.611982	0	0	0	0	0.179794	0	0	0.208223	0	0
C9J1C6;Q9P0P0	0	0	0	0	0	0	1	0	0	0	0
C9J2C0;Q9NY65;Q9NY65-2	0	0	0	0	0	0	1	0	0	0	0
C9J2P9;Q75N03;Q75N03-2	0	0.564266	0	0	0	0	0	0.435734	0	0	0
C9J2Y9;P30876	0	1	0	0	0	0	0	0	0	0	0
C9J365;C9JA28;Q9UNL2;Q9UNL2-2	0	0	0	0.442592	0	0	0	0.557408	0	0	0
C9J384;Q9BQ75;Q9BQ75-2	0	1	0	0	0	0	0	0	0	0	0
C9J3D7;Q9UKG9;Q9UKG9-3	0	0	0	1	0	0	0	0	0	0	0
C9J3R8;E7ETS9;O60513	0	0	0	0	0	0	0	0.321567	0.678433	0	0
C9J406	0	0	0	0	0	0	0	1	0	0	0
C9J494;Q9H000;Q9H000-2
C9J4X5;Q96EU6;Q96EU6-2;Q9H160;Q9H160-2	0	1	0	0	0	0	0	0	0	0	0
C9J4Z3;P61513	0	0	0	0	0.506474	0	0	0.493526	0	0	0
C9J555;J3QLM1;J3QLS1;Q14849	0	0	0.51235	0	0	0	0	0	0.48765	0	0
C9J597;C9JF31;Q9BV87	0	0	0.499716	0	0	0	0	0	0.500284	0	0
C9J5D1;E7EQ69;Q9GZZ1	0	0	0	0	0	0.53725	0	0	0.46275	0	0
C9J5N1;Q9BTE6;Q9BTE6-2;Q9BTE6-3	0	0	0	0	0	0	1	0	0	0	0
C9J6G3;C9J7M1;O95749	0	0	0	0	0	0	1	0	0	0	0
C9J6K0;Q13103	0	0.417946	0	0	0	0	0	0	0.582054	0	0
C9J6K3;C9JM54;Q9HC52	0	1	0	0	0	0	0	0	0	0	0
C9J6P4;Q7Z2W4	0	0	0	0.33117	0.365476	0	0	0.303354	0	0	0
C9J6W0	0	0	0	0	0	0	0	0	1	0	0
C9J712;P35080	0	0	0	0	0	0	1	0	0	0	0
C9J758;Q969T7;Q969T7-2	0	0	0	0	0	0	1	0	0	0	0
C9J798;E5RK78;E7ERK1;F5GXT2;F8W6L0;O43374;O43374-2	0	0.387522	0	0.256146	0	0	0	0.356332	0	0	0
C9J7E5;Q9Y5L0;Q9Y5L0-1	0	0	0	0	0	0	1	0	0	0	0
C9J7E8;Q9UL63;Q9UL63-2	0	0.536935	0	0	0	0	0	0	0.463065	0	0
C9J7K9;C9J9P4;H7C5I5;O15162;O15162-2	0	0	0	0	0	0	0	0.600808	0	0	0.399192
C9J813	0	0	0	1	0	0	0	0	0	0	0
C9J826	0	0	0	0	0	0	0	0	0	1	0
C9J8B8;Q969S8;Q969S8-2	0	0	0	0	0	0	0.716509	0	0.283491	0	0
C9J8S2;Q99969	0	0	0	0	0.652258	0	0	0	0	0.347742	0
C9J8T4;C9JYN7;O43567	0	0	0	0	0.68066	0	0	0	0	0.31934	0
C9J8W4;E9PBQ4;F5GXF0;F8W6I3;H7BZ00;P22736;P22736-2;P43354;P43354-2	0	0	1	0	0	0	0	0	0	0	0
C9J975;E7ESL9;Q96P47;Q96P47-2;Q96P47-3;Q96P47-4;Q96P47-6	0.611979	0	0	0	0	0.388021	0	0	0	0	0
C9JA08;Q96D46
C9JA90	0	0	0	0	0	0.402479	0	0	0.597521	0	0
C9JAX1;Q16595	0	0	0	0	0	0	0	1	0	0	0
C9JB28;C9JPS5;Q6ZMH5	0	0	0	0	1	0	0	0	0	0	0
C9JB30;Q9UPY8	0	0	0	0	0	0	1	0	0	0	0
C9JBG5;E9PMC3;F5H8L4;Q8NBJ9;Q8NBJ9-2	0	0	0	0	0	0	0	0	0.48588	0.51412	0
C9JBI3;P78330	0	0	0	0	0	0	1	0	0	0	0
C9JBY7;Q9Y291	0	0	0	0	0	0	0	1	0	0	0
C9JC47;P0CG42;P0CG43	0	0	0.489002	0	0	0	0	0	0.510998	0	0
C9JCC6;E9PQX9;Q14919;Q14919-2	0	1	0	0	0	0	0	0	0	0	0
C9JCU6;F2Z2B3;F8WCP4;Q12851;Q12851-2	1	0	0	0	0	0	0	0	0	0	0
C9JEG3;Q9UBQ6	0	0	0	0	0	0	0	0	1	0	0
C9JEH3;C9JG97;Q13685	0	0	0	0	0	0	1	0	0	0	0
C9JEK0;C9JP86;Q08AI8	0	0	0.390623	0	0	0	0	0	0.609377	0	0
C9JER6;P61366	0	0	0	0	0	0	0	0	0.41144	0	0.58856
C9JF50;E9PLU1;E9PRK5;E9PRW1;E9PSD6;Q9H019;Q9H019-2;Q9H019-3	0	0	0	0.270424	0	0	0	0.729576	0	0	0
C9JFE4;Q13098;Q13098-5;Q13098-7	0.352532	0	0	0	0	0	0.647468	0	0	0	0
C9JFR7;P99999	0	0	0	0.27999	0	0	0	0.72001	0	0	0
C9JFV4;Q8IZL8	0	0.681799	0	0	0	0	0	0.318201	0	0	0
C9JFX4;E9PLG6;E9PSD9;Q6IA17;Q6IA17-2	0	0	0	0	0	0.437851	0	0	0.562149	0	0
C9JG87;Q9NYK5;Q9NYK5-2	0	0	0	0	0	0	0	1	0	0	0
C9JGT3;G5E9C5	0	0	0.718049	0	0	0	0	0	0	0	0.281951
C9JHD7;C9JJK9;Q86YP4;Q86YP4-2;Q86YP4-3	0	1	0	0	0	0	0	0	0	0	0
C9JI98	0	0	0	0	0.709686	0	0	0	0	0	0.290314
C9JIF9;P13798	0.384608	0	0	0	0	0	0.615392	0	0	0	0
C9JIT1	0.561153	0	0	0	0	0	0	0.438847	0	0	0
C9JIZ6;P07602;P07602-2;P07602-3	0	0	0	0	0.542095	0	0	0	0	0.457905	0
C9JJ19;P82930	0	0	0	0	0	0	0	1	0	0	0
C9JJM2;Q96MV1;S4R434	0	0	0	0	0	0	0	0	1	0	0
C9JJN9;Q8N3P4;Q8N3P4-2;Q8N3P4-3	0.423596	0	0	0	0	0.210355	0	0	0.366049	0	0
C9JJT5;G3V325;P56134-2;P56134-4	0	0.297285	0	0	0	0	0	0.702715	0	0	0
C9JJX6;E9PDC3;O00192;O00192-2	0	0	0	0	0	0	0	0	0	0	1
C9JK83;O95630;O95630-2	0.5661	0	0	0	0	0	0	0	0.4339	0	0
C9JKL2;C9JPX5;O95772;O95772-2	0	0	0	0	0.450983	0	0	0	0.267276	0.281742	0
C9JLB7;Q96HP4;U3KQU8	0	0.249606	0	0	0	0	0	0.750394	0	0	0
C9JLU1;P52434;P52434-4	0	0	0	0	0	0	1	0	0	0	0
C9JLW8;I3L2L5;I3L4Q0
C9JNE2;Q9Y530
C9JNI1	0	0	0	0	0	0	0	0.331898	0.32725	0	0.340852
C9JNW5;C9JXB8;P83731	0	0	0	0	0	0	0	1	0	0	0
C9JNZ0;C9JRY4;Q96IW7	0	0	0	0	0	0	0	0	1	0	0
C9JP16;O75718	0	0	0	0	1	0	0	0	0	0	0
C9JP85;Q16656;Q16656-2;Q16656-4	0	1	0	0	0	0	0	0	0	0	0
C9JPG5;Q13275;Q13275-2	0	0	0.422233	0	0	0	0.577767	0	0	0	0
C9JPI6	0.581519	0	0	0	0	0	0	0	0.418481	0	0
C9JPQ6;Q9BYB4;Q9BYB4-2	0	0	0.478768	0	0	0	0	0	0.521232	0	0
C9JPU9;H3BS93;H3BSZ1;P05108-2	0	0	0	0	0	0.311784	0	0	0.688216	0	0
C9JQ41;H7C525;Q4VC31	0	0	0	0	0	0	0	1	0	0	0
C9JQ60	0.481822	0	0	0	0	0	0.518178	0	0	0	0
C9JQD4;O43447	0	1	0	0	0	0	0	0	0	0	0
C9JQH3;J3KQW6;Q86UV6;Q86UV7	0	0	0	0.336647	0	0	0	0.663353	0	0	0
C9JQI7;C9JQI7-2;D6RC30	0	0	0	0	0.372325	0	0	0	0	0.336518	0.291157
C9JQS9;E7ETT1;E7ETT4;E7EX59;E9PDR0;P05166;P05166-2	0	0	0	0	0	0	0	1	0	0	0
C9JQV0;H7C0T1;H7C2R9;Q9BRJ6	0	0	0	0	0	0	0	1	0	0	0
C9JQX2;Q86VD9	0	0	1	0	0	0	0	0	0	0	0
C9JQZ3;C9JS61;C9K022;Q9H8Y5	0	0	0	0	0	0.294668	0	0	0.705332	0	0
C9JR56	0	0	0	0.203114	0	0	0	0.796886	0	0	0
C9JRD2;P25686;P25686-2	0	0	0	0	0	0	1	0	0	0	0
C9JRZ6;Q9NX63	0	0	0	0	0	0	0	1	0	0	0
C9JS50;Q687X5	0	0	0	0	0.580593	0	0	0	0	0	0.419407
C9JSU1;Q9Y608;Q9Y608-2;Q9Y608-4;Q9Y608-5	0	0	0	0	0	0	0	0	0	0.537492	0.462508
C9JUQ8	0	0	0.460959	0	0	0.539041	0	0	0	0	0
C9JW74;C9JWU9;Q5EB52;Q5EB52-2;Q5EB52-3	0	0.267627	0	0	0	0	0	0	0	0	0.732373
C9JXB2;Q9NS98	0	0	0	0	0	0	0	0	0.455265	0	0.544735
C9JXF9;P08833	0	0	0	0	0.522041	0	0	0	0.477959	0	0
C9JXM5;G5E9W1;Q7Z3E1	0	1	0	0	0	0	0	0	0	0	0
C9JY79;M0QZQ3;Q9H254;Q9H254-4	1	0	0	0	0	0	0	0	0	0	0
C9JYJ6;Q4L180-3;Q4L180-5;Q4L180-7	0	0	0	0	0	0	0	1	0	0	0
C9JYM0;O75817	0	0	0	0	0.652452	0	0	0	0	0	0.347548
C9JYS5;J3KS67;J3QL47;J3QL63;K7ENL4;Q96ET8-3;Q9NYZ1	0	0	0	0	0.620643	0	0	0	0.379357	0	0
C9JZ38	0.773824	0.226176	0	0	0	0	0	0	0	0	0
C9JZB3;Q16821	0	0	0	0	0	0	0	0	0.349796	0	0.650204
C9JZF7;G5E9W2;Q9P2E5;Q9P2E5-2	0	0	0	0	0.531842	0	0	0	0.468158	0	0
C9JZG9;C9JZY6;P62256	0	0	0	0	0	0	1	0	0	0	0
C9JZI1;P35249;P35249-2	0	0.764875	0	0	0	0	0	0	0	0	0.235125
C9JZI7	0	0	0	0	0	0	1	0	0	0	0
C9JZR2;O60716;O60716-10;O60716-11;O60716-13;O60716-2;O60716-3;O60716-5;O60716-9	0	0	0	0	0	0	0	0	0	0	1
C9K058;Q9H2H8	0	0	0	0	0	0	1	0	0	0	0
C9K0C8;Q9NS00;Q9NS00-2	0	0	0	0	0	0	0	0	1	0	0
C9K0I9	0	0	0	0	0	0	0	0	0	0	1
D1MQ08;M0R1J0;O15554	0	0	0	0	0	0	1	0	0	0	0
D3DQV9;H0Y3P2;P78344;P78344-2	0	0	0	0	0	1	0	0	0	0	0
D3DRR9;Q86WR7;Q86WR7-2	0	0	0	0	0	0	0	0	0.465513	0	0.534487
D3DUJ3;K7EIE9;K7EQG9;P17706;P17706-2;P17706-3;P17706-4	0	0.400003	0	0	0	0	0	0	0	0	0.599997
D3DWX8;P98173;P98173-2;P98173-3;Q5HY75	0	0	0	0	0	0.304059	0	0	0.695941	0	0
D3K2X1	0	0	0	0	0	0	0	0	1	0	0
D3YTA9;F6U1T9;P63098	0	0	0	0	0	0	1	0	0	0	0
D3YTC7;Q9UBM1;Q9UBM1-2;Q9UBM1-3	0	0	0	0	1	0	0	0	0	0	0
D5H3J5;Q2L6G2	0	0	0	0	0	0	0	0	0	0	1
D6R927;D6R946;D6R9K5;D6R9X3;D6RA45;D6RAT2;D6RB37;D6RBQ8;D6RCM1;D6REC2;D6REP3;D6RF98;D6RIV8;D6RIZ8;Q06330;Q06330-4;Q06330-5;Q06330-6;Q06330-7	0	1	0	0	0	0	0	0	0	0	0
D6R938;Q13557;Q13557-10;Q13557-11;Q13557-12;Q13557-3;Q13557-4;Q13557-5;Q13557-6;Q13557-8;Q13557-9	1	0	0	0	0	0	0	0	0	0	0
D6R9C7	0	0	0	0	0	0	0	1	0	0	0
D6R9P3	0	1	0	0	0	0	0	0	0	0	0
D6R9P8;Q6AWC2;Q6AWC2-4;Q6AWC2-6	0.701313	0	0	0	0	0.298687	0	0	0	0	0
D6R9R5	0	0	0	0	0	0	0	0	1	0	0
D6R9S2;D6RIC1;H0Y8L2;H0YEZ3;H0YJP6;P59282	0	0	0.544344	0	0	0	0	0	0.455656	0	0
D6R9S7;D6RDB0;D6RHE3;Q96GZ6;Q96GZ6-2;Q96GZ6-5;Q96GZ6-6;Q96GZ6-7;Q96GZ6-9	0	0	0	0	0	0.362991	0	0	0.637009	0	0
D6R9Z7;P15954	0	0	0	0	0	0	0	1	0	0	0
D6RA25	1	0	0	0	0	0	0	0	0	0	0
D6RA47;D6RE79;D6RIZ4;Q14728	0	0	0	0	0.6507	0	0	0	0	0	0.3493
D6RA57;D6RC31;D6RE67;H0Y9X1;Q96EY4	0	1	0	0	0	0	0	0	0	0	0
D6RA82;P12429	0	0	0	0	0	0	1	0	0	0	0
D6RA96;Q9NZ71;Q9NZ71-2;Q9NZ71-4;Q9NZ71-6;Q9NZ71-7;Q9NZ71-8;X6R5I7	0	0.449215	0	0	0	0	0	0	0.550785	0	0
D6RAD4;P50613	0	1	0	0	0	0	0	0	0	0	0
D6RAD5	0	0	0.596038	0	0	0	0	0.403962	0	0	0
D6RAJ6;Q9UKT5;Q9UKT5-2	0.42506	0	0	0	0	0.28034	0	0	0.2946	0	0
D6RAN1;D6RF83;D6RH06;H7BYK4;Q9NR12;Q9NR12-2;Q9NR12-3;Q9NR12-4;Q9NR12-5;Q9NR12-6	0	0.519802	0	0	0	0	0	0	0	0	0.480198
D6RAN8;H7C5U8;Q9P0M9	0	0	0	0	0	0	0	1	0	0	0
D6RAR4;Q04756	0	0	0.263329	0	0.311377	0	0	0	0	0.234502	0.190792
D6RAZ0;E9PD12;F2Z2L2;H0YAM8;Q96AX9;Q96AX9-11;Q96AX9-13;Q96AX9-14;Q96AX9-2;Q96AX9-3;Q96AX9-5;Q96AX9-6;Q96AX9-7;Q96AX9-8	0	0	0	0	0	0	0	0	0.512422	0	0.487578
D6RAZ3;E7EMP6;Q96FZ2	0	0	0	0	0	0.451589	0	0	0.548411	0	0
D6RB81;Q9UHK6;Q9UHK6-5	0	0	0	0.566744	0	0	0	0.433256	0	0	0
D6RB89;P50120	0	0	0	0	0	0	1	0	0	0	0
D6RBN6	0	0	0	0	0	0	0	0	1	0	0
D6RBR7;Q9Y3S2
D6RBW1;P06730;P06730-2;P06730-3	0	0	0	0	0	0	1	0	0	0	0
D6RC47;D6REW1;Q9Y255;Q9Y255-2	0	0.318731	0	0	0	0	0	0.681269	0	0	0
D6RCC4;D6RCC9;Q8NEC7	0	0	0	0	0	0	1	0	0	0	0
D6RCM8;O95379;O95379-2;O95379-3;O95379-4	0	0	0	0	0	0	1	0	0	0	0
D6RCP5;Q8N264;Q8N264-2;Q8N264-3	0	0	0	0	0	0	0	1	0	0	0
D6RDG3	0	0	0	0	0	0	0	0	0	0.351778	0.648222
D6RDG8;D6RGZ4;O43791	0.714107	0.285893	0	0	0	0	0	0	0	0	0
D6RDK6	0	0	0	0.285352	0	0	0	0.442521	0	0	0.272127
D6RE84	0	0	1	0	0	0	0	0	0	0	0
D6REA0;O75879	0	0	0	0	0	0	0	1	0	0	0
D6REK2;H0Y9T3;Q8WV44;Q8WV44-2;Q8WV44-4	0	0.531564	0	0	0	0	0	0	0	0	0.468436
D6RER5;D6RGI3;Q9NVA2	0	0	0	0.51052	0	0	0	0.48948	0	0	0
D6REX3	0.69145	0	0	0	0	0.30855	0	0	0	0	0
D6REY2;P23508;P23508-2
D6RF35;P02774;P02774-3	0	0	0.20609	0	0.504086	0	0	0	0	0.289824	0
D6RF43	0	0	0	0	0	0	0	0	1	0	0
D6RF44
D6RF47;D6RF94;Q9H1J5;Q9H1J5-2	0	0.507579	0	0.492421	0	0	0	0	0	0	0
D6RF48;Q9P2W9	0	0	0	0	1	0	0	0	0	0	0
D6RFG8;P27707	0	0.281086	0	0	0	0	0	0.319052	0.399862	0	0
D6RFI1	0.358644	0	0	0	0	0.22159	0	0	0.214011	0	0.205755
D6RFI3;E7EQR8;Q9GZM5	0	0	0	0	0	0.424029	0	0	0.575971	0	0
D6RGG3;Q99715;Q99715-4	0	1	0	0	0	0	0	0	0	0	0
D6RGK3;D6RHW1;D6RIE8;D6RIV9;D6RIY1;Q16594;Q9HBM6	0	1	0	0	0	0	0	0	0	0	0
D6RGK9;H0Y9C1;H0Y9Z5;Q96LI5	0	0	0	0	0	1	0	0	0	0	0
D6RGZ3;Q8N1W1;Q8N1W1-3;Q8N1W1-4;Q8N1W1-5;Q8N1W1-6	0	0	0	0	0	0	0	0	1	0	0
D6RH21	0	0	0.626363	0.373637	0	0	0	0	0	0	0
D6RHG0;P78383
D6RHH9;Q8TCT1;Q8TCT1-2;Q8TCT1-3	0	0	1	0	0	0	0	0	0	0	0
D6RHX8;F8W9W2;P43250;P43250-2;P43250-3	0	0	0	0	0.651546	0	0	0	0	0	0.348454
D6RIA8	0.500026	0	0	0	0	0	0	0	0.499974	0	0
D6RID8;Q13888;Q6P1K8	0	0.680167	0	0	0	0	0	0	0	0	0.319833
D6RIE3	0	0	0	0	0	0	0	1	0	0	0
D6RIG4;Q9HCL0;Q9HCL0-2	0	0	0	0	0	0	1	0	0	0	0
D6RIT3;Q8N1A6	0	0	0	0	0	0	1	0	0	0	0
D6RIY6;Q06265;Q06265-2	0	0.705884	0	0	0	0	0	0	0	0.294116	0
D6RJ90;Q9Y6G5	0	0	0	0	0	0.510976	0	0	0.489024	0	0
D6RJC3;E7EQN9;E9PCZ3;E9PG59;E9PHC0;O15327	0	0	0.344188	0.290016	0	0	0	0	0	0	0.365796
D6RJG9;Q9Y5W7;Q9Y5W7-2;Q9Y5W7-3;Q9Y5W7-4	0	0	0.458275	0	0	0.541725	0	0	0	0	0
D6W5U7;Q8TBR4;Q9UJ98;Q9UJ98-2;Q9UJ98-3	0	0	0.384614	0	0	0	0.615386	0	0	0	0
E0CX11
E1CKY7;O60237;O60237-4;O60237-6	0	0	0	0.299376	0	0	0	0.700624	0	0	0
E2QRG8	0.601655	0	0	0	0	0	0	0	0.398345	0	0
E2QRK7;Q5JTD0;Q5JTD0-2	0.507755	0	0	0	0	0.255084	0	0	0.237161	0	0
E3W980;E3W982;Q8TDG4	1	0	0	0	0	0	0	0	0	0	0
E5KLJ9;O60313-10;O60313-2;O60313-9	0	0	0	0.196365	0	0	0	0.803635	0	0	0
E5RFE0;E5RGT8;Q9UQ10	0	0	0	0	0	0	1	0	0	0	0
E5RFF8;J3KNU2;Q8IX29;Q8IX29-2	0	0	0	0	0	0	0	1	0	0	0
E5RFP0	0	0	0	0	0	0	0	0.434101	0.565899	0	0
E5RFT4;Q8N4L2
E5RFV7;O00300	0	0	0	0.23384	0	0	0	0.76616	0	0	0
E5RFX7	0	0	0	0.557738	0	0	0	0	0	0	0.442262
E5RG15;E5RHB3;Q8NBP0;Q8NBP0-2	0	0.509456	0	0	0	0	0	0	0	0	0.490544
E5RG17;G5EA19;H0YBX2;Q6P1N9;U3KQS5	0	0	0	0	0	0	1	0	0	0	0
E5RG29	0	0	0	0	1	0	0	0	0	0	0
E5RG44;E5RGJ1;E5RIT1;Q629K1	0	0	0	0	1	0	0	0	0	0	0
E5RGB7;E5RGH1;H0YBV9;Q7Z388	0	0	0.553784	0	0	0	0	0	0	0	0.446216
E5RGT2	0	0	0.466081	0	0	0	0	0	0	0	0.533919
E5RGU4	0	0	0	0	0	0	0	1	0	0	0
E5RGZ2;H0YKJ1;Q6NT76;Q6NT76-2;Q6NT76-3;Q6NT76-5	0	0	0	0	1	0	0	0	0	0	0
E5RHC5;Q8N6T3;Q8N6T3-3	0	0	0.450456	0	0	0	0.549544	0	0	0	0
E5RHG8;Q15369	0	0	0	0	0	0	1	0	0	0	0
E5RHW4;O94905	0	0	0.235006	0	0.764994	0	0	0	0	0	0
E5RIA2;E7EUF1;Q13822;Q13822-2;Q13822-3
E5RIA9;Q9UJ68;Q9UJ68-5	0	0	0	0	0	0	1	0	0	0	0
E5RIH5;Q6NXR4	0.522876	0	0	0	0	0.248587	0	0	0.228537	0	0
E5RIQ5;Q9BX73;Q9BX73-2	0	0.531515	0	0	0	0	0	0	0	0	0.468485
E5RIT6;Q9UNX3	0	0	0	0	0.350058	0	0	0.649942	0	0	0
E5RIW3;E5RJD8;O75347	0	0	0	0	0	0	1	0	0	0	0
E5RIW9;P28328	0	0	0.323631	0.353599	0	0	0	0	0	0	0.32277
E5RJ29;Q9NYI0;Q9NYI0-2	0	0	0	1	0	0	0	0	0	0	0
E5RJ36;H0YAX6;Q14CS0	1	0	0	0	0	0	0	0	0	0	0
E5RJF8;E5RK82;O15182	0	1	0	0	0	0	0	0	0	0	0
E5RJM6;E5RJM6-2;E5RJM6-3	0	0	0	0	0	0.281507	0	0	0.718493	0	0
E5RJN7;E7EPX0;E7EVI1;E7EVJ4;Q9NUL3;Q9NUL3-2;Q9NUL3-3;Q9NUL3-6;Q9NUL3-7;Q9NUL3-8	0	0	0	0	1	0	0	0	0	0	0
E5RK69
E7EM64;Q7L5N1	0.384848	0	0	0	0	0	0.615152	0	0	0	0
E7EM72;E7EWQ4;O75912	0	0	0	0	0	0.336578	0	0	0.663422	0	0
E7EMB1;Q9UH65	0	0	0	0	0	0	1	0	0	0	0
E7EMC7;Q13501	0	0	0	0	0	0	0	0	0	0.496744	0.503256
E7EMD6;O43572	0.448026	0	0	0	0	0.257142	0	0	0.294832	0	0
E7EMK3;J3QLD9;Q14254	0	0	0	0	0.525679	0	0	0	0	0	0.474321
E7EMS2;G3V3D1;G3V3E8;J3KMY5;P61916	0	0	0.243745	0	0.433145	0	0	0	0	0.32311	0
E7EMT5;P04798	0	0	0	0	1	0	0	0	0	0	0
E7EMT6;E7ENY2;E7EQA9;E7EV32;E7EVA2;E7EW82;H7C3L4;Q92844	0.47832	0	0	0	0	0.262899	0	0	0.258781	0	0
E7EMZ9;E9PBC6;O95359;O95359-3
E7EN24;Q12864	0	0	0	0.395157	0	0	0	0	0	0	0.604843
E7EN73;Q8IZA0;Q8IZA0-2	0	0	0	0	0.603426	0	0	0	0	0.396574	0
E7EN91;Q9BWF2	0.42289	0	0	0	0	0	0.57711	0	0	0	0
E7END6;P04070;P04070-2	0	0	0.327585	0	0.672415	0	0	0	0	0	0
E7ENL6;P12111;P12111-2;P12111-4	0	1	0	0	0	0	0	0	0	0	0
E7ENV7	0	0	0	0.472243	0	0	0	0	0	0	0.527757
E7ENY0;E7EV99;P35611;P35611-2;P35611-3;P35611-6	0	0	0	1	0	0	0	0	0	0	0
E7EP17;Q9NYC9;Q9NYC9-2
E7EP72;Q9UFG5	0	0	0	0	0	0	0	0	0	1	0
E7EPB3;P50914	0	0	0	0.344136	0.655864	0	0	0	0	0	0
E7EPG1;Q13201	0	0.226991	0	0	0	0	0	0.446087	0	0	0.326923
E7EPI0;Q9P2D0	0	0	0	0.282651	0.717349	0	0	0	0	0	0
E7EPK1;E7ES33;Q16181;Q16181-2	0	0	0	1	0	0	0	0	0	0	0
E7EPN9;Q9Y520;Q9Y520-4;Q9Y520-5;Q9Y520-6;Q9Y520-7
E7EPS8;P28827;P28827-2	0	0	0	0	0	0	0	0	0	0	1
E7EPT4;P19404	0	0	0	0	0	0	0	1	0	0	0
E7EQB2;E7ER44;P02788;P02788-2	0	0	0	0.394464	0	0	0	0	0	0.296419	0.309117
E7EQH1;E9PMB7;E9PR55;Q8NFJ9;Q8NFJ9-2;Q8NFJ9-3	0	1	0	0	0	0	0	0	0	0	0
E7EQM8;J3QRM6;J3QS93;P43146	0	0	0	0	0	0	0	0	0.573621	0	0.426379
E7EQQ5;Q9C035;Q9C035-2;Q9C035-3;Q9C035-4;Q9C035-5;Q9C035-6	0	0	0.338653	0	0	0.261964	0	0	0.399383	0	0
E7EQT3;Q9BY07-5	0	0	0	0	0	0	1	0	0	0	0
E7EQT4;Q9UKV3;S4R3H4	0	1	0	0	0	0	0	0	0	0	0
E7EQU1;E7ES08;E9PES6;O15347	0	1	0	0	0	0	0	0	0	0	0
E7EQY1;Q96C01	0	0	0	0.389211	0	0	0	0.610789	0	0	0
E7ER45;O43451
E7ER77;Q7Z2K6	0	0	0	0	1	0	0	0	0	0	0
E7ERI8;E7EW49;O75122-3	0	0	0	0	0	0	1	0	0	0	0
E7ERS3;Q86VM9	0	0.65814	0	0	0	0	0	0.34186	0	0	0
E7ES84;P50748	0	0	0	0	0	0	0	0	0.380569	0	0.619431
E7ES96;P49768;P49768-2	1	0	0	0	0	0	0	0	0	0	0
E7ESA6;H0YBP1;Q05397;Q05397-7
E7ESA7;P29474	0	0.365792	0	0	0	0	0	0	0	0	0.634208
E7ESC6;Q9UIA9	0	0	0	0	0	0	1	0	0	0	0
E7ESD2;Q641Q2;Q641Q2-2
E7ESF6;Q13094	0	0	0.262722	0	0	0	0	0.737278	0	0	0
E7ESK6;E9PBI9;P34741	0	0	0.193132	0	0	0	0	0	0	0.559594	0.247274
E7ESL0;J3KQY1;Q9NWU5;Q9NWU5-2;Q9NWU5-3	0	0	0	0	0	0	0	1	0	0	0
E7ESP4;P17301	0	0	0	0.342063	0	0	0	0	0	0	0.657937
E7ESS3;K7EKW3;Q71RG4;Q71RG4-2	0	0	0	0	1	0	0	0	0	0	0
E7ESY4;H0Y4T7;Q13330;Q13330-3	0	1	0	0	0	0	0	0	0	0	0
E7ET48;E9PIR9;Q8N1P7	0	0	0	0	0	0	0	0	1	0	0
E7ET49;Q8NCG7;Q8NCG7-2;Q8NCG7-4	0	0	0	0	0	0.39225	0	0	0.60775	0	0
E7ET87;E7EVI4;O75410;O75410-10;O75410-2;O75410-3;O75410-4;O75410-5;O75410-6;O75410-7;O75410-9
E7ETB3	1	0	0	0	0	0	0	0	0	0	0
E7ETH0;G3XAM2;P05156	0	0	0	0	1	0	0	0	0	0	0
E7ETM6;Q8N2H4	0	0	0	0	0	0	0	0	1	0	0
E7ETU5;F6Y5H0;P29558;P29558-2	0	1	0	0	0	0	0	0	0	0	0
E7ETU7;H0Y9G6;P09001	0	0	0	0	0	0	0	1	0	0	0
E7ETY4;E9PC69;Q7KZI7;Q7KZI7-10;Q7KZI7-11;Q7KZI7-12;Q7KZI7-13;Q7KZI7-14;Q7KZI7-15;Q7KZI7-16;Q7KZI7-2;Q7KZI7-3;Q7KZI7-4;Q7KZI7-5;Q7KZI7-6;Q7KZI7-7;Q7KZI7-8;Q7KZI7-9
E7ETZ4;Q9Y6E2
E7EU04;F5GXV3;F5GZ45;F5H3Z4;F5H4Z6;J3KQP4;J3KR13;P14207	0	0	0	0	0.607374	0	0	0	0	0	0.392626
E7EU05;E9PLT1;P16671;P16671-3	0	0	0	0	0.444624	0	0	0	0	0	0.555376
E7EU13;Q96P48;Q96P48-1;Q96P48-2;Q96P48-3;Q96P48-4	0	0	0	0	0	0	1	0	0	0	0
E7EU14	0	0	0	0	0	0	1	0	0	0	0
E7EU40;Q92959	0	0	0.17269	0	0.368338	0	0	0	0	0	0.458972
E7EUH7;Q96PZ0;Q96PZ0-2	0	0	0	0	0	0	1	0	0	0	0
E7EUJ7;Q8TC20;Q8TC20-2;Q8TC20-3;Q8TC20-5	0	1	0	0	0	0	0	0	0	0	0
E7EUU4;Q04637-8
E7EUW0;H0YA74;Q9C0I3;Q9C0I3-2
E7EV01;O15484	0	0	0	0.412059	0	0	0	0	0	0	0.587941
E7EV71;Q14766;Q14766-2;Q14766-4;Q14766-5	0	0.787061	0	0	0	0	0	0	0	0	0.212939
E7EVA0
E7EVC7;Q676U5;Q676U5-2	0	1	0	0	0	0	0	0	0	0	0
E7EVE9;P18074	0	0.479752	0.265981	0	0	0	0	0.254267	0	0	0
E7EVH7;F8W6L3;G3V2E7;G3V3H3;G3V5R9;Q07866;Q07866-10;Q07866-2;Q07866-3;Q07866-4;Q07866-5;Q07866-6;Q07866-7;Q07866-8;Q07866-9	0	0	0	0	0	0	1	0	0	0	0
E7EVJ5;Q96F07;Q96F07-2	0	0	0	0.627042	0	0	0	0	0	0	0.372958
E7EVM0;H0YBR7;H0YBY1;P01266;P01266-2	0	0	0	0.279669	0	0	0	0.720331	0	0	0
E7EVQ6;Q14534	0	0	0	0	1	0	0	0	0	0	0
E7EVX8;Q8WWY3	0	1	0	0	0	0	0	0	0	0	0
E7EW05;Q9NVU7;Q9NVU7-2	0	1	0	0	0	0	0	0	0	0	0
E7EW06;E9PBB1;G3XAK3;Q8N3C7;Q8N3C7-2;Q8N3C7-3	0	0.503011	0	0	0	0	0	0.496989	0	0	0
E7EWD3;O75077;O75077-2	0	0	0	0	0.623404	0	0	0	0	0	0.376596
E7EWM1;Q15596	0	0	0	0	0	0.374577	0.625423	0	0	0	0
E7EWP0;H0Y886;O43674;O43674-2	0	0	0	0	0	0	0	0.70913	0	0	0.29087
E7EWR4;P33240;P33240-2	0	1	0	0	0	0	0	0	0	0	0
E7EWW0;Q7Z3J2	0	0	0	0	0	1	0	0	0	0	0
E7EWX8	0	0	0	0	0	0.51593	0	0	0.48407	0	0
E7EX17;P23588	1	0	0	0	0	0	0	0	0	0	0
E7EX40;Q6WKZ4;Q6WKZ4-2;Q6WKZ4-3	0.398557	0	0	0	0	0	0.601443	0	0	0	0
E7EX44;Q05682-2;Q05682-3;Q05682-6	0	0.456104	0	0.543896	0	0	0	0	0	0	0
E7EX54	0.4931	0	0	0	0	0.212083	0	0	0.294817	0	0
E7EX70;Q9GZS1	0	1	0	0	0	0	0	0	0	0	0
E7EX90;Q14203;Q14203-3;Q14203-4;Q14203-6	0.709406	0	0	0	0	0.290594	0	0	0	0	0
E9PAM5	0	0.636473	0	0	0	0	0	0.363527	0	0	0
E9PAQ1;P27918	0	0	0	0	0	0	0	0	0	1	0
E9PAV3;E9PAV3-2;F8VZJ2;F8W0W4;H0YHX9;Q13765
E9PB18;Q6UXG2;Q6UXG2-2;Q6UXG2-3;Q6UXG2-4	0	0	0	0	0	0.457876	0	0	0.542124	0	0
E9PB51;Q9BWF3	0	0.569788	0	0	0	0	0	0	0	0.430212	0
E9PB61;Q86V81	0	1	0	0	0	0	0	0	0	0	0
E9PBC1;F6PQP6;I3L2B2;I3L2H1;I3L356;O95208;O95208-2;O95208-3;O95208-5	0	0	0	0.413904	0	0	0	0	0	0	0.586096
E9PBF9;H7C2N6;P15336	1	0	0	0	0	0	0	0	0	0	0
E9PBP6	0	0	1	0	0	0	0	0	0	0	0
E9PBZ2;P15428;P15428-2;P15428-4	0	0	0	0	0	0	1	0	0	0	0
E9PC53;H7C3N0;Q8TBK2;Q8TBK2-2	0.590162	0	0	0	0	0	0	0	0.409838	0	0
E9PC54;Q03113;Q03113-2;Q03113-3	0	0	0	0	0	0	0	0	0	0	1
E9PC61;G4U4J3;Q8NDF8;Q8NDF8-2;Q8NDF8-3;Q8NDF8-5	0	1	0	0	0	0	0	0	0	0	0
E9PC66;P17029	0	0	0	0	0	0.540465	0	0	0.459535	0	0
E9PC87;O94876;O94876-2	0	0	0	0	1	0	0	0	0	0	0
E9PC90;H0YA62;P14635;P14635-2	0	0	0.449843	0	0	0	0	0	0	0	0.550157
E9PCD7;H0YA68;Q9Y2E5;Q9Y2E5-2	0	0	0	0	0	0	0	0	0	1	0
E9PCJ7;G3V336;Q8N806	0	0	0	0	0	0	0.610874	0	0.389126	0	0
E9PCN2;Q02153;Q02153-2	0	0	0	0	0	0	1	0	0	0	0
E9PCP0;F5H0S8;F5H100;F5H8J8;P16520;P16520-2	0	0	0	0	0	0	0	0	0	0.449889	0.550111
E9PCQ7;F8WD67;F8WD87;O43709;O43709-2;O43709-3	0	0	0	0	0	0	0	0	1	0	0
E9PCW1;G5E9T8;K7EJC8;O95249	0	0	0	0	0	0.403807	0	0	0.596193	0	0
E9PCX2;P15121	0	0	0	0	0	0	1	0	0	0	0
E9PCX5	0	0	0	0	0	1	0	0	0	0	0
E9PD50;Q92540;Q92540-2;Q92540-4	0	0	0	0	0	1	0	0	0	0	0
E9PD53;Q9NTJ3;Q9NTJ3-2	0	0	0	0	0	0	0	0.423979	0	0.576021	0
E9PD68;Q14194;Q14194-2	0	0	0.218825	0	0	0	0	0	0.344856	0	0.436319
E9PDE8	0.525818	0	0	0	0	0	0	0	0.474182	0	0
E9PDN4	0	0	0.610765	0	0	0	0	0.389235	0	0	0
E9PE17;I3L0E3;Q9Y2R5	0	0	0	0	0	0	0	1	0	0	0
E9PEF1;O00408;O00408-3;O00408-4	0	0	0	0	0	0	1	0	0	0	0
E9PEJ6;H0Y547;P98196	0	0	0	0	0.6544	0	0	0	0	0	0.3456
E9PEP6;O14786	0	0	0	0	0.637683	0	0	0	0	0	0.362317
E9PEP7;P08048;P08048-2;P08048-3;P17010;P17010-2;P17010-3	0	0.656523	0	0	0	0	0	0	0.343477	0	0
E9PEQ6	0	0.509605	0.490395	0	0	0	0	0	0	0	0
E9PER6;O15530;O15530-2;O15530-3	0	0	0	0	0	0	1	0	0	0	0
E9PEW8	0	0	1	0	0	0	0	0	0	0	0
E9PEX6;P09622	0	0	0	0	0	0	0	1	0	0	0
E9PF10;O75694	0	1	0	0	0	0	0	0	0	0	0
E9PF16;Q96CM8;Q96CM8-2;Q96CM8-3	0	0	0	0	0	0	0	1	0	0	0
E9PF19;Q96E41;Q9Y4P3	0	0	0	0	0	0	0	1	0	0	0
E9PFK5;P78316;P78316-2	0	1	0	0	0	0	0	0	0	0	0
E9PFK9;Q9UJ41;Q9UJ41-3;Q9UJ41-4	0	0	0	0	0	1	0	0	0	0	0
E9PFR3;Q14738;Q14738-2;Q14738-3	0.305153	0	0	0	0	0	0.694847	0	0	0	0
E9PFR9;J3KQJ8;Q96N96;Q96N96-2;Q96N96-3;Q96N96-5;Q96N96-6	0	0	0	0.209214	0	0	0	0.790786	0	0	0
E9PG19;O94868;O94868-2	0	0	0	0	0	0	0	0	0.527336	0	0.472664
E9PG32;Q6ZR08	0	0	0	0	0	0	1	0	0	0	0
E9PG40;P05067;P05067-11;P05067-7;P05067-8;P05067-9	0	0	0	0	0	0	0	0	0	1	0
E9PG71;P54764;P54764-2	0	0	0.26816	0	0	0	0	0.73184	0	0	0
E9PG73;Q13427	0	1	0	0	0	0	0	0	0	0	0
E9PGC0;P20936;P20936-2;P20936-4	0	0	0	0	0	0	1	0	0	0	0
E9PGM7;O94988;O94988-1;O94988-3;O94988-5;O94988-6	0	0	0	0	0	0	1	0	0	0	0
E9PGQ0;Q96H78	0	0	0	0	0	0	0	1	0	0	0
E9PGT3;Q15418;Q15418-2;Q15418-4	0	0	0	0	0	0	1	0	0	0	0
E9PGT6;Q99627	0.366653	0	0	0	0	0	0.633347	0	0	0	0
E9PHI4;O94901-9	0	0	0.470667	0	0	0	0	0.529333	0	0	0
E9PHR9;Q9NRQ2;Q9NRQ2-2	0	0	0	0	0	0	0	0	0.404039	0	0.595961
E9PHT3;Q8IYS0;Q8IYS0-2	0	0	0	0	1	0	0	0	0	0	0
E9PHV5;P28290	0	0.284678	0	0.40143	0	0	0	0	0	0	0.313893
E9PHX8;H7C3L9;Q12866	0	0	0	0.486738	0	0	0	0	0	0	0.513262
E9PHY5;O43491-4	0	0	0	0.502478	0	0	0	0	0	0	0.497522
E9PHY8;Q8NDA8	0.36693	0	0	0	0	0.274542	0	0	0.358529	0	0
E9PI41	0	1	0	0	0	0	0	0	0	0	0
E9PI92	0	0	0	0	0	0	0	0.499154	0.500846	0	0
E9PIC5;Q8N4M1-4;Q8N4M1-5;Q8N4M1-6	0	1	0	0	0	0	0	0	0	0	0
E9PIF4;Q99519	0	0	0	0.217768	0.324281	0	0	0	0	0.239354	0.218598
E9PIG5;O00212	0	0	0	0	0	0	0	0	0	0	1
E9PIH9;F8WA39;H0YDX3;Q13613;Q13613-2;Q8NEC6	0	0	0	0	0	0	0	0.708846	0	0	0.291154
E9PIZ2;H0YDB8;Q8N3Y3	0	0	0.435936	0	0	0	0	0	0.564064	0	0
E9PJ20;E9PLF3;Q3MIX3	0	0	0	0	0	0	0	1	0	0	0
E9PJ55;Q9NUJ3	0	0	0	0	0	0	1	0	0	0	0
E9PJE4;Q9GZQ3	0	1	0	0	0	0	0	0	0	0	0
E9PJI1;Q92993;Q92993-2;Q92993-3;Q92993-4	0	1	0	0	0	0	0	0	0	0	0
E9PJJ5;E9PK99;E9PMS5;E9PRT1;Q4G0X4	0.425532	0	0	0	0	0	0.574468	0	0	0	0
E9PJN9	0	0	0	0	0	0	0	1	0	0	0
E9PJQ3;Q8N413;Q8N413-4	0	0	0	0	0	0	0	1	0	0	0
E9PJW8;E9PQA6;Q96EY5;Q96EY5-2;Q96EY5-3	0	0	1	0	0	0	0	0	0	0	0
E9PK14	0	0	0	0	0	0.372408	0	0	0.627592	0	0
E9PK25;G3V1A4;P23528	0	0	0	0	0	0	1	0	0	0	0
E9PK67;E9PNI7;Q53GL7	0	0	0	0	0	0	1	0	0	0	0
E9PK91;Q9NYF8;Q9NYF8-2;Q9NYF8-3	0	1	0	0	0	0	0	0	0	0	0
E9PKA8;E9PQL5;E9PSC8;Q6ZUT1;Q6ZUT1-2;Q6ZUT1-3	0	0.349545	0	0	0	0	0	0	0.320057	0.330398	0
E9PKC0;Q6IQ23;Q6IQ23-2	0	0.38307	0	0	0	0	0	0	0	0.262538	0.354392
E9PKE9;G3V148;Q9H920;Q9H920-2	0	0	0	0	1	0	0	0	0	0	0
E9PKF6;H7BXH2;Q5H9R7;Q5H9R7-2;Q5H9R7-5;Q5H9R7-6	0	0	0	0	0	0	1	0	0	0	0
E9PKG1;Q99873;Q99873-2;Q99873-3
E9PKN0;E9PQ01;O94913	0	1	0	0	0	0	0	0	0	0	0
E9PKP7;P17480-2	0	1	0	0	0	0	0	0	0	0	0
E9PKP8;E9PS00;H0YCN1;H0YED5;Q9Y5Q0	0	0	0.241306	0	0.429355	0	0	0	0.329338	0	0
E9PKQ8;E9PQ10	0	0	0	0	0	0	0	0.485341	0	0	0.514659
E9PKS9;E9PQE8;Q9Y296;Q9Y296-2
E9PKT4;Q8N131;Q8N131-2	0	0	0	0	0	0.343709	0	0	0.656291	0	0
E9PKT9;O96033	0	0	0	0	0	0	1	0	0	0	0
E9PKW1;Q9NS15;Q9NS15-2	0	0	0	0	0	0	0	0	1	0	0
E9PKW7	0	0	0	0	0	0.330059	0	0	0.669941	0	0
E9PL17;Q92989;Q92989-2	0	1	0	0	0	0	0	0	0	0	0
E9PL57	0	0	0	0	0	0	1	0	0	0	0
E9PLD0;Q9H0U4	0	0	0	0	1	0	0	0	0	0	0
E9PLI6;E9PNH5;E9PS76;Q8N9N8	0	0	0	0	0	0	0	0	1	0	0
E9PLK3;P55786	0	0	0	0	0	0	1	0	0	0	0
E9PLN8;F8W9H0;I3L3B4;Q9BQB6;Q9BQB6-2;Q9BQB6-3	0	0	0	0	1	0	0	0	0	0	0
E9PLP8;Q12996	0	0.735867	0	0	0	0	0	0.264133	0	0	0
E9PLS0;E9PNU3;E9PPL0;E9PQC8;E9PR23;E9PRA4;Q71H61	0	0.608621	0	0	0	0	0	0.391379	0	0	0
E9PLY5	0	0	0.24226	0	0	0	0.75774	0	0	0	0
E9PM19;P29597	0	0	0	0	0	0	0	0	0	0	1
E9PM62;Q5T9L3;Q5T9L3-2	0	0	0	0	0.410372	0	0	0.28297	0	0	0.306658
E9PM75;Q9NTG7	0	0	0	0	0	0	0	1	0	0	0
E9PM90;Q9UK41;Q9UK41-2	0	0	0	0	0	0	1	0	0	0	0
E9PMB9;Q16798	0	1	0	0	0	0	0	0	0	0	0
E9PMG5	0	0	0	0	0	0	0	0.401481	0	0	0.598519
E9PMI6;J3KN38;P54105	0	0	0	0	0	1	0	0	0	0	0
E9PMJ1;E9PS06;Q15771	0	0	0	0	1	0	0	0	0	0	0
E9PMJ5	0	0	0	0	0	0	0	1	0	0	0
E9PMQ6;Q00613;Q00613-2	0	0	1	0	0	0	0	0	0	0	0
E9PMR4;K4DIA7;P48509	0	0	0	0	0.531045	0	0	0	0	0	0.468955
E9PMS6	0	0.263375	0	0.42503	0	0	0	0	0	0	0.311595
E9PN76;Q8ND24;Q8ND24-2
E9PN78;Q4KMG0;Q4KMG0-2	0	0	0.453514	0	0	0	0	0	0.272413	0	0.274073
E9PN89	0.698788	0	0.301212	0	0	0	0	0	0	0	0
E9PNE5;Q9H1C4	0	0	0	0	0.718269	0	0	0	0	0	0.281731
E9PNL8;Q13574;Q13574-1;Q13574-3;Q13574-4;Q13574-5;Q13574-6;Q13574-7	0	0	0	0	0	0	0	0	0	0	1
E9PNN2	0	0.409336	0	0	0	0	0	0	0	0	0.590664
E9PNP3;E9PR47;Q9H7C9	0	0	0	0	0	0	1	0	0	0	0
E9PPC1	0	0	0.421437	0	0	0	0	0	0.578563	0	0
E9PPF6	0	0	0.595427	0	0	0	0	0	0	0	0.404573
E9PPQ1;J3KNE7;Q16890;Q16890-5	0	0	0.243586	0	0	0	0.756414	0	0	0	0
E9PPZ9;O43292;O43292-2	0	0	0	0	1	0	0	0	0	0	0
E9PQ59;Q6P4R8;Q6P4R8-2;Q6P4R8-3	0	0.647104	0	0	0	0	0	0.352896	0	0	0
E9PQ73;Q8TDW7;Q8TDW7-1	0.346213	0	0	0	0	0	0.653787	0	0	0	0
E9PQC9	0	0	0	0	0	0	0	0	0.426089	0.573911	0
E9PQD7;P15880	0	0	0	0.267288	0.39278	0	0	0.339932	0	0	0
E9PQM8;E9PRF4;Q15047;Q15047-3	0	0	0	0	0	0.519326	0	0	0.480674	0	0
E9PQY2;Q9NQP4	0	0	0	0	0	0	1	0	0	0	0
E9PQZ2;Q11206;Q11206-2;Q11206-3;Q11206-4;Q11206-5;Q11206-6;Q11206-7	0	0.453869	0	0	0	0	0	0	0.546131	0	0
E9PR30;P62861	0	0	0	0.422813	0	0	0	0.577187	0	0	0
E9PR76;E9PSH4;Q9H063	0	0.244868	0	0	0	0.433401	0	0	0.321732	0	0
E9PR92	0	0.230161	0.353922	0	0	0	0	0	0.415917	0	0
E9PRP3	0	0	0	0	0	0	0	1	0	0	0
E9PRQ7;Q04323	0	0	0	0	0	0	1	0	0	0	0
E9PRR7	0	0	0	0	0	0.235222	0	0	0.764778	0	0
E9PRU1;O95967	1	0	0	0	0	0	0	0	0	0	0
E9PS41;Q6RFH5;Q6RFH5-2	0	0.467999	0	0	0	0	0	0	0	0	0.532001
E9PS44;Q01628	0	0	0	0	0	0	0	0	0	1	0
E9PS74;Q8NBI5;Q8NBI5-2	0	0.227688	0	0	0	0	0	0.422881	0	0	0.349431
E9PSA5;Q96Q83	0	0	0	0	0	0.318862	0	0	0.681138	0	0
E9PSI1	0	0	0	0	0	0	1	0	0	0	0
ENSEMBL:ENSBTAP00000001528	0	0	0	0.479848	0	0	0	0	0	0	0.520152
ENSEMBL:ENSBTAP00000007350	0	0	1	0	0	0	0	0	0	0	0
ENSEMBL:ENSBTAP00000018229;Q3MHN5	0	0	0.537869	0	0	0	0	0	0.462131	0	0
ENSEMBL:ENSBTAP00000024146	0	0	0.310764	0	0.689236	0	0	0	0	0	0
ENSEMBL:ENSBTAP00000024462;ENSEMBL:ENSBTAP00000024466	0	0	0	0.480997	0	0	0	0.519003	0	0	0
ENSEMBL:ENSBTAP00000038329;REFSEQ:XP_001252647	0	0	0	0	0	0	0	0	1	0	0
F2Z2H4;J3KPC0;Q5VVY4;Q86XD8	0	0	0	0	0.59966	0	0	0	0.40034	0	0
F2Z2J1;Q15349;Q15349-2;Q15349-3	0	1	0	0	0	0	0	0	0	0	0
F2Z2U4;H0Y4W2;Q9Y4A5;Q9Y4A5-2	0	1	0	0	0	0	0	0	0	0	0
F2Z2W7;Q8IZ69;Q8IZ69-2	0	0	0	0	0	1	0	0	0	0	0
F2Z2X4;Q9C0E2
F2Z2X9	0	0	0	0	0.408111	0	0	0	0.312686	0.279202	0
F2Z357;J3KPC5;P47736;P47736-4
F2Z3K0	0	0	0	0	0	0	0	0	1	0	0
F2Z3N3;Q68BL8
F5GWB9;I3L1L5;I3L2B9;I3L4D7;I3L4R7;I3L517;Q8NHS9;Q8NHS9-2;Q8NHS9-3	0.75374	0.24626	0	0	0	0	0	0	0	0	0
F5GWD9;F5H227;F5H3B3;F6R851;Q8WVL7	0.66481	0	0	0	0	0	0	0	0.33519	0	0
F5GWH5;P61165	0	0	0	0	0.39258	0	0	0	0	0.248741	0.358679
F5GWI0;F5H2L3	0	0	0	0	0	0.386688	0	0	0.613312	0	0
F5GWI4;P00813	0	1	0	0	0	0	0	0	0	0	0
F5GX19;F5H3Y3;Q6IAA8	0	0	0	0	0	0	0	0	0	1	0
F5GX23;F5H5V4;J3KN29;O00233;O00233-2	0.338994	0	0	0	0	0	0.661006	0	0	0	0
F5GX26;Q7Z3Z4;Q7Z3Z4-2;Q7Z3Z4-3	0	0	0	1	0	0	0	0	0	0	0
F5GXC5;H3BUJ1;Q8TB96	0	0	0	0	0	0.320005	0	0	0.679995	0	0
F5GXH6	0	0	0	0.340752	0	0	0	0	0.31993	0	0.339319
F5GXI7;F5H142;F5H5J8;F5H7T6;H0YID4;Q6IMN6;Q6IMN6-10;Q6IMN6-2;Q6IMN6-3;Q6IMN6-5;Q6IMN6-6;Q6IMN6-7;Q6IMN6-9
F5GXJ1;F5H5N1;O75251;O75251-2	0	0	0	0	0	0	0	1	0	0	0
F5GXL4	1	0	0	0	0	0	0	0	0	0	0
F5GXW5;Q99622	0	0	1	0	0	0	0	0	0	0	0
F5GXX5;P61803	0	0	0	0	0.613007	0	0	0.386993	0	0	0
F5GXX6;F5H271;Q9NQ89	0	0	0	0	0	0.365986	0	0	0.634014	0	0
F5GY03;P09486	0	0	0	0	0.394717	0	0	0	0	0.250168	0.355115
F5GY80;F5H7G1;P07358	0	0	0	0	1	0	0	0	0	0	0
F5GYJ5;Q9NX18	0	0	0	0	0	0	0	1	0	0	0
F5GYK2;Q9NRL3;Q9NRL3-3
F5GYQ1;P61421	0	0	1	0	0	0	0	0	0	0	0
F5GYQ6;H7C1B8;H7C499;Q96HL8;Q96HL8-2;Q96HL8-3;Q96HL8-4;S4R3I7	0	0	0	0	0	0	0	0	1	0	0
F5GYQ7	0	0	0.579313	0	0	0.420687	0	0	0	0	0
F5GZ54	0	0.514401	0	0	0	0	0	0.485599	0	0	0
F5GZ97;Q9Y3C0
F5GZG1	0	0.341098	0	0	0	0	0	0	0	0	0.658902
F5GZQ1	0	0	0	0	0	0	0	0	1	0	0
F5GZY7;Q9H0R8;Q9H0R8-2	0	0	0	0	0	0	1	0	0	0	0
F5H001;F5H7N8
F5H039;Q9NQX3;Q9NQX3-2	0.394383	0	0	0	0	0	0.605617	0	0	0	0
F5H0C4;Q9BRP4;Q9BRP4-2	1	0	0	0	0	0	0	0	0	0	0
F5H0F9;Q9UJX4;Q9UJX4-3	0.691968	0.308032	0	0	0	0	0	0	0	0	0
F5H0R1;H3BRB1;Q9H6E5
F5H0U5;Q9NZD2	0	0	0	0	0	0	1	0	0	0	0
F5H101;F8WE42;Q76FK4;Q76FK4-4	0	1	0	0	0	0	0	0	0	0	0
F5H116	0	0	0	0	0	0	0	0.438994	0	0.561006	0
F5H157;Q15286	0	0	0	0	0.689302	0	0	0	0	0	0.310698
F5H199;F5H7C4;Q8IXL7-2	0	0	0	0	0	0	1	0	0	0	0
F5H1R2;Q8IY45;Q8IY45-2	0.624198	0	0	0	0	0	0	0	0.375802	0	0
F5H1R4;K7EM85;K7ES92;K7ES98;Q92619;Q92619-2
F5H1S1;Q92521	0	0	0	0	1	0	0	0	0	0	0
F5H1U9;O75970;O75970-3
F5H1Z6;Q9Y365	0	0	0	0	0	0	1	0	0	0	0
F5H265	0	0	0	0.521015	0	0	0	0.478985	0	0	0
F5H269;Q9Y485	0.711245	0	0	0	0	0.288755	0	0	0	0	0
F5H2B9;H0YNH8;Q9BZF9;Q9BZF9-2	0	0	0	0	0.640609	0	0	0	0	0	0.359391
F5H2J1;Q8WXR4;Q8WXR4-2;Q8WXR4-3;Q8WXR4-4;Q8WXR4-5;Q8WXR4-6;Q8WXR4-7	0	0.613812	0	0	0	0	0	0.203601	0	0	0.182587
F5H365;Q15436	0.432449	0	0	0	0	0.304207	0	0	0.263344	0	0
F5H369;O75747	0	1	0	0	0	0	0	0	0	0	0
F5H3G9;F5H4N6;Q9Y3R0;Q9Y3R0-2;Q9Y3R0-3	0	0	0	0	0	1	0	0	0	0	0
F5H3Y4;Q8IY37	0	0.467943	0	0	0	0	0	0.2464	0	0	0.285657
F5H442;Q99816	0	0	0	0	0	0	1	0	0	0	0
[truncated: 6,313 more rows]

## Sheet: E05_B_upper
localization combinations in chow
Protein	fCC_protein-complex	fCC_Nucleus	fCC_LD	fCC_Peroxisome	fCC_ER	fCC_endosome-vesicle	fCC_Cytoplasm	fCC_Mitochondria	fCC_Golgi apparatus	fCC_Lysosome	fCC_PM
A0A024QZ33;K7EK40;K7EMD8;K7ERM9;Q9H0G5	1	0	0	0	0	0	0	0	1	0	0
A0A024QZW4;Q9H1N7	0	0	0	0	0	1	0	0	1	0	0
A0A024QZX5;A0A087X1N8;A0A2R8YD12;P35237	0	0	1	0	0	0	0	0	0	0	0
A0A024R3B9;E9PJL7;E9PNH7;E9PRA8;P02511	1	0	0	0	0	0	0	0	0	0	0
A0A024R4E5;Q00341	0	0	0	0	0	0	0	1	0	0	0
A0A024R571;Q9H4M9	0	0	0	0	0	0	0	0	0	0	0
A0A024R5I4;O94956	0	0	0	0	1	0	0	0	0	1	1
A0A024R6I7;P01009	0	0	1	0	0	0	0	0	0	0	0
A0A024R7W5;A0A087WY31;A0A087X0Q1;Q7Z739	0	1	0	0	0	0	0	0	0	0	0
A0A024RA52;P25787	1	0	0	0	0	0	0	0	0	0	0
A0A024RAC6;Q14241	0	0	0	0	0	0	1	0	0	0	0
A0A024RBG1;Q9NZJ9-2	0	0	0	0	0	0	1	0	0	0	0
A0A024RCG2;Q96BI1	0	0	0	0	1	0	0	0	0	0	0
A0A024RCN4;A0A087X2F1;B4DMT1;Q16670;Q16670-2	0	1	0	0	0	0	0	0	0	0	1
A0A024RCQ8;A0A0G2JH76;A0A0G2JHB6;A0A0G2JIU6;A0A0G2JK02;A0A0G2JKR3;A0A0G2JLA3;A0A0G2JLL3;A0A140T8X7;A0A140T9Y1;G8JLL2;Q9UMR5;Q9UMR5-2;Q9UMR5-3	0	0	0	1	0	0	0	0	0	0	0
A0A024RCR6;A0A0G2JK23;P46379;P46379-2;P46379-3	0	0	0	0	0	0	1	0	0	0	0
A0A044PY82	0	0	0	0	0	0	0	0	0	1	1
A0A067XG54;Q8NB49;Q8NB49-2;Q8NB49-3;Q8NB49-4	0	0	0	0	0	0	0	0	0	0	0
A0A075B6F0;H7BXG6;M0R167;Q9H0D2;Q9H0D2-2	0	0	0	0	0	0	0	0	1	0	0
A0A075B6F9;Q9Y314	0	0	0	0	0	1	0	0	1	0	0
A0A075B6G3;A0A087WTU7;A0A087WV90;A0A5H1ZRP8;P11532;P11532-11;P11532-4	0	0	0	1	0	0	0	0	0	0	1
A0A075B6U9	0	0	0	0	0	0	0	1	0	0	0
A0A075B6W5	0	1	0	0	0	0	0	0	0	0	0
A0A075B727;A0A075B728;P16284;P16284-2;P16284-3;P16284-4;P16284-5;P16284-6	1	0	0	0	0	0	0	0	0	0	0
A0A075B730;P58107	0	1	0	0	0	0	0	1	0	0	0
A0A075B749;A0A087WX83;Q5VU43;Q5VU43-3;Q5VU43-4	0	0	0	0	0	0	0	0	0	0	0
A0A075B754;Q96QE3;Q96QE3-2	0	0	0	1	0	0	0	0	0	0	0
A0A075B773;K7ELY8;O00623	0	0	0	1	0	0	0	1	0	0	1
A0A075B784;E9PEW0;K7ELR5;Q8IXW9;Q9P275	0	1	0	0	0	0	0	0	0	0	0
A0A075B7B1;C9JIE4;O15061;O15061-2;O15061-3	0	0	0	0	0	0	0	0	1	1	0
A0A075B7B5;B7ZM87;O75044	0	0	0	0	0	0	1	0	0	0	0
A0A075B7F1;S4R3C0	0	0	1	0	0	0	0	0	0	0	0
A0A087WSV6;A0A087WSX8;A0A0B4J1W1;A0A0G2JLS4;A0A0G2JM99;A0A0G2JMY9;A0A0G2JNK9;A0A0G2JNM2;A0A0G2JNQ6;A0A0G2JNR3;A0A0G2JP64;A0A0G2JP80;A0A0G2JP96;A0A0G2JQ15;A0A0G2JQ44;A0A0G2JQ46;A8MVE2;D9IDM5;D9IDM6;F6RVM3;F6TER3;O75019;O75019-2;Q8N6C8;Q8N6C8-3;Q8NHL6;Q8NHL6-2;Q8NHL6-3;Q8NHL6-4;Q8NHL6-5	0	0	0	0	0	0	0	0	0	0	0
A0A087WSW7;A0A0B4J1V9;F6XU50;Q9NRZ9;Q9NRZ9-2;Q9NRZ9-3;Q9NRZ9-4;Q9NRZ9-5;Q9NRZ9-6	0	0	1	0	0	0	0	0	1	0	0
A0A087WSW9;A0A087WSY9;Q16881;Q16881-3;Q16881-4	0	0	0	0	0	0	1	0	0	0	0
A0A087WSY1;O15146;O15146-2;O15146-3;Q5T0B5	0	1	0	0	0	0	0	0	0	0	0
A0A087WSY5;Q96IY4	0	0	0	0	1	0	0	0	0	0	0
A0A087WSZ7;A0A1B0GW84;D6RHE0;Q08493;Q08493-2;Q08493-3;Q08499;Q08499-10;Q08499-11;Q08499-2;Q08499-3;Q08499-4;Q08499-5;Q08499-6;Q08499-8;Q08499-9;Q32MM7	0	0	0	0	0	0	1	0	0	0	0
A0A087WT18;Q96A73;Q96A73-2	0	0	0	0	0	0	0	1	0	1	1
A0A087WT20;Q9NV06	0	1	0	0	0	0	0	0	0	0	0
A0A087WT23;A0A087WV67;O00124;O00124-3	0	0	0	0	0	0	0	0	1	0	0
A0A087WT34	0	0	1	0	0	0	0	0	0	0	0
A0A087WT44	0	0	1	0	1	0	0	0	0	0	0
A0A087WT59;P02766	0	0	0	0	1	0	0	0	0	0	0
A0A087WT84;Q9H9V9;Q9H9V9-2	1	0	0	0	0	0	0	0	0	0	0
A0A087WT87;P43003;P43003-2	0	0	0	0	0	1	0	0	0	1	0
A0A087WT95;P49753	0	0	0	0	0	0	0	1	0	0	0
A0A087WTA5;E7ERK9;Q9UI10;Q9UI10-2;Q9UI10-3	1	0	0	0	0	0	0	0	0	0	0
A0A087WTA8;P08123	0	1	0	0	0	0	0	0	0	0	0
A0A087WTJ6;O14627;P47902;P47902-2;Q99626	0	0	0	0	0	0	0	0	1	0	0
A0A087WTK0;A0A087WVC6;Q12913	0	0	0	0	0	0	0	0	0	1	1
A0A087WTM1;Q9Y6N7;Q9Y6N7-2;Q9Y6N7-3;Q9Y6N7-4;Q9Y6N7-5;Q9Y6N7-6	0	0	0	1	0	0	0	0	0	0	0
A0A087WTP3;Q92945	0	1	0	0	0	0	0	0	0	0	0
A0A087WTQ2;A0A3B3IT47;C9JGR9;E7EQ49;Q9Y2I8;Q9Y2I8-2;Q9Y2I8-3	1	0	0	0	0	0	1	0	0	0	0
A0A087WTS0;H0YJK8;P18283	0	0	0	0	0	0	1	0	0	0	0
A0A087WTT2;Q5JWB9;Q96A57;Q96A57-2	0	0	0	0	0	0	0	0	1	0	0
A0A087WTU3;Q9Y6I9	0	0	0	0	0	0	0	0	0	0	0
A0A087WTV6;A0A087WZR9;Q96C36	0	0	0	1	0	0	0	1	0	0	0
A0A087WTY4;P49454	0	1	0	0	0	0	0	0	0	0	0
A0A087WTY7;Q9H227	0	0	0	0	0	0	1	0	0	0	0
A0A087WTZ8;E5RFJ1;E5RHW9;E5RIM1;Q96MF7	0	0	0	0	0	0	0	1	0	0	0
A0A087WU02;Q96RQ1	0	0	1	0	1	0	0	0	1	0	0
A0A087WU05;A0A087WY48;Q8IY22;Q8IY22-2;Q8IY22-3	0	1	0	0	0	0	0	0	0	0	0
A0A087WU07;Q5TGZ0;Q5TGZ0-2	0	0	0	0	0	0	0	1	0	0	1
A0A087WU25	0	0	0	0	0	0	0	1	0	0	0
A0A087WU31;A0A0A0MTB7;E9PE15;P51790;P51790-2;P51790-4;P51790-5	0	0	1	0	0	0	0	0	1	0	0
A0A087WU37;A0A087WWG3;A0A087X140;A0A0A0MRU4;A0A0A6YYH9;C9J3G2;H0Y857;Q5JTY5;Q5JTY5-2;Q5RIA9;Q5RIA9-3;Q5RIB0;Q5RIB3;Q8IUF1;Q9BRT8;Q9BRT8-2;Q9BRT8-3	0	0	0	0	0	0	0	0	0	0	0
A0A087WU51	1	0	0	0	0	0	0	0	1	0	0
A0A087WU53;Q9H0U3	0	0	0	0	1	0	0	1	0	0	0
A0A087WUB9;Q8WYA6;Q8WYA6-4	0	1	0	0	0	0	0	0	0	0	0
A0A087WUC6;E9PI68;Q15005	0	0	0	0	1	0	0	0	0	0	0
A0A087WUD3;Q9NRP0;Q9NRP0-2	0	0	0	0	0	0	0	0	0	0	0
A0A087WUE2	1	0	0	0	0	0	0	0	0	0	0
A0A087WUE4;A0A0G2JNN3;C9JMY0;Q96PV6;Q96PV6-1	0	1	0	0	0	0	0	0	0	0	1
A0A087WUE6;A4PB68;Q3T8J9;Q3T8J9-2;Q3T8J9-3;Q9H869;Q9H869-2;Q9H869-3;Q9H869-4;Q9H869-5;Q9H869-6;Q9H869-7;Q9H869-8;Q9H869-9	0	0	0	0	0	0	0	0	1	1	0
A0A087WUI6;Q8WXW3	0	0	0	0	1	0	0	0	1	0	0
A0A087WUJ1;Q9H400;Q9H400-2	0	0	0	1	0	0	0	0	0	0	1
A0A087WUJ4;Q92618	0	1	0	0	0	0	0	0	0	1	1
A0A087WUK2;O14979;O14979-2;O14979-3	0	1	0	0	0	0	0	0	0	0	0
A0A087WUL2	1	0	0	0	0	0	0	0	0	0	0
A0A087WUL4;A0A087WX23;A0A087WZG9;B4DSP0	1	0	0	0	0	0	0	0	0	0	0
A0A087WUM5;Q5VZR0;Q9H4G4	0	0	0	0	0	0	0	0	0	1	1
A0A087WUQ6;P07203	0	0	0	1	0	0	0	0	0	0	0
A0A087WUT0;A0A0A0MR39	0	1	0	0	0	0	0	0	0	0	0
A0A087WUT6;O60841	0	1	0	0	0	0	0	0	0	0	0
A0A087WUU8;M0R3J2	0	0	0	0	0	0	0	1	0	0	0
A0A087WUV9	0	0	1	0	0	0	0	0	0	0	0
A0A087WUW9;Q9NXU5	0	1	0	0	0	0	0	0	0	0	0
A0A087WUZ7;Q9Y5W8;Q9Y5W8-2	0	0	0	0	1	0	0	0	0	0	0
A0A087WV01	0	0	0	0	0	0	0	1	0	0	0
A0A087WV05;Q99417	0	0	0	0	0	0	0	0	0	0	0
A0A087WV24;P20711;P20711-3	0	0	0	0	0	0	1	0	0	0	0
A0A087WV25;O95684;O95684-2	0	0	1	0	0	0	0	0	0	0	0
A0A087WV39;Q92698;V9GYD3	0	1	0	0	0	0	0	0	0	1	1
A0A087WV96	0	0	1	0	0	0	0	0	1	0	0
A0A087WV97;Q8WU79;Q8WU79-2;Q8WU79-3	0	0	0	0	0	0	1	0	0	0	0
A0A087WVA1;P62341	0	0	0	0	1	0	0	0	0	0	0
A0A087WVA8;Q8IWB9;Q8IWB9-2	0	0	1	0	0	0	1	0	0	0	0
A0A087WVC1;Q9BQ39	0	1	0	0	0	0	0	0	0	0	0
A0A087WVE2;O00602	0	1	0	0	0	0	0	0	1	1	1
A0A087WVF1;K7EQH1;Q96B23;Q96B23-2	0	1	0	0	0	0	0	0	0	0	1
A0A087WVF7;Q9NZM3;Q9NZM3-2	0	1	0	0	0	0	0	0	0	0	0
A0A087WVI0;E9PBL8;Q8WTW3	1	0	0	0	0	0	1	0	0	0	0
A0A087WVM1;P78382;P78382-2;Q5W1L7	0	0	0	0	0	0	0	0	1	0	0
A0A087WVM4;B7ZM99	0	0	1	1	0	0	0	1	0	0	0
A0A087WVP7;P0C024;P0C024-2	0	0	0	1	0	0	0	0	0	0	0
A0A087WVQ6;Q00610;Q00610-2	0	0	0	0	0	1	0	0	0	0	0
A0A087WVS8;Q70IA6;Q70IA6-3	0	0	0	0	0	0	1	0	0	0	0
A0A087WVT6;A0A087X159;D6RAC5;P81877;P81877-2;P81877-3;P81877-4;P81877-5;Q9BWW4;Q9BWW4-2;Q9BWW4-3	0	0	0	0	0	1	0	0	1	0	0
A0A087WVT8;A0A087X1L3;Q6ZWJ8	0	0	0	1	0	0	0	0	0	1	1
A0A087WVX4;P49895;P49895-2;P49895-4	0	0	1	0	1	0	0	0	0	0	0
A0A087WVX5;A0A1B0GTA9;A0A1B0GTF6;A0A1B0GTN8;A0A1B0GTP5;A0A1B0GTS4;A0A1B0GTX2;A0A1B0GU53;A0A1B0GUI8;A0A1B0GUK4;A0A1B0GVB2;A0A1B0GWF9;A0A1C7CYX2;A0A2R8Y555;A0A2U3TZM7;A0A494C0B2;A0A494C0Z9;A0A494C184;E7EN11;F8VNV8;F8VU10;F8VUW8;H0Y476;O00305;O00305-2;O00305-3;O00305-4;P54284;P54284-2;P54284-3;P54284-4;P54284-5;Q02641;Q02641-2;Q02641-3;Q08289;Q08289-10;Q08289-2;Q08289-3;Q08289-4;Q08289-5;Q08289-6;Q0…	0	0	0	0	1	0	0	0	0	1	1
A0A087WVZ7;A0A087X068;Q9UJW7;Q9UJW7-2	0	0	0	0	0	0	0	0	1	1	0
A0A087WVZ9;A0A0A0MQR7;P19388	0	1	0	0	0	0	0	0	0	0	1
A0A087WW06;B0QYP5;Q96AY4	1	0	1	0	0	0	0	0	0	0	0
A0A087WW23;P20292	0	1	0	0	0	0	0	0	0	0	1
A0A087WW28	1	0	0	0	0	0	0	0	1	0	0
A0A087WW48;E7ET14;H0Y3N9;H0Y589;O75151;Q9UPP1;Q9UPP1-2;Q9UPP1-3;Q9UPP1-4;Q9UPP1-5	1	0	0	0	0	0	1	0	0	0	0
A0A087WW58;Q9C0D9	0	1	1	0	0	0	0	0	0	0	1
A0A087WW59;Q7Z7L8	0	0	0	0	0	0	1	0	0	0	0
A0A087WW66;Q99460;Q99460-2	1	0	0	0	0	0	0	0	0	0	0
A0A087WW76;A0A1B0GTZ9;A0A1B0GV73;A0A452Q6Z5;H0Y468;Q5T5U3	0	1	0	0	0	0	0	1	0	0	0
A0A087WW77;Q15334	0	0	0	0	0	1	0	0	0	0	0
A0A087WWA3;O60333;O60333-2;O60333-4;Q4R9M9	1	0	0	0	0	0	1	0	0	0	0
A0A087WWA7;O14640;O14640-2;P54792;P54792-2	0	0	0	0	0	0	0	0	1	0	0
A0A087WWF6;F8W8R3;P49005	0	0	0	0	0	0	0	0	0	0	0
A0A087WWG5	0	0	0	0	1	0	0	0	0	0	0
A0A087WWH3;Q9NZM4;Q9NZM4-2	0	1	0	0	0	0	0	0	0	0	0
A0A087WWI0	0	0	0	0	0	0	1	0	0	0	0
A0A087WWM0;O43617	1	0	0	0	0	0	1	0	0	0	0
A0A087WWM4;H0YNJ6;Q9P2T1;Q9P2T1-2	0	0	0	0	0	0	1	0	0	0	0
A0A087WWM6;E7EQL6;O43272;O43272-1;O43272-2	0	0	0	0	0	0	0	1	0	0	0
A0A087WWP4;A0A494C001;A0A499FJY3;Q96T37;Q96T37-2;Q96T37-3;Q96T37-4	0	1	0	0	0	0	0	0	0	0	0
A0A087WWP5;Q12962	0	1	0	0	0	0	0	0	0	0	0
A0A087WWP8;A0A0C4DGT8;A0A0C4DH79;Q5VWQ0;Q5VWQ0-4	0	0	0	0	0	0	0	1	0	0	1
A0A087WWQ2;Q92979;V9GYP5	0	1	0	0	0	0	0	0	0	0	0
A0A087WWR2;H3BQI4;H3BQS2;I3L2Z5;P56270;P56270-2;P56270-3;P56270-4	0	0	0	0	0	1	0	0	1	0	0
A0A087WWS1;Q96FV9	0	1	0	0	0	0	0	0	0	0	1
A0A087WWT7;A0A1W2PRP3;Q7Z7M1	0	0	0	0	0	1	0	0	1	1	0
A0A087WWU8	1	0	0	0	0	0	0	0	1	0	0
A0A087WWW9;O95999	0	0	0	0	0	0	1	0	0	0	0
A0A087WWY0;P08519	0	0	1	0	0	0	0	0	0	0	0
A0A087WX02;F8WB74;M0QYX1;P63302	0	0	1	0	0	0	0	0	0	0	0
A0A087WX10;G3V4M2;G3V5E8;P54803	0	0	0	0	0	0	0	1	0	0	0
A0A087WX11;J3KNG8;Q8TF40;Q8TF40-3	1	0	0	0	0	0	0	0	1	0	0
A0A087WX19;A0A087WX45;C9J5R6	0	0	0	0	0	0	0	1	0	0	0
A0A087WX80;A0A087WYF1;P24043	0	1	0	0	0	0	0	0	0	0	0
A0A087WX97;Q9BXK5	0	0	0	1	0	0	0	0	0	0	0
A0A087WX99;A0A0G2JRA4;P55283;P55283-2	0	0	0	0	0	0	0	0	0	1	1
A0A087WXB0;O15126	0	0	0	0	0	1	0	0	0	0	0
A0A087WXB8;C9J0E2;C9J480;C9JWJ3;C9JXM2;Q9Y274	0	0	0	0	0	0	0	0	1	0	0
A0A087WXC5;E7ESZ7;O95299	0	0	0	0	0	0	0	1	0	0	0
A0A087WXD1;Q96T83	0	0	0	0	0	1	0	0	1	0	0
A0A087WXI2;Q9Y6R7	0	0	0	1	0	0	0	1	0	1	0
A0A087WXI5;P12830;P12830-2	0	0	0	0	0	0	0	0	0	0	1
A0A087WXK4;Q7Z3F1	0	0	0	0	1	0	0	0	0	0	0
A0A087WXL6;B7Z879;Q9H270	0	0	0	0	0	1	0	0	0	0	0
A0A087WXM6;A0A0A6YYL6;J3KRX5;J3QQT2;P18621;P18621-3	0	0	0	0	1	0	0	1	0	0	0
A0A087WXN9;Q765P7	0	0	0	0	0	0	1	0	0	0	0
A0A087WXS6;C9JBF1	0	0	1	0	0	0	0	0	0	0	0
A0A087WXU0;A0A2R8Y4J4;Q9NWS8;Q9NWS8-2	0	0	0	0	0	0	0	1	0	0	0
A0A087WXV4;P41235;P41235-2;P41235-4;P41235-5;P41235-6	0	1	0	0	0	0	0	0	0	0	0
A0A087WXW3;Q9Y3P8	0	0	1	0	0	0	0	0	0	0	1
A0A087WXW6;A0A140TA70;A0A140TA74;A9JR48;Q9BXA9;Q9BXA9-2;Q9BXA9-3;Q9BXA9-4	1	1	0	0	0	0	0	0	0	0	0
A0A087WY00;F8W6H6;F8WE88;G3V394;Q9Y4I1;Q9Y4I1-2;Q9Y4I1-3	0	1	0	0	0	0	0	1	0	1	1
A0A087WY55;Q9NP79	0	0	0	0	0	0	1	0	0	0	0
A0A087WY67;P0CG29;P0CG30;Q6ICJ4	0	0	0	0	0	0	1	0	0	0	0
A0A087WY71;Q96CW1;Q96CW1-2	0	0	0	1	0	0	0	0	0	0	1
A0A087WY85;A0A0A0MQU3;D6RAH7;D6RFM0;H9KV45;P61077;P61077-2;P61077-3;P62837;P62837-2	1	0	0	0	0	1	0	0	0	0	0
A0A087WYD6;A0A0G2JLV0;Q03519;X5CMH5	0	0	1	0	1	0	0	0	0	0	0
A0A087WYF7;Q6UXV4	0	0	0	0	0	0	0	1	0	0	0
A0A087WYJ2;M0QZR8;M0R2B7;P28340	0	0	0	0	0	0	0	0	0	0	0
A0A087WYL3;Q17R60	0	0	0	0	0	0	0	1	0	1	0
A0A087WYL6;A0A087WZG6;A0A087X1S9;Q8TEW8;Q8TEW8-2;Q8TEW8-3;Q8TEW8-5;Q8TEW8-6;R4GN62	0	0	0	0	0	0	0	0	0	1	1
A0A087WYM3;A0A0A0MRF5;E7EWX6;Q8IXJ6;Q8IXJ6-2;Q8IXJ6-3;Q8IXJ6-4	0	0	0	0	0	0	0	0	0	0	0
A0A087WYN9;Q7Z478	0	0	1	0	0	0	0	0	0	0	0
A0A087WYP2;Q8IZQ5	0	0	0	0	0	0	1	0	0	0	0
A0A087WYR0;P09132	0	0	0	0	1	0	0	0	0	0	0
A0A087WYS3;Q9ULU4;Q9ULU4-10;Q9ULU4-11;Q9ULU4-12;Q9ULU4-13;Q9ULU4-19;Q9ULU4-22;Q9ULU4-7;Q9ULU4-8;Q9ULU4-9	0	0	0	0	0	0	1	0	0	0	0
A0A087WYT3;Q15185;Q15185-4	1	0	0	0	0	0	0	0	0	0	0
A0A087WYV9;A0A087X1F5;P57105	0	0	0	0	0	0	0	1	0	0	0
A0A087WYX8;A0A1W2PQW0;A0A590UJL7;A0A5F9ZH12;A0A5F9ZHT2;A0A6Q8PH73;Q14CM0	0	0	1	0	0	0	0	0	1	1	1
A0A087WYY0;A0A087X260;B1AKP7;G3V162;Q13148	0	1	0	0	0	0	0	0	0	0	0
A0A087WZ13;E9PAU2;Q8IY67;Q8IY67-2	0	0	0	0	0	0	1	0	0	0	0
A0A087WZ32;A8K727;Q9HB19	0	0	0	0	0	0	1	0	0	0	0
A0A087WZ40;Q14244;Q14244-6;Q14244-7	0	0	0	0	0	0	1	0	0	0	0
A0A087WZ50;Q8TCT7;Q8TCT7-2;Q8TCT7-4	1	1	0	0	0	0	0	0	0	0	0
A0A087WZ62;Q9H6U8;Q9H6U8-3	0	0	1	0	1	0	0	0	1	0	0
A0A087WZ97;A0A087WZK6;A0A087X2C2;Q5T7M9	0	0	0	0	0	1	0	0	1	0	0
A0A087WZB5	0	1	0	0	0	0	0	0	0	0	0
A0A087WZC2;A0A0C4DGS8;E0YMJ8;P35680;P35680-2;P35680-3;P35680-4	0	1	0	0	0	0	0	0	0	1	1
A0A087WZE9	0	1	1	0	0	0	0	0	0	0	0
A0A087WZG4;A0A3B3IPE9;A0A590UK10;Q6ZSZ5;Q6ZSZ5-1;Q6ZSZ5-2;Q6ZSZ5-5;Q6ZSZ5-6	0	0	1	0	0	0	1	0	0	0	0
A0A087WZK9;B3KS98;O15372	1	0	0	0	0	1	0	0	0	0	0
A0A087WZM2;D6REQ6;D6RHI9;O00584	0	0	0	0	0	0	0	0	0	1	0
A0A087WZM8;Q8TBM7;Q8TBM7-2;Q8TBM7-3	0	0	0	0	1	0	0	0	1	0	0
A0A087WZN1;O43837	0	0	0	0	0	0	0	1	0	0	0
A0A087WZP9	0	0	0	0	1	0	0	0	0	0	0
A0A087WZQ7;Q9H115	0	0	0	0	0	0	0	0	1	0	0
A0A087WZT0;M0QY61;M0QZ22;M0R0X3;Q5PRF9	0	0	0	0	0	1	0	0	1	0	0
A0A087WZT2;Q6UX53	0	0	1	0	1	0	0	0	0	0	0
A0A087WZT3;Q9H3K6	1	0	0	0	0	0	0	0	0	0	1
A0A087WZU2;E5RGN0;Q00536;Q00536-2;Q00536-3	0	0	0	0	0	0	1	0	0	0	0
A0A087WZU5;O43657	0	0	0	0	0	0	0	0	0	0	0
A0A087WZV0;O43314	0	1	0	0	0	0	0	0	0	0	0
A0A087WZY5;A8MXH5;F5H3Q5;F5H851;Q14031;Q14031-2	0	0	0	0	1	0	0	0	0	0	0
A0A087X011;E9PES4;J3KPF9;Q9Y496	1	0	0	0	0	1	0	0	0	0	0
A0A087X020;Q9Y3A5	0	0	0	0	0	0	0	0	0	0	0
A0A087X080;A0A0U1RRH1;A0A0X1KG73;Q15413;Q15413-2;Q15413-3	0	0	1	0	0	0	0	0	1	0	0
A0A087X091	0	0	0	0	0	1	0	0	1	0	0
A0A087X0D5;P09668	0	0	0	1	0	0	0	0	0	1	0
A0A087X0F1;Q9UK61;Q9UK61-2;Q9UK61-3;Q9UK61-4	0	1	0	0	0	0	0	0	0	0	0
A0A087X0H8;Q15714;Q15714-2;Q15714-3	1	1	0	0	0	0	0	0	0	0	0
A0A087X0H9;Q5T8P6	0	1	0	0	0	0	0	0	0	0	0
A0A087X0K0;P39059	0	1	0	0	0	0	0	0	0	0	0
A0A087X0K4;Q7Z408;Q7Z408-2;Q7Z408-4	0	1	0	0	0	0	0	0	0	0	0
A0A087X0K9	0	1	0	0	0	0	0	0	0	1	1
A0A087X0L7;E7EVY0;J3KNA0;Q15070;Q15070-2	0	0	0	0	0	0	0	1	0	0	0
A0A087X0M4;Q9BWU0	1	1	0	0	0	0	0	0	0	0	0
A0A087X0P0	0	1	0	0	0	0	0	1	0	0	0
A0A087X0Q9;Q9BVL4	0	0	0	0	0	0	0	0	0	0	0
A0A087X0R6;Q9UMY4;Q9UMY4-1	0	0	0	0	0	0	1	0	0	0	0
A0A087X0R7;Q9H4L4	0	1	0	0	0	0	0	0	0	0	0
A0A087X0R9;B8ZZK1;Q07837;Q07837-2;Q07837-5;Q07837-6;Q07837-7	0	0	1	0	0	0	0	0	0	1	1
A0A087X0S5;P12109	0	1	0	0	0	0	0	0	0	0	0
A0A087X0T5;Q96AB6	1	0	0	0	0	0	0	0	0	0	0
A0A087X0V5;P29728;P29728-2	0	0	1	0	0	0	0	0	0	0	0
A0A087X0W8;Q04206;Q04206-2;Q04206-3;Q04206-4;Q2TAM5	0	0	0	0	0	0	1	0	0	0	0
A0A087X0W9;Q8N6M0	1	0	0	0	0	1	0	0	0	0	0
A0A087X0X3;P52272;P52272-2	0	1	0	0	0	0	0	0	0	0	0
A0A087X0Y2;A0A087X248;A0A087X2I9;A0A096LPD8;F5GWV3;F5H3N7;F5H8B4;O14607;O14607-2;O14607-3;O14607-4;O14607-5	0	1	0	0	0	0	0	0	0	0	0
A0A087X108	1	0	0	0	0	0	1	0	0	0	0
A0A087X117;A0A0G2JN29;Q15155	0	0	0	0	1	0	0	1	0	0	0
A0A087X138;Q8TF71	0	0	1	0	0	0	0	0	0	1	1
A0A087X1A8;A0A2R8Y3X7;D3VVH9;F5H211;G3V3R7;P54252;P54252-1;P54252-4	0	0	0	0	0	0	1	0	0	0	0
A0A087X1B2	0	1	0	0	0	0	0	0	0	0	0
A0A087X1B6;E9PEG3;F5GZG9;P10275;P10275-3;P10275-4	0	0	0	0	0	0	1	0	0	0	0
A0A087X1E4;P53365;P53365-3	1	0	0	0	0	0	1	0	0	0	0
A0A087X1G1;H7BYD0;Q16718;Q16718-2	0	0	0	0	0	0	0	1	0	0	0
A0A087X1G4	0	0	0	0	0	0	0	0	0	1	0
A0A087X1J2	0	0	0	0	0	0	0	1	0	0	0
A0A087X1J7;P22352	0	1	0	0	0	0	0	1	0	0	0
A0A087X1K1;Q96C00	0	0	1	0	0	0	0	0	1	0	0
A0A087X1N3;F8WC38;O75818;O75818-2	1	0	0	0	0	0	0	0	0	0	1
A0A087X1N7;P20929;P20929-2;P20929-3;P20929-4	0	0	0	0	0	0	0	0	1	0	0
A0A087X1P3;C9IYE1;F8W8P5;H7BYR4;Q86UW7;Q86UW7-2;Q86UW7-3	0	0	0	0	0	0	0	0	1	0	0
A0A087X1P5;J3KQ41;J3QT95;Q9H9Q2;Q9H9Q2-3	0	1	0	0	0	0	0	0	0	0	0
A0A087X1R3;A0A0C4DGX0;A6QL64;Q8N2N9	0	0	0	0	0	0	1	0	0	0	0
A0A087X1S3	0	0	0	0	0	1	0	0	1	0	0
A0A087X1W8;A0A0A0MTJ8;Q9BY67;Q9BY67-3;Q9BY67-4;Q9BY67-5;X5DQS5	0	0	0	0	0	0	0	0	0	0	1
A0A087X1Z1;A0A0G2JPW5;A0A0G2JQX1;A0A0G2JSA7;Q96RT8;Q96RT8-2	0	0	1	0	0	0	0	0	0	0	0
A0A087X1Z3;Q9UL46	1	0	0	0	0	0	1	0	0	0	0
A0A087X236;A0A0A0MRE2;C9J2A8;Q9NVP4;Q9NVP4-2;Q9NVP4-3;Q9NVP4-4;Q9NVP4-5	0	0	0	0	0	0	0	1	0	0	1
A0A087X241;Q2NKQ1;Q2NKQ1-3;Q2NKQ1-4	0	0	0	0	0	0	0	0	0	0	0
A0A087X256;Q2M389	0	0	0	0	0	1	0	0	0	0	0
A0A087X266;Q9BXJ8	0	0	0	0	0	1	0	0	0	0	0
A0A087X279;P09913	0	0	0	0	0	0	1	0	0	0	0
A0A087X294;O75914;O75914-2;O75914-3;O75914-4	0	0	0	0	0	0	1	0	0	0	0
A0A087X295;E9PDU5;Q9NNW5	0	0	0	0	0	0	1	0	0	0	0
A0A087X296;P23219;P23219-2;P23219-3;P23219-4;P23219-5;P23219-6	0	0	0	0	0	0	0	1	0	0	1
A0A087X2A7;H0YBA5;H7BY63;Q8NB25;Q8NB25-2;Q8NB25-3;Q8NB25-4	0	0	0	0	0	0	0	0	1	1	0
A0A087X2B5;P35613;P35613-2	0	0	0	0	0	0	0	0	0	1	1
A0A087X2D5;Q9BRJ2	0	1	0	0	0	0	0	1	0	0	0
A0A087X2D8;O60271-2;O60271-4	0	0	0	0	0	0	1	0	0	0	0
A0A087X2G6;A0A0C4DGU5;D6RIC3;Q9Y3C1;Q9Y3C1-2;Q9Y3C1-3	0	1	0	0	0	0	0	0	0	0	0
A0A087X2I1;P62333	1	0	0	0	0	0	0	0	0	0	0
A0A088AWN3;A0A0A0MSY4;Q9BZ29;Q9BZ29-3;Q9BZ29-4;Q9BZ29-5	0	0	0	1	0	0	0	1	0	0	0
A0A088AWN8;E7EP87;E9PH27;J3KS48;J3KT43;J3QRB0;Q9UHQ1;Q9UHQ1-2;Q9UHQ1-3;Q9UHQ1-4	0	0	1	0	0	0	1	0	0	0	0
A0A090HNM7;A0A1W2PS85;P28715;R4GMW8	0	1	0	0	0	1	0	0	0	0	0
A0A096LNH6;Q14185	0	1	0	0	0	0	0	0	0	0	0
A0A096LNV3;A0A096LP02;Q9Y508;Q9Y508-2	0	0	1	0	0	0	0	0	1	0	0
A0A096LP07;A0A096LPJ3;A8K070	0	0	0	0	0	0	0	0	0	0	0
A0A096LP22;A0A096LP34;C9J7Z1;Q86Y79	0	1	0	0	0	0	0	1	0	0	0
A0A096LP69	0	0	0	0	0	0	0	0	0	1	1
A0A096LPC5;A0A0A0MR88;Q9Y4E1;Q9Y4E1-1;Q9Y4E1-2;Q9Y4E1-6	0	0	0	0	0	0	0	0	1	0	0
A0A096LPE2	0	0	1	0	1	0	0	0	0	0	0
A0A096LPI6	0	0	0	0	0	0	0	1	0	0	0
A0A096LPJ4;P05161	0	0	0	0	0	0	1	0	0	0	0
A0A096LPJ9;A0A140G945;A0A140G945-2;E7EWH7;P02489	1	0	0	0	0	0	0	0	0	0	0
A0A0A0MQR2;Q9BY42	0	0	0	0	0	0	1	0	0	0	0
A0A0A0MQR4;I3L2J0;Q96RK0	0	1	0	0	0	0	0	0	0	0	0
A0A0A0MQS1;Q53H96;Q53H96-2	0	0	1	0	0	0	0	0	0	0	0
A0A0A0MQS9;A0A0A0MTC7;Q16363;Q16363-2	0	1	0	0	0	0	0	1	0	0	1
A0A0A0MQT0;P09455	0	0	0	0	0	0	1	0	0	0	0
A0A0A0MQU0;Q9BV38;U3KQC1	0	1	0	0	0	0	0	0	0	0	0
A0A0A0MQU4;Q96I15	0	0	0	0	0	0	1	0	0	0	0
A0A0A0MQU7;A0A0A0MTK8;F5H0K0;P20823;P20823-2;P20823-3;P20823-7;U3KQS6	0	1	0	0	0	0	0	0	0	0	0
A0A0A0MQV6;P09038;P09038-1;P09038-2;P09038-3	0	1	0	0	0	0	0	0	0	0	0
A0A0A0MQX1;D6RGD1;Q9HD67	0	1	0	0	0	0	0	0	0	1	1
A0A0A0MQX8;C9JP00;Q9NR56;Q9NR56-2;Q9NR56-5;Q9NR56-6;Q9NR56-7	0	1	0	0	0	0	0	0	0	0	0
A0A0A0MQY7;A0A3B3ISH2;Q5VU97	0	0	0	0	0	0	0	0	0	0	0
A0A0A0MR02;P45880;P45880-1;P45880-2	0	0	0	0	0	0	0	1	0	0	0
A0A0A0MR03;A0A0J9YWB6;A0A0J9YWJ4;K7EJD2;Q9Y5B0;Q9Y5B0-4	0	0	0	0	0	0	1	0	0	0	0
A0A0A0MR05;H3BM50;H3BN58;H3BPT1;H3BPU5;Q9BVC4;Q9BVC4-4;Q9BVC4-5	0	0	0	0	0	0	0	0	0	1	0
A0A0A0MR07;F5H5P4;P15498;P15498-2;Q96D37	1	0	0	0	0	0	1	0	0	0	0
A0A0A0MR09;P43378	0	1	1	1	0	0	0	0	0	0	0
A0A0A0MR11;A0A0A0MRS1;Q06730;Q06730-2;Q06730-3	0	0	0	0	0	0	0	0	0	1	1
A0A0A0MR25;A0A5S6RJB7;D2CGD1;E7EVR7;H7BXU9;H7C265;P21802;P21802-15;P21802-16;P21802-17;P21802-18;P21802-2;P21802-20;P21802-21;P21802-22;P21802-23;P21802-3;P21802-4;P21802-5;P21802-6;P21802-8;S4R381	0	0	0	0	0	1	0	0	1	0	0
A0A0A0MR36;Q9ULV0-2	0	0	0	0	0	0	0	0	0	0	0
A0A0A0MR51;H7C2V0;O60427	0	0	0	0	1	0	0	1	0	0	0
A0A0A0MR67;A0A0A0MSA1;E9PDI6;F5GY28;F5H522;Q13936;Q13936-10;Q13936-11;Q13936-12;Q13936-13;Q13936-14;Q13936-15;Q13936-16;Q13936-17;Q13936-18;Q13936-19;Q13936-2;Q13936-20;Q13936-21;Q13936-22;Q13936-23;Q13936-24;Q13936-25;Q13936-26;Q13936-27;Q13936-28;Q13936-29;Q13936-3;Q13936-30;Q13936-31;Q13936-32;Q13936-33;Q13936-34;Q13936-35;Q13936-36;Q13936-37;Q13936-4;Q13936-5;Q13936-6;Q13936-7;Q13936-8;Q13936…	0	0	1	0	0	0	0	0	0	0	0
A0A0A0MR74;O75907	0	0	0	0	1	0	0	0	0	1	0
A0A0A0MRA5;B7Z4B8;M0R3F1;Q9BUJ2;Q9BUJ2-2;Q9BUJ2-4	0	1	0	0	0	0	0	0	0	0	0
A0A0A0MRA8;A8K968;Q9Y2J2;Q9Y2J2-2	0	0	0	1	0	0	0	0	0	0	1
A0A0A0MRB5;Q8WXG6;Q8WXG6-2;Q8WXG6-3;Q8WXG6-4;Q8WXG6-5;Q8WXG6-6;Q8WXG6-7;Q8WXG6-8	1	0	0	0	0	0	1	0	0	0	0
A0A0A0MRD0;A0A2R8YCE3;F5H4B4;F5H4B4-2	0	0	1	0	0	0	0	0	0	0	0
A0A0A0MRE5;Q9ULH1;Q9ULH1-2	0	0	0	0	0	0	0	0	0	0	0
A0A0A0MRF6;Q99996;Q99996-1;Q99996-3;Q99996-5;Q99996-6	0	0	0	0	0	0	0	0	0	0	0
A0A0A0MRF9;P16885	0	0	0	0	0	0	1	0	0	0	0
A0A0A0MRG8;Q16611	0	0	0	1	0	0	0	1	0	0	0
A0A0A0MRH3;Q9Y2W7;Q9Y2W7-2;Q9Y2W7-3	0	1	0	1	0	0	0	0	0	0	0
A0A0A0MRI1;Q8IXQ4	0	0	0	1	0	0	0	1	0	0	0
A0A0A0MRI2;Q9UNH7	1	0	0	0	0	0	1	0	0	0	0
A0A0A0MRJ0;Q5VT25;Q5VT25-2;Q5VT25-3;Q5VT25-4;Q5VT25-5;Q5VT25-6	0	1	1	0	0	0	0	0	0	1	1
A0A0A0MRJ6	0	0	0	0	0	0	1	0	0	0	0
A0A0A0MRJ7;P12259	0	0	1	0	1	0	0	0	0	0	0
A0A0A0MRM2;Q86VF7;Q86VF7-2;Q86VF7-3;Q86VF7-4	0	0	0	0	0	1	0	0	1	0	0
A0A0A0MRM9;Q14978;Q14978-2;Q14978-3	0	1	0	0	0	0	0	0	0	0	0
A0A0A0MRP6;B7ZLQ5;P28370;P28370-2	0	1	0	0	0	0	0	0	0	0	1
A0A0A0MRR7;P09234	0	1	0	0	0	0	0	0	0	0	0
A0A0A0MRT2;Q9BTA9;Q9BTA9-2;Q9BTA9-5	0	0	0	0	0	1	0	0	0	1	0
A0A0A0MRT6;Q8IZP0;Q8IZP0-2;Q8IZP0-3;Q8IZP0-4;Q8IZP0-5;Q8IZP0-6;Q8IZP0-9	0	0	0	0	0	0	0	0	0	0	0
A0A0A0MRW6;Q9H6R4;Q9H6R4-2;Q9H6R4-4	0	1	0	0	0	0	0	0	0	0	1
A0A0A0MRX1;A0A0R4J2E6;A0A494C0F8;A0A494C147;A0A494C1D9;B1APY9;P26378;P26378-1;P26378-2;P26378-3;P26378-4;P26378-5;Q12926;Q12926-2	0	0	0	0	0	0	0	0	0	0	0
A0A0A0MRX8;A0A1B0GWI9;A0A1B0GWJ4;A0A2R8Y7V8;O00712;O00712-4;O00712-5;Q5VW26;Q5VW27;Q5VW30;U3KQE8	0	1	0	0	0	0	0	0	0	0	0
A0A0A0MRY0;B0QYI1;Q8WUA7;Q8WUA7-2;Q8WUA7-3;Q8WUA7-4	0	0	0	0	0	0	1	0	0	0	0
A0A0A0MRZ1;Q9H9P5-1;Q9H9P5-3	0	0	0	0	0	1	0	0	0	0	0
A0A0A0MRZ4;E7EMV7;Q15025;Q15025-2;Q15025-3;Q15025-4;Q15025-5;Q15025-6;Q15025-7;Q15025-8	0	0	0	0	0	0	0	0	0	0	0
A0A0A0MS14	0	0	1	0	0	0	0	0	0	0	0
A0A0A0MS59;A0A0C4DFX4;Q6ZRS2;Q6ZRS2-2;Q6ZRS2-3	0	1	0	0	0	0	0	0	0	0	0
A0A0A0MS79;O14513	1	0	0	0	0	1	0	0	0	0	0
A0A0A0MS87	0	0	0	0	0	0	1	0	0	0	0
A0A0A0MS99;I3L4X2;P33527;P33527-2;P33527-3;P33527-5;P33527-9	0	1	0	0	0	0	0	0	0	1	1
A0A0A0MSA9;A0A0C4DG49;P15151;P15151-2;P15151-3;P15151-4	0	0	1	0	0	0	0	0	1	1	1
A0A0A0MSB4;Q6ZN50;Q969R2;Q969R2-2;Q969R2-3;Q969R2-6	0	1	0	0	0	0	0	0	1	0	0
A0A0A0MSB8;Q9UPT5;Q9UPT5-1;Q9UPT5-2;Q9UPT5-5;Q9UPT5-6	0	0	0	0	0	0	0	0	0	0	0
A0A0A0MSE3;D3DNG8;P30556	0	0	0	0	0	0	0	0	0	1	1
A0A0A0MSG0;A6NGB9	0	0	1	0	0	0	0	0	0	0	0
A0A0A0MSH9;A0A494C1F7;A0A494C1P7;Q86WJ1;Q86WJ1-2;Q86WJ1-4	0	1	1	0	0	0	0	0	0	0	0
A0A0A0MSI2;B3KPJ4;Q8IXK0;Q8IXK0-2;Q8IXK0-3;Q8IXK0-4;Q8IXK0-5	0	0	0	0	0	0	1	0	0	0	0
A0A0A0MSI6;B7Z1P2;Q9H4M3;Q9H4M3-2	1	1	1	0	0	0	0	0	0	0	0
A0A0A0MSI8;O00471	0	0	0	0	0	0	0	0	0	0	0
A0A0A0MSJ9;Q15283;Q15283-2	0	0	1	0	0	0	0	0	0	1	0
A0A0A0MSK3;A0A0C4DH47;A0A498U6I9;C9JS68;P24557;P24557-2;P24557-3;P24557-4;Q53F23	0	1	0	0	0	0	0	0	0	0	0
A0A0A0MSK6;Q13017;Q13017-2	0	0	0	0	0	0	0	0	0	0	0
A0A0A0MSL1;Q8TDM6;Q8TDM6-2;Q8TDM6-3;Q8TDM6-4	0	1	0	0	0	0	0	1	0	0	1
A0A0A0MSM0	0	0	0	0	0	0	0	0	1	0	0
A0A0A0MSP4;Q86WC4	0	0	1	0	0	0	0	0	0	1	0
A0A0A0MSQ0;P13797;P13797-2	0	0	0	0	0	0	0	0	0	0	0
A0A0A0MSS0;P60880	0	0	0	0	1	0	0	0	0	1	1
A0A0A0MSS8;P42330	0	0	0	0	0	0	1	0	0	0	0
A0A0A0MST8;C9JRP1;E9PFN4;Q9Y6M7;Q9Y6M7-12;Q9Y6M7-13;Q9Y6M7-2;Q9Y6M7-6;Q9Y6M7-7;Q9Y6M7-8;Q9Y6M7-9	0	0	0	0	0	0	0	0	0	1	1
A0A0A0MSU4;O94911-3	0	0	1	0	0	0	0	0	0	0	1
A0A0A0MSV9;A0A0G2JH37;A0A0G2JKZ1;A2AB90;O15533;O15533-2;O15533-3	0	0	0	0	1	0	0	0	0	0	0
A0A0A0MSW2;E9PEI2;Q9BQW3;Q9BQW3-1	0	0	0	0	0	0	0	1	0	0	1
A0A0A0MSX9;P41252	1	0	0	0	0	0	0	0	0	0	0
A0A0A0MSY7;O00142;O00142-4;O00142-6	0	0	0	0	0	0	0	1	0	0	0
A0A0A0MSZ9;Q05048	0	1	0	0	0	0	0	0	0	0	0
A0A0A0MT02;A2ABK4;P18615;P18615-3	0	0	0	0	0	1	0	0	0	0	0
A0A0A0MT16;Q86UQ4;Q86UQ4-3;Q86UQ4-4	0	0	0	0	0	0	0	0	0	1	1
A0A0A0MT32;P38571;P38571-2	0	0	0	0	0	0	0	0	0	0	0
A0A0A0MT35;A0A2P0CTB1;Q8TBF2;Q8TBF2-3	0	0	0	1	0	0	0	0	0	0	0
A0A0A0MT61;G5E979;H7BYM2;Q8WYN0;Q8WYN0-3;Q8WYN0-5	0	0	0	1	0	0	0	0	0	0	0
A0A0A0MT72;C9JUH3;Q9BSQ5;Q9BSQ5-2;Q9BSQ5-3	1	0	0	0	0	1	0	0	0	0	0
A0A0A0MT83;P26440	0	0	0	0	0	0	0	1	0	0	0
A0A0A0MT93	0	0	0	0	0	0	0	0	1	0	1
A0A0A0MTC2;D6RA37;D6RDV0;D6RIY7;Q13454;Q13454-2	0	0	0	0	1	0	0	1	0	0	0
A0A0A0MTG5;P13232;P13232-2;Q5FBX5	0	0	1	0	0	0	0	0	1	0	0
A0A0A0MTH3	0	0	0	0	0	0	0	0	0	0	0
A0A0A0MTH9;O14981	1	1	0	0	0	0	0	0	0	0	0
A0A0A0MTJ9;Q6PIU2;Q6PIU2-2	0	0	0	0	1	0	0	1	0	0	0
A0A0A0MTK0;A0A0A0MTP0;F5GWB1;Q7Z6B0;Q7Z6B0-2	1	0	0	0	0	0	1	0	0	0	0
A0A0A0MTL6;Q6ZS17;Q6ZS17-2;Q6ZS17-3;Q6ZS17-4	0	0	1	0	0	0	1	0	0	0	0
A0A0A0MTL7;A0A0D9SGH8;C6ZRJ6;C6ZRJ7;C6ZRK5;E2GH26;Q5JRY3;Q5JRY4;Q5JRY5;Q5VVR7;Q9NQB0;Q9NQB0-10;Q9NQB0-11;Q9NQB0-12;Q9NQB0-13;Q9NQB0-14;Q9NQB0-15;Q9NQB0-16;Q9NQB0-17;Q9NQB0-2;Q9NQB0-3;Q9NQB0-4;Q9NQB0-5;Q9NQB0-6;Q9NQB0-7;Q9NQB0-8;Q9NQB0-9	0	1	0	0	0	0	0	0	0	0	1
A0A0A0MTN0;Q13617;Q13617-2	1	0	0	0	0	0	1	0	0	0	0
A0A0A0MTN3	0	0	1	0	0	0	0	0	0	0	0
A0A0A0MTP7;F8VXG7;Q99590;Q99590-2	1	1	0	0	0	0	0	0	0	0	0
A0A0A0MTQ3;Q96N23;Q96N23-2	0	0	1	0	0	0	0	0	1	0	0
A0A0A0MTQ8;P0C221	0	1	0	0	0	0	0	0	0	1	1
A0A0A0MTR7;Q63HN8	1	0	0	0	0	1	0	0	0	0	0
A0A0A0MTS7;Q8WZ42;Q8WZ42-12;Q8WZ42-13;Q8WZ42-2;Q8WZ42-8	0	0	0	0	0	0	0	1	0	0	0
A0A0A0MTS9;K7EKZ0;K7EP24;K7ER94;Q2V2M9;Q2V2M9-2;Q2V2M9-3;Q2V2M9-4	0	0	0	0	0	0	0	0	1	1	0
A0A0A0MTU3;Q4ZIN3;Q4ZIN3-2	0	0	0	0	1	0	0	0	0	0	0
A0A0A6YYA0;Q86XR7-2;Q9Y3B3;Q9Y3B3-2	0	0	0	0	1	0	0	0	1	0	0
A0A0A6YYC0;E9PJN1;O75676;O75676-2	1	0	0	0	0	0	0	0	0	0	0
A0A0A6YYC7;Q96JP5;Q96JP5-2	1	1	0	0	0	0	0	0	0	0	0
A0A0A6YYG9;F8WCF6;F8WDD7;P59998;P59998-2;P59998-3	0	0	0	0	0	0	1	0	0	0	0
A0A0A6YYH1;Q7Z6K5;Q7Z6K5-2	0	0	0	0	0	0	1	0	0	0	0
A0A0A6YYI3;A0A0B4J1V8;A8MV53;Q9NQ55;Q9NQ55-2;Q9NQ55-3	0	1	0	0	0	0	0	0	0	0	0
A0A0A6YYL2;P0DMM9;P0DMM9-3;P0DMN0	0	0	0	0	0	0	1	0	0	0	0
A0A0A6YYL4;P57737-3	0	0	0	1	0	0	0	0	0	0	0
A0A0B4J1R2;Q9H6R3	0	0	0	0	0	0	0	1	0	0	0
A0A0B4J1R4;P32754	0	0	0	0	0	0	1	0	0	0	0
A0A0B4J1R7;Q96B45	0	0	0	0	0	0	0	0	0	0	0
A0A0B4J1S8;Q9UBF8;Q9UBF8-2;Q9UBF8-3	0	0	0	0	0	0	1	0	0	0	0
A0A0B4J1W0;B9TX62;F5GY88;H0YEG1;O75448;O75448-2	0	1	0	0	0	0	0	0	0	0	0
A0A0B4J1Y2;Q8NDW8;Q8NDW8-3;Q8NDW8-5;Q8NDW8-6;Q8NDW8-7	0	0	0	0	0	0	0	1	0	0	0
A0A0B4J1Z1;C9JAB2;Q16629;Q16629-2;Q16629-3;Q16629-4	0	1	0	0	0	0	0	0	0	0	0
A0A0B4J269	1	0	0	0	0	0	1	0	0	0	0
A0A0B4J291;Q8N8U2	0	0	1	0	0	0	1	0	0	0	0
A0A0B4J294;H3BP13;Q9UL33;Q9UL33-2	0	0	0	0	0	0	1	0	0	0	0
A0A0B4J297;I3L4V0;Q9BRA0;Q9BRA0-2	0	0	0	0	1	0	0	0	0	0	0
A0A0B4J2A0	0	0	0	0	0	0	1	0	0	0	0
A0A0B4J2C2;F8WF49;Q9Y2H0;Q9Y2H0-1;Q9Y2H0-3	0	0	0	0	0	0	1	0	0	0	0
A0A0B4J2C3;J3KPG2;P13693;Q5W0H4	0	0	0	0	0	1	0	0	0	0	0
A0A0B4J2D5;P0DPI2	0	0	0	0	0	0	0	1	0	0	0
A0A0B4J2E5;Q15269	0	1	0	0	0	0	0	0	0	0	0
A0A0B4J2F0	0	0	0	0	0	0	0	1	0	0	0
A0A0B4J2F8;E2QRJ6;F6S314;P52435	0	1	0	0	0	0	0	0	0	0	0
A0A0B4J2G4;Q15345;Q15345-3	1	0	0	0	0	0	1	0	0	0	0
A0A0C3SFZ9;M0QXD1;M0QY09;M0QZE1;M0QZI3;M0R1K4;M0R3E5;O14526;O14526-2;O14526-3	1	0	0	0	0	0	0	0	1	0	0
A0A0C4DFL7;Q16850	0	0	0	0	1	0	0	0	0	0	0
A0A0C4DFL8;F5GX28;O94953	0	1	0	0	0	0	0	0	0	0	0
A0A0C4DFM1;Q92544	0	0	0	0	0	1	0	0	1	0	0
A0A0C4DFM7;Q5TAX3	1	0	0	0	0	0	0	0	0	0	0
A0A0C4DFP6;Q5T4F6;Q9NQ79;Q9NQ79-2;Q9NQ79-3	0	0	0	1	0	0	0	1	0	0	0
A0A0C4DFR1;O75069;O75069-2;O75069-3;O75069-5	0	0	0	0	0	0	0	0	0	0	0
A0A0C4DFU4;Q9HBG7-4	0	0	0	0	0	0	0	0	0	0	0
A0A0C4DFV0;Q9H469	0	0	0	0	0	1	0	0	0	0	0
A0A0C4DFW4;Q5JUR7	0	1	0	0	0	0	0	0	0	0	0
A0A0C4DFX2;A0A286YFA9;A0A2R8Y5V8;A0A2R8YCY2;Q5TBA9	1	0	0	0	0	1	0	0	0	0	0
A0A0C4DFX6;A0A0C4DGG6;Q9UHC9;Q9UHC9-2;Q9UHC9-3;Q9UHC9-4	0	1	1	0	0	0	0	0	0	1	1
A0A0C4DFX9;Q9H3P2	0	1	0	0	0	0	0	0	0	0	0
A0A0C4DFY5;A8MXZ4;J9JIE0;Q9NQ84;Q9NQ84-2	0	0	1	0	1	0	0	0	0	1	0
A0A0C4DFY7;Q6UWW8;Q6UWW8-2	0	0	1	0	0	0	0	0	1	1	1
A0A0C4DFZ2;P15289;P15289-2	0	0	0	1	0	0	0	1	0	0	0
A0A0C4DG02;F8WE91;Q9Y6K1;Q9Y6K1-2	0	1	0	0	0	0	0	0	0	0	0
A0A0C4DG17;C9J9K3;P08865	0	0	0	0	1	0	0	0	0	0	0
A0A0C4DG21;A0A7D9NKC8;E7EP65;E7EW77;E9PEZ7;F8WAL6;Q9NYB9;Q9NYB9-2;Q9NYB9-4	0	0	0	0	0	0	0	0	1	0	1
A0A0C4DG26;Q9NP71;Q9NP71-2;Q9NP71-3;Q9NP71-4;Q9NP71-6	0	1	0	0	0	0	1	0	0	0	0
A0A0C4DG40;Q8NF91;Q8NF91-4	0	0	0	1	0	0	0	0	0	0	0
A0A0C4DG51;Q9NP80;Q9NP80-3	0	0	0	1	0	0	0	1	0	0	0
A0A0C4DG62;F5GYV5;F8WCT1;H7BZV4;Q66PJ3;Q66PJ3-2;Q66PJ3-3;Q66PJ3-4;Q66PJ3-7	0	1	0	0	0	0	0	0	0	0	1
A0A0C4DG80;Q9P2N7;Q9P2N7-2;Q9P2N7-3;Q9P2N7-4;Q9P2N7-5	0	0	0	0	0	0	0	0	0	0	0
A0A0C4DG85;P40394;P40394-2	0	0	0	0	0	0	1	0	0	0	0
A0A0C4DG88;P14859;P14859-2;P14859-3;P14859-4;P14859-5;P14859-6	0	1	0	0	0	0	0	0	0	0	0
A0A0C4DG89;Q7L014	0	1	0	0	0	0	0	0	0	0	0
A0A0C4DG90;A4D0S4;A4D0S4-3	0	1	0	0	0	0	0	0	0	1	1
A0A0C4DG91;A0A2R8Y7V2;C9J9V6;C9JQB1;O75414	0	0	0	0	0	0	0	1	0	0	0
A0A0C4DG95;C9IYJ2;E9PD56;F8WDF7;H7BYG4;Q7Z7A4;Q7Z7A4-2;Q7Z7A4-4;Q7Z7A4-6;W5RWE6	0	1	0	0	0	0	0	0	0	0	1
A0A0C4DGA2;O75521;O75521-2	0	0	0	1	0	0	0	1	0	0	0
A0A0C4DGA6;Q14527;Q14527-2	0	1	0	0	0	0	0	1	0	1	1
A0A0C4DGA7;O94929;O94929-3	0	1	0	0	0	0	0	0	0	1	1
A0A0C4DGB0;Q9UIL1;Q9UIL1-2;Q9UIL1-3	1	0	0	0	0	0	0	0	0	0	0
A0A0C4DGB9	0	0	0	0	0	0	0	1	0	0	0
A0A0C4DGE4;A0A0J9YW33;A0A286YF28;Q13277;Q13277-2;Q13277-3	0	0	0	0	0	0	0	0	0	1	1
A0A0C4DGE7;Q86UK5;Q86UK5-2;Q86UK5-3	1	1	0	0	0	0	0	0	0	0	0
A0A0C4DGF7;Q6UXC1;Q6UXC1-2;Q6UXC1-3	0	0	0	1	0	0	0	1	0	0	0
A0A0C4DGG1;Q9UKS6	0	0	0	0	0	0	0	0	0	1	1
A0A0C4DGG9;A0A2R8Y212;A0A2R8Y425;A0A2R8Y521;A0A2R8Y5J0;A0A2R8YFK9;A0A2U3TZM0;F5GWX5;Q14839;Q14839-2	0	1	0	0	0	0	0	0	0	0	0
A0A0C4DGH0;Q5ZPR3;Q5ZPR3-3;Q5ZPR3-4	0	0	0	0	1	0	0	0	0	1	1
A0A0C4DGH6;A0JNW5	1	1	0	0	0	0	0	0	0	0	0
A0A0C4DGI4	0	0	0	0	0	0	0	1	1	0	0
A0A0C4DGM9;B7Z896;F5H3M2;Q9BVG8;Q9BVG8-2;Q9BVG8-4;Q9BVG8-5;Q9BVG8-6	0	1	0	0	0	0	0	1	0	0	0
A0A0C4DGN6;J3QRU8;Q9Y2X7;Q9Y2X7-3	0	0	0	1	0	0	0	0	0	0	0
A0A0C4DGP0;E7EU35;Q9UKF7-2	0	0	1	0	0	0	1	0	0	0	0
A0A0C4DGQ4;Q86W25	1	0	0	0	0	0	0	0	0	0	0
A0A0C4DGQ5;P04632	0	0	0	0	0	0	1	0	0	0	0
A0A0C4DGQ8;Q6IAN0	0	0	0	0	1	0	0	0	0	0	0
A0A0C4DGR2;M0QY25;M0QYH7;M0QYQ4;M0QZQ2;Q71SY5;Q71SY5-4;Q71SY5-5;Q71SY5-6;Q86YD1;Q86YD1-2	0	1	0	0	0	0	0	0	0	0	0
A0A0C4DGS1;P39656;P39656-3	0	0	0	0	0	0	0	1	0	0	0
A0A0C4DGV4;E9PLX3;O43504;R4GMU8	0	0	0	0	1	0	0	0	0	0	0
A0A0C4DGZ4;Q9Y5U4	0	0	0	0	0	0	0	0	1	0	0
A0A0C4DH01;Q9NVU0;Q9NVU0-2;Q9NVU0-3;Q9NVU0-4;Q9NVU0-5	1	1	0	0	0	1	0	0	0	0	0
A0A0C4DH13;E5RG96;J3KQJ9;Q8N2E2	0	0	0	0	0	0	0	0	0	0	0
A0A0C4DH16;B8ZZS0;H7BXT7;Q9NYM9	0	0	0	0	0	0	0	0	1	0	0
A0A0C4DH36	0	0	0	0	0	1	0	0	1	1	0
A0A0D2X7Z3;Q49AN0;Q49AN0-2	0	0	1	0	0	0	0	0	0	0	0
A0A0D9SEI0;Q9P0P8	0	0	0	0	0	0	0	1	0	0	0
A0A0D9SEI3;A0A0D9SEN2;A0A0D9SER5;P21127;P21127-2;P21127-3;P21127-8	0	1	0	0	0	0	0	0	0	0	0
A0A0D9SEJ5;F5GY05;Q96EK7;Q96EK7-2	0	0	0	0	0	0	0	1	1	0	0
A0A0D9SEK1	0	0	0	0	0	0	0	0	0	0	0
A0A0D9SEN7;A0A2R8Y7Z3;I3L0L0;Q13950;Q13950-2;Q13950-3	0	0	0	0	0	0	0	0	0	1	0
A0A0D9SES8;H0YKN8;H0YKT5;H0YL70;H0YNI7;H0YNT2;Q04724;Q04726;Q04726-2;Q04726-3;Q04726-4;Q04726-5;Q04726-6;Q04726-7;Q04727;Q04727-2;Q04727-3;Q04727-4	1	0	0	0	0	0	0	0	1	0	0
A0A0D9SET2;A0A0D9SFD0;A0A0D9SGI5;A0A0R4J2G5;A0A1B0GTW4;A0A1B0GV32;D6R942;D6RB91;D6RC63;D6RCM6;D6RG14;D6RG21;D6RJA7;D6RJG6;D8L7E9;H0YM62;Q02078;Q02078-2;Q02078-3;Q02078-4;Q02078-5;Q02078-6;Q05BX2;Q06413;Q06413-2;Q06413-3;Q06413-4;Q06413-5;Q06413-6;Q14814;Q14814-2;Q14814-3;Q14814-4;Q14814-5;Q14814-6	0	1	0	0	0	0	0	0	0	0	0
A0A0D9SEU5;Q6VN20;Q6VN20-3;R4GMX8	1	0	0	0	0	0	0	0	0	0	0
A0A0D9SEX5;Q9H6R6;Q9H6R6-2	0	0	1	0	0	0	0	0	0	1	1
A0A0D9SEY1;E7EN19;E7ENQ1;G3XAA2;G5E948;H7C360;O95819;O95819-2;O95819-3;O95819-4;O95819-5;O95819-6	0	0	0	0	0	0	0	0	0	0	0
A0A0D9SF44;A0A0R4J2E2;Q9Y3T6;Q9Y3T6-3	1	0	0	0	0	0	0	0	0	0	0
A0A0D9SF53;A0A0D9SFB3;A0A0D9SG12;A0A2R8Y4A4;A0A2R8Y645;A0A2R8YCW1;A0A2R8YF78;A0A2R8YFR4;A0A2R8YFS5;A0A2U3TZJ9;O00571	0	0	0	0	0	0	0	0	0	0	0
A0A0D9SF60;Q99569;Q99569-2	0	1	0	0	0	0	0	0	0	0	1
A0A0D9SF63;Q9BZK7	1	1	0	0	0	0	0	0	0	0	0
A0A0D9SFB1	0	0	1	0	0	0	0	0	1	0	1
A0A0D9SFB5;P08319;P08319-2	0	0	0	0	0	0	1	0	0	0	0
A0A0D9SFE1;Q9H936	0	0	0	0	0	0	0	1	0	0	0
A0A0D9SFG6;O43739;O43739-2;Q15438;Q15438-2;Q15438-3;Q99418;Q99418-2	0	1	0	0	0	0	1	0	0	0	0
A0A0D9SFJ2;A0A1B0GWF1;A0A2R8Y5Y4;A0A2R8Y6P1;Q6ZU35	0	0	0	0	0	0	0	0	0	0	0
A0A0D9SFK2;Q92614;Q92614-3;Q92614-4	0	1	0	0	0	0	0	0	0	0	0
A0A0D9SFR6;Q16760;Q16760-2;Q86XP1;Q86XP1-2;Q86XP1-3;Q86XP1-5	0	0	1	0	0	1	0	0	0	0	0
A0A0D9SFT8	0	0	0	0	0	1	0	0	1	0	0
A0A0D9SG71;P49459;P49459-3	1	0	0	0	0	0	0	0	0	0	0
A0A0D9SG72;A0A1B0GTP9;A0A1B0GVQ5;A0A1B0GWF2;A0A2R8Y5D4;P61764;P61764-2	0	0	0	0	1	0	0	0	0	0	1
A0A0D9SG79;Q9NZ09;Q9NZ09-3;Q9NZ09-4	0	0	0	0	0	0	0	0	0	0	0
A0A0D9SG96;Q9ULB1-3	1	0	0	0	0	1	0	0	0	0	0
A0A0D9SGD6;B0QZE2;B7Z2J6;E7ENI9;E7EV75;Q15326;Q15326-2;Q15326-5	0	1	0	0	0	0	0	0	1	0	0
A0A0D9SGF6;Q13813;Q13813-2	0	1	0	1	0	0	0	0	0	0	0
A0A0D9SGH0;A0A1B0GV11;Q92581;Q92581-2;Q92581-3	0	0	0	0	0	1	0	0	1	0	0
A0A0D9SGJ6;C9JFZ1;J3KPK1;J3KQV8;O43426;O43426-2;O43426-4	0	0	0	0	0	0	0	0	0	0	0
A0A0G2JH30;A0A0G2JPX0;A0A2R8YFP9;A6NK88;P49918;P49918-2	0	0	0	0	0	0	1	0	0	0	0
A0A0G2JH68;O60610	0	0	0	0	0	0	1	0	0	0	0
A0A0G2JHC2;Q6NYC8	0	0	0	0	0	0	0	0	0	1	1
A0A0G2JHL0;A0A0G2JK44;A0A140T9E9;A0A140T9F7;A0A140T9V2;H0Y6K2;P25440;P25440-2;P25440-3;U3KQA6	0	1	0	0	0	0	0	0	0	0	0
A0A0G2JI43;A0A0G2JIJ2;A0A140T926;A0A140T9C9;A0A140T9I2;A0A140T9R0;A0A140T9R2;A0A140T9T8;A0A140T9U6;F6UB75;P28068	1	0	0	0	0	0	0	0	0	0	0
A0A0G2JIR1;A0A0G2JIS2;A0A0G2JK64;A0A0G2JRN8;A0A0G2JRR0;A2ABF8;A2ABF9;Q96KQ7;Q96KQ7-2	0	1	0	0	0	0	0	0	0	0	0
A0A0G2JIW1;P0DMV8;P0DMV9	0	0	0	0	0	0	1	0	0	0	0
A0A0G2JJD3;O95870	0	0	0	0	1	0	0	0	0	0	0
A0A0G2JJP1;Q9C019	0	0	0	0	1	0	0	0	0	0	0
A0A0G2JL52;A0A140T8Y0;A0A140TA35;B4E0K6;Q5ST30;Q5ST30-4	0	0	0	0	0	0	0	1	0	0	0
A0A0G2JLK7	0	0	0	0	0	0	0	0	0	0	0
A0A0G2JLQ8;A0A0G2JLX3;A0A0G2JNC8;A0A0G2JP37;A0A0G2JPB6;A0A0G2JPQ2;F5H5B1;F5H7Q5;J3KN39;K7EJ90;K7ELX1;Q9NX02;Q9NX02-2;Q9NX02-3;Q9NX02-4	0	0	0	0	0	1	0	0	0	0	0
A0A0G2JM39;A0A0G2JN91;A0A0G2JNH1;M0QYD1	0	0	0	0	0	0	0	1	0	0	0
A0A0G2JM63;A0A0G2JNK3;A0A0G2JPH3;Q8WX94-2;Q8WX94-3	0	0	0	0	0	0	0	0	0	0	0
A0A0G2JM70;Q9NV79;Q9NV79-2;Q9NV79-3;V9GZ41	0	0	1	0	0	0	0	0	0	0	0
A0A0G2JMD2;A0A2R9YJI8	0	0	0	0	1	0	0	0	1	0	0
A0A0G2JMW3;A0A0G2JP44;Q9HBB8;Q9HBB8-2;Q9HBB8-4	0	0	0	0	0	0	0	0	0	0	1
A0A0G2JMX7;A0A0G2JPD5;A0A0G2JQJ7;A0A0G2JS76;P10636;P10636-6;P10636-7;P10636-8;P10636-9	0	0	0	0	0	0	0	0	0	0	0
A0A0G2JMZ6;O60282	0	0	1	0	0	0	0	0	1	0	0
A0A0G2JMZ8;Q16625	0	0	0	0	0	0	0	0	0	0	1
A0A0G2JN23;A0A0G2JQ38	0	0	0	0	0	0	0	0	0	1	1
A0A0G2JN42;A0A0G2JNJ8;Q6W4X9	0	1	0	0	0	0	0	0	0	0	0
A0A0G2JN53	0	0	0	0	0	0	0	1	0	0	0
A0A0G2JN84;P59817	0	0	1	0	0	0	1	0	0	0	0
A0A0G2JNW7;Q9Y666	0	0	0	0	1	0	0	0	0	1	1
A0A0G2JNZ2;A0A669KB89;Q14160	0	0	0	1	0	0	0	0	0	0	1
A0A0G2JPC8;B4DTC2;E7EPX8;E7ER82;Q8TC27	1	0	0	0	0	1	0	0	1	0	0
A0A0G2JPZ6;A0A0J9YWU2;Q9H3Q3	0	0	0	0	1	0	0	0	0	1	1
A0A0G2JQ41;A0A1C7CYZ0;B7Z683;Q12979;Q12979-2;Q12979-4	0	0	1	0	0	0	1	0	0	0	0
A0A0G2JQC6;A0A0G2JQK9;A0A0G2JRT1;E7EWN1;Q99102-3	0	0	0	0	0	0	0	0	0	1	0
A0A0G2JQT1;A0A0G2JR96	0	0	0	0	0	0	0	0	1	0	1
A0A0G2JRG1	0	0	0	0	0	0	0	0	0	0	0
A0A0G2JS52;Q01538;Q01538-2	0	0	1	0	0	0	0	0	1	0	0
A0A0J9YVP6;Q9UHX1-2	0	1	0	0	0	0	0	0	0	0	0
A0A0J9YVW4	0	0	1	0	0	0	0	0	0	0	0
A0A0J9YW18;F6RP06;Q12983	0	0	0	0	0	0	0	1	0	0	0
A0A0J9YW63	0	0	1	0	0	0	0	0	0	1	1
A0A0J9YW64;A6NIW2;Q5JSL3	0	0	0	1	0	0	0	1	0	0	1
A0A0J9YWD2;A0A0J9YX19;A0A0J9YXY6;A0A0J9YYK8;A0A1B0GTJ5;A0A1B0GU79;A0A1B0GUR8;A0A1B0GVR1;Q9UBY8	0	0	0	0	0	0	0	0	1	0	0
A0A0J9YWD5;A0A0J9YX88;A0A0J9YYB5;B7ZM65;E9PJ24;F8WEF5;Q9P1Y6;Q9P1Y6-2;Q9P1Y6-3	0	1	0	0	0	0	0	0	0	0	0
A0A0J9YWD6;O75398-5	0	0	1	0	0	0	0	0	1	0	0
A0A0J9YWE1;A0A0J9YWN0	0	0	0	0	0	0	0	1	0	0	0
A0A0J9YWL0;Q9Y4K1	0	1	0	0	0	0	0	0	0	0	0
A0A0J9YWR7;A0A0J9YXE4;Q8N2F6;Q8N2F6-2;Q8N2F6-3;Q8N2F6-4	0	0	0	0	0	0	0	1	0	0	0
A0A0J9YWV4;O75154;O75154-2;O75154-3;X6RFI8	0	0	0	0	0	0	0	0	1	0	0
A0A0J9YX34;A0A6Q8PEY7;A0A6Q8PF18;A0A6Q8PF63;A0A6Q8PF74;A0A6Q8PFB0;A0A6Q8PFI4;A0A6Q8PFM2;A0A6Q8PFS5;A0A6Q8PFV0;A0A6Q8PFX3;A0A6Q8PG16;A0A6Q8PGE9;A0A6Q8PGG4;A0A6Q8PGL5;A0A6Q8PH06;A0A6Q8PHE9;A0A6Q8PHG4;A0A6Q8PHP4;A0A6Q8PHR6;C9J084;Q9C040;Q9C040-2	0	0	0	0	0	1	0	0	0	1	0
A0A0J9YX62;C9J2C4;O75190;O75190-2;O75190-3	0	1	0	0	0	0	0	0	0	0	0
A0A0J9YX66;A0A0J9YXJ0;A0A1B0GU44;A0A1B0GUN8;E9PC62;O95319;O95319-2;O95319-3;O95319-4;O95319-5;Q5VZZ6;V9GYD9	0	0	0	0	0	0	0	0	1	0	0
A0A0J9YXF2;Q15165;Q15165-1	0	0	0	0	1	0	0	0	0	0	0
A0A0J9YXM6;Q562E7	1	0	0	0	0	0	0	0	0	0	0
A0A0J9YXN7	0	0	1	0	0	0	0	0	0	0	0
A0A0J9YXT0;H7C5H6;Q9H0F7;Q9H0F7-2	1	0	0	0	0	0	1	0	0	0	0
A0A0J9YY17;A0A1C7CYW8;A0A669KB38;Q8IVF4	0	0	0	0	0	0	0	0	0	1	0
A0A0J9YY72;A0A1W2PQQ1;Q5HYW2	0	1	1	0	0	0	0	0	0	0	0
A0A0J9YYF0	0	1	0	0	0	0	0	0	0	0	0
A0A0J9YYF7;Q86T65;Q86T65-4	0	1	0	0	0	0	0	1	0	0	1
A0A0K0K1A5	1	0	0	0	0	1	0	0	0	0	0
A0A0R4J2E8;D6REM6;P43243	0	1	0	0	0	0	0	0	0	0	0
A0A0R4J2F3;P0DPB6	1	1	0	0	0	0	0	0	0	0	0
A0A0R4J2F6;Q12894;Q12894-2	0	1	0	0	1	0	0	0	0	0	0
A0A0S2Z4L3;A0A3B3ISJ1;G5E9F8;P07225	0	0	0	0	1	0	0	0	0	0	1
A0A0S2Z4L7;O60603	0	0	0	0	0	0	0	0	0	1	1
A0A0S2Z4Q7;A0A1W2PQQ6;A0A1W2PQR0;A0A1W2PR45;A0A1W2PRC6;A0A1W2PRD9;A0A1W2PRY1;A0A1X7SBT2;C9JYS9;Q9UNP4;Q9UNP4-2;Q9UNP4-3	0	0	0	0	0	0	0	0	1	0	0
A0A0S2Z5D0;A0A1B0GTU6;H3BUV4;Q9NWW5;Q9NWW5-2	0	0	0	0	1	0	0	0	0	1	1
A0A0U1RQE4;A0A494C1M0;Q5HYK7;Q5HYK7-2;Q5HYK7-3	1	0	0	0	0	1	0	0	0	0	0
A0A0U1RQK7	0	0	0	0	0	0	0	0	0	0	0
A0A0U1RQK9	0	0	0	0	0	0	0	1	0	0	1
A0A0U1RQM0;H0YKX3;H0YMA4;Q15004	0	0	0	0	0	0	0	0	0	0	0
A0A0U1RQQ9;Q6P3W7	0	0	0	0	0	0	0	0	0	0	0
A0A0U1RQS4;A0A0U1RR93;Q9BYB0;Q9BYB0-3	0	0	0	0	0	0	0	0	1	1	1
A0A0U1RQT8;Q8TCZ2;Q8TCZ2-2;Q8TCZ2-3;Q8TCZ2-5	0	0	1	0	0	0	0	0	0	1	1
A0A0U1RQW3;Q8WXE1;Q8WXE1-2	0	0	0	0	0	0	0	0	0	0	0
A0A0U1RQW6;E7EPU2;Q9Y2E4	0	1	0	0	0	0	0	0	0	0	0
A0A0U1RQY4	0	1	0	0	0	0	0	0	0	0	0
A0A0U1RR06;Q9Y484;Q9Y484-2;Q9Y484-3	0	0	1	0	0	0	1	0	0	0	0
A0A0U1RR16;A0A3B3IRZ7;Q8NEY4;Q8NEY4-2	0	1	0	0	0	0	0	0	0	0	0
A0A0U1RR25	0	0	0	0	0	0	0	0	0	1	1
A0A0U1RR27;H3BTW5;Q7Z401;Q7Z401-2	1	0	0	0	0	0	0	0	0	0	0
A0A0U1RR32;A0A0U1RRH7;P0C0S8;P20671;Q96KK5;Q99878;Q9BTM1	0	1	0	0	0	0	0	0	0	0	0
A0A0U1RR76;A6NJ78;A6NJ78-2;A6NJ78-4;P0C7V9	0	0	0	0	0	0	0	1	0	0	0
A0A0U1RRA6;B5MCG9;B5MCU0;H7C0E9;Q9Y2K5	1	0	0	0	0	1	0	0	0	0	0
A0A0U1RRB6;J3QT38;Q9Y2D4;Q9Y2D4-2	0	0	0	0	0	0	0	0	0	0	0
A0A0U1RRB9;F2Z2V1;Q96C11;Q96C11-3	0	0	0	0	0	0	1	0	0	0	0
A0A0U1RRK1;A0A286YF11;F6XEV2;Q9BPX6;Q9BPX6-3	0	0	0	0	0	0	0	1	0	0	0
A0A0U1RRL7	0	1	0	0	0	0	0	1	0	0	1
A0A0U1RRL8;Q8TB22;Q8TB22-2;Q8TB22-3	0	0	0	0	0	0	0	1	0	0	0
A0A126GWB3;P47888	0	0	1	0	0	0	0	0	1	0	0
A0A140LJL2;Q8N350	0	0	0	0	0	1	0	0	1	0	0
A0A140T8Y3;A0A140T902;A0A140T9C0;A0A140TA33;A0A140TA41;A0A140TA52;A0A3B3ISX9;P22105;P22105-1;P22105-4	0	1	0	0	0	0	0	0	0	0	0
A0A140T913;A0A140T933;A0A140T955;A0A140T9I0;A0A140T9X5;A0A1W2PRT9;Q53Z42	0	0	0	0	1	0	0	0	0	1	1
A0A140T951	0	0	0	0	1	0	0	0	0	1	1
A0A140T962;A0A140T9B3;A0A140T9J9;A0A1W2PR11;Q5QT33	0	0	0	0	1	0	0	0	0	0	1
A0A140T9G8;Q0P5T2;Q5SQH8;Q5SQH8-2;Q5SQH8-4	0	1	0	0	0	0	0	1	0	0	1
A0A140T9T7;Q03518	0	0	0	0	1	0	0	0	0	0	0
A0A140TA01;E9PQT8;E9PQZ5;O43189;O43189-2	1	1	0	0	0	0	0	0	0	0	0
A0A140TA09;Q99942	0	0	0	0	0	0	0	0	0	0	0
A0A182DWF2;A0A182DWF3;Q9NNW7;Q9NNW7-2	0	0	0	0	0	0	0	1	0	0	0
A0A182DWH7;P49908	0	0	0	0	0	0	0	0	0	0	0
A0A182DWI4;E9PN30;Q9BQE4	0	0	1	0	0	0	0	0	1	0	0
A0A1B0GTB0;A0A1B0GTU8;A0A1B0GU12;A0A1B0GUT7;A0A1B0GVB9;A0A1B0GVC7;A0A1B0GVW0;A0A1B0GWJ8;A0A1C7CYW4;B7Z413;H7C3E1;O75787;O75787-2	0	0	0	0	0	0	0	0	0	1	1
A0A1B0GTF3;A0A6I8PIT5;A0A6I8PIW1;A0A6I8PLB1;O43301	0	0	1	0	0	0	0	0	1	0	1
A0A1B0GTG2;A0A1B0GW77;P49419;P49419-2	0	0	0	1	0	0	0	1	0	0	0
A0A1B0GTJ7;A0A1B0GWJ0;P30566	0	0	0	0	0	0	1	0	0	0	0
A0A1B0GTJ8;A0A1B0GV63;A0A1B0GVK1;A0A1B0GWJ2;A0A3F2YNW7;A0A6Q8NVI4;H0Y7H8;Q8NFD5;Q8NFD5-2;Q8NFD5-3;Q8NFD5-4	0	1	0	0	0	0	0	0	0	0	0
A0A1B0GTK6	0	0	0	0	0	0	1	0	0	0	0
A0A1B0GTM1;A0A1B0GUM5;E7ETX0;Q8NHX9	0	0	0	0	0	0	0	0	1	0	0
A0A1B0GTM3;A0A1B0GUA4;A0A1B0GUH5;A0A1B0GW68;Q13510;Q13510-2	0	0	0	0	0	0	0	0	0	0	0
A0A1B0GTT2	0	0	0	0	0	0	0	0	1	0	0
A0A1B0GTU3;Q96L93;Q96L93-2;Q96L93-4;Q96L93-5;Q96L93-6	0	0	1	0	0	0	0	0	1	0	0
A0A1B0GTU4	0	0	0	0	0	0	1	0	0	0	0
A0A1B0GTU5;H0Y488;O14497;O14497-2;O14497-3	0	1	0	0	0	0	0	0	0	0	0
A0A1B0GTU7;H0YD36;P54098	0	0	0	0	0	0	0	1	0	0	0
A0A1B0GTV6	0	0	0	0	0	0	0	1	0	0	1
A0A1B0GTW1;A0A2R8YDH4;A0A3B3ITE1;Q9UDY2;Q9UDY2-3;Q9UDY2-7	0	0	0	1	0	0	0	0	0	0	0
A0A1B0GTX1;A0A1C7CYY6;Q6XZF7;Q6XZF7-2	1	1	0	0	0	0	0	0	0	0	0
A0A1B0GUA3;A0A6Q8PGG2;A0A6Q8PH45;A0A6Q8PHL8;Q96EK5	0	0	0	0	0	0	0	0	1	0	0
A0A1B0GUC2;A0A1W2PP33;C9J7I0	0	0	1	0	0	0	0	0	0	1	0
A0A1B0GUF4	0	0	0	0	0	0	0	0	1	0	0
A0A1B0GUG7;A0A1B0GWB7;A0A1B0GWI3;A0A1B0GWK3	1	0	0	0	0	1	0	0	0	0	0
A0A1B0GUI1;Q6GYQ0;Q6GYQ0-2;Q6GYQ0-3;Q6GYQ0-4;Q6GYQ0-5;Q6GYQ0-6;Q6GYQ0-7	0	0	0	0	0	0	0	0	0	1	0
A0A1B0GUL3	0	0	0	0	0	0	0	0	1	0	0
A0A1B0GUL6;E9PEZ5;Q9UPP5;Q9UPP5-2	0	0	1	0	0	0	1	0	0	0	0
A0A1B0GUN5	0	1	0	0	0	0	0	0	0	0	0
A0A1B0GUN9	0	0	0	0	0	0	0	0	0	0	0
A0A1B0GUS7	1	0	0	0	0	1	0	0	0	0	0
A0A1B0GUZ2;P00797;P00797-2	1	0	1	0	0	0	0	0	0	0	0
A0A1B0GUZ7;Q14156;Q14156-2	0	0	0	0	1	0	0	0	0	1	1
A0A1B0GV47;Q7Z4S6;Q7Z4S6-2;Q7Z4S6-4;Q7Z4S6-5;Q7Z4S6-6	0	0	0	0	0	0	0	0	0	0	0
A0A1B0GV48;D6RBC4;Q8NAP3	0	0	1	0	0	0	0	0	0	1	0
A0A1B0GV71;A0A1B0GW34;A0A1B0GWD3;B4DFF3;H3BNK7;H3BR00;O95086;Q13286;Q13286-2;Q13286-3;Q13286-4;Q13286-5;Q13286-7;Q2TA70;Q9UBD8	0	0	0	0	0	0	0	0	0	1	1
A0A1B0GVD5;A0A1B0GVP3;A0A1B0GW44;A0A1B0GWE8;P07339	0	0	0	0	1	0	0	0	0	1	0
A0A1B0GVG4	1	0	0	0	0	0	0	0	1	0	0
A0A1B0GVI7;A0A2R8Y7G1;P35869	0	1	0	0	0	0	0	0	0	0	0
A0A1B0GVL3;Q05086;Q05086-2;Q05086-3	1	0	0	0	0	0	1	0	0	0	0
A0A1B0GVV3;Q5EBL4	0	0	0	0	0	0	1	0	0	0	0
A0A1B0GVV8	1	0	0	0	0	1	0	0	0	0	0
A0A1B0GW05	0	0	0	0	1	0	0	0	0	0	0
A0A1B0GW23;Q03154	0	0	0	0	0	0	1	0	0	0	0
A0A1B0GW38	0	0	0	0	0	0	0	0	0	0	0
A0A1B0GW41;E9PEN0;Q8WYH8;Q8WYH8-2	0	1	0	0	0	0	0	0	0	0	0
A0A1B0GWB2	0	0	0	0	0	0	0	0	0	1	0
A0A1B0GWD8;Q9C093-4	0	0	0	0	0	0	0	0	0	0	0
A0A1B0GWI2;O75503	0	0	0	0	0	0	0	1	0	1	1
A0A1C7CYX0	0	0	0	0	1	0	0	0	0	1	1
A0A1C7CYX9	0	0	0	0	0	0	1	0	0	0	0
A0A1D5RMN4;P23945;P23945-2;P23945-4	0	0	0	0	0	0	0	0	0	0	0
A0A1P0AYU5;Q9BWM7	0	0	0	0	0	0	0	1	0	0	0
A0A1W2PNF0;A0A1W2PNY6;A0A1W2PPE6;A0A1W2PPG9;A0A1W2PPH4;A0A1W2PQ13;A0A1W2PQ60;A0A1W2PQD6;A0A1W2PQH2;A0A1W2PQL8;A0A1W2PR66;A0A1W2PRN3;A0A1W2PRT7;A0A1W2PS45;A0A1W2PS77;A0A1W2PSA9;A0A1W2PSD1;Q9Y2D2;Q9Y2D2-2;Q9Y2D2-3	0	0	0	0	0	0	0	1	0	0	0
A0A1W2PNH8;A0A1W2PNQ8;A0A1W2PNR0;A0A1W2PNW5;A0A1W2PPB6;A0A1W2PPR7;A0A1W2PQA9;A0A1W2PQP4;A0A1W2PQZ1;A0A1W2PS19;K7ELE1;K7EPJ2;O95427	0	0	1	0	0	0	0	0	1	0	0
A0A1W2PNP0;Q969N2;Q969N2-5	0	0	0	0	1	0	0	0	0	0	0
A0A1W2PNR9;Q9Y5U9	0	0	0	0	0	0	0	0	1	1	0
A0A1W2PNT1	1	1	0	0	0	0	0	0	0	0	0
A0A1W2PNU4;A0A286YES2;F8VYC4;P0DJD0;P0DJD1	0	1	0	0	0	0	0	1	0	0	0
A0A1W2PNV4	1	0	0	0	0	0	1	0	0	0	0
A0A1W2PNW1;A0A494C0T4;H0YJH6;P42226;P42226-3	0	0	0	0	0	0	1	0	0	0	0
A0A1W2PNX8;Q9H3U1;Q9H3U1-2	0	0	0	0	0	0	1	0	0	0	0
A0A1W2PNY5;A0A1W2PPP6;A0A1W2PQA7;A0A1W2PQZ6;A0A1W2PR08;A0A1W2PRF0;A0A1W2PRF5;A0A1W2PRJ0;A0A1W2PS93;A0A1X7SBS0;G5E9D4;Q96EB1;Q96EB1-2;Q96EB1-3	1	1	0	0	0	0	0	0	0	0	0
A0A1W2PNZ9;H7BXU7;Q15652;Q15652-3	0	0	0	0	0	1	0	0	0	0	0
A0A1W2PP04;Q5JY83;Q9Y388	0	1	0	0	0	0	0	0	0	0	0
A0A1W2PP11;Q9H300	0	0	0	0	0	0	0	1	0	0	0
A0A1W2PPB5;Q13873;Q13873-2	0	1	1	0	0	0	0	0	0	1	1
A0A1W2PPB7;E9PH70;H0Y8E4;Q9ULH0;Q9ULH0-2;Q9ULH0-4	0	0	0	0	1	0	0	0	0	1	1
A0A1W2PPC6;Q9H3H5;Q9H3H5-2	0	0	0	0	1	0	0	0	0	0	0
A0A1W2PPD8	0	0	0	0	0	0	0	0	1	0	0
A0A1W2PPH1;P23368	0	0	0	0	0	0	0	1	0	0	0
A0A1W2PPH6	0	0	0	0	0	0	0	1	0	0	0
A0A1W2PPI5;Q5JSJ4	0	1	0	0	0	0	0	0	0	1	0
A0A1W2PPJ5;J3QT51;J3QT87;Q96SW2;Q96SW2-2	0	0	0	0	0	0	0	0	0	0	0
A0A1W2PPS1;Q00839;Q00839-2	0	1	0	0	0	0	0	0	0	0	0
A0A1W2PPV0;A0A1W2PQG5;Q9Y5P2;Q9Y5P2-2	0	0	0	0	0	1	0	0	1	1	0
A0A1W2PPZ5;P23193	0	0	0	0	0	0	1	0	0	0	0
A0A1W2PQ75;O15488;O15488-2;O15488-3;O15488-4;O15488-6	0	1	0	0	0	0	0	1	0	0	0
A0A1W2PQD2;Q9UBB4	1	0	0	0	0	0	1	0	0	0	0
A0A1W2PQE7	0	0	0	0	0	0	0	1	0	1	1
A0A1W2PQM2	0	1	1	0	0	0	0	0	0	0	0
A0A1W2PQM3	0	0	0	0	1	0	0	0	0	0	0
A0A1W2PQM5;A0A1W2PR19;A0A1W2PRG0	0	0	0	0	0	0	0	0	0	0	0
A0A1W2PQP6;Q9BWL3;Q9BWL3-2;Q9BWL3-3;Q9BWL3-4;Q9BWL3-5;X6R6F3;X6R6S3	0	1	0	0	0	0	0	0	0	1	1
A0A1W2PQQ5	0	0	0	0	0	0	0	1	0	1	1
A0A1W2PQS6	0	0	0	0	0	0	0	1	0	0	0
A0A1W2PR09;A0A1W2PRL5;A0A1W2PRM0;F5GYH1;Q8NC96	0	0	0	0	0	0	0	0	0	0	0
A0A1W2PR17;F2Z2I2;Q16875;Q16875-2;Q16875-3;Q16875-4;Q5VX20;Q5W015	0	0	0	0	0	0	1	0	0	0	0
A0A1W2PR28;A0A1W2PRJ5;A0A6Q8PFR7;Q5JU85;Q5JU85-3	0	0	0	0	0	1	0	0	1	0	0
A0A1W2PR46;A0A1X7SBR3;P14136;P14136-2;P14136-3	0	1	0	0	0	0	0	0	0	0	1
A0A1W2PRB8	0	1	1	0	0	0	0	0	0	0	1
A0A1W2PRI9;E9PNW5	0	0	1	0	0	0	0	0	1	0	0
A0A1W2PRW4;P53816	0	0	0	0	0	0	1	0	0	0	0
A0A1W2PS05;Q8NEB9	1	0	0	0	0	0	0	0	0	0	0
A0A1W2PS43;Q14108	0	0	0	0	1	0	0	0	0	1	1
A0A1W2PS52	0	0	0	0	0	1	0	1	0	1	0
A0A1W2PS94;A0A2R8Y358;Q9BXT5	1	0	0	0	0	0	0	0	0	0	0
A0A1X7SBT1;Q9H1D0;Q9H1D0-2	0	0	0	0	0	0	0	1	0	0	0
A0A1X7SBY3;H0Y860;Q9P246;Q9P246-2	0	0	1	0	0	0	0	0	1	0	0
A0A1X7SBZ2;A0A5H1ZRQ2;Q92841	0	1	0	0	1	0	0	0	0	0	0
A0A1Y0BRN3;A0A590UJ40	0	0	0	0	0	0	0	0	0	0	0
A0A286YEV4;A0A286YEV9;A0A286YEW8;A0A286YEX1;A0A286YF00;A0A286YF45;A0A286YF51;A0A286YF73;A0A286YFC6;A0A286YFE7;A0A286YFF5;A0A286YFH9;A0A286YFM2;B7Z2B2;E7ERQ4;Q8NHS3	0	0	0	0	0	0	0	0	1	0	0
A0A286YEX4;P08651;P08651-5;P08651-6	0	1	0	0	0	0	0	0	0	0	0
A0A286YF17;A0A286YFD0;P42898;P42898-2;Q5SNW7	0	0	0	0	0	0	1	0	0	0	0
A0A286YF22;O43175	0	0	0	0	0	0	1	0	0	0	0
A0A286YF37;Q9UK22	0	0	0	0	0	1	0	0	0	0	0
A0A286YFA5;Q8NGQ1	0	0	0	0	0	0	0	0	1	0	0
A0A286YFE3;A0A286YFF7;A0A286YFL8;A0A2C9F2P4;P50897;Q5T0S4	0	0	0	0	1	0	0	0	0	1	1
A0A286YFF8;Q7Z3U7;Q7Z3U7-2;Q7Z3U7-5;Q7Z3U7-6	0	0	0	0	0	0	1	0	0	0	0
A0A2Q2TTZ9;P01593;P01594	0	0	1	0	0	0	0	0	0	0	0
A0A2Q3DQE3;Q13555;Q13555-10;Q13555-11;Q13555-2;Q13555-3;Q13555-4;Q13555-5;Q13555-6;Q13555-7;Q13555-8;Q13555-9;Q5SWX3;Q8WU40	0	1	0	0	0	1	0	0	0	0	0
A0A2R8Y2A8	0	0	0	1	0	0	0	0	0	0	0
A0A2R8Y2F6;P42336	0	1	0	0	0	0	0	1	0	0	0
A0A2R8Y3M9	0	0	0	0	1	0	0	0	0	0	0
A0A2R8Y3N3;A0A2R8Y5P7;A0A2R8Y6I1;P49590;P49590-2	0	0	0	0	0	0	0	1	0	0	0
A0A2R8Y3S0;A0A2R8Y511;A0A2R8YCL0;Q96JX3	0	0	0	1	0	0	0	1	0	0	0
A0A2R8Y440;A0A2R8Y4P4;A0A2R8Y7S2;A0A2R8YG32;A0A2R8YGG3;P51532;P51532-2;P51532-3;P51532-4;P51532-5;Q9HBD4	0	1	0	0	0	0	0	0	0	0	0
A0A2R8Y455;A0A2R8Y600;A0A2R8Y620;A0A2R8Y7U2;Q86VX2;Q86VX2-2	0	0	0	0	0	1	0	0	0	0	0
A0A2R8Y471;Q12967;Q12967-2;Q12967-3;Q12967-4;Q12967-5;Q12967-6;Q5T7U6	0	1	0	0	0	0	0	0	1	0	0
A0A2R8Y478;A6NNI4;G8JLH6;P21926	0	0	1	0	0	0	0	0	0	0	0
A0A2R8Y484;Q08722;Q08722-2;Q08722-3;Q08722-4	0	0	1	0	0	0	0	0	0	0	0
A0A2R8Y491;E7EWD9;O95718;O95718-1;O95718-2	0	0	0	0	0	0	1	0	0	0	0
A0A2R8Y4C2;A0A2R8Y596;A0A2R8Y5C9;A0A2R8Y5E4;A0A2R8Y6M6;A0A2R8Y8C4;A0A2R8YFK2;A0A2R8YFS8;P56945;P56945-2;P56945-3;P56945-4;P56945-5;P56945-6;P56945-7;P56945-8	0	0	0	0	0	0	1	0	0	0	0
A0A2R8Y4F5	1	0	0	0	0	0	0	0	1	0	0
A0A2R8Y4I8;A0A2R8Y7K2;A0A2U3TZR0;Q9UBP0;Q9UBP0-2;Q9UBP0-3;Q9UBP0-4	0	0	0	0	0	0	0	0	0	0	0
A0A2R8Y4K2;Q9Y2S2	0	0	0	0	0	0	1	0	0	0	0
A0A2R8Y4M1;A0A2R8Y615;A0A2R8YGW2;A0A5F9ZHK1;Q9NZA1;Q9NZA1-2;Q9NZA1-3	0	0	0	0	0	0	0	0	0	1	1
A0A2R8Y4T1	0	0	0	1	0	0	0	0	0	0	0
A0A2R8Y4U1;A0A2R8YDF7;O75164	0	1	0	0	0	0	0	0	0	0	0
A0A2R8Y4U4	0	0	1	0	0	0	0	0	1	1	1
A0A2R8Y4V0;A0A2R8Y4Z4;A0A2R8Y5D8;A0A2R8Y6Q0;A0A2R8YDG0;Q09428;Q09428-2	0	0	0	0	0	0	0	1	0	0	0
A0A2R8Y4W0	0	0	0	0	0	0	0	1	0	1	1
A0A2R8Y4W1;A0A2R8Y860;A0A2R8YD46;A0A2R8YFE3;A0A2U3TZS7;P43004;P43004-2	0	0	0	0	1	0	0	0	0	1	1
A0A2R8Y4W2;A0A2R8YE63;Q12929	0	0	0	0	0	0	1	0	0	0	0
A0A2R8Y4Y7;A0A2R8YFW4;Q9UQ90	0	0	0	0	0	0	0	1	0	0	0
A0A2R8Y4Z0;A0A2R8Y7W5;A0A2R8YF61;Q14004;Q14004-2	0	0	0	0	0	0	1	0	0	0	0
A0A2R8Y4Z8	0	1	0	0	0	1	0	0	0	0	0
A0A2R8Y524;A0A2R8YEC9;E9PFW2;O00462	0	0	0	1	0	0	0	0	0	0	0
A0A2R8Y543;A0A2R8Y5A3;A0A2R8Y804;A0A2R8YCH5;B4DGU4;P35222	0	0	0	0	0	0	0	0	0	1	1
A0A2R8Y544;Q9BR61	1	0	0	0	0	0	1	0	0	0	0
A0A2R8Y549;Q8NI35;Q8NI35-2;Q8NI35-3;Q8NI35-4	0	0	0	1	0	0	0	0	0	0	0
A0A2R8Y566;Q9P260-2	0	0	0	0	0	0	1	0	0	0	0
A0A2R8Y595;A0A2R8YFL0;P49711	0	1	0	0	0	0	0	0	0	0	0
A0A2R8Y5A0;A0A2R8YD58;E7EU96;P68400	0	1	0	0	0	0	0	0	0	0	0
A0A2R8Y5D3;A0A2R8YEZ4;O15160;O15160-2	1	1	0	0	0	0	0	0	0	0	0
A0A2R8Y5F1;A0A2R8Y7C8;A0A2R8Y7X5;A0A2R8YDR3;A0A2R8YDZ2;A0A2R8YGD6;A0A2R8YGU4;H3BMQ0;P49815;P49815-2;P49815-3;P49815-4;P49815-5;P49815-6;P49815-7;X5D2U8	0	1	0	0	0	0	0	0	0	0	0
A0A2R8Y5J4;Q9BYG8	0	0	0	0	0	0	0	0	1	0	0
A0A2R8Y5K2;Q96LT7	1	1	0	0	0	0	0	0	0	0	0
A0A2R8Y5N2;A0A2R8Y5S3;A0A2R8YFV7;Q92574;Q92574-2	0	1	0	0	0	0	0	1	0	0	0
A0A2R8Y5P9;Q8TF72	0	0	0	0	0	0	0	0	0	0	0
A0A2R8Y5Q8;A0A2R8YHI9;Q15813;Q15813-2	0	1	0	0	0	0	0	1	0	0	0
A0A2R8Y5Y7;D6RAN4;P32969	0	0	0	0	1	0	0	1	0	0	0
A0A2R8Y605	0	0	0	0	0	0	0	0	0	0	0
A0A2R8Y635;A0A2R8YDN7;Q9H7F0;Q9H7F0-2	0	1	1	0	0	0	0	0	0	1	1
A0A2R8Y640	0	0	0	0	0	1	0	0	0	0	0
A0A2R8Y648	0	0	0	0	0	0	1	0	0	0	0
A0A2R8Y653;Q9BZX2	0	1	0	0	0	0	0	0	0	0	0
A0A2R8Y661;A0A2R8YGD3;Q9Y4G8	0	0	0	0	0	0	0	0	0	0	0
A0A2R8Y6D0	0	0	0	1	0	0	0	0	0	1	1
A0A2R8Y6I6;A0A2R8Y6L5;A0A2R8YDF3;Q13627;Q13627-2;Q13627-3;Q13627-4;Q13627-5	1	0	0	0	0	0	0	0	0	0	0
A0A2R8Y6P2;A0A2R8YDC4;A6NFE3;C9J654;J3KR48;J3KR52	0	0	0	0	0	0	0	0	1	0	0
A0A2R8Y6W8;P19447	0	1	0	0	0	0	0	0	0	0	1
A0A2R8Y6Y7;A0A2R8YDQ9;Q9P2R7;Q9P2R7-2	0	0	0	0	0	0	0	1	0	0	0
A0A2R8Y783	0	0	1	0	0	0	0	0	0	1	1
A0A2R8Y7B4	1	0	0	0	0	0	0	0	1	0	0
A0A2R8Y7D5	0	0	0	0	0	0	0	0	1	1	0
A0A2R8Y7E6;A0A5F9ZHX3;A0A5F9ZI57	0	0	0	0	0	0	0	0	1	0	0
A0A2R8Y7I9;A0A2R8Y855;A0A2U3TZQ7;B4DGM3;J3QKS7;Q969G3;Q969G3-2;Q969G3-4;Q969G3-5	0	1	0	0	0	0	0	0	0	0	0
A0A2R8Y7P6;A0A5F9ZHW5;F8VQP2;Q99700;Q99700-4;V9GY86	0	0	0	0	0	0	0	0	0	0	0
A0A2R8Y7Q1;E7ETD6;E9PE19;F5GXF5;Q12830;Q12830-2;Q12830-4	0	1	0	0	0	0	0	0	0	0	0
A0A2R8Y7R4;B2RUZ4;H3BS66	0	0	0	0	0	1	0	0	0	0	0
A0A2R8Y7T6;A0A3B3IRZ4;Q6DN90;Q6DN90-3	0	0	0	0	0	0	0	0	0	0	0
A0A2R8Y7U0;H0Y770;O75140;O75140-1;O75140-4;O75140-9	0	0	0	0	0	0	0	0	0	0	0
A0A2R8Y7V5;H0Y850;P38398;P38398-4;P38398-7;P38398-8;Q5YLB2	0	0	0	0	0	0	0	0	0	0	0
A0A2R8Y7X9;P69891;P69892	0	1	0	0	0	0	0	0	0	0	1
A0A2R8Y7Y4;Q8N8A2;Q8N8A2-2;Q8N8A2-4	0	0	0	0	0	0	1	0	0	0	0
A0A2R8Y811;P62263	0	0	0	0	1	0	0	1	0	0	0
A0A2R8Y840;Q9HCK8;Q9HCK8-2	0	1	0	0	0	0	0	0	0	0	0
A0A2R8Y849;A0A2R8Y8A0;A0A2R8YD14;E7ETK0;P62847;P62847-2;P62847-3;P62847-4	0	0	0	0	0	0	0	1	0	0	0
A0A2R8Y851;P62273;P62273-2	0	0	0	0	0	0	0	1	0	0	0
A0A2R8Y852;A0A2R8YDI1;P39880;P39880-2;P39880-3;P39880-4;P39880-5;P39880-6	0	0	0	0	0	1	0	0	1	1	0
A0A2R8Y880;Q7Z6E9;Q7Z6E9-2	0	1	0	0	0	0	0	0	0	0	0
A0A2R8Y8E0;A0A2U3TZI2;H7C560;P15056	0	0	0	0	0	0	1	0	0	0	0
A0A2R8YCJ8;Q5T2H3;Q9NVV5;Q9NVV5-1;Q9NVV5-3	0	0	0	0	0	0	0	0	0	0	0
A0A2R8YCL1;Q13322;Q13322-3;Q13322-4	0	0	0	0	0	0	1	0	0	0	0
A0A2R8YCS7;Q9Y3Z3	0	0	0	0	0	0	0	0	0	0	0
A0A2R8YCV2;Q8NCS4	0	0	0	0	0	0	0	0	0	0	0
A0A2R8YD30;P11171;P11171-2;P11171-3;P11171-4;Q4VB86	0	0	0	1	0	0	0	0	0	0	0
A0A2R8YD49;A0A2R8YDU7;A0A2R8YEX0;Q9H1P3;Q9H1P3-2	0	0	1	0	0	0	0	0	1	0	1
A0A2R8YD63;Q92547	1	0	0	0	0	0	0	0	0	0	0
A0A2R8YD85;Q96BY6;Q96BY6-3	0	0	0	0	0	0	0	0	0	1	1
A0A2R8YDB8;H7BXF5;Q9H0E3;Q9H0E3-3	0	1	0	0	0	0	0	0	0	0	0
A0A2R8YDD5;P30531	0	0	0	0	0	0	0	0	0	0	1
A0A2R8YDI5;O94823;O94823-2;O94823-3	0	0	0	0	0	0	0	1	0	0	1
A0A2R8YDL0;O75443	0	0	0	0	0	0	0	0	0	0	0
A0A2R8YDQ0;Q9H267	1	0	0	0	0	0	0	0	0	0	0
A0A2R8YDR8;Q9BZD2;Q9BZD2-2	0	0	1	0	0	0	0	1	1	0	0
A0A2R8YDT1;P15104	1	0	0	0	0	0	1	0	0	0	0
A0A2R8YE10;Q9NRW7	0	0	0	0	0	1	0	0	0	0	0
A0A2R8YE69;P0CG41;Q8IX94	0	0	0	0	0	0	0	0	1	0	0
A0A2R8YE77;A0A2U3TZM1;O14936;O14936-3	0	0	0	1	0	0	0	0	0	0	1
A0A2R8YEA1;B5MCJ9;O15016;O15016-2	0	0	0	0	0	0	0	0	1	0	0
A0A2R8YEH1	1	0	1	0	0	0	0	0	0	0	0
A0A2R8YEI5;P52757;P52757-9	1	0	0	0	0	0	0	0	0	0	0
A0A2R8YEL6	0	0	0	0	0	0	0	0	0	0	0
A0A2R8YEM2;D6RG18;D6RHI7;P51946	0	1	0	0	0	0	0	0	0	0	0
A0A2R8YEM9;O15050	1	0	0	0	0	0	1	0	0	0	0
A0A2R8YEZ0;B7WP89;Q0P651;Q0P651-2;Q0P651-3;Q0P651-4	0	0	0	1	0	0	0	1	0	0	0
A0A2R8YF49	0	1	0	0	0	0	0	0	0	0	0
A0A2R8YF72;A0A3B3IRF0;A0A3B3IRT9;A0A3B3IRX5;A0A3B3ISI4;A0A3B3ISW5;A0A3B3ITJ8;A0A3B3ITL3;A0A3B3ITS6;A0A3B3IUE2;H7BYU4;Q9UL68;Q9UL68-4	0	0	0	1	0	0	0	1	0	1	0
A0A2R8YFG2;Q96T66	0	0	0	0	0	0	0	1	0	0	0
A0A2R8YFH5;Q15437	1	0	0	0	0	1	0	0	0	0	0
A0A2R8YFN3;A1Z1Q3;A1Z1Q3-1	0	0	0	0	0	0	1	0	0	0	0
A0A2R8YFN7	0	0	0	0	0	0	0	0	1	0	0
A0A2R8YFW3;O60907;O60907-2	0	1	0	0	0	0	1	0	0	0	0
A0A2R8YG42;B1ALK7;Q14155-1;Q14155-5	1	0	0	0	0	1	0	0	0	0	0
A0A2R8YGH5;H7C1E4;P61966	0	0	0	0	0	1	0	0	1	0	0
A0A2R8YGW0;P51795;P51795-1	0	0	0	0	0	0	0	0	1	0	0
A0A2R8YHG5;Q9BZV2	0	0	0	0	0	0	0	0	0	1	1
A0A2U3TZH3;Q05639	0	0	0	0	0	0	0	0	0	0	0
A0A2U3TZK7	0	1	0	0	0	0	0	1	0	0	0
A0A2U3TZL5;E9PNW4;P13987;P13987-2	0	0	0	0	0	0	0	0	0	0	1
A0A2U3TZT9	0	0	1	0	0	0	0	0	1	1	0
A0A2U3TZU2;P06744	0	0	0	0	0	0	1	0	0	0	0
A0A2U3TZV8;Q4KWH8;Q4KWH8-2;Q4KWH8-3;Q4KWH8-4	0	0	0	0	0	0	0	0	1	0	1
A0A2Y9D025;P56556;R4GN43	0	0	0	0	0	0	0	1	0	0	0
A0A384DVU0;Q8IY17;Q8IY17-2;Q8IY17-3	0	0	0	0	1	0	0	0	0	0	1
A0A3B3IRE4;Q8TCE6;Q8TCE6-2	0	0	0	0	0	1	0	0	1	0	0
A0A3B3IRI9;A0A3B3IRJ3;A0A3B3IRV1;A0A3B3IRZ0;A0A3B3IS37;A0A3B3IS68;A0A3B3ISJ4;A0A3B3IT04;A0A3B3IT30;A0A3B3ITZ3;A0A3B3IU52;A6NFW1;A6NGJ7;Q9BY41;Q9BY41-4	0	0	0	0	0	0	1	0	0	0	0
A0A3B3IRJ9;Q9Y2H2	0	0	1	0	0	0	0	0	0	0	0
A0A3B3IRK5;Q9H2D1	0	1	0	0	0	0	0	1	0	0	1
A0A3B3IRL2;O75629	0	0	0	0	0	0	0	0	0	1	0
A0A3B3IRL5;C9J381;P20839;P20839-2;P20839-3;P20839-4;P20839-5;P20839-6;P20839-7	1	0	0	0	0	0	0	0	0	0	0
A0A3B3IRM7	0	0	0	0	0	0	0	0	1	0	0
A0A3B3IRN8;A0A3B3ITX0;P24311	0	0	0	0	0	0	0	1	0	0	0
A0A3B3IRP9	0	0	1	0	0	0	0	0	1	1	0
A0A3B3IRR1;A0A3F2YNY7;P08397;P08397-2	0	0	0	0	0	0	1	0	0	0	0
A0A3B3IRS4;A0A3B3IRX3;A0A3B3IS46;H0YHC1;Q71F56	0	0	1	0	0	0	0	0	1	0	0
A0A3B3IRT8;C9IZQ1;C9J3L8;C9J5W0;E9PAL7;P43307	0	0	0	0	0	0	0	1	0	0	0
A0A3B3IRU6;A0A3B3ISL2;Q9GZU2;Q9GZU2-2;Q9GZU2-4	0	0	0	0	0	0	0	0	1	0	0
A0A3B3IRY8	0	0	1	0	0	0	0	1	0	0	0
A0A3B3IRZ5;Q8IYE1	0	0	0	0	0	0	0	1	0	0	0
A0A3B3IS06;E7ETY2;Q13428-3;Q13428-7;Q13428-8	0	1	0	0	0	0	0	0	0	0	0
A0A3B3IS13	0	0	0	0	0	0	0	0	1	0	0
A0A3B3IS24;C9JIR6;O75688;O75688-2;O75688-4	0	0	0	0	0	0	1	0	0	0	0
A0A3B3IS40;A0A3B3ISE6;A0A3B3IT25;A0A3B3ITA8;A0A3B3ITA9;A0A3B3ITE7;A0A3B3ITJ7;B3KV94;Q9UGL1;Q9UGL1-2	0	0	1	0	0	0	0	0	0	0	0
A0A3B3IS62;A0A3B3ITD6;A0A3B3ITI5;Q9Y672;S4R350	0	0	0	0	0	0	0	1	0	1	1
A0A3B3IS71;P06400	0	1	0	0	0	0	0	0	0	0	0
A0A3B3IS75;K7EIP0;K7EJD9;K7ESF2;P13686	0	0	0	0	0	0	0	0	0	0	0
A0A3B3ISF0;Q659C4;Q659C4-2	0	0	0	0	1	0	0	0	0	0	0
A0A3B3ISF9;P42892;P42892-2;P42892-3;P42892-4	0	0	0	0	0	1	0	0	0	0	0
A0A3B3ISG5;P14735	0	0	0	0	0	0	1	0	0	0	0
A0A3B3ISG8	0	0	0	0	0	0	0	1	0	0	0
A0A3B3ISH6;Q86U38;Q86U38-2	0	1	0	0	0	0	0	0	0	1	0
A0A3B3ISJ2;Q96KQ4	0	1	0	1	0	0	0	0	0	0	0
A0A3B3ISK7;Q6PI48	0	0	0	0	0	0	0	1	0	0	0
A0A3B3ISP1;A0A3B3ITU5;Q92625;Q92625-2	1	0	0	0	0	0	0	0	0	0	0
A0A3B3ISQ4;Q9H6S3	0	0	0	0	0	0	1	0	0	0	0
A0A3B3ISR2;B4DPQ0;P00736	0	0	1	0	0	0	0	0	0	0	0
A0A3B3ISR7;E9PIF2;Q13206	0	1	0	0	0	0	0	0	0	0	1
A0A3B3ISS6	0	1	0	0	0	0	0	0	0	0	1
A0A3B3IST1;B5MD23;O75954	0	0	0	0	0	0	0	1	0	1	1
A0A3B3ISU0;Q02487	0	1	0	0	0	0	0	0	0	1	1
A0A3B3ISV3;P02462	0	1	0	0	0	0	0	1	0	0	0
A0A3B3ISV4	0	0	0	0	1	0	0	0	1	0	0
A0A3B3ISV5;Q8N9N7	0	0	1	0	0	0	0	0	0	0	0
A0A3B3ISV8;A0A6Q8PF19;A0A6Q8PFS9;A0A6Q8PHH0;Q8IZF0	0	0	1	0	0	0	0	0	1	0	1
A0A3B3ISV9;O43414	0	0	0	0	0	0	0	0	0	0	0
A0A3B3IT21	0	1	0	0	0	0	0	0	0	1	1
A0A3B3IT28;A0A3B3ITE5;A0A3B3ITF7;A0A3B3ITW6;A0A3B3IU40;A0A3B3IUA1;A0A3F2YNW9;Q12756;Q12756-2;Q12756-3	0	0	0	0	0	0	0	1	0	0	0
A0A3B3IT31;Q9NUN5;Q9NUN5-3	0	0	0	0	1	0	0	0	1	0	0
A0A3B3IT37;Q5SXQ3;Q5SXQ5;Q8IYK4	0	0	0	0	0	0	0	1	0	1	1
A0A3B3IT92;P33991	0	1	0	0	0	0	0	0	0	0	0
A0A3B3ITH3;Q9P2X3	0	0	0	0	0	0	1	0	0	0	0
A0A3B3ITK0;P35442	0	0	0	0	0	0	1	0	0	0	0
A0A3B3ITN0;Q86TP1	0	0	0	0	0	0	1	0	0	0	0
A0A3B3ITN6;D6RBB0;O60683;O60683-2	0	0	0	1	0	0	0	1	0	0	0
A0A3B3ITP4;Q495G5;Q8IVH4	0	0	0	0	0	0	0	1	0	0	0
A0A3B3ITT1	0	0	0	0	0	0	0	0	0	0	0
A0A3B3ITT5;P47914	0	0	0	0	1	0	0	1	0	0	0
A0A3B3ITU8;A0A3B3IU04;A0A3F2YNW8;Q14643;Q14643-2;Q14643-3;Q14643-4;Q14643-5;Q14643-6;Q14643-7;Q14643-8	0	0	0	0	1	0	0	0	0	0	1
A0A3B3ITW1;P49841;P49841-2	0	0	0	0	0	0	1	0	0	0	0
A0A3B3IU42;G5EA29;H0YDP6;H0YEL0;O14893;O14893-2;O14893-3	1	0	0	0	0	1	0	0	0	0	0
A0A3B3IU65;A9UHW6;A9UHW6-2;A9UHW6-3;J3KSU6;J3QLD1;J3QLJ5;J3QRZ6	1	0	0	0	0	1	0	0	0	0	0
A0A3B3IU69;F8W717;O00423;O00423-3	1	0	0	0	0	0	0	0	0	0	0
A0A3B3IUA2;B1AHD1;P55769	0	1	0	0	0	0	0	0	0	0	0
A0A3B3IUB1;Q13144	1	1	0	0	0	0	0	0	0	0	0
A0A3B3IUB5;Q8TCT9;Q8TCT9-5	0	0	0	0	1	0	0	0	0	0	0
A0A3B3IUC4;A0A6Q8PFA9;P06280	0	1	0	0	0	0	0	1	0	0	0
A0A3B3IUD2;Q9BUK6;Q9BUK6-2;Q9BUK6-3;Q9BUK6-7	0	0	0	0	0	0	1	0	0	0	0
A0A3B3IUD4;P21453	0	0	0	0	0	0	0	0	0	1	1
A0A3B3IUD7;Q14690	0	1	0	0	0	0	0	0	0	0	1
A0A3Q5ACI7	0	0	0	0	0	0	0	0	1	0	1
A0A494BWY4;Q6IEE7	0	0	1	0	0	0	0	0	0	0	0
A0A494BXY3;E9PLD3;E9PRG8	0	1	0	0	0	1	0	0	1	0	0
A0A494BZU6;A0A494BZW7;A0A494C002;A0A494C0P9;A0A494C0Q2;A0A494C0Q6;A0A494C0W0;A0A494C156;A0A494C1K5;A0A494C1N1;O95453;O95453-2	0	1	0	0	0	0	0	0	0	0	0
A0A494BZV4;A0A494C069;Q08AG5	0	0	0	0	0	0	0	0	0	1	0
A0A494C004;A0A494C0C5;A0A494C0D2;A0A494C0V5;A0A494C141;A0A494C1C6;A0A499FJ53;A6XNE1;F6Y2X3;Q16635;Q16635-2;Q16635-3;Q16635-4;Q16635-5;Q16635-6;Q16635-7;Q16635-8;Q16635-9	0	1	0	0	0	0	0	1	0	0	1
A0A494C023	0	0	0	0	0	0	0	0	1	1	0
A0A494C028;H0Y993;P35659	0	1	0	0	0	0	0	0	0	0	0
A0A494C039	0	0	1	0	0	0	0	0	1	1	0
A0A494C066;B7Z4W5;Q16773	0	0	0	0	0	0	1	0	0	0	0
A0A494C068;A0A494C1K7;E9PGP6;Q9UGJ0;Q9UGJ0-2;Q9UGJ0-3	0	0	0	0	0	0	0	0	0	0	0
A0A494C0J7;Q08188	0	0	0	1	0	0	0	1	0	0	0
A0A494C0K7;A0A494C0P0;Q6P2C8;Q6P2C8-2	0	1	0	0	0	0	0	0	0	0	1
A0A494C0M1;P52701	0	1	0	0	0	0	0	0	0	0	0
A0A494C0M2;O95925-3;Q9BQY6;Q9BQY6-2	0	0	0	0	0	1	0	0	1	1	0
A0A494C0N4;H9KV93;Q7Z4L5	0	0	0	0	0	1	0	0	0	1	0
A0A494C0P1;P04150;P04150-10;P04150-2;P04150-3;P04150-6;P04150-8;P04150-9	0	0	0	0	0	0	1	0	0	0	0
A0A494C0Q3	0	0	1	0	0	0	0	0	1	0	0
A0A494C0R8	1	0	0	0	0	1	0	0	0	0	0
A0A494C0X7;D3DSM0;P05107	0	0	0	0	1	0	0	0	0	1	1
A0A494C0Z5;Q9H082	0	0	1	0	1	0	0	0	0	0	0
A0A494C105;Q9H3U5;Q9H3U5-3;Q9H3U5-5;Q9H3U5-6	0	0	0	0	1	0	0	0	0	1	1
A0A494C108;Q8N9T8	0	1	0	0	0	0	0	0	0	0	0
A0A494C115;A0A494C1U4;K7N7A8;P29972;P29972-2;P29972-3;P29972-4	0	0	1	0	0	0	0	0	0	1	1
A0A494C143;Q14689;Q14689-6	0	1	0	0	0	0	0	0	0	0	0
A0A494C146;P50336	0	0	0	0	0	0	0	1	0	0	0
A0A494C164;P52630;P52630-4	1	0	0	0	0	0	1	0	0	0	0
A0A494C165;K7ES25;P12955	0	0	0	0	0	0	1	0	0	0	0
A0A494C167;Q9UHD2	0	0	0	0	0	0	1	0	0	0	0
A0A494C193;Q08E93	0	0	0	0	0	0	0	1	0	0	0
A0A494C1C4;P78552;P78552-2	0	0	1	0	0	0	0	0	1	0	0
A0A494C1F2;P35658;P35658-2;P35658-3;P35658-4;P35658-5	0	1	0	0	0	0	0	0	0	0	0
A0A494C1J1;Q69YQ0;Q69YQ0-2	0	1	0	0	0	0	0	0	0	1	1
A0A494C1J8	0	1	1	0	0	0	0	0	0	0	0
A0A494C1L5;P50851-2	1	0	0	0	0	0	1	0	0	0	0
A0A494C1M4;Q3SY69	0	0	0	0	0	0	0	0	0	0	0
A0A494C1N0;P26885	0	0	0	0	1	0	0	0	0	0	0
A0A494C1S7;Q9Y5Q9	0	1	0	0	0	0	0	0	0	0	0
A0A494C1T9;Q6ZRV2	0	1	0	0	0	0	0	0	0	0	1
A0A494C1V1;Q6ZNJ1;Q6ZNJ1-2;Q6ZNJ1-3	0	0	0	0	0	0	1	0	0	0	0
A0A499FI31;Q15020;Q15020-4	1	1	0	0	0	0	0	0	0	0	0
A0A499FI48;P13667	0	0	0	0	1	0	0	0	0	0	0
A0A499FIS5;A0A499FJN1;A0A499FJS1;Q9BUB5;Q9BUB5-2;Q9BUB5-3	1	0	0	0	0	0	1	0	0	0	0
A0A499FIX8;A0FGR8-2;H7BXI1	0	0	0	0	1	0	0	0	0	0	0
A0A499FIY8;C9JC07;C9JZL8;Q96S97	0	0	0	0	0	0	0	0	0	1	1
A0A499FIZ0	1	0	0	0	0	0	0	0	0	0	0
A0A499FJI4;O75592;O75592-2	0	0	0	0	0	0	0	0	0	0	0
A0A499FJM4;P08684	0	0	0	0	1	0	0	0	1	0	0
A0A539;A0A589	0	0	1	0	0	0	0	1	0	0	0
A0A590PXD8;Q53SF7-3	0	0	0	0	0	0	0	0	0	0	0
A0A590UIU4;A0A590UJ09;A0A590UJ61;A0A590UJC8;A0A590UJF4;A0A590UJG1;A0A590UJH1;A0A590UJS0;A0A590UJT1;A0A590UK11;A0A590UK42;A0A590UK98;Q5VZ66	0	0	1	0	0	0	0	0	0	0	0
A0A590UJ36;A6NDB9	0	0	0	0	0	0	0	0	0	0	0
A0A590UJ43;P48729;P48729-3;U3KPX3	0	1	0	0	0	0	0	0	0	0	0
A0A590UJ46	0	0	0	0	0	0	0	0	1	0	1
A0A590UJ50;A0A590UJR3;Q13616	1	0	0	0	0	0	1	0	0	0	0
A0A590UJ62;E7ETH1;Q14003	0	0	1	0	0	0	0	0	1	0	0
A0A590UJ68;A0A590UJR5;A0A590UJS9;A0A590UKA8;Q12959;Q12959-3;Q12959-5;Q12959-6;Q12959-7	0	0	0	1	0	0	0	0	0	1	1
A0A590UJ73;A0A590UJW4;E7EQB3;Q9BSV6	0	0	0	0	0	0	1	0	0	0	0
A0A590UJA9;C9JCW7;C9JE12;Q9BVT8	0	0	0	0	1	0	0	0	0	0	0
A0A590UJB6	0	0	0	0	0	0	0	0	1	1	0
A0A590UJC7;A0A590UK51;O60733;O60733-2	0	0	0	0	0	0	0	0	0	0	0
A0A590UJF0;P63092-3	0	0	0	0	1	0	0	0	0	0	1
A0A590UJG2;Q9UPN3-2;Q9UPN3-3	0	0	0	0	0	0	0	0	0	0	0
A0A590UJK3;Q14BN4;Q14BN4-2;Q14BN4-3	0	0	0	0	1	0	0	0	0	0	0
A0A590UJK4;A0A590UJP7;A0A590UK01;A0A590UK80;Q13247;Q13247-3	0	1	0	0	0	0	0	0	0	0	0
A0A590UJL0;P08842	0	0	1	0	0	0	0	0	0	0	0
A0A590UJN0;E7ETK1;E9PBA8;Q52LR7;Q9H2F5;Q9H2F5-2	0	1	0	0	0	0	0	0	0	0	0
A0A590UJS8;A0A5F9ZA98;B4DGL8;O75027;O75027-2	0	0	0	0	0	0	0	1	0	0	0
A0A590UJW0;A0A590UKC9;P20585	0	1	0	0	0	0	0	0	0	0	0
A0A590UJW8;Q96J02;Q96J02-2	0	1	0	0	0	0	0	0	0	0	0
A0A590UJY5	0	0	1	0	0	0	1	0	0	0	0
A0A590UK09;A0A590UK73;B1AKN5;B1AKN7;B1AKN8;Q12857;Q12857-2;Q12857-4	0	1	0	0	0	0	0	0	0	0	0
A0A590UK87	1	0	0	0	0	0	0	0	0	0	0
A0A590UKC3;Q9UF12	0	0	0	0	0	0	0	1	0	0	0
A0A5E8;Q99501;Q99501-2;Q99501-3;Q99501-4	0	0	0	1	0	0	0	1	0	0	0
A0A5F9UK94;H0Y360;Q01433;Q01433-2	1	0	0	0	0	0	1	0	0	0	0
A0A5F9UP49;Q9BRK5	0	0	0	0	0	0	0	0	1	0	0
A0A5F9UY30;A0A5H1ZRP2;O43493;O43493-3;O43493-5;O43493-7	0	0	0	0	1	0	0	0	1	0	0
A0A5F9YFS9;C9JBL1;Q9Y6A9	0	0	0	0	1	0	0	0	0	0	0
A0A5F9YLF9	0	0	1	0	0	0	0	0	0	0	0
A0A5F9ZGN6	0	0	0	0	0	0	0	0	0	1	0
A0A5F9ZGW5;C9J8U3;Q7Z2E3-13;Q7Z2E3-5;Q7Z2E3-7;Q7Z2E3-9	0	0	0	0	1	0	0	0	0	0	0
A0A5F9ZGX0	0	0	0	0	0	0	0	0	0	1	1
A0A5F9ZGX3;A0A5F9ZGY3;A0A5F9ZGY4;A0A5F9ZGZ5;A0A5F9ZH19;A0A5F9ZH30;A0A5F9ZHD2;A0A5F9ZHE4;A0A5F9ZHN5;A0A5F9ZHR8;A0A5F9ZHS1;A0A5F9ZI30;A0A5F9ZI40;A0A5F9ZI65;D6RHE1;I6L894;Q01484	0	1	0	0	0	0	0	0	0	0	0
A0A5F9ZGY7	0	0	0	0	0	0	1	0	0	0	0
A0A5F9ZH20;A0A5F9ZH60;A0A5F9ZH84;Q5TF39	0	0	0	0	0	0	0	0	0	0	0
A0A5F9ZH43;A0A5F9ZHW6;A4UGR9-4;A4UGR9-5;A4UGR9-6;A4UGR9-7	0	0	0	0	0	0	0	1	0	1	1
A0A5F9ZH85	0	0	0	0	0	0	0	1	1	0	0
A0A5F9ZH93;A0A5F9ZHX9;Q9UHN1	0	0	0	0	0	0	0	1	0	0	0
A0A5F9ZHE0;C9JQD1;P35557	0	0	0	0	0	0	1	0	0	0	0
A0A5F9ZHH6;P19793;P19793-2	0	1	0	0	0	0	0	0	0	0	0
A0A5F9ZHJ0	0	0	0	0	0	0	0	1	0	0	0
A0A5F9ZHM4;P07195	0	0	0	0	0	0	1	0	0	0	0
A0A5F9ZHN2;E7EWD6;Q76L83;Q76L83-2	0	1	0	0	0	0	0	0	0	0	0
A0A5F9ZHN7;Q9NTJ5	0	0	0	0	1	0	0	0	0	0	0
A0A5F9ZHN9;P51648;P51648-2	0	0	0	0	1	0	0	0	0	0	0
A0A5F9ZHP1;Q8N9N2-2	0	0	0	0	0	0	0	0	0	0	0
A0A5F9ZHQ6;A0A6I8PIF8;A0A6I8PIP2;A0A6I8PU78;O75071;S4R3Q1	0	0	1	0	0	0	0	0	0	0	0
A0A5F9ZHX8;A0A5F9ZHZ5;F5GYY5;F5H324;P51690	0	0	0	0	1	0	0	0	0	0	0
A0A5F9ZI21;Q92974;Q92974-2;Q92974-3;V9GYF0;V9GYM8	0	0	0	0	0	0	0	0	0	0	1
A0A5F9ZI33	0	0	0	0	1	0	0	0	0	0	1
A0A5F9ZI76;Q32ZL2;Q32ZL2-2	0	0	0	0	0	0	0	1	0	1	0
A0A5H1ZRP4;Q8WX92;Q8WX92-2	0	1	0	0	0	0	0	0	0	0	0
A0A5H1ZRR2;G9CGD6;G9CGD6-2;G9CGD6-3;Q6P9H4	0	0	0	0	0	0	0	0	0	0	0
A0A5H1ZRS1	0	0	0	0	0	0	0	0	0	0	0
A0A5K1VW60;Q99766	0	0	0	0	0	0	0	1	0	0	0
A0A5K1VW66;P35240;P35240-2;P35240-3;P35240-4;P35240-5;P35240-6;P35240-8	0	0	1	0	0	0	0	0	0	0	1
A0A5K1VW70;P98198;P98198-3	0	1	0	0	0	0	0	0	0	0	0
A0A5K1VW95;P40925;P40925-3	0	0	0	0	0	0	1	0	0	0	0
A0A669KA36;A0A669KB88;B7ZLR4;E7ET55;F5H748;P35670;P35670-2;P35670-4	0	0	0	0	1	0	0	0	0	0	0
A0A669KAV7;A0A669KBH9;M0QXA7;O95785-3	0	1	0	0	0	0	0	0	0	0	0
A0A669KAW1;G3XAD2;Q9BYC5;Q9BYC5-2;Q9BYC5-3	0	0	0	0	0	0	0	0	1	0	0
A0A669KAX3;O76024	0	0	0	0	1	0	0	0	0	0	0
A0A669KAX4;K4DI93;Q13620;Q13620-1;Q13620-3	1	0	0	0	0	0	1	0	0	0	0
A0A669KAX9;Q5T653	0	0	0	0	0	0	0	1	0	0	0
A0A669KAY5;A0A669KB27;A0A669KBH7;C9JTE9;Q9UHQ4;Q9UHQ4-2	0	0	0	0	1	1	0	0	1	0	0
A0A669KB10;A0A669KBG8;Q92538;Q92538-2;Q92538-3	0	0	0	0	0	1	0	0	1	0	0
A0A669KB12;Q09472	0	1	0	0	0	0	0	0	0	0	0
A0A669KB29;K7EQ21;K7EQZ1;Q9P0U4;Q9P0U4-2	0	0	0	0	0	0	0	0	0	0	0
A0A669KB41;A0A669KBH5;D6RA31;E7EPV7;P37840;P37840-2;Q16143	0	0	0	0	0	0	1	0	0	0	0
A0A669KB53;A0A669KB56;A0A669KB68;A0A669KBA4;A0A669KBI6;J3KPM9;P42224;P42224-2	0	0	0	0	0	0	1	0	0	0	0
A0A669KB69;Q6Q788	0	0	0	0	0	0	0	0	1	0	0
A0A669KB71;O94842;O94842-2;O94842-3	0	0	0	0	0	1	0	0	0	0	0
A0A669KB81	0	0	0	0	0	0	0	0	1	0	0
A0A669KBE6;A0A669KBF5;Q9NV96;Q9NV96-2;Q9NV96-3	0	0	0	0	1	0	0	0	0	0	1
A0A669KBF4;O00327;O00327-1;O00327-6;O00327-7;O00327-8;O00327-9	0	1	0	0	0	0	0	0	0	0	0
A0A669KBG1	0	0	1	0	0	0	0	0	1	0	0
A0A669KBH1	0	0	0	0	0	1	0	0	1	0	0
A0A669KBH4;Q14999;Q14999-2	1	1	0	0	0	0	0	0	0	0	0
A0A669KBJ1;Q9P202;Q9P202-3;Q9P202-4	0	0	0	0	0	0	0	0	1	0	0
A0A669KBJ4;E7ERL6;Q6P0Q8;Q6P0Q8-2	0	0	1	0	0	0	0	0	0	0	0
A0A669KBJ7;Q9H2P0	0	1	0	0	0	0	0	0	0	0	0
A0A669KBL1;Q93009;Q93009-3	1	1	0	0	0	0	0	0	0	0	0
A0A6E1WB48;Q14541;Q14541-2	0	0	0	0	0	0	0	1	1	0	0
A0A6E1WCP9;H0YGT3;P11474;P11474-2	0	1	0	0	0	0	0	0	0	0	0
A0A6I8PIT3;A0A6I8PIV1;Q9P2J5	1	0	0	0	0	0	0	0	0	0	0
A0A6I8PR89	0	0	0	0	0	1	0	0	1	0	0
A0A6I8PRM6;B1ALU3;O95490-2;O95490-5	0	0	0	0	0	0	0	0	0	1	1
A0A6I8PS32;Q99615	0	0	0	0	0	0	1	0	0	0	0
A0A6I8PTZ8;Q9UL18	0	0	0	0	1	0	0	0	0	0	0
A0A6I8PU65;Q9NUD9	0	0	1	0	0	0	0	0	1	0	0
A0A6Q8JGF9;I3L1H5;I3L3X9;Q9BZG8;Q9BZG8-2;Q9BZG8-3	0	0	0	0	0	0	1	0	0	0	0
A0A6Q8KRG2;Q08379	0	0	0	0	0	1	0	0	1	0	0
A0A6Q8PEX6;A0A6Q8PFB7;A0A6Q8PG86;A0A6Q8PHF4;O95163	1	0	0	0	0	0	0	0	0	0	0
A0A6Q8PEY3;A0A6Q8PGV6;I3L3G9;I3L522;Q9NXR1;Q9NXR1-1	0	0	1	0	0	0	0	0	1	0	0
A0A6Q8PEZ4;A0A6Q8PFG4;A0A6Q8PGL3;A0A6Q8PGS2;A0A6Q8PGU0;A0A6Q8PH79;B4DIH2;Q8TB36;Q8TB36-2	0	1	0	0	0	0	0	1	0	0	0
A0A6Q8PEZ7;A0A6Q8PG30;A0A6Q8PHQ1;Q96S66	0	0	0	0	1	0	0	0	0	0	0
A0A6Q8PEZ8;A0A6Q8PGJ3;J3KNA1;Q12840	0	1	0	0	0	0	0	0	0	1	0
A0A6Q8PF03	0	0	0	0	0	0	1	0	0	0	0
A0A6Q8PF05;B4DHE8;J3KTC1;Q96DH6;Q96DH6-2	0	0	0	0	0	0	0	0	0	0	0
A0A6Q8PF14	0	0	0	0	0	0	0	0	1	0	0
A0A6Q8PF33;A0A6Q8PGE8;A0A6Q8PGN5;H3BPK7;P49588	0	0	0	0	0	0	1	0	0	0	0
A0A6Q8PF40;A0A6Q8PFC4;A0A6Q8PFY7;A0A6Q8PG00;A0A6Q8PG04;A0A6Q8PGS4;A0A6Q8PH27;A0A6Q8PH89;Q92734;Q92734-2;Q92734-3;Q92734-4	0	0	0	0	0	0	1	0	0	0	0
A0A6Q8PF44;A0A6Q8PH71;A0A6Q8PHA2;A0A6Q8PHG2;Q27J81;Q27J81-2	0	0	0	0	0	0	0	0	0	0	0
A0A6Q8PF62;A0A6Q8PF70;A0A6Q8PF86;A0A6Q8PFJ3;A0A6Q8PG59;A0A6Q8PGB4;A0A6Q8PGP4;A0A6Q8PGY4;A0A6Q8PGY7;A0A6Q8PHA1;A0A6Q8PHC7;A0A6Q8PHH5;A0A6Q8PHK3;A0A6Q8PHP5;Q92562	0	0	0	0	0	1	0	0	1	0	0
A0A6Q8PF83;A0A6Q8PGD1;A0A6Q8PH95;D6REX9;Q8N960;Q8N960-2	0	1	0	0	0	0	0	0	0	0	0
A0A6Q8PF94;O15344	0	0	0	0	1	0	0	0	0	0	0
A0A6Q8PFA4;A0A6Q8PFD4;A0A6Q8PFI6;A0A6Q8PFL5;A0A6Q8PFT9;A0A6Q8PFW1;A0A6Q8PG02;A0A6Q8PG22;A0A6Q8PGB2;A0A6Q8PGF7;A0A6Q8PGH6;A0A6Q8PGT8;A0A6Q8PGW1;A0A6Q8PGY0;A0A6Q8PH15;A0A6Q8PH70;A0A6Q8PH85;Q6UWE0;Q6UWE0-2	0	0	0	0	0	0	1	0	0	0	0
A0A6Q8PFA6;A0A6Q8PG37;A0A6Q8PGH7;A0A6Q8PH57;O00139;O00139-1;O00139-2;O00139-4;O00139-5	0	1	0	0	0	0	0	0	0	0	0
A0A6Q8PFE6;Q9UKA9;Q9UKA9-2;Q9UKA9-3;Q9UKA9-4	0	1	0	0	0	0	0	0	0	0	0
A0A6Q8PFG0;A0A6Q8PGT4;A0A6Q8PH04;A0A6Q8PHN3;A0A6Q8PHP9;Q9P212;Q9P212-2	0	0	0	0	0	0	0	0	1	0	0
A0A6Q8PFI8;P11166	0	0	0	0	0	1	0	0	0	0	0
A0A6Q8PFJ0;P02545	0	1	0	0	0	0	0	0	0	0	0
A0A6Q8PFJ4;A0A6Q8PGV8;O95140	0	0	0	0	0	0	0	1	0	0	0
A0A6Q8PFK4;P50747	0	0	0	0	0	0	1	0	0	0	0
A0A6Q8PFM5;O95831;O95831-3	0	0	0	0	0	0	0	1	0	0	0
A0A6Q8PFU3;P43034	1	0	0	0	0	0	1	0	0	0	0
A0A6Q8PG52;A0A6Q8PH84;P51149	0	0	1	0	0	0	0	0	0	0	0
A0A6Q8PG54;G3XAG5;P51793;P51793-2	0	0	0	0	0	0	0	0	1	0	0
A0A6Q8PG85;Q9HD42	0	0	0	0	0	0	1	0	0	0	0
A0A6Q8PGA8;A0A6Q8PGI6;A0A6Q8PGZ8;A0A6Q8PHH9;P41250	0	0	0	0	0	0	1	0	0	0	0
A0A6Q8PGB0;P24928	0	1	0	0	0	0	0	0	0	0	0
A0A6Q8PGM6;Q9UJY1	0	0	0	0	0	0	0	0	1	0	0
A0A6Q8PGS5;A0A6Q8PHS7;C9JEX3;Q13614;Q13614-2	0	0	0	0	0	0	0	0	0	0	0
A0A6Q8PGU6;Q8NB90	0	0	0	0	0	0	0	0	0	0	0
A0A6Q8PH13;A0A6Q8PH87;Q86WG5;Q86WG5-3	0	0	0	0	0	0	0	0	0	0	1
A0A6Q8PHA5;E7ETE2;P12081;P12081-4	1	0	0	0	0	0	1	0	0	0	0
A0A6Q8PHC6;P50440	0	0	0	0	0	0	0	1	0	0	0
A0A6Q8PHH2;O95251;O95251-2;O95251-4	0	1	0	0	0	0	0	0	1	0	0
A0A6Q8PHK0;Q14669-2	0	1	0	0	0	0	0	0	0	0	0
A0A6Q8PHM5	0	0	0	0	0	0	0	1	0	0	0
A0A6Q8PHP0;P49902;P49902-2	0	0	0	0	0	0	1	0	0	0	0
A0AV96-2	0	1	0	0	0	0	0	0	0	0	0
A0AVL1;F8WC54;Q13443;Q13443-2	0	0	0	0	0	0	0	1	0	0	0
A0AVT1	0	0	0	0	0	0	1	0	0	0	0
A0MZ66	0	0	0	0	0	0	1	0	0	0	0
A0PJW6	0	0	0	0	0	0	0	1	0	0	0
A0PJX8	0	0	0	0	1	0	0	0	1	0	0
A0PJZ3;C9JND4	0	0	0	0	0	0	0	0	1	1	0
A0RZB6	0	0	1	0	0	0	0	0	0	0	0
A1A4S6;H0Y8W5	0	1	0	0	0	0	0	0	0	1	1
A1A519;A1A519-2;A1A519-3;D6RIE9	0	0	0	0	0	0	0	0	0	0	0
A1A5C7;A1A5C7-2;A1A5C7-3;C9J4Z0	0	1	1	0	0	0	0	0	0	1	1
A1IGU5	0	0	0	0	0	0	0	0	0	0	0
A1KZ92;A1KZ92-2;A1KZ92-3;H0YAV0;K4DIA6	0	1	0	0	0	0	0	1	0	0	0
A1L0T0	0	0	1	0	1	0	0	0	0	0	0
A1L188	0	0	0	0	0	0	0	0	0	0	0
A1L390;A1L390-3	0	0	1	0	0	0	0	0	0	0	0
A1X283	0	0	0	0	0	0	1	0	0	0	0
A2A274;Q99798	0	0	0	0	0	0	0	1	0	0	0
A2A2L4;Q5JX74;Q9NUS5	0	0	0	0	0	0	0	0	0	0	0
A2A2N0;O60676	0	0	0	0	0	0	0	1	0	0	0
A2A2Q9;Q9Y312	0	0	0	0	0	0	1	0	0	0	0
A2A2V1;P04156	0	0	1	0	0	0	0	0	1	0	0
A2A2V2;P42696;P42696-2;Q5TCT4	0	1	0	0	0	0	0	0	0	0	0
A2A369;Q8NF50;Q8NF50-2;Q8NF50-3;Q8NF50-4	0	0	0	0	1	0	0	0	0	0	0
A2A3G7	0	0	0	0	0	0	0	0	1	0	0
A2AJT9;A2AJT9-2;A2AJT9-3;F2Z385;H7BXX2	0	1	0	0	0	0	0	0	0	0	0
A2IDC6;Q13084	0	0	0	0	0	0	0	1	0	0	0
A2RRP1	0	0	1	0	1	0	0	0	0	0	0
A2RTX5;B7ZLP8	1	0	0	0	0	1	0	0	0	0	0
A2RU37	0	0	0	0	0	1	0	0	1	0	0
A2RU49	0	0	0	0	0	0	1	0	0	0	0
A2RUC4	0	0	0	0	0	0	1	0	0	0	0
A2RUS2;A2RUS2-2;A2RUS2-4;E5RHH2;E5RI43;E5RIR7;E5RJ42;E9PF32;H0YAY3	0	0	0	0	0	0	0	1	0	0	0
A2VDF0	0	0	0	0	0	0	1	0	0	0	0
A2VDJ0;A2VDJ0-3;A2VDJ0-5	0	0	1	0	0	0	1	0	0	0	0
A3KFL2;Q13868;Q13868-2;Q13868-3	0	1	0	0	0	0	0	0	0	0	0
A3KMH1;A3KMH1-3	0	0	0	0	0	0	0	1	0	0	0
A3KN83;A3KN83-2;A3KN83-3	0	1	0	0	0	0	1	0	0	0	0
A4D1E9	0	0	0	0	0	0	0	1	0	0	0
A4D1P6	1	0	0	0	0	1	0	0	0	0	0
A4D1U4;C9J7X6	0	0	0	0	0	0	0	0	0	0	0
A4D2B0	0	0	0	0	0	0	1	0	0	0	0
A4FU69-5;A4FU69-6	0	0	0	0	0	1	0	0	1	0	0
A5D8V6;F5H4Q5	0	0	0	0	0	0	1	0	0	0	0
A5D8V7;A5D8V7-2;K7EN59;K7EPK8	0	0	0	0	0	0	0	1	0	0	0
A5PLN9;A5PLN9-2;A5PLN9-4;A5PLN9-5	0	0	0	0	0	1	0	0	0	0	0
A5YKK6;A5YKK6-2	0	0	0	0	0	0	0	0	0	0	0
A6H8Y7;Q6ZRK6;Q6ZRK6-2	0	0	0	0	0	0	0	0	1	0	0
A6NC57;A6NC57-2	0	0	1	0	0	0	0	0	0	0	0
A6NC78	0	0	0	0	0	0	0	1	0	0	0
A6NCC9;C9JHT9;C9JJV1;E9PME3;Q9Y5U2;Q9Y5U2-2	0	0	1	0	0	0	1	0	0	0	0
A6NCE7;H3BTL1;Q9GZQ8	0	0	0	0	0	1	0	0	1	0	0
A6NCS6	0	0	0	0	0	0	0	0	0	1	1
A6ND36	0	0	0	0	0	0	0	0	0	0	0
A6ND91	0	0	0	0	0	0	1	0	0	0	0
A6NDG6	0	0	0	0	0	0	1	0	0	0	0
A6NDL8	1	0	0	0	0	0	0	0	0	0	0
A6NDR6	0	0	0	0	0	0	0	0	1	0	0
A6NDU8	0	0	0	0	0	0	1	0	0	0	0
A6NE01;F5GYN0;F5H8C1	0	0	0	0	0	1	0	0	1	0	0
A6NED2;G3V2I3	0	0	0	0	0	0	1	0	0	0	0
A6NEE1	1	0	0	0	0	0	0	0	0	0	0
A6NEL0;A6NL93;P05114	0	1	0	0	0	0	0	0	0	0	0
A6NEL2	0	1	0	0	0	0	0	0	0	0	1
A6NEM2;P51610;P51610-2;P51610-4	0	1	0	0	0	0	0	0	0	0	0
A6NEY8	0	0	0	0	0	0	1	0	0	0	0
A6NF36	0	0	0	0	0	0	0	1	0	0	0
A6NFQ9;F8W8I8	0	1	0	0	0	0	0	0	0	0	0
A6NFS0;Q9NSD4;Q9NSD4-2	0	1	1	0	0	0	0	0	0	0	0
A6NFV8;D6RCT8	0	0	0	0	0	0	0	0	1	0	0
A6NFX8;Q9UKK9	0	0	0	0	0	0	1	0	0	0	0
A6NFY7	0	0	0	0	0	0	0	1	0	0	0
A6NG10;K7EIJ0;K7EMC9;K7ENL2;Q969T9	0	0	0	0	0	0	1	0	0	0	0
A6NGA6;Q5H9D4;Q9Y5S8;Q9Y5S8-2;Q9Y5S8-3	0	0	0	0	0	0	0	0	1	0	0
A6NGJ0;P51808	0	0	0	0	0	0	0	0	0	0	0
A6NGL4;P0CW00	0	0	1	0	0	0	0	0	0	1	0
A6NGQ3;Q5VST9;Q5VST9-2;Q5VST9-6	0	0	0	1	0	0	0	0	0	0	0
A6NGU5;B5MCK8;P19440	0	0	0	0	0	0	0	0	0	1	1
A6NGW1;O95070	0	0	0	0	1	0	0	0	1	0	0
A6NGY7;Q9H694-2	0	1	0	0	0	0	0	0	0	1	1
A6NH11	0	0	0	0	0	1	0	0	1	0	0
A6NHG8;Q13114	0	0	0	0	1	0	0	0	0	0	0
A6NHJ8;A6NND8;C9JAL0;C9K0F7;H7C3I5;O95825;O95825-2	0	0	0	1	0	0	0	0	0	0	0
A6NHR9;A6NHR9-2	0	1	1	0	0	0	0	0	0	0	0
A6NI28;E9PJK4	0	1	0	0	0	0	0	0	0	0	1
A6NI72;A8MVU1;C9J155;P14598;P14598-2	0	0	0	0	0	1	0	0	0	0	0
A6NIH7	0	0	0	0	0	0	1	0	0	0	0
A6NIT2;A6NMN0;P46020;P46020-2;P46020-3	1	0	0	0	0	0	1	0	0	0	0
A6NIV6	0	0	1	0	0	0	0	0	0	0	0
A6NIZ0;Q9GZM8;Q9GZM8-2;Q9GZM8-3	0	0	0	0	0	0	0	0	0	0	0
A6NJA2;P54578;P54578-2;P54578-3	1	0	0	0	0	0	0	0	0	0	0
A6NJZ7;A6NNM3;J3KP16;Q9UFD9	0	0	0	1	0	1	0	0	0	0	0
A6NK44;H7C348	0	0	0	0	0	0	0	0	0	0	1
A6NKB5-2	0	0	0	0	0	0	0	0	1	1	0
A6NKD9	0	1	0	0	0	0	0	0	0	1	1
A6NKN8	0	0	0	0	0	0	1	0	0	0	0
A6NKZ2;P51606	0	0	0	0	0	0	1	0	0	0	0
A6NLH6;Q9P003	0	0	0	0	1	0	0	0	0	0	0
A6NLN1;P26599;P26599-2;P26599-3	0	1	0	0	0	0	0	0	0	0	0
A6NLP5	0	0	0	0	0	0	1	0	0	0	0
A6NMH6;Q92599;Q92599-2;Q92599-4	0	1	0	0	0	0	0	0	0	0	0
A6NML8;C9J6U3;O60879-2	1	0	0	0	0	0	1	0	0	0	0
A6NMQ3;O43768;O43768-2;O43768-3;O43768-4;O43768-9;Q5T5H1	0	0	0	0	0	0	1	0	0	0	0
A6NMV7	0	0	1	0	0	0	0	0	0	0	0
A6NMZ5	0	0	1	0	0	0	0	0	0	0	1
A6NMZ7;A6NMZ7-2	0	1	0	0	0	0	0	0	0	0	0
A6NN50;O75147;O75147-1;O75147-2;O75147-4	1	0	0	0	0	1	0	0	1	0	0
A6NNK5;Q12888;Q12888-2;Q12888-3	0	1	1	0	0	0	0	0	0	0	0
A6NP16;E7ERM3;Q4VCS5;Q4VCS5-2	0	1	0	0	0	0	0	0	0	0	0
A6NP52;O60831	0	0	0	0	1	0	0	0	0	0	0
A6PVD3;P48436;P56693;P56693-2;P57073	0	0	1	0	0	0	0	0	1	0	0
A6PVK5	0	0	0	0	0	0	0	0	0	0	0
A6PVU8;Q6UWW7;Q9NNX1;Q9NNX1-2;Q9NNX1-3	0	0	0	0	0	0	0	0	0	0	0
A6PVY1;A6PVY2;A6PVY3;A6PVY3-2	0	0	0	0	0	0	1	0	0	0	0
A6PW57;Q99755;Q99755-3;Q99755-4	0	0	1	0	0	0	0	0	0	1	1
A6PWM2;Q6UXH1;Q6UXH1-2;Q6UXH1-3;Q6UXH1-4;Q6UXH1-5;Q6UXH1-6	0	0	0	0	1	0	0	0	0	0	0
A6XND0;A6XND1;B3KWK7;C9JMX4;H0Y5K2;P17936;P17936-2	0	0	0	0	1	0	0	0	0	0	1
A7E2V4;A7E2V4-3;A7E2V4-4;A7E2V4-5;S4R393;S4R410	1	0	0	0	0	1	0	0	1	0	0
A7KAX9;A7KAX9-2	1	0	0	0	0	0	0	0	0	0	0
A7MCY6	0	0	0	0	0	0	0	0	0	0	0
A7XZE4;Q3SX28	0	1	0	0	0	0	0	0	0	1	0
A8CG34;A8CG34-2	0	1	0	0	0	0	0	0	0	0	0
A8DPD7;Q9C0D3	0	0	0	0	0	0	0	0	0	0	1
A8MPP7;A8MPY5;E7ETV6;Q9UPE1;Q9UPE1-2;Q9UPE1-3;Q9UPE1-4	0	0	1	0	0	0	0	0	1	0	0
A8MQ02	0	1	0	0	0	0	0	0	0	0	0
A8MQB8;G3V0J0;Q06787-2	0	0	1	0	0	0	0	0	0	1	0
A8MSI8;D6RAR2;D6RFL2;J3KTA2	0	0	0	0	0	0	0	1	0	0	1
A8MSY1;C9JYJ2;Q8IVN3	0	0	1	0	0	0	1	0	0	0	0
A8MT69;A8MT69-2;A8MT69-3;J3QR01;J3QRS1	0	0	1	0	0	0	0	1	0	0	0
A8MTT3	0	0	0	0	0	0	0	1	0	0	0
A8MUM1;Q53HC9	0	0	0	1	0	0	0	0	0	0	0
A8MVV6;E9PN41;E9PPX8;E9PSH3;J3KQ42;O14817	0	0	0	0	0	0	0	0	0	0	1
A8MVZ6;Q96G01;Q96G01-3;Q96G01-4	0	0	0	0	0	0	0	0	1	0	0
A8MWD9;F5H013;P62308;Q49AN9	0	1	0	0	0	0	0	0	0	0	0
A8MXB7	1	0	0	0	0	0	1	0	0	0	0
A8MXV4	0	0	0	1	0	0	0	1	0	0	0
A8MYA3;J3KQ25;Q8N6M9	0	0	0	0	0	0	0	0	0	0	0
A8MYZ0	0	0	1	0	0	0	0	1	0	0	0
A8TX70;A8TX70-2;E9PAL5	0	1	0	0	0	0	0	0	0	0	0
A9J4F5;O00488	0	0	0	0	0	0	0	1	0	0	1
A9X3U0;Q96GF1	0	0	0	0	0	0	0	0	0	0	0
A9Z1X7;E9PCT1;Q8IYB3;Q8IYB3-2	0	1	0	0	0	0	0	0	0	0	0
B0QY89;Q9Y262	1	0	0	0	0	1	0	0	0	0	0
B0QY95;Q9NQG6	0	0	1	1	0	0	0	0	0	0	0
B0QYF8;P02144	0	0	1	0	0	0	0	0	0	0	0
B0QYK0;Q01844;Q01844-3;Q01844-5;Q01844-6	0	0	0	0	0	0	0	0	0	0	0
B0QYN7;H3BQQ9;P63279	0	0	0	0	0	0	1	0	0	0	0
B0QYP2;O95931	0	1	0	0	0	0	0	0	0	1	1
B0QYW5;F6RTR7;O43808	0	0	0	1	0	0	0	1	0	0	0
B0QZ18;F2Z2V0;Q99829	0	0	0	0	0	0	1	0	0	0	0
B0QZA9;Q6QHF9;Q6QHF9-4	0	0	1	0	0	0	0	1	0	0	0
B0YIW2;P02656	0	1	0	0	0	0	0	0	0	0	1
B1AH87;P30536	0	0	0	1	0	0	0	1	0	0	0
B1AHA8;P09601	0	0	0	0	1	0	0	0	0	0	0
B1AHB1	1	0	0	0	0	0	0	0	0	0	0
B1AHL2;P23142;P23142-2;P23142-3;P23142-4	0	0	0	0	0	0	1	0	0	0	0
B1AHR2	0	0	1	0	0	0	1	0	0	0	0
B1AJQ6;Q86Y82	0	0	0	0	0	0	0	0	1	0	0
B1AJS1;O14525;O14525-2;O14525-3	0	0	0	0	0	0	0	1	0	0	1
B1AK53	0	0	0	0	0	0	0	0	0	1	1
B1AK61;Q5VTY9;Q5VTY9-2;Q5VTY9-3;Q5VTY9-5;Q5VTY9-6;Q5VTY9-7	0	0	0	0	0	1	0	0	1	0	0
B1AK88;P47756-2	0	0	0	0	0	0	0	0	0	0	0
B1AKC9;P29323;P29323-2;P29323-3	1	0	0	0	0	1	0	0	1	0	0
B1AKG0;Q03591	0	0	1	0	0	0	0	0	1	1	0
B1AKI6;Q9NUK0;Q9NUK0-2	1	0	0	0	0	0	0	0	0	0	0
B1AKL4;Q9NRA8;Q9NRA8-2;Q9NRA8-3	0	0	0	0	0	1	0	0	1	1	0
B1AKR6;Q9NP97	1	0	0	0	0	1	0	0	0	0	0
B1AL05;H0Y6Y8;Q8N983;Q8N983-2;Q8N983-3;Q8N983-4;Q8N983-6;Q8N983-7	0	0	0	0	0	0	0	1	0	0	0
B1AL69;Q7L3B6	0	0	0	0	0	0	1	0	0	0	0
B1ALA9;P60891	1	0	0	0	0	0	0	0	0	0	0
B1ALD1;Q9Y6B7	0	0	0	0	0	1	0	0	0	1	0
B1ALM5;Q9P0T7	0	0	0	0	1	0	0	0	1	0	0
B1ALY0;Q8IXS6-2	0	0	0	0	0	0	1	0	0	0	0
B1AM21	0	1	0	0	0	0	0	1	0	0	1
B1AM27;O14795;O14795-2	0	1	0	0	0	0	0	0	0	0	0
B1AM31;Q5T1B0	0	0	0	0	0	0	0	0	1	0	0
B1AMI2	0	1	0	0	0	0	0	1	0	0	0
B1AMN7;Q9P2B4	0	0	0	1	0	0	0	0	0	0	0
B1AMS2;Q14141;Q14141-2;Q14141-4	0	1	0	0	0	0	0	0	0	0	0
B1AMT9;B1AMU0;B1AMU5;Q969W1;Q969W1-2;Q969W1-3;Q969W1-4	0	0	0	0	0	0	0	0	0	0	0
B1AMW1;H0YDI1;P19256;P19256-2;P19256-3	0	0	0	0	0	0	0	0	0	1	1
B1ANE6	1	0	0	0	0	0	0	0	0	0	0
B1ANH0;B1ANH2;Q16774;Q16774-2	0	0	0	0	0	0	0	0	0	0	0
B1APN9;O75335	1	1	0	0	0	0	0	0	0	0	0
B1APR7;Q99504;Q99504-2;Q99504-3;Q99504-4;Q99504-5	1	0	0	0	0	0	0	0	0	0	0
B1AQK6;B1AQK7;E9PDR3;F6RH32;Q00975;Q00975-2	0	0	0	0	0	0	0	0	1	0	0
B1AVT0;P49760;P49760-3	0	1	0	0	0	0	0	0	0	1	0
B1AXG1;B4DG22;B7ZB17;P51812	0	0	0	0	0	0	1	0	0	0	0
B2RC85;B2RC85-2;H0YFY2;P0C881	0	0	0	0	0	1	0	0	1	0	0
B2WTI3;B2WTI4;K7EJU9;Q6NYC1;Q6NYC1-2;Q6NYC1-3	0	0	0	0	0	0	1	0	0	0	0
B3EWG3;B3EWG5;B3EWG6	0	0	1	0	0	0	1	0	0	0	0
B3KP42	0	1	0	0	0	0	0	1	0	0	0
B3KP96;H0Y626;J3QKY5;K7EL43;K7ENN8;O95361;O95361-2	0	0	0	0	0	1	0	0	0	0	1
B3KS81	0	0	0	0	0	1	0	0	1	0	0
B3KT41;Q496J9	1	0	0	0	0	0	0	0	0	0	0
B3KTM8;H0YLJ3;Q9UBU8-2	0	1	0	0	0	0	0	0	0	0	0
B3KUS5;Q70CQ3	0	0	0	1	0	0	0	1	0	0	1
B3KVY5;F5GWA4;F5GWK6;F5H268;Q9H3F6;Q9H3F6-2;Q9H3F6-3	0	1	0	0	0	0	0	0	0	1	1
B3KY94;O14735;O14735-3	0	0	0	0	1	0	0	0	0	0	0
B4DDD6	0	0	0	0	0	0	1	0	0	0	0
B4DDF4;B4DUT8;Q99439	0	0	0	0	0	0	1	0	0	0	0
B4DDX3;H7C1L4;Q8TCB7	1	0	0	0	0	0	0	0	0	0	0
B4DEE8;P16455	0	0	0	0	0	0	0	0	0	0	0
B4DEN4;B8ZZ56;E7EV05;E9PFU9;Q8WV99;Q8WV99-2	0	0	0	0	0	0	0	0	0	0	0
B4DFC0;E9PMV6;E9PR50;G3V1B4;H0YD20;H0YE53;H0YEL8;Q9UGK8;Q9UGK8-2	0	0	1	0	0	0	1	0	0	0	0
B4DI03;K7EJQ7;Q9BY50	0	0	0	0	1	0	0	0	0	0	0
B4DJ07	0	0	1	0	0	1	0	0	1	0	0
B4DJ62;C9JM82;E7EPG2;E7EQM7;E7EX32;F8W9E5;G3XAH0;Q99719;Q99719-2	0	1	0	0	0	0	0	0	0	0	0
B4DJV2;O75390	0	0	0	0	0	0	0	1	0	0	0
B4DJV5;Q13610	1	0	0	0	0	0	1	0	0	0	0
B4DK77;Q9H6K4	0	0	0	0	0	0	0	1	0	0	0
B4DL54	0	0	0	0	0	0	1	0	0	0	0
B4DLJ1	0	1	0	0	0	0	0	0	0	0	0
B4DLN1	0	0	0	0	0	0	0	1	0	0	1
B4DLP0;B8ZZF7;O00338;O00338-2	0	0	0	0	0	0	0	0	0	0	0
B4DR61;P61619	0	0	0	0	0	0	0	1	0	0	0
B4DR80;Q9Y6E0;Q9Y6E0-2	0	0	0	0	0	0	0	0	0	0	0
B4DTC4;C9J6H0;C9JAU4;C9JYH7;E7EX82;F8WDA4;G5E9U7;Q8NDX5;Q8NDX5-2;Q8NDX5-3;Q8NDX5-4;Q8NDX5-5;Q8NDX5-6;Q8NDX5-7	0	0	0	0	0	0	1	0	0	0	0
B4DUC8;Q13126	0	0	0	0	0	0	1	0	0	0	0
B4DUJ5;Q8IWP9	0	0	0	0	0	0	0	0	1	0	0
B4DVN3;E7ESC7;Q7L5Y9;Q7L5Y9-3	1	0	0	0	0	0	0	0	0	0	0
B4DVT3;Q96SY0	0	1	0	0	0	0	0	0	0	0	0
B4DXZ6;P51114	0	0	0	0	1	0	0	0	0	0	0
B4DYU2;H3BQV3;Q96MW5	1	0	0	0	0	0	1	0	0	0	0
B4DYY6;Q75T13;Q75T13-2;Q75T13-3	0	0	0	0	1	0	0	1	0	1	0
B4DZK5;Q9HAQ2;Q9HAQ2-2	0	0	0	0	0	0	0	0	1	0	0
B4E0E3;G3V1M5;Q9H6X4;Q9H6X4-2;Q9H6X4-3	0	0	0	0	0	1	0	0	0	0	0
B4E0T2;P50542;P50542-4	0	0	0	1	0	0	0	0	0	0	0
B4E107;F5GXE4;O95260-2	0	0	0	0	0	0	1	0	0	0	0
B4E1G1;Q9BUN8;Q9BUN8-2	0	0	0	0	1	0	0	0	1	0	0
B4E1Q4;O14730	1	0	0	0	0	0	0	0	0	0	0
B4E1Z4	0	0	1	0	1	0	0	0	0	0	0
B4E2Q0;P98194;P98194-4	0	0	0	0	0	0	0	0	1	0	0
B4E3T4;Q93062;Q93062-2;Q93062-3;Q93062-4;Q93062-5	0	1	0	0	0	0	0	0	0	0	0
B5MC20;P0C870	0	0	0	0	0	0	1	0	0	0	0
B5MC22;Q9UDX5	0	0	0	0	0	0	0	1	0	0	0
B5MC35;B5MCA1;B5MD16;Q96G28;Q96G28-2	0	1	0	0	0	0	0	0	0	0	0
B5MC51;P53671-3	0	1	0	0	0	0	0	0	0	0	1
B5MC53;B5MCF8;E7EX18;G5E9F5;P39210	0	0	0	0	0	0	0	1	0	0	0
B5MCF4;C9JDC5;P05230;P05230-2	0	0	0	0	0	0	1	0	0	0	0
B5MCF9;O00541;O00541-2	0	1	0	0	0	0	0	0	0	0	0
B5MCH6	0	0	1	0	0	0	0	0	1	1	0
B5MCN7;Q15788;Q15788-2;Q15788-3	0	0	0	0	0	0	0	0	0	0	0
B5MCQ6;B5MCU6;B5MCV5;E7ETT9;Q96DB2;Q96DB2-2	0	0	0	0	1	0	0	0	0	0	1
B5MCX7;C9JX82;D3YTC9;F8WB76;H7C3L3;Q6NXT1;Q6NXT1-2	0	0	1	0	0	0	0	0	0	0	0
B5MD46;F8W9Y7;F8WCD1;H0Y2U5;H0Y5R9;H7C1Q1;H7C471;Q9BXI6;Q9BXI6-2	0	0	1	0	0	0	0	0	1	1	1
B5MDF5;J3KQE5;P62826	0	0	0	0	0	0	1	0	0	0	0
B5MDL5;P53778;P53778-2	0	0	1	0	0	0	1	0	0	0	0
B5MDU6;Q9H6V9;Q9H6V9-2	0	0	1	0	1	0	0	0	0	0	0
B5ME97;E7EW69;E7EX04;Q9P0V9;Q9P0V9-2;Q9P0V9-3	0	1	0	1	0	0	0	0	0	0	0
B5MEF5;Q8TER0;Q8TER0-3;Q8TER0-4;Q8TER0-5	0	0	0	0	1	0	0	0	0	1	1
B7WNH4;E9PLH2;E9PNA8;E9PP42;M0QYU9;M0R0R3;M0R2G5;Q9BQ49	0	0	0	0	0	0	0	0	1	0	0
B7WNR7;Q5HYL7-4	0	0	0	0	0	0	0	1	0	0	0
B7WP74;Q9HCG8	0	1	0	0	0	0	0	0	0	0	0
B7WPE2;Q32P44	1	0	0	0	0	0	1	0	0	0	0
B7WPG3;C9IYN3;Q8WVV9;Q8WVV9-4;Q8WVV9-5;V9GYK2	0	1	0	0	0	0	0	0	0	0	0
B7WPL0;Q9NVN3;Q9NVN3-1;Q9NVN3-3	0	0	0	0	0	1	0	0	1	0	0
B7WPL9;F8W9A8;Q6PFW1;Q6PFW1-2;Q6PFW1-3;Q6PFW1-4;Q6PFW1-5;Q6PFW1-6;Q6PFW1-7	0	1	0	0	0	0	0	0	0	0	0
B7Z278;Q8WZA2;Q8WZA2-2;Q8WZA2-3;Q8WZA2-4;Q8WZA2-5	0	0	0	0	0	0	0	0	0	0	0
B7Z2R2;P14927;P14927-2	0	0	0	0	0	0	0	1	0	0	0
B7Z2R7;Q5T8D3;Q5T8D3-2;Q5T8D3-3	0	0	0	1	0	0	0	0	0	0	0
B7Z2X5;H0YDC6	0	0	0	0	0	0	0	0	0	0	0
B7Z493;E9PJX4;F8VWL3	0	0	0	0	0	0	0	0	0	0	0
B7Z4L1;B7Z4U3;E7EPD9;E7EPW5;E9PCV1;G3XAH9;H7BXS2;Q9NRC1-2;Q9NRC1-3;Q9NRC1-4;Q9NRC1-5;Q9NRC1-6	0	0	0	0	1	0	0	1	0	0	0
B7Z4S1	1	0	0	0	0	1	0	0	0	0	0
B7Z4W8;E9PD09;Q96HH9;Q96HH9-2;Q96HH9-3;Q96HH9-4;Q96HH9-5	0	0	1	0	0	0	0	0	1	0	0
B7Z5P7;O60711;O60711-2	0	0	1	0	0	0	0	0	0	0	0
B7Z6D5;Q96GQ7	0	1	0	0	0	0	0	0	0	0	0
B7Z6J7;H7C148;O75175	0	0	0	0	0	0	0	0	0	0	0
B7Z6Q0;Q12980	0	0	0	0	0	0	0	0	0	0	0
B7Z7D2;E9PQY3;P11117	0	0	0	0	1	0	0	0	0	1	1
B7Z7P8;P62495;P62495-2	0	0	0	0	0	0	0	0	0	0	0
B7Z8H2;O14717;O14717-2;O14717-3;O14717-4;O14717-5;O14717-6;Q7Z3E4	0	0	0	0	0	0	0	1	0	1	0
B7Z8Q8;Q6NUS8	0	0	0	0	1	0	0	0	0	0	0
B7Z931	1	0	0	0	0	0	0	0	0	0	0
B7Z9C2;F5H4R6;F8VV59;F8VY35;F8W020;F8W0J6;F8W118;F8W543;H0YH88;H0YHC3;H0YIV4;P55209;P55209-2	0	0	0	0	0	0	0	0	0	0	0
B7Z9I1;P11310;P11310-2;Q5T4U5	0	0	0	0	0	0	0	1	0	0	0
B7ZAP0;F5H8L0;Q5R372-5;Q5R372-6;Q5R372-7;Q5R372-8	0	0	0	0	0	0	1	0	0	0	0
B7ZAQ6;B7ZAQ6-2;B7ZAQ6-3;P0CG08	0	0	0	0	1	0	0	0	0	0	0
B7ZBB8	1	0	0	0	0	0	1	0	0	0	0
B7ZBC8;B7ZBC9;O75449	0	0	1	0	0	0	0	0	0	0	0
B7ZC38;Q9NR46	0	0	0	0	0	0	1	0	0	0	0
B7ZKQ9;Q8WTV0-2;Q8WTV0-4	0	0	0	0	1	0	0	0	0	1	1
B7ZL88;Q8N8Q8	0	0	0	0	0	0	0	1	0	0	0
B7ZLQ8;E5RJM0;Q17RY0;Q17RY0-2	0	0	0	0	0	0	0	0	1	0	0
B7ZM68;Q6ZNL6;Q6ZNL6-2	0	0	1	0	0	0	0	0	1	0	0
B8ZZ19;H0Y3U0;P20472	0	0	0	0	0	0	1	0	0	0	0
B8ZZ47;H0Y714;Q96G21	0	1	0	0	0	0	0	0	0	0	0
B8ZZ50;B9A044;C9JEL3;O60573;O60573-2	0	0	1	0	0	0	0	0	0	0	0
B8ZZ98;Q8WVK2	0	1	0	0	0	0	0	0	1	0	0
B8ZZ99;F8WCZ3;Q96NT0;Q96NT0-2	0	0	0	0	1	0	0	0	1	0	0
B8ZZD4;Q86VP1;Q86VP1-2;Q86VP1-3;Q86VP1-4	0	0	0	0	0	0	0	0	0	1	1
B8ZZF5;C9J5M4;Q9H8M9	0	0	0	0	0	0	0	0	0	1	1
B8ZZJ6;H7C1S9;Q8TD22	0	0	0	0	0	0	0	1	0	0	0
B8ZZK5;O43924	0	0	0	0	0	0	0	0	0	0	0
B8ZZQ6;P06454;P06454-2	0	0	0	0	0	0	1	0	0	0	0
B8ZZU8;Q15370;Q15370-2	0	0	0	0	0	0	1	0	0	0	0
B8ZZV9;B8ZZX2;Q9H8M1;Q9H8M1-2	0	0	0	0	0	0	0	1	0	0	0
B8ZZY8	1	0	0	0	0	0	0	0	0	0	0
B8ZZZ1;F8W8K9;G5E966;Q96PC3;Q96PC3-2;Q96PC3-3;Q96PC3-4	0	0	0	0	0	0	0	0	1	0	0
B9A063;Q6PIF6	0	0	0	0	0	0	0	1	1	0	0
B9EGA3;J3KMX2;Q92925;Q92925-2;Q92925-3	0	1	0	0	0	0	0	0	0	0	0
B9EJG8;B9EJG8-2;D6RAQ9;D6RDW6	0	0	0	0	0	0	0	0	1	0	0
B9ZVN9;O95602	0	1	0	0	0	0	0	0	0	0	1
C4AMC7;Q6VEQ5	0	0	0	0	0	1	0	0	1	0	0
C4B7M2;Q96JI7;Q96JI7-2;Q96JI7-3	0	0	1	0	0	0	0	0	1	0	0
C4P0D6;C4P0D8;Q99598	0	0	0	0	0	0	1	0	0	0	0
C9IYN7;C9J2D6;C9J9N8;C9JA82;C9JEX8;C9JLH5;Q0PNE2;Q0PNE2-2	1	0	0	0	0	0	0	0	0	0	0
C9IYT0	0	1	0	0	0	0	0	0	1	0	0
C9IZ93;C9J9P8;C9JF62;Q969M7;Q969M7-2;Q969M7-3;Q969M7-7	0	0	0	0	0	0	0	0	0	0	0
C9IZF6;P41247	0	0	0	0	0	0	0	1	0	0	0
C9IZU8;C9J9T0;Q96AT9	0	0	0	0	0	0	1	0	0	0	0
C9J050;C9JEJ2;P49585	0	0	1	0	0	0	0	0	0	0	0
C9J066;E9PN67;Q8N4C6;Q8N4C6-10;Q8N4C6-11;Q8N4C6-2;Q8N4C6-4;Q8N4C6-5;Q8N4C6-6;Q8N4C6-7;Q8N4C6-9	0	0	1	0	0	0	0	0	0	0	0
C9J0A4;P57723;P57723-2	0	0	0	0	0	0	0	0	1	1	0
C9J0A7;Q9UQN3;Q9UQN3-2	0	0	0	0	0	0	1	0	0	0	0
C9J0I9;Q86WB0;Q86WB0-2;Q86WB0-3	0	1	0	1	0	0	0	0	0	0	0
C9J0J0;Q96EE4	0	0	0	0	0	0	0	0	1	0	0
C9J0J7;G5E9Q6;P35080-2	0	0	0	0	0	0	1	0	0	0	0
C9J0K6;P30626;P30626-2;P30626-3	0	0	0	0	0	0	1	0	0	0	0
C9J159;F5H6W4;Q9H992	0	0	0	0	0	0	0	0	0	0	0
C9J165	1	0	0	0	0	0	0	0	1	0	0
C9J1C6;Q9P0P0	1	0	0	0	0	0	1	0	0	0	0
C9J2C0;Q9NY65;Q9NY65-2	0	0	0	0	0	0	0	0	0	0	0
C9J2P9;Q75N03;Q75N03-2	0	0	0	0	0	0	0	0	0	1	1
C9J2Y9;P30876	0	1	0	0	0	0	0	0	0	0	0
C9J365;C9JA28;Q9UNL2;Q9UNL2-2	0	0	0	0	0	0	0	0	1	0	1
C9J3D7;Q9UKG9;Q9UKG9-3	0	0	0	1	0	0	0	0	0	0	0
C9J3R8;E7ETS9;O60513	0	0	0	0	0	0	0	0	1	0	0
C9J406	0	0	0	0	0	0	0	1	0	0	0
C9J494;Q9H000;Q9H000-2	0	0	0	0	0	0	0	0	0	0	0
C9J4X5;Q96EU6;Q96EU6-2;Q9H160;Q9H160-2	0	1	0	0	0	0	0	0	0	0	0
C9J4Z3;P61513	0	0	0	0	0	0	0	1	0	0	0
C9J555;J3QLM1;J3QLS1;Q14849	1	0	0	0	0	0	0	0	0	0	0
C9J597;C9JF31;Q9BV87	1	1	0	0	0	0	0	0	0	0	0
C9J5D1;E7EQ69;Q9GZZ1	0	0	0	0	0	1	0	0	1	0	0
C9J5N1;Q9BTE6;Q9BTE6-2;Q9BTE6-3	0	0	0	0	0	0	1	0	0	0	0
C9J6G3;C9J7M1;O95749	1	0	0	0	0	0	1	0	0	0	0
C9J6K0;Q13103	0	0	1	0	0	0	0	0	0	1	0
C9J6K3;C9JM54;Q9HC52	0	1	0	0	0	0	0	0	0	0	0
C9J6P4;Q7Z2W4	0	0	0	1	0	0	0	0	0	0	0
C9J6W0	0	0	1	0	0	0	0	0	1	0	0
C9J712;P35080	1	0	0	0	0	0	1	0	0	0	0
C9J758;Q969T7;Q969T7-2	0	0	0	0	0	0	1	0	0	0	0
C9J798;E5RK78;E7ERK1;F5GXT2;F8W6L0;O43374;O43374-2	0	1	0	0	0	0	0	0	0	0	0
C9J7E5;Q9Y5L0;Q9Y5L0-1	0	0	0	0	0	0	1	0	0	0	0
C9J7E8;Q9UL63;Q9UL63-2	1	0	0	0	0	0	0	0	0	0	0
C9J7K9;C9J9P4;H7C5I5;O15162;O15162-2	0	0	0	0	1	0	0	0	0	0	1
C9J813	0	1	0	0	0	0	0	0	0	0	0
C9J8S2;Q99969	0	0	0	0	1	0	0	0	0	0	0
C9J8T4;C9JYN7;O43567	0	0	0	0	0	0	0	0	1	1	0
C9J975;E7ESL9;Q96P47;Q96P47-2;Q96P47-3;Q96P47-4;Q96P47-6	1	0	1	0	0	0	0	0	0	0	0
C9JA08;Q96D46	1	1	0	0	0	0	0	0	0	0	0
C9JA90	0	0	0	0	0	0	0	0	1	0	0
C9JAX1;Q16595	0	0	0	0	0	0	0	1	0	0	0
C9JB28;C9JPS5;Q6ZMH5	0	0	0	0	1	0	0	0	0	0	1
C9JB30;Q9UPY8	0	0	0	0	0	0	1	0	0	0	0
C9JBG5;E9PMC3;F5H8L4;Q8NBJ9;Q8NBJ9-2	0	0	0	0	0	1	0	0	0	0	0
C9JBI3;P78330	0	0	0	0	0	0	1	0	0	0	0
C9JBY7;Q9Y291	0	0	0	0	0	0	0	1	0	0	0
C9JCC6;E9PQX9;Q14919;Q14919-2	0	1	0	0	0	0	0	0	0	0	0
C9JCU6;F2Z2B3;F8WCP4;Q12851;Q12851-2	1	1	0	0	0	0	0	0	0	0	0
C9JD37	0	0	0	0	0	0	0	1	0	0	0
C9JDZ2;Q9NVQ4;Q9NVQ4-2;Q9NVQ4-3	0	0	1	0	0	0	0	0	0	0	0
C9JEG3;Q9UBQ6	0	0	0	0	0	0	0	0	1	0	0
C9JEG4;H7BZE4;H7C482;Q01449	0	0	0	0	0	1	0	0	1	0	0
C9JEH3;C9JG97;Q13685	0	0	0	0	0	0	1	0	0	0	0
C9JEK0;C9JP86;Q08AI8	1	0	0	0	0	0	0	0	0	0	0
C9JER6;P61366	0	0	1	0	0	0	0	0	0	1	1
C9JF50;E9PLU1;E9PRK5;E9PRW1;E9PSD6;Q9H019;Q9H019-2;Q9H019-3	0	0	0	0	1	0	0	0	0	1	0
C9JFE4;Q13098;Q13098-5;Q13098-7	1	0	0	0	0	0	1	0	0	0	0
C9JFR7;P99999	0	0	0	1	0	0	0	1	0	0	0
C9JFV4;Q8IZL8	0	1	0	0	0	0	0	0	0	0	0
C9JFX4;E9PLG6;E9PSD9;Q6IA17;Q6IA17-2	0	0	0	0	0	1	0	0	0	0	0
C9JG87;Q9NYK5;Q9NYK5-2	0	0	0	0	0	0	0	1	0	0	0
C9JH00;O75155;O75155-2	1	0	0	0	0	0	0	0	0	0	0
C9JHD7;C9JJK9;Q86YP4;Q86YP4-2;Q86YP4-3	0	1	0	0	0	0	0	0	0	0	0
C9JIF9;P13798	1	0	0	0	0	0	1	0	0	0	0
C9JIT1	0	0	1	0	0	1	0	0	1	1	0
C9JIZ6;P07602;P07602-2;P07602-3	0	0	0	0	1	0	0	0	0	0	0
C9JJ19;P82930	0	0	0	0	0	0	0	1	0	0	0
C9JJM2;Q96MV1;S4R434	0	0	0	0	1	0	0	0	1	0	0
C9JJN9;Q8N3P4;Q8N3P4-2;Q8N3P4-3	1	0	0	0	0	1	0	0	0	0	0
C9JJT5;G3V325;P56134-2;P56134-4	0	0	0	0	0	0	0	1	0	0	0
C9JJX6;E9PDC3;O00192;O00192-2	0	0	0	0	0	0	0	1	0	1	1
C9JK83;O95630;O95630-2	1	0	0	0	0	0	1	0	0	0	0
C9JKL2;C9JPX5;O95772;O95772-2	0	0	1	0	0	0	0	0	1	1	1
C9JLB7;Q96HP4;U3KQU8	0	0	0	0	0	0	0	1	0	0	0
C9JLU1;P52434;P52434-4	0	1	0	0	0	0	1	0	0	0	0
C9JLW8;I3L2L5;I3L4Q0	1	0	0	0	0	1	0	0	0	0	0
C9JNE2;Q9Y530	0	1	0	0	0	0	0	0	0	0	0
C9JNW5;C9JXB8;P83731	0	0	0	0	1	0	0	1	0	0	0
C9JNZ0;C9JRY4;Q96IW7	0	0	1	0	0	0	0	0	1	1	0
C9JP16;O75718	0	0	0	0	1	0	0	0	0	0	0
C9JP85;Q16656;Q16656-2;Q16656-4	0	1	0	0	0	0	0	0	0	0	0
C9JPG5;Q13275;Q13275-2	0	0	1	0	0	0	0	0	0	0	0
C9JQ41;H7C525;Q4VC31	0	0	0	1	0	0	0	1	0	0	0
C9JQ48;E2QRF5;Q9H8U3	0	1	0	0	0	0	0	1	0	0	0
C9JQ60	0	0	0	0	0	0	0	0	0	0	0
C9JQD4;O43447	0	1	0	0	0	0	0	0	0	0	0
C9JQI7;C9JQI7-2;D6RC30	0	0	0	0	1	0	0	0	0	1	1
C9JQS9;E7ETT1;E7ETT4;E7EX59;E9PDR0;P05166;P05166-2	0	0	0	0	0	0	0	1	0	0	0
C9JQV0;H7C0T1;H7C2R9;Q9BRJ6	0	0	0	0	1	0	0	0	0	0	0
C9JR56	0	0	0	0	0	0	0	1	0	0	1
C9JRD2;P25686;P25686-2	0	0	0	0	0	0	1	0	0	0	0
C9JRZ6;Q9NX63	0	0	0	0	0	0	0	1	0	0	0
C9JS50;Q687X5	0	0	0	0	0	0	0	0	0	0	0
C9JSU1;Q9Y608;Q9Y608-2;Q9Y608-4;Q9Y608-5	0	1	0	0	0	0	0	0	0	0	0
C9JUQ8	1	0	1	0	0	0	0	0	0	0	0
C9JW74;C9JWU9;Q5EB52;Q5EB52-2;Q5EB52-3	0	0	0	0	0	0	0	1	0	0	0
C9JXM5;G5E9W1;Q7Z3E1	0	0	0	0	1	0	0	0	0	1	0
C9JY79;M0QZQ3;Q9H254;Q9H254-4	0	1	0	0	0	0	0	0	0	1	1
C9JYJ6;Q4L180-3;Q4L180-5;Q4L180-7	0	0	0	0	0	0	0	1	0	0	0
C9JYM0;O75817	0	0	0	0	1	0	0	0	0	0	0
C9JYS5;J3KS67;J3QL47;J3QL63;K7ENL4;Q96ET8-3;Q9NYZ1	0	0	0	0	0	0	0	0	1	0	0
C9JZ38	0	0	0	0	0	0	0	0	0	0	0
C9JZB3;Q16821	0	0	1	0	0	0	0	1	0	0	1
C9JZF7;G5E9W2;Q9P2E5;Q9P2E5-2	0	0	0	0	0	0	0	0	1	0	0
C9JZG9;C9JZY6;P62256	0	0	0	0	0	0	1	0	0	0	0
C9JZI1;P35249;P35249-2	0	1	0	0	0	0	0	0	0	0	1
C9JZI7	0	0	0	0	0	0	1	0	0	0	0
C9JZR2;O60716;O60716-10;O60716-11;O60716-13;O60716-2;O60716-3;O60716-5;O60716-9	0	0	0	0	0	0	0	0	0	1	1
C9K058;Q9H2H8	0	0	0	0	0	0	1	0	0	0	0
C9K0C8;Q9NS00;Q9NS00-2	0	0	0	0	0	0	0	0	1	0	0
C9K0I9	0	1	0	0	0	0	0	0	0	1	1
D3DQV9;H0Y3P2;P78344;P78344-2	1	0	0	0	0	1	0	0	0	0	0
D3DUJ3;K7EIE9;K7EQG9;P17706;P17706-2;P17706-3;P17706-4	0	0	0	0	0	1	0	0	0	0	0
D3DWX8;P98173;P98173-2;P98173-3;Q5HY75	0	0	0	0	1	0	0	0	1	0	0
D3YTA9;F6U1T9;P63098	0	0	0	0	0	0	1	0	0	0	0
D3YTC7;Q9UBM1;Q9UBM1-2;Q9UBM1-3	0	0	0	0	0	0	0	0	0	0	0
D5H3J5;Q2L6G2	0	1	0	0	0	0	0	0	0	1	1
D6R927;D6R946;D6R9K5;D6R9X3;D6RA45;D6RAT2;D6RB37;D6RBQ8;D6RCM1;D6REC2;D6REP3;D6RF98;D6RIV8;D6RIZ8;Q06330;Q06330-4;Q06330-5;Q06330-6;Q06330-7	0	1	0	0	0	0	0	0	0	0	0
D6R938;Q13557;Q13557-10;Q13557-11;Q13557-12;Q13557-3;Q13557-4;Q13557-5;Q13557-6;Q13557-8;Q13557-9	1	0	0	0	0	0	0	0	0	0	0
D6R9C3;H0UI06;P14406	0	0	0	0	0	0	0	1	0	0	0
D6R9C7	0	0	0	0	0	0	0	0	1	0	0
D6R9P3	0	1	0	0	0	0	0	0	0	0	0
D6R9P8;Q6AWC2;Q6AWC2-4;Q6AWC2-6	1	0	0	0	0	0	0	0	0	0	0
D6R9S2;D6RIC1;H0Y8L2;H0YEZ3;H0YJP6;P59282	0	0	0	0	0	1	1	0	0	0	0
D6R9S7;D6RDB0;D6RHE3;Q96GZ6;Q96GZ6-2;Q96GZ6-5;Q96GZ6-6;Q96GZ6-7;Q96GZ6-9	0	1	0	0	0	0	0	0	1	0	0
D6R9Z7;P15954	0	0	0	0	0	0	0	1	0	0	0
D6RA47;D6RE79;D6RIZ4;Q14728	0	0	0	0	1	0	0	0	0	0	0
D6RA57;D6RC31;D6RE67;H0Y9X1;Q96EY4	0	1	0	0	0	0	0	0	0	0	1
D6RA82;P12429	0	0	0	0	0	0	1	0	0	0	0
D6RA96;Q9NZ71;Q9NZ71-2;Q9NZ71-4;Q9NZ71-6;Q9NZ71-7;Q9NZ71-8;X6R5I7	0	0	0	0	0	0	0	0	0	0	0
D6RAC8;Q9NQ76;Q9NQ76-2;Q9NQ76-3	0	1	0	0	0	0	0	0	1	0	0
D6RAD4;P50613	0	1	0	0	0	0	0	0	0	0	0
D6RAD5	0	0	0	0	0	0	0	1	0	0	0
D6RAJ6;Q9UKT5;Q9UKT5-2	0	0	0	0	0	0	1	0	0	0	0
D6RAN1;D6RF83;D6RH06;H7BYK4;Q9NR12;Q9NR12-2;Q9NR12-3;Q9NR12-4;Q9NR12-5;Q9NR12-6	0	1	0	0	0	0	0	0	0	0	1
D6RAN8;H7C5U8;Q9P0M9	0	0	0	0	0	0	0	1	0	0	0
D6RAR4;Q04756	0	0	0	0	0	0	0	0	0	0	0
D6RAZ3;E7EMP6;Q96FZ2	0	0	1	0	0	0	0	0	0	0	0
D6RB81;Q9UHK6;Q9UHK6-5	0	0	0	1	0	0	0	0	0	0	0
D6RB89;P50120	0	0	0	0	0	0	1	0	0	0	0
D6RBM8	0	0	1	0	0	0	0	1	0	0	0
D6RBN6	0	0	0	0	0	1	0	0	0	1	0
D6RBR7;Q9Y3S2	0	0	0	0	0	1	0	0	1	0	0
D6RBW1;P06730;P06730-2;P06730-3	0	0	0	0	0	0	0	0	0	0	0
D6RBY0;D6RJG8;Q8TAC1;Q8TAC1-2	0	0	1	0	0	0	0	0	0	0	0
D6RCC4;D6RCC9;Q8NEC7	0	0	0	0	0	0	1	0	0	0	0
D6RCE7	0	1	0	0	0	0	0	0	0	0	0
D6RCM8;O95379;O95379-2;O95379-3;O95379-4	0	0	1	0	0	0	0	0	0	0	0
D6RCP5;Q8N264;Q8N264-2;Q8N264-3	0	0	0	0	0	0	0	1	0	0	0
D6RDG3	0	0	1	0	1	0	0	0	1	0	0
D6RDG8;D6RGZ4;O43791	0	1	0	0	0	0	0	1	0	0	1
D6RDK6	0	0	0	0	0	0	0	0	0	1	1
D6RE84	0	0	0	0	0	0	0	0	0	0	0
D6REA0;O75879	0	0	0	0	0	0	0	1	0	0	0
D6REK2;H0Y9T3;Q8WV44;Q8WV44-2;Q8WV44-4	0	1	0	0	0	0	0	0	0	0	0
D6RER5;D6RGI3;Q9NVA2	0	0	0	0	0	0	0	0	0	0	0
D6REX3	1	0	0	0	0	1	0	0	0	0	0
D6REY2;P23508;P23508-2	0	0	0	0	0	0	1	0	0	0	0
D6RF35;P02774;P02774-3	0	0	1	0	1	0	0	0	0	0	0
D6RF43	0	0	1	0	0	0	0	0	1	1	0
D6RF48;Q9P2W9	0	0	0	0	1	0	0	0	0	0	0
D6RF86;P55285;P55285-2	0	0	0	0	0	0	0	0	0	1	0
D6RFG8;P27707	0	0	0	0	0	0	0	0	0	0	0
D6RFI1	0	1	0	0	0	0	0	0	0	0	0
D6RFI3;E7EQR8;Q9GZM5	0	0	0	0	0	1	0	0	1	0	0
D6RGG3;Q99715;Q99715-4	0	1	0	0	0	0	0	1	0	1	0
D6RGK3;D6RHW1;D6RIE8;D6RIV9;D6RIY1;Q16594;Q9HBM6	0	1	0	0	0	0	0	0	0	0	0
D6RGK9;H0Y9C1;H0Y9Z5;Q96LI5	0	0	0	0	0	0	0	0	0	1	0
D6RGZ3;Q8N1W1;Q8N1W1-3;Q8N1W1-4;Q8N1W1-5;Q8N1W1-6	0	1	0	0	0	0	0	1	0	1	0
D6RH21	0	0	0	0	0	0	0	0	1	0	0
D6RHG0;P78383	0	0	0	0	1	0	0	0	0	0	0
D6RHH9;Q8TCT1;Q8TCT1-2;Q8TCT1-3	0	0	0	0	0	0	1	0	0	0	0
D6RHX8;F8W9W2;P43250;P43250-2;P43250-3	0	1	0	0	0	0	0	0	0	0	1
D6RID8;Q13888;Q6P1K8	0	1	0	0	0	0	0	0	0	0	1
D6RIE3	0	0	0	0	0	0	0	1	0	0	0
D6RIG4;Q9HCL0;Q9HCL0-2	0	0	0	1	0	0	0	0	0	0	0
D6RIT3;Q8N1A6	0	0	0	0	0	0	1	0	0	0	0
D6RIY6;Q06265;Q06265-2	0	1	0	0	0	0	0	0	0	0	0
D6RJ90;Q9Y6G5	0	0	0	0	0	1	0	0	1	0	0
D6RJG9;Q9Y5W7;Q9Y5W7-2;Q9Y5W7-3;Q9Y5W7-4	0	0	0	0	1	0	0	0	0	0	1
E1CKY7;O60237;O60237-4;O60237-6	0	0	0	0	0	0	0	1	0	0	0
E2QRG8	0	0	0	0	0	0	0	0	0	0	0
E2QRK7;Q5JTD0;Q5JTD0-2	0	0	0	0	0	1	0	0	1	0	0
E3W980;E3W982;Q8TDG4	0	0	0	0	0	0	0	0	0	1	0
E5KLJ9;O60313-10;O60313-2;O60313-9	0	0	0	1	0	0	0	1	0	0	0
E5RFE0;E5RGT8;Q9UQ10	0	0	0	0	0	0	1	0	0	0	0
E5RFF8;J3KNU2;Q8IX29;Q8IX29-2	0	0	0	0	0	0	0	1	0	0	0
E5RFT4;Q8N4L2	0	0	1	0	0	0	0	0	0	0	0
E5RFV7;O00300	0	0	0	0	0	0	0	1	0	0	0
E5RFX7	0	0	1	0	0	0	0	0	0	0	1
E5RG15;E5RHB3;Q8NBP0;Q8NBP0-2	0	1	0	0	0	0	0	0	0	0	1
E5RG17;G5EA19;H0YBX2;Q6P1N9;U3KQS5	0	0	0	0	0	0	1	0	0	0	0
E5RG29	0	0	0	0	1	0	0	0	0	1	0
E5RG44;E5RGJ1;E5RIT1;Q629K1	0	0	0	0	1	0	0	0	0	0	0
E5RGB7;E5RGH1;H0YBV9;Q7Z388	0	0	1	0	0	0	0	0	0	1	0
E5RGU4	0	0	0	0	0	0	0	0	0	0	0
E5RGZ2;H0YKJ1;Q6NT76;Q6NT76-2;Q6NT76-3;Q6NT76-5	0	0	0	0	0	0	0	1	0	0	0
E5RHC5;Q8N6T3;Q8N6T3-3	0	0	1	0	0	0	1	0	0	0	0
E5RHG8;Q15369	0	0	0	0	0	0	1	0	0	0	0
E5RHW4;O94905	0	0	1	0	1	0	0	0	0	0	0
E5RIA2;E7EUF1;Q13822;Q13822-2;Q13822-3	0	0	0	0	0	0	0	0	1	1	0
E5RIA9;Q9UJ68;Q9UJ68-5	0	0	0	0	0	0	1	0	0	0	0
E5RIH5;Q6NXR4	1	0	0	0	0	0	0	0	0	0	0
E5RIK6	0	0	1	0	0	0	0	0	1	0	0
E5RIT6;Q9UNX3	0	0	0	0	0	0	0	1	0	0	0
E5RIW3;E5RJD8;O75347	0	0	0	0	0	0	1	0	0	0	0
E5RIW9;P28328	0	0	0	0	0	0	0	0	0	1	1
E5RJ29;Q9NYI0;Q9NYI0-2	0	0	0	0	0	0	0	1	0	1	1
E5RJ36;H0YAX6;Q14CS0	0	0	0	0	0	0	0	0	0	0	0
E5RJF8;E5RK82;O15182	0	1	0	0	0	0	0	0	0	1	0
E5RJN7;E7EPX0;E7EVI1;E7EVJ4;Q9NUL3;Q9NUL3-2;Q9NUL3-3;Q9NUL3-6;Q9NUL3-7;Q9NUL3-8	0	0	0	0	1	0	0	0	0	1	0
E5RK69	0	0	1	0	0	0	1	0	0	0	0
E7EM64;Q7L5N1	0	0	0	0	0	0	0	0	0	0	0
E7EM72;E7EWQ4;O75912	1	0	0	0	0	0	0	0	0	0	0
E7EMB1;Q9UH65	0	0	0	0	0	0	1	0	0	0	0
E7EMC7;Q13501	0	0	0	0	0	0	0	0	0	0	1
E7EMD6;O43572	0	0	0	0	0	0	0	0	1	0	0
E7EMK3;J3QLD9;Q14254	0	0	0	0	0	0	0	0	0	1	1
E7EMS2;G3V3D1;G3V3E8;J3KMY5;P61916	0	0	1	0	0	0	0	0	0	1	1
E7EMT5;P04798	0	0	0	0	1	0	0	0	1	0	0
E7EMT6;E7ENY2;E7EQA9;E7EV32;E7EVA2;E7EW82;H7C3L4;Q92844	1	0	0	0	0	0	0	0	0	0	0
E7EMZ9;E9PBC6;O95359;O95359-3	0	0	0	0	0	0	0	0	0	0	0
E7EN01;Q16602	0	0	0	0	0	0	0	0	1	0	0
E7EN24;Q12864	0	0	0	0	0	0	0	0	1	1	1
E7EN73;Q8IZA0;Q8IZA0-2	0	0	0	0	1	0	0	0	1	0	0
E7EN91;Q9BWF2	1	0	0	0	0	0	1	0	0	0	0
E7END6;P04070;P04070-2	0	0	0	0	1	0	0	0	0	0	0
E7ENL6;P12111;P12111-2;P12111-4	0	1	0	0	0	0	0	0	0	0	0
E7ENT5;E7EV45;Q9ULF5	0	0	1	0	0	0	0	0	0	1	1
E7ENV7	0	0	0	0	0	0	0	0	0	1	0
E7ENY0;E7EV99;P35611;P35611-2;P35611-3;P35611-6	0	1	0	0	0	0	0	0	0	0	0
E7EP17;Q9NYC9;Q9NYC9-2	0	0	0	0	0	0	0	0	0	0	0
E7EP72;Q9UFG5	0	0	0	0	1	0	0	0	1	0	0
E7EPB3;P50914	0	0	0	0	1	0	0	1	0	0	0
E7EPG1;Q13201	0	1	0	0	0	0	0	0	0	0	1
E7EPI0;Q9P2D0	0	0	0	0	1	0	0	0	0	1	1
E7EPK1;E7ES33;Q16181;Q16181-2	0	1	0	0	0	0	0	0	0	0	0
E7EPN9;Q9Y520;Q9Y520-4;Q9Y520-5;Q9Y520-6;Q9Y520-7	0	0	0	0	0	0	0	0	0	0	0
E7EPS8;P28827;P28827-2	0	1	0	0	0	0	0	0	0	0	0
E7EPT4;P19404	0	0	0	0	0	0	0	1	0	0	0
E7EQB2;E7ER44;P02788;P02788-2	0	0	0	1	0	0	0	0	0	1	1
E7EQH1;E9PMB7;E9PR55;Q8NFJ9;Q8NFJ9-2;Q8NFJ9-3	0	1	0	0	0	0	0	1	0	0	0
E7EQM8;J3QRM6;J3QS93;P43146	0	0	0	0	0	0	0	0	1	0	0
E7EQQ5;Q9C035;Q9C035-2;Q9C035-3;Q9C035-4;Q9C035-5;Q9C035-6	1	0	0	0	0	0	1	0	0	0	0
E7EQT3;Q9BY07-5	0	0	0	0	0	0	1	0	0	0	0
E7EQT4;Q9UKV3;S4R3H4	0	1	0	0	0	0	0	0	0	0	0
E7EQU1;E7ES08;E9PES6;O15347	0	1	0	0	0	0	0	0	0	0	0
E7EQY1;Q96C01	0	0	0	1	0	0	0	1	0	0	0
E7ER45;O43451	0	0	0	0	0	0	0	0	0	1	1
E7ER77;Q7Z2K6	0	0	0	0	1	0	0	0	0	0	0
E7ERI8;E7EW49;O75122-3	0	0	0	0	0	0	0	0	0	0	0
E7ERS3;Q86VM9	0	1	0	0	0	0	0	0	0	0	1
E7ES84;P50748	0	0	1	0	0	0	0	0	0	1	0
E7ES96;P49768;P49768-2	0	0	1	0	0	0	0	0	0	0	0
E7ESA6;H0YBP1;Q05397;Q05397-7	0	0	0	0	0	0	0	0	0	0	0
E7ESA7;P29474	0	0	1	0	0	0	0	0	0	0	1
E7ESC6;Q9UIA9	0	0	0	0	0	0	1	0	0	0	0
E7ESD2;Q641Q2;Q641Q2-2	0	0	0	0	0	1	0	0	1	0	0
E7ESF6;Q13094	0	1	0	0	0	0	0	1	0	0	0
E7ESK6;E9PBI9;P34741	0	0	0	0	1	0	0	0	0	0	1
E7ESL0;J3KQY1;Q9NWU5;Q9NWU5-2;Q9NWU5-3	0	0	0	0	0	0	0	1	0	0	0
E7ESP4;P17301	0	1	0	0	0	0	0	1	1	0	0
E7ESS3;K7EKW3;Q71RG4;Q71RG4-2	0	0	0	0	1	0	0	0	1	0	0
E7ESU7	0	0	1	0	0	0	0	0	0	0	0
E7ESY4;H0Y4T7;Q13330;Q13330-3	0	1	0	0	0	0	0	0	0	0	1
E7ET49;Q8NCG7;Q8NCG7-2;Q8NCG7-4	0	0	0	0	0	1	0	0	0	0	0
E7ET87;E7EVI4;O75410;O75410-10;O75410-2;O75410-3;O75410-4;O75410-5;O75410-6;O75410-7;O75410-9	0	0	0	0	0	0	0	0	0	0	0
E7ETB3	1	0	0	0	0	0	0	0	0	0	0
E7ETH0;G3XAM2;P05156	0	0	1	0	1	0	0	0	0	0	0
E7ETM6;Q8N2H4	0	0	0	0	0	0	0	0	1	0	0
E7ETU5;F6Y5H0;P29558;P29558-2	0	0	1	0	0	0	0	0	0	1	0
E7ETU7;H0Y9G6;P09001	0	0	0	0	0	0	0	1	0	0	0
E7ETY4;E9PC69;Q7KZI7;Q7KZI7-10;Q7KZI7-11;Q7KZI7-12;Q7KZI7-13;Q7KZI7-14;Q7KZI7-15;Q7KZI7-16;Q7KZI7-2;Q7KZI7-3;Q7KZI7-4;Q7KZI7-5;Q7KZI7-6;Q7KZI7-7;Q7KZI7-8;Q7KZI7-9	0	0	0	0	0	0	0	0	0	0	0
E7ETZ4;Q9Y6E2	0	0	0	0	0	1	0	0	0	0	0
E7EU05;E9PLT1;P16671;P16671-3	0	0	0	0	1	0	0	0	0	1	1
E7EU13;Q96P48;Q96P48-1;Q96P48-2;Q96P48-3;Q96P48-4	0	0	0	0	0	0	1	0	0	0	0
E7EU14	0	0	0	0	0	0	1	0	0	0	0
E7EUH7;Q96PZ0;Q96PZ0-2	0	0	0	0	0	0	1	0	0	0	0
E7EUJ7;Q8TC20;Q8TC20-2;Q8TC20-3;Q8TC20-5	0	1	0	0	0	0	0	0	0	0	0
E7EUU4;Q04637-8	0	0	0	0	0	1	0	0	0	0	0
E7EUW0;H0YA74;Q9C0I3;Q9C0I3-2	0	0	1	0	0	0	0	0	1	0	0
E7EV01;O15484	0	0	0	0	0	0	0	0	0	1	1
E7EV71;Q14766;Q14766-2;Q14766-4;Q14766-5	0	1	0	0	0	0	0	0	0	0	1
E7EVA0	0	0	0	0	0	0	1	0	0	0	0
E7EVC7;Q676U5;Q676U5-2	0	0	0	0	0	0	1	0	0	0	0
E7EVE9;P18074	0	1	0	0	0	0	0	0	0	0	0
E7EVH7;F8W6L3;G3V2E7;G3V3H3;G3V5R9;Q07866;Q07866-10;Q07866-2;Q07866-3;Q07866-4;Q07866-5;Q07866-6;Q07866-7;Q07866-8;Q07866-9	0	0	0	0	0	0	1	0	0	0	0
E7EVJ5;Q96F07;Q96F07-2	0	0	0	0	0	1	0	0	1	0	0
E7EVM0;H0YBR7;H0YBY1;P01266;P01266-2	0	1	0	0	0	0	0	0	0	0	1
E7EVQ6;Q14534	0	0	0	0	1	0	0	0	0	0	0
E7EVX8;Q8WWY3	0	1	0	0	0	0	0	0	0	0	0
E7EVZ1;Q86UP3;Q86UP3-2;Q86UP3-4;Q86UP3-5	0	1	0	0	0	0	0	0	0	0	1
E7EW05;Q9NVU7;Q9NVU7-2	0	1	0	0	0	0	0	0	0	0	1
E7EWD3;O75077;O75077-2	0	0	0	0	1	0	0	0	0	0	1
E7EWM1;Q15596	0	0	1	0	0	0	0	0	1	0	0
E7EWP0;H0Y886;O43674;O43674-2	0	0	0	1	0	0	0	1	0	0	0
E7EWR4;P33240;P33240-2	0	1	0	0	0	0	0	0	0	0	0
E7EWW0;Q7Z3J2	0	0	0	0	0	1	0	0	0	0	0
E7EWX8	0	0	1	0	0	0	0	0	0	1	1
E7EX17;P23588	1	0	0	0	0	1	0	0	0	0	0
E7EX40;Q6WKZ4;Q6WKZ4-2;Q6WKZ4-3	0	0	0	0	0	0	1	0	0	0	0
E7EX44;Q05682-2;Q05682-3;Q05682-6	0	1	0	1	0	0	0	0	0	0	0
E7EX70;Q9GZS1	0	1	0	0	0	0	0	0	0	0	0
E7EX90;Q14203;Q14203-3;Q14203-4;Q14203-6	1	0	0	0	0	1	0	0	0	0	0
E9PAM5	1	1	0	0	0	0	0	0	0	0	0
E9PAV3;E9PAV3-2;F8VZJ2;F8W0W4;H0YHX9;Q13765	0	0	0	0	0	1	0	0	0	0	0
E9PB18;Q6UXG2;Q6UXG2-2;Q6UXG2-3;Q6UXG2-4	0	0	0	0	0	0	0	0	0	0	0
E9PB51;Q9BWF3	0	1	0	0	0	0	0	0	0	0	0
E9PB61;Q86V81	0	1	0	0	0	0	0	0	0	0	0
E9PB90;P52789	0	0	1	0	0	0	0	0	0	0	0
E9PBC1;F6PQP6;I3L2B2;I3L2H1;I3L356;O95208;O95208-2;O95208-3;O95208-5	0	0	0	0	0	0	0	0	0	0	1
E9PBF9;H7C2N6;P15336	0	0	0	0	0	0	1	0	1	0	0
E9PBP6	0	0	0	0	0	0	0	0	0	0	1
E9PBZ2;P15428;P15428-2;P15428-4	0	0	0	0	0	0	1	0	0	0	0
E9PC53;H7C3N0;Q8TBK2;Q8TBK2-2	0	0	0	0	0	0	1	0	0	0	0
E9PC61;G4U4J3;Q8NDF8;Q8NDF8-2;Q8NDF8-3;Q8NDF8-5	0	1	0	0	0	0	0	0	0	0	0
E9PC66;P17029	0	1	0	0	0	0	0	0	0	0	0
E9PC87;O94876;O94876-2	0	0	0	0	1	0	0	0	0	0	0
E9PC90;H0YA62;P14635;P14635-2	0	0	0	0	0	0	0	0	0	1	1
E9PCD7;H0YA68;Q9Y2E5;Q9Y2E5-2	0	0	0	0	0	0	0	0	0	0	0
E9PCJ7;G3V336;Q8N806	0	0	1	0	0	0	0	0	0	0	0
E9PCN2;Q02153;Q02153-2	0	0	0	0	0	0	1	0	0	0	0
E9PCP0;F5H0S8;F5H100;F5H8J8;P16520;P16520-2	0	0	1	0	0	0	0	0	0	0	0
E9PCQ7;F8WD67;F8WD87;O43709;O43709-2;O43709-3	0	0	0	0	0	0	0	0	1	0	0
E9PCW1;G5E9T8;K7EJC8;O95249	0	0	0	0	0	1	0	0	1	0	0
E9PCX2;P15121	0	0	0	0	0	0	1	0	0	0	0
E9PCX5	0	0	0	0	0	0	0	1	1	0	0
E9PD50;Q92540;Q92540-2;Q92540-4	1	0	0	0	0	0	0	0	0	0	0
E9PD53;Q9NTJ3;Q9NTJ3-2	0	0	0	1	0	0	0	1	0	0	0
E9PD68;Q14194;Q14194-2	1	0	0	0	0	0	0	0	0	0	0
E9PD72	0	0	1	0	0	0	0	0	1	0	0
E9PDE8	0	0	0	0	0	1	0	0	1	0	0
E9PDN4	0	0	0	0	0	0	0	0	0	0	0
E9PEF1;O00408;O00408-3;O00408-4	0	0	0	0	0	0	1	0	0	0	0
E9PEJ6;H0Y547;P98196	0	0	0	0	1	0	0	0	0	1	1
E9PEP6;O14786	0	0	0	0	1	0	0	0	0	0	1
E9PEQ6	0	1	0	0	0	1	0	0	1	0	0
E9PER6;O15530;O15530-2;O15530-3	0	0	0	0	0	0	1	0	0	0	0
E9PEW8	0	1	1	0	0	0	0	0	0	0	0
E9PEX6;P09622	0	0	0	1	0	0	0	1	0	0	0
E9PF10;O75694	0	1	0	0	0	0	0	0	0	0	0
E9PF16;Q96CM8;Q96CM8-2;Q96CM8-3	0	0	0	0	0	0	0	1	0	0	0
E9PF19;Q96E41;Q9Y4P3	0	0	0	0	0	0	0	1	0	0	0
E9PFF8	0	0	1	0	1	0	0	0	0	0	1
E9PFK5;P78316;P78316-2	0	1	0	0	0	0	0	0	0	0	0
E9PFK9;Q9UJ41;Q9UJ41-3;Q9UJ41-4	0	1	0	0	0	0	1	0	0	0	0
E9PFR3;Q14738;Q14738-2;Q14738-3	0	0	0	0	0	0	1	0	0	0	0
E9PFR9;J3KQJ8;Q96N96;Q96N96-2;Q96N96-3;Q96N96-5;Q96N96-6	0	0	0	0	0	0	0	1	0	0	0
E9PG19;O94868;O94868-2	1	0	0	0	0	0	0	0	0	0	0
E9PG32;Q6ZR08	0	0	1	0	0	0	0	0	0	0	0
E9PG40;P05067;P05067-11;P05067-7;P05067-8;P05067-9	0	0	1	0	1	0	0	0	0	0	0
E9PG71;P54764;P54764-2	0	0	0	1	0	0	0	0	0	1	1
E9PG73;Q13427	0	1	0	0	0	0	0	0	0	0	0
E9PGC0;P20936;P20936-2;P20936-4	0	0	0	0	0	0	1	0	0	0	0
E9PGM7;O94988;O94988-1;O94988-3;O94988-5;O94988-6	0	0	0	0	0	1	0	0	0	0	0
E9PGQ0;Q96H78	0	0	0	0	0	0	0	1	0	0	0
E9PGT3;Q15418;Q15418-2;Q15418-4	0	0	0	0	0	0	1	0	0	0	0
E9PGT6;Q99627	1	0	0	0	0	0	1	0	0	0	0
E9PHI4;O94901-9	0	1	0	0	0	0	0	1	0	0	1
E9PHR9;Q9NRQ2;Q9NRQ2-2	0	1	0	0	0	0	0	0	0	0	1
E9PHT3;Q8IYS0;Q8IYS0-2	0	0	0	0	0	0	0	0	0	0	0
E9PHV5;P28290	0	1	0	1	0	0	0	0	0	0	1
E9PHX8;H7C3L9;Q12866	0	0	0	0	0	0	0	0	0	1	1
E9PHY5;O43491-4	0	0	0	1	0	0	0	0	0	0	0
E9PHY8;Q8NDA8	0	0	0	0	0	1	0	0	1	0	0
E9PI41	0	1	0	0	0	0	0	0	0	0	0
E9PI92	0	0	0	0	0	0	0	0	1	0	0
E9PIC5;Q8N4M1-4;Q8N4M1-5;Q8N4M1-6	0	0	0	1	0	0	0	0	0	0	0
E9PIE3;Q969G5	0	0	1	0	0	0	0	0	0	1	1
E9PIF4;Q99519	0	0	0	1	0	0	0	0	0	0	0
E9PIG5;O00212	0	0	0	0	0	0	0	0	0	0	0
E9PIH9;F8WA39;H0YDX3;Q13613;Q13613-2;Q8NEC6	0	0	1	0	0	0	0	0	0	0	0
E9PIZ1	0	0	0	0	0	1	0	0	0	0	0
E9PIZ2;H0YDB8;Q8N3Y3	0	0	1	0	0	0	0	0	0	0	0
E9PJ55;Q9NUJ3	0	0	0	0	0	0	1	0	0	0	0
E9PJE4;Q9GZQ3	0	0	0	0	0	1	0	0	1	0	0
E9PJI1;Q92993;Q92993-2;Q92993-3;Q92993-4	0	1	0	0	0	0	0	0	0	0	0
E9PJJ5;E9PK99;E9PMS5;E9PRT1;Q4G0X4	1	0	0	0	0	0	1	0	0	0	0
E9PJN9	0	0	0	0	1	0	0	1	0	0	0
E9PJQ3;Q8N413;Q8N413-4	0	0	0	0	0	0	0	1	0	0	0
E9PJW8;E9PQA6;Q96EY5;Q96EY5-2;Q96EY5-3	0	0	0	0	0	1	0	0	1	0	0
E9PK25;G3V1A4;P23528	0	0	0	0	0	0	1	0	0	0	0
E9PK67;E9PNI7;Q53GL7	0	0	0	0	0	0	1	0	0	0	0
E9PK91;Q9NYF8;Q9NYF8-2;Q9NYF8-3	0	1	0	0	0	0	0	0	0	0	0
E9PKA8;E9PQL5;E9PSC8;Q6ZUT1;Q6ZUT1-2;Q6ZUT1-3	0	0	0	0	0	0	0	0	1	1	0
E9PKC0;Q6IQ23;Q6IQ23-2	0	0	0	0	0	0	0	1	0	1	1
E9PKE9;G3V148;Q9H920;Q9H920-2	0	0	0	0	0	0	0	0	0	0	0
E9PKF6;H7BXH2;Q5H9R7;Q5H9R7-2;Q5H9R7-5;Q5H9R7-6	0	0	0	0	0	0	1	0	0	0	0
E9PKG1;Q99873;Q99873-2;Q99873-3	1	0	0	0	0	0	1	0	0	0	0
E9PKN0;E9PQ01;O94913	0	0	0	0	0	1	0	0	1	0	0
E9PKP7;P17480-2	0	1	0	0	0	0	0	0	0	0	0
E9PKP8;E9PS00;H0YCN1;H0YED5;Q9Y5Q0	0	0	0	0	0	0	0	0	1	0	0
E9PKS9;E9PQE8;Q9Y296;Q9Y296-2	0	0	0	0	0	0	0	0	0	0	0
E9PKT4;Q8N131;Q8N131-2	0	0	0	0	0	1	0	0	1	0	0
E9PKT9;O96033	0	0	0	0	0	0	1	0	0	0	0
E9PL17;Q92989;Q92989-2	1	0	0	0	0	0	0	0	0	0	0
E9PL57	0	0	0	0	0	0	1	0	0	0	0
E9PLD0;Q9H0U4	0	0	0	0	0	0	0	0	0	0	0
E9PLI6;E9PNH5;E9PS76;Q8N9N8	0	0	0	0	0	0	0	0	0	0	0
E9PLK3;P55786	0	0	0	0	0	0	1	0	0	0	0
E9PLN8;F8W9H0;I3L3B4;Q9BQB6;Q9BQB6-2;Q9BQB6-3	0	0	0	0	0	0	0	0	1	1	0
E9PLP8;Q12996	0	1	0	0	0	0	0	0	0	0	0
E9PLY5	1	0	0	0	0	0	1	0	0	0	0
E9PM19;P29597	0	0	0	0	0	0	0	0	0	1	1
E9PM62;Q5T9L3;Q5T9L3-2	0	0	0	0	1	0	0	0	0	0	1
E9PM75;Q9NTG7	0	0	0	0	0	0	0	1	0	0	0
E9PM90;Q9UK41;Q9UK41-2	0	0	0	0	0	0	1	0	0	0	0
E9PMB9;Q16798	0	1	0	0	0	0	0	0	1	0	1
E9PMG5	0	0	0	0	0	0	0	1	0	0	1
E9PMI6;J3KN38;P54105	1	0	0	0	0	0	1	0	0	0	0
E9PMJ1;E9PS06;Q15771	0	0	1	0	0	0	0	0	1	0	0
E9PMJ5	0	0	0	0	0	0	0	1	0	0	0
E9PMQ6;Q00613;Q00613-2	1	0	0	0	0	0	0	0	0	0	0
E9PMR4;K4DIA7;P48509	0	0	0	0	0	0	0	0	0	1	1
E9PMS6	0	1	0	0	0	0	0	1	0	0	0
E9PN76;Q8ND24;Q8ND24-2	0	0	1	0	0	0	0	0	0	0	0
E9PN78;Q4KMG0;Q4KMG0-2	0	0	0	0	0	0	0	0	0	0	0
E9PN89	0	0	0	0	0	0	0	0	0	0	0
E9PNE5;Q9H1C4	0	0	1	0	0	0	0	0	0	0	0
E9PNL8;Q13574;Q13574-1;Q13574-3;Q13574-4;Q13574-5;Q13574-6;Q13574-7	0	0	0	0	0	0	0	0	0	0	0
E9PNP3;E9PR47;Q9H7C9	0	0	0	0	0	0	1	0	0	0	0
E9PPF6	0	0	1	0	0	0	0	0	0	1	1
E9PPQ1;J3KNE7;Q16890;Q16890-5	0	0	1	0	0	0	1	0	0	0	0
E9PPZ9;O43292;O43292-2	0	0	0	0	1	0	0	0	0	0	0
E9PQ59;Q6P4R8;Q6P4R8-2;Q6P4R8-3	0	1	0	0	0	0	0	0	0	0	0
E9PQ73;Q8TDW7;Q8TDW7-1	1	0	0	0	0	0	1	0	0	0	0
E9PQC9	0	0	0	0	0	0	0	0	1	0	0
E9PQD7;P15880	0	0	0	0	0	0	0	1	0	0	0
E9PQM8;E9PRF4;Q15047;Q15047-3	0	0	0	0	0	0	1	0	0	0	0
E9PQY2;Q9NQP4	0	0	0	0	0	0	1	0	0	0	0
E9PQZ2;Q11206;Q11206-2;Q11206-3;Q11206-4;Q11206-5;Q11206-6;Q11206-7	0	0	0	0	0	0	0	0	1	0	0
E9PR30;P62861	0	0	0	0	1	0	0	1	0	0	0
E9PR76;E9PSH4;Q9H063	1	0	0	0	0	0	0	0	0	0	0
E9PR92	0	0	0	0	0	0	0	0	1	0	1
E9PRP3	0	0	0	0	0	0	0	1	0	0	0
E9PRQ7;Q04323	1	0	0	0	0	0	1	0	0	0	0
E9PRU1;O95967	0	0	0	0	0	0	1	0	0	0	0
E9PS41;Q6RFH5;Q6RFH5-2	0	1	0	0	0	0	0	0	0	0	0
E9PS44;Q01628	0	0	0	0	0	1	0	0	0	0	0
E9PSA5;Q96Q83	0	0	0	0	0	0	0	0	0	0	0
E9PSI1	0	0	0	0	0	0	1	0	0	0	0
ENSEMBL:ENSBTAP00000001528	0	0	0	0	0	0	0	0	0	1	0
ENSEMBL:ENSBTAP00000007350	0	0	1	0	1	0	0	0	0	0	0
ENSEMBL:ENSBTAP00000024146	0	0	0	0	1	0	0	0	0	0	0
ENSEMBL:ENSBTAP00000024462;ENSEMBL:ENSBTAP00000024466	0	0	0	1	0	0	0	1	0	1	1
ENSEMBL:ENSBTAP00000038329;REFSEQ:XP_001252647	0	0	0	0	0	0	0	0	1	1	0
F2Z2H4;J3KPC0;Q5VVY4;Q86XD8	0	0	0	0	0	0	0	0	1	0	0
F2Z2J1;Q15349;Q15349-2;Q15349-3	1	0	0	0	0	0	1	0	0	0	0
F2Z2U4;H0Y4W2;Q9Y4A5;Q9Y4A5-2	0	1	1	0	0	0	0	0	0	0	0
F2Z2W7;Q8IZ69;Q8IZ69-2	1	0	0	0	0	0	0	0	0	0	0
F2Z2X4;Q9C0E2	1	0	0	0	0	0	1	0	0	0	0
F2Z2X9	0	0	0	0	1	0	0	0	1	0	0
F2Z357;J3KPC5;P47736;P47736-4	0	0	0	0	0	0	1	0	0	0	0
F2Z3K0	1	0	0	0	0	0	0	0	0	0	0
F5GWB9;I3L1L5;I3L2B9;I3L4D7;I3L4R7;I3L517;Q8NHS9;Q8NHS9-2;Q8NHS9-3	0	1	0	0	0	0	0	1	0	0	0
F5GWI0;F5H2L3	1	0	0	0	0	0	1	0	0	0	0
F5GWI4;P00813	0	0	0	0	0	0	1	0	0	0	0
F5GWR7;P23468;P23468-2;P23468-3;P23468-4;P23468-5;P23468-6;P23468-7;Q3KPI9	0	0	0	0	0	0	0	0	0	1	1
F5GX19;F5H3Y3;Q6IAA8	0	0	0	0	1	0	0	0	0	0	0
F5GX23;F5H5V4;J3KN29;O00233;O00233-2	1	0	0	0	0	0	1	0	0	0	0
F5GX26;Q7Z3Z4;Q7Z3Z4-2;Q7Z3Z4-3	0	0	0	0	0	1	0	0	0	0	0
F5GXC5;H3BUJ1;Q8TB96	0	0	0	0	0	1	0	0	1	0	0
F5GXJ1;F5H5N1;O75251;O75251-2	0	0	0	0	0	0	0	1	0	0	0
F5GXW5;Q99622	0	1	0	0	0	0	1	0	0	0	0
F5GXX5;P61803	0	0	0	0	0	0	0	1	0	0	0
F5GXX6;F5H271;Q9NQ89	0	0	0	0	0	0	0	0	1	0	0
F5GY03;P09486	0	0	0	0	1	0	0	0	0	0	1
F5GY80;F5H7G1;P07358	0	0	0	0	1	0	0	0	0	0	0
F5GYJ5;Q9NX18	0	0	0	0	0	0	0	1	0	1	0
F5GYK2;Q9NRL3;Q9NRL3-3	0	0	0	0	0	0	0	0	0	0	0
F5GYQ1;P61421	0	0	0	0	1	0	0	0	0	0	0
F5GYQ6;H7C1B8;H7C499;Q96HL8;Q96HL8-2;Q96HL8-3;Q96HL8-4;S4R3I7	0	1	0	0	0	0	0	0	0	1	0
F5GYQ7	0	0	0	0	0	0	1	0	0	0	0
F5GZ54	0	0	0	0	0	0	0	1	0	0	0
F5GZ97;Q9Y3C0	0	0	0	0	0	0	0	0	1	0	0
F5GZG1	0	0	1	0	0	0	0	0	0	1	1
F5GZQ1	0	0	0	0	0	0	0	0	1	0	0
F5GZY7;Q9H0R8;Q9H0R8-2	0	0	0	0	0	0	0	0	0	0	0
F5H001;F5H7N8	0	0	1	0	0	1	0	0	1	0	0
F5H039;Q9NQX3;Q9NQX3-2	1	0	0	0	0	0	1	0	0	0	0
F5H0C4;Q9BRP4;Q9BRP4-2	1	0	0	0	0	0	0	0	0	0	0
F5H0F9;Q9UJX4;Q9UJX4-3	1	1	0	0	0	0	0	0	0	0	0
F5H0R1;H3BRB1;Q9H6E5	0	0	0	0	0	0	1	0	0	0	0
F5H0U5;Q9NZD2	0	0	0	0	0	0	1	0	0	0	0
F5H101;F8WE42;Q76FK4;Q76FK4-4	0	1	0	0	0	0	0	0	0	0	0
F5H116	0	1	0	1	0	0	0	1	0	0	0
F5H157;Q15286	0	0	1	0	0	0	0	0	0	0	0
F5H199;F5H7C4;Q8IXL7-2	0	0	0	0	0	0	1	0	0	0	0
F5H1R2;Q8IY45;Q8IY45-2	0	0	0	0	0	0	0	0	0	0	0
F5H1R4;K7EM85;K7ES92;K7ES98;Q92619;Q92619-2	0	0	0	0	0	0	0	0	0	1	0
F5H1S1;Q92521	0	1	0	0	0	0	0	0	1	0	0
F5H1U9;O75970;O75970-3	0	0	0	0	0	0	1	0	0	0	0
F5H1Z6;Q9Y365	0	0	0	0	0	0	1	0	0	0	0
F5H265	0	0	0	0	0	0	0	0	0	1	1
F5H269;Q9Y485	0	0	0	0	0	0	0	0	0	0	0
F5H2B9;H0YNH8;Q9BZF9;Q9BZF9-2	0	0	0	0	0	0	0	0	0	0	0
F5H365;Q15436	0	0	0	0	0	1	0	0	1	0	0
F5H369;O75747	0	1	0	0	0	0	0	0	0	0	0
F5H3G9;F5H4N6;Q9Y3R0;Q9Y3R0-2;Q9Y3R0-3	1	0	0	0	0	0	0	0	0	0	0
F5H3Y4;Q8IY37	0	1	0	0	0	0	0	0	0	0	0
F5H442;Q99816	0	0	0	0	0	0	1	0	0	0	0
F5H459;Q92572	0	0	0	0	0	0	0	0	0	0	0
F5H4F1;Q99638	1	0	0	0	0	0	0	0	0	0	0
F5H4R1;F5H538;J3KNB8;Q9Y6R4;Q9Y6R4-2	0	0	0	0	0	0	1	0	0	0	0
F5H4X9	0	0	1	0	0	0	0	0	0	0	0
F5H523;Q9P2K6	1	0	0	0	0	0	0	0	0	0	0
F5H5A3;Q8IVH8;Q8IVH8-2;Q8IVH8-3	0	1	0	0	0	0	0	0	0	0	0
F5H5I6;H0Y8R1;H0YAK1;Q12849	0	0	0	0	0	0	0	1	0	0	0
F5H5P2;P12694	0	0	0	0	0	0	0	1	0	0	0
F5H5R8;P18440	0	0	0	0	0	0	1	0	0	0	0
F5H5T5;Q7Z3V4	0	0	0	0	0	0	0	0	0	0	0
F5H619;Q86XA9;Q86XA9-2	1	0	0	0	0	0	0	0	0	0	0
F5H658;Q14562	0	1	0	0	0	0	0	0	1	1	1
F5H6Q1;J3KR44;Q96FW1	0	0	0	0	0	0	1	0	0	0	0
F5H6U7;G3V1U5;Q9Y3E0	0	0	0	0	1	0	0	0	1	0	0
F5H6Z0;Q00537;Q00537-2	0	0	0	0	0	0	1	0	0	0	0
F5H702;Q96GC5;Q96GC5-3	0	0	0	0	0	0	0	1	0	0	0
F5H760	0	1	0	0	0	1	0	0	0	1	0
F5H785;P0DI81;P0DI81-3;P0DI82	0	0	0	0	0	0	0	0	0	0	0
F5H7I0;Q8NC69	1	0	0	0	0	0	0	0	0	0	0
F5H7I4;H9ZYI9;Q06547;Q06547-2;Q06547-3;Q06547-4	0	1	0	0	0	0	0	0	0	0	0
F5H7J9;H0YGW5;O75581	0	0	1	0	0	0	0	0	0	1	1
F5H7P7;Q96BP3	0	1	0	0	0	0	0	0	0	0	0
F5H7S3	0	1	0	1	0	0	0	0	0	0	0
F5H7V9;J3QSU6;P24821;P24821-2;P24821-3;P24821-4	0	1	0	0	0	0	0	0	0	0	0
F5H8F7;Q9UBL3;Q9UBL3-3	0	1	0	0	0	0	0	0	0	0	0
F5H8H2;Q03426	0	0	0	0	0	0	1	0	0	0	0
F6M2K2;F6M2K4;Q14686	0	1	0	0	0	0	0	0	0	0	0
F6QDS0;I3L0H8;Q9NUU7	0	0	0	0	0	0	1	0	0	0	0
F6QTA4;Q5JQZ9;Q9BWU1;Q9BWU1-2	0	1	0	0	0	0	0	0	0	0	0
F6RY50;Q96FS4	0	0	0	1	0	0	0	1	0	0	0
F6SDV2;Q9GZM7;Q9GZM7-3	0	0	1	0	0	0	0	0	0	0	1
F6SFZ6;Q99571;Q99571-2;Q99571-3	0	0	0	0	0	0	0	0	0	0	1
F6TB26;Q5SZR4;Q9Y2W6	0	0	0	0	0	0	0	1	0	0	0
F6UJY1;J9JIE9;Q5T013	0	0	0	0	0	0	1	0	0	0	0
F6VRR5;Q9BY77	0	1	0	0	0	0	0	0	0	0	0
F6VZ39;H0YA61;Q9BX46;Q9H0Z9;Q9H0Z9-2	0	1	0	0	0	0	0	0	1	0	0
F6XA08;Q5VYX0;Q5VYX0-2	0	0	0	0	0	0	0	0	0	1	1
F6XHT0;Q9Y6D0	0	0	0	0	1	0	0	0	0	0	0
F6XZD3;Q8N283	0	0	0	1	0	0	0	0	0	0	0
F8VP71;Q6P1Q0;Q6P1Q0-2;Q6P1Q0-4;Q6P1Q0-7	0	0	0	0	0	0	0	1	0	0	0
F8VPD4	1	0	0	0	0	0	0	0	0	0	0
F8VPN1;F8VQE3;F8VRQ9;F8VUB3;F8VWP8;F8VXS2;F8VZI3;F8W0X2;Q9P1Z2;Q9P1Z2-2;Q9P1Z2-3	1	0	0	0	0	0	0	0	0	0	0
F8VQD9;F8VVA0;Q9BSB4	0	0	0	0	0	0	1	0	0	0	0
F8VQR7;F8VW96;Q16527	0	0	1	0	0	0	0	0	0	0	0
F8VRE8;Q96HH6;Q96HH6-2	0	0	0	0	1	0	0	0	0	0	0
F8VRX1;O95398;O95398-2;O95398-3	0	0	0	0	0	1	0	0	0	0	0
F8VS61	0	1	0	0	0	0	0	1	0	0	0
F8VTY2;Q8NFH4	0	1	0	0	0	0	0	0	0	0	0
F8VU90;Q9NYL4;Q9NYL4-2	0	0	0	0	1	0	0	1	0	0	0
F8VUB4;F8VV52;Q9NZN8	0	0	0	0	0	0	0	0	0	0	0
F8VUC5;F8VVA7;F8VXB1;F8VXR1;F8VYZ4;F8W156;P61923;P61923-4;P61923-5	0	0	0	0	0	1	0	0	0	0	0
F8VUF6;F8VWU0;F8VX58;F8VXZ8;P07585;P07585-4	0	0	0	0	0	0	0	0	0	0	0
F8VUJ3;Q8N4A0	0	0	0	0	0	0	0	0	1	0	0
F8VUY8;Q96QD8	0	0	1	0	0	0	0	0	1	0	0
F8VV56;F8VWK8;F8W022;P08962;P08962-2;P08962-3	0	0	1	0	1	0	0	0	0	0	0
F8VVL1;O43583	0	0	0	0	0	0	0	0	0	0	0
F8VW50;Q2TAC6;Q2TAC6-2;Q2TAC6-3	0	0	1	0	0	0	0	0	1	0	0
F8VWS0;P05388;P05388-2	0	0	0	0	1	0	0	1	0	0	0
F8VWT9;J3KPF0;Q9Y4D8;Q9Y4D8-4	0	0	0	0	0	0	0	0	0	0	0
F8VWW7;Q8NCJ5	0	0	0	0	0	0	0	0	0	0	1
F8VWY2;Q9UBM8;Q9UBM8-2	0	0	1	0	0	0	0	0	0	0	0
F8VWZ8;Q52LW3	1	0	0	0	0	0	0	0	0	1	0
F8VX10;F8VXI8;H0YIQ8;Q9H9L4	0	1	0	0	0	0	0	0	0	0	0
F8VXC8;Q8TAQ2;Q8TAQ2-2;Q8TAQ2-3	0	1	0	0	0	0	0	0	0	0	0
F8VXD5;Q53FV1	0	0	0	0	1	0	0	0	0	0	1
F8VXH0;J3KQA0	0	0	0	0	0	0	0	0	0	0	0
F8VXY6;G3V1V1;Q8TBF4	0	0	0	0	0	0	0	0	0	1	0
F8VYE8;P36873;P36873-2	0	1	0	0	0	0	0	0	0	0	0
F8VZA0;Q9H0K6	0	0	0	0	0	0	0	1	1	0	0
F8W038;Q8IXM2;Q8IXM2-3	0	0	0	0	0	1	0	0	0	0	0
F8W0A2	0	0	1	0	0	0	0	0	0	1	0
F8W0A3	0	1	0	0	0	0	0	0	0	0	0
F8W0Q9;Q8NEY8-2;Q8NEY8-8;Q8NEY8-9	0	1	0	0	0	0	0	0	0	0	0
F8W0U9;Q149M9;Q149M9-3	0	0	1	0	0	0	0	0	0	0	1
F8W111;P14384	0	0	0	0	0	0	0	0	0	1	1
F8W1A4;P54819;P54819-2	0	0	0	1	0	0	0	1	0	0	0
F8W1B3	0	0	0	0	1	0	0	0	0	0	0
F8W1C3;Q99542	0	0	1	0	0	0	0	0	0	1	1
F8W1R9;P36897;P36897-2;P36897-3	0	0	0	0	1	0	0	0	0	0	0
F8W6G1;Q9UHY1	0	0	0	0	0	0	1	0	0	0	0
F8W6M3;H0Y6A5;Q9NYG2;Q9NYG2-2	0	0	0	0	0	0	0	0	1	0	0
F8W6W2	0	0	1	0	0	0	0	0	0	0	0
F8W703;Q9HCK4;Q9HCK4-2;Q9HCK4-3;R4GMM8	0	1	0	0	0	0	0	0	0	1	1
F8W726	0	0	0	0	0	0	0	0	0	0	0
F8W727;P62910	0	0	0	0	1	0	0	1	0	0	0
F8W775	0	0	1	0	0	0	1	0	0	0	0
F8W776;Q8TC24;Q9H9S3;Q9H9S3-2;Q9H9S3-3	0	0	0	0	0	0	0	1	0	0	0
F8W7A7;J3KSU3;Q5BJE1;Q5BJE1-2;Q5BJE1-3;Q5BJE1-4	0	0	0	0	0	0	0	1	0	0	0
F8W7C6	0	0	0	0	0	0	0	1	0	0	0
F8W7L6;P42262;P42262-2;P42262-3;P42262-4	0	0	0	0	0	0	0	0	0	0	0
F8W7Q2	0	0	0	0	0	0	0	0	1	0	0
F8W7Q4;Q96A26	0	0	0	0	0	0	0	1	0	0	0
F8W7S5	0	1	0	0	0	0	0	0	0	0	0
F8W7T1;Q92784-3	1	0	0	0	0	0	1	0	0	0	0
F8W876;P48740;P48740-2;P48740-3;P48740-4	0	0	0	0	0	0	0	0	0	1	1
F8W8H5;Q969Q5	0	0	0	1	1	0	0	0	0	0	0
F8W930;Q9Y6M1;Q9Y6M1-1;Q9Y6M1-3;Q9Y6M1-4;Q9Y6M1-5;Q9Y6M1-6	0	0	0	0	0	0	0	0	0	0	0
F8W9E7;Q96BJ8;Q96BJ8-2;Q96BJ8-3	1	0	0	0	0	0	0	0	0	0	0
F8W9J4;Q03001	0	1	0	1	0	0	0	0	0	0	0
F8W9Q8;G3V426;Q86TW2;Q86TW2-2	0	0	0	0	0	0	0	1	0	0	0
F8W9U4	0	0	1	0	0	0	0	0	1	0	0
F8W9X7;Q567U6	0	0	0	0	0	1	0	0	1	0	0
F8WA11;Q7Z460;Q7Z460-2;Q7Z460-3;Q7Z460-4;Q7Z460-5	0	0	0	0	0	0	1	0	0	0	0
F8WAJ0;Q9H8H2;Q9H8H2-2;Q9H8H2-4	0	1	0	0	0	0	0	0	0	0	0
F8WAS2	0	0	1	0	0	0	0	0	1	1	0
F8WB95;G3V0G5;Q8IV38	0	0	1	0	0	0	1	0	0	0	0
F8WBF9;Q5TH30;Q9UGV2;Q9UGV2-2;Q9UGV2-3	0	0	1	0	0	0	0	0	0	0	0
F8WBJ6;Q9NRX1	0	1	0	0	0	0	0	0	0	0	0
F8WBQ5;F8WDJ7;Q03938	0	0	0	1	0	0	0	1	0	0	1
F8WBW1;F8WC41;Q86X83;Q86X83-2	0	0	0	0	0	0	0	0	0	0	0
F8WC62;Q96KD3;Q96KD3-2	0	0	0	0	0	0	0	0	0	0	0
F8WCX2;H0Y5I5;Q8N1G0;Q8N1G0-2	0	0	1	0	0	0	0	0	0	1	0
F8WDE4;Q9NP87;Q9NP87-2	0	0	1	0	0	0	0	0	0	0	0
F8WDT6;H7C2C9	0	0	1	0	0	1	0	0	1	0	0
F8WDV0;Q9UI26;Q9UI26-2	0	0	0	0	0	0	1	0	0	0	0
F8WDW2	0	1	0	0	0	0	0	0	0	0	0
F8WEA2	0	0	1	0	1	0	0	0	0	1	1
[truncated: 5,989 more rows]

## Sheet: E05_B_middle
localization combinations in HFHF fed
Protein	fCC_protein-complex	fCC_Nucleus	fCC_LD	fCC_Peroxisome	fCC_ER	fCC_endosome-vesicle	fCC_Cytoplasm	fCC_Mitochondria	fCC_Golgi apparatus	fCC_Lysosome	fCC_PM
A0A024QZ33;K7EK40;K7EMD8;K7ERM9;Q9H0G5	1	0	0	0	0	0	0	0	0	0	0
A0A024QZW4;Q9H1N7	0	0	0	0	0	0	0	0	1	0	0
A0A024QZX5;A0A087X1N8;A0A2R8YD12;P35237	0	0	0	0	0	0	1	0	0	0	0
A0A024R3B9;E9PJL7;E9PNH7;E9PRA8;P02511	0	0	0	0	0	1	1	0	0	0	0
A0A024R3M2;A0A1B0GUD6;A0A1B0GWG7;A0A2R8Y5X2;J3KNL5;Q3KR37;Q3KR37-2;Q3KR37-3;Q3KR37-4	0	0	0	0	0	0	0	0	1	0	0
A0A024R4E5;Q00341	0	0	0	0	0	0	0	1	0	0	0
A0A024R571;Q9H4M9	0	0	0	0	0	0	0	0	0	0	0
A0A024R5I4;O94956	0	0	0	0	1	0	0	0	0	0	1
A0A024R6I7;P01009	0	0	0	0	0	0	0	0	0	0	0
A0A024R7E8;K7EMV4;K7EN05;K7EPC8;K7EQ44;P60002	0	0	0	0	1	0	0	0	1	0	0
A0A024R7W5;A0A087WY31;A0A087X0Q1;Q7Z739	0	0	0	0	1	0	0	0	0	0	0
A0A024RA52;P25787	1	0	0	0	0	0	0	0	0	0	0
A0A024RAC6;Q14241	0	0	0	0	0	0	0	0	1	0	0
A0A024RBG1;Q9NZJ9-2	0	0	0	0	0	0	1	0	0	0	0
A0A024RCG2;Q96BI1	0	0	0	0	1	0	0	0	0	0	0
A0A024RCN4;A0A087X2F1;B4DMT1;Q16670;Q16670-2	0	1	0	0	0	0	0	0	0	1	1
A0A024RCQ8;A0A0G2JH76;A0A0G2JHB6;A0A0G2JIU6;A0A0G2JK02;A0A0G2JKR3;A0A0G2JLA3;A0A0G2JLL3;A0A140T8X7;A0A140T9Y1;G8JLL2;Q9UMR5;Q9UMR5-2;Q9UMR5-3	0	0	0	0	1	0	0	0	0	0	0
A0A024RCR6;A0A0G2JK23;P46379;P46379-2;P46379-3	0	0	0	0	0	0	1	0	0	0	0
A0A044PY82	0	1	0	0	0	0	0	0	0	0	1
A0A067XG54;Q8NB49;Q8NB49-2;Q8NB49-3;Q8NB49-4	0	0	0	0	0	0	0	0	0	0	0
A0A075B6F0;H7BXG6;M0R167;Q9H0D2;Q9H0D2-2	0	0	0	0	0	1	0	0	1	1	0
A0A075B6F9;Q9Y314	0	0	0	0	0	0	1	0	0	0	0
A0A075B6G3;A0A087WTU7;A0A087WV90;A0A5H1ZRP8;P11532;P11532-11;P11532-4	0	0	0	1	0	0	0	0	0	0	0
A0A075B6U9	0	0	0	0	0	0	0	0	0	0	0
A0A075B6W5	0	0	1	0	0	0	0	0	1	0	0
A0A075B727;A0A075B728;P16284;P16284-2;P16284-3;P16284-4;P16284-5;P16284-6	1	0	0	0	0	0	0	0	1	0	0
A0A075B730;P58107	0	1	0	0	0	0	0	1	0	0	1
A0A075B749;A0A087WX83;Q5VU43;Q5VU43-3;Q5VU43-4	0	1	0	0	0	0	0	0	0	0	0
A0A075B754;Q96QE3;Q96QE3-2	0	1	0	0	0	0	0	0	0	0	0
A0A075B773;K7ELY8;O00623	0	0	1	0	0	0	0	0	0	0	1
A0A075B784;E9PEW0;K7ELR5;Q8IXW9;Q9P275	0	1	0	0	0	0	0	0	0	0	0
A0A075B7B1;C9JIE4;O15061;O15061-2;O15061-3	0	0	1	0	0	0	0	0	0	0	0
A0A075B7B5;B7ZM87;O75044	0	0	0	0	0	0	0	0	0	0	0
A0A075B7F1;S4R3C0	0	0	1	1	0	0	0	1	0	0	0
A0A087WSV6;A0A087WSX8;A0A0B4J1W1;A0A0G2JLS4;A0A0G2JM99;A0A0G2JMY9;A0A0G2JNK9;A0A0G2JNM2;A0A0G2JNQ6;A0A0G2JNR3;A0A0G2JP64;A0A0G2JP80;A0A0G2JP96;A0A0G2JQ15;A0A0G2JQ44;A0A0G2JQ46;A8MVE2;D9IDM5;D9IDM6;F6RVM3;F6TER3;O75019;O75019-2;Q8N6C8;Q8N6C8-3;Q8NHL6;Q8NHL6-2;Q8NHL6-3;Q8NHL6-4;Q8NHL6-5	0	0	0	0	0	0	0	0	1	0	0
A0A087WSW7;A0A0B4J1V9;F6XU50;Q9NRZ9;Q9NRZ9-2;Q9NRZ9-3;Q9NRZ9-4;Q9NRZ9-5;Q9NRZ9-6	1	0	0	0	0	0	0	0	0	0	0
A0A087WSW9;A0A087WSY9;Q16881;Q16881-3;Q16881-4	0	0	0	0	0	0	1	0	0	0	0
A0A087WSY5;Q96IY4	0	0	0	0	0	0	0	0	0	1	0
A0A087WSZ7;A0A1B0GW84;D6RHE0;Q08493;Q08493-2;Q08493-3;Q08499;Q08499-10;Q08499-11;Q08499-2;Q08499-3;Q08499-4;Q08499-5;Q08499-6;Q08499-8;Q08499-9;Q32MM7	0	0	1	0	0	1	0	0	1	0	0
A0A087WT18;Q96A73;Q96A73-2	0	0	1	1	0	0	0	1	0	0	0
A0A087WT20;Q9NV06	0	1	0	0	0	0	0	0	0	0	0
A0A087WT23;A0A087WV67;O00124;O00124-3	0	0	0	0	1	0	0	0	1	0	1
A0A087WT30;J3KN91;Q8N5I9	0	0	0	0	0	0	1	0	0	0	0
A0A087WT34	0	0	1	0	0	1	0	0	1	0	0
A0A087WT44	0	0	0	0	1	0	0	0	0	0	0
A0A087WT58;A6NES4	1	0	0	0	0	0	1	0	0	0	0
A0A087WT59;P02766	0	0	0	0	0	0	0	0	0	0	0
A0A087WT84;Q9H9V9;Q9H9V9-2	0	0	0	0	0	0	0	0	0	0	0
A0A087WT87;P43003;P43003-2	0	0	0	0	0	1	0	0	1	0	1
A0A087WT95;P49753	0	0	0	0	0	0	0	1	0	0	0
A0A087WTA5;E7ERK9;Q9UI10;Q9UI10-2;Q9UI10-3	1	0	0	0	0	0	0	0	0	0	0
A0A087WTA8;P08123	0	1	0	0	0	0	0	1	0	0	0
A0A087WTE4;A0A087WTF6;A0A087WV75;A0A087WVU1;A0A087WWD4;A0A087WWJ5;A0A087WX77;A0A087WZS4;A0A087X1V2;A0A0D9SF98;H7BYX6;P13591;P13591-1;P13591-3;P13591-4	0	0	1	0	0	0	0	1	1	0	1
A0A087WTF0;A2A3K4;A2A3K4-2	0	0	0	0	0	1	0	0	1	0	0
A0A087WTG8	0	0	0	0	0	0	0	1	0	0	0
A0A087WTJ6;O14627;P47902;P47902-2;Q99626	0	0	0	0	0	0	0	0	1	0	0
A0A087WTK0;A0A087WVC6;Q12913	0	0	0	0	1	0	0	0	0	0	1
A0A087WTM1;Q9Y6N7;Q9Y6N7-2;Q9Y6N7-3;Q9Y6N7-4;Q9Y6N7-5;Q9Y6N7-6	0	0	0	0	1	0	0	0	0	0	1
A0A087WTP3;Q92945	0	0	0	0	0	0	0	0	0	0	0
A0A087WTQ2;A0A3B3IT47;C9JGR9;E7EQ49;Q9Y2I8;Q9Y2I8-2;Q9Y2I8-3	1	0	0	0	0	0	0	0	0	0	0
A0A087WTS0;H0YJK8;P18283	0	0	0	0	0	0	1	0	0	0	0
A0A087WTT2;Q5JWB9;Q96A57;Q96A57-2	0	0	0	0	0	0	0	0	1	0	0
A0A087WTU3;Q9Y6I9	0	0	0	0	1	0	0	0	0	0	0
A0A087WTV6;A0A087WZR9;Q96C36	0	0	0	0	0	1	0	0	0	0	1
A0A087WTY4;P49454	0	1	0	0	0	0	0	0	1	0	1
A0A087WTY7;Q9H227	0	0	0	0	0	0	1	0	0	0	0
A0A087WTZ8;E5RFJ1;E5RHW9;E5RIM1;Q96MF7	0	0	0	0	0	0	0	1	0	0	0
A0A087WU02;Q96RQ1	0	0	0	0	0	1	0	0	1	0	0
A0A087WU05;A0A087WY48;Q8IY22;Q8IY22-2;Q8IY22-3	0	0	1	0	0	1	0	0	1	0	0
A0A087WU07;Q5TGZ0;Q5TGZ0-2	0	0	0	0	0	0	0	1	0	0	0
A0A087WU25	0	1	0	0	0	0	0	1	0	0	0
A0A087WU31;A0A0A0MTB7;E9PE15;P51790;P51790-2;P51790-4;P51790-5	0	0	0	0	0	1	0	0	1	0	0
A0A087WU37;A0A087WWG3;A0A087X140;A0A0A0MRU4;A0A0A6YYH9;C9J3G2;H0Y857;Q5JTY5;Q5JTY5-2;Q5RIA9;Q5RIA9-3;Q5RIB0;Q5RIB3;Q8IUF1;Q9BRT8;Q9BRT8-2;Q9BRT8-3	0	0	0	0	0	0	0	0	0	0	0
A0A087WU46;A0A0A0MSL2;A0A0C4DGN9;B4DWF2;Q13422;Q13422-2;Q9UKS7;Q9UKS7-2;Q9UKS7-4;Q9UKS7-6;Q9UKT9;Q9UKT9-10;Q9UKT9-14;Q9UKT9-15;Q9UKT9-2;Q9UKT9-4;Q9UKT9-7;Q9UKT9-9	0	1	0	0	0	0	0	0	0	0	0
A0A087WU51	1	0	0	0	0	1	0	0	0	0	0
A0A087WU53;Q9H0U3	0	0	0	0	1	0	0	0	0	0	0
A0A087WUB9;Q8WYA6;Q8WYA6-4	0	1	0	0	0	0	0	0	0	0	0
A0A087WUC6;E9PI68;Q15005	0	0	0	0	1	0	0	0	0	0	0
A0A087WUD3;Q9NRP0;Q9NRP0-2	0	0	0	1	1	0	0	1	0	0	0
A0A087WUE2	1	0	0	0	0	1	0	0	1	0	0
A0A087WUE4;A0A0G2JNN3;C9JMY0;Q96PV6;Q96PV6-1	0	1	0	0	0	0	0	0	0	0	0
A0A087WUE6;A4PB68;Q3T8J9;Q3T8J9-2;Q3T8J9-3;Q9H869;Q9H869-2;Q9H869-3;Q9H869-4;Q9H869-5;Q9H869-6;Q9H869-7;Q9H869-8;Q9H869-9	0	0	1	1	0	0	0	0	0	0	1
A0A087WUI6;Q8WXW3	0	0	0	0	1	0	0	0	1	0	1
A0A087WUJ1;Q9H400;Q9H400-2	0	0	0	0	0	0	0	0	0	0	1
A0A087WUJ4;Q92618	0	0	0	0	0	1	0	0	1	0	0
A0A087WUK2;O14979;O14979-2;O14979-3	0	1	0	0	0	0	0	0	0	0	0
A0A087WUL2	1	0	0	0	0	0	0	0	0	0	0
A0A087WUL4;A0A087WX23;A0A087WZG9;B4DSP0	0	0	0	0	0	1	0	0	1	0	0
A0A087WUM5;Q5VZR0;Q9H4G4	0	0	0	0	0	0	0	0	0	0	1
A0A087WUQ6;P07203	0	0	0	0	0	0	0	1	0	0	0
A0A087WUT0;A0A0A0MR39	0	1	0	0	0	0	0	0	0	0	0
A0A087WUT6;O60841	0	0	0	0	0	0	0	0	0	0	0
A0A087WUU8;M0R3J2	0	0	0	1	0	0	0	1	0	0	0
A0A087WUV7;A0A3B3IS76;A0A3B3ISL9;A0A3B3ISM6;A0A3B3ISX6;A0A3B3ITJ2;A0A3B3IUC8;P10746;Q5T3L9	1	0	0	0	0	0	0	0	0	0	0
A0A087WUV9	0	0	0	0	0	0	0	0	1	0	0
A0A087WUW6;A0A087X0G7;A0A087X1B1;Q9Y6K9;Q9Y6K9-2;Q9Y6K9-3	0	0	0	0	0	0	1	0	0	1	0
A0A087WUW9;Q9NXU5	0	0	0	0	0	0	1	0	0	0	0
A0A087WUZ7;Q9Y5W8;Q9Y5W8-2	0	0	0	0	1	0	0	0	1	0	0
A0A087WV01	0	0	0	0	0	0	0	1	0	0	0
A0A087WV05;Q99417	0	0	0	0	0	0	1	0	0	0	0
A0A087WV24;P20711;P20711-3	0	0	0	0	0	0	1	0	0	0	0
A0A087WV25;O95684;O95684-2	0	0	0	0	0	0	1	0	0	0	0
A0A087WV39;Q92698;V9GYD3	0	0	0	0	0	0	0	1	0	0	0
A0A087WV96	0	0	0	0	0	0	0	0	1	1	1
A0A087WV97;Q8WU79;Q8WU79-2;Q8WU79-3	0	0	0	0	0	0	1	0	0	0	0
A0A087WVA1;P62341	0	0	0	0	1	0	0	0	0	0	0
A0A087WVA8;Q8IWB9;Q8IWB9-2	0	0	0	0	0	0	0	0	0	0	0
A0A087WVC1;Q9BQ39	0	1	0	0	0	0	0	0	0	0	0
A0A087WVE2;O00602	0	0	0	0	0	0	0	0	1	0	0
A0A087WVF1;K7EQH1;Q96B23;Q96B23-2	0	1	0	0	0	0	0	1	0	0	0
A0A087WVF7;Q9NZM3;Q9NZM3-2	0	0	0	0	0	0	0	0	0	0	0
A0A087WVI0;E9PBL8;Q8WTW3	1	0	0	0	0	1	0	0	0	0	0
A0A087WVM1;P78382;P78382-2;Q5W1L7	0	0	0	0	0	0	0	0	1	0	0
A0A087WVM4;B7ZM99	0	0	1	0	0	0	0	1	0	0	0
A0A087WVP7;P0C024;P0C024-2	0	0	0	1	0	0	0	0	0	0	0
A0A087WVQ6;Q00610;Q00610-2	0	0	0	0	0	1	0	0	0	0	0
A0A087WVS8;Q70IA6;Q70IA6-3	0	0	0	0	0	0	1	0	0	0	0
A0A087WVT6;A0A087X159;D6RAC5;P81877;P81877-2;P81877-3;P81877-4;P81877-5;Q9BWW4;Q9BWW4-2;Q9BWW4-3	0	0	0	0	0	0	0	0	1	0	0
A0A087WVT8;A0A087X1L3;Q6ZWJ8	0	1	1	0	0	0	0	0	0	0	1
A0A087WVX4;P49895;P49895-2;P49895-4	0	0	1	0	1	0	0	0	0	0	0
A0A087WVX5;A0A1B0GTA9;A0A1B0GTF6;A0A1B0GTN8;A0A1B0GTP5;A0A1B0GTS4;A0A1B0GTX2;A0A1B0GU53;A0A1B0GUI8;A0A1B0GUK4;A0A1B0GVB2;A0A1B0GWF9;A0A1C7CYX2;A0A2R8Y555;A0A2U3TZM7;A0A494C0B2;A0A494C0Z9;A0A494C184;E7EN11;F8VNV8;F8VU10;F8VUW8;H0Y476;O00305;O00305-2;O00305-3;O00305-4;P54284;P54284-2;P54284-3;P54284-4;P54284-5;Q02641;Q02641-2;Q02641-3;Q08289;Q08289-10;Q08289-2;Q08289-3;Q08289-4;Q08289-5;Q08289-6;Q0…	0	0	0	0	1	0	0	0	0	0	0
A0A087WVZ7;A0A087X068;Q9UJW7;Q9UJW7-2	0	0	0	0	1	0	0	0	0	0	1
A0A087WVZ9;A0A0A0MQR7;P19388	0	1	0	0	0	0	0	0	0	0	0
A0A087WW00;C9J9H9;P51668;Q9Y2X8	0	0	0	0	0	0	0	0	1	0	0
A0A087WW06;B0QYP5;Q96AY4	0	0	1	0	0	1	0	0	1	0	0
A0A087WW23;P20292	0	1	0	0	0	0	0	0	0	0	1
A0A087WW28	1	0	0	0	0	1	0	0	0	0	0
A0A087WW48;E7ET14;H0Y3N9;H0Y589;O75151;Q9UPP1;Q9UPP1-2;Q9UPP1-3;Q9UPP1-4;Q9UPP1-5	0	0	0	0	0	0	0	0	1	0	0
A0A087WW58;Q9C0D9	0	0	0	0	1	0	0	0	0	0	1
A0A087WW59;Q7Z7L8	0	0	0	0	0	0	1	0	0	0	0
A0A087WW66;Q99460;Q99460-2	1	0	0	0	0	1	0	0	0	0	0
A0A087WW76;A0A1B0GTZ9;A0A1B0GV73;A0A452Q6Z5;H0Y468;Q5T5U3	0	0	0	0	0	0	0	0	0	0	1
A0A087WW77;Q15334	1	0	0	0	0	1	0	0	0	0	0
A0A087WW83;A0A087X0K8;Q6PRD1	0	0	1	0	0	0	0	0	1	0	0
A0A087WWA3;O60333;O60333-2;O60333-4;Q4R9M9	1	0	0	0	0	0	1	0	0	0	0
A0A087WWA7;O14640;O14640-2;P54792;P54792-2	0	0	0	0	0	1	0	0	1	0	0
A0A087WWF6;F8W8R3;P49005	0	1	0	0	0	0	0	0	0	0	0
A0A087WWG5	0	0	0	0	1	0	0	0	0	0	0
A0A087WWH3;Q9NZM4;Q9NZM4-2	0	1	0	0	0	0	0	0	0	0	0
A0A087WWI0	0	0	0	0	0	0	1	0	0	0	0
A0A087WWM0;O43617	0	0	0	0	0	0	1	0	0	0	0
A0A087WWM4;H0YNJ6;Q9P2T1;Q9P2T1-2	1	0	0	0	0	0	1	0	0	0	0
A0A087WWM6;E7EQL6;O43272;O43272-1;O43272-2	0	0	1	0	0	0	0	1	0	0	0
A0A087WWP4;A0A494C001;A0A499FJY3;Q96T37;Q96T37-2;Q96T37-3;Q96T37-4	0	1	0	0	0	0	0	0	0	0	0
A0A087WWP5;Q12962	0	1	0	0	0	0	0	0	0	0	0
A0A087WWP8;A0A0C4DGT8;A0A0C4DH79;Q5VWQ0;Q5VWQ0-4	0	0	0	0	0	0	0	0	1	0	1
A0A087WWQ2;Q92979;V9GYP5	0	1	0	0	0	0	0	0	0	0	0
A0A087WWR2;H3BQI4;H3BQS2;I3L2Z5;P56270;P56270-2;P56270-3;P56270-4	0	1	0	0	0	0	0	0	0	0	0
A0A087WWS1;Q96FV9	0	1	0	0	0	0	0	0	0	0	0
A0A087WWT7;A0A1W2PRP3;Q7Z7M1	0	0	0	1	0	0	0	0	1	0	0
A0A087WWU8	0	1	1	0	0	0	0	0	0	0	0
A0A087WWW9;O95999	0	0	0	0	0	0	1	0	0	0	0
A0A087WWY0;P08519	0	0	0	0	1	0	0	0	0	0	0
A0A087WX02;F8WB74;M0QYX1;P63302	0	0	0	0	0	0	0	0	1	0	0
A0A087WX10;G3V4M2;G3V5E8;P54803	0	1	0	0	0	0	0	0	0	0	0
A0A087WX11;J3KNG8;Q8TF40;Q8TF40-3	0	0	1	0	0	0	0	0	0	0	0
A0A087WX19;A0A087WX45;C9J5R6	0	1	0	0	0	0	0	1	0	0	0
A0A087WX22;H3BVG2;Q2M296-3;Q2M296-4	0	0	0	0	1	0	0	0	0	0	1
A0A087WX80;A0A087WYF1;P24043	0	1	0	0	0	0	0	1	0	0	0
A0A087WX97;Q9BXK5	0	0	0	0	0	0	0	1	0	0	0
A0A087WX99;A0A0G2JRA4;P55283;P55283-2	0	0	0	0	1	0	0	0	0	0	1
A0A087WXB0;O15126	0	0	0	0	0	1	0	0	1	0	0
A0A087WXB8;C9J0E2;C9J480;C9JWJ3;C9JXM2;Q9Y274	0	0	0	0	0	0	0	0	1	0	0
A0A087WXC5;E7ESZ7;O95299	0	0	0	0	0	0	0	1	0	0	0
A0A087WXD1;Q96T83	0	0	0	0	0	0	0	0	1	0	0
A0A087WXF8;A0A087WYV3;A0A0D9SEW3;Q9NP64;Q9NP64-2;Q9NP64-3	0	0	0	1	0	0	0	0	0	0	1
A0A087WXI2;Q9Y6R7	0	1	1	0	0	0	0	0	0	0	0
A0A087WXI5;P12830;P12830-2	0	0	0	0	0	0	0	0	0	0	0
A0A087WXK4;Q7Z3F1	0	0	0	0	0	0	0	0	1	0	0
A0A087WXL0;A0A087X1G7;A0A0J9YX89;A0A3B3IT39;A8MZD0;O60613;O60613-2	0	0	0	0	1	0	0	0	0	0	1
A0A087WXL6;B7Z879;Q9H270	0	0	0	0	0	1	0	0	0	0	0
A0A087WXM6;A0A0A6YYL6;J3KRX5;J3QQT2;P18621;P18621-3	0	0	0	1	1	0	0	1	0	0	0
A0A087WXN9;Q765P7	0	0	0	0	0	0	1	0	0	0	0
A0A087WXP0	0	0	0	0	0	0	0	0	1	0	0
A0A087WXS6;C9JBF1	1	0	1	0	0	0	0	0	0	0	0
A0A087WXU0;A0A2R8Y4J4;Q9NWS8;Q9NWS8-2	0	0	0	0	0	0	0	1	0	0	0
A0A087WXV4;P41235;P41235-2;P41235-4;P41235-5;P41235-6	0	1	0	0	0	0	0	0	1	0	1
A0A087WXW3;Q9Y3P8	0	1	0	0	0	0	0	0	0	0	0
A0A087WXW6;A0A140TA70;A0A140TA74;A9JR48;Q9BXA9;Q9BXA9-2;Q9BXA9-3;Q9BXA9-4	0	1	0	0	0	1	0	0	1	0	0
A0A087WXX8	0	0	1	1	0	0	0	1	0	0	0
A0A087WY00;F8W6H6;F8WE88;G3V394;Q9Y4I1;Q9Y4I1-2;Q9Y4I1-3	0	1	0	0	0	0	0	0	0	0	1
A0A087WY55;Q9NP79	0	0	0	0	0	0	1	0	0	0	0
A0A087WY67;P0CG29;P0CG30;Q6ICJ4	0	0	0	0	0	0	1	0	0	0	0
A0A087WY71;Q96CW1;Q96CW1-2	0	0	0	1	1	0	0	0	0	0	0
A0A087WY85;A0A0A0MQU3;D6RAH7;D6RFM0;H9KV45;P61077;P61077-2;P61077-3;P62837;P62837-2	0	0	0	0	0	0	1	0	0	0	0
A0A087WYA1;Q9UKN7	0	0	1	0	0	0	0	1	0	0	0
A0A087WYD6;A0A0G2JLV0;Q03519;X5CMH5	0	0	0	0	1	0	0	0	0	0	0
A0A087WYF2;F5H2F2;P54687;P54687-2;P54687-3;P54687-4;P54687-5	0	0	0	0	1	1	0	0	0	0	1
A0A087WYF7;Q6UXV4	0	1	0	0	0	0	0	1	0	0	0
A0A087WYJ2;M0QZR8;M0R2B7;P28340	0	1	0	0	0	0	0	0	0	0	0
A0A087WYL6;A0A087WZG6;A0A087X1S9;Q8TEW8;Q8TEW8-2;Q8TEW8-3;Q8TEW8-5;Q8TEW8-6;R4GN62	0	0	0	0	0	0	0	0	0	0	0
A0A087WYM1;C9JRR9;P42575;P42575-2;P42575-3	0	0	1	0	0	0	0	0	0	0	0
A0A087WYM3;A0A0A0MRF5;E7EWX6;Q8IXJ6;Q8IXJ6-2;Q8IXJ6-3;Q8IXJ6-4	0	0	0	0	0	0	0	0	0	0	0
A0A087WYM5;A0A494C058;A0A494C075;A0A494C0M8;A0A494C171;A0A494C1C3;Q9BVV6;Q9BVV6-2;Q9BVV6-3;Q9BVV6-4	0	0	0	0	0	0	0	1	0	0	0
A0A087WYN9;Q7Z478	0	0	0	1	0	0	0	0	0	0	0
A0A087WYP2;Q8IZQ5	0	0	0	0	0	0	1	0	0	0	0
A0A087WYR0;P09132	0	0	0	0	1	0	0	0	0	0	0
A0A087WYS3;Q9ULU4;Q9ULU4-10;Q9ULU4-11;Q9ULU4-12;Q9ULU4-13;Q9ULU4-19;Q9ULU4-22;Q9ULU4-7;Q9ULU4-8;Q9ULU4-9	0	0	0	0	0	0	1	0	0	0	0
A0A087WYT3;Q15185;Q15185-4	0	0	0	0	0	0	1	0	0	0	0
A0A087WYV9;A0A087X1F5;P57105	0	0	0	0	0	0	0	1	0	0	0
A0A087WYX8;A0A1W2PQW0;A0A590UJL7;A0A5F9ZH12;A0A5F9ZHT2;A0A6Q8PH73;Q14CM0	0	0	1	0	0	1	0	0	0	0	0
A0A087WYY0;A0A087X260;B1AKP7;G3V162;Q13148	0	1	0	0	0	0	0	0	0	0	0
A0A087WZ13;E9PAU2;Q8IY67;Q8IY67-2	0	0	0	0	0	0	1	0	0	0	0
A0A087WZ32;A8K727;Q9HB19	0	0	0	0	0	0	1	0	0	0	0
A0A087WZ40;Q14244;Q14244-6;Q14244-7	0	0	0	0	0	0	1	0	0	0	0
A0A087WZ50;Q8TCT7;Q8TCT7-2;Q8TCT7-4	0	0	0	0	0	0	1	0	0	0	0
A0A087WZ62;Q9H6U8;Q9H6U8-3	0	0	0	0	1	0	0	0	0	0	0
A0A087WZ97;A0A087WZK6;A0A087X2C2;Q5T7M9	0	0	0	0	0	0	0	0	1	0	0
A0A087WZB5	0	0	0	0	0	0	0	0	0	0	0
A0A087WZC1;Q6IN84;Q6IN84-2	0	1	0	0	0	0	0	1	0	0	0
A0A087WZC2;A0A0C4DGS8;E0YMJ8;P35680;P35680-2;P35680-3;P35680-4	0	1	0	0	0	0	0	0	0	0	0
A0A087WZE9	0	1	0	0	0	0	0	0	0	0	0
A0A087WZG4;A0A3B3IPE9;A0A590UK10;Q6ZSZ5;Q6ZSZ5-1;Q6ZSZ5-2;Q6ZSZ5-5;Q6ZSZ5-6	0	0	0	0	0	0	1	0	0	0	0
A0A087WZJ5	0	0	0	1	0	0	0	1	0	0	1
A0A087WZK0;M0R1T4;P49366;P49366-2;P49366-3	0	0	0	0	0	0	0	0	0	1	1
A0A087WZK9;B3KS98;O15372	1	0	0	0	0	1	0	0	0	0	0
A0A087WZM2;D6REQ6;D6RHI9;O00584	0	1	0	0	0	0	0	0	0	1	0
A0A087WZM8;Q8TBM7;Q8TBM7-2;Q8TBM7-3	0	0	0	0	1	0	0	0	0	0	1
A0A087WZN1;O43837	0	0	0	0	0	0	0	1	0	0	0
A0A087WZP9	0	0	0	0	1	0	0	0	0	0	1
A0A087WZQ7;Q9H115	0	0	0	0	0	0	0	0	1	0	1
A0A087WZT0;M0QY61;M0QZ22;M0R0X3;Q5PRF9	0	0	0	0	0	1	0	0	1	0	0
A0A087WZT2;Q6UX53	0	0	1	0	0	0	0	0	0	1	0
A0A087WZT3;Q9H3K6	0	0	0	0	0	0	1	0	0	0	0
A0A087WZU2;E5RGN0;Q00536;Q00536-2;Q00536-3	0	0	0	0	0	0	1	0	0	0	0
A0A087WZU5;O43657	0	0	0	0	0	1	0	0	0	0	0
A0A087WZV0;O43314	0	1	0	0	0	0	0	0	0	0	0
A0A087WZY2;A6NIV2;Q9P0U1	0	0	0	0	0	0	0	0	0	0	0
A0A087WZY5;A8MXH5;F5H3Q5;F5H851;Q14031;Q14031-2	0	0	0	0	0	0	0	0	1	0	0
A0A087X011;E9PES4;J3KPF9;Q9Y496	1	0	0	0	0	0	0	0	0	0	0
A0A087X020;Q9Y3A5	0	0	0	0	0	0	0	0	0	0	0
A0A087X080;A0A0U1RRH1;A0A0X1KG73;Q15413;Q15413-2;Q15413-3	0	0	1	0	0	0	0	0	0	0	0
A0A087X091	0	0	0	0	0	1	0	0	1	0	0
A0A087X0D5;P09668	0	0	0	0	0	0	0	0	0	1	0
A0A087X0F1;Q9UK61;Q9UK61-2;Q9UK61-3;Q9UK61-4	0	1	0	0	0	0	0	0	0	0	0
A0A087X0H7;A0A669KAW5;A0A669KB51;A0A6E1W401;Q8NEL9;Q8NEL9-2;Q8NEL9-3;Q8NEL9-4	0	0	1	0	0	0	0	0	0	0	0
A0A087X0H8;Q15714;Q15714-2;Q15714-3	0	0	0	0	0	0	1	0	0	0	0
A0A087X0H9;Q5T8P6	0	1	0	0	0	0	0	0	0	0	0
A0A087X0K0;P39059	0	1	0	0	0	0	0	1	0	0	0
A0A087X0K4;Q7Z408;Q7Z408-2;Q7Z408-4	0	1	0	0	0	0	0	0	0	0	1
A0A087X0K9	0	0	0	0	1	0	0	0	0	0	1
A0A087X0L7;E7EVY0;J3KNA0;Q15070;Q15070-2	0	0	0	0	0	0	0	1	0	0	0
A0A087X0M4;Q9BWU0	0	0	0	0	0	0	1	0	0	0	0
A0A087X0P0	0	1	0	0	0	0	0	0	1	0	0
A0A087X0Q9;Q9BVL4	0	0	0	0	0	0	1	0	0	0	0
A0A087X0R6;Q9UMY4;Q9UMY4-1	0	0	0	0	0	0	1	0	0	0	0
A0A087X0R7;Q9H4L4	0	1	0	0	0	0	0	0	0	0	0
A0A087X0R9;B8ZZK1;Q07837;Q07837-2;Q07837-5;Q07837-6;Q07837-7	0	0	0	0	1	0	0	0	0	0	1
A0A087X0S5;P12109	0	1	0	0	0	0	0	1	0	0	0
A0A087X0T5;Q96AB6	0	0	0	0	0	0	0	0	0	0	0
A0A087X0V5;P29728;P29728-2	0	0	0	0	0	0	0	0	0	0	0
A0A087X0W8;Q04206;Q04206-2;Q04206-3;Q04206-4;Q2TAM5	0	0	0	0	0	0	1	0	0	0	0
A0A087X0W9;Q8N6M0	1	0	0	0	0	0	0	0	0	0	0
A0A087X0X3;P52272;P52272-2	0	1	0	0	0	0	0	0	0	0	0
A0A087X0Y2;A0A087X248;A0A087X2I9;A0A096LPD8;F5GWV3;F5H3N7;F5H8B4;O14607;O14607-2;O14607-3;O14607-4;O14607-5	0	1	1	0	0	0	0	0	1	0	0
A0A087X108	0	0	0	0	0	0	1	0	0	0	0
A0A087X117;A0A0G2JN29;Q15155	0	0	0	1	0	0	0	1	0	0	0
A0A087X127	0	0	0	0	0	0	0	1	1	0	0
A0A087X138;Q8TF71	0	0	0	0	0	0	0	0	0	0	1
A0A087X1A8;A0A2R8Y3X7;D3VVH9;F5H211;G3V3R7;P54252;P54252-1;P54252-4	0	0	0	0	0	0	1	0	0	0	0
A0A087X1B2	0	1	0	0	0	0	0	0	0	0	0
A0A087X1B6;E9PEG3;F5GZG9;P10275;P10275-3;P10275-4	0	0	0	0	0	1	0	0	0	0	0
A0A087X1D0	0	1	1	0	0	0	0	0	1	0	0
A0A087X1E4;P53365;P53365-3	0	0	1	0	0	0	0	0	1	0	0
A0A087X1G1;H7BYD0;Q16718;Q16718-2	0	0	0	0	0	0	0	1	0	0	0
A0A087X1G4	0	1	1	0	0	0	0	1	0	0	0
A0A087X1J2	0	0	0	0	0	0	0	1	0	0	0
A0A087X1J7;P22352	0	0	0	1	0	0	0	0	0	0	0
A0A087X1K1;Q96C00	0	1	0	0	0	0	0	0	0	0	0
A0A087X1N0;Q9H3C7	0	0	1	0	0	0	0	0	1	0	1
A0A087X1N3;F8WC38;O75818;O75818-2	1	0	0	0	0	0	0	1	0	0	0
A0A087X1N7;P20929;P20929-2;P20929-3;P20929-4	0	0	0	0	0	0	0	0	0	0	0
A0A087X1P3;C9IYE1;F8W8P5;H7BYR4;Q86UW7;Q86UW7-2;Q86UW7-3	1	0	0	0	0	0	0	0	0	0	0
A0A087X1P5;J3KQ41;J3QT95;Q9H9Q2;Q9H9Q2-3	1	0	0	0	0	0	1	0	0	0	0
A0A087X1R3;A0A0C4DGX0;A6QL64;Q8N2N9	1	0	0	0	0	0	0	0	0	0	0
A0A087X1S3	0	0	0	0	0	0	0	0	1	0	1
A0A087X1U5;F5H7T0;F6RJM5;Q96S38;Q96S38-2	0	0	0	0	0	1	0	0	1	1	0
A0A087X1W8;A0A0A0MTJ8;Q9BY67;Q9BY67-3;Q9BY67-4;Q9BY67-5;X5DQS5	0	0	0	0	0	0	0	1	0	0	1
A0A087X1Z1;A0A0G2JPW5;A0A0G2JQX1;A0A0G2JSA7;Q96RT8;Q96RT8-2	0	0	0	0	0	0	0	0	1	1	1
A0A087X1Z3;Q9UL46	1	0	0	0	0	0	1	0	0	0	0
A0A087X236;A0A0A0MRE2;C9J2A8;Q9NVP4;Q9NVP4-2;Q9NVP4-3;Q9NVP4-4;Q9NVP4-5	0	0	0	1	0	0	0	1	0	0	1
A0A087X241;Q2NKQ1;Q2NKQ1-3;Q2NKQ1-4	0	0	1	0	0	0	0	0	1	0	0
A0A087X256;Q2M389	0	0	0	0	0	1	0	0	0	0	0
A0A087X266;Q9BXJ8	0	0	0	0	1	0	0	0	0	0	0
A0A087X279;P09913	1	0	0	0	0	0	1	0	0	0	0
A0A087X283;A0A1B0GX65;B7Z306;C9J180;C9J2P0;H7C061;P51965;P51965-2;P51965-3;Q969T4;Q96LR5;R4GN77;R4GND1	0	0	0	0	0	1	0	0	1	0	0
A0A087X294;O75914;O75914-2;O75914-3;O75914-4	0	0	0	0	0	0	1	0	0	0	0
A0A087X295;E9PDU5;Q9NNW5	1	0	0	0	0	0	0	0	0	0	0
A0A087X296;P23219;P23219-2;P23219-3;P23219-4;P23219-5;P23219-6	0	1	0	0	0	0	0	1	0	0	0
A0A087X2A7;H0YBA5;H7BY63;Q8NB25;Q8NB25-2;Q8NB25-3;Q8NB25-4	0	0	1	0	0	0	0	0	0	0	0
A0A087X2B2;E9PMH5;Q13490;Q13490-2	0	0	0	0	0	0	0	1	0	0	0
A0A087X2B5;P35613;P35613-2	0	0	0	0	1	0	0	0	0	0	1
A0A087X2D5;Q9BRJ2	0	1	0	0	0	0	0	1	0	0	0
A0A087X2D8;O60271-2;O60271-4	0	0	1	0	0	0	0	0	1	0	0
A0A087X2G6;A0A0C4DGU5;D6RIC3;Q9Y3C1;Q9Y3C1-2;Q9Y3C1-3	0	1	0	0	0	0	0	1	0	0	0
A0A087X2I1;P62333	1	0	0	0	0	0	0	0	0	0	0
A0A088AWN3;A0A0A0MSY4;Q9BZ29;Q9BZ29-3;Q9BZ29-4;Q9BZ29-5	0	0	0	0	0	0	0	1	0	0	0
A0A088AWN8;E7EP87;E9PH27;J3KS48;J3KT43;J3QRB0;Q9UHQ1;Q9UHQ1-2;Q9UHQ1-3;Q9UHQ1-4	0	0	0	0	0	1	0	0	1	0	0
A0A088AWP2;A0A0C4DG41;A8MX39;A8MZ24;B5MDW0;P11308;P11308-1;P11308-2;P11308-3;P11308-5;P11308-6	0	1	1	0	0	0	0	0	0	0	0
A0A088AWP5;E9PDC2;H7BZH9;Q8WUY3;Q8WUY3-2;Q8WUY3-3;Q8WUY3-4	1	0	0	0	0	1	0	0	0	0	0
A0A090HNM7;A0A1W2PS85;P28715;R4GMW8	0	0	0	0	0	0	0	0	0	0	0
A0A096LNH6;Q14185	0	1	0	0	0	0	0	0	0	0	0
A0A096LNV3;A0A096LP02;Q9Y508;Q9Y508-2	1	0	0	0	0	1	0	0	0	0	0
A0A096LP07;A0A096LPJ3;A8K070	0	0	0	1	0	0	0	1	0	0	1
A0A096LP22;A0A096LP34;C9J7Z1;Q86Y79	0	0	0	0	0	0	0	1	0	0	0
A0A096LP69	0	0	1	0	0	0	0	0	0	0	1
A0A096LPC5;A0A0A0MR88;Q9Y4E1;Q9Y4E1-1;Q9Y4E1-2;Q9Y4E1-6	0	0	0	0	0	0	0	0	1	0	0
A0A096LPE2	0	0	1	0	0	0	0	0	0	1	0
A0A096LPI6	0	0	0	0	0	0	0	1	0	0	0
A0A096LPJ4;P05161	0	0	0	0	0	0	1	0	0	0	0
A0A096LPJ9;A0A140G945;A0A140G945-2;E7EWH7;P02489	0	0	0	0	0	0	0	0	0	0	0
A0A0A0MQR2;Q9BY42	0	0	0	0	0	0	1	0	0	0	0
A0A0A0MQR4;I3L2J0;Q96RK0	0	0	0	0	0	0	1	0	0	0	0
A0A0A0MQS1;Q53H96;Q53H96-2	1	0	0	0	0	0	1	0	0	0	0
A0A0A0MQS9;A0A0A0MTC7;Q16363;Q16363-2	0	1	0	0	0	0	0	1	0	0	0
A0A0A0MQT0;P09455	0	0	0	0	0	0	1	0	0	0	0
A0A0A0MQU0;Q9BV38;U3KQC1	0	1	0	0	0	0	0	0	0	0	0
A0A0A0MQU4;Q96I15	0	0	0	0	0	0	1	0	0	0	0
A0A0A0MQU7;A0A0A0MTK8;F5H0K0;P20823;P20823-2;P20823-3;P20823-7;U3KQS6	0	1	0	0	0	0	0	0	0	0	0
A0A0A0MQV6;P09038;P09038-1;P09038-2;P09038-3	0	1	0	0	0	0	0	0	0	0	1
A0A0A0MQV8	0	0	0	0	0	0	0	0	0	1	1
A0A0A0MQX1;D6RGD1;Q9HD67	0	0	0	0	0	0	0	0	0	0	1
A0A0A0MQX8;C9JP00;Q9NR56;Q9NR56-2;Q9NR56-5;Q9NR56-6;Q9NR56-7	0	1	0	0	0	0	0	0	0	1	0
A0A0A0MQY7;A0A3B3ISH2;Q5VU97	0	0	0	0	0	0	0	0	0	0	0
A0A0A0MR02;P45880;P45880-1;P45880-2	0	0	0	0	0	0	0	1	0	0	0
A0A0A0MR03;A0A0J9YWB6;A0A0J9YWJ4;K7EJD2;Q9Y5B0;Q9Y5B0-4	0	0	0	0	0	0	1	0	1	0	0
A0A0A0MR05;H3BM50;H3BN58;H3BPT1;H3BPU5;Q9BVC4;Q9BVC4-4;Q9BVC4-5	1	0	0	0	0	1	0	0	1	0	0
A0A0A0MR07;F5H5P4;P15498;P15498-2;Q96D37	1	0	0	0	0	0	0	0	0	0	0
A0A0A0MR09;P43378	0	0	1	0	0	0	0	0	0	0	0
A0A0A0MR11;A0A0A0MRS1;Q06730;Q06730-2;Q06730-3	1	0	0	0	0	0	0	0	1	0	0
A0A0A0MR25;A0A5S6RJB7;D2CGD1;E7EVR7;H7BXU9;H7C265;P21802;P21802-15;P21802-16;P21802-17;P21802-18;P21802-2;P21802-20;P21802-21;P21802-22;P21802-23;P21802-3;P21802-4;P21802-5;P21802-6;P21802-8;S4R381	0	1	1	0	0	0	0	0	0	0	1
A0A0A0MR36;Q9ULV0-2	0	0	0	0	0	0	0	0	1	0	1
A0A0A0MR51;H7C2V0;O60427	0	0	0	0	1	0	0	0	0	0	1
A0A0A0MR67;A0A0A0MSA1;E9PDI6;F5GY28;F5H522;Q13936;Q13936-10;Q13936-11;Q13936-12;Q13936-13;Q13936-14;Q13936-15;Q13936-16;Q13936-17;Q13936-18;Q13936-19;Q13936-2;Q13936-20;Q13936-21;Q13936-22;Q13936-23;Q13936-24;Q13936-25;Q13936-26;Q13936-27;Q13936-28;Q13936-29;Q13936-3;Q13936-30;Q13936-31;Q13936-32;Q13936-33;Q13936-34;Q13936-35;Q13936-36;Q13936-37;Q13936-4;Q13936-5;Q13936-6;Q13936-7;Q13936-8;Q13936…	1	0	0	0	0	0	0	0	1	0	0
A0A0A0MR74;O75907	0	0	0	0	1	0	0	1	1	0	0
A0A0A0MR93;A0A0C4DH11;K7ELZ7;K7ES91;Q53F39;Q53F39-2;Q53F39-3	0	0	0	0	0	0	0	0	1	0	1
A0A0A0MRA5;B7Z4B8;M0R3F1;Q9BUJ2;Q9BUJ2-2;Q9BUJ2-4	0	1	0	0	0	0	0	0	0	0	0
A0A0A0MRA8;A8K968;Q9Y2J2;Q9Y2J2-2	0	0	0	1	0	0	0	0	0	0	1
A0A0A0MRB5;Q8WXG6;Q8WXG6-2;Q8WXG6-3;Q8WXG6-4;Q8WXG6-5;Q8WXG6-6;Q8WXG6-7;Q8WXG6-8	0	0	0	0	0	0	1	0	1	0	0
A0A0A0MRD0;A0A2R8YCE3;F5H4B4;F5H4B4-2	0	0	0	0	0	0	0	0	0	0	0
A0A0A0MRE5;Q9ULH1;Q9ULH1-2	0	1	0	0	0	0	0	0	0	0	0
A0A0A0MRF6;Q99996;Q99996-1;Q99996-3;Q99996-5;Q99996-6	0	0	0	0	0	0	1	0	0	0	0
A0A0A0MRF9;P16885	1	0	0	0	0	0	1	0	0	0	0
A0A0A0MRG8;Q16611	0	0	0	0	0	0	0	1	0	0	0
A0A0A0MRG9;B1AMJ5;Q5JTU8;Q96SN8;Q96SN8-2;Q96SN8-3;Q96SN8-4	0	0	0	0	0	0	0	0	0	0	1
A0A0A0MRH3;Q9Y2W7;Q9Y2W7-2;Q9Y2W7-3	0	1	0	0	0	0	0	0	1	1	0
A0A0A0MRI1;Q8IXQ4	0	0	0	0	0	0	0	0	0	0	0
A0A0A0MRI2;Q9UNH7	0	0	0	0	0	0	1	0	0	0	0
A0A0A0MRJ0;Q5VT25;Q5VT25-2;Q5VT25-3;Q5VT25-4;Q5VT25-5;Q5VT25-6	0	0	1	1	0	0	0	0	0	0	1
A0A0A0MRJ6	0	0	0	0	0	0	1	0	0	0	0
A0A0A0MRJ7;P12259	0	0	0	0	1	0	0	0	0	1	0
A0A0A0MRJ8;Q7Z6I6;Q7Z6I6-3	0	0	1	0	0	1	0	0	0	0	1
A0A0A0MRM2;Q86VF7;Q86VF7-2;Q86VF7-3;Q86VF7-4	0	0	1	0	0	1	0	0	0	0	0
A0A0A0MRM9;Q14978;Q14978-2;Q14978-3	0	1	0	0	0	0	0	0	0	0	0
A0A0A0MRP6;B7ZLQ5;P28370;P28370-2	0	1	0	0	0	0	0	0	0	0	0
A0A0A0MRR7;P09234	0	1	0	0	0	0	0	0	0	0	0
A0A0A0MRT2;Q9BTA9;Q9BTA9-2;Q9BTA9-5	1	1	0	0	0	0	0	0	0	0	0
A0A0A0MRT6;Q8IZP0;Q8IZP0-2;Q8IZP0-3;Q8IZP0-4;Q8IZP0-5;Q8IZP0-6;Q8IZP0-9	0	0	0	0	0	0	0	0	0	0	0
A0A0A0MRW6;Q9H6R4;Q9H6R4-2;Q9H6R4-4	0	1	0	0	0	0	0	0	0	0	0
A0A0A0MRX1;A0A0R4J2E6;A0A494C0F8;A0A494C147;A0A494C1D9;B1APY9;P26378;P26378-1;P26378-2;P26378-3;P26378-4;P26378-5;Q12926;Q12926-2	0	0	1	0	0	0	0	0	0	0	0
A0A0A0MRX8;A0A1B0GWI9;A0A1B0GWJ4;A0A2R8Y7V8;O00712;O00712-4;O00712-5;Q5VW26;Q5VW27;Q5VW30;U3KQE8	0	1	0	0	0	0	0	0	0	0	0
A0A0A0MRY0;B0QYI1;Q8WUA7;Q8WUA7-2;Q8WUA7-3;Q8WUA7-4	1	0	0	0	0	0	1	0	0	0	0
A0A0A0MRZ1;Q9H9P5-1;Q9H9P5-3	0	0	1	0	0	0	0	0	0	0	0
A0A0A0MRZ4;E7EMV7;Q15025;Q15025-2;Q15025-3;Q15025-4;Q15025-5;Q15025-6;Q15025-7;Q15025-8	0	0	0	0	0	0	0	0	1	0	0
A0A0A0MS14	1	0	0	0	0	0	1	0	0	0	0
A0A0A0MS59;A0A0C4DFX4;Q6ZRS2;Q6ZRS2-2;Q6ZRS2-3	0	1	0	0	0	0	0	0	0	0	0
A0A0A0MS79;O14513	0	1	1	0	0	0	0	0	0	0	0
A0A0A0MS87	0	0	0	0	0	0	1	0	0	0	0
A0A0A0MS99;I3L4X2;P33527;P33527-2;P33527-3;P33527-5;P33527-9	0	1	0	0	0	0	0	0	0	0	1
A0A0A0MSA9;A0A0C4DG49;P15151;P15151-2;P15151-3;P15151-4	0	0	0	0	0	0	0	0	0	0	1
A0A0A0MSB4;Q6ZN50;Q969R2;Q969R2-2;Q969R2-3;Q969R2-6	0	0	1	0	0	0	0	0	0	0	0
A0A0A0MSB8;Q9UPT5;Q9UPT5-1;Q9UPT5-2;Q9UPT5-5;Q9UPT5-6	0	0	0	0	0	0	0	0	0	0	0
A0A0A0MSD0;Q4LDE5;Q4LDE5-3	0	0	0	0	1	0	0	0	1	0	0
A0A0A0MSE3;D3DNG8;P30556	0	0	0	0	1	0	0	0	0	0	1
A0A0A0MSG0;A6NGB9	0	0	0	0	0	0	1	0	0	0	0
A0A0A0MSH9;A0A494C1F7;A0A494C1P7;Q86WJ1;Q86WJ1-2;Q86WJ1-4	0	1	0	0	0	0	0	0	1	0	0
A0A0A0MSI2;B3KPJ4;Q8IXK0;Q8IXK0-2;Q8IXK0-3;Q8IXK0-4;Q8IXK0-5	0	0	0	0	0	0	1	0	0	0	0
A0A0A0MSI6;B7Z1P2;Q9H4M3;Q9H4M3-2	1	0	0	0	0	1	0	0	1	0	0
A0A0A0MSI8;O00471	0	0	0	1	0	0	0	0	0	0	0
A0A0A0MSJ9;Q15283;Q15283-2	0	0	0	0	0	0	0	0	0	1	0
A0A0A0MSK3;A0A0C4DH47;A0A498U6I9;C9JS68;P24557;P24557-2;P24557-3;P24557-4;Q53F23	0	1	0	0	0	0	0	0	0	0	0
A0A0A0MSK6;Q13017;Q13017-2	0	0	0	0	0	0	0	0	0	0	0
A0A0A0MSL1;Q8TDM6;Q8TDM6-2;Q8TDM6-3;Q8TDM6-4	0	0	0	0	0	0	0	0	0	0	0
A0A0A0MSM0	0	0	0	0	0	0	0	0	0	0	0
A0A0A0MSP4;Q86WC4	0	0	0	0	0	0	0	0	1	1	0
A0A0A0MSQ0;P13797;P13797-2	0	0	0	0	0	0	1	0	0	0	0
A0A0A0MSS0;P60880	0	0	0	0	1	0	0	0	0	0	1
A0A0A0MSS7	0	0	0	1	0	0	0	1	0	0	1
A0A0A0MSS8;P42330	0	0	0	0	0	0	1	0	0	0	0
A0A0A0MST8;C9JRP1;E9PFN4;Q9Y6M7;Q9Y6M7-12;Q9Y6M7-13;Q9Y6M7-2;Q9Y6M7-6;Q9Y6M7-7;Q9Y6M7-8;Q9Y6M7-9	0	0	0	0	0	0	0	0	0	0	1
A0A0A0MSU4;O94911-3	0	0	0	0	1	0	0	0	0	0	0
A0A0A0MSV9;A0A0G2JH37;A0A0G2JKZ1;A2AB90;O15533;O15533-2;O15533-3	0	0	0	0	1	0	0	0	0	0	1
A0A0A0MSW2;E9PEI2;Q9BQW3;Q9BQW3-1	0	0	1	0	0	0	0	0	1	0	0
A0A0A0MSX9;P41252	1	0	0	0	0	1	0	0	0	0	0
A0A0A0MSY7;O00142;O00142-4;O00142-6	0	0	0	0	0	0	0	1	0	0	0
A0A0A0MSZ9;Q05048	0	1	0	0	0	0	0	0	0	0	0
A0A0A0MT02;A2ABK4;P18615;P18615-3	0	1	0	0	0	0	0	0	0	0	0
A0A0A0MT16;Q86UQ4;Q86UQ4-3;Q86UQ4-4	0	0	0	0	0	0	0	0	0	0	1
A0A0A0MT32;P38571;P38571-2	0	1	0	0	0	0	0	0	0	0	0
A0A0A0MT35;A0A2P0CTB1;Q8TBF2;Q8TBF2-3	0	0	0	0	0	0	0	0	0	0	0
A0A0A0MT61;G5E979;H7BYM2;Q8WYN0;Q8WYN0-3;Q8WYN0-5	0	0	1	1	0	0	0	0	0	0	0
A0A0A0MT72;C9JUH3;Q9BSQ5;Q9BSQ5-2;Q9BSQ5-3	0	0	0	0	0	1	0	0	1	0	0
A0A0A0MT83;P26440	0	0	0	0	0	0	0	1	0	0	0
A0A0A0MT93	0	1	0	0	0	0	0	0	1	0	0
A0A0A0MTC2;D6RA37;D6RDV0;D6RIY7;Q13454;Q13454-2	0	1	0	0	1	0	0	1	0	0	0
A0A0A0MTG5;P13232;P13232-2;Q5FBX5	0	1	0	1	0	0	0	0	0	0	0
A0A0A0MTH2;A0A0A0MTK6	0	0	0	0	0	1	0	0	1	0	0
A0A0A0MTH3	0	0	0	1	1	0	0	0	0	0	0
A0A0A0MTH9;O14981	1	0	0	0	0	1	0	0	1	0	0
A0A0A0MTJ9;Q6PIU2;Q6PIU2-2	0	0	0	0	1	0	0	0	0	0	0
A0A0A0MTK0;A0A0A0MTP0;F5GWB1;Q7Z6B0;Q7Z6B0-2	0	0	0	0	0	0	1	0	0	0	0
A0A0A0MTK4;A0A1B0GTZ1;Q8NB59;Q8NB59-2;Q8NB59-3;Q8NB59-5;Q8NB59-6;Q8NB59-7	0	0	0	0	0	0	0	1	1	0	0
A0A0A0MTL6;Q6ZS17;Q6ZS17-2;Q6ZS17-3;Q6ZS17-4	1	0	0	0	0	1	0	0	0	0	0
A0A0A0MTL7;A0A0D9SGH8;C6ZRJ6;C6ZRJ7;C6ZRK5;E2GH26;Q5JRY3;Q5JRY4;Q5JRY5;Q5VVR7;Q9NQB0;Q9NQB0-10;Q9NQB0-11;Q9NQB0-12;Q9NQB0-13;Q9NQB0-14;Q9NQB0-15;Q9NQB0-16;Q9NQB0-17;Q9NQB0-2;Q9NQB0-3;Q9NQB0-4;Q9NQB0-5;Q9NQB0-6;Q9NQB0-7;Q9NQB0-8;Q9NQB0-9	0	1	0	0	0	0	0	1	0	0	1
A0A0A0MTN0;Q13617;Q13617-2	1	0	0	0	0	0	1	0	0	0	0
A0A0A0MTN3	0	0	1	0	0	0	1	0	0	0	0
A0A0A0MTP7;F8VXG7;Q99590;Q99590-2	0	1	0	0	0	0	0	0	0	0	0
A0A0A0MTQ3;Q96N23;Q96N23-2	0	1	0	0	0	0	0	1	0	0	0
A0A0A0MTQ8;P0C221	0	0	0	0	0	0	0	1	1	0	0
A0A0A0MTR7;Q63HN8	1	0	0	0	0	1	0	0	0	0	0
A0A0A0MTS7;Q8WZ42;Q8WZ42-12;Q8WZ42-13;Q8WZ42-2;Q8WZ42-8	0	1	0	0	0	0	0	1	0	0	0
A0A0A0MTS9;K7EKZ0;K7EP24;K7ER94;Q2V2M9;Q2V2M9-2;Q2V2M9-3;Q2V2M9-4	0	1	0	0	0	0	0	0	0	0	1
A0A0A0MTU3;Q4ZIN3;Q4ZIN3-2	0	0	0	0	1	0	0	0	1	0	0
A0A0A6YYA0;Q86XR7-2;Q9Y3B3;Q9Y3B3-2	0	0	0	0	0	0	0	0	1	0	0
A0A0A6YYC0;E9PJN1;O75676;O75676-2	1	0	0	0	0	0	0	0	0	0	0
A0A0A6YYC7;Q96JP5;Q96JP5-2	0	0	0	0	0	0	1	0	0	0	0
A0A0A6YYG9;F8WCF6;F8WDD7;P59998;P59998-2;P59998-3	1	0	0	0	0	0	1	0	0	0	0
A0A0A6YYH1;Q7Z6K5;Q7Z6K5-2	0	0	0	0	0	0	1	0	0	0	0
A0A0A6YYI3;A0A0B4J1V8;A8MV53;Q9NQ55;Q9NQ55-2;Q9NQ55-3	0	1	0	0	0	0	0	0	0	0	0
A0A0A6YYL2;P0DMM9;P0DMM9-3;P0DMN0	0	0	0	0	0	0	1	0	0	0	0
A0A0A6YYL4;P57737-3	0	0	0	1	0	0	0	1	0	0	0
A0A0B4J1R2;Q9H6R3	0	0	0	0	0	0	0	1	0	0	0
A0A0B4J1R4;P32754	0	0	0	0	0	0	1	0	0	0	0
A0A0B4J1R7;Q96B45	0	0	0	0	0	0	0	0	0	0	0
A0A0B4J1S8;Q9UBF8;Q9UBF8-2;Q9UBF8-3	0	0	0	0	0	1	0	0	0	0	0
A0A0B4J1W0;B9TX62;F5GY88;H0YEG1;O75448;O75448-2	0	1	0	0	0	0	0	0	0	0	0
A0A0B4J1Y2;Q8NDW8;Q8NDW8-3;Q8NDW8-5;Q8NDW8-6;Q8NDW8-7	0	0	0	1	1	0	0	0	0	0	0
A0A0B4J1Z1;C9JAB2;Q16629;Q16629-2;Q16629-3;Q16629-4	0	1	0	0	0	0	0	0	0	0	0
A0A0B4J221;E9PR99;Q96LU5	0	0	1	0	0	0	0	1	0	0	0
A0A0B4J269	1	0	0	0	0	0	0	0	0	0	0
A0A0B4J291;Q8N8U2	0	0	0	0	0	0	0	0	1	0	0
A0A0B4J294;H3BP13;Q9UL33;Q9UL33-2	0	0	0	0	0	1	0	0	0	0	0
A0A0B4J297;I3L4V0;Q9BRA0;Q9BRA0-2	0	0	0	0	1	0	0	0	0	0	0
A0A0B4J2A0	0	0	0	0	0	0	1	0	0	0	0
A0A0B4J2C2;F8WF49;Q9Y2H0;Q9Y2H0-1;Q9Y2H0-3	0	0	0	0	0	0	1	0	0	0	0
A0A0B4J2C3;J3KPG2;P13693;Q5W0H4	0	0	0	0	0	0	1	0	0	0	0
A0A0B4J2D5;P0DPI2	0	0	0	0	0	0	0	1	0	0	0
A0A0B4J2E5;Q15269	0	1	0	0	0	0	0	0	0	0	0
A0A0B4J2F0	0	0	0	0	0	0	0	1	0	0	0
A0A0B4J2F8;E2QRJ6;F6S314;P52435	0	1	0	0	0	0	0	0	0	0	0
A0A0B4J2G4;Q15345;Q15345-3	0	1	0	0	0	1	0	0	0	0	0
A0A0C3SFZ9;M0QXD1;M0QY09;M0QZE1;M0QZI3;M0R1K4;M0R3E5;O14526;O14526-2;O14526-3	0	0	0	0	0	1	0	0	1	0	0
A0A0C4DFL7;Q16850	0	0	0	0	1	0	0	0	0	0	0
A0A0C4DFL8;F5GX28;O94953	0	1	0	0	0	0	0	0	0	0	0
A0A0C4DFM1;Q92544	0	0	0	0	0	1	0	0	1	0	0
A0A0C4DFM7;Q5TAX3	1	0	0	0	0	1	0	0	0	0	0
A0A0C4DFP6;Q5T4F6;Q9NQ79;Q9NQ79-2;Q9NQ79-3	0	0	0	0	0	0	0	1	0	0	0
A0A0C4DFP7;Q9BXJ1;Q9BXJ1-2	0	0	0	1	0	1	0	0	0	0	1
A0A0C4DFR1;O75069;O75069-2;O75069-3;O75069-5	1	0	0	0	0	0	0	0	0	0	0
A0A0C4DFU4;Q9HBG7-4	1	0	0	0	0	0	0	0	0	0	0
A0A0C4DFV0;Q9H469	0	0	0	0	0	0	1	0	0	0	0
A0A0C4DFW4;Q5JUR7	0	1	0	0	0	0	0	0	0	0	0
A0A0C4DFX2;A0A286YFA9;A0A2R8Y5V8;A0A2R8YCY2;Q5TBA9	1	0	0	0	0	0	0	0	0	0	0
A0A0C4DFX9;Q9H3P2	0	1	0	0	0	0	0	0	0	0	0
A0A0C4DFY5;A8MXZ4;J9JIE0;Q9NQ84;Q9NQ84-2	0	1	0	0	0	0	0	0	0	0	1
A0A0C4DFY7;Q6UWW8;Q6UWW8-2	0	1	0	0	0	0	0	0	1	0	1
A0A0C4DFZ2;P15289;P15289-2	0	0	0	0	0	0	0	0	0	1	0
A0A0C4DG02;F8WE91;Q9Y6K1;Q9Y6K1-2	0	1	0	0	0	0	0	0	0	0	0
A0A0C4DG17;C9J9K3;P08865	0	0	0	1	1	0	0	0	0	0	0
A0A0C4DG21;A0A7D9NKC8;E7EP65;E7EW77;E9PEZ7;F8WAL6;Q9NYB9;Q9NYB9-2;Q9NYB9-4	0	0	1	0	0	0	0	0	1	0	1
A0A0C4DG26;Q9NP71;Q9NP71-2;Q9NP71-3;Q9NP71-4;Q9NP71-6	0	0	0	0	0	0	0	0	1	0	0
A0A0C4DG40;Q8NF91;Q8NF91-4	0	0	0	0	0	0	0	0	0	0	0
A0A0C4DG51;Q9NP80;Q9NP80-3	0	0	0	1	0	0	0	1	0	0	0
A0A0C4DG60;F8W7P9;Q9H903;Q9H903-1;Q9H903-3;Q9H903-5	0	1	0	1	0	0	0	0	0	0	0
A0A0C4DG62;F5GYV5;F8WCT1;H7BZV4;Q66PJ3;Q66PJ3-2;Q66PJ3-3;Q66PJ3-4;Q66PJ3-7	0	1	0	0	0	0	0	0	0	0	0
A0A0C4DG80;Q9P2N7;Q9P2N7-2;Q9P2N7-3;Q9P2N7-4;Q9P2N7-5	1	0	0	0	0	0	0	0	1	0	0
A0A0C4DG85;P40394;P40394-2	0	0	0	0	0	0	1	0	0	0	0
A0A0C4DG88;P14859;P14859-2;P14859-3;P14859-4;P14859-5;P14859-6	0	1	0	0	0	0	0	0	0	0	0
A0A0C4DG89;Q7L014	0	1	0	0	0	0	0	0	0	0	0
A0A0C4DG90;A4D0S4;A4D0S4-3	0	1	0	1	0	0	0	0	0	0	0
A0A0C4DG91;A0A2R8Y7V2;C9J9V6;C9JQB1;O75414	0	0	0	0	0	0	0	1	0	0	0
A0A0C4DG94	0	0	0	0	1	0	0	0	0	0	1
A0A0C4DG95;C9IYJ2;E9PD56;F8WDF7;H7BYG4;Q7Z7A4;Q7Z7A4-2;Q7Z7A4-4;Q7Z7A4-6;W5RWE6	0	1	0	0	0	0	0	0	1	0	0
A0A0C4DGA2;O75521;O75521-2	0	0	0	0	0	0	0	1	0	0	0
A0A0C4DGA6;Q14527;Q14527-2	0	1	0	0	0	0	0	0	0	0	0
A0A0C4DGA7;O94929;O94929-3	0	1	0	0	0	0	0	0	0	0	1
A0A0C4DGB0;Q9UIL1;Q9UIL1-2;Q9UIL1-3	0	0	0	0	0	0	1	0	0	0	0
A0A0C4DGB9	0	0	0	0	0	0	0	1	0	0	0
A0A0C4DGE4;A0A0J9YW33;A0A286YF28;Q13277;Q13277-2;Q13277-3	0	0	0	0	1	0	0	0	0	1	1
A0A0C4DGE7;Q86UK5;Q86UK5-2;Q86UK5-3	0	0	0	0	0	0	1	0	0	0	0
A0A0C4DGF7;Q6UXC1;Q6UXC1-2;Q6UXC1-3	0	1	1	0	0	0	0	1	0	0	0
A0A0C4DGG1;Q9UKS6	0	0	0	0	1	0	0	0	0	0	1
A0A0C4DGG9;A0A2R8Y212;A0A2R8Y425;A0A2R8Y521;A0A2R8Y5J0;A0A2R8YFK9;A0A2U3TZM0;F5GWX5;Q14839;Q14839-2	0	1	0	0	0	0	0	0	0	0	0
A0A0C4DGH0;Q5ZPR3;Q5ZPR3-3;Q5ZPR3-4	0	0	0	0	1	0	0	0	0	0	1
A0A0C4DGH6;A0JNW5	1	0	0	0	0	0	0	0	0	0	0
A0A0C4DGI4	0	1	0	0	0	0	0	0	0	0	0
A0A0C4DGM9;B7Z896;F5H3M2;Q9BVG8;Q9BVG8-2;Q9BVG8-4;Q9BVG8-5;Q9BVG8-6	0	1	0	0	0	0	0	1	0	0	1
A0A0C4DGN6;J3QRU8;Q9Y2X7;Q9Y2X7-3	0	0	0	0	0	0	0	1	0	0	0
A0A0C4DGP0;E7EU35;Q9UKF7-2	0	0	1	0	0	0	1	0	0	0	0
A0A0C4DGQ4;Q86W25	0	0	0	0	0	0	1	0	0	0	0
A0A0C4DGQ5;P04632	0	0	0	0	0	0	1	0	0	0	0
A0A0C4DGQ8;Q6IAN0	0	0	0	1	1	0	0	0	0	0	0
A0A0C4DGR2;M0QY25;M0QYH7;M0QYQ4;M0QZQ2;Q71SY5;Q71SY5-4;Q71SY5-5;Q71SY5-6;Q86YD1;Q86YD1-2	0	1	0	0	0	0	0	0	1	0	0
A0A0C4DGR5	0	1	0	0	0	0	0	0	0	0	0
A0A0C4DGS1;P39656;P39656-3	0	0	0	0	1	0	0	1	0	0	0
A0A0C4DGV4;E9PLX3;O43504;R4GMU8	0	0	0	0	0	0	0	0	0	1	0
A0A0C4DGZ4;Q9Y5U4	0	0	0	0	1	0	0	0	0	0	1
A0A0C4DH01;Q9NVU0;Q9NVU0-2;Q9NVU0-3;Q9NVU0-4;Q9NVU0-5	1	0	0	0	0	1	0	0	0	0	0
A0A0C4DH07;Q8N2S1;Q8N2S1-2;Q8N2S1-3	0	0	0	0	0	0	0	1	1	0	0
A0A0C4DH13;E5RG96;J3KQJ9;Q8N2E2	0	0	0	0	0	0	0	0	1	0	1
A0A0C4DH16;B8ZZS0;H7BXT7;Q9NYM9	0	0	0	0	0	0	0	0	1	0	0
A0A0C4DH36	0	1	0	0	0	0	0	0	1	0	0
A0A0C4DH65	1	0	0	0	0	1	0	0	0	0	0
A0A0D2X7Z3;Q49AN0;Q49AN0-2	0	0	0	0	0	0	0	0	1	0	0
A0A0D5XQ77;A0A0U5Q247;A0A140T8Z5;A0A140T981;A0A140T9R6;A0A140T9Y4;A0A140T9Z9;A0A140TA15;P01920;Q29967	0	0	1	0	1	0	0	0	0	0	1
A0A0D9SEI0;Q9P0P8	0	0	0	0	0	0	0	1	0	0	0
A0A0D9SEI3;A0A0D9SEN2;A0A0D9SER5;P21127;P21127-2;P21127-3;P21127-8	0	1	0	0	0	0	0	0	0	0	0
A0A0D9SEJ5;F5GY05;Q96EK7;Q96EK7-2	1	0	0	0	0	1	0	0	0	0	0
A0A0D9SEK1	0	0	0	1	0	0	0	0	0	0	0
A0A0D9SEN7;A0A2R8Y7Z3;I3L0L0;Q13950;Q13950-2;Q13950-3	0	1	0	0	0	0	0	1	0	0	0
A0A0D9SES8;H0YKN8;H0YKT5;H0YL70;H0YNI7;H0YNT2;Q04724;Q04726;Q04726-2;Q04726-3;Q04726-4;Q04726-5;Q04726-6;Q04726-7;Q04727;Q04727-2;Q04727-3;Q04727-4	1	0	0	0	0	0	0	0	0	0	0
A0A0D9SET2;A0A0D9SFD0;A0A0D9SGI5;A0A0R4J2G5;A0A1B0GTW4;A0A1B0GV32;D6R942;D6RB91;D6RC63;D6RCM6;D6RG14;D6RG21;D6RJA7;D6RJG6;D8L7E9;H0YM62;Q02078;Q02078-2;Q02078-3;Q02078-4;Q02078-5;Q02078-6;Q05BX2;Q06413;Q06413-2;Q06413-3;Q06413-4;Q06413-5;Q06413-6;Q14814;Q14814-2;Q14814-3;Q14814-4;Q14814-5;Q14814-6	0	1	0	0	0	0	0	0	0	0	0
A0A0D9SEU5;Q6VN20;Q6VN20-3;R4GMX8	1	0	0	0	0	0	0	0	0	0	0
A0A0D9SEX5;Q9H6R6;Q9H6R6-2	0	0	1	0	1	0	0	0	1	0	1
A0A0D9SEY1;E7EN19;E7ENQ1;G3XAA2;G5E948;H7C360;O95819;O95819-2;O95819-3;O95819-4;O95819-5;O95819-6	0	0	1	0	0	0	0	0	1	0	0
A0A0D9SF07	0	0	1	0	0	0	0	0	0	0	0
A0A0D9SF44;A0A0R4J2E2;Q9Y3T6;Q9Y3T6-3	0	0	0	0	0	0	1	0	0	0	0
A0A0D9SF53;A0A0D9SFB3;A0A0D9SG12;A0A2R8Y4A4;A0A2R8Y645;A0A2R8YCW1;A0A2R8YF78;A0A2R8YFR4;A0A2R8YFS5;A0A2U3TZJ9;O00571	0	0	0	0	0	0	0	0	0	0	0
A0A0D9SF60;Q99569;Q99569-2	0	1	0	0	0	0	0	0	0	0	1
A0A0D9SF63;Q9BZK7	0	1	1	0	0	0	0	0	0	0	0
A0A0D9SFB1	0	0	0	1	0	0	0	0	0	0	0
A0A0D9SFB5;P08319;P08319-2	0	0	0	0	0	0	1	0	0	0	0
A0A0D9SFE1;Q9H936	0	0	0	0	0	0	0	1	0	0	0
A0A0D9SFG6;O43739;O43739-2;Q15438;Q15438-2;Q15438-3;Q99418;Q99418-2	0	0	0	0	0	0	0	0	0	0	0
A0A0D9SFJ2;A0A1B0GWF1;A0A2R8Y5Y4;A0A2R8Y6P1;Q6ZU35	0	0	0	0	1	0	0	0	0	0	1
A0A0D9SFK2;Q92614;Q92614-3;Q92614-4	0	1	0	0	0	0	0	0	0	0	0
A0A0D9SFM0;Q149N8;Q149N8-4	0	0	1	1	0	0	0	0	0	0	1
A0A0D9SFR6;Q16760;Q16760-2;Q86XP1;Q86XP1-2;Q86XP1-3;Q86XP1-5	0	0	0	0	0	0	0	0	1	0	0
A0A0D9SFT8	0	0	0	0	0	0	0	0	1	0	0
A0A0D9SG52;Q6ZWI9	0	0	0	0	0	0	0	0	1	1	0
A0A0D9SG71;P49459;P49459-3	0	0	1	0	0	0	0	0	0	0	0
A0A0D9SG72;A0A1B0GTP9;A0A1B0GVQ5;A0A1B0GWF2;A0A2R8Y5D4;P61764;P61764-2	0	0	0	0	1	0	0	0	0	0	1
A0A0D9SG79;Q9NZ09;Q9NZ09-3;Q9NZ09-4	0	0	0	0	0	0	0	0	1	0	0
A0A0D9SG96;Q9ULB1-3	1	0	1	0	0	0	0	0	0	0	0
A0A0D9SGD6;B0QZE2;B7Z2J6;E7ENI9;E7EV75;Q15326;Q15326-2;Q15326-5	0	1	0	0	0	0	0	0	0	0	0
A0A0D9SGE8;Q5JRC6;Q8IWS0;Q8IWS0-2;Q8IWS0-3;Q8IWS0-4;Q8IWS0-5	0	0	0	0	1	0	0	0	1	0	1
A0A0D9SGF6;Q13813;Q13813-2	0	0	0	1	0	0	0	0	0	0	0
A0A0D9SGH0;A0A1B0GV11;Q92581;Q92581-2;Q92581-3	0	0	0	0	0	1	0	0	1	0	0
A0A0D9SGJ6;C9JFZ1;J3KPK1;J3KQV8;O43426;O43426-2;O43426-4	0	0	0	0	0	0	1	0	0	0	0
A0A0G2JH30;A0A0G2JPX0;A0A2R8YFP9;A6NK88;P49918;P49918-2	0	0	0	0	0	0	0	0	0	0	0
A0A0G2JH50;A0A0G2JIF0;A0A1W2PS56;A2BF26;Q5RIP0	0	0	0	0	0	0	0	0	0	0	0
A0A0G2JH68;O60610	1	0	0	0	0	0	1	0	0	0	0
A0A0G2JHC2;Q6NYC8	0	0	0	0	0	0	0	0	0	0	1
A0A0G2JHL0;A0A0G2JK44;A0A140T9E9;A0A140T9F7;A0A140T9V2;H0Y6K2;P25440;P25440-2;P25440-3;U3KQA6	0	1	0	0	0	0	0	0	0	0	0
A0A0G2JI43;A0A0G2JIJ2;A0A140T926;A0A140T9C9;A0A140T9I2;A0A140T9R0;A0A140T9R2;A0A140T9T8;A0A140T9U6;F6UB75;P28068	0	0	1	0	0	0	0	0	0	0	0
A0A0G2JIR1;A0A0G2JIS2;A0A0G2JK64;A0A0G2JRN8;A0A0G2JRR0;A2ABF8;A2ABF9;Q96KQ7;Q96KQ7-2	0	1	0	0	0	0	0	0	0	0	0
A0A0G2JIW1;P0DMV8;P0DMV9	0	0	0	0	0	0	1	0	0	0	0
A0A0G2JJD3;O95870	0	0	0	0	1	0	0	0	0	0	0
A0A0G2JJP1;Q9C019	0	0	0	0	0	0	0	0	0	1	0
A0A0G2JL52;A0A140T8Y0;A0A140TA35;B4E0K6;Q5ST30;Q5ST30-4	0	0	0	0	0	0	0	1	0	0	0
A0A0G2JLC7	1	0	0	0	0	1	0	0	0	0	0
A0A0G2JLK7	0	0	0	0	1	0	0	0	1	0	0
A0A0G2JLQ8;A0A0G2JLX3;A0A0G2JNC8;A0A0G2JP37;A0A0G2JPB6;A0A0G2JPQ2;F5H5B1;F5H7Q5;J3KN39;K7EJ90;K7ELX1;Q9NX02;Q9NX02-2;Q9NX02-3;Q9NX02-4	0	0	0	0	0	0	0	0	0	0	1
A0A0G2JM39;A0A0G2JN91;A0A0G2JNH1;M0QYD1	0	1	0	0	0	0	0	1	0	0	0
A0A0G2JM63;A0A0G2JNK3;A0A0G2JPH3;Q8WX94-2;Q8WX94-3	0	0	0	1	0	0	0	0	0	0	1
A0A0G2JM70;Q9NV79;Q9NV79-2;Q9NV79-3;V9GZ41	0	0	1	0	0	0	0	0	0	0	0
A0A0G2JMD2;A0A2R9YJI8	0	0	0	0	1	0	0	0	1	0	0
A0A0G2JMW3;A0A0G2JP44;Q9HBB8;Q9HBB8-2;Q9HBB8-4	0	0	0	0	0	0	0	0	1	1	0
A0A0G2JMX7;A0A0G2JPD5;A0A0G2JQJ7;A0A0G2JS76;P10636;P10636-6;P10636-7;P10636-8;P10636-9	0	0	0	0	0	0	0	0	1	1	0
A0A0G2JMZ6;O60282	0	1	0	0	0	0	0	0	1	0	0
A0A0G2JMZ8;Q16625	0	1	0	0	0	0	0	0	0	0	1
A0A0G2JN23;A0A0G2JQ38	0	1	0	0	0	0	0	0	0	0	1
A0A0G2JN42;A0A0G2JNJ8;Q6W4X9	0	0	1	0	0	0	0	0	1	0	0
A0A0G2JN53	0	0	0	0	0	0	0	1	0	0	0
A0A0G2JN84;P59817	0	0	0	0	0	1	0	0	1	0	0
A0A0G2JNW7;Q9Y666	0	0	0	0	1	0	0	0	0	0	1
A0A0G2JNZ2;A0A669KB89;Q14160	0	0	0	1	0	0	0	0	0	0	1
A0A0G2JPC8;B4DTC2;E7EPX8;E7ER82;Q8TC27	1	0	0	0	0	1	0	0	0	0	0
A0A0G2JPQ3;P17693;P17693-5;Q5RJ85;Q8MH48	0	0	1	0	0	0	0	0	0	0	1
A0A0G2JPZ6;A0A0J9YWU2;Q9H3Q3	0	0	0	0	1	0	0	1	0	0	0
A0A0G2JQ41;A0A1C7CYZ0;B7Z683;Q12979;Q12979-2;Q12979-4	0	0	1	0	0	0	0	0	1	0	0
A0A0G2JQC6;A0A0G2JQK9;A0A0G2JRT1;E7EWN1;Q99102-3	0	1	0	0	0	0	0	0	0	0	0
A0A0G2JRG1	0	0	0	0	0	0	0	1	0	0	0
A0A0G2JS52;Q01538;Q01538-2	1	0	0	0	0	0	0	1	0	0	0
A0A0J9YVP6;Q9UHX1-2	0	1	0	0	0	0	0	0	0	0	0
A0A0J9YVW4	0	0	1	0	0	0	1	0	0	0	0
A0A0J9YW18;F6RP06;Q12983	0	0	0	0	0	0	0	1	0	0	0
A0A0J9YW63	0	1	0	0	0	0	0	0	0	0	0
A0A0J9YW64;A6NIW2;Q5JSL3	0	0	0	0	0	1	0	0	1	0	1
A0A0J9YWD2;A0A0J9YX19;A0A0J9YXY6;A0A0J9YYK8;A0A1B0GTJ5;A0A1B0GU79;A0A1B0GUR8;A0A1B0GVR1;Q9UBY8	0	0	0	0	0	0	0	0	1	0	1
A0A0J9YWD5;A0A0J9YX88;A0A0J9YYB5;B7ZM65;E9PJ24;F8WEF5;Q9P1Y6;Q9P1Y6-2;Q9P1Y6-3	0	1	0	0	0	0	0	0	0	0	0
A0A0J9YWE1;A0A0J9YWN0	0	0	0	0	0	0	0	0	1	0	1
A0A0J9YWL0;Q9Y4K1	0	0	0	0	0	0	0	0	0	0	1
A0A0J9YWR7;A0A0J9YXE4;Q8N2F6;Q8N2F6-2;Q8N2F6-3;Q8N2F6-4	0	0	0	0	0	0	0	1	0	0	0
A0A0J9YWV4;O75154;O75154-2;O75154-3;X6RFI8	0	0	0	0	0	0	1	0	0	0	0
A0A0J9YX34;A0A6Q8PEY7;A0A6Q8PF18;A0A6Q8PF63;A0A6Q8PF74;A0A6Q8PFB0;A0A6Q8PFI4;A0A6Q8PFM2;A0A6Q8PFS5;A0A6Q8PFV0;A0A6Q8PFX3;A0A6Q8PG16;A0A6Q8PGE9;A0A6Q8PGG4;A0A6Q8PGL5;A0A6Q8PH06;A0A6Q8PHE9;A0A6Q8PHG4;A0A6Q8PHP4;A0A6Q8PHR6;C9J084;Q9C040;Q9C040-2	0	1	0	1	0	0	0	0	0	0	0
A0A0J9YX62;C9J2C4;O75190;O75190-2;O75190-3	0	0	0	0	0	0	0	0	0	0	0
A0A0J9YX66;A0A0J9YXJ0;A0A1B0GU44;A0A1B0GUN8;E9PC62;O95319;O95319-2;O95319-3;O95319-4;O95319-5;Q5VZZ6;V9GYD9	0	1	1	0	0	0	0	0	0	0	1
A0A0J9YXF2;Q15165;Q15165-1	0	0	0	0	1	0	0	0	0	0	0
A0A0J9YXM6;Q562E7	1	0	0	0	0	1	0	0	0	0	0
A0A0J9YXN7	0	0	1	0	0	0	0	0	0	0	0
A0A0J9YXT0;H7C5H6;Q9H0F7;Q9H0F7-2	1	0	0	0	0	1	0	0	0	0	0
A0A0J9YY17;A0A1C7CYW8;A0A669KB38;Q8IVF4	0	0	0	1	1	0	0	0	0	0	0
A0A0J9YY72;A0A1W2PQQ1;Q5HYW2	0	0	1	0	0	0	0	0	0	0	0
A0A0J9YYF0	0	1	0	0	0	0	0	1	0	0	0
A0A0J9YYF7;Q86T65;Q86T65-4	0	0	0	0	1	0	0	1	0	0	0
A0A0K0K1A5	1	0	0	0	0	1	0	0	0	0	0
A0A0R4J2E8;D6REM6;P43243	0	1	0	0	0	0	0	0	0	0	0
A0A0R4J2F3;P0DPB6	0	1	0	0	0	0	0	0	0	0	0
A0A0R4J2F6;Q12894;Q12894-2	0	0	0	0	0	1	0	0	0	0	0
A0A0S2Z4L3;A0A3B3ISJ1;G5E9F8;P07225	0	0	0	0	1	0	0	0	0	0	1
A0A0S2Z4L7;O60603	0	0	0	0	1	0	0	0	1	0	1
A0A0S2Z4Q7;A0A1W2PQQ6;A0A1W2PQR0;A0A1W2PR45;A0A1W2PRC6;A0A1W2PRD9;A0A1W2PRY1;A0A1X7SBT2;C9JYS9;Q9UNP4;Q9UNP4-2;Q9UNP4-3	0	0	0	0	0	0	0	0	1	0	0
A0A0S2Z5D0;A0A1B0GTU6;H3BUV4;Q9NWW5;Q9NWW5-2	0	0	0	0	1	0	0	0	0	0	1
A0A0U1RQC7	0	0	1	0	0	0	0	0	0	0	0
A0A0U1RQE4;A0A494C1M0;Q5HYK7;Q5HYK7-2;Q5HYK7-3	0	0	0	0	0	0	1	0	0	0	0
A0A0U1RQK7	0	0	0	0	0	0	0	0	0	0	0
A0A0U1RQK9	0	1	0	0	0	0	0	0	1	0	0
A0A0U1RQM0;H0YKX3;H0YMA4;Q15004	0	0	1	0	0	0	0	0	1	1	1
A0A0U1RQQ9;Q6P3W7	0	0	0	0	0	1	0	0	0	0	0
A0A0U1RQS4;A0A0U1RR93;Q9BYB0;Q9BYB0-3	0	0	1	0	0	0	0	0	0	1	1
A0A0U1RQT8;Q8TCZ2;Q8TCZ2-2;Q8TCZ2-3;Q8TCZ2-5	0	0	1	0	1	0	0	0	0	0	1
A0A0U1RQW6;E7EPU2;Q9Y2E4	0	0	0	0	0	0	0	0	0	0	0
A0A0U1RQY4	0	1	1	0	0	0	0	0	0	0	1
A0A0U1RR06;Q9Y484;Q9Y484-2;Q9Y484-3	0	0	0	0	0	0	1	0	0	0	0
A0A0U1RR16;A0A3B3IRZ7;Q8NEY4;Q8NEY4-2	0	0	0	0	0	0	0	0	0	0	0
A0A0U1RR25	1	0	0	0	0	1	0	0	1	0	0
A0A0U1RR27;H3BTW5;Q7Z401;Q7Z401-2	1	0	0	0	0	0	0	0	0	0	0
A0A0U1RR32;A0A0U1RRH7;P0C0S8;P20671;Q96KK5;Q99878;Q9BTM1	0	1	0	0	0	0	0	0	0	0	0
A0A0U1RR76;A6NJ78;A6NJ78-2;A6NJ78-4;P0C7V9	0	0	0	0	0	0	0	1	0	0	0
A0A0U1RRA6;B5MCG9;B5MCU0;H7C0E9;Q9Y2K5	0	0	0	0	0	0	1	0	0	0	0
A0A0U1RRB6;J3QT38;Q9Y2D4;Q9Y2D4-2	0	1	0	0	0	0	0	0	0	0	0
A0A0U1RRB9;F2Z2V1;Q96C11;Q96C11-3	0	0	0	0	0	0	1	0	0	0	0
A0A0U1RRK1;A0A286YF11;F6XEV2;Q9BPX6;Q9BPX6-3	0	0	0	0	0	0	0	1	0	0	0
A0A0U1RRL7	0	0	0	0	0	0	0	1	0	0	0
A0A0U1RRL8;Q8TB22;Q8TB22-2;Q8TB22-3	0	0	0	0	0	0	0	1	0	0	0
A0A0U1RRM1;Q8WXI9	0	1	0	0	0	0	0	0	0	0	1
A0A126GWB3;P47888	0	0	1	0	0	0	0	0	0	0	1
A0A140LJL2;Q8N350	1	0	1	0	0	0	0	0	0	0	0
A0A140T8Y3;A0A140T902;A0A140T9C0;A0A140TA33;A0A140TA41;A0A140TA52;A0A3B3ISX9;P22105;P22105-1;P22105-4	0	1	0	0	0	0	0	0	0	0	0
A0A140T913;A0A140T933;A0A140T955;A0A140T9I0;A0A140T9X5;A0A1W2PRT9;Q53Z42	0	0	0	0	1	0	0	0	0	0	1
A0A140T951	0	0	0	0	1	0	0	0	0	0	1
A0A140T962;A0A140T9B3;A0A140T9J9;A0A1W2PR11;Q5QT33	0	0	1	0	1	0	0	0	0	0	0
A0A140T9B9;A0A140T9N6;A0A140T9V9;H0Y551;P14373	0	0	0	0	0	0	0	0	1	1	1
A0A140T9G8;Q0P5T2;Q5SQH8;Q5SQH8-2;Q5SQH8-4	0	1	0	0	0	0	0	1	0	0	0
A0A140T9T7;Q03518	0	0	0	0	1	0	0	0	0	0	1
A0A140TA01;E9PQT8;E9PQZ5;O43189;O43189-2	0	0	1	0	0	1	0	0	0	0	0
A0A140TA09;Q99942	0	0	0	0	0	0	0	0	0	1	0
A0A140TA86;Q5XKP0	0	0	0	0	0	0	0	1	0	0	0
A0A140VK87;H0Y7R1;Q8TBZ2	0	1	0	0	0	0	0	0	1	0	0
A0A182DWF2;A0A182DWF3;Q9NNW7;Q9NNW7-2	0	0	0	0	0	0	0	1	0	0	0
A0A182DWH7;P49908	0	0	0	0	0	0	0	0	0	1	0
A0A182DWI4;E9PN30;Q9BQE4	0	0	0	0	1	0	0	0	0	0	1
A0A1B0GTB0;A0A1B0GTU8;A0A1B0GU12;A0A1B0GUT7;A0A1B0GVB9;A0A1B0GVC7;A0A1B0GVW0;A0A1B0GWJ8;A0A1C7CYW4;B7Z413;H7C3E1;O75787;O75787-2	0	0	0	0	1	0	0	0	0	0	1
A0A1B0GTF3;A0A6I8PIT5;A0A6I8PIW1;A0A6I8PLB1;O43301	0	1	0	0	0	0	0	0	0	0	1
A0A1B0GTG2;A0A1B0GW77;P49419;P49419-2	0	0	0	1	0	0	0	1	0	0	0
A0A1B0GTH8;A0A1B0GUV4	0	0	1	1	0	0	0	0	0	0	0
A0A1B0GTJ7;A0A1B0GWJ0;P30566	1	0	0	0	0	0	1	0	0	0	0
A0A1B0GTJ8;A0A1B0GV63;A0A1B0GVK1;A0A1B0GWJ2;A0A3F2YNW7;A0A6Q8NVI4;H0Y7H8;Q8NFD5;Q8NFD5-2;Q8NFD5-3;Q8NFD5-4	0	1	0	0	0	0	0	0	0	0	0
A0A1B0GTK6	0	0	0	0	0	0	0	0	0	0	0
A0A1B0GTL7;A0A1W2PQ11;A0A1W2PQ86;A0A1W2PQJ4;Q02246	1	0	0	0	0	0	0	0	0	0	0
A0A1B0GTM1;A0A1B0GUM5;E7ETX0;Q8NHX9	0	0	0	0	0	0	0	0	1	0	0
A0A1B0GTM3;A0A1B0GUA4;A0A1B0GUH5;A0A1B0GW68;Q13510;Q13510-2	0	0	0	0	0	0	0	0	0	1	0
A0A1B0GTT2	0	0	0	0	0	1	0	1	0	0	0
A0A1B0GTU3;Q96L93;Q96L93-2;Q96L93-4;Q96L93-5;Q96L93-6	0	0	1	0	0	0	0	0	1	0	1
A0A1B0GTU4	0	0	0	0	0	0	0	0	0	0	0
A0A1B0GTU5;H0Y488;O14497;O14497-2;O14497-3	0	1	0	0	0	0	0	0	0	0	0
A0A1B0GTU7;H0YD36;P54098	0	0	0	0	0	0	0	1	0	0	0
A0A1B0GTV6	0	0	0	0	0	0	0	1	0	0	0
A0A1B0GTW1;A0A2R8YDH4;A0A3B3ITE1;Q9UDY2;Q9UDY2-3;Q9UDY2-7	0	0	0	1	0	0	0	0	0	0	0
A0A1B0GTX1;A0A1C7CYY6;Q6XZF7;Q6XZF7-2	0	0	1	0	0	0	0	0	0	0	0
A0A1B0GU24;Q9HCJ0;Q9HCJ0-2	0	1	0	0	0	0	0	0	0	0	1
A0A1B0GUA3;A0A6Q8PGG2;A0A6Q8PH45;A0A6Q8PHL8;Q96EK5	1	0	0	0	0	0	0	0	0	0	0
A0A1B0GUC2;A0A1W2PP33;C9J7I0	0	0	0	0	0	0	0	0	1	0	0
A0A1B0GUF4	0	0	1	0	0	0	0	0	0	0	0
A0A1B0GUG6;Q86WH2	0	0	1	0	0	0	0	0	1	0	0
A0A1B0GUL3	0	0	1	0	0	0	0	0	1	0	0
A0A1B0GUL6;E9PEZ5;Q9UPP5;Q9UPP5-2	0	0	0	0	0	0	0	0	0	0	0
A0A1B0GUN5	0	1	1	0	0	0	0	0	0	0	0
A0A1B0GUN9	0	0	0	0	0	0	0	0	0	1	0
A0A1B0GUS7	0	0	1	1	0	0	0	0	0	0	0
A0A1B0GUZ2;P00797;P00797-2	0	0	1	0	0	0	0	0	0	0	0
A0A1B0GUZ7;Q14156;Q14156-2	0	0	0	0	1	0	0	0	0	0	1
A0A1B0GV26;Q8WWZ3;Q8WWZ3-2	0	0	1	0	0	0	0	0	0	0	0
A0A1B0GV47;Q7Z4S6;Q7Z4S6-2;Q7Z4S6-4;Q7Z4S6-5;Q7Z4S6-6	1	0	0	0	0	0	0	0	0	0	0
A0A1B0GV48;D6RBC4;Q8NAP3	0	0	0	0	0	0	0	0	1	0	1
A0A1B0GV57;Q9NYJ8	1	0	0	0	0	0	0	0	0	0	0
A0A1B0GV71;A0A1B0GW34;A0A1B0GWD3;B4DFF3;H3BNK7;H3BR00;O95086;Q13286;Q13286-2;Q13286-3;Q13286-4;Q13286-5;Q13286-7;Q2TA70;Q9UBD8	0	0	0	0	0	1	0	0	1	0	0
A0A1B0GVD5;A0A1B0GVP3;A0A1B0GW44;A0A1B0GWE8;P07339	0	0	0	0	0	0	0	0	0	1	0
A0A1B0GVG4	0	0	0	0	0	0	0	0	0	0	0
A0A1B0GVI7;A0A2R8Y7G1;P35869	0	0	0	0	0	0	1	0	0	0	0
A0A1B0GVL3;Q05086;Q05086-2;Q05086-3	1	0	0	0	0	0	0	0	0	0	0
A0A1B0GVV3;Q5EBL4	0	0	0	0	0	0	1	0	0	0	0
A0A1B0GVV8	0	0	0	0	0	0	0	0	0	0	0
A0A1B0GW05	0	0	0	0	1	0	0	1	0	0	0
A0A1B0GW23;Q03154	0	0	0	0	0	0	1	0	0	0	0
A0A1B0GW38	0	0	0	0	0	0	0	0	0	0	0
A0A1B0GW41;E9PEN0;Q8WYH8;Q8WYH8-2	0	1	0	0	0	0	0	0	0	0	0
A0A1B0GWB2	0	1	1	0	0	0	0	0	0	0	1
A0A1B0GWD8;Q9C093-4	0	0	1	0	0	0	0	0	0	0	0
A0A1B0GWI2;O75503	0	1	0	0	0	0	0	0	0	0	0
A0A1B0GXA9;C9JHJ7;Q04771	0	0	1	1	0	0	0	0	0	0	0
A0A1B1UZQ1;A0A3B3IRU7;A0A3B3ISJ6;A0A3F2YP58;A0A5F9ZHF9;A0A5F9ZI67;Q9Y233;Q9Y233-2	0	0	1	1	0	0	0	0	0	0	0
A0A1C7CYW7	0	0	1	0	0	0	0	0	1	0	0
A0A1C7CYX0	0	0	0	0	1	0	0	0	0	0	1
A0A1C7CYX8	0	0	0	0	0	0	1	0	0	0	0
A0A1C7CYX9	0	0	0	0	0	0	1	0	0	0	0
A0A1C7CYY4;I3L1K6;I3L532;P12829	0	0	0	0	0	0	0	0	0	0	0
A0A1D5RMN4;P23945;P23945-2;P23945-4	0	1	0	0	0	0	0	0	0	0	1
A0A1P0AYU5;Q9BWM7	0	0	0	0	0	0	0	1	0	0	0
A0A1W2PNF0;A0A1W2PNY6;A0A1W2PPE6;A0A1W2PPG9;A0A1W2PPH4;A0A1W2PQ13;A0A1W2PQ60;A0A1W2PQD6;A0A1W2PQH2;A0A1W2PQL8;A0A1W2PR66;A0A1W2PRN3;A0A1W2PRT7;A0A1W2PS45;A0A1W2PS77;A0A1W2PSA9;A0A1W2PSD1;Q9Y2D2;Q9Y2D2-2;Q9Y2D2-3	0	0	0	0	1	0	0	1	0	0	0
A0A1W2PNH8;A0A1W2PNQ8;A0A1W2PNR0;A0A1W2PNW5;A0A1W2PPB6;A0A1W2PPR7;A0A1W2PQA9;A0A1W2PQP4;A0A1W2PQZ1;A0A1W2PS19;K7ELE1;K7EPJ2;O95427	0	0	0	1	0	0	0	0	0	0	1
A0A1W2PNP0;Q969N2;Q969N2-5	0	0	0	0	1	0	0	0	0	0	1
A0A1W2PNR9;Q9Y5U9	0	0	0	0	0	0	0	0	1	0	1
A0A1W2PNT1	1	0	0	0	0	1	0	0	1	0	0
A0A1W2PNU4;A0A286YES2;F8VYC4;P0DJD0;P0DJD1	0	1	0	0	0	0	0	1	0	0	0
A0A1W2PNV4	0	0	0	0	0	0	1	0	0	0	0
A0A1W2PNW1;A0A494C0T4;H0YJH6;P42226;P42226-3	0	0	0	0	0	0	1	0	0	0	0
A0A1W2PNX8;Q9H3U1;Q9H3U1-2	0	0	0	0	0	0	1	0	0	0	0
A0A1W2PNY5;A0A1W2PPP6;A0A1W2PQA7;A0A1W2PQZ6;A0A1W2PR08;A0A1W2PRF0;A0A1W2PRF5;A0A1W2PRJ0;A0A1W2PS93;A0A1X7SBS0;G5E9D4;Q96EB1;Q96EB1-2;Q96EB1-3	0	0	1	0	0	0	0	0	1	0	0
A0A1W2PNZ9;H7BXU7;Q15652;Q15652-3	0	0	1	1	0	0	0	0	0	0	0
A0A1W2PP04;Q5JY83;Q9Y388	0	1	0	0	0	0	0	0	0	0	1
A0A1W2PP11;Q9H300	0	0	0	1	0	0	0	1	0	0	0
A0A1W2PPB7;E9PH70;H0Y8E4;Q9ULH0;Q9ULH0-2;Q9ULH0-4	0	0	0	0	1	0	0	0	0	0	1
A0A1W2PPC6;Q9H3H5;Q9H3H5-2	0	0	0	0	1	0	0	0	0	0	0
A0A1W2PPD8	0	0	1	0	0	0	0	0	0	0	0
A0A1W2PPH1;P23368	0	0	0	0	0	0	0	1	0	0	0
A0A1W2PPH6	0	1	0	0	0	0	0	1	0	0	0
A0A1W2PPI5;Q5JSJ4	0	0	0	0	0	0	0	0	1	0	1
A0A1W2PPJ5;J3QT51;J3QT87;Q96SW2;Q96SW2-2	1	0	0	0	0	1	0	0	0	0	0
A0A1W2PPS1;Q00839;Q00839-2	0	1	0	0	0	0	0	0	0	0	0
A0A1W2PPT3;P52740;P52740-2	0	0	0	1	0	0	0	1	0	0	0
A0A1W2PPV0;A0A1W2PQG5;Q9Y5P2;Q9Y5P2-2	0	0	1	0	0	0	0	0	1	0	0
A0A1W2PPZ5;P23193	0	0	0	0	0	0	1	0	0	0	0
A0A1W2PQ75;O15488;O15488-2;O15488-3;O15488-4;O15488-6	0	1	0	0	0	0	0	0	0	0	0
A0A1W2PQD2;Q9UBB4	0	0	0	0	0	0	1	0	0	0	0
A0A1W2PQE7	0	0	1	1	0	0	0	0	0	0	1
A0A1W2PQM2	0	0	1	0	0	0	0	0	0	0	0
A0A1W2PQM3	0	0	0	0	1	0	0	0	1	1	0
A0A1W2PQM5;A0A1W2PR19;A0A1W2PRG0	0	0	0	0	0	0	0	0	1	0	0
A0A1W2PQN4	0	0	0	0	0	0	0	0	1	0	1
A0A1W2PQP6;Q9BWL3;Q9BWL3-2;Q9BWL3-3;Q9BWL3-4;Q9BWL3-5;X6R6F3;X6R6S3	0	0	0	0	0	0	0	0	0	0	1
A0A1W2PQQ5	0	0	1	0	0	0	0	1	0	0	1
A0A1W2PQS6	0	0	0	1	1	0	0	1	0	0	0
A0A1W2PR09;A0A1W2PRL5;A0A1W2PRM0;F5GYH1;Q8NC96	0	0	0	0	0	0	0	0	0	0	0
A0A1W2PR17;F2Z2I2;Q16875;Q16875-2;Q16875-3;Q16875-4;Q5VX20;Q5W015	1	0	0	0	0	0	1	0	0	0	0
A0A1W2PR28;A0A1W2PRJ5;A0A6Q8PFR7;Q5JU85;Q5JU85-3	1	0	0	0	0	1	0	0	0	0	0
A0A1W2PR41;Q9Y6Q6;Q9Y6Q6-2;Q9Y6Q6-3;Q9Y6Q6-4;Q9Y6Q6-5	0	0	1	1	0	0	0	0	0	0	1
A0A1W2PR46;A0A1X7SBR3;P14136;P14136-2;P14136-3	0	1	0	0	0	0	0	1	0	0	1
A0A1W2PRB8	0	1	0	0	0	0	0	0	0	0	0
A0A1W2PRI9;E9PNW5	0	0	1	0	1	0	0	0	1	0	0
A0A1W2PRV5;E7EQZ4;Q16637;Q16637-2;Q16637-3;Q16637-4	0	0	0	0	1	0	0	0	1	0	1
A0A1W2PRW4;P53816	0	0	0	0	0	0	0	0	0	0	0
A0A1W2PS05;Q8NEB9	1	0	0	0	0	1	0	0	0	0	0
A0A1W2PS43;Q14108	0	0	0	0	0	0	0	0	0	1	0
A0A1W2PS52	0	0	1	0	0	0	0	0	0	1	0
A0A1W2PS94;A0A2R8Y358;Q9BXT5	1	0	0	0	0	1	0	0	0	0	0
A0A1X7SBT1;Q9H1D0;Q9H1D0-2	0	1	0	0	0	0	0	1	0	0	0
A0A1X7SBT7;O95502	0	0	1	0	0	0	0	0	1	0	0
A0A1X7SBY3;H0Y860;Q9P246;Q9P246-2	0	1	0	0	0	0	0	0	1	0	1
A0A1X7SBZ2;A0A5H1ZRQ2;Q92841	0	1	0	0	1	0	0	0	0	0	0
A0A1Y0BRN3;A0A590UJ40	0	0	0	0	0	0	0	0	0	0	0
A0A286YEV4;A0A286YEV9;A0A286YEW8;A0A286YEX1;A0A286YF00;A0A286YF45;A0A286YF51;A0A286YF73;A0A286YFC6;A0A286YFE7;A0A286YFF5;A0A286YFH9;A0A286YFM2;B7Z2B2;E7ERQ4;Q8NHS3	0	0	0	0	0	1	0	0	1	0	0
A0A286YEX4;P08651;P08651-5;P08651-6	0	1	0	0	0	0	0	0	0	0	0
A0A286YF17;A0A286YFD0;P42898;P42898-2;Q5SNW7	0	0	0	0	0	0	1	0	0	0	0
A0A286YF22;O43175	0	0	0	0	0	0	1	0	0	0	0
A0A286YF37;Q9UK22	0	0	0	0	0	0	1	0	0	0	0
A0A286YF93	0	0	1	0	0	0	0	1	0	0	0
A0A286YFA5;Q8NGQ1	0	0	1	0	0	0	0	0	0	0	1
A0A286YFE3;A0A286YFF7;A0A286YFL8;A0A2C9F2P4;P50897;Q5T0S4	0	0	0	0	0	0	0	0	0	1	0
A0A286YFF8;Q7Z3U7;Q7Z3U7-2;Q7Z3U7-5;Q7Z3U7-6	1	0	0	0	0	0	1	0	0	0	0
A0A2Q2TTZ9;P01593;P01594	0	1	0	0	0	0	0	0	0	0	1
A0A2Q3DQE3;Q13555;Q13555-10;Q13555-11;Q13555-2;Q13555-3;Q13555-4;Q13555-5;Q13555-6;Q13555-7;Q13555-8;Q13555-9;Q5SWX3;Q8WU40	0	1	0	0	0	0	0	0	0	0	0
A0A2R8Y2A8	0	0	0	0	0	0	0	0	0	0	0
A0A2R8Y2F6;P42336	0	0	0	1	0	0	0	1	0	0	0
A0A2R8Y3M9	0	0	0	0	1	0	0	0	0	1	0
A0A2R8Y3N3;A0A2R8Y5P7;A0A2R8Y6I1;P49590;P49590-2	0	0	0	0	0	0	0	1	0	0	0
A0A2R8Y3S0;A0A2R8Y511;A0A2R8YCL0;Q96JX3	0	1	0	0	0	0	0	1	0	0	0
A0A2R8Y440;A0A2R8Y4P4;A0A2R8Y7S2;A0A2R8YG32;A0A2R8YGG3;P51532;P51532-2;P51532-3;P51532-4;P51532-5;Q9HBD4	0	1	0	0	0	0	0	0	0	0	0
A0A2R8Y455;A0A2R8Y600;A0A2R8Y620;A0A2R8Y7U2;Q86VX2;Q86VX2-2	0	0	0	0	0	1	0	0	1	0	0
A0A2R8Y471;Q12967;Q12967-2;Q12967-3;Q12967-4;Q12967-5;Q12967-6;Q5T7U6	0	0	0	0	0	0	0	1	0	0	0
A0A2R8Y478;A6NNI4;G8JLH6;P21926	0	0	0	0	0	0	0	0	1	0	0
A0A2R8Y484;Q08722;Q08722-2;Q08722-3;Q08722-4	0	0	0	0	1	0	0	0	1	0	1
A0A2R8Y491;E7EWD9;O95718;O95718-1;O95718-2	0	1	0	0	0	0	0	0	0	0	0
A0A2R8Y4C2;A0A2R8Y596;A0A2R8Y5C9;A0A2R8Y5E4;A0A2R8Y6M6;A0A2R8Y8C4;A0A2R8YFK2;A0A2R8YFS8;P56945;P56945-2;P56945-3;P56945-4;P56945-5;P56945-6;P56945-7;P56945-8	0	0	0	0	0	0	1	0	0	0	0
A0A2R8Y4F5	0	0	1	0	0	0	0	0	0	0	0
A0A2R8Y4I8;A0A2R8Y7K2;A0A2U3TZR0;Q9UBP0;Q9UBP0-2;Q9UBP0-3;Q9UBP0-4	0	0	0	0	0	0	0	0	0	0	0
A0A2R8Y4K2;Q9Y2S2	0	0	0	0	0	0	1	0	0	0	0
A0A2R8Y4M1;A0A2R8Y615;A0A2R8YGW2;A0A5F9ZHK1;Q9NZA1;Q9NZA1-2;Q9NZA1-3	0	0	1	0	1	0	0	0	0	0	1
A0A2R8Y4T1	0	1	0	1	0	0	0	0	0	0	0
A0A2R8Y4U1;A0A2R8YDF7;O75164	0	1	0	0	0	0	0	0	0	0	0
A0A2R8Y4U4	0	1	0	0	0	0	0	0	1	0	1
A0A2R8Y4V0;A0A2R8Y4Z4;A0A2R8Y5D8;A0A2R8Y6Q0;A0A2R8YDG0;Q09428;Q09428-2	0	0	0	1	0	0	0	0	0	0	1
A0A2R8Y4W0	0	0	0	1	0	0	0	1	0	0	1
A0A2R8Y4W1;A0A2R8Y860;A0A2R8YD46;A0A2R8YFE3;A0A2U3TZS7;P43004;P43004-2	0	0	0	1	1	0	0	0	0	0	1
A0A2R8Y4W2;A0A2R8YE63;Q12929	0	1	0	0	0	0	0	0	0	0	0
A0A2R8Y4Y7;A0A2R8YFW4;Q9UQ90	0	0	0	0	0	0	0	1	0	0	0
A0A2R8Y4Z0;A0A2R8Y7W5;A0A2R8YF61;Q14004;Q14004-2	0	0	0	0	0	0	1	0	0	0	0
A0A2R8Y4Z6;J3KMZ7;Q9H0H0	1	0	0	0	0	0	0	0	0	0	0
A0A2R8Y4Z8	0	1	0	0	0	0	0	0	0	1	0
A0A2R8Y524;A0A2R8YEC9;E9PFW2;O00462	0	1	0	0	0	0	0	0	0	1	0
A0A2R8Y543;A0A2R8Y5A3;A0A2R8Y804;A0A2R8YCH5;B4DGU4;P35222	0	1	0	0	0	0	0	0	0	0	1
A0A2R8Y544;Q9BR61	0	0	0	0	0	0	1	0	0	0	0
A0A2R8Y549;Q8NI35;Q8NI35-2;Q8NI35-3;Q8NI35-4	0	0	0	0	0	0	0	0	0	0	0
A0A2R8Y566;Q9P260-2	0	0	0	0	0	0	1	0	0	0	0
A0A2R8Y595;A0A2R8YFL0;P49711	0	1	0	0	0	0	0	0	0	0	0
A0A2R8Y5A0;A0A2R8YD58;E7EU96;P68400	0	1	0	0	0	0	0	0	0	0	0
A0A2R8Y5D3;A0A2R8YEZ4;O15160;O15160-2	0	1	0	0	0	0	0	0	0	0	0
A0A2R8Y5F1;A0A2R8Y7C8;A0A2R8Y7X5;A0A2R8YDR3;A0A2R8YDZ2;A0A2R8YGD6;A0A2R8YGU4;H3BMQ0;P49815;P49815-2;P49815-3;P49815-4;P49815-5;P49815-6;P49815-7;X5D2U8	0	0	0	0	0	0	0	0	0	0	0
A0A2R8Y5J4;Q9BYG8	0	1	0	0	0	1	0	0	1	0	0
A0A2R8Y5K2;Q96LT7	0	0	0	0	0	0	0	0	0	1	0
A0A2R8Y5N2;A0A2R8Y5S3;A0A2R8YFV7;Q92574;Q92574-2	0	1	0	0	0	0	0	0	0	0	0
A0A2R8Y5P9;Q8TF72	0	1	1	0	0	0	0	0	0	0	0
A0A2R8Y5Q8;A0A2R8YHI9;Q15813;Q15813-2	0	0	0	0	0	0	0	0	0	0	0
A0A2R8Y5Y7;D6RAN4;P32969	0	0	0	0	1	0	0	1	0	0	0
A0A2R8Y605	0	0	0	0	0	0	0	0	1	0	0
A0A2R8Y635;A0A2R8YDN7;Q9H7F0;Q9H7F0-2	0	1	1	0	0	0	0	0	1	0	0
A0A2R8Y640	0	1	0	0	0	0	0	0	0	0	0
A0A2R8Y648	0	0	0	0	0	0	1	0	0	0	0
A0A2R8Y651;Q8TF64	1	0	0	0	0	0	0	0	0	0	0
A0A2R8Y653;Q9BZX2	0	0	0	0	0	0	1	0	0	0	0
A0A2R8Y661;A0A2R8YGD3;Q9Y4G8	0	0	0	0	0	0	0	0	0	0	0
A0A2R8Y6D0	0	0	0	1	0	0	0	0	0	0	1
A0A2R8Y6I6;A0A2R8Y6L5;A0A2R8YDF3;Q13627;Q13627-2;Q13627-3;Q13627-4;Q13627-5	1	0	0	0	0	0	0	0	0	0	0
A0A2R8Y6P2;A0A2R8YDC4;A6NFE3;C9J654;J3KR48;J3KR52	1	0	0	0	0	0	0	0	1	0	0
A0A2R8Y6W8;P19447	0	1	0	0	0	0	0	0	0	0	1
A0A2R8Y6Y7;A0A2R8YDQ9;Q9P2R7;Q9P2R7-2	0	0	0	0	0	0	0	1	0	0	0
A0A2R8Y783	0	0	1	0	0	0	0	0	0	0	1
A0A2R8Y7B4	1	0	0	0	0	0	0	0	1	0	0
A0A2R8Y7D5	0	1	1	0	0	0	0	1	0	0	0
A0A2R8Y7E6;A0A5F9ZHX3;A0A5F9ZI57	0	0	0	0	1	0	0	0	0	0	1
A0A2R8Y7I9;A0A2R8Y855;A0A2U3TZQ7;B4DGM3;J3QKS7;Q969G3;Q969G3-2;Q969G3-4;Q969G3-5	0	1	0	0	0	0	0	0	0	0	0
A0A2R8Y7J6;A0A2R8YD89;A0A2R8YEZ2;H3BNF9;H3BS01;Q9Y2V0;Q9Y2V0-2	0	0	0	0	0	1	0	0	1	1	0
A0A2R8Y7P6;A0A5F9ZHW5;F8VQP2;Q99700;Q99700-4;V9GY86	0	0	0	1	0	0	0	0	0	0	0
A0A2R8Y7Q1;E7ETD6;E9PE19;F5GXF5;Q12830;Q12830-2;Q12830-4	0	1	0	0	0	0	0	0	0	0	0
A0A2R8Y7Q6;Q04864;Q04864-2	1	0	0	0	0	0	0	0	0	0	0
A0A2R8Y7R4;B2RUZ4;H3BS66	0	1	0	0	0	0	0	0	0	1	0
A0A2R8Y7T6;A0A3B3IRZ4;Q6DN90;Q6DN90-3	0	0	0	0	0	0	1	0	0	0	0
A0A2R8Y7U0;H0Y770;O75140;O75140-1;O75140-4;O75140-9	0	0	0	0	0	0	0	0	0	0	0
A0A2R8Y7V5;H0Y850;P38398;P38398-4;P38398-7;P38398-8;Q5YLB2	0	0	1	0	0	0	0	0	0	0	1
A0A2R8Y7X9;P69891;P69892	0	0	1	0	0	0	0	0	1	0	1
A0A2R8Y7Y4;Q8N8A2;Q8N8A2-2;Q8N8A2-4	1	0	0	0	0	0	1	0	0	0	0
A0A2R8Y811;P62263	0	0	0	1	1	0	0	0	0	0	0
A0A2R8Y840;Q9HCK8;Q9HCK8-2	0	1	0	0	0	0	0	0	0	0	0
A0A2R8Y849;A0A2R8Y8A0;A0A2R8YD14;E7ETK0;P62847;P62847-2;P62847-3;P62847-4	0	0	0	1	1	0	0	1	0	0	0
A0A2R8Y851;P62273;P62273-2	0	0	0	0	1	0	0	1	0	0	0
A0A2R8Y852;A0A2R8YDI1;P39880;P39880-2;P39880-3;P39880-4;P39880-5;P39880-6	0	0	0	0	0	0	0	0	1	0	0
A0A2R8Y880;Q7Z6E9;Q7Z6E9-2	0	1	0	0	0	0	0	0	1	0	1
A0A2R8Y8E0;A0A2U3TZI2;H7C560;P15056	0	0	0	0	0	0	1	0	0	0	0
A0A2R8YCJ8;Q5T2H3;Q9NVV5;Q9NVV5-1;Q9NVV5-3	0	0	0	0	1	0	0	0	0	0	0
A0A2R8YCL1;Q13322;Q13322-3;Q13322-4	0	0	0	0	0	0	0	0	0	0	0
A0A2R8YCS7;Q9Y3Z3	1	0	0	0	0	0	0	0	0	0	0
A0A2R8YD30;P11171;P11171-2;P11171-3;P11171-4;Q4VB86	0	0	0	1	0	0	0	0	0	0	0
A0A2R8YD63;Q92547	0	0	0	0	0	0	0	0	0	0	0
A0A2R8YD85;Q96BY6;Q96BY6-3	0	0	0	0	0	0	0	0	1	0	0
A0A2R8YDB8;H7BXF5;Q9H0E3;Q9H0E3-3	0	1	0	0	0	0	0	0	0	0	0
A0A2R8YDC7;A0A2R8YE40;A0A2R8YF99;A0A2R8YFQ8;A0A2R8YGK2;F8W7S1;Q8NAN2;Q8NAN2-2	0	0	1	0	0	0	0	0	1	0	0
A0A2R8YDD5;P30531	0	0	0	0	1	0	0	0	0	0	1
A0A2R8YDI5;O94823;O94823-2;O94823-3	0	0	1	0	0	0	0	1	0	0	0
A0A2R8YDL0;O75443	0	0	0	0	0	0	0	0	0	0	0
A0A2R8YDQ0;Q9H267	0	0	0	0	0	0	0	0	0	0	0
A0A2R8YDR8;Q9BZD2;Q9BZD2-2	0	1	0	0	0	1	0	0	1	0	0
A0A2R8YDT1;P15104	1	0	0	0	0	0	1	0	0	0	0
A0A2R8YE10;Q9NRW7	0	0	0	0	0	1	0	0	1	1	0
A0A2R8YE69;P0CG41;Q8IX94	0	1	1	0	0	0	0	0	0	0	0
A0A2R8YE77;A0A2U3TZM1;O14936;O14936-3	0	0	0	1	1	0	0	0	0	0	1
A0A2R8YEA1;B5MCJ9;O15016;O15016-2	0	0	0	0	0	0	0	1	0	0	0
A0A2R8YEH1	0	0	1	0	0	0	0	0	0	0	0
A0A2R8YEI5;P52757;P52757-9	1	0	0	0	0	0	1	0	0	0	0
A0A2R8YEL6	0	0	0	0	0	0	0	0	0	0	0
A0A2R8YEM2;D6RG18;D6RHI7;P51946	0	0	0	0	0	0	0	0	1	0	1
A0A2R8YEM9;O15050	0	0	1	0	0	0	0	0	0	0	0
A0A2R8YEZ0;B7WP89;Q0P651;Q0P651-2;Q0P651-3;Q0P651-4	0	0	0	0	0	0	0	1	0	0	0
A0A2R8YF49	0	0	0	0	0	0	0	0	0	0	0
A0A2R8YF72;A0A3B3IRF0;A0A3B3IRT9;A0A3B3IRX5;A0A3B3ISI4;A0A3B3ISW5;A0A3B3ITJ8;A0A3B3ITL3;A0A3B3ITS6;A0A3B3IUE2;H7BYU4;Q9UL68;Q9UL68-4	0	0	0	0	0	0	0	1	0	0	0
A0A2R8YFF1;Q8N302	0	0	0	0	0	1	0	0	1	0	0
A0A2R8YFG2;Q96T66	0	0	0	0	0	0	0	1	0	0	0
A0A2R8YFH5;Q15437	1	0	0	0	0	1	0	0	0	0	0
A0A2R8YFL3	1	0	0	0	0	1	0	0	1	0	0
A0A2R8YFN3;A1Z1Q3;A1Z1Q3-1	0	0	1	0	0	0	1	0	0	0	0
A0A2R8YFN7	0	0	0	0	0	0	0	0	1	1	0
A0A2R8YFW3;O60907;O60907-2	0	1	0	0	0	0	0	0	0	0	0
A0A2R8YFX0;Q969X2;Q969X2-2	0	0	0	0	0	0	0	0	1	0	0
A0A2R8YG42;B1ALK7;Q14155-1;Q14155-5	1	0	0	0	0	1	0	0	0	0	0
A0A2R8YGH5;H7C1E4;P61966	0	0	0	0	0	0	0	0	1	1	0
A0A2R8YGW0;P51795;P51795-1	0	0	0	0	0	1	0	0	1	0	0
A0A2R8YHG5;Q9BZV2	0	0	0	0	0	0	0	0	1	0	1
A0A2U3TZH3;Q05639	0	1	0	0	0	0	0	0	1	0	0
A0A2U3TZK7	0	0	0	0	0	0	0	1	0	0	0
A0A2U3TZL5;E9PNW4;P13987;P13987-2	0	0	0	0	1	0	0	0	0	1	1
A0A2U3TZN6	0	0	1	0	0	0	0	0	0	0	1
A0A2U3TZT9	0	0	1	0	0	0	0	0	0	0	0
A0A2U3TZU2;P06744	0	0	0	0	0	0	1	0	0	0	0
A0A2U3TZV8;Q4KWH8;Q4KWH8-2;Q4KWH8-3;Q4KWH8-4	0	0	0	0	1	0	0	0	0	0	0
A0A2Y9D025;P56556;R4GN43	0	0	0	0	0	0	0	1	0	0	0
A0A384DVU0;Q8IY17;Q8IY17-2;Q8IY17-3	0	0	1	0	1	0	0	0	0	0	0
A0A3B3IQ51;P36980;P36980-2;V9GYE7	0	0	0	0	0	0	0	0	1	0	0
A0A3B3IRE4;Q8TCE6;Q8TCE6-2	0	0	0	0	0	1	0	0	1	0	0
A0A3B3IRI9;A0A3B3IRJ3;A0A3B3IRV1;A0A3B3IRZ0;A0A3B3IS37;A0A3B3IS68;A0A3B3ISJ4;A0A3B3IT04;A0A3B3IT30;A0A3B3ITZ3;A0A3B3IU52;A6NFW1;A6NGJ7;Q9BY41;Q9BY41-4	1	0	0	1	0	0	0	0	0	0	0
A0A3B3IRJ9;Q9Y2H2	1	0	0	0	0	1	0	0	0	0	0
A0A3B3IRK5;Q9H2D1	0	1	0	0	0	0	0	1	1	0	0
A0A3B3IRL2;O75629	0	0	0	0	0	0	0	0	0	1	0
A0A3B3IRL5;C9J381;P20839;P20839-2;P20839-3;P20839-4;P20839-5;P20839-6;P20839-7	1	0	0	0	0	1	0	0	0	0	0
A0A3B3IRN8;A0A3B3ITX0;P24311	0	0	0	0	0	0	0	1	0	0	0
A0A3B3IRP9	0	0	0	0	0	0	0	0	1	0	0
A0A3B3IRQ5	0	0	1	0	0	0	0	0	0	0	0
A0A3B3IRQ7	0	0	0	0	0	0	0	1	0	0	0
A0A3B3IRR1;A0A3F2YNY7;P08397;P08397-2	0	0	0	0	0	0	1	0	0	0	0
A0A3B3IRS4;A0A3B3IRX3;A0A3B3IS46;H0YHC1;Q71F56	0	0	1	0	0	1	0	0	1	0	0
A0A3B3IRT8;C9IZQ1;C9J3L8;C9J5W0;E9PAL7;P43307	0	0	0	0	0	0	0	1	0	0	0
A0A3B3IRU6;A0A3B3ISL2;Q9GZU2;Q9GZU2-2;Q9GZU2-4	0	1	0	0	0	0	0	0	1	0	0
A0A3B3IRY8	0	0	0	1	0	0	0	1	0	0	1
A0A3B3IRZ5;Q8IYE1	0	1	0	0	0	0	0	1	0	0	0
A0A3B3IS06;E7ETY2;Q13428-3;Q13428-7;Q13428-8	0	1	0	0	0	0	0	0	0	0	0
A0A3B3IS13	0	0	0	0	0	0	0	0	0	0	0
A0A3B3IS24;C9JIR6;O75688;O75688-2;O75688-4	0	1	0	0	0	0	1	0	0	0	0
A0A3B3IS40;A0A3B3ISE6;A0A3B3IT25;A0A3B3ITA8;A0A3B3ITA9;A0A3B3ITE7;A0A3B3ITJ7;B3KV94;Q9UGL1;Q9UGL1-2	0	1	0	0	0	0	0	0	0	0	0
A0A3B3IS62;A0A3B3ITD6;A0A3B3ITI5;Q9Y672;S4R350	0	0	0	0	1	0	0	1	0	0	0
A0A3B3IS66	0	0	0	1	0	0	0	0	1	0	0
A0A3B3IS71;P06400	0	1	0	0	0	0	0	0	0	0	0
A0A3B3IS75;K7EIP0;K7EJD9;K7ESF2;P13686	0	0	0	0	1	0	0	0	0	0	0
A0A3B3ISA5	0	0	1	0	0	0	0	0	1	0	0
A0A3B3ISF0;Q659C4;Q659C4-2	0	0	0	0	1	0	0	0	0	0	0
A0A3B3ISF9;P42892;P42892-2;P42892-3;P42892-4	0	0	0	0	0	0	0	0	0	1	0
A0A3B3ISG5;P14735	0	0	0	0	0	0	1	0	0	0	0
A0A3B3ISG8	0	0	0	0	0	0	0	1	0	0	0
A0A3B3ISH6;Q86U38;Q86U38-2	0	1	0	0	0	0	0	0	0	0	0
A0A3B3ISJ2;Q96KQ4	0	0	0	1	0	0	0	0	0	0	0
A0A3B3ISK7;Q6PI48	0	0	0	0	0	0	0	1	0	0	0
A0A3B3ISP1;A0A3B3ITU5;Q92625;Q92625-2	0	0	0	0	0	0	0	0	0	0	0
A0A3B3ISQ4;Q9H6S3	0	0	0	0	0	0	1	0	0	0	0
A0A3B3ISR2;B4DPQ0;P00736	0	0	0	0	0	0	0	0	0	0	0
A0A3B3ISR7;E9PIF2;Q13206	0	1	0	0	0	0	0	0	0	0	0
A0A3B3ISS6	0	0	0	0	0	0	0	0	0	0	1
A0A3B3IST1;B5MD23;O75954	0	0	0	0	1	0	0	0	0	0	1
[truncated: 7,498 more rows]

## Sheet: E05_B_lower
localization combinations HFHF fasted
[truncated: 8,312 more rows]

## Sheet: E05_C
Multilocalization HFHF fed			Multilocalization HFHF fasted
[truncated: 5 more rows]
