# Supplementary material for: C-COMPASS: a user-friendly neural network tool profiles cell compartments at protein and lipid levels
Source: Nat Methods. 2025 Dec 4;23(1):118–30. doi: 10.1038/s41592-025-02880-3 (PMC12791020; doi:10.1038/s41592-025-02880-3)
Supplement: Supplementary file 27 — Humanized liver spatial proteomic relocalization. [file 41592_2025_2880_MOESM27_ESM.xlsx]

## Sheet: E06_A
PROTEIN	in_chow_fed	in_chow_fasted
A0A024QZ33;K7EK40;K7EMD8;K7ERM9;Q9H0G5	TRUE	TRUE
A0A024QZX5;A0A087X1N8;A0A2R8YD12;P35237	TRUE	TRUE
A0A024R3B9;E9PJL7;E9PNH7;E9PRA8;P02511	TRUE	TRUE
A0A024R7W5;A0A087WY31;A0A087X0Q1;Q7Z739	TRUE	TRUE
A0A024RAC6;Q14241	TRUE	TRUE
A0A024RCN4;A0A087X2F1;B4DMT1;Q16670;Q16670-2	FALSE	TRUE
A0A024RCQ8;A0A0G2JH76;A0A0G2JHB6;A0A0G2JIU6;A0A0G2JK02;A0A0G2JKR3;A0A0G2JLA3;A0A0G2JLL3;A0A140T8X7;A0A140T9Y1;G8JLL2;Q9UMR5;Q9UMR5-2;Q9UMR5-3	TRUE	TRUE
A0A044PY82	FALSE	TRUE
A0A075B6F0;H7BXG6;M0R167;Q9H0D2;Q9H0D2-2	TRUE	FALSE
A0A075B6F9;Q9Y314	TRUE	TRUE
A0A075B6U9	FALSE	TRUE
A0A075B6W5	TRUE	FALSE
A0A075B727;A0A075B728;P16284;P16284-2;P16284-3;P16284-4;P16284-5;P16284-6	FALSE	TRUE
A0A075B730;P58107	FALSE	TRUE
A0A075B754;Q96QE3;Q96QE3-2	TRUE	TRUE
A0A075B773;K7ELY8;O00623	TRUE	FALSE
A0A075B7B1;C9JIE4;O15061;O15061-2;O15061-3	TRUE	TRUE
A0A075B7F1;S4R3C0	TRUE	TRUE
A0A087WSW7;A0A0B4J1V9;F6XU50;Q9NRZ9;Q9NRZ9-2;Q9NRZ9-3;Q9NRZ9-4;Q9NRZ9-5;Q9NRZ9-6	TRUE	TRUE
A0A087WSY1;O15146;O15146-2;O15146-3;Q5T0B5	FALSE	TRUE
A0A087WSY5;Q96IY4	TRUE	FALSE
A0A087WSZ7;A0A1B0GW84;D6RHE0;Q08493;Q08493-2;Q08493-3;Q08499;Q08499-10;Q08499-11;Q08499-2;Q08499-3;Q08499-4;Q08499-5;Q08499-6;Q08499-8;Q08499-9;Q32MM7	TRUE	FALSE
A0A087WT18;Q96A73;Q96A73-2	TRUE	TRUE
A0A087WT23;A0A087WV67;O00124;O00124-3	TRUE	TRUE
A0A087WT34	TRUE	FALSE
A0A087WT84;Q9H9V9;Q9H9V9-2	FALSE	TRUE
A0A087WT87;P43003;P43003-2	TRUE	TRUE
A0A087WT95;P49753	FALSE	TRUE
A0A087WTJ6;O14627;P47902;P47902-2;Q99626	FALSE	TRUE
A0A087WTM1;Q9Y6N7;Q9Y6N7-2;Q9Y6N7-3;Q9Y6N7-4;Q9Y6N7-5;Q9Y6N7-6	TRUE	TRUE
A0A087WTQ2;A0A3B3IT47;C9JGR9;E7EQ49;Q9Y2I8;Q9Y2I8-2;Q9Y2I8-3	TRUE	FALSE
A0A087WTV6;A0A087WZR9;Q96C36	TRUE	FALSE
A0A087WTY4;P49454	TRUE	FALSE
A0A087WU02;Q96RQ1	TRUE	TRUE
A0A087WU05;A0A087WY48;Q8IY22;Q8IY22-2;Q8IY22-3	TRUE	TRUE
A0A087WUE2	TRUE	TRUE
A0A087WUE6;A4PB68;Q3T8J9;Q3T8J9-2;Q3T8J9-3;Q9H869;Q9H869-2;Q9H869-3;Q9H869-4;Q9H869-5;Q9H869-6;Q9H869-7;Q9H869-8;Q9H869-9	TRUE	TRUE
A0A087WUJ1;Q9H400;Q9H400-2	TRUE	FALSE
A0A087WUJ4;Q92618	TRUE	FALSE
A0A087WUL4;A0A087WX23;A0A087WZG9;B4DSP0	TRUE	FALSE
A0A087WUQ6;P07203	TRUE	TRUE
A0A087WUU8;M0R3J2	TRUE	TRUE
A0A087WUV9	TRUE	FALSE
A0A087WUW9;Q9NXU5	TRUE	TRUE
A0A087WV25;O95684;O95684-2	TRUE	TRUE
A0A087WV39;Q92698;V9GYD3	TRUE	TRUE
A0A087WV96	TRUE	FALSE
A0A087WVE2;O00602	TRUE	FALSE
A0A087WVF1;K7EQH1;Q96B23;Q96B23-2	TRUE	TRUE
A0A087WVF7;Q9NZM3;Q9NZM3-2	FALSE	TRUE
A0A087WVI0;E9PBL8;Q8WTW3	TRUE	TRUE
A0A087WVT6;A0A087X159;D6RAC5;P81877;P81877-2;P81877-3;P81877-4;P81877-5;Q9BWW4;Q9BWW4-2;Q9BWW4-3	FALSE	TRUE
A0A087WVT8;A0A087X1L3;Q6ZWJ8	TRUE	FALSE
A0A087WVX5;A0A1B0GTA9;A0A1B0GTF6;A0A1B0GTN8;A0A1B0GTP5;A0A1B0GTS4;A0A1B0GTX2;A0A1B0GU53;A0A1B0GUI8;A0A1B0GUK4;A0A1B0GVB2;A0A1B0GWF9;A0A1C7CYX2;A0A2R8Y555;A0A2U3TZM7;A0A494C0B2;A0A494C0Z9;A0A494C184;E7EN11;F8VNV8;F8VU10;F8VUW8;H0Y476;O00305;O00305-2;O00305-3;O00305-4;P54284;P54284-2;P54284-3;P54284-4;P54284-5;Q02641;Q02641-2;Q02641-3;Q08289;Q08289-10;Q08289-2;Q08289-3;Q08289-4;Q08289-5;Q08289-6;Q0…	TRUE	TRUE
A0A087WVZ7;A0A087X068;Q9UJW7;Q9UJW7-2	TRUE	TRUE
A0A087WVZ9;A0A0A0MQR7;P19388	TRUE	TRUE
A0A087WW06;B0QYP5;Q96AY4	TRUE	TRUE
A0A087WW48;E7ET14;H0Y3N9;H0Y589;O75151;Q9UPP1;Q9UPP1-2;Q9UPP1-3;Q9UPP1-4;Q9UPP1-5	TRUE	TRUE
A0A087WW58;Q9C0D9	TRUE	TRUE
A0A087WW76;A0A1B0GTZ9;A0A1B0GV73;A0A452Q6Z5;H0Y468;Q5T5U3	TRUE	TRUE
A0A087WW77;Q15334	TRUE	FALSE
A0A087WWP8;A0A0C4DGT8;A0A0C4DH79;Q5VWQ0;Q5VWQ0-4	TRUE	FALSE
A0A087WWR2;H3BQI4;H3BQS2;I3L2Z5;P56270;P56270-2;P56270-3;P56270-4	TRUE	TRUE
A0A087WWT7;A0A1W2PRP3;Q7Z7M1	TRUE	FALSE
A0A087WWU8	TRUE	TRUE
A0A087WWY0;P08519	TRUE	TRUE
A0A087WX02;F8WB74;M0QYX1;P63302	TRUE	FALSE
A0A087WX10;G3V4M2;G3V5E8;P54803	TRUE	TRUE
A0A087WX11;J3KNG8;Q8TF40;Q8TF40-3	TRUE	FALSE
A0A087WX80;A0A087WYF1;P24043	FALSE	TRUE
A0A087WX97;Q9BXK5	TRUE	FALSE
A0A087WX99;A0A0G2JRA4;P55283;P55283-2	TRUE	TRUE
A0A087WXD1;Q96T83	FALSE	TRUE
A0A087WXI2;Q9Y6R7	TRUE	TRUE
A0A087WXI5;P12830;P12830-2	FALSE	TRUE
A0A087WXK4;Q7Z3F1	TRUE	FALSE
A0A087WXS6;C9JBF1	TRUE	FALSE
A0A087WXW3;Q9Y3P8	TRUE	TRUE
A0A087WXW6;A0A140TA70;A0A140TA74;A9JR48;Q9BXA9;Q9BXA9-2;Q9BXA9-3;Q9BXA9-4	TRUE	TRUE
A0A087WY00;F8W6H6;F8WE88;G3V394;Q9Y4I1;Q9Y4I1-2;Q9Y4I1-3	FALSE	TRUE
A0A087WY71;Q96CW1;Q96CW1-2	TRUE	FALSE
A0A087WY85;A0A0A0MQU3;D6RAH7;D6RFM0;H9KV45;P61077;P61077-2;P61077-3;P62837;P62837-2	TRUE	TRUE
A0A087WYL3;Q17R60	FALSE	TRUE
A0A087WYN9;Q7Z478	TRUE	TRUE
A0A087WYP2;Q8IZQ5	FALSE	TRUE
A0A087WYT3;Q15185;Q15185-4	TRUE	TRUE
A0A087WYX8;A0A1W2PQW0;A0A590UJL7;A0A5F9ZH12;A0A5F9ZHT2;A0A6Q8PH73;Q14CM0	TRUE	TRUE
A0A087WZ50;Q8TCT7;Q8TCT7-2;Q8TCT7-4	TRUE	FALSE
A0A087WZ62;Q9H6U8;Q9H6U8-3	TRUE	TRUE
A0A087WZC2;A0A0C4DGS8;E0YMJ8;P35680;P35680-2;P35680-3;P35680-4	TRUE	TRUE
A0A087WZM2;D6REQ6;D6RHI9;O00584	FALSE	TRUE
A0A087WZM8;Q8TBM7;Q8TBM7-2;Q8TBM7-3	TRUE	TRUE
A0A087WZP9	FALSE	TRUE
A0A087WZQ7;Q9H115	TRUE	FALSE
A0A087WZT2;Q6UX53	TRUE	FALSE
A0A087WZT3;Q9H3K6	TRUE	TRUE
A0A087WZY5;A8MXH5;F5H3Q5;F5H851;Q14031;Q14031-2	TRUE	FALSE
A0A087X080;A0A0U1RRH1;A0A0X1KG73;Q15413;Q15413-2;Q15413-3	FALSE	TRUE
A0A087X091	FALSE	TRUE
A0A087X0D5;P09668	TRUE	TRUE
A0A087X0H8;Q15714;Q15714-2;Q15714-3	TRUE	TRUE
A0A087X0K0;P39059	FALSE	TRUE
A0A087X0K9	TRUE	FALSE
A0A087X0M4;Q9BWU0	TRUE	TRUE
A0A087X0P0	TRUE	TRUE
A0A087X0R9;B8ZZK1;Q07837;Q07837-2;Q07837-5;Q07837-6;Q07837-7	TRUE	TRUE
A0A087X0Y2;A0A087X248;A0A087X2I9;A0A096LPD8;F5GWV3;F5H3N7;F5H8B4;O14607;O14607-2;O14607-3;O14607-4;O14607-5	TRUE	TRUE
A0A087X117;A0A0G2JN29;Q15155	TRUE	TRUE
A0A087X138;Q8TF71	TRUE	FALSE
A0A087X1B6;E9PEG3;F5GZG9;P10275;P10275-3;P10275-4	TRUE	TRUE
A0A087X1E4;P53365;P53365-3	TRUE	TRUE
A0A087X1G4	TRUE	TRUE
A0A087X1J7;P22352	TRUE	TRUE
A0A087X1K1;Q96C00	TRUE	TRUE
A0A087X1P3;C9IYE1;F8W8P5;H7BYR4;Q86UW7;Q86UW7-2;Q86UW7-3	TRUE	FALSE
A0A087X1P5;J3KQ41;J3QT95;Q9H9Q2;Q9H9Q2-3	TRUE	TRUE
A0A087X1R3;A0A0C4DGX0;A6QL64;Q8N2N9	TRUE	FALSE
A0A087X1S3	TRUE	FALSE
A0A087X1W8;A0A0A0MTJ8;Q9BY67;Q9BY67-3;Q9BY67-4;Q9BY67-5;X5DQS5	TRUE	TRUE
A0A087X1Z1;A0A0G2JPW5;A0A0G2JQX1;A0A0G2JSA7;Q96RT8;Q96RT8-2	TRUE	TRUE
A0A087X266;Q9BXJ8	TRUE	TRUE
A0A087X295;E9PDU5;Q9NNW5	TRUE	TRUE
A0A087X2A7;H0YBA5;H7BY63;Q8NB25;Q8NB25-2;Q8NB25-3;Q8NB25-4	TRUE	TRUE
A0A087X2D8;O60271-2;O60271-4	TRUE	FALSE
A0A087X2G6;A0A0C4DGU5;D6RIC3;Q9Y3C1;Q9Y3C1-2;Q9Y3C1-3	FALSE	TRUE
A0A088AWN8;E7EP87;E9PH27;J3KS48;J3KT43;J3QRB0;Q9UHQ1;Q9UHQ1-2;Q9UHQ1-3;Q9UHQ1-4	TRUE	TRUE
A0A090HNM7;A0A1W2PS85;P28715;R4GMW8	FALSE	TRUE
A0A096LNV3;A0A096LP02;Q9Y508;Q9Y508-2	TRUE	FALSE
A0A096LP22;A0A096LP34;C9J7Z1;Q86Y79	TRUE	TRUE
A0A096LP69	FALSE	TRUE
A0A096LPE2	TRUE	TRUE
A0A0A0MQR4;I3L2J0;Q96RK0	TRUE	FALSE
A0A0A0MQS1;Q53H96;Q53H96-2	TRUE	TRUE
A0A0A0MQS9;A0A0A0MTC7;Q16363;Q16363-2	FALSE	TRUE
A0A0A0MQV6;P09038;P09038-1;P09038-2;P09038-3	FALSE	TRUE
A0A0A0MQX1;D6RGD1;Q9HD67	TRUE	TRUE
A0A0A0MR05;H3BM50;H3BN58;H3BPT1;H3BPU5;Q9BVC4;Q9BVC4-4;Q9BVC4-5	TRUE	TRUE
A0A0A0MR07;F5H5P4;P15498;P15498-2;Q96D37	TRUE	TRUE
A0A0A0MR09;P43378	TRUE	TRUE
A0A0A0MR11;A0A0A0MRS1;Q06730;Q06730-2;Q06730-3	TRUE	TRUE
A0A0A0MR25;A0A5S6RJB7;D2CGD1;E7EVR7;H7BXU9;H7C265;P21802;P21802-15;P21802-16;P21802-17;P21802-18;P21802-2;P21802-20;P21802-21;P21802-22;P21802-23;P21802-3;P21802-4;P21802-5;P21802-6;P21802-8;S4R381	TRUE	TRUE
A0A0A0MR67;A0A0A0MSA1;E9PDI6;F5GY28;F5H522;Q13936;Q13936-10;Q13936-11;Q13936-12;Q13936-13;Q13936-14;Q13936-15;Q13936-16;Q13936-17;Q13936-18;Q13936-19;Q13936-2;Q13936-20;Q13936-21;Q13936-22;Q13936-23;Q13936-24;Q13936-25;Q13936-26;Q13936-27;Q13936-28;Q13936-29;Q13936-3;Q13936-30;Q13936-31;Q13936-32;Q13936-33;Q13936-34;Q13936-35;Q13936-36;Q13936-37;Q13936-4;Q13936-5;Q13936-6;Q13936-7;Q13936-8;Q13936…	TRUE	TRUE
A0A0A0MR74;O75907	TRUE	FALSE
A0A0A0MRB5;Q8WXG6;Q8WXG6-2;Q8WXG6-3;Q8WXG6-4;Q8WXG6-5;Q8WXG6-6;Q8WXG6-7;Q8WXG6-8	FALSE	TRUE
A0A0A0MRD0;A0A2R8YCE3;F5H4B4;F5H4B4-2	FALSE	TRUE
A0A0A0MRG8;Q16611	TRUE	FALSE
A0A0A0MRH3;Q9Y2W7;Q9Y2W7-2;Q9Y2W7-3	TRUE	TRUE
A0A0A0MRI1;Q8IXQ4	FALSE	TRUE
A0A0A0MRJ0;Q5VT25;Q5VT25-2;Q5VT25-3;Q5VT25-4;Q5VT25-5;Q5VT25-6	TRUE	TRUE
A0A0A0MRM2;Q86VF7;Q86VF7-2;Q86VF7-3;Q86VF7-4	TRUE	TRUE
A0A0A0MRT2;Q9BTA9;Q9BTA9-2;Q9BTA9-5	TRUE	TRUE
A0A0A0MRZ1;Q9H9P5-1;Q9H9P5-3	TRUE	TRUE
A0A0A0MS14	TRUE	FALSE
A0A0A0MS79;O14513	TRUE	TRUE
A0A0A0MS99;I3L4X2;P33527;P33527-2;P33527-3;P33527-5;P33527-9	FALSE	TRUE
A0A0A0MSA9;A0A0C4DG49;P15151;P15151-2;P15151-3;P15151-4	TRUE	TRUE
A0A0A0MSB4;Q6ZN50;Q969R2;Q969R2-2;Q969R2-3;Q969R2-6	TRUE	TRUE
A0A0A0MSE3;D3DNG8;P30556	TRUE	TRUE
A0A0A0MSG0;A6NGB9	TRUE	TRUE
A0A0A0MSH9;A0A494C1F7;A0A494C1P7;Q86WJ1;Q86WJ1-2;Q86WJ1-4	FALSE	TRUE
A0A0A0MSI6;B7Z1P2;Q9H4M3;Q9H4M3-2	TRUE	TRUE
A0A0A0MSJ9;Q15283;Q15283-2	TRUE	TRUE
A0A0A0MSK3;A0A0C4DH47;A0A498U6I9;C9JS68;P24557;P24557-2;P24557-3;P24557-4;Q53F23	FALSE	TRUE
A0A0A0MSL1;Q8TDM6;Q8TDM6-2;Q8TDM6-3;Q8TDM6-4	FALSE	TRUE
A0A0A0MSM0	FALSE	TRUE
A0A0A0MSP4;Q86WC4	TRUE	TRUE
A0A0A0MSS0;P60880	FALSE	TRUE
A0A0A0MST8;C9JRP1;E9PFN4;Q9Y6M7;Q9Y6M7-12;Q9Y6M7-13;Q9Y6M7-2;Q9Y6M7-6;Q9Y6M7-7;Q9Y6M7-8;Q9Y6M7-9	FALSE	TRUE
A0A0A0MSU4;O94911-3	TRUE	TRUE
A0A0A0MSW2;E9PEI2;Q9BQW3;Q9BQW3-1	TRUE	FALSE
A0A0A0MT02;A2ABK4;P18615;P18615-3	TRUE	TRUE
A0A0A0MT16;Q86UQ4;Q86UQ4-3;Q86UQ4-4	TRUE	TRUE
A0A0A0MT72;C9JUH3;Q9BSQ5;Q9BSQ5-2;Q9BSQ5-3	TRUE	FALSE
A0A0A0MT93	FALSE	TRUE
A0A0A0MTG5;P13232;P13232-2;Q5FBX5	TRUE	TRUE
A0A0A0MTH9;O14981	FALSE	TRUE
A0A0A0MTL6;Q6ZS17;Q6ZS17-2;Q6ZS17-3;Q6ZS17-4	TRUE	TRUE
A0A0A0MTN3	TRUE	TRUE
A0A0A0MTP7;F8VXG7;Q99590;Q99590-2	TRUE	TRUE
A0A0A0MTQ3;Q96N23;Q96N23-2	TRUE	TRUE
A0A0A0MTQ8;P0C221	TRUE	TRUE
A0A0A0MTS9;K7EKZ0;K7EP24;K7ER94;Q2V2M9;Q2V2M9-2;Q2V2M9-3;Q2V2M9-4	TRUE	TRUE
A0A0A6YYA0;Q86XR7-2;Q9Y3B3;Q9Y3B3-2	TRUE	FALSE
A0A0A6YYC7;Q96JP5;Q96JP5-2	TRUE	TRUE
A0A0A6YYL4;P57737-3	TRUE	TRUE
A0A0B4J1S8;Q9UBF8;Q9UBF8-2;Q9UBF8-3	TRUE	TRUE
A0A0B4J1Y2;Q8NDW8;Q8NDW8-3;Q8NDW8-5;Q8NDW8-6;Q8NDW8-7	TRUE	TRUE
A0A0B4J269	TRUE	FALSE
A0A0B4J291;Q8N8U2	TRUE	TRUE
A0A0B4J294;H3BP13;Q9UL33;Q9UL33-2	TRUE	FALSE
A0A0B4J2C3;J3KPG2;P13693;Q5W0H4	TRUE	TRUE
A0A0B4J2G4;Q15345;Q15345-3	TRUE	TRUE
A0A0C3SFZ9;M0QXD1;M0QY09;M0QZE1;M0QZI3;M0R1K4;M0R3E5;O14526;O14526-2;O14526-3	TRUE	TRUE
A0A0C4DFV0;Q9H469	TRUE	TRUE
A0A0C4DFW4;Q5JUR7	FALSE	TRUE
A0A0C4DFY5;A8MXZ4;J9JIE0;Q9NQ84;Q9NQ84-2	TRUE	TRUE
A0A0C4DFY7;Q6UWW8;Q6UWW8-2	FALSE	TRUE
A0A0C4DFZ2;P15289;P15289-2	TRUE	FALSE
A0A0C4DG17;C9J9K3;P08865	FALSE	TRUE
A0A0C4DG26;Q9NP71;Q9NP71-2;Q9NP71-3;Q9NP71-4;Q9NP71-6	TRUE	TRUE
A0A0C4DG40;Q8NF91;Q8NF91-4	FALSE	TRUE
A0A0C4DG90;A4D0S4;A4D0S4-3	TRUE	FALSE
A0A0C4DG95;C9IYJ2;E9PD56;F8WDF7;H7BYG4;Q7Z7A4;Q7Z7A4-2;Q7Z7A4-4;Q7Z7A4-6;W5RWE6	TRUE	FALSE
A0A0C4DGA6;Q14527;Q14527-2	TRUE	FALSE
A0A0C4DGB0;Q9UIL1;Q9UIL1-2;Q9UIL1-3	TRUE	TRUE
A0A0C4DGE7;Q86UK5;Q86UK5-2;Q86UK5-3	TRUE	TRUE
A0A0C4DGF7;Q6UXC1;Q6UXC1-2;Q6UXC1-3	TRUE	FALSE
A0A0C4DGG1;Q9UKS6	TRUE	FALSE
A0A0C4DGH6;A0JNW5	FALSE	TRUE
A0A0C4DGI4	TRUE	TRUE
A0A0C4DGM9;B7Z896;F5H3M2;Q9BVG8;Q9BVG8-2;Q9BVG8-4;Q9BVG8-5;Q9BVG8-6	FALSE	TRUE
A0A0C4DGN6;J3QRU8;Q9Y2X7;Q9Y2X7-3	TRUE	TRUE
A0A0C4DGP0;E7EU35;Q9UKF7-2	FALSE	TRUE
A0A0C4DGQ4;Q86W25	TRUE	TRUE
A0A0C4DGV4;E9PLX3;O43504;R4GMU8	TRUE	FALSE
A0A0C4DGZ4;Q9Y5U4	TRUE	TRUE
A0A0C4DH36	TRUE	TRUE
A0A0D2X7Z3;Q49AN0;Q49AN0-2	TRUE	TRUE
A0A0D9SEJ5;F5GY05;Q96EK7;Q96EK7-2	TRUE	FALSE
A0A0D9SEN7;A0A2R8Y7Z3;I3L0L0;Q13950;Q13950-2;Q13950-3	TRUE	TRUE
A0A0D9SEX5;Q9H6R6;Q9H6R6-2	TRUE	TRUE
A0A0D9SF44;A0A0R4J2E2;Q9Y3T6;Q9Y3T6-3	TRUE	FALSE
A0A0D9SF63;Q9BZK7	TRUE	TRUE
A0A0D9SFB1	TRUE	FALSE
A0A0D9SFG6;O43739;O43739-2;Q15438;Q15438-2;Q15438-3;Q99418;Q99418-2	FALSE	TRUE
A0A0D9SFR6;Q16760;Q16760-2;Q86XP1;Q86XP1-2;Q86XP1-3;Q86XP1-5	TRUE	TRUE
A0A0D9SFT8	FALSE	TRUE
A0A0D9SG71;P49459;P49459-3	TRUE	TRUE
A0A0G2JH30;A0A0G2JPX0;A0A2R8YFP9;A6NK88;P49918;P49918-2	FALSE	TRUE
A0A0G2JHC2;Q6NYC8	TRUE	FALSE
A0A0G2JI43;A0A0G2JIJ2;A0A140T926;A0A140T9C9;A0A140T9I2;A0A140T9R0;A0A140T9R2;A0A140T9T8;A0A140T9U6;F6UB75;P28068	TRUE	TRUE
A0A0G2JJP1;Q9C019	TRUE	FALSE
A0A0G2JLQ8;A0A0G2JLX3;A0A0G2JNC8;A0A0G2JP37;A0A0G2JPB6;A0A0G2JPQ2;F5H5B1;F5H7Q5;J3KN39;K7EJ90;K7ELX1;Q9NX02;Q9NX02-2;Q9NX02-3;Q9NX02-4	TRUE	TRUE
A0A0G2JMW3;A0A0G2JP44;Q9HBB8;Q9HBB8-2;Q9HBB8-4	TRUE	TRUE
A0A0G2JMZ6;O60282	TRUE	TRUE
A0A0G2JMZ8;Q16625	FALSE	TRUE
A0A0G2JN23;A0A0G2JQ38	TRUE	TRUE
A0A0G2JN42;A0A0G2JNJ8;Q6W4X9	TRUE	TRUE
A0A0G2JN84;P59817	TRUE	TRUE
A0A0G2JPC8;B4DTC2;E7EPX8;E7ER82;Q8TC27	FALSE	TRUE
A0A0G2JPZ6;A0A0J9YWU2;Q9H3Q3	TRUE	TRUE
A0A0G2JQ41;A0A1C7CYZ0;B7Z683;Q12979;Q12979-2;Q12979-4	TRUE	FALSE
A0A0G2JQC6;A0A0G2JQK9;A0A0G2JRT1;E7EWN1;Q99102-3	TRUE	TRUE
A0A0G2JS52;Q01538;Q01538-2	TRUE	TRUE
A0A0J9YVW4	TRUE	TRUE
A0A0J9YW63	TRUE	TRUE
A0A0J9YW64;A6NIW2;Q5JSL3	TRUE	FALSE
A0A0J9YWD2;A0A0J9YX19;A0A0J9YXY6;A0A0J9YYK8;A0A1B0GTJ5;A0A1B0GU79;A0A1B0GUR8;A0A1B0GVR1;Q9UBY8	TRUE	TRUE
A0A0J9YWE1;A0A0J9YWN0	TRUE	TRUE
A0A0J9YWL0;Q9Y4K1	TRUE	TRUE
A0A0J9YWV4;O75154;O75154-2;O75154-3;X6RFI8	TRUE	TRUE
A0A0J9YX34;A0A6Q8PEY7;A0A6Q8PF18;A0A6Q8PF63;A0A6Q8PF74;A0A6Q8PFB0;A0A6Q8PFI4;A0A6Q8PFM2;A0A6Q8PFS5;A0A6Q8PFV0;A0A6Q8PFX3;A0A6Q8PG16;A0A6Q8PGE9;A0A6Q8PGG4;A0A6Q8PGL5;A0A6Q8PH06;A0A6Q8PHE9;A0A6Q8PHG4;A0A6Q8PHP4;A0A6Q8PHR6;C9J084;Q9C040;Q9C040-2	TRUE	TRUE
A0A0J9YX66;A0A0J9YXJ0;A0A1B0GU44;A0A1B0GUN8;E9PC62;O95319;O95319-2;O95319-3;O95319-4;O95319-5;Q5VZZ6;V9GYD9	TRUE	TRUE
A0A0J9YXT0;H7C5H6;Q9H0F7;Q9H0F7-2	TRUE	FALSE
A0A0J9YY17;A0A1C7CYW8;A0A669KB38;Q8IVF4	TRUE	TRUE
A0A0J9YY72;A0A1W2PQQ1;Q5HYW2	FALSE	TRUE
A0A0J9YYF7;Q86T65;Q86T65-4	TRUE	TRUE
A0A0R4J2F3;P0DPB6	TRUE	TRUE
A0A0R4J2F6;Q12894;Q12894-2	TRUE	FALSE
A0A0S2Z4L7;O60603	TRUE	FALSE
A0A0U1RQE4;A0A494C1M0;Q5HYK7;Q5HYK7-2;Q5HYK7-3	TRUE	TRUE
A0A0U1RQK9	TRUE	FALSE
A0A0U1RQS4;A0A0U1RR93;Q9BYB0;Q9BYB0-3	FALSE	TRUE
A0A0U1RQW6;E7EPU2;Q9Y2E4	FALSE	TRUE
A0A0U1RQY4	TRUE	TRUE
A0A0U1RR06;Q9Y484;Q9Y484-2;Q9Y484-3	FALSE	TRUE
A0A0U1RR25	TRUE	TRUE
A0A0U1RRA6;B5MCG9;B5MCU0;H7C0E9;Q9Y2K5	TRUE	TRUE
A0A0U1RRL7	TRUE	FALSE
A0A126GWB3;P47888	FALSE	TRUE
A0A140LJL2;Q8N350	TRUE	TRUE
A0A140T9G8;Q0P5T2;Q5SQH8;Q5SQH8-2;Q5SQH8-4	FALSE	TRUE
A0A140TA01;E9PQT8;E9PQZ5;O43189;O43189-2	TRUE	TRUE
A0A182DWI4;E9PN30;Q9BQE4	TRUE	TRUE
A0A1B0GTB0;A0A1B0GTU8;A0A1B0GU12;A0A1B0GUT7;A0A1B0GVB9;A0A1B0GVC7;A0A1B0GVW0;A0A1B0GWJ8;A0A1C7CYW4;B7Z413;H7C3E1;O75787;O75787-2	TRUE	TRUE
A0A1B0GTF3;A0A6I8PIT5;A0A6I8PIW1;A0A6I8PLB1;O43301	TRUE	FALSE
A0A1B0GTG2;A0A1B0GW77;P49419;P49419-2	FALSE	TRUE
A0A1B0GTK6	FALSE	TRUE
A0A1B0GTM1;A0A1B0GUM5;E7ETX0;Q8NHX9	FALSE	TRUE
A0A1B0GTT2	TRUE	TRUE
A0A1B0GTU4	FALSE	TRUE
A0A1B0GTX1;A0A1C7CYY6;Q6XZF7;Q6XZF7-2	TRUE	FALSE
A0A1B0GUA3;A0A6Q8PGG2;A0A6Q8PH45;A0A6Q8PHL8;Q96EK5	TRUE	TRUE
A0A1B0GUC2;A0A1W2PP33;C9J7I0	TRUE	FALSE
A0A1B0GUF4	TRUE	TRUE
A0A1B0GUI1;Q6GYQ0;Q6GYQ0-2;Q6GYQ0-3;Q6GYQ0-4;Q6GYQ0-5;Q6GYQ0-6;Q6GYQ0-7	FALSE	TRUE
A0A1B0GUL3	TRUE	TRUE
A0A1B0GUN5	TRUE	TRUE
A0A1B0GUS7	TRUE	FALSE
A0A1B0GUZ2;P00797;P00797-2	FALSE	TRUE
A0A1B0GUZ7;Q14156;Q14156-2	FALSE	TRUE
A0A1B0GV48;D6RBC4;Q8NAP3	TRUE	FALSE
A0A1B0GV71;A0A1B0GW34;A0A1B0GWD3;B4DFF3;H3BNK7;H3BR00;O95086;Q13286;Q13286-2;Q13286-3;Q13286-4;Q13286-5;Q13286-7;Q2TA70;Q9UBD8	TRUE	TRUE
A0A1B0GVD5;A0A1B0GVP3;A0A1B0GW44;A0A1B0GWE8;P07339	TRUE	TRUE
A0A1B0GVI7;A0A2R8Y7G1;P35869	TRUE	TRUE
A0A1B0GVL3;Q05086;Q05086-2;Q05086-3	TRUE	TRUE
A0A1B0GVV8	FALSE	TRUE
A0A1B0GW05	FALSE	TRUE
A0A1B0GWB2	TRUE	TRUE
A0A1B0GWI2;O75503	TRUE	FALSE
A0A1W2PNF0;A0A1W2PNY6;A0A1W2PPE6;A0A1W2PPG9;A0A1W2PPH4;A0A1W2PQ13;A0A1W2PQ60;A0A1W2PQD6;A0A1W2PQH2;A0A1W2PQL8;A0A1W2PR66;A0A1W2PRN3;A0A1W2PRT7;A0A1W2PS45;A0A1W2PS77;A0A1W2PSA9;A0A1W2PSD1;Q9Y2D2;Q9Y2D2-2;Q9Y2D2-3	TRUE	TRUE
A0A1W2PNH8;A0A1W2PNQ8;A0A1W2PNR0;A0A1W2PNW5;A0A1W2PPB6;A0A1W2PPR7;A0A1W2PQA9;A0A1W2PQP4;A0A1W2PQZ1;A0A1W2PS19;K7ELE1;K7EPJ2;O95427	TRUE	TRUE
A0A1W2PNR9;Q9Y5U9	FALSE	TRUE
A0A1W2PNT1	TRUE	TRUE
A0A1W2PNU4;A0A286YES2;F8VYC4;P0DJD0;P0DJD1	FALSE	TRUE
A0A1W2PNW1;A0A494C0T4;H0YJH6;P42226;P42226-3	FALSE	TRUE
A0A1W2PNY5;A0A1W2PPP6;A0A1W2PQA7;A0A1W2PQZ6;A0A1W2PR08;A0A1W2PRF0;A0A1W2PRF5;A0A1W2PRJ0;A0A1W2PS93;A0A1X7SBS0;G5E9D4;Q96EB1;Q96EB1-2;Q96EB1-3	TRUE	FALSE
A0A1W2PNZ9;H7BXU7;Q15652;Q15652-3	TRUE	FALSE
A0A1W2PPB5;Q13873;Q13873-2	FALSE	TRUE
A0A1W2PPD8	TRUE	TRUE
A0A1W2PPH6	FALSE	TRUE
A0A1W2PPI5;Q5JSJ4	TRUE	TRUE
A0A1W2PPV0;A0A1W2PQG5;Q9Y5P2;Q9Y5P2-2	TRUE	TRUE
A0A1W2PQE7	TRUE	TRUE
A0A1W2PQM2	FALSE	TRUE
A0A1W2PQM3	TRUE	FALSE
A0A1W2PQP6;Q9BWL3;Q9BWL3-2;Q9BWL3-3;Q9BWL3-4;Q9BWL3-5;X6R6F3;X6R6S3	TRUE	FALSE
A0A1W2PQS6	TRUE	FALSE
A0A1W2PR28;A0A1W2PRJ5;A0A6Q8PFR7;Q5JU85;Q5JU85-3	TRUE	TRUE
A0A1W2PRI9;E9PNW5	TRUE	TRUE
A0A1W2PS43;Q14108	TRUE	TRUE
A0A1W2PS52	TRUE	TRUE
A0A1X7SBT1;Q9H1D0;Q9H1D0-2	FALSE	TRUE
A0A1X7SBY3;H0Y860;Q9P246;Q9P246-2	TRUE	TRUE
A0A1X7SBZ2;A0A5H1ZRQ2;Q92841	FALSE	TRUE
A0A286YEV4;A0A286YEV9;A0A286YEW8;A0A286YEX1;A0A286YF00;A0A286YF45;A0A286YF51;A0A286YF73;A0A286YFC6;A0A286YFE7;A0A286YFF5;A0A286YFH9;A0A286YFM2;B7Z2B2;E7ERQ4;Q8NHS3	FALSE	TRUE
A0A286YF37;Q9UK22	TRUE	TRUE
A0A286YFA5;Q8NGQ1	TRUE	TRUE
A0A286YFE3;A0A286YFF7;A0A286YFL8;A0A2C9F2P4;P50897;Q5T0S4	TRUE	TRUE
A0A2Q2TTZ9;P01593;P01594	TRUE	TRUE
A0A2Q3DQE3;Q13555;Q13555-10;Q13555-11;Q13555-2;Q13555-3;Q13555-4;Q13555-5;Q13555-6;Q13555-7;Q13555-8;Q13555-9;Q5SWX3;Q8WU40	FALSE	TRUE
A0A2R8Y2F6;P42336	TRUE	FALSE
A0A2R8Y3M9	FALSE	TRUE
A0A2R8Y471;Q12967;Q12967-2;Q12967-3;Q12967-4;Q12967-5;Q12967-6;Q5T7U6	TRUE	TRUE
A0A2R8Y478;A6NNI4;G8JLH6;P21926	TRUE	FALSE
A0A2R8Y484;Q08722;Q08722-2;Q08722-3;Q08722-4	TRUE	TRUE
A0A2R8Y491;E7EWD9;O95718;O95718-1;O95718-2	TRUE	TRUE
A0A2R8Y4F5	TRUE	TRUE
A0A2R8Y4M1;A0A2R8Y615;A0A2R8YGW2;A0A5F9ZHK1;Q9NZA1;Q9NZA1-2;Q9NZA1-3	TRUE	FALSE
A0A2R8Y4U4	FALSE	TRUE
A0A2R8Y4V0;A0A2R8Y4Z4;A0A2R8Y5D8;A0A2R8Y6Q0;A0A2R8YDG0;Q09428;Q09428-2	TRUE	FALSE
A0A2R8Y4W0	FALSE	TRUE
A0A2R8Y4W2;A0A2R8YE63;Q12929	TRUE	TRUE
A0A2R8Y4Z0;A0A2R8Y7W5;A0A2R8YF61;Q14004;Q14004-2	FALSE	TRUE
A0A2R8Y4Z8	TRUE	FALSE
A0A2R8Y524;A0A2R8YEC9;E9PFW2;O00462	TRUE	TRUE
A0A2R8Y549;Q8NI35;Q8NI35-2;Q8NI35-3;Q8NI35-4	FALSE	TRUE
A0A2R8Y5D3;A0A2R8YEZ4;O15160;O15160-2	TRUE	TRUE
A0A2R8Y5J4;Q9BYG8	TRUE	TRUE
A0A2R8Y5K2;Q96LT7	TRUE	FALSE
A0A2R8Y5Q8;A0A2R8YHI9;Q15813;Q15813-2	FALSE	TRUE
A0A2R8Y635;A0A2R8YDN7;Q9H7F0;Q9H7F0-2	TRUE	FALSE
A0A2R8Y640	TRUE	TRUE
A0A2R8Y653;Q9BZX2	TRUE	FALSE
A0A2R8Y6D0	FALSE	TRUE
A0A2R8Y6P2;A0A2R8YDC4;A6NFE3;C9J654;J3KR48;J3KR52	TRUE	FALSE
A0A2R8Y7B4	FALSE	TRUE
A0A2R8Y7D5	TRUE	TRUE
A0A2R8Y7E6;A0A5F9ZHX3;A0A5F9ZI57	TRUE	TRUE
A0A2R8Y7R4;B2RUZ4;H3BS66	TRUE	TRUE
A0A2R8Y7X9;P69891;P69892	TRUE	TRUE
A0A2R8Y849;A0A2R8Y8A0;A0A2R8YD14;E7ETK0;P62847;P62847-2;P62847-3;P62847-4	TRUE	TRUE
A0A2R8Y852;A0A2R8YDI1;P39880;P39880-2;P39880-3;P39880-4;P39880-5;P39880-6	TRUE	TRUE
A0A2R8Y880;Q7Z6E9;Q7Z6E9-2	TRUE	FALSE
A0A2R8YCL1;Q13322;Q13322-3;Q13322-4	FALSE	TRUE
A0A2R8YD49;A0A2R8YDU7;A0A2R8YEX0;Q9H1P3;Q9H1P3-2	FALSE	TRUE
A0A2R8YD85;Q96BY6;Q96BY6-3	TRUE	FALSE
A0A2R8YDD5;P30531	TRUE	TRUE
A0A2R8YDR8;Q9BZD2;Q9BZD2-2	TRUE	FALSE
A0A2R8YE10;Q9NRW7	TRUE	FALSE
A0A2R8YE69;P0CG41;Q8IX94	TRUE	TRUE
A0A2R8YEA1;B5MCJ9;O15016;O15016-2	TRUE	TRUE
A0A2R8YEH1	TRUE	TRUE
A0A2R8YEI5;P52757;P52757-9	TRUE	TRUE
A0A2R8YEM2;D6RG18;D6RHI7;P51946	TRUE	FALSE
A0A2R8YEM9;O15050	TRUE	TRUE
A0A2R8YF72;A0A3B3IRF0;A0A3B3IRT9;A0A3B3IRX5;A0A3B3ISI4;A0A3B3ISW5;A0A3B3ITJ8;A0A3B3ITL3;A0A3B3ITS6;A0A3B3IUE2;H7BYU4;Q9UL68;Q9UL68-4	TRUE	TRUE
A0A2R8YFW3;O60907;O60907-2	TRUE	TRUE
A0A2R8YHG5;Q9BZV2	FALSE	TRUE
A0A2U3TZK7	FALSE	TRUE
A0A2U3TZL5;E9PNW4;P13987;P13987-2	TRUE	TRUE
A0A2U3TZT9	TRUE	TRUE
A0A2U3TZV8;Q4KWH8;Q4KWH8-2;Q4KWH8-3;Q4KWH8-4	TRUE	TRUE
A0A384DVU0;Q8IY17;Q8IY17-2;Q8IY17-3	FALSE	TRUE
A0A3B3IRI9;A0A3B3IRJ3;A0A3B3IRV1;A0A3B3IRZ0;A0A3B3IS37;A0A3B3IS68;A0A3B3ISJ4;A0A3B3IT04;A0A3B3IT30;A0A3B3ITZ3;A0A3B3IU52;A6NFW1;A6NGJ7;Q9BY41;Q9BY41-4	TRUE	TRUE
A0A3B3IRJ9;Q9Y2H2	TRUE	FALSE
A0A3B3IRK5;Q9H2D1	FALSE	TRUE
A0A3B3IRL5;C9J381;P20839;P20839-2;P20839-3;P20839-4;P20839-5;P20839-6;P20839-7	FALSE	TRUE
A0A3B3IRM7	FALSE	TRUE
A0A3B3IRP9	TRUE	FALSE
A0A3B3IRS4;A0A3B3IRX3;A0A3B3IS46;H0YHC1;Q71F56	FALSE	TRUE
A0A3B3IRU6;A0A3B3ISL2;Q9GZU2;Q9GZU2-2;Q9GZU2-4	TRUE	TRUE
A0A3B3IRY8	TRUE	TRUE
A0A3B3IS13	FALSE	TRUE
A0A3B3IS40;A0A3B3ISE6;A0A3B3IT25;A0A3B3ITA8;A0A3B3ITA9;A0A3B3ITE7;A0A3B3ITJ7;B3KV94;Q9UGL1;Q9UGL1-2	TRUE	TRUE
A0A3B3IS62;A0A3B3ITD6;A0A3B3ITI5;Q9Y672;S4R350	TRUE	TRUE
A0A3B3ISF9;P42892;P42892-2;P42892-3;P42892-4	TRUE	TRUE
A0A3B3ISP1;A0A3B3ITU5;Q92625;Q92625-2	FALSE	TRUE
A0A3B3ISS6	TRUE	FALSE
A0A3B3IST1;B5MD23;O75954	TRUE	TRUE
A0A3B3ISV3;P02462	FALSE	TRUE
A0A3B3ISV4	TRUE	TRUE
A0A3B3ISV8;A0A6Q8PF19;A0A6Q8PFS9;A0A6Q8PHH0;Q8IZF0	TRUE	TRUE
A0A3B3IT21	FALSE	TRUE
A0A3B3IT28;A0A3B3ITE5;A0A3B3ITF7;A0A3B3ITW6;A0A3B3IU40;A0A3B3IUA1;A0A3F2YNW9;Q12756;Q12756-2;Q12756-3	TRUE	TRUE
A0A3B3IT31;Q9NUN5;Q9NUN5-3	TRUE	TRUE
A0A3B3IT37;Q5SXQ3;Q5SXQ5;Q8IYK4	TRUE	FALSE
A0A3B3IU42;G5EA29;H0YDP6;H0YEL0;O14893;O14893-2;O14893-3	TRUE	FALSE
A0A3B3IU69;F8W717;O00423;O00423-3	FALSE	TRUE
A0A3B3IUC4;A0A6Q8PFA9;P06280	TRUE	TRUE
A0A3B3IUD4;P21453	TRUE	TRUE
A0A494BWY4;Q6IEE7	TRUE	FALSE
A0A494BXY3;E9PLD3;E9PRG8	TRUE	TRUE
A0A494BZU6;A0A494BZW7;A0A494C002;A0A494C0P9;A0A494C0Q2;A0A494C0Q6;A0A494C0W0;A0A494C156;A0A494C1K5;A0A494C1N1;O95453;O95453-2	TRUE	FALSE
A0A494BZV4;A0A494C069;Q08AG5	TRUE	TRUE
A0A494C004;A0A494C0C5;A0A494C0D2;A0A494C0V5;A0A494C141;A0A494C1C6;A0A499FJ53;A6XNE1;F6Y2X3;Q16635;Q16635-2;Q16635-3;Q16635-4;Q16635-5;Q16635-6;Q16635-7;Q16635-8;Q16635-9	FALSE	TRUE
A0A494C039	TRUE	TRUE
A0A494C0J7;Q08188	TRUE	FALSE
A0A494C0M2;O95925-3;Q9BQY6;Q9BQY6-2	TRUE	TRUE
A0A494C0N4;H9KV93;Q7Z4L5	TRUE	TRUE
A0A494C0Z5;Q9H082	TRUE	TRUE
A0A494C105;Q9H3U5;Q9H3U5-3;Q9H3U5-5;Q9H3U5-6	TRUE	TRUE
A0A494C115;A0A494C1U4;K7N7A8;P29972;P29972-2;P29972-3;P29972-4	TRUE	TRUE
A0A494C143;Q14689;Q14689-6	TRUE	FALSE
A0A494C167;Q9UHD2	TRUE	FALSE
A0A494C193;Q08E93	TRUE	TRUE
A0A494C1C4;P78552;P78552-2	TRUE	FALSE
A0A494C1J8	FALSE	TRUE
A0A494C1T9;Q6ZRV2	TRUE	TRUE
A0A494C1V1;Q6ZNJ1;Q6ZNJ1-2;Q6ZNJ1-3	TRUE	TRUE
A0A499FIS5;A0A499FJN1;A0A499FJS1;Q9BUB5;Q9BUB5-2;Q9BUB5-3	TRUE	TRUE
A0A539;A0A589	TRUE	TRUE
A0A590UJ46	FALSE	TRUE
A0A590UJ50;A0A590UJR3;Q13616	TRUE	TRUE
A0A590UJ62;E7ETH1;Q14003	TRUE	TRUE
A0A590UJ73;A0A590UJW4;E7EQB3;Q9BSV6	FALSE	TRUE
A0A590UJB6	FALSE	TRUE
A0A590UJF0;P63092-3	FALSE	TRUE
A0A590UJK3;Q14BN4;Q14BN4-2;Q14BN4-3	FALSE	TRUE
A0A590UJL0;P08842	TRUE	TRUE
A0A590UJY5	TRUE	FALSE
A0A590UK87	TRUE	TRUE
A0A5E8;Q99501;Q99501-2;Q99501-3;Q99501-4	TRUE	TRUE
A0A5F9UY30;A0A5H1ZRP2;O43493;O43493-3;O43493-5;O43493-7	TRUE	TRUE
A0A5F9YLF9	FALSE	TRUE
A0A5F9ZGN6	TRUE	TRUE
A0A5F9ZGW5;C9J8U3;Q7Z2E3-13;Q7Z2E3-5;Q7Z2E3-7;Q7Z2E3-9	TRUE	TRUE
A0A5F9ZGX0	TRUE	TRUE
A0A5F9ZGX3;A0A5F9ZGY3;A0A5F9ZGY4;A0A5F9ZGZ5;A0A5F9ZH19;A0A5F9ZH30;A0A5F9ZHD2;A0A5F9ZHE4;A0A5F9ZHN5;A0A5F9ZHR8;A0A5F9ZHS1;A0A5F9ZI30;A0A5F9ZI40;A0A5F9ZI65;D6RHE1;I6L894;Q01484	TRUE	TRUE
A0A5F9ZH43;A0A5F9ZHW6;A4UGR9-4;A4UGR9-5;A4UGR9-6;A4UGR9-7	TRUE	FALSE
A0A5F9ZH85	TRUE	FALSE
A0A5F9ZHQ6;A0A6I8PIF8;A0A6I8PIP2;A0A6I8PU78;O75071;S4R3Q1	TRUE	FALSE
A0A5F9ZI21;Q92974;Q92974-2;Q92974-3;V9GYF0;V9GYM8	FALSE	TRUE
A0A5F9ZI76;Q32ZL2;Q32ZL2-2	TRUE	TRUE
A0A5K1VW66;P35240;P35240-2;P35240-3;P35240-4;P35240-5;P35240-6;P35240-8	TRUE	TRUE
A0A5K1VW70;P98198;P98198-3	TRUE	FALSE
A0A669KA36;A0A669KB88;B7ZLR4;E7ET55;F5H748;P35670;P35670-2;P35670-4	TRUE	FALSE
A0A669KAX3;O76024	FALSE	TRUE
A0A669KAX4;K4DI93;Q13620;Q13620-1;Q13620-3	TRUE	FALSE
A0A669KAY5;A0A669KB27;A0A669KBH7;C9JTE9;Q9UHQ4;Q9UHQ4-2	FALSE	TRUE
A0A669KB41;A0A669KBH5;D6RA31;E7EPV7;P37840;P37840-2;Q16143	TRUE	FALSE
A0A669KB69;Q6Q788	TRUE	FALSE
A0A669KB71;O94842;O94842-2;O94842-3	TRUE	TRUE
A0A669KB81	FALSE	TRUE
A0A669KBG1	TRUE	FALSE
A0A669KBH1	TRUE	TRUE
A0A669KBJ1;Q9P202;Q9P202-3;Q9P202-4	TRUE	FALSE
A0A669KBJ4;E7ERL6;Q6P0Q8;Q6P0Q8-2	TRUE	TRUE
A0A6E1WB48;Q14541;Q14541-2	TRUE	TRUE
A0A6I8PRM6;B1ALU3;O95490-2;O95490-5	TRUE	FALSE
A0A6I8PTZ8;Q9UL18	FALSE	TRUE
A0A6I8PU65;Q9NUD9	TRUE	TRUE
A0A6Q8PF03	TRUE	TRUE
A0A6Q8PF14	FALSE	TRUE
A0A6Q8PF62;A0A6Q8PF70;A0A6Q8PF86;A0A6Q8PFJ3;A0A6Q8PG59;A0A6Q8PGB4;A0A6Q8PGP4;A0A6Q8PGY4;A0A6Q8PGY7;A0A6Q8PHA1;A0A6Q8PHC7;A0A6Q8PHH5;A0A6Q8PHK3;A0A6Q8PHP5;Q92562	TRUE	FALSE
A0A6Q8PFG0;A0A6Q8PGT4;A0A6Q8PH04;A0A6Q8PHN3;A0A6Q8PHP9;Q9P212;Q9P212-2	TRUE	FALSE
A0A6Q8PFI8;P11166	TRUE	TRUE
A0A6Q8PG52;A0A6Q8PH84;P51149	TRUE	FALSE
A0A6Q8PG54;G3XAG5;P51793;P51793-2	FALSE	TRUE
A0A6Q8PGM6;Q9UJY1	FALSE	TRUE
A0A6Q8PH13;A0A6Q8PH87;Q86WG5;Q86WG5-3	TRUE	TRUE
A0A6Q8PHP0;P49902;P49902-2	TRUE	FALSE
A0AV96-2	FALSE	TRUE
A0AVL1;F8WC54;Q13443;Q13443-2	TRUE	TRUE
A0PJZ3;C9JND4	TRUE	TRUE
A0RZB6	TRUE	TRUE
A1A4S6;H0Y8W5	FALSE	TRUE
A1A5C7;A1A5C7-2;A1A5C7-3;C9J4Z0	TRUE	TRUE
A1L390;A1L390-3	FALSE	TRUE
A2A2N0;O60676	FALSE	TRUE
A2A2V1;P04156	TRUE	TRUE
A2VDJ0;A2VDJ0-3;A2VDJ0-5	TRUE	FALSE
A3KFL2;Q13868;Q13868-2;Q13868-3	FALSE	TRUE
A3KN83;A3KN83-2;A3KN83-3	FALSE	TRUE
A5D8V6;F5H4Q5	FALSE	TRUE
A5PLN9;A5PLN9-2;A5PLN9-4;A5PLN9-5	TRUE	TRUE
A6NCE7;H3BTL1;Q9GZQ8	TRUE	TRUE
A6NCS6	TRUE	FALSE
A6NDL8	TRUE	TRUE
A6NDR6	TRUE	TRUE
A6NDU8	TRUE	TRUE
A6NE01;F5GYN0;F5H8C1	FALSE	TRUE
A6NED2;G3V2I3	FALSE	TRUE
A6NFQ9;F8W8I8	FALSE	TRUE
A6NFS0;Q9NSD4;Q9NSD4-2	TRUE	TRUE
A6NFV8;D6RCT8	TRUE	TRUE
A6NGA6;Q5H9D4;Q9Y5S8;Q9Y5S8-2;Q9Y5S8-3	TRUE	FALSE
A6NGL4;P0CW00	TRUE	TRUE
A6NGQ3;Q5VST9;Q5VST9-2;Q5VST9-6	TRUE	FALSE
A6NGU5;B5MCK8;P19440	TRUE	FALSE
A6NGY7;Q9H694-2	TRUE	FALSE
A6NHG8;Q13114	FALSE	TRUE
A6NHJ8;A6NND8;C9JAL0;C9K0F7;H7C3I5;O95825;O95825-2	TRUE	FALSE
A6NI28;E9PJK4	TRUE	FALSE
A6NI72;A8MVU1;C9J155;P14598;P14598-2	TRUE	TRUE
A6NIV6	TRUE	TRUE
A6NK44;H7C348	TRUE	TRUE
A6NKB5-2	TRUE	FALSE
A6NKD9	TRUE	TRUE
A6NKZ2;P51606	TRUE	TRUE
A6NLH6;Q9P003	TRUE	FALSE
A6NMH6;Q92599;Q92599-2;Q92599-4	TRUE	TRUE
A6NMV7	FALSE	TRUE
A6NMZ5	FALSE	TRUE
A6NN50;O75147;O75147-1;O75147-2;O75147-4	TRUE	FALSE
A6NP16;E7ERM3;Q4VCS5;Q4VCS5-2	TRUE	TRUE
A6PVY1;A6PVY2;A6PVY3;A6PVY3-2	FALSE	TRUE
A6PW57;Q99755;Q99755-3;Q99755-4	TRUE	FALSE
A6XND0;A6XND1;B3KWK7;C9JMX4;H0Y5K2;P17936;P17936-2	TRUE	FALSE
A7KAX9;A7KAX9-2	TRUE	FALSE
A7XZE4;Q3SX28	TRUE	TRUE
A8DPD7;Q9C0D3	TRUE	TRUE
A8MPP7;A8MPY5;E7ETV6;Q9UPE1;Q9UPE1-2;Q9UPE1-3;Q9UPE1-4	TRUE	TRUE
A8MQ02	TRUE	TRUE
A8MQB8;G3V0J0;Q06787-2	TRUE	TRUE
A8MSI8;D6RAR2;D6RFL2;J3KTA2	TRUE	FALSE
A8MSY1;C9JYJ2;Q8IVN3	FALSE	TRUE
A8MT69;A8MT69-2;A8MT69-3;J3QR01;J3QRS1	FALSE	TRUE
A8MUM1;Q53HC9	TRUE	FALSE
A8MVV6;E9PN41;E9PPX8;E9PSH3;J3KQ42;O14817	FALSE	TRUE
A8MVZ6;Q96G01;Q96G01-3;Q96G01-4	TRUE	TRUE
A8MYZ0	TRUE	TRUE
A8TX70;A8TX70-2;E9PAL5	TRUE	TRUE
A9J4F5;O00488	TRUE	FALSE
B0QY95;Q9NQG6	TRUE	TRUE
B0QYF8;P02144	TRUE	TRUE
B0QYP2;O95931	TRUE	FALSE
B0QZA9;Q6QHF9;Q6QHF9-4	FALSE	TRUE
B0YIW2;P02656	TRUE	TRUE
B1AHB1	TRUE	TRUE
B1AJQ6;Q86Y82	FALSE	TRUE
B1AJS1;O14525;O14525-2;O14525-3	TRUE	TRUE
B1AK61;Q5VTY9;Q5VTY9-2;Q5VTY9-3;Q5VTY9-5;Q5VTY9-6;Q5VTY9-7	FALSE	TRUE
B1AKC9;P29323;P29323-2;P29323-3	FALSE	TRUE
B1AKG0;Q03591	TRUE	TRUE
B1AKI6;Q9NUK0;Q9NUK0-2	FALSE	TRUE
B1ALD1;Q9Y6B7	TRUE	TRUE
B1ALM5;Q9P0T7	TRUE	TRUE
B1AM21	TRUE	FALSE
B1AM27;O14795;O14795-2	TRUE	FALSE
B1AMI2	TRUE	FALSE
B1AMN7;Q9P2B4	FALSE	TRUE
B1AMS2;Q14141;Q14141-2;Q14141-4	TRUE	TRUE
B1ANE6	TRUE	TRUE
B1APN9;O75335	TRUE	FALSE
B1AQK6;B1AQK7;E9PDR3;F6RH32;Q00975;Q00975-2	TRUE	TRUE
B1AVT0;P49760;P49760-3	FALSE	TRUE
B2RC85;B2RC85-2;H0YFY2;P0C881	FALSE	TRUE
B2WTI3;B2WTI4;K7EJU9;Q6NYC1;Q6NYC1-2;Q6NYC1-3	TRUE	FALSE
B3KP42	FALSE	TRUE
B3KP96;H0Y626;J3QKY5;K7EL43;K7ENN8;O95361;O95361-2	TRUE	TRUE
B3KS81	FALSE	TRUE
B3KT41;Q496J9	FALSE	TRUE
B3KUS5;Q70CQ3	TRUE	FALSE
B3KVY5;F5GWA4;F5GWK6;F5H268;Q9H3F6;Q9H3F6-2;Q9H3F6-3	TRUE	TRUE
B4DFC0;E9PMV6;E9PR50;G3V1B4;H0YD20;H0YE53;H0YEL8;Q9UGK8;Q9UGK8-2	TRUE	TRUE
B4DJ07	FALSE	TRUE
B4DJV5;Q13610	FALSE	TRUE
B4DUJ5;Q8IWP9	TRUE	TRUE
B4DVT3;Q96SY0	TRUE	FALSE
B4DYU2;H3BQV3;Q96MW5	TRUE	FALSE
B4DYY6;Q75T13;Q75T13-2;Q75T13-3	TRUE	TRUE
B4E0E3;G3V1M5;Q9H6X4;Q9H6X4-2;Q9H6X4-3	TRUE	TRUE
B5MC20;P0C870	FALSE	TRUE
B5MC51;P53671-3	TRUE	FALSE
B5MC53;B5MCF8;E7EX18;G5E9F5;P39210	TRUE	FALSE
B5MCQ6;B5MCU6;B5MCV5;E7ETT9;Q96DB2;Q96DB2-2	TRUE	TRUE
B5MCX7;C9JX82;D3YTC9;F8WB76;H7C3L3;Q6NXT1;Q6NXT1-2	TRUE	FALSE
B5MDL5;P53778;P53778-2	TRUE	FALSE
B5MDU6;Q9H6V9;Q9H6V9-2	TRUE	TRUE
B5ME97;E7EW69;E7EX04;Q9P0V9;Q9P0V9-2;Q9P0V9-3	FALSE	TRUE
B7WNR7;Q5HYL7-4	TRUE	TRUE
B7WPL0;Q9NVN3;Q9NVN3-1;Q9NVN3-3	TRUE	TRUE
B7WPL9;F8W9A8;Q6PFW1;Q6PFW1-2;Q6PFW1-3;Q6PFW1-4;Q6PFW1-5;Q6PFW1-6;Q6PFW1-7	TRUE	TRUE
B7Z4S1	TRUE	FALSE
B7Z4W8;E9PD09;Q96HH9;Q96HH9-2;Q96HH9-3;Q96HH9-4;Q96HH9-5	TRUE	TRUE
B7Z5P7;O60711;O60711-2	TRUE	TRUE
B7Z7D2;E9PQY3;P11117	TRUE	FALSE
B7Z8H2;O14717;O14717-2;O14717-3;O14717-4;O14717-5;O14717-6;Q7Z3E4	FALSE	TRUE
B7ZAQ6;B7ZAQ6-2;B7ZAQ6-3;P0CG08	TRUE	TRUE
B7ZBB8	TRUE	FALSE
B7ZBC8;B7ZBC9;O75449	FALSE	TRUE
B7ZLQ8;E5RJM0;Q17RY0;Q17RY0-2	FALSE	TRUE
B7ZM68;Q6ZNL6;Q6ZNL6-2	TRUE	FALSE
B8ZZ50;B9A044;C9JEL3;O60573;O60573-2	TRUE	FALSE
B8ZZ98;Q8WVK2	TRUE	TRUE
B8ZZD4;Q86VP1;Q86VP1-2;Q86VP1-3;Q86VP1-4	TRUE	TRUE
B8ZZF5;C9J5M4;Q9H8M9	TRUE	FALSE
B8ZZY8	FALSE	TRUE
B9A063;Q6PIF6	TRUE	FALSE
B9EJG8;B9EJG8-2;D6RAQ9;D6RDW6	FALSE	TRUE
C4AMC7;Q6VEQ5	TRUE	FALSE
C9IYT0	TRUE	TRUE
C9J066;E9PN67;Q8N4C6;Q8N4C6-10;Q8N4C6-11;Q8N4C6-2;Q8N4C6-4;Q8N4C6-5;Q8N4C6-6;Q8N4C6-7;Q8N4C6-9	TRUE	FALSE
C9J0A4;P57723;P57723-2	TRUE	TRUE
C9J0I9;Q86WB0;Q86WB0-2;Q86WB0-3	FALSE	TRUE
C9J2P9;Q75N03;Q75N03-2	TRUE	TRUE
C9J365;C9JA28;Q9UNL2;Q9UNL2-2	FALSE	TRUE
C9J4Z3;P61513	TRUE	TRUE
C9J555;J3QLM1;J3QLS1;Q14849	TRUE	TRUE
C9J597;C9JF31;Q9BV87	TRUE	TRUE
C9J6K0;Q13103	TRUE	TRUE
C9J6P4;Q7Z2W4	FALSE	TRUE
C9J6W0	TRUE	TRUE
C9J798;E5RK78;E7ERK1;F5GXT2;F8W6L0;O43374;O43374-2	FALSE	TRUE
C9J7E8;Q9UL63;Q9UL63-2	FALSE	TRUE
C9J7K9;C9J9P4;H7C5I5;O15162;O15162-2	FALSE	TRUE
C9J813	FALSE	TRUE
C9J8T4;C9JYN7;O43567	FALSE	TRUE
C9JA90	TRUE	FALSE
C9JBG5;E9PMC3;F5H8L4;Q8NBJ9;Q8NBJ9-2	TRUE	TRUE
C9JDZ2;Q9NVQ4;Q9NVQ4-2;Q9NVQ4-3	TRUE	FALSE
C9JEK0;C9JP86;Q08AI8	FALSE	TRUE
C9JER6;P61366	TRUE	TRUE
C9JF50;E9PLU1;E9PRK5;E9PRW1;E9PSD6;Q9H019;Q9H019-2;Q9H019-3	TRUE	TRUE
C9JFX4;E9PLG6;E9PSD9;Q6IA17;Q6IA17-2	TRUE	TRUE
C9JIT1	TRUE	TRUE
C9JIZ6;P07602;P07602-2;P07602-3	TRUE	FALSE
C9JJM2;Q96MV1;S4R434	TRUE	TRUE
C9JJX6;E9PDC3;O00192;O00192-2	TRUE	TRUE
C9JK83;O95630;O95630-2	FALSE	TRUE
C9JKL2;C9JPX5;O95772;O95772-2	TRUE	FALSE
C9JLW8;I3L2L5;I3L4Q0	TRUE	FALSE
C9JNE2;Q9Y530	TRUE	FALSE
C9JNW5;C9JXB8;P83731	FALSE	TRUE
C9JPG5;Q13275;Q13275-2	TRUE	TRUE
C9JQ41;H7C525;Q4VC31	TRUE	TRUE
C9JQV0;H7C0T1;H7C2R9;Q9BRJ6	FALSE	TRUE
C9JSU1;Q9Y608;Q9Y608-2;Q9Y608-4;Q9Y608-5	FALSE	TRUE
C9JUQ8	FALSE	TRUE
C9JW74;C9JWU9;Q5EB52;Q5EB52-2;Q5EB52-3	FALSE	TRUE
C9JXM5;G5E9W1;Q7Z3E1	FALSE	TRUE
C9JY79;M0QZQ3;Q9H254;Q9H254-4	TRUE	TRUE
C9JYM0;O75817	TRUE	FALSE
C9JYS5;J3KS67;J3QL47;J3QL63;K7ENL4;Q96ET8-3;Q9NYZ1	FALSE	TRUE
C9JZB3;Q16821	FALSE	TRUE
C9JZF7;G5E9W2;Q9P2E5;Q9P2E5-2	FALSE	TRUE
C9JZR2;O60716;O60716-10;O60716-11;O60716-13;O60716-2;O60716-3;O60716-5;O60716-9	TRUE	FALSE
C9K0I9	TRUE	TRUE
D3DQV9;H0Y3P2;P78344;P78344-2	FALSE	TRUE
D3DUJ3;K7EIE9;K7EQG9;P17706;P17706-2;P17706-3;P17706-4	TRUE	TRUE
D5H3J5;Q2L6G2	TRUE	TRUE
D6R9C7	FALSE	TRUE
D6R9S2;D6RIC1;H0Y8L2;H0YEZ3;H0YJP6;P59282	TRUE	TRUE
D6R9S7;D6RDB0;D6RHE3;Q96GZ6;Q96GZ6-2;Q96GZ6-5;Q96GZ6-6;Q96GZ6-7;Q96GZ6-9	TRUE	FALSE
D6RA47;D6RE79;D6RIZ4;Q14728	TRUE	FALSE
D6RAD5	FALSE	TRUE
D6RAJ6;Q9UKT5;Q9UKT5-2	TRUE	TRUE
D6RAN1;D6RF83;D6RH06;H7BYK4;Q9NR12;Q9NR12-2;Q9NR12-3;Q9NR12-4;Q9NR12-5;Q9NR12-6	TRUE	FALSE
D6RAZ3;E7EMP6;Q96FZ2	FALSE	TRUE
D6RBN6	TRUE	TRUE
D6RBR7;Q9Y3S2	TRUE	FALSE
D6RCM8;O95379;O95379-2;O95379-3;O95379-4	TRUE	TRUE
D6RDG3	TRUE	TRUE
D6RDG8;D6RGZ4;O43791	FALSE	TRUE
D6RDK6	TRUE	TRUE
D6RF35;P02774;P02774-3	TRUE	FALSE
D6RF43	TRUE	TRUE
D6RF86;P55285;P55285-2	TRUE	FALSE
D6RFI1	TRUE	TRUE
D6RGG3;Q99715;Q99715-4	TRUE	TRUE
D6RGK9;H0Y9C1;H0Y9Z5;Q96LI5	FALSE	TRUE
D6RGZ3;Q8N1W1;Q8N1W1-3;Q8N1W1-4;Q8N1W1-5;Q8N1W1-6	TRUE	TRUE
D6RH21	TRUE	TRUE
D6RHG0;P78383	TRUE	FALSE
D6RHH9;Q8TCT1;Q8TCT1-2;Q8TCT1-3	FALSE	TRUE
D6RHX8;F8W9W2;P43250;P43250-2;P43250-3	FALSE	TRUE
D6RIG4;Q9HCL0;Q9HCL0-2	FALSE	TRUE
D6RJG9;Q9Y5W7;Q9Y5W7-2;Q9Y5W7-3;Q9Y5W7-4	FALSE	TRUE
E2QRK7;Q5JTD0;Q5JTD0-2	FALSE	TRUE
E3W980;E3W982;Q8TDG4	TRUE	TRUE
E5RFT4;Q8N4L2	TRUE	FALSE
E5RFX7	FALSE	TRUE
E5RGB7;E5RGH1;H0YBV9;Q7Z388	TRUE	FALSE
E5RGZ2;H0YKJ1;Q6NT76;Q6NT76-2;Q6NT76-3;Q6NT76-5	TRUE	TRUE
E5RHC5;Q8N6T3;Q8N6T3-3	TRUE	FALSE
E5RIA2;E7EUF1;Q13822;Q13822-2;Q13822-3	TRUE	FALSE
E5RIT6;Q9UNX3	TRUE	FALSE
E5RIW9;P28328	TRUE	TRUE
E5RJ29;Q9NYI0;Q9NYI0-2	TRUE	TRUE
E5RK69	TRUE	FALSE
E7EM72;E7EWQ4;O75912	FALSE	TRUE
E7EMC7;Q13501	TRUE	FALSE
E7EMD6;O43572	TRUE	TRUE
E7EMK3;J3QLD9;Q14254	TRUE	TRUE
E7EMS2;G3V3D1;G3V3E8;J3KMY5;P61916	TRUE	FALSE
E7EMT6;E7ENY2;E7EQA9;E7EV32;E7EVA2;E7EW82;H7C3L4;Q92844	FALSE	TRUE
E7EN24;Q12864	FALSE	TRUE
E7EN73;Q8IZA0;Q8IZA0-2	TRUE	FALSE
E7EN91;Q9BWF2	TRUE	FALSE
E7ENV7	TRUE	TRUE
E7ENY0;E7EV99;P35611;P35611-2;P35611-3;P35611-6	TRUE	TRUE
E7EP72;Q9UFG5	TRUE	TRUE
E7EPG1;Q13201	TRUE	FALSE
E7EPK1;E7ES33;Q16181;Q16181-2	TRUE	TRUE
E7EPS8;P28827;P28827-2	TRUE	TRUE
E7EQH1;E9PMB7;E9PR55;Q8NFJ9;Q8NFJ9-2;Q8NFJ9-3	FALSE	TRUE
E7EQM8;J3QRM6;J3QS93;P43146	TRUE	FALSE
E7EQQ5;Q9C035;Q9C035-2;Q9C035-3;Q9C035-4;Q9C035-5;Q9C035-6	FALSE	TRUE
E7EQY1;Q96C01	TRUE	FALSE
E7ER45;O43451	TRUE	FALSE
E7ERS3;Q86VM9	TRUE	FALSE
E7ES84;P50748	FALSE	TRUE
E7ES96;P49768;P49768-2	FALSE	TRUE
E7ESD2;Q641Q2;Q641Q2-2	TRUE	FALSE
E7ESF6;Q13094	FALSE	TRUE
E7ESK6;E9PBI9;P34741	TRUE	TRUE
E7ESP4;P17301	TRUE	TRUE
E7ET49;Q8NCG7;Q8NCG7-2;Q8NCG7-4	TRUE	TRUE
E7ETU5;F6Y5H0;P29558;P29558-2	FALSE	TRUE
E7EVC7;Q676U5;Q676U5-2	FALSE	TRUE
E7EVE9;P18074	TRUE	TRUE
E7EVJ5;Q96F07;Q96F07-2	FALSE	TRUE
E7EVM0;H0YBR7;H0YBY1;P01266;P01266-2	FALSE	TRUE
E7EWM1;Q15596	FALSE	TRUE
E7EWX8	TRUE	TRUE
E7EX40;Q6WKZ4;Q6WKZ4-2;Q6WKZ4-3	TRUE	FALSE
E9PAM5	TRUE	TRUE
E9PAV3;E9PAV3-2;F8VZJ2;F8W0W4;H0YHX9;Q13765	TRUE	FALSE
E9PB90;P52789	TRUE	FALSE
E9PBF9;H7C2N6;P15336	TRUE	TRUE
E9PBP6	FALSE	TRUE
E9PC53;H7C3N0;Q8TBK2;Q8TBK2-2	TRUE	TRUE
E9PC61;G4U4J3;Q8NDF8;Q8NDF8-2;Q8NDF8-3;Q8NDF8-5	TRUE	FALSE
E9PC66;P17029	TRUE	TRUE
E9PCJ7;G3V336;Q8N806	TRUE	TRUE
E9PCP0;F5H0S8;F5H100;F5H8J8;P16520;P16520-2	TRUE	TRUE
E9PCX5	TRUE	TRUE
E9PD50;Q92540;Q92540-2;Q92540-4	TRUE	TRUE
E9PD53;Q9NTJ3;Q9NTJ3-2	FALSE	TRUE
E9PD68;Q14194;Q14194-2	TRUE	TRUE
E9PDE8	TRUE	TRUE
E9PEQ6	TRUE	TRUE
E9PEW8	FALSE	TRUE
E9PFF8	TRUE	FALSE
E9PFK9;Q9UJ41;Q9UJ41-3;Q9UJ41-4	FALSE	TRUE
E9PG19;O94868;O94868-2	FALSE	TRUE
E9PG32;Q6ZR08	FALSE	TRUE
E9PG40;P05067;P05067-11;P05067-7;P05067-8;P05067-9	TRUE	TRUE
E9PG71;P54764;P54764-2	TRUE	TRUE
E9PGM7;O94988;O94988-1;O94988-3;O94988-5;O94988-6	TRUE	TRUE
E9PGT6;Q99627	TRUE	FALSE
E9PHI4;O94901-9	FALSE	TRUE
E9PHR9;Q9NRQ2;Q9NRQ2-2	TRUE	TRUE
E9PHX8;H7C3L9;Q12866	TRUE	FALSE
E9PHY8;Q8NDA8	TRUE	FALSE
E9PIC5;Q8N4M1-4;Q8N4M1-5;Q8N4M1-6	FALSE	TRUE
E9PIF4;Q99519	TRUE	TRUE
E9PIH9;F8WA39;H0YDX3;Q13613;Q13613-2;Q8NEC6	TRUE	TRUE
E9PIZ1	TRUE	FALSE
E9PIZ2;H0YDB8;Q8N3Y3	TRUE	TRUE
E9PJE4;Q9GZQ3	FALSE	TRUE
E9PJN9	TRUE	TRUE
E9PJW8;E9PQA6;Q96EY5;Q96EY5-2;Q96EY5-3	TRUE	TRUE
E9PKA8;E9PQL5;E9PSC8;Q6ZUT1;Q6ZUT1-2;Q6ZUT1-3	TRUE	FALSE
E9PKC0;Q6IQ23;Q6IQ23-2	TRUE	FALSE
E9PKG1;Q99873;Q99873-2;Q99873-3	TRUE	FALSE
E9PKN0;E9PQ01;O94913	TRUE	TRUE
E9PKP8;E9PS00;H0YCN1;H0YED5;Q9Y5Q0	TRUE	TRUE
E9PL17;Q92989;Q92989-2	TRUE	TRUE
E9PLN8;F8W9H0;I3L3B4;Q9BQB6;Q9BQB6-2;Q9BQB6-3	TRUE	TRUE
E9PMB9;Q16798	TRUE	TRUE
E9PMG5	TRUE	FALSE
E9PMI6;J3KN38;P54105	FALSE	TRUE
E9PMJ1;E9PS06;Q15771	TRUE	TRUE
E9PMQ6;Q00613;Q00613-2	TRUE	TRUE
E9PMR4;K4DIA7;P48509	TRUE	TRUE
E9PMS6	TRUE	TRUE
E9PNE5;Q9H1C4	TRUE	TRUE
E9PPF6	TRUE	FALSE
E9PPZ9;O43292;O43292-2	TRUE	FALSE
E9PQC9	TRUE	TRUE
E9PQD7;P15880	TRUE	TRUE
E9PQM8;E9PRF4;Q15047;Q15047-3	FALSE	TRUE
E9PR30;P62861	FALSE	TRUE
E9PR76;E9PSH4;Q9H063	TRUE	TRUE
E9PR92	TRUE	TRUE
E9PRU1;O95967	FALSE	TRUE
E9PS41;Q6RFH5;Q6RFH5-2	FALSE	TRUE
E9PS44;Q01628	TRUE	TRUE
ENSEMBL:ENSBTAP00000001528	TRUE	TRUE
ENSEMBL:ENSBTAP00000007350	TRUE	TRUE
ENSEMBL:ENSBTAP00000024462;ENSEMBL:ENSBTAP00000024466	TRUE	FALSE
ENSEMBL:ENSBTAP00000038329;REFSEQ:XP_001252647	TRUE	FALSE
F2Z2H4;J3KPC0;Q5VVY4;Q86XD8	TRUE	TRUE
F2Z2J1;Q15349;Q15349-2;Q15349-3	FALSE	TRUE
F2Z2W7;Q8IZ69;Q8IZ69-2	FALSE	TRUE
F2Z2X4;Q9C0E2	TRUE	FALSE
F2Z2X9	TRUE	FALSE
F2Z3K0	TRUE	TRUE
F5GWB9;I3L1L5;I3L2B9;I3L4D7;I3L4R7;I3L517;Q8NHS9;Q8NHS9-2;Q8NHS9-3	TRUE	TRUE
F5GWI0;F5H2L3	TRUE	TRUE
F5GWI4;P00813	FALSE	TRUE
F5GX19;F5H3Y3;Q6IAA8	TRUE	TRUE
F5GX26;Q7Z3Z4;Q7Z3Z4-2;Q7Z3Z4-3	TRUE	TRUE
F5GXW5;Q99622	FALSE	TRUE
F5GXX5;P61803	FALSE	TRUE
F5GY80;F5H7G1;P07358	TRUE	FALSE
F5GYQ1;P61421	TRUE	TRUE
F5GYQ6;H7C1B8;H7C499;Q96HL8;Q96HL8-2;Q96HL8-3;Q96HL8-4;S4R3I7	TRUE	TRUE
F5GYQ7	TRUE	TRUE
F5GZ54	FALSE	TRUE
F5GZ97;Q9Y3C0	TRUE	FALSE
F5GZG1	TRUE	TRUE
F5H001;F5H7N8	TRUE	FALSE
F5H116	FALSE	TRUE
F5H157;Q15286	TRUE	TRUE
F5H1S1;Q92521	TRUE	TRUE
F5H265	TRUE	TRUE
F5H369;O75747	TRUE	FALSE
F5H3G9;F5H4N6;Q9Y3R0;Q9Y3R0-2;Q9Y3R0-3	TRUE	TRUE
F5H3Y4;Q8IY37	FALSE	TRUE
F5H4F1;Q99638	TRUE	TRUE
F5H4X9	TRUE	FALSE
F5H523;Q9P2K6	FALSE	TRUE
F5H5A3;Q8IVH8;Q8IVH8-2;Q8IVH8-3	FALSE	TRUE
F5H619;Q86XA9;Q86XA9-2	FALSE	TRUE
F5H6U7;G3V1U5;Q9Y3E0	TRUE	FALSE
F5H6Z0;Q00537;Q00537-2	FALSE	TRUE
F5H760	TRUE	TRUE
F5H7I0;Q8NC69	FALSE	TRUE
F5H7I4;H9ZYI9;Q06547;Q06547-2;Q06547-3;Q06547-4	TRUE	FALSE
F5H7J9;H0YGW5;O75581	TRUE	FALSE
F6SDV2;Q9GZM7;Q9GZM7-3	TRUE	TRUE
F6SFZ6;Q99571;Q99571-2;Q99571-3	TRUE	TRUE
F6VZ39;H0YA61;Q9BX46;Q9H0Z9;Q9H0Z9-2	FALSE	TRUE
F6XA08;Q5VYX0;Q5VYX0-2	FALSE	TRUE
F8VPN1;F8VQE3;F8VRQ9;F8VUB3;F8VWP8;F8VXS2;F8VZI3;F8W0X2;Q9P1Z2;Q9P1Z2-2;Q9P1Z2-3	TRUE	TRUE
F8VQR7;F8VW96;Q16527	TRUE	TRUE
F8VRX1;O95398;O95398-2;O95398-3	TRUE	FALSE
F8VS61	TRUE	TRUE
F8VUC5;F8VVA7;F8VXB1;F8VXR1;F8VYZ4;F8W156;P61923;P61923-4;P61923-5	TRUE	FALSE
F8VUY8;Q96QD8	TRUE	FALSE
F8VV56;F8VWK8;F8W022;P08962;P08962-2;P08962-3	TRUE	TRUE
F8VW50;Q2TAC6;Q2TAC6-2;Q2TAC6-3	FALSE	TRUE
F8VWY2;Q9UBM8;Q9UBM8-2	TRUE	TRUE
F8VWZ8;Q52LW3	TRUE	TRUE
F8VXD5;Q53FV1	FALSE	TRUE
F8VXY6;G3V1V1;Q8TBF4	TRUE	TRUE
F8VZA0;Q9H0K6	TRUE	TRUE
F8W038;Q8IXM2;Q8IXM2-3	TRUE	FALSE
F8W0A2	TRUE	TRUE
F8W0A3	TRUE	TRUE
F8W0U9;Q149M9;Q149M9-3	FALSE	TRUE
F8W1B3	TRUE	FALSE
F8W1C3;Q99542	TRUE	TRUE
F8W6W2	TRUE	TRUE
F8W703;Q9HCK4;Q9HCK4-2;Q9HCK4-3;R4GMM8	FALSE	TRUE
F8W775	TRUE	TRUE
F8W7A7;J3KSU3;Q5BJE1;Q5BJE1-2;Q5BJE1-3;Q5BJE1-4	TRUE	TRUE
F8W7C6	TRUE	FALSE
F8W7Q2	TRUE	FALSE
F8W7T1;Q92784-3	TRUE	TRUE
F8W876;P48740;P48740-2;P48740-3;P48740-4	TRUE	TRUE
F8W9J4;Q03001	TRUE	FALSE
F8W9U4	TRUE	FALSE
F8WBF9;Q5TH30;Q9UGV2;Q9UGV2-2;Q9UGV2-3	TRUE	TRUE
F8WBJ6;Q9NRX1	FALSE	TRUE
F8WBQ5;F8WDJ7;Q03938	TRUE	TRUE
F8WCX2;H0Y5I5;Q8N1G0;Q8N1G0-2	TRUE	TRUE
F8WDE4;Q9NP87;Q9NP87-2	FALSE	TRUE
F8WDT6;H7C2C9	FALSE	TRUE
F8WDW2	TRUE	TRUE
F8WEM8	TRUE	FALSE
G3V1L9;Q07157	TRUE	TRUE
G3V1P3;Q969J3	TRUE	TRUE
G3V1S3;Q6ZUT9;Q6ZUT9-2	TRUE	FALSE
G3V229;G3V412;Q99675	TRUE	FALSE
G3V2A2;G3V3I4;P25963	TRUE	TRUE
G3V2D8;Q68DK2;Q68DK2-2;Q68DK2-5	FALSE	TRUE
G3V2S7	FALSE	TRUE
G3V3A5	TRUE	TRUE
G3V3S1;Q8TBB7;Q96JK2;Q96JK2-2;Q96JK2-3	TRUE	TRUE
G3V4E1;H0YJH4;P23743	TRUE	TRUE
G3V4K3;Q9H9C1;Q9H9C1-2	FALSE	TRUE
G3V4P8;P60983	TRUE	TRUE
G3V583;Q8N128;Q8N128-2	TRUE	TRUE
G3V5P5;Q9UPI3;Q9UPI3-2	TRUE	FALSE
G3V5V3;O60524;O60524-3;O60524-4;O60524-5	FALSE	TRUE
G3XAI2;P07942	FALSE	TRUE
G5E953;Q13615;Q13615-2;Q13615-3	TRUE	TRUE
G5E994;Q5VW38;Q5VW38-2	TRUE	TRUE
G5E9F7;M0R235;P11464;P11464-2;P11464-3;P11464-4	FALSE	TRUE
G5E9G4;Q9ULT0;Q9ULT0-4	TRUE	TRUE
G5E9Y3;Q8WWN8;Q8WWN8-2	FALSE	TRUE
G5EA03;Q9UPQ0-3	FALSE	TRUE
G5EA09;O00560;O00560-2;O00560-3	TRUE	FALSE
G5EA13;O60353;O60353-2	TRUE	FALSE
G8JLB3;Q9Y606;Q9Y606-2	FALSE	TRUE
H-INV:HIT000292931	TRUE	TRUE
H0Y2M6	TRUE	TRUE
H0Y2P0;H0YD13;H0YE40;J3KN83;P16070;P16070-10;P16070-11;P16070-12;P16070-13;P16070-14;P16070-16;P16070-17;P16070-18;P16070-3;P16070-4;P16070-5;P16070-6;P16070-7;P16070-8	FALSE	TRUE
H0Y3C5;J3KPD6;P08631;P08631-2;P08631-3;P08631-4	TRUE	TRUE
H0Y3U6;P51654;P51654-2;P51654-3	FALSE	TRUE
H0Y400	TRUE	FALSE
H0Y473;O75354;O75354-2;O75354-3	TRUE	TRUE
H0Y4R5;Q5SNT2;Q5SNT2-2	TRUE	FALSE
H0Y4U7;Q8IUA7	TRUE	TRUE
H0Y4Z2;Q4VNC1;Q4VNC1-2;Q4VNC1-3	FALSE	TRUE
H0Y5B4;H7BZ11;J3KQN4;P83881	TRUE	TRUE
H0Y5K5;H0Y621;Q9Y282;Q9Y282-3	TRUE	TRUE
H0Y679;H0YE12;Q92733	TRUE	TRUE
H0Y6F9;Q96IZ5;Q96IZ5-2;Q96IZ5-3	TRUE	TRUE
H0Y6I6;Q96ME1;Q96ME1-2;Q96ME1-4	TRUE	TRUE
H0Y6V6;H0YHZ2;Q6UX01;Q6UX01-2;Q6UX01-3;Q6UX01-4;Q8WVP7;Q8WVP7-3	TRUE	TRUE
H0Y6W0;O95985;O95985-2;O95985-3	TRUE	FALSE
H0Y6Z4;Q8TDZ2;Q8TDZ2-2;Q8TDZ2-4	FALSE	TRUE
H0Y742	TRUE	TRUE
H0Y7Y5;Q9H579-2	TRUE	FALSE
H0Y861;H0Y870;Q5SSC2;Q8TDQ4;Q9H0R3	TRUE	TRUE
H0Y8M7;Q6PEW3;Q9P241;Q9P241-2	TRUE	FALSE
H0Y8P0;Q86TI0	TRUE	FALSE
H0Y8P4;Q8TED0;Q8TED0-3	TRUE	FALSE
H0Y920;Q96JK9	TRUE	FALSE
H0Y9C2	TRUE	FALSE
H0Y9C7;P20933	TRUE	TRUE
H0YAA8;Q9H204	FALSE	TRUE
H0YAM0;P16870;P16870-2	FALSE	TRUE
H0YBA0	TRUE	TRUE
H0YBC7;O60238;O60238-2	FALSE	TRUE
H0YBS1;J3KNV5;Q75QN2;Q75QN2-2	TRUE	TRUE
H0YBZ2;P04233;P04233-2	TRUE	FALSE
H0YBZ4;Q15390;Q15390-2	TRUE	TRUE
H0YCM7;Q5JVZ5;Q5JW01;Q96JJ3;Q96JJ3-3	TRUE	TRUE
H0YD18	TRUE	TRUE
H0YD93;Q8WXA3;Q8WXA3-1;Q8WXA3-3;Q8WXA3-4;Q8WXA3-5	TRUE	FALSE
H0YDB2	TRUE	TRUE
H0YDF6	TRUE	TRUE
H0YEA4	TRUE	FALSE
H0YEH2;Q14671;Q14671-2;Q14671-3;Q5T1Z4;Q5T1Z8	TRUE	TRUE
H0YFN7;Q4ADV7;Q4ADV7-2;Q4ADV7-3	TRUE	TRUE
H0YG19	TRUE	FALSE
H0YGG4	TRUE	TRUE
H0YGR4;Q9Y3B8	TRUE	TRUE
H0YHF6;H0YIE9;O94952;O94952-1;Q4G104	TRUE	TRUE
H0YI09;Q9H8H3	FALSE	TRUE
H0YJP9;Q6PIF1;Q86TV6;Q86TV6-2	TRUE	FALSE
H0YK62;O43315	TRUE	TRUE
H0YL22	TRUE	TRUE
H0YLM8;Q8TDJ6;Q8TDJ6-2;Q8TDJ6-3	FALSE	TRUE
H0YLN8;Q96QT4	TRUE	TRUE
H0YM23;O75179;O75179-2;O75179-6;O75179-7	TRUE	TRUE
H0YMD1	TRUE	FALSE
H0YMQ3	TRUE	TRUE
H0YN41	TRUE	TRUE
H0YNA2	TRUE	TRUE
H0YNA7;Q8TCT8	TRUE	FALSE
H0YNF8	TRUE	TRUE
H0YNH5;Q7L8W6	TRUE	TRUE
H0YNL3	FALSE	TRUE
H0YNP5	TRUE	FALSE
H0YNX0	TRUE	TRUE
H3BM06;H7C2U5	TRUE	FALSE
H3BM14;H3BM74;Q9Y5A7;Q9Y5A7-2	TRUE	TRUE
H3BMD2	TRUE	TRUE
H3BN30	TRUE	TRUE
H3BN55;H3BVH7;P51159;P51159-2	FALSE	TRUE
H3BNC9;P08708	FALSE	TRUE
H3BNS8	TRUE	TRUE
H3BNU8;H3BPL4;Q1ED39	FALSE	TRUE
H3BP27;Q9BUB4;Q9BUB4-2	TRUE	FALSE
H3BPC1;H3BQA9;H3BST3;H3BVF2;Q9UBI4;Q9UBI4-3;Q9UBI4-5;Q9UBI4-6	TRUE	FALSE
H3BPF6;Q99471	FALSE	TRUE
H3BPG6	TRUE	TRUE
H3BPJ2;Q15041;Q15041-2	TRUE	TRUE
H3BPU4;Q9UGJ1;Q9UGJ1-2	TRUE	TRUE
H3BPU8;Q92874;Q92874-2	TRUE	FALSE
H3BQ35;Q63HK3;Q63HK3-2	TRUE	TRUE
H3BQU2;Q9NVX0;Q9NVX0-2;Q9NVX0-3;U3KQI5	TRUE	FALSE
H3BR72	FALSE	TRUE
H3BR83;H3BRS1;I3L3K7;Q12968;Q12968-2;Q12968-3;Q12968-4;Q12968-5;Q12968-6	TRUE	FALSE
H3BRA8	FALSE	TRUE
H3BRB6;Q8ND25;Q8ND25-2	FALSE	TRUE
H3BSL2;Q96RK4;Q96RK4-2;Q96RK4-3	FALSE	TRUE
H3BSM9;Q9NSC2;Q9NSC2-2	TRUE	FALSE
H3BST1;Q9UL45	TRUE	TRUE
H3BT42	TRUE	FALSE
H3BT78	FALSE	TRUE
H3BTN8	TRUE	FALSE
H7BXH9;Q8WXB1	TRUE	FALSE
H7BXY3;Q7L2E3;Q7L2E3-2;Q7L2E3-3	FALSE	TRUE
H7BY64	TRUE	FALSE
H7BYN4;Q02241	TRUE	TRUE
H7BYU6;J3KTI4;J3QQI2;Q96K83	TRUE	FALSE
H7BYV6;Q9NQY0;Q9NQY0-2	TRUE	TRUE
H7BZ55	TRUE	TRUE
H7BZ89	FALSE	TRUE
H7BZI0	FALSE	TRUE
H7BZS7	TRUE	FALSE
H7BZU1	FALSE	TRUE
H7BZX8;Q14190;Q14190-2	TRUE	TRUE
H7C033;Q9BQI3;Q9BQI3-2	FALSE	TRUE
H7C096;J3KN59;Q12982;Q12982-2	TRUE	TRUE
H7C0R7	TRUE	FALSE
H7C1E8;Q8WVS4	TRUE	TRUE
H7C1M3;P22894	TRUE	TRUE
H7C1Z9;Q9NWM8	TRUE	FALSE
H7C276;Q9UPR0;Q9UPR0-2;Q9UPR0-3	FALSE	TRUE
H7C2Q8	TRUE	TRUE
H7C2S4;O15194;O15194-2	FALSE	TRUE
H7C3T2;Q2TAZ0;Q2TAZ0-3	TRUE	FALSE
H7C434;Q7Z674;Q9UHY8;Q9UHY8-2	FALSE	TRUE
H7C549	TRUE	FALSE
H7C592;O14829;O14829-2;O14829-3;O14829-5	TRUE	TRUE
H8Y6P7;P0CAP1-11	TRUE	TRUE
I3L0L6;Q9H6Y7	FALSE	TRUE
I3L0N3;P46459	TRUE	FALSE
I3L0W4;Q96F10	FALSE	TRUE
I3L112;P52429	TRUE	TRUE
I3L1D0;I3L4S6;Q5MNZ6	FALSE	TRUE
I3L2C7;P57678	TRUE	FALSE
I3L2S3;Q9ULH7;Q9ULH7-2;Q9ULH7-3;Q9ULH7-4;Q9ULH7-5	TRUE	TRUE
I3L388;Q14526;Q14526-2	TRUE	TRUE
I3L448;Q5TC12;Q5TC12-3	TRUE	TRUE
I3L454;P47871	FALSE	TRUE
I3L4A1;Q96FZ7	TRUE	FALSE
I3L505	TRUE	FALSE
J3KN34;P26045;P26045-2;P26045-3	TRUE	TRUE
J3KNJ3;Q9Y3Q0	TRUE	FALSE
J3KNL2;Q8WYJ6;Q8WYJ6-2	TRUE	TRUE
J3KNN7;Q7Z569	FALSE	TRUE
J3KNR0;P27448;P27448-2;P27448-3;P27448-4;P27448-6;P27448-7;P27448-8	TRUE	FALSE
J3KNV4;Q13683;Q13683-3;Q13683-7;Q13683-9	FALSE	TRUE
J3KPP0;Q9Y6G3;S4R2Z7;S4R360	TRUE	TRUE
J3KQL8	TRUE	FALSE
J3KQR7;Q9Y4F5;Q9Y4F5-2;Q9Y4F5-3	TRUE	FALSE
J3KR51;J3KR62	TRUE	TRUE
J3KRA9;Q96Q15;Q96Q15-2;Q96Q15-3	TRUE	TRUE
J3KRK0;J3QLK5;Q86UE8;Q86UE8-2;Q86UE8-3;Q9UKI8;Q9UKI8-2;Q9UKI8-3;Q9UKI8-4;Q9UKI8-5	TRUE	TRUE
J3KRN4;J3QRB6;Q99759;Q99759-2	TRUE	TRUE
J3KRP0;Q96KN2	TRUE	FALSE
J3KRR7;Q9NQC7;Q9NQC7-2	TRUE	TRUE
J3KRY7;Q9BTX3	TRUE	TRUE
J3KS94;J3QQK6;P02686;P02686-2	FALSE	TRUE
J3KSS5;Q6QEF8	TRUE	TRUE
J3KSS7;Q9NZ52;Q9NZ52-4	TRUE	TRUE
J3KSY7;O15234	TRUE	TRUE
J3KSZ8;J3KTC2;J3QQY0;Q68DK7;Q68DK7-2;Q68DK7-3	FALSE	TRUE
J3KT35;Q969W3;Q969W3-2	TRUE	FALSE
J3KTA1;Q96IG2;Q96IG2-2	TRUE	TRUE
J3KTD4;Q96CN5	FALSE	TRUE
J3KTN6;J3QLV8;J3QRB9;Q9Y5W9;Q9Y5W9-2	TRUE	TRUE
J3QKX5;Q16820	TRUE	TRUE
J3QLB2;Q8N1S5;Q8N1S5-2	TRUE	FALSE
J3QLK7;Q9BZF2;Q9BZF2-2	TRUE	FALSE
J3QLP1	TRUE	TRUE
J3QLU9;P04626;P04626-4;P04626-5	TRUE	TRUE
J3QLV9;O95190	TRUE	TRUE
J3QQJ0;Q9UHR5;Q9UHR5-2	TRUE	TRUE
J3QQL2;P16144;P16144-2;P16144-3;P16144-4;P16144-5	TRUE	TRUE
J3QQM4;Q9HAU4	TRUE	TRUE
J3QQM5;Q9BT23	TRUE	FALSE
J3QQN0	FALSE	TRUE
J3QQZ8	TRUE	FALSE
J3QRP2;Q8IZR5;Q8IZR5-2;Q8IZR5-3	TRUE	FALSE
J3QSG8	TRUE	TRUE
J3QSS3;Q9BZC7;Q9BZC7-2;Q9BZC7-3	TRUE	TRUE
J3QT73	TRUE	TRUE
K7EIG7;O94832	TRUE	TRUE
K7EIJ1;Q9H777	TRUE	TRUE
K7EIN2;Q9BRJ7	TRUE	FALSE
K7EIP7;K7ENM8;K7ERW0;Q9BWQ6	FALSE	TRUE
K7EIU8;Q13485	FALSE	TRUE
K7EIY1;Q9Y421;Q9Y421-3	FALSE	TRUE
K7EIY4;O60499;Q5U8S2;X6R2W0	FALSE	TRUE
K7EJ20;K7EKX7;K7ENB4;R4GNE4	TRUE	TRUE
K7EJP8;K7EKT4;O15090	TRUE	TRUE
K7EK07;P84243	TRUE	TRUE
K7EKF6;Q8NI99	TRUE	TRUE
K7EL76;Q6P597;Q6P597-2	TRUE	FALSE
K7ELC2;P62841	TRUE	FALSE
K7ELM9;K7EPF9	TRUE	TRUE
K7EMN8;K7EQV0;P59045;P59045-2;P59045-3	TRUE	FALSE
K7EMY4;Q96GY3	TRUE	FALSE
K7EN84	TRUE	TRUE
K7ENY0;Q96FH0	TRUE	TRUE
K7EPI4	TRUE	TRUE
K7EPL7	TRUE	TRUE
K7EPP0;Q96C10	TRUE	TRUE
K7EPS8;Q9NSK7;Q9NSK7-3;Q9NSK7-4	TRUE	FALSE
K7EQ86;Q08E86;Q14667	TRUE	TRUE
K7EQG4;O00168	TRUE	FALSE
K7EQL6;Q8NFA0	FALSE	TRUE
K7EQM1;Q8N6D5;Q8N6D5-3	FALSE	TRUE
K7ERU9;Q2NL98	TRUE	TRUE
K7ES59	TRUE	TRUE
L0R819	TRUE	FALSE
M0QX44;M0QXM4;Q15758;Q15758-2;Q15758-3	TRUE	TRUE
M0QXC5;O96009	TRUE	FALSE
M0QXG8;Q92990	TRUE	TRUE
M0QXZ3	FALSE	TRUE
M0QXZ8;Q6ZW31;Q6ZW31-2	TRUE	FALSE
M0QYI9;Q96EN9;Q96EN9-2;Q96EN9-3	TRUE	FALSE
M0QYT9;Q14653	FALSE	TRUE
M0QYV0	TRUE	FALSE
M0QYV6;Q6ZN19-3	TRUE	TRUE
M0QZH0;Q96D15	TRUE	TRUE
M0QZR4;Q92888;Q92888-2;Q92888-3	FALSE	TRUE
M0QZV4;Q96N58	TRUE	TRUE
M0R063;P48664;P48664-2	TRUE	TRUE
O00115;O00115-2	TRUE	FALSE
O00159-3	TRUE	FALSE
O00160	TRUE	FALSE
O00186	TRUE	FALSE
O00187	TRUE	TRUE
O00204;O00204-2	FALSE	TRUE
O00214;O00214-2	TRUE	FALSE
O00221;Q7LC14	FALSE	TRUE
O00291;O00291-3;O00291-4	TRUE	FALSE
O00308;O00308-2	TRUE	TRUE
O00370	FALSE	TRUE
O00418	FALSE	TRUE
O00468;O00468-3;O00468-4;O00468-5;O00468-6;O00468-7	TRUE	TRUE
O00478;O00478-2	TRUE	TRUE
O00515	TRUE	TRUE
O00562;O00562-2	TRUE	TRUE
O00628;O00628-2	FALSE	TRUE
O00629	TRUE	FALSE
O00635	FALSE	TRUE
O00754;O00754-2	TRUE	TRUE
O14523;O14523-2	TRUE	TRUE
O14530;O14530-2	TRUE	FALSE
O14578;O14578-2;O14578-4	TRUE	FALSE
O14579	TRUE	FALSE
O14639-2;O14639-6	TRUE	TRUE
O14656	TRUE	TRUE
O14686;O14686-3	TRUE	TRUE
O14763;O14763-2	FALSE	TRUE
O14787	TRUE	TRUE
O14950	FALSE	TRUE
O14960	TRUE	TRUE
O14966	TRUE	TRUE
O14972	TRUE	FALSE
O15047	TRUE	TRUE
O15056;O15056-2	TRUE	TRUE
O15063	TRUE	TRUE
O15084;O15084-1;O15084-4	TRUE	FALSE
O15085;O15085-2	TRUE	FALSE
O15111	TRUE	FALSE
O15116	FALSE	TRUE
O15118	TRUE	TRUE
O15127	FALSE	TRUE
O15169	TRUE	TRUE
O15230	FALSE	TRUE
O15245	TRUE	FALSE
O15294	FALSE	TRUE
O15381;O15381-2;O15381-3;O15381-5	TRUE	FALSE
O15400;O15400-2	TRUE	TRUE
O15431	TRUE	TRUE
O15438;O15438-4	FALSE	TRUE
O15446;O15446-2	TRUE	FALSE
O15455	TRUE	TRUE
O15514	TRUE	FALSE
O43143	TRUE	FALSE
O43149	FALSE	TRUE
O43156	TRUE	TRUE
O43157	TRUE	TRUE
O43164;O43164-2	TRUE	TRUE
O43169	TRUE	FALSE
O43294;O43294-2	TRUE	TRUE
O43310;O43310-2	TRUE	TRUE
O43312-2	FALSE	TRUE
O43422;O43422-2	TRUE	TRUE
O43427;O43427-2	TRUE	TRUE
O43581;O43581-2;O43581-3;O43581-4;O43581-5;O43581-6	TRUE	TRUE
O43752	TRUE	TRUE
O43795-2	TRUE	TRUE
O43829	TRUE	TRUE
O43861;O43861-2	TRUE	FALSE
O43895	TRUE	FALSE
O43903	TRUE	FALSE
O43929;O43929-2;O43929-3;Q2YDI2	FALSE	TRUE
O60243	TRUE	TRUE
O60256-4	TRUE	TRUE
O60291;O60291-2	TRUE	TRUE
O60293	TRUE	TRUE
O60341;O60341-2;R4GMQ1	TRUE	TRUE
O60361	FALSE	TRUE
O60437	TRUE	TRUE
O60447;O60447-2	TRUE	FALSE
O60488;O60488-2	TRUE	TRUE
O60500;O60500-2	TRUE	FALSE
O60503	TRUE	FALSE
O60506;O60506-2	TRUE	TRUE
O60507	TRUE	TRUE
O60512	TRUE	FALSE
O60563	TRUE	FALSE
O60658;O60658-2;O60658-6	FALSE	TRUE
O60669	TRUE	FALSE
O60678	TRUE	FALSE
O60706;O60706-2	TRUE	TRUE
O60721;O60721-3	TRUE	TRUE
O60783	TRUE	TRUE
O60810	TRUE	TRUE
O60826	TRUE	FALSE
O60869;O60869-2;O60869-3	FALSE	TRUE
O60880-3	TRUE	TRUE
O60888;O60888-2;O60888-3	TRUE	TRUE
O60911	TRUE	TRUE
O60921;O60921-2	TRUE	FALSE
O60927	TRUE	TRUE
O60934	FALSE	TRUE
O60941-7	TRUE	TRUE
O60942;O60942-2;O60942-3;O60942-4	TRUE	TRUE
O75052;O75052-3	TRUE	TRUE
O75096	TRUE	FALSE
O75110	TRUE	TRUE
O75128;O75128-2	TRUE	TRUE
O75132	TRUE	TRUE
O75317	FALSE	TRUE
O75323	TRUE	TRUE
O75340;O75340-2	TRUE	TRUE
O75366;O75366-2	TRUE	FALSE
O75376;O75376-2	FALSE	TRUE
O75379;O75379-2	TRUE	TRUE
O75381;O75381-2	TRUE	FALSE
O75420	FALSE	TRUE
O75427	TRUE	TRUE
O75467;Q96I98	TRUE	FALSE
O75473;O75473-2;O75473-3	TRUE	TRUE
O75570	TRUE	TRUE
O75604	TRUE	TRUE
O75751	TRUE	TRUE
O75791;O75791-2	TRUE	TRUE
O75815-3	TRUE	FALSE
O75832	TRUE	TRUE
O75881	TRUE	FALSE
O75882	TRUE	TRUE
O75909;O75909-4	TRUE	TRUE
O75923;O75923-10;O75923-11;O75923-12;O75923-13;O75923-14;O75923-2;O75923-3;O75923-4;O75923-5;O75923-6;O75923-7;O75923-8;O75923-9	TRUE	TRUE
O75955	TRUE	FALSE
O75962-2	TRUE	TRUE
O75969	TRUE	TRUE
O75976	TRUE	FALSE
O76027	TRUE	TRUE
O94763	TRUE	TRUE
O94811	TRUE	TRUE
O94830	TRUE	TRUE
O94875-11	TRUE	TRUE
O94875-12	TRUE	FALSE
O94875-2	FALSE	TRUE
O94885	TRUE	TRUE
O94886	TRUE	TRUE
O94887	TRUE	FALSE
O94915	FALSE	TRUE
O94919	TRUE	FALSE
O94973;O94973-2	TRUE	FALSE
O94992	TRUE	TRUE
O95197;O95197-2;O95197-3;O95197-4;O95197-7	FALSE	TRUE
O95205;Q5VZF2;Q5VZF2-2;Q5VZF2-3	TRUE	TRUE
O95218;O95218-2	TRUE	FALSE
O95219	TRUE	FALSE
O95248;O95248-4;O95248-5	TRUE	FALSE
O95255	TRUE	FALSE
O95294;O95294-2;O95294-3;O95294-4	FALSE	TRUE
O95299-2	FALSE	TRUE
O95342	TRUE	FALSE
O95382	TRUE	TRUE
O95391	FALSE	TRUE
O95415;O95415-2	FALSE	TRUE
O95425-2;O95425-3	FALSE	TRUE
O95436;O95436-2	TRUE	FALSE
O95445;O95445-2;Q5SRP5	TRUE	FALSE
O95477	TRUE	TRUE
O95522	TRUE	TRUE
O95562;Q5TIH2	TRUE	FALSE
O95613	TRUE	TRUE
O95628;O95628-10;O95628-2;O95628-3;O95628-4;O95628-6;O95628-7;O95628-8;O95628-9	FALSE	TRUE
O95716	TRUE	TRUE
O95758;O95758-1;O95758-4;O95758-5;O95758-6	TRUE	TRUE
O95777	TRUE	TRUE
O95782;O95782-2	TRUE	TRUE
O95810	TRUE	FALSE
O95816	TRUE	FALSE
O95835	TRUE	FALSE
O95864	TRUE	TRUE
O95873	TRUE	TRUE
O95905;O95905-2;O95905-3	TRUE	TRUE
O96017-12	TRUE	TRUE
P00374;P00374-2	TRUE	TRUE
P00451	FALSE	TRUE
P00533	FALSE	TRUE
P01042	TRUE	FALSE
P01112	TRUE	TRUE
P01782;P0DP04	TRUE	TRUE
P01833	TRUE	TRUE
P01911	FALSE	TRUE
P02100	TRUE	TRUE
P02458;P02458-1	TRUE	TRUE
P02533;P02533	TRUE	FALSE
P02535-1	TRUE	TRUE
P02549;P02549-2	TRUE	FALSE
P02750	FALSE	TRUE
P02751-1;P02751-3	FALSE	TRUE
P02760	TRUE	FALSE
P02763	TRUE	FALSE
P02790	TRUE	FALSE
P02795;P13640;P13640-2;P80297	TRUE	TRUE
P03891	TRUE	TRUE
P03928	TRUE	TRUE
P03956	TRUE	FALSE
P04035;P04035-2;P04035-3	TRUE	FALSE
P04180	TRUE	FALSE
P04264;P04264	TRUE	TRUE
P04275	FALSE	TRUE
P04278-2	TRUE	TRUE
P04732;P67983	TRUE	TRUE
P04746	TRUE	TRUE
P04899	TRUE	TRUE
P05023;P05023-4	TRUE	FALSE
P05067-2	TRUE	FALSE
P05164-2	FALSE	TRUE
P05387	TRUE	TRUE
P05413;S4R371	FALSE	TRUE
P05546	FALSE	TRUE
P05783	TRUE	FALSE
P05787;P05787;P05787-2	TRUE	TRUE
P05997	TRUE	FALSE
P06213;P06213-2	TRUE	FALSE
P06703;R4GN98	TRUE	FALSE
P06732	TRUE	TRUE
P06733-2	TRUE	FALSE
P06756;P06756-2;P06756-3	FALSE	TRUE
P06858	TRUE	TRUE
P07108-2	TRUE	TRUE
P07306	TRUE	TRUE
P07332;P07332-3	TRUE	TRUE
P07357	TRUE	TRUE
P07686	FALSE	TRUE
P07738	FALSE	TRUE
P07858	TRUE	TRUE
P07919	TRUE	TRUE
P07948;P07948-2	TRUE	TRUE
P07951-3	TRUE	TRUE
P07992;P07992-2;P07992-4	FALSE	TRUE
P08034	FALSE	TRUE
P08183;P08183-2	TRUE	TRUE
P08185	FALSE	TRUE
P08236	TRUE	TRUE
P08240	TRUE	TRUE
P08572	FALSE	TRUE
P08590	FALSE	TRUE
P08648	TRUE	FALSE
P08697	FALSE	TRUE
P08754	FALSE	TRUE
P09382	TRUE	TRUE
P09417-2	FALSE	TRUE
P09496-2	TRUE	FALSE
P09497-2	TRUE	FALSE
P09871	TRUE	FALSE
P09923	FALSE	TRUE
P09958	TRUE	FALSE
P0C0L4	TRUE	TRUE
P0C263	TRUE	TRUE
P0C7T5	TRUE	TRUE
P0C7U0	FALSE	TRUE
P0CG22	TRUE	TRUE
P0CG38	FALSE	TRUE
P0CL83;P0CL84;P0CL84-2	TRUE	TRUE
P0DJ93	TRUE	TRUE
P0DN81	FALSE	TRUE
P0DPD7;P0DPD8	TRUE	TRUE
P10073	TRUE	FALSE
P10114	TRUE	TRUE
P10253	TRUE	TRUE
P10301	TRUE	TRUE
P10619;P10619-2;X6R5C5;X6R8A1	FALSE	TRUE
P10646	TRUE	FALSE
P10909-3	TRUE	TRUE
P10909;P10909-2;P10909-4;P10909-5;P10909-6	TRUE	TRUE
P11055	FALSE	TRUE
P11150	FALSE	TRUE
P11168	TRUE	FALSE
P11215;P11215-2	TRUE	TRUE
P11217	TRUE	TRUE
P11274;P11274-2	TRUE	TRUE
P11277;P11277-2;P11277-3	TRUE	TRUE
P11279	TRUE	TRUE
P11387	TRUE	TRUE
P11532-5;P11532-8	TRUE	FALSE
P11717	FALSE	TRUE
P11908;P11908-2	FALSE	TRUE
P12763	TRUE	TRUE
P13284	TRUE	TRUE
P13473	TRUE	TRUE
P13535	TRUE	FALSE
P13611;P13611-2	TRUE	FALSE
P13645;P13645	TRUE	TRUE
P13647;P13647	TRUE	TRUE
P13717	TRUE	TRUE
P14209	TRUE	TRUE
P14543	FALSE	TRUE
P14672	FALSE	TRUE
P14770	FALSE	TRUE
P15529-2;P15529-3;P15529-4;P15529-5;P15529-6;P15529-7	TRUE	FALSE
P15812-13	TRUE	TRUE
P15848	TRUE	FALSE
P15924	FALSE	TRUE
P16157-21	TRUE	TRUE
P16278;P16278-3	TRUE	TRUE
P16989-2	TRUE	FALSE
P17028	FALSE	TRUE
P17050	TRUE	TRUE
P17900	TRUE	TRUE
P17987	TRUE	TRUE
P18065	TRUE	TRUE
P18085	FALSE	TRUE
P18433;P18433-6	FALSE	TRUE
P18859;P18859-2	TRUE	TRUE
P19022	FALSE	TRUE
P19652	TRUE	TRUE
P20020;P20020-1;P20020-4;P20020-6	FALSE	TRUE
P20340	TRUE	FALSE
P20340-2	TRUE	FALSE
P20742;P20742-2	TRUE	TRUE
P20908;P20908-2	TRUE	FALSE
P21359;P21359-2;P21359-6	FALSE	TRUE
P21439;P21439-2;P21439-3	TRUE	FALSE
P21589	TRUE	FALSE
P21709	TRUE	TRUE
P21817;P21817-2;P21817-3	TRUE	TRUE
P21860;P21860-4	FALSE	TRUE
P21964	TRUE	TRUE
P22307-2	TRUE	TRUE
P22413	TRUE	FALSE
P22670	TRUE	FALSE
P22735	TRUE	FALSE
P22897	FALSE	TRUE
P23229-2;P23229-4;P23229-6;P23229-9	FALSE	TRUE
P23258	TRUE	TRUE
P23297;Q5T7Y4;Q5T7Y5	TRUE	FALSE
P23458	TRUE	FALSE
P23634;P23634-6;P23634-7;P23634-8	TRUE	TRUE
P23677	TRUE	TRUE
P24386	TRUE	TRUE
P25054;P25054-3	FALSE	TRUE
P25103	TRUE	TRUE
P25205;P25205-2	TRUE	FALSE
P25311	TRUE	TRUE
P25325	TRUE	TRUE
P25391	FALSE	TRUE
P25398	TRUE	FALSE
P25685	TRUE	TRUE
P25774;P25774-2	TRUE	TRUE
P26006;P26006-1	FALSE	TRUE
P26358;P26358-2;P26358-3	FALSE	TRUE
P27037;P27037-2	TRUE	TRUE
P27216-2	TRUE	FALSE
P27487	TRUE	TRUE
P27701;P27701-2	FALSE	TRUE
P27815-5	TRUE	FALSE
P27930	TRUE	TRUE
P28289	TRUE	FALSE
P28799	TRUE	TRUE
P29083	FALSE	TRUE
P29322	TRUE	FALSE
P29966	TRUE	TRUE
P29973;P29973-2	TRUE	FALSE
P29992	TRUE	TRUE
P30044;P30044-2	TRUE	FALSE
P31323	TRUE	TRUE
P31431;P31431-2	TRUE	FALSE
P31944	TRUE	FALSE
P31947;P31947-2	FALSE	TRUE
P32456	FALSE	TRUE
P32856;P32856-2;P32856-3	FALSE	TRUE
P32926	TRUE	TRUE
P32927-2	TRUE	FALSE
P33121-3	FALSE	TRUE
P33402;P33402-2;P33402-3	TRUE	TRUE
P33992	FALSE	TRUE
P33993	TRUE	FALSE
P34059	TRUE	TRUE
P35052	FALSE	TRUE
P35221;P35221-2	TRUE	FALSE
P35269	TRUE	TRUE
P35475;P35475-2	TRUE	TRUE
P35527;P35527	TRUE	FALSE
P35568	TRUE	FALSE
P35580;P35580-3	FALSE	TRUE
P35590	TRUE	FALSE
P35606	TRUE	TRUE
P35749;P35749-2;P35749-3;P35749-4	TRUE	FALSE
P36021	TRUE	FALSE
P36404	TRUE	TRUE
P36406;P36406-2;P36406-3	TRUE	TRUE
P36578	TRUE	FALSE
P36955	TRUE	FALSE
P37108	FALSE	TRUE
P39019	FALSE	TRUE
P40227	TRUE	TRUE
P40337;P40337-2;P40337-3	TRUE	TRUE
P40937;P40937-2	FALSE	TRUE
P41594;P41594-2;P41594-3	FALSE	TRUE
P42338	FALSE	TRUE
P42356	TRUE	TRUE
P42677	TRUE	TRUE
P42680	TRUE	FALSE
P42766	FALSE	TRUE
P42785;P42785-2	TRUE	FALSE
P42858	FALSE	TRUE
P43007	FALSE	TRUE
P43405;P43405-2	TRUE	TRUE
P45877	FALSE	TRUE
P45973	TRUE	TRUE
P46060	FALSE	TRUE
P46100;P46100-2;P46100-3;P46100-4;P46100-5	FALSE	TRUE
P46778	TRUE	TRUE
P47712	TRUE	FALSE
P47895	FALSE	TRUE
P48065	TRUE	TRUE
P48382;P48382-2	TRUE	TRUE
P48449	TRUE	FALSE
P49247	FALSE	TRUE
P49336;P49336-2	TRUE	TRUE
P49368	TRUE	FALSE
P49674	TRUE	FALSE
P49736	TRUE	TRUE
P49754;P49754-3	TRUE	TRUE
P49761;P49761-1;P49761-3	TRUE	TRUE
P49770	FALSE	TRUE
P49789	TRUE	TRUE
P50053	TRUE	FALSE
P50148	TRUE	FALSE
P50281	TRUE	FALSE
P50416	TRUE	FALSE
P50440-2	TRUE	TRUE
P50548;P50548-2	TRUE	FALSE
P50552	FALSE	TRUE
P50570-3	FALSE	TRUE
P50579	FALSE	TRUE
P50591	FALSE	TRUE
P50750;P50750-2	FALSE	TRUE
P50895	TRUE	FALSE
P50990	TRUE	FALSE
P50991	TRUE	TRUE
P50993	TRUE	TRUE
P51116	FALSE	TRUE
P51148;P51148-2	FALSE	TRUE
P51178;P51178-2	TRUE	FALSE
P51397	TRUE	TRUE
P51511	TRUE	TRUE
P51809;P51809-3	TRUE	TRUE
P51841	TRUE	TRUE
P51911	FALSE	TRUE
P52179;P52179-2	TRUE	TRUE
P52292	FALSE	TRUE
P52564;P52564-2	TRUE	TRUE
P52597	FALSE	TRUE
P52736;P52736-2;P52736-5;Q5JXV9;Q5JXW0;Q5JXW1	TRUE	TRUE
P52742;P52742-2;Q8N9M3	TRUE	TRUE
P52790	FALSE	TRUE
P53355;P53355-3;P53355-4	FALSE	TRUE
P53367-2	FALSE	TRUE
P53634	TRUE	TRUE
P53708	TRUE	TRUE
P54289;P54289-2;P54289-3;P54289-4;P54289-5	TRUE	FALSE
P54619;P54619-2	TRUE	TRUE
P54646	TRUE	FALSE
P54652	TRUE	FALSE
P54710	FALSE	TRUE
P54760;Q96L35	TRUE	FALSE
P54920	TRUE	FALSE
P55268	FALSE	TRUE
P55289;P55289-2	TRUE	TRUE
P55290;P55290-4;P55290-5	TRUE	TRUE
P55327;P55327-2;P55327-3;P55327-4;P55327-5;P55327-6;P55327-7	TRUE	TRUE
P55899	FALSE	TRUE
P56199	TRUE	FALSE
P56277	TRUE	TRUE
P56545-2	TRUE	TRUE
P56730	TRUE	TRUE
P56937;P56937-3	TRUE	TRUE
P56962	TRUE	FALSE
P58004	TRUE	TRUE
P58335;P58335-2;P58335-4	TRUE	FALSE
P60022	TRUE	TRUE
P60059	TRUE	FALSE
P60468	TRUE	FALSE
P60866;P60866-2	TRUE	TRUE
P60903	TRUE	TRUE
P61006	TRUE	FALSE
P61019	TRUE	FALSE
P61086-2	TRUE	TRUE
P61158	TRUE	FALSE
P61160	TRUE	FALSE
P61224	TRUE	FALSE
P61225	TRUE	TRUE
P61289;P61289-2;P61289-3	TRUE	TRUE
P61587	TRUE	TRUE
P61952	TRUE	FALSE
P61962	TRUE	FALSE
P62081	FALSE	TRUE
P62241;Q5JR95	TRUE	TRUE
P62244	TRUE	TRUE
P62249	TRUE	FALSE
P62310	TRUE	TRUE
P62633;P62633-2;P62633-3;P62633-4;P62633-5;P62633-6;P62633-7;P62633-8	TRUE	TRUE
P62736	FALSE	TRUE
P62753	TRUE	TRUE
P62820	TRUE	FALSE
P62820-2	TRUE	TRUE
P62834	TRUE	FALSE
P62851	FALSE	TRUE
P62879	TRUE	TRUE
P62888	TRUE	TRUE
P63010;P63010-2	TRUE	TRUE
P63165	TRUE	TRUE
P63244	FALSE	TRUE
P63272	TRUE	TRUE
P67936	TRUE	TRUE
P68431	TRUE	FALSE
P68871	TRUE	FALSE
P69905	TRUE	TRUE
P78310;P78310-2;P78310-6	TRUE	FALSE
P78346;P78346-2	FALSE	TRUE
P78371	TRUE	TRUE
P78536	FALSE	TRUE
P78537;P78537-2	TRUE	TRUE
P80303;P80303-2	TRUE	TRUE
P80723;P80723-2;U3KQP0	TRUE	FALSE
P83436	FALSE	TRUE
P83876	TRUE	FALSE
P84095	TRUE	TRUE
P84101;P84101-4	TRUE	TRUE
P84103;P84103-2	TRUE	FALSE
P85037	TRUE	TRUE
P85299;P85299-2;P85299-3;P85299-4;P85299-5	TRUE	TRUE
P98077	TRUE	FALSE
P98160	TRUE	TRUE
P98164	TRUE	FALSE
P98172	TRUE	FALSE
P98179	FALSE	TRUE
P98198-4	TRUE	FALSE
Q00403	TRUE	TRUE
Q00688	FALSE	TRUE
Q00765	TRUE	FALSE
Q00973;Q00973-2	FALSE	TRUE
Q00G26	TRUE	FALSE
Q01518	TRUE	FALSE
Q01581	TRUE	FALSE
Q01658	TRUE	TRUE
Q01814;Q01814-8	FALSE	TRUE
Q01831;Q01831-2	FALSE	TRUE
Q02156	TRUE	FALSE
Q02413;Q02413-2	FALSE	TRUE
Q02543	FALSE	TRUE
Q02779	TRUE	TRUE
Q02809;Q02809-2	TRUE	TRUE
Q02818	FALSE	TRUE
Q02952;Q02952-2;Q02952-3	TRUE	TRUE
Q03164;Q03164-2;Q03164-3	TRUE	TRUE
Q03169	FALSE	TRUE
Q03393	FALSE	TRUE
Q04695;Q04695	FALSE	TRUE
Q04721	TRUE	FALSE
Q05513	FALSE	TRUE
Q05823	TRUE	TRUE
Q07001;Q07001-2	TRUE	TRUE
Q07075	TRUE	FALSE
Q07283	TRUE	TRUE
Q07817;Q07817-3;Q5QP56;Q5TE64;Q9H1R6	TRUE	TRUE
Q07912	TRUE	TRUE
Q08043	TRUE	TRUE
Q08357	TRUE	TRUE
Q08378	TRUE	FALSE
Q08380	TRUE	FALSE
Q08477-2	TRUE	TRUE
Q0IIK2;Q29443	TRUE	TRUE
Q0P6H9	TRUE	FALSE
Q0V8M9	TRUE	TRUE
Q0VDD8-4	TRUE	TRUE
Q0VFZ6	TRUE	TRUE
Q10567-3	TRUE	FALSE
Q10589	FALSE	TRUE
Q11201	TRUE	TRUE
Q12794;Q12794-2;Q12794-4;Q12794-7	TRUE	TRUE
Q12802;Q12802-2;Q12802-4	FALSE	TRUE
Q12907	TRUE	FALSE
Q12908	FALSE	TRUE
Q12933;Q12933-3;Q12933-4	FALSE	TRUE
Q12955	TRUE	FALSE
Q12965	TRUE	TRUE
Q13007;Q13007-2	FALSE	TRUE
Q13043	TRUE	TRUE
Q13136;Q13136-2	TRUE	FALSE
Q13137;Q13137-3;Q13137-4;Q13137-5	FALSE	TRUE
Q13153	FALSE	TRUE
Q13164;Q13164-3	FALSE	TRUE
Q13188;Q13188-2	TRUE	TRUE
Q13190	TRUE	FALSE
Q13243-3	TRUE	TRUE
Q13257;Q13257-2	FALSE	TRUE
Q13263	TRUE	FALSE
Q13308;Q13308-2;Q13308-4;Q13308-5;Q13308-6	FALSE	TRUE
Q13416	TRUE	FALSE
Q13425	FALSE	TRUE
Q13445	TRUE	TRUE
Q13470;Q13470-2	TRUE	TRUE
Q13472;Q13472-2;Q13472-3	TRUE	FALSE
Q13488	TRUE	FALSE
Q13619	TRUE	FALSE
Q13625;Q13625-2;Q13625-3	TRUE	TRUE
Q13642-1;Q13642-4;Q13642-5;Q5JXI8	FALSE	TRUE
Q13740;Q13740-2	FALSE	TRUE
Q13905;Q13905-2;Q13905-3;Q13905-4	TRUE	TRUE
Q14005;Q14005-2;Q14005-3	TRUE	TRUE
Q14008;Q14008-2	TRUE	FALSE
Q14011	TRUE	FALSE
Q14112;Q14112-2	FALSE	TRUE
Q14116;Q14116-2	TRUE	TRUE
Q14126	TRUE	TRUE
Q14137	TRUE	TRUE
Q14142	TRUE	TRUE
Q14164;Q14164-2	TRUE	TRUE
Q14289;Q14289-2	TRUE	TRUE
Q14320	TRUE	FALSE
Q14330;Q5JUH9	TRUE	FALSE
Q14331	TRUE	TRUE
Q14344	TRUE	TRUE
Q14397	FALSE	TRUE
Q14444;Q14444-2	TRUE	TRUE
Q14457	TRUE	TRUE
Q14520;Q14520-2	FALSE	TRUE
Q14566	TRUE	TRUE
Q14573	TRUE	TRUE
Q14642;Q5T1B5	TRUE	FALSE
Q14676;Q14676-2;Q14676-3	TRUE	TRUE
Q14693;Q14693-2;Q14693-3;Q14693-4;Q14693-5;Q14693-7	TRUE	FALSE
Q14699	TRUE	FALSE
Q14746;Q14746-2	TRUE	TRUE
Q14764	FALSE	TRUE
Q14789;Q14789-2	TRUE	TRUE
Q147U7	TRUE	TRUE
Q14865	FALSE	TRUE
Q14872	TRUE	FALSE
Q14896-2	TRUE	TRUE
Q14CX7;Q14CX7-2	TRUE	TRUE
Q15019;Q15019-2;Q15019-3	FALSE	TRUE
Q15052;Q15052-2	FALSE	TRUE
Q15149-3	TRUE	TRUE
Q15149-8	TRUE	TRUE
Q15223	FALSE	TRUE
Q15291;Q15291-2	TRUE	TRUE
Q15363	TRUE	TRUE
Q15375;Q15375-4	FALSE	TRUE
Q15388	TRUE	TRUE
Q15464;Q15464-2	TRUE	TRUE
Q15477	TRUE	TRUE
Q15545	TRUE	FALSE
Q15555-5	FALSE	TRUE
Q15562;Q15562-2;Q15562-3;Q15562-4	FALSE	TRUE
Q15633;Q15633-2	TRUE	FALSE
Q15642;Q15642-2;Q15642-3;Q15642-4;W4VSQ9	TRUE	TRUE
Q15646	FALSE	TRUE
Q15654	FALSE	TRUE
Q15742;Q15742-2;Q15742-3	TRUE	TRUE
Q15772;Q15772-1	TRUE	FALSE
Q15773	TRUE	FALSE
Q15796;Q15796-2	TRUE	FALSE
Q15797;Q99717	TRUE	TRUE
Q15836	TRUE	TRUE
Q15842	FALSE	TRUE
Q15904	TRUE	FALSE
Q16515;Q16515-2	FALSE	TRUE
Q16549;Q6PK65	FALSE	TRUE
Q16576	FALSE	TRUE
Q16589	TRUE	TRUE
Q16600	TRUE	TRUE
Q16625-7	TRUE	TRUE
Q16643;Q16643-3	TRUE	TRUE
Q16772	TRUE	TRUE
Q16828	TRUE	TRUE
Q16853;Q16853-2	FALSE	TRUE
Q16864;Q16864-2	TRUE	TRUE
Q16877;Q16877-2;Q16877-3;Q66S35	TRUE	FALSE
Q17RC7	TRUE	TRUE
Q17RL8;Q76G19;V9GYN6	TRUE	TRUE
Q17RN3	TRUE	FALSE
Q1X8D7;Q1X8D7-2;Q1X8D7-3	TRUE	TRUE
Q28194	TRUE	FALSE
Q2HJF0	FALSE	TRUE
Q2KHT3;Q2KHT3-2	TRUE	TRUE
Q2KIG3	TRUE	FALSE
Q2KJ83	TRUE	TRUE
Q2LD37;Q2LD37-4	TRUE	TRUE
Q2M2H8	TRUE	TRUE
Q2M2I5;Q2M2I5	TRUE	TRUE
Q2M385	FALSE	TRUE
Q2M3G4;Q2M3G4-2	TRUE	TRUE
Q2Q1W2	TRUE	TRUE
Q2TAA5	TRUE	TRUE
Q2UVX4	TRUE	TRUE
Q2VPB7	TRUE	FALSE
Q2WGJ6	TRUE	TRUE
Q38SD2	TRUE	TRUE
Q3B726	TRUE	TRUE
Q3KP22-3	TRUE	TRUE
Q3KQU3;Q3KQU3-2;Q3KQU3-4	FALSE	TRUE
Q3KUS7	TRUE	FALSE
Q3MHD2;Q3MHD2-2	FALSE	TRUE
Q3MIR4	TRUE	FALSE
Q3SY77;Q3SY77-2	TRUE	FALSE
Q3SYC2;Q3SYC2-2	FALSE	TRUE
Q3T906	TRUE	FALSE
Q3TTY5	TRUE	TRUE
Q3YAB7;Q6PIL6;Q6PIL6-2;Q6PIL6-3;Q6PIL6-4;Q6PIL6-5	TRUE	TRUE
Q3ZCV2;Q3ZCV2-2	FALSE	TRUE
Q460N5;Q460N5-1	TRUE	FALSE
Q495W5;Q495W5-2	TRUE	TRUE
Q49A26;Q49A26-2	FALSE	TRUE
Q4AC99	TRUE	FALSE
Q4KMQ2;Q4KMQ2-2;Q4KMQ2-3	TRUE	TRUE
Q4L235;Q4L235-2;Q4L235-3;Q4L235-4;R4GNB1	TRUE	TRUE
Q502W7	TRUE	FALSE
Q504Q3;Q504Q3-2;Q504Q3-3	TRUE	TRUE
Q504Y3	TRUE	FALSE
Q53GI3	TRUE	FALSE
Q53GT1	FALSE	TRUE
Q53H82	TRUE	TRUE
Q53LP3	FALSE	TRUE
Q53RE8	TRUE	FALSE
Q58FF6	TRUE	TRUE
Q5BJH7;Q5BJH7-3;Q5BJH7-6	TRUE	TRUE
Q5BKT4;Q5I7T1	TRUE	FALSE
Q5CZC0	TRUE	FALSE
Q5D862;Q5D862	TRUE	FALSE
Q5EBM0;Q5EBM0-3;Q5EBM0-4	FALSE	TRUE
Q5EG05;Q5EG05-2	TRUE	TRUE
Q5F1R6;Q5F1R6-2;Q5F1R6-3	FALSE	TRUE
Q5H8A4;Q5H8A4-2;Q5H8A4-3	TRUE	TRUE
Q5H909;Q9UNF1;Q9UNF1-2	FALSE	TRUE
Q5H9L2;Q6IPX3;Q6IPX3-2;Q969E4	TRUE	TRUE
Q5H9U9	FALSE	TRUE
Q5HYC2;Q5HYC2-2	TRUE	TRUE
Q5JR59	TRUE	TRUE
Q5JS37;Q5JS37-2	TRUE	TRUE
Q5JS54;Q5JS54-2	TRUE	FALSE
Q5JSZ5	TRUE	FALSE
Q5JTJ3;Q5JTJ3-2;Q5JTJ3-3	TRUE	TRUE
Q5JVF3;Q5JVF3-3;Q5JVF3-4	TRUE	TRUE
Q5JVS0	TRUE	TRUE
Q5JYG5;Q96I76	TRUE	TRUE
Q5JYT7	TRUE	FALSE
Q5K651	FALSE	TRUE
Q5M775;Q5M775-2;Q5M775-3;Q5M775-4;Q5M775-5	TRUE	TRUE
Q5M7Z0	FALSE	TRUE
Q5MIZ7;Q5MIZ7-2;Q5MIZ7-3	TRUE	FALSE
Q5PT55	TRUE	TRUE
Q5QP82;Q5QP82-2	TRUE	TRUE
Q5R372;Q5R372-4	TRUE	TRUE
Q5RHP9;Q5RHP9-2	TRUE	TRUE
Q5SGD2	FALSE	TRUE
Q5SRE5	TRUE	TRUE
Q5SW96	TRUE	TRUE
Q5SWH9	TRUE	FALSE
Q5SWW7	FALSE	TRUE
Q5SY16	TRUE	TRUE
Q5SYE7;Q5SYE7-2	TRUE	TRUE
Q5T0J7;Q5T0J7-2;Q5T0J7-3;Q5T0J7-4;Q5T0J7-5	TRUE	FALSE
Q5T0N5;Q5T0N5-2;Q5T0N5-3;Q5T0N5-4;Q5T0N5-5;S4R347	FALSE	TRUE
Q5T0W9	TRUE	FALSE
Q5T1H1;Q5T1H1-1;Q5T1H1-2;Q5T1H1-4	TRUE	FALSE
Q5T1M5	TRUE	FALSE
Q5T1R4;Q5T1R4-2	TRUE	TRUE
Q5T2T1	TRUE	FALSE
Q5T3F8	FALSE	TRUE
Q5T3Q7;Q9H583	FALSE	TRUE
Q5T481	TRUE	FALSE
Q5T7M4	TRUE	FALSE
Q5T7W7;Q5T7W7-2	TRUE	FALSE
Q5T8I3	TRUE	FALSE
Q5TAT6-9	TRUE	FALSE
Q5TBK1;Q9Y273	TRUE	TRUE
Q5TDE7;Q5TDE8;Q5VTB9;Q5VTB9-3	TRUE	TRUE
Q5THJ4;Q5THJ4-2	FALSE	TRUE
Q5TID7;Q5TID7-3	FALSE	TRUE
Q5TYW1	TRUE	TRUE
Q5U4P2	FALSE	TRUE
Q5UIP0;Q5UIP0-2	TRUE	TRUE
Q5URX0	TRUE	TRUE
Q5VIR6	TRUE	TRUE
Q5VSL9;Q5VSL9-2;Q5VSL9-3	FALSE	TRUE
Q5VSY0	TRUE	FALSE
Q5VT06	TRUE	TRUE
Q5VTE6	TRUE	FALSE
Q5VTQ0;Q5VTQ0-2;Q5VTQ0-3;Q5VTQ0-4	FALSE	TRUE
Q5VTR2	TRUE	FALSE
Q5VU65;Q5VU65-2	TRUE	TRUE
Q5VUB5	FALSE	TRUE
Q5VVH5;U3KQ57	FALSE	TRUE
Q5VW36;S4R400	TRUE	FALSE
Q5VWP3-2	FALSE	TRUE
Q5VWP3-3;Q5VWP3-4	TRUE	TRUE
Q5VWT5;Q5VWT5-2	TRUE	FALSE
Q5VWV2;Q8TEW0;Q8TEW0-11;Q8TEW0-2;Q8TEW0-3;Q8TEW0-4;Q8TEW0-5;Q8TEW0-6;Q8TEW0-7	TRUE	TRUE
Q5VWZ2	TRUE	TRUE
Q5VYS8;Q5VYS8-6	TRUE	FALSE
Q5W026;Q9BXX3;R4GNA2	FALSE	TRUE
Q5W0U4;Q5W0U4-2	TRUE	FALSE
Q5W125;Q9NWW6	FALSE	TRUE
Q5XKL5	TRUE	TRUE
Q5XLA6	FALSE	TRUE
Q5XUX1;Q5XUX1-2	TRUE	FALSE
Q5XXA6	FALSE	TRUE
Q63HQ2-3	TRUE	FALSE
Q63ZY3;Q63ZY3-2;Q63ZY3-3	FALSE	TRUE
Q658P3-2	TRUE	FALSE
Q658Y4	TRUE	TRUE
Q68D51;Q68D51-2;Q68D51-3	TRUE	TRUE
Q68D65	TRUE	TRUE
Q68DK2-3	TRUE	FALSE
Q68DU8	TRUE	FALSE
Q68EM7;Q68EM7-2;Q68EM7-5;Q68EM7-6	FALSE	TRUE
Q69YN4;Q69YN4-3	TRUE	TRUE
Q6DD87	TRUE	TRUE
Q6DT37	TRUE	TRUE
Q6IA69	FALSE	TRUE
Q6IA86;Q6IA86-2;Q6IA86-3;Q6IA86-5;Q6IA86-6	TRUE	TRUE
Q6ICG6;Q6ICG6-2;Q6ICG6-3	TRUE	FALSE
Q6IPR3;Q6IPR3-2;V9GZ67	FALSE	TRUE
Q6IQ16	TRUE	TRUE
Q6IQ20	TRUE	TRUE
Q6KC79	TRUE	TRUE
Q6NSJ2	TRUE	TRUE
Q6NT55	TRUE	FALSE
Q6NUI2-3	TRUE	FALSE
Q6NUK4	TRUE	FALSE
Q6NUQ4	TRUE	TRUE
Q6NXE6;Q6NXE6-2	TRUE	TRUE
Q6NZY7	TRUE	FALSE
Q6P161	FALSE	TRUE
Q6P2E9	TRUE	FALSE
Q6P2S7;Q6P2S7-2	TRUE	TRUE
Q6P4A8	TRUE	TRUE
Q6P4I2	FALSE	TRUE
Q6P6C2;Q6P6C2-1;Q6P6C2-3	TRUE	TRUE
Q6PCB0	TRUE	TRUE
Q6PHR2;Q6PHR2-3;Q6PHR2-4	FALSE	TRUE
Q6PIJ6;Q6PIJ6-2;Q6PIJ6-3	FALSE	TRUE
Q6PJG6	FALSE	TRUE
Q6PK18;Q6PK18-2	TRUE	TRUE
Q6PL18	FALSE	TRUE
Q6Q0C1	FALSE	TRUE
Q6Q759	TRUE	TRUE
Q6QNY1	TRUE	FALSE
Q6SA08;Q6SA08-2;Q6SA08-3	TRUE	TRUE
Q6ULP2;Q6ULP2-6;Q6ULP2-8;Q6ULP2-9	TRUE	TRUE
Q6UUV9;Q6UUV9-2;Q6UUV9-3	TRUE	TRUE
Q6UW02	TRUE	FALSE
Q6UW68	TRUE	TRUE
Q6UWV6	TRUE	TRUE
Q6UXN9	TRUE	TRUE
Q6XR72	FALSE	TRUE
Q6YHU6;Q6YHU6-2	TRUE	TRUE
Q6ZMK1	TRUE	FALSE
Q6ZN06	TRUE	TRUE
Q6ZNA5;Q6ZNA5-2	TRUE	FALSE
Q6ZQN7	TRUE	TRUE
Q6ZR85	TRUE	TRUE
Q6ZRF8	TRUE	TRUE
Q6ZRY4	TRUE	TRUE
Q6ZS30;Q6ZS30-1	TRUE	TRUE
Q6ZT12;Q6ZT12-4	TRUE	FALSE
Q6ZT62;Q6ZT62-2	TRUE	TRUE
Q6ZTR5	TRUE	TRUE
Q6ZU65;Q6ZU65-2	TRUE	FALSE
Q6ZUJ8	TRUE	TRUE
Q6ZV29;Q6ZV29-4;Q6ZV29-5	TRUE	TRUE
Q6ZVE7	FALSE	TRUE
Q6ZWH5	FALSE	TRUE
Q6ZXV5;Q6ZXV5-2	TRUE	TRUE
Q70CQ2;Q70CQ2-2;Q70CQ2-3	FALSE	TRUE
Q70E73-3;Q70E73-7	TRUE	TRUE
Q70UQ0	TRUE	TRUE
Q71UM5	TRUE	TRUE
Q76KP1	TRUE	TRUE
Q7L0X0	TRUE	TRUE
Q7L1S5	TRUE	FALSE
[truncated: 761 more rows]

## Sheet: E06_B_left
Relocalization from chow to HFHF-fed
Identifier	RL_LD	RL_ER	RL_NUCLEUS	RL_CYTOSOL	RL_GOLGI	RL_LYSOSOME	RL_PEROXISOME	RL_ENDOSOME	RL_PROTEIN-COMPLEX	RL_MITOCHONDRIA	RL_PM
A0A024QZ33;K7EK40;K7EMD8;K7ERM9;Q9H0G5	0	0	0	0	-0.516246	0	0	0	0.516246	0	0
A0A024QZW4;Q9H1N7	0	0	0	0	0.208212	0	0	-0.208212	0	0	0
A0A024QZX5;A0A087X1N8;A0A2R8YD12;P35237	-1	0	0	1	0	0	0	0	0	0	0
A0A024R3B9;E9PJL7;E9PNH7;E9PRA8;P02511	0	0	0	0.723878	0	0	0	0.276122	-1	0	0
A0A024R4E5;Q00341	0	0	0	0	0	0	0	0	0	0	0
A0A024R571;Q9H4M9
A0A024R5I4;O94956	0	0.210712	0	0	0	-0.277834	0	0	0	0	0.0671215
A0A024R6I7;P01009
A0A024R7W5;A0A087WY31;A0A087X0Q1;Q7Z739	0	1	-1	0	0	0	0	0	0	0	0
A0A024RA52;P25787	0	0	0	0	0	0	0	0	0	0	0
A0A024RAC6;Q14241	0	0	0	-1	1	0	0	0	0	0	0
A0A024RBG1;Q9NZJ9-2	0	0	0	0	0	0	0	0	0	0	0
A0A024RCG2;Q96BI1	0	0	0	0	0	0	0	0	0	0	0
A0A024RCN4;A0A087X2F1;B4DMT1;Q16670;Q16670-2	0	0	-0.37752	0	0	0.312835	0	0	0	0	0.0646848
A0A024RCQ8;A0A0G2JH76;A0A0G2JHB6;A0A0G2JIU6;A0A0G2JK02;A0A0G2JKR3;A0A0G2JLA3;A0A0G2JLL3;A0A140T8X7;A0A140T9Y1;G8JLL2;Q9UMR5;Q9UMR5-2;Q9UMR5-3	0	1	0	0	0	0	-1	0	0	0	0
A0A024RCR6;A0A0G2JK23;P46379;P46379-2;P46379-3	0	0	0	0	0	0	0	0	0	0	0
A0A044PY82	0	0	0.432546	0	0	-0.407769	0	0	0	0	-0.0247774
A0A067XG54;Q8NB49;Q8NB49-2;Q8NB49-3;Q8NB49-4
A0A075B6F0;H7BXG6;M0R167;Q9H0D2;Q9H0D2-2	0	0	0	0	-0.679789	0.429357	0	0.250432	0	0	0
A0A075B6F9;Q9Y314	0	0	0	1	-0.61232	0	0	-0.38768	0	0	0
A0A075B6G3;A0A087WTU7;A0A087WV90;A0A5H1ZRP8;P11532;P11532-11;P11532-4	0	0	0	0	0	0	0.449036	0	0	0	-0.449036
A0A075B6U9
A0A075B6W5	0.622563	0	-1	0	0.377437	0	0	0	0	0	0
A0A075B727;A0A075B728;P16284;P16284-2;P16284-3;P16284-4;P16284-5;P16284-6	0	0	0	0	0.369943	0	0	0	-0.369943	0	0
A0A075B730;P58107	0	0	-0.214278	0	0	0	0	0	0	-0.0677511	0.282029
A0A075B749;A0A087WX83;Q5VU43;Q5VU43-3;Q5VU43-4
A0A075B754;Q96QE3;Q96QE3-2	0	0	1	0	0	0	-1	0	0	0	0
A0A075B773;K7ELY8;O00623	0.563349	0	0	0	0	0	-0.385578	0	0	-0.368948	0.191177
A0A075B784;E9PEW0;K7ELR5;Q8IXW9;Q9P275	0	0	0	0	0	0	0	0	0	0	0
A0A075B7B1;C9JIE4;O15061;O15061-2;O15061-3	1	0	0	0	-0.608961	-0.391039	0	0	0	0	0
A0A075B7B5;B7ZM87;O75044
A0A075B7F1;S4R3C0	-0.682146	0	0	0	0	0	0.341454	0	0	0.340691	0
A0A087WSV6;A0A087WSX8;A0A0B4J1W1;A0A0G2JLS4;A0A0G2JM99;A0A0G2JMY9;A0A0G2JNK9;A0A0G2JNM2;A0A0G2JNQ6;A0A0G2JNR3;A0A0G2JP64;A0A0G2JP80;A0A0G2JP96;A0A0G2JQ15;A0A0G2JQ44;A0A0G2JQ46;A8MVE2;D9IDM5;D9IDM6;F6RVM3;F6TER3;O75019;O75019-2;Q8N6C8;Q8N6C8-3;Q8NHL6;Q8NHL6-2;Q8NHL6-3;Q8NHL6-4;Q8NHL6-5
A0A087WSW7;A0A0B4J1V9;F6XU50;Q9NRZ9;Q9NRZ9-2;Q9NRZ9-3;Q9NRZ9-4;Q9NRZ9-5;Q9NRZ9-6	-0.533754	0	0	0	-0.466246	0	0	0	1	0	0
A0A087WSW9;A0A087WSY9;Q16881;Q16881-3;Q16881-4	0	0	0	0	0	0	0	0	0	0	0
A0A087WSY5;Q96IY4	0	-1	0	0	0	1	0	0	0	0	0
A0A087WSZ7;A0A1B0GW84;D6RHE0;Q08493;Q08493-2;Q08493-3;Q08499;Q08499-10;Q08499-11;Q08499-2;Q08499-3;Q08499-4;Q08499-5;Q08499-6;Q08499-8;Q08499-9;Q32MM7	0.295308	0	0	-1	0.413192	0	0	0.2915	0	0	0
A0A087WT18;Q96A73;Q96A73-2	0.214904	0	0	0	0	-0.260658	0.42079	0	0	-0.0547058	-0.320331
A0A087WT20;Q9NV06	0	0	0	0	0	0	0	0	0	0	0
A0A087WT23;A0A087WV67;O00124;O00124-3	0	0.407987	0	0	-0.751497	0	0	0	0	0	0.343511
A0A087WT34	-0.765181	0	0	0	0.412255	0	0	0.352926	0	0	0
A0A087WT44	-0.285835	0.285835	0	0	0	0	0	0	0	0	0
A0A087WT59;P02766
A0A087WT84;Q9H9V9;Q9H9V9-2
A0A087WT87;P43003;P43003-2	0	0	0	0	0.249624	-0.469188	0	-0.081261	0	0	0.300825
A0A087WT95;P49753	0	0	0	0	0	0	0	0	0	0	0
A0A087WTA5;E7ERK9;Q9UI10;Q9UI10-2;Q9UI10-3	0	0	0	0	0	0	0	0	0	0	0
A0A087WTA8;P08123	0	0	-0.318962	0	0	0	0	0	0	0.318962	0
A0A087WTJ6;O14627;P47902;P47902-2;Q99626	0	0	0	0	0	0	0	0	0	0	0
A0A087WTK0;A0A087WVC6;Q12913	0	0.473443	0	0	0	-0.436931	0	0	0	0	-0.0365117
A0A087WTM1;Q9Y6N7;Q9Y6N7-2;Q9Y6N7-3;Q9Y6N7-4;Q9Y6N7-5;Q9Y6N7-6	0	0.534334	0	0	0	0	-1	0	0	0	0.465666
A0A087WTP3;Q92945
A0A087WTQ2;A0A3B3IT47;C9JGR9;E7EQ49;Q9Y2I8;Q9Y2I8-2;Q9Y2I8-3	0	0	0	-0.602328	0	0	0	0	0.602328	0	0
A0A087WTS0;H0YJK8;P18283	0	0	0	0	0	0	0	0	0	0	0
A0A087WTT2;Q5JWB9;Q96A57;Q96A57-2	0	0	0	0	0	0	0	0	0	0	0
A0A087WTU3;Q9Y6I9
A0A087WTV6;A0A087WZR9;Q96C36	0	0	0	0	0	0	-0.320748	0.459496	0	-0.679252	0.540504
A0A087WTY4;P49454	0	0	-0.73064	0	0.416849	0	0	0	0	0	0.313791
A0A087WTY7;Q9H227	0	0	0	0	0	0	0	0	0	0	0
A0A087WTZ8;E5RFJ1;E5RHW9;E5RIM1;Q96MF7	0	0	0	0	0	0	0	0	0	0	0
A0A087WU02;Q96RQ1	-0.200265	-0.45276	0	0	0.288791	0	0	0.364235	0	0	0
A0A087WU05;A0A087WY48;Q8IY22;Q8IY22-2;Q8IY22-3	0.330624	0	-1	0	0.313115	0	0	0.356261	0	0	0
A0A087WU07;Q5TGZ0;Q5TGZ0-2	0	0	0	0	0	0	0	0	0	0.341155	-0.341155
A0A087WU25	0	0	0.188572	0	0	0	0	0	0	-0.188572	0
A0A087WU31;A0A0A0MTB7;E9PE15;P51790;P51790-2;P51790-4;P51790-5	-0.311655	0	0	0	0.066708	0	0	0.244947	0	0	0
A0A087WU37;A0A087WWG3;A0A087X140;A0A0A0MRU4;A0A0A6YYH9;C9J3G2;H0Y857;Q5JTY5;Q5JTY5-2;Q5RIA9;Q5RIA9-3;Q5RIB0;Q5RIB3;Q8IUF1;Q9BRT8;Q9BRT8-2;Q9BRT8-3
A0A087WU51	0	0	0	0	-0.38951	0	0	0.415497	-0.0259873	0	0
A0A087WU53;Q9H0U3	0	0.292697	0	0	0	0	0	0	0	-0.292697	0
A0A087WUB9;Q8WYA6;Q8WYA6-4	0	0	0	0	0	0	0	0	0	0	0
A0A087WUC6;E9PI68;Q15005	0	0	0	0	0	0	0	0	0	0	0
A0A087WUD3;Q9NRP0;Q9NRP0-2
A0A087WUE2	0	0	0	0	0.321099	0	0	0.216116	-0.537215	0	0
A0A087WUE4;A0A0G2JNN3;C9JMY0;Q96PV6;Q96PV6-1	0	0	0.341595	0	0	0	0	0	0	0	-0.341595
A0A087WUE6;A4PB68;Q3T8J9;Q3T8J9-2;Q3T8J9-3;Q9H869;Q9H869-2;Q9H869-3;Q9H869-4;Q9H869-5;Q9H869-6;Q9H869-7;Q9H869-8;Q9H869-9	0.198414	0	0	0	-0.377784	-0.622216	0.464737	0	0	0	0.336849
A0A087WUI6;Q8WXW3	0	-0.0856933	0	0	-0.162626	0	0	0	0	0	0.248319
A0A087WUJ1;Q9H400;Q9H400-2	0	0	0	0	0	0	-0.581488	0	0	0	0.581488
A0A087WUJ4;Q92618	0	0	-0.41666	0	0.512364	-0.349686	0	0.487636	0	0	-0.233654
A0A087WUK2;O14979;O14979-2;O14979-3	0	0	0	0	0	0	0	0	0	0	0
A0A087WUL2	0	0	0	0	0	0	0	0	0	0	0
A0A087WUL4;A0A087WX23;A0A087WZG9;B4DSP0	0	0	0	0	0.433405	0	0	0.566595	-1	0	0
A0A087WUM5;Q5VZR0;Q9H4G4	0	0	0	0	0	-0.429725	0	0	0	0	0.429725
A0A087WUQ6;P07203	0	0	0	0	0	0	-1	0	0	1	0
A0A087WUT0;A0A0A0MR39	0	0	0	0	0	0	0	0	0	0	0
A0A087WUT6;O60841
A0A087WUU8;M0R3J2	0	0	0	0	0	0	0.571486	0	0	-0.571486	0
A0A087WUV9	-1	0	0	0	1	0	0	0	0	0	0
A0A087WUW9;Q9NXU5	0	0	-1	1	0	0	0	0	0	0	0
A0A087WUZ7;Q9Y5W8;Q9Y5W8-2	0	-0.3173	0	0	0.3173	0	0	0	0	0	0
A0A087WV01	0	0	0	0	0	0	0	0	0	0	0
A0A087WV05;Q99417
A0A087WV24;P20711;P20711-3	0	0	0	0	0	0	0	0	0	0	0
A0A087WV25;O95684;O95684-2	-1	0	0	1	0	0	0	0	0	0	0
A0A087WV39;Q92698;V9GYD3	0	0	-0.450821	0	0	-0.294676	0	0	0	1	-0.254503
A0A087WV96	-0.333949	0	0	0	-0.375343	0.39152	0	0	0	0	0.317772
A0A087WV97;Q8WU79;Q8WU79-2;Q8WU79-3	0	0	0	0	0	0	0	0	0	0	0
A0A087WVA1;P62341	0	0	0	0	0	0	0	0	0	0	0
A0A087WVA8;Q8IWB9;Q8IWB9-2
A0A087WVC1;Q9BQ39	0	0	0	0	0	0	0	0	0	0	0
A0A087WVE2;O00602	0	0	-0.348163	0	0.755018	-0.212946	0	0	0	0	-0.193909
A0A087WVF1;K7EQH1;Q96B23;Q96B23-2	0	0	-0.180146	0	0	0	0	0	0	0.563544	-0.383398
A0A087WVF7;Q9NZM3;Q9NZM3-2
A0A087WVI0;E9PBL8;Q8WTW3	0	0	0	-0.566114	0	0	0	0.349479	0.216635	0	0
A0A087WVM1;P78382;P78382-2;Q5W1L7	0	0	0	0	0	0	0	0	0	0	0
A0A087WVM4;B7ZM99	0.00359243	0	0	0	0	0	-0.391516	0	0	0.387923	0
A0A087WVP7;P0C024;P0C024-2	0	0	0	0	0	0	0	0	0	0	0
A0A087WVQ6;Q00610;Q00610-2	0	0	0	0	0	0	0	0	0	0	0
A0A087WVS8;Q70IA6;Q70IA6-3	0	0	0	0	0	0	0	0	0	0	0
A0A087WVT6;A0A087X159;D6RAC5;P81877;P81877-2;P81877-3;P81877-4;P81877-5;Q9BWW4;Q9BWW4-2;Q9BWW4-3	0	0	0	0	0.462357	0	0	-0.462357	0	0	0
A0A087WVT8;A0A087X1L3;Q6ZWJ8	0.284531	0	0.299473	0	0	-0.255876	-0.421249	0	0	0	0.093121
A0A087WVX4;P49895;P49895-2;P49895-4	0.13921	-0.13921	0	0	0	0	0	0	0	0	0
A0A087WVX5;A0A1B0GTA9;A0A1B0GTF6;A0A1B0GTN8;A0A1B0GTP5;A0A1B0GTS4;A0A1B0GTX2;A0A1B0GU53;A0A1B0GUI8;A0A1B0GUK4;A0A1B0GVB2;A0A1B0GWF9;A0A1C7CYX2;A0A2R8Y555;A0A2U3TZM7;A0A494C0B2;A0A494C0Z9;A0A494C184;E7EN11;F8VNV8;F8VU10;F8VUW8;H0Y476;O00305;O00305-2;O00305-3;O00305-4;P54284;P54284-2;P54284-3;P54284-4;P54284-5;Q02641;Q02641-2;Q02641-3;Q08289;Q08289-10;Q08289-2;Q08289-3;Q08289-4;Q08289-5;Q08289-6;Q0…	0	0.547454	0	0	0	-0.296613	0	0	0	0	-0.250841
A0A087WVZ7;A0A087X068;Q9UJW7;Q9UJW7-2	0	0.557369	0	0	-0.608536	-0.391464	0	0	0	0	0.442631
A0A087WVZ9;A0A0A0MQR7;P19388	0	0	0.510052	0	0	0	0	0	0	0	-0.510052
A0A087WW06;B0QYP5;Q96AY4	0.0335533	0	0	0	0.290875	0	0	0.300333	-0.624762	0	0
A0A087WW23;P20292	0	0	0.124668	0	0	0	0	0	0	0	-0.124668
A0A087WW28	0	0	0	0	-0.478853	0	0	0.277794	0.201059	0	0
A0A087WW48;E7ET14;H0Y3N9;H0Y589;O75151;Q9UPP1;Q9UPP1-2;Q9UPP1-3;Q9UPP1-4;Q9UPP1-5	0	0	0	-0.633528	1	0	0	0	-0.366472	0	0
A0A087WW58;Q9C0D9	-0.276954	0.603311	-0.390755	0	0	0	0	0	0	0	0.0643974
A0A087WW59;Q7Z7L8	0	0	0	0	0	0	0	0	0	0	0
A0A087WW66;Q99460;Q99460-2	0	0	0	0	0	0	0	0.219564	-0.219564	0	0
A0A087WW76;A0A1B0GTZ9;A0A1B0GV73;A0A452Q6Z5;H0Y468;Q5T5U3	0	0	-0.628492	0	0	0	0	0	0	-0.371508	1
A0A087WW77;Q15334	0	0	0	0	0	0	0	-0.68929	0.68929	0	0
A0A087WWA3;O60333;O60333-2;O60333-4;Q4R9M9	0	0	0	-0.0308017	0	0	0	0	0.0308017	0	0
A0A087WWA7;O14640;O14640-2;P54792;P54792-2	0	0	0	0	-0.404566	0	0	0.404566	0	0	0
A0A087WWF6;F8W8R3;P49005
A0A087WWG5	0	0	0	0	0	0	0	0	0	0	0
A0A087WWH3;Q9NZM4;Q9NZM4-2	0	0	0	0	0	0	0	0	0	0	0
A0A087WWI0	0	0	0	0	0	0	0	0	0	0	0
A0A087WWM0;O43617	0	0	0	0.423302	0	0	0	0	-0.423302	0	0
A0A087WWM4;H0YNJ6;Q9P2T1;Q9P2T1-2	0	0	0	-0.30383	0	0	0	0	0.30383	0	0
A0A087WWM6;E7EQL6;O43272;O43272-1;O43272-2	0.176133	0	0	0	0	0	0	0	0	-0.176133	0
A0A087WWP4;A0A494C001;A0A499FJY3;Q96T37;Q96T37-2;Q96T37-3;Q96T37-4	0	0	0	0	0	0	0	0	0	0	0
A0A087WWP5;Q12962	0	0	0	0	0	0	0	0	0	0	0
A0A087WWP8;A0A0C4DGT8;A0A0C4DH79;Q5VWQ0;Q5VWQ0-4	0	0	0	0	0.501306	0	0	0	0	-0.552389	0.051083
A0A087WWQ2;Q92979;V9GYP5	0	0	0	0	0	0	0	0	0	0	0
A0A087WWR2;H3BQI4;H3BQS2;I3L2Z5;P56270;P56270-2;P56270-3;P56270-4	0	0	1	0	-0.663902	0	0	-0.336098	0	0	0
A0A087WWS1;Q96FV9	0	0	0.458441	0	0	0	0	0	0	0	-0.458441
A0A087WWT7;A0A1W2PRP3;Q7Z7M1	0	0	0	0	0.0554535	-0.250969	0.536383	-0.340868	0	0	0
A0A087WWU8	0.436467	0	0.563533	0	-0.441183	0	0	0	-0.558817	0	0
A0A087WWW9;O95999	0	0	0	0	0	0	0	0	0	0	0
A0A087WWY0;P08519	-1	1	0	0	0	0	0	0	0	0	0
A0A087WX02;F8WB74;M0QYX1;P63302	-1	0	0	0	1	0	0	0	0	0	0
A0A087WX10;G3V4M2;G3V5E8;P54803	0	0	1	0	0	0	0	0	0	-1	0
A0A087WX11;J3KNG8;Q8TF40;Q8TF40-3	1	0	0	0	-0.412029	0	0	0	-0.587971	0	0
A0A087WX19;A0A087WX45;C9J5R6	0	0	0.210378	0	0	0	0	0	0	-0.210378	0
A0A087WX80;A0A087WYF1;P24043	0	0	-0.478454	0	0	0	0	0	0	0.478454	0
A0A087WX97;Q9BXK5	0	0	0	0	0	0	-1	0	0	1	0
A0A087WX99;A0A0G2JRA4;P55283;P55283-2	0	0.513463	0	0	0	-0.550449	0	0	0	0	0.036986
A0A087WXB0;O15126	0	0	0	0	0.479332	0	0	-0.479332	0	0	0
A0A087WXB8;C9J0E2;C9J480;C9JWJ3;C9JXM2;Q9Y274	0	0	0	0	0	0	0	0	0	0	0
A0A087WXC5;E7ESZ7;O95299	0	0	0	0	0	0	0	0	0	0	0
A0A087WXD1;Q96T83	0	0	0	0	0.455385	0	0	-0.455385	0	0	0
A0A087WXI2;Q9Y6R7	0.377011	0	0.622989	0	0	-0.245946	-0.412174	0	0	-0.341879	0
A0A087WXI5;P12830;P12830-2
A0A087WXK4;Q7Z3F1	0	-1	0	0	1	0	0	0	0	0	0
A0A087WXL6;B7Z879;Q9H270	0	0	0	0	0	0	0	0	0	0	0
A0A087WXM6;A0A0A6YYL6;J3KRX5;J3QQT2;P18621;P18621-3	0	-0.121755	0	0	0	0	0.284517	0	0	-0.162761	0
A0A087WXN9;Q765P7	0	0	0	0	0	0	0	0	0	0	0
A0A087WXS6;C9JBF1	-0.69608	0	0	0	0	0	0	0	0.69608	0	0
A0A087WXU0;A0A2R8Y4J4;Q9NWS8;Q9NWS8-2	0	0	0	0	0	0	0	0	0	0	0
A0A087WXV4;P41235;P41235-2;P41235-4;P41235-5;P41235-6	0	0	-0.488047	0	0.203732	0	0	0	0	0	0.284315
A0A087WXW3;Q9Y3P8	-0.726197	0	1	0	0	0	0	0	0	0	-0.273803
A0A087WXW6;A0A140TA70;A0A140TA74;A9JR48;Q9BXA9;Q9BXA9-2;Q9BXA9-3;Q9BXA9-4	0	0	-0.229641	0	0.333662	0	0	0.383745	-0.487766	0	0
A0A087WY00;F8W6H6;F8WE88;G3V394;Q9Y4I1;Q9Y4I1-2;Q9Y4I1-3	0	0	0.39408	0	0	-0.271474	0	0	0	-0.209861	0.0872556
A0A087WY55;Q9NP79	0	0	0	0	0	0	0	0	0	0	0
A0A087WY67;P0CG29;P0CG30;Q6ICJ4	0	0	0	0	0	0	0	0	0	0	0
A0A087WY71;Q96CW1;Q96CW1-2	0	0.539745	0	0	0	0	-0.115676	0	0	0	-0.424069
A0A087WY85;A0A0A0MQU3;D6RAH7;D6RFM0;H9KV45;P61077;P61077-2;P61077-3;P62837;P62837-2	0	0	0	1	0	0	0	-0.43743	-0.56257	0	0
A0A087WYD6;A0A0G2JLV0;Q03519;X5CMH5	-0.336787	0.336787	0	0	0	0	0	0	0	0	0
A0A087WYF7;Q6UXV4	0	0	0.148583	0	0	0	0	0	0	-0.148583	0
A0A087WYJ2;M0QZR8;M0R2B7;P28340
A0A087WYL6;A0A087WZG6;A0A087X1S9;Q8TEW8;Q8TEW8-2;Q8TEW8-3;Q8TEW8-5;Q8TEW8-6;R4GN62
A0A087WYM3;A0A0A0MRF5;E7EWX6;Q8IXJ6;Q8IXJ6-2;Q8IXJ6-3;Q8IXJ6-4
A0A087WYN9;Q7Z478	-1	0	0	0	0	0	1	0	0	0	0
A0A087WYP2;Q8IZQ5	0	0	0	0	0	0	0	0	0	0	0
A0A087WYR0;P09132	0	0	0	0	0	0	0	0	0	0	0
A0A087WYS3;Q9ULU4;Q9ULU4-10;Q9ULU4-11;Q9ULU4-12;Q9ULU4-13;Q9ULU4-19;Q9ULU4-22;Q9ULU4-7;Q9ULU4-8;Q9ULU4-9	0	0	0	0	0	0	0	0	0	0	0
A0A087WYT3;Q15185;Q15185-4	0	0	0	1	0	0	0	0	-1	0	0
A0A087WYV9;A0A087X1F5;P57105	0	0	0	0	0	0	0	0	0	0	0
A0A087WYX8;A0A1W2PQW0;A0A590UJL7;A0A5F9ZH12;A0A5F9ZHT2;A0A6Q8PH73;Q14CM0	0.360426	0	0	0	-0.241785	-0.29166	0	0.446268	0	0	-0.273249
A0A087WYY0;A0A087X260;B1AKP7;G3V162;Q13148	0	0	0	0	0	0	0	0	0	0	0
A0A087WZ13;E9PAU2;Q8IY67;Q8IY67-2	0	0	0	0	0	0	0	0	0	0	0
A0A087WZ32;A8K727;Q9HB19	0	0	0	0	0	0	0	0	0	0	0
A0A087WZ40;Q14244;Q14244-6;Q14244-7	0	0	0	0	0	0	0	0	0	0	0
A0A087WZ50;Q8TCT7;Q8TCT7-2;Q8TCT7-4	0	0	-0.32666	1	0	0	0	0	-0.67334	0	0
A0A087WZ62;Q9H6U8;Q9H6U8-3	-0.222049	0.581223	0	0	-0.359175	0	0	0	0	0	0
A0A087WZ97;A0A087WZK6;A0A087X2C2;Q5T7M9	0	0	0	0	0.274242	0	0	-0.274242	0	0	0
A0A087WZB5
A0A087WZC2;A0A0C4DGS8;E0YMJ8;P35680;P35680-2;P35680-3;P35680-4	0	0	0.591538	0	0	-0.320142	0	0	0	0	-0.271396
A0A087WZE9	-0.2249	0	0.2249	0	0	0	0	0	0	0	0
A0A087WZG4;A0A3B3IPE9;A0A590UK10;Q6ZSZ5;Q6ZSZ5-1;Q6ZSZ5-2;Q6ZSZ5-5;Q6ZSZ5-6	-0.24414	0	0	0.24414	0	0	0	0	0	0	0
A0A087WZK9;B3KS98;O15372	0	0	0	0	0	0	0	0.00408122	-0.00408122	0	0
A0A087WZM2;D6REQ6;D6RHI9;O00584	0	0	0.494438	0	0	-0.494438	0	0	0	0	0
A0A087WZM8;Q8TBM7;Q8TBM7-2;Q8TBM7-3	0	0.0055648	0	0	-0.502767	0	0	0	0	0	0.497203
A0A087WZN1;O43837	0	0	0	0	0	0	0	0	0	0	0
A0A087WZP9	0	-0.356011	0	0	0	0	0	0	0	0	0.356011
A0A087WZQ7;Q9H115	0	0	0	0	-0.544141	0	0	0	0	0	0.544141
A0A087WZT0;M0QY61;M0QZ22;M0R0X3;Q5PRF9	0	0	0	0	-0.0393421	0	0	0.0393421	0	0	0
A0A087WZT2;Q6UX53	0.153357	-0.605636	0	0	0	0.452279	0	0	0	0	0
A0A087WZT3;Q9H3K6	0	0	0	1	0	0	0	0	-0.588374	0	-0.411626
A0A087WZU2;E5RGN0;Q00536;Q00536-2;Q00536-3	0	0	0	0	0	0	0	0	0	0	0
A0A087WZU5;O43657
A0A087WZV0;O43314	0	0	0	0	0	0	0	0	0	0	0
A0A087WZY5;A8MXH5;F5H3Q5;F5H851;Q14031;Q14031-2	0	-1	0	0	1	0	0	0	0	0	0
A0A087X011;E9PES4;J3KPF9;Q9Y496	0	0	0	0	0	0	0	-0.366211	0.366211	0	0
A0A087X020;Q9Y3A5
A0A087X080;A0A0U1RRH1;A0A0X1KG73;Q15413;Q15413-2;Q15413-3	0.48484	0	0	0	-0.48484	0	0	0	0	0	0
A0A087X091	0	0	0	0	0.0426334	0	0	-0.0426334	0	0	0
A0A087X0D5;P09668	0	0	0	0	0	0.577296	-0.577296	0	0	0	0
A0A087X0F1;Q9UK61;Q9UK61-2;Q9UK61-3;Q9UK61-4	0	0	0	0	0	0	0	0	0	0	0
A0A087X0H8;Q15714;Q15714-2;Q15714-3	0	0	-0.350052	1	0	0	0	0	-0.649948	0	0
A0A087X0H9;Q5T8P6	0	0	0	0	0	0	0	0	0	0	0
A0A087X0K0;P39059	0	0	-0.413297	0	0	0	0	0	0	0.413297	0
A0A087X0K4;Q7Z408;Q7Z408-2;Q7Z408-4	0	0	-0.345406	0	0	0	0	0	0	0	0.345406
A0A087X0K9	0	0.430075	-0.384905	0	0	-0.294117	0	0	0	0	0.248946
A0A087X0L7;E7EVY0;J3KNA0;Q15070;Q15070-2	0	0	0	0	0	0	0	0	0	0	0
A0A087X0M4;Q9BWU0	0	0	-0.347143	1	0	0	0	0	-0.652857	0	0
A0A087X0P0	0	0	0.0853195	0	0.573149	0	0	0	0	-0.658469	0
A0A087X0Q9;Q9BVL4
A0A087X0R6;Q9UMY4;Q9UMY4-1	0	0	0	0	0	0	0	0	0	0	0
A0A087X0R7;Q9H4L4	0	0	0	0	0	0	0	0	0	0	0
A0A087X0R9;B8ZZK1;Q07837;Q07837-2;Q07837-5;Q07837-6;Q07837-7	-0.298479	0.559385	0	0	0	-0.378057	0	0	0	0	0.117151
A0A087X0S5;P12109	0	0	-0.416911	0	0	0	0	0	0	0.416911	0
A0A087X0T5;Q96AB6
A0A087X0V5;P29728;P29728-2
A0A087X0W8;Q04206;Q04206-2;Q04206-3;Q04206-4;Q2TAM5	0	0	0	0	0	0	0	0	0	0	0
A0A087X0W9;Q8N6M0	0	0	0	0	0	0	0	-0.266801	0.266801	0	0
A0A087X0X3;P52272;P52272-2	0	0	0	0	0	0	0	0	0	0	0
A0A087X0Y2;A0A087X248;A0A087X2I9;A0A096LPD8;F5GWV3;F5H3N7;F5H8B4;O14607;O14607-2;O14607-3;O14607-4;O14607-5	0.482848	0	-0.750429	0	0.267582	0	0	0	0	0	0
A0A087X108	0	0	0	0.351271	0	0	0	0	-0.351271	0	0
A0A087X117;A0A0G2JN29;Q15155	0	-0.674691	0	0	0	0	0.635215	0	0	0.0394751	0
A0A087X138;Q8TF71	-0.282647	0	0	0	0	-0.370762	0	0	0	0	0.653409
A0A087X1A8;A0A2R8Y3X7;D3VVH9;F5H211;G3V3R7;P54252;P54252-1;P54252-4	0	0	0	0	0	0	0	0	0	0	0
A0A087X1B2	0	0	0	0	0	0	0	0	0	0	0
A0A087X1B6;E9PEG3;F5GZG9;P10275;P10275-3;P10275-4	0	0	0	-1	0	0	0	1	0	0	0
A0A087X1E4;P53365;P53365-3	0.592961	0	0	-0.501491	0.407039	0	0	0	-0.498509	0	0
A0A087X1G1;H7BYD0;Q16718;Q16718-2	0	0	0	0	0	0	0	0	0	0	0
A0A087X1G4	0.297011	0	0.251878	0	0	-1	0	0	0	0.451111	0
A0A087X1J2	0	0	0	0	0	0	0	0	0	0	0
A0A087X1J7;P22352	0	0	-0.383705	0	0	0	1	0	0	-0.616295	0
A0A087X1K1;Q96C00	-0.514562	0	1	0	-0.485438	0	0	0	0	0	0
A0A087X1N3;F8WC38;O75818;O75818-2	0	0	0	0	0	0	0	0	-0.161545	0.459694	-0.298149
A0A087X1N7;P20929;P20929-2;P20929-3;P20929-4
A0A087X1P3;C9IYE1;F8W8P5;H7BYR4;Q86UW7;Q86UW7-2;Q86UW7-3	0	0	0	0	-1	0	0	0	1	0	0
A0A087X1P5;J3KQ41;J3QT95;Q9H9Q2;Q9H9Q2-3	0	0	-1	0.625926	0	0	0	0	0.374074	0	0
A0A087X1R3;A0A0C4DGX0;A6QL64;Q8N2N9	0	0	0	-1	0	0	0	0	1	0	0
A0A087X1S3	0	0	0	0	-0.134947	0	0	-0.397674	0	0	0.532621
A0A087X1W8;A0A0A0MTJ8;Q9BY67;Q9BY67-3;Q9BY67-4;Q9BY67-5;X5DQS5	0	0	0	0	0	0	0	0	0	0.561778	-0.561778
A0A087X1Z1;A0A0G2JPW5;A0A0G2JQX1;A0A0G2JSA7;Q96RT8;Q96RT8-2	-1	0	0	0	0.43317	0.263571	0	0	0	0	0.303259
A0A087X1Z3;Q9UL46	0	0	0	-0.00904629	0	0	0	0	0.00904629	0	0
A0A087X236;A0A0A0MRE2;C9J2A8;Q9NVP4;Q9NVP4-2;Q9NVP4-3;Q9NVP4-4;Q9NVP4-5	0	0	0	0	0	0	0.346844	0	0	-0.161408	-0.185437
A0A087X241;Q2NKQ1;Q2NKQ1-3;Q2NKQ1-4
A0A087X256;Q2M389	0	0	0	0	0	0	0	0	0	0	0
A0A087X266;Q9BXJ8	0	1	0	0	0	0	0	-1	0	0	0
A0A087X279;P09913	0	0	0	-0.381122	0	0	0	0	0.381122	0	0
A0A087X294;O75914;O75914-2;O75914-3;O75914-4	0	0	0	0	0	0	0	0	0	0	0
A0A087X295;E9PDU5;Q9NNW5	0	0	0	-1	0	0	0	0	1	0	0
A0A087X296;P23219;P23219-2;P23219-3;P23219-4;P23219-5;P23219-6	0	0	0.270465	0	0	0	0	0	0	0.0695199	-0.339985
A0A087X2A7;H0YBA5;H7BY63;Q8NB25;Q8NB25-2;Q8NB25-3;Q8NB25-4	1	0	0	0	-0.645709	-0.354291	0	0	0	0	0
A0A087X2B5;P35613;P35613-2	0	0.493607	0	0	0	-0.44352	0	0	0	0	-0.050087
A0A087X2D5;Q9BRJ2	0	0	-0.124784	0	0	0	0	0	0	0.124784	0
A0A087X2D8;O60271-2;O60271-4	0.442704	0	0	-1	0.557296	0	0	0	0	0	0
A0A087X2G6;A0A0C4DGU5;D6RIC3;Q9Y3C1;Q9Y3C1-2;Q9Y3C1-3	0	0	-0.336314	0	0	0	0	0	0	0.336314	0
A0A087X2I1;P62333	0	0	0	0	0	0	0	0	0	0	0
A0A088AWN3;A0A0A0MSY4;Q9BZ29;Q9BZ29-3;Q9BZ29-4;Q9BZ29-5	0	0	0	0	0	0	-0.413003	0	0	0.413003	0
A0A088AWN8;E7EP87;E9PH27;J3KS48;J3KT43;J3QRB0;Q9UHQ1;Q9UHQ1-2;Q9UHQ1-3;Q9UHQ1-4	-0.361558	0	0	-0.638442	0.484358	0	0	0.515642	0	0	0
A0A090HNM7;A0A1W2PS85;P28715;R4GMW8
A0A096LNH6;Q14185	0	0	0	0	0	0	0	0	0	0	0
A0A096LNV3;A0A096LP02;Q9Y508;Q9Y508-2	-0.256509	0	0	0	-0.743491	0	0	0.365961	0.634039	0	0
A0A096LP07;A0A096LPJ3;A8K070
A0A096LP22;A0A096LP34;C9J7Z1;Q86Y79	0	0	-0.676462	0	0	0	0	0	0	0.676462	0
A0A096LP69	0.448056	0	0	0	0	-0.45166	0	0	0	0	0.0036044
A0A096LPC5;A0A0A0MR88;Q9Y4E1;Q9Y4E1-1;Q9Y4E1-2;Q9Y4E1-6	0	0	0	0	0	0	0	0	0	0	0
A0A096LPE2	0.175741	-0.613094	0	0	0	0.437353	0	0	0	0	0
A0A096LPI6	0	0	0	0	0	0	0	0	0	0	0
A0A096LPJ4;P05161	0	0	0	0	0	0	0	0	0	0	0
A0A096LPJ9;A0A140G945;A0A140G945-2;E7EWH7;P02489
A0A0A0MQR2;Q9BY42	0	0	0	0	0	0	0	0	0	0	0
A0A0A0MQR4;I3L2J0;Q96RK0	0	0	-1	1	0	0	0	0	0	0	0
A0A0A0MQS1;Q53H96;Q53H96-2	-1	0	0	0.537387	0	0	0	0	0.462613	0	0
A0A0A0MQS9;A0A0A0MTC7;Q16363;Q16363-2	0	0	0.24441	0	0	0	0	0	0	-0.0513121	-0.193098
A0A0A0MQT0;P09455	0	0	0	0	0	0	0	0	0	0	0
A0A0A0MQU0;Q9BV38;U3KQC1	0	0	0	0	0	0	0	0	0	0	0
A0A0A0MQU4;Q96I15	0	0	0	0	0	0	0	0	0	0	0
A0A0A0MQU7;A0A0A0MTK8;F5H0K0;P20823;P20823-2;P20823-3;P20823-7;U3KQS6	0	0	0	0	0	0	0	0	0	0	0
A0A0A0MQV6;P09038;P09038-1;P09038-2;P09038-3	0	0	-0.438427	0	0	0	0	0	0	0	0.438427
A0A0A0MQX1;D6RGD1;Q9HD67	0	0	-0.330328	0	0	-0.359594	0	0	0	0	0.689922
A0A0A0MQX8;C9JP00;Q9NR56;Q9NR56-2;Q9NR56-5;Q9NR56-6;Q9NR56-7	0	0	-0.441758	0	0	0.441758	0	0	0	0	0
A0A0A0MQY7;A0A3B3ISH2;Q5VU97
A0A0A0MR02;P45880;P45880-1;P45880-2	0	0	0	0	0	0	0	0	0	0	0
A0A0A0MR03;A0A0J9YWB6;A0A0J9YWJ4;K7EJD2;Q9Y5B0;Q9Y5B0-4	0	0	0	-0.352752	0.352752	0	0	0	0	0	0
A0A0A0MR05;H3BM50;H3BN58;H3BPT1;H3BPU5;Q9BVC4;Q9BVC4-4;Q9BVC4-5	0	0	0	0	0.323791	-1	0	0.307601	0.368608	0	0
A0A0A0MR07;F5H5P4;P15498;P15498-2;Q96D37	0	0	0	-0.550946	0	0	0	0	0.550946	0	0
A0A0A0MR09;P43378	0.726581	0	-0.282623	0	0	0	-0.443958	0	0	0	0
A0A0A0MR11;A0A0A0MRS1;Q06730;Q06730-2;Q06730-3	0	0	0	0	0.285281	-0.558499	0	0	0.714719	0	-0.441501
A0A0A0MR25;A0A5S6RJB7;D2CGD1;E7EVR7;H7BXU9;H7C265;P21802;P21802-15;P21802-16;P21802-17;P21802-18;P21802-2;P21802-20;P21802-21;P21802-22;P21802-23;P21802-3;P21802-4;P21802-5;P21802-6;P21802-8;S4R381	0.23659	0	0.269072	0	-0.602449	0	0	-0.397551	0	0	0.494337
A0A0A0MR36;Q9ULV0-2
A0A0A0MR51;H7C2V0;O60427	0	-0.127077	0	0	0	0	0	0	0	-0.349222	0.476299
A0A0A0MR67;A0A0A0MSA1;E9PDI6;F5GY28;F5H522;Q13936;Q13936-10;Q13936-11;Q13936-12;Q13936-13;Q13936-14;Q13936-15;Q13936-16;Q13936-17;Q13936-18;Q13936-19;Q13936-2;Q13936-20;Q13936-21;Q13936-22;Q13936-23;Q13936-24;Q13936-25;Q13936-26;Q13936-27;Q13936-28;Q13936-29;Q13936-3;Q13936-30;Q13936-31;Q13936-32;Q13936-33;Q13936-34;Q13936-35;Q13936-36;Q13936-37;Q13936-4;Q13936-5;Q13936-6;Q13936-7;Q13936-8;Q13936…	-1	0	0	0	0.421859	0	0	0	0.578141	0	0
A0A0A0MR74;O75907	0	-0.203475	0	0	0.241425	-0.350503	0	0	0	0.312553	0
A0A0A0MRA5;B7Z4B8;M0R3F1;Q9BUJ2;Q9BUJ2-2;Q9BUJ2-4	0	0	0	0	0	0	0	0	0	0	0
A0A0A0MRA8;A8K968;Q9Y2J2;Q9Y2J2-2	0	0	0	0	0	0	-0.0863815	0	0	0	0.0863815
A0A0A0MRB5;Q8WXG6;Q8WXG6-2;Q8WXG6-3;Q8WXG6-4;Q8WXG6-5;Q8WXG6-6;Q8WXG6-7;Q8WXG6-8	0	0	0	0.172156	0.247516	0	0	0	-0.419672	0	0
A0A0A0MRD0;A0A2R8YCE3;F5H4B4;F5H4B4-2
A0A0A0MRE5;Q9ULH1;Q9ULH1-2
A0A0A0MRF6;Q99996;Q99996-1;Q99996-3;Q99996-5;Q99996-6
A0A0A0MRF9;P16885	0	0	0	-0.425089	0	0	0	0	0.425089	0	0
A0A0A0MRG8;Q16611	0	0	0	0	0	0	-0.512158	0	0	0.512158	0
A0A0A0MRH3;Q9Y2W7;Q9Y2W7-2;Q9Y2W7-3	0	0	-0.146319	0	0.302799	0.37646	-0.532939	0	0	0	0
A0A0A0MRI1;Q8IXQ4
A0A0A0MRI2;Q9UNH7	0	0	0	0.414096	0	0	0	0	-0.414096	0	0
A0A0A0MRJ0;Q5VT25;Q5VT25-2;Q5VT25-3;Q5VT25-4;Q5VT25-5;Q5VT25-6	0.125032	0	-0.28202	0	0	-0.220982	0.357404	0	0	0	0.0205665
A0A0A0MRJ6	0	0	0	0	0	0	0	0	0	0	0
A0A0A0MRJ7;P12259	-0.318821	-0.0942067	0	0	0	0.413028	0	0	0	0	0
A0A0A0MRM2;Q86VF7;Q86VF7-2;Q86VF7-3;Q86VF7-4	0.580257	0	0	0	-0.519092	0	0	-0.061165	0	0	0
A0A0A0MRM9;Q14978;Q14978-2;Q14978-3	0	0	0	0	0	0	0	0	0	0	0
A0A0A0MRP6;B7ZLQ5;P28370;P28370-2	0	0	0.295908	0	0	0	0	0	0	0	-0.295908
A0A0A0MRR7;P09234	0	0	0	0	0	0	0	0	0	0	0
A0A0A0MRT2;Q9BTA9;Q9BTA9-2;Q9BTA9-5	0	0	0.375132	0	0	-0.417	0	-0.583	0.624868	0	0
A0A0A0MRT6;Q8IZP0;Q8IZP0-2;Q8IZP0-3;Q8IZP0-4;Q8IZP0-5;Q8IZP0-6;Q8IZP0-9
A0A0A0MRW6;Q9H6R4;Q9H6R4-2;Q9H6R4-4	0	0	0.274355	0	0	0	0	0	0	0	-0.274355
A0A0A0MRX1;A0A0R4J2E6;A0A494C0F8;A0A494C147;A0A494C1D9;B1APY9;P26378;P26378-1;P26378-2;P26378-3;P26378-4;P26378-5;Q12926;Q12926-2
A0A0A0MRX8;A0A1B0GWI9;A0A1B0GWJ4;A0A2R8Y7V8;O00712;O00712-4;O00712-5;Q5VW26;Q5VW27;Q5VW30;U3KQE8	0	0	0	0	0	0	0	0	0	0	0
A0A0A0MRY0;B0QYI1;Q8WUA7;Q8WUA7-2;Q8WUA7-3;Q8WUA7-4	0	0	0	-0.44309	0	0	0	0	0.44309	0	0
A0A0A0MRZ1;Q9H9P5-1;Q9H9P5-3	1	0	0	0	0	0	0	-1	0	0	0
A0A0A0MRZ4;E7EMV7;Q15025;Q15025-2;Q15025-3;Q15025-4;Q15025-5;Q15025-6;Q15025-7;Q15025-8
A0A0A0MS14	-1	0	0	0.70486	0	0	0	0	0.29514	0	0
A0A0A0MS59;A0A0C4DFX4;Q6ZRS2;Q6ZRS2-2;Q6ZRS2-3	0	0	0	0	0	0	0	0	0	0	0
A0A0A0MS79;O14513	0.330032	0	0.669968	0	0	0	0	-0.415585	-0.584415	0	0
A0A0A0MS87	0	0	0	0	0	0	0	0	0	0	0
A0A0A0MS99;I3L4X2;P33527;P33527-2;P33527-3;P33527-5;P33527-9	0	0	-0.204514	0	0	-0.223038	0	0	0	0	0.427551
A0A0A0MSA9;A0A0C4DG49;P15151;P15151-2;P15151-3;P15151-4	-0.2657	0	0	0	-0.248839	-0.208908	0	0	0	0	0.723446
A0A0A0MSB4;Q6ZN50;Q969R2;Q969R2-2;Q969R2-3;Q969R2-6	1	0	-0.426963	0	-0.573037	0	0	0	0	0	0
A0A0A0MSB8;Q9UPT5;Q9UPT5-1;Q9UPT5-2;Q9UPT5-5;Q9UPT5-6
A0A0A0MSE3;D3DNG8;P30556	0	0.55656	0	0	0	-0.506961	0	0	0	0	-0.0495984
A0A0A0MSG0;A6NGB9	-1	0	0	1	0	0	0	0	0	0	0
A0A0A0MSH9;A0A494C1F7;A0A494C1P7;Q86WJ1;Q86WJ1-2;Q86WJ1-4	-0.354727	0	0.0156517	0	0.339075	0	0	0	0	0	0
A0A0A0MSI2;B3KPJ4;Q8IXK0;Q8IXK0-2;Q8IXK0-3;Q8IXK0-4;Q8IXK0-5	0	0	0	0	0	0	0	0	0	0	0
A0A0A0MSI6;B7Z1P2;Q9H4M3;Q9H4M3-2	-0.459304	0	-0.200752	0	0.41035	0	0	0.200001	0.0497053	0	0
A0A0A0MSI8;O00471
A0A0A0MSJ9;Q15283;Q15283-2	-0.517785	0	0	0	0	0.517785	0	0	0	0	0
A0A0A0MSK3;A0A0C4DH47;A0A498U6I9;C9JS68;P24557;P24557-2;P24557-3;P24557-4;Q53F23	0	0	0	0	0	0	0	0	0	0	0
A0A0A0MSK6;Q13017;Q13017-2
A0A0A0MSL1;Q8TDM6;Q8TDM6-2;Q8TDM6-3;Q8TDM6-4
A0A0A0MSM0
A0A0A0MSP4;Q86WC4	-0.598762	0	0	0	0.522972	0.0757902	0	0	0	0	0
A0A0A0MSQ0;P13797;P13797-2
A0A0A0MSS0;P60880	0	0.0486558	0	0	0	-0.231387	0	0	0	0	0.182731
A0A0A0MSS8;P42330	0	0	0	0	0	0	0	0	0	0	0
A0A0A0MST8;C9JRP1;E9PFN4;Q9Y6M7;Q9Y6M7-12;Q9Y6M7-13;Q9Y6M7-2;Q9Y6M7-6;Q9Y6M7-7;Q9Y6M7-8;Q9Y6M7-9	0	0	0	0	0	-0.48737	0	0	0	0	0.48737
A0A0A0MSU4;O94911-3	-0.582652	1	0	0	0	0	0	0	0	0	-0.417348
A0A0A0MSV9;A0A0G2JH37;A0A0G2JKZ1;A2AB90;O15533;O15533-2;O15533-3	0	-0.261568	0	0	0	0	0	0	0	0	0.261568
A0A0A0MSW2;E9PEI2;Q9BQW3;Q9BQW3-1	0.334059	0	0	0	0.665941	0	0	0	0	-0.431607	-0.568393
A0A0A0MSX9;P41252	0	0	0	0	0	0	0	0.220647	-0.220647	0	0
A0A0A0MSY7;O00142;O00142-4;O00142-6	0	0	0	0	0	0	0	0	0	0	0
A0A0A0MSZ9;Q05048	0	0	0	0	0	0	0	0	0	0	0
A0A0A0MT02;A2ABK4;P18615;P18615-3	0	0	1	0	0	0	0	-1	0	0	0
A0A0A0MT16;Q86UQ4;Q86UQ4-3;Q86UQ4-4	0	0	0	0	0	-0.573265	0	0	0	0	0.573265
A0A0A0MT32;P38571;P38571-2
A0A0A0MT35;A0A2P0CTB1;Q8TBF2;Q8TBF2-3
A0A0A0MT61;G5E979;H7BYM2;Q8WYN0;Q8WYN0-3;Q8WYN0-5	0.2507	0	0	0	0	0	-0.2507	0	0	0	0
A0A0A0MT72;C9JUH3;Q9BSQ5;Q9BSQ5-2;Q9BSQ5-3	0	0	0	0	0.566679	0	0	0.153706	-0.720385	0	0
A0A0A0MT83;P26440	0	0	0	0	0	0	0	0	0	0	0
A0A0A0MT93	0	0	0.324926	0	0.0998745	0	0	0	0	0	-0.424801
A0A0A0MTC2;D6RA37;D6RDV0;D6RIY7;Q13454;Q13454-2	0	-0.0904583	0.190287	0	0	0	0	0	0	-0.0998292	0
A0A0A0MTG5;P13232;P13232-2;Q5FBX5	-0.460761	0	0.540927	0	-0.539239	0	0.459073	0	0	0	0
A0A0A0MTH3
A0A0A0MTH9;O14981	0	0	-0.488632	0	0.209004	0	0	0.269178	0.01045	0	0
A0A0A0MTJ9;Q6PIU2;Q6PIU2-2	0	0.295514	0	0	0	0	0	0	0	-0.295514	0
A0A0A0MTK0;A0A0A0MTP0;F5GWB1;Q7Z6B0;Q7Z6B0-2	0	0	0	0.371492	0	0	0	0	-0.371492	0	0
A0A0A0MTL6;Q6ZS17;Q6ZS17-2;Q6ZS17-3;Q6ZS17-4	-0.244136	0	0	-0.755864	0	0	0	0.319551	0.680449	0	0
A0A0A0MTL7;A0A0D9SGH8;C6ZRJ6;C6ZRJ7;C6ZRK5;E2GH26;Q5JRY3;Q5JRY4;Q5JRY5;Q5VVR7;Q9NQB0;Q9NQB0-10;Q9NQB0-11;Q9NQB0-12;Q9NQB0-13;Q9NQB0-14;Q9NQB0-15;Q9NQB0-16;Q9NQB0-17;Q9NQB0-2;Q9NQB0-3;Q9NQB0-4;Q9NQB0-5;Q9NQB0-6;Q9NQB0-7;Q9NQB0-8;Q9NQB0-9	0	0	-0.241954	0	0	0	0	0	0	0.403874	-0.16192
A0A0A0MTN0;Q13617;Q13617-2	0	0	0	-0.0833208	0	0	0	0	0.0833208	0	0
A0A0A0MTN3	-0.791251	0	0	0.791251	0	0	0	0	0	0	0
A0A0A0MTP7;F8VXG7;Q99590;Q99590-2	0	0	0.586566	0	0	0	0	0	-0.586566	0	0
A0A0A0MTQ3;Q96N23;Q96N23-2	-0.440307	0	0.571335	0	-0.559693	0	0	0	0	0.428665	0
A0A0A0MTQ8;P0C221	0	0	-0.418299	0	0.335263	-0.32522	0	0	0	0.664737	-0.256481
A0A0A0MTR7;Q63HN8	0	0	0	0	0	0	0	0.00395676	-0.00395676	0	0
A0A0A0MTS7;Q8WZ42;Q8WZ42-12;Q8WZ42-13;Q8WZ42-2;Q8WZ42-8	0	0	0.203916	0	0	0	0	0	0	-0.203916	0
A0A0A0MTS9;K7EKZ0;K7EP24;K7ER94;Q2V2M9;Q2V2M9-2;Q2V2M9-3;Q2V2M9-4	0	0	0.484542	0	-0.586659	-0.413341	0	0	0	0	0.515458
A0A0A0MTU3;Q4ZIN3;Q4ZIN3-2	0	-0.239701	0	0	0.239701	0	0	0	0	0	0
A0A0A6YYA0;Q86XR7-2;Q9Y3B3;Q9Y3B3-2	0	-0.520111	0	0	0.520111	0	0	0	0	0	0
A0A0A6YYC0;E9PJN1;O75676;O75676-2	0	0	0	0	0	0	0	0	0	0	0
A0A0A6YYC7;Q96JP5;Q96JP5-2	0	0	-0.300706	1	0	0	0	0	-0.699294	0	0
A0A0A6YYG9;F8WCF6;F8WDD7;P59998;P59998-2;P59998-3	0	0	0	-0.348463	0	0	0	0	0.348463	0	0
A0A0A6YYH1;Q7Z6K5;Q7Z6K5-2	0	0	0	0	0	0	0	0	0	0	0
A0A0A6YYI3;A0A0B4J1V8;A8MV53;Q9NQ55;Q9NQ55-2;Q9NQ55-3	0	0	0	0	0	0	0	0	0	0	0
A0A0A6YYL2;P0DMM9;P0DMM9-3;P0DMN0	0	0	0	0	0	0	0	0	0	0	0
A0A0A6YYL4;P57737-3	0	0	0	0	0	0	-0.582761	0	0	0.582761	0
A0A0B4J1R2;Q9H6R3	0	0	0	0	0	0	0	0	0	0	0
A0A0B4J1R4;P32754	0	0	0	0	0	0	0	0	0	0	0
A0A0B4J1R7;Q96B45
A0A0B4J1S8;Q9UBF8;Q9UBF8-2;Q9UBF8-3	0	0	0	-1	0	0	0	1	0	0	0
A0A0B4J1W0;B9TX62;F5GY88;H0YEG1;O75448;O75448-2	0	0	0	0	0	0	0	0	0	0	0
A0A0B4J1Y2;Q8NDW8;Q8NDW8-3;Q8NDW8-5;Q8NDW8-6;Q8NDW8-7	0	0.484035	0	0	0	0	0.515965	0	0	-1	0
A0A0B4J1Z1;C9JAB2;Q16629;Q16629-2;Q16629-3;Q16629-4	0	0	0	0	0	0	0	0	0	0	0
A0A0B4J269	0	0	0	-0.611263	0	0	0	0	0.611263	0	0
A0A0B4J291;Q8N8U2	-0.294849	0	0	-0.705151	1	0	0	0	0	0	0
A0A0B4J294;H3BP13;Q9UL33;Q9UL33-2	0	0	0	-1	0	0	0	1	0	0	0
A0A0B4J297;I3L4V0;Q9BRA0;Q9BRA0-2	0	0	0	0	0	0	0	0	0	0	0
A0A0B4J2A0	0	0	0	0	0	0	0	0	0	0	0
A0A0B4J2C2;F8WF49;Q9Y2H0;Q9Y2H0-1;Q9Y2H0-3	0	0	0	0	0	0	0	0	0	0	0
A0A0B4J2C3;J3KPG2;P13693;Q5W0H4	0	0	0	1	0	0	0	-1	0	0	0
A0A0B4J2D5;P0DPI2	0	0	0	0	0	0	0	0	0	0	0
A0A0B4J2E5;Q15269	0	0	0	0	0	0	0	0	0	0	0
A0A0B4J2F0	0	0	0	0	0	0	0	0	0	0	0
A0A0B4J2F8;E2QRJ6;F6S314;P52435	0	0	0	0	0	0	0	0	0	0	0
A0A0B4J2G4;Q15345;Q15345-3	0	0	0.486636	-0.602105	0	0	0	0.513364	-0.397895	0	0
A0A0C3SFZ9;M0QXD1;M0QY09;M0QZE1;M0QZI3;M0R1K4;M0R3E5;O14526;O14526-2;O14526-3	0	0	0	0	0.128308	0	0	0.468546	-0.596854	0	0
A0A0C4DFL7;Q16850	0	0	0	0	0	0	0	0	0	0	0
A0A0C4DFL8;F5GX28;O94953	0	0	0	0	0	0	0	0	0	0	0
A0A0C4DFM1;Q92544	0	0	0	0	0.102769	0	0	-0.102769	0	0	0
A0A0C4DFM7;Q5TAX3	0	0	0	0	0	0	0	0.381963	-0.381963	0	0
A0A0C4DFP6;Q5T4F6;Q9NQ79;Q9NQ79-2;Q9NQ79-3	0	0	0	0	0	0	-0.298031	0	0	0.298031	0
A0A0C4DFR1;O75069;O75069-2;O75069-3;O75069-5
A0A0C4DFU4;Q9HBG7-4
A0A0C4DFV0;Q9H469	0	0	0	1	0	0	0	-1	0	0	0
A0A0C4DFW4;Q5JUR7	0	0	0	0	0	0	0	0	0	0	0
A0A0C4DFX2;A0A286YFA9;A0A2R8Y5V8;A0A2R8YCY2;Q5TBA9	0	0	0	0	0	0	0	-0.47264	0.47264	0	0
A0A0C4DFX9;Q9H3P2	0	0	0	0	0	0	0	0	0	0	0
A0A0C4DFY5;A8MXZ4;J9JIE0;Q9NQ84;Q9NQ84-2	-0.21572	-0.478644	0.330029	0	0	-0.305636	0	0	0	0	0.669971
A0A0C4DFY7;Q6UWW8;Q6UWW8-2	-0.182143	0	0.432662	0	0.00774413	-0.231139	0	0	0	0	-0.0271243
A0A0C4DFZ2;P15289;P15289-2	0	0	0	0	0	1	-0.519548	0	0	-0.480452	0
A0A0C4DG02;F8WE91;Q9Y6K1;Q9Y6K1-2	0	0	0	0	0	0	0	0	0	0	0
A0A0C4DG17;C9J9K3;P08865	0	-0.430556	0	0	0	0	0.430556	0	0	0	0
A0A0C4DG21;A0A7D9NKC8;E7EP65;E7EW77;E9PEZ7;F8WAL6;Q9NYB9;Q9NYB9-2;Q9NYB9-4	0.322417	0	0	0	-0.173277	0	0	0	0	0	-0.14914
A0A0C4DG26;Q9NP71;Q9NP71-2;Q9NP71-3;Q9NP71-4;Q9NP71-6	0	0	-0.216205	-0.783795	1	0	0	0	0	0	0
A0A0C4DG40;Q8NF91;Q8NF91-4
A0A0C4DG51;Q9NP80;Q9NP80-3	0	0	0	0	0	0	-0.0035728	0	0	0.0035728	0
A0A0C4DG62;F5GYV5;F8WCT1;H7BZV4;Q66PJ3;Q66PJ3-2;Q66PJ3-3;Q66PJ3-4;Q66PJ3-7	0	0	0.39066	0	0	0	0	0	0	0	-0.39066
A0A0C4DG80;Q9P2N7;Q9P2N7-2;Q9P2N7-3;Q9P2N7-4;Q9P2N7-5
A0A0C4DG85;P40394;P40394-2	0	0	0	0	0	0	0	0	0	0	0
A0A0C4DG88;P14859;P14859-2;P14859-3;P14859-4;P14859-5;P14859-6	0	0	0	0	0	0	0	0	0	0	0
A0A0C4DG89;Q7L014	0	0	0	0	0	0	0	0	0	0	0
A0A0C4DG90;A4D0S4;A4D0S4-3	0	0	0.0368993	0	0	-0.280454	0.622471	0	0	0	-0.378917
A0A0C4DG91;A0A2R8Y7V2;C9J9V6;C9JQB1;O75414	0	0	0	0	0	0	0	0	0	0	0
A0A0C4DG95;C9IYJ2;E9PD56;F8WDF7;H7BYG4;Q7Z7A4;Q7Z7A4-2;Q7Z7A4-4;Q7Z7A4-6;W5RWE6	0	0	-0.209637	0	0.561024	0	0	0	0	0	-0.351387
A0A0C4DGA2;O75521;O75521-2	0	0	0	0	0	0	-0.271085	0	0	0.271085	0
A0A0C4DGA6;Q14527;Q14527-2	0	0	0.671181	0	0	-0.208444	0	0	0	-0.253429	-0.209308
A0A0C4DGA7;O94929;O94929-3	0	0	0.193892	0	0	-0.319283	0	0	0	0	0.125391
A0A0C4DGB0;Q9UIL1;Q9UIL1-2;Q9UIL1-3	0	0	0	1	0	0	0	0	-1	0	0
A0A0C4DGB9	0	0	0	0	0	0	0	0	0	0	0
A0A0C4DGE4;A0A0J9YW33;A0A286YF28;Q13277;Q13277-2;Q13277-3	0	0.337857	0	0	0	-0.212555	0	0	0	0	-0.125302
A0A0C4DGE7;Q86UK5;Q86UK5-2;Q86UK5-3	0	0	-0.280868	1	0	0	0	0	-0.719132	0	0
A0A0C4DGF7;Q6UXC1;Q6UXC1-2;Q6UXC1-3	0.345392	0	0.336226	0	0	0	-0.313558	0	0	-0.36806	0
A0A0C4DGG1;Q9UKS6	0	0.621478	0	0	0	-0.419543	0	0	0	0	-0.201935
A0A0C4DGG9;A0A2R8Y212;A0A2R8Y425;A0A2R8Y521;A0A2R8Y5J0;A0A2R8YFK9;A0A2U3TZM0;F5GWX5;Q14839;Q14839-2	0	0	0	0	0	0	0	0	0	0	0
A0A0C4DGH0;Q5ZPR3;Q5ZPR3-3;Q5ZPR3-4	0	0.155019	0	0	0	-0.274874	0	0	0	0	0.119855
A0A0C4DGH6;A0JNW5	0	0	-0.376941	0	0	0	0	0	0.376941	0	0
A0A0C4DGI4	0	0	1	0	-0.331137	0	0	0	0	-0.668863	0
A0A0C4DGM9;B7Z896;F5H3M2;Q9BVG8;Q9BVG8-2;Q9BVG8-4;Q9BVG8-5;Q9BVG8-6	0	0	-0.195369	0	0	0	0	0	0	-0.0529947	0.248364
A0A0C4DGN6;J3QRU8;Q9Y2X7;Q9Y2X7-3	0	0	0	0	0	0	-1	0	0	1	0
A0A0C4DGP0;E7EU35;Q9UKF7-2	0.0786426	0	0	-0.0786426	0	0	0	0	0	0	0
A0A0C4DGQ4;Q86W25	0	0	0	1	0	0	0	0	-1	0	0
A0A0C4DGQ5;P04632	0	0	0	0	0	0	0	0	0	0	0
A0A0C4DGQ8;Q6IAN0	0	-0.314887	0	0	0	0	0.314887	0	0	0	0
A0A0C4DGR2;M0QY25;M0QYH7;M0QYQ4;M0QZQ2;Q71SY5;Q71SY5-4;Q71SY5-5;Q71SY5-6;Q86YD1;Q86YD1-2	0	0	-0.418577	0	0.418577	0	0	0	0	0	0
A0A0C4DGS1;P39656;P39656-3	0	0.392047	0	0	0	0	0	0	0	-0.392047	0
A0A0C4DGV4;E9PLX3;O43504;R4GMU8	0	-1	0	0	0	1	0	0	0	0	0
A0A0C4DGZ4;Q9Y5U4	0	0.509281	0	0	-1	0	0	0	0	0	0.490719
A0A0C4DH01;Q9NVU0;Q9NVU0-2;Q9NVU0-3;Q9NVU0-4;Q9NVU0-5	0	0	-0.201794	0	0	0	0	0.0620107	0.139783	0	0
A0A0C4DH13;E5RG96;J3KQJ9;Q8N2E2
A0A0C4DH16;B8ZZS0;H7BXT7;Q9NYM9	0	0	0	0	0	0	0	0	0	0	0
A0A0C4DH36	0	0	0.635869	0	0.00860269	-0.306426	0	-0.338045	0	0	0
A0A0D2X7Z3;Q49AN0;Q49AN0-2	-1	0	0	0	1	0	0	0	0	0	0
A0A0D9SEI0;Q9P0P8	0	0	0	0	0	0	0	0	0	0	0
A0A0D9SEI3;A0A0D9SEN2;A0A0D9SER5;P21127;P21127-2;P21127-3;P21127-8	0	0	0	0	0	0	0	0	0	0	0
A0A0D9SEJ5;F5GY05;Q96EK7;Q96EK7-2	0	0	0	0	-0.505254	0	0	0.422688	0.577312	-0.494746	0
A0A0D9SEK1
A0A0D9SEN7;A0A2R8Y7Z3;I3L0L0;Q13950;Q13950-2;Q13950-3	0	0	0.457097	0	0	-1	0	0	0	0.542903	0
A0A0D9SES8;H0YKN8;H0YKT5;H0YL70;H0YNI7;H0YNT2;Q04724;Q04726;Q04726-2;Q04726-3;Q04726-4;Q04726-5;Q04726-6;Q04726-7;Q04727;Q04727-2;Q04727-3;Q04727-4	0	0	0	0	-0.435357	0	0	0	0.435357	0	0
A0A0D9SET2;A0A0D9SFD0;A0A0D9SGI5;A0A0R4J2G5;A0A1B0GTW4;A0A1B0GV32;D6R942;D6RB91;D6RC63;D6RCM6;D6RG14;D6RG21;D6RJA7;D6RJG6;D8L7E9;H0YM62;Q02078;Q02078-2;Q02078-3;Q02078-4;Q02078-5;Q02078-6;Q05BX2;Q06413;Q06413-2;Q06413-3;Q06413-4;Q06413-5;Q06413-6;Q14814;Q14814-2;Q14814-3;Q14814-4;Q14814-5;Q14814-6	0	0	0	0	0	0	0	0	0	0	0
A0A0D9SEU5;Q6VN20;Q6VN20-3;R4GMX8	0	0	0	0	0	0	0	0	0	0	0
A0A0D9SEX5;Q9H6R6;Q9H6R6-2	-0.105109	0.326605	0	0	0.256248	-0.386753	0	0	0	0	-0.0909912
A0A0D9SEY1;E7EN19;E7ENQ1;G3XAA2;G5E948;H7C360;O95819;O95819-2;O95819-3;O95819-4;O95819-5;O95819-6
A0A0D9SF44;A0A0R4J2E2;Q9Y3T6;Q9Y3T6-3	0	0	0	1	0	0	0	0	-1	0	0
A0A0D9SF53;A0A0D9SFB3;A0A0D9SG12;A0A2R8Y4A4;A0A2R8Y645;A0A2R8YCW1;A0A2R8YF78;A0A2R8YFR4;A0A2R8YFS5;A0A2U3TZJ9;O00571
A0A0D9SF60;Q99569;Q99569-2	0	0	-0.0961118	0	0	0	0	0	0	0	0.0961118
A0A0D9SF63;Q9BZK7	0.47269	0	0.124518	0	0	0	0	0	-0.597207	0	0
A0A0D9SFB1	-0.371678	0	0	0	-0.305981	0	1	0	0	0	-0.322341
A0A0D9SFB5;P08319;P08319-2	0	0	0	0	0	0	0	0	0	0	0
A0A0D9SFE1;Q9H936	0	0	0	0	0	0	0	0	0	0	0
A0A0D9SFG6;O43739;O43739-2;Q15438;Q15438-2;Q15438-3;Q99418;Q99418-2
A0A0D9SFJ2;A0A1B0GWF1;A0A2R8Y5Y4;A0A2R8Y6P1;Q6ZU35
A0A0D9SFK2;Q92614;Q92614-3;Q92614-4	0	0	0	0	0	0	0	0	0	0	0
A0A0D9SFR6;Q16760;Q16760-2;Q86XP1;Q86XP1-2;Q86XP1-3;Q86XP1-5	-0.600679	0	0	0	1	0	0	-0.399321	0	0	0
A0A0D9SFT8	0	0	0	0	0.346404	0	0	-0.346404	0	0	0
A0A0D9SG71;P49459;P49459-3	1	0	0	0	0	0	0	0	-1	0	0
A0A0D9SG72;A0A1B0GTP9;A0A1B0GVQ5;A0A1B0GWF2;A0A2R8Y5D4;P61764;P61764-2	0	0.0325266	0	0	0	0	0	0	0	0	-0.0325266
A0A0D9SG79;Q9NZ09;Q9NZ09-3;Q9NZ09-4
A0A0D9SG96;Q9ULB1-3	0.338355	0	0	0	0	0	0	-0.367666	0.0293112	0	0
A0A0D9SGD6;B0QZE2;B7Z2J6;E7ENI9;E7EV75;Q15326;Q15326-2;Q15326-5	0	0	0.362241	0	-0.362241	0	0	0	0	0	0
A0A0D9SGF6;Q13813;Q13813-2	0	0	-0.339864	0	0	0	0.339864	0	0	0	0
A0A0D9SGH0;A0A1B0GV11;Q92581;Q92581-2;Q92581-3	0	0	0	0	-0.0620413	0	0	0.0620413	0	0	0
A0A0D9SGJ6;C9JFZ1;J3KPK1;J3KQV8;O43426;O43426-2;O43426-4
A0A0G2JH30;A0A0G2JPX0;A0A2R8YFP9;A6NK88;P49918;P49918-2
A0A0G2JH68;O60610	0	0	0	-0.310122	0	0	0	0	0.310122	0	0
A0A0G2JHC2;Q6NYC8	0	0	0	0	0	-0.538368	0	0	0	0	0.538368
A0A0G2JHL0;A0A0G2JK44;A0A140T9E9;A0A140T9F7;A0A140T9V2;H0Y6K2;P25440;P25440-2;P25440-3;U3KQA6	0	0	0	0	0	0	0	0	0	0	0
A0A0G2JI43;A0A0G2JIJ2;A0A140T926;A0A140T9C9;A0A140T9I2;A0A140T9R0;A0A140T9R2;A0A140T9T8;A0A140T9U6;F6UB75;P28068	1	0	0	0	0	0	0	0	-1	0	0
A0A0G2JIR1;A0A0G2JIS2;A0A0G2JK64;A0A0G2JRN8;A0A0G2JRR0;A2ABF8;A2ABF9;Q96KQ7;Q96KQ7-2	0	0	0	0	0	0	0	0	0	0	0
A0A0G2JIW1;P0DMV8;P0DMV9	0	0	0	0	0	0	0	0	0	0	0
A0A0G2JJD3;O95870	0	0	0	0	0	0	0	0	0	0	0
A0A0G2JJP1;Q9C019	0	-1	0	0	0	1	0	0	0	0	0
A0A0G2JL52;A0A140T8Y0;A0A140TA35;B4E0K6;Q5ST30;Q5ST30-4	0	0	0	0	0	0	0	0	0	0	0
A0A0G2JLK7
A0A0G2JLQ8;A0A0G2JLX3;A0A0G2JNC8;A0A0G2JP37;A0A0G2JPB6;A0A0G2JPQ2;F5H5B1;F5H7Q5;J3KN39;K7EJ90;K7ELX1;Q9NX02;Q9NX02-2;Q9NX02-3;Q9NX02-4	0	0	0	0	0	0	0	-1	0	0	1
A0A0G2JM39;A0A0G2JN91;A0A0G2JNH1;M0QYD1	0	0	0.262603	0	0	0	0	0	0	-0.262603	0
A0A0G2JM63;A0A0G2JNK3;A0A0G2JPH3;Q8WX94-2;Q8WX94-3
A0A0G2JM70;Q9NV79;Q9NV79-2;Q9NV79-3;V9GZ41	0	0	0	0	0	0	0	0	0	0	0
A0A0G2JMD2;A0A2R9YJI8	0	0.0198598	0	0	-0.0198598	0	0	0	0	0	0
A0A0G2JMW3;A0A0G2JP44;Q9HBB8;Q9HBB8-2;Q9HBB8-4	0	0	0	0	0.59399	0.40601	0	0	0	0	-1
A0A0G2JMX7;A0A0G2JPD5;A0A0G2JQJ7;A0A0G2JS76;P10636;P10636-6;P10636-7;P10636-8;P10636-9
A0A0G2JMZ6;O60282	-0.376876	0	0.550695	0	-0.173819	0	0	0	0	0	0
A0A0G2JMZ8;Q16625	0	0	0.381699	0	0	0	0	0	0	0	-0.381699
A0A0G2JN23;A0A0G2JQ38	0	0	0.680954	0	0	-0.425443	0	0	0	0	-0.25551
A0A0G2JN42;A0A0G2JNJ8;Q6W4X9	0.634685	0	-1	0	0.365315	0	0	0	0	0	0
A0A0G2JN53	0	0	0	0	0	0	0	0	0	0	0
A0A0G2JN84;P59817	-0.344866	0	0	-0.655134	0.603876	0	0	0.396124	0	0	0
A0A0G2JNW7;Q9Y666	0	0.21043	0	0	0	-0.245146	0	0	0	0	0.0347158
A0A0G2JNZ2;A0A669KB89;Q14160	0	0	0	0	0	0	-0.12095	0	0	0	0.12095
A0A0G2JPC8;B4DTC2;E7EPX8;E7ER82;Q8TC27	0	0	0	0	-0.28849	0	0	0.035286	0.253204	0	0
A0A0G2JPZ6;A0A0J9YWU2;Q9H3Q3	0	0.0998307	0	0	0	-0.307235	0	0	0	0.51059	-0.303186
A0A0G2JQ41;A0A1C7CYZ0;B7Z683;Q12979;Q12979-2;Q12979-4	0.0989658	0	0	-0.625098	0.526132	0	0	0	0	0	0
A0A0G2JQC6;A0A0G2JQK9;A0A0G2JRT1;E7EWN1;Q99102-3	0	0	1	0	0	-1	0	0	0	0	0
A0A0G2JRG1
A0A0G2JS52;Q01538;Q01538-2	-0.267273	0	0	0	-0.732727	0	0	0	0.595219	0.404781	0
A0A0J9YVP6;Q9UHX1-2	0	0	0	0	0	0	0	0	0	0	0
A0A0J9YVW4	-0.66211	0	0	0.66211	0	0	0	0	0	0	0
A0A0J9YW18;F6RP06;Q12983	0	0	0	0	0	0	0	0	0	0	0
A0A0J9YW63	-0.304537	0	1	0	0	-0.358748	0	0	0	0	-0.336716
A0A0J9YW64;A6NIW2;Q5JSL3	0	0	0	0	0.248675	0	-0.279563	0.455656	0	-0.325193	-0.099576
A0A0J9YWD2;A0A0J9YX19;A0A0J9YXY6;A0A0J9YYK8;A0A1B0GTJ5;A0A1B0GU79;A0A1B0GUR8;A0A1B0GVR1;Q9UBY8	0	0	0	0	-0.592248	0	0	0	0	0	0.592248
A0A0J9YWD5;A0A0J9YX88;A0A0J9YYB5;B7ZM65;E9PJ24;F8WEF5;Q9P1Y6;Q9P1Y6-2;Q9P1Y6-3	0	0	0	0	0	0	0	0	0	0	0
A0A0J9YWE1;A0A0J9YWN0	0	0	0	0	0.517531	0	0	0	0	-1	0.482469
A0A0J9YWL0;Q9Y4K1	0	0	-1	0	0	0	0	0	0	0	1
A0A0J9YWR7;A0A0J9YXE4;Q8N2F6;Q8N2F6-2;Q8N2F6-3;Q8N2F6-4	0	0	0	0	0	0	0	0	0	0	0
A0A0J9YWV4;O75154;O75154-2;O75154-3;X6RFI8	0	0	0	1	-1	0	0	0	0	0	0
A0A0J9YX34;A0A6Q8PEY7;A0A6Q8PF18;A0A6Q8PF63;A0A6Q8PF74;A0A6Q8PFB0;A0A6Q8PFI4;A0A6Q8PFM2;A0A6Q8PFS5;A0A6Q8PFV0;A0A6Q8PFX3;A0A6Q8PG16;A0A6Q8PGE9;A0A6Q8PGG4;A0A6Q8PGL5;A0A6Q8PH06;A0A6Q8PHE9;A0A6Q8PHG4;A0A6Q8PHP4;A0A6Q8PHR6;C9J084;Q9C040;Q9C040-2	0	0	0.622905	0	0	-0.431214	0.377095	-0.568786	0	0	0
A0A0J9YX62;C9J2C4;O75190;O75190-2;O75190-3
A0A0J9YX66;A0A0J9YXJ0;A0A1B0GU44;A0A1B0GUN8;E9PC62;O95319;O95319-2;O95319-3;O95319-4;O95319-5;Q5VZZ6;V9GYD9	0.258911	0	0.318211	0	-1	0	0	0	0	0	0.422877
A0A0J9YXF2;Q15165;Q15165-1	0	0	0	0	0	0	0	0	0	0	0
A0A0J9YXM6;Q562E7	0	0	0	0	0	0	0	0.310518	-0.310518	0	0
A0A0J9YXN7	0	0	0	0	0	0	0	0	0	0	0
A0A0J9YXT0;H7C5H6;Q9H0F7;Q9H0F7-2	0	0	0	-0.628092	0	0	0	0.385395	0.242698	0	0
A0A0J9YY17;A0A1C7CYW8;A0A669KB38;Q8IVF4	0	0.424106	0	0	0	-1	0.575894	0	0	0	0
A0A0J9YY72;A0A1W2PQQ1;Q5HYW2	0.427968	0	-0.427968	0	0	0	0	0	0	0	0
A0A0J9YYF0	0	0	-0.419311	0	0	0	0	0	0	0.419311	0
A0A0J9YYF7;Q86T65;Q86T65-4	0	0.428005	-0.234821	0	0	0	0	0	0	0.076246	-0.26943
A0A0K0K1A5	0	0	0	0	0	0	0	0.00340073	-0.00340073	0	0
A0A0R4J2E8;D6REM6;P43243	0	0	0	0	0	0	0	0	0	0	0
A0A0R4J2F3;P0DPB6	0	0	0.634945	0	0	0	0	0	-0.634945	0	0
A0A0R4J2F6;Q12894;Q12894-2	0	-0.675834	-0.324166	0	0	0	0	1	0	0	0
A0A0S2Z4L3;A0A3B3ISJ1;G5E9F8;P07225	0	0.0762558	0	0	0	0	0	0	0	0	-0.0762558
A0A0S2Z4L7;O60603	0	0.400038	0	0	0.225672	-0.406554	0	0	0	0	-0.219156
A0A0S2Z4Q7;A0A1W2PQQ6;A0A1W2PQR0;A0A1W2PR45;A0A1W2PRC6;A0A1W2PRD9;A0A1W2PRY1;A0A1X7SBT2;C9JYS9;Q9UNP4;Q9UNP4-2;Q9UNP4-3	0	0	0	0	0	0	0	0	0	0	0
A0A0S2Z5D0;A0A1B0GTU6;H3BUV4;Q9NWW5;Q9NWW5-2	0	0.293097	0	0	0	-0.265216	0	0	0	0	-0.0278815
A0A0U1RQE4;A0A494C1M0;Q5HYK7;Q5HYK7-2;Q5HYK7-3	0	0	0	1	0	0	0	-0.420182	-0.579818	0	0
A0A0U1RQK7
A0A0U1RQK9	0	0	0.559209	0	0.440791	0	0	0	0	-0.556261	-0.443739
A0A0U1RQM0;H0YKX3;H0YMA4;Q15004
A0A0U1RQQ9;Q6P3W7
A0A0U1RQS4;A0A0U1RR93;Q9BYB0;Q9BYB0-3	0.276956	0	0	0	-0.245027	-0.163303	0	0	0	0	0.131374
A0A0U1RQT8;Q8TCZ2;Q8TCZ2-2;Q8TCZ2-3;Q8TCZ2-5	-0.0609103	0.41719	0	0	0	-0.415148	0	0	0	0	0.0588682
A0A0U1RQW6;E7EPU2;Q9Y2E4
A0A0U1RQY4	0.270115	0	-0.673085	0	0	0	0	0	0	0	0.40297
A0A0U1RR06;Q9Y484;Q9Y484-2;Q9Y484-3	-0.241486	0	0	0.241486	0	0	0	0	0	0	0
A0A0U1RR16;A0A3B3IRZ7;Q8NEY4;Q8NEY4-2
A0A0U1RR25	0	0	0	0	0.341032	-0.574889	0	0.247938	0.411029	0	-0.425111
A0A0U1RR27;H3BTW5;Q7Z401;Q7Z401-2	0	0	0	0	0	0	0	0	0	0	0
A0A0U1RR32;A0A0U1RRH7;P0C0S8;P20671;Q96KK5;Q99878;Q9BTM1	0	0	0	0	0	0	0	0	0	0	0
A0A0U1RR76;A6NJ78;A6NJ78-2;A6NJ78-4;P0C7V9	0	0	0	0	0	0	0	0	0	0	0
A0A0U1RRA6;B5MCG9;B5MCU0;H7C0E9;Q9Y2K5	0	0	0	1	0	0	0	-0.394679	-0.605321	0	0
A0A0U1RRB6;J3QT38;Q9Y2D4;Q9Y2D4-2
A0A0U1RRB9;F2Z2V1;Q96C11;Q96C11-3	0	0	0	0	0	0	0	0	0	0	0
A0A0U1RRK1;A0A286YF11;F6XEV2;Q9BPX6;Q9BPX6-3	0	0	0	0	0	0	0	0	0	0	0
A0A0U1RRL7	0	0	-0.369753	0	0	0	0	0	0	0.654727	-0.284974
A0A0U1RRL8;Q8TB22;Q8TB22-2;Q8TB22-3	0	0	0	0	0	0	0	0	0	0	0
A0A126GWB3;P47888	-0.0215509	0	0	0	-0.349029	0	0	0	0	0	0.37058
A0A140LJL2;Q8N350	0.355373	0	0	0	-0.536756	0	0	-0.463244	0.644627	0	0
A0A140T8Y3;A0A140T902;A0A140T9C0;A0A140TA33;A0A140TA41;A0A140TA52;A0A3B3ISX9;P22105;P22105-1;P22105-4	0	0	0	0	0	0	0	0	0	0	0
A0A140T913;A0A140T933;A0A140T955;A0A140T9I0;A0A140T9X5;A0A1W2PRT9;Q53Z42	0	0.173121	0	0	0	-0.221392	0	0	0	0	0.0482709
A0A140T951	0	0.178273	0	0	0	-0.259993	0	0	0	0	0.0817196
A0A140T962;A0A140T9B3;A0A140T9J9;A0A1W2PR11;Q5QT33	0.276809	0.0143667	0	0	0	0	0	0	0	0	-0.291176
A0A140T9G8;Q0P5T2;Q5SQH8;Q5SQH8-2;Q5SQH8-4	0	0	-0.00305165	0	0	0	0	0	0	0.227211	-0.224159
A0A140T9T7;Q03518	0	-0.278028	0	0	0	0	0	0	0	0	0.278028
A0A140TA01;E9PQT8;E9PQZ5;O43189;O43189-2	0.507754	0	-0.277924	0	0	0	0	0.492246	-0.722076	0	0
A0A140TA09;Q99942
A0A182DWF2;A0A182DWF3;Q9NNW7;Q9NNW7-2	0	0	0	0	0	0	0	0	0	0	0
A0A182DWH7;P49908
A0A182DWI4;E9PN30;Q9BQE4	-0.35073	0.517395	0	0	-0.64927	0	0	0	0	0	0.482605
A0A1B0GTB0;A0A1B0GTU8;A0A1B0GU12;A0A1B0GUT7;A0A1B0GVB9;A0A1B0GVC7;A0A1B0GVW0;A0A1B0GWJ8;A0A1C7CYW4;B7Z413;H7C3E1;O75787;O75787-2	0	0.568104	0	0	0	-0.514573	0	0	0	0	-0.0535307
A0A1B0GTF3;A0A6I8PIT5;A0A6I8PIW1;A0A6I8PLB1;O43301	-0.330056	0	0.463008	0	-0.369436	0	0	0	0	0	0.236484
A0A1B0GTG2;A0A1B0GW77;P49419;P49419-2	0	0	0	0	0	0	-0.170902	0	0	0.170902	0
A0A1B0GTJ7;A0A1B0GWJ0;P30566	0	0	0	-0.334798	0	0	0	0	0.334798	0	0
A0A1B0GTJ8;A0A1B0GV63;A0A1B0GVK1;A0A1B0GWJ2;A0A3F2YNW7;A0A6Q8NVI4;H0Y7H8;Q8NFD5;Q8NFD5-2;Q8NFD5-3;Q8NFD5-4	0	0	0	0	0	0	0	0	0	0	0
A0A1B0GTK6
A0A1B0GTM1;A0A1B0GUM5;E7ETX0;Q8NHX9	0	0	0	0	0	0	0	0	0	0	0
A0A1B0GTM3;A0A1B0GUA4;A0A1B0GUH5;A0A1B0GW68;Q13510;Q13510-2
A0A1B0GTT2	0	0	0	0	-1	0	0	0.46858	0	0.53142	0
A0A1B0GTU3;Q96L93;Q96L93-2;Q96L93-4;Q96L93-5;Q96L93-6	-0.444441	0	0	0	0.0405624	0	0	0	0	0	0.403879
A0A1B0GTU4
A0A1B0GTU5;H0Y488;O14497;O14497-2;O14497-3	0	0	0	0	0	0	0	0	0	0	0
A0A1B0GTU7;H0YD36;P54098	0	0	0	0	0	0	0	0	0	0	0
A0A1B0GTV6	0	0	0	0	0	0	0	0	0	0.31565	-0.31565
A0A1B0GTW1;A0A2R8YDH4;A0A3B3ITE1;Q9UDY2;Q9UDY2-3;Q9UDY2-7	0	0	0	0	0	0	0	0	0	0	0
A0A1B0GTX1;A0A1C7CYY6;Q6XZF7;Q6XZF7-2	1	0	-0.403405	0	0	0	0	0	-0.596595	0	0
A0A1B0GUA3;A0A6Q8PGG2;A0A6Q8PH45;A0A6Q8PHL8;Q96EK5	0	0	0	0	-1	0	0	0	1	0	0
A0A1B0GUC2;A0A1W2PP33;C9J7I0	-0.614137	0	0	0	1	-0.385863	0	0	0	0	0
A0A1B0GUF4	1	0	0	0	-1	0	0	0	0	0	0
A0A1B0GUL3	0.562595	0	0	0	-0.562595	0	0	0	0	0	0
A0A1B0GUL6;E9PEZ5;Q9UPP5;Q9UPP5-2
A0A1B0GUN5	0.555709	0	-0.555709	0	0	0	0	0	0	0	0
A0A1B0GUN9
A0A1B0GUS7	0.426058	0	0	0	0	0	0.573942	-0.353468	-0.646532	0	0
A0A1B0GUZ2;P00797;P00797-2	0.466378	0	0	0	0	0	0	0	-0.466378	0	0
A0A1B0GUZ7;Q14156;Q14156-2	0	0.18806	0	0	0	-0.26584	0	0	0	0	0.0777796
A0A1B0GV47;Q7Z4S6;Q7Z4S6-2;Q7Z4S6-4;Q7Z4S6-5;Q7Z4S6-6
A0A1B0GV48;D6RBC4;Q8NAP3	-0.465209	0	0	0	0.519811	-0.534791	0	0	0	0	0.480189
A0A1B0GV71;A0A1B0GW34;A0A1B0GWD3;B4DFF3;H3BNK7;H3BR00;O95086;Q13286;Q13286-2;Q13286-3;Q13286-4;Q13286-5;Q13286-7;Q2TA70;Q9UBD8	0	0	0	0	0.671975	-0.476711	0	0.328025	0	0	-0.523289
A0A1B0GVD5;A0A1B0GVP3;A0A1B0GW44;A0A1B0GWE8;P07339	0	-0.640768	0	0	0	0.640768	0	0	0	0	0
A0A1B0GVG4
A0A1B0GVI7;A0A2R8Y7G1;P35869	0	0	-1	1	0	0	0	0	0	0	0
A0A1B0GVL3;Q05086;Q05086-2;Q05086-3	0	0	0	-0.51269	0	0	0	0	0.51269	0	0
A0A1B0GVV3;Q5EBL4	0	0	0	0	0	0	0	0	0	0	0
A0A1B0GVV8
A0A1B0GW05	0	-0.4372	0	0	0	0	0	0	0	0.4372	0
A0A1B0GW23;Q03154	0	0	0	0	0	0	0	0	0	0	0
A0A1B0GW38
A0A1B0GW41;E9PEN0;Q8WYH8;Q8WYH8-2	0	0	0	0	0	0	0	0	0	0	0
A0A1B0GWB2	0.164962	0	0.402911	0	0	-1	0	0	0	0	0.432127
A0A1B0GWD8;Q9C093-4
A0A1B0GWI2;O75503	0	0	1	0	0	-0.274705	0	0	0	-0.437453	-0.287841
A0A1C7CYX0	0	0.178573	0	0	0	-0.297223	0	0	0	0	0.11865
A0A1C7CYX9	0	0	0	0	0	0	0	0	0	0	0
A0A1D5RMN4;P23945;P23945-2;P23945-4
A0A1P0AYU5;Q9BWM7	0	0	0	0	0	0	0	0	0	0	0
A0A1W2PNF0;A0A1W2PNY6;A0A1W2PPE6;A0A1W2PPG9;A0A1W2PPH4;A0A1W2PQ13;A0A1W2PQ60;A0A1W2PQD6;A0A1W2PQH2;A0A1W2PQL8;A0A1W2PR66;A0A1W2PRN3;A0A1W2PRT7;A0A1W2PS45;A0A1W2PS77;A0A1W2PSA9;A0A1W2PSD1;Q9Y2D2;Q9Y2D2-2;Q9Y2D2-3	0	0.546769	0	0	0	0	0	0	0	-0.546769	0
A0A1W2PNH8;A0A1W2PNQ8;A0A1W2PNR0;A0A1W2PNW5;A0A1W2PPB6;A0A1W2PPR7;A0A1W2PQA9;A0A1W2PQP4;A0A1W2PQZ1;A0A1W2PS19;K7ELE1;K7EPJ2;O95427	-0.363208	0	0	0	-0.636792	0	0.542629	0	0	0	0.457371
A0A1W2PNP0;Q969N2;Q969N2-5	0	-0.229295	0	0	0	0	0	0	0	0	0.229295
A0A1W2PNR9;Q9Y5U9	0	0	0	0	-0.0760976	-0.409641	0	0	0	0	0.485739
A0A1W2PNT1	0	0	-0.277533	0	0.392888	0	0	0.22493	-0.340285	0	0
A0A1W2PNU4;A0A286YES2;F8VYC4;P0DJD0;P0DJD1	0	0	-0.0889621	0	0	0	0	0	0	0.0889621	0
A0A1W2PNV4	0	0	0	0.407469	0	0	0	0	-0.407469	0	0
A0A1W2PNW1;A0A494C0T4;H0YJH6;P42226;P42226-3	0	0	0	0	0	0	0	0	0	0	0
A0A1W2PNX8;Q9H3U1;Q9H3U1-2	0	0	0	0	0	0	0	0	0	0	0
A0A1W2PNY5;A0A1W2PPP6;A0A1W2PQA7;A0A1W2PQZ6;A0A1W2PR08;A0A1W2PRF0;A0A1W2PRF5;A0A1W2PRJ0;A0A1W2PS93;A0A1X7SBS0;G5E9D4;Q96EB1;Q96EB1-2;Q96EB1-3	0.366479	0	-0.265016	0	0.633521	0	0	0	-0.734984	0	0
A0A1W2PNZ9;H7BXU7;Q15652;Q15652-3	0.409064	0	0	0	0	0	0.590936	-1	0	0	0
A0A1W2PP04;Q5JY83;Q9Y388	0	0	-0.374001	0	0	0	0	0	0	0	0.374001
A0A1W2PP11;Q9H300	0	0	0	0	0	0	0.370219	0	0	-0.370219	0
A0A1W2PPB7;E9PH70;H0Y8E4;Q9ULH0;Q9ULH0-2;Q9ULH0-4	0	0.163249	0	0	0	-0.262992	0	0	0	0	0.0997426
A0A1W2PPC6;Q9H3H5;Q9H3H5-2	0	0	0	0	0	0	0	0	0	0	0
A0A1W2PPD8	1	0	0	0	-1	0	0	0	0	0	0
A0A1W2PPH1;P23368	0	0	0	0	0	0	0	0	0	0	0
A0A1W2PPH6	0	0	0.206976	0	0	0	0	0	0	-0.206976	0
A0A1W2PPI5;Q5JSJ4	0	0	-0.563724	0	0.587416	-0.436276	0	0	0	0	0.412584
A0A1W2PPJ5;J3QT51;J3QT87;Q96SW2;Q96SW2-2
A0A1W2PPS1;Q00839;Q00839-2	0	0	0	0	0	0	0	0	0	0	0
A0A1W2PPV0;A0A1W2PQG5;Q9Y5P2;Q9Y5P2-2	0.329615	0	0	0	0.173871	-0.265398	0	-0.238088	0	0	0
A0A1W2PPZ5;P23193	0	0	0	0	0	0	0	0	0	0	0
A0A1W2PQ75;O15488;O15488-2;O15488-3;O15488-4;O15488-6	0	0	0.235326	0	0	0	0	0	0	-0.235326	0
A0A1W2PQD2;Q9UBB4	0	0	0	0.409693	0	0	0	0	-0.409693	0	0
A0A1W2PQE7	0.193732	0	0	0	0	-0.287525	0.428973	0	0	-0.450051	0.114871
A0A1W2PQM2	0.39474	0	-0.39474	0	0	0	0	0	0	0	0
A0A1W2PQM3	0	-0.544786	0	0	0.281975	0.262812	0	0	0	0	0
A0A1W2PQM5;A0A1W2PR19;A0A1W2PRG0
A0A1W2PQP6;Q9BWL3;Q9BWL3-2;Q9BWL3-3;Q9BWL3-4;Q9BWL3-5;X6R6F3;X6R6S3	0	0	-0.218095	0	0	-0.322251	0	0	0	0	0.540346
A0A1W2PQQ5	0.374841	0	0	0	0	-0.286213	0	0	0	0.0356548	-0.124282
A0A1W2PQS6	0	0.378195	0	0	0	0	0.302985	0	0	-0.68118	0
A0A1W2PR09;A0A1W2PRL5;A0A1W2PRM0;F5GYH1;Q8NC96
A0A1W2PR17;F2Z2I2;Q16875;Q16875-2;Q16875-3;Q16875-4;Q5VX20;Q5W015	0	0	0	-0.340964	0	0	0	0	0.340964	0	0
A0A1W2PR28;A0A1W2PRJ5;A0A6Q8PFR7;Q5JU85;Q5JU85-3	0	0	0	0	-0.659847	0	0	-0.0696325	0.729479	0	0
A0A1W2PR46;A0A1X7SBR3;P14136;P14136-2;P14136-3	0	0	-0.405046	0	0	0	0	0	0	0.292907	0.112139
A0A1W2PRB8	-0.214009	0	0.473706	0	0	0	0	0	0	0	-0.259697
A0A1W2PRI9;E9PNW5	-0.1025	0.554442	0	0	-0.451941	0	0	0	0	0	0
A0A1W2PRW4;P53816
A0A1W2PS05;Q8NEB9	0	0	0	0	0	0	0	0.294014	-0.294014	0	0
A0A1W2PS43;Q14108	0	-0.525686	0	0	0	0.759751	0	0	0	0	-0.234065
A0A1W2PS52	0.600535	0	0	0	0	0.0468446	0	-0.329084	0	-0.318296	0
A0A1W2PS94;A0A2R8Y358;Q9BXT5	0	0	0	0	0	0	0	0.380099	-0.380099	0	0
A0A1X7SBT1;Q9H1D0;Q9H1D0-2	0	0	0.392025	0	0	0	0	0	0	-0.392025	0
A0A1X7SBY3;H0Y860;Q9P246;Q9P246-2	-0.377516	0	0.299789	0	-0.275256	0	0	0	0	0	0.352983
A0A1X7SBZ2;A0A5H1ZRQ2;Q92841	0	-0.158781	0.158781	0	0	0	0	0	0	0	0
A0A1Y0BRN3;A0A590UJ40
A0A286YEV4;A0A286YEV9;A0A286YEW8;A0A286YEX1;A0A286YF00;A0A286YF45;A0A286YF51;A0A286YF73;A0A286YFC6;A0A286YFE7;A0A286YFF5;A0A286YFH9;A0A286YFM2;B7Z2B2;E7ERQ4;Q8NHS3	0	0	0	0	-0.288356	0	0	0.288356	0	0	0
A0A286YEX4;P08651;P08651-5;P08651-6	0	0	0	0	0	0	0	0	0	0	0
A0A286YF17;A0A286YFD0;P42898;P42898-2;Q5SNW7	0	0	0	0	0	0	0	0	0	0	0
A0A286YF22;O43175	0	0	0	0	0	0	0	0	0	0	0
A0A286YF37;Q9UK22	0	0	0	1	0	0	0	-1	0	0	0
A0A286YFA5;Q8NGQ1	0.348685	0	0	0	-1	0	0	0	0	0	0.651315
A0A286YFE3;A0A286YFF7;A0A286YFL8;A0A2C9F2P4;P50897;Q5T0S4	0	-0.441877	0	0	0	0.703071	0	0	0	0	-0.261195
A0A286YFF8;Q7Z3U7;Q7Z3U7-2;Q7Z3U7-5;Q7Z3U7-6	0	0	0	-0.35569	0	0	0	0	0.35569	0	0
A0A2Q2TTZ9;P01593;P01594	-1	0	0.73742	0	0	0	0	0	0	0	0.26258
A0A2Q3DQE3;Q13555;Q13555-10;Q13555-11;Q13555-2;Q13555-3;Q13555-4;Q13555-5;Q13555-6;Q13555-7;Q13555-8;Q13555-9;Q5SWX3;Q8WU40	0	0	0.418433	0	0	0	0	-0.418433	0	0	0
A0A2R8Y2A8
A0A2R8Y2F6;P42336	0	0	-0.603233	0	0	0	0.566367	0	0	0.0368668	0
A0A2R8Y3M9	0	-0.322977	0	0	0	0.322977	0	0	0	0	0
A0A2R8Y3N3;A0A2R8Y5P7;A0A2R8Y6I1;P49590;P49590-2	0	0	0	0	0	0	0	0	0	0	0
A0A2R8Y3S0;A0A2R8Y511;A0A2R8YCL0;Q96JX3	0	0	0.383883	0	0	0	-0.431987	0	0	0.0481044	0
A0A2R8Y440;A0A2R8Y4P4;A0A2R8Y7S2;A0A2R8YG32;A0A2R8YGG3;P51532;P51532-2;P51532-3;P51532-4;P51532-5;Q9HBD4	0	0	0	0	0	0	0	0	0	0	0
A0A2R8Y455;A0A2R8Y600;A0A2R8Y620;A0A2R8Y7U2;Q86VX2;Q86VX2-2	0	0	0	0	0.463919	0	0	-0.463919	0	0	0
A0A2R8Y471;Q12967;Q12967-2;Q12967-3;Q12967-4;Q12967-5;Q12967-6;Q5T7U6	0	0	-0.637386	0	-0.362614	0	0	0	0	1	0
A0A2R8Y478;A6NNI4;G8JLH6;P21926	-1	0	0	0	1	0	0	0	0	0	0
A0A2R8Y484;Q08722;Q08722-2;Q08722-3;Q08722-4	-1	0.479964	0	0	0.20918	0	0	0	0	0	0.310856
A0A2R8Y491;E7EWD9;O95718;O95718-1;O95718-2	0	0	1	-1	0	0	0	0	0	0	0
A0A2R8Y4C2;A0A2R8Y596;A0A2R8Y5C9;A0A2R8Y5E4;A0A2R8Y6M6;A0A2R8Y8C4;A0A2R8YFK2;A0A2R8YFS8;P56945;P56945-2;P56945-3;P56945-4;P56945-5;P56945-6;P56945-7;P56945-8	0	0	0	0	0	0	0	0	0	0	0
A0A2R8Y4F5	1	0	0	0	-0.421147	0	0	0	-0.578853	0	0
A0A2R8Y4I8;A0A2R8Y7K2;A0A2U3TZR0;Q9UBP0;Q9UBP0-2;Q9UBP0-3;Q9UBP0-4
A0A2R8Y4K2;Q9Y2S2	0	0	0	0	0	0	0	0	0	0	0
A0A2R8Y4M1;A0A2R8Y615;A0A2R8YGW2;A0A5F9ZHK1;Q9NZA1;Q9NZA1-2;Q9NZA1-3	0.16399	0.369978	0	0	0	-0.394626	0	0	0	0	-0.139341
A0A2R8Y4T1	0	0	0.357857	0	0	0	-0.357857	0	0	0	0
A0A2R8Y4U1;A0A2R8YDF7;O75164	0	0	0	0	0	0	0	0	0	0	0
A0A2R8Y4U4	-0.187963	0	0.286939	0	0.062613	-0.310907	0	0	0	0	0.149318
A0A2R8Y4V0;A0A2R8Y4Z4;A0A2R8Y5D8;A0A2R8Y6Q0;A0A2R8YDG0;Q09428;Q09428-2	0	0	0	0	0	0	0.671594	0	0	-1	0.328406
A0A2R8Y4W0	0	0	0	0	0	-0.244921	0.300591	0	0	-0.0748056	0.0191364
A0A2R8Y4W1;A0A2R8Y860;A0A2R8YD46;A0A2R8YFE3;A0A2U3TZS7;P43004;P43004-2	0	-0.0041938	0	0	0	-0.249926	0.249199	0	0	0	0.00492111
A0A2R8Y4W2;A0A2R8YE63;Q12929	0	0	1	-1	0	0	0	0	0	0	0
A0A2R8Y4Y7;A0A2R8YFW4;Q9UQ90	0	0	0	0	0	0	0	0	0	0	0
A0A2R8Y4Z0;A0A2R8Y7W5;A0A2R8YF61;Q14004;Q14004-2	0	0	0	0	0	0	0	0	0	0	0
A0A2R8Y4Z8	0	0	-0.0315669	0	0	0.504318	0	-0.472751	0	0	0
A0A2R8Y524;A0A2R8YEC9;E9PFW2;O00462	0	0	0.399903	0	0	0.600097	-1	0	0	0	0
A0A2R8Y543;A0A2R8Y5A3;A0A2R8Y804;A0A2R8YCH5;B4DGU4;P35222	0	0	0.42935	0	0	-0.400055	0	0	0	0	-0.0292951
A0A2R8Y544;Q9BR61	0	0	0	0.363193	0	0	0	0	-0.363193	0	0
A0A2R8Y549;Q8NI35;Q8NI35-2;Q8NI35-3;Q8NI35-4
A0A2R8Y566;Q9P260-2	0	0	0	0	0	0	0	0	0	0	0
A0A2R8Y595;A0A2R8YFL0;P49711	0	0	0	0	0	0	0	0	0	0	0
A0A2R8Y5A0;A0A2R8YD58;E7EU96;P68400	0	0	0	0	0	0	0	0	0	0	0
A0A2R8Y5D3;A0A2R8YEZ4;O15160;O15160-2	0	0	0.587843	0	0	0	0	0	-0.587843	0	0
A0A2R8Y5F1;A0A2R8Y7C8;A0A2R8Y7X5;A0A2R8YDR3;A0A2R8YDZ2;A0A2R8YGD6;A0A2R8YGU4;H3BMQ0;P49815;P49815-2;P49815-3;P49815-4;P49815-5;P49815-6;P49815-7;X5D2U8
A0A2R8Y5J4;Q9BYG8	0	0	0.348917	0	-0.669361	0	0	0.320445	0	0	0
A0A2R8Y5K2;Q96LT7	0	0	-0.386499	0	0	1	0	0	-0.613501	0	0
A0A2R8Y5N2;A0A2R8Y5S3;A0A2R8YFV7;Q92574;Q92574-2	0	0	0.252572	0	0	0	0	0	0	-0.252572	0
A0A2R8Y5P9;Q8TF72
A0A2R8Y5Q8;A0A2R8YHI9;Q15813;Q15813-2
A0A2R8Y5Y7;D6RAN4;P32969	0	0.112488	0	0	0	0	0	0	0	-0.112488	0
A0A2R8Y605
A0A2R8Y635;A0A2R8YDN7;Q9H7F0;Q9H7F0-2	-0.0129506	0	-0.0273697	0	0.537929	-0.258749	0	0	0	0	-0.238859
A0A2R8Y640	0	0	1	0	0	0	0	-1	0	0	0
A0A2R8Y648	0	0	0	0	0	0	0	0	0	0	0
A0A2R8Y653;Q9BZX2	0	0	-1	1	0	0	0	0	0	0	0
A0A2R8Y661;A0A2R8YGD3;Q9Y4G8
A0A2R8Y6D0	0	0	0	0	0	-0.254246	0.0293056	0	0	0	0.224941
A0A2R8Y6I6;A0A2R8Y6L5;A0A2R8YDF3;Q13627;Q13627-2;Q13627-3;Q13627-4;Q13627-5	0	0	0	0	0	0	0	0	0	0	0
A0A2R8Y6P2;A0A2R8YDC4;A6NFE3;C9J654;J3KR48;J3KR52	0	0	0	0	-0.621459	0	0	0	0.621459	0	0
A0A2R8Y6W8;P19447	0	0	0.0514765	0	0	0	0	0	0	0	-0.0514765
A0A2R8Y6Y7;A0A2R8YDQ9;Q9P2R7;Q9P2R7-2	0	0	0	0	0	0	0	0	0	0	0
A0A2R8Y783	0.2133	0	0	0	0	-0.357052	0	0	0	0	0.143752
A0A2R8Y7B4	0	0	0	0	-0.0175741	0	0	0	0.0175741	0	0
A0A2R8Y7D5	0.163203	0	0.26237	0	-0.522466	-0.477534	0	0	0	0.574427	0
A0A2R8Y7E6;A0A5F9ZHX3;A0A5F9ZI57	0	0.548541	0	0	-1	0	0	0	0	0	0.451459
A0A2R8Y7I9;A0A2R8Y855;A0A2U3TZQ7;B4DGM3;J3QKS7;Q969G3;Q969G3-2;Q969G3-4;Q969G3-5	0	0	0	0	0	0	0	0	0	0	0
A0A2R8Y7P6;A0A5F9ZHW5;F8VQP2;Q99700;Q99700-4;V9GY86
A0A2R8Y7Q1;E7ETD6;E9PE19;F5GXF5;Q12830;Q12830-2;Q12830-4	0	0	0	0	0	0	0	0	0	0	0
A0A2R8Y7R4;B2RUZ4;H3BS66	0	0	0.442762	0	0	0.557238	0	-1	0	0	0
A0A2R8Y7T6;A0A3B3IRZ4;Q6DN90;Q6DN90-3
A0A2R8Y7U0;H0Y770;O75140;O75140-1;O75140-4;O75140-9
A0A2R8Y7V5;H0Y850;P38398;P38398-4;P38398-7;P38398-8;Q5YLB2
A0A2R8Y7X9;P69891;P69892	0.374372	0	-0.512074	0	0.304675	0	0	0	0	0	-0.166972
A0A2R8Y7Y4;Q8N8A2;Q8N8A2-2;Q8N8A2-4	0	0	0	-0.487774	0	0	0	0	0.487774	0	0
A0A2R8Y811;P62263	0	-0.0379774	0	0	0	0	0.398047	0	0	-0.360069	0
A0A2R8Y840;Q9HCK8;Q9HCK8-2	0	0	0	0	0	0	0	0	0	0	0
A0A2R8Y849;A0A2R8Y8A0;A0A2R8YD14;E7ETK0;P62847;P62847-2;P62847-3;P62847-4	0	0.356976	0	0	0	0	0.374574	0	0	-0.73155	0
A0A2R8Y851;P62273;P62273-2	0	0.44944	0	0	0	0	0	0	0	-0.44944	0
A0A2R8Y852;A0A2R8YDI1;P39880;P39880-2;P39880-3;P39880-4;P39880-5;P39880-6	0	0	0	0	0.609979	-0.339202	0	-0.270777	0	0	0
A0A2R8Y880;Q7Z6E9;Q7Z6E9-2	0	0	-0.517873	0	0.228012	0	0	0	0	0	0.289861
A0A2R8Y8E0;A0A2U3TZI2;H7C560;P15056	0	0	0	0	0	0	0	0	0	0	0
A0A2R8YCJ8;Q5T2H3;Q9NVV5;Q9NVV5-1;Q9NVV5-3
A0A2R8YCL1;Q13322;Q13322-3;Q13322-4
A0A2R8YCS7;Q9Y3Z3
A0A2R8YD30;P11171;P11171-2;P11171-3;P11171-4;Q4VB86	0	0	0	0	0	0	0	0	0	0	0
A0A2R8YD63;Q92547
A0A2R8YD85;Q96BY6;Q96BY6-3	0	0	0	0	1	-0.584642	0	0	0	0	-0.415358
A0A2R8YDB8;H7BXF5;Q9H0E3;Q9H0E3-3	0	0	0	0	0	0	0	0	0	0	0
A0A2R8YDD5;P30531	0	0.60518	0	0	0	0	0	0	0	0	-0.60518
A0A2R8YDI5;O94823;O94823-2;O94823-3	0.18305	0	0	0	0	0	0	0	0	0.225781	-0.408831
A0A2R8YDL0;O75443
A0A2R8YDQ0;Q9H267
A0A2R8YDR8;Q9BZD2;Q9BZD2-2	-0.31034	0	0.337899	0	0.134279	0	0	0.230617	0	-0.392455	0
A0A2R8YDT1;P15104	0	0	0	0.0234512	0	0	0	0	-0.0234512	0	0
A0A2R8YE10;Q9NRW7	0	0	0	0	0.292042	0.353326	0	-0.645368	0	0	0
A0A2R8YE69;P0CG41;Q8IX94	0.57917	0	0.42083	0	-1	0	0	0	0	0	0
A0A2R8YE77;A0A2U3TZM1;O14936;O14936-3	0	0.37692	0	0	0	0	-0.25251	0	0	0	-0.12441
A0A2R8YEA1;B5MCJ9;O15016;O15016-2	0	0	0	0	-1	0	0	0	0	1	0
A0A2R8YEH1	0.665152	0	0	0	0	0	0	0	-0.665152	0	0
A0A2R8YEI5;P52757;P52757-9	0	0	0	0.624428	0	0	0	0	-0.624428	0	0
A0A2R8YEL6
A0A2R8YEM2;D6RG18;D6RHI7;P51946	0	0	-1	0	0.671754	0	0	0	0	0	0.328246
A0A2R8YEM9;O15050	1	0	0	-0.589004	0	0	0	0	-0.410996	0	0
A0A2R8YEZ0;B7WP89;Q0P651;Q0P651-2;Q0P651-3;Q0P651-4	0	0	0	0	0	0	-0.299578	0	0	0.299578	0
A0A2R8YF49
A0A2R8YF72;A0A3B3IRF0;A0A3B3IRT9;A0A3B3IRX5;A0A3B3ISI4;A0A3B3ISW5;A0A3B3ITJ8;A0A3B3ITL3;A0A3B3ITS6;A0A3B3IUE2;H7BYU4;Q9UL68;Q9UL68-4	0	0	0	0	0	-0.271052	-0.359199	0	0	0.630251	0
A0A2R8YFG2;Q96T66	0	0	0	0	0	0	0	0	0	0	0
A0A2R8YFH5;Q15437	0	0	0	0	0	0	0	0.0194355	-0.0194355	0	0
A0A2R8YFN3;A1Z1Q3;A1Z1Q3-1	0.173387	0	0	-0.173387	0	0	0	0	0	0	0
A0A2R8YFN7	0	0	0	0	-0.347828	0.347828	0	0	0	0	0
A0A2R8YFW3;O60907;O60907-2	0	0	0.694256	-0.694256	0	0	0	0	0	0	0
A0A2R8YG42;B1ALK7;Q14155-1;Q14155-5	0	0	0	0	0	0	0	-0.0153803	0.0153803	0	0
A0A2R8YGH5;H7C1E4;P61966	0	0	0	0	0.0150203	0.415031	0	-0.430051	0	0	0
A0A2R8YGW0;P51795;P51795-1	0	0	0	0	-0.270736	0	0	0.270736	0	0	0
A0A2R8YHG5;Q9BZV2	0	0	0	0	0.396206	-0.485055	0	0	0	0	0.0888494
A0A2U3TZH3;Q05639
A0A2U3TZK7	0	0	-0.231881	0	0	0	0	0	0	0.231881	0
A0A2U3TZL5;E9PNW4;P13987;P13987-2	0	0.419879	0	0	0	0.25993	0	0	0	0	-0.679808
A0A2U3TZT9	0.609912	0	0	0	-0.37689	-0.233022	0	0	0	0	0
A0A2U3TZU2;P06744	0	0	0	0	0	0	0	0	0	0	0
A0A2U3TZV8;Q4KWH8;Q4KWH8-2;Q4KWH8-3;Q4KWH8-4	0	1	0	0	-0.516288	0	0	0	0	0	-0.483712
A0A2Y9D025;P56556;R4GN43	0	0	0	0	0	0	0	0	0	0	0
A0A384DVU0;Q8IY17;Q8IY17-2;Q8IY17-3	0.316506	0.0528747	0	0	0	0	0	0	0	0	-0.36938
A0A3B3IRE4;Q8TCE6;Q8TCE6-2	0	0	0	0	0.0365274	0	0	-0.0365274	0	0	0
A0A3B3IRI9;A0A3B3IRJ3;A0A3B3IRV1;A0A3B3IRZ0;A0A3B3IS37;A0A3B3IS68;A0A3B3ISJ4;A0A3B3IT04;A0A3B3IT30;A0A3B3ITZ3;A0A3B3IU52;A6NFW1;A6NGJ7;Q9BY41;Q9BY41-4	0	0	0	-1	0	0	0.446438	0	0.553562	0	0
A0A3B3IRJ9;Q9Y2H2	-1	0	0	0	0	0	0	0.352324	0.647676	0	0
A0A3B3IRK5;Q9H2D1	0	0	0.198735	0	0.231396	0	0	0	0	-0.189755	-0.240376
A0A3B3IRL2;O75629	0	0	0	0	0	0	0	0	0	0	0
A0A3B3IRL5;C9J381;P20839;P20839-2;P20839-3;P20839-4;P20839-5;P20839-6;P20839-7	0	0	0	0	0	0	0	0.373233	-0.373233	0	0
A0A3B3IRN8;A0A3B3ITX0;P24311	0	0	0	0	0	0	0	0	0	0	0
A0A3B3IRP9	-0.201771	0	0	0	0.510794	-0.309023	0	0	0	0	0
A0A3B3IRR1;A0A3F2YNY7;P08397;P08397-2	0	0	0	0	0	0	0	0	0	0	0
A0A3B3IRS4;A0A3B3IRX3;A0A3B3IS46;H0YHC1;Q71F56	-0.222598	0	0	0	-0.037837	0	0	0.260435	0	0	0
A0A3B3IRT8;C9IZQ1;C9J3L8;C9J5W0;E9PAL7;P43307	0	0	0	0	0	0	0	0	0	0	0
A0A3B3IRU6;A0A3B3ISL2;Q9GZU2;Q9GZU2-2;Q9GZU2-4	0	0	0.66237	0	-0.66237	0	0	0	0	0	0
A0A3B3IRY8	-0.667985	0	0	0	0	0	0.46086	0	0	-0.0393786	0.246504
A0A3B3IRZ5;Q8IYE1	0	0	0.340531	0	0	0	0	0	0	-0.340531	0
A0A3B3IS06;E7ETY2;Q13428-3;Q13428-7;Q13428-8	0	0	0	0	0	0	0	0	0	0	0
A0A3B3IS13
A0A3B3IS24;C9JIR6;O75688;O75688-2;O75688-4	0	0	0.20244	-0.20244	0	0	0	0	0	0	0
A0A3B3IS40;A0A3B3ISE6;A0A3B3IT25;A0A3B3ITA8;A0A3B3ITA9;A0A3B3ITE7;A0A3B3ITJ7;B3KV94;Q9UGL1;Q9UGL1-2	-1	0	1	0	0	0	0	0	0	0	0
A0A3B3IS62;A0A3B3ITD6;A0A3B3ITI5;Q9Y672;S4R350	0	0.695977	0	0	0	-0.382011	0	0	0	-0.000959169	-0.313007
A0A3B3IS71;P06400	0	0	0	0	0	0	0	0	0	0	0
A0A3B3IS75;K7EIP0;K7EJD9;K7ESF2;P13686
A0A3B3ISF0;Q659C4;Q659C4-2	0	0	0	0	0	0	0	0	0	0	0
A0A3B3ISF9;P42892;P42892-2;P42892-3;P42892-4	0	0	0	0	0	1	0	-1	0	0	0
A0A3B3ISG5;P14735	0	0	0	0	0	0	0	0	0	0	0
A0A3B3ISG8	0	0	0	0	0	0	0	0	0	0	0
A0A3B3ISH6;Q86U38;Q86U38-2	0	0	0.287106	0	0	-0.287106	0	0	0	0	0
A0A3B3ISJ2;Q96KQ4	0	0	-0.423019	0	0	0	0.423019	0	0	0	0
A0A3B3ISK7;Q6PI48	0	0	0	0	0	0	0	0	0	0	0
A0A3B3ISP1;A0A3B3ITU5;Q92625;Q92625-2
A0A3B3ISQ4;Q9H6S3	0	0	0	0	0	0	0	0	0	0	0
A0A3B3ISR2;B4DPQ0;P00736
A0A3B3ISR7;E9PIF2;Q13206	0	0	0.197569	0	0	0	0	0	0	0	-0.197569
A0A3B3ISS6	0	0	-0.502573	0	0	0	0	0	0	0	0.502573
A0A3B3IST1;B5MD23;O75954	0	0.477577	0	0	0	-0.27641	0	0	0	-0.325677	0.12451
A0A3B3ISU0;Q02487	0	0	0.00752829	0	0	-0.331282	0	0	0	0	0.323754
A0A3B3ISV3;P02462	0	0	0.0226507	0	0	0	0	0	0	-0.0226507	0
A0A3B3ISV4	0	0.541862	0	0	-0.541862	0	0	0	0	0	0
A0A3B3ISV5;Q8N9N7
A0A3B3ISV8;A0A6Q8PF19;A0A6Q8PFS9;A0A6Q8PHH0;Q8IZF0	-0.210333	0	1	0	-0.37839	0	0	0	0	0	-0.411277
A0A3B3ISV9;O43414
A0A3B3IT21	0	0	0.442101	0	0	-0.390574	0	0	0	0	-0.0515262
A0A3B3IT28;A0A3B3ITE5;A0A3B3ITF7;A0A3B3ITW6;A0A3B3IU40;A0A3B3IUA1;A0A3F2YNW9;Q12756;Q12756-2;Q12756-3	0	0	0	0	0	0	0	0	0.629475	-0.629475	0
A0A3B3IT31;Q9NUN5;Q9NUN5-3	0	-0.428677	0	0	-0.195546	0.329821	0	0.294402	0	0	0
A0A3B3IT37;Q5SXQ3;Q5SXQ5;Q8IYK4	0.637813	0	0	0	0	-0.221637	0	0	0	-0.525127	0.10895
A0A3B3IT92;P33991
A0A3B3ITH3;Q9P2X3	0	0	0	0	0	0	0	0	0	0	0
A0A3B3ITK0;P35442	0	0	0	0	0	0	0	0	0	0	0
A0A3B3ITN0;Q86TP1	0	0	0	0	0	0	0	0	0	0	0
A0A3B3ITN6;D6RBB0;O60683;O60683-2	0	0	0	0	0	0	-0.0594676	0	0	-0.205102	0.264569
A0A3B3ITP4;Q495G5;Q8IVH4	0	0	0	0	0	0	0	0	0	0	0
A0A3B3ITT1
A0A3B3ITT5;P47914	0	-0.148949	0	0	0	0	0	0	0	0.148949	0
A0A3B3ITU8;A0A3B3IU04;A0A3F2YNW8;Q14643;Q14643-2;Q14643-3;Q14643-4;Q14643-5;Q14643-6;Q14643-7;Q14643-8	0	0.304251	0	0	0	0	0	0	0	0	-0.304251
A0A3B3ITW1;P49841;P49841-2	0	0	0	0	0	0	0	0	0	0	0
A0A3B3IU42;G5EA29;H0YDP6;H0YEL0;O14893;O14893-2;O14893-3	0	0	0	0	0	0	0	0.658122	-0.658122	0	0
A0A3B3IU65;A9UHW6;A9UHW6-2;A9UHW6-3;J3KSU6;J3QLD1;J3QLJ5;J3QRZ6	0	0	0	0	0	0	0	-0.123789	0.123789	0	0
A0A3B3IU69;F8W717;O00423;O00423-3	0	0	0	0	0	0	0	0.42421	-0.42421	0	0
A0A3B3IUA2;B1AHD1;P55769	0	0	0	0	0	0	0	0	0	0	0
A0A3B3IUB1;Q13144	0	0	-0.351252	0	0	0	0	0	0.351252	0	0
A0A3B3IUB5;Q8TCT9;Q8TCT9-5	0	0	0	0	0	0	0	0	0	0	0
A0A3B3IUC4;A0A6Q8PFA9;P06280	0	0	0.711456	0	0	0	0	0	0	-0.711456	0
A0A3B3IUD2;Q9BUK6;Q9BUK6-2;Q9BUK6-3;Q9BUK6-7	0	0	0	0	0	0	0	0	0	0	0
A0A3B3IUD4;P21453	0.40927	0	0	0	0	-0.595591	0	0	0	0	0.18632
A0A3B3IUD7;Q14690	0	0	0.346414	0	0	0	0	0	0	0	-0.346414
A0A494BWY4;Q6IEE7	-0.612983	0	0	0	0	0	0	0	0	0	0.612983
A0A494BXY3;E9PLD3;E9PRG8	0	0	0.118025	0	-0.471079	0	0	-0.278517	0	0	0.631571
A0A494BZU6;A0A494BZW7;A0A494C002;A0A494C0P9;A0A494C0Q2;A0A494C0Q6;A0A494C0W0;A0A494C156;A0A494C1K5;A0A494C1N1;O95453;O95453-2	0	0	-0.582942	0	0	0	0	0	0.582942	0	0
A0A494BZV4;A0A494C069;Q08AG5	0	0	0	0	0	-1	0	0	0	1	0
A0A494C028;H0Y993;P35659	0	0	0	0	0	0	0	0	0	0	0
A0A494C039	-0.312286	0	0	0	-0.405922	-0.281792	0	0	0	0	1
A0A494C066;B7Z4W5;Q16773	0	0	0	0	0	0	0	0	0	0	0
A0A494C068;A0A494C1K7;E9PGP6;Q9UGJ0;Q9UGJ0-2;Q9UGJ0-3
A0A494C0J7;Q08188	0	0	0.643478	0	0	0	-0.323833	0	0	-0.319645	0
A0A494C0K7;A0A494C0P0;Q6P2C8;Q6P2C8-2	0	0	0.22105	0	0	0	0	0	0	0	-0.22105
A0A494C0M1;P52701	0	0	0	0	0	0	0	0	0	0	0
A0A494C0M2;O95925-3;Q9BQY6;Q9BQY6-2	0.642211	0	0	0	-0.338614	-0.308297	0	0.00469985	0	0	0
A0A494C0N4;H9KV93;Q7Z4L5	0	0	0	0	1	-0.549221	0	-0.450779	0	0	0
A0A494C0P1;P04150;P04150-10;P04150-2;P04150-3;P04150-6;P04150-8;P04150-9	0	0	0	0	0	0	0	0	0	0	0
A0A494C0Q3	0.0119847	0	0	0	-0.0119847	0	0	0	0	0	0
A0A494C0R8	0	0	0	0	0	0	0	0.0169501	-0.0169501	0	0
A0A494C0X7;D3DSM0;P05107	0	0.174493	0	0	0	-0.219223	0	0	0	0	0.0447291
A0A494C0Z5;Q9H082	0.108434	-0.664849	0.556415	0	0	0	0	0	0	0	0
A0A494C105;Q9H3U5;Q9H3U5-3;Q9H3U5-5;Q9H3U5-6	0	-0.468634	0	0	0.32204	0.0837883	0	0.327764	0	0	-0.264959
A0A494C108;Q8N9T8	0	0	0	0	0	0	0	0	0	0	0
A0A494C115;A0A494C1U4;K7N7A8;P29972;P29972-2;P29972-3;P29972-4	-0.276911	0.680184	0	0	0	-0.277956	0	0	0	0	-0.125317
A0A494C143;Q14689;Q14689-6	1	0	-1	0	0	0	0	0	0	0	0
A0A494C146;P50336	0	0	0	0	0	0	0	0	0	0	0
A0A494C164;P52630;P52630-4	0	0	0	-0.0547195	0	0	0	0	0.0547195	0	0
A0A494C165;K7ES25;P12955	0	0	0	0	0	0	0	0	0	0	0
A0A494C167;Q9UHD2	0	0	0	-1	0	0	0	0	1	0	0
A0A494C193;Q08E93	0	0.59334	0	0	0	0	0	0	0	-1	0.40666
A0A494C1C4;P78552;P78552-2	-0.549106	0	0	0	0.549106	0	0	0	0	0	0
A0A494C1F2;P35658;P35658-2;P35658-3;P35658-4;P35658-5	0	0	0	0	0	0	0	0	0	0	0
A0A494C1J1;Q69YQ0;Q69YQ0-2	0	0	0.0657031	0	0	-0.271285	0	0	0	0	0.205582
A0A494C1J8	-0.49938	0	0.49938	0	0	0	0	0	0	0	0
A0A494C1L5;P50851-2	0	0	0	-0.0490924	0	0	0	0	0.0490924	0	0
A0A494C1M4;Q3SY69
A0A494C1N0;P26885	0	0	0	0	0	0	0	0	0	0	0
A0A494C1S7;Q9Y5Q9	0	0	0	0	0	0	0	0	0	0	0
A0A494C1T9;Q6ZRV2	0	0	0.556874	0	0	0	0	0	0	0	-0.556874
A0A494C1V1;Q6ZNJ1;Q6ZNJ1-2;Q6ZNJ1-3	0	0	0	-1	0	0	0	0	1	0	0
A0A499FI31;Q15020;Q15020-4	0	0	-0.106568	0	0	0	0	0	0.106568	0	0
A0A499FI48;P13667	0	-0.241349	0	0	0	0	0	0	0	0	0.241349
A0A499FIS5;A0A499FJN1;A0A499FJS1;Q9BUB5;Q9BUB5-2;Q9BUB5-3	0	0	0	-0.592801	0.630444	0	0	0.369556	-0.407199	0	0
A0A499FIX8;A0FGR8-2;H7BXI1	0	0	0	0	0	0	0	0	0	0	0
A0A499FIY8;C9JC07;C9JZL8;Q96S97	0	0	0	0	0	-0.369071	0	0	0	0	0.369071
A0A499FIZ0	0	0	0	0	0	0	0	0	0	0	0
A0A499FJI4;O75592;O75592-2
A0A499FJM4;P08684	0	0.326545	0	0	-0.326545	0	0	0	0	0	0
A0A539;A0A589	-0.352008	0	0	0	0	0	0	0	0.686792	-0.334784	0
A0A590PXD8;Q53SF7-3
A0A590UIU4;A0A590UJ09;A0A590UJ61;A0A590UJC8;A0A590UJF4;A0A590UJG1;A0A590UJH1;A0A590UJS0;A0A590UJT1;A0A590UK11;A0A590UK42;A0A590UK98;Q5VZ66
A0A590UJ36;A6NDB9
A0A590UJ43;P48729;P48729-3;U3KPX3	0	0	0	0	0	0	0	0	0	0	0
A0A590UJ46
A0A590UJ50;A0A590UJR3;Q13616	0	0	0	-0.555511	0	0	0	0	0.555511	0	0
A0A590UJ62;E7ETH1;Q14003	-0.510717	0	0	0	-0.489283	0	0	1	0	0	0
A0A590UJ68;A0A590UJR5;A0A590UJS9;A0A590UKA8;Q12959;Q12959-3;Q12959-5;Q12959-6;Q12959-7	0	0.376604	0	0	0	-0.255554	-0.089962	0	0	0	-0.0310873
A0A590UJ73;A0A590UJW4;E7EQB3;Q9BSV6	0	0	0	0	0	0	0	0	0	0	0
A0A590UJA9;C9JCW7;C9JE12;Q9BVT8	0	-0.247553	0	0	0	0	0	0	0	0	0.247553
A0A590UJB6
A0A590UJC7;A0A590UK51;O60733;O60733-2
A0A590UJF0;P63092-3	0	-0.0097222	0	0	0	0	0.426905	0	0	0	-0.417183
A0A590UJG2;Q9UPN3-2;Q9UPN3-3
A0A590UJK3;Q14BN4;Q14BN4-2;Q14BN4-3	0	0	0	0	0	0	0	0	0	0	0
A0A590UJK4;A0A590UJP7;A0A590UK01;A0A590UK80;Q13247;Q13247-3	0	0	0	0	0	0	0	0	0	0	0
A0A590UJL0;P08842	-1	0	0	1	0	0	0	0	0	0	0
A0A590UJN0;E7ETK1;E9PBA8;Q52LR7;Q9H2F5;Q9H2F5-2	0	0	0	0	0	0	0	0	0	0	0
A0A590UJS8;A0A5F9ZA98;B4DGL8;O75027;O75027-2	0	0	0	0	0	0	0	0	0	0	0
A0A590UJW0;A0A590UKC9;P20585	0	0	0	0	0	0	0	0	0	0	0
A0A590UJW8;Q96J02;Q96J02-2	0	0	0	0	0	0	0	0	0	0	0
A0A590UJY5	0.306191	0	0	-0.756538	0	0	0	0.450346	0	0	0
A0A590UK09;A0A590UK73;B1AKN5;B1AKN7;B1AKN8;Q12857;Q12857-2;Q12857-4	0	0	0	0	0	0	0	0	0	0	0
A0A590UK87	0	0	0	0	1	0	0	0	-1	0	0
A0A590UKC3;Q9UF12	0	0	0	0	0	0	0	0	0	0	0
A0A5E8;Q99501;Q99501-2;Q99501-3;Q99501-4	0	0	0.347898	0	0	0	-0.567711	0	0	0.219813	0
A0A5F9UK94;H0Y360;Q01433;Q01433-2	0	0	0	-0.00650262	0	0	0	0	0.00650262	0	0
A0A5F9UP49;Q9BRK5	0	0	0	0	-0.276183	0.276183	0	0	0	0	0
A0A5F9UY30;A0A5H1ZRP2;O43493;O43493-3;O43493-5;O43493-7	0	-0.528756	0	0	0.123539	0.405217	0	0	0	0	0
A0A5F9YFS9;C9JBL1;Q9Y6A9	0	-0.31111	0	0	0	0	0	0	0	0.31111	0
A0A5F9YLF9	-0.412272	0	0.412272	0	0	0	0	0	0	0	0
A0A5F9ZGN6	0	1	0	0	0	-1	0	0	0	0	0
A0A5F9ZGW5;C9J8U3;Q7Z2E3-13;Q7Z2E3-5;Q7Z2E3-7;Q7Z2E3-9	0	-1	1	0	0	0	0	0	0	0	0
A0A5F9ZGX0	0	0	0	0	1	-0.550162	0	0	0	0	-0.449838
A0A5F9ZGX3;A0A5F9ZGY3;A0A5F9ZGY4;A0A5F9ZGZ5;A0A5F9ZH19;A0A5F9ZH30;A0A5F9ZHD2;A0A5F9ZHE4;A0A5F9ZHN5;A0A5F9ZHR8;A0A5F9ZHS1;A0A5F9ZI30;A0A5F9ZI40;A0A5F9ZI65;D6RHE1;I6L894;Q01484	0	0	-1	0	0	0	0.388217	0	0	0.611783	0
A0A5F9ZGY7	0	0	0	0	0	0	0	0	0	0	0
A0A5F9ZH20;A0A5F9ZH60;A0A5F9ZH84;Q5TF39
A0A5F9ZH43;A0A5F9ZHW6;A4UGR9-4;A4UGR9-5;A4UGR9-6;A4UGR9-7	0	0	0.673055	0	0	-0.371259	0	0	0	-0.268088	-0.0337085
A0A5F9ZH85	0	0	0.515283	0	0.0750202	0	0	0	0	-0.590303	0
A0A5F9ZH93;A0A5F9ZHX9;Q9UHN1	0	0	0	0	0	0	0	0	0	0	0
A0A5F9ZHE0;C9JQD1;P35557	0	0	0	0	0	0	0	0	0	0	0
A0A5F9ZHH6;P19793;P19793-2	0	0	0	0	0	0	0	0	0	0	0
A0A5F9ZHJ0	0	0	0	0	0	0	0	0	0	0	0
A0A5F9ZHM4;P07195	0	0	0	0	0	0	0	0	0	0	0
A0A5F9ZHN2;E7EWD6;Q76L83;Q76L83-2	0	0	0	0	0	0	0	0	0	0	0
A0A5F9ZHN7;Q9NTJ5	0	0	0	0	0	0	0	0	0	0	0
A0A5F9ZHN9;P51648;P51648-2	0	0	0	0	0	0	0	0	0	0	0
A0A5F9ZHP1;Q8N9N2-2
A0A5F9ZHQ6;A0A6I8PIF8;A0A6I8PIP2;A0A6I8PU78;O75071;S4R3Q1	-1	0	0	0	0	0	0	0	1	0	0
A0A5F9ZHX8;A0A5F9ZHZ5;F5GYY5;F5H324;P51690	0	0	0	0	0	0	0	0	0	0	0
A0A5F9ZI21;Q92974;Q92974-2;Q92974-3;V9GYF0;V9GYM8	0	0	0	0	0	0.42714	0	0	0	0	-0.42714
A0A5F9ZI33	0	-0.0928244	0	0	0.227161	0	0	0	0	0	-0.134337
A0A5F9ZI76;Q32ZL2;Q32ZL2-2	0	0	1	0	0	-0.451344	0	0	0	-0.548656	0
A0A5H1ZRP4;Q8WX92;Q8WX92-2	0	0	0	0	0	0	0	0	0	0	0
A0A5H1ZRR2;G9CGD6;G9CGD6-2;G9CGD6-3;Q6P9H4
A0A5H1ZRS1
A0A5K1VW60;Q99766	0	0	0	0	0	0	0	0	0	0	0
A0A5K1VW66;P35240;P35240-2;P35240-3;P35240-4;P35240-5;P35240-6;P35240-8	-0.426068	0.558628	0	0	0	0	0	0	0	0	-0.13256
A0A5K1VW70;P98198;P98198-3	0	0	-1	0	0	0	0	0	0.645036	0	0.354964
A0A5K1VW95;P40925;P40925-3	0	0	0	0	0	0	0	0	0	0	0
A0A669KA36;A0A669KB88;B7ZLR4;E7ET55;F5H748;P35670;P35670-2;P35670-4	0	-0.606078	0	0	0.301572	0.304506	0	0	0	0	0
A0A669KAV7;A0A669KBH9;M0QXA7;O95785-3	0	0	0	0	0	0	0	0	0	0	0
A0A669KAW1;G3XAD2;Q9BYC5;Q9BYC5-2;Q9BYC5-3	0	0	0	0	0	0	0	0	0	0	0
A0A669KAX3;O76024	0.256203	-0.256203	0	0	0	0	0	0	0	0	0
A0A669KAX4;K4DI93;Q13620;Q13620-1;Q13620-3	0	0	0	-0.614219	0	0	0	0	0.614219	0	0
A0A669KAX9;Q5T653	0	0	0	0	0	0	0	0	0	0	0
A0A669KAY5;A0A669KB27;A0A669KBH7;C9JTE9;Q9UHQ4;Q9UHQ4-2
A0A669KB10;A0A669KBG8;Q92538;Q92538-2;Q92538-3	0	0	0	0	0.0339244	0	0	-0.0339244	0	0	0
A0A669KB12;Q09472	0	0	0	0	0	0	0	0	0	0	0
A0A669KB29;K7EQ21;K7EQZ1;Q9P0U4;Q9P0U4-2
A0A669KB41;A0A669KBH5;D6RA31;E7EPV7;P37840;P37840-2;Q16143	0	0	0	-1	0	0	0	0	0	1	0
A0A669KB53;A0A669KB56;A0A669KB68;A0A669KBA4;A0A669KBI6;J3KPM9;P42224;P42224-2	0	0	0	-0.301037	0	0	0	0	0.301037	0	0
A0A669KB69;Q6Q788	0	0	0	0	-0.51946	0.51946	0	0	0	0	0
A0A669KB71;O94842;O94842-2;O94842-3	0	0	1	0	0	0	0	-1	0	0	0
A0A669KB81	0.405119	0	0	0	-0.405119	0	0	0	0	0	0
A0A669KBE6;A0A669KBF5;Q9NV96;Q9NV96-2;Q9NV96-3	0	-0.0304464	0	0	0	0.411512	0	0	0	0	-0.381065
A0A669KBF4;O00327;O00327-1;O00327-6;O00327-7;O00327-8;O00327-9	0	0	0	0	0	0	0	0	0	0	0
A0A669KBG1	-0.61487	0	0	0	0.61487	0	0	0	0	0	0
A0A669KBH1	0	0	0	0	-0.435305	0	0	-0.267901	0	0.306347	0.396859
A0A669KBH4;Q14999;Q14999-2	0	0	-0.238473	0	0	0	0	0.258615	-0.0201421	0	0
A0A669KBJ1;Q9P202;Q9P202-3;Q9P202-4	0.379575	0	0	0	-1	0	0	0	0	0	0.620425
A0A669KBJ4;E7ERL6;Q6P0Q8;Q6P0Q8-2	-1	0	0	0	0	1	0	0	0	0	0
A0A669KBJ7;Q9H2P0	0	0	0	0	0	0	0	0	0	0	0
A0A669KBL1;Q93009;Q93009-3	0	0	-0.33723	0	0	0	0	0	0.33723	0	0
A0A6E1WB48;Q14541;Q14541-2	0	0	0	0	-0.597981	0	1	0	0	-0.402019	0
A0A6I8PIT3;A0A6I8PIV1;Q9P2J5	0	0	0	0	0	0	0	0.215738	-0.215738	0	0
A0A6I8PR89	0	0	0	0	0.060605	0	0.357816	-0.418421	0	0	0
A0A6I8PRM6;B1ALU3;O95490-2;O95490-5	0	0.518537	0	0	0	-0.467258	0	0	0	0	-0.0512784
A0A6I8PS32;Q99615	0	0	0	0	0	0	0	0	0	0	0
A0A6I8PTZ8;Q9UL18	0	-0.386489	0	0	0	0	0.386489	0	0	0	0
A0A6I8PU65;Q9NUD9	-0.225965	0.511559	0	0	-0.774035	0	0	0	0	0	0.488441
A0A6Q8JGF9;I3L1H5;I3L3X9;Q9BZG8;Q9BZG8-2;Q9BZG8-3	0	0	0	0	0	0	0	0	0	0	0
A0A6Q8KRG2;Q08379	0	0	0	0	0.0549616	0	0	-0.0549616	0	0	0
A0A6Q8PEX6;A0A6Q8PFB7;A0A6Q8PG86;A0A6Q8PHF4;O95163	0	0	0	0	0	0	0	0	0	0	0
A0A6Q8PEY3;A0A6Q8PGV6;I3L3G9;I3L522;Q9NXR1;Q9NXR1-1
A0A6Q8PEZ4;A0A6Q8PFG4;A0A6Q8PGL3;A0A6Q8PGS2;A0A6Q8PGU0;A0A6Q8PH79;B4DIH2;Q8TB36;Q8TB36-2	0	0	-0.416809	0	0	0	0.270885	0	0	0.145924	0
A0A6Q8PEZ7;A0A6Q8PG30;A0A6Q8PHQ1;Q96S66	0	-0.25695	0	0	0	0	0	0	0	0	0.25695
A0A6Q8PF03	0	0	0	-1	0	0	0	0	1	0	0
A0A6Q8PF05;B4DHE8;J3KTC1;Q96DH6;Q96DH6-2
A0A6Q8PF14	0	0	0	0	0	0	0	0	0	0	0
A0A6Q8PF33;A0A6Q8PGE8;A0A6Q8PGN5;H3BPK7;P49588	0	0	0	0	0	0	0	0	0	0	0
A0A6Q8PF40;A0A6Q8PFC4;A0A6Q8PFY7;A0A6Q8PG00;A0A6Q8PG04;A0A6Q8PGS4;A0A6Q8PH27;A0A6Q8PH89;Q92734;Q92734-2;Q92734-3;Q92734-4	0	0	0	0	0	0	0	0	0	0	0
A0A6Q8PF44;A0A6Q8PH71;A0A6Q8PHA2;A0A6Q8PHG2;Q27J81;Q27J81-2
A0A6Q8PF62;A0A6Q8PF70;A0A6Q8PF86;A0A6Q8PFJ3;A0A6Q8PG59;A0A6Q8PGB4;A0A6Q8PGP4;A0A6Q8PGY4;A0A6Q8PGY7;A0A6Q8PHA1;A0A6Q8PHC7;A0A6Q8PHH5;A0A6Q8PHK3;A0A6Q8PHP5;Q92562	0	0	0	0	-0.453853	0	0	-0.161062	0.614915	0	0
A0A6Q8PF94;O15344	0	0	0	0	0	0	0	0	0	0	0
A0A6Q8PFA4;A0A6Q8PFD4;A0A6Q8PFI6;A0A6Q8PFL5;A0A6Q8PFT9;A0A6Q8PFW1;A0A6Q8PG02;A0A6Q8PG22;A0A6Q8PGB2;A0A6Q8PGF7;A0A6Q8PGH6;A0A6Q8PGT8;A0A6Q8PGW1;A0A6Q8PGY0;A0A6Q8PH15;A0A6Q8PH70;A0A6Q8PH85;Q6UWE0;Q6UWE0-2	0	0	0	0	0	0	0	0	0	0	0
A0A6Q8PFA6;A0A6Q8PG37;A0A6Q8PGH7;A0A6Q8PH57;O00139;O00139-1;O00139-2;O00139-4;O00139-5	0	0	0	0	0	0	0	0	0	0	0
A0A6Q8PFE6;Q9UKA9;Q9UKA9-2;Q9UKA9-3;Q9UKA9-4	0	0	0	0	0	0	0	0	0	0	0
A0A6Q8PFG0;A0A6Q8PGT4;A0A6Q8PH04;A0A6Q8PHN3;A0A6Q8PHP9;Q9P212;Q9P212-2	0.548828	0	0	0	-0.548828	0	0	0	0	0	0
A0A6Q8PFI8;P11166	0	0	0	0	0.351466	0.346205	0	-0.697671	0	0	0
A0A6Q8PFJ0;P02545	0	0	0	0	0	0	0	0	0	0	0
A0A6Q8PFJ4;A0A6Q8PGV8;O95140	0	0	0	0	0	0	0.328865	0	0	-0.328865	0
A0A6Q8PFK4;P50747	0	0	0	0	0	0	0	0	0	0	0
A0A6Q8PFM5;O95831;O95831-3	0	0	0	0	0	0	0	0	0	0	0
A0A6Q8PFU3;P43034	0	0	0	0.0346036	0	0	0	0	-0.0346036	0	0
A0A6Q8PG52;A0A6Q8PH84;P51149	-0.601356	0	0	0	0	0.601356	0	0	0	0	0
A0A6Q8PG54;G3XAG5;P51793;P51793-2	0	0	0	0	-0.402764	0	0	0.402764	0	0	0
A0A6Q8PG85;Q9HD42	0	0	0	0	0	0	0	0	0	0	0
A0A6Q8PGA8;A0A6Q8PGI6;A0A6Q8PGZ8;A0A6Q8PHH9;P41250	0	0	0	-0.308052	0	0	0	0	0.308052	0	0
A0A6Q8PGB0;P24928	0	0	0	0	0	0	0	0	0	0	0
A0A6Q8PGM6;Q9UJY1
A0A6Q8PGS5;A0A6Q8PHS7;C9JEX3;Q13614;Q13614-2
A0A6Q8PGU6;Q8NB90
A0A6Q8PH13;A0A6Q8PH87;Q86WG5;Q86WG5-3	0	0	0.533628	0	0	0	0	0	0	0	-0.533628
A0A6Q8PHA5;E7ETE2;P12081;P12081-4	0	0	0	0.314092	0	0	0	0	-0.314092	0	0
A0A6Q8PHC6;P50440	0	0	0	0	0	0	0	0	0	0	0
A0A6Q8PHH2;O95251;O95251-2;O95251-4	0	0	0.353595	0	-0.353595	0	0	0	0	0	0
A0A6Q8PHK0;Q14669-2	0	0	0	0	0	0	0	0	0	0	0
A0A6Q8PHM5	0	0	0.447023	0	0	0	0	0	0	-0.447023	0
A0A6Q8PHP0;P49902;P49902-2	0	0	0	-1	0	0	0	0	1	0	0
A0AV96-2	0	0	0	0	0	0	0	0	0	0	0
A0AVL1;F8WC54;Q13443;Q13443-2	1	0	0	0	0	0	0	0	0	-1	0
A0AVT1	0	0	0	0	0	0	0	0	0	0	0
A0MZ66	0	0	0	0	0	0	0	0	0	0	0
A0PJW6	0	0	0.203013	0	0	0	0	0	0	-0.203013	0
A0PJX8	0	0.0845147	0	0	-0.49281	0.408295	0	0	0	0	0
A0PJZ3;C9JND4	0.357265	0	0	0	-0.303079	-0.394797	0	0	0	0	0.340611
A0RZB6	-1	0	0	0.606104	0	0	0	0	0.393896	0	0
A1A4S6;H0Y8W5	0.212116	0	0.0240597	0	0	-0.261357	0	0	0	0	0.0251807
A1A519;A1A519-2;A1A519-3;D6RIE9
A1A5C7;A1A5C7-2;A1A5C7-3;C9J4Z0	-0.223603	0	-0.29924	0	0	-0.232922	0	0	0	0	0.755765
A1IGU5
A1KZ92;A1KZ92-2;A1KZ92-3;H0YAV0;K4DIA6	0	0	-0.110253	0	0.407504	0	0	0	0	-0.297251	0
A1L0T0	-0.24278	0.24278	0	0	0	0	0	0	0	0	0
A1L188
A1L390;A1L390-3
A1X283	0.332774	0	0	-0.332774	0	0	0	0	0	0	0
A2A274;Q99798	0	0	0	0	0	0	0	0	0	0	0
A2A2L4;Q5JX74;Q9NUS5
A2A2N0;O60676	0.293096	0	0	0	0	0	0	0	0	-0.293096	0
A2A2Q9;Q9Y312	0	0	0	-0.324802	0	0	0	0	0.324802	0	0
A2A2V1;P04156	-0.420508	0	0	0	-0.309897	0.219768	0	0	0	0	0.510638
A2A2V2;P42696;P42696-2;Q5TCT4	0	0	0	0	0	0	0	0	0	0	0
A2A369;Q8NF50;Q8NF50-2;Q8NF50-3;Q8NF50-4	0	-0.355686	0	0	0	0	0	0	0	0	0.355686
A2A3G7	0	0	0	0	0	0	0	0	0	0	0
A2AJT9;A2AJT9-2;A2AJT9-3;F2Z385;H7BXX2	0	0	-0.462998	0	0.462998	0	0	0	0	0	0
A2IDC6;Q13084	0	0	0	0	0	0	0	0	0	0	0
A2RRP1	-0.242187	-0.192487	0	0	0	0.434674	0	0	0	0	0
A2RTX5;B7ZLP8	0	0	0	0	0	0	0	-0.0253727	0.0253727	0	0
A2RU37	0	0	0	0	0.259169	0	0	-0.259169	0	0	0
A2RU49	0	0	0	0	0	0	0	0	0	0	0
A2RUC4	0	0	0	-0.486202	0	0	0	0	0.486202	0	0
A2RUS2;A2RUS2-2;A2RUS2-4;E5RHH2;E5RI43;E5RIR7;E5RJ42;E9PF32;H0YAY3	0	0	0	0	0	0	0	0	0	0	0
A2VDF0	0	0	0	0	0	0	0	0	0	0	0
A2VDJ0;A2VDJ0-3;A2VDJ0-5	-0.207891	0	1	-0.792109	0	0	0	0	0	0	0
A3KFL2;Q13868;Q13868-2;Q13868-3	0	0	0	0	0	0	0	0	0	0	0
A3KMH1;A3KMH1-3	0	0	0	0	0	0	0	0	0	0	0
A3KN83;A3KN83-2;A3KN83-3
A4D1E9	0	0	0	0	0	0	0	0	0	0	0
A4D1P6	0	0	0	0	0	0	0	-0.384989	0.384989	0	0
A4D1U4;C9J7X6
A4D2B0	0	0	0	0	0	0	0	0	0	0	0
A5D8V6;F5H4Q5
A5D8V7;A5D8V7-2;K7EN59;K7EPK8	0	0	0	0	0	0	0	0	0	0	0
A5PLN9;A5PLN9-2;A5PLN9-4;A5PLN9-5	0	0	0	0	0	0	0	-0.628334	0.628334	0	0
A5YKK6;A5YKK6-2
A6H8Y7;Q6ZRK6;Q6ZRK6-2	0	0	0	0	-0.365469	0	0	0	0	0	0.365469
A6NC78	0	0	0	0	0	0	0	0	0	0	0
A6NCC9;C9JHT9;C9JJV1;E9PME3;Q9Y5U2;Q9Y5U2-2	-0.179916	0	0	0.179916	0	0	0	0	0	0	0
A6NCE7;H3BTL1;Q9GZQ8	0.371719	0	0	0	-0.489504	0.628281	0	-0.510496	0	0	0
A6NCS6	0	0.374844	0	0	0	-0.451113	0.237696	0	0	0	-0.161428
A6ND36
A6ND91	0	0	0	0	0	0	0	0	0	0	0
A6NDG6	0	0	0	0	0	0	0	0	0	0	0
A6NDL8	0	0	0	0	0	0	0	0	-1	1	0
A6NDR6	0	0	0.279082	0	-1	0	0.271396	0	0.449522	0	0
A6NDU8	0	0	0	-1	0	0	0	1	0	0	0
A6NE01;F5GYN0;F5H8C1	0	0	0	0	-0.320939	0	0	-0.165279	0.486218	0	0
A6NED2;G3V2I3	0	0	0	-0.342598	0	0	0	0	0.342598	0	0
A6NEE1	0	0	0	0	0	0	0	0.349999	-0.349999	0	0
A6NEL0;A6NL93;P05114	0	0	0	0	0	0	0	0	0	0	0
A6NEL2	0	0	-0.0739918	0	0	0	0	0	0	0	0.0739918
A6NEM2;P51610;P51610-2;P51610-4	0	0	0	0	0	0	0	0	0	0	0
A6NEY8	0	0	0	0	0	0	0	0	0	0	0
A6NF36	0	0	0	0	0	0	0	0	0	0	0
A6NFQ9;F8W8I8
A6NFS0;Q9NSD4;Q9NSD4-2	-0.525103	0	-0.474897	0	0.47125	0	0	0	0	0	0.52875
A6NFV8;D6RCT8	0	0	1	0	-1	0	0	0	0	0	0
A6NFX8;Q9UKK9	0	0	0	0	0	0	0	0	0	0	0
A6NFY7	0	0	0	0	0	0	0	0	0	0	0
A6NG10;K7EIJ0;K7EMC9;K7ENL2;Q969T9	0	0	0	0	0	0	0	0	0	0	0
A6NGA6;Q5H9D4;Q9Y5S8;Q9Y5S8-2;Q9Y5S8-3	1	0	0	0	-1	0	0	0	0	0	0
A6NGJ0;P51808
A6NGL4;P0CW00	-0.253011	0	0.270474	0	0	-0.513441	0	0	0.495977	0	0
A6NGQ3;Q5VST9;Q5VST9-2;Q5VST9-6	0	0.545404	0	0	0	0	-0.545404	0	0	0	0
A6NGU5;B5MCK8;P19440	0	0.54805	0	0	0	-0.438181	0	0	0	0	-0.109869
A6NGW1;O95070	0	-0.398625	0	0	0.398625	0	0	0	0	0	0
A6NGY7;Q9H694-2	0	0.631126	-0.513543	0	0	-0.226342	0	0	0	0	0.108759
A6NH11	0	0	0	0	0.0972136	0	0	-0.0972136	0	0	0
A6NHG8;Q13114	0	-0.355763	0	0	0	0	0	0	0	0	0.355763
A6NHJ8;A6NND8;C9JAL0;C9K0F7;H7C3I5;O95825;O95825-2	0	0	0	0	0.504379	0	-1	0.495621	0	0	0
A6NHR9;A6NHR9-2	-0.0673467	0	0.0673467	0	0	0	0	0	0	0	0
A6NI28;E9PJK4	0	0.575821	-0.649777	0	0	0	0	0	0	0	0.0739555
A6NI72;A8MVU1;C9J155;P14598;P14598-2	0	0	0	0	1	0	0	-1	0	0	0
A6NIH7	0	0	0	-0.356275	0	0	0	0	0.356275	0	0
A6NIT2;A6NMN0;P46020;P46020-2;P46020-3	0	0	0	-0.458912	0	0	0	0.234692	0.22422	0	0
A6NIV6	-1	0	0	0	1	0	0	0	0	0	0
A6NIZ0;Q9GZM8;Q9GZM8-2;Q9GZM8-3
A6NJA2;P54578;P54578-2;P54578-3	0	0	0	0	0	0	0	0	0	0	0
A6NK44;H7C348	0	0	0	0	0.347124	0	0	0.298574	0	0.354302	-1
A6NKB5-2	0.550244	0	0.449756	0	-0.645926	-0.354074	0	0	0	0	0
A6NKD9	0	0	-0.278377	0	0	-0.344278	0	0	0	0	0.622654
A6NKN8	0	0	0	0	0	0	0	0	0	0	0
A6NKZ2;P51606	0	0	0	-1	0	0	0	0	1	0	0
A6NLH6;Q9P003	0	-0.517325	0	0	0.254479	0.262846	0	0	0	0	0
A6NLN1;P26599;P26599-2;P26599-3	0	0	0	0	0	0	0	0	0	0	0
A6NLP5	0	0	0	0	0	0	0	0	0	0	0
A6NMH6;Q92599;Q92599-2;Q92599-4	0	0	-1	0	0	0	1	0	0	0	0
A6NML8;C9J6U3;O60879-2	0	0	0	-0.0363218	0	0	0	0	0.0363218	0	0
A6NMQ3;O43768;O43768-2;O43768-3;O43768-4;O43768-9;Q5T5H1	0	0	0	0	0	0	0	0	0	0	0
A6NMV7	0	0	0	0	0	0	0	0	0	0	0
A6NMZ5	-0.364813	0	0	0	0.420272	0	0	0	0	0	-0.0554592
A6NMZ7;A6NMZ7-2	0	0	-0.391214	0	0	0	0	0	0	0.391214	0
A6NN50;O75147;O75147-1;O75147-2;O75147-4	0	0	0	0	-0.376974	0	0	-0.227611	0.604585	0	0
A6NNK5;Q12888;Q12888-2;Q12888-3	-0.304685	0	0.304685	0	0	0	0	0	0	0	0
A6NP16;E7ERM3;Q4VCS5;Q4VCS5-2	0	0	-0.53845	0	0	0	0	0	0	0	0.53845
A6NP52;O60831	0	0	0	0	0	0	0	0	0	0	0
A6PVD3;P48436;P56693;P56693-2;P57073	0.138714	0	0	0	-0.138714	0	0	0	0	0	0
A6PVK5
A6PVU8;Q6UWW7;Q9NNX1;Q9NNX1-2;Q9NNX1-3
A6PVY1;A6PVY2;A6PVY3;A6PVY3-2
A6PW57;Q99755;Q99755-3;Q99755-4	-0.238671	0	0.542837	0	0	-0.415941	0	0	0	0	0.111775
A6PWM2;Q6UXH1;Q6UXH1-2;Q6UXH1-3;Q6UXH1-4;Q6UXH1-5;Q6UXH1-6	0	-0.271391	0	0	0	0	0	0	0	0	0.271391
A6XND0;A6XND1;B3KWK7;C9JMX4;H0Y5K2;P17936;P17936-2	0	-0.596324	0	0	0	0.437409	0	0	0	0	0.158915
A7E2V4;A7E2V4-3;A7E2V4-4;A7E2V4-5;S4R393;S4R410	0	0	0	0	-0.410461	0	0	0.094321	0.31614	0	0
A7KAX9;A7KAX9-2	0.354194	0	0	0.645806	0	0	0	0	-1	0	0
A7MCY6
A7XZE4;Q3SX28	0	0	-0.587283	0	0	-0.412717	1	0	0	0	0
A8CG34;A8CG34-2	0	0	0	0	0	0	0	0	0	0	0
A8DPD7;Q9C0D3	0	0	0	0	0	0	0	0.23939	0.76061	0	-1
A8MPP7;A8MPY5;E7ETV6;Q9UPE1;Q9UPE1-2;Q9UPE1-3;Q9UPE1-4	-0.357259	0	0.470826	0	-0.642741	0	0.529174	0	0	0	0
A8MQ02	0	0	-0.552842	0	0	0	0	0	0	0	0.552842
A8MQB8;G3V0J0;Q06787-2	-0.362264	0.366383	0	0	0	-0.414234	0	0	0	0	0.410116
A8MSI8;D6RAR2;D6RFL2;J3KTA2	0.505816	0	0	0	0	0	0	0	0	-0.214733	-0.291084
A8MSY1;C9JYJ2;Q8IVN3	-0.220945	0	0	0.220945	0	0	0	0	0	0	0
A8MTT3	0	0	0	0	0	0	0	0	0	0	0
A8MUM1;Q53HC9	0	0	1	0	0	0	-1	0	0	0	0
A8MVV6;E9PN41;E9PPX8;E9PSH3;J3KQ42;O14817	0	0	0	0	0	0	0	0	0	0	0
A8MVZ6;Q96G01;Q96G01-3;Q96G01-4	0	0	0.737176	0	-0.737176	0	0	0	0	0	0
A8MWD9;F5H013;P62308;Q49AN9	0	0	0	0	0	0	0	0	0	0	0
A8MXB7	0	0	0	0.00283741	0	0	0	0	-0.00283741	0	0
A8MXV4	0	0	0	0	0	0	-0.429218	0	0	0.429218	0
A8MYA3;J3KQ25;Q8N6M9
A8MYZ0	-0.360075	0	0.408061	0	0	0	0	0	0	-0.639925	0.591939
A8TX70;A8TX70-2;E9PAL5	0.210084	0	-0.5659	0	0	0	0	0	0	0.355816	0
A9J4F5;O00488	0.369483	0	0	0	0	0	0.630517	0	0	-0.45769	-0.54231
A9X3U0;Q96GF1
A9Z1X7;E9PCT1;Q8IYB3;Q8IYB3-2	0	0	0	0	0	0	0	0	0	0	0
B0QY89;Q9Y262	0	0	0	0	0	0	0	-0.0116225	0.0116225	0	0
B0QY95;Q9NQG6	-0.479439	0	0	0	1	0	-0.520561	0	0	0	0
B0QYF8;P02144	-0.818498	0	0	0.818498	0	0	0	0	0	0	0
B0QYK0;Q01844;Q01844-3;Q01844-5;Q01844-6
B0QYN7;H3BQQ9;P63279	0	0	0	0	0	0	0	0	0	0	0
B0QYP2;O95931	0	0	0.517451	0	0	-0.262742	0	0	0	0	-0.254709
B0QYW5;F6RTR7;O43808	0	0	0	0	0	0	-0.0890694	0	0	0.0890694	0
B0QZ18;F2Z2V0;Q99829	0	0	0	0	0	0	0	0	0	0	0
B0YIW2;P02656	0	0.631224	-0.526309	0	0	0.368776	0	0	0	0	-0.473691
B1AH87;P30536	0	0	0.231901	0	0	0	-0.377415	0	0	0.145514	0
B1AHA8;P09601	0	-0.415267	0	0	0	0.415267	0	0	0	0	0
B1AHB1	0.428845	0	0	0	0	0	0	0.571155	-1	0	0
B1AHL2;P23142;P23142-2;P23142-3;P23142-4	0	0	0	0	0	0	0	0	0	0	0
B1AHR2	-0.0378472	0	0	0.0378472	0	0	0	0	0	0	0
B1AJQ6;Q86Y82	0	0	0	0	-0.49965	0.49965	0	0	0	0	0
B1AJS1;O14525;O14525-2;O14525-3	0	0	0.551711	0	0	0	0	0	0.448289	-0.528	-0.472
B1AK53	0	0	0	0	0	-0.0601561	0	0	0	0	0.0601561
B1AK61;Q5VTY9;Q5VTY9-2;Q5VTY9-3;Q5VTY9-5;Q5VTY9-6;Q5VTY9-7	0	0	0	0	0.439339	0	0	-0.439339	0	0	0
B1AK88;P47756-2
B1AKC9;P29323;P29323-2;P29323-3	0.225196	0	0	0	-0.378977	0	0	0.0734823	0.0802991	0	0
B1AKG0;Q03591	-0.185809	0.455227	0	0	-0.178362	-0.371859	0	0	0	0	0.280803
B1AKI6;Q9NUK0;Q9NUK0-2
B1AKL4;Q9NRA8;Q9NRA8-2;Q9NRA8-3	0	0	0	0	0.103439	-0.278733	0	0.175294	0	0	0
B1AKR6;Q9NP97	0	0	0	0	0	0	0	-0.325152	0.325152	0	0
B1AL05;H0Y6Y8;Q8N983;Q8N983-2;Q8N983-3;Q8N983-4;Q8N983-6;Q8N983-7	0	0	0	0	0	0	0	0	0	0	0
B1AL69;Q7L3B6	0	0	0	0	0	0	0	0	0	0	0
B1ALA9;P60891	0	0	0	0	0	0	0	0	0	0	0
B1ALD1;Q9Y6B7	0	0	0	0	0.54787	-0.431214	0	-0.116656	0	0	0
B1ALM5;Q9P0T7	0	-0.523908	0	0	0.0874067	0.436501	0	0	0	0	0
B1ALY0;Q8IXS6-2	0	0	0	0	0	0	0	0	0	0	0
B1AM21	0	0	-0.323517	0	0	0	0.398447	0	0	0.276824	-0.351754
B1AM27;O14795;O14795-2	0	0	-1	0	0	0	0	0.341297	0.658703	0	0
B1AMI2	0.254091	0	-0.458411	0	0	0	0.39265	0	0	-0.541589	0.353259
B1AMN7;Q9P2B4
B1AMS2;Q14141;Q14141-2;Q14141-4	0	0	-1	0	0	0	1	0	0	0	0
B1AMW1;H0YDI1;P19256;P19256-2;P19256-3	0	0.411096	0	0	0	-0.403217	0	0	0	0	-0.00787948
B1ANE6	0.611626	0	0	0	0	0.388374	0	0	-1	0	0
B1ANH0;B1ANH2;Q16774;Q16774-2
B1APN9;O75335	1	0	-0.357553	0	0	0	0	0	-0.642447	0	0
B1APR7;Q99504;Q99504-2;Q99504-3;Q99504-4;Q99504-5	0	0	0	0	0	0	0	0.302809	-0.302809	0	0
B1AQK6;B1AQK7;E9PDR3;F6RH32;Q00975;Q00975-2	0	0	0.597124	0	-1	0	0	0	0	0.402876	0
B1AVT0;P49760;P49760-3	0	0	0.372757	0	0	-0.372757	0	0	0	0	0
B1AXG1;B4DG22;B7ZB17;P51812	0	0	0	0	0	0	0	0	0	0	0
B2RC85;B2RC85-2;H0YFY2;P0C881	0.295545	0	0	0	0.110139	0	0	-0.405685	0	0	0
B2WTI3;B2WTI4;K7EJU9;Q6NYC1;Q6NYC1-2;Q6NYC1-3	0	0	0	-1	1	0	0	0	0	0	0
B3EWG3;B3EWG5;B3EWG6	-0.230937	0	0	0.230937	0	0	0	0	0	0	0
B3KP42	0	0	0.295067	0	0	0	0	0	0	-0.295067	0
B3KP96;H0Y626;J3QKY5;K7EL43;K7ENN8;O95361;O95361-2	0	0	0	0	1	0	0	-0.538534	0	0	-0.461466
B3KS81	0	0	0	0	-0.150576	0	0	0.150576	0	0	0
B3KT41;Q496J9	0	0	0	0	0	0	0	0	0	0	0
B3KTM8;H0YLJ3;Q9UBU8-2	0	0	0	0	0	0	0	0	0	0	0
B3KUS5;Q70CQ3	0	0	0.429645	0	0	0	-0.287524	0	0	0.202327	-0.344448
B3KVY5;F5GWA4;F5GWK6;F5H268;Q9H3F6;Q9H3F6-2;Q9H3F6-3	0	0	-0.303136	0	0	-0.341599	0	0	0	1	-0.355265
B3KY94;O14735;O14735-3	0	0	0	0	0	0	0	0	0	0	0
B4DDD6	0	0	0	0	0	0	0	0	0	0	0
B4DDF4;B4DUT8;Q99439	0	0	0	0	0	0	0	0	0	0	0
B4DDX3;H7C1L4;Q8TCB7	0.253495	0	0	0	0	0	0	0	-0.253495	0	0
B4DEE8;P16455
B4DEN4;B8ZZ56;E7EV05;E9PFU9;Q8WV99;Q8WV99-2
B4DFC0;E9PMV6;E9PR50;G3V1B4;H0YD20;H0YE53;H0YEL8;Q9UGK8;Q9UGK8-2	0.106953	0	0	-0.701953	0	0	0	0	0.595	0	0
B4DI03;K7EJQ7;Q9BY50	0	0	0	0	0	0	0	0	0	0	0
B4DJ07	0.179174	0	0	0	0.116273	0	0	-0.295447	0	0	0
B4DJ62;C9JM82;E7EPG2;E7EQM7;E7EX32;F8W9E5;G3XAH0;Q99719;Q99719-2	0	0	-0.445634	0	0	0	0	0	0	0.445634	0
B4DJV2;O75390	0	0	0	0	0	0	0	0	0	0	0
B4DJV5;Q13610	0	0	0	0.00185304	0	0	0	0	-0.00185304	0	0
B4DK77;Q9H6K4	0	0	0	0	0	0	0	0	0	0	0
B4DL54	0	0	0	0	0	0	0	0	0	0	0
B4DLJ1	0	0	0	0	0	0	0	0	0	0	0
B4DLN1	0.21929	0	0	0	0	0	0	0	0	-0.269987	0.0506977
B4DLP0;B8ZZF7;O00338;O00338-2
B4DR61;P61619	0	0	0	0	0	0	0	0	0	0	0
B4DR80;Q9Y6E0;Q9Y6E0-2
B4DUC8;Q13126	0	0	0	0	0	0	0	0	0	0	0
B4DUJ5;Q8IWP9	0	0	0	0	-1	0	0	0	0	0	1
B4DVN3;E7ESC7;Q7L5Y9;Q7L5Y9-3	0	0	0	0	0	0	0	0	0	0	0
B4DVT3;Q96SY0	0	0	-0.694783	0	0	0.347833	0	0.346949	0	0	0
B4DXZ6;P51114	0	-0.29571	0	0	0	0	0	0	0	0	0.29571
B4DYU2;H3BQV3;Q96MW5	0	0	0	-0.60368	0	0	0	0.321839	0.281841	0	0
B4DYY6;Q75T13;Q75T13-2;Q75T13-3	0	0.188854	0	0	0	-0.273913	0	0	0	-0.284678	0.369737
B4DZK5;Q9HAQ2;Q9HAQ2-2	0	0	0	0	-0.482256	0	0	0	0	0	0.482256
B4E0E3;G3V1M5;Q9H6X4;Q9H6X4-2;Q9H6X4-3	0	0	1	0	0	0	0	-1	0	0	0
B4E0T2;P50542;P50542-4	0	0	0	0	0	0	0	0	0	0	0
B4E107;F5GXE4;O95260-2	0	0	0	0	0	0	0	0	0	0	0
B4E1G1;Q9BUN8;Q9BUN8-2	0	0.0860587	0	0	-0.0860587	0	0	0	0	0	0
B4E1Q4;O14730	0	0	0	0	0	0	0	0	0	0	0
B4E1Z4
B4E2Q0;P98194;P98194-4	0	0	0	0	-0.346847	0	0	0.346847	0	0	0
B4E3T4;Q93062;Q93062-2;Q93062-3;Q93062-4;Q93062-5
B5MC20;P0C870	0.206347	0	0	-0.206347	0	0	0	0	0	0	0
B5MC22;Q9UDX5	0	0	0	0	0	0	0	0	0	0	0
B5MC35;B5MCA1;B5MD16;Q96G28;Q96G28-2	0	0	0	0	0	0	0	0	0	0	0
B5MC51;P53671-3	0	0	-0.542571	0	0.3403	0	0	0	0	0	0.202272
B5MC53;B5MCF8;E7EX18;G5E9F5;P39210	0	0	0.568124	0	0	0	0	0	0	-0.568124	0
B5MCF4;C9JDC5;P05230;P05230-2	0	0	0	0	0	0	0	0	0	0	0
B5MCF9;O00541;O00541-2	0	0	0	0	0	0	0	0	0	0	0
B5MCQ6;B5MCU6;B5MCV5;E7ETT9;Q96DB2;Q96DB2-2	0.585023	-0.583354	0	0	0	0	0	0	0	0	-0.00166905
B5MCX7;C9JX82;D3YTC9;F8WB76;H7C3L3;Q6NXT1;Q6NXT1-2	-1	0	0	1	0	0	0	0	0	0	0
B5MD46;F8W9Y7;F8WCD1;H0Y2U5;H0Y5R9;H7C1Q1;H7C471;Q9BXI6;Q9BXI6-2	-0.191465	0	0	0	0.0547183	-0.0124457	0	0	0	0	0.149193
B5MDF5;J3KQE5;P62826	0	0	0	0	0	0	0	0	0	0	0
B5MDL5;P53778;P53778-2	0.603684	0	0	-0.603684	0	0	0	0	0	0	0
B5MDU6;Q9H6V9;Q9H6V9-2	0.153976	-0.527029	0	0	0	0.373053	0	0	0	0	0
B5ME97;E7EW69;E7EX04;Q9P0V9;Q9P0V9-2;Q9P0V9-3	0	0	0.146094	0	0	0	-0.146094	0	0	0	0
B5MEF5;Q8TER0;Q8TER0-3;Q8TER0-4;Q8TER0-5	0	0.268304	0	0	0	-0.265464	0	0	0	0	-0.0028397
B7WNH4;E9PLH2;E9PNA8;E9PP42;M0QYU9;M0R0R3;M0R2G5;Q9BQ49	0	0	0	0	0	0	0	0	0	0	0
B7WNR7;Q5HYL7-4	1	0	0	0	0	0	0	0	0	-1	0
B7WP74;Q9HCG8	0	0	0	0	0	0	0	0	0	0	0
B7WPE2;Q32P44	0	0	0	-0.0712394	0	0	0	0	0.0712394	0	0
B7WPG3;C9IYN3;Q8WVV9;Q8WVV9-4;Q8WVV9-5;V9GYK2	0	0	0	0	0	0	0	0	0	0	0
B7WPL0;Q9NVN3;Q9NVN3-1;Q9NVN3-3	1	0	0	0	-0.459031	0	0	-0.540969	0	0	0
B7WPL9;F8W9A8;Q6PFW1;Q6PFW1-2;Q6PFW1-3;Q6PFW1-4;Q6PFW1-5;Q6PFW1-6;Q6PFW1-7	0.338663	0	-1	0.661337	0	0	0	0	0	0	0
B7Z278;Q8WZA2;Q8WZA2-2;Q8WZA2-3;Q8WZA2-4;Q8WZA2-5
B7Z2R2;P14927;P14927-2	0	0	0	0	0	0	0	0	0	0	0
B7Z2R7;Q5T8D3;Q5T8D3-2;Q5T8D3-3	0	0	0	0	0	0	0	0	0	0	0
B7Z2X5;H0YDC6
B7Z493;E9PJX4;F8VWL3
B7Z4L1;B7Z4U3;E7EPD9;E7EPW5;E9PCV1;G3XAH9;H7BXS2;Q9NRC1-2;Q9NRC1-3;Q9NRC1-4;Q9NRC1-5;Q9NRC1-6	0	0.496587	0	0	0	0	0	0	0	-0.496587	0
B7Z4S1	1	0	0	0	0	0	0	-0.395542	-0.604458	0	0
B7Z4W8;E9PD09;Q96HH9;Q96HH9-2;Q96HH9-3;Q96HH9-4;Q96HH9-5	-0.438934	0.519059	0	0	-0.561066	0	0	0	0	0	0.480941
B7Z5P7;O60711;O60711-2	-1	0	0	0	0	0	0.584188	0	0	0	0.415812
B7Z6D5;Q96GQ7	0	0	0	0	0	0	0	0	0	0	0
B7Z6J7;H7C148;O75175
B7Z6Q0;Q12980
B7Z7D2;E9PQY3;P11117	0	-0.47649	0	0	0	0.716674	0	0	0	0	-0.240184
B7Z7P8;P62495;P62495-2
B7Z8H2;O14717;O14717-2;O14717-3;O14717-4;O14717-5;O14717-6;Q7Z3E4
B7Z8Q8;Q6NUS8	0	-0.261566	0	0	0	0	0	0	0	0	0.261566
B7Z9C2;F5H4R6;F8VV59;F8VY35;F8W020;F8W0J6;F8W118;F8W543;H0YH88;H0YHC3;H0YIV4;P55209;P55209-2
B7Z9I1;P11310;P11310-2;Q5T4U5	0	0	0	0	0	0	0	0	0	0	0
B7ZAP0;F5H8L0;Q5R372-5;Q5R372-6;Q5R372-7;Q5R372-8	0	0	0	0	0	0	0	0	0	0	0
B7ZAQ6;B7ZAQ6-2;B7ZAQ6-3;P0CG08	0	-1	0	0	1	0	0	0	0	0	0
B7ZBB8	0	0	0	-0.614766	0	0	0	0.385256	0.22951	0	0
B7ZBC8;B7ZBC9;O75449	-0.431507	0	0	0	0	0	0	0	0	0	0.431507
B7ZC38;Q9NR46	0	0	0	0	0	0	0	0	0	0	0
B7ZKQ9;Q8WTV0-2;Q8WTV0-4	0	0.197859	0	0	0	-0.284866	0	0	0	0	0.0870076
B7ZL88;Q8N8Q8	0	0	0	0	0	0	0	0	0	0	0
B7ZLQ8;E5RJM0;Q17RY0;Q17RY0-2	0	0	0	0	0	0	0	0	0	0	0
B7ZM68;Q6ZNL6;Q6ZNL6-2	-0.428519	0	0	0	-0.199741	0	0	0	0	0	0.62826
B8ZZ19;H0Y3U0;P20472	0	0	0	0	0	0	0	0	0	0	0
B8ZZ47;H0Y714;Q96G21	0	0	0	0	0	0	0	0	0	0	0
B8ZZ50;B9A044;C9JEL3;O60573;O60573-2	-1	0.621781	0	0	0	0	0	0	0	0	0.378219
B8ZZ98;Q8WVK2	0	0	0.603237	0	-0.603237	0	0	0	0	0	0
B8ZZ99;F8WCZ3;Q96NT0;Q96NT0-2	0	0.0683378	0	0	-0.468279	0.399941	0	0	0	0	0
B8ZZD4;Q86VP1;Q86VP1-2;Q86VP1-3;Q86VP1-4	1	0	0	0	0	-0.500777	0	0	0	0	-0.499223
B8ZZF5;C9J5M4;Q9H8M9	0	0.517793	0	0	0	-0.433619	0	0	0	0	-0.0841743
B8ZZJ6;H7C1S9;Q8TD22	0	0	0	0	0	0	0	0	0	0	0
B8ZZK5;O43924
B8ZZQ6;P06454;P06454-2	0	0	0	0	0	0	0	0	0	0	0
B8ZZU8;Q15370;Q15370-2	0	0	0	0	0	0	0	0	0	0	0
B8ZZV9;B8ZZX2;Q9H8M1;Q9H8M1-2	0	0	0.243631	0	0	0	0	0	0	-0.243631	0
B8ZZY8	0.334564	0	0	0	0	0	0	0	-0.334564	0	0
B8ZZZ1;F8W8K9;G5E966;Q96PC3;Q96PC3-2;Q96PC3-3;Q96PC3-4	0	0	0	0	-0.300662	0	0	0.300662	0	0	0
B9A063;Q6PIF6	0	0	1	0	-0.528358	0	0	0	0	-0.471642	0
B9EGA3;J3KMX2;Q92925;Q92925-2;Q92925-3	0	0	0	0	0	0	0	0	0	0	0
B9EJG8;B9EJG8-2;D6RAQ9;D6RDW6	0	0	0	0	-0.423517	0	0	0.423517	0	0	0
B9ZVN9;O95602	0	0	-0.249802	0	0	0	0	0	0	0	0.249802
C4AMC7;Q6VEQ5	0	0	0	0	-0.473685	0.545781	0	-0.0720968	0	0	0
C4B7M2;Q96JI7;Q96JI7-2;Q96JI7-3	0.119722	0	0	0	-0.119722	0	0	0	0	0	0
C4P0D6;C4P0D8;Q99598	0	0	0	0	0	0	0	0	0	0	0
C9IYN7;C9J2D6;C9J9N8;C9JA82;C9JEX8;C9JLH5;Q0PNE2;Q0PNE2-2	0	0	0	0	0	0	0	0.215099	-0.215099	0	0
C9IYT0	0	0	0.571508	0	-0.571508	0	0	0	0	0	0
C9IZ93;C9J9P8;C9JF62;Q969M7;Q969M7-2;Q969M7-3;Q969M7-7
C9IZF6;P41247	0	0	0	0	0	0	0	0	0	0	0
C9IZU8;C9J9T0;Q96AT9	0	0	0	0	0	0	0	0	0	0	0
C9J050;C9JEJ2;P49585	0	0	0	0	0	0	0	0	0	0	0
C9J066;E9PN67;Q8N4C6;Q8N4C6-10;Q8N4C6-11;Q8N4C6-2;Q8N4C6-4;Q8N4C6-5;Q8N4C6-6;Q8N4C6-7;Q8N4C6-9	-1	0	1	0	0	0	0	0	0	0	0
C9J0A4;P57723;P57723-2	0	0	0	0	0.160847	-0.523534	0	0.362687	0	0	0
C9J0A7;Q9UQN3;Q9UQN3-2	0	0	0	0	0	0	0	0	0	0	0
C9J0I9;Q86WB0;Q86WB0-2;Q86WB0-3	0	0	0.472938	0	0	0	-0.472938	0	0	0	0
C9J0J0;Q96EE4	0	0	0	0	0	0	0	0	0	0	0
C9J0J7;G5E9Q6;P35080-2	0	0	0	0	0	0	0	0	0	0	0
C9J0K6;P30626;P30626-2;P30626-3	0	0	0	0	0	0	0	0	0	0	0
C9J159;F5H6W4;Q9H992
C9J165	0	0	0	0	-0.290104	0	0	0.236619	0.0534854	0	0
C9J1C6;Q9P0P0	0	0	0	0.322439	0	0	0	0	-0.322439	0	0
C9J2C0;Q9NY65;Q9NY65-2
C9J2P9;Q75N03;Q75N03-2	0	0	1	0	0	-0.520819	0	0	0	0	-0.479181
C9J2Y9;P30876	0	0	0	0	0	0	0	0	0	0	0
C9J365;C9JA28;Q9UNL2;Q9UNL2-2	0	0	0.344878	0	-0.358257	0	0	0	0	0	0.0133789
C9J3D7;Q9UKG9;Q9UKG9-3	0	0	0	0	0	0	0	0	0	0	0
C9J3R8;E7ETS9;O60513	0	0	0	0	0	0	0	0	0	0	0
C9J406	0	0	0	0	0	0	0	0	0	0	0
C9J494;Q9H000;Q9H000-2
C9J4X5;Q96EU6;Q96EU6-2;Q9H160;Q9H160-2	0	0	-0.21746	0	0.21746	0	0	0	0	0	0
C9J4Z3;P61513	0	0.506652	0	0	0	0	0	0	0	-0.506652	0
C9J555;J3QLM1;J3QLS1;Q14849	0	0	0	0	1	0	0	0	-1	0	0
C9J597;C9JF31;Q9BV87	0.354428	0	-0.257392	0	0.645572	0	0	0	-0.742608	0	0
C9J5D1;E7EQ69;Q9GZZ1	0	0	0	0	-0.483515	0	0	0.483515	0	0	0
C9J5N1;Q9BTE6;Q9BTE6-2;Q9BTE6-3	0	0	0	0	0	0	0	0	0	0	0
C9J6G3;C9J7M1;O95749	0	0	0	0.355416	0	0	0	0	-0.355416	0	0
C9J6K0;Q13103	-0.100368	0	0	0	0	-0.49071	0	0	0	0.591078	0
C9J6K3;C9JM54;Q9HC52	0	0	0	0	0	0	0	0	0	0	0
C9J6P4;Q7Z2W4	0	0	0	0	0	0	0	0	0	0	0
C9J6W0	-0.192859	0	0	0	-0.389063	0	0.581922	0	0	0	0
C9J712;P35080	0	0	0	-0.0671217	0	0	0	0	0.0671217	0	0
C9J758;Q969T7;Q969T7-2	0	0	0	0	0	0	0	0	0	0	0
C9J798;E5RK78;E7ERK1;F5GXT2;F8W6L0;O43374;O43374-2	0	0	-0.377035	0	0	0	0	0	0	0.377035	0
C9J7E5;Q9Y5L0;Q9Y5L0-1	0	0	0	0	0	0	0	0	0	0	0
C9J7E8;Q9UL63;Q9UL63-2	0	0	0	0	0	0	0	0.298129	-0.298129	0	0
C9J7K9;C9J9P4;H7C5I5;O15162;O15162-2	0	0.0370161	0	0	0	0	0	0	0	0	-0.0370161
C9J813
C9J8S2;Q99969	0	-0.292457	0	0	0.292457	0	0	0	0	0	0
C9J8T4;C9JYN7;O43567	0	0	0	0	0.154341	-0.154341	0	0	0	0	0
C9J975;E7ESL9;Q96P47;Q96P47-2;Q96P47-3;Q96P47-4;Q96P47-6	0.0726314	0	0	0	0	0	0	0	-0.0726314	0	0
C9JA08;Q96D46	0	0	-0.355269	0	0	0	0	0.402484	-0.047215	0	0
C9JA90	0.463652	0	0	0	-1	0	0	0	0	0	0.536348
C9JAX1;Q16595	0	0	0	0	0	0	0	0	0	0	0
C9JB28;C9JPS5;Q6ZMH5	0	-0.0465497	0	0	0	0	0	0	0	0	0.0465497
C9JB30;Q9UPY8	0	0	0	0	0	0	0	0	0	0	0
C9JBG5;E9PMC3;F5H8L4;Q8NBJ9;Q8NBJ9-2	0	0	0	0	0.358267	0.321617	0	-0.679884	0	0	0
C9JBI3;P78330	0	0	0	0	0	0	0	0	0	0	0
C9JBY7;Q9Y291	0	0	0.257028	0	0	0	0	0	0	-0.257028	0
C9JCC6;E9PQX9;Q14919;Q14919-2
C9JCU6;F2Z2B3;F8WCP4;Q12851;Q12851-2	0	0	-0.282513	0	0.318424	0	0	0	-0.0359103	0	0
C9JD37	0	0	0	0	0	0	0	0	0	0	0
C9JDZ2;Q9NVQ4;Q9NVQ4-2;Q9NVQ4-3	-0.524932	0	0	0.524932	0	0	0	0	0	0	0
C9JEG3;Q9UBQ6	0	0	0	0	0	0	0	0	0	0	0
C9JEH3;C9JG97;Q13685	0	0	0	0	0	0	0	0	0	0	0
C9JEK0;C9JP86;Q08AI8	0.321846	0	0	0	0	0	0	0	-0.321846	0	0
C9JER6;P61366	-0.367214	0	0	0	0	-0.335945	0	0	0.638936	0	0.0642231
C9JF50;E9PLU1;E9PRK5;E9PRW1;E9PSD6;Q9H019;Q9H019-2;Q9H019-3	0	-0.524763	0	0	0	-0.475237	0.372119	0	0	0.413905	0.213975
C9JFE4;Q13098;Q13098-5;Q13098-7	0	0	0	-0.0140142	0	0	0	0	0.0140142	0	0
C9JFR7;P99999	0	0	0	0	0	0	-0.1674	0	0	0.1674	0
C9JFV4;Q8IZL8	0	0	0	0	0	0	0	0	0	0	0
C9JFX4;E9PLG6;E9PSD9;Q6IA17;Q6IA17-2	0	0	0	0	0.487417	0.250556	0	-0.737973	0	0	0
C9JG87;Q9NYK5;Q9NYK5-2	0	0	0	0	0	0	0	0	0	0	0
C9JH00;O75155;O75155-2	0	0	0	0	0	0	0	0	0	0	0
C9JHD7;C9JJK9;Q86YP4;Q86YP4-2;Q86YP4-3	0	0	0	0	0	0	0	0	0	0	0
C9JIF9;P13798	0	0	0	-0.00693375	0	0	0	0	0.00693375	0	0
C9JIT1	0.418321	0	0	0	0.120126	-0.293915	0	-0.244533	0	0	0
C9JIZ6;P07602;P07602-2;P07602-3	0	-1	0	0	0	1	0	0	0	0	0
C9JJ19;P82930	0	0	0	0	0	0	0	0	0	0	0
C9JJM2;Q96MV1;S4R434	0.264721	-0.689409	0	0	0.111921	0	0	0	0	0	0.312767
C9JJN9;Q8N3P4;Q8N3P4-2;Q8N3P4-3	0	0	0	0	0	0	0	-0.0342519	0.0342519	0	0
C9JJT5;G3V325;P56134-2;P56134-4	0	0	0	0	0	0	0	0	0	0	0
C9JJX6;E9PDC3;O00192;O00192-2	0	0.378716	0.234379	0	0	-0.28001	0	0	0	-0.236365	-0.0967215
C9JK83;O95630;O95630-2	0	0	0	0.427532	0	0	0	0	-0.427532	0	0
C9JKL2;C9JPX5;O95772;O95772-2	-0.218472	0	0	0	0.755563	-0.293685	0	0	0	0	-0.243405
C9JLB7;Q96HP4;U3KQU8	0	0	0	0	0	0	0	0	0	0	0
C9JLU1;P52434;P52434-4	0	0	-0.0957888	0.0957888	0	0	0	0	0	0	0
C9JLW8;I3L2L5;I3L4Q0	0.572584	0	0.427416	0	0	0	0	-0.33671	-0.66329	0	0
C9JNE2;Q9Y530	0.357083	0	-1	0	0.642917	0	0	0	0	0	0
C9JNW5;C9JXB8;P83731	0	-0.220144	0	0	0	0	0.372719	0	0	-0.152575	0
C9JNZ0;C9JRY4;Q96IW7	-0.204391	0	0.434781	0	0.0450523	-0.275442	0	0	0	0	0
C9JP16;O75718	0	0	0	0	0	0	0	0	0	0	0
C9JP85;Q16656;Q16656-2;Q16656-4	0	0	0	0	0	0	0	0	0	0	0
C9JPG5;Q13275;Q13275-2	-1	0	0	0.619869	0	0	0	0	0.380131	0	0
C9JQ41;H7C525;Q4VC31	0	0	0	0	0	0	-0.590718	0	0	0.590718	0
C9JQ60
C9JQD4;O43447	0	0	0	0	0	0	0	0	0	0	0
C9JQI7;C9JQI7-2;D6RC30	0	0.0170752	0	0	0	-0.038359	0	0	0	0	0.0212838
C9JQS9;E7ETT1;E7ETT4;E7EX59;E9PDR0;P05166;P05166-2	0	0	0	0	0	0	0	0	0	0	0
C9JQV0;H7C0T1;H7C2R9;Q9BRJ6	0	0	0	0	0	0	0	0	0	0	0
C9JR56	0	0	0	0	0	0	0	0	0	0.225262	-0.225262
C9JRD2;P25686;P25686-2	0	0	0	0	0	0	0	0	0	0	0
C9JRZ6;Q9NX63	0	0	0	0	0	0	0	0	0	0	0
C9JS50;Q687X5
C9JSU1;Q9Y608;Q9Y608-2;Q9Y608-4;Q9Y608-5
C9JUQ8	-0.478873	0	0	0	0	0	0	0.313635	0.165238	0	0
C9JW74;C9JWU9;Q5EB52;Q5EB52-2;Q5EB52-3	0	0	0	0	0	0	0	0	0	0	0
C9JXM5;G5E9W1;Q7Z3E1
C9JY79;M0QZQ3;Q9H254;Q9H254-4	0	0	-0.254805	0	0	-0.266413	0	0	0	1	-0.478782
C9JYJ6;Q4L180-3;Q4L180-5;Q4L180-7	0	0	0	0	0	0	0	0	0	0	0
C9JYM0;O75817	0	-1	1	0	0	0	0	0	0	0	0
C9JYS5;J3KS67;J3QL47;J3QL63;K7ENL4;Q96ET8-3;Q9NYZ1	0	0	0	0	0	0	0	0	0	0	0
C9JZ38
C9JZB3;Q16821	-0.248305	0	0	0	0	0	0	0	0	0.160941	0.0873639
C9JZF7;G5E9W2;Q9P2E5;Q9P2E5-2	0	0	0	0	0	0	0	0	0	0	0
C9JZG9;C9JZY6;P62256	0	0	0	0	0	0	0	0	0	0	0
C9JZI1;P35249;P35249-2	0	0	0.278063	0	0	0	0	0	0	0	-0.278063
C9JZI7	0	0	0	0	0	0	0	0	0	0	0
C9JZR2;O60716;O60716-10;O60716-11;O60716-13;O60716-2;O60716-3;O60716-5;O60716-9	0	0.34238	0.22029	0	0	-0.422671	0	0	0	0	-0.139998
C9K058;Q9H2H8	0	0	0	0	0	0	0	0	0	0	0
C9K0C8;Q9NS00;Q9NS00-2	0	0	0	0	0	0	0	0	0	0	0
C9K0I9	0	0	-0.309424	0	0	-0.244199	0.378124	0	0	0	0.175499
D3DQV9;H0Y3P2;P78344;P78344-2
D3DUJ3;K7EIE9;K7EQG9;P17706;P17706-2;P17706-3;P17706-4	0	0.40268	0	0	0.237646	0	0	-1	0	0	0.359674
D3DWX8;P98173;P98173-2;P98173-3;Q5HY75	0	-0.402623	0	0	0.402623	0	0	0	0	0	0
D3YTA9;F6U1T9;P63098	0	0	0	0	0	0	0	0	0	0	0
D3YTC7;Q9UBM1;Q9UBM1-2;Q9UBM1-3
D5H3J5;Q2L6G2	0	0	-0.474451	0	0	-0.19404	0.346087	0	0	0.293378	0.0290256
D6R927;D6R946;D6R9K5;D6R9X3;D6RA45;D6RAT2;D6RB37;D6RBQ8;D6RCM1;D6REC2;D6REP3;D6RF98;D6RIV8;D6RIZ8;Q06330;Q06330-4;Q06330-5;Q06330-6;Q06330-7	0	0	0	0	0	0	0	0	0	0	0
D6R938;Q13557;Q13557-10;Q13557-11;Q13557-12;Q13557-3;Q13557-4;Q13557-5;Q13557-6;Q13557-8;Q13557-9
D6R9C7	0.385172	0	0	0	-0.385172	0	0	0	0	0	0
D6R9P3	0	0	0	0	0	0	0	0	0	0	0
D6R9P8;Q6AWC2;Q6AWC2-4;Q6AWC2-6	0	0	0	0	0	0	0	0.355503	-0.355503	0	0
D6R9S2;D6RIC1;H0Y8L2;H0YEZ3;H0YJP6;P59282	1	0	0	-0.696951	0	0	0	-0.303049	0	0	0
D6R9S7;D6RDB0;D6RHE3;Q96GZ6;Q96GZ6-2;Q96GZ6-5;Q96GZ6-6;Q96GZ6-7;Q96GZ6-9	0	0.496394	-0.354094	0	-0.424462	0	0	0	0	0	0.282162
D6R9Z7;P15954	0	0	0	0	0	0	0	0	0	0	0
D6RA47;D6RE79;D6RIZ4;Q14728	0	-1	0	0	0	0	0	0	0	0	1
D6RA57;D6RC31;D6RE67;H0Y9X1;Q96EY4	0	0	0.351136	0	0	0	0	0	0	0	-0.351136
D6RA82;P12429	0	0	0	0	0	0	0	0	0	0	0
D6RA96;Q9NZ71;Q9NZ71-2;Q9NZ71-4;Q9NZ71-6;Q9NZ71-7;Q9NZ71-8;X6R5I7
D6RAD4;P50613	0	0	0	0	0	0	0	0	0	0	0
D6RAD5	0	0	0	0	0	0	0	0	0	0	0
D6RAJ6;Q9UKT5;Q9UKT5-2	0.450916	0	0	-1	0.549084	0	0	0	0	0	0
D6RAN1;D6RF83;D6RH06;H7BYK4;Q9NR12;Q9NR12-2;Q9NR12-3;Q9NR12-4;Q9NR12-5;Q9NR12-6	0	0	-0.41095	0	0	0	0.482376	0	0	0.517624	-0.58905
D6RAN8;H7C5U8;Q9P0M9	0	0	0	0	0	0	0	0	0	0	0
D6RAR4;Q04756
D6RAZ3;E7EMP6;Q96FZ2
D6RB81;Q9UHK6;Q9UHK6-5	0	0	0	0	0	0	-0.420195	0	0	0.420195	0
D6RB89;P50120	0	0	0	0	0	0	0	0	0	0	0
D6RBM8	0.391907	0	0	0	0	0	0	0	0	-0.391907	0
D6RBN6	0.429587	0	0	0	0.312003	-0.300591	0	-0.440999	0	0	0
D6RBR7;Q9Y3S2	0	0	0	0	-0.521271	0	0	-0.189961	0.711232	0	0
D6RBW1;P06730;P06730-2;P06730-3
D6RBY0;D6RJG8;Q8TAC1;Q8TAC1-2	0	0	0	0	0	0	0	0	0	0	0
D6RCC4;D6RCC9;Q8NEC7	0.229797	0	0	-0.229797	0	0	0	0	0	0	0
D6RCE7	0	0	0	0	0	0	0	0	0	0	0
D6RCM8;O95379;O95379-2;O95379-3;O95379-4	-0.651296	0	0	0.651296	0	0	0	0	0	0	0
D6RCP5;Q8N264;Q8N264-2;Q8N264-3	0	0	0	0	0	0	0	0	0	0	0
D6RDG3	-0.233205	0.0823978	0	0	-0.287124	0	0	0	0	0	0.437932
D6RDG8;D6RGZ4;O43791
D6RDK6	0.302581	0	0	0	0	-0.356767	0.262829	0	0	0.43459	-0.643233
D6RE84
D6REA0;O75879	0	0	0	0	0	0	0	0	0	0	0
D6REK2;H0Y9T3;Q8WV44;Q8WV44-2;Q8WV44-4	0	0	-0.42776	0	0.42776	0	0	0	0	0	0
D6RER5;D6RGI3;Q9NVA2
D6REX3	0	0	0	0	0	0	0	-0.00717545	0.00717545	0	0
D6REY2;P23508;P23508-2	0	0	0	0	0	0	0	0	0	0	0
D6RF35;P02774;P02774-3	-0.278442	-0.721558	0	0	0	1	0	0	0	0	0
D6RF43	0.361595	0	0.387383	0	-0.474907	-0.274072	0	0	0	0	0
D6RF48;Q9P2W9	0	0	0	0	0	0	0	0	0	0	0
D6RF86;P55285;P55285-2	0	0	0	0	1	-1	0	0	0	0	0
D6RFG8;P27707
D6RFI1	0	0	-0.615106	0	0.615106	0	0	0	0	0	0
D6RFI3;E7EQR8;Q9GZM5	0	0	0	0	0.0219122	0	0	-0.0219122	0	0	0
D6RGG3;Q99715;Q99715-4	0	0	0.374729	0	0	-0.285435	0	0	0	-0.320091	0.230797
D6RGK3;D6RHW1;D6RIE8;D6RIV9;D6RIY1;Q16594;Q9HBM6	0	0	0	0	0	0	0	0	0	0	0
D6RGK9;H0Y9C1;H0Y9Z5;Q96LI5
D6RGZ3;Q8N1W1;Q8N1W1-3;Q8N1W1-4;Q8N1W1-5;Q8N1W1-6	0.516697	0	-0.220138	0	0	-0.336919	0	0	0	0.0403607	0
D6RH21	0	0	1	0	-1	0	0	0	0	0	0
D6RHG0;P78383	0	-1	0	0	0	1	0	0	0	0	0
D6RHH9;Q8TCT1;Q8TCT1-2;Q8TCT1-3	0	0	0	0	0	0	0	0	0	0	0
D6RHX8;F8W9W2;P43250;P43250-2;P43250-3	0	0.4434	-0.333995	0	0	0	0	0	0	0	-0.109405
D6RID8;Q13888;Q6P1K8	0	0	0.390308	0	0	0	0	0	0	0	-0.390308
D6RIE3	0	0	0	0	0	0	0	0	0	0	0
D6RIG4;Q9HCL0;Q9HCL0-2	0	0	0	0	0	0	0	0	0	0	0
D6RIT3;Q8N1A6	0	0	0	0	0	0	0	0	0	0	0
D6RIY6;Q06265;Q06265-2	0	0	0	0	0	0	0	0	0	0	0
D6RJ90;Q9Y6G5	0	0	0	0	-0.187506	0.385487	0	-0.197981	0	0	0
D6RJG9;Q9Y5W7;Q9Y5W7-2;Q9Y5W7-3;Q9Y5W7-4	0	0.398042	0	0	0	0	0	0	0	0	-0.398042
E1CKY7;O60237;O60237-4;O60237-6	0	0	0	0	0	0	0	0	0	0	0
E2QRG8
E2QRK7;Q5JTD0;Q5JTD0-2
E3W980;E3W982;Q8TDG4	1	0	0	0	0	-1	0	0	0	0	0
E5KLJ9;O60313-10;O60313-2;O60313-9	0	0	0	0	0	0	-0.313573	0	0	0.313573	0
E5RFE0;E5RGT8;Q9UQ10	0	0	0	0	0	0	0	0	0	0	0
E5RFF8;J3KNU2;Q8IX29;Q8IX29-2	0	0	0	0	0	0	0	0	0	0	0
E5RFT4;Q8N4L2	-1	0	0	0	0	0.495436	0	0.504564	0	0	0
E5RFV7;O00300	0	0	0.378263	0	0	0	0	0	0	-0.378263	0
E5RG15;E5RHB3;Q8NBP0;Q8NBP0-2	0	0	-0.0710599	0	0	0	0.398995	0	0	0	-0.327935
E5RG17;G5EA19;H0YBX2;Q6P1N9;U3KQS5	0	0	0	0	0	0	0	0	0	0	0
E5RG29	0	0.0135563	0	0	0	-0.297553	0	0	0	0	0.283996
E5RG44;E5RGJ1;E5RIT1;Q629K1	0	-0.38522	0	0	0	0	0	0	0	0.38522	0
E5RGB7;E5RGH1;H0YBV9;Q7Z388	-0.431137	0.393706	0	0	0.186885	-0.39641	0	0	0	0	0.246956
E5RGU4
E5RGZ2;H0YKJ1;Q6NT76;Q6NT76-2;Q6NT76-3;Q6NT76-5	0	0	0.337791	0	0	0	0.321742	0	0	-1	0.340467
E5RHC5;Q8N6T3;Q8N6T3-3	0.580109	0	0	-0.580109	0	0	0	0	0	0	0
E5RHG8;Q15369	0	0	0	0	0	0	0	0	0	0	0
E5RHW4;O94905	-0.223454	0.223454	0	0	0	0	0	0	0	0	0
E5RIA2;E7EUF1;Q13822;Q13822-2;Q13822-3	0.358111	0	0	0	-0.470413	-0.529587	0	0.321252	0	0	0.320637
E5RIA9;Q9UJ68;Q9UJ68-5	0	0	0	0	0	0	0	0	0	0	0
E5RIH5;Q6NXR4	0	0	0	0	0.180536	0	0	0.293316	-0.473851	0	0
E5RIK6	-0.327751	0	0.252864	0	0.0748866	0	0	0	0	0	0
E5RIT6;Q9UNX3	0	0.579609	0	0	0	0	0	0	0	-0.579609	0
E5RIW3;E5RJD8;O75347	0	0	0	0	0	0	0	0	0	0	0
E5RIW9;P28328	0	0	0	0	0	-0.37114	0.651618	0	0	0	-0.280478
E5RJ29;Q9NYI0;Q9NYI0-2	0	0	0	0	0	-0.273188	0	0	0	-0.259535	0.532723
E5RJ36;H0YAX6;Q14CS0
E5RJF8;E5RK82;O15182	0	0	0.346755	0	0	-0.346755	0	0	0	0	0
E5RJN7;E7EPX0;E7EVI1;E7EVJ4;Q9NUL3;Q9NUL3-2;Q9NUL3-3;Q9NUL3-6;Q9NUL3-7;Q9NUL3-8	0	-0.0855175	0	0	0	-0.288886	0.374403	0	0	0	0
E5RK69	0.722749	0	0	-0.722749	0	0	0	0	0	0	0
E7EM64;Q7L5N1
E7EM72;E7EWQ4;O75912
E7EMB1;Q9UH65	0	0	0	0	0	0	0	0	0	0	0
E7EMC7;Q13501	0	0	1	0	0	0	0	0	0	0	-1
E7EMD6;O43572	0	0	0	0	-1	0	0	0	1	0	0
E7EMK3;J3QLD9;Q14254	0	0.402686	0.243624	0	0	-0.428681	0	0	0	0	-0.217629
E7EMS2;G3V3D1;G3V3E8;J3KMY5;P61916	-0.278011	0	0	0	0.401175	0.203757	0	0	0	0	-0.32692
E7EMT5;P04798	0	-0.187799	0	0	-0.0850652	0	0	0	0	0	0.272865
E7EMT6;E7ENY2;E7EQA9;E7EV32;E7EVA2;E7EW82;H7C3L4;Q92844
E7EMZ9;E9PBC6;O95359;O95359-3
E7EN24;Q12864	0.285592	0	0	0	-0.127214	-0.273955	0	0	0	0	0.115577
E7EN73;Q8IZA0;Q8IZA0-2	0	-0.623194	0	0	0.264978	0.358216	0	0	0	0	0
E7EN91;Q9BWF2	0	0	0	-0.644153	0	0	0	0	0.644153	0	0
E7END6;P04070;P04070-2	0	0	0	0	0	0	0	0	0	0	0
E7ENL6;P12111;P12111-2;P12111-4	0	0	-0.461485	0	0	0	0	0	0	0.461485	0
E7ENT5;E7EV45;Q9ULF5	-0.30263	0	0	0	0	-0.0082663	0	0	0	0	0.310897
E7ENV7	0	0.563672	0	0	0	-1	0	0	0	0	0.436328
E7ENY0;E7EV99;P35611;P35611-2;P35611-3;P35611-6	0	0	-1	0	0	0	1	0	0	0	0
E7EP17;Q9NYC9;Q9NYC9-2
E7EP72;Q9UFG5	0	-0.645273	0	0	-0.354727	1	0	0	0	0	0
E7EPB3;P50914	0	0.101301	0	0	0	0	0.356695	0	0	-0.457996	0
E7EPG1;Q13201	0	0	-0.710448	0	0	0	0	0	0	0.373503	0.336946
E7EPI0;Q9P2D0	0	0.457707	0	0	0	-0.233493	0	0	0	0	-0.224214
E7EPK1;E7ES33;Q16181;Q16181-2	0	0	-1	0	0	0	1	0	0	0	0
E7EPN9;Q9Y520;Q9Y520-4;Q9Y520-5;Q9Y520-6;Q9Y520-7
E7EPS8;P28827;P28827-2	0	0	-1	0	0	0	0	0	0	0	1
E7EPT4;P19404	0	0	0	0	0	0	0	0	0	0	0
E7EQB2;E7ER44;P02788;P02788-2	0	0	0.262742	0	0	-0.253053	-0.080153	0	0	0	0.0704644
E7EQH1;E9PMB7;E9PR55;Q8NFJ9;Q8NFJ9-2;Q8NFJ9-3	0.202259	0	-0.351386	0	0	0	0	0	0	0.149127	0
E7EQM8;J3QRM6;J3QS93;P43146	0	0	0	0	-1	0	0	0.403191	0.596809	0	0
E7EQQ5;Q9C035;Q9C035-2;Q9C035-3;Q9C035-4;Q9C035-5;Q9C035-6	0	0	0	-0.46704	0	0	0	0	0.46704	0	0
E7EQT3;Q9BY07-5	0	0	0	0	0	0	0	0	0	0	0
E7EQT4;Q9UKV3;S4R3H4	0	0	0	0	0	0	0	0	0	0	0
E7EQU1;E7ES08;E9PES6;O15347	0	0	0	0	0	0	0	0	0	0	0
E7EQY1;Q96C01	0	0	0	0	0	0	-0.531748	0	0	0.531748	0
E7ER45;O43451	0	0	0	0	0	-0.50193	0	0	0	0	0.50193
E7ER77;Q7Z2K6	0	-0.472837	0	0	0	0	0.472837	0	0	0	0
E7ERI8;E7EW49;O75122-3
E7ERS3;Q86VM9	0	0	-0.196751	0	0	0	0	0	0	0.52928	-0.332529
E7ES96;P49768;P49768-2
E7ESA6;H0YBP1;Q05397;Q05397-7
E7ESA7;P29474	-0.420494	0.421644	0	0	0	0	0	0	0	0	-0.00115025
E7ESC6;Q9UIA9	0	0	0	-0.339567	0	0	0	0	0.339567	0	0
E7ESD2;Q641Q2;Q641Q2-2	0	0	0	0	-0.4858	1	0	-0.5142	0	0	0
E7ESF6;Q13094	0	0	-0.07442	0	0	0	0	0	0	0.07442	0
E7ESK6;E9PBI9;P34741	0	-0.610752	0	0	0.351824	0.312856	0	0	0	0	-0.0539279
E7ESL0;J3KQY1;Q9NWU5;Q9NWU5-2;Q9NWU5-3	0	0	0	0	0	0	0	0	0	0	0
E7ESP4;P17301	0	0.334395	-0.288104	0	0.0387929	0	0	0	0	-0.337588	0.252505
E7ESS3;K7EKW3;Q71RG4;Q71RG4-2	0	0.0744624	0	0	-0.320593	0	0	0	0	0	0.24613
E7ESU7	0	0	0	0	0	0	0	0	0	0	0
E7ESY4;H0Y4T7;Q13330;Q13330-3	0	0	0.285728	0	0	0	0	0	0	0	-0.285728
E7ET49;Q8NCG7;Q8NCG7-2;Q8NCG7-4	0	0	0	0	0.528433	0	0	-0.528433	0	0	0
E7ET87;E7EVI4;O75410;O75410-10;O75410-2;O75410-3;O75410-4;O75410-5;O75410-6;O75410-7;O75410-9
E7ETB3	0	0	0	0	0	0	0	0	0	0	0
E7ETH0;G3XAM2;P05156	-0.232582	0.232582	0	0	0	0	0	0	0	0	0
E7ETM6;Q8N2H4	0	0	0	0	0	0	0	0	0	0	0
E7ETU5;F6Y5H0;P29558;P29558-2
E7ETU7;H0Y9G6;P09001	0	0	0	0	0	0	0	0	0	0	0
E7ETY4;E9PC69;Q7KZI7;Q7KZI7-10;Q7KZI7-11;Q7KZI7-12;Q7KZI7-13;Q7KZI7-14;Q7KZI7-15;Q7KZI7-16;Q7KZI7-2;Q7KZI7-3;Q7KZI7-4;Q7KZI7-5;Q7KZI7-6;Q7KZI7-7;Q7KZI7-8;Q7KZI7-9
E7ETZ4;Q9Y6E2
E7EU05;E9PLT1;P16671;P16671-3	0	0.12622	0	0	0	-0.29057	0	0	0	0	0.164351
E7EU13;Q96P48;Q96P48-1;Q96P48-2;Q96P48-3;Q96P48-4	0	0	0	-0.364659	0	0	0	0	0.364659	0	0
E7EU14	0	0	0	-0.331329	0	0	0	0	0.331329	0	0
E7EUH7;Q96PZ0;Q96PZ0-2	0	0	0	0	0	0	0	0	0	0	0
E7EUJ7;Q8TC20;Q8TC20-2;Q8TC20-3;Q8TC20-5	0	0	0	0	0	0	0	0	0	0	0
E7EUU4;Q04637-8
E7EUW0;H0YA74;Q9C0I3;Q9C0I3-2	-0.0925201	0	0	0	0.0925201	0	0	0	0	0	0
E7EV01;O15484	0	0	0.429214	0	0	-0.466993	0	0	0	0	0.0377795
E7EV71;Q14766;Q14766-2;Q14766-4;Q14766-5	0	0	-0.317397	0	0	0	0	0	0	0.345108	-0.0277113
E7EVA0
E7EVC7;Q676U5;Q676U5-2	0	0	0	0	0	0	0	0	0	0	0
E7EVE9;P18074	0.571325	0	-1	0	0	0	0	0	0	0.428675	0
E7EVH7;F8W6L3;G3V2E7;G3V3H3;G3V5R9;Q07866;Q07866-10;Q07866-2;Q07866-3;Q07866-4;Q07866-5;Q07866-6;Q07866-7;Q07866-8;Q07866-9	0	0	0	0	0	0	0	0	0	0	0
E7EVJ5;Q96F07;Q96F07-2	0	0	0	0	-0.056785	0.404614	0	-0.347829	0	0	0
E7EVQ6;Q14534	0.45935	-0.45935	0	0	0	0	0	0	0	0	0
E7EVX8;Q8WWY3	0	0	0	0	0	0	0	0	0	0	0
E7EW05;Q9NVU7;Q9NVU7-2	0	0	0.351387	0	0	0	0	0	0	0	-0.351387
E7EWD3;O75077;O75077-2	0	0.00706178	0	0	0	0	0	0	0	0	-0.00706178
E7EWM1;Q15596	-0.458924	0	0	0	0.458924	0	0	0	0	0	0
E7EWP0;H0Y886;O43674;O43674-2	0	0	0	0	0	0	-0.415287	0	0	0.415287	0
E7EWR4;P33240;P33240-2	0	0	0	0	0	0	0	0	0	0	0
E7EWW0;Q7Z3J2	0	0	0	0	0	0	0	0	0	0	0
E7EWX8	-0.309157	0	0	0	1	-0.337053	0	0	0	0	-0.35379
E7EX17;P23588	0	0	0	0	0	0	0	-0.356567	0.356567	0	0
E7EX40;Q6WKZ4;Q6WKZ4-2;Q6WKZ4-3	0	0	0	-1	0.534551	0	0	0.465449	0	0	0
E7EX44;Q05682-2;Q05682-3;Q05682-6	0	0	-0.484531	0	0	0	0.484531	0	0	0	0
E7EX70;Q9GZS1	0	0	0	0	0	0	0	0	0	0	0
E7EX90;Q14203;Q14203-3;Q14203-4;Q14203-6	0	0	0	0	0	0	0	-0.0240091	0.0240091	0	0
E9PAM5	0.421799	0	-0.425331	0	0	0	0.578201	0	-0.574669	0	0
E9PAV3;E9PAV3-2;F8VZJ2;F8W0W4;H0YHX9;Q13765	0	0	0	0	0	1	0	-1	0	0	0
E9PB18;Q6UXG2;Q6UXG2-2;Q6UXG2-3;Q6UXG2-4
E9PB51;Q9BWF3	0	0	0	0	0	0	0	0	0	0	0
E9PB61;Q86V81	0	0	0	0	0	0	0	0	0	0	0
E9PB90;P52789	-0.73005	0	0	0	0	0	0	0	0.73005	0	0
E9PBC1;F6PQP6;I3L2B2;I3L2H1;I3L356;O95208;O95208-2;O95208-3;O95208-5	0	0.452769	0	0	0	0	0	0	0	0	-0.452769
E9PBF9;H7C2N6;P15336	0.405399	0	0	-0.588124	-0.411876	0	0	0	0.594601	0	0
E9PBP6	0	0	0	0	0	0	0	0	0	0	0
E9PBZ2;P15428;P15428-2;P15428-4	0	0	0	0	0	0	0	0	0	0	0
E9PC53;H7C3N0;Q8TBK2;Q8TBK2-2	0	0	0	-1	0	0	0	0	1	0	0
E9PC61;G4U4J3;Q8NDF8;Q8NDF8-2;Q8NDF8-3;Q8NDF8-5	0	0	-0.687948	0	0	0.311159	0	0	0	0	0.376789
E9PC66;P17029	0	0	-1	0	0.759438	0	0	0.240562	0	0	0
E9PC87;O94876;O94876-2	0	0	0	0	0	0	0	0	0	0	0
E9PC90;H0YA62;P14635;P14635-2	0	0	0	0	0	-0.494612	0	0	0	0	0.494612
E9PCD7;H0YA68;Q9Y2E5;Q9Y2E5-2
E9PCJ7;G3V336;Q8N806	-1	0	0	0	0	0	0	0	0	1	0
E9PCN2;Q02153;Q02153-2	0	0	0	0	0	0	0	0	0	0	0
E9PCP0;F5H0S8;F5H100;F5H8J8;P16520;P16520-2	-0.847415	0.34389	0	0	0	0	0.272576	0	0	0	0.230949
E9PCQ7;F8WD67;F8WD87;O43709;O43709-2;O43709-3	0	0	0	0	-0.395429	0	0	0	0	0	0.395429
E9PCW1;G5E9T8;K7EJC8;O95249	0	0	0	0	0.10751	0.313485	0	-0.420995	0	0	0
E9PCX2;P15121	0	0	0	0	0	0	0	0	0	0	0
E9PCX5	0	0	0	0	0.519528	0	0	0	0	-0.519528	0
E9PD50;Q92540;Q92540-2;Q92540-4	0	0	0	0	0	0	0	1	-1	0	0
E9PD53;Q9NTJ3;Q9NTJ3-2	0	0	0	0	0	0	0.0171232	0	0	-0.0171232	0
E9PD68;Q14194;Q14194-2	0.390455	0	0	0	0.609545	0	0	0	-1	0	0
E9PDE8	0.38237	0	0	0	-0.636418	0	0.61763	-0.363582	0	0	0
E9PDN4
E9PEF1;O00408;O00408-3;O00408-4	0	0	0	0	0	0	0	0	0	0	0
E9PEJ6;H0Y547;P98196	0	0.141798	0	0	0	-0.220125	0	0	0	0	0.0783277
E9PEP6;O14786	0	-0.0685969	0	0	0	0	0	0	0	0	0.0685969
E9PEQ6	0	0	0.745373	0	-0.447702	0	0	-0.297671	0	0	0
E9PER6;O15530;O15530-2;O15530-3	0	0	0	0	0	0	0	0	0	0	0
E9PEW8	-0.168673	0	-0.178963	0	0	0	0	0	0	0.347636	0
E9PEX6;P09622	0	0	0	0	0	0	-0.318051	0	0	0.318051	0
E9PF10;O75694	0	0	0	0	0	0	0	0	0	0	0
E9PF16;Q96CM8;Q96CM8-2;Q96CM8-3	0	0	0	0	0	0	0	0	0	0	0
E9PF19;Q96E41;Q9Y4P3	0	0	0	0	0	0	0	0	0	0	0
E9PFF8	-0.215959	-0.489338	0	0	0.452007	0	0.547993	0	0	0	-0.294702
E9PFK5;P78316;P78316-2	0	0	0	0	0	0	0	0	0	0	0
E9PFK9;Q9UJ41;Q9UJ41-3;Q9UJ41-4	0	0	-0.336706	0.336706	0	0	0	0	0	0	0
E9PFR3;Q14738;Q14738-2;Q14738-3	0	0	0	-0.338588	0	0	0	0	0.338588	0	0
E9PFR9;J3KQJ8;Q96N96;Q96N96-2;Q96N96-3;Q96N96-5;Q96N96-6	0	0	0	0	0	0	0	0	0	0	0
E9PG19;O94868;O94868-2
E9PG32;Q6ZR08	0	0	0	0	0	0	0	0	0	0	0
E9PG40;P05067;P05067-11;P05067-7;P05067-8;P05067-9	-0.310252	-0.265818	0	0	0.273867	0.302202	0	0	0	0	0
E9PG71;P54764;P54764-2	0.279634	0	0.720366	0	0	-0.283604	-0.381505	0	0	0	-0.334891
E9PG73;Q13427	0	0	0	0	0	0	0	0	0	0	0
E9PGC0;P20936;P20936-2;P20936-4	0	0	0	0	0	0	0	0	0	0	0
E9PGM7;O94988;O94988-1;O94988-3;O94988-5;O94988-6	0	0	0	1	0	0	0	-1	0	0	0
E9PGQ0;Q96H78	0	0	0	0	0	0	0	0	0	0	0
E9PGT3;Q15418;Q15418-2;Q15418-4	0	0	0	0	0	0	0	0	0	0	0
E9PGT6;Q99627	0	0	0	0.528102	0	0	0	0	-0.528102	0	0
E9PHI4;O94901-9	0	0	-0.12067	0	0	0	0	0	0	0.0543802	0.06629
E9PHR9;Q9NRQ2;Q9NRQ2-2	0	0	-0.160009	0	0.65694	0	0	0	0	0	-0.496932
E9PHT3;Q8IYS0;Q8IYS0-2
E9PHV5;P28290	0	0	0.266275	0	0	0	0.0173017	0	0	0	-0.283577
E9PHX8;H7C3L9;Q12866	0.180034	0.447569	0	0	0	-0.449007	0	0	0	0	-0.178595
E9PHY5;O43491-4	0	0	0	0	0	0	0	0	0	0	0
E9PHY8;Q8NDA8	0	0	0	0	-0.551901	0	0	-0.0249948	0.576896	0	0
E9PI41	0	0	0	0	0	0	0	0	0	0	0
E9PIC5;Q8N4M1-4;Q8N4M1-5;Q8N4M1-6
E9PIE3;Q969G5	-0.267537	0	0	0	0	5.72791e-05	0	0	0	0	0.26748
E9PIF4;Q99519	0	0.642516	0	0	0	0.357484	-1	0	0	0	0
E9PIG5;O00212
E9PIH9;F8WA39;H0YDX3;Q13613;Q13613-2;Q8NEC6	-0.691018	0.691018	0	0	0	0	0	0	0	0	0
E9PIZ1	0	0	0	1	0	0	0	-1	0	0	0
E9PIZ2;H0YDB8;Q8N3Y3	-1	0	0	0	0	0	0	0.46225	0	0	0.53775
E9PJ55;Q9NUJ3	0	0	0	0	0	0	0	0	0	0	0
E9PJE4;Q9GZQ3	0	0	0	0	0.283604	0	0	-0.283604	0	0	0
E9PJI1;Q92993;Q92993-2;Q92993-3;Q92993-4	0	0	0	0	0	0	0	0	0	0	0
E9PJJ5;E9PK99;E9PMS5;E9PRT1;Q4G0X4	0	0	0	0.473283	0	0	0	0	-0.473283	0	0
E9PJN9	0	-0.648746	0	0	0	0	1	0	0	-0.351254	0
E9PJQ3;Q8N413;Q8N413-4	0	0	0	0	0	0	0	0	0	0	0
E9PJW8;E9PQA6;Q96EY5;Q96EY5-2;Q96EY5-3	0	0	0	0.574935	-0.511997	0	0	-0.488003	0.425065	0	0
E9PK25;G3V1A4;P23528	0	0	0	0	0	0	0	0	0	0	0
E9PK67;E9PNI7;Q53GL7	0	0	0	0	0	0	0	0	0	0	0
E9PK91;Q9NYF8;Q9NYF8-2;Q9NYF8-3	0	0	-0.355815	0	0	0	0	0	0	0.355815	0
E9PKA8;E9PQL5;E9PSC8;Q6ZUT1;Q6ZUT1-2;Q6ZUT1-3	0	0	0.407191	0	-0.262844	-0.421417	0	0	0	0	0.277069
E9PKC0;Q6IQ23;Q6IQ23-2	0	0	0.477778	0	0	-0.31938	0	0	0	-0.272862	0.114463
E9PKE9;G3V148;Q9H920;Q9H920-2
E9PKF6;H7BXH2;Q5H9R7;Q5H9R7-2;Q5H9R7-5;Q5H9R7-6	0	0	0	0	0	0	0	0	0	0	0
E9PKG1;Q99873;Q99873-2;Q99873-3	0	0	0	-0.594434	0	0	0	0	0.594434	0	0
E9PKN0;E9PQ01;O94913	0	0	0.622164	0	-0.550681	0	0	-0.449319	0	0	0.377836
E9PKP7;P17480-2	0	0	0	0	0	0	0	0	0	0	0
E9PKP8;E9PS00;H0YCN1;H0YED5;Q9Y5Q0	0	0.450874	0	0	-0.715833	0	0	0	0	0	0.264959
E9PKS9;E9PQE8;Q9Y296;Q9Y296-2
E9PKT4;Q8N131;Q8N131-2	0	0	0	0	0.472905	0	0	-0.472905	0	0	0
E9PKT9;O96033	0	0	0	0	0	0	0	0	0	0	0
E9PL17;Q92989;Q92989-2	0	0	0.58309	0	0	0	0	0.41691	-1	0	0
E9PL57	0	0	0	0	0	0	0	0	0	0	0
E9PLD0;Q9H0U4
E9PLI6;E9PNH5;E9PS76;Q8N9N8
E9PLK3;P55786	0	0	0	0	0	0	0	0	0	0	0
E9PLN8;F8W9H0;I3L3B4;Q9BQB6;Q9BQB6-2;Q9BQB6-3	0.194407	0.457522	0	0	-0.64503	-0.35497	0.348072	0	0	0	0
E9PLP8;Q12996	0	0	0	0	0	0	0	0	0	0	0
E9PLY5	0	0	0	0.354903	0	0	0	0	-0.354903	0	0
E9PM19;P29597	0.430806	0	0	0	0	-0.419862	0	0	0	0	-0.0109432
E9PM62;Q5T9L3;Q5T9L3-2	0	-0.261799	0.314917	0	0	0	0	0	0	0	-0.0531185
E9PM75;Q9NTG7	0	0	0	0	0	0	0	0	0	0	0
E9PM90;Q9UK41;Q9UK41-2	0	0	0	0	0	0	0	0	0	0	0
E9PMB9;Q16798	0	0	0.0532887	0	-0.355908	0	0	0	0	0.531558	-0.228938
E9PMG5	0	0	0	0	0	0	0	0	0	0.710614	-0.710614
E9PMI6;J3KN38;P54105	0	0	0	0.425557	0	0	0	0	-0.425557	0	0
E9PMJ1;E9PS06;Q15771	-0.151074	0.642822	0	0	-0.491748	0	0	0	0	0	0
E9PMJ5	0	0	0	0	0	0	0	0	0	0	0
E9PMQ6;Q00613;Q00613-2	0.37792	0	0	0.62208	0	0	0	0	-1	0	0
E9PMR4;K4DIA7;P48509	0	0.355044	0	0	0	-0.417452	0.289372	0	0	0	-0.226963
E9PMS6	0	0	-0.423555	0	0	0	0.324035	0	0	-0.218831	0.318352
E9PN76;Q8ND24;Q8ND24-2
E9PN78;Q4KMG0;Q4KMG0-2
E9PN89
E9PNE5;Q9H1C4	-1	0	0	0	1	0	0	0	0	0	0
E9PNL8;Q13574;Q13574-1;Q13574-3;Q13574-4;Q13574-5;Q13574-6;Q13574-7
E9PNP3;E9PR47;Q9H7C9	0	0	0	0	0	0	0	0	0	0	0
E9PPF6	-0.281914	0	0	0	0	-0.358012	0	0	0	0	0.639925
E9PPQ1;J3KNE7;Q16890;Q16890-5	-0.0581682	0	0	0.0581682	0	0	0	0	0	0	0
E9PPZ9;O43292;O43292-2	0.527471	-1	0	0	0.472529	0	0	0	0	0	0
E9PQ59;Q6P4R8;Q6P4R8-2;Q6P4R8-3	0	0	0	0	0	0	0	0	0	0	0
E9PQ73;Q8TDW7;Q8TDW7-1	0	0	0	0.453584	0	0	0	0	-0.453584	0	0
E9PQC9	0	0	0	0	-0.770271	0	0.279625	0	0	0	0.490646
E9PQD7;P15880	0	0.356324	0	0	0	0	0.410561	0	0	-0.766885	0
E9PQM8;E9PRF4;Q15047;Q15047-3	0.208872	0	0	-0.208872	0	0	0	0	0	0	0
E9PQY2;Q9NQP4	0	0	0	0	0	0	0	0	0	0	0
E9PQZ2;Q11206;Q11206-2;Q11206-3;Q11206-4;Q11206-5;Q11206-6;Q11206-7	0	0	0	0	0	0	0	0	0	0	0
E9PR30;P62861	0	-0.0686692	0	0	0	0	0.329863	0	0	-0.261194	0
E9PR76;E9PSH4;Q9H063	0	0	0	0	0	0	0	1	-1	0	0
E9PR92	0	0	1	0	-0.613699	0	0	0	0	0	-0.386301
E9PRP3	0	0	0	0	0	0	0	0	0	0	0
E9PRQ7;Q04323	0	0	0	0.326366	0	0	0	0	-0.326366	0	0
E9PRU1;O95967	0	0	0	-0.406714	0	0	0	0	0.406714	0	0
E9PS41;Q6RFH5;Q6RFH5-2	0	0	0	0	0	0	0	0	0	0	0
E9PS44;Q01628	0	0	0	0	0.412343	0.587657	0	-1	0	0	0
E9PSA5;Q96Q83
E9PSI1	0	0	0	0	0	0	0	0	0	0	0
ENSEMBL:ENSBTAP00000001528	0	0.354232	0	0	0	-1	0.327542	0	0	0	0.318227
ENSEMBL:ENSBTAP00000007350	-0.34835	-0.65165	0	0	0	0	0	1	0	0	0
ENSEMBL:ENSBTAP00000024146
ENSEMBL:ENSBTAP00000024462;ENSEMBL:ENSBTAP00000024466	0	0	0.467263	0	0	-0.197696	-0.380798	0	0	0.321928	-0.210696
ENSEMBL:ENSBTAP00000038329;REFSEQ:XP_001252647	0	0.467816	0	0	-0.315155	-0.460635	0	0	0	0	0.307974
F2Z2H4;J3KPC0;Q5VVY4;Q86XD8	0.348698	0	0.651302	0	-1	0	0	0	0	0	0
F2Z2J1;Q15349;Q15349-2;Q15349-3
F2Z2U4;H0Y4W2;Q9Y4A5;Q9Y4A5-2	0.063708	0	-0.063708	0	0	0	0	0	0	0	0
F2Z2W7;Q8IZ69;Q8IZ69-2	0	0	0	0	0	0	0	0	0	0	0
F2Z2X4;Q9C0E2	0	0	0	-0.574362	0	0	0	0	0.574362	0	0
F2Z2X9	0	-0.627109	0	0	0.212174	0.414935	0	0	0	0	0
F2Z357;J3KPC5;P47736;P47736-4	0	0	0	0	0	0	0	0	0	0	0
F2Z3K0	0	0	0	0	0.619293	0	0	0.380707	-1	0	0
F5GWB9;I3L1L5;I3L2B9;I3L4D7;I3L4R7;I3L517;Q8NHS9;Q8NHS9-2;Q8NHS9-3	0.370109	0	-0.550863	0	0	0	0	0	0	0.180754	0
F5GWI0;F5H2L3	0	0	0	-0.527773	0	0	0	0.285504	0.24227	0	0
F5GWI4;P00813	0	0	0	0	0	0	0	0	0	0	0
F5GX19;F5H3Y3;Q6IAA8	0	-1	0	0	0	1	0	0	0	0	0
F5GX23;F5H5V4;J3KN29;O00233;O00233-2	0	0	0	0.385444	0	0	0	0	-0.385444	0	0
F5GX26;Q7Z3Z4;Q7Z3Z4-2;Q7Z3Z4-3	0	0	0	0	0	0	1	-1	0	0	0
F5GXC5;H3BUJ1;Q8TB96	0	0	0	0	0.348274	0	0	-0.348274	0	0	0
F5GXJ1;F5H5N1;O75251;O75251-2	0	0	0	0	0	0	0	0	0	0	0
F5GXW5;Q99622	0	0	-0.29985	0.29985	0	0	0	0	0	0	0
F5GXX5;P61803	0	0	0	0	0	0	0	0	0	0	0
F5GXX6;F5H271;Q9NQ89
F5GY03;P09486	0	0.0101121	0.428479	0	0	0	0	0	0	0	-0.438591
F5GY80;F5H7G1;P07358	0	-1	1	0	0	0	0	0	0	0	0
F5GYJ5;Q9NX18	0	0.350243	0	0	0	-0.275381	0	0	0	-0.0748619	0
F5GYK2;Q9NRL3;Q9NRL3-3
F5GYQ1;P61421	0	-1	0	0	0	1	0	0	0	0	0
F5GYQ6;H7C1B8;H7C499;Q96HL8;Q96HL8-2;Q96HL8-3;Q96HL8-4;S4R3I7	0	0	-0.428106	0	0.626114	-0.571894	0	0	0	0.373886	0
F5GYQ7	1	0	0	-1	0	0	0	0	0	0	0
F5GZ54	0.481135	0	0	0	0	0	0	0	0	-0.481135	0
F5GZ97;Q9Y3C0	0	0	0	0	-0.630431	0.324206	0	0.306225	0	0	0
F5GZG1	-0.304262	0.514874	0	0	0	-0.352215	0	0	0	0	0.141602
F5GZQ1	0	0	0	0	-0.422507	0	0	0.422507	0	0	0
F5GZY7;Q9H0R8;Q9H0R8-2
F5H001;F5H7N8	-0.313906	0	0	0	-0.361657	0	0	-0.324436	1	0	0
F5H039;Q9NQX3;Q9NQX3-2	0	0	0	0.0278728	0	0	0	0	-0.0278728	0	0
F5H0C4;Q9BRP4;Q9BRP4-2	0	0	0	0	0	0	0	0	0	0	0
F5H0F9;Q9UJX4;Q9UJX4-3	0	0	-0.436394	0	0	0	0	0.342973	0.0934213	0	0
F5H0R1;H3BRB1;Q9H6E5	0	0	0	0	0	0	0	0	0	0	0
F5H0U5;Q9NZD2	0	0	0	0	0	0	0	0	0	0	0
F5H101;F8WE42;Q76FK4;Q76FK4-4	0	0	0	0	0	0	0	0	0	0	0
F5H116	0	0	0.375412	0	0	0	-0.337226	0	0	-0.0381855	0
F5H157;Q15286	-1	0.685704	0.314296	0	0	0	0	0	0	0	0
F5H199;F5H7C4;Q8IXL7-2	0	0	0	0	0	0	0	0	0	0	0
F5H1R2;Q8IY45;Q8IY45-2
F5H1R4;K7EM85;K7ES92;K7ES98;Q92619;Q92619-2
F5H1S1;Q92521	0	0	-0.441901	0	-0.558099	1	0	0	0	0	0
F5H1U9;O75970;O75970-3
F5H1Z6;Q9Y365	0	0	0	0	0	0	0	0	0	0	0
F5H265	0	0.528937	0	0	0	-0.479028	0	0	0	0	-0.0499084
F5H269;Q9Y485
F5H2B9;H0YNH8;Q9BZF9;Q9BZF9-2
F5H365;Q15436	0	0	0	0	-0.00756642	0	0	0.00756642	0	0	0
F5H369;O75747	0	0	-0.503341	0	0	0	0	0	0	0.503341	0
F5H3G9;F5H4N6;Q9Y3R0;Q9Y3R0-2;Q9Y3R0-3	0	0	0	0	0.502281	0	0	0.497719	-1	0	0
F5H3Y4;Q8IY37	0	0	0	0	0	0	0	0	0	0	0
F5H442;Q99816	0	0	0	0	0	0	0	0	0	0	0
F5H459;Q92572
F5H4F1;Q99638	0	0	0	0	1	0	0	0	-1	0	0
F5H4R1;F5H538;J3KNB8;Q9Y6R4;Q9Y6R4-2	0	0	0	0	0	0	0	0	0	0	0
F5H4X9	-1	0	0	0	0.595099	0	0	0.404901	0	0	0
F5H523;Q9P2K6	0	0	0	0	0	0	0	0	0	0	0
F5H5A3;Q8IVH8;Q8IVH8-2;Q8IVH8-3	0	0	-0.360773	0	0.360773	0	0	0	0	0	0
F5H5I6;H0Y8R1;H0YAK1;Q12849	0	0	0	0	0	0	0	0	0	0	0
F5H5P2;P12694	0	0	0	0	0	0	0	0	0	0	0
F5H5R8;P18440	0	0	0	0	0	0	0	0	0	0	0
F5H5T5;Q7Z3V4
F5H619;Q86XA9;Q86XA9-2	0	0	0	0	0	0	0	0	0	0	0
F5H658;Q14562	0	0	-0.047327	0	0.118088	-0.221609	0	0	0	0	0.150849
F5H6Q1;J3KR44;Q96FW1	0	0	0	0	0	0	0	0	0	0	0
F5H6U7;G3V1U5;Q9Y3E0	0	-0.565777	0	0	0.565777	0	0	0	0	0	0
F5H6Z0;Q00537;Q00537-2	0	0	0	0	0	0	0	0	0	0	0
F5H702;Q96GC5;Q96GC5-3	0	0	0	0	0	0	0	0	0	0	0
F5H760	0.265771	0	-0.367904	0	0.32315	-0.298297	0	-0.333799	0	0	0.411079
F5H785;P0DI81;P0DI81-3;P0DI82
F5H7I0;Q8NC69	0	0	0	0	0.215701	0	0	0	-0.215701	0	0
F5H7I4;H9ZYI9;Q06547;Q06547-2;Q06547-3;Q06547-4	0	0	-1	0	1	0	0	0	0	0	0
F5H7J9;H0YGW5;O75581	0.72855	0	0	0	0	-0.311392	0	0	0	0	-0.417159
F5H7P7;Q96BP3
F5H7S3	0	0	-0.394435	0	0	0	0.394435	0	0	0	0
F5H7V9;J3QSU6;P24821;P24821-2;P24821-3;P24821-4	0	0	0	0	0	0	0	0	0	0	0
F5H8F7;Q9UBL3;Q9UBL3-3	0	0	0	0	0	0	0	0	0	0	0
F5H8H2;Q03426	0	0	0	0	0	0	0	0	0	0	0
F6M2K2;F6M2K4;Q14686	0	0	0	0	0	0	0	0	0	0	0
F6QDS0;I3L0H8;Q9NUU7	0	0	0	-0.392579	0	0	0	0	0.392579	0	0
F6QTA4;Q5JQZ9;Q9BWU1;Q9BWU1-2	0	0	-0.285046	0	0.285046	0	0	0	0	0	0
F6RY50;Q96FS4	0	0	0	0	0	0	0.04203	0	0	-0.04203	0
F6SDV2;Q9GZM7;Q9GZM7-3	-0.36651	0	0	0	0	0	0	0	0	0.517604	-0.151094
F6SFZ6;Q99571;Q99571-2;Q99571-3	0	0.710994	0	0	0.289006	0	0	0	0	0	-1
F6TB26;Q5SZR4;Q9Y2W6	0	0	0	0	0	0	0.250929	0	0	-0.250929	0
F6UJY1;J9JIE9;Q5T013	0	0	0	0	0	0	0	0	0	0	0
F6VRR5;Q9BY77	0	0	0	0	0	0	0	0	0	0	0
F6VZ39;H0YA61;Q9BX46;Q9H0Z9;Q9H0Z9-2	0.228919	0	-0.214823	0	-0.0140953	0	0	0	0	0	0
F6XA08;Q5VYX0;Q5VYX0-2	0	0	0.369177	0	0	-0.483619	0	0	0	0	0.114442
F6XHT0;Q9Y6D0	0	-0.285895	0	0	0	0	0	0	0	0	0.285895
F6XZD3;Q8N283	0	0	0	0	0	0	0	0	0	0	0
F8VP71;Q6P1Q0;Q6P1Q0-2;Q6P1Q0-4;Q6P1Q0-7	0	0	0	0	0	0	0	0	0	0	0
F8VPD4	0	0	0	0	0	0	0	0.297239	-0.297239	0	0
F8VPN1;F8VQE3;F8VRQ9;F8VUB3;F8VWP8;F8VXS2;F8VZI3;F8W0X2;Q9P1Z2;Q9P1Z2-2;Q9P1Z2-3	0	0	0	0.717498	0.282502	0	0	0	-1	0	0
F8VQD9;F8VVA0;Q9BSB4	0	0	0	0	0	0	0	0	0	0	0
F8VQR7;F8VW96;Q16527	-1	0.539989	0	0	0	0	0.460011	0	0	0	0
F8VRE8;Q96HH6;Q96HH6-2	0	-0.279357	0	0	0	0	0	0	0	0	0.279357
F8VRX1;O95398;O95398-2;O95398-3	0	0	0	0	1	0	0	-1	0	0	0
F8VS61	0	0	0.55892	0	0	0	0	0	0	-0.55892	0
F8VTY2;Q8NFH4	0	0	0	0	0	0	0	0	0	0	0
F8VU90;Q9NYL4;Q9NYL4-2	0	-0.102109	0	0	0	0	0	0	0	0.102109	0
F8VUB4;F8VV52;Q9NZN8
F8VUC5;F8VVA7;F8VXB1;F8VXR1;F8VYZ4;F8W156;P61923;P61923-4;P61923-5	0	0	0	0	0	0.50113	0	-0.50113	0	0	0
F8VUF6;F8VWU0;F8VX58;F8VXZ8;P07585;P07585-4
F8VUJ3;Q8N4A0	0	0	0	0	0	0	0	0	0	0	0
F8VUY8;Q96QD8	-0.44573	0	0.286267	0	-0.162846	0	0	0	0	0	0.322309
F8VV56;F8VWK8;F8W022;P08962;P08962-2;P08962-3	-0.283538	-0.716462	0	0	0	1	0	0	0	0	0
F8VVL1;O43583
F8VW50;Q2TAC6;Q2TAC6-2;Q2TAC6-3	0.013267	0	0	0	-0.43815	0	0	0	0	0	0.424883
F8VWS0;P05388;P05388-2	0	-0.13845	0	0	0	0	0.314746	0	0	-0.176296	0
F8VWT9;J3KPF0;Q9Y4D8;Q9Y4D8-4
F8VWW7;Q8NCJ5
F8VWY2;Q9UBM8;Q9UBM8-2	-1	0	0	0	0	0	0	0	0	0	1
F8VWZ8;Q52LW3	0	0	0	0	1	-0.261005	0	0	-0.738995	0	0
F8VX10;F8VXI8;H0YIQ8;Q9H9L4	0	0	0	0	0	0	0	0	0	0	0
F8VXC8;Q8TAQ2;Q8TAQ2-2;Q8TAQ2-3	0	0	0	0	0	0	0	0	0	0	0
F8VXD5;Q53FV1	0	-0.100367	0	0	0.423299	0	0	0	0	0	-0.322931
F8VXH0;J3KQA0
F8VXY6;G3V1V1;Q8TBF4	0.294343	0	0.365098	0	0	-1	0	0	0	0	0.34056
F8VYE8;P36873;P36873-2	0	0	0	0	0	0	0	0	0	0	0
F8VZA0;Q9H0K6	0	0	0.511726	0	-0.00891443	0	0	0	0	-0.502812	0
F8W038;Q8IXM2;Q8IXM2-3	0	0	0.391924	0	0.296486	0	0	-0.68841	0	0	0
F8W0A2	-0.402153	0	0	0	0	-0.353392	0	0	0.448612	0	0.306934
F8W0A3	0	0	-0.625312	0	0	0	0	0.284071	0	0.341241	0
F8W0Q9;Q8NEY8-2;Q8NEY8-8;Q8NEY8-9	0	0	0	0	0	0	0	0	0	0	0
F8W0U9;Q149M9;Q149M9-3
F8W111;P14384	0	0	0	0	0	-0.429435	0	0	0	0	0.429435
F8W1A4;P54819;P54819-2	0	0	0	0	0	0	-0.336637	0	0	0.336637	0
F8W1B3	0.577014	-0.577014	0	0	0	0	0	0	0	0	0
F8W1C3;Q99542	-0.214845	0	0	0	0.447779	-0.39422	0	0	0	0	0.161286
F8W1R9;P36897;P36897-2;P36897-3	0	-0.285955	0	0	0	0	0	0	0	0	0.285955
F8W6G1;Q9UHY1	0	0	0	0	0	0	0	0	0	0	0
F8W6M3;H0Y6A5;Q9NYG2;Q9NYG2-2	0	0	0	0	0	0	0	0	0	0	0
F8W6W2	-1	0	0	0	0	0	0	0.31537	0.68463	0	0
F8W703;Q9HCK4;Q9HCK4-2;Q9HCK4-3;R4GMM8	0	0	-0.0534068	0	0	-0.265209	0	0	0	0	0.318616
F8W726
F8W727;P62910	0	-0.111796	0	0	0	0	0.239288	0	0	-0.127492	0
F8W775	-0.396032	0	0	-0.603968	1	0	0	0	0	0	0
F8W776;Q8TC24;Q9H9S3;Q9H9S3-2;Q9H9S3-3	0	0	0	0	0	0	0	0	0	-0.37144	0.37144
F8W7A7;J3KSU3;Q5BJE1;Q5BJE1-2;Q5BJE1-3;Q5BJE1-4	0.411747	0	0	0	0	0	0.588253	0	0	-1	0
F8W7C6	0	0	0	0	0	0	0.614971	0	0	-0.614971	0
F8W7L6;P42262;P42262-2;P42262-3;P42262-4
F8W7Q2	0.370055	0	0.629945	0	-1	0	0	0	0	0	0
F8W7Q4;Q96A26	0	0	0	0	0	0	0	0	0	0	0
F8W7S5
F8W7T1;Q92784-3	1	0	0	-0.580017	0	0	0	0	-0.419983	0	0
F8W876;P48740;P48740-2;P48740-3;P48740-4	0.184418	0	0	0	0	-0.488053	0.316641	0	0	0	-0.0130068
F8W8H5;Q969Q5	0	0.103903	0	0	0	0	-0.103903	0	0	0	0
F8W930;Q9Y6M1;Q9Y6M1-1;Q9Y6M1-3;Q9Y6M1-4;Q9Y6M1-5;Q9Y6M1-6
F8W9E7;Q96BJ8;Q96BJ8-2;Q96BJ8-3	0	0	0	0	0	0	0	0.408065	-0.408065	0	0
F8W9J4;Q03001	0	0	0.615697	0	0	0	-0.615697	0	0	0	0
F8W9Q8;G3V426;Q86TW2;Q86TW2-2	0	0	0	0	0	0	0.308889	0	0	-0.308889	0
F8W9U4	0.572244	0	0	0	-0.572244	0	0	0	0	0	0
F8W9X7;Q567U6	0	0	0	0	-0.0646054	0	0	0.0646054	0	0	0
F8WA11;Q7Z460;Q7Z460-2;Q7Z460-3;Q7Z460-4;Q7Z460-5	0	0	0	0	0	0	0	0	0	0	0
F8WAJ0;Q9H8H2;Q9H8H2-2;Q9H8H2-4	0	0	-0.272774	0	0.272774	0	0	0	0	0	0
F8WB95;G3V0G5;Q8IV38	-0.262561	0	0	0.262561	0	0	0	0	0	0	0
F8WBF9;Q5TH30;Q9UGV2;Q9UGV2-2;Q9UGV2-3	-1	0	0	1	0	0	0	0	0	0	0
F8WBJ6;Q9NRX1	0	0	-0.410713	0	0.410713	0	0	0	0	0	0
F8WBQ5;F8WDJ7;Q03938	0	0	0	0	0	0	-0.287524	0	0	0.631972	-0.344448
F8WBW1;F8WC41;Q86X83;Q86X83-2
F8WC62;Q96KD3;Q96KD3-2
F8WCX2;H0Y5I5;Q8N1G0;Q8N1G0-2	-0.482633	0	0	0	1	-0.517367	0	0	0	0	0
F8WDE4;Q9NP87;Q9NP87-2	-0.384304	0	0	0	0.384304	0	0	0	0	0	0
F8WDT6;H7C2C9	-0.143083	0	0	0	-0.149381	0.300794	0	-0.00832966	0	0	0
F8WDV0;Q9UI26;Q9UI26-2	0	0	0	-0.418909	0	0	0	0	0.418909	0	0
F8WDW2	0	0	-0.610781	0	0	0.216841	0	0	0	0	0.393939
F8WEM8	0	0	0	0	-1	0	0	0	1	0	0
F8WJN3;Q16630;Q16630-2;Q16630-3	0	0	0	0	0	0	0	0	0	0	0
G3V0I5;P49821;P49821-2	0	0	0	0	0	0	0	0	0	0	0
G3V145;Q8N3Y7;Q8N3Y7-2	0	0	0	0	0	0	0	0	0	0	0
G3V150;O94766;O94766-2	0	0	0	0	0	0	0	0	0	0	0
G3V169;P29466;P29466-2	0	0	0	0	0	0	0	0	0	0	0
G3V180;G3V1D3;Q9NY33	0	0	0	0	0	0	0	0	0	0	0
G3V1A6;P57764	0	0	0	0	0	0	0	0	0	0	0
G3V1B8;H0YEB6;O60232	0	0	0	0	0.445588	0	0	0	-0.445588	0	0
G3V1C3;Q9BZZ5;Q9BZZ5-2	0	0	0	0	0	0	0	0	0	0	0
G3V1L9;Q07157	0	0	0.137887	0	0	0	-0.591897	0	0	0	0.454011
G3V1P2;Q8N584;Q8N584-2	0	0	0	0	0	0	0	0	0	0	0
G3V1P3;Q969J3	0	-0.687809	0	0	0	1	0	0	0	0	-0.312191
G3V1R5;O43847;O43847-2	0	0	0	0	0	0	0	0	0	0	0
G3V1S3;Q6ZUT9;Q6ZUT9-2	0	0	0	-1	0	0	0	0	1	0	0
G3V1Y8;Q86U10;Q86U10-3	0	0	0	0	0	0	0	0	0	0	0
G3V200;H0YHK3;O75334;O75334-3;O75334-4;O75334-5;O75334-6
G3V203;H0YHA7;J3QQ67;Q07020;Q07020-2	0	-0.152091	0	0	0	0	0.323905	0	0	-0.171814	0
G3V229;G3V412;Q99675	0.240076	-0.539788	0	0	-0.0349467	0	0	0	0	0	0.334659
G3V2A2;G3V3I4;P25963	-1	0	0	1	0	0	0	0	0	0	0
G3V2D5;G3V2P5;Q07352	0	0	0	0	0	0	0	0	0	0	0
G3V2D8;Q68DK2;Q68DK2-2;Q68DK2-5	0	0	0	0.0849282	0	0	0	0	-0.0849282	0	0
G3V2S7	0	0	0	0	0	0	0	0	0	0	0
G3V2U7;P07311	0	0	0	0	0	0	0	0	0	0	0
G3V2W1;Q9UK55
G3V3A4;Q13573	0	0	0	0	0	0	0	0	0	0	0
G3V3A5	-0.0137669	0	0.708325	0	0	-0.336293	0	0	0	0	-0.358265
G3V3L0	0	0	0	0	0	0	0	0	0	0	0
G3V3S1;Q8TBB7;Q96JK2;Q96JK2-2;Q96JK2-3	0	0	0	0	-0.273139	0	0	-0.309003	0.582141	0	0
G3V431;Q6NUP7	0	0	0	0	0	0	0	0	0	0	0
G3V470;G3V5X7;Q99973;Q99973-2
G3V4C1;P07910-2	0	0	0	0	0	0	0	0	0	0	0
G3V4E1;H0YJH4;P23743	0.431033	0	0	0	-0.746929	0	0	0	0	0	0.315896
G3V4K3;Q9H9C1;Q9H9C1-2	0	0	0	0	0	0	0	0	0	0	0
G3V4P8;P60983	0	0	-1	1	0	0	0	0	0	0	0
G3V4T6	0	0	0	0	0	0	0	0	0	0	0
G3V4U0;Q9UBX5
G3V4W4;Q96EK6	0	0	0	0	0	0	0	0	0	0	0
G3V529;Q9GZR7;Q9GZR7-2	0	0	-0.293536	0	0	0	0	0	0	0.293536	0
G3V583;Q8N128;Q8N128-2	0.379471	-0.551537	0	0	-0.111848	0.283914	0	0	0	0	0
G3V5N8;Q9HBF4;Q9HBF4-3	0	0	0	0	0	0	0	0	0	0	0
G3V5P5;Q9UPI3;Q9UPI3-2	-0.24357	0	0.307396	0	0	-0.375344	0	0	0	0	0.311519
G3V5T9;P24941	0	0	0	0	0	0	0	0	0	0	0
[truncated: 5,858 more rows]

## Sheet: E06_B_right
Relocalization from chow to HFHF-fasted
Identifier	RL_LD	RL_ER	RL_NUCLEUS	RL_NUCLEUS	RL_GOLGI	RL_LYSOSOME	RL_PEROXISOME	RL_ENDOSOME	RL_PROTEIN-COMPLEX	RL_MITOCHONDRIA	RL_PM
A0A024QZ33;K7EK40;K7EMD8;K7ERM9;Q9H0G5	1	0	0	0	-0.516246	0	0	0	-0.483754	0	0
A0A024QZW4;Q9H1N7	0	0	0	0	0.208212	0	0	-0.208212	0	0	0
A0A024QZX5;A0A087X1N8;A0A2R8YD12;P35237	-1	0	0	1	0	0	0	0	0	0	0
A0A024R3B9;E9PJL7;E9PNH7;E9PRA8;P02511	0	0	0	0.681421	0	0	0	0	-1	0	0.318579
A0A024R4E5;Q00341	0	0	0	0	0	0	0	0	0	0	0
A0A024R571;Q9H4M9
A0A024R5I4;O94956	0	0.162209	0	0	0	-0.277834	0	0	0	0	0.115625
A0A024R6I7;P01009
A0A024R7W5;A0A087WY31;A0A087X0Q1;Q7Z739	0	0	-1	0	0	0	1	0	0	0	0
A0A024RA52;P25787	0	0	0	0	0	0	0	0	0	0	0
A0A024RAC6;Q14241	0	0	0.389733	-1	0.322029	0	0	0.288238	0	0	0
A0A024RBG1;Q9NZJ9-2	0	0	0	0	0	0	0	0	0	0	0
A0A024RCG2;Q96BI1	0	0	0	0	0	0	0	0	0	0	0
A0A024RCN4;A0A087X2F1;B4DMT1;Q16670;Q16670-2	0	0	-0.677675	0	1	0	0	0	0	0	-0.322325
A0A024RCQ8;A0A0G2JH76;A0A0G2JHB6;A0A0G2JIU6;A0A0G2JK02;A0A0G2JKR3;A0A0G2JLA3;A0A0G2JLL3;A0A140T8X7;A0A140T9Y1;G8JLL2;Q9UMR5;Q9UMR5-2;Q9UMR5-3	0	0.644072	0	0	0	0.355928	-1	0	0	0	0
A0A024RCR6;A0A0G2JK23;P46379;P46379-2;P46379-3	0	0	0	0	0	0	0	0	0	0	0
A0A044PY82	0	0	0	0	0	-0.407769	0.61512	0	0	0	-0.207351
A0A067XG54;Q8NB49;Q8NB49-2;Q8NB49-3;Q8NB49-4
A0A075B6F9;Q9Y314	0	0	0	0	-0.61232	0	0	-0.0766092	0.688929	0	0
A0A075B6G3;A0A087WTU7;A0A087WV90;A0A5H1ZRP8;P11532;P11532-11;P11532-4	0	0	0	0	0	0	-0.0225185	0	0	0	0.0225185
A0A075B6U9	0	0	0.355986	0	0	0	0.265947	0	0	-0.621933	0
A0A075B6W5
A0A075B727;A0A075B728;P16284;P16284-2;P16284-3;P16284-4;P16284-5;P16284-6	0	0	0	0	0.618123	0	0	0.381877	-1	0	0
A0A075B730;P58107	0	0	-0.669742	0	0	0	0	0	0	-0.330258	1
A0A075B749;A0A087WX83;Q5VU43;Q5VU43-3;Q5VU43-4
A0A075B754;Q96QE3;Q96QE3-2	1	0	0	0	0	0	-1	0	0	0	0
A0A075B773;K7ELY8;O00623	0	0	0	0	0	0	0.0894561	0	0	0.156018	-0.245474
A0A075B784;E9PEW0;K7ELR5;Q8IXW9;Q9P275	0	0	-0.243518	0	0	0	0	0	0	0	0.243518
A0A075B7B1;C9JIE4;O15061;O15061-2;O15061-3	0.652431	0	0	0	-0.608961	-0.0434701	0	0	0	0	0
A0A075B7B5;B7ZM87;O75044
A0A075B7F1;S4R3C0	-1	0	0	0	0.6502	0	0.3498	0	0	0	0
A0A087WSV6;A0A087WSX8;A0A0B4J1W1;A0A0G2JLS4;A0A0G2JM99;A0A0G2JMY9;A0A0G2JNK9;A0A0G2JNM2;A0A0G2JNQ6;A0A0G2JNR3;A0A0G2JP64;A0A0G2JP80;A0A0G2JP96;A0A0G2JQ15;A0A0G2JQ44;A0A0G2JQ46;A8MVE2;D9IDM5;D9IDM6;F6RVM3;F6TER3;O75019;O75019-2;Q8N6C8;Q8N6C8-3;Q8NHL6;Q8NHL6-2;Q8NHL6-3;Q8NHL6-4;Q8NHL6-5
A0A087WSW7;A0A0B4J1V9;F6XU50;Q9NRZ9;Q9NRZ9-2;Q9NRZ9-3;Q9NRZ9-4;Q9NRZ9-5;Q9NRZ9-6	-0.533754	0	0	0	0.0778737	0.45588	0	0	0	0	0
A0A087WSW9;A0A087WSY9;Q16881;Q16881-3;Q16881-4	0	0	0	0	0	0	0	0	0	0	0
A0A087WSY1;O15146;O15146-2;O15146-3;Q5T0B5	0	0	-1	0	0.587564	0	0.412436	0	0	0	0
A0A087WSY5;Q96IY4	0	-0.391976	0	0	0	0.391976	0	0	0	0	0
A0A087WT18;Q96A73;Q96A73-2	0.373163	0	0	0	0.261728	-0.260658	0	0	0	-0.0539024	-0.320331
A0A087WT20;Q9NV06	0	0	-0.203955	0	0	0	0	0	0	0.203955	0
A0A087WT23;A0A087WV67;O00124;O00124-3	0.386284	0	0	0	-0.676541	0	0	0	0	0	0.290257
A0A087WT34	-0.297706	0	0.297706	0	0	0	0	0	0	0	0
A0A087WT44	-0.285835	-0.0222451	0	0	0	0.30808	0	0	0	0	0
A0A087WT59;P02766	0	-0.42063	0	0	0	0.42063	0	0	0	0	0
A0A087WT84;Q9H9V9;Q9H9V9-2	0.440312	0	0	0	0	0	0.559688	0	-1	0	0
A0A087WT87;P43003;P43003-2	0.398184	0	0	0	0.310034	-0.469188	0	-0.239029	0	0	0
A0A087WT95;P49753	0	0	0.611452	0	0	0	0	0	0	-0.611452	0
A0A087WTA5;E7ERK9;Q9UI10;Q9UI10-2;Q9UI10-3
A0A087WTA8;P08123	0	0	0	0	0	0	0	0	0	0	0
A0A087WTJ6;O14627;P47902;P47902-2;Q99626	0	0	0	0	-1	0	0	0	0.608638	0.391362	0
A0A087WTK0;A0A087WVC6;Q12913	0	0.339253	0	0	0	-0.188752	0	0	0	0	-0.150501
A0A087WTM1;Q9Y6N7;Q9Y6N7-2;Q9Y6N7-3;Q9Y6N7-4;Q9Y6N7-5;Q9Y6N7-6	0	0	0	0	0	0.484048	-1	0	0	0	0.515952
A0A087WTP3;Q92945	0	0	0	0	0	0	0	0	0	0	0
A0A087WTQ2;A0A3B3IT47;C9JGR9;E7EQ49;Q9Y2I8;Q9Y2I8-2;Q9Y2I8-3
A0A087WTS0;H0YJK8;P18283	0	0	0	0	0	0	0	0	0	0	0
A0A087WTT2;Q5JWB9;Q96A57;Q96A57-2	0	0.465496	0	0	-0.465496	0	0	0	0	0	0
A0A087WTU3;Q9Y6I9
A0A087WTV6;A0A087WZR9;Q96C36	0	0	0	0	0	0	-0.320748	0	0	0.320748	0
A0A087WTY4;P49454	0	0	0	0	0	0	0	0	0	0	0
A0A087WTY7;Q9H227	0	0	0	0	0	0	0	0	0	0	0
A0A087WTZ8;E5RFJ1;E5RHW9;E5RIM1;Q96MF7	0	0	0	0	0	0	0	0	0	0	0
A0A087WU02;Q96RQ1	-0.200265	0.54724	0	0	-0.346975	0	0	0	0	0	0
A0A087WU05;A0A087WY48;Q8IY22;Q8IY22-2;Q8IY22-3	0	0	-1	0	1	0	0	0	0	0	0
A0A087WU07;Q5TGZ0;Q5TGZ0-2	0	0	0	0	0	0	0	0	0	0.341155	-0.341155
A0A087WU25	0	0	0	0	0	0	0	0	0	0	0
A0A087WU31;A0A0A0MTB7;E9PE15;P51790;P51790-2;P51790-4;P51790-5	-0.311655	0	0	0	-0.157929	0	0	0.469584	0	0	0
A0A087WU37;A0A087WWG3;A0A087X140;A0A0A0MRU4;A0A0A6YYH9;C9J3G2;H0Y857;Q5JTY5;Q5JTY5-2;Q5RIA9;Q5RIA9-3;Q5RIB0;Q5RIB3;Q8IUF1;Q9BRT8;Q9BRT8-2;Q9BRT8-3
A0A087WU51	0	0	0	0	-0.022427	0	0	0.200193	-0.177766	0	0
A0A087WU53;Q9H0U3	0	0.292697	0	0	0	0	0	0	0	-0.292697	0
A0A087WUB9;Q8WYA6;Q8WYA6-4	0	0	0	0	0	0	0	0	0	0	0
A0A087WUC6;E9PI68;Q15005	0	-0.289023	0	0	0	0	0	0	0	0.289023	0
A0A087WUD3;Q9NRP0;Q9NRP0-2
A0A087WUE2	0.640951	0	0	0	0.359049	0	0	0	-1	0	0
A0A087WUE4;A0A0G2JNN3;C9JMY0;Q96PV6;Q96PV6-1	0	0	0.341595	0	0	0	0	0	0	0	-0.341595
A0A087WUE6;A4PB68;Q3T8J9;Q3T8J9-2;Q3T8J9-3;Q9H869;Q9H869-2;Q9H869-3;Q9H869-4;Q9H869-5;Q9H869-6;Q9H869-7;Q9H869-8;Q9H869-9	0	0	0	0	-0.377784	-0.622216	0.280957	0	0	0.390524	0.328519
A0A087WUI6;Q8WXW3	0	0.447741	0	0	-0.447741	0	0	0	0	0	0
A0A087WUJ1;Q9H400;Q9H400-2	0	0	0	0	0	0.30975	-0.140961	0	0	0	-0.168789
A0A087WUK2;O14979;O14979-2;O14979-3	0	0	0	0	0	0	0	0	0	0	0
A0A087WUL2	0	0	0	0	0	0	0	0	0	0	0
A0A087WUL4;A0A087WX23;A0A087WZG9;B4DSP0	0	0	0	0	0	0	0	0.339207	-0.339207	0	0
A0A087WUM5;Q5VZR0;Q9H4G4	0	0	0	0	0	-0.0331454	0	0	0	0	0.0331454
A0A087WUQ6;P07203	0	0	0	0	0	0	-1	0	0	1	0
A0A087WUT0;A0A0A0MR39	0	0	0	0	0	0	0	0	0	0	0
A0A087WUT6;O60841	0	0	0	0	0	0	0	0	0	0	0
A0A087WUU8;M0R3J2	0	0	0.333294	0	0	0	0	0	0	-0.765714	0.43242
A0A087WUW9;Q9NXU5	1	0	-1	0	0	0	0	0	0	0	0
A0A087WUZ7;Q9Y5W8;Q9Y5W8-2	0	0	0	0	0	0	0	0	0	0	0
A0A087WV01	0	0	0	0	0	0	0	0	0	0	0
A0A087WV05;Q99417
A0A087WV24;P20711;P20711-3	0	0	0	0	0	0	0	0	0	0	0
A0A087WV25;O95684;O95684-2	-1	0	0	0.752651	0.247349	0	0	0	0	0	0
A0A087WV39;Q92698;V9GYD3	0	0	-0.450821	0	1	-0.294676	0	0	0	0	-0.254503
A0A087WV97;Q8WU79;Q8WU79-2;Q8WU79-3
A0A087WVA1;P62341	0	0	0	0	0	0	0	0	0	0	0
A0A087WVA8;Q8IWB9;Q8IWB9-2
A0A087WVC1;Q9BQ39	0	0	0	0	0	0	0	0	0	0	0
A0A087WVE2;O00602	0	0	0.0234671	0	0.383388	-0.212946	0	0	0	0	-0.193909
A0A087WVF1;K7EQH1;Q96B23;Q96B23-2	0	0	-0.616602	0	0	0	0.315468	0	0	0.263103	0.0380311
A0A087WVF7;Q9NZM3;Q9NZM3-2	0	0	-1	0	0	0.317476	0.377364	0	0	0	0.30516
A0A087WVI0;E9PBL8;Q8WTW3	0	0	0	-0.566114	0	0	0	0	0.566114	0	0
A0A087WVM1;P78382;P78382-2;Q5W1L7	0	0	0	0	-0.254977	0	0	0.254977	0	0	0
A0A087WVM4;B7ZM99	0.0923749	0	0	0	0	0	-0.391516	0	0	0.299141	0
A0A087WVP7;P0C024;P0C024-2	0	0	0	0	0	0	0	0	0	0	0
A0A087WVQ6;Q00610;Q00610-2
A0A087WVS8;Q70IA6;Q70IA6-3	0	0	0	-0.299131	0	0	0	0	0.299131	0	0
A0A087WVT6;A0A087X159;D6RAC5;P81877;P81877-2;P81877-3;P81877-4;P81877-5;Q9BWW4;Q9BWW4-2;Q9BWW4-3	0	0	0.517792	0	-0.0554351	0	0	-0.462357	0	0	0
A0A087WVT8;A0A087X1L3;Q6ZWJ8	0	0	0	0	0	-0.255876	-0.0394032	0	0	0	0.295279
A0A087WVX4;P49895;P49895-2;P49895-4	0.144566	-0.144566	0	0	0	0	0	0	0	0	0
A0A087WVX5;A0A1B0GTA9;A0A1B0GTF6;A0A1B0GTN8;A0A1B0GTP5;A0A1B0GTS4;A0A1B0GTX2;A0A1B0GU53;A0A1B0GUI8;A0A1B0GUK4;A0A1B0GVB2;A0A1B0GWF9;A0A1C7CYX2;A0A2R8Y555;A0A2U3TZM7;A0A494C0B2;A0A494C0Z9;A0A494C184;E7EN11;F8VNV8;F8VU10;F8VUW8;H0Y476;O00305;O00305-2;O00305-3;O00305-4;P54284;P54284-2;P54284-3;P54284-4;P54284-5;Q02641;Q02641-2;Q02641-3;Q08289;Q08289-10;Q08289-2;Q08289-3;Q08289-4;Q08289-5;Q08289-6;Q0…	0	-0.452546	0	0	0	-0.296613	0	0	0	0	0.749159
A0A087WVZ7;A0A087X068;Q9UJW7;Q9UJW7-2	0.495781	0	0	0	-0.608536	-0.391464	0	0	0	0.504219	0
A0A087WVZ9;A0A0A0MQR7;P19388	0	0	-0.489948	0	0.342199	0	0	0.312889	0	0	-0.16514
A0A087WW06;B0QYP5;Q96AY4	-0.375238	0	0	0	1	0	0	0	-0.624762	0	0
A0A087WW23;P20292	0	0	0.0768024	0	0	0	0	0	0	0	-0.0768024
A0A087WW28	0	0	0	0	-0.478853	0	0	0	0.478853	0	0
A0A087WW48;E7ET14;H0Y3N9;H0Y589;O75151;Q9UPP1;Q9UPP1-2;Q9UPP1-3;Q9UPP1-4;Q9UPP1-5	0.541475	0	0	-0.633528	0	0	0	0	0.0920527	0	0
A0A087WW58;Q9C0D9	-0.276954	0.624584	-0.390755	0	0.375416	0	0	0	0	0	-0.332291
A0A087WW59;Q7Z7L8	0	0	0	0	0	0	0	0	0	0	0
A0A087WW66;Q99460;Q99460-2	0	0	0	0	0	0	0	0	0	0	0
A0A087WW76;A0A1B0GTZ9;A0A1B0GV73;A0A452Q6Z5;H0Y468;Q5T5U3	0	0	-0.628492	0	1	0	0	0	0	-0.371508	0
A0A087WW77;Q15334
A0A087WWA3;O60333;O60333-2;O60333-4;Q4R9M9	0	0	0	-0.0317456	0	0	0	0	0.0317456	0	0
A0A087WWA7;O14640;O14640-2;P54792;P54792-2	0	0	0	0	-0.318577	0	0	0.318577	0	0	0
A0A087WWF6;F8W8R3;P49005
A0A087WWG5	0.306806	-0.306806	0	0	0	0	0	0	0	0	0
A0A087WWH3;Q9NZM4;Q9NZM4-2	0	0	0	0	0	0	0	0	0	0	0
A0A087WWI0	0	0	0	0	0	0	0	0	0	0	0
A0A087WWM0;O43617	0	0	0	0.0380132	0	0	0	0	-0.0380132	0	0
A0A087WWM4;H0YNJ6;Q9P2T1;Q9P2T1-2	0	0	0	0	0	0	0	0	0	0	0
A0A087WWM6;E7EQL6;O43272;O43272-1;O43272-2	0	0	0	0	0	0	0	0	0	0	0
A0A087WWP4;A0A494C001;A0A499FJY3;Q96T37;Q96T37-2;Q96T37-3;Q96T37-4	0	0	0	0	0	0	0	0	0	0	0
A0A087WWP5;Q12962	0	0	-0.37227	0	0.37227	0	0	0	0	0	0
A0A087WWP8;A0A0C4DGT8;A0A0C4DH79;Q5VWQ0;Q5VWQ0-4	0	0	0	0	0	0	0	0	0	0.198952	-0.198952
A0A087WWQ2;Q92979;V9GYP5	0	0	0	0	0	0	0	0	0	0	0
A0A087WWR2;H3BQI4;H3BQS2;I3L2Z5;P56270;P56270-2;P56270-3;P56270-4	0	0	1	0	-0.663902	0	0	-0.336098	0	0	0
A0A087WWS1;Q96FV9	0	0	0.458441	0	0	0	0	0	0	0	-0.458441
A0A087WWT7;A0A1W2PRP3;Q7Z7M1	0	0	0	0	-0.0980014	-0.250969	0	-0.0752562	0.424226	0	0
A0A087WWU8	0	0	0	0	-0.441183	0	1	0	-0.558817	0	0
A0A087WWW9;O95999	0	0	0	0	0	0	0	0	0	0	0
A0A087WWY0;P08519	-0.685584	0.685584	0	0	0	0	0	0	0	0	0
A0A087WX02;F8WB74;M0QYX1;P63302	-0.331918	0	0	0	0.331918	0	0	0	0	0	0
A0A087WX10;G3V4M2;G3V5E8;P54803	0	0.435153	0	0	0	0.259847	0	0	0	-1	0.305
A0A087WX11;J3KNG8;Q8TF40;Q8TF40-3	0.403053	0	0	0	-0.412029	0	0	0	0.00897612	0	0
A0A087WX19;A0A087WX45;C9J5R6	0	0	0	0	0	0	0	0	0	0	0
A0A087WX80;A0A087WYF1;P24043	0	0	-0.57595	0	0	0	0.290503	0	0	0	0.285446
A0A087WX97;Q9BXK5	0	0	0	0	0	0	-0.491216	0	0	0.491216	0
A0A087WX99;A0A0G2JRA4;P55283;P55283-2	0.472379	0	0	0	0.527621	-0.550449	0	0	0	0	-0.449551
A0A087WXB0;O15126
A0A087WXC5;E7ESZ7;O95299	0	0	0	0	0	0	0	0	0	0	0
A0A087WXD1;Q96T83	0	0.46421	0	0	-0.283398	0.274574	0	-0.455385	0	0	0
A0A087WXI2;Q9Y6R7	0	0	1	0	0	-0.245946	-0.412174	0	0	-0.341879	0
A0A087WXI5;P12830;P12830-2	0	0	0	0	0	0	0.53697	0	0	0	-0.53697
A0A087WXL6;B7Z879;Q9H270
A0A087WXM6;A0A0A6YYL6;J3KRX5;J3QQT2;P18621;P18621-3	0	-0.0780845	0	0	0	0	0	0	0	0.0780845	0
A0A087WXN9;Q765P7	0	0	0	0	0	0	0	0	0	0	0
A0A087WXS6;C9JBF1	-0.417811	0	0	0	0	0	0	0	0.417811	0	0
A0A087WXU0;A0A2R8Y4J4;Q9NWS8;Q9NWS8-2	0	0	0	0	0	0	0	0	0	0	0
A0A087WXV4;P41235;P41235-2;P41235-4;P41235-5;P41235-6	0	0	-0.252126	0	0	0	0	0	0	0	0.252126
A0A087WXW3;Q9Y3P8	-0.726197	0	0.586118	0	0	0	0	0	0	0.413882	-0.273803
A0A087WXW6;A0A140TA70;A0A140TA74;A9JR48;Q9BXA9;Q9BXA9-2;Q9BXA9-3;Q9BXA9-4	1	0	-0.512234	0	0	0	0	0	-0.487766	0	0
A0A087WY00;F8W6H6;F8WE88;G3V394;Q9Y4I1;Q9Y4I1-2;Q9Y4I1-3	0	0	-0.274955	0	0.528146	-0.271474	0	0	0	-0.209861	0.228144
A0A087WY55;Q9NP79	0	0	0	0	0	0	0	0	0	0	0
A0A087WY67;P0CG29;P0CG30;Q6ICJ4	0	0	0	0	0	0	0	0	0	0	0
A0A087WY71;Q96CW1;Q96CW1-2	0	0	0	0	0	0	-0.0710331	0	0	0	0.0710331
A0A087WY85;A0A0A0MQU3;D6RAH7;D6RFM0;H9KV45;P61077;P61077-2;P61077-3;P62837;P62837-2	0	0	0	0.606822	0	0	0	-0.43743	-0.169392	0	0
A0A087WYD6;A0A0G2JLV0;Q03519;X5CMH5	-0.336787	0.336787	0	0	0	0	0	0	0	0	0
A0A087WYF7;Q6UXV4	0	0	0.271877	0	0	0	0	0	0	-0.271877	0
A0A087WYJ2;M0QZR8;M0R2B7;P28340
A0A087WYL3;Q17R60	0	0	0	0	1	-0.279976	0	0	0	-0.720024	0
A0A087WYL6;A0A087WZG6;A0A087X1S9;Q8TEW8;Q8TEW8-2;Q8TEW8-3;Q8TEW8-5;Q8TEW8-6;R4GN62
A0A087WYM3;A0A0A0MRF5;E7EWX6;Q8IXJ6;Q8IXJ6-2;Q8IXJ6-3;Q8IXJ6-4
A0A087WYN9;Q7Z478	-1	0.406975	0	0	0	0	0.303628	0	0	0.289397	0
A0A087WYP2;Q8IZQ5	0	0	1	-1	0	0	0	0	0	0	0
A0A087WYR0;P09132	0	0	0	0	0	0	0	0	0	0	0
A0A087WYS3;Q9ULU4;Q9ULU4-10;Q9ULU4-11;Q9ULU4-12;Q9ULU4-13;Q9ULU4-19;Q9ULU4-22;Q9ULU4-7;Q9ULU4-8;Q9ULU4-9	0	0	0	0	0	0	0	0	0	0	0
A0A087WYT3;Q15185;Q15185-4	0	0	0	0.601369	0	0	0	0	-0.601369	0	0
A0A087WYV9;A0A087X1F5;P57105	0	0	0	0	0	0	0	0	0	0	0
A0A087WYX8;A0A1W2PQW0;A0A590UJL7;A0A5F9ZH12;A0A5F9ZHT2;A0A6Q8PH73;Q14CM0	-0.193306	0	0.436738	0	-0.241785	-0.29166	0	0	0	0.563262	-0.273249
A0A087WYY0;A0A087X260;B1AKP7;G3V162;Q13148	0	0	0	0	0	0	0	0	0	0	0
A0A087WZ13;E9PAU2;Q8IY67;Q8IY67-2	0	0	0	0	0	0	0	0	0	0	0
A0A087WZ32;A8K727;Q9HB19	0	0	0	0	0	0	0	0	0	0	0
A0A087WZ40;Q14244;Q14244-6;Q14244-7	0	0	0	0	0	0	0	0	0	0	0
A0A087WZ62;Q9H6U8;Q9H6U8-3	-0.222049	0.581223	0	0	-0.359175	0	0	0	0	0	0
A0A087WZ97;A0A087WZK6;A0A087X2C2;Q5T7M9	0	0	0	0	0.0695771	0	0	-0.0695771	0	0	0
A0A087WZB5
A0A087WZC2;A0A0C4DGS8;E0YMJ8;P35680;P35680-2;P35680-3;P35680-4	0	0	0.591538	0	0	-0.320142	0	0	0	0	-0.271396
A0A087WZE9	-0.2249	0	0.2249	0	0	0	0	0	0	0	0
A0A087WZG4;A0A3B3IPE9;A0A590UK10;Q6ZSZ5;Q6ZSZ5-1;Q6ZSZ5-2;Q6ZSZ5-5;Q6ZSZ5-6	-0.24414	0	0	0.24414	0	0	0	0	0	0	0
A0A087WZK9;B3KS98;O15372	0	0	0	0	0	0	0	0.0284035	-0.0284035	0	0
A0A087WZM2;D6REQ6;D6RHI9;O00584	0	0.664124	0	0	0	-1	0	0	0	0.335876	0
A0A087WZM8;Q8TBM7;Q8TBM7-2;Q8TBM7-3	0	0.127768	0	0	-0.502767	0	0	0	0	0	0.374999
A0A087WZN1;O43837	0	0	0	0	0	0	0	0	0	0	0
A0A087WZP9	0	-0.63438	0.195233	0	0	0.241927	0	0	0	0	0.197221
A0A087WZQ7;Q9H115	0	0	0	0	-0.263744	0	0	0.263744	0	0	0
A0A087WZT0;M0QY61;M0QZ22;M0R0X3;Q5PRF9	0	0	0	0	-0.146016	0	0	0.146016	0	0	0
A0A087WZT2;Q6UX53	0.145842	-0.145842	0	0	0	0	0	0	0	0	0
A0A087WZT3;Q9H3K6	0	0	0	1	0	0	0	0	-0.588374	0	-0.411626
A0A087WZU2;E5RGN0;Q00536;Q00536-2;Q00536-3	0	0	0	0	0	0	0	0	0	0	0
A0A087WZU5;O43657
A0A087WZV0;O43314
A0A087WZY5;A8MXH5;F5H3Q5;F5H851;Q14031;Q14031-2	0	-0.470851	0	0	0	0	0.266363	0	0	0	0.204488
A0A087X011;E9PES4;J3KPF9;Q9Y496
A0A087X020;Q9Y3A5
A0A087X080;A0A0U1RRH1;A0A0X1KG73;Q15413;Q15413-2;Q15413-3	-0.51516	0	0	0	-0.48484	0	0	0	1	0	0
A0A087X091	0	0	0	0.550951	-0.626971	0	0	-0.373029	0.449049	0	0
A0A087X0D5;P09668	0	0.55238	0	0	0	0.0249158	-0.577296	0	0	0	0
A0A087X0F1;Q9UK61;Q9UK61-2;Q9UK61-3;Q9UK61-4	0	0	-0.301338	0	0	0	0	0	0	0.301338	0
A0A087X0H8;Q15714;Q15714-2;Q15714-3	0.242352	0	-0.350052	0.757648	0	0	0	0	-0.649948	0	0
A0A087X0H9;Q5T8P6	0	0	0	0	0	0	0	0	0	0	0
A0A087X0K0;P39059	0.372781	0	-0.720477	0	0	0	0	0	0	0	0.347696
A0A087X0K4;Q7Z408;Q7Z408-2;Q7Z408-4	0	0	-0.414731	0	0	0	0	0	0	0.414731	0
A0A087X0K9	0	0	-0.0299901	0	0	-0.294117	0	0	0	0	0.324107
A0A087X0L7;E7EVY0;J3KNA0;Q15070;Q15070-2	0	0	0	0	0	0	0	0	0	0	0
A0A087X0M4;Q9BWU0	0	0	-0.347143	0.647848	0	0	0	0	-0.300705	0	0
A0A087X0P0	0	0	-0.341531	0	1	0	0	0	0	-0.658469	0
A0A087X0Q9;Q9BVL4
A0A087X0R6;Q9UMY4;Q9UMY4-1	0	0	0	0	0	0	0	0	0	0	0
A0A087X0R7;Q9H4L4	0	0	0	0	0	0	0	0	0	0	0
A0A087X0R9;B8ZZK1;Q07837;Q07837-2;Q07837-5;Q07837-6;Q07837-7	-0.298479	0.447508	0	0	0	-0.378057	0	0	0	0	0.229028
A0A087X0S5;P12109	0	0	0	0	0	0	0	0	0	0	0
A0A087X0T5;Q96AB6	0	0	0	0	0	0	0	0.325675	-0.325675	0	0
A0A087X0V5;P29728;P29728-2
A0A087X0W8;Q04206;Q04206-2;Q04206-3;Q04206-4;Q2TAM5	0	0	0	0	0	0	0	0	0	0	0
A0A087X0W9;Q8N6M0	0	0	0	0.488453	0	0	0	-0.266801	-0.221651	0	0
A0A087X0X3;P52272;P52272-2	0	0	0	0	0	0	0	0	0	0	0
A0A087X0Y2;A0A087X248;A0A087X2I9;A0A096LPD8;F5GWV3;F5H3N7;F5H8B4;O14607;O14607-2;O14607-3;O14607-4;O14607-5	0	0	-0.646277	0	0.646277	0	0	0	0	0	0
A0A087X108	0	0	0	0.351271	0	0	0	0	-0.351271	0	0
A0A087X117;A0A0G2JN29;Q15155	0	-0.674691	0	0	0	0	0	0	0	0.431726	0.242964
A0A087X138;Q8TF71	0.250266	0	0	0	0	-0.370762	0	0	0	0	0.120495
A0A087X1A8;A0A2R8Y3X7;D3VVH9;F5H211;G3V3R7;P54252;P54252-1;P54252-4	0	0	0	0	0	0	0	0	0	0	0
A0A087X1B2	0	0	0	0	0	0	0	0	0	0	0
A0A087X1B6;E9PEG3;F5GZG9;P10275;P10275-3;P10275-4	0	0	0	-1	0.39189	0	0	0	0.60811	0	0
A0A087X1E4;P53365;P53365-3	0	0	0	-0.501491	0.302595	0	0	0.271544	-0.0726485	0	0
A0A087X1G1;H7BYD0;Q16718;Q16718-2	0	0	0	0	0	0	0	0	0	0	0
A0A087X1G4	0.292556	0	0	0	0.363583	-1	0	0	0	0	0.343862
A0A087X1J2	0	0	0	0	0	0	0	0	0	0	0
A0A087X1J7;P22352	0	0	0.147154	0	0	0	0.469141	0	0	-0.616295	0
A0A087X1K1;Q96C00	-0.514562	0	0	0	0.172448	0	0	0.342114	0	0	0
A0A087X1N3;F8WC38;O75818;O75818-2
A0A087X1N7;P20929;P20929-2;P20929-3;P20929-4	0	0	0	0	-0.301173	0	0	0.301173	0	0	0
A0A087X1P3;C9IYE1;F8W8P5;H7BYR4;Q86UW7;Q86UW7-2;Q86UW7-3	0.426759	0	0	0	-0.426759	0	0	0	0	0	0
A0A087X1P5;J3KQ41;J3QT95;Q9H9Q2;Q9H9Q2-3	0	0	-1	0.678501	0	0	0	0	0.321499	0	0
A0A087X1R3;A0A0C4DGX0;A6QL64;Q8N2N9	0	0	0	-0.38789	0	0	0	0	0.38789	0	0
A0A087X1S3	0	0	0	0	-0.0474839	0	0	-0.397674	0	0	0.445158
A0A087X1W8;A0A0A0MTJ8;Q9BY67;Q9BY67-3;Q9BY67-4;Q9BY67-5;X5DQS5	0.279461	0	0	0	0	0	0.433532	0	0	0	-0.712994
A0A087X1Z1;A0A0G2JPW5;A0A0G2JQX1;A0A0G2JSA7;Q96RT8;Q96RT8-2	-1	0	0	0	0	0	0.372129	0	0.627871	0	0
A0A087X1Z3;Q9UL46	0	0	0	-0.0757167	0	0	0	0	0.0757167	0	0
A0A087X241;Q2NKQ1;Q2NKQ1-3;Q2NKQ1-4
A0A087X256;Q2M389
A0A087X266;Q9BXJ8	0	1	0	0	0	0	0	-1	0	0	0
A0A087X279;P09913	0	0	0	0	0	0	0	0	0	0	0
A0A087X294;O75914;O75914-2;O75914-3;O75914-4	0	0	0	0	0	0	0	0	0	0	0
A0A087X295;E9PDU5;Q9NNW5	0	0	0	-1	0	0	0	0	1	0	0
A0A087X296;P23219;P23219-2;P23219-3;P23219-4;P23219-5;P23219-6	0	0	0	0	0	0	0.388077	0	0	-0.310736	-0.077341
A0A087X2A7;H0YBA5;H7BY63;Q8NB25;Q8NB25-2;Q8NB25-3;Q8NB25-4	0	0	0	0	-0.149915	-0.354291	0	0.504206	0	0	0
A0A087X2B5;P35613;P35613-2	0	0	0	0	0	-0.0401889	0	0	0	0	0.0401889
A0A087X2D5;Q9BRJ2	0	0	0.0293865	0	0	0	0	0	0	-0.0293865	0
A0A087X2D8;O60271-2;O60271-4	0	0	0	-0.349257	0.349257	0	0	0	0	0	0
A0A087X2G6;A0A0C4DGU5;D6RIC3;Q9Y3C1;Q9Y3C1-2;Q9Y3C1-3	0	0	-0.542858	0	0	0.274809	0	0	0	0	0.268049
A0A087X2I1;P62333	0	0	0	0	0	0	0	0	0	0	0
A0A088AWN3;A0A0A0MSY4;Q9BZ29;Q9BZ29-3;Q9BZ29-4;Q9BZ29-5	0	0	0	0	0	0	-0.413003	0	0	0.413003	0
A0A088AWN8;E7EP87;E9PH27;J3KS48;J3KT43;J3QRB0;Q9UHQ1;Q9UHQ1-2;Q9UHQ1-3;Q9UHQ1-4	-0.361558	0	0	-0.638442	0	0	0	0	1	0	0
A0A090HNM7;A0A1W2PS85;P28715;R4GMW8	0	0	0.504034	0	0	0	0	-0.504034	0	0	0
A0A096LNH6;Q14185	0	0	0	0	0	0	0	0	0	0	0
A0A096LNV3;A0A096LP02;Q9Y508;Q9Y508-2	-0.256509	0	0	0	-0.203214	0	0	0.459723	0	0	0
A0A096LP22;A0A096LP34;C9J7Z1;Q86Y79	0	0	-0.676462	0	0	0	0	0	0	0.676462	0
A0A096LP69	0	0	0	0	0.365755	-0.45166	0	0.305579	0	0	-0.219674
A0A096LPC5;A0A0A0MR88;Q9Y4E1;Q9Y4E1-1;Q9Y4E1-2;Q9Y4E1-6	0	0	0	0	-0.369867	0	0	0.369867	0	0	0
A0A096LPE2	0.613094	-0.613094	0	0	0	0	0	0	0	0	0
A0A096LPI6	0	0	0	0	0	0	0	0	0	0	0
A0A096LPJ4;P05161	0	0	0	0	0	0	0	0	0	0	0
A0A096LPJ9;A0A140G945;A0A140G945-2;E7EWH7;P02489	0	0	0	0	0.388723	0	0	0	-0.388723	0	0
A0A0A0MQR2;Q9BY42	0	0	0	0	0	0	0	0	0	0	0
A0A0A0MQR4;I3L2J0;Q96RK0	0	0	0	0	0	0	0	0	0	0	0
A0A0A0MQS1;Q53H96;Q53H96-2	-1	0	0	0	0	0	0	0	1	0	0
A0A0A0MQS9;A0A0A0MTC7;Q16363;Q16363-2	0	0	0.248791	0	0	0	0	0	0	-0.55758	0.308789
A0A0A0MQT0;P09455	0	0	0	0	0	0	0	0	0	0	0
A0A0A0MQU0;Q9BV38;U3KQC1	0	0	0	0	0	0	0	0	0	0	0
A0A0A0MQU4;Q96I15	0	0	0	0	0	0	0	0	0	0	0
A0A0A0MQU7;A0A0A0MTK8;F5H0K0;P20823;P20823-2;P20823-3;P20823-7;U3KQS6	0	0	0	0	0	0	0	0	0	0	0
A0A0A0MQV6;P09038;P09038-1;P09038-2;P09038-3	0.313344	0	-0.627508	0	0	0	0	0	0	0	0.314163
A0A0A0MQX1;D6RGD1;Q9HD67	0	0	-0.330328	0	0.38014	-0.359594	0	0.322351	0	0	-0.0125698
A0A0A0MQX8;C9JP00;Q9NR56;Q9NR56-2;Q9NR56-5;Q9NR56-6;Q9NR56-7	0	0	0	0	0	0	0	0	0	0	0
A0A0A0MQY7;A0A3B3ISH2;Q5VU97
A0A0A0MR02;P45880;P45880-1;P45880-2	0	0	0	0	0	0	0	0	0	0	0
A0A0A0MR03;A0A0J9YWB6;A0A0J9YWJ4;K7EJD2;Q9Y5B0;Q9Y5B0-4	0	0	0	-0.243494	0.243494	0	0	0	0	0	0
A0A0A0MR05;H3BM50;H3BN58;H3BPT1;H3BPU5;Q9BVC4;Q9BVC4-4;Q9BVC4-5	0	0	0	0	1	-1	0	0	0	0	0
A0A0A0MR07;F5H5P4;P15498;P15498-2;Q96D37	0	0	0	-0.550946	0	0	0	0	0.138813	0	0.412133
A0A0A0MR09;P43378	0.726581	0	-0.282623	0	0	0	-0.443958	0	0	0	0
A0A0A0MR11;A0A0A0MRS1;Q06730;Q06730-2;Q06730-3	0.422344	0	0	0	0.577656	-0.558499	0	0	0	0	-0.441501
A0A0A0MR25;A0A5S6RJB7;D2CGD1;E7EVR7;H7BXU9;H7C265;P21802;P21802-15;P21802-16;P21802-17;P21802-18;P21802-2;P21802-20;P21802-21;P21802-22;P21802-23;P21802-3;P21802-4;P21802-5;P21802-6;P21802-8;S4R381	0.530041	0	0	0	-0.602449	0	0	-0.397551	0.469959	0	0
A0A0A0MR36;Q9ULV0-2
A0A0A0MR51;H7C2V0;O60427	0	0.349222	0	0	0	0	0	0	0	-0.349222	0
A0A0A0MR67;A0A0A0MSA1;E9PDI6;F5GY28;F5H522;Q13936;Q13936-10;Q13936-11;Q13936-12;Q13936-13;Q13936-14;Q13936-15;Q13936-16;Q13936-17;Q13936-18;Q13936-19;Q13936-2;Q13936-20;Q13936-21;Q13936-22;Q13936-23;Q13936-24;Q13936-25;Q13936-26;Q13936-27;Q13936-28;Q13936-29;Q13936-3;Q13936-30;Q13936-31;Q13936-32;Q13936-33;Q13936-34;Q13936-35;Q13936-36;Q13936-37;Q13936-4;Q13936-5;Q13936-6;Q13936-7;Q13936-8;Q13936…	-1	0	0	0	0	0	0	0	1	0	0
A0A0A0MR74;O75907	0	-0.132679	0	0	0	-0.350503	0	0	0	0.483183	0
A0A0A0MRA5;B7Z4B8;M0R3F1;Q9BUJ2;Q9BUJ2-2;Q9BUJ2-4	0	0	0	0	0	0	0	0	0	0	0
A0A0A0MRA8;A8K968;Q9Y2J2;Q9Y2J2-2	0	0	0	0	0	0	-0.137053	0	0	0	0.137053
A0A0A0MRB5;Q8WXG6;Q8WXG6-2;Q8WXG6-3;Q8WXG6-4;Q8WXG6-5;Q8WXG6-6;Q8WXG6-7;Q8WXG6-8	0	0	0	-0.580328	0.269781	0	0	0.259251	0.0512952	0	0
A0A0A0MRD0;A0A2R8YCE3;F5H4B4;F5H4B4-2	-1	0	1	0	0	0	0	0	0	0	0
A0A0A0MRE5;Q9ULH1;Q9ULH1-2
A0A0A0MRF6;Q99996;Q99996-1;Q99996-3;Q99996-5;Q99996-6
A0A0A0MRF9;P16885	0	0	0	0	0	0	0	0	0	0	0
A0A0A0MRG8;Q16611	0	0	0	0	0	0	-0.230934	0	0	0.230934	0
A0A0A0MRH3;Q9Y2W7;Q9Y2W7-2;Q9Y2W7-3	0	0	0.532939	0	0	0	-0.532939	0	0	0	0
A0A0A0MRI1;Q8IXQ4	0	0	0	1	0	0	-0.366972	0	0	-0.633028	0
A0A0A0MRI2;Q9UNH7	0	0	0	0.0241175	0	0	0	0	-0.0241175	0	0
A0A0A0MRJ0;Q5VT25;Q5VT25-2;Q5VT25-3;Q5VT25-4;Q5VT25-5;Q5VT25-6	-0.229789	0	-0.28202	0	0	-0.220982	0	0	0	0	0.732791
A0A0A0MRJ6	0	0	0	0	0	0	0	0	0	0	0
A0A0A0MRJ7;P12259	-0.318821	0.318821	0	0	0	0	0	0	0	0	0
A0A0A0MRM2;Q86VF7;Q86VF7-2;Q86VF7-3;Q86VF7-4	0	0	0	0	-0.129058	0	0	-0.480908	0.609966	0	0
A0A0A0MRM9;Q14978;Q14978-2;Q14978-3	0	0	0	0	0	0	0	0	0	0	0
A0A0A0MRP6;B7ZLQ5;P28370;P28370-2	0	0	0.0562184	0	0	0	0	0	0	0	-0.0562184
A0A0A0MRR7;P09234	0	0	0	0	0	0	0	0	0	0	0
A0A0A0MRT2;Q9BTA9;Q9BTA9-2;Q9BTA9-5	0	0	0	0	0	-0.417	1	-0.583	0	0	0
A0A0A0MRT6;Q8IZP0;Q8IZP0-2;Q8IZP0-3;Q8IZP0-4;Q8IZP0-5;Q8IZP0-6;Q8IZP0-9
A0A0A0MRW6;Q9H6R4;Q9H6R4-2;Q9H6R4-4	0	0	0.274355	0	0	0	0	0	0	0	-0.274355
A0A0A0MRX1;A0A0R4J2E6;A0A494C0F8;A0A494C147;A0A494C1D9;B1APY9;P26378;P26378-1;P26378-2;P26378-3;P26378-4;P26378-5;Q12926;Q12926-2
A0A0A0MRX8;A0A1B0GWI9;A0A1B0GWJ4;A0A2R8Y7V8;O00712;O00712-4;O00712-5;Q5VW26;Q5VW27;Q5VW30;U3KQE8	0	0	0	0	0	0	0	0	0	0	0
A0A0A0MRY0;B0QYI1;Q8WUA7;Q8WUA7-2;Q8WUA7-3;Q8WUA7-4	0	0	0	0	0	0	0	0	0	0	0
A0A0A0MRZ1;Q9H9P5-1;Q9H9P5-3	0	0	0	0	0	0	0	-1	1	0	0
A0A0A0MRZ4;E7EMV7;Q15025;Q15025-2;Q15025-3;Q15025-4;Q15025-5;Q15025-6;Q15025-7;Q15025-8
A0A0A0MS59;A0A0C4DFX4;Q6ZRS2;Q6ZRS2-2;Q6ZRS2-3	0	0	0	0	0	0	0	0	0	0	0
A0A0A0MS79;O14513	0	0	1	0	0	0	0	-0.415585	-0.584415	0	0
A0A0A0MS87	0	0	0	0	0	0	0	0	0	0	0
A0A0A0MS99;I3L4X2;P33527;P33527-2;P33527-3;P33527-5;P33527-9	0	0.531137	-0.54881	0	0	-0.223038	0	0	0	0	0.240711
A0A0A0MSA9;A0A0C4DG49;P15151;P15151-2;P15151-3;P15151-4	-0.2657	0	0	0	-0.248839	0.224392	0	0	0	0	0.290146
A0A0A0MSB4;Q6ZN50;Q969R2;Q969R2-2;Q969R2-3;Q969R2-6	0	0	-0.426963	0	-0.573037	0	0	0	0	0	1
A0A0A0MSB8;Q9UPT5;Q9UPT5-1;Q9UPT5-2;Q9UPT5-5;Q9UPT5-6
A0A0A0MSE3;D3DNG8;P30556	0	0.48033	0	0	0	-0.506961	0	0	0	0	0.0266312
A0A0A0MSG0;A6NGB9	-1	0	0	0.721067	0.278933	0	0	0	0	0	0
A0A0A0MSH9;A0A494C1F7;A0A494C1P7;Q86WJ1;Q86WJ1-2;Q86WJ1-4	-0.354727	0	-0.170041	0	0	0	0	0.524768	0	0	0
A0A0A0MSI2;B3KPJ4;Q8IXK0;Q8IXK0-2;Q8IXK0-3;Q8IXK0-4;Q8IXK0-5	0	0	0	-0.378686	0	0	0	0	0.378686	0	0
A0A0A0MSI6;B7Z1P2;Q9H4M3;Q9H4M3-2	-0.459304	0	-0.200752	0	0.736728	0	0	0.263272	-0.339945	0	0
A0A0A0MSI8;O00471
A0A0A0MSJ9;Q15283;Q15283-2	-0.517785	0	0	0	0.472915	-0.482215	0	0	0	0	0.527085
A0A0A0MSK3;A0A0C4DH47;A0A498U6I9;C9JS68;P24557;P24557-2;P24557-3;P24557-4;Q53F23	0	0	-1	0	0	0	0	0	0	0	1
A0A0A0MSK6;Q13017;Q13017-2
A0A0A0MSL1;Q8TDM6;Q8TDM6-2;Q8TDM6-3;Q8TDM6-4	0	0.695343	-0.344938	0	0	0	0	0	0	-0.269627	-0.0807775
A0A0A0MSM0	0	0	0.250286	0	-0.630338	0	0	0.380052	0	0	0
A0A0A0MSP4;Q86WC4	-0.598762	0	0	0	0	0.190385	0	0	0	0	0.408377
A0A0A0MSQ0;P13797;P13797-2
A0A0A0MSS0;P60880	0	-0.507601	0	0	0	-0.231387	0	0	0	0	0.738988
A0A0A0MSS8;P42330	0	0	0	0	0	0	0	0	0	0	0
A0A0A0MST8;C9JRP1;E9PFN4;Q9Y6M7;Q9Y6M7-12;Q9Y6M7-13;Q9Y6M7-2;Q9Y6M7-6;Q9Y6M7-7;Q9Y6M7-8;Q9Y6M7-9	0	0	0	0	1	-0.48737	0	0	0	0	-0.51263
A0A0A0MSU4;O94911-3	-0.582652	0	0	0	0	0.501113	0	0	0	0	0.0815385
A0A0A0MSV9;A0A0G2JH37;A0A0G2JKZ1;A2AB90;O15533;O15533-2;O15533-3	0	0	0	0	0	0	0	0	0	0	0
A0A0A0MSX9;P41252	0	0	0	0	0	0	0	0	0	0	0
A0A0A0MSY7;O00142;O00142-4;O00142-6	0	0	0	0	0	0	0	0	0	0	0
A0A0A0MSZ9;Q05048	0	0	0	0	0	0	0	0	0	0	0
A0A0A0MT02;A2ABK4;P18615;P18615-3	0	0	1	0	0	0	0	-1	0	0	0
A0A0A0MT16;Q86UQ4;Q86UQ4-3;Q86UQ4-4	0	0	0.213149	0	0	-0.573265	0	0	0	0.394098	-0.033982
A0A0A0MT32;P38571;P38571-2
A0A0A0MT35;A0A2P0CTB1;Q8TBF2;Q8TBF2-3
A0A0A0MT61;G5E979;H7BYM2;Q8WYN0;Q8WYN0-3;Q8WYN0-5	0	0	0	0	0	0	0	0	0	0	0
A0A0A0MT72;C9JUH3;Q9BSQ5;Q9BSQ5-2;Q9BSQ5-3	0.166389	0	0	0	0.223718	0	0	-0.0634735	-0.326633	0	0
A0A0A0MT83;P26440	0	0	0	0	0	0	0	0	0	0	0
A0A0A0MT93	0	0	0.776812	0	-0.575199	0	0	0	0	0	-0.201613
A0A0A0MTC2;D6RA37;D6RDV0;D6RIY7;Q13454;Q13454-2	0	-0.158228	0	0	0	0	0	0	0	-0.0474298	0.205658
A0A0A0MTG5;P13232;P13232-2;Q5FBX5	-0.460761	0	0.235239	0	-0.539239	0	0.285935	0	0	0	0.478825
A0A0A0MTH3
A0A0A0MTH9;O14981	0	0	0.511368	0	0	0	0	0	-0.511368	0	0
A0A0A0MTJ9;Q6PIU2;Q6PIU2-2	0	0.295514	0	0	0	0	0	0	0	-0.295514	0
A0A0A0MTK0;A0A0A0MTP0;F5GWB1;Q7Z6B0;Q7Z6B0-2	0	0	0	0.371492	0	0	0	0	-0.371492	0	0
A0A0A0MTL6;Q6ZS17;Q6ZS17-2;Q6ZS17-3;Q6ZS17-4	-0.244136	0	0	-0.755864	0	0	0	1	0	0	0
A0A0A0MTL7;A0A0D9SGH8;C6ZRJ6;C6ZRJ7;C6ZRK5;E2GH26;Q5JRY3;Q5JRY4;Q5JRY5;Q5VVR7;Q9NQB0;Q9NQB0-10;Q9NQB0-11;Q9NQB0-12;Q9NQB0-13;Q9NQB0-14;Q9NQB0-15;Q9NQB0-16;Q9NQB0-17;Q9NQB0-2;Q9NQB0-3;Q9NQB0-4;Q9NQB0-5;Q9NQB0-6;Q9NQB0-7;Q9NQB0-8;Q9NQB0-9	0	0	0.419101	0	0	0	0	0	0	0	-0.419101
A0A0A0MTN0;Q13617;Q13617-2	0	0	0	0.0176777	0	0	0	0	-0.0176777	0	0
A0A0A0MTN3	-0.55019	0	0	0	0	0	0	0	0.55019	0	0
A0A0A0MTP7;F8VXG7;Q99590;Q99590-2	0	0	0.586566	0	0	0	0	0	-0.586566	0	0
A0A0A0MTQ3;Q96N23;Q96N23-2	-0.440307	0	0	0	-0.559693	0	0	0	0	0.697791	0.302209
A0A0A0MTQ8;P0C221	0	0	-0.418299	0	0.375577	-0.32522	0.37287	0	0	0.251554	-0.256481
A0A0A0MTR7;Q63HN8	0	0	0	0	0.283875	0	0	-0.0818192	-0.202056	0	0
A0A0A0MTS7;Q8WZ42;Q8WZ42-12;Q8WZ42-13;Q8WZ42-2;Q8WZ42-8	0	0	0.293145	0	0	0	0	0	0	-0.293145	0
A0A0A0MTS9;K7EKZ0;K7EP24;K7ER94;Q2V2M9;Q2V2M9-2;Q2V2M9-3;Q2V2M9-4	0	0	0	0	-0.586659	-0.413341	0	0	0.504695	0	0.495305
A0A0A0MTU3;Q4ZIN3;Q4ZIN3-2	0	0	0	0	0	0	0	0	0	0	0
A0A0A6YYA0;Q86XR7-2;Q9Y3B3;Q9Y3B3-2	0	0.0351745	0	0	-0.0351745	0	0	0	0	0	0
A0A0A6YYC0;E9PJN1;O75676;O75676-2	0	0	0	0	0.353447	0	0	0	-0.353447	0	0
A0A0A6YYC7;Q96JP5;Q96JP5-2	0	0	-0.300706	1	0	0	0	0	-0.699294	0	0
A0A0A6YYG9;F8WCF6;F8WDD7;P59998;P59998-2;P59998-3	0	0	0	0	0	0	0	0	0	0	0
A0A0A6YYH1;Q7Z6K5;Q7Z6K5-2	0	0	0	0	0	0	0	0	0	0	0
A0A0A6YYI3;A0A0B4J1V8;A8MV53;Q9NQ55;Q9NQ55-2;Q9NQ55-3	0	0	-0.261221	0	0	0	0	0	0	0	0.261221
A0A0A6YYL2;P0DMM9;P0DMM9-3;P0DMN0	0	0	0	0	0	0	0	0	0	0	0
A0A0A6YYL4;P57737-3	0	0	0	0	0	0	-0.682224	0	0	0.682224	0
A0A0B4J1R2;Q9H6R3	0	0	0	0	0	0	0	0	0	0	0
A0A0B4J1R4;P32754	0	0	0	0	0	0	0	0	0	0	0
A0A0B4J1R7;Q96B45
A0A0B4J1S8;Q9UBF8;Q9UBF8-2;Q9UBF8-3	0	0	0	-1	0	0	0	0.414676	0.585324	0	0
A0A0B4J1W0;B9TX62;F5GY88;H0YEG1;O75448;O75448-2	0	0	-0.179041	0	0	0	0	0	0	0	0.179041
A0A0B4J1Y2;Q8NDW8;Q8NDW8-3;Q8NDW8-5;Q8NDW8-6;Q8NDW8-7	0	0.666815	0	0	0	0	0	0	0	-0.666815	0
A0A0B4J1Z1;C9JAB2;Q16629;Q16629-2;Q16629-3;Q16629-4	0	0	0	0	0	0	0	0	0	0	0
A0A0B4J269
A0A0B4J291;Q8N8U2	-0.294849	0	0	-0.705151	1	0	0	0	0	0	0
A0A0B4J294;H3BP13;Q9UL33;Q9UL33-2	0	0	0	-0.381709	0	0	0	0	0.381709	0	0
A0A0B4J297;I3L4V0;Q9BRA0;Q9BRA0-2	0	0	0	0	0	0	0	0	0	0	0
A0A0B4J2A0	0	0	0	0	0	0	0	0	0	0	0
A0A0B4J2C2;F8WF49;Q9Y2H0;Q9Y2H0-1;Q9Y2H0-3	0	0	0	0	0	0	0	0	0	0	0
A0A0B4J2C3;J3KPG2;P13693;Q5W0H4	0	0	0	1	0	0	0	-1	0	0	0
A0A0B4J2D5;P0DPI2	0	0	0	0	0	0	0	0	0	0	0
A0A0B4J2E5;Q15269	0	0	-0.236552	0	0.236552	0	0	0	0	0	0
A0A0B4J2F0	0	0	0	0	0	0	0	0	0	0	0
A0A0B4J2F8;E2QRJ6;F6S314;P52435	0	0	0	0	0	0	0	0	0	0	0
A0A0B4J2G4;Q15345;Q15345-3	0	0	1	-0.602105	0	0	0	0	-0.397895	0	0
A0A0C3SFZ9;M0QXD1;M0QY09;M0QZE1;M0QZI3;M0R1K4;M0R3E5;O14526;O14526-2;O14526-3	0	0	0	0	0.596854	0	0	0	-0.596854	0	0
A0A0C4DFL7;Q16850	0	0	0	0	0	0	0	0	0	0	0
A0A0C4DFL8;F5GX28;O94953	0	0	0	0	0	0	0	0	0	0	0
A0A0C4DFM1;Q92544	0	0	0	0	0.0289513	0	0	-0.0289513	0	0	0
A0A0C4DFM7;Q5TAX3
A0A0C4DFP6;Q5T4F6;Q9NQ79;Q9NQ79-2;Q9NQ79-3	0	0	0	0	0	0	-0.298031	0	0	0.298031	0
A0A0C4DFR1;O75069;O75069-2;O75069-3;O75069-5
A0A0C4DFU4;Q9HBG7-4
A0A0C4DFV0;Q9H469	0	0	0	0.541652	0	0	0	-1	0.458348	0	0
A0A0C4DFW4;Q5JUR7	0	0	-0.586209	0	0	0	0.310415	0	0	0	0.275794
A0A0C4DFX9;Q9H3P2	0	0	-0.485912	0	0	0	0	0	0	0.485912	0
A0A0C4DFY5;A8MXZ4;J9JIE0;Q9NQ84;Q9NQ84-2	-0.21572	-0.478644	0	0	0	0.103326	0	0	0	0	0.591038
A0A0C4DFY7;Q6UWW8;Q6UWW8-2	-0.182143	0.412873	0	0	-0.246683	-0.231139	0	0	0	0	0.247092
A0A0C4DFZ2;P15289;P15289-2
A0A0C4DG02;F8WE91;Q9Y6K1;Q9Y6K1-2	0	0	0	0	0	0	0	0	0	0	0
A0A0C4DG17;C9J9K3;P08865	0	-0.6113	0	0	0	0	0.286505	0	0	0.324795	0
A0A0C4DG26;Q9NP71;Q9NP71-2;Q9NP71-3;Q9NP71-4;Q9NP71-6	0	0	-0.216205	-0.783795	0	0	0	0.326188	0.673812	0	0
A0A0C4DG40;Q8NF91;Q8NF91-4	0	0	1	0	0	0	-1	0	0	0	0
A0A0C4DG51;Q9NP80;Q9NP80-3	0	0	0	0	0	0	-0.0582159	0	0	0.0582159	0
A0A0C4DG62;F5GYV5;F8WCT1;H7BZV4;Q66PJ3;Q66PJ3-2;Q66PJ3-3;Q66PJ3-4;Q66PJ3-7	0	0	0.39066	0	0	0	0	0	0	0	-0.39066
A0A0C4DG80;Q9P2N7;Q9P2N7-2;Q9P2N7-3;Q9P2N7-4;Q9P2N7-5
A0A0C4DG85;P40394;P40394-2	0	0	0	0	0	0	0	0	0	0	0
A0A0C4DG88;P14859;P14859-2;P14859-3;P14859-4;P14859-5;P14859-6	0	0	-0.383558	0	0.383558	0	0	0	0	0	0
A0A0C4DG89;Q7L014	0	0	0	0	0	0	0	0	0	0	0
A0A0C4DG90;A4D0S4;A4D0S4-3	0	0	0.379408	0	0	-0.280454	0	0	0	0	-0.0989547
A0A0C4DG91;A0A2R8Y7V2;C9J9V6;C9JQB1;O75414	0	0	0	0	0	0	0	0	0	0	0
A0A0C4DG95;C9IYJ2;E9PD56;F8WDF7;H7BYG4;Q7Z7A4;Q7Z7A4-2;Q7Z7A4-4;Q7Z7A4-6;W5RWE6	0	0	-0.160313	0	0.238216	0	0	0	0	0	-0.0779031
A0A0C4DGA2;O75521;O75521-2	0	0	0	0	0	0	-0.271085	0	0	0.271085	0
A0A0C4DGA6;Q14527;Q14527-2	0	0	0.351968	0	0	-0.208444	0	0	0	-0.253429	0.109905
A0A0C4DGA7;O94929;O94929-3	0	0	0.255844	0	0	-0.319283	0	0	0	0	0.0634396
A0A0C4DGB0;Q9UIL1;Q9UIL1-2;Q9UIL1-3	0	0	0	1	0	0	0	0	-1	0	0
A0A0C4DGB9	0	0	0	0	0	0	0	0	0	0	0
A0A0C4DGE4;A0A0J9YW33;A0A286YF28;Q13277;Q13277-2;Q13277-3	0	0	0.237586	0	0	-0.189554	0	0	0	0	-0.0480319
A0A0C4DGE7;Q86UK5;Q86UK5-2;Q86UK5-3	0	0	0.0903242	0.628808	0	0	0	0	-0.719132	0	0
A0A0C4DGF7;Q6UXC1;Q6UXC1-2;Q6UXC1-3	0	0	0	0	0	0	0.000631442	0	0	-0.000631442	0
A0A0C4DGG1;Q9UKS6	0	0	0	0	0	0.0719011	0	0	0	0	-0.0719011
A0A0C4DGG9;A0A2R8Y212;A0A2R8Y425;A0A2R8Y521;A0A2R8Y5J0;A0A2R8YFK9;A0A2U3TZM0;F5GWX5;Q14839;Q14839-2	0	0	0	0	0	0	0	0	0	0	0
A0A0C4DGH0;Q5ZPR3;Q5ZPR3-3;Q5ZPR3-4	0	-0.00761198	0	0	0	-0.0323045	0	0	0	0	0.0399165
A0A0C4DGH6;A0JNW5	0	0	-0.376941	0	0.337009	0	0	0.214848	-0.174916	0	0
A0A0C4DGI4	0	0	0	0	-0.331137	0	0.377519	0	0	-0.668863	0.622481
A0A0C4DGM9;B7Z896;F5H3M2;Q9BVG8;Q9BVG8-2;Q9BVG8-4;Q9BVG8-5;Q9BVG8-6	0	0	-0.522033	0	0	0.34788	0	0	0	-0.179666	0.353819
A0A0C4DGN6;J3QRU8;Q9Y2X7;Q9Y2X7-3	0	0	0	0	0	0	-0.739573	0	0	0.739573	0
A0A0C4DGP0;E7EU35;Q9UKF7-2	0.652266	0	0	-0.652266	0	0	0	0	0	0	0
A0A0C4DGQ4;Q86W25	1	0	0	0	0	0	0	0	-1	0	0
A0A0C4DGQ5;P04632	0	0	0	0	0	0	0	0	0	0	0
A0A0C4DGQ8;Q6IAN0	0	0	0	0	0	0	0	0	0	0	0
A0A0C4DGR2;M0QY25;M0QYH7;M0QYQ4;M0QZQ2;Q71SY5;Q71SY5-4;Q71SY5-5;Q71SY5-6;Q86YD1;Q86YD1-2	0	0	0	0	0	0	0	0	0	0	0
A0A0C4DGS1;P39656;P39656-3	0	0.436252	0	0	0	0	0	0	0	-0.436252	0
A0A0C4DGV4;E9PLX3;O43504;R4GMU8
A0A0C4DGZ4;Q9Y5U4	0.214112	0.350504	0	0	-0.767337	0	0	0	0	0	0.202721
A0A0C4DH01;Q9NVU0;Q9NVU0-2;Q9NVU0-3;Q9NVU0-4;Q9NVU0-5	0.330564	0	-0.201794	0	0	0	0	0.0345896	-0.16336	0	0
A0A0C4DH13;E5RG96;J3KQJ9;Q8N2E2
A0A0C4DH16;B8ZZS0;H7BXT7;Q9NYM9	0	0	0	0	-0.241247	0	0	0.241247	0	0	0
A0A0C4DH36	0	0	0	0	-0.355529	-0.306426	0	-0.338045	0.536298	0.463702	0
A0A0D2X7Z3;Q49AN0;Q49AN0-2	-1	0	0	0	0.530979	0	0	0	0.469021	0	0
A0A0D9SEI0;Q9P0P8	0	0	0	0	0	0	0	0	0	0	0
A0A0D9SEI3;A0A0D9SEN2;A0A0D9SER5;P21127;P21127-2;P21127-3;P21127-8	0	0	0	0	0	0	0	0	0	0	0
A0A0D9SEJ5;F5GY05;Q96EK7;Q96EK7-2	0	0	0	0	0.00234114	0	0	0	0	-0.00234114	0
A0A0D9SEK1
A0A0D9SEN7;A0A2R8Y7Z3;I3L0L0;Q13950;Q13950-2;Q13950-3	0	0	1	0	0	-1	0	0	0	0	0
A0A0D9SES8;H0YKN8;H0YKT5;H0YL70;H0YNI7;H0YNT2;Q04724;Q04726;Q04726-2;Q04726-3;Q04726-4;Q04726-5;Q04726-6;Q04726-7;Q04727;Q04727-2;Q04727-3;Q04727-4	0	0	0	0	-0.435357	0	0	0	0.435357	0	0
A0A0D9SET2;A0A0D9SFD0;A0A0D9SGI5;A0A0R4J2G5;A0A1B0GTW4;A0A1B0GV32;D6R942;D6RB91;D6RC63;D6RCM6;D6RG14;D6RG21;D6RJA7;D6RJG6;D8L7E9;H0YM62;Q02078;Q02078-2;Q02078-3;Q02078-4;Q02078-5;Q02078-6;Q05BX2;Q06413;Q06413-2;Q06413-3;Q06413-4;Q06413-5;Q06413-6;Q14814;Q14814-2;Q14814-3;Q14814-4;Q14814-5;Q14814-6	0	0	0	0	0	0	0	0	0	0	0
A0A0D9SEU5;Q6VN20;Q6VN20-3;R4GMX8	0	0	0	0	0	0	0	0	0	0	0
A0A0D9SEX5;Q9H6R6;Q9H6R6-2	-0.0550144	0.382417	0	0	0.387171	-0.386753	0	0	0	0	-0.32782
A0A0D9SEY1;E7EN19;E7ENQ1;G3XAA2;G5E948;H7C360;O95819;O95819-2;O95819-3;O95819-4;O95819-5;O95819-6
A0A0D9SF44;A0A0R4J2E2;Q9Y3T6;Q9Y3T6-3	0	0	0	0	0.43781	0	0	0	-0.43781	0	0
A0A0D9SF53;A0A0D9SFB3;A0A0D9SG12;A0A2R8Y4A4;A0A2R8Y645;A0A2R8YCW1;A0A2R8YF78;A0A2R8YFR4;A0A2R8YFS5;A0A2U3TZJ9;O00571
A0A0D9SF60;Q99569;Q99569-2	0	0	-0.265449	0	0	0	0.347546	0	0	0	-0.0820967
A0A0D9SF63;Q9BZK7	0	0	0.597207	0	0	0	0	0	-0.597207	0	0
A0A0D9SFB1
A0A0D9SFB5;P08319;P08319-2	0	0	0	0	0	0	0	0	0	0	0
A0A0D9SFE1;Q9H936	0	0	0	0	0	0	0	0	0	0	0
A0A0D9SFG6;O43739;O43739-2;Q15438;Q15438-2;Q15438-3;Q99418;Q99418-2	0	0	-0.316735	-0.683265	0	0	0	0	1	0	0
A0A0D9SFJ2;A0A1B0GWF1;A0A2R8Y5Y4;A0A2R8Y6P1;Q6ZU35
A0A0D9SFK2;Q92614;Q92614-3;Q92614-4
A0A0D9SFR6;Q16760;Q16760-2;Q86XP1;Q86XP1-2;Q86XP1-3;Q86XP1-5	-0.600679	0	0.327882	0	0	0	0	-0.399321	0.672118	0	0
A0A0D9SFT8	0.395892	0	0	0	-0.653596	0	0	0.0236467	0	0	0.234057
A0A0D9SG71;P49459;P49459-3	0	0	0	0.569466	0	0	0	0	-0.569466	0	0
A0A0D9SG72;A0A1B0GTP9;A0A1B0GVQ5;A0A1B0GWF2;A0A2R8Y5D4;P61764;P61764-2	0	-0.043684	0	0	0	0	0	0	0	0	0.043684
A0A0D9SG79;Q9NZ09;Q9NZ09-3;Q9NZ09-4
A0A0D9SG96;Q9ULB1-3	0	0	0	0	0.353695	0	0	-0.367666	0.0139709	0	0
A0A0D9SGD6;B0QZE2;B7Z2J6;E7ENI9;E7EV75;Q15326;Q15326-2;Q15326-5	0	0	0.362241	0	-0.362241	0	0	0	0	0	0
A0A0D9SGF6;Q13813;Q13813-2	0	0	-0.339864	0	0	0	-0.091435	0	0	0	0.431299
A0A0D9SGH0;A0A1B0GV11;Q92581;Q92581-2;Q92581-3	0	0	0	0	-0.0190229	0	0	0.0190229	0	0	0
A0A0D9SGJ6;C9JFZ1;J3KPK1;J3KQV8;O43426;O43426-2;O43426-4
A0A0G2JH30;A0A0G2JPX0;A0A2R8YFP9;A6NK88;P49918;P49918-2	0	0	0	-1	1	0	0	0	0	0	0
A0A0G2JH68;O60610	0	0	0	0	0	0	0	0	0	0	0
A0A0G2JHC2;Q6NYC8	0	0	0	0	0	-0.214954	0.233999	0	0	0	-0.0190448
A0A0G2JHL0;A0A0G2JK44;A0A140T9E9;A0A140T9F7;A0A140T9V2;H0Y6K2;P25440;P25440-2;P25440-3;U3KQA6	0	0	0	0	0	0	0	0	0	0	0
A0A0G2JI43;A0A0G2JIJ2;A0A140T926;A0A140T9C9;A0A140T9I2;A0A140T9R0;A0A140T9R2;A0A140T9T8;A0A140T9U6;F6UB75;P28068	0.467297	0	0	0	0.532703	0	0	0	-1	0	0
A0A0G2JIR1;A0A0G2JIS2;A0A0G2JK64;A0A0G2JRN8;A0A0G2JRR0;A2ABF8;A2ABF9;Q96KQ7;Q96KQ7-2	0	0	0	0	0	0	0	0	0	0	0
A0A0G2JIW1;P0DMV8;P0DMV9	0	0	0	0	0	0	0	0	0	0	0
A0A0G2JJD3;O95870	0	0	0	0	0	0	0	0	0	0	0
A0A0G2JJP1;Q9C019
A0A0G2JL52;A0A140T8Y0;A0A140TA35;B4E0K6;Q5ST30;Q5ST30-4	0	0	0	0	0	0	0	0	0	0	0
A0A0G2JLK7
A0A0G2JLQ8;A0A0G2JLX3;A0A0G2JNC8;A0A0G2JP37;A0A0G2JPB6;A0A0G2JPQ2;F5H5B1;F5H7Q5;J3KN39;K7EJ90;K7ELX1;Q9NX02;Q9NX02-2;Q9NX02-3;Q9NX02-4	0	0	0.386794	0	0	0	0	-1	0	0	0.613206
A0A0G2JM39;A0A0G2JN91;A0A0G2JNH1;M0QYD1	0	0	0.435901	0	0	0	0	0	0	-0.435901	0
A0A0G2JM63;A0A0G2JNK3;A0A0G2JPH3;Q8WX94-2;Q8WX94-3
A0A0G2JM70;Q9NV79;Q9NV79-2;Q9NV79-3;V9GZ41	0	0	0	0	0	0	0	0	0	0	0
A0A0G2JMD2;A0A2R9YJI8	0	0.312766	0	0	-0.312766	0	0	0	0	0	0
A0A0G2JMW3;A0A0G2JP44;Q9HBB8;Q9HBB8-2;Q9HBB8-4	0	0	1	0	0	0	0	0	0	0	-1
A0A0G2JMX7;A0A0G2JPD5;A0A0G2JQJ7;A0A0G2JS76;P10636;P10636-6;P10636-7;P10636-8;P10636-9
A0A0G2JMZ6;O60282	-0.376876	0	0	0	-0.623124	0	1	0	0	0	0
A0A0G2JMZ8;Q16625	0	0	0.237989	0	0	0.391773	0	0	0	0	-0.629762
A0A0G2JN23;A0A0G2JQ38	0	0	0.569829	0	0	-0.425443	0	0	0	0	-0.144386
A0A0G2JN42;A0A0G2JNJ8;Q6W4X9	0	0	-1	0	1	0	0	0	0	0	0
A0A0G2JN53	0	0	0	0	0	0	0	0	0	0	0
A0A0G2JN84;P59817	-0.344866	0	0	-0.655134	0.254204	0	0	0	0.745796	0	0
A0A0G2JNW7;Q9Y666	0	0.088421	0	0	0	-0.245146	0	0	0	0	0.156725
A0A0G2JNZ2;A0A669KB89;Q14160	0	0	0	0	0	0	-0.0582031	0	0	0	0.0582031
A0A0G2JPC8;B4DTC2;E7EPX8;E7ER82;Q8TC27	0	0	0	0	-0.28849	0	0	-0.270123	0.558613	0	0
A0A0G2JPZ6;A0A0J9YWU2;Q9H3Q3	0	0.0536554	0	0	0	-0.307235	0	0	0	0.556765	-0.303186
A0A0G2JQC6;A0A0G2JQK9;A0A0G2JRT1;E7EWN1;Q99102-3	0	0	1	0	0	-1	0	0	0	0	0
A0A0G2JQT1;A0A0G2JR96	0	0	0	0	-0.227898	0	0	0	0	0.341549	-0.113651
A0A0G2JRG1
A0A0G2JS52;Q01538;Q01538-2	-0.267273	0	0.664482	0	-0.397208	0	0	0	0	0	0
A0A0J9YVP6;Q9UHX1-2	0	0	0	0	0	0	0	0	0	0	0
A0A0J9YVW4	-0.575757	0	0	0	0	0	0	0	0.575757	0	0
A0A0J9YW18;F6RP06;Q12983	0	0	0	0	0	0	0	0	0	0	0
A0A0J9YW63	-0.304537	0	0	0	0.627777	-0.358748	0.372223	0	0	0	-0.336716
A0A0J9YWD2;A0A0J9YX19;A0A0J9YXY6;A0A0J9YYK8;A0A1B0GTJ5;A0A1B0GU79;A0A1B0GUR8;A0A1B0GVR1;Q9UBY8	0	1	0	0	-1	0	0	0	0	0	0
A0A0J9YWD5;A0A0J9YX88;A0A0J9YYB5;B7ZM65;E9PJ24;F8WEF5;Q9P1Y6;Q9P1Y6-2;Q9P1Y6-3	0	0	0	0	0	0	0	0	0	0	0
A0A0J9YWE1;A0A0J9YWN0	0.255799	0	0	0	0.455334	0	0	0	0	-1	0.288867
A0A0J9YWL0;Q9Y4K1	0	0	-0.777292	0	0	0	0	0	0	0.354179	0.423113
A0A0J9YWR7;A0A0J9YXE4;Q8N2F6;Q8N2F6-2;Q8N2F6-3;Q8N2F6-4	0	0	0	0	0	0	0	0	0	0	0
A0A0J9YWV4;O75154;O75154-2;O75154-3;X6RFI8	0	0	0	1	-1	0	0	0	0	0	0
A0A0J9YX34;A0A6Q8PEY7;A0A6Q8PF18;A0A6Q8PF63;A0A6Q8PF74;A0A6Q8PFB0;A0A6Q8PFI4;A0A6Q8PFM2;A0A6Q8PFS5;A0A6Q8PFV0;A0A6Q8PFX3;A0A6Q8PG16;A0A6Q8PGE9;A0A6Q8PGG4;A0A6Q8PGL5;A0A6Q8PH06;A0A6Q8PHE9;A0A6Q8PHG4;A0A6Q8PHP4;A0A6Q8PHR6;C9J084;Q9C040;Q9C040-2	0	0	0	0	0	-0.431214	0	-0.568786	0	0	1
A0A0J9YX62;C9J2C4;O75190;O75190-2;O75190-3	0	0	0	0	0	0	0	0	0	0	0
A0A0J9YX66;A0A0J9YXJ0;A0A1B0GU44;A0A1B0GUN8;E9PC62;O95319;O95319-2;O95319-3;O95319-4;O95319-5;Q5VZZ6;V9GYD9	0	0	1	0	-1	0	0	0	0	0	0
A0A0J9YXF2;Q15165;Q15165-1	0	0	0	0	0	0	0	0	0	0	0
A0A0J9YXM6;Q562E7	0	0	0	0	0	0	0	0.321182	-0.321182	0	0
A0A0J9YXN7	0	0	0	0	0	0	0	0	0	0	0
A0A0J9YXT0;H7C5H6;Q9H0F7;Q9H0F7-2
A0A0J9YY17;A0A1C7CYW8;A0A669KB38;Q8IVF4	0	0	0	0	0	-1	1	0	0	0	0
A0A0J9YY72;A0A1W2PQQ1;Q5HYW2	-0.572032	0	-0.427968	0	0	0	0	0	0	0	1
A0A0J9YYF0	0	0	0	0	0	0	0	0	0	0	0
A0A0J9YYF7;Q86T65;Q86T65-4	0	0.661545	-0.234821	0	0	0.338455	0	0	0	-0.495749	-0.26943
A0A0K0K1A5	0	0	0	0	0.303062	0	0	-0.333309	0.0302474	0	0
A0A0R4J2E8;D6REM6;P43243	0	0	0	0	0	0	0	0	0	0	0
A0A0R4J2F3;P0DPB6	0	0	0.634945	0	0	0	0	0	-0.634945	0	0
A0A0R4J2F6;Q12894;Q12894-2
A0A0S2Z4L3;A0A3B3ISJ1;G5E9F8;P07225	0.2173	0.144386	0	0	0	0	0	0	0	0	-0.361686
A0A0S2Z4L7;O60603	0	0	0	0	0.447589	-0.406554	0	0	0	0	-0.0410351
A0A0S2Z4Q7;A0A1W2PQQ6;A0A1W2PQR0;A0A1W2PR45;A0A1W2PRC6;A0A1W2PRD9;A0A1W2PRY1;A0A1X7SBT2;C9JYS9;Q9UNP4;Q9UNP4-2;Q9UNP4-3	0	0	0	0	0	0	0	0	0	0	0
A0A0S2Z5D0;A0A1B0GTU6;H3BUV4;Q9NWW5;Q9NWW5-2	0	0.248061	0	0	0	-0.265216	0	0	0	0	0.0171543
A0A0U1RQE4;A0A494C1M0;Q5HYK7;Q5HYK7-2;Q5HYK7-3	0	0	0	1	0	0	0	-0.420182	-0.579818	0	0
A0A0U1RQK7
A0A0U1RQK9	0	0	0	0	0	0	0	0	0	0.443739	-0.443739
A0A0U1RQQ9;Q6P3W7
A0A0U1RQS4;A0A0U1RR93;Q9BYB0;Q9BYB0-3	0	0	0	0	-0.245027	-0.428462	0.535041	0	0	0	0.138448
A0A0U1RQT8;Q8TCZ2;Q8TCZ2-2;Q8TCZ2-3;Q8TCZ2-5	-0.23157	0	0	0	0	-0.0544275	0	0	0	0	0.285998
A0A0U1RQW3;Q8WXE1;Q8WXE1-2
A0A0U1RQW6;E7EPU2;Q9Y2E4	1	0	-1	0	0	0	0	0	0	0	0
A0A0U1RQY4	0	0.49342	-1	0	0.50658	0	0	0	0	0	0
A0A0U1RR06;Q9Y484;Q9Y484-2;Q9Y484-3	0.758514	0	0	-0.758514	0	0	0	0	0	0	0
A0A0U1RR16;A0A3B3IRZ7;Q8NEY4;Q8NEY4-2
A0A0U1RR25	0.441227	0	0	0	0.558773	-0.574889	0	0	0	0	-0.425111
A0A0U1RR27;H3BTW5;Q7Z401;Q7Z401-2	0	0	0	0	0	0	0	0	0	0	0
A0A0U1RR32;A0A0U1RRH7;P0C0S8;P20671;Q96KK5;Q99878;Q9BTM1	0	0	0	0	0	0	0	0	0	0	0
A0A0U1RR76;A6NJ78;A6NJ78-2;A6NJ78-4;P0C7V9	0	0	0	0	0	0	0	0	0	0	0
A0A0U1RRA6;B5MCG9;B5MCU0;H7C0E9;Q9Y2K5	0	0	0	1	0	0	0	-0.394679	-0.605321	0	0
A0A0U1RRB6;J3QT38;Q9Y2D4;Q9Y2D4-2
A0A0U1RRB9;F2Z2V1;Q96C11;Q96C11-3	0	0	0	0	0	0	0	0	0	0	0
A0A0U1RRK1;A0A286YF11;F6XEV2;Q9BPX6;Q9BPX6-3	0	0	0	0	0	0	0.285804	0	0	-0.285804	0
A0A0U1RRL7	0	0	-0.0810624	0	0	0	0	0	0	0.366036	-0.284974
A0A0U1RRL8;Q8TB22;Q8TB22-2;Q8TB22-3	0	0	0	0	0	0	0	0	0	0	0
A0A126GWB3;P47888	-0.650971	0	0	0	0.348767	0	0.302204	0	0	0	0
A0A140LJL2;Q8N350	0	0	0	0	-0.536756	0	0	-0.463244	0	0	1
A0A140T8Y3;A0A140T902;A0A140T9C0;A0A140TA33;A0A140TA41;A0A140TA52;A0A3B3ISX9;P22105;P22105-1;P22105-4	0	0	0	0	0	0	0	0	0	0	0
A0A140T913;A0A140T933;A0A140T955;A0A140T9I0;A0A140T9X5;A0A1W2PRT9;Q53Z42	0	-0.016095	0	0	0	0.0362745	0	0	0	0	-0.0201796
A0A140T951	0	-0.411217	0	0	0	0.192491	0	0	0	0	0.218726
A0A140T962;A0A140T9B3;A0A140T9J9;A0A1W2PR11;Q5QT33	0	-0.0620987	0	0	0	0.353275	0	0	0	0	-0.291176
A0A140T9G8;Q0P5T2;Q5SQH8;Q5SQH8-2;Q5SQH8-4	0	0	-0.388414	0	0	0	0	0	0	0.612573	-0.224159
A0A140T9T7;Q03518	0	0	0	0	0	0	0	0	0	0	0
A0A140TA01;E9PQT8;E9PQZ5;O43189;O43189-2	0	0	-0.277924	0	0	0	0	0	-0.722076	0	1
A0A140TA09;Q99942
A0A182DWF2;A0A182DWF3;Q9NNW7;Q9NNW7-2	0	0	0	0	0	0	0	0	0	0	0
A0A182DWH7;P49908
A0A182DWI4;E9PN30;Q9BQE4	-0.00281703	0.652087	0	0	-0.64927	0	0	0	0	0	0
A0A1B0GTB0;A0A1B0GTU8;A0A1B0GU12;A0A1B0GUT7;A0A1B0GVB9;A0A1B0GVC7;A0A1B0GVW0;A0A1B0GWJ8;A0A1C7CYW4;B7Z413;H7C3E1;O75787;O75787-2	0	0.416743	0	0	0	-0.514573	0	0	0	0	0.0978301
A0A1B0GTF3;A0A6I8PIT5;A0A6I8PIW1;A0A6I8PLB1;O43301	-0.0293254	0	0	0	-0.369436	0	0	0	0	0	0.398761
A0A1B0GTG2;A0A1B0GW77;P49419;P49419-2	0	0	0.291627	0	0	0	-0.564985	0	0	0.273359	0
A0A1B0GTJ7;A0A1B0GWJ0;P30566	0	0	0	-0.305684	0	0	0	0	0.305684	0	0
A0A1B0GTJ8;A0A1B0GV63;A0A1B0GVK1;A0A1B0GWJ2;A0A3F2YNW7;A0A6Q8NVI4;H0Y7H8;Q8NFD5;Q8NFD5-2;Q8NFD5-3;Q8NFD5-4	0	0	0	0	0	0	0	0	0	0	0
A0A1B0GTK6	0	0	0	-1	1	0	0	0	0	0	0
A0A1B0GTM1;A0A1B0GUM5;E7ETX0;Q8NHX9	1	0	0	0	-1	0	0	0	0	0	0
A0A1B0GTM3;A0A1B0GUA4;A0A1B0GUH5;A0A1B0GW68;Q13510;Q13510-2
A0A1B0GTT2	0	0	0	0	-0.645169	0.343169	0	0.302001	0	0	0
A0A1B0GTU4	0	0	0	-1	0	0	1	0	0	0	0
A0A1B0GTU5;H0Y488;O14497;O14497-2;O14497-3	0	0	0	0	0	0	0	0	0	0	0
A0A1B0GTU7;H0YD36;P54098	0	0	0	0	0	0	0	0	0	0	0
A0A1B0GTV6	0	0	0.464437	0	0	0	0	0	0	-0.148787	-0.31565
A0A1B0GTW1;A0A2R8YDH4;A0A3B3ITE1;Q9UDY2;Q9UDY2-3;Q9UDY2-7	0	0	0	0	0	0	0	0	0	0	0
A0A1B0GTX1;A0A1C7CYY6;Q6XZF7;Q6XZF7-2	0	0	-0.00619021	0	0	0	0	0	0.00619021	0	0
A0A1B0GUA3;A0A6Q8PGG2;A0A6Q8PH45;A0A6Q8PHL8;Q96EK5	0	0	0	1	-1	0	0	0	0	0	0
A0A1B0GUC2;A0A1W2PP33;C9J7I0	0.385863	0	0	0	0	-0.385863	0	0	0	0	0
A0A1B0GUF4	0	0.579678	0	0	-0.579678	0	0	0	0	0	0
A0A1B0GUI1;Q6GYQ0;Q6GYQ0-2;Q6GYQ0-3;Q6GYQ0-4;Q6GYQ0-5;Q6GYQ0-6;Q6GYQ0-7	0	0	0	0	0.28519	-1	0	0	0	0	0.71481
A0A1B0GUL3	0	0	0	0	-1	0	0	0	0.492765	0	0.507235
A0A1B0GUN5	0	0	-0.779899	0	0	0	0.396778	0	0	0	0.383121
A0A1B0GUN9
A0A1B0GUS7	0.273745	0	0	0	0	0	0	-0.353468	0.0797237	0	0
A0A1B0GUZ2;P00797;P00797-2	-0.533622	0	0	0	0.601842	0	0	0.398158	-0.466378	0	0
A0A1B0GUZ7;Q14156;Q14156-2	0	-0.399983	0	0	0	-0.26584	0	0	0	0	0.665823
A0A1B0GV47;Q7Z4S6;Q7Z4S6-2;Q7Z4S6-4;Q7Z4S6-5;Q7Z4S6-6
A0A1B0GV71;A0A1B0GW34;A0A1B0GWD3;B4DFF3;H3BNK7;H3BR00;O95086;Q13286;Q13286-2;Q13286-3;Q13286-4;Q13286-5;Q13286-7;Q2TA70;Q9UBD8	0	0	0	0	1	-0.476711	0	0	0	0	-0.523289
A0A1B0GVD5;A0A1B0GVP3;A0A1B0GW44;A0A1B0GWE8;P07339	0	-0.640768	0	0	0	0.640768	0	0	0	0	0
A0A1B0GVG4	0	0	0	0	-0.285442	0	0	0.318776	-0.033334	0	0
A0A1B0GVI7;A0A2R8Y7G1;P35869	0	0	-1	0	0	0	0	0	1	0	0
A0A1B0GVL3;Q05086;Q05086-2;Q05086-3	0	0	0	-0.51269	0	0	0	0	0.51269	0	0
A0A1B0GVV3;Q5EBL4	0	0	0	0	0	0	0	0	0	0	0
A0A1B0GVV8	0	0	0	0	0.402706	0	0	0.288799	-0.691505	0	0
A0A1B0GW05	1	-1	0	0	0	0	0	0	0	0	0
A0A1B0GW23;Q03154	0	0	0	0	0	0	0	0	0	0	0
A0A1B0GW38
A0A1B0GW41;E9PEN0;Q8WYH8;Q8WYH8-2	0	0	0	0	0	0	0	0	0	0	0
A0A1B0GWB2	0	0	0.489067	0	0	-1	0.223743	0	0	0	0.287189
A0A1B0GWD8;Q9C093-4
A0A1B0GWI2;O75503	0	0	0.229746	0	0	0.0722394	0	0	0	-0.437453	0.135468
A0A1C7CYX0	0	0.178915	0	0	0	-0.297223	0	0	0	0	0.118308
A0A1C7CYX9	0	0	0	0	0	0	0	0	0	0	0
A0A1D5RMN4;P23945;P23945-2;P23945-4
A0A1P0AYU5;Q9BWM7	0	0	0	0	0	0	0	0	0	0	0
A0A1W2PNF0;A0A1W2PNY6;A0A1W2PPE6;A0A1W2PPG9;A0A1W2PPH4;A0A1W2PQ13;A0A1W2PQ60;A0A1W2PQD6;A0A1W2PQH2;A0A1W2PQL8;A0A1W2PR66;A0A1W2PRN3;A0A1W2PRT7;A0A1W2PS45;A0A1W2PS77;A0A1W2PSA9;A0A1W2PSD1;Q9Y2D2;Q9Y2D2-2;Q9Y2D2-3	0	0.551934	0	0	0	0	0	0	0	-0.551934	0
A0A1W2PNH8;A0A1W2PNQ8;A0A1W2PNR0;A0A1W2PNW5;A0A1W2PPB6;A0A1W2PPR7;A0A1W2PQA9;A0A1W2PQP4;A0A1W2PQZ1;A0A1W2PS19;K7ELE1;K7EPJ2;O95427	-0.363208	0	0	0	-0.636792	0	0	0	0	0.442438	0.557562
A0A1W2PNP0;Q969N2;Q969N2-5	0	0	0	0	0	0	0	0	0	0	0
A0A1W2PNR9;Q9Y5U9	0	0.683095	0	0	-0.590359	-0.092736	0	0	0	0	0
A0A1W2PNT1	0	0	-0.277533	0	1	0	0	0	-0.722467	0	0
A0A1W2PNU4;A0A286YES2;F8VYC4;P0DJD0;P0DJD1	0	1	-0.590727	0	0	0	0	0	0	-0.409273	0
A0A1W2PNV4	0	0	0	0.0125679	0	0	0	0	-0.0125679	0	0
A0A1W2PNW1;A0A494C0T4;H0YJH6;P42226;P42226-3	0	0	0	-1	0	0	0	0	1	0	0
A0A1W2PNX8;Q9H3U1;Q9H3U1-2	0	0	0	0	0	0	0	0	0	0	0
A0A1W2PNY5;A0A1W2PPP6;A0A1W2PQA7;A0A1W2PQZ6;A0A1W2PR08;A0A1W2PRF0;A0A1W2PRF5;A0A1W2PRJ0;A0A1W2PS93;A0A1X7SBS0;G5E9D4;Q96EB1;Q96EB1-2;Q96EB1-3	0	0	-0.265016	0	0.46849	0	0	0	-0.203474	0	0
A0A1W2PP04;Q5JY83;Q9Y388	0	0	-0.344222	0	0	0	0	0	0	0	0.344222
A0A1W2PP11;Q9H300	0	0	0	0	0	0	0	0	0	0	0
A0A1W2PPB5;Q13873;Q13873-2	0.212981	0	-0.30449	0	0	-0.239979	0	0	0	0	0.331488
A0A1W2PPB7;E9PH70;H0Y8E4;Q9ULH0;Q9ULH0-2;Q9ULH0-4	0	0.105435	0	0	0	-0.262992	0	0	0	0	0.157557
A0A1W2PPC6;Q9H3H5;Q9H3H5-2	0	0	0	0	0	0	0	0	0	0	0
A0A1W2PPD8	0.388919	0	0.371899	0	-0.760818	0	0	0	0	0	0
A0A1W2PPH1;P23368	0	0	0	0	0	0	0	0	0	0	0
A0A1W2PPH6	0	0	0.760184	0	0	0	0	0	0	-0.760184	0
A0A1W2PPI5;Q5JSJ4	0	0	-0.563724	0	1	-0.436276	0	0	0	0	0
A0A1W2PPJ5;J3QT51;J3QT87;Q96SW2;Q96SW2-2
A0A1W2PPS1;Q00839;Q00839-2	0	0	0	0	0	0	0	0	0	0	0
A0A1W2PPV0;A0A1W2PQG5;Q9Y5P2;Q9Y5P2-2	0.228655	0	0	0	-0.0533542	-0.265398	0	-0.238088	0	0	0.328185
A0A1W2PPZ5;P23193	0	0	0	0	0	0	0	0	0	0	0
A0A1W2PQ75;O15488;O15488-2;O15488-3;O15488-4;O15488-6	0	0	-0.139951	0	0	0	0	0	0	0.139951	0
A0A1W2PQD2;Q9UBB4	0	0	0	0.409693	0	0	0	0	-0.409693	0	0
A0A1W2PQE7	0.387496	0	0	0	0	-0.287525	0	0	0	0.162453	-0.262424
A0A1W2PQM2	-0.60526	0	-0.39474	0	0	0	0	0	1	0	0
A0A1W2PQM3	0	0	0	0	0	0	0	0	0	0	0
A0A1W2PQM5;A0A1W2PR19;A0A1W2PRG0
A0A1W2PQP6;Q9BWL3;Q9BWL3-2;Q9BWL3-3;Q9BWL3-4;Q9BWL3-5;X6R6F3;X6R6S3	0	0.37907	-0.218095	0	0	-0.0762017	0	0	0	0	-0.0847735
A0A1W2PQQ5	0	0	0	0	0	-0.286213	0	0	0	0.186977	0.0992364
A0A1W2PQS6	0	0	0	0	0	0	0	0	0	0	0
A0A1W2PR09;A0A1W2PRL5;A0A1W2PRM0;F5GYH1;Q8NC96
A0A1W2PR17;F2Z2I2;Q16875;Q16875-2;Q16875-3;Q16875-4;Q5VX20;Q5W015	0	0	0	0	0	0	0	0	0	0	0
A0A1W2PR28;A0A1W2PRJ5;A0A6Q8PFR7;Q5JU85;Q5JU85-3	0	0	0.231641	0	-0.659847	0	0	-0.340153	0.768359	0	0
A0A1W2PR46;A0A1X7SBR3;P14136;P14136-2;P14136-3	0	0	0.308005	0	0	0	0	0	0	0	-0.308005
A0A1W2PRB8	-0.214009	0	0.0970937	0	0	0	0	0	0	0.376612	-0.259697
A0A1W2PRI9;E9PNW5	-0.305869	1	0	0	-0.694131	0	0	0	0	0	0
A0A1W2PRW4;P53816	0	0	0	0	0	0	0	0	0	0	0
A0A1W2PS05;Q8NEB9	0	0	0	0	0	0	0	0	0	0	0
A0A1W2PS43;Q14108	0	-0.525686	0	0	0	0.759751	0	0	0	0	-0.234065
A0A1W2PS52	0	0	0	0	0.376654	-0.35262	0	-0.329084	0	0.0661477	0.238902
A0A1X7SBT1;Q9H1D0;Q9H1D0-2	0.374819	0	0.625181	0	0	0	0	0	0	-1	0
A0A1X7SBY3;H0Y860;Q9P246;Q9P246-2	-0.377516	0.590177	0	0	-0.212661	0	0	0	0	0	0
A0A1X7SBZ2;A0A5H1ZRQ2;Q92841	0	-0.646639	0.250468	0	0	0.396171	0	0	0	0	0
A0A1Y0BRN3;A0A590UJ40
A0A286YEV4;A0A286YEV9;A0A286YEW8;A0A286YEX1;A0A286YF00;A0A286YF45;A0A286YF51;A0A286YF73;A0A286YFC6;A0A286YFE7;A0A286YFF5;A0A286YFH9;A0A286YFM2;B7Z2B2;E7ERQ4;Q8NHS3	0.579863	0	0	0	-0.579863	0	0	0	0	0	0
A0A286YEX4;P08651;P08651-5;P08651-6	0	0	-0.210827	0	0	0	0	0	0	0	0.210827
A0A286YF17;A0A286YFD0;P42898;P42898-2;Q5SNW7	0	0	0	0	0	0	0	0	0	0	0
A0A286YF22;O43175	0	0	0	0	0	0	0	0	0	0	0
A0A286YF37;Q9UK22	0	0	0	0.640748	0	0	0	-1	0.359252	0	0
A0A286YFA5;Q8NGQ1	0.453341	0	0	0	-1	0	0	0	0	0	0.546659
A0A286YFE3;A0A286YFF7;A0A286YFL8;A0A2C9F2P4;P50897;Q5T0S4	0	-0.441877	0	0	0	0.703071	0	0	0	0	-0.261195
A0A286YFF8;Q7Z3U7;Q7Z3U7-2;Q7Z3U7-5;Q7Z3U7-6	0	0	0	-0.316915	0	0	0	0	0.316915	0	0
A0A2Q2TTZ9;P01593;P01594	-1	0	0.736522	0	0	0	0	0.263478	0	0	0
A0A2Q3DQE3;Q13555;Q13555-10;Q13555-11;Q13555-2;Q13555-3;Q13555-4;Q13555-5;Q13555-6;Q13555-7;Q13555-8;Q13555-9;Q5SWX3;Q8WU40	0	0	-0.581567	0	1	0	0	-0.418433	0	0	0
A0A2R8Y2A8
A0A2R8Y2F6;P42336	0	0	0.396767	0	0	0	0	0	0	-0.396767	0
A0A2R8Y3M9	0.197517	-0.51785	0	0	0	0.320333	0	0	0	0	0
A0A2R8Y3N3;A0A2R8Y5P7;A0A2R8Y6I1;P49590;P49590-2	0	0	0	0	0	0	0	0	0	0	0
A0A2R8Y3S0;A0A2R8Y511;A0A2R8YCL0;Q96JX3	0	0	0	0	0	0	-0.431987	0	0	0.431987	0
A0A2R8Y440;A0A2R8Y4P4;A0A2R8Y7S2;A0A2R8YG32;A0A2R8YGG3;P51532;P51532-2;P51532-3;P51532-4;P51532-5;Q9HBD4	0	0	0	0	0	0	0	0	0	0	0
A0A2R8Y455;A0A2R8Y600;A0A2R8Y620;A0A2R8Y7U2;Q86VX2;Q86VX2-2	0	0	0	0	0	0	0	0	0	0	0
A0A2R8Y471;Q12967;Q12967-2;Q12967-3;Q12967-4;Q12967-5;Q12967-6;Q5T7U6	0	0	-0.637386	0	-0.362614	0	0	0	0	1	0
A0A2R8Y478;A6NNI4;G8JLH6;P21926	0	0	0	0	0	0	0	0	0	0	0
A0A2R8Y484;Q08722;Q08722-2;Q08722-3;Q08722-4	-1	0	0	0	0	0	0	0	0	0	1
A0A2R8Y491;E7EWD9;O95718;O95718-1;O95718-2	0	0	1	-1	0	0	0	0	0	0	0
A0A2R8Y4C2;A0A2R8Y596;A0A2R8Y5C9;A0A2R8Y5E4;A0A2R8Y6M6;A0A2R8Y8C4;A0A2R8YFK2;A0A2R8YFS8;P56945;P56945-2;P56945-3;P56945-4;P56945-5;P56945-6;P56945-7;P56945-8	0	0	0	-0.365089	0	0	0	0	0.365089	0	0
A0A2R8Y4F5	1	0	0	0	-0.421147	0	0	0	-0.578853	0	0
A0A2R8Y4I8;A0A2R8Y7K2;A0A2U3TZR0;Q9UBP0;Q9UBP0-2;Q9UBP0-3;Q9UBP0-4
A0A2R8Y4K2;Q9Y2S2	0	0	0	0	0	0	0	0	0	0	0
A0A2R8Y4M1;A0A2R8Y615;A0A2R8YGW2;A0A5F9ZHK1;Q9NZA1;Q9NZA1-2;Q9NZA1-3	0	0	0.345621	0	0	-0.394626	0	0	0	0	0.0490053
A0A2R8Y4T1	0	0	0	0	0	0	-0.420566	0	0	0	0.420566
A0A2R8Y4U1;A0A2R8YDF7;O75164	0	0	0	0	0	0	0	0	0	0	0
A0A2R8Y4U4	-0.187963	0	0.440501	0	-0.24911	-0.310907	0	0	0	0	0.307479
A0A2R8Y4V0;A0A2R8Y4Z4;A0A2R8Y5D8;A0A2R8Y6Q0;A0A2R8YDG0;Q09428;Q09428-2	0	0	0	0	0	0	0.318378	0	0	-0.318378	0
A0A2R8Y4W0	0	0	0	0	0	-0.244921	0.581596	0	0	-0.441067	0.104392
A0A2R8Y4W1;A0A2R8Y860;A0A2R8YD46;A0A2R8YFE3;A0A2U3TZS7;P43004;P43004-2	0	0.170896	0	0	0	-0.249926	0	0	0	0	0.0790307
A0A2R8Y4W2;A0A2R8YE63;Q12929	0	0	1	-1	0	0	0	0	0	0	0
A0A2R8Y4Y7;A0A2R8YFW4;Q9UQ90	0	0	0	0	0	0	0	0	0	0	0
A0A2R8Y4Z0;A0A2R8Y7W5;A0A2R8YF61;Q14004;Q14004-2	0	0	1	-1	0	0	0	0	0	0	0
A0A2R8Y4Z8	0	0	0.472751	0	0	0	0	-0.472751	0	0	0
A0A2R8Y524;A0A2R8YEC9;E9PFW2;O00462	0.209551	0.469462	0	0	0	0.320987	-1	0	0	0	0
A0A2R8Y543;A0A2R8Y5A3;A0A2R8Y804;A0A2R8YCH5;B4DGU4;P35222	0	0	0	0	0	-0.400055	0.380909	0	0	0	0.0191454
A0A2R8Y544;Q9BR61	0	0	0	0.363193	0	0	0	0	-0.363193	0	0
A0A2R8Y549;Q8NI35;Q8NI35-2;Q8NI35-3;Q8NI35-4	1	0	0	0	0	0	-1	0	0	0	0
A0A2R8Y566;Q9P260-2	0	0	0	-0.321285	0	0	0	0	0.321285	0	0
A0A2R8Y595;A0A2R8YFL0;P49711	0	0	0	0	0	0	0	0	0	0	0
A0A2R8Y5A0;A0A2R8YD58;E7EU96;P68400	0	0	0	0	0	0	0	0	0	0	0
A0A2R8Y5D3;A0A2R8YEZ4;O15160;O15160-2	0	0	0.587843	0	0	0	0	0	-0.587843	0	0
A0A2R8Y5F1;A0A2R8Y7C8;A0A2R8Y7X5;A0A2R8YDR3;A0A2R8YDZ2;A0A2R8YGD6;A0A2R8YGU4;H3BMQ0;P49815;P49815-2;P49815-3;P49815-4;P49815-5;P49815-6;P49815-7;X5D2U8	0	0	0	0	0	0	0	0	0	0	0
A0A2R8Y5J4;Q9BYG8	0.430518	0	0	0	-0.654995	0	0	0.224477	0	0	0
A0A2R8Y5K2;Q96LT7
A0A2R8Y5N2;A0A2R8Y5S3;A0A2R8YFV7;Q92574;Q92574-2	0	0	-0.204945	0	0	0	0	0.457517	0	-0.252572	0
A0A2R8Y5P9;Q8TF72
A0A2R8Y5Q8;A0A2R8YHI9;Q15813;Q15813-2	0	0	-0.41449	1	0	0	0	0	0	-0.58551	0
A0A2R8Y5Y7;D6RAN4;P32969	0	0.028398	0	0	0	0	0	0	0	-0.028398	0
A0A2R8Y605
A0A2R8Y635;A0A2R8YDN7;Q9H7F0;Q9H7F0-2
A0A2R8Y640	0	0	0.498985	0	0	0	0	-1	0	0	0.501015
A0A2R8Y648	0	0	0	0	0	0	0	0	0	0	0
A0A2R8Y653;Q9BZX2	0	0	0	0	0	0	0	0	0	0	0
A0A2R8Y661;A0A2R8YGD3;Q9Y4G8
A0A2R8Y6D0	0.237458	0	0	0	0	-0.254246	-0.285483	0	0	0	0.302272
A0A2R8Y6I6;A0A2R8Y6L5;A0A2R8YDF3;Q13627;Q13627-2;Q13627-3;Q13627-4;Q13627-5
A0A2R8Y6P2;A0A2R8YDC4;A6NFE3;C9J654;J3KR48;J3KR52	0	0	0	0	-0.492687	0	0	0.492687	0	0	0
A0A2R8Y6W8;P19447	0	0	0.029449	0	0	0	0	0	0	0	-0.029449
A0A2R8Y6Y7;A0A2R8YDQ9;Q9P2R7;Q9P2R7-2	0	0	0	0	0	0	0	0	0	0	0
A0A2R8Y783	-0.232911	0	0.435241	0	0	-0.0916766	0	0	0	0	-0.110653
A0A2R8Y7B4	0.652822	0	0.347178	0	-0.375738	0	0	0	-0.624262	0	0
A0A2R8Y7D5	0	0	0.32264	0	-0.522466	-0.477534	0	0	0	0.343367	0.333993
A0A2R8Y7E6;A0A5F9ZHX3;A0A5F9ZI57	0	0.54957	0	0	-1	0	0	0	0	0	0.45043
A0A2R8Y7I9;A0A2R8Y855;A0A2U3TZQ7;B4DGM3;J3QKS7;Q969G3;Q969G3-2;Q969G3-4;Q969G3-5	0	0	0	0	0	0	0	0	0	0	0
A0A2R8Y7P6;A0A5F9ZHW5;F8VQP2;Q99700;Q99700-4;V9GY86
A0A2R8Y7Q1;E7ETD6;E9PE19;F5GXF5;Q12830;Q12830-2;Q12830-4	0	0	0	0	0	0	0	0	0	0	0
A0A2R8Y7R4;B2RUZ4;H3BS66	0	0	0.408598	0	0	0.591402	0	-1	0	0	0
A0A2R8Y7T6;A0A3B3IRZ4;Q6DN90;Q6DN90-3
A0A2R8Y7U0;H0Y770;O75140;O75140-1;O75140-4;O75140-9
A0A2R8Y7V5;H0Y850;P38398;P38398-4;P38398-7;P38398-8;Q5YLB2
A0A2R8Y7X9;P69891;P69892	0.703991	0	-0.512074	0	0.296009	0	0	0	0	0	-0.487926
A0A2R8Y7Y4;Q8N8A2;Q8N8A2-2;Q8N8A2-4	0	0	0	-0.353274	0	0	0	0	0.353274	0	0
A0A2R8Y811;P62263	0	-0.250331	0	0	0	0	0.26038	0	0	-0.0100489	0
A0A2R8Y840;Q9HCK8;Q9HCK8-2	0	0	0	0	0	0	0	0	0	0	0
A0A2R8Y849;A0A2R8Y8A0;A0A2R8YD14;E7ETK0;P62847;P62847-2;P62847-3;P62847-4	0	0.596349	0	0	0	0	0.403651	0	0	-1	0
A0A2R8Y851;P62273;P62273-2	0	0	0	0	0	0	0	0	0	0	0
A0A2R8Y852;A0A2R8YDI1;P39880;P39880-2;P39880-3;P39880-4;P39880-5;P39880-6	0	0	0	0.748355	-0.138377	-0.339202	0	-0.270777	0	0	0
A0A2R8Y880;Q7Z6E9;Q7Z6E9-2	0	0	-0.232618	0	0	0	0	0	0	0	0.232618
A0A2R8Y8E0;A0A2U3TZI2;H7C560;P15056	0	0	0	0	0	0	0	0	0	0	0
A0A2R8YCJ8;Q5T2H3;Q9NVV5;Q9NVV5-1;Q9NVV5-3
A0A2R8YCL1;Q13322;Q13322-3;Q13322-4	0	0	1	-1	0	0	0	0	0	0	0
A0A2R8YCS7;Q9Y3Z3
A0A2R8YD30;P11171;P11171-2;P11171-3;P11171-4;Q4VB86	0	0	0	0	0	0	0	0	0	0	0
A0A2R8YD49;A0A2R8YDU7;A0A2R8YEX0;Q9H1P3;Q9H1P3-2	-0.361173	0.572186	0	0	0.087488	0	0	0	0	0	-0.298502
A0A2R8YD63;Q92547	0	0	0	0	0	0	0	0	0	0	0
A0A2R8YDB8;H7BXF5;Q9H0E3;Q9H0E3-3	0	0	0	0	0	0	0	0	0	0	0
A0A2R8YDD5;P30531	0	0.415535	0	0	0	0.273157	0	0	0	0	-0.688692
A0A2R8YDL0;O75443
A0A2R8YDQ0;Q9H267
A0A2R8YDT1;P15104	0	0	0	-0.0940742	0	0	0	0	0.0940742	0	0
A0A2R8YE10;Q9NRW7
A0A2R8YE69;P0CG41;Q8IX94	0	0	0	0	-0.614238	0	0	0	0.614238	0	0
A0A2R8YE77;A0A2U3TZM1;O14936;O14936-3	0	0	0	0	0	0	-0.0787956	0	0	0	0.0787956
A0A2R8YEA1;B5MCJ9;O15016;O15016-2	0	0	0	0	-0.579541	0	0	0	0.579541	0	0
A0A2R8YEH1	0.00576763	0	0	0.659385	0	0	0	0	-0.665152	0	0
A0A2R8YEI5;P52757;P52757-9	0	0	0	0.601846	0	0	0	0	-0.601846	0	0
A0A2R8YEL6
A0A2R8YEM2;D6RG18;D6RHI7;P51946	0	0	-0.295818	0	0	0	0	0	0	0.295818	0
A0A2R8YEM9;O15050	0	0	0	-0.0920919	0.226246	0	0	0.276841	-0.410996	0	0
A0A2R8YEZ0;B7WP89;Q0P651;Q0P651-2;Q0P651-3;Q0P651-4	0.244513	0	0	0	0	0	-0.299578	0	0	0.0550647	0
A0A2R8YF49	0	0	0	0	0	0	0	0	0	0	0
A0A2R8YF72;A0A3B3IRF0;A0A3B3IRT9;A0A3B3IRX5;A0A3B3ISI4;A0A3B3ISW5;A0A3B3ITJ8;A0A3B3ITL3;A0A3B3ITS6;A0A3B3IUE2;H7BYU4;Q9UL68;Q9UL68-4	0	0	0	0	0	-0.271052	-0.359199	0	0	0.630251	0
A0A2R8YFG2;Q96T66	0	0	0	0	0	0	0	0	0	0	0
A0A2R8YFH5;Q15437	0	0	0	0	0	0	0	0.0489256	-0.0489256	0	0
A0A2R8YFN3;A1Z1Q3;A1Z1Q3-1	0	0	0	0	0	0	0	0	0	0	0
A0A2R8YFW3;O60907;O60907-2	0	0	0.694256	-0.694256	0	0	0	0	0	0	0
A0A2R8YG42;B1ALK7;Q14155-1;Q14155-5	0	0	0	0	0	0	0	-0.000728275	0.000728275	0	0
A0A2R8YGH5;H7C1E4;P61966	0	0	0	0	-0.000817893	0	0	0.000817893	0	0	0
A0A2R8YGW0;P51795;P51795-1	0	0	0	0	-0.42367	0	0	0	0	0	0.42367
A0A2R8YHG5;Q9BZV2	0	0	0	0	0	0.514945	0	0	0	0	-0.514945
A0A2U3TZH3;Q05639
A0A2U3TZK7	0	0	0.0403978	0	0	0	0.414478	0	0	-0.768119	0.313244
A0A2U3TZL5;E9PNW4;P13987;P13987-2	0	0	0	0	0	0.524486	0	0	0	0	-0.524486
A0A2U3TZT9	0.30981	0	0	0	-0.37689	-0.233022	0	0	0	0	0.300102
A0A2U3TZU2;P06744	0	0	0	0	0	0	0	0	0	0	0
A0A2U3TZV8;Q4KWH8;Q4KWH8-2;Q4KWH8-3;Q4KWH8-4	0	0.688023	0	0	-0.20431	0	0	0	0	0	-0.483712
A0A2Y9D025;P56556;R4GN43	0	0	0	0	0	0	0	0	0	0	0
A0A384DVU0;Q8IY17;Q8IY17-2;Q8IY17-3	1	-0.63062	0	0	0	0	0	0	0	0	-0.36938
A0A3B3IRE4;Q8TCE6;Q8TCE6-2	0	0	0	0	-0.106767	0	0	0.106767	0	0	0
A0A3B3IRI9;A0A3B3IRJ3;A0A3B3IRV1;A0A3B3IRZ0;A0A3B3IS37;A0A3B3IS68;A0A3B3ISJ4;A0A3B3IT04;A0A3B3IT30;A0A3B3ITZ3;A0A3B3IU52;A6NFW1;A6NGJ7;Q9BY41;Q9BY41-4	0	0	0.410126	-1	0	0	0	0.589874	0	0	0
A0A3B3IRJ9;Q9Y2H2
A0A3B3IRK5;Q9H2D1	0	0	-0.260239	0	0	0	0	0	0	0.500615	-0.240376
A0A3B3IRL2;O75629	0	0	0	0	0	0	0	0	0	0	0
A0A3B3IRL5;C9J381;P20839;P20839-2;P20839-3;P20839-4;P20839-5;P20839-6;P20839-7	0	0	0	0	0.689512	0	0	0.310488	-1	0	0
A0A3B3IRM7	0	0	0	0	-0.511661	0	0.511661	0	0	0	0
A0A3B3IRN8;A0A3B3ITX0;P24311	0	0	0	0	0	0	0	0	0	0	0
A0A3B3IRR1;A0A3F2YNY7;P08397;P08397-2	0	0	0	0	0	0	0	0	0	0	0
A0A3B3IRS4;A0A3B3IRX3;A0A3B3IS46;H0YHC1;Q71F56	0.568708	0	0	0	-0.568708	0	0	0	0	0	0
A0A3B3IRT8;C9IZQ1;C9J3L8;C9J5W0;E9PAL7;P43307	0	0	0	0	0	0	0	0	0	0	0
A0A3B3IRU6;A0A3B3ISL2;Q9GZU2;Q9GZU2-2;Q9GZU2-4	0.234855	0	0	0	-0.593523	0	0	0	0	0	0.358668
A0A3B3IRY8	-0.667985	0.29527	0.166956	0	0	0	0	0	0	0.205759	0
A0A3B3IRZ5;Q8IYE1	0	0	0	0	0	0	0	0	0	0	0
A0A3B3IS06;E7ETY2;Q13428-3;Q13428-7;Q13428-8	0	0	0	0	0	0	0	0	0	0	0
A0A3B3IS13	0	0	0	0	-0.648503	0	0	0	0.648503	0	0
A0A3B3IS24;C9JIR6;O75688;O75688-2;O75688-4	0	0	0	0	0	0	0	0	0	0	0
A0A3B3IS40;A0A3B3ISE6;A0A3B3IT25;A0A3B3ITA8;A0A3B3ITA9;A0A3B3ITE7;A0A3B3ITJ7;B3KV94;Q9UGL1;Q9UGL1-2	-1	0	0.408158	0	0	0	0	0.299448	0	0.292394	0
A0A3B3IS62;A0A3B3ITD6;A0A3B3ITI5;Q9Y672;S4R350	0	0.472255	0	0	0	-0.382011	0	0	0	0.222763	-0.313007
A0A3B3IS71;P06400	0	0	0	0	0	0	0	0	0	0	0
A0A3B3IS75;K7EIP0;K7EJD9;K7ESF2;P13686
A0A3B3ISF0;Q659C4;Q659C4-2	0	0	0	0	0	0	0	0	0	0	0
A0A3B3ISF9;P42892;P42892-2;P42892-3;P42892-4	0	0	0	0	0	1	0	-1	0	0	0
A0A3B3ISG5;P14735	0	0	0	0	0	0	0	0	0	0	0
A0A3B3ISG8	0	0	0	0	0	0	0	0	0	0	0
A0A3B3ISH6;Q86U38;Q86U38-2	0	0	-0.00466064	0	0	-0.287106	0	0	0	0	0.291767
A0A3B3ISJ2;Q96KQ4	0	0	0.10548	0	0	0	-0.10548	0	0	0	0
A0A3B3ISK7;Q6PI48	0	0	0	0	0	0	0	0	0	0	0
A0A3B3ISP1;A0A3B3ITU5;Q92625;Q92625-2	0.334116	0	0	0	0	0	0	0.270251	-0.604368	0	0
A0A3B3ISQ4;Q9H6S3	0	0	0	0	0	0	0	0	0	0	0
A0A3B3ISR2;B4DPQ0;P00736	0	0	0	0	0	0	0	0	0	0	0
A0A3B3ISR7;E9PIF2;Q13206	0	0	0.197569	0	0	0	0	0	0	0	-0.197569
A0A3B3ISS6	0	0	-0.207417	0	0	0	0.309848	0	0	0	-0.102431
A0A3B3IST1;B5MD23;O75954	0	0	0	0	0	-0.27641	0	0	0	-0.325677	0.602087
A0A3B3ISU0;Q02487	0	0	-0.277032	0	0	0.0395458	0	0	0	0	0.237487
A0A3B3ISV3;P02462	0	0	-0.571254	0	0	0	0.272526	0	0	-0.0888757	0.387604
A0A3B3ISV4	0	0.262382	0	0	-0.541862	0	0	0	0	0	0.27948
A0A3B3ISV5;Q8N9N7
A0A3B3ISV8;A0A6Q8PF19;A0A6Q8PFS9;A0A6Q8PHH0;Q8IZF0	-0.210333	1	0	0	-0.37839	0	0	0	0	0	-0.411277
A0A3B3ISV9;O43414
A0A3B3IT21	0	0	0.175123	0	0	-0.390574	0	0	0	0.540556	-0.325106
A0A3B3IT28;A0A3B3ITE5;A0A3B3ITF7;A0A3B3ITW6;A0A3B3IU40;A0A3B3IUA1;A0A3F2YNW9;Q12756;Q12756-2;Q12756-3	1	0	0	0	0	0	0	0	0	-1	0
A0A3B3IT31;Q9NUN5;Q9NUN5-3	0	-0.428677	0	0	-0.090216	0	0	0.518893	0	0	0
A0A3B3IT92;P33991	0	0	0	0	0	0	0	0	0	0	0
A0A3B3ITH3;Q9P2X3	0	0	0	0	0	0	0	0	0	0	0
A0A3B3ITK0;P35442	0	0	0	0	0	0	0	0	0	0	0
A0A3B3ITN0;Q86TP1	0	0	0	0	0	0	0	0	0	0	0
A0A3B3ITN6;D6RBB0;O60683;O60683-2	0	0	0	0	0	0	-0.113803	0	0	0.113803	0
A0A3B3ITP4;Q495G5;Q8IVH4	0	0	0	0	0	0	0	0	0	0	0
A0A3B3ITT1
A0A3B3ITT5;P47914	0	-0.493891	0	0	0	0	0	0	0	0.493891	0
A0A3B3ITU8;A0A3B3IU04;A0A3F2YNW8;Q14643;Q14643-2;Q14643-3;Q14643-4;Q14643-5;Q14643-6;Q14643-7;Q14643-8	0	-0.0107272	0	0	0	0	0.314978	0	0	0	-0.304251
A0A3B3ITW1;P49841;P49841-2	0	0	0	0	0	0	0	0	0	0	0
A0A3B3IU42;G5EA29;H0YDP6;H0YEL0;O14893;O14893-2;O14893-3
A0A3B3IU65;A9UHW6;A9UHW6-2;A9UHW6-3;J3KSU6;J3QLD1;J3QLJ5;J3QRZ6	0	0	0	0	0	0	0	-0.205008	0.205008	0	0
A0A3B3IU69;F8W717;O00423;O00423-3	0	0	0	0	0.551285	0	0	0.448715	-1	0	0
A0A3B3IUA2;B1AHD1;P55769	0	0	0	0	0	0	0	0	0	0	0
A0A3B3IUB1;Q13144	0	0	-0.351252	0	0	0	0	0	0.351252	0	0
A0A3B3IUB5;Q8TCT9;Q8TCT9-5	0	0	0	0	0	0	0	0	0	0	0
A0A3B3IUC4;A0A6Q8PFA9;P06280	0	0	0.263787	0	0	0.447669	0	0	0	-0.711456	0
A0A3B3IUD2;Q9BUK6;Q9BUK6-2;Q9BUK6-3;Q9BUK6-7	0	0	0	-0.366497	0	0	0	0	0.366497	0	0
A0A3B3IUD4;P21453	0	0	0.261858	0	0	-0.595591	0	0	0	0	0.333733
A0A3B3IUD7;Q14690	0	0	0.346414	0	0	0	0	0	0	0	-0.346414
A0A3Q5ACI7	0	0	0	0	0.447373	0	0	0	0	0	-0.447373
A0A494BXY3;E9PLD3;E9PRG8	0	0	0.0887233	0	-0.471079	0	0	-0.278517	0	0	0.660873
A0A494BZU6;A0A494BZW7;A0A494C002;A0A494C0P9;A0A494C0Q2;A0A494C0Q6;A0A494C0W0;A0A494C156;A0A494C1K5;A0A494C1N1;O95453;O95453-2	0	0	0	0	0	0	0	0	0	0	0
A0A494BZV4;A0A494C069;Q08AG5	0	0	0	0	0	-1	0	0	0	1	0
A0A494C004;A0A494C0C5;A0A494C0D2;A0A494C0V5;A0A494C141;A0A494C1C6;A0A499FJ53;A6XNE1;F6Y2X3;Q16635;Q16635-2;Q16635-3;Q16635-4;Q16635-5;Q16635-6;Q16635-7;Q16635-8;Q16635-9	0	0	-0.389161	0	0	0	0	0	0	0.701525	-0.312364
A0A494C028;H0Y993;P35659	0	0	0	0	0	0	0	0	0	0	0
A0A494C039	-0.104379	0.392007	0	0	-0.405922	-0.281792	0	0	0	0	0.400086
A0A494C066;B7Z4W5;Q16773	0	0	0	0	0	0	0	0	0	0	0
A0A494C068;A0A494C1K7;E9PGP6;Q9UGJ0;Q9UGJ0-2;Q9UGJ0-3
A0A494C0J7;Q08188	0	0	0	0	0	0	-0.323833	0	0	0.323833	0
A0A494C0K7;A0A494C0P0;Q6P2C8;Q6P2C8-2	0	0	0.22105	0	0	0	0	0	0	0	-0.22105
A0A494C0M1;P52701	0	0	0	0	0	0	0	0	0	0	0
A0A494C0M2;O95925-3;Q9BQY6;Q9BQY6-2	0.534736	0	0	0	-0.338614	-0.308297	0	-0.353089	0.465264	0	0
A0A494C0N4;H9KV93;Q7Z4L5	0.546138	0	0	0	0.453862	-0.549221	0	-0.450779	0	0	0
A0A494C0P1;P04150;P04150-10;P04150-2;P04150-3;P04150-6;P04150-8;P04150-9	0	0	0	0	0	0	0	0	0	0	0
A0A494C0R8	0	0	0	0	0	0	0	0.0292678	-0.0292678	0	0
A0A494C0X7;D3DSM0;P05107	0	-0.0908994	0	0	0	0.0619778	0	0	0	0	0.0289216
A0A494C0Z5;Q9H082	0.664849	-0.664849	0	0	0	0	0	0	0	0	0
A0A494C105;Q9H3U5;Q9H3U5-3;Q9H3U5-5;Q9H3U5-6	0	-0.468634	0	0	0.487564	-0.266407	0	0.512436	0	0	-0.264959
A0A494C108;Q8N9T8	0	0	0	0	0	0	0	0	0	0	0
A0A494C115;A0A494C1U4;K7N7A8;P29972;P29972-2;P29972-3;P29972-4	-0.276911	0.534354	0	0	0	-0.277956	0	0	0	0	0.0205129
A0A494C143;Q14689;Q14689-6
A0A494C146;P50336	0	0	0	0	0	0	0	0	0	0	0
A0A494C164;P52630;P52630-4	0	0	0	0.336991	0	0	0	0	-0.336991	0	0
A0A494C165;K7ES25;P12955	0	0	0	0	0	0	0	0	0	0	0
A0A494C167;Q9UHD2	0	0	0	-0.385621	0	0	0	0	0.385621	0	0
A0A494C193;Q08E93	0	0	0	0	0	0	0	0	0	-1	1
A0A494C1F2;P35658;P35658-2;P35658-3;P35658-4;P35658-5	0	0	-0.497008	0	0	0	0	0	0	0.497008	0
A0A494C1J1;Q69YQ0;Q69YQ0-2	0	0	-0.0124731	0	0	-0.271285	0	0	0	0.324429	-0.0406702
A0A494C1J8	-0.49938	0	-0.50062	0	0	0	0	0	0	0.56134	0.43866
A0A494C1L5;P50851-2	0	0	0	-0.0232659	0	0	0	0	0.0232659	0	0
A0A494C1M4;Q3SY69
A0A494C1N0;P26885	0	0	0	0	0	0	0	0	0	0	0
A0A494C1S7;Q9Y5Q9	0	0	0	0	0	0	0	0	0	0	0
A0A494C1T9;Q6ZRV2	0	0	0.0447903	0	0	0	0.512084	0	0	0	-0.556874
A0A494C1V1;Q6ZNJ1;Q6ZNJ1-2;Q6ZNJ1-3	0	0	0	-1	0.577509	0	0	0.422491	0	0	0
A0A499FI31;Q15020;Q15020-4	0	0	-0.073879	0	0	0	0	0	0.073879	0	0
A0A499FI48;P13667	0	0	0	0	0	0	0	0	0	0	0
A0A499FIS5;A0A499FJN1;A0A499FJS1;Q9BUB5;Q9BUB5-2;Q9BUB5-3	1	0	0	-0.592801	0	0	0	0	-0.407199	0	0
A0A499FIX8;A0FGR8-2;H7BXI1	0	0	0	0	0	0	0	0	0	0	0
A0A499FIY8;C9JC07;C9JZL8;Q96S97	0	0	0	0	0	-0.369071	0	0	0	0	0.369071
A0A499FIZ0	0	0	0	0	0	0	0	0	0	0	0
A0A499FJI4;O75592;O75592-2
A0A499FJM4;P08684	0	0.326545	0	0	-0.326545	0	0	0	0	0	0
A0A539;A0A589	-0.665216	0	1	0	0	0	0	0	0	-0.334784	0
A0A590PXD8;Q53SF7-3
A0A590UIU4;A0A590UJ09;A0A590UJ61;A0A590UJC8;A0A590UJF4;A0A590UJG1;A0A590UJH1;A0A590UJS0;A0A590UJT1;A0A590UK11;A0A590UK42;A0A590UK98;Q5VZ66	-0.454656	0	0	0	0	0	0.454656	0	0	0	0
A0A590UJ36;A6NDB9
A0A590UJ43;P48729;P48729-3;U3KPX3	0	0	0	0	0	0	0	0	0	0	0
A0A590UJ46	0	0	0	0	-0.0464429	0	0	0.520195	0	0	-0.473752
A0A590UJ50;A0A590UJR3;Q13616	0	0	0	-0.555511	0	0	0	0	0.555511	0	0
A0A590UJ62;E7ETH1;Q14003	-0.510717	0	0.224341	0	-0.489283	0	0	0	0.775659	0	0
A0A590UJ68;A0A590UJR5;A0A590UJS9;A0A590UKA8;Q12959;Q12959-3;Q12959-5;Q12959-6;Q12959-7	0	0	0	0	0	-0.255554	0.0972429	0	0	0	0.158311
A0A590UJ73;A0A590UJW4;E7EQB3;Q9BSV6	0	0	0	-1	0.308241	0	0	0	0.691759	0	0
A0A590UJA9;C9JCW7;C9JE12;Q9BVT8	0	0	0	0	0	0	0	0	0	0	0
A0A590UJB6	0.174321	0	0	0	-0.465862	-0.534138	0.288616	0	0	0.252401	0.284661
A0A590UJC7;A0A590UK51;O60733;O60733-2
A0A590UJF0;P63092-3	0.255312	-0.582817	0	0	0	0.355069	0	0	0	0	-0.0275641
A0A590UJG2;Q9UPN3-2;Q9UPN3-3
A0A590UJK3;Q14BN4;Q14BN4-2;Q14BN4-3	0	-1	0	0	0	0	0	0	0	0	1
A0A590UJK4;A0A590UJP7;A0A590UK01;A0A590UK80;Q13247;Q13247-3	0	0	-0.339404	0	0	0	0	0	0	0.339404	0
A0A590UJL0;P08842	-1	0	0	1	0	0	0	0	0	0	0
A0A590UJN0;E7ETK1;E9PBA8;Q52LR7;Q9H2F5;Q9H2F5-2	0	0	0	0	0	0	0	0	0	0	0
A0A590UJS8;A0A5F9ZA98;B4DGL8;O75027;O75027-2	0	0	0	0	0	0	0	0	0	0	0
A0A590UJW0;A0A590UKC9;P20585	0	0	0	0	0	0	0	0	0	0	0
A0A590UJW8;Q96J02;Q96J02-2
A0A590UJY5	-0.243462	0	0	-0.224706	0.22474	0	0	0.243429	0	0	0
A0A590UK09;A0A590UK73;B1AKN5;B1AKN7;B1AKN8;Q12857;Q12857-2;Q12857-4	0	0	0	0	0	0	0	0	0	0	0
A0A590UK87	0.500195	0	0	0	0	0	0	0	-0.500195	0	0
A0A590UKC3;Q9UF12	0	0	0	0	0	0	0	0	0	0	0
A0A5E8;Q99501;Q99501-2;Q99501-3;Q99501-4	0.554901	0	0.445099	0	0	0	-0.567711	0	0	-0.432289	0
A0A5F9UK94;H0Y360;Q01433;Q01433-2	0	0	0	0.00212302	0	0	0	0	-0.00212302	0	0
A0A5F9UP49;Q9BRK5	0	0	0	0	-0.355631	0	0	0.355631	0	0	0
A0A5F9UY30;A0A5H1ZRP2;O43493;O43493-3;O43493-5;O43493-7	0	-0.528756	0	0	0.0771256	0	0	0.45163	0	0	0
A0A5F9YFS9;C9JBL1;Q9Y6A9	0	0	0	0	0	0	0	0	0	0	0
A0A5F9YLF9	-1	0	0.674716	0	0.325284	0	0	0	0	0	0
A0A5F9ZGN6	0	0.461368	0	0	0	-1	0	0	0	0	0.538632
A0A5F9ZGW5;C9J8U3;Q7Z2E3-13;Q7Z2E3-5;Q7Z2E3-7;Q7Z2E3-9	0	-1	0.576168	0	0	0	0	0	0	0	0.423832
A0A5F9ZGX0	0	0	0	0	0.687129	-0.550162	0	0.312871	0	0	-0.449838
A0A5F9ZGX3;A0A5F9ZGY3;A0A5F9ZGY4;A0A5F9ZGZ5;A0A5F9ZH19;A0A5F9ZH30;A0A5F9ZHD2;A0A5F9ZHE4;A0A5F9ZHN5;A0A5F9ZHR8;A0A5F9ZHS1;A0A5F9ZI30;A0A5F9ZI40;A0A5F9ZI65;D6RHE1;I6L894;Q01484	0	0	-1	0	0	0	0	0	0	1	0
A0A5F9ZGY7	0	0	0	0	0	0	0	0	0	0	0
A0A5F9ZH20;A0A5F9ZH60;A0A5F9ZH84;Q5TF39
A0A5F9ZH93;A0A5F9ZHX9;Q9UHN1	0	0	0	0	0	0	0.29312	0	0	-0.29312	0
A0A5F9ZHE0;C9JQD1;P35557	0	0	0	0	0	0	0	0	0	0	0
A0A5F9ZHH6;P19793;P19793-2	0	0	0	0	0	0	0	0	0	0	0
A0A5F9ZHJ0	0	0	0	0	0	0	0	0	0	0	0
A0A5F9ZHM4;P07195	0	0	0	0	0	0	0	0	0	0	0
A0A5F9ZHN2;E7EWD6;Q76L83;Q76L83-2	0	0	0	0	0	0	0	0	0	0	0
A0A5F9ZHN7;Q9NTJ5	0	0	0	0	0	0	0	0	0	0	0
A0A5F9ZHN9;P51648;P51648-2	0	0	0	0	0	0	0	0	0	0	0
A0A5F9ZHP1;Q8N9N2-2
A0A5F9ZHX8;A0A5F9ZHZ5;F5GYY5;F5H324;P51690	0	0	0	0	0	0	0	0	0	0	0
A0A5F9ZI21;Q92974;Q92974-2;Q92974-3;V9GYF0;V9GYM8	0	0	0.339974	0	0.660026	0	0	0	0	0	-1
A0A5F9ZI33	0	0.393557	0	0	0	0	0	0	0	0	-0.393557
A0A5F9ZI76;Q32ZL2;Q32ZL2-2	0	0	0	0	0.393697	-0.101374	0	0.256333	0	-0.548656	0
A0A5H1ZRP4;Q8WX92;Q8WX92-2	0	0	0	0	0	0	0	0	0	0	0
A0A5H1ZRR2;G9CGD6;G9CGD6-2;G9CGD6-3;Q6P9H4
A0A5H1ZRS1
A0A5K1VW60;Q99766	0	0	0	0	0	0	0	0	0	0	0
A0A5K1VW66;P35240;P35240-2;P35240-3;P35240-4;P35240-5;P35240-6;P35240-8	-0.426068	0.514591	0	0	0	0	0	0	0	0	-0.0885225
A0A5K1VW95;P40925;P40925-3	0	0	0	0	0	0	0	0	0	0	0
A0A669KA36;A0A669KB88;B7ZLR4;E7ET55;F5H748;P35670;P35670-2;P35670-4	0	0	0	0	0	0	0	0	0	0	0
A0A669KAV7;A0A669KBH9;M0QXA7;O95785-3	0	0	-0.335335	0	0	0	0	0	0	0	0.335335
A0A669KAW1;G3XAD2;Q9BYC5;Q9BYC5-2;Q9BYC5-3	0	0	0	0	0	0	0	0	0	0	0
A0A669KAX3;O76024	1	-1	0	0	0	0	0	0	0	0	0
A0A669KAX4;K4DI93;Q13620;Q13620-1;Q13620-3	0	0	0	0.385781	0	0	0	0	-0.385781	0	0
A0A669KAX9;Q5T653	0	0	0	0	0	0	0	0	0	0	0
A0A669KAY5;A0A669KB27;A0A669KBH7;C9JTE9;Q9UHQ4;Q9UHQ4-2	0	0.601884	0	0	-0.344936	0	0	-0.256948	0	0	0
A0A669KB10;A0A669KBG8;Q92538;Q92538-2;Q92538-3	0	0	0	0	0.0183486	0	0	-0.0183486	0	0	0
A0A669KB12;Q09472	0	0	0	0	0	0	0	0	0	0	0
A0A669KB29;K7EQ21;K7EQZ1;Q9P0U4;Q9P0U4-2
A0A669KB41;A0A669KBH5;D6RA31;E7EPV7;P37840;P37840-2;Q16143	0	0	0.171723	-0.446291	0	0	0	0.274568	0	0	0
A0A669KB53;A0A669KB56;A0A669KB68;A0A669KBA4;A0A669KBI6;J3KPM9;P42224;P42224-2	0	0	0	0	0	0	0	0	0	0	0
A0A669KB69;Q6Q788
A0A669KB71;O94842;O94842-2;O94842-3	0	0	1	0	0	0	0	-1	0	0	0
A0A669KB81	0.618176	0	0	0	-1	0	0	0.381824	0	0	0
A0A669KBE6;A0A669KBF5;Q9NV96;Q9NV96-2;Q9NV96-3	0	-0.0602749	0	0	0	0	0	0	0	0	0.0602749
A0A669KBF4;O00327;O00327-1;O00327-6;O00327-7;O00327-8;O00327-9	0	0	0	0	0	0	0	0	0	0	0
A0A669KBG1	0.00448773	0	0	0	-0.00448773	0	0	0	0	0	0
A0A669KBH1	0	0	0	0	-0.732099	0	1	-0.267901	0	0	0
A0A669KBH4;Q14999;Q14999-2	0	0	-0.238473	0	0	0	0	0.239521	-0.0010482	0	0
A0A669KBJ1;Q9P202;Q9P202-3;Q9P202-4	0	0	0	0	0	0	0	0	0	0	0
A0A669KBJ4;E7ERL6;Q6P0Q8;Q6P0Q8-2	-0.501135	0	0.501135	0	0	0	0	0	0	0	0
A0A669KBJ7;Q9H2P0	0	0	-0.256503	0	0	0	0	0	0	0.256503	0
A0A669KBL1;Q93009;Q93009-3
A0A6E1WB48;Q14541;Q14541-2	0	0	0	0	-0.597981	0	0.596772	0.403228	0	-0.402019	0
A0A6I8PIT3;A0A6I8PIV1;Q9P2J5	0	0	0	0	0	0	0	0	0	0	0
A0A6I8PRM6;B1ALU3;O95490-2;O95490-5	0	0	0	0	0	-0.467258	0.349086	0	0	0	0.118172
A0A6I8PS32;Q99615	0	0	0	0	0	0	0	0	0	0	0
A0A6I8PTZ8;Q9UL18	0	-0.527535	0	0	0	0	0.282143	0	0	0.245392	0
A0A6I8PU65;Q9NUD9	0.331258	0	0	0	-0.774035	0	0	0	0	0	0.442778
A0A6Q8JGF9;I3L1H5;I3L3X9;Q9BZG8;Q9BZG8-2;Q9BZG8-3	0	0	0	0	0	0	0	0	0	0	0
A0A6Q8KRG2;Q08379	0	0	0	0	0.0262203	0	0	-0.0262203	0	0	0
A0A6Q8PEX6;A0A6Q8PFB7;A0A6Q8PG86;A0A6Q8PHF4;O95163	0	0	0	0	0	0	0	0	0	0	0
A0A6Q8PEY3;A0A6Q8PGV6;I3L3G9;I3L522;Q9NXR1;Q9NXR1-1	-0.478422	0	0	0	0.478422	0	0	0	0	0	0
A0A6Q8PEZ4;A0A6Q8PFG4;A0A6Q8PGL3;A0A6Q8PGS2;A0A6Q8PGU0;A0A6Q8PH79;B4DIH2;Q8TB36;Q8TB36-2	0	0	-0.416809	0	0	0	0	0	0	0.416809	0
A0A6Q8PEZ7;A0A6Q8PG30;A0A6Q8PHQ1;Q96S66	0	0	0	0	0	0	0	0	0	0	0
A0A6Q8PF03	0	0	0	-1	0	0	0	0	1	0	0
A0A6Q8PF05;B4DHE8;J3KTC1;Q96DH6;Q96DH6-2
A0A6Q8PF14	0	0	0	0	-0.545609	0	0	0	0	0.545609	0
A0A6Q8PF33;A0A6Q8PGE8;A0A6Q8PGN5;H3BPK7;P49588	0	0	0	0	0	0	0	0	0	0	0
A0A6Q8PF40;A0A6Q8PFC4;A0A6Q8PFY7;A0A6Q8PG00;A0A6Q8PG04;A0A6Q8PGS4;A0A6Q8PH27;A0A6Q8PH89;Q92734;Q92734-2;Q92734-3;Q92734-4	0	0	0	0	0	0	0	0	0	0	0
A0A6Q8PF44;A0A6Q8PH71;A0A6Q8PHA2;A0A6Q8PHG2;Q27J81;Q27J81-2
A0A6Q8PF62;A0A6Q8PF70;A0A6Q8PF86;A0A6Q8PFJ3;A0A6Q8PG59;A0A6Q8PGB4;A0A6Q8PGP4;A0A6Q8PGY4;A0A6Q8PGY7;A0A6Q8PHA1;A0A6Q8PHC7;A0A6Q8PHH5;A0A6Q8PHK3;A0A6Q8PHP5;Q92562
A0A6Q8PF83;A0A6Q8PGD1;A0A6Q8PH95;D6REX9;Q8N960;Q8N960-2	0	0	0	0	0	0	0	0	0	0	0
A0A6Q8PF94;O15344	0	0	0	0	0	0	0	0	0	0	0
A0A6Q8PFA4;A0A6Q8PFD4;A0A6Q8PFI6;A0A6Q8PFL5;A0A6Q8PFT9;A0A6Q8PFW1;A0A6Q8PG02;A0A6Q8PG22;A0A6Q8PGB2;A0A6Q8PGF7;A0A6Q8PGH6;A0A6Q8PGT8;A0A6Q8PGW1;A0A6Q8PGY0;A0A6Q8PH15;A0A6Q8PH70;A0A6Q8PH85;Q6UWE0;Q6UWE0-2	0	0	0	0	0	0	0	0	0	0	0
A0A6Q8PFA6;A0A6Q8PG37;A0A6Q8PGH7;A0A6Q8PH57;O00139;O00139-1;O00139-2;O00139-4;O00139-5	0	0	0	0	0	0	0	0	0	0	0
A0A6Q8PFE6;Q9UKA9;Q9UKA9-2;Q9UKA9-3;Q9UKA9-4	0	0	-0.338302	0	0	0	0	0	0	0.338302	0
A0A6Q8PFG0;A0A6Q8PGT4;A0A6Q8PH04;A0A6Q8PHN3;A0A6Q8PHP9;Q9P212;Q9P212-2
A0A6Q8PFI8;P11166	0	0	0	0	0.332139	0.335667	0	-0.667807	0	0	0
A0A6Q8PFJ0;P02545	0	0	0	0	0	0	0	0	0	0	0
A0A6Q8PFJ4;A0A6Q8PGV8;O95140	0	0	0	0	0	0	0	0	0	0	0
A0A6Q8PFK4;P50747	0	0	0	0	0	0	0	0	0	0	0
A0A6Q8PFM5;O95831;O95831-3	0	0	0	0	0	0	0	0	0	0	0
A0A6Q8PFU3;P43034	0	0	0	0.0382413	0	0	0	0	-0.0382413	0	0
A0A6Q8PG52;A0A6Q8PH84;P51149	0	0	0	0	0	0	0	0	0	0	0
A0A6Q8PG54;G3XAG5;P51793;P51793-2	0	0.612123	0	0	-0.612123	0	0	0	0	0	0
A0A6Q8PG85;Q9HD42	0	0	0	0	0	0	0	0	0	0	0
A0A6Q8PGA8;A0A6Q8PGI6;A0A6Q8PGZ8;A0A6Q8PHH9;P41250	0	0	0	0	0	0	0	0	0	0	0
A0A6Q8PGB0;P24928	0	0	0	0	0	0	0	0	0	0	0
A0A6Q8PGM6;Q9UJY1	0	0	1	0	-1	0	0	0	0	0	0
A0A6Q8PGS5;A0A6Q8PHS7;C9JEX3;Q13614;Q13614-2
A0A6Q8PGU6;Q8NB90
A0A6Q8PH13;A0A6Q8PH87;Q86WG5;Q86WG5-3	0.644794	0	0	0	0	0	0	0	0	0	-0.644794
A0A6Q8PHA5;E7ETE2;P12081;P12081-4	0	0	0	0.314092	0	0	0	0	-0.314092	0	0
A0A6Q8PHC6;P50440	0	0	0	0	0	0	0	0	0	0	0
A0A6Q8PHH2;O95251;O95251-2;O95251-4	0	0	0.353595	0	-0.353595	0	0	0	0	0	0
A0A6Q8PHK0;Q14669-2	0	0	0	0	0	0	0	0	0	0	0
A0A6Q8PHP0;P49902;P49902-2	0	0	0	-0.393017	0	0	0	0	0.393017	0	0
A0AV96-2	0	0	-1	0	0	0	1	0	0	0	0
A0AVL1;F8WC54;Q13443;Q13443-2	0.302316	0	0.697684	0	0	0	0	0	0	-1	0
A0AVT1	0	0	0	0	0	0	0	0	0	0	0
A0MZ66	0	0	0	0	0	0	0	0	0	0	0
A0PJW6	0	0	0	0	0	0	0	0	0	0	0
A0PJX8	0.230185	-0.0453326	0	0	-0.184852	0	0	0	0	0	0
A0PJZ3;C9JND4	0.252577	0	0	0	-0.605203	-0.394797	0	0.437836	0	0	0.309587
A0RZB6	-0.697585	0	0	0	0	0	0	0.256555	0.44103	0	0
A1A4S6;H0Y8W5	0	0	0.0672973	0	0	-0.261357	0	0	0	0.438956	-0.244896
A1A519;A1A519-2;A1A519-3;D6RIE9
A1A5C7;A1A5C7-2;A1A5C7-3;C9J4Z0	-0.223603	0	-0.29924	0	0	0.334168	0	0	0	0	0.188675
A1IGU5
A1L0T0	-0.24278	0.24278	0	0	0	0	0	0	0	0	0
A1L188
A1L390;A1L390-3	-1	0	0	1	0	0	0	0	0	0	0
A1X283	0	0	0	0	0	0	0	0	0	0	0
A2A274;Q99798	0	0	0	0	0	0	0	0	0	0	0
A2A2L4;Q5JX74;Q9NUS5
A2A2N0;O60676	0	0	1	0	0	0	0	0	0	-1	0
A2A2Q9;Q9Y312	0	0	0	0	0	0	0	0	0	0	0
A2A2V1;P04156	-0.0148285	0	0	0	-0.579492	0	0	0	0	0	0.59432
A2A2V2;P42696;P42696-2;Q5TCT4	0	0	0	0	0	0	0	0	0	0	0
A2A369;Q8NF50;Q8NF50-2;Q8NF50-3;Q8NF50-4	0	-0.388878	0	0	0	0	0	0	0	0	0.388878
A2A3G7	0	0	0	0	-0.328999	0	0	0.328999	0	0	0
A2IDC6;Q13084	0	0	0	0	0	0	0	0	0	0	0
A2RRP1	0.0390672	-0.0390672	0	0	0	0	0	0	0	0	0
A2RTX5;B7ZLP8
A2RU37	0	0	0	0	-0.0972337	0	0	0.0972337	0	0	0
A2RU49	0	0	0.204862	-0.204862	0	0	0	0	0	0	0
A2RUC4	0	0	0	-0.319473	0	0	0	0	0.319473	0	0
A2RUS2;A2RUS2-2;A2RUS2-4;E5RHH2;E5RI43;E5RIR7;E5RJ42;E9PF32;H0YAY3	0	0	0	0	0	0	0	0	0	0	0
A2VDF0	0	0	0	0	0	0	0	0	0	0	0
A2VDJ0;A2VDJ0-3;A2VDJ0-5	0.0316942	0	0	-0.0316942	0	0	0	0	0	0	0
A3KFL2;Q13868;Q13868-2;Q13868-3	0	0	-0.569794	0	0	0	0	0	0.569794	0	0
A3KMH1;A3KMH1-3	0	0	0	0	0	0	0	0	0	0	0
A3KN83;A3KN83-2;A3KN83-3	0	0	-0.0327358	-0.685328	0	0	0	0	0.718063	0	0
A4D1E9	0	0	0.172611	0	0	0	0	0	0	-0.172611	0
A4D1P6
A4D1U4;C9J7X6
A4D2B0	0	0	0	0	0	0	0	0	0	0	0
A5D8V6;F5H4Q5	0	0	0	-1	0.421413	0	0	0	0.578587	0	0
A5D8V7;A5D8V7-2;K7EN59;K7EPK8	0	0	0	0	0	0	0	0	0	0	0
A5PLN9;A5PLN9-2;A5PLN9-4;A5PLN9-5	0	0	0	0	0	0	0	-0.650064	0.650064	0	0
A5YKK6;A5YKK6-2
A6NC78	0	0	0	0	0	0	0	0	0	0	0
A6NCC9;C9JHT9;C9JJV1;E9PME3;Q9Y5U2;Q9Y5U2-2	-0.179916	0	0	0.179916	0	0	0	0	0	0	0
A6NCE7;H3BTL1;Q9GZQ8	0	0	0	0	0.510496	0	0	-0.510496	0	0	0
A6NCS6	0	0	0	0	0	-0.451113	0	0	0	0	0.451113
A6ND36
A6ND91	0	0	0	0	0	0	0	0	0	0	0
A6NDG6	0	0	0	0	0	0	0	0	0	0	0
A6NDL8	0	0	0	0	0	0	0	0	-1	1	0
A6NDR6	0.618591	0	0	0	-1	0	0	0	0	0	0.381409
A6NDU8	0	0	0	-1	0.297269	0	0	0	0.702731	0	0
A6NE01;F5GYN0;F5H8C1	0	0	0	0	-0.0624249	0	0	-0.441121	0	0	0.503546
A6NED2;G3V2I3	0.272073	0	0	-1	0	0	0	0	0.727927	0	0
A6NEE1
A6NEL0;A6NL93;P05114	0	0	0	0	0	0	0	0	0	0	0
A6NEL2	0	0	-0.166549	0	0	0	0	0	0	0	0.166549
A6NEM2;P51610;P51610-2;P51610-4	0	0	0	0	0	0	0	0	0	0	0
A6NEY8	0	0	0	0	0	0	0	0	0	0	0
A6NF36	0	0	0	0	0	0	0	0	0	0	0
A6NFQ9;F8W8I8	0	0	-1	0	0.487712	0	0.512288	0	0	0	0
A6NFS0;Q9NSD4;Q9NSD4-2	-0.525103	0	0.174568	0	0	0	0	0	0	0	0.350534
A6NFV8;D6RCT8	0	0	0	0	-0.523674	0	0	0	0	0.523674	0
A6NFX8;Q9UKK9	0	0	0	0	0	0	0	0	0	0	0
A6NFY7	0	0	0	0	0	0	0	0	0	0	0
A6NG10;K7EIJ0;K7EMC9;K7ENL2;Q969T9	0	0	0	0	0	0	0	0	0	0	0
A6NGA6;Q5H9D4;Q9Y5S8;Q9Y5S8-2;Q9Y5S8-3	0	0	0	0	0	0	0	0	0	0	0
A6NGJ0;P51808
A6NGL4;P0CW00	-0.486559	0	0	0	0.394396	-0.513441	0	0.605604	0	0	0
A6NGQ3;Q5VST9;Q5VST9-2;Q5VST9-6	0	0.45048	0	0	0	0	-0.45048	0	0	0	0
A6NGU5;B5MCK8;P19440	0	0	0	0	0	0.0243941	0	0	0	0	-0.0243941
A6NGW1;O95070	0	-0.398625	0	0	-0.00874769	0	0	0.407373	0	0	0
A6NH11	0	0	0	0	-0.0239676	0	0	0.0239676	0	0	0
A6NHG8;Q13114	0	-1	0	0	0	0	0	0	0	0	1
A6NHJ8;A6NND8;C9JAL0;C9K0F7;H7C3I5;O95825;O95825-2
A6NHR9;A6NHR9-2	0.079505	0	-0.079505	0	0	0	0	0	0	0	0
A6NI28;E9PJK4	0	0	-0.405612	0	0	0.347386	0	0	0	0	0.058226
A6NI72;A8MVU1;C9J155;P14598;P14598-2	0	0	0	0	1	0	0	-1	0	0	0
A6NIH7	0	0	0	0	0	0	0	0	0	0	0
A6NIT2;A6NMN0;P46020;P46020-2;P46020-3	0	0	0	0.0932696	0	0	0	0	-0.0932696	0	0
A6NIV6	-1	0	0	0	0.668952	0	0	0	0	0	0.331048
A6NIZ0;Q9GZM8;Q9GZM8-2;Q9GZM8-3
A6NJA2;P54578;P54578-2;P54578-3	0	0	0	0	0	0	0	0	0	0	0
A6NK44;H7C348	0	0	0	0	0	0	0	0	0	1	-1
A6NKD9	0	0	0.721623	0	0	-0.344278	0	0	0	0	-0.377346
A6NKN8	0	0	0	0	0	0	0	0	0	0	0
A6NKZ2;P51606	0	0	0	-1	0	0	0	0	1	0	0
A6NLH6;Q9P003	0	0	0	0	0	0	0	0	0	0	0
A6NLN1;P26599;P26599-2;P26599-3	0	0	-0.258527	0	0	0	0	0	0	0	0.258527
A6NLP5	0	0	0	0	0	0	0	0	0	0	0
A6NMH6;Q92599;Q92599-2;Q92599-4	0	0	-1	0	0	0	1	0	0	0	0
A6NML8;C9J6U3;O60879-2	0	0	0	0.392755	0	0	0	0	-0.392755	0	0
A6NMQ3;O43768;O43768-2;O43768-3;O43768-4;O43768-9;Q5T5H1	0	0	0	0	0	0	0	0	0	0	0
A6NMV7	-1	0	0	0	0	0	0	0	1	0	0
A6NMZ5	-0.364813	0	0.534156	0	0	0	0	0	0	0	-0.169343
A6NMZ7;A6NMZ7-2	0	0	-0.307734	0	0	0	0	0	0	0	0.307734
A6NN50;O75147;O75147-1;O75147-2;O75147-4	0	0	0	0	0.197625	0	0	0.19779	-0.395415	0	0
A6NNK5;Q12888;Q12888-2;Q12888-3	-0.304685	0	0.304685	0	0	0	0	0	0	0	0
A6NP16;E7ERM3;Q4VCS5;Q4VCS5-2	0	0	-0.74942	0	0	0.34664	0	0	0	0	0.402781
A6NP52;O60831	0	0	0	0	0	0	0	0	0	0	0
A6PVD3;P48436;P56693;P56693-2;P57073	-0.277281	0	0	0	0.277281	0	0	0	0	0	0
A6PVK5
A6PVU8;Q6UWW7;Q9NNX1;Q9NNX1-2;Q9NNX1-3
A6PVY1;A6PVY2;A6PVY3;A6PVY3-2	0.54207	0	0	-1	0.45793	0	0	0	0	0	0
A6PW57;Q99755;Q99755-3;Q99755-4	0.0315667	0	0	0	0	-0.415941	0.399934	0	0	0	-0.0155599
A6PWM2;Q6UXH1;Q6UXH1-2;Q6UXH1-3;Q6UXH1-4;Q6UXH1-5;Q6UXH1-6	0	-0.296329	0	0	0	0.296329	0	0	0	0	0
A6XND0;A6XND1;B3KWK7;C9JMX4;H0Y5K2;P17936;P17936-2	0	0.035805	0	0	0	0.367871	0	0	0	0	-0.403676
A7E2V4;A7E2V4-3;A7E2V4-4;A7E2V4-5;S4R393;S4R410	0	0	0	0	-0.410461	0	0	0.131351	0.279109	0	0
A7KAX9;A7KAX9-2
A7MCY6
A7XZE4;Q3SX28	0	0	-0.273143	0	0	-0.412717	0	0.68586	0	0	0
A8CG34;A8CG34-2	0	0	0	0	0	0	0	0	0	0	0
A8DPD7;Q9C0D3	0	0	0	0	0	0	0	1	0	0	-1
A8MPP7;A8MPY5;E7ETV6;Q9UPE1;Q9UPE1-2;Q9UPE1-3;Q9UPE1-4	0.642741	0	0	0	-0.642741	0	0	0	0	0	0
A8MQ02	0	0	-0.760267	0	0	0.245851	0.225689	0	0	0	0.288727
A8MQB8;G3V0J0;Q06787-2	-0.585766	0.464943	0	0	0.289291	-0.414234	0	0	0	0	0.245766
A8MSI8;D6RAR2;D6RFL2;J3KTA2	0	0	0.318481	0	0	0	0	0	0	-0.0273975	-0.291084
A8MSY1;C9JYJ2;Q8IVN3	0.135005	0	0	-0.589819	0.454815	0	0	0	0	0	0
A8MT69;A8MT69-2;A8MT69-3;J3QR01;J3QRS1	-0.712247	0	0.448996	0	0	0	0	0	0	-0.0809994	0.344251
A8MTT3	0	0	0	0	0	0	0	0	0	-0.255667	0.255667
A8MUM1;Q53HC9
A8MVV6;E9PN41;E9PPX8;E9PSH3;J3KQ42;O14817	0	0.501786	0	0	0	0	0	0	0	0	-0.501786
A8MVZ6;Q96G01;Q96G01-3;Q96G01-4	1	0	0	0	-1	0	0	0	0	0	0
A8MWD9;F5H013;P62308;Q49AN9	0	0	0	0	0	0	0	0	0	0	0
A8MXB7	0	0	0	-0.0265557	0	0	0	0	0.0265557	0	0
A8MXV4	0	0	0	0	0	0	-0.429218	0	0	0.429218	0
A8MYA3;J3KQ25;Q8N6M9
A8MYZ0	0.0218995	0	0.618025	0	0	0	0	0	0	-0.639925	0
A8TX70;A8TX70-2;E9PAL5	0	0.61034	-1	0	0	0	0	0	0	0	0.38966
A9X3U0;Q96GF1
A9Z1X7;E9PCT1;Q8IYB3;Q8IYB3-2	0	0	0	0	0	0	0	0	0	0	0
B0QY89;Q9Y262	0	0	0	0	0	0	0	0.0294758	-0.0294758	0	0
B0QY95;Q9NQG6	-0.479439	0	0	0	0	0	-0.111534	0	0	0.326851	0.264122
B0QYF8;P02144	-1	0	0	0	0.363817	0	0	0	0.636183	0	0
B0QYK0;Q01844;Q01844-3;Q01844-5;Q01844-6
B0QYN7;H3BQQ9;P63279	0	0	0	0	0	0	0	0	0	0	0
B0QYP2;O95931	0	0	0.176929	0	0	-0.262742	0	0	0	0	0.0858134
B0QYW5;F6RTR7;O43808	0	0	0	0	0	0	-0.47616	0	0	0.21576	0.2604
B0QZ18;F2Z2V0;Q99829	0	0	0	0	0	0	0	0	0	0	0
B0QZA9;Q6QHF9;Q6QHF9-4	-0.445504	0	0	0	1	0	0	0	0	-0.554496	0
B0YIW2;P02656	0	0	-0.526309	0	0	1	0	0	0	0	-0.473691
B1AH87;P30536	0	0	0	0	0	0	-0.377415	0	0	0.377415	0
B1AHA8;P09601	0	-0.331884	0	0	0	0.331884	0	0	0	0	0
B1AHB1	1	0	0	0	0	0	0	0	-1	0	0
B1AHL2;P23142;P23142-2;P23142-3;P23142-4	0	0	0	0	0	0	0	0	0	0	0
B1AHR2	0.0152774	0	0	-0.0152774	0	0	0	0	0	0	0
B1AJQ6;Q86Y82	0	0	0	0	-1	1	0	0	0	0	0
B1AJS1;O14525;O14525-2;O14525-3	0	0	0.615166	0	0	0	0	0	0	-0.143167	-0.472
B1AK53
B1AK61;Q5VTY9;Q5VTY9-2;Q5VTY9-3;Q5VTY9-5;Q5VTY9-6;Q5VTY9-7	0.297121	0	0	0	-0.560661	0	0.388953	-0.125412	0	0	0
B1AK88;P47756-2
B1AKC9;P29323;P29323-2;P29323-3	0	0	0	1	-0.378977	0	0	-0.245071	-0.375951	0	0
B1AKG0;Q03591	-0.185809	0.642024	0	0	-0.442332	-0.0138834	0	0	0	0	0
B1AKI6;Q9NUK0;Q9NUK0-2	0	0	0	1	0	0	0	0	-1	0	0
B1AKL4;Q9NRA8;Q9NRA8-2;Q9NRA8-3	0	0	0	0	0.146159	0.179481	0	-0.32564	0	0	0
B1AKR6;Q9NP97	0	0	0	0	0	0	0	-0.325152	0.325152	0	0
B1AL05;H0Y6Y8;Q8N983;Q8N983-2;Q8N983-3;Q8N983-4;Q8N983-6;Q8N983-7	0	0	0	0	0	0	0	0	0	0	0
B1AL69;Q7L3B6	0	0	0	0	0	0	0	0	0	0	0
B1ALA9;P60891	0	0	0	0	0	0	0	0	0	0	0
B1ALD1;Q9Y6B7	0	0	0	0	0.668754	-0.431214	0	-0.23754	0	0	0
B1ALM5;Q9P0T7	0	-0.523908	0	0	0.052992	0.470916	0	0	0	0	0
B1ALY0;Q8IXS6-2	0	0	0	0	0	0	0	0	0	0	0
B1AM21	0	0	-0.114973	0	0	0	0	0	0	0.216634	-0.101661
B1AM27;O14795;O14795-2
B1AMI2	0	0	-0.458411	0	0	0	0	0	0	0.458411	0
B1AMN7;Q9P2B4	0	0	0.524516	0	0	0	-1	0	0	0	0.475484
B1AMS2;Q14141;Q14141-2;Q14141-4	0	0	-1	0	0	0	1	0	0	0	0
B1AMT9;B1AMU0;B1AMU5;Q969W1;Q969W1-2;Q969W1-3;Q969W1-4
B1AMW1;H0YDI1;P19256;P19256-2;P19256-3	0	0	0	0	0	-0.0390261	0	0	0	0	0.0390261
B1ANE6	1	0	0	0	0	0	0	0	-1	0	0
B1ANH0;B1ANH2;Q16774;Q16774-2
B1APN9;O75335	0	0	-0.0694397	0	0	0	0	0	0.0694397	0	0
B1APR7;Q99504;Q99504-2;Q99504-3;Q99504-4;Q99504-5	0	0	0	0	0.379962	0	0	0	-0.379962	0	0
B1AQK6;B1AQK7;E9PDR3;F6RH32;Q00975;Q00975-2	0	0	0.684018	0	-1	0	0	0	0	0.315982	0
B1AVT0;P49760;P49760-3	0	0	-0.425242	0	0	-0.372757	0	0	0	0.797999	0
B1AXG1;B4DG22;B7ZB17;P51812	0	0	0	0	0	0	0	0	0	0	0
B2RC85;B2RC85-2;H0YFY2;P0C881	1	0	0	0	-0.594315	0	0	-0.405685	0	0	0
B2WTI3;B2WTI4;K7EJU9;Q6NYC1;Q6NYC1-2;Q6NYC1-3	0	0	0	-0.294115	0.294115	0	0	0	0	0	0
B3EWG3;B3EWG5;B3EWG6	0.0837037	0	0	-0.0837037	0	0	0	0	0	0	0
B3KP42	0.238585	0	0.492566	0	0	0	0	0	0	-0.73115	0
B3KP96;H0Y626;J3QKY5;K7EL43;K7ENN8;O95361;O95361-2	0	0	0	0	1	0	0	-0.538534	0	0	-0.461466
B3KS81	0	0	0	0	-0.4028	0	0	-0.297947	0.700747	0	0
B3KT41;Q496J9	0	0	0	0	1	0	0	0	-1	0	0
B3KTM8;H0YLJ3;Q9UBU8-2	0	0	-0.332683	0	0	0	0	0	0	0.332683	0
B3KUS5;Q70CQ3	0	0	0	0	0	0	0.0963972	0	0	0.248051	-0.344448
B3KVY5;F5GWA4;F5GWK6;F5H268;Q9H3F6;Q9H3F6-2;Q9H3F6-3	0	0	-0.303136	0	0	-0.341599	0.377348	0	0	0	0.267387
B3KY94;O14735;O14735-3	0	0	0	0	0	0	0	0	0	0	0
B4DDD6	0	0	0	0	0	0	0	0	0	0	0
B4DDF4;B4DUT8;Q99439	0	0	0	0	0	0	0	0	0	0	0
B4DEE8;P16455
B4DEN4;B8ZZ56;E7EV05;E9PFU9;Q8WV99;Q8WV99-2
B4DFC0;E9PMV6;E9PR50;G3V1B4;H0YD20;H0YE53;H0YEL8;Q9UGK8;Q9UGK8-2	0.701953	0	0	-0.701953	0	0	0	0	0	0	0
B4DI03;K7EJQ7;Q9BY50	0	0	0	0	0	0	0	0	0	0	0
B4DJ07	-0.219183	0	0	0	0.51463	0	0	-0.295447	0	0	0
B4DJV2;O75390	0	0	0	0	0	0	0	0	0	0	0
B4DJV5;Q13610	0	0	0	-0.631787	0	0	0	0	0.631787	0	0
B4DK77;Q9H6K4	0	0	0	0	0	0	0	0	0	0	0
B4DL54	0	0	0	0	0	0	0	0	0	0	0
B4DLJ1	0	0	0	0	0	0	0	0	0	0	0
B4DLN1	0	0	0	0	0	0	0	0	0	0.306384	-0.306384
B4DLP0;B8ZZF7;O00338;O00338-2
B4DR61;P61619	0	0	0	0	0	0	0	0	0	0	0
B4DR80;Q9Y6E0;Q9Y6E0-2
B4DUC8;Q13126	0	0	0	0	0	0	0	0	0	0	0
B4DUJ5;Q8IWP9	0	0.53908	0	0	-1	0	0	0	0	0	0.46092
B4DVN3;E7ESC7;Q7L5Y9;Q7L5Y9-3
B4DVT3;Q96SY0	0	0	0	0	0	0	0	0	0	0	0
B4DXZ6;P51114	0	-0.346073	0	0	0	0	0	0	0	0	0.346073
B4DYU2;H3BQV3;Q96MW5	0	0	0	-0.0926435	0	0	0	0	0.0926435	0	0
B4DYY6;Q75T13;Q75T13-2;Q75T13-3	0	-0.441409	0	0	0	-0.273913	0	0	0	-0.284678	1
B4E0E3;G3V1M5;Q9H6X4;Q9H6X4-2;Q9H6X4-3	0	0	0	0	0	1	0	-1	0	0	0
B4E0T2;P50542;P50542-4	0	0	0	0	0	0	0	0	0	0	0
B4E107;F5GXE4;O95260-2	0	0	0	0	0	0	0	0	0	0	0
B4E1G1;Q9BUN8;Q9BUN8-2	0	0.370808	0	0	-0.370808	0	0	0	0	0	0
B4E1Q4;O14730	0	0	0	0	0	0	0	0	0	0	0
B4E1Z4	-0.310667	0.310667	0	0	0	0	0	0	0	0	0
B4E2Q0;P98194;P98194-4	0	0	0	0	-0.367455	0	0	0.367455	0	0	0
B4E3T4;Q93062;Q93062-2;Q93062-3;Q93062-4;Q93062-5	0	0	0	0	0	0	0	0	0	0	0
B5MC20;P0C870	0	0	0	-1	0.392141	0	0	0	0.607859	0	0
B5MC22;Q9UDX5	0	0	0	0	0	0	0	0	0	0	0
B5MC35;B5MCA1;B5MD16;Q96G28;Q96G28-2	0	0	0	0	0	0	0	0	0	0	0
B5MC53;B5MCF8;E7EX18;G5E9F5;P39210	0	0	0	0	0	0	0	0	0	0	0
B5MCF4;C9JDC5;P05230;P05230-2	0	0	0	0	0	0	0	0	0	0	0
B5MCF9;O00541;O00541-2	0	0	0	0	0	0	0	0	0	0	0
B5MCN7;Q15788;Q15788-2;Q15788-3
B5MCQ6;B5MCU6;B5MCV5;E7ETT9;Q96DB2;Q96DB2-2	0.691532	-0.583354	0	0	0	0	0	0	0	0	-0.108178
B5MCX7;C9JX82;D3YTC9;F8WB76;H7C3L3;Q6NXT1;Q6NXT1-2	-0.35475	0	0	0	0.35475	0	0	0	0	0	0
B5MDF5;J3KQE5;P62826	0	0	0	0	0	0	0	0	0	0	0
B5MDL5;P53778;P53778-2	-0.156819	0	0	0.156819	0	0	0	0	0	0	0
B5MDU6;Q9H6V9;Q9H6V9-2	0.527029	-0.527029	0	0	0	0	0	0	0	0	0
B5ME97;E7EW69;E7EX04;Q9P0V9;Q9P0V9-2;Q9P0V9-3	0	0	-0.385844	0	0	0	-0.614156	0	0	1	0
B5MEF5;Q8TER0;Q8TER0-3;Q8TER0-4;Q8TER0-5	0	0.262195	0	0	0	-0.265464	0	0	0	0	0.00326941
B7WNH4;E9PLH2;E9PNA8;E9PP42;M0QYU9;M0R0R3;M0R2G5;Q9BQ49	0	0	0	0	-0.264034	0	0	0.264034	0	0	0
B7WNR7;Q5HYL7-4	0.41252	0	0	0	0	0	0.58748	0	0	-1	0
B7WP74;Q9HCG8	0	0	-0.283105	0	0	0	0	0	0	0	0.283105
B7WPE2;Q32P44	0	0	0	-0.0912445	0	0	0	0	0.0912445	0	0
B7WPG3;C9IYN3;Q8WVV9;Q8WVV9-4;Q8WVV9-5;V9GYK2	0	0	0	0	0	0	0	0	0	0	0
B7WPL0;Q9NVN3;Q9NVN3-1;Q9NVN3-3	0	0	0	0	-0.21697	0	0	-0.319392	0.536362	0	0
B7WPL9;F8W9A8;Q6PFW1;Q6PFW1-2;Q6PFW1-3;Q6PFW1-4;Q6PFW1-5;Q6PFW1-6;Q6PFW1-7	0	0	-1	0	1	0	0	0	0	0	0
B7Z278;Q8WZA2;Q8WZA2-2;Q8WZA2-3;Q8WZA2-4;Q8WZA2-5
B7Z2R2;P14927;P14927-2	0	0	0	0	0	0	0	0	0	0	0
B7Z2R7;Q5T8D3;Q5T8D3-2;Q5T8D3-3	0	0	0	0	0	0	-0.455823	0	0	0.455823	0
B7Z493;E9PJX4;F8VWL3
B7Z4L1;B7Z4U3;E7EPD9;E7EPW5;E9PCV1;G3XAH9;H7BXS2;Q9NRC1-2;Q9NRC1-3;Q9NRC1-4;Q9NRC1-5;Q9NRC1-6	0	0.232304	0	0	0	0	0	0	0	-0.496587	0.264283
B7Z4S1	0	0	0	0	0	0	0	-0.395542	0.395542	0	0
B7Z4W8;E9PD09;Q96HH9;Q96HH9-2;Q96HH9-3;Q96HH9-4;Q96HH9-5	-0.438934	0.667686	0	0	-0.561066	0	0	0	0	0	0.332314
B7Z5P7;O60711;O60711-2	-1	0	0.18137	0	0	0.29038	0	0	0	0	0.52825
B7Z6D5;Q96GQ7	0	0	0	0	0	0	0	0	0	0	0
B7Z6J7;H7C148;O75175
B7Z6Q0;Q12980
B7Z7D2;E9PQY3;P11117	0	0.110948	0	0	0	0.129236	0	0	0	0	-0.240184
B7Z7P8;P62495;P62495-2
B7Z8H2;O14717;O14717-2;O14717-3;O14717-4;O14717-5;O14717-6;Q7Z3E4	0	0	0	0	0.465448	-0.447235	0	0	0.534552	-0.552765	0
B7Z8Q8;Q6NUS8	0	0	0	0	0	0	0	0	0	0	0
B7Z9C2;F5H4R6;F8VV59;F8VY35;F8W020;F8W0J6;F8W118;F8W543;H0YH88;H0YHC3;H0YIV4;P55209;P55209-2
B7Z9I1;P11310;P11310-2;Q5T4U5	0	0	0	0	0	0	0	0	0	0	0
B7ZAP0;F5H8L0;Q5R372-5;Q5R372-6;Q5R372-7;Q5R372-8	0	0	0	0	0	0	0	0	0	0	0
B7ZAQ6;B7ZAQ6-2;B7ZAQ6-3;P0CG08	0	-1	0	0	0.56079	0	0	0.43921	0	0	0
B7ZBB8
B7ZBC8;B7ZBC9;O75449	-1	0	0	0	0.351618	0	0	0	0.648382	0	0
B7ZC38;Q9NR46	0	0	0	0	0	0	0	0	0	0	0
B7ZKQ9;Q8WTV0-2;Q8WTV0-4	0	-0.0273554	0	0	0	-0.0127336	0	0	0	0	0.0400889
B7ZL88;Q8N8Q8	0	0	0	0	0	0	0	0	0	0	0
B7ZLQ8;E5RJM0;Q17RY0;Q17RY0-2	0	1	0	0	-1	0	0	0	0	0	0
B8ZZ19;H0Y3U0;P20472	0	0	0	0	0	0	0	0	0	0	0
B8ZZ47;H0Y714;Q96G21	0.318001	0	-0.318001	0	0	0	0	0	0	0	0
B8ZZ50;B9A044;C9JEL3;O60573;O60573-2
B8ZZ98;Q8WVK2	0	0	0.603237	0	-0.603237	0	0	0	0	0	0
B8ZZ99;F8WCZ3;Q96NT0;Q96NT0-2	0	0.102237	0	0	-0.468279	0.366042	0	0	0	0	0
B8ZZD4;Q86VP1;Q86VP1-2;Q86VP1-3;Q86VP1-4	0	0	0	0	0	-0.500777	0	0	0	1	-0.499223
B8ZZF5;C9J5M4;Q9H8M9	0	0	0.234392	0	0	-0.142813	0	0	0	0	-0.0915792
B8ZZJ6;H7C1S9;Q8TD22	0	0	0	0	0	0	0	0	0	0	0
B8ZZK5;O43924
B8ZZQ6;P06454;P06454-2	0	0	0	0	0	0	0	0	0	0	0
B8ZZU8;Q15370;Q15370-2	0	0	0	0	0	0	0	0	0	0	0
B8ZZV9;B8ZZX2;Q9H8M1;Q9H8M1-2	0	0	0	0	0	0	0	0	0	0	0
B8ZZY8	0	0	0	0	1	0	0	0	-1	0	0
B8ZZZ1;F8W8K9;G5E966;Q96PC3;Q96PC3-2;Q96PC3-3;Q96PC3-4	0	0	0	0	-0.293385	0	0	0.293385	0	0	0
B9EGA3;J3KMX2;Q92925;Q92925-2;Q92925-3	0	0	0	0	0	0	0	0	0	0	0
B9EJG8;B9EJG8-2;D6RAQ9;D6RDW6	0.300339	0	0	0	-0.658131	0	0	0.357792	0	0	0
B9ZVN9;O95602	0	0	-0.244482	0	0	0	0	0	0	0	0.244482
C4AMC7;Q6VEQ5	0	0	0	0	-0.473685	0	0	0.473685	0	0	0
C4B7M2;Q96JI7;Q96JI7-2;Q96JI7-3	0.0573693	0	0	0	-0.0573693	0	0	0	0	0	0
C4P0D6;C4P0D8;Q99598	0	0	0	0	0	0	0	0	0	0	0
C9IYN7;C9J2D6;C9J9N8;C9JA82;C9JEX8;C9JLH5;Q0PNE2;Q0PNE2-2	0	0	0	0	0	0	0	0.406304	-0.406304	0	0
C9IYT0	0	0	0.0715316	0	-0.571508	0	0	0	0	0	0.499977
C9IZ93;C9J9P8;C9JF62;Q969M7;Q969M7-2;Q969M7-3;Q969M7-7
C9IZF6;P41247	0	0	0	0	0	0	0	0	0	0	0
C9IZU8;C9J9T0;Q96AT9	0	0	0	0	0	0	0	0	0	0	0
C9J050;C9JEJ2;P49585	0	0	0	0	0	0	0	0	0	0	0
C9J066;E9PN67;Q8N4C6;Q8N4C6-10;Q8N4C6-11;Q8N4C6-2;Q8N4C6-4;Q8N4C6-5;Q8N4C6-6;Q8N4C6-7;Q8N4C6-9	0	0	0	0	0	0	0	0	0	0	0
C9J0A4;P57723;P57723-2	0.45068	0	0	0	0.0728544	-0.523534	0	0	0	0	0
C9J0A7;Q9UQN3;Q9UQN3-2	0	0	0	0	0	0	0	0	0	0	0
C9J0I9;Q86WB0;Q86WB0-2;Q86WB0-3	0	0	-0.0665029	0	0	0	-0.472938	0	0	0.53944	0
C9J0J0;Q96EE4	0	0	0	0	0	0	0	0	0	0	0
C9J0J7;G5E9Q6;P35080-2	0	0	0	0	0	0	0	0	0	0	0
C9J0K6;P30626;P30626-2;P30626-3	0	0	0	0	0	0	0	0	0	0	0
C9J159;F5H6W4;Q9H992
C9J165	0	0	0	0	-0.0818805	0	0	0.179794	-0.0979138	0	0
C9J1C6;Q9P0P0	0	0	0	0.322439	0	0	0	0	-0.322439	0	0
C9J2C0;Q9NY65;Q9NY65-2
C9J2P9;Q75N03;Q75N03-2	0	0	0.564266	0	0	-0.520819	0	0	0	0.435734	-0.479181
C9J2Y9;P30876	0	0	0	0	0	0	0	0	0	0	0
C9J365;C9JA28;Q9UNL2;Q9UNL2-2	0	0	0	0	-0.57423	0	0.442592	0	0	0.557408	-0.42577
C9J3D7;Q9UKG9;Q9UKG9-3	0	0	0	0	0	0	0	0	0	0	0
C9J3R8;E7ETS9;O60513	0	0	0	0	-0.321567	0	0	0	0	0.321567	0
C9J406	0	0	0	0	0	0	0	0	0	0	0
C9J494;Q9H000;Q9H000-2
C9J4X5;Q96EU6;Q96EU6-2;Q9H160;Q9H160-2	0	0	0	0	0	0	0	0	0	0	0
C9J4Z3;P61513	0	0.506474	0	0	0	0	0	0	0	-0.506474	0
C9J555;J3QLM1;J3QLS1;Q14849	0.51235	0	0	0	0.48765	0	0	0	-1	0	0
C9J597;C9JF31;Q9BV87	0.499716	0	-0.257392	0	0.500284	0	0	0	-0.742608	0	0
C9J5D1;E7EQ69;Q9GZZ1	0	0	0	0	-0.0207654	0	0	0.0207654	0	0	0
C9J5N1;Q9BTE6;Q9BTE6-2;Q9BTE6-3	0	0	0	0	0	0	0	0	0	0	0
C9J6G3;C9J7M1;O95749	0	0	0	0.355416	0	0	0	0	-0.355416	0	0
C9J6K0;Q13103	-0.50929	0	0.417946	0	0.582054	-0.49071	0	0	0	0	0
C9J6K3;C9JM54;Q9HC52	0	0	0	0	0	0	0	0	0	0	0
C9J6P4;Q7Z2W4	0	0.365476	0	0	0	0	-0.66883	0	0	0.303354	0
C9J6W0	-0.610937	0	0	0	0.610937	0	0	0	0	0	0
C9J712;P35080	0	0	0	0.402902	0	0	0	0	-0.402902	0	0
C9J758;Q969T7;Q969T7-2	0	0	0	0	0	0	0	0	0	0	0
C9J798;E5RK78;E7ERK1;F5GXT2;F8W6L0;O43374;O43374-2	0	0	-0.612478	0	0	0	0.256146	0	0	0.356332	0
C9J7E5;Q9Y5L0;Q9Y5L0-1	0	0	0	0	0	0	0	0	0	0	0
C9J7E8;Q9UL63;Q9UL63-2	0	0	0.536935	0	0.463065	0	0	0	-1	0	0
C9J7K9;C9J9P4;H7C5I5;O15162;O15162-2	0	-0.565989	0	0	0	0	0	0	0	0.600808	-0.0348193
C9J813	0	0	-1	0	0	0	1	0	0	0	0
C9J8S2;Q99969	0	-0.347742	0	0	0	0.347742	0	0	0	0	0
C9J8T4;C9JYN7;O43567	0	0.68066	0	0	-0.415049	-0.26561	0	0	0	0	0
C9J975;E7ESL9;Q96P47;Q96P47-2;Q96P47-3;Q96P47-4;Q96P47-6	-0.329346	0	0	0	0	0	0	0.388021	-0.0586745	0	0
C9JA08;Q96D46
C9JA90	0	0	0	0	-0.402479	0	0	0.402479	0	0	0
C9JAX1;Q16595	0	0	0	0	0	0	0	0	0	0	0
C9JB28;C9JPS5;Q6ZMH5	0	0.334789	0	0	0	0	0	0	0	0	-0.334789
C9JB30;Q9UPY8	0	0	0	0	0	0	0	0	0	0	0
C9JBG5;E9PMC3;F5H8L4;Q8NBJ9;Q8NBJ9-2	0	0	0	0	0.48588	0.51412	0	-1	0	0	0
C9JBI3;P78330	0	0	0	0	0	0	0	0	0	0	0
C9JBY7;Q9Y291	0	0	0	0	0	0	0	0	0	0	0
C9JCC6;E9PQX9;Q14919;Q14919-2	0	0	0	0	0	0	0	0	0	0	0
C9JCU6;F2Z2B3;F8WCP4;Q12851;Q12851-2	0	0	-0.282513	0	0	0	0	0	0.282513	0	0
C9JEG3;Q9UBQ6	0	0	0	0	0	0	0	0	0	0	0
C9JEH3;C9JG97;Q13685	0	0	0	0	0	0	0	0	0	0	0
C9JEK0;C9JP86;Q08AI8	0.390623	0	0	0	0.609377	0	0	0	-1	0	0
C9JER6;P61366	-0.367214	0	0	0	0.41144	-0.335945	0	0	0	0	0.291719
C9JF50;E9PLU1;E9PRK5;E9PRW1;E9PSD6;Q9H019;Q9H019-2;Q9H019-3	0	-0.524763	0	0	0	-0.475237	0.270424	0	0	0.729576	0
C9JFE4;Q13098;Q13098-5;Q13098-7	0	0	0	0.0408816	0	0	0	0	-0.0408816	0	0
C9JFR7;P99999	0	0	0	0	0	0	-0.189185	0	0	0.189185	0
C9JFV4;Q8IZL8	0	0	-0.318201	0	0	0	0	0	0	0.318201	0
C9JFX4;E9PLG6;E9PSD9;Q6IA17;Q6IA17-2	0	0	0	0	0.562149	0	0	-0.562149	0	0	0
C9JG87;Q9NYK5;Q9NYK5-2	0	0	0	0	0	0	0	0	0	0	0
C9JHD7;C9JJK9;Q86YP4;Q86YP4-2;Q86YP4-3	0	0	0	0	0	0	0	0	0	0	0
C9JIF9;P13798	0	0	0	-0.0407076	0	0	0	0	0.0407076	0	0
C9JIT1	-0.230088	0	0	0	-0.231464	-0.293915	0	-0.244533	0.561153	0.438847	0
C9JIZ6;P07602;P07602-2;P07602-3	0	-0.457905	0	0	0	0.457905	0	0	0	0	0
C9JJ19;P82930	0	0	0	0	0	0	0	0	0	0	0
C9JJM2;Q96MV1;S4R434	0	-0.689409	0	0	0.689409	0	0	0	0	0	0
C9JJN9;Q8N3P4;Q8N3P4-2;Q8N3P4-3	0	0	0	0	0.366049	0	0	-0.202244	-0.163805	0	0
C9JJT5;G3V325;P56134-2;P56134-4	0	0	0.297285	0	0	0	0	0	0	-0.297285	0
C9JJX6;E9PDC3;O00192;O00192-2	0	0	0	0	0	-0.28001	0	0	0	-0.236365	0.516374
C9JK83;O95630;O95630-2	0	0	0	-0.572468	0.4339	0	0	0	0.138568	0	0
C9JKL2;C9JPX5;O95772;O95772-2	-0.218472	0.450983	0	0	0.0228388	-0.0119436	0	0	0	0	-0.243405
C9JLB7;Q96HP4;U3KQU8	0	0	0.249606	0	0	0	0	0	0	-0.249606	0
C9JLU1;P52434;P52434-4	0	0	-0.312414	0.312414	0	0	0	0	0	0	0
C9JLW8;I3L2L5;I3L4Q0
C9JNE2;Q9Y530
C9JNW5;C9JXB8;P83731	0	-0.628578	0	0	0	0	0	0	0	0.628578	0
C9JNZ0;C9JRY4;Q96IW7	-0.204391	0	0	0	0.479833	-0.275442	0	0	0	0	0
C9JP16;O75718	0	0	0	0	0	0	0	0	0	0	0
C9JP85;Q16656;Q16656-2;Q16656-4	0	0	0	0	0	0	0	0	0	0	0
C9JPG5;Q13275;Q13275-2	-0.577767	0	0	0.577767	0	0	0	0	0	0	0
C9JQ41;H7C525;Q4VC31	0	0	0	0	0	0	-0.590718	0	0	0.590718	0
C9JQ60
C9JQD4;O43447	0	0	0	0	0	0	0	0	0	0	0
C9JQI7;C9JQI7-2;D6RC30	0	-0.00763951	0	0	0	0.0784002	0	0	0	0	-0.0707606
C9JQS9;E7ETT1;E7ETT4;E7EX59;E9PDR0;P05166;P05166-2	0	0	0	0	0	0	0	0	0	0	0
C9JQV0;H7C0T1;H7C2R9;Q9BRJ6	0	-1	0	0	0	0	0	0	0	1	0
C9JR56	0	0	0	0	0	0	0.203114	0	0	0.022148	-0.225262
C9JRD2;P25686;P25686-2	0	0	0	0	0	0	0	0	0	0	0
C9JRZ6;Q9NX63	0	0	0	0	0	0	0	0	0	0	0
C9JS50;Q687X5
C9JSU1;Q9Y608;Q9Y608-2;Q9Y608-4;Q9Y608-5	0	0	-1	0	0	0.537492	0	0	0	0	0.462508
C9JUQ8	-0.017914	0	0	0	0	0	0	0.539041	-0.521127	0	0
C9JW74;C9JWU9;Q5EB52;Q5EB52-2;Q5EB52-3	0	0	0.267627	0	0	0	0	0	0	-1	0.732373
C9JXM5;G5E9W1;Q7Z3E1	0	-0.663819	1	0	0	-0.336181	0	0	0	0	0
C9JY79;M0QZQ3;Q9H254;Q9H254-4	0	0	-0.254805	0	0	-0.266413	0	0	1	0	-0.478782
C9JYJ6;Q4L180-3;Q4L180-5;Q4L180-7	0	0	0	0	0	0	0	0	0	0	0
C9JYM0;O75817	0	-0.347548	0	0	0	0	0	0	0	0	0.347548
C9JYS5;J3KS67;J3QL47;J3QL63;K7ENL4;Q96ET8-3;Q9NYZ1	0	0.620643	0	0	-0.620643	0	0	0	0	0	0
C9JZ38
C9JZB3;Q16821	-0.248305	0	0	0	0.349796	0	0	0	0	-0.33273	0.231239
C9JZF7;G5E9W2;Q9P2E5;Q9P2E5-2	0	0.531842	0	0	-0.531842	0	0	0	0	0	0
C9JZG9;C9JZY6;P62256	0	0	0	0	0	0	0	0	0	0	0
C9JZI1;P35249;P35249-2	0	0	0.0429382	0	0	0	0	0	0	0	-0.0429382
C9JZI7	0	0	0	0	0	0	0	0	0	0	0
C9JZR2;O60716;O60716-10;O60716-11;O60716-13;O60716-2;O60716-3;O60716-5;O60716-9	0	0	0	0	0	-0.422671	0	0	0	0	0.422671
C9K058;Q9H2H8	0	0	0	0	0	0	0	0	0	0	0
C9K0C8;Q9NS00;Q9NS00-2	0	0	0	0	0	0	0	0	0	0	0
C9K0I9	0	0	-0.309424	0	0	-0.244199	0	0	0	0	0.553623
D3DQV9;H0Y3P2;P78344;P78344-2	0	0	0	0	0	0	0	0.654412	-0.654412	0	0
D3DUJ3;K7EIE9;K7EQG9;P17706;P17706-2;P17706-3;P17706-4	0	0	0.400003	0	0	0	0	-1	0	0	0.599997
D3DWX8;P98173;P98173-2;P98173-3;Q5HY75	0	-0.402623	0	0	0.0985647	0	0	0.304059	0	0	0
D3YTA9;F6U1T9;P63098	0	0	0	0	0	0	0	0	0	0	0
D3YTC7;Q9UBM1;Q9UBM1-2;Q9UBM1-3
D5H3J5;Q2L6G2	0	0	-0.474451	0	0	-0.19404	0	0	0	0	0.668491
D6R927;D6R946;D6R9K5;D6R9X3;D6RA45;D6RAT2;D6RB37;D6RBQ8;D6RCM1;D6REC2;D6REP3;D6RF98;D6RIV8;D6RIZ8;Q06330;Q06330-4;Q06330-5;Q06330-6;Q06330-7	0	0	0	0	0	0	0	0	0	0	0
D6R938;Q13557;Q13557-10;Q13557-11;Q13557-12;Q13557-3;Q13557-4;Q13557-5;Q13557-6;Q13557-8;Q13557-9	0	0	0	0	0	0	0	0	0	0	0
D6R9C7	0	0	0	0	-1	0	0	0	0	1	0
D6R9P3	0	0	0	0	0	0	0	0	0	0	0
D6R9P8;Q6AWC2;Q6AWC2-4;Q6AWC2-6	0	0	0	0	0	0	0	0.298687	-0.298687	0	0
D6R9S2;D6RIC1;H0Y8L2;H0YEZ3;H0YJP6;P59282	0.544344	0	0	-0.696951	0.455656	0	0	-0.303049	0	0	0
D6R9S7;D6RDB0;D6RHE3;Q96GZ6;Q96GZ6-2;Q96GZ6-5;Q96GZ6-6;Q96GZ6-7;Q96GZ6-9	0	0	-0.354094	0	-0.00889712	0	0	0.362991	0	0	0
D6R9Z7;P15954	0	0	0	0	0	0	0	0	0	0	0
D6RA47;D6RE79;D6RIZ4;Q14728	0	-0.3493	0	0	0	0	0	0	0	0	0.3493
D6RA57;D6RC31;D6RE67;H0Y9X1;Q96EY4	0	0	0.351136	0	0	0	0	0	0	0	-0.351136
D6RA82;P12429	0	0	0	0	0	0	0	0	0	0	0
D6RA96;Q9NZ71;Q9NZ71-2;Q9NZ71-4;Q9NZ71-6;Q9NZ71-7;Q9NZ71-8;X6R5I7
D6RAD4;P50613	0	0	0	0	0	0	0	0	0	0	0
D6RAD5	0.596038	0	0	0	0	0	0	0	0	-0.596038	0
D6RAJ6;Q9UKT5;Q9UKT5-2	0	0	0	-1	0.2946	0	0	0.28034	0.42506	0	0
D6RAN1;D6RF83;D6RH06;H7BYK4;Q9NR12;Q9NR12-2;Q9NR12-3;Q9NR12-4;Q9NR12-5;Q9NR12-6	0	0	0.108852	0	0	0	0	0	0	0	-0.108852
D6RAN8;H7C5U8;Q9P0M9	0	0	0	0	0	0	0	0	0	0	0
D6RAR4;Q04756
D6RAZ3;E7EMP6;Q96FZ2	-1	0	0	0	0.548411	0	0	0.451589	0	0	0
D6RB81;Q9UHK6;Q9UHK6-5	0	0	0	0	0	0	-0.433256	0	0	0.433256	0
D6RB89;P50120	0	0	0	0	0	0	0	0	0	0	0
D6RBN6	0	0	0	0	1	-0.559001	0	-0.440999	0	0	0
D6RBR7;Q9Y3S2
D6RBW1;P06730;P06730-2;P06730-3
D6RCC4;D6RCC9;Q8NEC7	0	0	0	0	0	0	0	0	0	0	0
D6RCM8;O95379;O95379-2;O95379-3;O95379-4	-1	0	0	1	0	0	0	0	0	0	0
D6RCP5;Q8N264;Q8N264-2;Q8N264-3	0	0	0	0	0	0	0	0	0	0	0
D6RDG3	-0.233205	-0.47967	0	0	-0.287124	0.351778	0	0	0	0	0.648222
D6RDG8;D6RGZ4;O43791	0	0	-0.00991613	0	0	0	0	0	0.714107	-0.353409	-0.350782
D6RDK6	0	0	0	0	0	-0.356767	0.285352	0	0	0.442521	-0.371107
D6RE84
D6REA0;O75879	0	0	0	0	0	0	0	0	0	0	0
D6REK2;H0Y9T3;Q8WV44;Q8WV44-2;Q8WV44-4	0	0	-0.468436	0	0	0	0	0	0	0	0.468436
D6RER5;D6RGI3;Q9NVA2
D6REX3	0	0	0	0	0	0	0	-0.0116568	0.0116568	0	0
D6REY2;P23508;P23508-2
D6RF35;P02774;P02774-3	-0.0723521	-0.217472	0	0	0	0.289824	0	0	0	0	0
D6RF43	-0.251022	0	0	0	0.525093	-0.274072	0	0	0	0	0
D6RF48;Q9P2W9	0	0	0	0	0	0	0	0	0	0	0
D6RFG8;P27707
D6RFI1	0	0	-1	0	0.214011	0	0	0.22159	0.358644	0	0.205755
D6RFI3;E7EQR8;Q9GZM5	0	0	0	0	-0.095865	0	0	0.095865	0	0	0
D6RGG3;Q99715;Q99715-4	0	0	0.605526	0	0	-0.285435	0	0	0	-0.320091	0
D6RGK3;D6RHW1;D6RIE8;D6RIV9;D6RIY1;Q16594;Q9HBM6	0	0	0	0	0	0	0	0	0	0	0
D6RGK9;H0Y9C1;H0Y9Z5;Q96LI5	0	0	0	0	0	-1	0	1	0	0	0
D6RGZ3;Q8N1W1;Q8N1W1-3;Q8N1W1-4;Q8N1W1-5;Q8N1W1-6	0	0	-0.220138	0	1	-0.336919	0	0	0	-0.442943	0
D6RH21	0.626363	0	0	0	-1	0	0.373637	0	0	0	0
D6RHG0;P78383
D6RHH9;Q8TCT1;Q8TCT1-2;Q8TCT1-3	1	0	0	-1	0	0	0	0	0	0	0
D6RHX8;F8W9W2;P43250;P43250-2;P43250-3	0	0.651546	-0.540705	0	0	0	0	0	0	0	-0.110841
D6RID8;Q13888;Q6P1K8	0	0	0.0704747	0	0	0	0	0	0	0	-0.0704747
D6RIE3	0	0	0	0	0	0	0	0	0	0	0
D6RIG4;Q9HCL0;Q9HCL0-2	0	0	0	1	0	0	-1	0	0	0	0
D6RIT3;Q8N1A6	0	0	0	0	0	0	0	0	0	0	0
D6RIY6;Q06265;Q06265-2	0	0	-0.294116	0	0	0.294116	0	0	0	0	0
D6RJ90;Q9Y6G5	0	0	0	0	-0.019418	0	0	0.019418	0	0	0
D6RJG9;Q9Y5W7;Q9Y5W7-2;Q9Y5W7-3;Q9Y5W7-4	0.458275	-0.601958	0	0	0	0	0	0.541725	0	0	-0.398042
E1CKY7;O60237;O60237-4;O60237-6	0	0	0	0	0	0	0.299376	0	0	-0.299376	0
E2QRG8
E2QRK7;Q5JTD0;Q5JTD0-2	0	0	0	0	-0.33466	0	0	-0.173095	0.507755	0	0
E3W980;E3W982;Q8TDG4	0	0	0	0	0	-1	0	0	1	0	0
E5KLJ9;O60313-10;O60313-2;O60313-9	0	0	0	0	0	0	-0.117209	0	0	0.117209	0
E5RFE0;E5RGT8;Q9UQ10	0	0	0	0	0	0	0	0	0	0	0
E5RFF8;J3KNU2;Q8IX29;Q8IX29-2	0	0	0	0	0	0	0	0	0	0	0
E5RFT4;Q8N4L2
E5RFV7;O00300	0	0	0	0	0	0	0.23384	0	0	-0.23384	0
E5RFX7	-0.447739	0	0	0	0	0	0.557738	0	0	0	-0.109999
E5RG15;E5RHB3;Q8NBP0;Q8NBP0-2	0	0	-0.162609	0	0	0	0	0	0	0	0.162609
E5RG17;G5EA19;H0YBX2;Q6P1N9;U3KQS5	0	0	0	0	0	0	0	0	0	0	0
E5RG29	0	0.297553	0	0	0	-0.297553	0	0	0	0	0
E5RG44;E5RGJ1;E5RIT1;Q629K1	0	0	0	0	0	0	0	0	0	0	0
E5RGB7;E5RGH1;H0YBV9;Q7Z388	-0.0498059	0	0	0	0	-0.39641	0	0	0	0	0.446216
E5RGU4
E5RGZ2;H0YKJ1;Q6NT76;Q6NT76-2;Q6NT76-3;Q6NT76-5	0	1	0	0	0	0	0	0	0	-1	0
E5RHC5;Q8N6T3;Q8N6T3-3	0.0305646	0	0	-0.0305646	0	0	0	0	0	0	0
E5RHG8;Q15369	0	0	0	0	0	0	0	0	0	0	0
E5RHW4;O94905	0.0115526	-0.0115526	0	0	0	0	0	0	0	0	0
E5RIA2;E7EUF1;Q13822;Q13822-2;Q13822-3
E5RIA9;Q9UJ68;Q9UJ68-5	0	0	0	0	0	0	0	0	0	0	0
E5RIH5;Q6NXR4	0	0	0	0	0.228537	0	0	0.248587	-0.477124	0	0
E5RIT6;Q9UNX3	0	0.350058	0	0	0	0	0	0	0	-0.350058	0
E5RIW3;E5RJD8;O75347	0	0	0	0	0	0	0	0	0	0	0
E5RIW9;P28328	0.323631	0	0	0	0	-0.37114	0.353599	0	0	0	-0.30609
E5RJ29;Q9NYI0;Q9NYI0-2	0	0	0	0	0	-0.273188	1	0	0	-0.259535	-0.467277
E5RJ36;H0YAX6;Q14CS0
E5RJF8;E5RK82;O15182	0	0	0.346755	0	0	-0.346755	0	0	0	0	0
E5RJN7;E7EPX0;E7EVI1;E7EVJ4;Q9NUL3;Q9NUL3-2;Q9NUL3-3;Q9NUL3-6;Q9NUL3-7;Q9NUL3-8	0	0.288886	0	0	0	-0.288886	0	0	0	0	0
E5RK69
E7EM64;Q7L5N1
E7EM72;E7EWQ4;O75912	0	0	0	0	0.663422	0	0	0.336578	-1	0	0
E7EMB1;Q9UH65	0	0	0	0	0	0	0	0	0	0	0
E7EMC7;Q13501	0	0	0	0	0	0.496744	0	0	0	0	-0.496744
E7EMD6;O43572	0	0	0	0	-0.705168	0	0	0.257142	0.448026	0	0
E7EMK3;J3QLD9;Q14254	0	0.525679	0	0	0	-0.428681	0	0	0	0	-0.096998
E7EMS2;G3V3D1;G3V3E8;J3KMY5;P61916	-0.0342658	0.433145	0	0	0	-0.071959	0	0	0	0	-0.32692
E7EMT5;P04798	0	0.287833	0	0	-0.287833	0	0	0	0	0	0
E7EMT6;E7ENY2;E7EQA9;E7EV32;E7EVA2;E7EW82;H7C3L4;Q92844	0	0	0	0	0.258781	0	0	0.262899	-0.52168	0	0
E7EMZ9;E9PBC6;O95359;O95359-3
E7EN24;Q12864	0	0	0	0	-0.451522	-0.273955	0.395157	0	0	0	0.33032
E7EN73;Q8IZA0;Q8IZA0-2	0	-0.0197674	0	0	-0.376806	0.396574	0	0	0	0	0
E7EN91;Q9BWF2	0	0	0	-0.067043	0	0	0	0	0.067043	0	0
E7END6;P04070;P04070-2	0.327585	-0.327585	0	0	0	0	0	0	0	0	0
E7ENL6;P12111;P12111-2;P12111-4	0	0	0	0	0	0	0	0	0	0	0
E7ENV7	0	0	0	0	0	-1	0.472243	0	0	0	0.527757
E7ENY0;E7EV99;P35611;P35611-2;P35611-3;P35611-6	0	0	-1	0	0	0	1	0	0	0	0
E7EP17;Q9NYC9;Q9NYC9-2
E7EP72;Q9UFG5	0	-0.645273	0	0	-0.354727	1	0	0	0	0	0
E7EPB3;P50914	0	0.11386	0	0	0	0	0.344136	0	0	-0.457996	0
E7EPG1;Q13201	0	0	-0.483457	0	0	0	0	0	0	0.446087	0.0373708
E7EPI0;Q9P2D0	0	0.175056	0	0	0	-0.233493	0.282651	0	0	0	-0.224214
E7EPK1;E7ES33;Q16181;Q16181-2	0	0	-1	0	0	0	1	0	0	0	0
E7EPN9;Q9Y520;Q9Y520-4;Q9Y520-5;Q9Y520-6;Q9Y520-7
E7EPS8;P28827;P28827-2	0	0	-1	0	0	0	0	0	0	0	1
E7EPT4;P19404	0	0	0	0	0	0	0	0	0	0	0
E7EQB2;E7ER44;P02788;P02788-2	0	0	0	0	0	0.0433662	-0.107186	0	0	0	0.0638197
E7EQH1;E9PMB7;E9PR55;Q8NFJ9;Q8NFJ9-2;Q8NFJ9-3	0	0	0.648614	0	0	0	0	0	0	-0.648614	0
E7EQM8;J3QRM6;J3QS93;P43146	0	0	0	0	-0.426379	0	0	0	0	0	0.426379
E7EQQ5;Q9C035;Q9C035-2;Q9C035-3;Q9C035-4;Q9C035-5;Q9C035-6	0.338653	0	0	-0.46704	0.399383	0	0	0.261964	-0.53296	0	0
E7EQT3;Q9BY07-5	0	0	0	0	0	0	0	0	0	0	0
E7EQT4;Q9UKV3;S4R3H4	0	0	0	0	0	0	0	0	0	0	0
E7EQU1;E7ES08;E9PES6;O15347	0	0	0	0	0	0	0	0	0	0	0
E7EQY1;Q96C01	0	0	0	0	0	0	-0.142538	0	0	0.142538	0
E7ER45;O43451
E7ER77;Q7Z2K6	0	0	0	0	0	0	0	0	0	0	0
E7ERI8;E7EW49;O75122-3
E7ERS3;Q86VM9	0	0	-0.00933116	0	0	0	0	0	0	0.34186	-0.332529
E7ES84;P50748	-0.599381	0	0	0	0.380569	-0.400619	0	0	0	0	0.619431
E7ES96;P49768;P49768-2	-1	0	0	0	0	0	0	0	1	0	0
E7ESA6;H0YBP1;Q05397;Q05397-7
E7ESA7;P29474	-0.420494	0	0.365792	0	0	0	0	0	0	0	0.0547015
E7ESC6;Q9UIA9	0	0	0	0	0	0	0	0	0	0	0
E7ESD2;Q641Q2;Q641Q2-2
E7ESF6;Q13094	0.262722	0	-0.556829	0	0	0	0	0	0	0.294107	0
E7ESK6;E9PBI9;P34741	0.193132	-0.610752	0	0	0	0.559594	0	0	0	0	-0.141974
E7ESL0;J3KQY1;Q9NWU5;Q9NWU5-2;Q9NWU5-3	0	0	0	0	0	0	0	0	0	0	0
E7ESP4;P17301	0	0	-0.288104	0	-0.374308	0	0.342063	0	0	-0.337588	0.657937
E7ESS3;K7EKW3;Q71RG4;Q71RG4-2	0	0.320593	0	0	-0.320593	0	0	0	0	0	0
E7ESY4;H0Y4T7;Q13330;Q13330-3	0	0	0.285728	0	0	0	0	0	0	0	-0.285728
E7ET49;Q8NCG7;Q8NCG7-2;Q8NCG7-4	0	0	0	0	0.60775	0	0	-0.60775	0	0	0
E7ET87;E7EVI4;O75410;O75410-10;O75410-2;O75410-3;O75410-4;O75410-5;O75410-6;O75410-7;O75410-9
E7ETB3	0	0	0	0	0	0	0	0	0	0	0
E7ETH0;G3XAM2;P05156	-0.232582	0.232582	0	0	0	0	0	0	0	0	0
E7ETM6;Q8N2H4	0	0	0	0	0	0	0	0	0	0	0
E7ETU5;F6Y5H0;P29558;P29558-2	-0.401381	0	1	0	0	-0.598619	0	0	0	0	0
E7ETU7;H0Y9G6;P09001	0	0	0	0	0	0	0	0	0	0	0
E7ETY4;E9PC69;Q7KZI7;Q7KZI7-10;Q7KZI7-11;Q7KZI7-12;Q7KZI7-13;Q7KZI7-14;Q7KZI7-15;Q7KZI7-16;Q7KZI7-2;Q7KZI7-3;Q7KZI7-4;Q7KZI7-5;Q7KZI7-6;Q7KZI7-7;Q7KZI7-8;Q7KZI7-9
E7ETZ4;Q9Y6E2
E7EU05;E9PLT1;P16671;P16671-3	0	0.0738375	0	0	0	-0.29057	0	0	0	0	0.216733
E7EU13;Q96P48;Q96P48-1;Q96P48-2;Q96P48-3;Q96P48-4	0	0	0	0	0	0	0	0	0	0	0
E7EU14	0	0	0	0	0	0	0	0	0	0	0
E7EUH7;Q96PZ0;Q96PZ0-2	0	0	0	0	0	0	0	0	0	0	0
E7EUJ7;Q8TC20;Q8TC20-2;Q8TC20-3;Q8TC20-5	0	0	0	0	0	0	0	0	0	0	0
E7EUU4;Q04637-8
E7EUW0;H0YA74;Q9C0I3;Q9C0I3-2
E7EV01;O15484	0	0	0	0	0	-0.466993	0.412059	0	0	0	0.0549341
E7EV71;Q14766;Q14766-2;Q14766-4;Q14766-5	0	0	0.0484548	0	0	0	0	0	0	0	-0.0484548
E7EVA0
E7EVC7;Q676U5;Q676U5-2	0	0	1	-1	0	0	0	0	0	0	0
E7EVE9;P18074	0.265981	0	-0.520248	0	0	0	0	0	0	0.254267	0
E7EVH7;F8W6L3;G3V2E7;G3V3H3;G3V5R9;Q07866;Q07866-10;Q07866-2;Q07866-3;Q07866-4;Q07866-5;Q07866-6;Q07866-7;Q07866-8;Q07866-9	0	0	0	0	0	0	0	0	0	0	0
E7EVJ5;Q96F07;Q96F07-2	0	0	0	0	-0.652171	0	0.627042	-0.347829	0	0	0.372958
E7EVM0;H0YBR7;H0YBY1;P01266;P01266-2	0	0	-0.59828	0	0	0	0.279669	0	0	0.720331	-0.40172
E7EVQ6;Q14534	0	0	0	0	0	0	0	0	0	0	0
E7EVX8;Q8WWY3	0	0	0	0	0	0	0	0	0	0	0
E7EW05;Q9NVU7;Q9NVU7-2	0	0	0.351387	0	0	0	0	0	0	0	-0.351387
E7EWD3;O75077;O75077-2	0	0.00048899	0	0	0	0	0	0	0	0	-0.00048899
E7EWM1;Q15596	-0.458924	0	0	0.625423	-0.541076	0	0	0.374577	0	0	0
E7EWP0;H0Y886;O43674;O43674-2	0	0	0	0	0	0	-0.415287	0	0	0.124418	0.29087
E7EWR4;P33240;P33240-2	0	0	0	0	0	0	0	0	0	0	0
E7EWW0;Q7Z3J2	0	0	0	0	0	0	0	0	0	0	0
E7EWX8	-0.309157	0	0	0	0.48407	-0.337053	0	0.51593	0	0	-0.35379
E7EX17;P23588	0	0	0	0	0	0	0	-0.356567	0.356567	0	0
E7EX40;Q6WKZ4;Q6WKZ4-2;Q6WKZ4-3	0	0	0	-0.398557	0	0	0	0	0.398557	0	0
E7EX44;Q05682-2;Q05682-3;Q05682-6	0	0	-0.0284275	0	0	0	0.0284275	0	0	0	0
E7EX70;Q9GZS1	0	0	0	0	0	0	0	0	0	0	0
E7EX90;Q14203;Q14203-3;Q14203-4;Q14203-6	0	0	0	0	0	0	0	-0.00599418	0.00599418	0	0
E9PAM5	0	0	0.211142	0	0	0	0	0	-0.574669	0.363527	0
E9PAV3;E9PAV3-2;F8VZJ2;F8W0W4;H0YHX9;Q13765
E9PB18;Q6UXG2;Q6UXG2-2;Q6UXG2-3;Q6UXG2-4
E9PB51;Q9BWF3	0	0	-0.430212	0	0	0.430212	0	0	0	0	0
E9PB61;Q86V81	0	0	0	0	0	0	0	0	0	0	0
E9PBC1;F6PQP6;I3L2B2;I3L2H1;I3L356;O95208;O95208-2;O95208-3;O95208-5	0	0	0	0	0	0	0.413904	0	0	0	-0.413904
E9PBF9;H7C2N6;P15336	0	0	0	-0.588124	-0.411876	0	0	0	1	0	0
E9PBP6	1	0	0	0	0	0	0	0	0	0	-1
E9PBZ2;P15428;P15428-2;P15428-4	0	0	0	0	0	0	0	0	0	0	0
E9PC53;H7C3N0;Q8TBK2;Q8TBK2-2	0	0	0	-1	0.409838	0	0	0	0.590162	0	0
E9PC61;G4U4J3;Q8NDF8;Q8NDF8-2;Q8NDF8-3;Q8NDF8-5	0	0	0	0	0	0	0	0	0	0	0
E9PC66;P17029	0	0	-1	0	0.459535	0	0	0.540465	0	0	0
E9PC87;O94876;O94876-2	0	0	0	0	0	0	0	0	0	0	0
E9PC90;H0YA62;P14635;P14635-2	0.449843	0	0	0	0	-0.494612	0	0	0	0	0.0447692
E9PCD7;H0YA68;Q9Y2E5;Q9Y2E5-2
E9PCJ7;G3V336;Q8N806	-1	0	0	0.610874	0.389126	0	0	0	0	0	0
E9PCN2;Q02153;Q02153-2	0	0	0	0	0	0	0	0	0	0	0
E9PCP0;F5H0S8;F5H100;F5H8J8;P16520;P16520-2	-1	0	0	0	0	0.449889	0	0	0	0	0.550111
E9PCQ7;F8WD67;F8WD87;O43709;O43709-2;O43709-3	0	0	0	0	0	0	0	0	0	0	0
E9PCW1;G5E9T8;K7EJC8;O95249	0	0	0	0	0.017188	0	0	-0.017188	0	0	0
E9PCX2;P15121	0	0	0	0	0	0	0	0	0	0	0
E9PCX5	0	0	0	0	-0.480472	0	0	1	0	-0.519528	0
E9PD50;Q92540;Q92540-2;Q92540-4	0	0	0	0	0	0	0	1	-1	0	0
E9PD53;Q9NTJ3;Q9NTJ3-2	0	0	0	0	0	0.576021	-0.400548	0	0	-0.175474	0
E9PD68;Q14194;Q14194-2	0.218825	0	0	0	0.344856	0	0	0	-1	0	0.436319
E9PDE8	0	0	0	0	-0.162236	0	0	-0.363582	0.525818	0	0
E9PDN4
E9PEF1;O00408;O00408-3;O00408-4	0	0	0	0	0	0	0	0	0	0	0
E9PEJ6;H0Y547;P98196	0	0.267801	0	0	0	-0.220125	0	0	0	0	-0.0476752
E9PEP6;O14786	0	0.0302473	0	0	0	0	0	0	0	0	-0.0302473
E9PEQ6	0.490395	0	0.254978	0	-0.447702	0	0	-0.297671	0	0	0
E9PER6;O15530;O15530-2;O15530-3	0	0	0	0	0	0	0	0	0	0	0
E9PEW8	0.589327	0	-0.589327	0	0	0	0	0	0	0	0
E9PEX6;P09622	0	0	0	0	0	0	-0.318051	0	0	0.318051	0
E9PF10;O75694	0	0	0	0	0	0	0	0	0	0	0
E9PF16;Q96CM8;Q96CM8-2;Q96CM8-3	0	0	0	0	0	0	0	0	0	0	0
E9PF19;Q96E41;Q9Y4P3	0	0	0	0	0	0	0	0	0	0	0
E9PFK5;P78316;P78316-2	0	0	0	0	0	0	0	0	0	0	0
E9PFK9;Q9UJ41;Q9UJ41-3;Q9UJ41-4	0	0	-0.336706	-0.663294	0	0	0	1	0	0	0
E9PFR3;Q14738;Q14738-2;Q14738-3	0	0	0	-0.305153	0	0	0	0	0.305153	0	0
E9PFR9;J3KQJ8;Q96N96;Q96N96-2;Q96N96-3;Q96N96-5;Q96N96-6	0	0	0	0	0	0	0.209214	0	0	-0.209214	0
E9PG19;O94868;O94868-2	0	0	0	0	0.527336	0	0	0	-1	0	0.472664
E9PG32;Q6ZR08	-1	0	0	1	0	0	0	0	0	0	0
E9PG40;P05067;P05067-11;P05067-7;P05067-8;P05067-9	-0.310252	-0.689748	0	0	0	1	0	0	0	0	0
E9PG71;P54764;P54764-2	0.26816	0	0	0	0	-0.283604	-0.381505	0	0	0.73184	-0.334891
E9PG73;Q13427	0	0	0	0	0	0	0	0	0	0	0
E9PGC0;P20936;P20936-2;P20936-4	0	0	0	0	0	0	0	0	0	0	0
E9PGM7;O94988;O94988-1;O94988-3;O94988-5;O94988-6	0	0	0	1	0	0	0	-1	0	0	0
E9PGQ0;Q96H78	0	0	0	0	0	0	0	0	0	0	0
E9PGT3;Q15418;Q15418-2;Q15418-4	0	0	0	0	0	0	0	0	0	0	0
E9PGT6;Q99627	0	0	0	0.161449	0	0	0	0	-0.161449	0	0
E9PHI4;O94901-9	0.470667	0	-0.451994	0	0	0	0	0	0	0.240019	-0.258692
E9PHR9;Q9NRQ2;Q9NRQ2-2	0	0	-0.503068	0	0.404039	0	0	0	0	0	0.0990292
E9PHT3;Q8IYS0;Q8IYS0-2
E9PHV5;P28290	0	0	0.0113783	0	0	0	-0.0416941	0	0	0	0.0303158
E9PHX8;H7C3L9;Q12866	0	0	0	0	0	-0.449007	0.486738	0	0	0	-0.0377308
E9PHY5;O43491-4	0	0	0	0	0	0	-0.497522	0	0	0	0.497522
E9PHY8;Q8NDA8	0	0	0	0	-0.193373	0	0	-0.173557	0.36693	0	0
E9PI41	0	0	0	0	0	0	0	0	0	0	0
E9PI92	0	0	0	0	-0.499154	0	0	0	0	0.499154	0
E9PIC5;Q8N4M1-4;Q8N4M1-5;Q8N4M1-6	0	0	1	0	0	0	-1	0	0	0	0
E9PIF4;Q99519	0	0.324281	0	0	0	0.239354	-0.782232	0	0	0	0.218598
E9PIG5;O00212
E9PIH9;F8WA39;H0YDX3;Q13613;Q13613-2;Q8NEC6	-1	0	0	0	0	0	0	0	0	0.708846	0.291154
E9PIZ2;H0YDB8;Q8N3Y3	-0.564064	0	0	0	0.564064	0	0	0	0	0	0
E9PJ55;Q9NUJ3	0	0	0	0	0	0	0	0	0	0	0
E9PJE4;Q9GZQ3	0	0	1	0	-0.716396	0	0	-0.283604	0	0	0
E9PJI1;Q92993;Q92993-2;Q92993-3;Q92993-4	0	0	0	0	0	0	0	0	0	0	0
E9PJJ5;E9PK99;E9PMS5;E9PRT1;Q4G0X4	0	0	0	0.0477502	0	0	0	0	-0.0477502	0	0
E9PJN9	0	-0.648746	0	0	0	0	0	0	0	0.648746	0
E9PJQ3;Q8N413;Q8N413-4	0	0	0	0	0	0	0	0	0	0	0
E9PJW8;E9PQA6;Q96EY5;Q96EY5-2;Q96EY5-3	1	0	0	0	-0.511997	0	0	-0.488003	0	0	0
E9PK25;G3V1A4;P23528	0	0	0	0	0	0	0	0	0	0	0
E9PK67;E9PNI7;Q53GL7	0	0	0	0	0	0	0	0	0	0	0
E9PK91;Q9NYF8;Q9NYF8-2;Q9NYF8-3	0	0	0	0	0	0	0	0	0	0	0
E9PKA8;E9PQL5;E9PSC8;Q6ZUT1;Q6ZUT1-2;Q6ZUT1-3	0	0	0.349545	0	-0.258527	-0.0910187	0	0	0	0	0
E9PKC0;Q6IQ23;Q6IQ23-2	0	0	0.38307	0	0	-0.0568417	0	0	0	-0.272862	-0.0533669
E9PKE9;G3V148;Q9H920;Q9H920-2
E9PKF6;H7BXH2;Q5H9R7;Q5H9R7-2;Q5H9R7-5;Q5H9R7-6	0	0	0	0	0	0	0	0	0	0	0
E9PKG1;Q99873;Q99873-2;Q99873-3
E9PKN0;E9PQ01;O94913	0	0	1	0	-0.550681	0	0	-0.449319	0	0	0
E9PKP7;P17480-2	0	0	0	0	0	0	0	0	0	0	0
E9PKP8;E9PS00;H0YCN1;H0YED5;Q9Y5Q0	0.241306	0.429355	0	0	-0.670662	0	0	0	0	0	0
E9PKS9;E9PQE8;Q9Y296;Q9Y296-2
E9PKT4;Q8N131;Q8N131-2	0	0	0	0	0.129195	0	0	-0.129195	0	0	0
E9PKT9;O96033	0	0	0	0	0	0	0	0	0	0	0
E9PL17;Q92989;Q92989-2	0	0	1	0	0	0	0	0	-1	0	0
E9PL57	0	0	0	0	0	0	0	0	0	0	0
E9PLD0;Q9H0U4
E9PLI6;E9PNH5;E9PS76;Q8N9N8
E9PLK3;P55786	0	0	0	0	0	0	0	0	0	0	0
E9PLN8;F8W9H0;I3L3B4;Q9BQB6;Q9BQB6-2;Q9BQB6-3	0	1	0	0	-0.64503	-0.35497	0	0	0	0	0
E9PLP8;Q12996	0	0	-0.264133	0	0	0	0	0	0	0.264133	0
E9PLY5	0.24226	0	0	0.112643	0	0	0	0	-0.354903	0	0
E9PM19;P29597	0	0	0	0	0	-0.419862	0	0	0	0	0.419862
E9PM62;Q5T9L3;Q5T9L3-2	0	-0.288548	0	0	0	0	0	0	0	0.28297	0.00557791
E9PM75;Q9NTG7	0	0	0	0	0	0	0	0	0	0	0
E9PM90;Q9UK41;Q9UK41-2	0	0	0	0	0	0	0	0	0	0	0
E9PMB9;Q16798	0	0	0.584846	0	-0.355908	0	0	0	0	0	-0.228938
E9PMG5	0	0	0	0	0	0	0	0	0	0.112095	-0.112095
E9PMI6;J3KN38;P54105	0	0	0	-0.574443	0	0	0	1	-0.425557	0	0
E9PMJ1;E9PS06;Q15771	-0.508252	1	0	0	-0.491748	0	0	0	0	0	0
E9PMJ5	0	0	0	0	0	0	0	0	0	0	0
E9PMQ6;Q00613;Q00613-2	1	0	0	0	0	0	0	0	-1	0	0
E9PMR4;K4DIA7;P48509	0	0.531045	0	0	0	-0.417452	0	0	0	0	-0.113592
E9PMS6	0	0	-0.160181	0	0	0	0.42503	0	0	-0.576445	0.311595
E9PN76;Q8ND24;Q8ND24-2
E9PN78;Q4KMG0;Q4KMG0-2
E9PN89
E9PNE5;Q9H1C4	-1	0.718269	0	0	0	0	0	0	0	0	0.281731
E9PNL8;Q13574;Q13574-1;Q13574-3;Q13574-4;Q13574-5;Q13574-6;Q13574-7
E9PNP3;E9PR47;Q9H7C9	0	0	0	0	0	0	0	0	0	0	0
E9PPF6	0.313513	0	0	0	0	-0.358012	0	0	0	0	0.0444983
E9PPQ1;J3KNE7;Q16890;Q16890-5	-0.044287	0	0	0.044287	0	0	0	0	0	0	0
E9PPZ9;O43292;O43292-2	0	0	0	0	0	0	0	0	0	0	0
E9PQ59;Q6P4R8;Q6P4R8-2;Q6P4R8-3	0	0	-0.352896	0	0	0	0	0	0	0.352896	0
E9PQ73;Q8TDW7;Q8TDW7-1	0	0	0	0.10737	0	0	0	0	-0.10737	0	0
E9PQC9	0	0	0	0	-0.573911	0.573911	0	0	0	0	0
E9PQD7;P15880	0	0.39278	0	0	0	0	0.267288	0	0	-0.660068	0
E9PQM8;E9PRF4;Q15047;Q15047-3	0	0	0	-1	0.480674	0	0	0.519326	0	0	0
E9PQY2;Q9NQP4	0	0	0	0	0	0	0	0	0	0	0
E9PQZ2;Q11206;Q11206-2;Q11206-3;Q11206-4;Q11206-5;Q11206-6;Q11206-7	0	0	0.453869	0	-0.453869	0	0	0	0	0	0
E9PR30;P62861	0	-0.507496	0	0	0	0	0.422813	0	0	0.084683	0
E9PR76;E9PSH4;Q9H063	0	0	0.244868	0	0.321732	0	0	0.433401	-1	0	0
E9PR92	0.353922	0	0.230161	0	-0.197782	0	0	0	0	0	-0.386301
E9PRP3	0	0	0	0	0	0	0	0	0	0	0
E9PRQ7;Q04323	0	0	0	0.326366	0	0	0	0	-0.326366	0	0
E9PRU1;O95967	0	0	0	-1	0	0	0	0	1	0	0
E9PS41;Q6RFH5;Q6RFH5-2	0	0	-0.532001	0	0	0	0	0	0	0	0.532001
E9PS44;Q01628	0	0	0	0	0	1	0	-1	0	0	0
E9PSA5;Q96Q83
E9PSI1	0	0	0	0	0	0	0	0	0	0	0
ENSEMBL:ENSBTAP00000001528	0	0	0	0	0	-1	0.479848	0	0	0	0.520152
ENSEMBL:ENSBTAP00000007350	0.65165	-0.65165	0	0	0	0	0	0	0	0	0
ENSEMBL:ENSBTAP00000024146	0.310764	-0.310764	0	0	0	0	0	0	0	0	0
ENSEMBL:ENSBTAP00000024462;ENSEMBL:ENSBTAP00000024466	0	0	0	0	0	-0.197696	0.100199	0	0	0.308193	-0.210696
ENSEMBL:ENSBTAP00000038329;REFSEQ:XP_001252647	0	0	0	0	0.460635	-0.460635	0	0	0	0	0
F2Z2H4;J3KPC0;Q5VVY4;Q86XD8	0	0.59966	0	0	-0.59966	0	0	0	0	0	0
F2Z2J1;Q15349;Q15349-2;Q15349-3	0	0	1	-0.586608	0	0	0	0	-0.413392	0	0
F2Z2U4;H0Y4W2;Q9Y4A5;Q9Y4A5-2	-0.220703	0	0.220703	0	0	0	0	0	0	0	0
F2Z2W7;Q8IZ69;Q8IZ69-2	0	0	0	0	0	0	0	1	-1	0	0
F2Z2X4;Q9C0E2
F2Z2X9	0	-0.218998	0	0	-0.0602041	0.279202	0	0	0	0	0
F2Z357;J3KPC5;P47736;P47736-4
F2Z3K0	0	0	0	0	1	0	0	0	-1	0	0
F5GWB9;I3L1L5;I3L2B9;I3L4D7;I3L4R7;I3L517;Q8NHS9;Q8NHS9-2;Q8NHS9-3	0	0	-0.304603	0	0	0	0	0	0.75374	-0.449137	0
F5GWI0;F5H2L3	0	0	0	-0.527773	0.613312	0	0	0.386688	-0.472227	0	0
F5GWI4;P00813	0	0	1	-1	0	0	0	0	0	0	0
F5GX19;F5H3Y3;Q6IAA8	0	-1	0	0	0	1	0	0	0	0	0
F5GX23;F5H5V4;J3KN29;O00233;O00233-2	0	0	0	0.0464494	0	0	0	0	-0.0464494	0	0
F5GX26;Q7Z3Z4;Q7Z3Z4-2;Q7Z3Z4-3	0	0	0	0	0	0	1	-1	0	0	0
F5GXC5;H3BUJ1;Q8TB96	0	0	0	0	0.028269	0	0	-0.028269	0	0	0
F5GXJ1;F5H5N1;O75251;O75251-2	0	0	0	0	0	0	0	0	0	0	0
F5GXW5;Q99622	1	0	-0.29985	-0.70015	0	0	0	0	0	0	0
F5GXX5;P61803	0	0.613007	0	0	0	0	0	0	0	-0.613007	0
F5GXX6;F5H271;Q9NQ89	0	0	0	0	-0.365986	0	0	0.365986	0	0	0
F5GY03;P09486	0	-0.166691	0	0	0	0.250168	0	0	0	0	-0.0834767
F5GY80;F5H7G1;P07358	0	0	0	0	0	0	0	0	0	0	0
F5GYJ5;Q9NX18	0	0	0	0	0	-0.275381	0	0	0	0.275381	0
F5GYK2;Q9NRL3;Q9NRL3-3
F5GYQ1;P61421	1	-1	0	0	0	0	0	0	0	0	0
F5GYQ6;H7C1B8;H7C499;Q96HL8;Q96HL8-2;Q96HL8-3;Q96HL8-4;S4R3I7	0	0	-0.428106	0	1	-0.571894	0	0	0	0	0
F5GYQ7	0.579313	0	0	-1	0	0	0	0.420687	0	0	0
F5GZ54	0	0	0.514401	0	0	0	0	0	0	-0.514401	0
F5GZ97;Q9Y3C0
F5GZG1	-0.304262	0	0.341098	0	0	-0.352215	0	0	0	0	0.315379
F5GZQ1	0	0	0	0	0	0	0	0	0	0	0
F5GZY7;Q9H0R8;Q9H0R8-2
F5H001;F5H7N8
F5H039;Q9NQX3;Q9NQX3-2	0	0	0	0.0104135	0	0	0	0	-0.0104135	0	0
F5H0C4;Q9BRP4;Q9BRP4-2	0	0	0	0	0	0	0	0	0	0	0
F5H0F9;Q9UJX4;Q9UJX4-3	0	0	-0.128363	0	0	0	0	0	0.128363	0	0
F5H0R1;H3BRB1;Q9H6E5
F5H0U5;Q9NZD2	0	0	0	0	0	0	0	0	0	0	0
F5H101;F8WE42;Q76FK4;Q76FK4-4	0	0	0	0	0	0	0	0	0	0	0
F5H116	0	0	-0.316653	0	0	0.561006	-0.337226	0	0	0.0928736	0
F5H157;Q15286	-1	0.689302	0	0	0	0	0	0	0	0	0.310698
F5H199;F5H7C4;Q8IXL7-2	0	0	0	0	0	0	0	0	0	0	0
F5H1R2;Q8IY45;Q8IY45-2
F5H1R4;K7EM85;K7ES92;K7ES98;Q92619;Q92619-2
F5H1S1;Q92521	0	1	-0.441901	0	-0.558099	0	0	0	0	0	0
F5H1U9;O75970;O75970-3
F5H1Z6;Q9Y365	0	0	0	0	0	0	0	0	0	0	0
F5H265	0	0	0	0	0	-0.479028	0.521015	0	0	0.478985	-0.520972
F5H269;Q9Y485
F5H2B9;H0YNH8;Q9BZF9;Q9BZF9-2
F5H365;Q15436	0	0	0	0	-0.192211	0	0	-0.240238	0.432449	0	0
F5H369;O75747	0	0	0	0	0	0	0	0	0	0	0
F5H3G9;F5H4N6;Q9Y3R0;Q9Y3R0-2;Q9Y3R0-3	0	0	0	0	0	0	0	1	-1	0	0
F5H3Y4;Q8IY37	0	0	-0.532057	0	0	0	0	0	0	0.2464	0.285657
F5H442;Q99816	0	0	0	0	0	0	0	0	0	0	0
F5H459;Q92572
F5H4F1;Q99638	0	0	0	1	0	0	0	0	-1	0	0
F5H4R1;F5H538;J3KNB8;Q9Y6R4;Q9Y6R4-2	0	0	0	0	0	0	0	0	0	0	0
F5H4X9	0	0	0	0	0	0	0	0	0	0	0
F5H523;Q9P2K6	0	0	0	0	0	0	0	1	-1	0	0
F5H5A3;Q8IVH8;Q8IVH8-2;Q8IVH8-3	0	0	-1	0	0.50256	0	0	0	0	0	0.49744
F5H5I6;H0Y8R1;H0YAK1;Q12849	0	0	0	0	0	0	0	0	0	0	0
F5H5P2;P12694	0	0	0	0	0	0	0	0	0	0	0
F5H5R8;P18440	0	0	0	0	0	0	0	0	0	0	0
F5H5T5;Q7Z3V4
F5H619;Q86XA9;Q86XA9-2	0	0	0	0	0	0	1	0	-1	0	0
F5H658;Q14562	0	0	0.307795	0	-0.239624	-0.221609	0	0	0	0	0.153438
F5H6Q1;J3KR44;Q96FW1	0	0	0	0	0	0	0	0	0	0	0
F5H6U7;G3V1U5;Q9Y3E0	0	0.105275	0	0	-0.105275	0	0	0	0	0	0
F5H6Z0;Q00537;Q00537-2	0	0	0	-1	0.48031	0	0	0.51969	0	0	0
F5H702;Q96GC5;Q96GC5-3	0	0	0	0	0	0	0	0	0	0	0
F5H760	0	0	-0.367904	0	0	-0.298297	0	-0.333799	0.500801	0.499199	0
F5H785;P0DI81;P0DI81-3;P0DI82
F5H7I0;Q8NC69	0	0	0	0	0.506589	0	0	0	-0.506589	0	0
F5H7I4;H9ZYI9;Q06547;Q06547-2;Q06547-3;Q06547-4	0	0	-0.381392	0	0	0	0	0	0	0	0.381392
F5H7J9;H0YGW5;O75581	0.159641	0	0	0	0	-0.311392	0	0	0	0	0.151751
F5H7P7;Q96BP3
F5H7S3	0	0	-0.394435	0	0	0	0.394435	0	0	0	0
F5H7V9;J3QSU6;P24821;P24821-2;P24821-3;P24821-4	0	0	0	0	0	0	0	0	0	0	0
F5H8F7;Q9UBL3;Q9UBL3-3	0	0	0	0	0	0	0	0	0	0	0
F5H8H2;Q03426	0	0	0	0	0	0	0	0	0	0	0
F6M2K2;F6M2K4;Q14686	0	0	0	0	0	0	0	0	0	0	0
F6QDS0;I3L0H8;Q9NUU7	0	0	0	0	0	0	0	0	0	0	0
F6QTA4;Q5JQZ9;Q9BWU1;Q9BWU1-2	0	0	0	0	0	0	0	0	0	0	0
F6RY50;Q96FS4	0	0	0	0	0	0	0.0418562	0	0	-0.0418562	0
F6SDV2;Q9GZM7;Q9GZM7-3	-0.36651	0	0.349498	0	0	0.234733	0	0	0	0	-0.217721
F6SFZ6;Q99571;Q99571-2;Q99571-3	0	1	0	0	0	0	0	0	0	0	-1
F6TB26;Q5SZR4;Q9Y2W6	0	0	0	0	0	0	0	0	0	0	0
F6UJY1;J9JIE9;Q5T013	0	0	0	0	0	0	0	0	0	0	0
F6VRR5;Q9BY77	0	0	0	0	0	0	0	0	0	0	0
F6VZ39;H0YA61;Q9BX46;Q9H0Z9;Q9H0Z9-2	0	0	-0.518058	0	0.518058	0	0	0	0	0	0
F6XA08;Q5VYX0;Q5VYX0-2	0	0	0	0	0	-0.483619	0.463261	0	0	0.536739	-0.516381
F6XHT0;Q9Y6D0	0	0	0	0	0	0	0	0	0	0	0
F6XZD3;Q8N283	0	0	0	0	0	0	0	0	0	0	0
F8VP71;Q6P1Q0;Q6P1Q0-2;Q6P1Q0-4;Q6P1Q0-7	0	0	0	0	0	0	0	0	0	0	0
F8VPD4	0	0	0	0	0	0	0	0.332639	-0.332639	0	0
F8VPN1;F8VQE3;F8VRQ9;F8VUB3;F8VWP8;F8VXS2;F8VZI3;F8W0X2;Q9P1Z2;Q9P1Z2-2;Q9P1Z2-3	0	0	0	0.718198	0.281802	0	0	0	-1	0	0
F8VQD9;F8VVA0;Q9BSB4	0	0	0	-0.322817	0	0	0	0	0.322817	0	0
F8VQR7;F8VW96;Q16527	-1	0.376421	0	0	0	0	0.383084	0	0	0	0.240495
F8VRE8;Q96HH6;Q96HH6-2	0	0	0	0	0	0	0	0	0	0	0
F8VRX1;O95398;O95398-2;O95398-3
F8VS61	0	0	0.290544	0	0	0	0	0	0	-0.55892	0.268376
F8VTY2;Q8NFH4	0	0	0	0	0	0	0	0	0	0	0
F8VU90;Q9NYL4;Q9NYL4-2	0	-0.0232449	0	0	0	0	0	0	0	0.0232449	0
F8VUB4;F8VV52;Q9NZN8
F8VUC5;F8VVA7;F8VXB1;F8VXR1;F8VYZ4;F8W156;P61923;P61923-4;P61923-5	0	0	0	0	0	0	0	0	0	0	0
F8VUF6;F8VWU0;F8VX58;F8VXZ8;P07585;P07585-4
F8VUJ3;Q8N4A0	0	0	0	0	0	0	0	0	0	0	0
F8VUY8;Q96QD8	-0.0869471	0	0	0	0.0869471	0	0	0	0	0	0
F8VV56;F8VWK8;F8W022;P08962;P08962-2;P08962-3	-0.283538	-0.716462	0	0	0	1	0	0	0	0	0
F8VVL1;O43583
F8VW50;Q2TAC6;Q2TAC6-2;Q2TAC6-3	-0.270187	0.684399	0	0	-0.414212	0	0	0	0	0	0
F8VWS0;P05388;P05388-2	0	-0.147268	0	0	0	0	0.239089	0	0	-0.0918212	0
F8VWT9;J3KPF0;Q9Y4D8;Q9Y4D8-4
F8VWW7;Q8NCJ5	0	0	0.488455	0	0	0	0	0	0	0	-0.488455
F8VWY2;Q9UBM8;Q9UBM8-2	-0.614	0	0	0	0	0	0	0	0.614	0	0
F8VWZ8;Q52LW3	0	0	0	0	0.247323	-0.261005	0	0.29515	-0.281469	0	0
F8VX10;F8VXI8;H0YIQ8;Q9H9L4	0	0	0	0	0	0	0	0	0	0	0
F8VXC8;Q8TAQ2;Q8TAQ2-2;Q8TAQ2-3	0	0	0	0	0	0	0	0	0	0	0
F8VXD5;Q53FV1	0	-0.677069	0.602508	0	0.397492	0	0	0	0	0	-0.322931
F8VXH0;J3KQA0
F8VXY6;G3V1V1;Q8TBF4	0	0	0.632623	0	0	-1	0	0	0	0	0.367377
F8VYE8;P36873;P36873-2	0	0	0	0	0	0	0	0	0	0	0
F8VZA0;Q9H0K6	0	0	0	0	0.502812	0	0	0	0	-0.502812	0
F8W038;Q8IXM2;Q8IXM2-3
F8W0A2	-0.646608	0	0	0	0.356412	-0.353392	0	0.226761	0.416827	0	0
F8W0A3	0	0	-0.752865	0	0	0	0	0	0.752865	0	0
F8W0Q9;Q8NEY8-2;Q8NEY8-8;Q8NEY8-9	0	0	0	0	0	0	0	0	0	0	0
F8W0U9;Q149M9;Q149M9-3	-0.53736	0	0	0.679783	0	0	0	0	0	0	-0.142423
F8W111;P14384	0	0.393414	0	0	0	-0.136397	0	0	0	0	-0.257017
F8W1A4;P54819;P54819-2	0	0	0	0	0	0	-0.257232	0	0	0.257232	0
F8W1B3	0	0	0	0	0	0	0	0	0	0	0
F8W1C3;Q99542	-0.214845	0.562196	0	0	0	-0.39422	0	0	0	0	0.0468697
F8W1R9;P36897;P36897-2;P36897-3	0	0	0	0	0	0	0	0	0	0	0
F8W6G1;Q9UHY1	0	0	0	0	0	0	0	0	0	0	0
F8W6M3;H0Y6A5;Q9NYG2;Q9NYG2-2	0	0	0	0	0	0	0	0	0	0	0
F8W6W2	-1	0	0	0	0.462525	0	0	0.199515	0.33796	0	0
F8W703;Q9HCK4;Q9HCK4-2;Q9HCK4-3;R4GMM8	0.477107	0	-0.347551	0	0	-0.265209	0	0	0	0	0.135653
F8W726
F8W727;P62910	0	-0.102896	0	0	0	0	0	0	0	0.102896	0
F8W775	-0.0256261	0	0	-0.603968	0.340678	0	0	0.288916	0	0	0
F8W776;Q8TC24;Q9H9S3;Q9H9S3-2;Q9H9S3-3	0	0	0	0	0	0	0.348722	0	0	-0.348722	0
F8W7A7;J3KSU3;Q5BJE1;Q5BJE1-2;Q5BJE1-3;Q5BJE1-4	0	0	0	0	0	0	0.571195	0	0	-0.571195	0
F8W7L6;P42262;P42262-2;P42262-3;P42262-4
F8W7Q2	0	0	0.311086	0	-0.311086	0	0	0	0	0	0
F8W7Q4;Q96A26	0	0	0	0	0	0	0	0	0	0	0
F8W7S5	0	0	0	0	0	0	0	0	0	0	0
F8W7T1;Q92784-3	0	0	0	-0.580017	0	0	0	0	0.580017	0	0
F8W876;P48740;P48740-2;P48740-3;P48740-4	0	0.548316	0	0	0	-0.488053	0	0	0	0	-0.0602628
F8W8H5;Q969Q5	0	0.47612	0	0	0	0	-0.47612	0	0	0	0
F8W930;Q9Y6M1;Q9Y6M1-1;Q9Y6M1-3;Q9Y6M1-4;Q9Y6M1-5;Q9Y6M1-6
F8W9E7;Q96BJ8;Q96BJ8-2;Q96BJ8-3
F8W9J4;Q03001	0	0	0.0537779	0	0	0	-0.0537779	0	0	0	0
F8W9Q8;G3V426;Q86TW2;Q86TW2-2	0	0	0	0	0	0	0.322607	0	0	-0.322607	0
F8W9X7;Q567U6	0	0	0	0	0.0160686	0	0	-0.0160686	0	0	0
F8WA11;Q7Z460;Q7Z460-2;Q7Z460-3;Q7Z460-4;Q7Z460-5	0	0	0	0	0	0	0	0	0	0	0
F8WAJ0;Q9H8H2;Q9H8H2-2;Q9H8H2-4	0	0	0	0	0	0	0	0	0	0	0
F8WB95;G3V0G5;Q8IV38	-0.262561	0	0	0.262561	0	0	0	0	0	0	0
F8WBF9;Q5TH30;Q9UGV2;Q9UGV2-2;Q9UGV2-3	-1	0	0	1	0	0	0	0	0	0	0
F8WBJ6;Q9NRX1	0	0	-0.768503	0	0	0	0	0	0.443335	0	0.325168
F8WBQ5;F8WDJ7;Q03938	0	0	0	0	0	0	0.712476	0	0	-0.368028	-0.344448
F8WBW1;F8WC41;Q86X83;Q86X83-2
F8WC62;Q96KD3;Q96KD3-2
F8WCX2;H0Y5I5;Q8N1G0;Q8N1G0-2	-0.160852	0	0.282813	0	0	-0.517367	0	0	0	0	0.395407
F8WDE4;Q9NP87;Q9NP87-2	-0.540479	0	0	0	0.540479	0	0	0	0	0	0
F8WDT6;H7C2C9	0.664069	0	0	0	-0.385443	0	0	-0.278626	0	0	0
F8WDV0;Q9UI26;Q9UI26-2	0	0	0	-0.394046	0	0	0	0	0.394046	0	0
F8WDW2	0.563228	0	-1	0	0	0	0	0	0	0	0.436772
F8WJN3;Q16630;Q16630-2;Q16630-3	0	0	0	0	0	0	0	0	0	0	0
G3V0I5;P49821;P49821-2	0	0	0	0	0	0	0	0	0	0	0
G3V145;Q8N3Y7;Q8N3Y7-2	0	0	0	0	0	0	0	0	0	0	0
G3V150;O94766;O94766-2	0	0	0	0	-0.318539	0	0	0.318539	0	0	0
G3V169;P29466;P29466-2	0	0	0	0	0	0	0	0	0	0	0
G3V180;G3V1D3;Q9NY33	0	0	0	0	0	0	0	0	0	0	0
G3V1A6;P57764	0	0	0	0	0	0	0	0	0	0	0
G3V1B8;H0YEB6;O60232	0	0	0	0	0	0	0	0	0	0	0
G3V1C3;Q9BZZ5;Q9BZZ5-2	0	0	0	0	0	0	0	0	0	0	0
G3V1L9;Q07157	0	0	-0.195444	0	0	0	-0.327477	0	0	0.29453	0.228392
G3V1P2;Q8N584;Q8N584-2	0	0	0	-0.34655	0	0	0	0	0.34655	0	0
G3V1P3;Q969J3	0	-0.687809	0	0	0	1	0	0	0	0	-0.312191
G3V1R5;O43847;O43847-2	0	0	0	0	0	0	0	0	0	0	0
G3V1S3;Q6ZUT9;Q6ZUT9-2	0	0	0	0	0	0	0	0	0	0	0
G3V1Y8;Q86U10;Q86U10-3	0	0	0	0	0	0	0	0	0	0	0
G3V200;H0YHK3;O75334;O75334-3;O75334-4;O75334-5;O75334-6
G3V203;H0YHA7;J3QQ67;Q07020;Q07020-2	0	-0.0122996	0	0	0	0	0	0	0	0.0122996	0
G3V229;G3V412;Q99675	0	-0.0713954	0	0	0.0713954	0	0	0	0	0	0
G3V2A2;G3V3I4;P25963	-1	0	0	0.685066	0	0	0	0	0.314934	0	0
G3V2D5;G3V2P5;Q07352	0	0	0	0	0	0	0	0	0	0	0
G3V2D8;Q68DK2;Q68DK2-2;Q68DK2-5	0	0	0	-0.58229	0	0	0	0	0.58229	0	0
G3V2S7	0	0	0	0	0	0	0.457532	0	-1	0	0.542468
G3V2U7;P07311	0	0	0	0	0	0	0	0	0	0	0
G3V2W1;Q9UK55
G3V3A4;Q13573	0	0	0	0	0	0	0	0	0	0	0
G3V3A5	0.239551	0	0.455006	0	0	-0.336293	0	0	0	0	-0.358265
G3V3L0	0	0	0	0	0	0	0	0	0	0	0
G3V3S1;Q8TBB7;Q96JK2;Q96JK2-2;Q96JK2-3	0	0	0	0	-0.273139	0	0	-0.309003	0.582141	0	0
G3V431;Q6NUP7	0	0	0	0	0	0	0	0	0	0	0
G3V470;G3V5X7;Q99973;Q99973-2
G3V4C1;P07910-2	0	0	0	0	0	0	0	0	0	0	0
G3V4E1;H0YJH4;P23743	0	0	0	0	-0.596503	0	0	0	0.596503	0	0
G3V4K3;Q9H9C1;Q9H9C1-2	0	0	0	0.462419	0	0	0	0.199032	-0.66145	0	0
G3V4P8;P60983	0	0	-1	1	0	0	0	0	0	0	0
G3V4T6	0	0	0	0	0	0	0	0	0	0	0
G3V4U0;Q9UBX5	0	0	0	0	0	0	0	0	0	0	0
G3V4W4;Q96EK6	0	0	0	0	0	0	0	0	0	0	0
G3V529;Q9GZR7;Q9GZR7-2	0	0	0	0	0	0	0	0	0	0	0
G3V583;Q8N128;Q8N128-2	0	-0.551537	0	0	-0.448463	0.520607	0	0	0	0	0.479393
G3V5N8;Q9HBF4;Q9HBF4-3	0	0	0	0	0	0	0	0	0	0	0
G3V5P5;Q9UPI3;Q9UPI3-2	0.0914889	0	0.29419	0	0	-0.375344	0	0	0	0	-0.0103347
G3V5T9;P24941	0	0	0	0	0	0	0	0	0	0	0
G3V5V3;O60524;O60524-3;O60524-4;O60524-5	0	-1	0	0	0	0	0.527602	0	0	0.472398	0
G3V5Z7;P60900	0	0	0	0	0	0	0	0	0	0	0
G3XAG1;Q96ME7;Q96ME7-2;Q96ME7-3	0	0	0.364195	0	0	0	0	0	0	0	-0.364195
G3XAI2;P07942	0	0	-0.194853	0	0	0	0.35423	0	0	-0.46258	0.303203
G3XAK1;P26927	0	0	0	0	0	0	0	0	0	0	0
G3XAL9;P55011;P55011-3	0	0	0	0	0	0	0	0	0	0.284505	-0.284505
G3XAN1;Q9NV88;Q9NV88-2;Q9NV88-3	0	0	0	0	0	0	0	0	0	0	0
G3XAN4;Q15629;Q15629-2	0	0.11583	0	0	0	0	0	0	0	-0.11583	0
G3XAN8;Q9Y5J9	0	0	0	0	0	0	-0.0530063	0	0	0.0530063	0
G5E953;Q13615;Q13615-2;Q13615-3	1	0	0	0	0	0	0	-1	0	0	0
G5E972	0	0	0	0	0	0	0	0	0	0	0
G5E975;Q12824-2	0	0	0	0	0	0	0	0	0	0	0
G5E994;Q5VW38;Q5VW38-2	0	0	0	0	-0.670249	0	0	0.254408	0.415842	0	0
G5E9C2;I3L4X3;Q15653;Q15653-2	0	0	0	0	0	0	0	0	0	0	0
G5E9C8;Q07889	0	0	0	0.306696	0	0	0	0	-0.306696	0	0
G5E9F7;M0R235;P11464;P11464-2;P11464-3;P11464-4	0	0	0	0	-0.221358	0	0	-0.349254	0.570612	0	0
G5E9G4;Q9ULT0;Q9ULT0-4	1	0	0	0	0	0	0	0	0	-0.630641	-0.369359
G5E9V5;G5E9W7;P82650	0	0	0	0	0	0	0	0	0	0	0
G5E9W3;Q9UKF6	0	0	0	0	0	0	0	0	0	0	0
G5E9Y3;Q8WWN8;Q8WWN8-2	1	0	0	0	-1	0	0	0	0	0	0
G5EA03;Q9UPQ0-3	0	0	-0.34134	0	-0.380022	0	0	0	0	0.721362	0
G5EA09;O00560;O00560-2;O00560-3
G5EA30;Q92879;Q92879-2;Q92879-3	0	0	0	0	0	0	0	0	0	0	0
G5EA36;P30260;P30260-2	0	0	0.418907	0	0	0	0	-0.418907	0	0	0
G8JLA1;Q8NBN7	0	0	0	0	0	0	0	0	0	0	0
G8JLA2;P60660-2
G8JLB3;Q9Y606;Q9Y606-2	0	0	0.228471	0	0	0	-0.547592	0	0	0.319121	0
G8JLB6;P31943	0	0	0	0	0	0	0	0	0	0	0
G8JLD3;Q8IUD2;X6RLX0
G8JLK1;Q9NZ43	0	0.312759	0	0	-0.312759	0	0	0	0	0	0
H-INV:HIT000292931	0	0	0.215773	0	0	0	0	0	0	-0.699734	0.483961
H0Y2M6	0	-0.70505	0	0	0.373012	0.626988	0	0	0	0	-0.29495
H0Y2P0;H0YD13;H0YE40;J3KN83;P16070;P16070-10;P16070-11;P16070-12;P16070-13;P16070-14;P16070-16;P16070-17;P16070-18;P16070-3;P16070-4;P16070-5;P16070-6;P16070-7;P16070-8	0	0	-0.400945	0	0.668732	-0.240949	0	0	0	0	-0.0268379
H0Y2V6;Q5SW79;Q5SW79-2;Q5SW79-3
H0Y2Y8;Q15942	0	0	0	0	0	0	0	0	0	0	0
H0Y354;Q6L9T8
H0Y368;O60762;Q5QPK2	0	0	0	0	0	0	0	0	0	0	0
H0Y3A3;Q5VWQ8;Q5VWQ8-5
H0Y3C5;J3KPD6;P08631;P08631-2;P08631-3;P08631-4	0	0	0.371706	0	-0.540354	0	0	0	0	0.628294	-0.459646
H0Y3U6;P51654;P51654-2;P51654-3	-0.358053	1	0	0	-0.641947	0	0	0	0	0	0
H0Y400	0	0	0	0	0	0	0	0	0	0	0
H0Y473;O75354;O75354-2;O75354-3	0.372621	-0.537293	0	0	0.164672	0	0	0	0	0	0
H0Y4E8;Q9Y2K2-8	0	0	0	0	0	0	0	0	0	0	0
H0Y4Q6;Q8WUA4	0	0	0	0	0	0	0	0	0	0	0
H0Y4R1;P12268	0	0	0	0	0	0	0	0.283818	-0.283818	0	0
H0Y4R5;Q5SNT2;Q5SNT2-2	0	0	-0.25328	0	0	0	0	0	0	0	0.25328
H0Y4U7;Q8IUA7	0	0	0	0	-1	1	0	0	0	0	0
H0Y4W0;Q9UBI1
H0Y4Z2;Q4VNC1;Q4VNC1-2;Q4VNC1-3	0.0206751	0	0	0	-0.703928	0	0	0	0	0.390767	0.292486
[truncated: 5,736 more rows]

## Sheet: E06_C
ProteinGroups	Genes	CC_Protein-Complex	CC_Nucleus	CC_LD	CC_Peroxisome	CC_ER	CC_Endosome	CC_Cytosol	CC_Mitochondria	CC_Golgi	CC_Lysosome	CC_PM		ProteinGroups	Genes	CC_Protein-Complex	CC_Nucleus	CC_LD	CC_Peroxisome	CC_ER	CC_Endosome	CC_Cytosol	CC_Mitochondria	CC_Golgi	CC_Lysosome	CC_PM		ProteinGroups	Genes	CC_Protein-Complex	CC_Nucleus	CC_LD	CC_Peroxisome	CC_ER	CC_Endosome	CC_Cytosol	CC_Mitochondria	CC_Golgi	CC_Lysosome	CC_PM
A0A024QZ33;K7EK40;K7EMD8;K7ERM9;Q9H0G5	NSRP1	0.483754	0	0	0	0	0	0	0	0.516246	0	0		A0A024QZ33;K7EK40;K7EMD8;K7ERM9;Q9H0G5	NSRP1	1	0	0	0	0	0	0	0	0	0	0		A0A024QZ33;K7EK40;K7EMD8;K7ERM9;Q9H0G5	NSRP1	0	0	1	0	0	0	0	0	0	0	0
A0A024QZW4;Q9H1N7	SLC35B3	0	0	0	0	0	0.208212	0	0	0.791788	0	0		A0A024QZW4;Q9H1N7	SLC35B3	0	0	0	0	0	0	0	0	1	0	0		A0A024QZW4;Q9H1N7	SLC35B3	0	0	0	0	0	0	0	0	1	0	0
A0A024QZX5;A0A087X1N8;A0A2R8YD12;P35237	SERPINB6	0	0	1	0	0	0	0	0	0	0	0		A0A024QZX5;A0A087X1N8;A0A2R8YD12;P35237	SERPINB6	0	0	0	0	0	0	1	0	0	0	0		A0A024QZX5;A0A087X1N8;A0A2R8YD12;P35237	SERPINB6	0	0	0	0	0	0	1	0	0	0	0
A0A024R3B9;E9PJL7;E9PNH7;E9PRA8;P02511	CRYAB	1	0	0	0	0	0	0	0	0	0	0		A0A024R3B9;E9PJL7;E9PNH7;E9PRA8;P02511	CRYAB	0	0	0	0	0	0.276122	0.723878	0	0	0	0		A0A024R3B9;E9PJL7;E9PNH7;E9PRA8;P02511	CRYAB	0	0	0	0	0	0	0.681421	0	0	0	0.318579
A0A024R4E5;Q00341	HDLBP	0	0	0	0	0	0	0	1	0	0	0		A0A024R3M2;A0A1B0GUD6;A0A1B0GWG7;A0A2R8Y5X2;J3KNL5;Q3KR37;Q3KR37-2;Q3KR37-3;Q3KR37-4	GRAMD1B	0	0	0	0	0	0	0	0	1	0	0		A0A024R3M2;A0A1B0GUD6;A0A1B0GWG7;A0A2R8Y5X2;J3KNL5;Q3KR37;Q3KR37-2;Q3KR37-3;Q3KR37-4	GRAMD1B	1	0	0	0	0	0	0	0	0	0	0
A0A024R571;Q9H4M9	EHD1	NaN	NaN	NaN	NaN	NaN	NaN	NaN	NaN	NaN	NaN	NaN		A0A024R4E5;Q00341	HDLBP	0	0	0	0	0	0	0	1	0	0	0		A0A024R4E5;Q00341	HDLBP	0	0	0	0	0	0	0	1	0	0	0
A0A024R5I4;O94956	SLCO2B1	0	0	0	0	0.419297	0	0	0	0	0.277834	0.30287		A0A024R571;Q9H4M9	EHD1	NaN	NaN	NaN	NaN	NaN	NaN	NaN	NaN	NaN	NaN	NaN		A0A024R571;Q9H4M9	EHD1	NaN	NaN	NaN	NaN	NaN	NaN	NaN	NaN	NaN	NaN	NaN
A0A024R6I7;P01009	SERPINA1	0	0	1	0	0	0	0	0	0	0	0		A0A024R5I4;O94956	SLCO2B1	0	0	0	0	0.630009	0	0	0	0	0	0.369991		A0A024R5I4;O94956	SLCO2B1	0	0	0	0	0.581505	0	0	0	0	0	0.418495
A0A024R7W5;A0A087WY31;A0A087X0Q1;Q7Z739	YTHDF3	0	1	0	0	0	0	0	0	0	0	0		A0A024R6I7;P01009	SERPINA1	NaN	NaN	NaN	NaN	NaN	NaN	NaN	NaN	NaN	NaN	NaN		A0A024R6I7;P01009	SERPINA1	NaN	NaN	NaN	NaN	NaN	NaN	NaN	NaN	NaN	NaN	NaN
A0A024RA52;P25787	PSMA2	1	0	0	0	0	0	0	0	0	0	0		A0A024R7E8;K7EMV4;K7EN05;K7EPC8;K7EQ44;P60002	ELOF1	0	0	0	0	0.616418	0	0	0	0.383582	0	0		A0A024R7E8;K7EMV4;K7EN05;K7EPC8;K7EQ44;P60002	ELOF1	0	0	0	0	0	0.29819	0	0	0.70181	0	0
A0A024RAC6;Q14241	ELOA	0	0	0	0	0	0	1	0	0	0	0		A0A024R7W5;A0A087WY31;A0A087X0Q1;Q7Z739	YTHDF3	0	0	0	0	1	0	0	0	0	0	0		A0A024R7W5;A0A087WY31;A0A087X0Q1;Q7Z739	YTHDF3	0	0	0	1	0	0	0	0	0	0	0
A0A024RBG1;Q9NZJ9-2	NUDT4B;NUDT4	0	0	0	0	0	0	1	0	0	0	0		A0A024RA52;P25787	PSMA2	1	0	0	0	0	0	0	0	0	0	0		A0A024RA52;P25787	PSMA2	1	0	0	0	0	0	0	0	0	0	0
A0A024RCG2;Q96BI1	SLC22A18	0	0	0	0	1	0	0	0	0	0	0		A0A024RAC6;Q14241	ELOA	0	0	0	0	0	0	0	0	1	0	0		A0A024RAC6;Q14241	ELOA	0	0.389733	0	0	0	0.288238	0	0	0.322029	0	0
A0A024RCN4;A0A087X2F1;B4DMT1;Q16670;Q16670-2	ZSCAN26	0	0.677675	0	0	0	0	0	0	0	0	0.322325		A0A024RBG1;Q9NZJ9-2	NUDT4B;NUDT4	0	0	0	0	0	0	1	0	0	0	0		A0A024RBG1;Q9NZJ9-2	NUDT4B;NUDT4	0	0	0	0	0	0	1	0	0	0	0
A0A024RCQ8;A0A0G2JH76;A0A0G2JHB6;A0A0G2JIU6;A0A0G2JK02;A0A0G2JKR3;A0A0G2JLA3;A0A0G2JLL3;A0A140T8X7;A0A140T9Y1;G8JLL2;Q9UMR5;Q9UMR5-2;Q9UMR5-3	PPT2;PPT2;PPT2;PPT2;PPT2;PPT2;ENSG00000254778;ENSG00000254875;PPT2;PPT2;PPT2;PPT2;PPT2;PPT2	0	0	0	1	0	0	0	0	0	0	0		A0A024RCG2;Q96BI1	SLC22A18	0	0	0	0	1	0	0	0	0	0	0		A0A024RCG2;Q96BI1	SLC22A18	0	0	0	0	1	0	0	0	0	0	0
A0A024RCR6;A0A0G2JK23;P46379;P46379-2;P46379-3	BAG6	0	0	0	0	0	0	1	0	0	0	0		A0A024RCN4;A0A087X2F1;B4DMT1;Q16670;Q16670-2	ZSCAN26	0	0.300155	0	0	0	0	0	0	0	0.312835	0.38701		A0A024RCN4;A0A087X2F1;B4DMT1;Q16670;Q16670-2	ZSCAN26	0	0	0	0	0	0	0	0	1	0	0
A0A044PY82	MISP3	0	0	0	0	0	0	0	0	0	0.407769	0.592231		A0A024RCQ8;A0A0G2JH76;A0A0G2JHB6;A0A0G2JIU6;A0A0G2JK02;A0A0G2JKR3;A0A0G2JLA3;A0A0G2JLL3;A0A140T8X7;A0A140T9Y1;G8JLL2;Q9UMR5;Q9UMR5-2;Q9UMR5-3	PPT2;PPT2;PPT2;PPT2;PPT2;PPT2;ENSG00000254778;ENSG00000254875;PPT2;PPT2;PPT2;PPT2;PPT2;PPT2	0	0	0	0	1	0	0	0	0	0	0		A0A024RCQ8;A0A0G2JH76;A0A0G2JHB6;A0A0G2JIU6;A0A0G2JK02;A0A0G2JKR3;A0A0G2JLA3;A0A0G2JLL3;A0A140T8X7;A0A140T9Y1;G8JLL2;Q9UMR5;Q9UMR5-2;Q9UMR5-3	PPT2;PPT2;PPT2;PPT2;PPT2;PPT2;ENSG00000254778;ENSG00000254875;PPT2;PPT2;PPT2;PPT2;PPT2;PPT2	0	0	0	0	0.644072	0	0	0	0	0.355928	0
A0A067XG54;Q8NB49;Q8NB49-2;Q8NB49-3;Q8NB49-4	ATP11C	NaN	NaN	NaN	NaN	NaN	NaN	NaN	NaN	NaN	NaN	NaN		A0A024RCR6;A0A0G2JK23;P46379;P46379-2;P46379-3	BAG6	0	0	0	0	0	0	1	0	0	0	0		A0A024RCR6;A0A0G2JK23;P46379;P46379-2;P46379-3	BAG6	0	0	0	0	0	0	1	0	0	0	0
A0A075B6F0;H7BXG6;M0R167;Q9H0D2;Q9H0D2-2	ZNF541	0	0	0	0	0	0	0	0	1	0	0		A0A044PY82	MISP3	0	0.432546	0	0	0	0	0	0	0	0	0.567454		A0A044PY82	MISP3	0	0	0	0.61512	0	0	0	0	0	0	0.38488
A0A075B6F9;Q9Y314	NOSIP	0	0	0	0	0	0.38768	0	0	0.61232	0	0		A0A067XG54;Q8NB49;Q8NB49-2;Q8NB49-3;Q8NB49-4	ATP11C	NaN	NaN	NaN	NaN	NaN	NaN	NaN	NaN	NaN	NaN	NaN		A0A067XG54;Q8NB49;Q8NB49-2;Q8NB49-3;Q8NB49-4	ATP11C	0	0	0	0	0	0	0	0	0	0	1
A0A075B6G3;A0A087WTU7;A0A087WV90;A0A5H1ZRP8;P11532;P11532-11;P11532-4	DMD	0	0	0	0.550964	0	0	0	0	0	0	0.449036		A0A075B6F0;H7BXG6;M0R167;Q9H0D2;Q9H0D2-2	ZNF541	0	0	0	0	0	0.250432	0	0	0.320211	0.429357	0		A0A075B6F9;Q9Y314	NOSIP	0.688929	0	0	0	0	0.311071	0	0	0	0	0
A0A075B6U9	TRAJ2	0	0	0	0	0	0	0	1	0	0	0		A0A075B6F9;Q9Y314	NOSIP	0	0	0	0	0	0	1	0	0	0	0		A0A075B6G3;A0A087WTU7;A0A087WV90;A0A5H1ZRP8;P11532;P11532-11;P11532-4	DMD	0	0	0	0.528445	0	0	0	0	0	0	0.471555
A0A075B6W5	TRAV23DV6	0	1	0	0	0	0	0	0	0	0	0		A0A075B6G3;A0A087WTU7;A0A087WV90;A0A5H1ZRP8;P11532;P11532-11;P11532-4	DMD	0	0	0	1	0	0	0	0	0	0	0		A0A075B6U9	TRAJ2	0	0.355986	0	0.265947	0	0	0	0.378067	0	0	0
A0A075B727;A0A075B728;P16284;P16284-2;P16284-3;P16284-4;P16284-5;P16284-6	PECAM1	1	0	0	0	0	0	0	0	0	0	0		A0A075B6U9	TRAJ2	NaN	NaN	NaN	NaN	NaN	NaN	NaN	NaN	NaN	NaN	NaN		A0A075B6W5	TRAV23DV6	NaN	NaN	NaN	NaN	NaN	NaN	NaN	NaN	NaN	NaN	NaN
A0A075B730;P58107	EPPK1	0	0.669742	0	0	0	0	0	0.330258	0	0	0		A0A075B6W5	TRAV23DV6	0	0	0.622563	0	0	0	0	0	0.377437	0	0		A0A075B727;A0A075B728;P16284;P16284-2;P16284-3;P16284-4;P16284-5;P16284-6	PECAM1	0	0	0	0	0	0.381877	0	0	0.618123	0	0
A0A075B749;A0A087WX83;Q5VU43;Q5VU43-3;Q5VU43-4	PDE4DIP	NaN	NaN	NaN	NaN	NaN	NaN	NaN	NaN	NaN	NaN	NaN		A0A075B727;A0A075B728;P16284;P16284-2;P16284-3;P16284-4;P16284-5;P16284-6	PECAM1	0.630057	0	0	0	0	0	0	0	0.369943	0	0		A0A075B730;P58107	EPPK1	0	0	0	0	0	0	0	0	0	0	1
A0A075B754;Q96QE3;Q96QE3-2	ATAD5	0	0	0	1	0	0	0	0	0	0	0		A0A075B730;P58107	EPPK1	0	0.455464	0	0	0	0	0	0.262507	0	0	0.282029		A0A075B749;A0A087WX83;Q5VU43;Q5VU43-3;Q5VU43-4	PDE4DIP	1	0	0	0	0	0	0	0	0	0	0
A0A075B773;K7ELY8;O00623	PEX12	0	0	0	0.385578	0	0	0	0.368948	0	0	0.245474		A0A075B749;A0A087WX83;Q5VU43;Q5VU43-3;Q5VU43-4	PDE4DIP	0	1	0	0	0	0	0	0	0	0	0		A0A075B754;Q96QE3;Q96QE3-2	ATAD5	0	0	1	0	0	0	0	0	0	0	0
A0A075B784;E9PEW0;K7ELR5;Q8IXW9;Q9P275	USP36	0	1	0	0	0	0	0	0	0	0	0		A0A075B754;Q96QE3;Q96QE3-2	ATAD5	0	1	0	0	0	0	0	0	0	0	0		A0A075B757;A0A075B762;A0A087WTQ0;A0A087WUR2;A0A087WVU4;A0A087WYI5;A0A087WZJ2;A0A087X002	NBPF14;NBPF10;NBPF14;NBPF14;NBPF14;NBPF14;NBPF14;NBPF10	0	0	0	0	0	0	0	0	0.458869	0	0.541131
A0A075B7B1;C9JIE4;O15061;O15061-2;O15061-3	SYNM	0	0	0	0	0	0	0	0	0.608961	0.391039	0		A0A075B773;K7ELY8;O00623	PEX12	0	0	0.563349	0	0	0	0	0	0	0	0.436651		A0A075B773;K7ELY8;O00623	PEX12	0	0	0	0.475034	0	0	0	0.524966	0	0	0
A0A075B7B5;B7ZM87;O75044	SRGAP2	0	0	0	0	0	0	1	0	0	0	0		A0A075B784;E9PEW0;K7ELR5;Q8IXW9;Q9P275	USP36	0	1	0	0	0	0	0	0	0	0	0		A0A075B784;E9PEW0;K7ELR5;Q8IXW9;Q9P275	USP36	0	0.756482	0	0	0	0	0	0	0	0	0.243518
A0A075B7F1;S4R3C0	IGHV3OR16-8;ENSG00000259680	0	0	1	0	0	0	0	0	0	0	0		A0A075B7B1;C9JIE4;O15061;O15061-2;O15061-3	SYNM	0	0	1	0	0	0	0	0	0	0	0		A0A075B7B1;C9JIE4;O15061;O15061-2;O15061-3	SYNM	0	0	0.652431	0	0	0	0	0	0	0.347569	0
A0A087WSV6;A0A087WSX8;A0A0B4J1W1;A0A0G2JLS4;A0A0G2JM99;A0A0G2JMY9;A0A0G2JNK9;A0A0G2JNM2;A0A0G2JNQ6;A0A0G2JNR3;A0A0G2JP64;A0A0G2JP80;A0A0G2JP96;A0A0G2JQ15;A0A0G2JQ44;A0A0G2JQ46;A8MVE2;D9IDM5;D9IDM6;F6RVM3;F6TER3;O75019;O75019-2;Q8N6C8;Q8N6C8-3;Q8NHL6;Q8NHL6-2;Q8NHL6-3;Q8NHL6-4;Q8NHL6-5	LILRB1;LILRB1;LILRB1;LILRB1;LILRA3;LILRA3;LILRB1;LILRB1;LILRB1;LILRB1;LILRB1;LILRB1;LILRA1;LILRB1;LILRB1;LILRB1;LILRB1;LILRB1;LILRB1;LILRB1;LILRB1;LILRA1;LILRA1;LILRA3;LILRA3;LILRB1;LILRB1;LILRB1;LILRB1;LILRB1	NaN	NaN	NaN	NaN	NaN	NaN	NaN	NaN	NaN	NaN	NaN		A0A075B7B5;B7ZM87;O75044	SRGAP2	NaN	NaN	NaN	NaN	NaN	NaN	NaN	NaN	NaN	NaN	NaN		A0A075B7B5;B7ZM87;O75044	SRGAP2	NaN	NaN	NaN	NaN	NaN	NaN	NaN	NaN	NaN	NaN	NaN
A0A087WSW7;A0A0B4J1V9;F6XU50;Q9NRZ9;Q9NRZ9-2;Q9NRZ9-3;Q9NRZ9-4;Q9NRZ9-5;Q9NRZ9-6	HELLS	0	0	0.533754	0	0	0	0	0	0.466246	0	0		A0A075B7F1;S4R3C0	IGHV3OR16-8;ENSG00000259680	0	0	0.317854	0.341454	0	0	0	0.340691	0	0	0		A0A075B7F1;S4R3C0	IGHV3OR16-8;ENSG00000259680	0	0	0	0.3498	0	0	0	0	0.6502	0	0
A0A087WSW9;A0A087WSY9;Q16881;Q16881-3;Q16881-4	TXNRD1	0	0	0	0	0	0	1	0	0	0	0		A0A087WSV6;A0A087WSX8;A0A0B4J1W1;A0A0G2JLS4;A0A0G2JM99;A0A0G2JMY9;A0A0G2JNK9;A0A0G2JNM2;A0A0G2JNQ6;A0A0G2JNR3;A0A0G2JP64;A0A0G2JP80;A0A0G2JP96;A0A0G2JQ15;A0A0G2JQ44;A0A0G2JQ46;A8MVE2;D9IDM5;D9IDM6;F6RVM3;F6TER3;O75019;O75019-2;Q8N6C8;Q8N6C8-3;Q8NHL6;Q8NHL6-2;Q8NHL6-3;Q8NHL6-4;Q8NHL6-5	LILRB1;LILRB1;LILRB1;LILRB1;LILRA3;LILRA3;LILRB1;LILRB1;LILRB1;LILRB1;LILRB1;LILRB1;LILRA1;LILRB1;LILRB1;LILRB1;LILRB1;LILRB1;LILRB1;LILRB1;LILRB1;LILRA1;LILRA1;LILRA3;LILRA3;LILRB1;LILRB1;LILRB1;LILRB1;LILRB1	0	0	0	0	0	0	0	0	1	0	0		A0A087WSV6;A0A087WSX8;A0A0B4J1W1;A0A0G2JLS4;A0A0G2JM99;A0A0G2JMY9;A0A0G2JNK9;A0A0G2JNM2;A0A0G2JNQ6;A0A0G2JNR3;A0A0G2JP64;A0A0G2JP80;A0A0G2JP96;A0A0G2JQ15;A0A0G2JQ44;A0A0G2JQ46;A8MVE2;D9IDM5;D9IDM6;F6RVM3;F6TER3;O75019;O75019-2;Q8N6C8;Q8N6C8-3;Q8NHL6;Q8NHL6-2;Q8NHL6-3;Q8NHL6-4;Q8NHL6-5	LILRB1;LILRB1;LILRB1;LILRB1;LILRA3;LILRA3;LILRB1;LILRB1;LILRB1;LILRB1;LILRB1;LILRB1;LILRA1;LILRB1;LILRB1;LILRB1;LILRB1;LILRB1;LILRB1;LILRB1;LILRB1;LILRA1;LILRA1;LILRA3;LILRA3;LILRB1;LILRB1;LILRB1;LILRB1;LILRB1	0	0	0	0	0	0	0	0	1	0	0
A0A087WSY1;O15146;O15146-2;O15146-3;Q5T0B5	MUSK	0	1	0	0	0	0	0	0	0	0	0		A0A087WSW7;A0A0B4J1V9;F6XU50;Q9NRZ9;Q9NRZ9-2;Q9NRZ9-3;Q9NRZ9-4;Q9NRZ9-5;Q9NRZ9-6	HELLS	1	0	0	0	0	0	0	0	0	0	0		A0A087WSW7;A0A0B4J1V9;F6XU50;Q9NRZ9;Q9NRZ9-2;Q9NRZ9-3;Q9NRZ9-4;Q9NRZ9-5;Q9NRZ9-6	HELLS	0	0	0	0	0	0	0	0	0.54412	0.45588	0
A0A087WSY5;Q96IY4	CPB2	0	0	0	0	1	0	0	0	0	0	0		A0A087WSW9;A0A087WSY9;Q16881;Q16881-3;Q16881-4	TXNRD1	0	0	0	0	0	0	1	0	0	0	0		A0A087WSW9;A0A087WSY9;Q16881;Q16881-3;Q16881-4	TXNRD1	0	0	0	0	0	0	1	0	0	0	0
A0A087WSZ7;A0A1B0GW84;D6RHE0;Q08493;Q08493-2;Q08493-3;Q08499;Q08499-10;Q08499-11;Q08499-2;Q08499-3;Q08499-4;Q08499-5;Q08499-6;Q08499-8;Q08499-9;Q32MM7	PDE4D;PDE4D;PDE4D;PDE4C;PDE4C;PDE4C;PDE4D;PDE4D;PDE4D;PDE4D;PDE4D;PDE4D;PDE4D;PDE4D;PDE4D;PDE4D;PDE4C	0	0	0	0	0	0	1	0	0	0	0		A0A087WSY5;Q96IY4	CPB2	0	0	0	0	0	0	0	0	0	1	0		A0A087WSY1;O15146;O15146-2;O15146-3;Q5T0B5	MUSK	0	0	0	0.412436	0	0	0	0	0.587564	0	0
A0A087WT18;Q96A73;Q96A73-2	KIAA1191	0	0	0	0	0	0	0	0.419011	0	0.260658	0.320331		A0A087WSZ7;A0A1B0GW84;D6RHE0;Q08493;Q08493-2;Q08493-3;Q08499;Q08499-10;Q08499-11;Q08499-2;Q08499-3;Q08499-4;Q08499-5;Q08499-6;Q08499-8;Q08499-9;Q32MM7	PDE4D;PDE4D;PDE4D;PDE4C;PDE4C;PDE4C;PDE4D;PDE4D;PDE4D;PDE4D;PDE4D;PDE4D;PDE4D;PDE4D;PDE4D;PDE4D;PDE4C	0	0	0.295308	0	0	0.2915	0	0	0.413192	0	0		A0A087WSY5;Q96IY4	CPB2	0	0	0	0	0.608024	0	0	0	0	0.391976	0
A0A087WT20;Q9NV06	DCAF13	0	1	0	0	0	0	0	0	0	0	0		A0A087WT18;Q96A73;Q96A73-2	KIAA1191	0	0	0.214904	0.42079	0	0	0	0.364306	0	0	0		A0A087WT18;Q96A73;Q96A73-2	KIAA1191	0	0	0.373163	0	0	0	0	0.365109	0.261728	0	0
A0A087WT23;A0A087WV67;O00124;O00124-3	UBXN8	0	0	0	0	0	0	0	0	1	0	0		A0A087WT20;Q9NV06	DCAF13	0	1	0	0	0	0	0	0	0	0	0		A0A087WT20;Q9NV06	DCAF13	0	0.796045	0	0	0	0	0	0.203955	0	0	0
A0A087WT34	MBD3	0	0	1	0	0	0	0	0	0	0	0		A0A087WT23;A0A087WV67;O00124;O00124-3	UBXN8	0	0	0	0	0.407987	0	0	0	0.248503	0	0.343511		A0A087WT23;A0A087WV67;O00124;O00124-3	UBXN8	0	0	0.386284	0	0	0	0	0	0.323459	0	0.290257
A0A087WT44	HMOX2	0	0	0.285835	0	0.714165	0	0	0	0	0	0		A0A087WT30;J3KN91;Q8N5I9	C12orf45	0	0	0	0	0	0	1	0	0	0	0		A0A087WT30;J3KN91;Q8N5I9	C12orf45	0	0	0.457497	0	0	0	0	0	0.542503	0	0
A0A087WT59;P02766	TTR	0	0	0	0	1	0	0	0	0	0	0		A0A087WT34	MBD3	0	0	0.234819	0	0	0.352926	0	0	0.412255	0	0		A0A087WT34	MBD3	0	0.297706	0.702294	0	0	0	0	0	0	0	0
A0A087WT84;Q9H9V9;Q9H9V9-2	JMJD4	1	0	0	0	0	0	0	0	0	0	0		A0A087WT44	HMOX2	0	0	0	0	1	0	0	0	0	0	0		A0A087WT44	HMOX2	0	0	0	0	0.69192	0	0	0	0	0.30808	0
A0A087WT87;P43003;P43003-2	SLC1A3	0	0	0	0	0	0.530812	0	0	0	0.469188	0		A0A087WT58;A6NES4	MROH2A	0.397253	0	0	0	0	0	0.602747	0	0	0	0		A0A087WT58;A6NES4	MROH2A	0	0	0	0	0	0.240717	0	0	0.759283	0	0
A0A087WT95;P49753	ACOT2	0	0	0	0	0	0	0	1	0	0	0		A0A087WT59;P02766	TTR	NaN	NaN	NaN	NaN	NaN	NaN	NaN	NaN	NaN	NaN	NaN		A0A087WT59;P02766	TTR	0	0	0	0	0.57937	0	0	0	0	0.42063	0
A0A087WTA5;E7ERK9;Q9UI10;Q9UI10-2;Q9UI10-3	EIF2B4	1	0	0	0	0	0	0	0	0	0	0		A0A087WT84;Q9H9V9;Q9H9V9-2	JMJD4	NaN	NaN	NaN	NaN	NaN	NaN	NaN	NaN	NaN	NaN	NaN		A0A087WT84;Q9H9V9;Q9H9V9-2	JMJD4	0	0	0.440312	0.559688	0	0	0	0	0	0	0
A0A087WTA8;P08123	COL1A2	0	1	0	0	0	0	0	0	0	0	0		A0A087WT87;P43003;P43003-2	SLC1A3	0	0	0	0	0	0.449551	0	0	0.249624	0	0.300825		A0A087WT87;P43003;P43003-2	SLC1A3	0	0	0.398184	0	0	0.291783	0	0	0.310034	0	0
A0A087WTJ6;O14627;P47902;P47902-2;Q99626	CDX1;CDX4;CDX1;CDX1;CDX2	0	0	0	0	0	0	0	0	1	0	0		A0A087WT95;P49753	ACOT2	0	0	0	0	0	0	0	1	0	0	0		A0A087WT91;A0A087WVF3;A0A087WXS9;A0A087X179;A0A087X1G2;A0A0G2JLM6;A0A0G2JMF6;A0A0G2JP35;A0A0G2JPY0;A6NDS4;A6NER0;B9A6J9;P0C7X1;Q6DHY5;Q6IPX1;Q8IZP1	TBC1D3F;TBC1D3D;TBC1D3I;TBC1D3E;TBC1D3K;TBC1D3B;TBC1D3B;TBC1D3L;TBC1D3K;TBC1D3B;TBC1D3F;TBC1D3L;TBC1D3H;TBC1D3G;TBC1D3C;TBC1D3	0	0	0	0	0	0	0	0	1	0	0
A0A087WTK0;A0A087WVC6;Q12913	PTPRJ	0	0	0	0	0	0	0	0	0	0.436931	0.563069		A0A087WTA5;E7ERK9;Q9UI10;Q9UI10-2;Q9UI10-3	EIF2B4	1	0	0	0	0	0	0	0	0	0	0		A0A087WT95;P49753	ACOT2	0	0.611452	0	0	0	0	0	0.388548	0	0	0
A0A087WTM1;Q9Y6N7;Q9Y6N7-2;Q9Y6N7-3;Q9Y6N7-4;Q9Y6N7-5;Q9Y6N7-6	ROBO1	0	0	0	1	0	0	0	0	0	0	0		A0A087WTA8;P08123	COL1A2	0	0.681038	0	0	0	0	0	0.318962	0	0	0		A0A087WTA5;E7ERK9;Q9UI10;Q9UI10-2;Q9UI10-3	EIF2B4	NaN	NaN	NaN	NaN	NaN	NaN	NaN	NaN	NaN	NaN	NaN
A0A087WTP3;Q92945	KHSRP	0	1	0	0	0	0	0	0	0	0	0		A0A087WTE4;A0A087WTF6;A0A087WV75;A0A087WVU1;A0A087WWD4;A0A087WWJ5;A0A087WX77;A0A087WZS4;A0A087X1V2;A0A0D9SF98;H7BYX6;P13591;P13591-1;P13591-3;P13591-4	NCAM1	0	0	0.182545	0	0	0	0	0.281818	0.242148	0	0.293488		A0A087WTA8;P08123	COL1A2	0	1	0	0	0	0	0	0	0	0	0
A0A087WTQ2;A0A3B3IT47;C9JGR9;E7EQ49;Q9Y2I8;Q9Y2I8-2;Q9Y2I8-3	WDR37	0.397672	0	0	0	0	0	0.602328	0	0	0	0		A0A087WTF0;A2A3K4;A2A3K4-2	PTPDC1	0	0	0	0	0	0.489342	0	0	0.510658	0	0		A0A087WTF0;A2A3K4;A2A3K4-2	PTPDC1	0	0	0	0	0	0.350641	0	0	0.355405	0	0.293954
A0A087WTS0;H0YJK8;P18283	GPX2	0	0	0	0	0	0	1	0	0	0	0		A0A087WTG8	SYN3	0	0	0	0	0	0	0	1	0	0	0		A0A087WTJ6;O14627;P47902;P47902-2;Q99626	CDX1;CDX4;CDX1;CDX1;CDX2	0.608638	0	0	0	0	0	0	0.391362	0	0	0
A0A087WTT2;Q5JWB9;Q96A57;Q96A57-2	TMEM230	0	0	0	0	0	0	0	0	1	0	0		A0A087WTJ6;O14627;P47902;P47902-2;Q99626	CDX1;CDX4;CDX1;CDX1;CDX2	0	0	0	0	0	0	0	0	1	0	0		A0A087WTK0;A0A087WVC6;Q12913	PTPRJ	0	0	0	0	0.339253	0	0	0	0	0.248179	0.412568
A0A087WTU3;Q9Y6I9	TEX264	NaN	NaN	NaN	NaN	NaN	NaN	NaN	NaN	NaN	NaN	NaN		A0A087WTK0;A0A087WVC6;Q12913	PTPRJ	0	0	0	0	0.473443	0	0	0	0	0	0.526557		A0A087WTM1;Q9Y6N7;Q9Y6N7-2;Q9Y6N7-3;Q9Y6N7-4;Q9Y6N7-5;Q9Y6N7-6	ROBO1	0	0	0	0	0	0	0	0	0	0.484048	0.515952
A0A087WTV6;A0A087WZR9;Q96C36	PYCR2	0	0	0	0.320748	0	0	0	0.679252	0	0	0		A0A087WTM1;Q9Y6N7;Q9Y6N7-2;Q9Y6N7-3;Q9Y6N7-4;Q9Y6N7-5;Q9Y6N7-6	ROBO1	0	0	0	0	0.534334	0	0	0	0	0	0.465666		A0A087WTP3;Q92945	KHSRP	0	1	0	0	0	0	0	0	0	0	0
A0A087WTY4;P49454	CENPF	0	1	0	0	0	0	0	0	0	0	0		A0A087WTP3;Q92945	KHSRP	NaN	NaN	NaN	NaN	NaN	NaN	NaN	NaN	NaN	NaN	NaN		A0A087WTQ2;A0A3B3IT47;C9JGR9;E7EQ49;Q9Y2I8;Q9Y2I8-2;Q9Y2I8-3	WDR37	NaN	NaN	NaN	NaN	NaN	NaN	NaN	NaN	NaN	NaN	NaN
A0A087WTY7;Q9H227	GBA3	0	0	0	0	0	0	1	0	0	0	0		A0A087WTQ2;A0A3B3IT47;C9JGR9;E7EQ49;Q9Y2I8;Q9Y2I8-2;Q9Y2I8-3	WDR37	1	0	0	0	0	0	0	0	0	0	0		A0A087WTS0;H0YJK8;P18283	GPX2	0	0	0	0	0	0	1	0	0	0	0
A0A087WTZ8;E5RFJ1;E5RHW9;E5RIM1;Q96MF7	NSMCE2	0	0	0	0	0	0	0	1	0	0	0		A0A087WTS0;H0YJK8;P18283	GPX2	0	0	0	0	0	0	1	0	0	0	0		A0A087WTT2;Q5JWB9;Q96A57;Q96A57-2	TMEM230	0	0	0	0	0.465496	0	0	0	0.534504	0	0
A0A087WU02;Q96RQ1	ERGIC2	0	0	0.200265	0	0.45276	0	0	0	0.346975	0	0		A0A087WTT2;Q5JWB9;Q96A57;Q96A57-2	TMEM230	0	0	0	0	0	0	0	0	1	0	0		A0A087WTU3;Q9Y6I9	TEX264	0	0	0	0	1	0	0	0	0	0	0
A0A087WU05;A0A087WY48;Q8IY22;Q8IY22-2;Q8IY22-3	CMIP	0	1	0	0	0	0	0	0	0	0	0		A0A087WTU3;Q9Y6I9	TEX264	0	0	0	0	1	0	0	0	0	0	0		A0A087WTV6;A0A087WZR9;Q96C36	PYCR2	0	0	0	0	0	0	0	1	0	0	0
A0A087WU07;Q5TGZ0;Q5TGZ0-2	MICOS10	0	0	0	0	0	0	0	0.658845	0	0	0.341155		A0A087WTV6;A0A087WZR9;Q96C36	PYCR2	0	0	0	0	0	0.459496	0	0	0	0	0.540504		A0A087WTY4;P49454	CENPF	0	1	0	0	0	0	0	0	0	0	0
A0A087WU25	ACSM2B	0	0	0	0	0	0	0	1	0	0	0		A0A087WTY4;P49454	CENPF	0	0.26936	0	0	0	0	0	0	0.416849	0	0.313791		A0A087WTY7;Q9H227	GBA3	0	0	0	0	0	0	1	0	0	0	0
A0A087WU31;A0A0A0MTB7;E9PE15;P51790;P51790-2;P51790-4;P51790-5	CLCN3	0	0	0.311655	0	0	0	0	0	0.688345	0	0		A0A087WTY7;Q9H227	GBA3	0	0	0	0	0	0	1	0	0	0	0		A0A087WTZ8;E5RFJ1;E5RHW9;E5RIM1;Q96MF7	NSMCE2	0	0	0	0	0	0	0	1	0	0	0
A0A087WU37;A0A087WWG3;A0A087X140;A0A0A0MRU4;A0A0A6YYH9;C9J3G2;H0Y857;Q5JTY5;Q5JTY5-2;Q5RIA9;Q5RIA9-3;Q5RIB0;Q5RIB3;Q8IUF1;Q9BRT8;Q9BRT8-2;Q9BRT8-3	CBWD1;CBWD3;CBWD1;CBWD3;CBWD5;CBWD2;CBWD5;CBWD3;CBWD3;CBWD5;CBWD5;CBWD5;CBWD5;CBWD2;CBWD1;CBWD1;CBWD1	NaN	NaN	NaN	NaN	NaN	NaN	NaN	NaN	NaN	NaN	NaN		A0A087WTZ8;E5RFJ1;E5RHW9;E5RIM1;Q96MF7	NSMCE2	0	0	0	0	0	0	0	1	0	0	0		A0A087WU02;Q96RQ1	ERGIC2	0	0	0	0	1	0	0	0	0	0	0
A0A087WU51	CIBAR2	0.61049	0	0	0	0	0	0	0	0.38951	0	0		A0A087WU02;Q96RQ1	ERGIC2	0	0	0	0	0	0.364235	0	0	0.635765	0	0		A0A087WU05;A0A087WY48;Q8IY22;Q8IY22-2;Q8IY22-3	CMIP	0	0	0	0	0	0	0	0	1	0	0
A0A087WU53;Q9H0U3	MAGT1	0	0	0	0	0.707303	0	0	0.292697	0	0	0		A0A087WU05;A0A087WY48;Q8IY22;Q8IY22-2;Q8IY22-3	CMIP	0	0	0.330624	0	0	0.356261	0	0	0.313115	0	0		A0A087WU07;Q5TGZ0;Q5TGZ0-2	MICOS10	0	0	0	0	0	0	0	1	0	0	0
A0A087WUB9;Q8WYA6;Q8WYA6-4	CTNNBL1	0	1	0	0	0	0	0	0	0	0	0		A0A087WU07;Q5TGZ0;Q5TGZ0-2	MICOS10	0	0	0	0	0	0	0	1	0	0	0		A0A087WU25	ACSM2B	0	0	0	0	0	0	0	1	0	0	0
A0A087WUC6;E9PI68;Q15005	SPCS2	0	0	0	0	1	0	0	0	0	0	0		A0A087WU25	ACSM2B	0	0.188572	0	0	0	0	0	0.811428	0	0	0		A0A087WU31;A0A0A0MTB7;E9PE15;P51790;P51790-2;P51790-4;P51790-5	CLCN3	0	0	0	0	0	0.469584	0	0	0.530416	0	0
A0A087WUD3;Q9NRP0;Q9NRP0-2	OSTC	NaN	NaN	NaN	NaN	NaN	NaN	NaN	NaN	NaN	NaN	NaN		A0A087WU31;A0A0A0MTB7;E9PE15;P51790;P51790-2;P51790-4;P51790-5	CLCN3	0	0	0	0	0	0.244947	0	0	0.755053	0	0		A0A087WU37;A0A087WWG3;A0A087X140;A0A0A0MRU4;A0A0A6YYH9;C9J3G2;H0Y857;Q5JTY5;Q5JTY5-2;Q5RIA9;Q5RIA9-3;Q5RIB0;Q5RIB3;Q8IUF1;Q9BRT8;Q9BRT8-2;Q9BRT8-3	CBWD1;CBWD3;CBWD1;CBWD3;CBWD5;CBWD2;CBWD5;CBWD3;CBWD3;CBWD5;CBWD5;CBWD5;CBWD5;CBWD2;CBWD1;CBWD1;CBWD1	NaN	NaN	NaN	NaN	NaN	NaN	NaN	NaN	NaN	NaN	NaN
A0A087WUE2	TACC3	1	0	0	0	0	0	0	0	0	0	0		A0A087WU37;A0A087WWG3;A0A087X140;A0A0A0MRU4;A0A0A6YYH9;C9J3G2;H0Y857;Q5JTY5;Q5JTY5-2;Q5RIA9;Q5RIA9-3;Q5RIB0;Q5RIB3;Q8IUF1;Q9BRT8;Q9BRT8-2;Q9BRT8-3	CBWD1;CBWD3;CBWD1;CBWD3;CBWD5;CBWD2;CBWD5;CBWD3;CBWD3;CBWD5;CBWD5;CBWD5;CBWD5;CBWD2;CBWD1;CBWD1;CBWD1	NaN	NaN	NaN	NaN	NaN	NaN	NaN	NaN	NaN	NaN	NaN		A0A087WU51	CIBAR2	0.432724	0	0	0	0	0.200193	0	0	0.367083	0	0
A0A087WUE4;A0A0G2JNN3;C9JMY0;Q96PV6;Q96PV6-1	LENG8	0	0.658405	0	0	0	0	0	0	0	0	0.341595		A0A087WU46;A0A0A0MSL2;A0A0C4DGN9;B4DWF2;Q13422;Q13422-2;Q9UKS7;Q9UKS7-2;Q9UKS7-4;Q9UKS7-6;Q9UKT9;Q9UKT9-10;Q9UKT9-14;Q9UKT9-15;Q9UKT9-2;Q9UKT9-4;Q9UKT9-7;Q9UKT9-9	IKZF1;IKZF2;IKZF3;IKZF2;IKZF1;IKZF1;IKZF2;IKZF2;IKZF2;IKZF2;IKZF3;IKZF3;IKZF3;IKZF3;IKZF3;IKZF3;IKZF3;IKZF3	0	1	0	0	0	0	0	0	0	0	0		A0A087WU53;Q9H0U3	MAGT1	0	0	0	0	1	0	0	0	0	0	0
A0A087WUE6;A4PB68;Q3T8J9;Q3T8J9-2;Q3T8J9-3;Q9H869;Q9H869-2;Q9H869-3;Q9H869-4;Q9H869-5;Q9H869-6;Q9H869-7;Q9H869-8;Q9H869-9	GON4L;GON4L;GON4L;GON4L;GON4L;YY1AP1;YY1AP1;YY1AP1;YY1AP1;YY1AP1;YY1AP1;YY1AP1;YY1AP1;YY1AP1	0	0	0	0	0	0	0	0	0.377784	0.622216	0		A0A087WU51	CIBAR2	0.584503	0	0	0	0	0.415497	0	0	0	0	0		A0A087WUB9;Q8WYA6;Q8WYA6-4	CTNNBL1	0	1	0	0	0	0	0	0	0	0	0
A0A087WUI6;Q8WXW3	PIBF1	0	0	0	0	0.552259	0	0	0	0.447741	0	0		A0A087WU53;Q9H0U3	MAGT1	0	0	0	0	1	0	0	0	0	0	0		A0A087WUC6;E9PI68;Q15005	SPCS2	0	0	0	0	0.710977	0	0	0.289023	0	0	0
A0A087WUJ1;Q9H400;Q9H400-2	LIME1	0	0	0	0.581488	0	0	0	0	0	0	0.418512		A0A087WUB9;Q8WYA6;Q8WYA6-4	CTNNBL1	0	1	0	0	0	0	0	0	0	0	0		A0A087WUD3;Q9NRP0;Q9NRP0-2	OSTC	0	0	0	0.206966	0.36862	0	0	0.424414	0	0	0
A0A087WUJ4;Q92618	ZNF516	0	0.41666	0	0	0	0	0	0	0	0.349686	0.233654		A0A087WUC6;E9PI68;Q15005	SPCS2	0	0	0	0	1	0	0	0	0	0	0		A0A087WUE2	TACC3	0	0	0.640951	0	0	0	0	0	0.359049	0	0
A0A087WUK2;O14979;O14979-2;O14979-3	HNRNPDL	0	1	0	0	0	0	0	0	0	0	0		A0A087WUD3;Q9NRP0;Q9NRP0-2	OSTC	0	0	0	0.45894	0.323043	0	0	0.218018	0	0	0		A0A087WUE4;A0A0G2JNN3;C9JMY0;Q96PV6;Q96PV6-1	LENG8	0	1	0	0	0	0	0	0	0	0	0
A0A087WUL2	PSMB3	1	0	0	0	0	0	0	0	0	0	0		A0A087WUE2	TACC3	0.462785	0	0	0	0	0.216116	0	0	0.321099	0	0		A0A087WUE6;A4PB68;Q3T8J9;Q3T8J9-2;Q3T8J9-3;Q9H869;Q9H869-2;Q9H869-3;Q9H869-4;Q9H869-5;Q9H869-6;Q9H869-7;Q9H869-8;Q9H869-9	GON4L;GON4L;GON4L;GON4L;GON4L;YY1AP1;YY1AP1;YY1AP1;YY1AP1;YY1AP1;YY1AP1;YY1AP1;YY1AP1;YY1AP1	0	0	0	0.280957	0	0	0	0.390524	0	0	0.328519
A0A087WUL4;A0A087WX23;A0A087WZG9;B4DSP0	PEG10	1	0	0	0	0	0	0	0	0	0	0		A0A087WUE4;A0A0G2JNN3;C9JMY0;Q96PV6;Q96PV6-1	LENG8	0	1	0	0	0	0	0	0	0	0	0		A0A087WUI6;Q8WXW3	PIBF1	0	0	0	0	1	0	0	0	0	0	0
A0A087WUM5;Q5VZR0;Q9H4G4	GLIPR2	0	0	0	0	0	0	0	0	0	0.429725	0.570275		A0A087WUE6;A4PB68;Q3T8J9;Q3T8J9-2;Q3T8J9-3;Q9H869;Q9H869-2;Q9H869-3;Q9H869-4;Q9H869-5;Q9H869-6;Q9H869-7;Q9H869-8;Q9H869-9	GON4L;GON4L;GON4L;GON4L;GON4L;YY1AP1;YY1AP1;YY1AP1;YY1AP1;YY1AP1;YY1AP1;YY1AP1;YY1AP1;YY1AP1	0	0	0.198414	0.464737	0	0	0	0	0	0	0.336849		A0A087WUJ1;Q9H400;Q9H400-2	LIME1	0	0	0	0.440527	0	0	0	0	0	0.30975	0.249723
A0A087WUQ6;P07203	GPX1	0	0	0	1	0	0	0	0	0	0	0		A0A087WUI6;Q8WXW3	PIBF1	0	0	0	0	0.466566	0	0	0	0.285115	0	0.248319		A0A087WUK2;O14979;O14979-2;O14979-3	HNRNPDL	0	1	0	0	0	0	0	0	0	0	0
A0A087WUT0;A0A0A0MR39	MYEF2	0	1	0	0	0	0	0	0	0	0	0		A0A087WUJ1;Q9H400;Q9H400-2	LIME1	0	0	0	0	0	0	0	0	0	0	1		A0A087WUL2	PSMB3	1	0	0	0	0	0	0	0	0	0	0
A0A087WUT6;O60841	EIF5B	0	1	0	0	0	0	0	0	0	0	0		A0A087WUJ4;Q92618	ZNF516	0	0	0	0	0	0.487636	0	0	0.512364	0	0		A0A087WUL4;A0A087WX23;A0A087WZG9;B4DSP0	PEG10	0.660793	0	0	0	0	0.339207	0	0	0	0	0
A0A087WUU8;M0R3J2	ZNF724	0	0	0	0	0	0	0	1	0	0	0		A0A087WUK2;O14979;O14979-2;O14979-3	HNRNPDL	0	1	0	0	0	0	0	0	0	0	0		A0A087WUM5;Q5VZR0;Q9H4G4	GLIPR2	0	0	0	0	0	0	0	0	0	0.39658	0.60342
A0A087WUV9	TYW1	0	0	1	0	0	0	0	0	0	0	0		A0A087WUL2	PSMB3	1	0	0	0	0	0	0	0	0	0	0		A0A087WUQ6;P07203	GPX1	0	0	0	0	0	0	0	1	0	0	0
A0A087WUW9;Q9NXU5	ARL15	0	1	0	0	0	0	0	0	0	0	0		A0A087WUL4;A0A087WX23;A0A087WZG9;B4DSP0	PEG10	0	0	0	0	0	0.566595	0	0	0.433405	0	0		A0A087WUT0;A0A0A0MR39	MYEF2	0	1	0	0	0	0	0	0	0	0	0
A0A087WUZ7;Q9Y5W8;Q9Y5W8-2	SNX13	0	0	0	0	1	0	0	0	0	0	0		A0A087WUM5;Q5VZR0;Q9H4G4	GLIPR2	0	0	0	0	0	0	0	0	0	0	1		A0A087WUT6;O60841	EIF5B	0	1	0	0	0	0	0	0	0	0	0
A0A087WV01	EEF1A1	0	0	0	0	0	0	0	1	0	0	0		A0A087WUQ6;P07203	GPX1	0	0	0	0	0	0	0	1	0	0	0		A0A087WUU8;M0R3J2	ZNF724	0	0.333294	0	0	0	0	0	0.234286	0	0	0.43242
A0A087WV05;Q99417	ENSG00000274944;MYCBP	NaN	NaN	NaN	NaN	NaN	NaN	NaN	NaN	NaN	NaN	NaN		A0A087WUT0;A0A0A0MR39	MYEF2	0	1	0	0	0	0	0	0	0	0	0		A0A087WUV7;A0A3B3IS76;A0A3B3ISL9;A0A3B3ISM6;A0A3B3ISX6;A0A3B3ITJ2;A0A3B3IUC8;P10746;Q5T3L9	UROS	1	0	0	0	0	0	0	0	0	0	0
A0A087WV24;P20711;P20711-3	DDC	0	0	0	0	0	0	1	0	0	0	0		A0A087WUT6;O60841	EIF5B	NaN	NaN	NaN	NaN	NaN	NaN	NaN	NaN	NaN	NaN	NaN		A0A087WUW6;A0A087X0G7;A0A087X1B1;Q9Y6K9;Q9Y6K9-2;Q9Y6K9-3	IKBKG	0	0	1	0	0	0	0	0	0	0	0
A0A087WV25;O95684;O95684-2	CEP43	0	0	1	0	0	0	0	0	0	0	0		A0A087WUU8;M0R3J2	ZNF724	0	0	0	0.571486	0	0	0	0.428514	0	0	0		A0A087WUW9;Q9NXU5	ARL15	0	0	1	0	0	0	0	0	0	0	0
A0A087WV39;Q92698;V9GYD3	RAD54L	0	0.450821	0	0	0	0	0	0	0	0.294676	0.254503		A0A087WUV7;A0A3B3IS76;A0A3B3ISL9;A0A3B3ISM6;A0A3B3ISX6;A0A3B3ITJ2;A0A3B3IUC8;P10746;Q5T3L9	UROS	1	0	0	0	0	0	0	0	0	0	0		A0A087WUZ7;Q9Y5W8;Q9Y5W8-2	SNX13	0	0	0	0	1	0	0	0	0	0	0
A0A087WV96	CYP3A7-CYP3A51P	0	0	0.333949	0	0	0	0	0	0.666051	0	0		A0A087WUV9	TYW1	0	0	0	0	0	0	0	0	1	0	0		A0A087WV01	EEF1A1	0	0	0	0	0	0	0	1	0	0	0
A0A087WV97;Q8WU79;Q8WU79-2;Q8WU79-3	SMAP2	0	0	0	0	0	0	1	0	0	0	0		A0A087WUW6;A0A087X0G7;A0A087X1B1;Q9Y6K9;Q9Y6K9-2;Q9Y6K9-3	IKBKG	0	0	0	0	0	0	0.749053	0	0	0.250947	0		A0A087WV05;Q99417	ENSG00000274944;MYCBP	NaN	NaN	NaN	NaN	NaN	NaN	NaN	NaN	NaN	NaN	NaN
A0A087WVA1;P62341	SELENOT	0	0	0	0	1	0	0	0	0	0	0		A0A087WUW9;Q9NXU5	ARL15	0	0	0	0	0	0	1	0	0	0	0		A0A087WV24;P20711;P20711-3	DDC	0	0	0	0	0	0	1	0	0	0	0
A0A087WVA8;Q8IWB9;Q8IWB9-2	TEX2	0	0	0.234116	0	0	0	0.765884	0	0	0	0		A0A087WUZ7;Q9Y5W8;Q9Y5W8-2	SNX13	0	0	0	0	0.6827	0	0	0	0.3173	0	0		A0A087WV25;O95684;O95684-2	CEP43	0	0	0	0	0	0	0.752651	0	0.247349	0	0
A0A087WVC1;Q9BQ39	DDX50	0	1	0	0	0	0	0	0	0	0	0		A0A087WV01	EEF1A1	0	0	0	0	0	0	0	1	0	0	0		A0A087WV39;Q92698;V9GYD3	RAD54L	0	0	0	0	0	0	0	0	1	0	0
A0A087WVE2;O00602	FCN1	0	0.348163	0	0	0	0	0	0	0.244982	0.212946	0.193909		A0A087WV05;Q99417	ENSG00000274944;MYCBP	0	0	0	0	0	0	1	0	0	0	0		A0A087WV61;G3V112;H0YBV2;Q8NE09;Q8NE09-3	RGS22	0.387066	0	0	0	0	0	0	0	0.612934	0	0
A0A087WVF1;K7EQH1;Q96B23;Q96B23-2	C18orf25	0	0.616602	0	0	0	0	0	0	0	0	0.383398		A0A087WV24;P20711;P20711-3	DDC	0	0	0	0	0	0	1	0	0	0	0		A0A087WV97;Q8WU79;Q8WU79-2;Q8WU79-3	SMAP2	NaN	NaN	NaN	NaN	NaN	NaN	NaN	NaN	NaN	NaN	NaN
A0A087WVF7;Q9NZM3;Q9NZM3-2	ITSN2	0	1	0	0	0	0	0	0	0	0	0		A0A087WV25;O95684;O95684-2	CEP43	0	0	0	0	0	0	1	0	0	0	0		A0A087WVA1;P62341	SELENOT	0	0	0	0	1	0	0	0	0	0	0
A0A087WVI0;E9PBL8;Q8WTW3	COG1	0.433886	0	0	0	0	0	0.566114	0	0	0	0		A0A087WV39;Q92698;V9GYD3	RAD54L	0	0	0	0	0	0	0	1	0	0	0		A0A087WVA8;Q8IWB9;Q8IWB9-2	TEX2	NaN	NaN	NaN	NaN	NaN	NaN	NaN	NaN	NaN	NaN	NaN
A0A087WVM1;P78382;P78382-2;Q5W1L7	SLC35A1	0	0	0	0	0	0	0	0	1	0	0		A0A087WV96	CYP3A7-CYP3A51P	0	0	0	0	0	0	0	0	0.290708	0.39152	0.317772		A0A087WVC1;Q9BQ39	DDX50	0	1	0	0	0	0	0	0	0	0	0
A0A087WVM4;B7ZM99	MTHFD1L	0	0	0.225256	0.391516	0	0	0	0.383228	0	0	0		A0A087WV97;Q8WU79;Q8WU79-2;Q8WU79-3	SMAP2	0	0	0	0	0	0	1	0	0	0	0		A0A087WVE2;O00602	FCN1	0	0.37163	0	0	0	0	0	0	0.62837	0	0
A0A087WVP7;P0C024;P0C024-2	NUDT7	0	0	0	1	0	0	0	0	0	0	0		A0A087WVA1;P62341	SELENOT	0	0	0	0	1	0	0	0	0	0	0		A0A087WVF1;K7EQH1;Q96B23;Q96B23-2	C18orf25	0	0	0	0.315468	0	0	0	0.263103	0	0	0.421429
A0A087WVQ6;Q00610;Q00610-2	CLTC	0	0	0	0	0	1	0	0	0	0	0		A0A087WVA8;Q8IWB9;Q8IWB9-2	TEX2	NaN	NaN	NaN	NaN	NaN	NaN	NaN	NaN	NaN	NaN	NaN		A0A087WVF7;Q9NZM3;Q9NZM3-2	ITSN2	0	0	0	0.377364	0	0	0	0	0	0.317476	0.30516
A0A087WVS8;Q70IA6;Q70IA6-3	MOB2	0	0	0	0	0	0	1	0	0	0	0		A0A087WVC1;Q9BQ39	DDX50	0	1	0	0	0	0	0	0	0	0	0		A0A087WVI0;E9PBL8;Q8WTW3	COG1	1	0	0	0	0	0	0	0	0	0	0
A0A087WVT6;A0A087X159;D6RAC5;P81877;P81877-2;P81877-3;P81877-4;P81877-5;Q9BWW4;Q9BWW4-2;Q9BWW4-3	SSBP3;SSBP2;SSBP2;SSBP2;SSBP2;SSBP2;SSBP2;SSBP2;SSBP3;SSBP3;SSBP3	0	0	0	0	0	0.462357	0	0	0.537643	0	0		A0A087WVE2;O00602	FCN1	0	0	0	0	0	0	0	0	1	0	0		A0A087WVM1;P78382;P78382-2;Q5W1L7	SLC35A1	0	0	0	0	0	0.254977	0	0	0.745023	0	0
A0A087WVT8;A0A087X1L3;Q6ZWJ8	KCP	0	0	0	0.421249	0	0	0	0	0	0.255876	0.322875		A0A087WVF1;K7EQH1;Q96B23;Q96B23-2	C18orf25	0	0.436456	0	0	0	0	0	0.563544	0	0	0		A0A087WVM4;B7ZM99	MTHFD1L	0	0	0.317631	0	0	0	0	0.682369	0	0	0
A0A087WVX4;P49895;P49895-2;P49895-4	DIO1	0	0	0.27507	0	0.72493	0	0	0	0	0	0		A0A087WVF7;Q9NZM3;Q9NZM3-2	ITSN2	NaN	NaN	NaN	NaN	NaN	NaN	NaN	NaN	NaN	NaN	NaN		A0A087WVP7;P0C024;P0C024-2	NUDT7	0	0	0	1	0	0	0	0	0	0	0
A0A087WVX5;A0A1B0GTA9;A0A1B0GTF6;A0A1B0GTN8;A0A1B0GTP5;A0A1B0GTS4;A0A1B0GTX2;A0A1B0GU53;A0A1B0GUI8;A0A1B0GUK4;A0A1B0GVB2;A0A1B0GWF9;A0A1C7CYX2;A0A2R8Y555;A0A2U3TZM7;A0A494C0B2;A0A494C0Z9;A0A494C184;E7EN11;F8VNV8;F8VU10;F8VUW8;H0Y476;O00305;O00305-2;O00305-3;O00305-4;P54284;P54284-2;P54284-3;P54284-4;P54284-5;Q02641;Q02641-2;Q02641-3;Q08289;Q08289-10;Q08289-2;Q08289-3;Q08289-4;Q08289-5;Q08289-6;Q0…	CACNB2;CACNB4;CACNB4;CACNB4;CACNB4;CACNB4;CACNB4;CACNB4;CACNB4;CACNB4;CACNB4;CACNB4;CACNB4;CACNB2;CACNB2;CACNB2;CACNB2;CACNB2;CACNB4;CACNB3;CACNB3;CACNB3;CACNB4;CACNB4;CACNB4;CACNB4;CACNB4;CACNB3;CACNB3;CACNB3;CACNB3;CACNB3;CACNB1;CACNB1;CACNB1;CACNB2;CACNB2;CACNB2;CACNB2;CACNB2;CACNB2;CACNB2;CACNB2;CACNB2;CACNB2	0	0	0	0	0.452546	0	0	0	0	0.296613	0.250841		A0A087WVI0;E9PBL8;Q8WTW3	COG1	0.650521	0	0	0	0	0.349479	0	0	0	0	0		A0A087WVQ6;Q00610;Q00610-2	CLTC	NaN	NaN	NaN	NaN	NaN	NaN	NaN	NaN	NaN	NaN	NaN
A0A087WVZ7;A0A087X068;Q9UJW7;Q9UJW7-2	ZNF229	0	0	0	0	0	0	0	0	0.608536	0.391464	0		A0A087WVM1;P78382;P78382-2;Q5W1L7	SLC35A1	0	0	0	0	0	0	0	0	1	0	0		A0A087WVS8;Q70IA6;Q70IA6-3	MOB2	0.299131	0	0	0	0	0	0.700869	0	0	0	0
A0A087WVZ9;A0A0A0MQR7;P19388	POLR2E	0	0.489948	0	0	0	0	0	0	0	0	0.510052		A0A087WVM4;B7ZM99	MTHFD1L	0	0	0.228848	0	0	0	0	0.771152	0	0	0		A0A087WVT6;A0A087X159;D6RAC5;P81877;P81877-2;P81877-3;P81877-4;P81877-5;Q9BWW4;Q9BWW4-2;Q9BWW4-3	SSBP3;SSBP2;SSBP2;SSBP2;SSBP2;SSBP2;SSBP2;SSBP2;SSBP3;SSBP3;SSBP3	0	0.517792	0	0	0	0	0	0	0.482208	0	0
A0A087WW06;B0QYP5;Q96AY4	TTC28	0.624762	0	0.375238	0	0	0	0	0	0	0	0		A0A087WVP7;P0C024;P0C024-2	NUDT7	0	0	0	1	0	0	0	0	0	0	0		A0A087WVT8;A0A087X1L3;Q6ZWJ8	KCP	0	0	0	0.381846	0	0	0	0	0	0	0.618154
A0A087WW23;P20292	ALOX5AP	0	0.471669	0	0	0	0	0	0	0	0	0.528331		A0A087WVQ6;Q00610;Q00610-2	CLTC	0	0	0	0	0	1	0	0	0	0	0		A0A087WVX4;P49895;P49895-2;P49895-4	DIO1	0	0	0.419636	0	0.580364	0	0	0	0	0	0
A0A087WW28	MAGIX	0.521147	0	0	0	0	0	0	0	0.478853	0	0		A0A087WVS8;Q70IA6;Q70IA6-3	MOB2	0	0	0	0	0	0	1	0	0	0	0		A0A087WVX5;A0A1B0GTA9;A0A1B0GTF6;A0A1B0GTN8;A0A1B0GTP5;A0A1B0GTS4;A0A1B0GTX2;A0A1B0GU53;A0A1B0GUI8;A0A1B0GUK4;A0A1B0GVB2;A0A1B0GWF9;A0A1C7CYX2;A0A2R8Y555;A0A2U3TZM7;A0A494C0B2;A0A494C0Z9;A0A494C184;E7EN11;F8VNV8;F8VU10;F8VUW8;H0Y476;O00305;O00305-2;O00305-3;O00305-4;P54284;P54284-2;P54284-3;P54284-4;P54284-5;Q02641;Q02641-2;Q02641-3;Q08289;Q08289-10;Q08289-2;Q08289-3;Q08289-4;Q08289-5;Q08289-6;Q0…	CACNB2;CACNB4;CACNB4;CACNB4;CACNB4;CACNB4;CACNB4;CACNB4;CACNB4;CACNB4;CACNB4;CACNB4;CACNB4;CACNB2;CACNB2;CACNB2;CACNB2;CACNB2;CACNB4;CACNB3;CACNB3;CACNB3;CACNB4;CACNB4;CACNB4;CACNB4;CACNB4;CACNB3;CACNB3;CACNB3;CACNB3;CACNB3;CACNB1;CACNB1;CACNB1;CACNB2;CACNB2;CACNB2;CACNB2;CACNB2;CACNB2;CACNB2;CACNB2;CACNB2;CACNB2	0	0	0	0	0	0	0	0	0	0	1
A0A087WW48;E7ET14;H0Y3N9;H0Y589;O75151;Q9UPP1;Q9UPP1-2;Q9UPP1-3;Q9UPP1-4;Q9UPP1-5	PHF2;PHF2;PHF8;PHF8;PHF2;PHF8;PHF8;PHF8;PHF8;PHF8	0.366472	0	0	0	0	0	0.633528	0	0	0	0		A0A087WVT6;A0A087X159;D6RAC5;P81877;P81877-2;P81877-3;P81877-4;P81877-5;Q9BWW4;Q9BWW4-2;Q9BWW4-3	SSBP3;SSBP2;SSBP2;SSBP2;SSBP2;SSBP2;SSBP2;SSBP2;SSBP3;SSBP3;SSBP3	0	0	0	0	0	0	0	0	1	0	0		A0A087WVZ7;A0A087X068;Q9UJW7;Q9UJW7-2	ZNF229	0	0	0.495781	0	0	0	0	0.504219	0	0	0
A0A087WW58;Q9C0D9	SELENOI	0	0.390755	0.276954	0	0	0	0	0	0	0	0.332291		A0A087WVT8;A0A087X1L3;Q6ZWJ8	KCP	0	0.299473	0.284531	0	0	0	0	0	0	0	0.415996		A0A087WVZ9;A0A0A0MQR7;P19388	POLR2E	0	0	0	0	0	0.312889	0	0	0.342199	0	0.344912
A0A087WW59;Q7Z7L8	C11orf96	0	0	0	0	0	0	1	0	0	0	0		A0A087WVX4;P49895;P49895-2;P49895-4	DIO1	0	0	0.41428	0	0.58572	0	0	0	0	0	0		A0A087WW00;C9J9H9;P51668;Q9Y2X8	UBE2D1;UBE2D4;UBE2D1;UBE2D4	0	0	0	0	0	0	1	0	0	0	0
A0A087WW66;Q99460;Q99460-2	PSMD1	1	0	0	0	0	0	0	0	0	0	0		A0A087WVX5;A0A1B0GTA9;A0A1B0GTF6;A0A1B0GTN8;A0A1B0GTP5;A0A1B0GTS4;A0A1B0GTX2;A0A1B0GU53;A0A1B0GUI8;A0A1B0GUK4;A0A1B0GVB2;A0A1B0GWF9;A0A1C7CYX2;A0A2R8Y555;A0A2U3TZM7;A0A494C0B2;A0A494C0Z9;A0A494C184;E7EN11;F8VNV8;F8VU10;F8VUW8;H0Y476;O00305;O00305-2;O00305-3;O00305-4;P54284;P54284-2;P54284-3;P54284-4;P54284-5;Q02641;Q02641-2;Q02641-3;Q08289;Q08289-10;Q08289-2;Q08289-3;Q08289-4;Q08289-5;Q08289-6;Q0…	CACNB2;CACNB4;CACNB4;CACNB4;CACNB4;CACNB4;CACNB4;CACNB4;CACNB4;CACNB4;CACNB4;CACNB4;CACNB4;CACNB2;CACNB2;CACNB2;CACNB2;CACNB2;CACNB4;CACNB3;CACNB3;CACNB3;CACNB4;CACNB4;CACNB4;CACNB4;CACNB4;CACNB3;CACNB3;CACNB3;CACNB3;CACNB3;CACNB1;CACNB1;CACNB1;CACNB2;CACNB2;CACNB2;CACNB2;CACNB2;CACNB2;CACNB2;CACNB2;CACNB2;CACNB2	0	0	0	0	1	0	0	0	0	0	0		A0A087WW06;B0QYP5;Q96AY4	TTC28	0	0	0	0	0	0	0	0	1	0	0
A0A087WW76;A0A1B0GTZ9;A0A1B0GV73;A0A452Q6Z5;H0Y468;Q5T5U3	ARHGAP21	0	0.628492	0	0	0	0	0	0.371508	0	0	0		A0A087WVZ7;A0A087X068;Q9UJW7;Q9UJW7-2	ZNF229	0	0	0	0	0.557369	0	0	0	0	0	0.442631		A0A087WW23;P20292	ALOX5AP	0	0.548471	0	0	0	0	0	0	0	0	0.451529
A0A087WW77;Q15334	LLGL1	0	0	0	0	0	1	0	0	0	0	0		A0A087WVZ9;A0A0A0MQR7;P19388	POLR2E	0	1	0	0	0	0	0	0	0	0	0		A0A087WW28	MAGIX	1	0	0	0	0	0	0	0	0	0	0
A0A087WWA3;O60333;O60333-2;O60333-4;Q4R9M9	KIF1B	0.353423	0	0	0	0	0	0.646577	0	0	0	0		A0A087WW00;C9J9H9;P51668;Q9Y2X8	UBE2D1;UBE2D4;UBE2D1;UBE2D4	0	0	0	0	0	0	0	0	1	0	0		A0A087WW48;E7ET14;H0Y3N9;H0Y589;O75151;Q9UPP1;Q9UPP1-2;Q9UPP1-3;Q9UPP1-4;Q9UPP1-5	PHF2;PHF2;PHF8;PHF8;PHF2;PHF8;PHF8;PHF8;PHF8;PHF8	0.458525	0	0.541475	0	0	0	0	0	0	0	0
A0A087WWA7;O14640;O14640-2;P54792;P54792-2	DVL1;DVL1;DVL1;DVL1P1;DVL1P1	0	0	0	0	0	0	0	0	1	0	0		A0A087WW06;B0QYP5;Q96AY4	TTC28	0	0	0.408792	0	0	0.300333	0	0	0.290875	0	0		A0A087WW58;Q9C0D9	SELENOI	0	0	0	0	0.624584	0	0	0	0.375416	0	0
A0A087WWF6;F8W8R3;P49005	POLD2	NaN	NaN	NaN	NaN	NaN	NaN	NaN	NaN	NaN	NaN	NaN		A0A087WW23;P20292	ALOX5AP	0	0.596337	0	0	0	0	0	0	0	0	0.403663		A0A087WW59;Q7Z7L8	C11orf96	0	0	0	0	0	0	1	0	0	0	0
A0A087WWG5	RAD54L	0	0	0	0	1	0	0	0	0	0	0		A0A087WW28	MAGIX	0.722206	0	0	0	0	0.277794	0	0	0	0	0		A0A087WW66;Q99460;Q99460-2	PSMD1	1	0	0	0	0	0	0	0	0	0	0
A0A087WWH3;Q9NZM4;Q9NZM4-2	BICRA	0	1	0	0	0	0	0	0	0	0	0		A0A087WW48;E7ET14;H0Y3N9;H0Y589;O75151;Q9UPP1;Q9UPP1-2;Q9UPP1-3;Q9UPP1-4;Q9UPP1-5	PHF2;PHF2;PHF8;PHF8;PHF2;PHF8;PHF8;PHF8;PHF8;PHF8	0	0	0	0	0	0	0	0	1	0	0		A0A087WW76;A0A1B0GTZ9;A0A1B0GV73;A0A452Q6Z5;H0Y468;Q5T5U3	ARHGAP21	0	0	0	0	0	0	0	0	1	0	0
A0A087WWI0	LRMDA	0	0	0	0	0	0	1	0	0	0	0		A0A087WW58;Q9C0D9	SELENOI	0	0	0	0	0.603311	0	0	0	0	0	0.396689		A0A087WW77;Q15334	LLGL1	NaN	NaN	NaN	NaN	NaN	NaN	NaN	NaN	NaN	NaN	NaN
A0A087WWM0;O43617	TRAPPC3	0.423302	0	0	0	0	0	0.576698	0	0	0	0		A0A087WW59;Q7Z7L8	C11orf96	0	0	0	0	0	0	1	0	0	0	0		A0A087WWA3;O60333;O60333-2;O60333-4;Q4R9M9	KIF1B	0.385168	0	0	0	0	0	0.614832	0	0	0	0
A0A087WWM4;H0YNJ6;Q9P2T1;Q9P2T1-2	GMPR2	0	0	0	0	0	0	1	0	0	0	0		A0A087WW66;Q99460;Q99460-2	PSMD1	0.780436	0	0	0	0	0.219564	0	0	0	0	0		A0A087WWA7;O14640;O14640-2;P54792;P54792-2	DVL1;DVL1;DVL1;DVL1P1;DVL1P1	0	0	0	0	0	0.318577	0	0	0.681423	0	0
A0A087WWM6;E7EQL6;O43272;O43272-1;O43272-2	PRODH	0	0	0	0	0	0	0	1	0	0	0		A0A087WW76;A0A1B0GTZ9;A0A1B0GV73;A0A452Q6Z5;H0Y468;Q5T5U3	ARHGAP21	0	0	0	0	0	0	0	0	0	0	1		A0A087WWF6;F8W8R3;P49005	POLD2	0	0	0	0	0	1	0	0	0	0	0
A0A087WWP4;A0A494C001;A0A499FJY3;Q96T37;Q96T37-2;Q96T37-3;Q96T37-4	RBM15	0	1	0	0	0	0	0	0	0	0	0		A0A087WW77;Q15334	LLGL1	0.68929	0	0	0	0	0.31071	0	0	0	0	0		A0A087WWG5	RAD54L	0	0	0.306806	0	0.693194	0	0	0	0	0	0
A0A087WWP5;Q12962	TAF10	0	1	0	0	0	0	0	0	0	0	0		A0A087WW83;A0A087X0K8;Q6PRD1	GPR179	0	0	0.240714	0	0	0	0	0	0.759286	0	0		A0A087WWH3;Q9NZM4;Q9NZM4-2	BICRA	0	1	0	0	0	0	0	0	0	0	0
A0A087WWP8;A0A0C4DGT8;A0A0C4DH79;Q5VWQ0;Q5VWQ0-4	RSBN1	0	0	0	0	0	0	0	0.552389	0	0	0.447611		A0A087WWA3;O60333;O60333-2;O60333-4;Q4R9M9	KIF1B	0.384224	0	0	0	0	0	0.615776	0	0	0	0		A0A087WWI0	LRMDA	0	0	0	0	0	0	1	0	0	0	0
A0A087WWQ2;Q92979;V9GYP5	EMG1	0	1	0	0	0	0	0	0	0	0	0		A0A087WWA7;O14640;O14640-2;P54792;P54792-2	DVL1;DVL1;DVL1;DVL1P1;DVL1P1	0	0	0	0	0	0.404566	0	0	0.595434	0	0		A0A087WWM0;O43617	TRAPPC3	0.385289	0	0	0	0	0	0.614711	0	0	0	0
A0A087WWR2;H3BQI4;H3BQS2;I3L2Z5;P56270;P56270-2;P56270-3;P56270-4	MAZ	0	0	0	0	0	0.336098	0	0	0.663902	0	0		A0A087WWF6;F8W8R3;P49005	POLD2	0	1	0	0	0	0	0	0	0	0	0		A0A087WWM4;H0YNJ6;Q9P2T1;Q9P2T1-2	GMPR2	0	0	0	0	0	0	1	0	0	0	0
A0A087WWS1;Q96FV9	THOC1	0	0.541559	0	0	0	0	0	0	0	0	0.458441		A0A087WWG5	RAD54L	0	0	0	0	1	0	0	0	0	0	0		A0A087WWM6;E7EQL6;O43272;O43272-1;O43272-2	PRODH	0	0	0	0	0	0	0	1	0	0	0
A0A087WWT7;A0A1W2PRP3;Q7Z7M1	ADGRD2	0	0	0	0	0	0.340868	0	0	0.408164	0.250969	0		A0A087WWH3;Q9NZM4;Q9NZM4-2	BICRA	0	1	0	0	0	0	0	0	0	0	0		A0A087WWP4;A0A494C001;A0A499FJY3;Q96T37;Q96T37-2;Q96T37-3;Q96T37-4	RBM15	0	1	0	0	0	0	0	0	0	0	0
A0A087WWU8	TPM3	0.558817	0	0	0	0	0	0	0	0.441183	0	0		A0A087WWI0	LRMDA	0	0	0	0	0	0	1	0	0	0	0		A0A087WWP5;Q12962	TAF10	0	0.62773	0	0	0	0	0	0	0.37227	0	0
A0A087WWW9;O95999	BCL10	0	0	0	0	0	0	1	0	0	0	0		A0A087WWM0;O43617	TRAPPC3	0	0	0	0	0	0	1	0	0	0	0		A0A087WWP8;A0A0C4DGT8;A0A0C4DH79;Q5VWQ0;Q5VWQ0-4	RSBN1	0	0	0	0	0	0	0	0.751341	0	0	0.248659
A0A087WWY0;P08519	LPA	0	0	1	0	0	0	0	0	0	0	0		A0A087WWM4;H0YNJ6;Q9P2T1;Q9P2T1-2	GMPR2	0.30383	0	0	0	0	0	0.69617	0	0	0	0		A0A087WWQ2;Q92979;V9GYP5	EMG1	0	1	0	0	0	0	0	0	0	0	0
A0A087WX02;F8WB74;M0QYX1;P63302	SELENOW	0	0	1	0	0	0	0	0	0	0	0		A0A087WWM6;E7EQL6;O43272;O43272-1;O43272-2	PRODH	0	0	0.176133	0	0	0	0	0.823867	0	0	0		A0A087WWR2;H3BQI4;H3BQS2;I3L2Z5;P56270;P56270-2;P56270-3;P56270-4	MAZ	0	1	0	0	0	0	0	0	0	0	0
A0A087WX10;G3V4M2;G3V5E8;P54803	GALC	0	0	0	0	0	0	0	1	0	0	0		A0A087WWP4;A0A494C001;A0A499FJY3;Q96T37;Q96T37-2;Q96T37-3;Q96T37-4	RBM15	0	1	0	0	0	0	0	0	0	0	0		A0A087WWS1;Q96FV9	THOC1	0	1	0	0	0	0	0	0	0	0	0
A0A087WX11;J3KNG8;Q8TF40;Q8TF40-3	FNIP1	0.587971	0	0	0	0	0	0	0	0.412029	0	0		A0A087WWP5;Q12962	TAF10	0	1	0	0	0	0	0	0	0	0	0		A0A087WWT7;A0A1W2PRP3;Q7Z7M1	ADGRD2	0.424226	0	0	0	0	0.265612	0	0	0.310162	0	0
A0A087WX19;A0A087WX45;C9J5R6	IQCE	0	0	0	0	0	0	0	1	0	0	0		A0A087WWP8;A0A0C4DGT8;A0A0C4DH79;Q5VWQ0;Q5VWQ0-4	RSBN1	0	0	0	0	0	0	0	0	0.501306	0	0.498694		A0A087WWU8	TPM3	0	0	0	1	0	0	0	0	0	0	0
A0A087WX80;A0A087WYF1;P24043	LAMA2	0	1	0	0	0	0	0	0	0	0	0		A0A087WWQ2;Q92979;V9GYP5	EMG1	0	1	0	0	0	0	0	0	0	0	0		A0A087WWW9;O95999	BCL10	0	0	0	0	0	0	1	0	0	0	0
A0A087WX97;Q9BXK5	BCL2L13	0	0	0	1	0	0	0	0	0	0	0		A0A087WWR2;H3BQI4;H3BQS2;I3L2Z5;P56270;P56270-2;P56270-3;P56270-4	MAZ	0	1	0	0	0	0	0	0	0	0	0		A0A087WWY0;P08519	LPA	0	0	0.314416	0	0.685584	0	0	0	0	0	0
A0A087WX99;A0A0G2JRA4;P55283;P55283-2	CDH4	0	0	0	0	0	0	0	0	0	0.550449	0.449551		A0A087WWS1;Q96FV9	THOC1	0	1	0	0	0	0	0	0	0	0	0		A0A087WX02;F8WB74;M0QYX1;P63302	SELENOW	0	0	0.668082	0	0	0	0	0	0.331918	0	0
A0A087WXB0;O15126	SCAMP1	0	0	0	0	0	1	0	0	0	0	0		A0A087WWT7;A0A1W2PRP3;Q7Z7M1	ADGRD2	0	0	0	0.536383	0	0	0	0	0.463617	0	0		A0A087WX10;G3V4M2;G3V5E8;P54803	GALC	0	0	0	0	0.435153	0	0	0	0	0.259847	0.305
A0A087WXB8;C9J0E2;C9J480;C9JWJ3;C9JXM2;Q9Y274	ST3GAL6	0	0	0	0	0	0	0	0	1	0	0		A0A087WWU8	TPM3	0	0.563533	0.436467	0	0	0	0	0	0	0	0		A0A087WX11;J3KNG8;Q8TF40;Q8TF40-3	FNIP1	0.596947	0	0.403053	0	0	0	0	0	0	0	0
A0A087WXC5;E7ESZ7;O95299	NDUFA10	0	0	0	0	0	0	0	1	0	0	0		A0A087WWW9;O95999	BCL10	0	0	0	0	0	0	1	0	0	0	0		A0A087WX19;A0A087WX45;C9J5R6	IQCE	0	0	0	0	0	0	0	1	0	0	0
A0A087WXD1;Q96T83	SLC9A7	0	0	0	0	0	0.455385	0	0	0.544615	0	0		A0A087WWY0;P08519	LPA	0	0	0	0	1	0	0	0	0	0	0		A0A087WX22;H3BVG2;Q2M296-3;Q2M296-4	MTHFSD	0	0	0	0	0	0	0	0	0	0	1
A0A087WXI2;Q9Y6R7	FCGBP	0	0	0	0.412174	0	0	0	0.341879	0	0.245946	0		A0A087WX02;F8WB74;M0QYX1;P63302	SELENOW	0	0	0	0	0	0	0	0	1	0	0		A0A087WX80;A0A087WYF1;P24043	LAMA2	0	0.42405	0	0.290503	0	0	0	0	0	0	0.285446
A0A087WXI5;P12830;P12830-2	CDH1	0	0	0	0	0	0	0	0	0	0	1		A0A087WX10;G3V4M2;G3V5E8;P54803	GALC	0	1	0	0	0	0	0	0	0	0	0		A0A087WX97;Q9BXK5	BCL2L13	0	0	0	0.508784	0	0	0	0.491216	0	0	0
A0A087WXK4;Q7Z3F1	GPR155	0	0	0	0	1	0	0	0	0	0	0		A0A087WX11;J3KNG8;Q8TF40;Q8TF40-3	FNIP1	0	0	1	0	0	0	0	0	0	0	0		A0A087WX99;A0A0G2JRA4;P55283;P55283-2	CDH4	0	0	0.472379	0	0	0	0	0	0.527621	0	0
A0A087WXL6;B7Z879;Q9H270	VPS11	0	0	0	0	0	1	0	0	0	0	0		A0A087WX19;A0A087WX45;C9J5R6	IQCE	0	0.210378	0	0	0	0	0	0.789622	0	0	0		A0A087WXB0;O15126	SCAMP1	NaN	NaN	NaN	NaN	NaN	NaN	NaN	NaN	NaN	NaN	NaN
A0A087WXM6;A0A0A6YYL6;J3KRX5;J3QQT2;P18621;P18621-3	RPL17;RPL17-C18orf32;RPL17;RPL17;RPL17;RPL17	0	0	0	0	0.574491	0	0	0.425509	0	0	0		A0A087WX22;H3BVG2;Q2M296-3;Q2M296-4	MTHFSD	0	0	0	0	0.714101	0	0	0	0	0	0.285899		A0A087WXC5;E7ESZ7;O95299	NDUFA10	0	0	0	0	0	0	0	1	0	0	0
A0A087WXN9;Q765P7	MTSS2	0	0	0	0	0	0	1	0	0	0	0		A0A087WX80;A0A087WYF1;P24043	LAMA2	0	0.521546	0	0	0	0	0	0.478454	0	0	0		A0A087WXD1;Q96T83	SLC9A7	0	0	0	0	0.46421	0	0	0	0.261217	0.274574	0
A0A087WXS6;C9JBF1	C2orf74	0	0	1	0	0	0	0	0	0	0	0		A0A087WX97;Q9BXK5	BCL2L13	0	0	0	0	0	0	0	1	0	0	0		A0A087WXF8;A0A087WYV3;A0A0D9SEW3;Q9NP64;Q9NP64-2;Q9NP64-3	ZCCHC17	0	0	0	0	0	0	0	0	0	0	1
A0A087WXU0;A0A2R8Y4J4;Q9NWS8;Q9NWS8-2	RMND1	0	0	0	0	0	0	0	1	0	0	0		A0A087WX99;A0A0G2JRA4;P55283;P55283-2	CDH4	0	0	0	0	0.513463	0	0	0	0	0	0.486537		A0A087WXI2;Q9Y6R7	FCGBP	0	1	0	0	0	0	0	0	0	0	0
A0A087WXV4;P41235;P41235-2;P41235-4;P41235-5;P41235-6	HNF4A	0	1	0	0	0	0	0	0	0	0	0		A0A087WXB0;O15126	SCAMP1	0	0	0	0	0	0.520668	0	0	0.479332	0	0		A0A087WXI5;P12830;P12830-2	CDH1	0	0	0	0.53697	0	0	0	0	0	0	0.46303
A0A087WXW3;Q9Y3P8	SIT1	0	0	0.726197	0	0	0	0	0	0	0	0.273803		A0A087WXB8;C9J0E2;C9J480;C9JWJ3;C9JXM2;Q9Y274	ST3GAL6	0	0	0	0	0	0	0	0	1	0	0		A0A087WXL0;A0A087X1G7;A0A0J9YX89;A0A3B3IT39;A8MZD0;O60613;O60613-2	SELENOF	0	0	0	0	1	0	0	0	0	0	0
A0A087WXW6;A0A140TA70;A0A140TA74;A9JR48;Q9BXA9;Q9BXA9-2;Q9BXA9-3;Q9BXA9-4	SALL3	0.487766	0.512234	0	0	0	0	0	0	0	0	0		A0A087WXC5;E7ESZ7;O95299	NDUFA10	0	0	0	0	0	0	0	1	0	0	0		A0A087WXL6;B7Z879;Q9H270	VPS11	NaN	NaN	NaN	NaN	NaN	NaN	NaN	NaN	NaN	NaN	NaN
A0A087WY00;F8W6H6;F8WE88;G3V394;Q9Y4I1;Q9Y4I1-2;Q9Y4I1-3	MYO5A	0	0.274955	0	0	0	0	0	0.209861	0	0.271474	0.24371		A0A087WXD1;Q96T83	SLC9A7	0	0	0	0	0	0	0	0	1	0	0		A0A087WXM6;A0A0A6YYL6;J3KRX5;J3QQT2;P18621;P18621-3	RPL17;RPL17-C18orf32;RPL17;RPL17;RPL17;RPL17	0	0	0	0	0.496407	0	0	0.503593	0	0	0
A0A087WY55;Q9NP79	VTA1	0	0	0	0	0	0	1	0	0	0	0		A0A087WXF8;A0A087WYV3;A0A0D9SEW3;Q9NP64;Q9NP64-2;Q9NP64-3	ZCCHC17	0	0	0	0.542424	0	0	0	0	0	0	0.457576		A0A087WXN9;Q765P7	MTSS2	0	0	0	0	0	0	1	0	0	0	0
A0A087WY67;P0CG29;P0CG30;Q6ICJ4	GSTT2;GSTT2;GSTT2B;GSTT2B	0	0	0	0	0	0	1	0	0	0	0		A0A087WXI2;Q9Y6R7	FCGBP	0	0.622989	0.377011	0	0	0	0	0	0	0	0		A0A087WXP0	AZU1	0	0.407032	0	0	0	0	0	0	0.317375	0	0.275593
A0A087WY71;Q96CW1;Q96CW1-2	AP2M1	0	0	0	0.575931	0	0	0	0	0	0	0.424069		A0A087WXI5;P12830;P12830-2	CDH1	NaN	NaN	NaN	NaN	NaN	NaN	NaN	NaN	NaN	NaN	NaN		A0A087WXS6;C9JBF1	C2orf74	0.417811	0	0.582189	0	0	0	0	0	0	0	0
A0A087WY85;A0A0A0MQU3;D6RAH7;D6RFM0;H9KV45;P61077;P61077-2;P61077-3;P62837;P62837-2	UBE2D3;UBE2D2;UBE2D3;UBE2D2;UBE2D3;UBE2D3;UBE2D3;UBE2D3;UBE2D2;UBE2D2	0.56257	0	0	0	0	0.43743	0	0	0	0	0		A0A087WXK4;Q7Z3F1	GPR155	0	0	0	0	0	0	0	0	1	0	0		A0A087WXU0;A0A2R8Y4J4;Q9NWS8;Q9NWS8-2	RMND1	0	0	0	0	0	0	0	1	0	0	0
A0A087WYD6;A0A0G2JLV0;Q03519;X5CMH5	TAP2	0	0	0.336787	0	0.663213	0	0	0	0	0	0		A0A087WXL0;A0A087X1G7;A0A0J9YX89;A0A3B3IT39;A8MZD0;O60613;O60613-2	SELENOF	0	0	0	0	0.724485	0	0	0	0	0	0.275515		A0A087WXV4;P41235;P41235-2;P41235-4;P41235-5;P41235-6	HNF4A	0	0.747874	0	0	0	0	0	0	0	0	0.252126
A0A087WYF7;Q6UXV4	APOOL	0	0	0	0	0	0	0	1	0	0	0		A0A087WXL6;B7Z879;Q9H270	VPS11	0	0	0	0	0	1	0	0	0	0	0		A0A087WXW3;Q9Y3P8	SIT1	0	0.586118	0	0	0	0	0	0.413882	0	0	0
A0A087WYJ2;M0QZR8;M0R2B7;P28340	POLD1	NaN	NaN	NaN	NaN	NaN	NaN	NaN	NaN	NaN	NaN	NaN		A0A087WXM6;A0A0A6YYL6;J3KRX5;J3QQT2;P18621;P18621-3	RPL17;RPL17-C18orf32;RPL17;RPL17;RPL17;RPL17	0	0	0	0.284517	0.452736	0	0	0.262748	0	0	0		A0A087WXW6;A0A140TA70;A0A140TA74;A9JR48;Q9BXA9;Q9BXA9-2;Q9BXA9-3;Q9BXA9-4	SALL3	0	0	1	0	0	0	0	0	0	0	0
A0A087WYL3;Q17R60	IMPG1	0	0	0	0	0	0	0	0.720024	0	0.279976	0		A0A087WXN9;Q765P7	MTSS2	0	0	0	0	0	0	1	0	0	0	0		A0A087WXX8	SDHB	0	0	0	0.430278	0	0	0	0.569722	0	0	0
A0A087WYL6;A0A087WZG6;A0A087X1S9;Q8TEW8;Q8TEW8-2;Q8TEW8-3;Q8TEW8-5;Q8TEW8-6;R4GN62	PARD3B	0	0	0	0	0	0	0	0	0	0.568098	0.431902		A0A087WXP0	AZU1	0	0	0	0	0	0	0	0	1	0	0		A0A087WY00;F8W6H6;F8WE88;G3V394;Q9Y4I1;Q9Y4I1-2;Q9Y4I1-3	MYO5A	0	0	0	0	0	0	0	0	0.528146	0	0.471854
A0A087WYM3;A0A0A0MRF5;E7EWX6;Q8IXJ6;Q8IXJ6-2;Q8IXJ6-3;Q8IXJ6-4	SIRT2	NaN	NaN	NaN	NaN	NaN	NaN	NaN	NaN	NaN	NaN	NaN		A0A087WXS6;C9JBF1	C2orf74	0.69608	0	0.30392	0	0	0	0	0	0	0	0		A0A087WY55;Q9NP79	VTA1	0	0	0	0	0	0	1	0	0	0	0
A0A087WYN9;Q7Z478	DHX29	0	0	1	0	0	0	0	0	0	0	0		A0A087WXU0;A0A2R8Y4J4;Q9NWS8;Q9NWS8-2	RMND1	0	0	0	0	0	0	0	1	0	0	0		A0A087WY67;P0CG29;P0CG30;Q6ICJ4	GSTT2;GSTT2;GSTT2B;GSTT2B	0	0	0	0	0	0	1	0	0	0	0
A0A087WYP2;Q8IZQ5	SELENOH	0	0	0	0	0	0	1	0	0	0	0		A0A087WXV4;P41235;P41235-2;P41235-4;P41235-5;P41235-6	HNF4A	0	0.511953	0	0	0	0	0	0	0.203732	0	0.284315		A0A087WY71;Q96CW1;Q96CW1-2	AP2M1	0	0	0	0.504898	0	0	0	0	0	0	0.495102
A0A087WYR0;P09132	SRP19	0	0	0	0	1	0	0	0	0	0	0		A0A087WXW3;Q9Y3P8	SIT1	0	1	0	0	0	0	0	0	0	0	0		A0A087WY85;A0A0A0MQU3;D6RAH7;D6RFM0;H9KV45;P61077;P61077-2;P61077-3;P62837;P62837-2	UBE2D3;UBE2D2;UBE2D3;UBE2D2;UBE2D3;UBE2D3;UBE2D3;UBE2D3;UBE2D2;UBE2D2	0.393178	0	0	0	0	0	0.606822	0	0	0	0
A0A087WYS3;Q9ULU4;Q9ULU4-10;Q9ULU4-11;Q9ULU4-12;Q9ULU4-13;Q9ULU4-19;Q9ULU4-22;Q9ULU4-7;Q9ULU4-8;Q9ULU4-9	ZMYND8	0	0	0	0	0	0	1	0	0	0	0		A0A087WXW6;A0A140TA70;A0A140TA74;A9JR48;Q9BXA9;Q9BXA9-2;Q9BXA9-3;Q9BXA9-4	SALL3	0	0.282593	0	0	0	0.383745	0	0	0.333662	0	0		A0A087WYA1;Q9UKN7	MYO15A	0	0.459255	0	0	0	0	0	0.540745	0	0	0
A0A087WYT3;Q15185;Q15185-4	PTGES3	1	0	0	0	0	0	0	0	0	0	0		A0A087WXX8	SDHB	0	0	0.18514	0.370758	0	0	0	0.444102	0	0	0		A0A087WYD6;A0A0G2JLV0;Q03519;X5CMH5	TAP2	0	0	0	0	1	0	0	0	0	0	0
A0A087WYV9;A0A087X1F5;P57105	SYNJ2BP-COX16;SYNJ2BP-COX16;SYNJ2BP	0	0	0	0	0	0	0	1	0	0	0		A0A087WY00;F8W6H6;F8WE88;G3V394;Q9Y4I1;Q9Y4I1-2;Q9Y4I1-3	MYO5A	0	0.669034	0	0	0	0	0	0	0	0	0.330966		A0A087WYF2;F5H2F2;P54687;P54687-2;P54687-3;P54687-4;P54687-5	BCAT1	0	0	0.326941	0	0	0.271499	0	0	0.40156	0	0
A0A087WYX8;A0A1W2PQW0;A0A590UJL7;A0A5F9ZH12;A0A5F9ZHT2;A0A6Q8PH73;Q14CM0	FRMPD4	0	0	0.193306	0	0	0	0	0	0.241785	0.29166	0.273249		A0A087WY55;Q9NP79	VTA1	0	0	0	0	0	0	1	0	0	0	0		A0A087WYF7;Q6UXV4	APOOL	0	0.271877	0	0	0	0	0	0.728123	0	0	0
A0A087WYY0;A0A087X260;B1AKP7;G3V162;Q13148	TARDBP	0	1	0	0	0	0	0	0	0	0	0		A0A087WY67;P0CG29;P0CG30;Q6ICJ4	GSTT2;GSTT2;GSTT2B;GSTT2B	0	0	0	0	0	0	1	0	0	0	0		A0A087WYJ2;M0QZR8;M0R2B7;P28340	POLD1	0	0	0.481042	0	0	0	0	0	0	0	0.518958
A0A087WZ13;E9PAU2;Q8IY67;Q8IY67-2	RAVER1	0	0	0	0	0	0	1	0	0	0	0		A0A087WY71;Q96CW1;Q96CW1-2	AP2M1	0	0	0	0.460255	0.539745	0	0	0	0	0	0		A0A087WYL3;Q17R60	IMPG1	0	0	0	0	0	0	0	0	1	0	0
A0A087WZ32;A8K727;Q9HB19	PLEKHA2	0	0	0	0	0	0	1	0	0	0	0		A0A087WY85;A0A0A0MQU3;D6RAH7;D6RFM0;H9KV45;P61077;P61077-2;P61077-3;P62837;P62837-2	UBE2D3;UBE2D2;UBE2D3;UBE2D2;UBE2D3;UBE2D3;UBE2D3;UBE2D3;UBE2D2;UBE2D2	0	0	0	0	0	0	1	0	0	0	0		A0A087WYL6;A0A087WZG6;A0A087X1S9;Q8TEW8;Q8TEW8-2;Q8TEW8-3;Q8TEW8-5;Q8TEW8-6;R4GN62	PARD3B	NaN	NaN	NaN	NaN	NaN	NaN	NaN	NaN	NaN	NaN	NaN
A0A087WZ40;Q14244;Q14244-6;Q14244-7	MAP7	0	0	0	0	0	0	1	0	0	0	0		A0A087WYA1;Q9UKN7	MYO15A	0	0	0.177035	0	0	0	0	0.822965	0	0	0		A0A087WYM3;A0A0A0MRF5;E7EWX6;Q8IXJ6;Q8IXJ6-2;Q8IXJ6-3;Q8IXJ6-4	SIRT2	NaN	NaN	NaN	NaN	NaN	NaN	NaN	NaN	NaN	NaN	NaN
A0A087WZ50;Q8TCT7;Q8TCT7-2;Q8TCT7-4	SPPL2B	0.67334	0.32666	0	0	0	0	0	0	0	0	0		A0A087WYD6;A0A0G2JLV0;Q03519;X5CMH5	TAP2	0	0	0	0	1	0	0	0	0	0	0		A0A087WYN9;Q7Z478	DHX29	0	0	0	0.303628	0.406975	0	0	0.289397	0	0	0
A0A087WZ62;Q9H6U8;Q9H6U8-3	ENSG00000258529;ALG9;ALG9	0	0	0.222049	0	0.418777	0	0	0	0.359175	0	0		A0A087WYF2;F5H2F2;P54687;P54687-2;P54687-3;P54687-4;P54687-5	BCAT1	0	0	0	0	0.39776	0.253212	0	0	0	0	0.349028		A0A087WYP2;Q8IZQ5	SELENOH	0	1	0	0	0	0	0	0	0	0	0
A0A087WZ97;A0A087WZK6;A0A087X2C2;Q5T7M9	DIPK1A	0	0	0	0	0	0.274242	0	0	0.725758	0	0		A0A087WYF7;Q6UXV4	APOOL	0	0.148583	0	0	0	0	0	0.851417	0	0	0		A0A087WYR0;P09132	SRP19	0	0	0	0	1	0	0	0	0	0	0
A0A087WZB5	PARVB	0	1	0	0	0	0	0	0	0	0	0		A0A087WYJ2;M0QZR8;M0R2B7;P28340	POLD1	0	1	0	0	0	0	0	0	0	0	0		A0A087WYS3;Q9ULU4;Q9ULU4-10;Q9ULU4-11;Q9ULU4-12;Q9ULU4-13;Q9ULU4-19;Q9ULU4-22;Q9ULU4-7;Q9ULU4-8;Q9ULU4-9	ZMYND8	0	0	0	0	0	0	1	0	0	0	0
A0A087WZC2;A0A0C4DGS8;E0YMJ8;P35680;P35680-2;P35680-3;P35680-4	HNF1B	0	0.408462	0	0	0	0	0	0	0	0.320142	0.271396		A0A087WYL6;A0A087WZG6;A0A087X1S9;Q8TEW8;Q8TEW8-2;Q8TEW8-3;Q8TEW8-5;Q8TEW8-6;R4GN62	PARD3B	NaN	NaN	NaN	NaN	NaN	NaN	NaN	NaN	NaN	NaN	NaN		A0A087WYT3;Q15185;Q15185-4	PTGES3	0.398631	0	0	0	0	0	0.601369	0	0	0	0
A0A087WZE9	HMGN3	0	0.7751	0.2249	0	0	0	0	0	0	0	0		A0A087WYM1;C9JRR9;P42575;P42575-2;P42575-3	CASP2	0	0	1	0	0	0	0	0	0	0	0		A0A087WYV9;A0A087X1F5;P57105	SYNJ2BP-COX16;SYNJ2BP-COX16;SYNJ2BP	0	0	0	0	0	0	0	1	0	0	0
A0A087WZG4;A0A3B3IPE9;A0A590UK10;Q6ZSZ5;Q6ZSZ5-1;Q6ZSZ5-2;Q6ZSZ5-5;Q6ZSZ5-6	ARHGEF18	0	0	0.24414	0	0	0	0.75586	0	0	0	0		A0A087WYM3;A0A0A0MRF5;E7EWX6;Q8IXJ6;Q8IXJ6-2;Q8IXJ6-3;Q8IXJ6-4	SIRT2	NaN	NaN	NaN	NaN	NaN	NaN	NaN	NaN	NaN	NaN	NaN		A0A087WYX8;A0A1W2PQW0;A0A590UJL7;A0A5F9ZH12;A0A5F9ZHT2;A0A6Q8PH73;Q14CM0	FRMPD4	0	0.436738	0	0	0	0	0	0.563262	0	0	0
A0A087WZK9;B3KS98;O15372	EIF3H	0.64479	0	0	0	0	0.35521	0	0	0	0	0		A0A087WYM5;A0A494C058;A0A494C075;A0A494C0M8;A0A494C171;A0A494C1C3;Q9BVV6;Q9BVV6-2;Q9BVV6-3;Q9BVV6-4	KIAA0586	0	0	0	0	0	0	0	1	0	0	0		A0A087WYY0;A0A087X260;B1AKP7;G3V162;Q13148	TARDBP	0	1	0	0	0	0	0	0	0	0	0
A0A087WZM2;D6REQ6;D6RHI9;O00584	RNASET2	0	0	0	0	0	0	0	0	0	1	0		A0A087WYN9;Q7Z478	DHX29	0	0	0	1	0	0	0	0	0	0	0		A0A087WZ13;E9PAU2;Q8IY67;Q8IY67-2	RAVER1	0	0	0	0	0	0	1	0	0	0	0
A0A087WZM8;Q8TBM7;Q8TBM7-2;Q8TBM7-3	TMEM254	0	0	0	0	0.497233	0	0	0	0.502767	0	0		A0A087WYP2;Q8IZQ5	SELENOH	0	0	0	0	0	0	1	0	0	0	0		A0A087WZ32;A8K727;Q9HB19	PLEKHA2	0	0	0	0	0	0	1	0	0	0	0
A0A087WZN1;O43837	IDH3B	0	0	0	0	0	0	0	1	0	0	0		A0A087WYR0;P09132	SRP19	0	0	0	0	1	0	0	0	0	0	0		A0A087WZ40;Q14244;Q14244-6;Q14244-7	MAP7	0	0	0	0	0	0	1	0	0	0	0
A0A087WZP9	LIME1	0	0	0	0	1	0	0	0	0	0	0		A0A087WYS3;Q9ULU4;Q9ULU4-10;Q9ULU4-11;Q9ULU4-12;Q9ULU4-13;Q9ULU4-19;Q9ULU4-22;Q9ULU4-7;Q9ULU4-8;Q9ULU4-9	ZMYND8	0	0	0	0	0	0	1	0	0	0	0		A0A087WZ62;Q9H6U8;Q9H6U8-3	ENSG00000258529;ALG9;ALG9	0	0	0	0	1	0	0	0	0	0	0
A0A087WZQ7;Q9H115	NAPB	0	0	0	0	0	0	0	0	1	0	0		A0A087WYT3;Q15185;Q15185-4	PTGES3	0	0	0	0	0	0	1	0	0	0	0		A0A087WZ97;A0A087WZK6;A0A087X2C2;Q5T7M9	DIPK1A	0	0	0	0	0	0.204665	0	0	0.795335	0	0
A0A087WZT0;M0QY61;M0QZ22;M0R0X3;Q5PRF9	SAMD4B	0	0	0	0	0	0.389464	0	0	0.610536	0	0		A0A087WYV9;A0A087X1F5;P57105	SYNJ2BP-COX16;SYNJ2BP-COX16;SYNJ2BP	0	0	0	0	0	0	0	1	0	0	0		A0A087WZB5	PARVB	NaN	NaN	NaN	NaN	NaN	NaN	NaN	NaN	NaN	NaN	NaN
A0A087WZT2;Q6UX53	METTL7B	0	0	0.394364	0	0.605636	0	0	0	0	0	0		A0A087WYX8;A0A1W2PQW0;A0A590UJL7;A0A5F9ZH12;A0A5F9ZHT2;A0A6Q8PH73;Q14CM0	FRMPD4	0	0	0.553732	0	0	0.446268	0	0	0	0	0		A0A087WZC1;Q6IN84;Q6IN84-2	MRM1	0	0.378734	0	0	0	0	0	0.621266	0	0	0
A0A087WZT3;Q9H3K6	BOLA2B	0.588374	0	0	0	0	0	0	0	0	0	0.411626		A0A087WYY0;A0A087X260;B1AKP7;G3V162;Q13148	TARDBP	0	1	0	0	0	0	0	0	0	0	0		A0A087WZC2;A0A0C4DGS8;E0YMJ8;P35680;P35680-2;P35680-3;P35680-4	HNF1B	0	1	0	0	0	0	0	0	0	0	0
A0A087WZU2;E5RGN0;Q00536;Q00536-2;Q00536-3	CDK16	0	0	0	0	0	0	1	0	0	0	0		A0A087WZ13;E9PAU2;Q8IY67;Q8IY67-2	RAVER1	0	0	0	0	0	0	1	0	0	0	0		A0A087WZE9	HMGN3	0	1	0	0	0	0	0	0	0	0	0
A0A087WZU5;O43657	TSPAN6	NaN	NaN	NaN	NaN	NaN	NaN	NaN	NaN	NaN	NaN	NaN		A0A087WZ32;A8K727;Q9HB19	PLEKHA2	0	0	0	0	0	0	1	0	0	0	0		A0A087WZG4;A0A3B3IPE9;A0A590UK10;Q6ZSZ5;Q6ZSZ5-1;Q6ZSZ5-2;Q6ZSZ5-5;Q6ZSZ5-6	ARHGEF18	0	0	0	0	0	0	1	0	0	0	0
A0A087WZV0;O43314	PPIP5K2	0	1	0	0	0	0	0	0	0	0	0		A0A087WZ40;Q14244;Q14244-6;Q14244-7	MAP7	0	0	0	0	0	0	1	0	0	0	0		A0A087WZJ5	COL25A1	0	0	0	0	0	0	0	1	0	0	0
A0A087WZY5;A8MXH5;F5H3Q5;F5H851;Q14031;Q14031-2	COL4A6	0	0	0	0	1	0	0	0	0	0	0		A0A087WZ50;Q8TCT7;Q8TCT7-2;Q8TCT7-4	SPPL2B	0	0	0	0	0	0	1	0	0	0	0		A0A087WZK0;M0R1T4;P49366;P49366-2;P49366-3	DHPS	0	1	0	0	0	0	0	0	0	0	0
A0A087X011;E9PES4;J3KPF9;Q9Y496	KIF3A	0.633789	0	0	0	0	0.366211	0	0	0	0	0		A0A087WZ62;Q9H6U8;Q9H6U8-3	ENSG00000258529;ALG9;ALG9	0	0	0	0	1	0	0	0	0	0	0		A0A087WZK9;B3KS98;O15372	EIF3H	0.616387	0	0	0	0	0.383613	0	0	0	0	0
A0A087X020;Q9Y3A5	SBDS	NaN	NaN	NaN	NaN	NaN	NaN	NaN	NaN	NaN	NaN	NaN		A0A087WZ97;A0A087WZK6;A0A087X2C2;Q5T7M9	DIPK1A	0	0	0	0	0	0	0	0	1	0	0		A0A087WZM2;D6REQ6;D6RHI9;O00584	RNASET2	0	0	0	0	0.664124	0	0	0.335876	0	0	0
A0A087X080;A0A0U1RRH1;A0A0X1KG73;Q15413;Q15413-2;Q15413-3	RYR3	0	0	0.51516	0	0	0	0	0	0.48484	0	0		A0A087WZB5	PARVB	NaN	NaN	NaN	NaN	NaN	NaN	NaN	NaN	NaN	NaN	NaN		A0A087WZM8;Q8TBM7;Q8TBM7-2;Q8TBM7-3	TMEM254	0	0	0	0	0.625001	0	0	0	0	0	0.374999
A0A087X091	WDR13	0	0	0	0	0	0.373029	0	0	0.626971	0	0		A0A087WZC1;Q6IN84;Q6IN84-2	MRM1	0	0.419462	0	0	0	0	0	0.580538	0	0	0		A0A087WZN1;O43837	IDH3B	0	0	0	0	0	0	0	1	0	0	0
A0A087X0D5;P09668	CTSH	0	0	0	0.577296	0	0	0	0	0	0.422704	0		A0A087WZC2;A0A0C4DGS8;E0YMJ8;P35680;P35680-2;P35680-3;P35680-4	HNF1B	0	1	0	0	0	0	0	0	0	0	0		A0A087WZP9	LIME1	0	0.195233	0	0	0.36562	0	0	0	0	0.241927	0.197221
A0A087X0F1;Q9UK61;Q9UK61-2;Q9UK61-3;Q9UK61-4	TASOR	0	1	0	0	0	0	0	0	0	0	0		A0A087WZE9	HMGN3	0	1	0	0	0	0	0	0	0	0	0		A0A087WZQ7;Q9H115	NAPB	0	0	0	0	0	0.263744	0	0	0.736256	0	0
A0A087X0H8;Q15714;Q15714-2;Q15714-3	TSC22D1	0.649948	0.350052	0	0	0	0	0	0	0	0	0		A0A087WZG4;A0A3B3IPE9;A0A590UK10;Q6ZSZ5;Q6ZSZ5-1;Q6ZSZ5-2;Q6ZSZ5-5;Q6ZSZ5-6	ARHGEF18	0	0	0	0	0	0	1	0	0	0	0		A0A087WZT0;M0QY61;M0QZ22;M0R0X3;Q5PRF9	SAMD4B	0	0	0	0	0	0.53548	0	0	0.46452	0	0
A0A087X0H9;Q5T8P6	RBM26	0	1	0	0	0	0	0	0	0	0	0		A0A087WZJ5	COL25A1	0	0	0	0.473314	0	0	0	0.288709	0	0	0.237977		A0A087WZT2;Q6UX53	METTL7B	0	0	0.540205	0	0.459795	0	0	0	0	0	0
A0A087X0K0;P39059	COL15A1	0	1	0	0	0	0	0	0	0	0	0		A0A087WZK0;M0R1T4;P49366;P49366-2;P49366-3	DHPS	0	0	0	0	0	0	0	0	0	0.441074	0.558926		A0A087WZT3;Q9H3K6	BOLA2B	0	0	0	0	0	0	1	0	0	0	0
A0A087X0K4;Q7Z408;Q7Z408-2;Q7Z408-4	CSMD2	0	1	0	0	0	0	0	0	0	0	0		A0A087WZK9;B3KS98;O15372	EIF3H	0.640709	0	0	0	0	0.359291	0	0	0	0	0		A0A087WZU2;E5RGN0;Q00536;Q00536-2;Q00536-3	CDK16	0	0	0	0	0	0	1	0	0	0	0
A0A087X0K9	TJP1	0	0.384905	0	0	0	0	0	0	0	0.294117	0.320978		A0A087WZM2;D6REQ6;D6RHI9;O00584	RNASET2	0	0.494438	0	0	0	0	0	0	0	0.505562	0		A0A087WZU5;O43657	TSPAN6	0	0	0	0	0	0	0	0	1	0	0
A0A087X0L7;E7EVY0;J3KNA0;Q15070;Q15070-2	OXA1L	0	0	0	0	0	0	0	1	0	0	0		A0A087WZM8;Q8TBM7;Q8TBM7-2;Q8TBM7-3	TMEM254	0	0	0	0	0.502797	0	0	0	0	0	0.497203		A0A087WZV0;O43314	PPIP5K2	NaN	NaN	NaN	NaN	NaN	NaN	NaN	NaN	NaN	NaN	NaN
A0A087X0M4;Q9BWU0	SLC4A1AP	0.652857	0.347143	0	0	0	0	0	0	0	0	0		A0A087WZN1;O43837	IDH3B	0	0	0	0	0	0	0	1	0	0	0		A0A087WZY2;A6NIV2;Q9P0U1	TOMM7	NaN	NaN	NaN	NaN	NaN	NaN	NaN	NaN	NaN	NaN	NaN
A0A087X0P0	CENPE	0	0.341531	0	0	0	0	0	0.658469	0	0	0		A0A087WZP9	LIME1	0	0	0	0	0.643989	0	0	0	0	0	0.356011		A0A087WZY5;A8MXH5;F5H3Q5;F5H851;Q14031;Q14031-2	COL4A6	0	0	0	0.266363	0.529149	0	0	0	0	0	0.204488
A0A087X0Q9;Q9BVL4	SELENOO	NaN	NaN	NaN	NaN	NaN	NaN	NaN	NaN	NaN	NaN	NaN		A0A087WZQ7;Q9H115	NAPB	0	0	0	0	0	0	0	0	0.455859	0	0.544141		A0A087X011;E9PES4;J3KPF9;Q9Y496	KIF3A	NaN	NaN	NaN	NaN	NaN	NaN	NaN	NaN	NaN	NaN	NaN
A0A087X0R6;Q9UMY4;Q9UMY4-1	SNX12	0	0	0	0	0	0	1	0	0	0	0		A0A087WZT0;M0QY61;M0QZ22;M0R0X3;Q5PRF9	SAMD4B	0	0	0	0	0	0.428806	0	0	0.571194	0	0		A0A087X020;Q9Y3A5	SBDS	0	0	0	0	0	1	0	0	0	0	0
A0A087X0R7;Q9H4L4	SENP3-EIF4A1;SENP3	0	1	0	0	0	0	0	0	0	0	0		A0A087WZT2;Q6UX53	METTL7B	0	0	0.547721	0	0	0	0	0	0	0.452279	0		A0A087X080;A0A0U1RRH1;A0A0X1KG73;Q15413;Q15413-2;Q15413-3	RYR3	1	0	0	0	0	0	0	0	0	0	0
A0A087X0R9;B8ZZK1;Q07837;Q07837-2;Q07837-5;Q07837-6;Q07837-7	SLC3A1	0	0	0.298479	0	0	0	0	0	0	0.378057	0.323464		A0A087WZT3;Q9H3K6	BOLA2B	0	0	0	0	0	0	1	0	0	0	0		A0A087X091	WDR13	0.449049	0	0	0	0	0	0.550951	0	0	0	0
A0A087X0S5;P12109	COL6A1	0	1	0	0	0	0	0	0	0	0	0		A0A087WZU2;E5RGN0;Q00536;Q00536-2;Q00536-3	CDK16	0	0	0	0	0	0	1	0	0	0	0		A0A087X0D5;P09668	CTSH	0	0	0	0	0.55238	0	0	0	0	0.44762	0
A0A087X0T5;Q96AB6	NTAN1	1	0	0	0	0	0	0	0	0	0	0		A0A087WZU5;O43657	TSPAN6	0	0	0	0	0	1	0	0	0	0	0		A0A087X0F1;Q9UK61;Q9UK61-2;Q9UK61-3;Q9UK61-4	TASOR	0	0.698662	0	0	0	0	0	0.301338	0	0	0
A0A087X0V5;P29728;P29728-2	OAS2	0	0	1	0	0	0	0	0	0	0	0		A0A087WZV0;O43314	PPIP5K2	0	1	0	0	0	0	0	0	0	0	0		A0A087X0H5;P10912;P10912-4	GHR	0	0	0	0	0	0	0	0	0	0	1
A0A087X0W8;Q04206;Q04206-2;Q04206-3;Q04206-4;Q2TAM5	RELA	0	0	0	0	0	0	1	0	0	0	0		A0A087WZY2;A6NIV2;Q9P0U1	TOMM7	NaN	NaN	NaN	NaN	NaN	NaN	NaN	NaN	NaN	NaN	NaN		A0A087X0H8;Q15714;Q15714-2;Q15714-3	TSC22D1	0	0	0.242352	0	0	0	0.757648	0	0	0	0
A0A087X0W9;Q8N6M0	OTUD6B	0.733199	0	0	0	0	0.266801	0	0	0	0	0		A0A087WZY5;A8MXH5;F5H3Q5;F5H851;Q14031;Q14031-2	COL4A6	0	0	0	0	0	0	0	0	1	0	0		A0A087X0H9;Q5T8P6	RBM26	0	1	0	0	0	0	0	0	0	0	0
A0A087X0X3;P52272;P52272-2	HNRNPM	0	1	0	0	0	0	0	0	0	0	0		A0A087X011;E9PES4;J3KPF9;Q9Y496	KIF3A	1	0	0	0	0	0	0	0	0	0	0		A0A087X0K0;P39059	COL15A1	0	0.279523	0.372781	0	0	0	0	0	0	0	0.347696
A0A087X0Y2;A0A087X248;A0A087X2I9;A0A096LPD8;F5GWV3;F5H3N7;F5H8B4;O14607;O14607-2;O14607-3;O14607-4;O14607-5	UTY	0	1	0	0	0	0	0	0	0	0	0		A0A087X020;Q9Y3A5	SBDS	NaN	NaN	NaN	NaN	NaN	NaN	NaN	NaN	NaN	NaN	NaN		A0A087X0K4;Q7Z408;Q7Z408-2;Q7Z408-4	CSMD2	0	0.585269	0	0	0	0	0	0.414731	0	0	0
A0A087X108	ATP13A5	0.351271	0	0	0	0	0	0.648729	0	0	0	0		A0A087X080;A0A0U1RRH1;A0A0X1KG73;Q15413;Q15413-2;Q15413-3	RYR3	0	0	1	0	0	0	0	0	0	0	0		A0A087X0K9	TJP1	0	0.354915	0	0	0	0	0	0	0	0	0.645085
A0A087X117;A0A0G2JN29;Q15155	NOMO1	0	0	0	0	0.674691	0	0	0.325309	0	0	0		A0A087X091	WDR13	0	0	0	0	0	0.330395	0	0	0.669605	0	0		A0A087X0L7;E7EVY0;J3KNA0;Q15070;Q15070-2	OXA1L	0	0	0	0	0	0	0	1	0	0	0
A0A087X138;Q8TF71	SLC16A10	0	0	0.282647	0	0	0	0	0	0	0.370762	0.346591		A0A087X0D5;P09668	CTSH	0	0	0	0	0	0	0	0	0	1	0		A0A087X0M4;Q9BWU0	SLC4A1AP	0.352152	0	0	0	0	0	0.647848	0	0	0	0
A0A087X1A8;A0A2R8Y3X7;D3VVH9;F5H211;G3V3R7;P54252;P54252-1;P54252-4	ATXN3	0	0	0	0	0	0	1	0	0	0	0		A0A087X0F1;Q9UK61;Q9UK61-2;Q9UK61-3;Q9UK61-4	TASOR	0	1	0	0	0	0	0	0	0	0	0		A0A087X0N2;A0A3B3ISI6;O15243	LEPROT	0	0	0	0	0.372959	0	0	0	0.243983	0	0.383058
A0A087X1B2	USP39	0	1	0	0	0	0	0	0	0	0	0		A0A087X0H7;A0A669KAW5;A0A669KB51;A0A6E1W401;Q8NEL9;Q8NEL9-2;Q8NEL9-3;Q8NEL9-4	DDHD1	0	0	1	0	0	0	0	0	0	0	0		A0A087X0P0	CENPE	0	0	0	0	0	0	0	0	1	0	0
A0A087X1B6;E9PEG3;F5GZG9;P10275;P10275-3;P10275-4	AR	0	0	0	0	0	0	1	0	0	0	0		A0A087X0H8;Q15714;Q15714-2;Q15714-3	TSC22D1	0	0	0	0	0	0	1	0	0	0	0		A0A087X0Q9;Q9BVL4	SELENOO	0	0	0	0	0	0	1	0	0	0	0
A0A087X1E4;P53365;P53365-3	ARFIP2	0.498509	0	0	0	0	0	0.501491	0	0	0	0		A0A087X0H9;Q5T8P6	RBM26	0	1	0	0	0	0	0	0	0	0	0		A0A087X0R6;Q9UMY4;Q9UMY4-1	SNX12	0	0	0	0	0	0	1	0	0	0	0
A0A087X1G1;H7BYD0;Q16718;Q16718-2	NDUFA5	0	0	0	0	0	0	0	1	0	0	0		A0A087X0K0;P39059	COL15A1	0	0.586703	0	0	0	0	0	0.413297	0	0	0		A0A087X0R7;Q9H4L4	SENP3-EIF4A1;SENP3	0	1	0	0	0	0	0	0	0	0	0
A0A087X1G4	NUDT13	0	0	0	0	0	0	0	0	0	1	0		A0A087X0K4;Q7Z408;Q7Z408-2;Q7Z408-4	CSMD2	0	0.654594	0	0	0	0	0	0	0	0	0.345406		A0A087X0R9;B8ZZK1;Q07837;Q07837-2;Q07837-5;Q07837-6;Q07837-7	SLC3A1	0	0	0	0	0.447508	0	0	0	0	0	0.552492
A0A087X1J2	C16orf72	0	0	0	0	0	0	0	1	0	0	0		A0A087X0K9	TJP1	0	0	0	0	0.430075	0	0	0	0	0	0.569925		A0A087X0S5;P12109	COL6A1	0	1	0	0	0	0	0	0	0	0	0
A0A087X1J7;P22352	GPX3	0	0.383705	0	0	0	0	0	0.616295	0	0	0		A0A087X0L7;E7EVY0;J3KNA0;Q15070;Q15070-2	OXA1L	0	0	0	0	0	0	0	1	0	0	0		A0A087X0T5;Q96AB6	NTAN1	0.674325	0	0	0	0	0.325675	0	0	0	0	0
A0A087X1K1;Q96C00	ZBTB9	0	0	0.514562	0	0	0	0	0	0.485438	0	0		A0A087X0M4;Q9BWU0	SLC4A1AP	0	0	0	0	0	0	1	0	0	0	0		A0A087X0V5;P29728;P29728-2	OAS2	NaN	NaN	NaN	NaN	NaN	NaN	NaN	NaN	NaN	NaN	NaN
A0A087X1N3;F8WC38;O75818;O75818-2	RPP40	0.701851	0	0	0	0	0	0	0	0	0	0.298149		A0A087X0P0	CENPE	0	0.426851	0	0	0	0	0	0	0.573149	0	0		A0A087X0W8;Q04206;Q04206-2;Q04206-3;Q04206-4;Q2TAM5	RELA	0	0	0	0	0	0	1	0	0	0	0
A0A087X1N7;P20929;P20929-2;P20929-3;P20929-4	NEB	0	0	0	0	0	0	0	0	1	0	0		A0A087X0Q9;Q9BVL4	SELENOO	0	0	0	0	0	0	1	0	0	0	0		A0A087X0W9;Q8N6M0	OTUD6B	0.511547	0	0	0	0	0	0.488453	0	0	0	0
A0A087X1P3;C9IYE1;F8W8P5;H7BYR4;Q86UW7;Q86UW7-2;Q86UW7-3	CADPS2	0	0	0	0	0	0	0	0	1	0	0		A0A087X0R6;Q9UMY4;Q9UMY4-1	SNX12	0	0	0	0	0	0	1	0	0	0	0		A0A087X0X3;P52272;P52272-2	HNRNPM	0	1	0	0	0	0	0	0	0	0	0
A0A087X1P5;J3KQ41;J3QT95;Q9H9Q2;Q9H9Q2-3	COPS7B	0	1	0	0	0	0	0	0	0	0	0		A0A087X0R7;Q9H4L4	SENP3-EIF4A1;SENP3	0	1	0	0	0	0	0	0	0	0	0		A0A087X0Y2;A0A087X248;A0A087X2I9;A0A096LPD8;F5GWV3;F5H3N7;F5H8B4;O14607;O14607-2;O14607-3;O14607-4;O14607-5	UTY	0	0.353723	0	0	0	0	0	0	0.646277	0	0
A0A087X1R3;A0A0C4DGX0;A6QL64;Q8N2N9	ANKRD36B;ANKRD36B;ANKRD36;ANKRD36B	0	0	0	0	0	0	1	0	0	0	0		A0A087X0R9;B8ZZK1;Q07837;Q07837-2;Q07837-5;Q07837-6;Q07837-7	SLC3A1	0	0	0	0	0.559385	0	0	0	0	0	0.440615		A0A087X108	ATP13A5	0	0	0	0	0	0	1	0	0	0	0
A0A087X1S3	HUWE1	0	0	0	0	0	0.397674	0	0	0.602326	0	0		A0A087X0S5;P12109	COL6A1	0	0.583089	0	0	0	0	0	0.416911	0	0	0		A0A087X117;A0A0G2JN29;Q15155	NOMO1	0	0	0	0	0	0	0	0.757036	0	0	0.242964
A0A087X1W8;A0A0A0MTJ8;Q9BY67;Q9BY67-3;Q9BY67-4;Q9BY67-5;X5DQS5	CADM1	0	0	0	0	0	0	0	0	0	0	1		A0A087X0T5;Q96AB6	NTAN1	NaN	NaN	NaN	NaN	NaN	NaN	NaN	NaN	NaN	NaN	NaN		A0A087X138;Q8TF71	SLC16A10	0	0	0.532913	0	0	0	0	0	0	0	0.467087
A0A087X1Z1;A0A0G2JPW5;A0A0G2JQX1;A0A0G2JSA7;Q96RT8;Q96RT8-2	TUBGCP5	0	0	1	0	0	0	0	0	0	0	0		A0A087X0V5;P29728;P29728-2	OAS2	NaN	NaN	NaN	NaN	NaN	NaN	NaN	NaN	NaN	NaN	NaN		A0A087X1A8;A0A2R8Y3X7;D3VVH9;F5H211;G3V3R7;P54252;P54252-1;P54252-4	ATXN3	0	0	0	0	0	0	1	0	0	0	0
A0A087X1Z3;Q9UL46	PSME2	0.427249	0	0	0	0	0	0.572751	0	0	0	0		A0A087X0W8;Q04206;Q04206-2;Q04206-3;Q04206-4;Q2TAM5	RELA	0	0	0	0	0	0	1	0	0	0	0		A0A087X1B2	USP39	0	1	0	0	0	0	0	0	0	0	0
A0A087X236;A0A0A0MRE2;C9J2A8;Q9NVP4;Q9NVP4-2;Q9NVP4-3;Q9NVP4-4;Q9NVP4-5	DZANK1	0	0	0	0	0	0	0	0.55819	0	0	0.44181		A0A087X0W9;Q8N6M0	OTUD6B	1	0	0	0	0	0	0	0	0	0	0		A0A087X1B6;E9PEG3;F5GZG9;P10275;P10275-3;P10275-4	AR	0.60811	0	0	0	0	0	0	0	0.39189	0	0
A0A087X241;Q2NKQ1;Q2NKQ1-3;Q2NKQ1-4	SGSM1	NaN	NaN	NaN	NaN	NaN	NaN	NaN	NaN	NaN	NaN	NaN		A0A087X0X3;P52272;P52272-2	HNRNPM	0	1	0	0	0	0	0	0	0	0	0		A0A087X1E4;P53365;P53365-3	ARFIP2	0.425861	0	0	0	0	0.271544	0	0	0.302595	0	0
A0A087X256;Q2M389	WASHC4	0	0	0	0	0	1	0	0	0	0	0		A0A087X0Y2;A0A087X248;A0A087X2I9;A0A096LPD8;F5GWV3;F5H3N7;F5H8B4;O14607;O14607-2;O14607-3;O14607-4;O14607-5	UTY	0	0.249571	0.482848	0	0	0	0	0	0.267582	0	0		A0A087X1G1;H7BYD0;Q16718;Q16718-2	NDUFA5	0	0	0	0	0	0	0	1	0	0	0
A0A087X266;Q9BXJ8	TMEM120A	0	0	0	0	0	1	0	0	0	0	0		A0A087X108	ATP13A5	0	0	0	0	0	0	1	0	0	0	0		A0A087X1G4	NUDT13	0	0	0.292556	0	0	0	0	0	0.363583	0	0.343862
A0A087X279;P09913	IFIT2	0	0	0	0	0	0	1	0	0	0	0		A0A087X117;A0A0G2JN29;Q15155	NOMO1	0	0	0	0.635215	0	0	0	0.364785	0	0	0		A0A087X1J2	C16orf72	0	0	0	0	0	0	0	1	0	0	0
A0A087X294;O75914;O75914-2;O75914-3;O75914-4	PAK3	0	0	0	0	0	0	1	0	0	0	0		A0A087X127	ZMIZ2	0	0	0	0	0	0	0	0.387638	0.612362	0	0		A0A087X1J7;P22352	GPX3	0	0.530859	0	0.469141	0	0	0	0	0	0	0
A0A087X295;E9PDU5;Q9NNW5	WDR6	0	0	0	0	0	0	1	0	0	0	0		A0A087X138;Q8TF71	SLC16A10	0	0	0	0	0	0	0	0	0	0	1		A0A087X1K1;Q96C00	ZBTB9	0	0	0	0	0	0.342114	0	0	0.657886	0	0
A0A087X296;P23219;P23219-2;P23219-3;P23219-4;P23219-5;P23219-6	PTGS1	0	0	0	0	0	0	0	0.660015	0	0	0.339985		A0A087X1A8;A0A2R8Y3X7;D3VVH9;F5H211;G3V3R7;P54252;P54252-1;P54252-4	ATXN3	0	0	0	0	0	0	1	0	0	0	0		A0A087X1N0;Q9H3C7	GGNBP2	0	0	0	0	0	0	0	0	0.445435	0	0.554565
A0A087X2A7;H0YBA5;H7BY63;Q8NB25;Q8NB25-2;Q8NB25-3;Q8NB25-4	FAM184A	0	0	0	0	0	0	0	0	0.645709	0.354291	0		A0A087X1B2	USP39	0	1	0	0	0	0	0	0	0	0	0		A0A087X1N3;F8WC38;O75818;O75818-2	RPP40	NaN	NaN	NaN	NaN	NaN	NaN	NaN	NaN	NaN	NaN	NaN
A0A087X2B5;P35613;P35613-2	BSG	0	0	0	0	0	0	0	0	0	0.44352	0.55648		A0A087X1B6;E9PEG3;F5GZG9;P10275;P10275-3;P10275-4	AR	0	0	0	0	0	1	0	0	0	0	0		A0A087X1N7;P20929;P20929-2;P20929-3;P20929-4	NEB	0	0	0	0	0	0.301173	0	0	0.698827	0	0
A0A087X2D5;Q9BRJ2	MRPL45	0	0.436415	0	0	0	0	0	0.563585	0	0	0		A0A087X1D0	CD40	0	0.410035	0.269274	0	0	0	0	0	0.320691	0	0		A0A087X1P3;C9IYE1;F8W8P5;H7BYR4;Q86UW7;Q86UW7-2;Q86UW7-3	CADPS2	0	0	0.426759	0	0	0	0	0	0.573241	0	0
A0A087X2D8;O60271-2;O60271-4	SPAG9	0	0	0	0	0	0	1	0	0	0	0		A0A087X1E4;P53365;P53365-3	ARFIP2	0	0	0.592961	0	0	0	0	0	0.407039	0	0		A0A087X1P5;J3KQ41;J3QT95;Q9H9Q2;Q9H9Q2-3	COPS7B	0.321499	0	0	0	0	0	0.678501	0	0	0	0
A0A087X2G6;A0A0C4DGU5;D6RIC3;Q9Y3C1;Q9Y3C1-2;Q9Y3C1-3	NOP16	0	1	0	0	0	0	0	0	0	0	0		A0A087X1G1;H7BYD0;Q16718;Q16718-2	NDUFA5	0	0	0	0	0	0	0	1	0	0	0		A0A087X1R3;A0A0C4DGX0;A6QL64;Q8N2N9	ANKRD36B;ANKRD36B;ANKRD36;ANKRD36B	0.38789	0	0	0	0	0	0.61211	0	0	0	0
A0A087X2I1;P62333	PSMC6	1	0	0	0	0	0	0	0	0	0	0		A0A087X1G4	NUDT13	0	0.251878	0.297011	0	0	0	0	0.451111	0	0	0		A0A087X1S3	HUWE1	0	0	0	0	0	0	0	0	0.554842	0	0.445158
A0A088AWN3;A0A0A0MSY4;Q9BZ29;Q9BZ29-3;Q9BZ29-4;Q9BZ29-5	DOCK9	0	0	0	0.413003	0	0	0	0.586997	0	0	0		A0A087X1J2	C16orf72	0	0	0	0	0	0	0	1	0	0	0		A0A087X1T7;A0A5K1VW97;H0YMF1;P16112;P16112-2;P16112-3	ACAN	0	0	0	0	0	0	0	0	0.586084	0	0.413916
A0A088AWN8;E7EP87;E9PH27;J3KS48;J3KT43;J3QRB0;Q9UHQ1;Q9UHQ1-2;Q9UHQ1-3;Q9UHQ1-4	NARF	0	0	0.361558	0	0	0	0.638442	0	0	0	0		A0A087X1J7;P22352	GPX3	0	0	0	1	0	0	0	0	0	0	0		A0A087X1U5;F5H7T0;F6RJM5;Q96S38;Q96S38-2	RPS6KC1	0.60284	0	0	0	0	0	0	0	0.39716	0	0
A0A090HNM7;A0A1W2PS85;P28715;R4GMW8	ERCC5;BIVM-ERCC5;ERCC5;BIVM-ERCC5	0	0.495966	0	0	0	0.504034	0	0	0	0	0		A0A087X1K1;Q96C00	ZBTB9	0	1	0	0	0	0	0	0	0	0	0		A0A087X1W8;A0A0A0MTJ8;Q9BY67;Q9BY67-3;Q9BY67-4;Q9BY67-5;X5DQS5	CADM1	0	0	0.279461	0.433532	0	0	0	0	0	0	0.287006
A0A096LNH6;Q14185	DOCK1	0	1	0	0	0	0	0	0	0	0	0		A0A087X1N0;Q9H3C7	GGNBP2	0	0	0.255392	0	0	0	0	0	0.275558	0	0.46905		A0A087X1Z1;A0A0G2JPW5;A0A0G2JQX1;A0A0G2JSA7;Q96RT8;Q96RT8-2	TUBGCP5	0.627871	0	0	0.372129	0	0	0	0	0	0	0
A0A096LNV3;A0A096LP02;Q9Y508;Q9Y508-2	RNF114	0	0	0.256509	0	0	0	0	0	0.743491	0	0		A0A087X1N3;F8WC38;O75818;O75818-2	RPP40	0.540306	0	0	0	0	0	0	0.459694	0	0	0		A0A087X1Z3;Q9UL46	PSME2	0.502965	0	0	0	0	0	0.497035	0	0	0	0
A0A096LP07;A0A096LPJ3;A8K070	GPS1	NaN	NaN	NaN	NaN	NaN	NaN	NaN	NaN	NaN	NaN	NaN		A0A087X1N7;P20929;P20929-2;P20929-3;P20929-4	NEB	NaN	NaN	NaN	NaN	NaN	NaN	NaN	NaN	NaN	NaN	NaN		A0A087X241;Q2NKQ1;Q2NKQ1-3;Q2NKQ1-4	SGSM1	0	0.620373	0.379627	0	0	0	0	0	0	0	0
A0A096LP22;A0A096LP34;C9J7Z1;Q86Y79	PTRH1	0	0.676462	0	0	0	0	0	0.323538	0	0	0		A0A087X1P3;C9IYE1;F8W8P5;H7BYR4;Q86UW7;Q86UW7-2;Q86UW7-3	CADPS2	1	0	0	0	0	0	0	0	0	0	0		A0A087X256;Q2M389	WASHC4	NaN	NaN	NaN	NaN	NaN	NaN	NaN	NaN	NaN	NaN	NaN
A0A096LP69	CD99	0	0	0	0	0	0	0	0	0	0.45166	0.54834		A0A087X1P5;J3KQ41;J3QT95;Q9H9Q2;Q9H9Q2-3	COPS7B	0.374074	0	0	0	0	0	0.625926	0	0	0	0		A0A087X266;Q9BXJ8	TMEM120A	0	0	0	0	1	0	0	0	0	0	0
A0A096LPC5;A0A0A0MR88;Q9Y4E1;Q9Y4E1-1;Q9Y4E1-2;Q9Y4E1-6	WASHC2C	0	0	0	0	0	0	0	0	1	0	0		A0A087X1R3;A0A0C4DGX0;A6QL64;Q8N2N9	ANKRD36B;ANKRD36B;ANKRD36;ANKRD36B	1	0	0	0	0	0	0	0	0	0	0		A0A087X279;P09913	IFIT2	0	0	0	0	0	0	1	0	0	0	0
A0A096LPE2	SAA2-SAA4	0	0	0.386906	0	0.613094	0	0	0	0	0	0		A0A087X1S3	HUWE1	0	0	0	0	0	0	0	0	0.467379	0	0.532621		A0A087X283;A0A1B0GX65;B7Z306;C9J180;C9J2P0;H7C061;P51965;P51965-2;P51965-3;Q969T4;Q96LR5;R4GN77;R4GND1	UBE2E2;UBE2E3;UBE2E1;UBE2E2;UBE2E1;UBE2E1;UBE2E1;UBE2E1;UBE2E1;UBE2E3;UBE2E2;UBE2E3;UBE2E3	0	0	0	0	0	0	1	0	0	0	0
A0A096LPI6	ENSG00000276612	0	0	0	0	0	0	0	1	0	0	0		A0A087X1U5;F5H7T0;F6RJM5;Q96S38;Q96S38-2	RPS6KC1	0	0	0	0	0	0.236356	0	0	0.535479	0.228165	0		A0A087X294;O75914;O75914-2;O75914-3;O75914-4	PAK3	0	0	0	0	0	0	1	0	0	0	0
A0A096LPJ4;P05161	ISG15	0	0	0	0	0	0	1	0	0	0	0		A0A087X1W8;A0A0A0MTJ8;Q9BY67;Q9BY67-3;Q9BY67-4;Q9BY67-5;X5DQS5	CADM1	0	0	0	0	0	0	0	0.561778	0	0	0.438222		A0A087X295;E9PDU5;Q9NNW5	WDR6	1	0	0	0	0	0	0	0	0	0	0
A0A096LPJ9;A0A140G945;A0A140G945-2;E7EWH7;P02489	CRYAA2;CRYAA2;CRYAA2;CRYAA;CRYAA	1	0	0	0	0	0	0	0	0	0	0		A0A087X1Z1;A0A0G2JPW5;A0A0G2JQX1;A0A0G2JSA7;Q96RT8;Q96RT8-2	TUBGCP5	0	0	0	0	0	0	0	0	0.43317	0.263571	0.303259		A0A087X296;P23219;P23219-2;P23219-3;P23219-4;P23219-5;P23219-6	PTGS1	0	0	0	0.388077	0	0	0	0.349279	0	0	0.262644
A0A0A0MQR2;Q9BY42	RTF2	0	0	0	0	0	0	1	0	0	0	0		A0A087X1Z3;Q9UL46	PSME2	0.436295	0	0	0	0	0	0.563705	0	0	0	0		A0A087X2A7;H0YBA5;H7BY63;Q8NB25;Q8NB25-2;Q8NB25-3;Q8NB25-4	FAM184A	0	0	0	0	0	0.504206	0	0	0.495794	0	0
A0A0A0MQR4;I3L2J0;Q96RK0	CIC	0	1	0	0	0	0	0	0	0	0	0		A0A087X236;A0A0A0MRE2;C9J2A8;Q9NVP4;Q9NVP4-2;Q9NVP4-3;Q9NVP4-4;Q9NVP4-5	DZANK1	0	0	0	0.346844	0	0	0	0.396783	0	0	0.256373		A0A087X2B2;E9PMH5;Q13490;Q13490-2	BIRC2	0.476853	0	0	0	0	0.229485	0	0	0.293662	0	0
A0A0A0MQS1;Q53H96;Q53H96-2	PYCR3	0	0	1	0	0	0	0	0	0	0	0		A0A087X241;Q2NKQ1;Q2NKQ1-3;Q2NKQ1-4	SGSM1	0	0	0.276877	0	0	0	0	0	0.723123	0	0		A0A087X2B5;P35613;P35613-2	BSG	0	0	0	0	0	0	0	0	0	0.403331	0.596669
A0A0A0MQS9;A0A0A0MTC7;Q16363;Q16363-2	LAMA4	0	0.249322	0	0	0	0	0	0.55758	0	0	0.193098		A0A087X256;Q2M389	WASHC4	0	0	0	0	0	1	0	0	0	0	0		A0A087X2B6	CCAR2	1	0	0	0	0	0	0	0	0	0	0
A0A0A0MQT0;P09455	RBP1	0	0	0	0	0	0	1	0	0	0	0		A0A087X266;Q9BXJ8	TMEM120A	0	0	0	0	1	0	0	0	0	0	0		A0A087X2D5;Q9BRJ2	MRPL45	0	0.465802	0	0	0	0	0	0.534198	0	0	0
A0A0A0MQU0;Q9BV38;U3KQC1	WDR18	0	1	0	0	0	0	0	0	0	0	0		A0A087X279;P09913	IFIT2	0.381122	0	0	0	0	0	0.618878	0	0	0	0		A0A087X2D8;O60271-2;O60271-4	SPAG9	0	0	0	0	0	0	0.650743	0	0.349257	0	0
A0A0A0MQU4;Q96I15	SCLY	0	0	0	0	0	0	1	0	0	0	0		A0A087X283;A0A1B0GX65;B7Z306;C9J180;C9J2P0;H7C061;P51965;P51965-2;P51965-3;Q969T4;Q96LR5;R4GN77;R4GND1	UBE2E2;UBE2E3;UBE2E1;UBE2E2;UBE2E1;UBE2E1;UBE2E1;UBE2E1;UBE2E1;UBE2E3;UBE2E2;UBE2E3;UBE2E3	0	0	0	0	0	0.379496	0	0	0.620504	0	0		A0A087X2G6;A0A0C4DGU5;D6RIC3;Q9Y3C1;Q9Y3C1-2;Q9Y3C1-3	NOP16	0	0.457142	0	0	0	0	0	0	0	0.274809	0.268049
A0A0A0MQU7;A0A0A0MTK8;F5H0K0;P20823;P20823-2;P20823-3;P20823-7;U3KQS6	HNF1A	0	1	0	0	0	0	0	0	0	0	0		A0A087X294;O75914;O75914-2;O75914-3;O75914-4	PAK3	0	0	0	0	0	0	1	0	0	0	0		A0A087X2I1;P62333	PSMC6	1	0	0	0	0	0	0	0	0	0	0
A0A0A0MQV6;P09038;P09038-1;P09038-2;P09038-3	FGF2	0	1	0	0	0	0	0	0	0	0	0		A0A087X295;E9PDU5;Q9NNW5	WDR6	1	0	0	0	0	0	0	0	0	0	0		A0A088AWN3;A0A0A0MSY4;Q9BZ29;Q9BZ29-3;Q9BZ29-4;Q9BZ29-5	DOCK9	0	0	0	0	0	0	0	1	0	0	0
A0A0A0MQX1;D6RGD1;Q9HD67	MYO10	0	0.330328	0	0	0	0	0	0	0	0.359594	0.310078		A0A087X296;P23219;P23219-2;P23219-3;P23219-4;P23219-5;P23219-6	PTGS1	0	0.270465	0	0	0	0	0	0.729535	0	0	0		A0A088AWN8;E7EP87;E9PH27;J3KS48;J3KT43;J3QRB0;Q9UHQ1;Q9UHQ1-2;Q9UHQ1-3;Q9UHQ1-4	NARF	1	0	0	0	0	0	0	0	0	0	0
A0A0A0MQX8;C9JP00;Q9NR56;Q9NR56-2;Q9NR56-5;Q9NR56-6;Q9NR56-7	MBNL1	0	1	0	0	0	0	0	0	0	0	0		A0A087X2A7;H0YBA5;H7BY63;Q8NB25;Q8NB25-2;Q8NB25-3;Q8NB25-4	FAM184A	0	0	1	0	0	0	0	0	0	0	0		A0A088AWP2;A0A0C4DG41;A8MX39;A8MZ24;B5MDW0;P11308;P11308-1;P11308-2;P11308-3;P11308-5;P11308-6	ERG	1	0	0	0	0	0	0	0	0	0	0
A0A0A0MQY7;A0A3B3ISH2;Q5VU97	CACHD1	NaN	NaN	NaN	NaN	NaN	NaN	NaN	NaN	NaN	NaN	NaN		A0A087X2B2;E9PMH5;Q13490;Q13490-2	BIRC2	0	0	0	0	0	0	0	1	0	0	0		A0A088AWP5;E9PDC2;H7BZH9;Q8WUY3;Q8WUY3-2;Q8WUY3-3;Q8WUY3-4	PRUNE2	0	0	0	0.326755	0	0	0	0	0	0	0.673245
A0A0A0MR02;P45880;P45880-1;P45880-2	VDAC2	0	0	0	0	0	0	0	1	0	0	0		A0A087X2B5;P35613;P35613-2	BSG	0	0	0	0	0.493607	0	0	0	0	0	0.506393		A0A090HNM7;A0A1W2PS85;P28715;R4GMW8	ERCC5;BIVM-ERCC5;ERCC5;BIVM-ERCC5	0	1	0	0	0	0	0	0	0	0	0
A0A0A0MR03;A0A0J9YWB6;A0A0J9YWJ4;K7EJD2;Q9Y5B0;Q9Y5B0-4	CTDP1	0	0	0	0	0	0	1	0	0	0	0		A0A087X2D5;Q9BRJ2	MRPL45	0	0.311631	0	0	0	0	0	0.688369	0	0	0		A0A096LNH6;Q14185	DOCK1	0	1	0	0	0	0	0	0	0	0	0
A0A0A0MR05;H3BM50;H3BN58;H3BPT1;H3BPU5;Q9BVC4;Q9BVC4-4;Q9BVC4-5	MLST8	0	0	0	0	0	0	0	0	0	1	0		A0A087X2D8;O60271-2;O60271-4	SPAG9	0	0	0.442704	0	0	0	0	0	0.557296	0	0		A0A096LNV3;A0A096LP02;Q9Y508;Q9Y508-2	RNF114	0	0	0	0	0	0.459723	0	0	0.540277	0	0
A0A0A0MR07;F5H5P4;P15498;P15498-2;Q96D37	VAV1	0.449054	0	0	0	0	0	0.550946	0	0	0	0		A0A087X2G6;A0A0C4DGU5;D6RIC3;Q9Y3C1;Q9Y3C1-2;Q9Y3C1-3	NOP16	0	0.663686	0	0	0	0	0	0.336314	0	0	0		A0A096LP22;A0A096LP34;C9J7Z1;Q86Y79	PTRH1	0	0	0	0	0	0	0	1	0	0	0
A0A0A0MR09;P43378	PTPN9	0	0.282623	0.273419	0.443958	0	0	0	0	0	0	0		A0A087X2I1;P62333	PSMC6	1	0	0	0	0	0	0	0	0	0	0		A0A096LP69	CD99	0	0	0	0	0	0.305579	0	0	0.365755	0	0.328666
A0A0A0MR11;A0A0A0MRS1;Q06730;Q06730-2;Q06730-3	ZNF33A	0	0	0	0	0	0	0	0	0	0.558499	0.441501		A0A088AWN3;A0A0A0MSY4;Q9BZ29;Q9BZ29-3;Q9BZ29-4;Q9BZ29-5	DOCK9	0	0	0	0	0	0	0	1	0	0	0		A0A096LPC5;A0A0A0MR88;Q9Y4E1;Q9Y4E1-1;Q9Y4E1-2;Q9Y4E1-6	WASHC2C	0	0	0	0	0	0.369867	0	0	0.630133	0	0
A0A0A0MR25;A0A5S6RJB7;D2CGD1;E7EVR7;H7BXU9;H7C265;P21802;P21802-15;P21802-16;P21802-17;P21802-18;P21802-2;P21802-20;P21802-21;P21802-22;P21802-23;P21802-3;P21802-4;P21802-5;P21802-6;P21802-8;S4R381	FGFR2	0	0	0	0	0	0.397551	0	0	0.602449	0	0		A0A088AWN8;E7EP87;E9PH27;J3KS48;J3KT43;J3QRB0;Q9UHQ1;Q9UHQ1-2;Q9UHQ1-3;Q9UHQ1-4	NARF	0	0	0	0	0	0.515642	0	0	0.484358	0	0		A0A096LPE2	SAA2-SAA4	0	0	1	0	0	0	0	0	0	0	0
A0A0A0MR36;Q9ULV0-2	MYO5B	NaN	NaN	NaN	NaN	NaN	NaN	NaN	NaN	NaN	NaN	NaN		A0A088AWP2;A0A0C4DG41;A8MX39;A8MZ24;B5MDW0;P11308;P11308-1;P11308-2;P11308-3;P11308-5;P11308-6	ERG	0	0.690144	0.309856	0	0	0	0	0	0	0	0		A0A096LPI6	ENSG00000276612	0	0	0	0	0	0	0	1	0	0	0
A0A0A0MR51;H7C2V0;O60427	FADS1	0	0	0	0	0.650778	0	0	0.349222	0	0	0		A0A088AWP5;E9PDC2;H7BZH9;Q8WUY3;Q8WUY3-2;Q8WUY3-3;Q8WUY3-4	PRUNE2	0.707156	0	0	0	0	0.292844	0	0	0	0	0		A0A096LPJ4;P05161	ISG15	0	0	0	0	0	0	1	0	0	0	0
A0A0A0MR67;A0A0A0MSA1;E9PDI6;F5GY28;F5H522;Q13936;Q13936-10;Q13936-11;Q13936-12;Q13936-13;Q13936-14;Q13936-15;Q13936-16;Q13936-17;Q13936-18;Q13936-19;Q13936-2;Q13936-20;Q13936-21;Q13936-22;Q13936-23;Q13936-24;Q13936-25;Q13936-26;Q13936-27;Q13936-28;Q13936-29;Q13936-3;Q13936-30;Q13936-31;Q13936-32;Q13936-33;Q13936-34;Q13936-35;Q13936-36;Q13936-37;Q13936-4;Q13936-5;Q13936-6;Q13936-7;Q13936-8;Q13936…	CACNA1C	0	0	1	0	0	0	0	0	0	0	0		A0A090HNM7;A0A1W2PS85;P28715;R4GMW8	ERCC5;BIVM-ERCC5;ERCC5;BIVM-ERCC5	NaN	NaN	NaN	NaN	NaN	NaN	NaN	NaN	NaN	NaN	NaN		A0A096LPJ9;A0A140G945;A0A140G945-2;E7EWH7;P02489	CRYAA2;CRYAA2;CRYAA2;CRYAA;CRYAA	0.611277	0	0	0	0	0	0	0	0.388723	0	0
A0A0A0MR74;O75907	DGAT1	0	0	0	0	0.649497	0	0	0	0	0.350503	0		A0A096LNH6;Q14185	DOCK1	0	1	0	0	0	0	0	0	0	0	0		A0A0A0MQR2;Q9BY42	RTF2	0	0	0	0	0	0	1	0	0	0	0
A0A0A0MRA5;B7Z4B8;M0R3F1;Q9BUJ2;Q9BUJ2-2;Q9BUJ2-4	HNRNPUL1	0	1	0	0	0	0	0	0	0	0	0		A0A096LNV3;A0A096LP02;Q9Y508;Q9Y508-2	RNF114	0.634039	0	0	0	0	0.365961	0	0	0	0	0		A0A0A0MQR4;I3L2J0;Q96RK0	CIC	0	1	0	0	0	0	0	0	0	0	0
A0A0A0MRA8;A8K968;Q9Y2J2;Q9Y2J2-2	EPB41L3	0	0	0	0.615725	0	0	0	0	0	0	0.384275		A0A096LP07;A0A096LPJ3;A8K070	GPS1	0	0	0	0.315629	0	0	0	0.373012	0	0	0.311359		A0A0A0MQS1;Q53H96;Q53H96-2	PYCR3	1	0	0	0	0	0	0	0	0	0	0
A0A0A0MRB5;Q8WXG6;Q8WXG6-2;Q8WXG6-3;Q8WXG6-4;Q8WXG6-5;Q8WXG6-6;Q8WXG6-7;Q8WXG6-8	MADD	0.419672	0	0	0	0	0	0.580328	0	0	0	0		A0A096LP22;A0A096LP34;C9J7Z1;Q86Y79	PTRH1	0	0	0	0	0	0	0	1	0	0	0		A0A0A0MQS9;A0A0A0MTC7;Q16363;Q16363-2	LAMA4	0	0.498113	0	0	0	0	0	0	0	0	0.501887
A0A0A0MRD0;A0A2R8YCE3;F5H4B4;F5H4B4-2	FAM227A	0	0	1	0	0	0	0	0	0	0	0		A0A096LP69	CD99	0	0	0.448056	0	0	0	0	0	0	0	0.551944		A0A0A0MQT0;P09455	RBP1	0	0	0	0	0	0	1	0	0	0	0
A0A0A0MRE5;Q9ULH1;Q9ULH1-2	ASAP1	NaN	NaN	NaN	NaN	NaN	NaN	NaN	NaN	NaN	NaN	NaN		A0A096LPC5;A0A0A0MR88;Q9Y4E1;Q9Y4E1-1;Q9Y4E1-2;Q9Y4E1-6	WASHC2C	0	0	0	0	0	0	0	0	1	0	0		A0A0A0MQU0;Q9BV38;U3KQC1	WDR18	0	1	0	0	0	0	0	0	0	0	0
A0A0A0MRF6;Q99996;Q99996-1;Q99996-3;Q99996-5;Q99996-6	AKAP9	NaN	NaN	NaN	NaN	NaN	NaN	NaN	NaN	NaN	NaN	NaN		A0A096LPE2	SAA2-SAA4	0	0	0.562647	0	0	0	0	0	0	0.437353	0		A0A0A0MQU4;Q96I15	SCLY	0	0	0	0	0	0	1	0	0	0	0
A0A0A0MRF9;P16885	PLCG2	0	0	0	0	0	0	1	0	0	0	0		A0A096LPI6	ENSG00000276612	0	0	0	0	0	0	0	1	0	0	0		A0A0A0MQU7;A0A0A0MTK8;F5H0K0;P20823;P20823-2;P20823-3;P20823-7;U3KQS6	HNF1A	0	1	0	0	0	0	0	0	0	0	0
A0A0A0MRG8;Q16611	BAK1	0	0	0	0.512158	0	0	0	0.487842	0	0	0		A0A096LPJ4;P05161	ISG15	0	0	0	0	0	0	1	0	0	0	0		A0A0A0MQV6;P09038;P09038-1;P09038-2;P09038-3	FGF2	0	0.372492	0.313344	0	0	0	0	0	0	0	0.314163
A0A0A0MRH3;Q9Y2W7;Q9Y2W7-2;Q9Y2W7-3	KCNIP3	0	0.467061	0	0.532939	0	0	0	0	0	0	0		A0A096LPJ9;A0A140G945;A0A140G945-2;E7EWH7;P02489	CRYAA2;CRYAA2;CRYAA2;CRYAA;CRYAA	NaN	NaN	NaN	NaN	NaN	NaN	NaN	NaN	NaN	NaN	NaN		A0A0A0MQX1;D6RGD1;Q9HD67	MYO10	0	0	0	0	0	0.322351	0	0	0.38014	0	0.297508
A0A0A0MRI1;Q8IXQ4	GPALPP1	0	0	0	0.366972	0	0	0	0.633028	0	0	0		A0A0A0MQR2;Q9BY42	RTF2	0	0	0	0	0	0	1	0	0	0	0		A0A0A0MQX8;C9JP00;Q9NR56;Q9NR56-2;Q9NR56-5;Q9NR56-6;Q9NR56-7	MBNL1	0	1	0	0	0	0	0	0	0	0	0
A0A0A0MRI2;Q9UNH7	SNX6	0.414096	0	0	0	0	0	0.585904	0	0	0	0		A0A0A0MQR4;I3L2J0;Q96RK0	CIC	0	0	0	0	0	0	1	0	0	0	0		A0A0A0MQY7;A0A3B3ISH2;Q5VU97	CACHD1	0	0	0.457439	0	0	0.542561	0	0	0	0	0
A0A0A0MRJ0;Q5VT25;Q5VT25-2;Q5VT25-3;Q5VT25-4;Q5VT25-5;Q5VT25-6	CDC42BPA	0	0.28202	0.229789	0	0	0	0	0	0	0.220982	0.267209		A0A0A0MQS1;Q53H96;Q53H96-2	PYCR3	0.462613	0	0	0	0	0	0.537387	0	0	0	0		A0A0A0MQZ4;Q8N3J5;V9GY69	PPM1K	0	0	0	0	0	0	0	1	0	0	0
A0A0A0MRJ6	PCMT1	0	0	0	0	0	0	1	0	0	0	0		A0A0A0MQS9;A0A0A0MTC7;Q16363;Q16363-2	LAMA4	0	0.493732	0	0	0	0	0	0.506268	0	0	0		A0A0A0MR02;P45880;P45880-1;P45880-2	VDAC2	0	0	0	0	0	0	0	1	0	0	0
A0A0A0MRJ7;P12259	F5	0	0	0.318821	0	0.681179	0	0	0	0	0	0		A0A0A0MQT0;P09455	RBP1	0	0	0	0	0	0	1	0	0	0	0		A0A0A0MR03;A0A0J9YWB6;A0A0J9YWJ4;K7EJD2;Q9Y5B0;Q9Y5B0-4	CTDP1	0	0	0	0	0	0	0.756506	0	0.243494	0	0
A0A0A0MRM2;Q86VF7;Q86VF7-2;Q86VF7-3;Q86VF7-4	NRAP	0	0	0	0	0	0.480908	0	0	0.519092	0	0		A0A0A0MQU0;Q9BV38;U3KQC1	WDR18	0	1	0	0	0	0	0	0	0	0	0		A0A0A0MR05;H3BM50;H3BN58;H3BPT1;H3BPU5;Q9BVC4;Q9BVC4-4;Q9BVC4-5	MLST8	0	0	0	0	0	0	0	0	1	0	0
A0A0A0MRM9;Q14978;Q14978-2;Q14978-3	NOLC1	0	1	0	0	0	0	0	0	0	0	0		A0A0A0MQU4;Q96I15	SCLY	0	0	0	0	0	0	1	0	0	0	0		A0A0A0MR07;F5H5P4;P15498;P15498-2;Q96D37	VAV1	0.587867	0	0	0	0	0	0	0	0	0	0.412133
A0A0A0MRP6;B7ZLQ5;P28370;P28370-2	SMARCA1	0	0.704092	0	0	0	0	0	0	0	0	0.295908		A0A0A0MQU7;A0A0A0MTK8;F5H0K0;P20823;P20823-2;P20823-3;P20823-7;U3KQS6	HNF1A	0	1	0	0	0	0	0	0	0	0	0		A0A0A0MR09;P43378	PTPN9	0	0	1	0	0	0	0	0	0	0	0
A0A0A0MRR7;P09234	SNRPC	0	1	0	0	0	0	0	0	0	0	0		A0A0A0MQV6;P09038;P09038-1;P09038-2;P09038-3	FGF2	0	0.561573	0	0	0	0	0	0	0	0	0.438427		A0A0A0MR11;A0A0A0MRS1;Q06730;Q06730-2;Q06730-3	ZNF33A	0	0	0.422344	0	0	0	0	0	0.577656	0	0
A0A0A0MRT2;Q9BTA9;Q9BTA9-2;Q9BTA9-5	WAC	0	0	0	0	0	0.583	0	0	0	0.417	0		A0A0A0MQV8	GAPVD1	0	0	0	0	0	0	0	0	0	0.290576	0.709424		A0A0A0MR25;A0A5S6RJB7;D2CGD1;E7EVR7;H7BXU9;H7C265;P21802;P21802-15;P21802-16;P21802-17;P21802-18;P21802-2;P21802-20;P21802-21;P21802-22;P21802-23;P21802-3;P21802-4;P21802-5;P21802-6;P21802-8;S4R381	FGFR2	0.469959	0	0.530041	0	0	0	0	0	0	0	0
A0A0A0MRT6;Q8IZP0;Q8IZP0-2;Q8IZP0-3;Q8IZP0-4;Q8IZP0-5;Q8IZP0-6;Q8IZP0-9	ABI1	NaN	NaN	NaN	NaN	NaN	NaN	NaN	NaN	NaN	NaN	NaN		A0A0A0MQX1;D6RGD1;Q9HD67	MYO10	0	0	0	0	0	0	0	0	0	0	1		A0A0A0MR36;Q9ULV0-2	MYO5B	0	0	0	0	0.749093	0	0	0	0	0	0.250907
A0A0A0MRW6;Q9H6R4;Q9H6R4-2;Q9H6R4-4	NOL6	0	0.725645	0	0	0	0	0	0	0	0	0.274355		A0A0A0MQX8;C9JP00;Q9NR56;Q9NR56-2;Q9NR56-5;Q9NR56-6;Q9NR56-7	MBNL1	0	0.558242	0	0	0	0	0	0	0	0.441758	0		A0A0A0MR51;H7C2V0;O60427	FADS1	0	0	0	0	1	0	0	0	0	0	0
A0A0A0MRX1;A0A0R4J2E6;A0A494C0F8;A0A494C147;A0A494C1D9;B1APY9;P26378;P26378-1;P26378-2;P26378-3;P26378-4;P26378-5;Q12926;Q12926-2	ELAVL2;ELAVL4;ELAVL4;ELAVL4;ELAVL4;ELAVL4;ELAVL4;ELAVL4;ELAVL4;ELAVL4;ELAVL4;ELAVL4;ELAVL2;ELAVL2	NaN	NaN	NaN	NaN	NaN	NaN	NaN	NaN	NaN	NaN	NaN		A0A0A0MQY7;A0A3B3ISH2;Q5VU97	CACHD1	NaN	NaN	NaN	NaN	NaN	NaN	NaN	NaN	NaN	NaN	NaN		A0A0A0MR67;A0A0A0MSA1;E9PDI6;F5GY28;F5H522;Q13936;Q13936-10;Q13936-11;Q13936-12;Q13936-13;Q13936-14;Q13936-15;Q13936-16;Q13936-17;Q13936-18;Q13936-19;Q13936-2;Q13936-20;Q13936-21;Q13936-22;Q13936-23;Q13936-24;Q13936-25;Q13936-26;Q13936-27;Q13936-28;Q13936-29;Q13936-3;Q13936-30;Q13936-31;Q13936-32;Q13936-33;Q13936-34;Q13936-35;Q13936-36;Q13936-37;Q13936-4;Q13936-5;Q13936-6;Q13936-7;Q13936-8;Q13936…	CACNA1C	1	0	0	0	0	0	0	0	0	0	0
A0A0A0MRX8;A0A1B0GWI9;A0A1B0GWJ4;A0A2R8Y7V8;O00712;O00712-4;O00712-5;Q5VW26;Q5VW27;Q5VW30;U3KQE8	NFIB	0	1	0	0	0	0	0	0	0	0	0		A0A0A0MR02;P45880;P45880-1;P45880-2	VDAC2	0	0	0	0	0	0	0	1	0	0	0		A0A0A0MR74;O75907	DGAT1	0	0	0	0	0.516817	0	0	0.483183	0	0	0
A0A0A0MRY0;B0QYI1;Q8WUA7;Q8WUA7-2;Q8WUA7-3;Q8WUA7-4	TBC1D22A	0	0	0	0	0	0	1	0	0	0	0		A0A0A0MR03;A0A0J9YWB6;A0A0J9YWJ4;K7EJD2;Q9Y5B0;Q9Y5B0-4	CTDP1	0	0	0	0	0	0	0.647248	0	0.352752	0	0		A0A0A0MR93;A0A0C4DH11;K7ELZ7;K7ES91;Q53F39;Q53F39-2;Q53F39-3	MPPE1	0	0	0	0	0.535109	0	0	0	0.464891	0	0
A0A0A0MRZ1;Q9H9P5-1;Q9H9P5-3	UNKL	0	0	0	0	0	1	0	0	0	0	0		A0A0A0MR05;H3BM50;H3BN58;H3BPT1;H3BPU5;Q9BVC4;Q9BVC4-4;Q9BVC4-5	MLST8	0.368608	0	0	0	0	0.307601	0	0	0.323791	0	0		A0A0A0MRA5;B7Z4B8;M0R3F1;Q9BUJ2;Q9BUJ2-2;Q9BUJ2-4	HNRNPUL1	0	1	0	0	0	0	0	0	0	0	0
A0A0A0MRZ4;E7EMV7;Q15025;Q15025-2;Q15025-3;Q15025-4;Q15025-5;Q15025-6;Q15025-7;Q15025-8	TNIP1	NaN	NaN	NaN	NaN	NaN	NaN	NaN	NaN	NaN	NaN	NaN		A0A0A0MR07;F5H5P4;P15498;P15498-2;Q96D37	VAV1	1	0	0	0	0	0	0	0	0	0	0		A0A0A0MRA8;A8K968;Q9Y2J2;Q9Y2J2-2	EPB41L3	0	0	0	0.478672	0	0	0	0	0	0	0.521328
A0A0A0MS14	IGHV1-45	0	0	1	0	0	0	0	0	0	0	0		A0A0A0MR09;P43378	PTPN9	0	0	1	0	0	0	0	0	0	0	0		A0A0A0MRB5;Q8WXG6;Q8WXG6-2;Q8WXG6-3;Q8WXG6-4;Q8WXG6-5;Q8WXG6-6;Q8WXG6-7;Q8WXG6-8	MADD	0.470967	0	0	0	0	0.259251	0	0	0.269781	0	0
A0A0A0MS59;A0A0C4DFX4;Q6ZRS2;Q6ZRS2-2;Q6ZRS2-3	SRCAP;ENSG00000282034;SRCAP;SRCAP;SRCAP	0	1	0	0	0	0	0	0	0	0	0		A0A0A0MR11;A0A0A0MRS1;Q06730;Q06730-2;Q06730-3	ZNF33A	0.714719	0	0	0	0	0	0	0	0.285281	0	0		A0A0A0MRD0;A0A2R8YCE3;F5H4B4;F5H4B4-2	FAM227A	0	1	0	0	0	0	0	0	0	0	0
A0A0A0MS79;O14513	NCKAP5	0.584415	0	0	0	0	0.415585	0	0	0	0	0		A0A0A0MR25;A0A5S6RJB7;D2CGD1;E7EVR7;H7BXU9;H7C265;P21802;P21802-15;P21802-16;P21802-17;P21802-18;P21802-2;P21802-20;P21802-21;P21802-22;P21802-23;P21802-3;P21802-4;P21802-5;P21802-6;P21802-8;S4R381	FGFR2	0	0.269072	0.23659	0	0	0	0	0	0	0	0.494337		A0A0A0MRE5;Q9ULH1;Q9ULH1-2	ASAP1	NaN	NaN	NaN	NaN	NaN	NaN	NaN	NaN	NaN	NaN	NaN
A0A0A0MS87	NDRG2	0	0	0	0	0	0	1	0	0	0	0		A0A0A0MR36;Q9ULV0-2	MYO5B	0	0	0	0	0	0	0	0	0.410559	0	0.589441		A0A0A0MRF6;Q99996;Q99996-1;Q99996-3;Q99996-5;Q99996-6	AKAP9	1	0	0	0	0	0	0	0	0	0	0
A0A0A0MS99;I3L4X2;P33527;P33527-2;P33527-3;P33527-5;P33527-9	ABCC1	0	0.54881	0	0	0	0	0	0	0	0.223038	0.228153		A0A0A0MR51;H7C2V0;O60427	FADS1	0	0	0	0	0.523701	0	0	0	0	0	0.476299		A0A0A0MRF9;P16885	PLCG2	0	0	0	0	0	0	1	0	0	0	0
A0A0A0MSA9;A0A0C4DG49;P15151;P15151-2;P15151-3;P15151-4	PVR	0	0	0.2657	0	0	0	0	0	0.248839	0.208908	0.276554		A0A0A0MR67;A0A0A0MSA1;E9PDI6;F5GY28;F5H522;Q13936;Q13936-10;Q13936-11;Q13936-12;Q13936-13;Q13936-14;Q13936-15;Q13936-16;Q13936-17;Q13936-18;Q13936-19;Q13936-2;Q13936-20;Q13936-21;Q13936-22;Q13936-23;Q13936-24;Q13936-25;Q13936-26;Q13936-27;Q13936-28;Q13936-29;Q13936-3;Q13936-30;Q13936-31;Q13936-32;Q13936-33;Q13936-34;Q13936-35;Q13936-36;Q13936-37;Q13936-4;Q13936-5;Q13936-6;Q13936-7;Q13936-8;Q13936…	CACNA1C	0.578141	0	0	0	0	0	0	0	0.421859	0	0		A0A0A0MRG8;Q16611	BAK1	0	0	0	0.281224	0	0	0	0.718776	0	0	0
A0A0A0MSB4;Q6ZN50;Q969R2;Q969R2-2;Q969R2-3;Q969R2-6	OSBP2	0	0.426963	0	0	0	0	0	0	0.573037	0	0		A0A0A0MR74;O75907	DGAT1	0	0	0	0	0.446022	0	0	0.312553	0.241425	0	0		A0A0A0MRH3;Q9Y2W7;Q9Y2W7-2;Q9Y2W7-3	KCNIP3	0	1	0	0	0	0	0	0	0	0	0
A0A0A0MSB8;Q9UPT5;Q9UPT5-1;Q9UPT5-2;Q9UPT5-5;Q9UPT5-6	EXOC7	NaN	NaN	NaN	NaN	NaN	NaN	NaN	NaN	NaN	NaN	NaN		A0A0A0MR93;A0A0C4DH11;K7ELZ7;K7ES91;Q53F39;Q53F39-2;Q53F39-3	MPPE1	0	0	0	0	0	0	0	0	0.479496	0	0.520504		A0A0A0MRI1;Q8IXQ4	GPALPP1	0	0	0	0	0	0	1	0	0	0	0
A0A0A0MSE3;D3DNG8;P30556	AGTR1	0	0	0	0	0	0	0	0	0	0.506961	0.493039		A0A0A0MRA5;B7Z4B8;M0R3F1;Q9BUJ2;Q9BUJ2-2;Q9BUJ2-4	HNRNPUL1	0	1	0	0	0	0	0	0	0	0	0		A0A0A0MRI2;Q9UNH7	SNX6	0.389979	0	0	0	0	0	0.610021	0	0	0	0
A0A0A0MSG0;A6NGB9	WIPF3	0	0	1	0	0	0	0	0	0	0	0		A0A0A0MRA8;A8K968;Q9Y2J2;Q9Y2J2-2	EPB41L3	0	0	0	0.529343	0	0	0	0	0	0	0.470657		A0A0A0MRJ0;Q5VT25;Q5VT25-2;Q5VT25-3;Q5VT25-4;Q5VT25-5;Q5VT25-6	CDC42BPA	0	0	0	0	0	0	0	0	0	0	1
A0A0A0MSH9;A0A494C1F7;A0A494C1P7;Q86WJ1;Q86WJ1-2;Q86WJ1-4	CHD1L	0	0.645273	0.354727	0	0	0	0	0	0	0	0		A0A0A0MRB5;Q8WXG6;Q8WXG6-2;Q8WXG6-3;Q8WXG6-4;Q8WXG6-5;Q8WXG6-6;Q8WXG6-7;Q8WXG6-8	MADD	0	0	0	0	0	0	0.752484	0	0.247516	0	0		A0A0A0MRJ6	PCMT1	0	0	0	0	0	0	1	0	0	0	0
A0A0A0MSI2;B3KPJ4;Q8IXK0;Q8IXK0-2;Q8IXK0-3;Q8IXK0-4;Q8IXK0-5	PHC2	0	0	0	0	0	0	1	0	0	0	0		A0A0A0MRD0;A0A2R8YCE3;F5H4B4;F5H4B4-2	FAM227A	NaN	NaN	NaN	NaN	NaN	NaN	NaN	NaN	NaN	NaN	NaN		A0A0A0MRJ7;P12259	F5	0	0	0	0	1	0	0	0	0	0	0
A0A0A0MSI6;B7Z1P2;Q9H4M3;Q9H4M3-2	FBXO44	0.339945	0.200752	0.459304	0	0	0	0	0	0	0	0		A0A0A0MRE5;Q9ULH1;Q9ULH1-2	ASAP1	0	1	0	0	0	0	0	0	0	0	0		A0A0A0MRM2;Q86VF7;Q86VF7-2;Q86VF7-3;Q86VF7-4	NRAP	0.609966	0	0	0	0	0	0	0	0.390034	0	0
A0A0A0MSI8;O00471	EXOC5	NaN	NaN	NaN	NaN	NaN	NaN	NaN	NaN	NaN	NaN	NaN		A0A0A0MRF6;Q99996;Q99996-1;Q99996-3;Q99996-5;Q99996-6	AKAP9	0	0	0	0	0	0	1	0	0	0	0		A0A0A0MRM9;Q14978;Q14978-2;Q14978-3	NOLC1	0	1	0	0	0	0	0	0	0	0	0
A0A0A0MSJ9;Q15283;Q15283-2	RASA2	0	0	0.517785	0	0	0	0	0	0	0.482215	0		A0A0A0MRF9;P16885	PLCG2	0.425089	0	0	0	0	0	0.574911	0	0	0	0		A0A0A0MRP6;B7ZLQ5;P28370;P28370-2	SMARCA1	0	0.76031	0	0	0	0	0	0	0	0	0.23969
A0A0A0MSK3;A0A0C4DH47;A0A498U6I9;C9JS68;P24557;P24557-2;P24557-3;P24557-4;Q53F23	TBXAS1	0	1	0	0	0	0	0	0	0	0	0		A0A0A0MRG8;Q16611	BAK1	0	0	0	0	0	0	0	1	0	0	0		A0A0A0MRR1;Q5VV50;Q5VV51;Q5VV52;Q5VV52-3	ZNF691	0	1	0	0	0	0	0	0	0	0	0
A0A0A0MSK6;Q13017;Q13017-2	ARHGAP5	NaN	NaN	NaN	NaN	NaN	NaN	NaN	NaN	NaN	NaN	NaN		A0A0A0MRG9;B1AMJ5;Q5JTU8;Q96SN8;Q96SN8-2;Q96SN8-3;Q96SN8-4	CDK5RAP2	0	0	0	0	0	0	0	0	0	0	1		A0A0A0MRR7;P09234	SNRPC	0	1	0	0	0	0	0	0	0	0	0
A0A0A0MSL1;Q8TDM6;Q8TDM6-2;Q8TDM6-3;Q8TDM6-4	DLG5	0	0.344938	0	0	0	0	0	0.269627	0	0	0.385435		A0A0A0MRH3;Q9Y2W7;Q9Y2W7-2;Q9Y2W7-3	KCNIP3	0	0.320742	0	0	0	0	0	0	0.302799	0.37646	0		A0A0A0MRS8;Q9P2E2;Q9P2E2-3	KIF17	0.387744	0	0	0	0	0.368657	0	0	0.243599	0	0
A0A0A0MSM0	HSPH1	0	0	0	0	0	0	0	0	1	0	0		A0A0A0MRI1;Q8IXQ4	GPALPP1	NaN	NaN	NaN	NaN	NaN	NaN	NaN	NaN	NaN	NaN	NaN		A0A0A0MRT2;Q9BTA9;Q9BTA9-2;Q9BTA9-5	WAC	0	0	0	1	0	0	0	0	0	0	0
A0A0A0MSP4;Q86WC4	OSTM1	0	0	0.598762	0	0	0	0	0	0	0.401238	0		A0A0A0MRI2;Q9UNH7	SNX6	0	0	0	0	0	0	1	0	0	0	0		A0A0A0MRT6;Q8IZP0;Q8IZP0-2;Q8IZP0-3;Q8IZP0-4;Q8IZP0-5;Q8IZP0-6;Q8IZP0-9	ABI1	NaN	NaN	NaN	NaN	NaN	NaN	NaN	NaN	NaN	NaN	NaN
A0A0A0MSQ0;P13797;P13797-2	PLS3	NaN	NaN	NaN	NaN	NaN	NaN	NaN	NaN	NaN	NaN	NaN		A0A0A0MRJ0;Q5VT25;Q5VT25-2;Q5VT25-3;Q5VT25-4;Q5VT25-5;Q5VT25-6	CDC42BPA	0	0	0.354821	0.357404	0	0	0	0	0	0	0.287775		A0A0A0MRW6;Q9H6R4;Q9H6R4-2;Q9H6R4-4	NOL6	0	1	0	0	0	0	0	0	0	0	0
A0A0A0MSS0;P60880	SNAP25	0	0	0	0	0.507601	0	0	0	0	0.231387	0.261012		A0A0A0MRJ6	PCMT1	0	0	0	0	0	0	1	0	0	0	0		A0A0A0MRX1;A0A0R4J2E6;A0A494C0F8;A0A494C147;A0A494C1D9;B1APY9;P26378;P26378-1;P26378-2;P26378-3;P26378-4;P26378-5;Q12926;Q12926-2	ELAVL2;ELAVL4;ELAVL4;ELAVL4;ELAVL4;ELAVL4;ELAVL4;ELAVL4;ELAVL4;ELAVL4;ELAVL4;ELAVL4;ELAVL2;ELAVL2	0	0.258368	0.395949	0	0	0	0	0	0.345684	0	0
A0A0A0MSS8;P42330	AKR1C3	0	0	0	0	0	0	1	0	0	0	0		A0A0A0MRJ7;P12259	F5	0	0	0	0	0.586972	0	0	0	0	0.413028	0		A0A0A0MRX8;A0A1B0GWI9;A0A1B0GWJ4;A0A2R8Y7V8;O00712;O00712-4;O00712-5;Q5VW26;Q5VW27;Q5VW30;U3KQE8	NFIB	0	1	0	0	0	0	0	0	0	0	0
A0A0A0MST8;C9JRP1;E9PFN4;Q9Y6M7;Q9Y6M7-12;Q9Y6M7-13;Q9Y6M7-2;Q9Y6M7-6;Q9Y6M7-7;Q9Y6M7-8;Q9Y6M7-9	SLC4A7	0	0	0	0	0	0	0	0	0	0.48737	0.51263		A0A0A0MRJ8;Q7Z6I6;Q7Z6I6-3	ARHGAP30	0	0	0.476539	0	0	0.227086	0	0	0	0	0.296375		A0A0A0MRY0;B0QYI1;Q8WUA7;Q8WUA7-2;Q8WUA7-3;Q8WUA7-4	TBC1D22A	0	0	0	0	0	0	1	0	0	0	0
A0A0A0MSU4;O94911-3	ABCA8	0	0	0.582652	0	0	0	0	0	0	0	0.417348		A0A0A0MRM2;Q86VF7;Q86VF7-2;Q86VF7-3;Q86VF7-4	NRAP	0	0	0.580257	0	0	0.419743	0	0	0	0	0		A0A0A0MRZ1;Q9H9P5-1;Q9H9P5-3	UNKL	1	0	0	0	0	0	0	0	0	0	0
A0A0A0MSV9;A0A0G2JH37;A0A0G2JKZ1;A2AB90;O15533;O15533-2;O15533-3	TAPBP	0	0	0	0	1	0	0	0	0	0	0		A0A0A0MRM9;Q14978;Q14978-2;Q14978-3	NOLC1	0	1	0	0	0	0	0	0	0	0	0		A0A0A0MRZ4;E7EMV7;Q15025;Q15025-2;Q15025-3;Q15025-4;Q15025-5;Q15025-6;Q15025-7;Q15025-8	TNIP1	1	0	0	0	0	0	0	0	0	0	0
A0A0A0MSW2;E9PEI2;Q9BQW3;Q9BQW3-1	EBF4	0	0	0	0	0	0	0	0.431607	0	0	0.568393		A0A0A0MRP6;B7ZLQ5;P28370;P28370-2	SMARCA1	0	1	0	0	0	0	0	0	0	0	0		A0A0A0MS59;A0A0C4DFX4;Q6ZRS2;Q6ZRS2-2;Q6ZRS2-3	SRCAP;ENSG00000282034;SRCAP;SRCAP;SRCAP	0	1	0	0	0	0	0	0	0	0	0
A0A0A0MSX9;P41252	IARS1	1	0	0	0	0	0	0	0	0	0	0		A0A0A0MRR7;P09234	SNRPC	0	1	0	0	0	0	0	0	0	0	0		A0A0A0MS79;O14513	NCKAP5	0	1	0	0	0	0	0	0	0	0	0
A0A0A0MSY7;O00142;O00142-4;O00142-6	TK2	0	0	0	0	0	0	0	1	0	0	0		A0A0A0MRT2;Q9BTA9;Q9BTA9-2;Q9BTA9-5	WAC	0.624868	0.375132	0	0	0	0	0	0	0	0	0		A0A0A0MS87	NDRG2	0	0	0	0	0	0	1	0	0	0	0
A0A0A0MSZ9;Q05048	CSTF1	0	1	0	0	0	0	0	0	0	0	0		A0A0A0MRT6;Q8IZP0;Q8IZP0-2;Q8IZP0-3;Q8IZP0-4;Q8IZP0-5;Q8IZP0-6;Q8IZP0-9	ABI1	NaN	NaN	NaN	NaN	NaN	NaN	NaN	NaN	NaN	NaN	NaN		A0A0A0MS98;P02730;P02730-2	SLC4A1	0	0	0	0	0.406382	0	0	0	0	0	0.593618
A0A0A0MT02;A2ABK4;P18615;P18615-3	NELFE	0	0	0	0	0	1	0	0	0	0	0		A0A0A0MRW6;Q9H6R4;Q9H6R4-2;Q9H6R4-4	NOL6	0	1	0	0	0	0	0	0	0	0	0		A0A0A0MS99;I3L4X2;P33527;P33527-2;P33527-3;P33527-5;P33527-9	ABCC1	0	0	0	0	0.531137	0	0	0	0	0	0.468863
A0A0A0MT16;Q86UQ4;Q86UQ4-3;Q86UQ4-4	ABCA13	0	0	0	0	0	0	0	0	0	0.573265	0.426735		A0A0A0MRX1;A0A0R4J2E6;A0A494C0F8;A0A494C147;A0A494C1D9;B1APY9;P26378;P26378-1;P26378-2;P26378-3;P26378-4;P26378-5;Q12926;Q12926-2	ELAVL2;ELAVL4;ELAVL4;ELAVL4;ELAVL4;ELAVL4;ELAVL4;ELAVL4;ELAVL4;ELAVL4;ELAVL4;ELAVL4;ELAVL2;ELAVL2	0	0	1	0	0	0	0	0	0	0	0		A0A0A0MSA9;A0A0C4DG49;P15151;P15151-2;P15151-3;P15151-4	PVR	0	0	0	0	0	0	0	0	0	0.433301	0.566699
A0A0A0MT32;P38571;P38571-2	LIPA	NaN	NaN	NaN	NaN	NaN	NaN	NaN	NaN	NaN	NaN	NaN		A0A0A0MRX8;A0A1B0GWI9;A0A1B0GWJ4;A0A2R8Y7V8;O00712;O00712-4;O00712-5;Q5VW26;Q5VW27;Q5VW30;U3KQE8	NFIB	0	1	0	0	0	0	0	0	0	0	0		A0A0A0MSB4;Q6ZN50;Q969R2;Q969R2-2;Q969R2-3;Q969R2-6	OSBP2	0	0	0	0	0	0	0	0	0	0	1
A0A0A0MT35;A0A2P0CTB1;Q8TBF2;Q8TBF2-3	PRXL2B	0	0	0	1	0	0	0	0	0	0	0		A0A0A0MRY0;B0QYI1;Q8WUA7;Q8WUA7-2;Q8WUA7-3;Q8WUA7-4	TBC1D22A	0.44309	0	0	0	0	0	0.55691	0	0	0	0		A0A0A0MSB8;Q9UPT5;Q9UPT5-1;Q9UPT5-2;Q9UPT5-5;Q9UPT5-6	EXOC7	0	0	0	1	0	0	0	0	0	0	0
A0A0A0MT61;G5E979;H7BYM2;Q8WYN0;Q8WYN0-3;Q8WYN0-5	ATG4A	0	0	0	1	0	0	0	0	0	0	0		A0A0A0MRZ1;Q9H9P5-1;Q9H9P5-3	UNKL	0	0	1	0	0	0	0	0	0	0	0		A0A0A0MSD0;Q4LDE5;Q4LDE5-3	SVEP1	0	0	0	0	0	0	0	0	1	0	0
A0A0A0MT72;C9JUH3;Q9BSQ5;Q9BSQ5-2;Q9BSQ5-3	CCM2	0.720385	0	0	0	0	0.279615	0	0	0	0	0		A0A0A0MRZ4;E7EMV7;Q15025;Q15025-2;Q15025-3;Q15025-4;Q15025-5;Q15025-6;Q15025-7;Q15025-8	TNIP1	0	0	0	0	0	0	0	0	1	0	0		A0A0A0MSE3;D3DNG8;P30556	AGTR1	0	0	0	0	0.48033	0	0	0	0	0	0.51967
A0A0A0MT83;P26440	IVD	0	0	0	0	0	0	0	1	0	0	0		A0A0A0MS14	IGHV1-45	0.29514	0	0	0	0	0	0.70486	0	0	0	0		A0A0A0MSG0;A6NGB9	WIPF3	0	0	0	0	0	0	0.721067	0	0.278933	0	0
A0A0A0MT93	IGLJ6	0	0	0	0	0	0	0	0	0.575199	0	0.424801		A0A0A0MS59;A0A0C4DFX4;Q6ZRS2;Q6ZRS2-2;Q6ZRS2-3	SRCAP;ENSG00000282034;SRCAP;SRCAP;SRCAP	0	1	0	0	0	0	0	0	0	0	0		A0A0A0MSH9;A0A494C1F7;A0A494C1P7;Q86WJ1;Q86WJ1-2;Q86WJ1-4	CHD1L	0	0.475232	0	0	0	0.524768	0	0	0	0	0
A0A0A0MTC2;D6RA37;D6RDV0;D6RIY7;Q13454;Q13454-2	TUSC3	0	0	0	0	0.618019	0	0	0.381981	0	0	0		A0A0A0MS79;O14513	NCKAP5	0	0.669968	0.330032	0	0	0	0	0	0	0	0		A0A0A0MSI2;B3KPJ4;Q8IXK0;Q8IXK0-2;Q8IXK0-3;Q8IXK0-4;Q8IXK0-5	PHC2	0.378686	0	0	0	0	0	0.621314	0	0	0	0
A0A0A0MTG5;P13232;P13232-2;Q5FBX5	IL7	0	0	0.460761	0	0	0	0	0	0.539239	0	0		A0A0A0MS87	NDRG2	0	0	0	0	0	0	1	0	0	0	0		A0A0A0MSI6;B7Z1P2;Q9H4M3;Q9H4M3-2	FBXO44	0	0	0	0	0	0.263272	0	0	0.736728	0	0
A0A0A0MTH3	ILK	NaN	NaN	NaN	NaN	NaN	NaN	NaN	NaN	NaN	NaN	NaN		A0A0A0MS99;I3L4X2;P33527;P33527-2;P33527-3;P33527-5;P33527-9	ABCC1	0	0.344296	0	0	0	0	0	0	0	0	0.655704		A0A0A0MSI8;O00471	EXOC5	NaN	NaN	NaN	NaN	NaN	NaN	NaN	NaN	NaN	NaN	NaN
A0A0A0MTH9;O14981	BTAF1	0.511368	0.488632	0	0	0	0	0	0	0	0	0		A0A0A0MSA9;A0A0C4DG49;P15151;P15151-2;P15151-3;P15151-4	PVR	0	0	0	0	0	0	0	0	0	0	1		A0A0A0MSJ9;Q15283;Q15283-2	RASA2	0	0	0	0	0	0	0	0	0.472915	0	0.527085
A0A0A0MTJ9;Q6PIU2;Q6PIU2-2	NCEH1	0	0	0	0	0.704486	0	0	0.295514	0	0	0		A0A0A0MSB4;Q6ZN50;Q969R2;Q969R2-2;Q969R2-3;Q969R2-6	OSBP2	0	0	1	0	0	0	0	0	0	0	0		A0A0A0MSK3;A0A0C4DH47;A0A498U6I9;C9JS68;P24557;P24557-2;P24557-3;P24557-4;Q53F23	TBXAS1	0	0	0	0	0	0	0	0	0	0	1
A0A0A0MTK0;A0A0A0MTP0;F5GWB1;Q7Z6B0;Q7Z6B0-2	CCDC91	0.371492	0	0	0	0	0	0.628508	0	0	0	0		A0A0A0MSB8;Q9UPT5;Q9UPT5-1;Q9UPT5-2;Q9UPT5-5;Q9UPT5-6	EXOC7	NaN	NaN	NaN	NaN	NaN	NaN	NaN	NaN	NaN	NaN	NaN		A0A0A0MSK6;Q13017;Q13017-2	ARHGAP5	NaN	NaN	NaN	NaN	NaN	NaN	NaN	NaN	NaN	NaN	NaN
A0A0A0MTL6;Q6ZS17;Q6ZS17-2;Q6ZS17-3;Q6ZS17-4	RIPOR1	0	0	0.244136	0	0	0	0.755864	0	0	0	0		A0A0A0MSD0;Q4LDE5;Q4LDE5-3	SVEP1	0	0	0	0	0.545339	0	0	0	0.454661	0	0		A0A0A0MSL1;Q8TDM6;Q8TDM6-2;Q8TDM6-3;Q8TDM6-4	DLG5	0	0	0	0	0.695343	0	0	0	0	0	0.304657
A0A0A0MTL7;A0A0D9SGH8;C6ZRJ6;C6ZRJ7;C6ZRK5;E2GH26;Q5JRY3;Q5JRY4;Q5JRY5;Q5VVR7;Q9NQB0;Q9NQB0-10;Q9NQB0-11;Q9NQB0-12;Q9NQB0-13;Q9NQB0-14;Q9NQB0-15;Q9NQB0-16;Q9NQB0-17;Q9NQB0-2;Q9NQB0-3;Q9NQB0-4;Q9NQB0-5;Q9NQB0-6;Q9NQB0-7;Q9NQB0-8;Q9NQB0-9	TCF7L2	0	0.580899	0	0	0	0	0	0	0	0	0.419101		A0A0A0MSE3;D3DNG8;P30556	AGTR1	0	0	0	0	0.55656	0	0	0	0	0	0.44344		A0A0A0MSM0	HSPH1	0	0.250286	0	0	0	0.380052	0	0	0.369662	0	0
A0A0A0MTN0;Q13617;Q13617-2	CUL2	0.319842	0	0	0	0	0	0.680158	0	0	0	0		A0A0A0MSG0;A6NGB9	WIPF3	0	0	0	0	0	0	1	0	0	0	0		A0A0A0MSP4;Q86WC4	OSTM1	0	0	0	0	0	0	0	0	0	0.591623	0.408377
A0A0A0MTN3	GSTM3	0	0	1	0	0	0	0	0	0	0	0		A0A0A0MSH9;A0A494C1F7;A0A494C1P7;Q86WJ1;Q86WJ1-2;Q86WJ1-4	CHD1L	0	0.660925	0	0	0	0	0	0	0.339075	0	0		A0A0A0MSQ0;P13797;P13797-2	PLS3	0	0	0	0	0	0	1	0	0	0	0
A0A0A0MTP7;F8VXG7;Q99590;Q99590-2	SCAF11	0.586566	0.413434	0	0	0	0	0	0	0	0	0		A0A0A0MSI2;B3KPJ4;Q8IXK0;Q8IXK0-2;Q8IXK0-3;Q8IXK0-4;Q8IXK0-5	PHC2	0	0	0	0	0	0	1	0	0	0	0		A0A0A0MSS0;P60880	SNAP25	0	0	0	0	0	0	0	0	0	0	1
A0A0A0MTQ3;Q96N23;Q96N23-2	CFAP54	0	0	0.440307	0	0	0	0	0	0.559693	0	0		A0A0A0MSI6;B7Z1P2;Q9H4M3;Q9H4M3-2	FBXO44	0.38965	0	0	0	0	0.200001	0	0	0.41035	0	0		A0A0A0MSS7	BEND7	0	0.22166	0	0	0	0	0	0.535213	0	0	0.243127
A0A0A0MTQ8;P0C221	CCDC175	0	0.418299	0	0	0	0	0	0	0	0.32522	0.256481		A0A0A0MSI8;O00471	EXOC5	0	0	0	1	0	0	0	0	0	0	0		A0A0A0MSS8;P42330	AKR1C3	0	0	0	0	0	0	1	0	0	0	0
A0A0A0MTR7;Q63HN8	RNF213	0.616522	0	0	0	0	0.383478	0	0	0	0	0		A0A0A0MSJ9;Q15283;Q15283-2	RASA2	0	0	0	0	0	0	0	0	0	1	0		A0A0A0MST8;C9JRP1;E9PFN4;Q9Y6M7;Q9Y6M7-12;Q9Y6M7-13;Q9Y6M7-2;Q9Y6M7-6;Q9Y6M7-7;Q9Y6M7-8;Q9Y6M7-9	SLC4A7	0	0	0	0	0	0	0	0	1	0	0
[truncated: 8,053 more rows]

## Sheet: E06_D_left
reliable Relocalizations for chow vs. HFHF fed
Protein	PG.Genes	DS	P(t)_RLS	-log10_P(t)_RLS
[truncated: 1,493 more rows]

## Sheet: E06_D_right
reliable Relocalizations chow vs. HFHF fasted
[truncated: 1,537 more rows]

[truncated: 1 more sheets: E06_E]
