# Supplementary material for: C-COMPASS: a user-friendly neural network tool profiles cell compartments at protein and lipid levels
Source: Nat Methods. 2025 Dec 4;23(1):118–30. doi: 10.1038/s41592-025-02880-3 (PMC12791020; doi:10.1038/s41592-025-02880-3)
Supplement: Supplementary file 28 — Humanized liver spatial proteomic examples. [file 41592_2025_2880_MOESM28_ESM.xlsx]

## Sheet: E07_A
SIN3A HFHF fed				SIN3A HFHF fasted				SAP30BP HFHF fed				SAP30BP HFHF fasted				SAP30L HFHF fed				SAP30L HFHF fasted				HDAC1 HFHF fed				HDAC1 HFHF fasted
Fraction	SIN3A	Nucleus_median		Fraction	SIN3A	Nucleus_median		Fraction	SAP30BP	Nucleus_median		Fraction	SAP30BP	Nucleus_median		Fraction	SAP30L	Nucleus_median		Fraction	SAP30L	Nucleus_median		Fraction	HDAC1	Nucleus_median		Fraction	HDAC1	Nucleus_median
1	0.26172	0.021351		1	0.211629	0.0421082		1	0.613818	0.021351		1	0.230216	0.0421082		1	0	0.021351		1	0	0.0421082		1	0.0351732	0.021351		1	0.0188961	0.0421082
2	0.433435	0		2	0.0603334	0		2	1	0		2	0.263664	0		2	0	0		2	0	0		2	0	0		2	0.0946659	0
3	0	0.0227194		3	0.270657	0.0228793		3	0.357947	0.0227194		3	0.208785	0.0228793		3	0	0.0227194		3	0	0.0228793		3	0.20871	0.0227194		3	0.144397	0.0228793
4	0.109834	0.0541777		4	0.15925	0.0470817		4	0.211944	0.0541777		4	0.342126	0.0470817		4	0	0.0541777		4	0	0.0470817		4	0.114899	0.0541777		4	0.131653	0.0470817
5	0.0383082	0.0655941		5	0.141138	0.0537542		5	0.196063	0.0655941		5	0.215476	0.0537542		5	0	0.0655941		5	0	0.0537542		5	0.113588	0.0655941		5	0.0410493	0.0537542
6	0.201203	0.0919329		6	0.0106778	0.061574		6	0.197577	0.0919329		6	0.583529	0.061574		6	0	0.0919329		6	0	0.061574		6	0.0134468	0.0919329		6	0	0.061574
7	0.0792591	0.0937902		7	0	0.0820516		7	0.521299	0.0937902		7	0.182675	0.0820516		7	0	0.0937903		7	0	0.0820516		7	0.0565563	0.0937903		7	0.122948	0.0820516
8	0.00794512	0.104174		8	0.00610604	0.0792052		8	0.126569	0.104174		8	0.09436	0.0792052		8	0	0.104174		8	0	0.0792052		8	0.0311672	0.104174		8	0.0243411	0.0792052
9	0.0493709	0.128511		9	0.00938339	0.0970295		9	0.0751569	0.128511		9	0.0296947	0.0970295		9	0	0.128511		9	0	0.0970295		9	0.0331073	0.128511		9	0.0267146	0.0970295
10	0.166299	0.130183		10	0.042311	0.129014		10	0.0994448	0.130183		10	0	0.129014		10	0	0.130183		10	0	0.129014		10	0.0381198	0.130183		10	0.13156	0.129014
11	0.148286	0.161673		11	0.0950903	0.150645		11	0	0.161673		11	0.157765	0.150645		11	0	0.161673		11	0	0.150645		11	0.00475477	0.161673		11	0.292799	0.150645
12	0.29604	0.238312		12	0.232823	0.217004		12	0.164192	0.238312		12	0.258935	0.217004		12	0	0.238312		12	0	0.217004		12	0.0204259	0.238312		12	0.242514	0.217004
13	0.272605	0.234172		13	0.438952	0.223169		13	0.208355	0.234172		13	0.253762	0.223169		13	0	0.234172		13	0	0.223169		13	0.217178	0.234172		13	0.254905	0.223169
14	1	1		14	1	1		14	0.631935	1		14	1	1		14	1	1		14	1	1		14	1	1		14	1	1

## Sheet: E07_B
COG5 chow						COG5 HFHF fed						COG5 HFHF fasted						COG6 chow						COG6 HFHF fed						COG6 HFHF fasted						COG7 chow						COG7 HFHF fed						COG7 HFHF fasted
Fraction	COG5	Cytosol	Endosome	Protein-Complex		Fraction	COG5	Cytosol	Endosome	Protein-Complex		Fraction	COG5	Cytosol	Endosome	Protein-Complex		Fraction	COG6	Cytosol	Endosome	Protein-Complex		Fraction	COG6	Cytosol	Endosome	Protein-Complex		Fraction	COG6	Cytosol	Endosome	Protein-Complex		Fraction	COG7	Cytosol	Endosome	Protein-Complex		Fraction	COG7	Cytosol	Endosome	Protein-Complex		Fraction	COG7
1	0.794128	0.686296	0.194442	0.378829		4	1	0.676473	0.198223	0.381362		1	0.810425	0.597109	0.267986	0.386285		1	0.708035	0.686296	0.194442	0.378829		1	0.215479	0.676473	0.198223	0.381362		1	0.315362	0.597109	0.267986	0.386285		1	0.288425	0.686296	0.194442	0.378829		1	0.64041	0.676473	0.198223	0.381362		1	0.731035
2	0.928665	1	0	0.529308		5	0.878371	1	0.0349905	0.533821		2	0.933464	1	0	0.565036		2	0.831322	1	0	0.529308		2	0.789434	1	0.0349905	0.533821		2	1	1	0	0.565036		2	0.733105	1	0	0.529308		2	0.986746	1	0.0349905	0.533821		2	1
3	1	0.620714	0.232154	0.902176		6	0.99236	0.505941	0.294662	0.920294		3	1	0.625892	0.176341	0.941656		3	0.788198	0.620714	0.232154	0.902176		3	1	0.505941	0.294662	0.920294		3	0.863143	0.625892	0.176341	0.941656		3	1	0.620714	0.232154	0.902176		3	0.950643	0.505941	0.294662	0.920294		3	0.800156
4	0.690113	0.528683	0.297181	0.715888		7	0.703674	0.419814	0.395024	0.755536		4	0.753729	0.483629	0.347008	0.655874		4	1	0.528683	0.297181	0.715888		4	0.8662	0.419814	0.395024	0.755536		4	0.866183	0.483629	0.347008	0.655874		4	0.747265	0.528683	0.297181	0.715888		4	1	0.419814	0.395024	0.755536		4	0.767343
5	0.534666	0.321283	0.468307	0.41364		8	0.615275	0.370478	0.436716	0.595772		5	0.683995	0.415103	0.495113	0.53614		5	0.829637	0.321283	0.468307	0.41364		5	0.599081	0.370478	0.436716	0.595772		5	0.688878	0.415103	0.495113	0.53614		5	0.483758	0.321283	0.468307	0.41364		5	0.783825	0.370478	0.436716	0.595772		5	0.600246
6	0.569037	0.237485	0.611751	0.336119		9	0.641636	0.224559	0.690036	0.398707		6	0.499484	0.286743	0.593549	0.380771		6	0.95954	0.237485	0.611751	0.336119		6	0.830372	0.224559	0.690036	0.398707		6	0.554478	0.286743	0.593549	0.380771		6	0.627912	0.237485	0.611751	0.336119		6	0.852501	0.224559	0.690036	0.398707		6	0.468577
7	0.395271	0.201337	0.532874	0.256893		10	0.490502	0.192132	0.630108	0.29908		7	0.402622	0.191495	0.634358	0.284708		7	0.823243	0.201337	0.532874	0.256893		7	0.947755	0.192132	0.630108	0.29908		7	0.694788	0.191495	0.634358	0.284708		7	0.265024	0.201337	0.532874	0.256893		7	0.645133	0.192132	0.630108	0.29908		7	0.327074
8	0.312971	0.144154	0.481232	0.203268		11	0.214794	0.124695	0.494577	0.21994		8	0.189638	0.154255	0.523548	0.227421		8	0.727451	0.144154	0.481232	0.203268		8	0.335691	0.124695	0.494577	0.21994		8	0.316889	0.154255	0.523548	0.227421		8	0.16953	0.144154	0.481232	0.203268		8	0.401615	0.124695	0.494577	0.21994		8	0.358972
9	0.221577	0.126683	0.495068	0.19487		12	0.0636106	0.0790404	0.328699	0.135413		9	0.130186	0.112157	0.390666	0.16119		9	0.804778	0.126683	0.495068	0.19487		9	0.250402	0.0790404	0.328699	0.135413		9	0.175047	0.112157	0.390666	0.16119		9	0.107394	0.126683	0.495068	0.19487		9	0.284839	0.0790404	0.328699	0.135413		9	0.285096
10	0.253441	0.0923055	0.344348	0.117162		13	0.134646	0.0596938	0.29761	0.0971482		10	0.197847	0.0983802	0.391674	0.164343		10	0.965389	0.0923055	0.344348	0.117162		10	0.729427	0.0596938	0.29761	0.0971482		10	0.383496	0.0983802	0.391674	0.164343		10	0.210555	0.0923055	0.344348	0.117162		10	0.217768	0.0596938	0.29761	0.0971482		10	0.285978
11	0	0.0212346	0.155396	0.0249862		14	0	0.0251326	0.126748	0.0415079		11	0.249643	0.0517344	0.193696	0.0673887		11	0.0407324	0.0212346	0.155396	0.0249862		11	0	0.0251326	0.126748	0.0415079		11	0.15317	0.0517344	0.193696	0.0673887		11	0.000129495	0.0212346	0.155396	0.0249862		11	0.215256	0.0251326	0.126748	0.0415079		11	0.171354
12	0	0	0.0935793	0		15	0	0	0.0820746	0		12	0	0.0174191	0.126392	0.0347604		12	0	0	0.0935793	0		12	0.00573195	0	0.0820746	0		12	0	0.0174191	0.126392	0.0347604		12	0	0	0.0935793	0		12	0	0	0.0820746	0		12	0.192677
13	0	0.0238451	0.108803	0.0461553		16	0.150902	0.0148661	0.0878524	0.035702		13	0	0.024111	0.125464	0.0458197		13	0.480692	0.0238451	0.108803	0.0461553		13	0.892461	0.0148661	0.0878524	0.035702		13	0.105491	0.024111	0.125464	0.0458197		13	0.0988153	0.0238451	0.108803	0.0461553		13	0.111212	0.0148661	0.0878524	0.035702		13	0.155456
14	0	0.00828709	0.283863	0.0376094		17	0	0.0326891	0.154851	0.0664279		14	0	0	0.152916	0		14	0.159409	0.00828709	0.283863	0.0376094		14	0.0467789	0.0326891	0.154851	0.0664279		14	0	0	0.152916	0		14	0	0.00828709	0.283863	0.0376094		14	0.145097	0.0326891	0.154851	0.0664279		14	0
[truncated: 18 more columns]
