# Supplementary material for: C-COMPASS: a user-friendly neural network tool profiles cell compartments at protein and lipid levels
Source: Nat Methods. 2025 Dec 4;23(1):118–30. doi: 10.1038/s41592-025-02880-3 (PMC12791020; doi:10.1038/s41592-025-02880-3)
Supplement: Supplementary file 29 — Liver spatial lipidomic results. [file 41592_2025_2880_MOESM29_ESM.xlsx]

## Sheet: E08_A
feature	class	PC1	PC2
CE 14:0;0	CE	-0.0247238	-0.0161802
CE 16:0;0	CE	-0.075465	-0.00971688
CE 16:1;0	CE	-0.0760938	-0.0091925
CE 17:1;0	CE	-0.0252897	0.0223449
CE 18:0;0	CE	-0.014499	-0.00366249
CE 18:1;0	CE	-0.0770432	-0.00455578
CE 18:2;0	CE	-0.0742908	0.0158064
CE 20:4;0	CE	-0.0393895	0.0416177
CE 22:6;0	CE	-0.00731053	-0.00475966
CL 68:2;0	CL	-4.11393e-18	-2.6439e-17
CL 68:4;0	CL	3.56614e-17	-2.40874e-17
CL 68:5;0	CL	-0.0015402	0.0115152
CL 68:6;0	CL	-0.000329736	-0.00397809
CL 70:4;0	CL	0.0145685	0.0263632
CL 70:5;0	CL	0.00585424	0.02352
CL 70:6;0	CL	0.015706	0.0229655
CL 70:7;0	CL	0.0214377	0.0185174
CL 72:6;0	CL	0.0238083	0.0392773
CL 72:7;0	CL	0.0184274	0.0265558
CL 72:8;0	CL	0.0347418	0.0334083
CL 74:10;0	CL	6.5759e-18	4.8884e-18
CL 74:7;0	CL	7.69489e-19	1.4099e-18
CL 74:8;0	CL	0.011407	0.024415
CL 74:9;0	CL	0.0219818	0.0255836
CL 76:10;0	CL	9.06288e-18	2.84029e-18
Cer 34:1;2	Cer	0.0198903	0.0419616
Cer 36:0;3	Cer	8.26994e-18	1.82283e-18
Cer 36:1;2	Cer	-0.0017403	-0.00172964
Cer 38:1;2	Cer	-0.00120794	0.0218976
Cer 39:1;2	Cer	-0.000740662	0.00901914
Cer 40:1;2	Cer	0.0390577	0.0818456
Cer 40:2;2	Cer	0.0419403	0.0754828
Cer 41:1;2	Cer	0.0298134	0.0303282
Cer 41:2;2	Cer	0.0122105	0.00609134
Cer 42:1;2	Cer	0.0371049	0.0540571
Cer 42:2;2	Cer	0.0381728	0.0717456
Cer 42:3;2	Cer	0.0113221	0.0317155
Chol	Chol	0.00376429	0.100444
DAG 12:0;0_18:1;0	DAG	-0.0972002	0.0352775
DAG 14:0;0_16:0;0	DAG	-0.0849358	0.0482578
DAG 14:0;0_16:1;0	DAG	-0.0934526	0.0428149
DAG 14:0;0_18:0;0	DAG	-0.00564385	-0.00359725
DAG 14:0;0_18:1;0	DAG	-0.0947482	0.0487369
DAG 14:0;0_18:2;0	DAG	-0.095496	0.0305249
DAG 14:1;0_16:0;0	DAG	-0.0926137	0.018366
DAG 16:0;0_16:0;0	DAG	-0.0849327	0.0467922
DAG 16:0;0_16:1;0	DAG	-0.0935581	0.0500654
DAG 16:0;0_18:0;0	DAG	-0.00133277	0.0181357
DAG 16:0;0_18:1;0	DAG	-0.0921507	0.0546306
DAG 16:0;0_18:2;0	DAG	-0.0840286	0.0700259
DAG 16:0;0_20:1;0	DAG	-0.0553747	-0.030686
DAG 16:0;0_20:2;0	DAG	0	0
DAG 16:0;0_20:3;0	DAG	-0.0136734	0.089499
DAG 16:0;0_20:4;0	DAG	0.0404001	0.0725943
DAG 16:0;0_22:5;0	DAG	-0.0252401	-0.0161479
DAG 16:0;0_22:6;0	DAG	-0.0253878	0.111804
DAG 16:1;0_16:1;0	DAG	-0.0975601	0.0304362
DAG 16:1;0_18:0;0	DAG	-0.00478676	0.0444711
DAG 16:1;0_18:1;0	DAG	-0.0974594	0.0358289
DAG 16:1;0_18:2;0	DAG	-0.0960019	0.037453
DAG 16:1;0_20:1;0	DAG	-0.0433031	-0.0306792
DAG 17:2;0_18:1;0	DAG	0	0
DAG 18:0;0_18:1;0	DAG	-0.0301228	0.0330379
DAG 18:0;0_18:2;0	DAG	-0.00336518	0.103798
DAG 18:0;0_20:4;0	DAG	0.0100234	0.0988471
DAG 18:0;0_22:6;0	DAG	0.0159142	0.0632739
DAG 18:1;0_18:1;0	DAG	-0.0927632	0.0350825
DAG 18:1;0_18:2;0	DAG	-0.092382	0.0392704
DAG 18:1;0_18:3;0	DAG	-0.0836176	0.0493395
DAG 18:1;0_20:1;0	DAG	-0.0780904	0.0167987
DAG 18:1;0_20:3;0	DAG	-0.0948411	0.0320119
DAG 18:1;0_20:4;0	DAG	-0.0501362	0.0947139
DAG 18:1;0_22:6;0	DAG	0.0113174	0.0483921
DAG 18:2;0_18:2;0	DAG	-0.0898941	0.0154425
HexCer 40:1;2	HexCer	0.0310811	0.0644229
LPA 20:2;0	LPA	-0.0215967	-0.0197427
LPC 16:0;0	LPC	-0.0400345	0.100014
LPC 16:1;0	LPC	0.025369	0.0664657
LPC 18:0;0	LPC	-0.0232794	0.108662
LPC 18:1;0	LPC	-0.0249154	0.104926
LPC 18:2;0	LPC	-0.0181552	0.0627006
LPC 20:1;0	LPC	0	0
LPC 20:3;0	LPC	0.0221393	0.0787192
LPC 20:4;0	LPC	0.0237392	0.059842
LPC 22:6;0	LPC	0.0182731	0.0739969
LPE 16:0;0	LPE	-0.0268506	0.107142
LPE 16:1;0	LPE	0.0216166	0.0171195
LPE 18:0;0	LPE	-0.012696	0.102255
LPE 18:1;0	LPE	-0.0301638	0.106931
LPE 18:2;0	LPE	0.0218071	0.0557736
LPE 20:0;0	LPE	0	0
LPE 20:1;0	LPE	0.00211904	0.0379368
LPE 20:4;0	LPE	-0.0210475	0.0901402
LPE 22:6;0	LPE	0.0292841	0.0514399
LPE O-14:1;0	LPE O-	-0.0746941	0.0647828
LPG 16:0;0	LPG	0.00974741	0.0244353
LPG 18:1;0	LPG	0.0271671	0.0791707
LPI 18:0;0	LPI	0.0477539	0.0853275
LPI 20:4;0	LPI	0.0273536	0.0393032
LPS 18:0;0	LPS	0.0096451	0.0230618
LPS 20:4;0	LPS	0	0
LPS 22:6;0	LPS	-0.00487341	-0.00275706
PA 14:0;0_18:1;0	PA	0.00518536	0.00191611
PA 16:0;0_16:1;0	PA	0.0052816	0.0286827
PA 16:0;0_18:1;0	PA	0.0110588	0.059925
PA 16:0;0_18:2;0	PA	0.00309472	-0.00680734
PA 16:1;0_18:1;0	PA	0.0188907	0.0552871
PA 18:0;0_18:2;0	PA	0.00433443	0.017688
PA 18:0;0_20:4;0	PA	-0.00176153	0.0415464
PA 18:1;0_18:1;0	PA	0.0121651	0.0597757
PA 18:1;0_18:2;0	PA	0.0113868	0.0588287
PA 18:1;0_20:3;0	PA	0.00475967	0.00785041
PC 14:0;0_16:0;0	PC	-0.00604605	0.012894
PC 14:0;0_18:0;0	PC	0.00479706	-0.00342381
PC 14:0;0_18:1;0	PC	0.0281745	0.0559769
PC 14:0;0_18:2;0	PC	0.00532125	-0.00275273
PC 15:0;0_18:1;0	PC	0.0395168	0.0392742
PC 15:0;0_18:2;0	PC	0.000326157	0.00744825
PC 16:0;0_16:0;0	PC	0.0317815	0.0972799
PC 16:0;0_16:1;0	PC	0.039035	0.0739862
PC 16:0;0_17:1;0	PC	0.0335293	0.0681697
PC 16:0;0_18:1;0	PC	0.0373638	0.0958519
PC 16:0;0_18:2;0	PC	0.0462079	0.0885104
PC 16:0;0_18:3;0	PC	0.0108553	0.0202793
PC 16:0;0_20:1;0	PC	0.0351835	0.0789702
PC 16:0;0_20:2;0	PC	0.0381578	0.0602633
PC 16:0;0_20:3;0	PC	0.0460104	0.0945087
PC 16:0;0_20:4;0	PC	0.0477513	0.0957958
PC 16:0;0_20:5;0	PC	0.0132297	0.0330856
PC 16:0;0_22:4;0	PC	-0.0078435	-0.0092103
PC 16:0;0_22:5;0	PC	0.0442227	0.0703621
PC 16:0;0_22:6;0	PC	0.048686	0.0936035
PC 16:1;0_16:1;0	PC	0.0235244	0.0359351
PC 16:1;0_17:0;0	PC	0.03571	0.0196925
PC 16:1;0_18:0;0	PC	0.020795	0.0640978
PC 16:1;0_18:1;0	PC	0.0353837	0.105013
PC 16:1;0_18:2;0	PC	0.0321991	0.0420166
PC 16:1;0_20:3;0	PC	-0.00641547	-0.00908942
PC 16:1;0_20:4;0	PC	0.0169721	0.0217024
PC 16:1;0_22:5;0	PC	0	0
PC 16:1;0_22:6;0	PC	0.010506	0.0356632
PC 17:0;0_18:1;0	PC	0.00506757	0.00419622
PC 17:0;0_18:2;0	PC	0.00636554	0.00488931
PC 17:0;0_20:4;0	PC	0	0
PC 18:0;0_18:1;0	PC	0.0295769	0.0938073
PC 18:0;0_18:2;0	PC	0.0434606	0.0906666
PC 18:0;0_18:3;0	PC	0.00979323	0.0131578
PC 18:0;0_20:2;0	PC	0.00935464	0.0308831
PC 18:0;0_20:3;0	PC	0.0507217	0.0902123
PC 18:0;0_20:4;0	PC	0.0485218	0.0894838
PC 18:0;0_20:5;0	PC	0.00245679	-0.0195524
PC 18:0;0_22:4;0	PC	0.0160358	0.0656143
PC 18:0;0_22:5;0	PC	0.00575151	0.0462218
PC 18:0;0_22:6;0	PC	0.0511882	0.0900812
PC 18:1;0_18:1;0	PC	0.0342017	0.0996473
PC 18:1;0_18:2;0	PC	0.0418525	0.095999
PC 18:1;0_18:3;0	PC	0	0
PC 18:1;0_20:1;0	PC	-0.00199167	0.00841195
PC 18:1;0_20:2;0	PC	0.0109529	0.0367794
PC 18:1;0_20:3;0	PC	0.0451529	0.0887349
PC 18:1;0_20:4;0	PC	0.0389758	0.0970719
PC 18:1;0_22:5;0	PC	0.0195088	0.0545099
PC 18:1;0_22:6;0	PC	0.0392375	0.081754
PC 18:2;0_18:2;0	PC	0.0435505	0.0778159
PC 18:2;0_20:0;0	PC	-0.00043807	-0.000670986
PC 18:2;0_20:1;0	PC	0.00573691	0.0447012
PC 18:2;0_20:2;0	PC	0	0
PC 18:2;0_20:3;0	PC	0.0257449	0.0368324
PC 18:2;0_20:4;0	PC	0.04898	0.0657721
PC 18:2;0_22:6;0	PC	-0.00419765	0.00938844
PC 20:0;0_20:4;0	PC	0	0
PC 20:1;0_20:4;0	PC	0.00415711	0.0288114
PC 20:3;0_20:4;0	PC	0.0124015	0.0205744
PC 20:4;0_20:4;0	PC	0.0105066	0.00766742
PE 14:0;0_18:1;0	PE	0	0
PE 16:0;0_16:1;0	PE	0.0242363	0.00637569
PE 16:0;0_18:0;0	PE	0	0
PE 16:0;0_18:1;0	PE	0.0332815	0.0933969
PE 16:0;0_18:2;0	PE	0.0498697	0.0661608
PE 16:0;0_18:3;0	PE	0.00301953	0.00116036
PE 16:0;0_20:1;0	PE	0.0060449	0.0594898
PE 16:0;0_20:3;0	PE	0.0538575	0.0728093
PE 16:0;0_20:4;0	PE	0.0497975	0.0758448
PE 16:0;0_20:5;0	PE	-0.00647828	-0.0375798
PE 16:0;0_22:4;0	PE	0.000784207	-0.00448343
PE 16:0;0_22:5;0	PE	0.0556321	0.0815981
PE 16:0;0_22:6;0	PE	0.0560722	0.0797477
PE 16:1;0_18:0;0	PE	0.0336463	0.0436496
PE 16:1;0_18:1;0	PE	0.0391374	0.0779332
PE 16:1;0_18:2;0	PE	0.0248647	0.0278443
PE 16:1;0_20:3;0	PE	0.0059201	0.0162699
PE 16:1;0_20:4;0	PE	0.0484898	0.0633404
PE 16:1;0_22:6;0	PE	0.0178221	0.0268807
PE 17:0;0_20:4;0	PE	0.00563858	0.00627223
PE 18:0;0_18:1;0	PE	0.0236672	0.092563
PE 18:0;0_18:2;0	PE	0.0542875	0.0806203
PE 18:0;0_18:3;0	PE	0.00783843	-0.000752289
PE 18:0;0_20:1;0	PE	0.0128059	0.0689644
PE 18:0;0_20:2;0	PE	-0.00230024	0.0232895
PE 18:0;0_20:3;0	PE	0.0518172	0.0912703
PE 18:0;0_20:4;0	PE	0.036953	0.0618264
PE 18:0;0_20:5;0	PE	0.0384571	0.00540378
PE 18:0;0_22:4;0	PE	-0.00268968	0.045164
PE 18:0;0_22:5;0	PE	0.0480082	0.0748345
PE 18:0;0_22:6;0	PE	0.0554933	0.0761504
PE 18:1;0_18:1;0	PE	0.0466449	0.103957
PE 18:1;0_18:2;0	PE	0.0502152	0.0905873
PE 18:1;0_18:3;0	PE	0	0
PE 18:1;0_20:1;0	PE	0.0123176	0.0420107
PE 18:1;0_20:2;0	PE	-0.000365916	0.00520931
PE 18:1;0_20:3;0	PE	0.0486157	0.0878642
PE 18:1;0_20:4;0	PE	0.0517386	0.0896209
PE 18:1;0_20:5;0	PE	0.0106758	-0.0115477
PE 18:1;0_22:5;0	PE	0.00571625	0.0488626
PE 18:1;0_22:6;0	PE	0.0642727	0.0773422
PE 18:2;0_18:2;0	PE	0.0273562	0.0444239
PE 18:2;0_20:0;0	PE	0	0
PE 18:2;0_20:1;0	PE	-0.00271607	-0.00299782
PE 18:2;0_20:3;0	PE	0	0
PE 18:2;0_20:4;0	PE	0.00443955	0.00134626
PE 18:2;0_22:6;0	PE	0.00205022	0.00438026
PE 19:0;0_20:4;0	PE	0.00318122	0.0136225
PE 20:0;0_20:4;0	PE	0.00664985	0.014888
PE 20:1;0_20:4;0	PE	0.00885033	0.0403362
PE 20:1;0_22:6;0	PE	0.0156988	0.0680193
PE 20:4;0_20:4;0	PE	0.0148527	0.0691492
PE 22:6;0_22:6;0	PE	0.00306553	-0.00443052
PE O-16:0;0/22:6;0	PE O-	0	0
PE O-16:1;0/20:4;0	PE O-	0.0319291	0.0675106
PE O-16:1;0/22:4;0	PE O-	0.00766772	0.0532396
PE O-16:1;0/22:5;0	PE O-	-0.00225849	0.0208123
PE O-16:1;0/22:6;0	PE O-	0.00211555	0.0393041
PE O-18:1;0/20:4;0	PE O-	-0.00180396	0.0279106
PE O-18:1;0/22:4;0	PE O-	0.00892916	0.00600299
PE O-18:1;0/22:5;0	PE O-	0.00200328	0.00793244
PE O-18:1;0/22:6;0	PE O-	0	0
PE O-18:2;0/20:3;0	PE O-	0.00844641	0.0215868
PE O-18:2;0/20:4;0	PE O-	0.0082408	0.0503056
PE O-20:1;0/20:4;0	PE O-	-0.00074455	0.0165097
PE O-22:0;0/16:0;0	PE O-	0.00633586	0.000592709
PG 16:0;0_16:0;0	PG	0.0123334	0.0148114
PG 16:0;0_16:1;0	PG	-0.00125049	0.00236636
PG 16:0;0_18:0;0	PG	0	0
PG 16:0;0_18:1;0	PG	0.0210966	0.0465521
PG 16:0;0_18:2;0	PG	0.0274236	0.00910381
PG 16:0;0_20:4;0	PG	0.000753731	-0.00331723
PG 16:1;0_18:0;0	PG	-0.00424582	-0.0502941
PG 16:1;0_18:1;0	PG	0.0386239	0.0796902
PG 16:1;0_18:2;0	PG	-0.00190457	0.00778617
PG 16:1;0_20:3;0	PG	0.00701071	0.0170479
PG 16:1;0_22:4;0	PG	0	0
PG 16:1;0_22:5;0	PG	0	0
PG 16:1;0_22:6;0	PG	0.0102765	0.0610625
PG 18:0;0_18:1;0	PG	0.0133731	0.0638762
PG 18:0;0_18:2;0	PG	0.0289222	0.0292762
PG 18:0;0_20:4;0	PG	0.00588205	-0.00696408
PG 18:0;0_22:6;0	PG	0.00054894	0.0187148
PG 18:1;0_18:1;0	PG	0.0209321	0.101402
PG 18:1;0_18:2;0	PG	0.039863	0.0870132
PG 18:1;0_20:2;0	PG	0	0
PG 18:1;0_20:3;0	PG	0.00972332	0.0595187
PG 18:1;0_20:4;0	PG	0.0187962	0.0773981
PG 18:1;0_22:5;0	PG	0.00825441	0.0630999
PG 18:1;0_22:6;0	PG	0.015352	0.0708401
PG 18:2;0_18:2;0	PG	0.0135126	0.0671723
PG 18:2;0_20:3;0	PG	0	0
PG 18:2;0_20:4;0	PG	0	0
PG 18:2;0_22:6;0	PG	0.0145076	0.0675239
PG 20:3;0_20:3;0	PG	0.00936965	0.00923293
PG 20:3;0_20:4;0	PG	0.0269992	0.051027
PG 20:4;0_20:4;0	PG	0.00345124	0.0327143
PG 22:5;0_22:6;0	PG	0	0
PG 22:6;0_22:6;0	PG	0.00745208	0.0611209
PI 16:0;0_18:1;0	PI	-0.0041001	-0.0282708
PI 16:0;0_18:2;0	PI	-0.00129554	0.0322615
PI 16:0;0_20:2;0	PI	0	0
PI 16:0;0_20:3;0	PI	0.0476519	0.0758716
PI 16:0;0_20:4;0	PI	0.0546234	0.0863439
PI 17:0;0_20:4;0	PI	0	0
PI 18:0;0_18:1;0	PI	0.00488146	0.0540235
PI 18:0;0_18:2;0	PI	0.0380389	0.0721109
PI 18:0;0_18:3;0	PI	0	0
PI 18:0;0_20:2;0	PI	0.00952986	0.0433088
PI 18:0;0_20:3;0	PI	0.0411173	0.103095
PI 18:0;0_20:4;0	PI	0.0515952	0.0951041
PI 18:0;0_22:4;0	PI	0.00848741	0.0540125
PI 18:0;0_22:5;0	PI	0.0169318	0.0705027
PI 18:0;0_22:6;0	PI	0.00870483	0.0251173
PI 18:1;0_18:1;0	PI	0.0332768	0.065271
PI 18:1;0_18:2;0	PI	-0.00488631	0.0298253
PI 18:1;0_20:3;0	PI	-5.84961e-05	0.0371882
PI 18:1;0_20:4;0	PI	0.0523239	0.0843538
PI 18:2;0_18:2;0	PI	0.0166776	0.018098
PI 18:2;0_20:4;0	PI	0.00473891	0.0158535
PI 20:0;0_20:4;0	PI	-4.33738e-05	0.0116383
PS 16:0;0_20:4;0	PS	0.0157164	0.0781186
PS 16:0;0_22:6;0	PS	0.00892237	0.0575704
PS 18:0;0_18:1;0	PS	0.0348236	0.0818458
PS 18:0;0_18:2;0	PS	0.0292144	0.0301914
PS 18:0;0_20:3;0	PS	0.004925	0.032822
PS 18:0;0_20:4;0	PS	0.0422252	0.0811512
PS 18:0;0_22:4;0	PS	0.0109616	0.0162528
PS 18:0;0_22:5;0	PS	0.00955771	0.0618206
PS 18:0;0_22:6;0	PS	0.025746	0.0597403
PS 18:1;0_18:1;0	PS	0.0128554	0.038088
PS 18:1;0_20:4;0	PS	-0.00563028	0.0325323
PS 18:2;0_18:2;0	PS	0.00172019	-0.00904103
PS 18:2;0_20:3;0	PS	-0.0101433	-0.0185089
PS 18:2;0_20:4;0	PS	-0.00690131	-0.00409471
PS 18:2;0_22:5;0	PS	0	0
PS 20:0;0_20:4;0	PS	0	0
PS 20:1;0_20:4;0	PS	0	0
PS 20:3;0_20:3;0	PS	-3.86273e-05	0.00331032
SM 29:0;2	SM	-0.0235703	0.0230477
SM 29:1;3	SM	-0.0017317	0.00128012
SM 30:2;2	SM	0	0
SM 34:1;2	SM	0.0310858	0.0854148
SM 35:2;3	SM	0	0
SM 36:1;2	SM	0.00984976	0.0495104
SM 36:2;3	SM	-0.0115194	-0.0231807
SM 37:1;2	SM	-0.00444779	0.00884586
SM 38:1;2	SM	0.0138704	0.066163
SM 38:3;2	SM	8.89078e-05	-0.00318606
SM 39:1;3	SM	-0.000411777	0.0114485
SM 39:2;2	SM	0	0
SM 39:3;2	SM	-0.0207504	0.00528262
SM 40:1;2	SM	0.0325995	0.0859405
SM 40:2;2	SM	0.0270074	0.0605775
SM 41:1;2	SM	0.0450215	0.057809
SM 41:3;2	SM	-0.0174098	-0.00570781
SM 42:1;2	SM	0.046836	0.0791569
SM 42:2;2	SM	0.0292008	0.0865479
SM 43:3;2	SM	-0.00800687	0.0107401
TAG 36:0;0	TAG	-0.0718901	0.0730682
TAG 38:0;0	TAG	-0.0794485	0.0557832
TAG 40:0;0	TAG	-0.092832	0.0347127
TAG 40:1;0	TAG	-0.0895779	0.0414022
TAG 42:0;0	TAG	-0.0960495	0.0195841
TAG 42:1;0	TAG	-0.097918	0.0267604
TAG 42:2;0	TAG	-0.0856597	0.0371877
TAG 44:0;0	TAG	-0.0975958	0.0177774
TAG 44:1;0	TAG	-0.0987517	0.028206
TAG 44:2;0	TAG	-0.098463	0.0283477
TAG 44:3;0	TAG	-0.00584276	0.012603
TAG 45:1;0	TAG	-0.0832399	0.0547966
TAG 46:0;0	TAG	-0.0998981	0.0189037
TAG 46:1;0	TAG	-0.10031	0.030471
TAG 46:2;0	TAG	-0.100625	0.0282201
TAG 46:3;0	TAG	-0.0986708	0.0333037
TAG 46:4;0	TAG	-0.0686339	0.0710323
TAG 47:1;0	TAG	-0.0894753	0.0431417
TAG 47:2;0	TAG	-0.0769636	0.0699078
TAG 48:0;0	TAG	-0.100188	0.0212708
TAG 48:1;0	TAG	-0.101524	0.0304403
TAG 48:2;0	TAG	-0.101628	0.0300034
TAG 48:3;0	TAG	-0.102171	0.0260412
TAG 48:4;0	TAG	-0.0833616	0.0585571
TAG 49:1;0	TAG	-0.101648	0.025808
TAG 49:2;0	TAG	-0.100398	0.0316381
TAG 49:3;0	TAG	-0.075125	0.0701103
TAG 50:0;0	TAG	-0.00372776	0.0036992
TAG 50:1;0	TAG	-0.101448	0.0329734
TAG 50:2;0	TAG	-0.101025	0.0351328
TAG 50:3;0	TAG	-0.101616	0.0319781
TAG 50:4;0	TAG	-0.102432	0.0263778
TAG 50:5;0	TAG	-0.0987619	0.0231617
TAG 50:6;0	TAG	-0.0387406	-0.0390418
TAG 51:1;0	TAG	-0.101486	0.0254298
TAG 51:2;0	TAG	-0.102529	0.0312117
TAG 51:3;0	TAG	-0.101827	0.0266687
TAG 51:4;0	TAG	-0.0723247	0.0713546
TAG 52:1;0	TAG	-0.0283436	-0.0134736
TAG 52:2;0	TAG	-0.0996149	0.0399832
TAG 52:3;0	TAG	-0.101227	0.0350357
TAG 52:4;0	TAG	-0.102079	0.031349
TAG 52:5;0	TAG	-0.101621	0.0319862
TAG 52:6;0	TAG	-0.0953484	0.0111185
TAG 52:7;0	TAG	-0.0231915	-0.00364166
TAG 53:2;0	TAG	-0.101743	0.0276544
TAG 53:3;0	TAG	-0.10087	0.0264152
TAG 53:4;0	TAG	-0.0983135	0.0282073
TAG 53:5;0	TAG	0	0
TAG 54:1;0	TAG	-0.0994588	0.0361225
TAG 54:2;0	TAG	-0.101258	0.0349192
TAG 54:3;0	TAG	-0.0992065	0.0246415
TAG 54:4;0	TAG	-0.100375	0.0259743
TAG 54:5;0	TAG	-0.100915	0.0369534
TAG 54:6;0	TAG	-0.101482	0.0319108
TAG 54:7;0	TAG	-0.0990108	0.0262443
TAG 54:8;0	TAG	0	0
TAG 55:2;0	TAG	-0.0697953	0.0699245
TAG 55:3;0	TAG	-0.0907996	0.0172857
TAG 55:4;0	TAG	-0.0357944	-0.0130203
TAG 56:1;0	TAG	-0.0966126	0.0302469
TAG 56:2;0	TAG	-0.102803	0.0261759
TAG 56:3;0	TAG	-0.0974564	0.0159443
TAG 56:4;0	TAG	-0.0996883	0.0199419
TAG 56:5;0	TAG	-0.101404	0.0311536
TAG 56:6;0	TAG	-0.102181	0.0298203
TAG 56:7;0	TAG	-0.100787	0.0350918
TAG 56:8;0	TAG	-0.0981623	0.0414824
TAG 58:10;0	TAG	-0.0160018	0.00658693
TAG 58:2;0	TAG	-0.0605156	0.0678375
TAG 58:3;0	TAG	-0.0951866	0.0162823
TAG 58:4;0	TAG	-0.0943094	0.0208198
TAG 58:5;0	TAG	-0.0965363	0.0270087
TAG 58:6;0	TAG	-0.0986615	0.0309332
TAG 58:7;0	TAG	-0.0992593	0.0278721
TAG 58:8;0	TAG	-0.0973375	0.0288073
TAG 58:9;0	TAG	-0.0931567	0.0421009
TAG 60:8;0	TAG	0	0

## Sheet: E08_B
Fraction	ER_median	Cer 34:1;2	Cer 38:1;2
lipidomics_median_Fr.1	0.072892	0	0
lipidomics_median_Fr.2	0	0	0
lipidomics_median_Fr.3	0.108783	0	0
lipidomics_median_Fr.4	0.018075	0.652559	0
lipidomics_median_Fr.5	0.0746299	0.718397	0
lipidomics_median_Fr.6	0.298655	0.77584	0.810035
lipidomics_median_Fr.7	0.474931	0.849862	0.857193
lipidomics_median_Fr.8	1	1	1
lipidomics_median_Fr.9	0.663986	0.921565	0.94144
lipidomics_median_Fr.10	0.546712	0.82561	0.860403
lipidomics_median_Fr.11	0.467624	0.793135	0.900745
lipidomics_median_Fr.12	0.258653	0.65748	0.702473
lipidomics_median_Fr.13	0.355948	0.612719	0.622095
lipidomics_median_Fr.14	0.226073	0	0

## Sheet: E08_C
KDE Cytosol						KDE Mitochondria						KDE Nucleus						KDE Peroxisome						KDE Endosome						KDE LD
feature	lipid_class	db_norm	length_norm	intensity		feature	lipid_class	db_norm	length_norm	intensity		feature	lipid_class	db_norm	length_norm	intensity		feature	lipid_class	db_norm	length_norm	intensity		feature	lipid_class	db_norm	length_norm	intensity		feature	lipid_class	db_norm	length_norm	intensity
CE 16:0;0	CE	0	16	20.581		CL 68:5;0	CL	1.25	17	8.35911		DAG 16:0;0_18:0;0	DAG	0	17	0.505022		DAG 16:0;0_20:3;0	DAG	1.5	18	1.58495		CE 17:1;0	CE	1	17	10.8314		DAG 18:1;0_20:3;0	DAG	2	19	1.96074
CE 16:1;0	CE	1	16	69.8343		CL 70:4;0	CL	1	17.5	9.80208		DAG 16:0;0_18:2;0	DAG	1	17	35.7519		DAG 16:0;0_20:4;0	DAG	2	18	2.43941		DAG 12:0;0_18:1;0	DAG	0.5	15	3.9841		DAG 18:1;0_22:6;0	DAG	3.5	20	0.757243
CE 17:1;0	CE	1	17	17.7379		CL 70:5;0	CL	1.25	17.5	11.6203		DAG 16:0;0_20:4;0	DAG	2	18	0.88357		DAG 18:0;0_18:2;0	DAG	1	18	3.60464		DAG 14:0;0_16:1;0	DAG	0.5	15	2.67444		LPA 20:2;0	LPA	2	20	1.14901
CE 18:0;0	CE	0	18	8.92341		CL 70:6;0	CL	1.5	17.5	5.51123		LPA 20:2;0	LPA	2	20	1.57883		DAG 18:0;0_20:4;0	DAG	2	19	9.20343		SM 39:1;3	SM	0.5	19.5	6.69339		PC 16:0;0_20:5;0	PC	2.5	18	1.25491
CE 18:1;0	CE	1	18	94.5731		CL 70:7;0	CL	1.75	17.5	5.93741		LPC 16:0;0	LPC	0	16	17.1866		LPE 18:0;0	LPE	0	18	14.3368		SM 40:1;2	SM	0.5	20	18.5994		PC 16:1;0_16:1;0	PC	1	16	1.25822
CE 18:2;0	CE	2	18	23.7776		CL 72:6;0	CL	1.5	18	19.7854		LPC 18:0;0	LPC	0	18	21.5512		LPE 20:4;0	LPE	4	20	2.54708		SM 42:1;2	SM	0.5	21	7.5883		PC 18:0;0_22:4;0	PC	2	20	2.09856
CE 20:4;0	CE	4	20	12.1929		CL 72:7;0	CL	1.75	18	18.5637		LPC 18:2;0	LPC	2	18	1.87721		LPG 16:0;0	LPG	0	16	0.067677		SM 42:2;2	SM	1	21	8.30952		PE O-18:1;0/20:4;0	PE O-	2.5	19	0.906473
DAG 14:0;0_18:1;0	DAG	0.5	16	18.3337		CL 72:8;0	CL	2	18	5.54935		LPE 16:0;0	LPE	0	16	11.2818		LPI 18:0;0	LPI	0	18	6.63195		TAG 58:9;0	TAG	3	19.3333	2.44524		PE O-18:2;0/20:4;0	PE O-	3	19	1.19642
DAG 16:0;0_16:0;0	DAG	0	16	9.43456		CL 74:8;0	CL	2	18.5	16.7788		LPE 18:0;0	LPE	0	18	5.2981		LPI 20:4;0	LPI	4	20	1.79377								PS 18:0;0_20:3;0	PS	1.5	19	2.11679
DAG 16:0;0_16:1;0	DAG	0.5	16	19.4909		CL 74:9;0	CL	2.25	18.5	4.62437		LPI 18:0;0	LPI	0	18	2.83929		LPS 18:0;0	LPS	0	18	0.80044								SM 39:3;2	SM	1.5	19.5	0.606365
DAG 16:0;0_18:0;0	DAG	0	17	2.63729		Cer 39:1;2	Cer	0.5	19.5	0.192504		PC 16:0;0_16:0;0	PC	0	16	14.2664		PC 16:0;0_18:1;0	PC	0.5	17	215.917								SM 40:2;2	SM	1	20	0.955127
DAG 16:0;0_18:1;0	DAG	0.5	17	112.437		DAG 16:0;0_22:5;0	DAG	2.5	19	0.33999		PC 16:0;0_16:1;0	PC	0.5	16	39.6185		PC 16:0;0_18:2;0	PC	1	17	110.026								SM 41:3;2	SM	1.5	20.5	0.827249
DAG 16:1;0_18:1;0	DAG	1	17	38.7219		DAG 16:1;0_18:0;0	DAG	0.5	17	0.115201		PC 16:0;0_18:1;0	PC	0.5	17	72.5059		PC 16:0;0_18:3;0	PC	1.5	17	1.63185								TAG 36:0;0	TAG	0	12	1.04016
DAG 18:0;0_18:1;0	DAG	0.5	18	13.4835		DAG 18:0;0_20:4;0	DAG	2	19	1.84679		PC 16:0;0_18:2;0	PC	1	17	49.0773		PC 16:0;0_20:2;0	PC	1	18	8.32367								TAG 38:0;0	TAG	0	12.6667	0.971371
DAG 18:1;0_18:1;0	DAG	1	18	88.1949		LPC 20:3;0	LPC	3	20	0.303632		PC 16:0;0_20:1;0	PC	0.5	18	0.817318		PC 16:0;0_20:3;0	PC	1.5	18	37.4247								TAG 42:0;0	TAG	0	14	5.40013
DAG 18:1;0_18:2;0	DAG	1.5	18	38.1636		LPC 22:6;0	LPC	6	22	0.470546		PC 16:0;0_20:3;0	PC	1.5	18	14.9226		PC 16:0;0_20:4;0	PC	2	18	96.7261								TAG 42:2;0	TAG	0.666667	14	1.63951
DAG 18:1;0_20:1;0	DAG	1	19	5.38482		LPE 18:2;0	LPE	2	18	0.253591		PC 16:0;0_20:4;0	PC	2	18	33.9962		PC 16:0;0_22:4;0	PC	2	19	2.61488								TAG 44:0;0	TAG	0	14.6667	9.38718
LPC 18:1;0	LPC	1	18	4.83154		LPE 20:4;0	LPE	4	20	0.632902		PC 16:0;0_22:5;0	PC	2.5	19	7.92859		PC 16:0;0_22:5;0	PC	2.5	19	16.8874								TAG 44:1;0	TAG	0.333333	14.6667	24.8327
LPS 22:6;0	LPS	6	22	1.56318		LPG 16:0;0	LPG	0	16	0.105242		PC 16:0;0_22:6;0	PC	3	19	26.5421		PC 16:0;0_22:6;0	PC	3	19	73.2095								TAG 44:3;0	TAG	1	14.6667	0.581078
SM 29:0;2	SM	0	14.5	15.3836		LPI 20:4;0	LPI	4	20	1.28597		PC 16:1;0_18:1;0	PC	1	17	6.01826		PC 16:1;0_18:0;0	PC	0.5	17	4.60654								TAG 45:1;0	TAG	0.333333	15	2.31014
SM 36:2;3	SM	1	18	8.26225		LPS 18:0;0	LPS	0	18	1.25745		PC 18:0;0_18:1;0	PC	0.5	18	23.3458		PC 16:1;0_18:2;0	PC	1.5	17	3.41573								TAG 46:0;0	TAG	0	15.3333	11.7055
SM 37:1;2	SM	0.5	18.5	4.20181		PA 16:0;0_18:2;0	PA	1	17	2.30128		PC 18:0;0_18:2;0	PC	1	18	34.7396		PC 16:1;0_20:3;0	PC	2	18	4.88281								TAG 46:1;0	TAG	0.333333	15.3333	73.3309
TAG 40:0;0	TAG	0	13.3333	7.81912		PA 18:0;0_18:2;0	PA	1	18	0.546047		PC 18:0;0_20:2;0	PC	1	19	7.18915		PC 16:1;0_20:4;0	PC	2.5	18	14.0032								TAG 46:2;0	TAG	0.666667	15.3333	30.0967
TAG 42:0;0	TAG	0	14	13.7042		PA 18:1;0_20:3;0	PA	2	19	0.43097		PC 18:0;0_20:3;0	PC	1.5	19	12.3621		PC 16:1;0_22:6;0	PC	3.5	19	3.48305								TAG 47:1;0	TAG	0.333333	15.6667	2.13516
TAG 42:1;0	TAG	0.333333	14	13.9219		PC 14:0;0_16:0;0	PC	0	15	1.508		PC 18:0;0_20:4;0	PC	2	19	20.454		PC 18:0;0_18:1;0	PC	0.5	18	25.5601								TAG 47:2;0	TAG	0.666667	15.6667	1.17935
TAG 44:0;0	TAG	0	14.6667	19.568		PC 14:0;0_18:0;0	PC	0	16	1.52742		PC 18:0;0_22:6;0	PC	3	20	8.28709		PC 18:0;0_18:2;0	PC	1	18	71.368								TAG 48:0;0	TAG	0	16	12.6036
TAG 44:1;0	TAG	0.333333	14.6667	49.9844		PC 15:0;0_18:1;0	PC	0.5	16.5	0.663605		PC 18:1;0_18:1;0	PC	1	18	8.91357		PC 18:0;0_18:3;0	PC	1.5	18	1.637								TAG 48:1;0	TAG	0.333333	16	114.937
TAG 44:2;0	TAG	0.666667	14.6667	14.2591		PC 16:0;0_17:1;0	PC	0.5	16.5	0.277286		PC 18:1;0_18:2;0	PC	1.5	18	13.6995		PC 18:0;0_20:3;0	PC	1.5	19	28.0176								TAG 48:2;0	TAG	0.666667	16	100.797
TAG 46:0;0	TAG	0	15.3333	26.4521		PC 16:1;0_16:1;0	PC	1	16	1.74078		PC 18:1;0_20:3;0	PC	2	19	5.43356		PC 18:0;0_20:4;0	PC	2	19	56.194								TAG 48:3;0	TAG	1	16	16.8058
TAG 46:1;0	TAG	0.333333	15.3333	155.962		PC 16:1;0_17:0;0	PC	0.5	16.5	0.57854		PC 18:1;0_20:4;0	PC	2.5	19	12.5733		PC 18:0;0_22:6;0	PC	3	20	17.5744								TAG 49:2;0	TAG	0.666667	16.3333	5.90086
TAG 46:2;0	TAG	0.666667	15.3333	62.5209		PC 16:1;0_20:3;0	PC	2	18	6.3859		PE 18:0;0_20:3;0	PE	1.5	19	1.07415		PC 18:1;0_18:1;0	PC	1	18	19.9818								TAG 49:3;0	TAG	1	16.3333	2.09046
TAG 46:3;0	TAG	1	15.3333	13.8678		PC 17:0;0_18:1;0	PC	0.5	17.5	3.28809		PE 18:1;0_18:1;0	PE	1	18	0.642206		PC 18:1;0_18:2;0	PC	1.5	18	36.4379								TAG 50:1;0	TAG	0.333333	16.6667	168.695
TAG 48:0;0	TAG	0	16	27.0432		PC 18:0;0_18:3;0	PC	1.5	18	0.459741		PE O-16:1;0/20:4;0	PE O-	2.5	18	0.771828		PC 18:1;0_20:1;0	PC	1	19	2.04912								TAG 50:2;0	TAG	0.666667	16.6667	343.423
TAG 48:1;0	TAG	0.333333	16	240.769		PC 18:0;0_20:2;0	PC	1	19	6.27818		PG 16:0;0_16:0;0	PG	0	16	0.713224		PC 18:1;0_20:2;0	PC	1.5	19	4.49678								TAG 50:3;0	TAG	1	16.6667	88.8952
TAG 48:2;0	TAG	0.666667	16	210.517		PC 18:0;0_20:5;0	PC	2.5	19	2.51467		PG 16:1;0_18:2;0	PG	1.5	17	0.860564		PC 18:1;0_20:3;0	PC	2	19	13.099								TAG 50:4;0	TAG	1.33333	16.6667	11.3141
TAG 48:3;0	TAG	1	16	36.6562		PC 18:1;0_20:1;0	PC	1	19	0.661194		PG 18:1;0_18:1;0	PG	1	18	2.07177		PC 18:1;0_20:4;0	PC	2.5	19	31.2537								TAG 51:2;0	TAG	0.666667	17	11.7439
TAG 48:4;0	TAG	1.33333	16	3.39924		PC 18:2;0_20:1;0	PC	1.5	19	4.94421		PG 20:3;0_20:3;0	PG	3	20	0.0954194		PC 18:1;0_22:5;0	PC	3	20	11.68								TAG 51:4;0	TAG	1.33333	17	3.90267
TAG 49:1;0	TAG	0.333333	16.3333	7.90375		PC 18:2;0_22:6;0	PC	4	20	7.12953		PG 20:3;0_20:4;0	PG	3.5	20	0.427643		PC 18:1;0_22:6;0	PC	3.5	20	17.5099								TAG 52:2;0	TAG	0.666667	17.3333	735.511
TAG 50:0;0	TAG	0	16.6667	2.67699		PC 20:1;0_20:4;0	PC	2.5	20	1.70676		PI 16:0;0_18:1;0	PI	0.5	17	0.284234		PC 18:2;0_18:2;0	PC	2	18	6.21791								TAG 52:3;0	TAG	1	17.3333	268.017
TAG 50:1;0	TAG	0.333333	16.6667	368.777		PC 20:3;0_20:4;0	PC	3.5	20	9.73462		PI 16:0;0_20:4;0	PI	2	18	5.16569		PC 18:2;0_20:3;0	PC	2.5	19	3.0092								TAG 52:4;0	TAG	1.33333	17.3333	55.7237
TAG 50:2;0	TAG	0.666667	16.6667	710.8		PC 20:4;0_20:4;0	PC	4	20	1.73391		PI 18:0;0_20:2;0	PI	1	19	0.643052		PC 18:2;0_20:4;0	PC	3	19	19.3785								TAG 52:5;0	TAG	1.66667	17.3333	11.1727
TAG 50:3;0	TAG	1	16.6667	185.469		PE 16:0;0_16:1;0	PE	0.5	16	0.20183		PI 18:0;0_20:3;0	PI	1.5	19	10.6973		PC 20:1;0_20:4;0	PC	2.5	20	3.4206								TAG 53:3;0	TAG	1	17.6667	4.36429
TAG 50:4;0	TAG	1.33333	16.6667	25.4222		PE 16:0;0_18:3;0	PE	1.5	17	0.395077		PI 18:0;0_20:4;0	PI	2	19	51.6531		PC 20:4;0_20:4;0	PC	4	20	2.26625								TAG 54:1;0	TAG	0.333333	18	7.89616
TAG 51:2;0	TAG	0.666667	17	21.903		PE 16:0;0_20:4;0	PE	2	18	8.39024		PI 18:0;0_22:4;0	PI	2	20	1.62691		PE 16:0;0_16:1;0	PE	0.5	16	0.963021								TAG 54:2;0	TAG	0.666667	18	58.0581
TAG 52:1;0	TAG	0.333333	17.3333	24.9101		PE 16:1;0_18:0;0	PE	0.5	17	0.285643		PI 18:1;0_20:4;0	PI	2.5	19	2.70394		PE 16:0;0_18:1;0	PE	0.5	17	9.18858								TAG 54:3;0	TAG	1	18	132.697
TAG 52:2;0	TAG	0.666667	17.3333	1301.67		PE 16:1;0_20:3;0	PE	2	18	3.90539		PS 18:0;0_18:1;0	PS	0.5	18	0.544761		PE 16:0;0_18:2;0	PE	1	17	12.333								TAG 54:4;0	TAG	1.33333	18	55.9135
TAG 52:3;0	TAG	1	17.3333	575.671		PE 17:0;0_20:4;0	PE	2	18.5	2.50838		SM 29:0;2	SM	0	14.5	4.46711		PE 16:0;0_20:3;0	PE	1.5	18	2.84759								TAG 54:5;0	TAG	1.66667	18	28.3492
TAG 52:4;0	TAG	1.33333	17.3333	92.984		PE 18:0;0_18:3;0	PE	1.5	18	0.608426		SM 34:1;2	SM	0.5	17	8.59081		PE 16:0;0_20:4;0	PE	2	18	43.8147								TAG 54:6;0	TAG	2	18	12.2773
TAG 52:5;0	TAG	1.66667	17.3333	22.4752		PE 18:0;0_20:1;0	PE	0.5	19	1.62355		SM 36:2;3	SM	1	18	10.6023		PE 16:0;0_20:5;0	PE	2.5	18	1.37342								TAG 55:3;0	TAG	1	18.3333	3.8798
TAG 53:2;0	TAG	0.666667	17.6667	12.1144		PE 18:0;0_20:4;0	PE	2	19	53.6523		SM 37:1;2	SM	0.5	18.5	1.22012		PE 16:0;0_22:5;0	PE	2.5	19	7.1298								TAG 55:4;0	TAG	1.33333	18.3333	3.05227
TAG 53:3;0	TAG	1	17.6667	8.50491		PE 18:0;0_20:5;0	PE	2.5	19	1.05861								PE 16:0;0_22:6;0	PE	3	19	81.9405								TAG 56:1;0	TAG	0.333333	18.6667	1.75057
TAG 54:1;0	TAG	0.333333	18	15.0235		PE 18:2;0_18:2;0	PE	2	18	1.56727								PE 16:1;0_18:0;0	PE	0.5	17	1.24523								TAG 56:2;0	TAG	0.666667	18.6667	7.3793
TAG 54:2;0	TAG	0.666667	18	103.494		PE 18:2;0_20:1;0	PE	1.5	19	2.65716								PE 16:1;0_18:1;0	PE	1	17	1.38748								TAG 56:3;0	TAG	1	18.6667	19.378
TAG 54:3;0	TAG	1	18	279.313		PE 18:2;0_20:4;0	PE	3	19	1.4061								PE 16:1;0_20:4;0	PE	2.5	18	2.38865								TAG 56:4;0	TAG	1.33333	18.6667	10.1733
TAG 54:4;0	TAG	1.33333	18	119.002		PE 18:2;0_22:6;0	PE	4	20	3.18253								PE 16:1;0_22:6;0	PE	3.5	19	3.8352								TAG 56:5;0	TAG	1.66667	18.6667	11.9515
TAG 54:5;0	TAG	1.66667	18	55.0414		PE 19:0;0_20:4;0	PE	2	19.5	2.75576								PE 18:0;0_18:1;0	PE	0.5	18	4.45097								TAG 56:6;0	TAG	2	18.6667	12.1818
TAG 54:6;0	TAG	2	18	26.1776		PE 20:0;0_20:4;0	PE	2	20	3.45983								PE 18:0;0_18:2;0	PE	1	18	21.694								TAG 56:7;0	TAG	2.33333	18.6667	12.926
TAG 54:7;0	TAG	2.33333	18	14.5575		PE 20:1;0_20:4;0	PE	2.5	20	0.607633								PE 18:0;0_20:3;0	PE	1.5	19	3.14383								TAG 56:8;0	TAG	2.66667	18.6667	4.1271
TAG 56:1;0	TAG	0.333333	18.6667	3.21646		PE 20:1;0_22:6;0	PE	3.5	21	1.98309								PE 18:0;0_20:4;0	PE	2	19	102.566								TAG 58:10;0	TAG	3.33333	19.3333	0.882839
TAG 56:2;0	TAG	0.666667	18.6667	13.4315		PE 20:4;0_20:4;0	PE	4	20	2.47415								PE 18:0;0_20:5;0	PE	2.5	19	0.757285								TAG 58:4;0	TAG	1.33333	19.3333	3.90644
TAG 56:3;0	TAG	1	18.6667	33.2175		PE 22:6;0_22:6;0	PE	6	22	1.426								PE 18:0;0_22:5;0	PE	2.5	20	5.8793								TAG 58:5;0	TAG	1.66667	19.3333	3.26513
TAG 56:4;0	TAG	1.33333	18.6667	22.6463		PE O-16:1;0/22:4;0	PE O-	2.5	19	0.590573								PE 18:0;0_22:6;0	PE	3	20	33.4014								TAG 58:6;0	TAG	2	19.3333	2.09249
TAG 56:5;0	TAG	1.66667	18.6667	25.1343		PE O-18:1;0/20:4;0	PE O-	2.5	19	1.05119								PE 18:1;0_18:1;0	PE	1	18	1.79261								TAG 58:9;0	TAG	3	19.3333	1.8887
TAG 56:6;0	TAG	2	18.6667	28.1081		PE O-18:1;0/22:4;0	PE O-	2.5	20	0.997653								PE 18:1;0_18:2;0	PE	1.5	18	6.93043
TAG 56:7;0	TAG	2.33333	18.6667	35.1369		PE O-18:2;0/20:3;0	PE O-	2.5	19	0.424808								PE 18:1;0_20:3;0	PE	2	19	5.36576
TAG 56:8;0	TAG	2.66667	18.6667	9.6448		PE O-18:2;0/20:4;0	PE O-	3	19	0.625545								PE 18:1;0_20:4;0	PE	2.5	19	24.5962
						PE O-20:1;0/20:4;0	PE O-	2.5	20	0.793659								PE 18:1;0_20:5;0	PE	3	19	2.19811
						PG 16:0;0_16:0;0	PG	0	16	0.864849								PE 18:1;0_22:5;0	PE	3	20	2.86566
						PG 16:0;0_16:1;0	PG	0.5	16	0.844539								PE 18:1;0_22:6;0	PE	3.5	20	10.1704
						PG 16:0;0_18:1;0	PG	0.5	17	4.08574								PE 18:2;0_18:2;0	PE	2	18	1.16665
						PG 16:0;0_18:2;0	PG	1	17	0.21639								PE 18:2;0_20:4;0	PE	3	19	3.71968
						PG 18:0;0_22:6;0	PG	3	20	1.63957								PE 20:1;0_20:4;0	PE	2.5	20	2.29197
						PG 20:3;0_20:3;0	PG	3	20	0.0822365								PE O-22:0;0/16:0;0	PE O-	0	19	9.85462
						PI 16:0;0_18:2;0	PI	1	17	1.13007								PG 16:0;0_18:1;0	PG	0.5	17	3.04743
						PI 18:0;0_18:1;0	PI	0.5	18	1.09618								PG 16:0;0_18:2;0	PG	1	17	0.358336
						PI 18:0;0_20:2;0	PI	1	19	3.39954								PG 16:1;0_20:3;0	PG	2	18	0.378086
						PI 18:0;0_22:6;0	PI	3	20	1.57668								PG 18:2;0_18:2;0	PG	2	18	0.814007
						PI 18:2;0_20:4;0	PI	3	19	3.50761								PI 16:0;0_20:3;0	PI	1.5	18	3.55901
						PS 18:0;0_22:5;0	PS	2.5	20	4.01069								PI 16:0;0_20:4;0	PI	2	18	9.8432
						PS 18:2;0_20:3;0	PS	2.5	19	1.08607								PI 18:0;0_18:2;0	PI	1	18	1.28273
						SM 36:1;2	SM	0.5	18	1.65645								PI 18:0;0_20:3;0	PI	1.5	19	22.8436
						SM 38:1;2	SM	0.5	19	1.28589								PI 18:0;0_20:4;0	PI	2	19	104.29
						SM 40:2;2	SM	1	20	0.871944								PI 18:1;0_18:1;0	PI	1	18	0.433171
																		PI 18:1;0_18:2;0	PI	1.5	18	1.16299
																		PI 18:1;0_20:3;0	PI	2	19	2.92977
																		PI 18:2;0_18:2;0	PI	2	18	0.592833
																		PI 20:0;0_20:4;0	PI	2	20	2.07132
																		PS 18:2;0_20:3;0	PS	2.5	19	0.686129

## Sheet: E08_D
TAG				DAG				PA				PI				PG				PS				PC				LPC				PEROXISOME				PE-O-
	w_db	w_length			w_db	w_length			w_db	w_length			w_db	w_length			w_db	w_length			w_db	w_length			w_db	w_length			w_db	w_length			w_db	w_length			w_db	w_length
PEROXISOME				PEROXISOME	1.73877	18.5468		PEROXISOME				PEROXISOME	1.89599	18.9007		PEROXISOME	0.927875	17.2593		PEROXISOME	2.5	19		PEROXISOME	1.53826	18.0238		PEROXISOME				PEROXISOME	2.24886	18.7931		CYTOPLASM
CYTOPLASM	0.760305	16.9782		CYTOPLASM	0.78381	17.2985		CYTOPLASM				CYTOPLASM				CYTOPLASM				CYTOPLASM				CYTOPLASM				CYTOPLASM	1	18		CYTOPLASM				ER	0.881437	18.7425
ER				ER	2.69059	18.8799		ER	0.965227	17.4451		ER	1.93915	18.9496		ER	2.41175	18.8057		ER	2.59856	18.7611		ER	2.23664	18.6331		ER				ER	2.12545	18.8851		ENDOSOME-VESICLE
ENDOSOME-VESICLE	3	19.3333		ENDOSOME-VESICLE	0.5	15		ENDOSOME-VESICLE				ENDOSOME-VESICLE				ENDOSOME-VESICLE				ENDOSOME-VESICLE				ENDOSOME-VESICLE				ENDOSOME-VESICLE				ENDOSOME-VESICLE				GOLGI APPARATUS
GOLGI APPARATUS	0.752126	16.9857		GOLGI APPARATUS	0.822494	17.0166		GOLGI APPARATUS	0.5	16		GOLGI APPARATUS	3	19.3784		GOLGI APPARATUS	1.53761	17.6917		GOLGI APPARATUS				GOLGI APPARATUS				GOLGI APPARATUS	0.977702	17.1014		GOLGI APPARATUS				NUCLEUS	2.5	18
NUCLEUS				NUCLEUS	1.01019	17.0238		NUCLEUS				NUCLEUS	1.93039	18.9436		NUCLEUS	1.23437	17.7023		NUCLEUS	0.5	18		NUCLEUS	1.23838	17.6939		NUCLEUS	0.0924394	17.1537		NUCLEUS	1.31292	18.6258		PM	3.0287	19
PM	3.33333	19.3333		PM	2.42418	19.193		PM	1.22131	17.4426		PM	2.00525	19.2042		PM	2.30671	18.8544		PM	2.38107	19.3374		PM	1.22584	17.4664		PM				PM	2.57135	19.6456		MITOCHONDRIA	2.56976	19.3995
MITOCHONDRIA				MITOCHONDRIA	1.99878	18.8999		MITOCHONDRIA	1.13146	17.4295		MITOCHONDRIA	1.89826	18.8338		MITOCHONDRIA	1.01469	17.4469		MITOCHONDRIA	2.5	19.7869		MITOCHONDRIA	2.19118	18.7828		MITOCHONDRIA	4.8234	21.2156		MITOCHONDRIA	2.18305	19.0176		LD	2.78447	19
LD	0.762997	17.0231		LD	2.41791	19.2786		LD				LD				LD				LD	1.5	19		LD	1.86323	18.3644		LD				LD				LYSOSOME
LYSOSOME				LYSOSOME	1.25637	18.5042		LYSOSOME	1.43934	17.8787		LYSOSOME				LYSOSOME	2.6274	19.2437		LYSOSOME	3	19		LYSOSOME	1	16		LYSOSOME				LYSOSOME

## Sheet: E08_E
Mitochondria			LD
lipid_class	CPA		lipid_class	CPA
CL	0.168052		DAG	0.00601976
DAG	0.0547082		PC	0.0136948
LPE	0.0499022		SM	0.0127499
LPI	0.0532264		TAG	0.967536
LPS	0.110183
PC	0.313652
PE	0.175519
PG	0.0747571
